# Supplementary material for: The Velvet Family of Fungal Regulators Contains a DNA-Binding Domain Structurally Similar to NF-κB
Source: PubMed Central journal article supplement (PMC3876986; doi:10.1371/journal.pbio.1001750), 2013-12-31
Supplement: pbio.1001750.s016.pdf [file pbio.1001750.s016.pdf]

| PEAK_ID | CHROMOSOME | PEAK_START | PEAK_END | PEAK_SCORE | PEAK_FDR | FEATURE_TRACK            | FEATURE_STRAND | FEATURE_START | FEATURE_END | FEATURE_TO_PEAK_DISTANCE | Parent | accession |
|---------|------------|------------|----------|------------|----------|--------------------------|----------------|---------------|-------------|--------------------------|--------|-----------|
| 2277    | CONTIG2    | 25126      | 25551    | 1.27       | 4.36E-02 | transcription_start_site | -              | 22026         | 22026       | -3312                    | 14     | AN0009    |
| 2277    | CONTIG2    | 25126      | 25551    | 1.27       | 4.36E-02 | transcription_start_site | +              | 24566         | 24566       | 772                      | 18     | AN0010    |
| 2277    | CONTIG2    | 25126      | 25551    | 1.27       | 4.36E-02 | transcription_start_site | +              | 24138         | 24138       | 1200                     | 17     | AN0010    |
| 2277    | CONTIG2    | 25126      | 25551    | 1.27       | 4.36E-02 | transcription_start_site | +              | 26209         | 26209       | -870                     | 19     | AN0011    |
| 2277    | CONTIG2    | 25126      | 25551    | 1.27       | 4.36E-02 | transcription_start_site | +              | 26620         | 26620       | -1281                    | 20     | AN0011    |
| 2277    | CONTIG2    | 25126      | 25551    | 1.27       | 4.36E-02 | transcription_start_site | +              | 26757         | 26757       | -1418                    | 21     | AN0011    |
| 2277    | CONTIG2    | 25126      | 25551    | 1.27       | 4.36E-02 | transcription_start_site | +              | 27319         | 27319       | -1980                    | 22     | AN0011    |
| 590     | CONTIG2    | 74042      | 74303    | 2.32       | 0.00E+00 | transcription_start_site | -              | 73218         | 73218       | -954                     | 50     | AN0017    |
| 590     | CONTIG2    | 74042      | 74303    | 2.32       | 0.00E+00 | transcription_start_site | -              | 73024         | 73024       | -1148                    | 51     | AN0017    |
| 1286    | CONTIG2    | 75677      | 76037    | 1.7        | 5.20E-03 | transcription_start_site | -              | 73218         | 73218       | -2639                    | 50     | AN0017    |
| 1286    | CONTIG2    | 75677      | 76037    | 1.7        | 5.20E-03 | transcription_start_site | -              | 73024         | 73024       | -2833                    | 51     | AN0017    |
| 2068    | CONTIG2    | 74717      | 75291    | 1.34       | 3.08E-02 | transcription_start_site | -              | 73218         | 73218       | -1786                    | 50     | AN0017    |
| 2068    | CONTIG2    | 74717      | 75291    | 1.34       | 3.08E-02 | transcription_start_site | -              | 73024         | 73024       | -1980                    | 51     | AN0017    |
| 590     | CONTIG2    | 74042      | 74303    | 2.32       | 0.00E+00 | transcription_start_site | +              | 73927         | 73927       | 245                      | 52     | AN0018    |
| 590     | CONTIG2    | 74042      | 74303    | 2.32       | 0.00E+00 | transcription_start_site | +              | 74648         | 74648       | -475                     | 53     | AN0018    |
| 590     | CONTIG2    | 74042      | 74303    | 2.32       | 0.00E+00 | transcription_start_site | +              | 75130         | 75130       | -957                     | 54     | AN0018    |
| 1286    | CONTIG2    | 75677      | 76037    | 1.7        | 5.20E-03 | transcription_start_site | +              | 75130         | 75130       | 727                      | 54     | AN0018    |
| 2068    | CONTIG2    | 74717      | 75291    | 1.34       | 3.08E-02 | transcription_start_site | +              | 75130         | 75130       | -126                     | 54     | AN0018    |
| 2068    | CONTIG2    | 74717      | 75291    | 1.34       | 3.08E-02 | transcription_start_site | +              | 74648         | 74648       | 356                      | 53     | AN0018    |
| 2068    | CONTIG2    | 74717      | 75291    | 1.34       | 3.08E-02 | transcription_start_site | +              | 73927         | 73927       | 1077                     | 52     | AN0018    |
| 590     | CONTIG2    | 74042      | 74303    | 2.32       | 0.00E+00 | transcription_start_site | +              | 76862         | 76862       | -2689                    | 55     | AN0019    |
| 590     | CONTIG2    | 74042      | 74303    | 2.32       | 0.00E+00 | transcription_start_site | +              | 77018         | 77018       | -2845                    | 56     | AN0019    |
| 590     | CONTIG2    | 74042      | 74303    | 2.32       | 0.00E+00 | transcription_start_site | +              | 77350         | 77350       | -3177                    | 57     | AN0019    |
| 1286    | CONTIG2    | 75677      | 76037    | 1.7        | 5.20E-03 | transcription_start_site | +              | 76862         | 76862       | -1005                    | 55     | AN0019    |
| 1286    | CONTIG2    | 75677      | 76037    | 1.7        | 5.20E-03 | transcription_start_site | +              | 77018         | 77018       | -1161                    | 56     | AN0019    |
| 1286    | CONTIG2    | 75677      | 76037    | 1.7        | 5.20E-03 | transcription_start_site | +              | 77350         | 77350       | -1493                    | 57     | AN0019    |
| 2068    | CONTIG2    | 74717      | 75291    | 1.34       | 3.08E-02 | transcription_start_site | +              | 76862         | 76862       | -1858                    | 55     | AN0019    |
| 2068    | CONTIG2    | 74717      | 75291    | 1.34       | 3.08E-02 | transcription_start_site | +              | 77018         | 77018       | -2014                    | 56     | AN0019    |
| 2068    | CONTIG2    | 74717      | 75291    | 1.34       | 3.08E-02 | transcription_start_site | +              | 77350         | 77350       | -2346                    | 57     | AN0019    |
| 1969    | CONTIG2    | 93984      | 94418    | 1.38       | 2.62E-02 | transcription_start_site | -              | 90373         | 90373       | -3828                    | 73     | AN0024    |
| 1969    | CONTIG2    | 93984      | 94418    | 1.38       | 2.62E-02 | transcription_start_site | -              | 90259         | 90259       | -3942                    | 74     | AN0024    |
| 1969    | CONTIG2    | 93984      | 94418    | 1.38       | 2.62E-02 | transcription_start_site | -              | 90119         | 90119       | -4082                    | 75     | AN0024    |
| 1969    | CONTIG2    | 93984      | 94418    | 1.38       | 2.62E-02 | transcription_start_site | -              | 89998         | 89998       | -4203                    | 76     | AN0024    |
| 1969    | CONTIG2    | 93984      | 94418    | 1.38       | 2.62E-02 | transcription_start_site | -              | 89867         | 89867       | -4334                    | 77     | AN0024    |
| 1969    | CONTIG2    | 93984      | 94418    | 1.38       | 2.62E-02 | transcription_start_site | -              | 89566         | 89566       | -4635                    | 78     | AN0024    |
| 2975    | CONTIG2    | 92719      | 93653    | 0.94       | 1.50E-01 | transcription_start_site | -              | 90373         | 90373       | -2813                    | 73     | AN0024    |
| 2975    | CONTIG2    | 92719      | 93653    | 0.94       | 1.50E-01 | transcription_start_site | -              | 90259         | 90259       | -2927                    | 74     | AN0024    |
| 2975    | CONTIG2    | 92719      | 93653    | 0.94       | 1.50E-01 | transcription_start_site | -              | 90119         | 90119       | -3067                    | 75     | AN0024    |
| 2975    | CONTIG2    | 92719      | 93653    | 0.94       | 1.50E-01 | transcription_start_site | -              | 89998         | 89998       | -3188                    | 76     | AN0024    |
| 2975    | CONTIG2    | 92719      | 93653    | 0.94       | 1.50E-01 | transcription_start_site | -              | 89867         | 89867       | -3319                    | 77     | AN0024    |
| 2975    | CONTIG2    | 92719      | 93653    | 0.94       | 1.50E-01 | transcription_start_site | -              | 89566         | 89566       | -3620                    | 78     | AN0024    |
| 1969    | CONTIG2    | 93984      | 94418    | 1.38       | 2.62E-02 | transcription_start_site | -              | 92486         | 92486       | -1715                    | 79     | AN0025    |
| 1969    | CONTIG2    | 93984      | 94418    | 1.38       | 2.62E-02 | transcription_start_site | -              | 92063         | 92063       | -2138                    | 80     | AN0025    |
| 1969    | CONTIG2    | 93984      | 94418    | 1.38       | 2.62E-02 | transcription_start_site | -              | 91376         | 91376       | -2825                    | 81     | AN0025    |
| 2975    | CONTIG2    | 92719      | 93653    | 0.94       | 1.50E-01 | transcription_start_site | -              | 92486         | 92486       | -700                     | 79     | AN0025    |
| 2975    | CONTIG2    | 92719      | 93653    | 0.94       | 1.50E-01 | transcription_start_site | -              | 92063         | 92063       | -1123                    | 80     | AN0025    |
| 2975    | CONTIG2    | 92719      | 93653    | 0.94       | 1.50E-01 | transcription_start_site | -              | 91376         | 91376       | -1810                    | 81     | AN0025    |
| 1969    | CONTIG2    | 93984      | 94418    | 1.38       | 2.62E-02 | transcription_start_site | +              | 93155         | 93155       | 1046                     | 83     | AN0026    |
| 1969    | CONTIG2    | 93984      | 94418    | 1.38       | 2.62E-02 | transcription_start_site | +              | 93000         | 93000       | 1201                     | 82     | AN0026    |
| 2975    | CONTIG2    | 92719      | 93653    | 0.94       | 1.50E-01 | transcription_start_site | +              | 93155         | 93155       | 31                       | 83     | AN0026    |
| 2975    | CONTIG2    | 92719      | 93653    | 0.94       | 1.50E-01 | transcription_start_site | +              | 93000         | 93000       | 186                      | 82     | AN0026    |
| 1969    | CONTIG2    | 93984      | 94418    | 1.38       | 2.62E-02 | transcription_start_site | +              | 99025         | 99025       | -4824                    | 89     | AN0029    |
| 1969    | CONTIG2    | 93984      | 94418    | 1.38       | 2.62E-02 | transcription_start_site | +              | 99354         | 99354       | -5153                    | 90     | AN0029    |
| 1120    | CONTIG2    | 115512     | 115781   | 1.81       | 3.03E-03 | transcription_start_site | -              | 110851        | 110851      | -4795                    | 97     | AN0032    |
| 1120    | CONTIG2    | 115512     | 115781   | 1.81       | 3.03E-03 | transcription_start_site | -              | 110657        | 110657      | -4989                    | 98     | AN0032    |
| 2702    | CONTIG2    | 111453     | 111892   | 1.12       | 8.01E-02 | transcription_start_site | -              | 110851        | 110851      | -821                     | 97     | AN0032    |

|      |         |        |        |      |          |                          |   |        |        |       |     |        |
|------|---------|--------|--------|------|----------|--------------------------|---|--------|--------|-------|-----|--------|
| 2702 | CONTIG2 | 111453 | 111892 | 1.12 | 8.01E-02 | transcription_start_site | - | 110657 | 110657 | -1015 | 98  | AN0032 |
| 2702 | CONTIG2 | 111453 | 111892 | 1.12 | 8.01E-02 | transcription_start_site | - | 110462 | 110462 | -1210 | 99  | AN0032 |
| 2702 | CONTIG2 | 111453 | 111892 | 1.12 | 8.01E-02 | transcription_start_site | + | 111443 | 111443 | 229   | 101 | AN0033 |
| 2702 | CONTIG2 | 111453 | 111892 | 1.12 | 8.01E-02 | transcription_start_site | + | 111270 | 111270 | 402   | 100 | AN0033 |
| 911  | CONTIG2 | 116782 | 117141 | 1.99 | 1.01E-03 | transcription_start_site | - | 115420 | 115420 | -1541 | 102 | AN0034 |
| 911  | CONTIG2 | 116782 | 117141 | 1.99 | 1.01E-03 | transcription_start_site | - | 115263 | 115263 | -1698 | 103 | AN0034 |
| 911  | CONTIG2 | 116782 | 117141 | 1.99 | 1.01E-03 | transcription_start_site | - | 114707 | 114707 | -2254 | 104 | AN0034 |
| 911  | CONTIG2 | 116782 | 117141 | 1.99 | 1.01E-03 | transcription_start_site | - | 114035 | 114035 | -2926 | 105 | AN0034 |
| 1120 | CONTIG2 | 115512 | 115781 | 1.81 | 3.03E-03 | transcription_start_site | - | 115420 | 115420 | -226  | 102 | AN0034 |
| 1120 | CONTIG2 | 115512 | 115781 | 1.81 | 3.03E-03 | transcription_start_site | - | 115263 | 115263 | -383  | 103 | AN0034 |
| 1120 | CONTIG2 | 115512 | 115781 | 1.81 | 3.03E-03 | transcription_start_site | - | 114707 | 114707 | -939  | 104 | AN0034 |
| 1120 | CONTIG2 | 115512 | 115781 | 1.81 | 3.03E-03 | transcription_start_site | - | 114035 | 114035 | -1611 | 105 | AN0034 |
| 1226 | CONTIG2 | 118292 | 118851 | 1.74 | 1.22E-03 | transcription_start_site | - | 115420 | 115420 | -3151 | 102 | AN0034 |
| 1226 | CONTIG2 | 118292 | 118851 | 1.74 | 1.22E-03 | transcription_start_site | - | 115263 | 115263 | -3308 | 103 | AN0034 |
| 1226 | CONTIG2 | 118292 | 118851 | 1.74 | 1.22E-03 | transcription_start_site | - | 114707 | 114707 | -3864 | 104 | AN0034 |
| 1226 | CONTIG2 | 118292 | 118851 | 1.74 | 1.22E-03 | transcription_start_site | - | 114035 | 114035 | -4536 | 105 | AN0034 |
| 1970 | CONTIG2 | 117232 | 117816 | 1.38 | 2.62E-02 | transcription_start_site | - | 115420 | 115420 | -2104 | 102 | AN0034 |
| 1970 | CONTIG2 | 117232 | 117816 | 1.38 | 2.62E-02 | transcription_start_site | - | 115263 | 115263 | -2261 | 103 | AN0034 |
| 1970 | CONTIG2 | 117232 | 117816 | 1.38 | 2.62E-02 | transcription_start_site | - | 114707 | 114707 | -2817 | 104 | AN0034 |
| 1970 | CONTIG2 | 117232 | 117816 | 1.38 | 2.62E-02 | transcription_start_site | - | 114035 | 114035 | -3489 | 105 | AN0034 |
| 911  | CONTIG2 | 116782 | 117141 | 1.99 | 1.01E-03 | transcription_start_site | + | 118643 | 118643 | -1681 | 106 | AN0035 |
| 911  | CONTIG2 | 116782 | 117141 | 1.99 | 1.01E-03 | transcription_start_site | + | 119220 | 119220 | -2258 | 107 | AN0035 |
| 911  | CONTIG2 | 116782 | 117141 | 1.99 | 1.01E-03 | transcription_start_site | + | 119381 | 119381 | -2419 | 108 | AN0035 |
| 911  | CONTIG2 | 116782 | 117141 | 1.99 | 1.01E-03 | transcription_start_site | + | 119861 | 119861 | -2899 | 109 | AN0035 |
| 911  | CONTIG2 | 116782 | 117141 | 1.99 | 1.01E-03 | transcription_start_site | + | 120281 | 120281 | -3319 | 110 | AN0035 |
| 1120 | CONTIG2 | 115512 | 115781 | 1.81 | 3.03E-03 | transcription_start_site | + | 118643 | 118643 | -2996 | 106 | AN0035 |
| 1120 | CONTIG2 | 115512 | 115781 | 1.81 | 3.03E-03 | transcription_start_site | + | 119220 | 119220 | -3573 | 107 | AN0035 |
| 1120 | CONTIG2 | 115512 | 115781 | 1.81 | 3.03E-03 | transcription_start_site | + | 119381 | 119381 | -3734 | 108 | AN0035 |
| 1120 | CONTIG2 | 115512 | 115781 | 1.81 | 3.03E-03 | transcription_start_site | + | 119861 | 119861 | -4214 | 109 | AN0035 |
| 1120 | CONTIG2 | 115512 | 115781 | 1.81 | 3.03E-03 | transcription_start_site | + | 120281 | 120281 | -4634 | 110 | AN0035 |
| 1226 | CONTIG2 | 118292 | 118851 | 1.74 | 1.22E-03 | transcription_start_site | + | 118643 | 118643 | -71   | 106 | AN0035 |
| 1226 | CONTIG2 | 118292 | 118851 | 1.74 | 1.22E-03 | transcription_start_site | + | 119220 | 119220 | -648  | 107 | AN0035 |
| 1226 | CONTIG2 | 118292 | 118851 | 1.74 | 1.22E-03 | transcription_start_site | + | 119381 | 119381 | -809  | 108 | AN0035 |
| 1226 | CONTIG2 | 118292 | 118851 | 1.74 | 1.22E-03 | transcription_start_site | + | 119861 | 119861 | -1289 | 109 | AN0035 |
| 1226 | CONTIG2 | 118292 | 118851 | 1.74 | 1.22E-03 | transcription_start_site | + | 120281 | 120281 | -1709 | 110 | AN0035 |
| 1970 | CONTIG2 | 117232 | 117816 | 1.38 | 2.62E-02 | transcription_start_site | + | 118643 | 118643 | -1119 | 106 | AN0035 |
| 1970 | CONTIG2 | 117232 | 117816 | 1.38 | 2.62E-02 | transcription_start_site | + | 119220 | 119220 | -1696 | 107 | AN0035 |
| 1970 | CONTIG2 | 117232 | 117816 | 1.38 | 2.62E-02 | transcription_start_site | + | 119381 | 119381 | -1857 | 108 | AN0035 |
| 1970 | CONTIG2 | 117232 | 117816 | 1.38 | 2.62E-02 | transcription_start_site | + | 119861 | 119861 | -2337 | 109 | AN0035 |
| 1970 | CONTIG2 | 117232 | 117816 | 1.38 | 2.62E-02 | transcription_start_site | + | 120281 | 120281 | -2757 | 110 | AN0035 |
| 911  | CONTIG2 | 116782 | 117141 | 1.99 | 1.01E-03 | transcription_start_site | + | 121024 | 121024 | -4062 | 111 | AN0036 |
| 911  | CONTIG2 | 116782 | 117141 | 1.99 | 1.01E-03 | transcription_start_site | + | 121123 | 121123 | -4161 | 112 | AN0036 |
| 1226 | CONTIG2 | 118292 | 118851 | 1.74 | 1.22E-03 | transcription_start_site | + | 121024 | 121024 | -2452 | 111 | AN0036 |
| 1226 | CONTIG2 | 118292 | 118851 | 1.74 | 1.22E-03 | transcription_start_site | + | 121123 | 121123 | -2551 | 112 | AN0036 |
| 1970 | CONTIG2 | 117232 | 117816 | 1.38 | 2.62E-02 | transcription_start_site | + | 121024 | 121024 | -3500 | 111 | AN0036 |
| 1970 | CONTIG2 | 117232 | 117816 | 1.38 | 2.62E-02 | transcription_start_site | + | 121123 | 121123 | -3599 | 112 | AN0036 |
| 2870 | CONTIG2 | 156545 | 157104 | 1.02 | 1.07E-01 | transcription_start_site | - | 151883 | 151883 | -4941 | 133 | AN0043 |
| 2870 | CONTIG2 | 156545 | 157104 | 1.02 | 1.07E-01 | transcription_start_site | - | 151627 | 151627 | -5197 | 134 | AN0043 |
| 2871 | CONTIG2 | 155030 | 155389 | 1.02 | 1.25E-01 | transcription_start_site | - | 151883 | 151883 | -3326 | 133 | AN0043 |
| 2871 | CONTIG2 | 155030 | 155389 | 1.02 | 1.25E-01 | transcription_start_site | - | 151627 | 151627 | -3582 | 134 | AN0043 |
| 2870 | CONTIG2 | 156545 | 157104 | 1.02 | 1.07E-01 | transcription_start_site | - | 157153 | 157153 | 328   | 137 | AN0045 |
| 2870 | CONTIG2 | 156545 | 157104 | 1.02 | 1.07E-01 | transcription_start_site | - | 157406 | 157406 | 581   | 136 | AN0045 |
| 3008 | CONTIG2 | 157370 | 158004 | 0.91 | 1.79E-01 | transcription_start_site | - | 157406 | 157406 | -281  | 136 | AN0045 |
| 3008 | CONTIG2 | 157370 | 158004 | 0.91 | 1.79E-01 | transcription_start_site | - | 157153 | 157153 | -534  | 137 | AN0045 |
| 3008 | CONTIG2 | 157370 | 158004 | 0.91 | 1.79E-01 | transcription_start_site | - | 158769 | 158769 | 1082  | 142 | AN0046 |
| 2906 | CONTIG3 | 15463  | 15812  | 1    | 1.93E-01 | transcription_start_site | - | 12438  | 12438  | -3199 | 153 | AN0054 |
| 2906 | CONTIG3 | 15463  | 15812  | 1    | 1.93E-01 | transcription_start_site | - | 12002  | 12002  | -3635 | 154 | AN0054 |

|      |         |       |       |      |          |                          |   |       |       |       |     |        |
|------|---------|-------|-------|------|----------|--------------------------|---|-------|-------|-------|-----|--------|
| 2906 | CONTIG3 | 15463 | 15812 | 1    | 1.93E-01 | transcription_start_site | - | 10845 | 10845 | -4792 | 155 | AN0054 |
| 2906 | CONTIG3 | 15463 | 15812 | 1    | 1.93E-01 | transcription_start_site | + | 14722 | 14722 | 915   | 156 | AN0055 |
| 405  | CONTIG3 | 20038 | 20617 | 2.59 | 0.00E+00 | transcription_start_site | - | 18585 | 18585 | -1742 | 157 | AN0056 |
| 656  | CONTIG3 | 18908 | 19257 | 2.23 | 9.51E-04 | transcription_start_site | - | 18585 | 18585 | -497  | 157 | AN0056 |
| 405  | CONTIG3 | 20038 | 20617 | 2.59 | 0.00E+00 | transcription_start_site | + | 22996 | 22996 | -2668 | 158 | AN0057 |
| 405  | CONTIG3 | 20038 | 20617 | 2.59 | 0.00E+00 | transcription_start_site | + | 23657 | 23657 | -3329 | 159 | AN0057 |
| 405  | CONTIG3 | 20038 | 20617 | 2.59 | 0.00E+00 | transcription_start_site | + | 23775 | 23775 | -3447 | 160 | AN0057 |
| 656  | CONTIG3 | 18908 | 19257 | 2.23 | 9.51E-04 | transcription_start_site | + | 22996 | 22996 | -3913 | 158 | AN0057 |
| 656  | CONTIG3 | 18908 | 19257 | 2.23 | 9.51E-04 | transcription_start_site | + | 23657 | 23657 | -4574 | 159 | AN0057 |
| 656  | CONTIG3 | 18908 | 19257 | 2.23 | 9.51E-04 | transcription_start_site | + | 23775 | 23775 | -4692 | 160 | AN0057 |
| 2847 | CONTIG3 | 27168 | 27427 | 1.04 | 1.66E-01 | transcription_start_site | - | 26067 | 26067 | -1230 | 161 | AN0058 |
| 2847 | CONTIG3 | 27168 | 27427 | 1.04 | 1.66E-01 | transcription_start_site | + | 26778 | 26778 | 519   | 162 | AN0059 |
| 2848 | CONTIG3 | 43364 | 43644 | 1.04 | 1.66E-01 | transcription_start_site | - | 40765 | 40765 | -2739 | 175 | AN0065 |
| 2848 | CONTIG3 | 43364 | 43644 | 1.04 | 1.66E-01 | transcription_start_site | - | 40611 | 40611 | -2893 | 176 | AN0065 |
| 2848 | CONTIG3 | 43364 | 43644 | 1.04 | 1.66E-01 | transcription_start_site | - | 40344 | 40344 | -3160 | 177 | AN0065 |
| 2848 | CONTIG3 | 43364 | 43644 | 1.04 | 1.66E-01 | transcription_start_site | + | 42386 | 42386 | 1118  | 183 | AN0066 |
| 2848 | CONTIG3 | 43364 | 43644 | 1.04 | 1.66E-01 | transcription_start_site | + | 43688 | 43688 | -184  | 184 | AN0067 |
| 2848 | CONTIG3 | 43364 | 43644 | 1.04 | 1.66E-01 | transcription_start_site | + | 43793 | 43793 | -289  | 185 | AN0067 |
| 2848 | CONTIG3 | 43364 | 43644 | 1.04 | 1.66E-01 | transcription_start_site | + | 44140 | 44140 | -636  | 186 | AN0067 |
| 2848 | CONTIG3 | 43364 | 43644 | 1.04 | 1.66E-01 | transcription_start_site | + | 44521 | 44521 | -1017 | 187 | AN0067 |
| 2507 | CONTIG3 | 49434 | 49943 | 1.2  | 9.24E-02 | transcription_start_site | - | 46098 | 46098 | -3590 | 188 | AN0068 |
| 2507 | CONTIG3 | 49434 | 49943 | 1.2  | 9.24E-02 | transcription_start_site | - | 45950 | 45950 | -3738 | 189 | AN0068 |
| 1933 | CONTIG3 | 51619 | 51878 | 1.39 | 4.36E-02 | transcription_start_site | - | 49927 | 49927 | -1821 | 190 | AN0069 |
| 1933 | CONTIG3 | 51619 | 51878 | 1.39 | 4.36E-02 | transcription_start_site | - | 49586 | 49586 | -2162 | 191 | AN0069 |
| 1933 | CONTIG3 | 51619 | 51878 | 1.39 | 4.36E-02 | transcription_start_site | - | 49302 | 49302 | -2446 | 192 | AN0069 |
| 1933 | CONTIG3 | 51619 | 51878 | 1.39 | 4.36E-02 | transcription_start_site | - | 48972 | 48972 | -2776 | 193 | AN0069 |
| 1933 | CONTIG3 | 51619 | 51878 | 1.39 | 4.36E-02 | transcription_start_site | - | 48381 | 48381 | -3367 | 194 | AN0069 |
| 2507 | CONTIG3 | 49434 | 49943 | 1.2  | 9.24E-02 | transcription_start_site | - | 49586 | 49586 | -102  | 191 | AN0069 |
| 2507 | CONTIG3 | 49434 | 49943 | 1.2  | 9.24E-02 | transcription_start_site | - | 49927 | 49927 | 238   | 190 | AN0069 |
| 2507 | CONTIG3 | 49434 | 49943 | 1.2  | 9.24E-02 | transcription_start_site | - | 49302 | 49302 | -386  | 192 | AN0069 |
| 2507 | CONTIG3 | 49434 | 49943 | 1.2  | 9.24E-02 | transcription_start_site | - | 48972 | 48972 | -716  | 193 | AN0069 |
| 2507 | CONTIG3 | 49434 | 49943 | 1.2  | 9.24E-02 | transcription_start_site | - | 48381 | 48381 | -1307 | 194 | AN0069 |
| 2907 | CONTIG3 | 52884 | 53233 | 1    | 1.93E-01 | transcription_start_site | - | 49927 | 49927 | -3131 | 190 | AN0069 |
| 2907 | CONTIG3 | 52884 | 53233 | 1    | 1.93E-01 | transcription_start_site | - | 49586 | 49586 | -3472 | 191 | AN0069 |
| 2907 | CONTIG3 | 52884 | 53233 | 1    | 1.93E-01 | transcription_start_site | - | 49302 | 49302 | -3756 | 192 | AN0069 |
| 2907 | CONTIG3 | 52884 | 53233 | 1    | 1.93E-01 | transcription_start_site | - | 48972 | 48972 | -4086 | 193 | AN0069 |
| 2907 | CONTIG3 | 52884 | 53233 | 1    | 1.93E-01 | transcription_start_site | - | 48381 | 48381 | -4677 | 194 | AN0069 |
| 1933 | CONTIG3 | 51619 | 51878 | 1.39 | 4.36E-02 | transcription_start_site | - | 51105 | 51105 | -643  | 195 | AN0070 |
| 1933 | CONTIG3 | 51619 | 51878 | 1.39 | 4.36E-02 | transcription_start_site | - | 50649 | 50649 | -1099 | 196 | AN0070 |
| 1933 | CONTIG3 | 51619 | 51878 | 1.39 | 4.36E-02 | transcription_start_site | - | 50416 | 50416 | -1332 | 197 | AN0070 |
| 2507 | CONTIG3 | 49434 | 49943 | 1.2  | 9.24E-02 | transcription_start_site | - | 50416 | 50416 | 727   | 197 | AN0070 |
| 2507 | CONTIG3 | 49434 | 49943 | 1.2  | 9.24E-02 | transcription_start_site | - | 50649 | 50649 | 960   | 196 | AN0070 |
| 2907 | CONTIG3 | 52884 | 53233 | 1    | 1.93E-01 | transcription_start_site | - | 51105 | 51105 | -1953 | 195 | AN0070 |
| 2907 | CONTIG3 | 52884 | 53233 | 1    | 1.93E-01 | transcription_start_site | - | 50649 | 50649 | -2409 | 196 | AN0070 |
| 2907 | CONTIG3 | 52884 | 53233 | 1    | 1.93E-01 | transcription_start_site | - | 50416 | 50416 | -2642 | 197 | AN0070 |
| 1933 | CONTIG3 | 51619 | 51878 | 1.39 | 4.36E-02 | transcription_start_site | + | 52164 | 52164 | -415  | 198 | AN0071 |
| 1933 | CONTIG3 | 51619 | 51878 | 1.39 | 4.36E-02 | transcription_start_site | + | 52296 | 52296 | -547  | 199 | AN0071 |
| 1933 | CONTIG3 | 51619 | 51878 | 1.39 | 4.36E-02 | transcription_start_site | + | 52548 | 52548 | -799  | 200 | AN0071 |
| 1933 | CONTIG3 | 51619 | 51878 | 1.39 | 4.36E-02 | transcription_start_site | + | 55650 | 55650 | -3901 | 201 | AN0071 |
| 2507 | CONTIG3 | 49434 | 49943 | 1.2  | 9.24E-02 | transcription_start_site | + | 52164 | 52164 | -2475 | 198 | AN0071 |
| 2507 | CONTIG3 | 49434 | 49943 | 1.2  | 9.24E-02 | transcription_start_site | + | 52296 | 52296 | -2607 | 199 | AN0071 |
| 2507 | CONTIG3 | 49434 | 49943 | 1.2  | 9.24E-02 | transcription_start_site | + | 52548 | 52548 | -2859 | 200 | AN0071 |
| 2907 | CONTIG3 | 52884 | 53233 | 1    | 1.93E-01 | transcription_start_site | + | 52548 | 52548 | 510   | 200 | AN0071 |
| 2907 | CONTIG3 | 52884 | 53233 | 1    | 1.93E-01 | transcription_start_site | + | 52296 | 52296 | 762   | 199 | AN0071 |
| 2907 | CONTIG3 | 52884 | 53233 | 1    | 1.93E-01 | transcription_start_site | + | 52164 | 52164 | 894   | 198 | AN0071 |
| 2907 | CONTIG3 | 52884 | 53233 | 1    | 1.93E-01 | transcription_start_site | + | 55650 | 55650 | -2591 | 201 | AN0071 |
| 1934 | CONTIG3 | 60080 | 60354 | 1.39 | 4.36E-02 | transcription_start_site | - | 57290 | 57290 | -2927 | 202 | AN0072 |

|              |        |        |      |          |                          |   |        |        |       |            |
|--------------|--------|--------|------|----------|--------------------------|---|--------|--------|-------|------------|
| 1934 CONTIG3 | 60080  | 60354  | 1.39 | 4.36E-02 | transcription_start_site | - | 57207  | 57207  | -3010 | 203 AN0072 |
| 2907 CONTIG3 | 52884  | 53233  | 1    | 1.93E-01 | transcription_start_site | + | 57641  | 57641  | -4582 | 204 AN0073 |
| 2907 CONTIG3 | 52884  | 53233  | 1    | 1.93E-01 | transcription_start_site | + | 57914  | 57914  | -4855 | 205 AN0073 |
| 1934 CONTIG3 | 60080  | 60354  | 1.39 | 4.36E-02 | transcription_start_site | - | 60474  | 60474  | 257   | 209 AN0074 |
| 1934 CONTIG3 | 60080  | 60354  | 1.39 | 4.36E-02 | transcription_start_site | - | 61222  | 61222  | 1005  | 208 AN0074 |
| 1396 CONTIG3 | 80721  | 81065  | 1.63 | 1.57E-02 | transcription_start_site | + | 81101  | 81101  | -208  | 231 AN0081 |
| 1396 CONTIG3 | 80721  | 81065  | 1.63 | 1.57E-02 | transcription_start_site | + | 81327  | 81327  | -434  | 232 AN0081 |
| 1396 CONTIG3 | 80721  | 81065  | 1.63 | 1.57E-02 | transcription_start_site | + | 82095  | 82095  | -1202 | 233 AN0081 |
| 1396 CONTIG3 | 80721  | 81065  | 1.63 | 1.57E-02 | transcription_start_site | + | 82241  | 82241  | -1348 | 234 AN0081 |
| 1396 CONTIG3 | 80721  | 81065  | 1.63 | 1.57E-02 | transcription_start_site | + | 82423  | 82423  | -1530 | 235 AN0081 |
| 1396 CONTIG3 | 80721  | 81065  | 1.63 | 1.57E-02 | transcription_start_site | + | 83818  | 83818  | -2925 | 236 AN0082 |
| 1396 CONTIG3 | 80721  | 81065  | 1.63 | 1.57E-02 | transcription_start_site | + | 84491  | 84491  | -3598 | 237 AN0082 |
| 1396 CONTIG3 | 80721  | 81065  | 1.63 | 1.57E-02 | transcription_start_site | + | 84835  | 84835  | -3942 | 238 AN0082 |
| 1853 CONTIG3 | 83864  | 84133  | 1.43 | 3.70E-02 | transcription_start_site | + | 83818  | 83818  | 180   | 236 AN0082 |
| 1853 CONTIG3 | 83864  | 84133  | 1.43 | 3.70E-02 | transcription_start_site | + | 84491  | 84491  | -492  | 237 AN0082 |
| 1853 CONTIG3 | 83864  | 84133  | 1.43 | 3.70E-02 | transcription_start_site | + | 84835  | 84835  | -836  | 238 AN0082 |
| 1326 CONTIG3 | 96693  | 96952  | 1.67 | 1.30E-02 | transcription_start_site | - | 92299  | 92299  | -4523 | 250 AN0085 |
| 1326 CONTIG3 | 96693  | 96952  | 1.67 | 1.30E-02 | transcription_start_site | - | 95477  | 95477  | -1345 | 254 AN0086 |
| 1326 CONTIG3 | 96693  | 96952  | 1.67 | 1.30E-02 | transcription_start_site | - | 95140  | 95140  | -1682 | 255 AN0086 |
| 1326 CONTIG3 | 96693  | 96952  | 1.67 | 1.30E-02 | transcription_start_site | - | 94692  | 94692  | -2130 | 256 AN0086 |
| 1326 CONTIG3 | 96693  | 96952  | 1.67 | 1.30E-02 | transcription_start_site | - | 94556  | 94556  | -2266 | 257 AN0086 |
| 1326 CONTIG3 | 96693  | 96952  | 1.67 | 1.30E-02 | transcription_start_site | - | 94105  | 94105  | -2717 | 258 AN0086 |
| 1326 CONTIG3 | 96693  | 96952  | 1.67 | 1.30E-02 | transcription_start_site | + | 98130  | 98130  | -1307 | 259 AN0087 |
| 1326 CONTIG3 | 96693  | 96952  | 1.67 | 1.30E-02 | transcription_start_site | + | 98435  | 98435  | -1612 | 260 AN0087 |
| 2779 CONTIG3 | 106430 | 106721 | 1.08 | 1.44E-01 | transcription_start_site | - | 101732 | 101732 | -4843 | 261 AN0088 |
| 2779 CONTIG3 | 106430 | 106721 | 1.08 | 1.44E-01 | transcription_start_site | - | 101550 | 101550 | -5025 | 262 AN0088 |
| 2779 CONTIG3 | 106430 | 106721 | 1.08 | 1.44E-01 | transcription_start_site | - | 103238 | 103238 | -3337 | 266 AN0089 |
| 2779 CONTIG3 | 106430 | 106721 | 1.08 | 1.44E-01 | transcription_start_site | - | 103150 | 103150 | -3425 | 267 AN0089 |
| 2779 CONTIG3 | 106430 | 106721 | 1.08 | 1.44E-01 | transcription_start_site | - | 103034 | 103034 | -3541 | 268 AN0089 |
| 2779 CONTIG3 | 106430 | 106721 | 1.08 | 1.44E-01 | transcription_start_site | - | 102885 | 102885 | -3690 | 269 AN0089 |
| 2779 CONTIG3 | 106430 | 106721 | 1.08 | 1.44E-01 | transcription_start_site | - | 102656 | 102656 | -3919 | 270 AN0089 |
| 2779 CONTIG3 | 106430 | 106721 | 1.08 | 1.44E-01 | transcription_start_site | - | 102457 | 102457 | -4118 | 271 AN0089 |
| 2779 CONTIG3 | 106430 | 106721 | 1.08 | 1.44E-01 | transcription_start_site | - | 106291 | 106291 | -284  | 275 AN0091 |
| 2779 CONTIG3 | 106430 | 106721 | 1.08 | 1.44E-01 | transcription_start_site | - | 105692 | 105692 | -883  | 276 AN0091 |
| 2779 CONTIG3 | 106430 | 106721 | 1.08 | 1.44E-01 | transcription_start_site | - | 107255 | 107255 | 679   | 280 AN0092 |
| 2779 CONTIG3 | 106430 | 106721 | 1.08 | 1.44E-01 | transcription_start_site | + | 109671 | 109671 | -3095 | 281 AN0093 |
| 2779 CONTIG3 | 106430 | 106721 | 1.08 | 1.44E-01 | transcription_start_site | + | 109843 | 109843 | -3267 | 282 AN0093 |
| 2779 CONTIG3 | 106430 | 106721 | 1.08 | 1.44E-01 | transcription_start_site | + | 111715 | 111715 | -5139 | 283 AN0093 |
| 211 CONTIG3  | 119328 | 119752 | 2.91 | 0.00E+00 | transcription_start_site | - | 115492 | 115492 | -4048 | 287 AN0094 |
| 211 CONTIG3  | 119328 | 119752 | 2.91 | 0.00E+00 | transcription_start_site | - | 115248 | 115248 | -4292 | 288 AN0094 |
| 211 CONTIG3  | 119328 | 119752 | 2.91 | 0.00E+00 | transcription_start_site | - | 115151 | 115151 | -4389 | 289 AN0094 |
| 211 CONTIG3  | 119328 | 119752 | 2.91 | 0.00E+00 | transcription_start_site | - | 114765 | 114765 | -4775 | 290 AN0094 |
| 2849 CONTIG3 | 115953 | 116992 | 1.04 | 1.66E-01 | transcription_start_site | - | 115492 | 115492 | -980  | 287 AN0094 |
| 2849 CONTIG3 | 115953 | 116992 | 1.04 | 1.66E-01 | transcription_start_site | - | 115248 | 115248 | -1224 | 288 AN0094 |
| 2849 CONTIG3 | 115953 | 116992 | 1.04 | 1.66E-01 | transcription_start_site | - | 115151 | 115151 | -1321 | 289 AN0094 |
| 2849 CONTIG3 | 115953 | 116992 | 1.04 | 1.66E-01 | transcription_start_site | - | 114765 | 114765 | -1707 | 290 AN0094 |
| 2849 CONTIG3 | 115953 | 116992 | 1.04 | 1.66E-01 | transcription_start_site | - | 113975 | 113975 | -2497 | 291 AN0094 |
| 2849 CONTIG3 | 115953 | 116992 | 1.04 | 1.66E-01 | transcription_start_site | - | 113873 | 113873 | -2599 | 292 AN0094 |
| 2849 CONTIG3 | 115953 | 116992 | 1.04 | 1.66E-01 | transcription_start_site | - | 113750 | 113750 | -2722 | 293 AN0094 |
| 2849 CONTIG3 | 115953 | 116992 | 1.04 | 1.66E-01 | transcription_start_site | - | 113434 | 113434 | -3038 | 294 AN0094 |
| 2849 CONTIG3 | 115953 | 116992 | 1.04 | 1.66E-01 | transcription_start_site | - | 112691 | 112691 | -3781 | 295 AN0094 |
| 211 CONTIG3  | 119328 | 119752 | 2.91 | 0.00E+00 | transcription_start_site | - | 119588 | 119588 | 48    | 296 AN0095 |
| 211 CONTIG3  | 119328 | 119752 | 2.91 | 0.00E+00 | transcription_start_site | + | 120336 | 120336 | -796  | 297 AN0096 |
| 211 CONTIG3  | 119328 | 119752 | 2.91 | 0.00E+00 | transcription_start_site | + | 120455 | 120455 | -915  | 298 AN0096 |
| 211 CONTIG3  | 119328 | 119752 | 2.91 | 0.00E+00 | transcription_start_site | + | 120748 | 120748 | -1208 | 299 AN0096 |
| 211 CONTIG3  | 119328 | 119752 | 2.91 | 0.00E+00 | transcription_start_site | + | 122202 | 122202 | -2662 | 300 AN0096 |
| 211 CONTIG3  | 119328 | 119752 | 2.91 | 0.00E+00 | transcription_start_site | + | 122369 | 122369 | -2829 | 301 AN0096 |

|      |         |        |        |      |          |                          |   |        |        |       |     |        |
|------|---------|--------|--------|------|----------|--------------------------|---|--------|--------|-------|-----|--------|
| 211  | CONTIG3 | 119328 | 119752 | 2.91 | 0.00E+00 | transcription_start_site | + | 122688 | 122688 | -3148 | 302 | AN0096 |
| 211  | CONTIG3 | 119328 | 119752 | 2.91 | 0.00E+00 | transcription_start_site | + | 122885 | 122885 | -3345 | 303 | AN0096 |
| 211  | CONTIG3 | 119328 | 119752 | 2.91 | 0.00E+00 | transcription_start_site | + | 123900 | 123900 | -4360 | 304 | AN0096 |
| 2849 | CONTIG3 | 115953 | 116992 | 1.04 | 1.66E-01 | transcription_start_site | + | 120336 | 120336 | -3863 | 297 | AN0096 |
| 2849 | CONTIG3 | 115953 | 116992 | 1.04 | 1.66E-01 | transcription_start_site | + | 120455 | 120455 | -3982 | 298 | AN0096 |
| 2849 | CONTIG3 | 115953 | 116992 | 1.04 | 1.66E-01 | transcription_start_site | + | 120748 | 120748 | -4275 | 299 | AN0096 |
| 211  | CONTIG3 | 119328 | 119752 | 2.91 | 0.00E+00 | transcription_start_site | + | 124162 | 124162 | -4622 | 305 | AN0097 |
| 211  | CONTIG3 | 119328 | 119752 | 2.91 | 0.00E+00 | transcription_start_site | + | 124296 | 124296 | -4756 | 306 | AN0097 |
| 1995 | CONTIG4 | 17106  | 17390  | 1.37 | 4.36E-02 | transcription_start_site | - | 16612  | 16612  | -636  | 335 | AN0103 |
| 1995 | CONTIG4 | 17106  | 17390  | 1.37 | 4.36E-02 | transcription_start_site | - | 16534  | 16534  | -714  | 336 | AN0103 |
| 1995 | CONTIG4 | 17106  | 17390  | 1.37 | 4.36E-02 | transcription_start_site | - | 15826  | 15826  | -1422 | 337 | AN0103 |
| 1995 | CONTIG4 | 17106  | 17390  | 1.37 | 4.36E-02 | transcription_start_site | - | 15349  | 15349  | -1899 | 338 | AN0103 |
| 1996 | CONTIG4 | 21396  | 21895  | 1.37 | 4.36E-02 | transcription_start_site | - | 16612  | 16612  | -5033 | 335 | AN0103 |
| 1996 | CONTIG4 | 21396  | 21895  | 1.37 | 4.36E-02 | transcription_start_site | - | 16534  | 16534  | -5111 | 336 | AN0103 |
| 1995 | CONTIG4 | 17106  | 17390  | 1.37 | 4.36E-02 | transcription_start_site | + | 18189  | 18189  | -941  | 339 | AN0104 |
| 1995 | CONTIG4 | 17106  | 17390  | 1.37 | 4.36E-02 | transcription_start_site | + | 18374  | 18374  | -1126 | 340 | AN0104 |
| 1995 | CONTIG4 | 17106  | 17390  | 1.37 | 4.36E-02 | transcription_start_site | + | 18953  | 18953  | -1705 | 341 | AN0104 |
| 1996 | CONTIG4 | 21396  | 21895  | 1.37 | 4.36E-02 | transcription_start_site | - | 20148  | 20148  | -1497 | 342 | AN0105 |
| 1996 | CONTIG4 | 21396  | 21895  | 1.37 | 4.36E-02 | transcription_start_site | - | 19784  | 19784  | -1861 | 343 | AN0105 |
| 1995 | CONTIG4 | 17106  | 17390  | 1.37 | 4.36E-02 | transcription_start_site | + | 21586  | 21586  | -4338 | 344 | AN0106 |
| 1995 | CONTIG4 | 17106  | 17390  | 1.37 | 4.36E-02 | transcription_start_site | + | 22074  | 22074  | -4826 | 345 | AN0106 |
| 1996 | CONTIG4 | 21396  | 21895  | 1.37 | 4.36E-02 | transcription_start_site | + | 21586  | 21586  | 59    | 344 | AN0106 |
| 1996 | CONTIG4 | 21396  | 21895  | 1.37 | 4.36E-02 | transcription_start_site | + | 22074  | 22074  | -428  | 345 | AN0106 |
| 1996 | CONTIG4 | 21396  | 21895  | 1.37 | 4.36E-02 | transcription_start_site | + | 22399  | 22399  | -753  | 346 | AN0106 |
| 1996 | CONTIG4 | 21396  | 21895  | 1.37 | 4.36E-02 | transcription_start_site | + | 23018  | 23018  | -1372 | 347 | AN0106 |
| 1996 | CONTIG4 | 21396  | 21895  | 1.37 | 4.36E-02 | transcription_start_site | + | 23469  | 23469  | -1823 | 348 | AN0106 |
| 1996 | CONTIG4 | 21396  | 21895  | 1.37 | 4.36E-02 | transcription_start_site | + | 23908  | 23908  | -2262 | 349 | AN0106 |
| 1996 | CONTIG4 | 21396  | 21895  | 1.37 | 4.36E-02 | transcription_start_site | + | 24530  | 24530  | -2884 | 350 | AN0106 |
| 1996 | CONTIG4 | 21396  | 21895  | 1.37 | 4.36E-02 | transcription_start_site | + | 24781  | 24781  | -3135 | 351 | AN0106 |
| 1996 | CONTIG4 | 21396  | 21895  | 1.37 | 4.36E-02 | transcription_start_site | + | 25242  | 25242  | -3596 | 352 | AN0106 |
| 1996 | CONTIG4 | 21396  | 21895  | 1.37 | 4.36E-02 | transcription_start_site | + | 26719  | 26719  | -5073 | 353 | AN0107 |
| 2561 | CONTIG4 | 69454  | 69803  | 1.18 | 9.24E-02 | transcription_start_site | - | 65111  | 65111  | -4517 | 387 | AN0116 |
| 2561 | CONTIG4 | 69454  | 69803  | 1.18 | 9.24E-02 | transcription_start_site | - | 64924  | 64924  | -4704 | 388 | AN0116 |
| 3011 | CONTIG4 | 64444  | 65903  | 0.9  | 1.58E-01 | transcription_start_site | - | 65111  | 65111  | -62   | 387 | AN0116 |
| 3011 | CONTIG4 | 64444  | 65903  | 0.9  | 1.58E-01 | transcription_start_site | - | 64924  | 64924  | -249  | 388 | AN0116 |
| 1303 | CONTIG4 | 63079  | 63353  | 1.69 | 1.11E-02 | transcription_start_site | + | 65613  | 65613  | -2397 | 389 | AN0117 |
| 1303 | CONTIG4 | 63079  | 63353  | 1.69 | 1.11E-02 | transcription_start_site | + | 65714  | 65714  | -2498 | 390 | AN0117 |
| 1303 | CONTIG4 | 63079  | 63353  | 1.69 | 1.11E-02 | transcription_start_site | + | 66008  | 66008  | -2792 | 391 | AN0117 |
| 1303 | CONTIG4 | 63079  | 63353  | 1.69 | 1.11E-02 | transcription_start_site | + | 66488  | 66488  | -3272 | 392 | AN0117 |
| 1303 | CONTIG4 | 63079  | 63353  | 1.69 | 1.11E-02 | transcription_start_site | + | 66913  | 66913  | -3697 | 393 | AN0117 |
| 2560 | CONTIG4 | 61964  | 62233  | 1.18 | 9.24E-02 | transcription_start_site | + | 65613  | 65613  | -3514 | 389 | AN0117 |
| 2560 | CONTIG4 | 61964  | 62233  | 1.18 | 9.24E-02 | transcription_start_site | + | 65714  | 65714  | -3615 | 390 | AN0117 |
| 2560 | CONTIG4 | 61964  | 62233  | 1.18 | 9.24E-02 | transcription_start_site | + | 66008  | 66008  | -3909 | 391 | AN0117 |
| 2560 | CONTIG4 | 61964  | 62233  | 1.18 | 9.24E-02 | transcription_start_site | + | 66488  | 66488  | -4389 | 392 | AN0117 |
| 2560 | CONTIG4 | 61964  | 62233  | 1.18 | 9.24E-02 | transcription_start_site | + | 66913  | 66913  | -4814 | 393 | AN0117 |
| 3011 | CONTIG4 | 64444  | 65903  | 0.9  | 1.58E-01 | transcription_start_site | + | 65613  | 65613  | -439  | 389 | AN0117 |
| 3011 | CONTIG4 | 64444  | 65903  | 0.9  | 1.58E-01 | transcription_start_site | + | 65714  | 65714  | -540  | 390 | AN0117 |
| 3011 | CONTIG4 | 64444  | 65903  | 0.9  | 1.58E-01 | transcription_start_site | + | 66008  | 66008  | -834  | 391 | AN0117 |
| 3011 | CONTIG4 | 64444  | 65903  | 0.9  | 1.58E-01 | transcription_start_site | + | 66488  | 66488  | -1314 | 392 | AN0117 |
| 3011 | CONTIG4 | 64444  | 65903  | 0.9  | 1.58E-01 | transcription_start_site | + | 66913  | 66913  | -1739 | 393 | AN0117 |
| 2472 | CONTIG4 | 82204  | 82478  | 1.21 | 8.01E-02 | transcription_start_site | - | 81977  | 81977  | -364  | 394 | AN0118 |
| 2472 | CONTIG4 | 82204  | 82478  | 1.21 | 8.01E-02 | transcription_start_site | - | 81630  | 81630  | -711  | 395 | AN0118 |
| 2472 | CONTIG4 | 82204  | 82478  | 1.21 | 8.01E-02 | transcription_start_site | + | 86128  | 86128  | -3787 | 404 | AN0120 |
| 2472 | CONTIG4 | 82204  | 82478  | 1.21 | 8.01E-02 | transcription_start_site | + | 86399  | 86399  | -4058 | 405 | AN0120 |
| 2472 | CONTIG4 | 82204  | 82478  | 1.21 | 8.01E-02 | transcription_start_site | + | 86732  | 86732  | -4391 | 406 | AN0120 |
| 92   | CONTIG4 | 110630 | 111219 | 3.25 | 0.00E+00 | transcription_start_site | - | 105826 | 105826 | -5098 | 422 | AN0127 |
| 92   | CONTIG4 | 110630 | 111219 | 3.25 | 0.00E+00 | transcription_start_site | - | 105717 | 105717 | -5207 | 423 | AN0127 |

|      |         |        |        |      |          |                          |   |        |        |       |     |        |
|------|---------|--------|--------|------|----------|--------------------------|---|--------|--------|-------|-----|--------|
| 92   | CONTIG4 | 110630 | 111219 | 3.25 | 0.00E+00 | transcription_start_site | + | 112277 | 112277 | -1352 | 432 | AN0129 |
| 92   | CONTIG4 | 110630 | 111219 | 3.25 | 0.00E+00 | transcription_start_site | + | 113083 | 113083 | -2158 | 433 | AN0129 |
| 92   | CONTIG4 | 110630 | 111219 | 3.25 | 0.00E+00 | transcription_start_site | + | 114154 | 114154 | -3229 | 434 | AN0129 |
| 92   | CONTIG4 | 110630 | 111219 | 3.25 | 0.00E+00 | transcription_start_site | + | 114322 | 114322 | -3397 | 435 | AN0129 |
| 92   | CONTIG4 | 110630 | 111219 | 3.25 | 0.00E+00 | transcription_start_site | + | 114433 | 114433 | -3508 | 436 | AN0129 |
| 1613 | CONTIG4 | 111826 | 112475 | 1.53 | 1.06E-02 | transcription_start_site | + | 112277 | 112277 | -126  | 432 | AN0129 |
| 1613 | CONTIG4 | 111826 | 112475 | 1.53 | 1.06E-02 | transcription_start_site | + | 113083 | 113083 | -932  | 433 | AN0129 |
| 1613 | CONTIG4 | 111826 | 112475 | 1.53 | 1.06E-02 | transcription_start_site | + | 114154 | 114154 | -2003 | 434 | AN0129 |
| 1613 | CONTIG4 | 111826 | 112475 | 1.53 | 1.06E-02 | transcription_start_site | + | 114322 | 114322 | -2171 | 435 | AN0129 |
| 1613 | CONTIG4 | 111826 | 112475 | 1.53 | 1.06E-02 | transcription_start_site | + | 114433 | 114433 | -2282 | 436 | AN0129 |
| 1613 | CONTIG4 | 111826 | 112475 | 1.53 | 1.06E-02 | transcription_start_site | + | 117259 | 117259 | -5108 | 437 | AN0130 |
| 2813 | CONTIG4 | 129394 | 129670 | 1.06 | 1.44E-01 | transcription_start_site | - | 124818 | 124818 | -4714 | 442 | AN0133 |
| 2813 | CONTIG4 | 129394 | 129670 | 1.06 | 1.44E-01 | transcription_start_site | - | 124447 | 124447 | -5085 | 443 | AN0133 |
| 2813 | CONTIG4 | 129394 | 129670 | 1.06 | 1.44E-01 | transcription_start_site | + | 129728 | 129728 | -196  | 449 | AN0135 |
| 2813 | CONTIG4 | 129394 | 129670 | 1.06 | 1.44E-01 | transcription_start_site | + | 129923 | 129923 | -391  | 450 | AN0135 |
| 216  | CONTIG4 | 134789 | 135053 | 2.9  | 0.00E+00 | transcription_start_site | - | 134821 | 134821 | -100  | 451 | AN0136 |
| 216  | CONTIG4 | 134789 | 135053 | 2.9  | 0.00E+00 | transcription_start_site | - | 134686 | 134686 | -235  | 452 | AN0136 |
| 216  | CONTIG4 | 134789 | 135053 | 2.9  | 0.00E+00 | transcription_start_site | - | 134458 | 134458 | -463  | 453 | AN0136 |
| 216  | CONTIG4 | 134789 | 135053 | 2.9  | 0.00E+00 | transcription_start_site | + | 135556 | 135556 | -635  | 454 | AN0137 |
| 216  | CONTIG4 | 134789 | 135053 | 2.9  | 0.00E+00 | transcription_start_site | + | 135754 | 135754 | -833  | 455 | AN0137 |
| 216  | CONTIG4 | 134789 | 135053 | 2.9  | 0.00E+00 | transcription_start_site | + | 138649 | 138649 | -3728 | 456 | AN0137 |
| 216  | CONTIG4 | 134789 | 135053 | 2.9  | 0.00E+00 | transcription_start_site | + | 139101 | 139101 | -4180 | 457 | AN0137 |
| 216  | CONTIG4 | 134789 | 135053 | 2.9  | 0.00E+00 | transcription_start_site | + | 139928 | 139928 | -5007 | 458 | AN0138 |
| 216  | CONTIG4 | 134789 | 135053 | 2.9  | 0.00E+00 | transcription_start_site | + | 140037 | 140037 | -5116 | 459 | AN0138 |
| 2562 | CONTIG4 | 149794 | 150143 | 1.18 | 9.24E-02 | transcription_start_site | - | 148068 | 148068 | -1900 | 469 | AN0141 |
| 2562 | CONTIG4 | 149794 | 150143 | 1.18 | 9.24E-02 | transcription_start_site | - | 150224 | 150224 | 255   | 472 | AN0143 |
| 2562 | CONTIG4 | 149794 | 150143 | 1.18 | 9.24E-02 | transcription_start_site | - | 150476 | 150476 | 507   | 471 | AN0143 |
| 1815 | CONTIG5 | 46958  | 47458  | 1.45 | 1.66E-01 | transcription_start_site | - | 43001  | 43001  | -4207 | 500 | AN0158 |
| 1815 | CONTIG5 | 46958  | 47458  | 1.45 | 1.66E-01 | transcription_start_site | - | 42173  | 42173  | -5035 | 501 | AN0158 |
| 1815 | CONTIG5 | 46958  | 47458  | 1.45 | 1.66E-01 | transcription_start_site | + | 47834  | 47834  | -626  | 503 | AN0159 |
| 289  | CONTIG5 | 54909  | 55193  | 2.78 | 3.03E-03 | transcription_start_site | - | 51690  | 51690  | -3361 | 505 | AN0161 |
| 289  | CONTIG5 | 54909  | 55193  | 2.78 | 3.03E-03 | transcription_start_site | - | 51445  | 51445  | -3606 | 506 | AN0161 |
| 289  | CONTIG5 | 54909  | 55193  | 2.78 | 3.03E-03 | transcription_start_site | - | 50643  | 50643  | -4408 | 507 | AN0161 |
| 289  | CONTIG5 | 54909  | 55193  | 2.78 | 3.03E-03 | transcription_start_site | - | 54027  | 54027  | -1024 | 508 | AN0162 |
| 289  | CONTIG5 | 54909  | 55193  | 2.78 | 3.03E-03 | transcription_start_site | - | 53855  | 53855  | -1196 | 509 | AN0162 |
| 289  | CONTIG5 | 54909  | 55193  | 2.78 | 3.03E-03 | transcription_start_site | - | 53576  | 53576  | -1475 | 510 | AN0162 |
| 289  | CONTIG5 | 54909  | 55193  | 2.78 | 3.03E-03 | transcription_start_site | - | 53348  | 53348  | -1703 | 511 | AN0162 |
| 289  | CONTIG5 | 54909  | 55193  | 2.78 | 3.03E-03 | transcription_start_site | - | 52473  | 52473  | -2578 | 512 | AN0162 |
| 289  | CONTIG5 | 54909  | 55193  | 2.78 | 3.03E-03 | transcription_start_site | + | 56587  | 56587  | -1536 | 513 | AN0163 |
| 289  | CONTIG5 | 54909  | 55193  | 2.78 | 3.03E-03 | transcription_start_site | + | 56883  | 56883  | -1832 | 514 | AN0163 |
| 289  | CONTIG5 | 54909  | 55193  | 2.78 | 3.03E-03 | transcription_start_site | + | 57272  | 57272  | -2221 | 515 | AN0163 |
| 289  | CONTIG5 | 54909  | 55193  | 2.78 | 3.03E-03 | transcription_start_site | + | 57378  | 57378  | -2327 | 516 | AN0163 |
| 1967 | CONTIG5 | 67507  | 68076  | 1.39 | 1.93E-01 | transcription_start_site | - | 64652  | 64652  | -3139 | 522 | AN0166 |
| 1967 | CONTIG5 | 67507  | 68076  | 1.39 | 1.93E-01 | transcription_start_site | - | 64584  | 64584  | -3207 | 523 | AN0166 |
| 1967 | CONTIG5 | 67507  | 68076  | 1.39 | 1.93E-01 | transcription_start_site | - | 64253  | 64253  | -3538 | 524 | AN0166 |
| 1967 | CONTIG5 | 67507  | 68076  | 1.39 | 1.93E-01 | transcription_start_site | - | 63281  | 63281  | -4510 | 525 | AN0166 |
| 1967 | CONTIG5 | 67507  | 68076  | 1.39 | 1.93E-01 | transcription_start_site | + | 71382  | 71382  | -3590 | 528 | AN0168 |
| 1179 | CONTIG5 | 74626  | 74920  | 1.78 | 6.84E-02 | transcription_start_site | - | 74403  | 74403  | -370  | 529 | AN0169 |
| 1179 | CONTIG5 | 74626  | 74920  | 1.78 | 6.84E-02 | transcription_start_site | + | 74725  | 74725  | 48    | 531 | AN0170 |
| 1179 | CONTIG5 | 74626  | 74920  | 1.78 | 6.84E-02 | transcription_start_site | + | 75007  | 75007  | -234  | 532 | AN0170 |
| 1179 | CONTIG5 | 74626  | 74920  | 1.78 | 6.84E-02 | transcription_start_site | + | 74428  | 74428  | 345   | 530 | AN0170 |
| 908  | CONTIG5 | 79426  | 79945  | 2    | 3.70E-02 | transcription_start_site | - | 78653  | 78653  | -1032 | 533 | AN0171 |
| 908  | CONTIG5 | 79426  | 79945  | 2    | 3.70E-02 | transcription_start_site | - | 78439  | 78439  | -1246 | 534 | AN0171 |
| 908  | CONTIG5 | 79426  | 79945  | 2    | 3.70E-02 | transcription_start_site | - | 78066  | 78066  | -1619 | 535 | AN0171 |
| 908  | CONTIG5 | 79426  | 79945  | 2    | 3.70E-02 | transcription_start_site | - | 77735  | 77735  | -1950 | 536 | AN0171 |
| 908  | CONTIG5 | 79426  | 79945  | 2    | 3.70E-02 | transcription_start_site | + | 84692  | 84692  | -5006 | 537 | AN0172 |
| 843  | CONTIG5 | 95479  | 96368  | 2.06 | 1.81E-02 | transcription_start_site | + | 97554  | 97554  | -1630 | 549 | AN0176 |



|      |         |        |        |      |          |                          |   |        |        |       |     |        |
|------|---------|--------|--------|------|----------|--------------------------|---|--------|--------|-------|-----|--------|
| 843  | CONTIG5 | 95479  | 96368  | 2.06 | 1.81E-02 | transcription_start_site | + | 97929  | 97929  | -2005 | 550 | AN0176 |
| 843  | CONTIG5 | 95479  | 96368  | 2.06 | 1.81E-02 | transcription_start_site | + | 98495  | 98495  | -2571 | 551 | AN0176 |
| 581  | CONTIG5 | 102237 | 102741 | 2.34 | 1.30E-02 | transcription_start_site | - | 100141 | 100141 | -2348 | 552 | AN0177 |
| 581  | CONTIG5 | 102237 | 102741 | 2.34 | 1.30E-02 | transcription_start_site | - | 99939  | 99939  | -2550 | 553 | AN0177 |
| 581  | CONTIG5 | 102237 | 102741 | 2.34 | 1.30E-02 | transcription_start_site | - | 101453 | 101453 | -1036 | 554 | AN0178 |
| 581  | CONTIG5 | 102237 | 102741 | 2.34 | 1.30E-02 | transcription_start_site | - | 101034 | 101034 | -1455 | 555 | AN0178 |
| 581  | CONTIG5 | 102237 | 102741 | 2.34 | 1.30E-02 | transcription_start_site | - | 100899 | 100899 | -1590 | 556 | AN0178 |
| 581  | CONTIG5 | 102237 | 102741 | 2.34 | 1.30E-02 | transcription_start_site | + | 105189 | 105189 | -2700 | 557 | AN0179 |
| 581  | CONTIG5 | 102237 | 102741 | 2.34 | 1.30E-02 | transcription_start_site | + | 105671 | 105671 | -3182 | 558 | AN0179 |
| 581  | CONTIG5 | 102237 | 102741 | 2.34 | 1.30E-02 | transcription_start_site | + | 106029 | 106029 | -3540 | 559 | AN0179 |
| 581  | CONTIG5 | 102237 | 102741 | 2.34 | 1.30E-02 | transcription_start_site | + | 106135 | 106135 | -3646 | 560 | AN0179 |
| 581  | CONTIG5 | 102237 | 102741 | 2.34 | 1.30E-02 | transcription_start_site | + | 106296 | 106296 | -3807 | 561 | AN0179 |
| 849  | CONTIG5 | 106512 | 106781 | 2.06 | 3.08E-02 | transcription_start_site | + | 106296 | 106296 | 350   | 561 | AN0179 |
| 849  | CONTIG5 | 106512 | 106781 | 2.06 | 3.08E-02 | transcription_start_site | + | 106135 | 106135 | 511   | 560 | AN0179 |
| 849  | CONTIG5 | 106512 | 106781 | 2.06 | 3.08E-02 | transcription_start_site | + | 106029 | 106029 | 617   | 559 | AN0179 |
| 849  | CONTIG5 | 106512 | 106781 | 2.06 | 3.08E-02 | transcription_start_site | + | 105671 | 105671 | 975   | 558 | AN0179 |
| 849  | CONTIG5 | 106512 | 106781 | 2.06 | 3.08E-02 | transcription_start_site | - | 107468 | 107468 | 821   | 562 | AN0180 |
| 1711 | CONTIG5 | 111393 | 111737 | 1.5  | 1.44E-01 | transcription_start_site | - | 107468 | 107468 | -4097 | 562 | AN0180 |
| 849  | CONTIG5 | 106512 | 106781 | 2.06 | 3.08E-02 | transcription_start_site | + | 108260 | 108260 | -1613 | 563 | AN0181 |
| 849  | CONTIG5 | 106512 | 106781 | 2.06 | 3.08E-02 | transcription_start_site | + | 109233 | 109233 | -2586 | 564 | AN0181 |
| 1711 | CONTIG5 | 111393 | 111737 | 1.5  | 1.44E-01 | transcription_start_site | + | 111931 | 111931 | -366  | 565 | AN0182 |
| 1711 | CONTIG5 | 111393 | 111737 | 1.5  | 1.44E-01 | transcription_start_site | + | 112073 | 112073 | -508  | 566 | AN0182 |
| 1711 | CONTIG5 | 111393 | 111737 | 1.5  | 1.44E-01 | transcription_start_site | + | 112247 | 112247 | -682  | 567 | AN0182 |
| 1711 | CONTIG5 | 111393 | 111737 | 1.5  | 1.44E-01 | transcription_start_site | + | 112585 | 112585 | -1020 | 568 | AN0182 |
| 290  | CONTIG5 | 117995 | 118481 | 2.78 | 3.03E-03 | transcription_start_site | - | 114512 | 114512 | -3726 | 569 | AN0183 |
| 290  | CONTIG5 | 117995 | 118481 | 2.78 | 3.03E-03 | transcription_start_site | - | 114456 | 114456 | -3782 | 570 | AN0183 |
| 290  | CONTIG5 | 117995 | 118481 | 2.78 | 3.03E-03 | transcription_start_site | - | 114211 | 114211 | -4027 | 571 | AN0183 |
| 290  | CONTIG5 | 117995 | 118481 | 2.78 | 3.03E-03 | transcription_start_site | - | 113542 | 113542 | -4696 | 572 | AN0183 |
| 1711 | CONTIG5 | 111393 | 111737 | 1.5  | 1.44E-01 | transcription_start_site | + | 114973 | 114973 | -3408 | 573 | AN0184 |
| 1711 | CONTIG5 | 111393 | 111737 | 1.5  | 1.44E-01 | transcription_start_site | + | 115059 | 115059 | -3494 | 574 | AN0184 |
| 1711 | CONTIG5 | 111393 | 111737 | 1.5  | 1.44E-01 | transcription_start_site | + | 115247 | 115247 | -3682 | 575 | AN0184 |
| 1711 | CONTIG5 | 111393 | 111737 | 1.5  | 1.44E-01 | transcription_start_site | + | 115451 | 115451 | -3886 | 576 | AN0184 |
| 290  | CONTIG5 | 117995 | 118481 | 2.78 | 3.03E-03 | transcription_start_site | - | 117928 | 117928 | -310  | 577 | AN0185 |
| 290  | CONTIG5 | 117995 | 118481 | 2.78 | 3.03E-03 | transcription_start_site | - | 117831 | 117831 | -407  | 578 | AN0185 |
| 844  | CONTIG5 | 121430 | 121859 | 2.06 | 1.81E-02 | transcription_start_site | - | 117928 | 117928 | -3716 | 577 | AN0185 |
| 844  | CONTIG5 | 121430 | 121859 | 2.06 | 1.81E-02 | transcription_start_site | - | 117831 | 117831 | -3813 | 578 | AN0185 |
| 290  | CONTIG5 | 117995 | 118481 | 2.78 | 3.03E-03 | transcription_start_site | + | 118494 | 118494 | -256  | 579 | AN0186 |
| 290  | CONTIG5 | 117995 | 118481 | 2.78 | 3.03E-03 | transcription_start_site | + | 118696 | 118696 | -458  | 580 | AN0186 |
| 290  | CONTIG5 | 117995 | 118481 | 2.78 | 3.03E-03 | transcription_start_site | + | 119295 | 119295 | -1057 | 581 | AN0186 |
| 290  | CONTIG5 | 117995 | 118481 | 2.78 | 3.03E-03 | transcription_start_site | + | 119542 | 119542 | -1304 | 582 | AN0186 |
| 844  | CONTIG5 | 121430 | 121859 | 2.06 | 1.81E-02 | transcription_start_site | - | 121783 | 121783 | 138   | 584 | AN0187 |
| 844  | CONTIG5 | 121430 | 121859 | 2.06 | 1.81E-02 | transcription_start_site | - | 122051 | 122051 | 406   | 583 | AN0187 |
| 582  | CONTIG5 | 151962 | 152241 | 2.34 | 1.30E-02 | transcription_start_site | - | 147330 | 147330 | -4771 | 615 | AN0198 |
| 582  | CONTIG5 | 151962 | 152241 | 2.34 | 1.30E-02 | transcription_start_site | - | 151943 | 151943 | -158  | 617 | AN0200 |
| 582  | CONTIG5 | 151962 | 152241 | 2.34 | 1.30E-02 | transcription_start_site | - | 151606 | 151606 | -495  | 618 | AN0200 |
| 582  | CONTIG5 | 151962 | 152241 | 2.34 | 1.30E-02 | transcription_start_site | - | 151319 | 151319 | -782  | 619 | AN0200 |
| 582  | CONTIG5 | 151962 | 152241 | 2.34 | 1.30E-02 | transcription_start_site | - | 152861 | 152861 | 759   | 623 | AN0201 |
| 582  | CONTIG5 | 151962 | 152241 | 2.34 | 1.30E-02 | transcription_start_site | + | 155411 | 155411 | -3309 | 624 | AN0202 |
| 582  | CONTIG5 | 151962 | 152241 | 2.34 | 1.30E-02 | transcription_start_site | + | 156044 | 156044 | -3942 | 625 | AN0202 |
| 683  | CONTIG5 | 175738 | 176002 | 2.22 | 1.84E-02 | transcription_start_site | - | 171316 | 171316 | -4554 | 641 | AN0208 |
| 683  | CONTIG5 | 175738 | 176002 | 2.22 | 1.84E-02 | transcription_start_site | - | 171076 | 171076 | -4794 | 642 | AN0208 |
| 683  | CONTIG5 | 175738 | 176002 | 2.22 | 1.84E-02 | transcription_start_site | - | 170763 | 170763 | -5107 | 643 | AN0208 |
| 683  | CONTIG5 | 175738 | 176002 | 2.22 | 1.84E-02 | transcription_start_site | + | 176349 | 176349 | -479  | 652 | AN0210 |
| 683  | CONTIG5 | 175738 | 176002 | 2.22 | 1.84E-02 | transcription_start_site | + | 176420 | 176420 | -550  | 653 | AN0210 |
| 683  | CONTIG5 | 175738 | 176002 | 2.22 | 1.84E-02 | transcription_start_site | + | 176504 | 176504 | -634  | 654 | AN0210 |
| 683  | CONTIG5 | 175738 | 176002 | 2.22 | 1.84E-02 | transcription_start_site | + | 176689 | 176689 | -819  | 655 | AN0210 |
| 683  | CONTIG5 | 175738 | 176002 | 2.22 | 1.84E-02 | transcription_start_site | + | 179705 | 179705 | -3835 | 656 | AN0211 |

|      |         |        |        |      |          |                          |   |        |        |       |     |        |
|------|---------|--------|--------|------|----------|--------------------------|---|--------|--------|-------|-----|--------|
| 683  | CONTIG5 | 175738 | 176002 | 2.22 | 1.84E-02 | transcription_start_site | + | 180018 | 180018 | -4148 | 657 | AN0211 |
| 683  | CONTIG5 | 175738 | 176002 | 2.22 | 1.84E-02 | transcription_start_site | + | 180340 | 180340 | -4470 | 658 | AN0211 |
| 45   | CONTIG5 | 185794 | 186355 | 3.45 | 0.00E+00 | transcription_start_site | + | 186301 | 186301 | -226  | 661 | AN0213 |
| 907  | CONTIG5 | 187071 | 187625 | 2    | 2.18E-02 | transcription_start_site | + | 186301 | 186301 | 1047  | 661 | AN0213 |
| 45   | CONTIG5 | 185794 | 186355 | 3.45 | 0.00E+00 | transcription_start_site | + | 189660 | 189660 | -3585 | 662 | AN0214 |
| 45   | CONTIG5 | 185794 | 186355 | 3.45 | 0.00E+00 | transcription_start_site | + | 189853 | 189853 | -3778 | 663 | AN0214 |
| 45   | CONTIG5 | 185794 | 186355 | 3.45 | 0.00E+00 | transcription_start_site | + | 191069 | 191069 | -4994 | 664 | AN0214 |
| 907  | CONTIG5 | 187071 | 187625 | 2    | 2.18E-02 | transcription_start_site | + | 189660 | 189660 | -2312 | 662 | AN0214 |
| 907  | CONTIG5 | 187071 | 187625 | 2    | 2.18E-02 | transcription_start_site | + | 189853 | 189853 | -2505 | 663 | AN0214 |
| 907  | CONTIG5 | 187071 | 187625 | 2    | 2.18E-02 | transcription_start_site | + | 191069 | 191069 | -3721 | 664 | AN0214 |
| 1817 | CONTIG5 | 218711 | 219070 | 1.45 | 1.66E-01 | transcription_start_site | - | 219726 | 219726 | 835   | 714 | AN0223 |
| 1817 | CONTIG5 | 218711 | 219070 | 1.45 | 1.66E-01 | transcription_start_site | - | 219909 | 219909 | 1018  | 713 | AN0223 |
| 548  | CONTIG5 | 245490 | 245776 | 2.39 | 1.11E-02 | transcription_start_site | - | 245121 | 245121 | -512  | 728 | AN0229 |
| 548  | CONTIG5 | 245490 | 245776 | 2.39 | 1.11E-02 | transcription_start_site | - | 245055 | 245055 | -578  | 729 | AN0229 |
| 548  | CONTIG5 | 245490 | 245776 | 2.39 | 1.11E-02 | transcription_start_site | - | 243598 | 243598 | -2035 | 730 | AN0229 |
| 548  | CONTIG5 | 245490 | 245776 | 2.39 | 1.11E-02 | transcription_start_site | - | 243151 | 243151 | -2482 | 731 | AN0229 |
| 324  | CONTIG5 | 260180 | 260539 | 2.73 | 3.61E-03 | transcription_start_site | - | 255745 | 255745 | -4614 | 740 | AN0232 |
| 324  | CONTIG5 | 260180 | 260539 | 2.73 | 3.61E-03 | transcription_start_site | - | 255527 | 255527 | -4832 | 741 | AN0232 |
| 324  | CONTIG5 | 260180 | 260539 | 2.73 | 3.61E-03 | transcription_start_site | - | 255354 | 255354 | -5005 | 742 | AN0232 |
| 324  | CONTIG5 | 260180 | 260539 | 2.73 | 3.61E-03 | transcription_start_site | + | 259763 | 259763 | 596   | 752 | AN0234 |
| 324  | CONTIG5 | 260180 | 260539 | 2.73 | 3.61E-03 | transcription_start_site | + | 259496 | 259496 | 863   | 751 | AN0234 |
| 324  | CONTIG5 | 260180 | 260539 | 2.73 | 3.61E-03 | transcription_start_site | + | 260478 | 260478 | -118  | 753 | AN0235 |
| 324  | CONTIG5 | 260180 | 260539 | 2.73 | 3.61E-03 | transcription_start_site | + | 262157 | 262157 | -1797 | 754 | AN0235 |
| 324  | CONTIG5 | 260180 | 260539 | 2.73 | 3.61E-03 | transcription_start_site | + | 263534 | 263534 | -3174 | 755 | AN0235 |
| 100  | CONTIG5 | 275713 | 276064 | 3.23 | 5.64E-04 | transcription_start_site | - | 273403 | 273403 | -2485 | 756 | AN0237 |
| 100  | CONTIG5 | 275713 | 276064 | 3.23 | 5.64E-04 | transcription_start_site | - | 273196 | 273196 | -2692 | 757 | AN0237 |
| 100  | CONTIG5 | 275713 | 276064 | 3.23 | 5.64E-04 | transcription_start_site | - | 271367 | 271367 | -4521 | 758 | AN0237 |
| 734  | CONTIG5 | 276678 | 277107 | 2.17 | 1.06E-02 | transcription_start_site | - | 273403 | 273403 | -3489 | 756 | AN0237 |
| 734  | CONTIG5 | 276678 | 277107 | 2.17 | 1.06E-02 | transcription_start_site | - | 273196 | 273196 | -3696 | 757 | AN0237 |
| 1180 | CONTIG5 | 277963 | 278324 | 1.78 | 6.84E-02 | transcription_start_site | - | 273403 | 273403 | -4740 | 756 | AN0237 |
| 1180 | CONTIG5 | 277963 | 278324 | 1.78 | 6.84E-02 | transcription_start_site | - | 273196 | 273196 | -4947 | 757 | AN0237 |
| 100  | CONTIG5 | 275713 | 276064 | 3.23 | 5.64E-04 | transcription_start_site | + | 279748 | 279748 | -3859 | 761 | AN0239 |
| 734  | CONTIG5 | 276678 | 277107 | 2.17 | 1.06E-02 | transcription_start_site | + | 279748 | 279748 | -2855 | 761 | AN0239 |
| 1029 | CONTIG5 | 288154 | 288448 | 1.89 | 5.22E-02 | transcription_start_site | + | 287523 | 287523 | 778   | 768 | AN0239 |
| 1029 | CONTIG5 | 288154 | 288448 | 1.89 | 5.22E-02 | transcription_start_site | + | 287295 | 287295 | 1006  | 767 | AN0239 |
| 1180 | CONTIG5 | 277963 | 278324 | 1.78 | 6.84E-02 | transcription_start_site | + | 279748 | 279748 | -1604 | 761 | AN0239 |
| 1180 | CONTIG5 | 277963 | 278324 | 1.78 | 6.84E-02 | transcription_start_site | + | 282274 | 282274 | -4130 | 762 | AN0239 |
| 1180 | CONTIG5 | 277963 | 278324 | 1.78 | 6.84E-02 | transcription_start_site | + | 282683 | 282683 | -4539 | 763 | AN0239 |
| 1029 | CONTIG5 | 288154 | 288448 | 1.89 | 5.22E-02 | transcription_start_site | + | 288539 | 288539 | -238  | 769 | AN0240 |
| 1029 | CONTIG5 | 288154 | 288448 | 1.89 | 5.22E-02 | transcription_start_site | + | 288656 | 288656 | -355  | 770 | AN0240 |
| 1029 | CONTIG5 | 288154 | 288448 | 1.89 | 5.22E-02 | transcription_start_site | + | 289020 | 289020 | -719  | 771 | AN0240 |
| 1029 | CONTIG5 | 288154 | 288448 | 1.89 | 5.22E-02 | transcription_start_site | + | 289460 | 289460 | -1159 | 772 | AN0240 |
| 1029 | CONTIG5 | 288154 | 288448 | 1.89 | 5.22E-02 | transcription_start_site | + | 290636 | 290636 | -2335 | 773 | AN0241 |
| 1029 | CONTIG5 | 288154 | 288448 | 1.89 | 5.22E-02 | transcription_start_site | + | 291032 | 291032 | -2731 | 774 | AN0241 |
| 1029 | CONTIG5 | 288154 | 288448 | 1.89 | 5.22E-02 | transcription_start_site | + | 291418 | 291418 | -3117 | 775 | AN0241 |
| 1029 | CONTIG5 | 288154 | 288448 | 1.89 | 5.22E-02 | transcription_start_site | + | 291573 | 291573 | -3272 | 776 | AN0241 |
| 1029 | CONTIG5 | 288154 | 288448 | 1.89 | 5.22E-02 | transcription_start_site | + | 292100 | 292100 | -3799 | 777 | AN0242 |
| 1029 | CONTIG5 | 288154 | 288448 | 1.89 | 5.22E-02 | transcription_start_site | + | 292410 | 292410 | -4109 | 778 | AN0242 |
| 1712 | CONTIG5 | 297390 | 297734 | 1.5  | 1.44E-01 | transcription_start_site | + | 296469 | 296469 | 1093  | 782 | AN0243 |
| 1712 | CONTIG5 | 297390 | 297734 | 1.5  | 1.44E-01 | transcription_start_site | + | 297869 | 297869 | -307  | 783 | AN0244 |
| 1712 | CONTIG5 | 297390 | 297734 | 1.5  | 1.44E-01 | transcription_start_site | + | 298273 | 298273 | -711  | 784 | AN0244 |
| 1712 | CONTIG5 | 297390 | 297734 | 1.5  | 1.44E-01 | transcription_start_site | + | 298771 | 298771 | -1209 | 785 | AN0244 |
| 850  | CONTIG5 | 310131 | 310410 | 2.06 | 3.08E-02 | transcription_start_site | - | 309920 | 309920 | -350  | 788 | AN0246 |
| 850  | CONTIG5 | 310131 | 310410 | 2.06 | 3.08E-02 | transcription_start_site | - | 309628 | 309628 | -642  | 789 | AN0246 |
| 850  | CONTIG5 | 310131 | 310410 | 2.06 | 3.08E-02 | transcription_start_site | - | 309305 | 309305 | -965  | 790 | AN0246 |
| 850  | CONTIG5 | 310131 | 310410 | 2.06 | 3.08E-02 | transcription_start_site | - | 308843 | 308843 | -1427 | 791 | AN0246 |
| 850  | CONTIG5 | 310131 | 310410 | 2.06 | 3.08E-02 | transcription_start_site | - | 308649 | 308649 | -1621 | 792 | AN0246 |



|      |         |        |        |      |          |                          |   |        |        |       |     |        |
|------|---------|--------|--------|------|----------|--------------------------|---|--------|--------|-------|-----|--------|
| 850  | CONTIG5 | 310131 | 310410 | 2.06 | 3.08E-02 | transcription_start_site | - | 308185 | 308185 | -2085 | 793 | AN0246 |
| 850  | CONTIG5 | 310131 | 310410 | 2.06 | 3.08E-02 | transcription_start_site | - | 307975 | 307975 | -2295 | 794 | AN0246 |
| 850  | CONTIG5 | 310131 | 310410 | 2.06 | 3.08E-02 | transcription_start_site | + | 310850 | 310850 | -579  | 795 | AN0247 |
| 850  | CONTIG5 | 310131 | 310410 | 2.06 | 3.08E-02 | transcription_start_site | + | 313929 | 313929 | -3658 | 796 | AN0247 |
| 850  | CONTIG5 | 310131 | 310410 | 2.06 | 3.08E-02 | transcription_start_site | + | 314221 | 314221 | -3950 | 797 | AN0247 |
| 12   | CONTIG5 | 354757 | 355101 | 3.67 | 0.00E+00 | transcription_start_site | - | 355412 | 355412 | 483   | 871 | AN0264 |
| 12   | CONTIG5 | 354757 | 355101 | 3.67 | 0.00E+00 | transcription_start_site | - | 355499 | 355499 | 570   | 870 | AN0264 |
| 12   | CONTIG5 | 354757 | 355101 | 3.67 | 0.00E+00 | transcription_start_site | - | 355888 | 355888 | 959   | 869 | AN0264 |
| 12   | CONTIG5 | 354757 | 355101 | 3.67 | 0.00E+00 | transcription_start_site | + | 356551 | 356551 | -1622 | 872 | AN0265 |
| 12   | CONTIG5 | 354757 | 355101 | 3.67 | 0.00E+00 | transcription_start_site | + | 358134 | 358134 | -3205 | 873 | AN0265 |
| 12   | CONTIG5 | 354757 | 355101 | 3.67 | 0.00E+00 | transcription_start_site | + | 358368 | 358368 | -3439 | 874 | AN0265 |
| 12   | CONTIG5 | 354757 | 355101 | 3.67 | 0.00E+00 | transcription_start_site | + | 359530 | 359530 | -4601 | 875 | AN0265 |
| 909  | CONTIG5 | 364952 | 365226 | 2    | 3.70E-02 | transcription_start_site | - | 364987 | 364987 | -102  | 879 | AN0267 |
| 909  | CONTIG5 | 364952 | 365226 | 2    | 3.70E-02 | transcription_start_site | - | 364591 | 364591 | -498  | 880 | AN0267 |
| 909  | CONTIG5 | 364952 | 365226 | 2    | 3.70E-02 | transcription_start_site | + | 365832 | 365832 | -743  | 881 | AN0268 |
| 909  | CONTIG5 | 364952 | 365226 | 2    | 3.70E-02 | transcription_start_site | + | 366528 | 366528 | -1439 | 882 | AN0268 |
| 909  | CONTIG5 | 364952 | 365226 | 2    | 3.70E-02 | transcription_start_site | + | 366629 | 366629 | -1540 | 883 | AN0268 |
| 739  | CONTIG5 | 372977 | 373331 | 2.17 | 2.12E-02 | transcription_start_site | + | 372248 | 372248 | 906   | 889 | AN0270 |
| 291  | CONTIG5 | 377402 | 377686 | 2.78 | 3.03E-03 | transcription_start_site | - | 373231 | 373231 | -4313 | 890 | AN0271 |
| 291  | CONTIG5 | 377402 | 377686 | 2.78 | 3.03E-03 | transcription_start_site | - | 372793 | 372793 | -4751 | 891 | AN0271 |
| 291  | CONTIG5 | 377402 | 377686 | 2.78 | 3.03E-03 | transcription_start_site | - | 372570 | 372570 | -4974 | 892 | AN0271 |
| 739  | CONTIG5 | 372977 | 373331 | 2.17 | 2.12E-02 | transcription_start_site | - | 373231 | 373231 | 77    | 890 | AN0271 |
| 739  | CONTIG5 | 372977 | 373331 | 2.17 | 2.12E-02 | transcription_start_site | - | 372793 | 372793 | -361  | 891 | AN0271 |
| 739  | CONTIG5 | 372977 | 373331 | 2.17 | 2.12E-02 | transcription_start_site | - | 372570 | 372570 | -584  | 892 | AN0271 |
| 739  | CONTIG5 | 372977 | 373331 | 2.17 | 2.12E-02 | transcription_start_site | + | 373735 | 373735 | -581  | 893 | AN0272 |
| 739  | CONTIG5 | 372977 | 373331 | 2.17 | 2.12E-02 | transcription_start_site | + | 373901 | 373901 | -747  | 894 | AN0272 |
| 739  | CONTIG5 | 372977 | 373331 | 2.17 | 2.12E-02 | transcription_start_site | + | 374244 | 374244 | -1090 | 895 | AN0272 |
| 291  | CONTIG5 | 377402 | 377686 | 2.78 | 3.03E-03 | transcription_start_site | + | 379900 | 379900 | -2356 | 896 | AN0273 |
| 291  | CONTIG5 | 377402 | 377686 | 2.78 | 3.03E-03 | transcription_start_site | + | 381111 | 381111 | -3567 | 897 | AN0273 |
| 291  | CONTIG5 | 377402 | 377686 | 2.78 | 3.03E-03 | transcription_start_site | + | 381358 | 381358 | -3814 | 898 | AN0273 |
| 1472 | CONTIG5 | 380477 | 380752 | 1.61 | 1.08E-01 | transcription_start_site | + | 381111 | 381111 | -496  | 897 | AN0273 |
| 1472 | CONTIG5 | 380477 | 380752 | 1.61 | 1.08E-01 | transcription_start_site | + | 379900 | 379900 | 714   | 896 | AN0273 |
| 1472 | CONTIG5 | 380477 | 380752 | 1.61 | 1.08E-01 | transcription_start_site | + | 381358 | 381358 | -743  | 898 | AN0273 |
| 252  | CONTIG5 | 384244 | 384599 | 2.84 | 2.22E-03 | transcription_start_site | - | 383466 | 383466 | -955  | 899 | AN0274 |
| 252  | CONTIG5 | 384244 | 384599 | 2.84 | 2.22E-03 | transcription_start_site | - | 383302 | 383302 | -1119 | 900 | AN0274 |
| 252  | CONTIG5 | 384244 | 384599 | 2.84 | 2.22E-03 | transcription_start_site | - | 381944 | 381944 | -2477 | 901 | AN0274 |
| 252  | CONTIG5 | 384244 | 384599 | 2.84 | 2.22E-03 | transcription_start_site | + | 387154 | 387154 | -2732 | 906 | AN0276 |
| 252  | CONTIG5 | 384244 | 384599 | 2.84 | 2.22E-03 | transcription_start_site | + | 387358 | 387358 | -2936 | 907 | AN0276 |
| 252  | CONTIG5 | 384244 | 384599 | 2.84 | 2.22E-03 | transcription_start_site | + | 387774 | 387774 | -3352 | 908 | AN0276 |
| 46   | CONTIG5 | 402001 | 402508 | 3.45 | 2.67E-04 | transcription_start_site | - | 402316 | 402316 | 61    | 913 | AN0279 |
| 292  | CONTIG5 | 405751 | 406035 | 2.78 | 3.03E-03 | transcription_start_site | - | 402316 | 402316 | -3577 | 913 | AN0279 |
| 359  | CONTIG5 | 403731 | 404006 | 2.67 | 4.61E-03 | transcription_start_site | - | 402316 | 402316 | -1552 | 913 | AN0279 |
| 851  | CONTIG5 | 407121 | 407755 | 2.06 | 3.08E-02 | transcription_start_site | - | 402316 | 402316 | -5122 | 913 | AN0279 |
| 1473 | CONTIG5 | 406296 | 406940 | 1.61 | 1.08E-01 | transcription_start_site | - | 402316 | 402316 | -4302 | 913 | AN0279 |
| 1568 | CONTIG5 | 404786 | 405425 | 1.56 | 1.25E-01 | transcription_start_site | - | 402316 | 402316 | -2789 | 913 | AN0279 |
| 1569 | CONTIG5 | 420167 | 420426 | 1.56 | 1.25E-01 | transcription_start_site | - | 418871 | 418871 | -1425 | 919 | AN0282 |
| 1569 | CONTIG5 | 420167 | 420426 | 1.56 | 1.25E-01 | transcription_start_site | - | 418738 | 418738 | -1558 | 920 | AN0282 |
| 1569 | CONTIG5 | 420167 | 420426 | 1.56 | 1.25E-01 | transcription_start_site | - | 418527 | 418527 | -1769 | 921 | AN0282 |
| 1569 | CONTIG5 | 420167 | 420426 | 1.56 | 1.25E-01 | transcription_start_site | - | 418281 | 418281 | -2015 | 922 | AN0282 |
| 1569 | CONTIG5 | 420167 | 420426 | 1.56 | 1.25E-01 | transcription_start_site | - | 417045 | 417045 | -3251 | 923 | AN0282 |
| 1343 | CONTIG5 | 428480 | 428906 | 1.67 | 9.24E-02 | transcription_start_site | - | 428778 | 428778 | 85    | 924 | AN0283 |
| 1343 | CONTIG5 | 428480 | 428906 | 1.67 | 9.24E-02 | transcription_start_site | - | 428454 | 428454 | -239  | 925 | AN0283 |
| 1343 | CONTIG5 | 428480 | 428906 | 1.67 | 9.24E-02 | transcription_start_site | - | 428265 | 428265 | -428  | 926 | AN0283 |
| 1343 | CONTIG5 | 428480 | 428906 | 1.67 | 9.24E-02 | transcription_start_site | - | 428174 | 428174 | -519  | 927 | AN0283 |
| 1343 | CONTIG5 | 428480 | 428906 | 1.67 | 9.24E-02 | transcription_start_site | - | 427915 | 427915 | -778  | 928 | AN0283 |
| 1343 | CONTIG5 | 428480 | 428906 | 1.67 | 9.24E-02 | transcription_start_site | + | 432041 | 432041 | -3348 | 929 | AN0284 |
| 1343 | CONTIG5 | 428480 | 428906 | 1.67 | 9.24E-02 | transcription_start_site | + | 432553 | 432553 | -3860 | 930 | AN0284 |

|      |         |        |        |      |          |                          |   |        |        |       |      |        |
|------|---------|--------|--------|------|----------|--------------------------|---|--------|--------|-------|------|--------|
| 1343 | CONTIG5 | 428480 | 428906 | 1.67 | 9.24E-02 | transcription_start_site | + | 432972 | 432972 | -4279 | 931  | AN0284 |
| 1343 | CONTIG5 | 428480 | 428906 | 1.67 | 9.24E-02 | transcription_start_site | + | 433095 | 433095 | -4402 | 932  | AN0284 |
| 1343 | CONTIG5 | 428480 | 428906 | 1.67 | 9.24E-02 | transcription_start_site | + | 433320 | 433320 | -4627 | 933  | AN0284 |
| 1343 | CONTIG5 | 428480 | 428906 | 1.67 | 9.24E-02 | transcription_start_site | + | 433608 | 433608 | -4915 | 934  | AN0284 |
| 910  | CONTIG5 | 440266 | 440840 | 2    | 3.70E-02 | transcription_start_site | - | 437181 | 437181 | -3372 | 937  | AN0285 |
| 910  | CONTIG5 | 440266 | 440840 | 2    | 3.70E-02 | transcription_start_site | + | 441254 | 441254 | -701  | 940  | AN0287 |
| 910  | CONTIG5 | 440266 | 440840 | 2    | 3.70E-02 | transcription_start_site | + | 441506 | 441506 | -953  | 941  | AN0287 |
| 910  | CONTIG5 | 440266 | 440840 | 2    | 3.70E-02 | transcription_start_site | + | 444319 | 444319 | -3766 | 942  | AN0287 |
| 910  | CONTIG5 | 440266 | 440840 | 2    | 3.70E-02 | transcription_start_site | + | 444642 | 444642 | -4089 | 943  | AN0287 |
| 910  | CONTIG5 | 440266 | 440840 | 2    | 3.70E-02 | transcription_start_site | + | 444840 | 444840 | -4287 | 944  | AN0287 |
| 1814 | CONTIG5 | 447905 | 448719 | 1.45 | 1.50E-01 | transcription_start_site | + | 448077 | 448077 | 235   | 946  | AN0288 |
| 2257 | CONTIG6 | 3761   | 4035   | 1.28 | 9.24E-02 | transcription_start_site | + | 3961   | 3961   | -63   | 949  | AN0290 |
| 2257 | CONTIG6 | 3761   | 4035   | 1.28 | 9.24E-02 | transcription_start_site | + | 3809   | 3809   | 89    | 948  | AN0290 |
| 2257 | CONTIG6 | 3761   | 4035   | 1.28 | 9.24E-02 | transcription_start_site | + | 4403   | 4403   | -505  | 950  | AN0290 |
| 2257 | CONTIG6 | 3761   | 4035   | 1.28 | 9.24E-02 | transcription_start_site | + | 4731   | 4731   | -833  | 951  | AN0290 |
| 2257 | CONTIG6 | 3761   | 4035   | 1.28 | 9.24E-02 | transcription_start_site | + | 4831   | 4831   | -933  | 952  | AN0290 |
| 2257 | CONTIG6 | 3761   | 4035   | 1.28 | 9.24E-02 | transcription_start_site | + | 6869   | 6869   | -2971 | 955  | AN0292 |
| 2257 | CONTIG6 | 3761   | 4035   | 1.28 | 9.24E-02 | transcription_start_site | + | 7682   | 7682   | -3784 | 956  | AN0292 |
| 1593 | CONTIG6 | 17782  | 18066  | 1.54 | 3.70E-02 | transcription_start_site | - | 15232  | 15232  | -2692 | 964  | AN0295 |
| 1593 | CONTIG6 | 17782  | 18066  | 1.54 | 3.70E-02 | transcription_start_site | - | 15061  | 15061  | -2863 | 965  | AN0295 |
| 1593 | CONTIG6 | 17782  | 18066  | 1.54 | 3.70E-02 | transcription_start_site | - | 14879  | 14879  | -3045 | 966  | AN0295 |
| 1593 | CONTIG6 | 17782  | 18066  | 1.54 | 3.70E-02 | transcription_start_site | - | 13345  | 13345  | -4579 | 967  | AN0295 |
| 1593 | CONTIG6 | 17782  | 18066  | 1.54 | 3.70E-02 | transcription_start_site | - | 17537  | 17537  | -387  | 969  | AN0297 |
| 1593 | CONTIG6 | 17782  | 18066  | 1.54 | 3.70E-02 | transcription_start_site | - | 17440  | 17440  | -484  | 970  | AN0297 |
| 1593 | CONTIG6 | 17782  | 18066  | 1.54 | 3.70E-02 | transcription_start_site | - | 17090  | 17090  | -834  | 971  | AN0297 |
| 1593 | CONTIG6 | 17782  | 18066  | 1.54 | 3.70E-02 | transcription_start_site | - | 16846  | 16846  | -1078 | 972  | AN0297 |
| 1809 | CONTIG6 | 24019  | 24278  | 1.45 | 5.22E-02 | transcription_start_site | - | 19680  | 19680  | -4468 | 973  | AN0298 |
| 1593 | CONTIG6 | 17782  | 18066  | 1.54 | 3.70E-02 | transcription_start_site | + | 21358  | 21358  | -3434 | 974  | AN0299 |
| 1593 | CONTIG6 | 17782  | 18066  | 1.54 | 3.70E-02 | transcription_start_site | + | 21627  | 21627  | -3703 | 975  | AN0299 |
| 1593 | CONTIG6 | 17782  | 18066  | 1.54 | 3.70E-02 | transcription_start_site | + | 21720  | 21720  | -3796 | 976  | AN0299 |
| 1593 | CONTIG6 | 17782  | 18066  | 1.54 | 3.70E-02 | transcription_start_site | + | 22003  | 22003  | -4079 | 977  | AN0299 |
| 374  | CONTIG6 | 27544  | 27818  | 2.65 | 2.67E-04 | transcription_start_site | - | 24598  | 24598  | -3083 | 978  | AN0300 |
| 374  | CONTIG6 | 27544  | 27818  | 2.65 | 2.67E-04 | transcription_start_site | - | 24340  | 24340  | -3341 | 979  | AN0300 |
| 1809 | CONTIG6 | 24019  | 24278  | 1.45 | 5.22E-02 | transcription_start_site | - | 24340  | 24340  | 191   | 979  | AN0300 |
| 1809 | CONTIG6 | 24019  | 24278  | 1.45 | 5.22E-02 | transcription_start_site | - | 24598  | 24598  | 449   | 978  | AN0300 |
| 374  | CONTIG6 | 27544  | 27818  | 2.65 | 2.67E-04 | transcription_start_site | - | 26380  | 26380  | -1301 | 980  | AN0301 |
| 374  | CONTIG6 | 27544  | 27818  | 2.65 | 2.67E-04 | transcription_start_site | - | 26175  | 26175  | -1506 | 981  | AN0301 |
| 374  | CONTIG6 | 27544  | 27818  | 2.65 | 2.67E-04 | transcription_start_site | - | 25706  | 25706  | -1975 | 982  | AN0301 |
| 374  | CONTIG6 | 27544  | 27818  | 2.65 | 2.67E-04 | transcription_start_site | - | 25527  | 25527  | -2154 | 983  | AN0301 |
| 986  | CONTIG6 | 32254  | 32528  | 1.92 | 7.85E-03 | transcription_start_site | - | 31222  | 31222  | -1169 | 984  | AN0302 |
| 986  | CONTIG6 | 32254  | 32528  | 1.92 | 7.85E-03 | transcription_start_site | - | 29119  | 29119  | -3272 | 985  | AN0302 |
| 2732 | CONTIG6 | 38109  | 38378  | 1.11 | 1.66E-01 | transcription_start_site | - | 34649  | 34649  | -3594 | 986  | AN0303 |
| 2732 | CONTIG6 | 38109  | 38378  | 1.11 | 1.66E-01 | transcription_start_site | - | 34553  | 34553  | -3690 | 987  | AN0303 |
| 2732 | CONTIG6 | 38109  | 38378  | 1.11 | 1.66E-01 | transcription_start_site | - | 34151  | 34151  | -4092 | 988  | AN0303 |
| 2732 | CONTIG6 | 38109  | 38378  | 1.11 | 1.66E-01 | transcription_start_site | - | 33934  | 33934  | -4309 | 989  | AN0303 |
| 986  | CONTIG6 | 32254  | 32528  | 1.92 | 7.85E-03 | transcription_start_site | + | 35457  | 35457  | -3066 | 990  | AN0304 |
| 986  | CONTIG6 | 32254  | 32528  | 1.92 | 7.85E-03 | transcription_start_site | + | 35793  | 35793  | -3402 | 991  | AN0304 |
| 986  | CONTIG6 | 32254  | 32528  | 1.92 | 7.85E-03 | transcription_start_site | + | 36396  | 36396  | -4005 | 992  | AN0304 |
| 2732 | CONTIG6 | 38109  | 38378  | 1.11 | 1.66E-01 | transcription_start_site | + | 41011  | 41011  | -2767 | 996  | AN0306 |
| 2732 | CONTIG6 | 38109  | 38378  | 1.11 | 1.66E-01 | transcription_start_site | + | 41146  | 41146  | -2902 | 997  | AN0306 |
| 2732 | CONTIG6 | 38109  | 38378  | 1.11 | 1.66E-01 | transcription_start_site | + | 41868  | 41868  | -3624 | 998  | AN0306 |
| 2732 | CONTIG6 | 38109  | 38378  | 1.11 | 1.66E-01 | transcription_start_site | + | 42020  | 42020  | -3776 | 999  | AN0306 |
| 2732 | CONTIG6 | 38109  | 38378  | 1.11 | 1.66E-01 | transcription_start_site | + | 42120  | 42120  | -3876 | 1000 | AN0306 |
| 343  | CONTIG6 | 55513  | 55867  | 2.69 | 0.00E+00 | transcription_start_site | - | 51985  | 51985  | -3705 | 1003 | AN0309 |
| 343  | CONTIG6 | 55513  | 55867  | 2.69 | 0.00E+00 | transcription_start_site | - | 51888  | 51888  | -3802 | 1004 | AN0309 |
| 2258 | CONTIG6 | 53268  | 53607  | 1.28 | 9.24E-02 | transcription_start_site | - | 51985  | 51985  | -1452 | 1003 | AN0309 |
| 2258 | CONTIG6 | 53268  | 53607  | 1.28 | 9.24E-02 | transcription_start_site | - | 51888  | 51888  | -1549 | 1004 | AN0309 |

|              |        |        |      |          |                          |   |        |        |       |             |
|--------------|--------|--------|------|----------|--------------------------|---|--------|--------|-------|-------------|
| 2258 CONTIG6 | 53268  | 53607  | 1.28 | 9.24E-02 | transcription_start_site | + | 52639  | 52639  | 798   | 1006 AN0310 |
| 2258 CONTIG6 | 53268  | 53607  | 1.28 | 9.24E-02 | transcription_start_site | + | 52334  | 52334  | 1103  | 1005 AN0310 |
| 343 CONTIG6  | 55513  | 55867  | 2.69 | 0.00E+00 | transcription_start_site | + | 56422  | 56422  | -732  | 1007 AN0311 |
| 2258 CONTIG6 | 53268  | 53607  | 1.28 | 9.24E-02 | transcription_start_site | + | 56422  | 56422  | -2984 | 1007 AN0311 |
| 343 CONTIG6  | 55513  | 55867  | 2.69 | 0.00E+00 | transcription_start_site | + | 58110  | 58110  | -2420 | 1008 AN0312 |
| 2258 CONTIG6 | 53268  | 53607  | 1.28 | 9.24E-02 | transcription_start_site | + | 58110  | 58110  | -4672 | 1008 AN0312 |
| 1153 CONTIG6 | 61804  | 62394  | 1.79 | 4.13E-03 | transcription_start_site | - | 61540  | 61540  | -559  | 1009 AN0313 |
| 1153 CONTIG6 | 61804  | 62394  | 1.79 | 4.13E-03 | transcription_start_site | + | 62425  | 62425  | -326  | 1010 AN0314 |
| 2635 CONTIG6 | 59333  | 59612  | 1.15 | 1.44E-01 | transcription_start_site | + | 62425  | 62425  | -2952 | 1010 AN0314 |
| 2135 CONTIG6 | 66920  | 67259  | 1.32 | 8.01E-02 | transcription_start_site | - | 66575  | 66575  | -514  | 1011 AN0315 |
| 2135 CONTIG6 | 66920  | 67259  | 1.32 | 8.01E-02 | transcription_start_site | - | 66223  | 66223  | -866  | 1012 AN0315 |
| 2376 CONTIG6 | 71180  | 71469  | 1.24 | 1.08E-01 | transcription_start_site | - | 66575  | 66575  | -4749 | 1011 AN0315 |
| 2376 CONTIG6 | 71180  | 71469  | 1.24 | 1.08E-01 | transcription_start_site | - | 66223  | 66223  | -5101 | 1012 AN0315 |
| 1153 CONTIG6 | 61804  | 62394  | 1.79 | 4.13E-03 | transcription_start_site | + | 67386  | 67386  | -5287 | 1013 AN0316 |
| 2135 CONTIG6 | 66920  | 67259  | 1.32 | 8.01E-02 | transcription_start_site | + | 67386  | 67386  | -296  | 1013 AN0316 |
| 2135 CONTIG6 | 66920  | 67259  | 1.32 | 8.01E-02 | transcription_start_site | + | 67474  | 67474  | -384  | 1014 AN0316 |
| 2135 CONTIG6 | 66920  | 67259  | 1.32 | 8.01E-02 | transcription_start_site | + | 67622  | 67622  | -532  | 1015 AN0316 |
| 2135 CONTIG6 | 66920  | 67259  | 1.32 | 8.01E-02 | transcription_start_site | + | 67755  | 67755  | -665  | 1016 AN0316 |
| 2135 CONTIG6 | 66920  | 67259  | 1.32 | 8.01E-02 | transcription_start_site | + | 67900  | 67900  | -810  | 1017 AN0316 |
| 2135 CONTIG6 | 66920  | 67259  | 1.32 | 8.01E-02 | transcription_start_site | + | 68911  | 68911  | -1821 | 1018 AN0316 |
| 2135 CONTIG6 | 66920  | 67259  | 1.32 | 8.01E-02 | transcription_start_site | + | 69872  | 69872  | -2782 | 1019 AN0317 |
| 2135 CONTIG6 | 66920  | 67259  | 1.32 | 8.01E-02 | transcription_start_site | + | 70003  | 70003  | -2913 | 1020 AN0317 |
| 2135 CONTIG6 | 66920  | 67259  | 1.32 | 8.01E-02 | transcription_start_site | + | 70233  | 70233  | -3143 | 1021 AN0317 |
| 2135 CONTIG6 | 66920  | 67259  | 1.32 | 8.01E-02 | transcription_start_site | + | 70477  | 70477  | -3387 | 1022 AN0317 |
| 2135 CONTIG6 | 66920  | 67259  | 1.32 | 8.01E-02 | transcription_start_site | + | 70694  | 70694  | -3604 | 1023 AN0317 |
| 2376 CONTIG6 | 71180  | 71469  | 1.24 | 1.08E-01 | transcription_start_site | + | 70694  | 70694  | 630   | 1023 AN0317 |
| 2376 CONTIG6 | 71180  | 71469  | 1.24 | 1.08E-01 | transcription_start_site | + | 70477  | 70477  | 847   | 1022 AN0317 |
| 2376 CONTIG6 | 71180  | 71469  | 1.24 | 1.08E-01 | transcription_start_site | + | 70233  | 70233  | 1091  | 1021 AN0317 |
| 2376 CONTIG6 | 71180  | 71469  | 1.24 | 1.08E-01 | transcription_start_site | + | 74054  | 74054  | -2729 | 1024 AN0317 |
| 1717 CONTIG6 | 106880 | 107304 | 1.49 | 4.36E-02 | transcription_start_site | - | 104606 | 104606 | -2486 | 1042 AN0323 |
| 1717 CONTIG6 | 106880 | 107304 | 1.49 | 4.36E-02 | transcription_start_site | + | 107815 | 107815 | -723  | 1043 AN0324 |
| 1717 CONTIG6 | 106880 | 107304 | 1.49 | 4.36E-02 | transcription_start_site | + | 107930 | 107930 | -838  | 1044 AN0324 |
| 1717 CONTIG6 | 106880 | 107304 | 1.49 | 4.36E-02 | transcription_start_site | + | 109711 | 109711 | -2619 | 1045 AN0325 |
| 1717 CONTIG6 | 106880 | 107304 | 1.49 | 4.36E-02 | transcription_start_site | + | 109951 | 109951 | -2859 | 1046 AN0325 |
| 1717 CONTIG6 | 106880 | 107304 | 1.49 | 4.36E-02 | transcription_start_site | + | 110081 | 110081 | -2989 | 1047 AN0325 |
| 1717 CONTIG6 | 106880 | 107304 | 1.49 | 4.36E-02 | transcription_start_site | + | 110317 | 110317 | -3225 | 1048 AN0325 |
| 1717 CONTIG6 | 106880 | 107304 | 1.49 | 4.36E-02 | transcription_start_site | + | 110580 | 110580 | -3488 | 1049 AN0325 |
| 1717 CONTIG6 | 106880 | 107304 | 1.49 | 4.36E-02 | transcription_start_site | + | 110969 | 110969 | -3877 | 1050 AN0325 |
| 2259 CONTIG6 | 120467 | 121556 | 1.28 | 9.24E-02 | transcription_start_site | - | 116981 | 116981 | -4030 | 1055 AN0328 |
| 1352 CONTIG6 | 126467 | 126816 | 1.66 | 2.12E-02 | transcription_start_site | - | 121609 | 121609 | -5032 | 1061 AN0330 |
| 2259 CONTIG6 | 120467 | 121556 | 1.28 | 9.24E-02 | transcription_start_site | - | 121609 | 121609 | 597   | 1061 AN0330 |
| 1352 CONTIG6 | 126467 | 126816 | 1.66 | 2.12E-02 | transcription_start_site | - | 122692 | 122692 | -3949 | 1062 AN0331 |
| 1352 CONTIG6 | 126467 | 126816 | 1.66 | 2.12E-02 | transcription_start_site | - | 122503 | 122503 | -4138 | 1063 AN0331 |
| 1352 CONTIG6 | 126467 | 126816 | 1.66 | 2.12E-02 | transcription_start_site | - | 122349 | 122349 | -4292 | 1064 AN0331 |
| 2259 CONTIG6 | 120467 | 121556 | 1.28 | 9.24E-02 | transcription_start_site | - | 122349 | 122349 | 1337  | 1064 AN0331 |
| 2259 CONTIG6 | 120467 | 121556 | 1.28 | 9.24E-02 | transcription_start_site | - | 122503 | 122503 | 1491  | 1063 AN0331 |
| 1352 CONTIG6 | 126467 | 126816 | 1.66 | 2.12E-02 | transcription_start_site | - | 125370 | 125370 | -1271 | 1065 AN0332 |
| 1352 CONTIG6 | 126467 | 126816 | 1.66 | 2.12E-02 | transcription_start_site | - | 125046 | 125046 | -1595 | 1066 AN0332 |
| 1352 CONTIG6 | 126467 | 126816 | 1.66 | 2.12E-02 | transcription_start_site | - | 124665 | 124665 | -1976 | 1067 AN0332 |
| 1352 CONTIG6 | 126467 | 126816 | 1.66 | 2.12E-02 | transcription_start_site | - | 124449 | 124449 | -2192 | 1068 AN0332 |
| 1352 CONTIG6 | 126467 | 126816 | 1.66 | 2.12E-02 | transcription_start_site | - | 123721 | 123721 | -2920 | 1069 AN0332 |
| 1352 CONTIG6 | 126467 | 126816 | 1.66 | 2.12E-02 | transcription_start_site | + | 127333 | 127333 | -691  | 1070 AN0333 |
| 1352 CONTIG6 | 126467 | 126816 | 1.66 | 2.12E-02 | transcription_start_site | + | 127688 | 127688 | -1046 | 1071 AN0333 |
| 1352 CONTIG6 | 126467 | 126816 | 1.66 | 2.12E-02 | transcription_start_site | + | 128045 | 128045 | -1403 | 1072 AN0333 |
| 1352 CONTIG6 | 126467 | 126816 | 1.66 | 2.12E-02 | transcription_start_site | + | 128199 | 128199 | -1557 | 1073 AN0333 |
| 1106 CONTIG6 | 146493 | 146832 | 1.83 | 1.11E-02 | transcription_start_site | - | 142068 | 142068 | -4594 | 1085 AN0338 |
| 1106 CONTIG6 | 146493 | 146832 | 1.83 | 1.11E-02 | transcription_start_site | - | 141761 | 141761 | -4901 | 1086 AN0338 |

|      |         |        |        |      |          |                          |   |        |        |       |      |        |
|------|---------|--------|--------|------|----------|--------------------------|---|--------|--------|-------|------|--------|
| 1106 | CONTIG6 | 146493 | 146832 | 1.83 | 1.11E-02 | transcription_start_site | - | 146405 | 146405 | -257  | 1094 | AN0339 |
| 1106 | CONTIG6 | 146493 | 146832 | 1.83 | 1.11E-02 | transcription_start_site | - | 144008 | 144008 | -2654 | 1095 | AN0339 |
| 1106 | CONTIG6 | 146493 | 146832 | 1.83 | 1.11E-02 | transcription_start_site | - | 143720 | 143720 | -2942 | 1096 | AN0339 |
| 1106 | CONTIG6 | 146493 | 146832 | 1.83 | 1.11E-02 | transcription_start_site | + | 147198 | 147198 | -535  | 1097 | AN0340 |
| 1106 | CONTIG6 | 146493 | 146832 | 1.83 | 1.11E-02 | transcription_start_site | + | 147896 | 147896 | -1233 | 1098 | AN0340 |
| 2799 | CONTIG6 | 175746 | 176170 | 1.07 | 1.93E-01 | transcription_start_site | - | 172233 | 172233 | -3725 | 1119 | AN0349 |
| 2799 | CONTIG6 | 175746 | 176170 | 1.07 | 1.93E-01 | transcription_start_site | - | 171681 | 171681 | -4277 | 1120 | AN0349 |
| 2799 | CONTIG6 | 175746 | 176170 | 1.07 | 1.93E-01 | transcription_start_site | - | 173521 | 173521 | -2437 | 1121 | AN0350 |
| 2799 | CONTIG6 | 175746 | 176170 | 1.07 | 1.93E-01 | transcription_start_site | - | 173471 | 173471 | -2487 | 1122 | AN0350 |
| 2799 | CONTIG6 | 175746 | 176170 | 1.07 | 1.93E-01 | transcription_start_site | + | 175507 | 175507 | 451   | 1125 | AN0351 |
| 238  | CONTIG6 | 184804 | 185093 | 2.86 | 0.00E+00 | transcription_start_site | + | 185614 | 185614 | -665  | 1126 | AN0353 |
| 238  | CONTIG6 | 184804 | 185093 | 2.86 | 0.00E+00 | transcription_start_site | + | 186068 | 186068 | -1119 | 1127 | AN0353 |
| 2260 | CONTIG6 | 185114 | 185753 | 1.28 | 9.24E-02 | transcription_start_site | + | 185614 | 185614 | -180  | 1126 | AN0353 |
| 2260 | CONTIG6 | 185114 | 185753 | 1.28 | 9.24E-02 | transcription_start_site | + | 186068 | 186068 | -634  | 1127 | AN0353 |
| 2730 | CONTIG6 | 194946 | 195357 | 1.11 | 1.50E-01 | transcription_start_site | - | 190006 | 190006 | -5145 | 1128 | AN0354 |
| 2730 | CONTIG6 | 194946 | 195357 | 1.11 | 1.50E-01 | transcription_start_site | - | 189947 | 189947 | -5204 | 1129 | AN0354 |
| 1810 | CONTIG6 | 198021 | 198275 | 1.45 | 5.22E-02 | transcription_start_site | - | 193155 | 193155 | -4993 | 1132 | AN0355 |
| 2730 | CONTIG6 | 194946 | 195357 | 1.11 | 1.50E-01 | transcription_start_site | - | 193155 | 193155 | -1996 | 1132 | AN0355 |
| 2730 | CONTIG6 | 194946 | 195357 | 1.11 | 1.50E-01 | transcription_start_site | - | 190709 | 190709 | -4442 | 1133 | AN0355 |
| 2730 | CONTIG6 | 194946 | 195357 | 1.11 | 1.50E-01 | transcription_start_site | + | 195290 | 195290 | -138  | 1134 | AN0356 |
| 1810 | CONTIG6 | 198021 | 198275 | 1.45 | 5.22E-02 | transcription_start_site | - | 198199 | 198199 | 51    | 1135 | AN0357 |
| 1810 | CONTIG6 | 198021 | 198275 | 1.45 | 5.22E-02 | transcription_start_site | - | 198014 | 198014 | -134  | 1136 | AN0357 |
| 1810 | CONTIG6 | 198021 | 198275 | 1.45 | 5.22E-02 | transcription_start_site | - | 197753 | 197753 | -395  | 1137 | AN0357 |
| 1810 | CONTIG6 | 198021 | 198275 | 1.45 | 5.22E-02 | transcription_start_site | - | 197625 | 197625 | -523  | 1138 | AN0357 |
| 1810 | CONTIG6 | 198021 | 198275 | 1.45 | 5.22E-02 | transcription_start_site | - | 197173 | 197173 | -975  | 1139 | AN0357 |
| 987  | CONTIG6 | 208818 | 209157 | 1.92 | 7.85E-03 | transcription_start_site | - | 206309 | 206309 | -2678 | 1140 | AN0359 |
| 987  | CONTIG6 | 208818 | 209157 | 1.92 | 7.85E-03 | transcription_start_site | - | 206164 | 206164 | -2823 | 1141 | AN0359 |
| 987  | CONTIG6 | 208818 | 209157 | 1.92 | 7.85E-03 | transcription_start_site | - | 205900 | 205900 | -3087 | 1142 | AN0359 |
| 987  | CONTIG6 | 208818 | 209157 | 1.92 | 7.85E-03 | transcription_start_site | - | 204322 | 204322 | -4665 | 1143 | AN0359 |
| 2377 | CONTIG6 | 210528 | 211332 | 1.24 | 1.08E-01 | transcription_start_site | - | 206309 | 206309 | -4621 | 1140 | AN0359 |
| 2377 | CONTIG6 | 210528 | 211332 | 1.24 | 1.08E-01 | transcription_start_site | - | 206164 | 206164 | -4766 | 1141 | AN0359 |
| 2377 | CONTIG6 | 210528 | 211332 | 1.24 | 1.08E-01 | transcription_start_site | - | 205900 | 205900 | -5030 | 1142 | AN0359 |
| 987  | CONTIG6 | 208818 | 209157 | 1.92 | 7.85E-03 | transcription_start_site | + | 208130 | 208130 | 857   | 1148 | AN0360 |
| 987  | CONTIG6 | 208818 | 209157 | 1.92 | 7.85E-03 | transcription_start_site | + | 208016 | 208016 | 971   | 1147 | AN0360 |
| 370  | CONTIG6 | 217968 | 218612 | 2.65 | 0.00E+00 | transcription_start_site | - | 214975 | 214975 | -3315 | 1149 | AN0362 |
| 370  | CONTIG6 | 217968 | 218612 | 2.65 | 0.00E+00 | transcription_start_site | - | 214657 | 214657 | -3633 | 1150 | AN0362 |
| 1154 | CONTIG6 | 218720 | 219519 | 1.79 | 4.13E-03 | transcription_start_site | - | 214975 | 214975 | -4144 | 1149 | AN0362 |
| 1154 | CONTIG6 | 218720 | 219519 | 1.79 | 4.13E-03 | transcription_start_site | - | 214657 | 214657 | -4462 | 1150 | AN0362 |
| 370  | CONTIG6 | 217968 | 218612 | 2.65 | 0.00E+00 | transcription_start_site | - | 217321 | 217321 | -969  | 1151 | AN0363 |
| 370  | CONTIG6 | 217968 | 218612 | 2.65 | 0.00E+00 | transcription_start_site | - | 217035 | 217035 | -1255 | 1152 | AN0363 |
| 370  | CONTIG6 | 217968 | 218612 | 2.65 | 0.00E+00 | transcription_start_site | - | 216902 | 216902 | -1388 | 1153 | AN0363 |
| 370  | CONTIG6 | 217968 | 218612 | 2.65 | 0.00E+00 | transcription_start_site | - | 216340 | 216340 | -1950 | 1154 | AN0363 |
| 1154 | CONTIG6 | 218720 | 219519 | 1.79 | 4.13E-03 | transcription_start_site | - | 217321 | 217321 | -1798 | 1151 | AN0363 |
| 1154 | CONTIG6 | 218720 | 219519 | 1.79 | 4.13E-03 | transcription_start_site | - | 217035 | 217035 | -2084 | 1152 | AN0363 |
| 1154 | CONTIG6 | 218720 | 219519 | 1.79 | 4.13E-03 | transcription_start_site | - | 216902 | 216902 | -2217 | 1153 | AN0363 |
| 1154 | CONTIG6 | 218720 | 219519 | 1.79 | 4.13E-03 | transcription_start_site | - | 216340 | 216340 | -2779 | 1154 | AN0363 |
| 1902 | CONTIG6 | 221263 | 221537 | 1.41 | 5.88E-02 | transcription_start_site | - | 217321 | 217321 | -4079 | 1151 | AN0363 |
| 1902 | CONTIG6 | 221263 | 221537 | 1.41 | 5.88E-02 | transcription_start_site | - | 217035 | 217035 | -4365 | 1152 | AN0363 |
| 1902 | CONTIG6 | 221263 | 221537 | 1.41 | 5.88E-02 | transcription_start_site | - | 216902 | 216902 | -4498 | 1153 | AN0363 |
| 1902 | CONTIG6 | 221263 | 221537 | 1.41 | 5.88E-02 | transcription_start_site | - | 216340 | 216340 | -5060 | 1154 | AN0363 |
| 370  | CONTIG6 | 217968 | 218612 | 2.65 | 0.00E+00 | transcription_start_site | + | 222001 | 222001 | -3711 | 1155 | AN0364 |
| 370  | CONTIG6 | 217968 | 218612 | 2.65 | 0.00E+00 | transcription_start_site | + | 222225 | 222225 | -3935 | 1156 | AN0364 |
| 1154 | CONTIG6 | 218720 | 219519 | 1.79 | 4.13E-03 | transcription_start_site | + | 222001 | 222001 | -2881 | 1155 | AN0364 |
| 1154 | CONTIG6 | 218720 | 219519 | 1.79 | 4.13E-03 | transcription_start_site | + | 222225 | 222225 | -3105 | 1156 | AN0364 |
| 1902 | CONTIG6 | 221263 | 221537 | 1.41 | 5.88E-02 | transcription_start_site | + | 222001 | 222001 | -601  | 1155 | AN0364 |
| 1902 | CONTIG6 | 221263 | 221537 | 1.41 | 5.88E-02 | transcription_start_site | + | 222225 | 222225 | -825  | 1156 | AN0364 |
| 1594 | CONTIG6 | 230478 | 231057 | 1.54 | 3.70E-02 | transcription_start_site | - | 228027 | 228027 | -2740 | 1160 | AN0366 |

|              |        |        |      |          |                          |   |        |        |       |             |
|--------------|--------|--------|------|----------|--------------------------|---|--------|--------|-------|-------------|
| 1594 CONTIG6 | 230478 | 231057 | 1.54 | 3.70E-02 | transcription_start_site | - | 227844 | 227844 | -2923 | 1161 AN0366 |
| 1594 CONTIG6 | 230478 | 231057 | 1.54 | 3.70E-02 | transcription_start_site | - | 227578 | 227578 | -3189 | 1162 AN0366 |
| 1594 CONTIG6 | 230478 | 231057 | 1.54 | 3.70E-02 | transcription_start_site | - | 230262 | 230262 | -505  | 1163 AN0367 |
| 1594 CONTIG6 | 230478 | 231057 | 1.54 | 3.70E-02 | transcription_start_site | + | 232725 | 232725 | -1957 | 1164 AN0368 |
| 1594 CONTIG6 | 230478 | 231057 | 1.54 | 3.70E-02 | transcription_start_site | + | 233145 | 233145 | -2377 | 1165 AN0368 |
| 1594 CONTIG6 | 230478 | 231057 | 1.54 | 3.70E-02 | transcription_start_site | + | 235450 | 235450 | -4682 | 1166 AN0368 |
| 2531 CONTIG6 | 244884 | 245228 | 1.19 | 1.25E-01 | transcription_start_site | - | 244851 | 244851 | -205  | 1178 AN0372 |
| 2531 CONTIG6 | 244884 | 245228 | 1.19 | 1.25E-01 | transcription_start_site | - | 244723 | 244723 | -333  | 1179 AN0372 |
| 2531 CONTIG6 | 244884 | 245228 | 1.19 | 1.25E-01 | transcription_start_site | - | 244622 | 244622 | -434  | 1180 AN0372 |
| 2531 CONTIG6 | 244884 | 245228 | 1.19 | 1.25E-01 | transcription_start_site | - | 244540 | 244540 | -516  | 1181 AN0372 |
| 2531 CONTIG6 | 244884 | 245228 | 1.19 | 1.25E-01 | transcription_start_site | - | 244295 | 244295 | -761  | 1182 AN0372 |
| 2531 CONTIG6 | 244884 | 245228 | 1.19 | 1.25E-01 | transcription_start_site | - | 244190 | 244190 | -866  | 1183 AN0372 |
| 2531 CONTIG6 | 244884 | 245228 | 1.19 | 1.25E-01 | transcription_start_site | - | 243982 | 243982 | -1074 | 1184 AN0372 |
| 540 CONTIG7  | 3226   | 3595   | 2.39 | 1.01E-03 | transcription_start_site | - | 2045   | 2045   | -1365 | 1197 AN0377 |
| 540 CONTIG7  | 3226   | 3595   | 2.39 | 1.01E-03 | transcription_start_site | - | 1460   | 1460   | -1950 | 1198 AN0377 |
| 1521 CONTIG7 | 6921   | 7260   | 1.57 | 3.70E-02 | transcription_start_site | - | 2045   | 2045   | -5045 | 1197 AN0377 |
| 540 CONTIG7  | 3226   | 3595   | 2.39 | 1.01E-03 | transcription_start_site | + | 2537   | 2537   | 873   | 1200 AN0378 |
| 540 CONTIG7  | 3226   | 3595   | 2.39 | 1.01E-03 | transcription_start_site | + | 2372   | 2372   | 1038  | 1199 AN0378 |
| 540 CONTIG7  | 3226   | 3595   | 2.39 | 1.01E-03 | transcription_start_site | + | 4189   | 4189   | -778  | 1201 AN0379 |
| 540 CONTIG7  | 3226   | 3595   | 2.39 | 1.01E-03 | transcription_start_site | + | 4806   | 4806   | -1395 | 1202 AN0379 |
| 1521 CONTIG7 | 6921   | 7260   | 1.57 | 3.70E-02 | transcription_start_site | - | 7042   | 7042   | -48   | 1205 AN0380 |
| 1521 CONTIG7 | 6921   | 7260   | 1.57 | 3.70E-02 | transcription_start_site | - | 7463   | 7463   | 372   | 1204 AN0380 |
| 1521 CONTIG7 | 6921   | 7260   | 1.57 | 3.70E-02 | transcription_start_site | - | 7587   | 7587   | 496   | 1203 AN0380 |
| 540 CONTIG7  | 3226   | 3595   | 2.39 | 1.01E-03 | transcription_start_site | + | 7815   | 7815   | -4404 | 1206 AN0381 |
| 540 CONTIG7  | 3226   | 3595   | 2.39 | 1.01E-03 | transcription_start_site | + | 7872   | 7872   | -4461 | 1207 AN0381 |
| 540 CONTIG7  | 3226   | 3595   | 2.39 | 1.01E-03 | transcription_start_site | + | 8080   | 8080   | -4669 | 1208 AN0381 |
| 1521 CONTIG7 | 6921   | 7260   | 1.57 | 3.70E-02 | transcription_start_site | + | 7815   | 7815   | -724  | 1206 AN0381 |
| 1521 CONTIG7 | 6921   | 7260   | 1.57 | 3.70E-02 | transcription_start_site | + | 7872   | 7872   | -781  | 1207 AN0381 |
| 1521 CONTIG7 | 6921   | 7260   | 1.57 | 3.70E-02 | transcription_start_site | + | 8080   | 8080   | -989  | 1208 AN0381 |
| 1521 CONTIG7 | 6921   | 7260   | 1.57 | 3.70E-02 | transcription_start_site | + | 9505   | 9505   | -2414 | 1209 AN0381 |
| 2437 CONTIG7 | 24021  | 24280  | 1.22 | 1.25E-01 | transcription_start_site | - | 19333  | 19333  | -4817 | 1221 AN0385 |
| 2437 CONTIG7 | 24021  | 24280  | 1.22 | 1.25E-01 | transcription_start_site | - | 19186  | 19186  | -4964 | 1222 AN0385 |
| 2437 CONTIG7 | 24021  | 24280  | 1.22 | 1.25E-01 | transcription_start_site | - | 20898  | 20898  | -3252 | 1223 AN0386 |
| 2437 CONTIG7 | 24021  | 24280  | 1.22 | 1.25E-01 | transcription_start_site | + | 23984  | 23984  | 166   | 1226 AN0388 |
| 2437 CONTIG7 | 24021  | 24280  | 1.22 | 1.25E-01 | transcription_start_site | + | 24809  | 24809  | -658  | 1227 AN0388 |
| 1001 CONTIG7 | 26486  | 26920  | 1.91 | 8.81E-03 | transcription_start_site | + | 27656  | 27656  | -953  | 1228 AN0389 |
| 1288 CONTIG7 | 27990  | 28269  | 1.7  | 2.12E-02 | transcription_start_site | + | 27656  | 27656  | 473   | 1228 AN0389 |
| 2437 CONTIG7 | 24021  | 24280  | 1.22 | 1.25E-01 | transcription_start_site | + | 27656  | 27656  | -3505 | 1228 AN0389 |
| 811 CONTIG7  | 30827  | 31201  | 2.09 | 4.61E-03 | transcription_start_site | + | 30528  | 30528  | 486   | 1231 AN0390 |
| 811 CONTIG7  | 30827  | 31201  | 2.09 | 4.61E-03 | transcription_start_site | + | 30180  | 30180  | 834   | 1230 AN0390 |
| 1001 CONTIG7 | 26486  | 26920  | 1.91 | 8.81E-03 | transcription_start_site | + | 29574  | 29574  | -2871 | 1229 AN0390 |
| 1001 CONTIG7 | 26486  | 26920  | 1.91 | 8.81E-03 | transcription_start_site | + | 30180  | 30180  | -3477 | 1230 AN0390 |
| 1001 CONTIG7 | 26486  | 26920  | 1.91 | 8.81E-03 | transcription_start_site | + | 30528  | 30528  | -3825 | 1231 AN0390 |
| 1288 CONTIG7 | 27990  | 28269  | 1.7  | 2.12E-02 | transcription_start_site | + | 29574  | 29574  | -1444 | 1229 AN0390 |
| 1288 CONTIG7 | 27990  | 28269  | 1.7  | 2.12E-02 | transcription_start_site | + | 30180  | 30180  | -2050 | 1230 AN0390 |
| 1288 CONTIG7 | 27990  | 28269  | 1.7  | 2.12E-02 | transcription_start_site | + | 30528  | 30528  | -2398 | 1231 AN0390 |
| 811 CONTIG7  | 30827  | 31201  | 2.09 | 4.61E-03 | transcription_start_site | + | 31227  | 31227  | -213  | 1232 AN0391 |
| 811 CONTIG7  | 30827  | 31201  | 2.09 | 4.61E-03 | transcription_start_site | + | 31643  | 31643  | -629  | 1233 AN0391 |
| 1001 CONTIG7 | 26486  | 26920  | 1.91 | 8.81E-03 | transcription_start_site | + | 31227  | 31227  | -4524 | 1232 AN0391 |
| 1001 CONTIG7 | 26486  | 26920  | 1.91 | 8.81E-03 | transcription_start_site | + | 31643  | 31643  | -4940 | 1233 AN0391 |
| 1288 CONTIG7 | 27990  | 28269  | 1.7  | 2.12E-02 | transcription_start_site | + | 31227  | 31227  | -3097 | 1232 AN0391 |
| 1288 CONTIG7 | 27990  | 28269  | 1.7  | 2.12E-02 | transcription_start_site | + | 31643  | 31643  | -3513 | 1233 AN0391 |
| 2055 CONTIG7 | 39902  | 40327  | 1.35 | 8.01E-02 | transcription_start_site | + | 39124  | 39124  | 990   | 1240 AN0392 |
| 1108 CONTIG7 | 41327  | 41676  | 1.83 | 1.30E-02 | transcription_start_site | - | 41261  | 41261  | -240  | 1241 AN0393 |
| 1108 CONTIG7 | 41327  | 41676  | 1.83 | 1.30E-02 | transcription_start_site | - | 41098  | 41098  | -403  | 1242 AN0393 |
| 1108 CONTIG7 | 41327  | 41676  | 1.83 | 1.30E-02 | transcription_start_site | - | 40758  | 40758  | -743  | 1243 AN0393 |
| 2055 CONTIG7 | 39902  | 40327  | 1.35 | 8.01E-02 | transcription_start_site | - | 40758  | 40758  | 643   | 1243 AN0393 |

|              |       |       |      |          |                          |   |       |       |       |      |        |
|--------------|-------|-------|------|----------|--------------------------|---|-------|-------|-------|------|--------|
| 2055 CONTIG7 | 39902 | 40327 | 1.35 | 8.01E-02 | transcription_start_site | - | 41098 | 41098 | 983   | 1242 | AN0393 |
| 2055 CONTIG7 | 39902 | 40327 | 1.35 | 8.01E-02 | transcription_start_site | - | 41261 | 41261 | 1146  | 1241 | AN0393 |
| 2762 CONTIG7 | 40442 | 41226 | 1.09 | 1.93E-01 | transcription_start_site | - | 40758 | 40758 | -76   | 1243 | AN0393 |
| 2762 CONTIG7 | 40442 | 41226 | 1.09 | 1.93E-01 | transcription_start_site | - | 41098 | 41098 | 264   | 1242 | AN0393 |
| 2762 CONTIG7 | 40442 | 41226 | 1.09 | 1.93E-01 | transcription_start_site | - | 41261 | 41261 | 427   | 1241 | AN0393 |
| 1108 CONTIG7 | 41327 | 41676 | 1.83 | 1.30E-02 | transcription_start_site | + | 44009 | 44009 | -2507 | 1244 | AN0394 |
| 1108 CONTIG7 | 41327 | 41676 | 1.83 | 1.30E-02 | transcription_start_site | + | 44203 | 44203 | -2701 | 1245 | AN0394 |
| 1108 CONTIG7 | 41327 | 41676 | 1.83 | 1.30E-02 | transcription_start_site | + | 44727 | 44727 | -3225 | 1246 | AN0394 |
| 1108 CONTIG7 | 41327 | 41676 | 1.83 | 1.30E-02 | transcription_start_site | + | 45205 | 45205 | -3703 | 1247 | AN0394 |
| 1108 CONTIG7 | 41327 | 41676 | 1.83 | 1.30E-02 | transcription_start_site | + | 45336 | 45336 | -3834 | 1248 | AN0394 |
| 2055 CONTIG7 | 39902 | 40327 | 1.35 | 8.01E-02 | transcription_start_site | + | 44009 | 44009 | -3894 | 1244 | AN0394 |
| 2055 CONTIG7 | 39902 | 40327 | 1.35 | 8.01E-02 | transcription_start_site | + | 44203 | 44203 | -4088 | 1245 | AN0394 |
| 2055 CONTIG7 | 39902 | 40327 | 1.35 | 8.01E-02 | transcription_start_site | + | 44727 | 44727 | -4612 | 1246 | AN0394 |
| 2055 CONTIG7 | 39902 | 40327 | 1.35 | 8.01E-02 | transcription_start_site | + | 45205 | 45205 | -5090 | 1247 | AN0394 |
| 2762 CONTIG7 | 40442 | 41226 | 1.09 | 1.93E-01 | transcription_start_site | + | 44009 | 44009 | -3175 | 1244 | AN0394 |
| 2762 CONTIG7 | 40442 | 41226 | 1.09 | 1.93E-01 | transcription_start_site | + | 44203 | 44203 | -3369 | 1245 | AN0394 |
| 2762 CONTIG7 | 40442 | 41226 | 1.09 | 1.93E-01 | transcription_start_site | + | 44727 | 44727 | -3893 | 1246 | AN0394 |
| 2762 CONTIG7 | 40442 | 41226 | 1.09 | 1.93E-01 | transcription_start_site | + | 45205 | 45205 | -4371 | 1247 | AN0394 |
| 2762 CONTIG7 | 40442 | 41226 | 1.09 | 1.93E-01 | transcription_start_site | + | 45336 | 45336 | -4502 | 1248 | AN0394 |
| 171 CONTIG7  | 49652 | 50081 | 3    | 0.00E+00 | transcription_start_site | - | 47101 | 47101 | -2765 | 1249 | AN0395 |
| 171 CONTIG7  | 49652 | 50081 | 3    | 0.00E+00 | transcription_start_site | - | 46884 | 46884 | -2982 | 1250 | AN0395 |
| 171 CONTIG7  | 49652 | 50081 | 3    | 0.00E+00 | transcription_start_site | - | 46339 | 46339 | -3527 | 1251 | AN0395 |
| 186 CONTIG7  | 51080 | 51594 | 2.96 | 0.00E+00 | transcription_start_site | - | 47101 | 47101 | -4236 | 1249 | AN0395 |
| 186 CONTIG7  | 51080 | 51594 | 2.96 | 0.00E+00 | transcription_start_site | - | 46884 | 46884 | -4453 | 1250 | AN0395 |
| 186 CONTIG7  | 51080 | 51594 | 2.96 | 0.00E+00 | transcription_start_site | - | 46339 | 46339 | -4998 | 1251 | AN0395 |
| 171 CONTIG7  | 49652 | 50081 | 3    | 0.00E+00 | transcription_start_site | - | 49329 | 49329 | -537  | 1252 | AN0396 |
| 171 CONTIG7  | 49652 | 50081 | 3    | 0.00E+00 | transcription_start_site | - | 48981 | 48981 | -885  | 1253 | AN0396 |
| 186 CONTIG7  | 51080 | 51594 | 2.96 | 0.00E+00 | transcription_start_site | - | 49329 | 49329 | -2008 | 1252 | AN0396 |
| 186 CONTIG7  | 51080 | 51594 | 2.96 | 0.00E+00 | transcription_start_site | - | 48981 | 48981 | -2356 | 1253 | AN0396 |
| 171 CONTIG7  | 49652 | 50081 | 3    | 0.00E+00 | transcription_start_site | + | 50073 | 50073 | -206  | 1254 | AN0397 |
| 171 CONTIG7  | 49652 | 50081 | 3    | 0.00E+00 | transcription_start_site | + | 50424 | 50424 | -557  | 1255 | AN0397 |
| 186 CONTIG7  | 51080 | 51594 | 2.96 | 0.00E+00 | transcription_start_site | + | 50424 | 50424 | 913   | 1255 | AN0397 |
| 186 CONTIG7  | 51080 | 51594 | 2.96 | 0.00E+00 | transcription_start_site | + | 56344 | 56344 | -5007 | 1260 | AN0399 |
| 186 CONTIG7  | 51080 | 51594 | 2.96 | 0.00E+00 | transcription_start_site | + | 56566 | 56566 | -5229 | 1261 | AN0399 |
| 2330 CONTIG7 | 59420 | 59699 | 1.26 | 1.08E-01 | transcription_start_site | + | 59066 | 59066 | 493   | 1265 | AN0400 |
| 2330 CONTIG7 | 59420 | 59699 | 1.26 | 1.08E-01 | transcription_start_site | + | 60050 | 60050 | -490  | 1266 | AN0401 |
| 2330 CONTIG7 | 59420 | 59699 | 1.26 | 1.08E-01 | transcription_start_site | + | 60162 | 60162 | -602  | 1267 | AN0401 |
| 2330 CONTIG7 | 59420 | 59699 | 1.26 | 1.08E-01 | transcription_start_site | + | 60298 | 60298 | -738  | 1268 | AN0401 |
| 2330 CONTIG7 | 59420 | 59699 | 1.26 | 1.08E-01 | transcription_start_site | + | 60620 | 60620 | -1060 | 1269 | AN0401 |
| 2330 CONTIG7 | 59420 | 59699 | 1.26 | 1.08E-01 | transcription_start_site | + | 60778 | 60778 | -1218 | 1270 | AN0401 |
| 2330 CONTIG7 | 59420 | 59699 | 1.26 | 1.08E-01 | transcription_start_site | + | 61661 | 61661 | -2101 | 1271 | AN0402 |
| 2330 CONTIG7 | 59420 | 59699 | 1.26 | 1.08E-01 | transcription_start_site | + | 61974 | 61974 | -2414 | 1272 | AN0402 |
| 2330 CONTIG7 | 59420 | 59699 | 1.26 | 1.08E-01 | transcription_start_site | + | 62157 | 62157 | -2597 | 1273 | AN0402 |
| 2330 CONTIG7 | 59420 | 59699 | 1.26 | 1.08E-01 | transcription_start_site | + | 62386 | 62386 | -2826 | 1274 | AN0402 |
| 1938 CONTIG7 | 64579 | 64858 | 1.39 | 6.84E-02 | transcription_start_site | + | 64507 | 64507 | 211   | 1275 | AN0403 |
| 1938 CONTIG7 | 64579 | 64858 | 1.39 | 6.84E-02 | transcription_start_site | + | 65028 | 65028 | -309  | 1276 | AN0403 |
| 1938 CONTIG7 | 64579 | 64858 | 1.39 | 6.84E-02 | transcription_start_site | + | 65268 | 65268 | -549  | 1277 | AN0403 |
| 1938 CONTIG7 | 64579 | 64858 | 1.39 | 6.84E-02 | transcription_start_site | + | 65669 | 65669 | -950  | 1278 | AN0403 |
| 1938 CONTIG7 | 64579 | 64858 | 1.39 | 6.84E-02 | transcription_start_site | + | 66444 | 66444 | -1725 | 1279 | AN0403 |
| 2330 CONTIG7 | 59420 | 59699 | 1.26 | 1.08E-01 | transcription_start_site | + | 64507 | 64507 | -4947 | 1275 | AN0403 |
| 1938 CONTIG7 | 64579 | 64858 | 1.39 | 6.84E-02 | transcription_start_site | + | 67414 | 67414 | -2695 | 1280 | AN0404 |
| 1938 CONTIG7 | 64579 | 64858 | 1.39 | 6.84E-02 | transcription_start_site | + | 67565 | 67565 | -2846 | 1281 | AN0404 |
| 2186 CONTIG7 | 68265 | 68679 | 1.3  | 9.24E-02 | transcription_start_site | + | 67565 | 67565 | 907   | 1281 | AN0404 |
| 2186 CONTIG7 | 68265 | 68679 | 1.3  | 9.24E-02 | transcription_start_site | + | 67414 | 67414 | 1058  | 1280 | AN0404 |
| 1939 CONTIG7 | 70370 | 70854 | 1.39 | 6.84E-02 | transcription_start_site | + | 75789 | 75789 | -5177 | 1287 | AN0407 |
| 1940 CONTIG7 | 82218 | 82477 | 1.39 | 6.84E-02 | transcription_start_site | - | 82342 | 82342 | -5    | 1292 | AN0408 |
| 1940 CONTIG7 | 82218 | 82477 | 1.39 | 6.84E-02 | transcription_start_site | - | 80843 | 80843 | -1504 | 1293 | AN0408 |



|      |         |        |        |      |          |                          |   |        |        |       |      |        |
|------|---------|--------|--------|------|----------|--------------------------|---|--------|--------|-------|------|--------|
| 1232 | CONTIG7 | 91891  | 92245  | 1.74 | 1.84E-02 | transcription_start_site | + | 92593  | 92593  | -525  | 1296 | AN0410 |
| 1232 | CONTIG7 | 91891  | 92245  | 1.74 | 1.84E-02 | transcription_start_site | + | 92844  | 92844  | -776  | 1297 | AN0410 |
| 1232 | CONTIG7 | 91891  | 92245  | 1.74 | 1.84E-02 | transcription_start_site | + | 93409  | 93409  | -1341 | 1298 | AN0410 |
| 1232 | CONTIG7 | 91891  | 92245  | 1.74 | 1.84E-02 | transcription_start_site | + | 93788  | 93788  | -1720 | 1299 | AN0410 |
| 315  | CONTIG7 | 101344 | 101618 | 2.74 | 0.00E+00 | transcription_start_site | - | 97915  | 97915  | -3566 | 1300 | AN0411 |
| 315  | CONTIG7 | 101344 | 101618 | 2.74 | 0.00E+00 | transcription_start_site | - | 97729  | 97729  | -3752 | 1301 | AN0411 |
| 315  | CONTIG7 | 101344 | 101618 | 2.74 | 0.00E+00 | transcription_start_site | - | 97509  | 97509  | -3972 | 1302 | AN0411 |
| 315  | CONTIG7 | 101344 | 101618 | 2.74 | 0.00E+00 | transcription_start_site | - | 97381  | 97381  | -4100 | 1303 | AN0411 |
| 315  | CONTIG7 | 101344 | 101618 | 2.74 | 0.00E+00 | transcription_start_site | - | 97245  | 97245  | -4236 | 1304 | AN0411 |
| 315  | CONTIG7 | 101344 | 101618 | 2.74 | 0.00E+00 | transcription_start_site | - | 96870  | 96870  | -4611 | 1305 | AN0411 |
| 536  | CONTIG7 | 102154 | 102963 | 2.39 | 0.00E+00 | transcription_start_site | - | 97915  | 97915  | -4643 | 1300 | AN0411 |
| 536  | CONTIG7 | 102154 | 102963 | 2.39 | 0.00E+00 | transcription_start_site | - | 97729  | 97729  | -4829 | 1301 | AN0411 |
| 536  | CONTIG7 | 102154 | 102963 | 2.39 | 0.00E+00 | transcription_start_site | - | 97509  | 97509  | -5049 | 1302 | AN0411 |
| 536  | CONTIG7 | 102154 | 102963 | 2.39 | 0.00E+00 | transcription_start_site | - | 97381  | 97381  | -5177 | 1303 | AN0411 |
| 536  | CONTIG7 | 102154 | 102963 | 2.39 | 0.00E+00 | transcription_start_site | - | 97245  | 97245  | -5313 | 1304 | AN0411 |
| 1453 | CONTIG7 | 99978  | 100267 | 1.61 | 3.08E-02 | transcription_start_site | - | 97915  | 97915  | -2207 | 1300 | AN0411 |
| 1453 | CONTIG7 | 99978  | 100267 | 1.61 | 3.08E-02 | transcription_start_site | - | 97729  | 97729  | -2393 | 1301 | AN0411 |
| 1453 | CONTIG7 | 99978  | 100267 | 1.61 | 3.08E-02 | transcription_start_site | - | 97509  | 97509  | -2613 | 1302 | AN0411 |
| 1453 | CONTIG7 | 99978  | 100267 | 1.61 | 3.08E-02 | transcription_start_site | - | 97381  | 97381  | -2741 | 1303 | AN0411 |
| 1453 | CONTIG7 | 99978  | 100267 | 1.61 | 3.08E-02 | transcription_start_site | - | 97245  | 97245  | -2877 | 1304 | AN0411 |
| 1453 | CONTIG7 | 99978  | 100267 | 1.61 | 3.08E-02 | transcription_start_site | - | 96870  | 96870  | -3252 | 1305 | AN0411 |
| 315  | CONTIG7 | 101344 | 101618 | 2.74 | 0.00E+00 | transcription_start_site | - | 100781 | 100781 | -700  | 1306 | AN0412 |
| 536  | CONTIG7 | 102154 | 102963 | 2.39 | 0.00E+00 | transcription_start_site | - | 100781 | 100781 | -1777 | 1306 | AN0412 |
| 1289 | CONTIG7 | 104569 | 104903 | 1.7  | 2.12E-02 | transcription_start_site | - | 100781 | 100781 | -3955 | 1306 | AN0412 |
| 1453 | CONTIG7 | 99978  | 100267 | 1.61 | 3.08E-02 | transcription_start_site | - | 100781 | 100781 | 658   | 1306 | AN0412 |
| 1289 | CONTIG7 | 104569 | 104903 | 1.7  | 2.12E-02 | transcription_start_site | - | 104920 | 104920 | 184   | 1312 | AN0413 |
| 1289 | CONTIG7 | 104569 | 104903 | 1.7  | 2.12E-02 | transcription_start_site | - | 105185 | 105185 | 449   | 1311 | AN0413 |
| 1289 | CONTIG7 | 104569 | 104903 | 1.7  | 2.12E-02 | transcription_start_site | - | 105447 | 105447 | 711   | 1310 | AN0413 |
| 1289 | CONTIG7 | 104569 | 104903 | 1.7  | 2.12E-02 | transcription_start_site | - | 105736 | 105736 | 1000  | 1309 | AN0413 |
| 541  | CONTIG7 | 120846 | 121180 | 2.39 | 1.01E-03 | transcription_start_site | + | 121813 | 121813 | -800  | 1315 | AN0416 |
| 541  | CONTIG7 | 120846 | 121180 | 2.39 | 1.01E-03 | transcription_start_site | + | 121951 | 121951 | -938  | 1316 | AN0416 |
| 541  | CONTIG7 | 120846 | 121180 | 2.39 | 1.01E-03 | transcription_start_site | + | 122445 | 122445 | -1432 | 1317 | AN0416 |
| 541  | CONTIG7 | 120846 | 121180 | 2.39 | 1.01E-03 | transcription_start_site | + | 122688 | 122688 | -1675 | 1318 | AN0416 |
| 541  | CONTIG7 | 120846 | 121180 | 2.39 | 1.01E-03 | transcription_start_site | + | 123691 | 123691 | -2678 | 1319 | AN0417 |
| 541  | CONTIG7 | 120846 | 121180 | 2.39 | 1.01E-03 | transcription_start_site | + | 123808 | 123808 | -2795 | 1320 | AN0417 |
| 541  | CONTIG7 | 120846 | 121180 | 2.39 | 1.01E-03 | transcription_start_site | + | 124219 | 124219 | -3206 | 1321 | AN0417 |
| 2760 | CONTIG7 | 159760 | 160335 | 1.09 | 1.79E-01 | transcription_start_site | - | 156041 | 156041 | -4006 | 1353 | AN0428 |
| 2760 | CONTIG7 | 159760 | 160335 | 1.09 | 1.79E-01 | transcription_start_site | - | 155697 | 155697 | -4350 | 1354 | AN0428 |
| 2760 | CONTIG7 | 159760 | 160335 | 1.09 | 1.79E-01 | transcription_start_site | - | 155620 | 155620 | -4427 | 1355 | AN0428 |
| 2760 | CONTIG7 | 159760 | 160335 | 1.09 | 1.79E-01 | transcription_start_site | - | 155491 | 155491 | -4556 | 1356 | AN0428 |
| 2760 | CONTIG7 | 159760 | 160335 | 1.09 | 1.79E-01 | transcription_start_site | - | 154986 | 154986 | -5061 | 1357 | AN0428 |
| 2760 | CONTIG7 | 159760 | 160335 | 1.09 | 1.79E-01 | transcription_start_site | - | 159831 | 159831 | -216  | 1360 | AN0430 |
| 1290 | CONTIG7 | 171920 | 172184 | 1.7  | 2.12E-02 | transcription_start_site | - | 169177 | 169177 | -2875 | 1361 | AN0432 |
| 1290 | CONTIG7 | 171920 | 172184 | 1.7  | 2.12E-02 | transcription_start_site | - | 169054 | 169054 | -2998 | 1362 | AN0432 |
| 1290 | CONTIG7 | 171920 | 172184 | 1.7  | 2.12E-02 | transcription_start_site | - | 168723 | 168723 | -3329 | 1363 | AN0432 |
| 1290 | CONTIG7 | 171920 | 172184 | 1.7  | 2.12E-02 | transcription_start_site | - | 168585 | 168585 | -3467 | 1364 | AN0432 |
| 1290 | CONTIG7 | 171920 | 172184 | 1.7  | 2.12E-02 | transcription_start_site | - | 171236 | 171236 | -816  | 1365 | AN0433 |
| 1290 | CONTIG7 | 171920 | 172184 | 1.7  | 2.12E-02 | transcription_start_site | - | 171071 | 171071 | -981  | 1366 | AN0433 |
| 1290 | CONTIG7 | 171920 | 172184 | 1.7  | 2.12E-02 | transcription_start_site | - | 170835 | 170835 | -1217 | 1367 | AN0433 |
| 632  | CONTIG7 | 166821 | 167236 | 2.26 | 1.80E-03 | transcription_start_site | + | 172118 | 172118 | -5089 | 1368 | AN0434 |
| 1290 | CONTIG7 | 171920 | 172184 | 1.7  | 2.12E-02 | transcription_start_site | + | 172118 | 172118 | -66   | 1368 | AN0434 |
| 1290 | CONTIG7 | 171920 | 172184 | 1.7  | 2.12E-02 | transcription_start_site | + | 172733 | 172733 | -681  | 1369 | AN0434 |
| 1290 | CONTIG7 | 171920 | 172184 | 1.7  | 2.12E-02 | transcription_start_site | + | 172863 | 172863 | -811  | 1370 | AN0434 |
| 1290 | CONTIG7 | 171920 | 172184 | 1.7  | 2.12E-02 | transcription_start_site | + | 173066 | 173066 | -1014 | 1371 | AN0434 |
| 1290 | CONTIG7 | 171920 | 172184 | 1.7  | 2.12E-02 | transcription_start_site | + | 173179 | 173179 | -1127 | 1372 | AN0434 |
| 1290 | CONTIG7 | 171920 | 172184 | 1.7  | 2.12E-02 | transcription_start_site | + | 173654 | 173654 | -1602 | 1373 | AN0434 |
| 2763 | CONTIG7 | 182795 | 183059 | 1.09 | 1.93E-01 | transcription_start_site | - | 182788 | 182788 | -139  | 1382 | AN0437 |

|      |         |        |        |      |          |                          |   |        |        |       |      |        |
|------|---------|--------|--------|------|----------|--------------------------|---|--------|--------|-------|------|--------|
| 2763 | CONTIG7 | 182795 | 183059 | 1.09 | 1.93E-01 | transcription_start_site | - | 182253 | 182253 | -674  | 1383 | AN0437 |
| 2763 | CONTIG7 | 182795 | 183059 | 1.09 | 1.93E-01 | transcription_start_site | - | 182068 | 182068 | -859  | 1384 | AN0437 |
| 2763 | CONTIG7 | 182795 | 183059 | 1.09 | 1.93E-01 | transcription_start_site | - | 181839 | 181839 | -1088 | 1385 | AN0437 |
| 2763 | CONTIG7 | 182795 | 183059 | 1.09 | 1.93E-01 | transcription_start_site | - | 181738 | 181738 | -1189 | 1386 | AN0437 |
| 2763 | CONTIG7 | 182795 | 183059 | 1.09 | 1.93E-01 | transcription_start_site | - | 181447 | 181447 | -1480 | 1387 | AN0437 |
| 2763 | CONTIG7 | 182795 | 183059 | 1.09 | 1.93E-01 | transcription_start_site | - | 181188 | 181188 | -1739 | 1388 | AN0437 |
| 2763 | CONTIG7 | 182795 | 183059 | 1.09 | 1.93E-01 | transcription_start_site | - | 180667 | 180667 | -2260 | 1389 | AN0437 |
| 2763 | CONTIG7 | 182795 | 183059 | 1.09 | 1.93E-01 | transcription_start_site | - | 180576 | 180576 | -2351 | 1390 | AN0437 |
| 2763 | CONTIG7 | 182795 | 183059 | 1.09 | 1.93E-01 | transcription_start_site | + | 183861 | 183861 | -934  | 1391 | AN0438 |
| 2763 | CONTIG7 | 182795 | 183059 | 1.09 | 1.93E-01 | transcription_start_site | + | 185431 | 185431 | -2504 | 1392 | AN0439 |
| 2763 | CONTIG7 | 182795 | 183059 | 1.09 | 1.93E-01 | transcription_start_site | + | 185535 | 185535 | -2608 | 1393 | AN0439 |
| 2763 | CONTIG7 | 182795 | 183059 | 1.09 | 1.93E-01 | transcription_start_site | + | 186012 | 186012 | -3085 | 1394 | AN0439 |
| 2763 | CONTIG7 | 182795 | 183059 | 1.09 | 1.93E-01 | transcription_start_site | + | 186209 | 186209 | -3282 | 1395 | AN0439 |
| 467  | CONTIG7 | 208667 | 209011 | 2.48 | 8.69E-04 | transcription_start_site | - | 206763 | 206763 | -2076 | 1424 | AN0446 |
| 467  | CONTIG7 | 208667 | 209011 | 2.48 | 8.69E-04 | transcription_start_site | - | 204624 | 204624 | -4215 | 1425 | AN0446 |
| 672  | CONTIG7 | 209552 | 210216 | 2.22 | 2.22E-03 | transcription_start_site | - | 206763 | 206763 | -3121 | 1424 | AN0446 |
| 672  | CONTIG7 | 209552 | 210216 | 2.22 | 2.22E-03 | transcription_start_site | - | 204624 | 204624 | -5260 | 1425 | AN0446 |
| 672  | CONTIG7 | 209552 | 210216 | 2.22 | 2.22E-03 | transcription_start_site | + | 214579 | 214579 | -4695 | 1429 | AN0448 |
| 672  | CONTIG7 | 209552 | 210216 | 2.22 | 2.22E-03 | transcription_start_site | + | 214698 | 214698 | -4814 | 1430 | AN0448 |
| 2764 | CONTIG7 | 217889 | 218166 | 1.09 | 1.93E-01 | transcription_start_site | + | 218138 | 218138 | -110  | 1434 | AN0449 |
| 2764 | CONTIG7 | 217889 | 218166 | 1.09 | 1.93E-01 | transcription_start_site | + | 217560 | 217560 | 467   | 1433 | AN0449 |
| 2764 | CONTIG7 | 217889 | 218166 | 1.09 | 1.93E-01 | transcription_start_site | + | 217163 | 217163 | 864   | 1432 | AN0449 |
| 2764 | CONTIG7 | 217889 | 218166 | 1.09 | 1.93E-01 | transcription_start_site | + | 219663 | 219663 | -1635 | 1435 | AN0449 |
| 2764 | CONTIG7 | 217889 | 218166 | 1.09 | 1.93E-01 | transcription_start_site | + | 220525 | 220525 | -2497 | 1436 | AN0449 |
| 2764 | CONTIG7 | 217889 | 218166 | 1.09 | 1.93E-01 | transcription_start_site | + | 220687 | 220687 | -2659 | 1437 | AN0449 |
| 2761 | CONTIG7 | 221780 | 222132 | 1.09 | 1.79E-01 | transcription_start_site | - | 222770 | 222770 | 814   | 1438 | AN0450 |
| 1442 | CONTIG7 | 228546 | 230375 | 1.61 | 0.00E+00 | transcription_start_site | - | 223819 | 223819 | -5641 | 1439 | AN0451 |
| 2761 | CONTIG7 | 221780 | 222132 | 1.09 | 1.79E-01 | transcription_start_site | + | 225514 | 225514 | -3558 | 1442 | AN0452 |
| 2761 | CONTIG7 | 221780 | 222132 | 1.09 | 1.79E-01 | transcription_start_site | + | 225889 | 225889 | -3933 | 1443 | AN0452 |
| 1442 | CONTIG7 | 228546 | 230375 | 1.61 | 0.00E+00 | transcription_start_site | + | 228238 | 228238 | 1222  | 1444 | AN0453 |
| 1442 | CONTIG7 | 228546 | 230375 | 1.61 | 0.00E+00 | transcription_start_site | + | 230649 | 230649 | -1188 | 1445 | AN0454 |
| 2438 | CONTIG7 | 231231 | 231650 | 1.22 | 1.25E-01 | transcription_start_site | + | 230649 | 230649 | 791   | 1445 | AN0454 |
| 2187 | CONTIG7 | 240996 | 241270 | 1.3  | 9.24E-02 | transcription_start_site | - | 238468 | 238468 | -2665 | 1446 | AN0456 |
| 2688 | CONTIG7 | 239041 | 239320 | 1.13 | 1.66E-01 | transcription_start_site | - | 238468 | 238468 | -712  | 1446 | AN0456 |
| 419  | CONTIG7 | 236346 | 236620 | 2.57 | 6.10E-04 | transcription_start_site | + | 239098 | 239098 | -2615 | 1447 | AN0457 |
| 419  | CONTIG7 | 236346 | 236620 | 2.57 | 6.10E-04 | transcription_start_site | + | 239291 | 239291 | -2808 | 1448 | AN0457 |
| 419  | CONTIG7 | 236346 | 236620 | 2.57 | 6.10E-04 | transcription_start_site | + | 239400 | 239400 | -2917 | 1449 | AN0457 |
| 2688 | CONTIG7 | 239041 | 239320 | 1.13 | 1.66E-01 | transcription_start_site | + | 239098 | 239098 | 82    | 1447 | AN0457 |
| 2688 | CONTIG7 | 239041 | 239320 | 1.13 | 1.66E-01 | transcription_start_site | + | 239291 | 239291 | -110  | 1448 | AN0457 |
| 2688 | CONTIG7 | 239041 | 239320 | 1.13 | 1.66E-01 | transcription_start_site | + | 239400 | 239400 | -219  | 1449 | AN0457 |
| 2187 | CONTIG7 | 240996 | 241270 | 1.3  | 9.24E-02 | transcription_start_site | - | 241256 | 241256 | 123   | 1451 | AN0458 |
| 2187 | CONTIG7 | 240996 | 241270 | 1.3  | 9.24E-02 | transcription_start_site | - | 241688 | 241688 | 555   | 1450 | AN0458 |
| 2187 | CONTIG7 | 240996 | 241270 | 1.3  | 9.24E-02 | transcription_start_site | + | 245428 | 245428 | -4295 | 1454 | AN0460 |
| 728  | CONTIG7 | 268505 | 268869 | 2.17 | 3.03E-03 | transcription_start_site | - | 263810 | 263810 | -4877 | 1463 | AN0464 |
| 1742 | CONTIG7 | 263495 | 264744 | 1.48 | 2.48E-02 | transcription_start_site | - | 263810 | 263810 | -309  | 1463 | AN0464 |
| 1742 | CONTIG7 | 263495 | 264744 | 1.48 | 2.48E-02 | transcription_start_site | - | 263155 | 263155 | -964  | 1464 | AN0464 |
| 1742 | CONTIG7 | 263495 | 264744 | 1.48 | 2.48E-02 | transcription_start_site | - | 262576 | 262576 | -1543 | 1465 | AN0464 |
| 2188 | CONTIG7 | 265295 | 265578 | 1.3  | 9.24E-02 | transcription_start_site | - | 263810 | 263810 | -1626 | 1463 | AN0464 |
| 2188 | CONTIG7 | 265295 | 265578 | 1.3  | 9.24E-02 | transcription_start_site | - | 263155 | 263155 | -2281 | 1464 | AN0464 |
| 2188 | CONTIG7 | 265295 | 265578 | 1.3  | 9.24E-02 | transcription_start_site | - | 262576 | 262576 | -2860 | 1465 | AN0464 |
| 728  | CONTIG7 | 268505 | 268869 | 2.17 | 3.03E-03 | transcription_start_site | - | 264836 | 264836 | -3851 | 1466 | AN0465 |
| 728  | CONTIG7 | 268505 | 268869 | 2.17 | 3.03E-03 | transcription_start_site | - | 264704 | 264704 | -3983 | 1467 | AN0465 |
| 1742 | CONTIG7 | 263495 | 264744 | 1.48 | 2.48E-02 | transcription_start_site | - | 264704 | 264704 | 584   | 1467 | AN0465 |
| 1742 | CONTIG7 | 263495 | 264744 | 1.48 | 2.48E-02 | transcription_start_site | - | 264836 | 264836 | 716   | 1466 | AN0465 |
| 2188 | CONTIG7 | 265295 | 265578 | 1.3  | 9.24E-02 | transcription_start_site | - | 264836 | 264836 | -600  | 1466 | AN0465 |
| 2188 | CONTIG7 | 265295 | 265578 | 1.3  | 9.24E-02 | transcription_start_site | - | 264704 | 264704 | -732  | 1467 | AN0465 |
| 728  | CONTIG7 | 268505 | 268869 | 2.17 | 3.03E-03 | transcription_start_site | - | 266867 | 266867 | -1820 | 1468 | AN0466 |

|      |         |        |        |      |          |                          |   |        |        |       |      |        |
|------|---------|--------|--------|------|----------|--------------------------|---|--------|--------|-------|------|--------|
| 728  | CONTIG7 | 268505 | 268869 | 2.17 | 3.03E-03 | transcription_start_site | - | 268067 | 268067 | -620  | 1469 | AN0467 |
| 728  | CONTIG7 | 268505 | 268869 | 2.17 | 3.03E-03 | transcription_start_site | - | 267401 | 267401 | -1286 | 1470 | AN0467 |
| 728  | CONTIG7 | 268505 | 268869 | 2.17 | 3.03E-03 | transcription_start_site | + | 269264 | 269264 | -577  | 1471 | AN0468 |
| 728  | CONTIG7 | 268505 | 268869 | 2.17 | 3.03E-03 | transcription_start_site | + | 269857 | 269857 | -1170 | 1472 | AN0468 |
| 1742 | CONTIG7 | 263495 | 264744 | 1.48 | 2.48E-02 | transcription_start_site | + | 269264 | 269264 | -5144 | 1471 | AN0468 |
| 2188 | CONTIG7 | 265295 | 265578 | 1.3  | 9.24E-02 | transcription_start_site | + | 269264 | 269264 | -3827 | 1471 | AN0468 |
| 2188 | CONTIG7 | 265295 | 265578 | 1.3  | 9.24E-02 | transcription_start_site | + | 269857 | 269857 | -4420 | 1472 | AN0468 |
| 2689 | CONTIG7 | 278476 | 279220 | 1.13 | 1.66E-01 | transcription_start_site | - | 274556 | 274556 | -4292 | 1473 | AN0469 |
| 2689 | CONTIG7 | 278476 | 279220 | 1.13 | 1.66E-01 | transcription_start_site | - | 274433 | 274433 | -4415 | 1474 | AN0469 |
| 2689 | CONTIG7 | 278476 | 279220 | 1.13 | 1.66E-01 | transcription_start_site | - | 273866 | 273866 | -4982 | 1475 | AN0469 |
| 2689 | CONTIG7 | 278476 | 279220 | 1.13 | 1.66E-01 | transcription_start_site | - | 273510 | 273510 | -5338 | 1476 | AN0469 |
| 134  | CONTIG7 | 281941 | 282285 | 3.09 | 0.00E+00 | transcription_start_site | - | 279452 | 279452 | -2661 | 1481 | AN0470 |
| 134  | CONTIG7 | 281941 | 282285 | 3.09 | 0.00E+00 | transcription_start_site | - | 279063 | 279063 | -3050 | 1482 | AN0470 |
| 134  | CONTIG7 | 281941 | 282285 | 3.09 | 0.00E+00 | transcription_start_site | - | 278615 | 278615 | -3498 | 1483 | AN0470 |
| 2689 | CONTIG7 | 278476 | 279220 | 1.13 | 1.66E-01 | transcription_start_site | - | 279063 | 279063 | 215   | 1482 | AN0470 |
| 2689 | CONTIG7 | 278476 | 279220 | 1.13 | 1.66E-01 | transcription_start_site | - | 278615 | 278615 | -233  | 1483 | AN0470 |
| 2689 | CONTIG7 | 278476 | 279220 | 1.13 | 1.66E-01 | transcription_start_site | - | 279452 | 279452 | 604   | 1481 | AN0470 |
| 134  | CONTIG7 | 281941 | 282285 | 3.09 | 0.00E+00 | transcription_start_site | - | 281421 | 281421 | -692  | 1484 | AN0471 |
| 134  | CONTIG7 | 281941 | 282285 | 3.09 | 0.00E+00 | transcription_start_site | - | 280981 | 280981 | -1132 | 1485 | AN0471 |
| 134  | CONTIG7 | 281941 | 282285 | 3.09 | 0.00E+00 | transcription_start_site | - | 280085 | 280085 | -2028 | 1486 | AN0471 |
| 2689 | CONTIG7 | 278476 | 279220 | 1.13 | 1.66E-01 | transcription_start_site | - | 280085 | 280085 | 1237  | 1486 | AN0471 |
| 134  | CONTIG7 | 281941 | 282285 | 3.09 | 0.00E+00 | transcription_start_site | - | 282961 | 282961 | 848   | 1493 | AN0472 |
| 134  | CONTIG7 | 281941 | 282285 | 3.09 | 0.00E+00 | transcription_start_site | - | 283269 | 283269 | 1156  | 1492 | AN0472 |
| 670  | CONTIG7 | 287786 | 288291 | 2.22 | 0.00E+00 | transcription_start_site | - | 285950 | 285950 | -2088 | 1487 | AN0472 |
| 670  | CONTIG7 | 287786 | 288291 | 2.22 | 0.00E+00 | transcription_start_site | - | 285737 | 285737 | -2301 | 1488 | AN0472 |
| 670  | CONTIG7 | 287786 | 288291 | 2.22 | 0.00E+00 | transcription_start_site | - | 285313 | 285313 | -2725 | 1489 | AN0472 |
| 670  | CONTIG7 | 287786 | 288291 | 2.22 | 0.00E+00 | transcription_start_site | - | 285160 | 285160 | -2878 | 1490 | AN0472 |
| 670  | CONTIG7 | 287786 | 288291 | 2.22 | 0.00E+00 | transcription_start_site | - | 283384 | 283384 | -4654 | 1491 | AN0472 |
| 670  | CONTIG7 | 287786 | 288291 | 2.22 | 0.00E+00 | transcription_start_site | - | 283269 | 283269 | -4769 | 1492 | AN0472 |
| 670  | CONTIG7 | 287786 | 288291 | 2.22 | 0.00E+00 | transcription_start_site | - | 282961 | 282961 | -5077 | 1493 | AN0472 |
| 670  | CONTIG7 | 287786 | 288291 | 2.22 | 0.00E+00 | transcription_start_site | + | 288386 | 288386 | -347  | 1494 | AN0473 |
| 670  | CONTIG7 | 287786 | 288291 | 2.22 | 0.00E+00 | transcription_start_site | + | 289096 | 289096 | -1057 | 1495 | AN0473 |
| 670  | CONTIG7 | 287786 | 288291 | 2.22 | 0.00E+00 | transcription_start_site | + | 289410 | 289410 | -1371 | 1496 | AN0473 |
| 670  | CONTIG7 | 287786 | 288291 | 2.22 | 0.00E+00 | transcription_start_site | + | 289590 | 289590 | -1551 | 1497 | AN0473 |
| 670  | CONTIG7 | 287786 | 288291 | 2.22 | 0.00E+00 | transcription_start_site | + | 289762 | 289762 | -1723 | 1498 | AN0473 |
| 670  | CONTIG7 | 287786 | 288291 | 2.22 | 0.00E+00 | transcription_start_site | + | 290681 | 290681 | -2642 | 1499 | AN0474 |
| 670  | CONTIG7 | 287786 | 288291 | 2.22 | 0.00E+00 | transcription_start_site | + | 291206 | 291206 | -3167 | 1500 | AN0474 |
| 670  | CONTIG7 | 287786 | 288291 | 2.22 | 0.00E+00 | transcription_start_site | + | 291364 | 291364 | -3325 | 1501 | AN0474 |
| 670  | CONTIG7 | 287786 | 288291 | 2.22 | 0.00E+00 | transcription_start_site | + | 291637 | 291637 | -3598 | 1502 | AN0474 |
| 997  | CONTIG7 | 321152 | 322044 | 1.91 | 4.17E-03 | transcription_start_site | - | 317332 | 317332 | -4266 | 1530 | AN0482 |
| 997  | CONTIG7 | 321152 | 322044 | 1.91 | 4.17E-03 | transcription_start_site | - | 317253 | 317253 | -4345 | 1531 | AN0482 |
| 997  | CONTIG7 | 321152 | 322044 | 1.91 | 4.17E-03 | transcription_start_site | - | 317119 | 317119 | -4479 | 1532 | AN0482 |
| 2316 | CONTIG7 | 320117 | 321056 | 1.26 | 5.82E-02 | transcription_start_site | - | 317332 | 317332 | -3254 | 1530 | AN0482 |
| 2316 | CONTIG7 | 320117 | 321056 | 1.26 | 5.82E-02 | transcription_start_site | - | 317253 | 317253 | -3333 | 1531 | AN0482 |
| 2316 | CONTIG7 | 320117 | 321056 | 1.26 | 5.82E-02 | transcription_start_site | - | 317119 | 317119 | -3467 | 1532 | AN0482 |
| 568  | CONTIG7 | 323782 | 324511 | 2.35 | 0.00E+00 | transcription_start_site | - | 319919 | 319919 | -4227 | 1533 | AN0483 |
| 568  | CONTIG7 | 323782 | 324511 | 2.35 | 0.00E+00 | transcription_start_site | - | 319552 | 319552 | -4594 | 1534 | AN0483 |
| 997  | CONTIG7 | 321152 | 322044 | 1.91 | 4.17E-03 | transcription_start_site | - | 319919 | 319919 | -1679 | 1533 | AN0483 |
| 997  | CONTIG7 | 321152 | 322044 | 1.91 | 4.17E-03 | transcription_start_site | - | 319552 | 319552 | -2046 | 1534 | AN0483 |
| 2189 | CONTIG7 | 322362 | 323376 | 1.3  | 9.24E-02 | transcription_start_site | - | 319919 | 319919 | -2950 | 1533 | AN0483 |
| 2189 | CONTIG7 | 322362 | 323376 | 1.3  | 9.24E-02 | transcription_start_site | - | 319552 | 319552 | -3317 | 1534 | AN0483 |
| 2316 | CONTIG7 | 320117 | 321056 | 1.26 | 5.82E-02 | transcription_start_site | - | 319919 | 319919 | -667  | 1533 | AN0483 |
| 2316 | CONTIG7 | 320117 | 321056 | 1.26 | 5.82E-02 | transcription_start_site | - | 319552 | 319552 | -1034 | 1534 | AN0483 |
| 568  | CONTIG7 | 323782 | 324511 | 2.35 | 0.00E+00 | transcription_start_site | - | 321486 | 321486 | -2660 | 1535 | AN0484 |
| 568  | CONTIG7 | 323782 | 324511 | 2.35 | 0.00E+00 | transcription_start_site | - | 321383 | 321383 | -2763 | 1536 | AN0484 |
| 997  | CONTIG7 | 321152 | 322044 | 1.91 | 4.17E-03 | transcription_start_site | - | 321486 | 321486 | -112  | 1535 | AN0484 |
| 997  | CONTIG7 | 321152 | 322044 | 1.91 | 4.17E-03 | transcription_start_site | - | 321383 | 321383 | -215  | 1536 | AN0484 |

|      |         |        |        |      |          |                          |   |        |        |       |      |        |
|------|---------|--------|--------|------|----------|--------------------------|---|--------|--------|-------|------|--------|
| 2189 | CONTIG7 | 322362 | 323376 | 1.3  | 9.24E-02 | transcription_start_site | - | 321486 | 321486 | -1383 | 1535 | AN0484 |
| 2189 | CONTIG7 | 322362 | 323376 | 1.3  | 9.24E-02 | transcription_start_site | - | 321383 | 321383 | -1486 | 1536 | AN0484 |
| 2316 | CONTIG7 | 320117 | 321056 | 1.26 | 5.82E-02 | transcription_start_site | - | 321383 | 321383 | 796   | 1536 | AN0484 |
| 2316 | CONTIG7 | 320117 | 321056 | 1.26 | 5.82E-02 | transcription_start_site | - | 321486 | 321486 | 899   | 1535 | AN0484 |
| 2435 | CONTIG7 | 325652 | 326076 | 1.22 | 1.07E-01 | transcription_start_site | - | 321486 | 321486 | -4378 | 1535 | AN0484 |
| 2435 | CONTIG7 | 325652 | 326076 | 1.22 | 1.07E-01 | transcription_start_site | - | 321383 | 321383 | -4481 | 1536 | AN0484 |
| 568  | CONTIG7 | 323782 | 324511 | 2.35 | 0.00E+00 | transcription_start_site | - | 323981 | 323981 | -165  | 1537 | AN0485 |
| 568  | CONTIG7 | 323782 | 324511 | 2.35 | 0.00E+00 | transcription_start_site | - | 323186 | 323186 | -960  | 1538 | AN0485 |
| 568  | CONTIG7 | 323782 | 324511 | 2.35 | 0.00E+00 | transcription_start_site | - | 323096 | 323096 | -1050 | 1539 | AN0485 |
| 568  | CONTIG7 | 323782 | 324511 | 2.35 | 0.00E+00 | transcription_start_site | - | 322947 | 322947 | -1199 | 1540 | AN0485 |
| 997  | CONTIG7 | 321152 | 322044 | 1.91 | 4.17E-03 | transcription_start_site | - | 322947 | 322947 | 1349  | 1540 | AN0485 |
| 2189 | CONTIG7 | 322362 | 323376 | 1.3  | 9.24E-02 | transcription_start_site | - | 322947 | 322947 | 78    | 1540 | AN0485 |
| 2189 | CONTIG7 | 322362 | 323376 | 1.3  | 9.24E-02 | transcription_start_site | - | 323096 | 323096 | 227   | 1539 | AN0485 |
| 2189 | CONTIG7 | 322362 | 323376 | 1.3  | 9.24E-02 | transcription_start_site | - | 323186 | 323186 | 317   | 1538 | AN0485 |
| 2189 | CONTIG7 | 322362 | 323376 | 1.3  | 9.24E-02 | transcription_start_site | - | 323981 | 323981 | 1112  | 1537 | AN0485 |
| 2435 | CONTIG7 | 325652 | 326076 | 1.22 | 1.07E-01 | transcription_start_site | - | 323981 | 323981 | -1883 | 1537 | AN0485 |
| 2435 | CONTIG7 | 325652 | 326076 | 1.22 | 1.07E-01 | transcription_start_site | - | 323186 | 323186 | -2678 | 1538 | AN0485 |
| 2435 | CONTIG7 | 325652 | 326076 | 1.22 | 1.07E-01 | transcription_start_site | - | 323096 | 323096 | -2768 | 1539 | AN0485 |
| 2435 | CONTIG7 | 325652 | 326076 | 1.22 | 1.07E-01 | transcription_start_site | - | 322947 | 322947 | -2917 | 1540 | AN0485 |
| 568  | CONTIG7 | 323782 | 324511 | 2.35 | 0.00E+00 | transcription_start_site | + | 324896 | 324896 | -749  | 1541 | AN0486 |
| 568  | CONTIG7 | 323782 | 324511 | 2.35 | 0.00E+00 | transcription_start_site | + | 325153 | 325153 | -1006 | 1542 | AN0486 |
| 568  | CONTIG7 | 323782 | 324511 | 2.35 | 0.00E+00 | transcription_start_site | + | 325465 | 325465 | -1318 | 1543 | AN0486 |
| 568  | CONTIG7 | 323782 | 324511 | 2.35 | 0.00E+00 | transcription_start_site | + | 327062 | 327062 | -2915 | 1544 | AN0486 |
| 997  | CONTIG7 | 321152 | 322044 | 1.91 | 4.17E-03 | transcription_start_site | + | 324896 | 324896 | -3298 | 1541 | AN0486 |
| 997  | CONTIG7 | 321152 | 322044 | 1.91 | 4.17E-03 | transcription_start_site | + | 325153 | 325153 | -3555 | 1542 | AN0486 |
| 997  | CONTIG7 | 321152 | 322044 | 1.91 | 4.17E-03 | transcription_start_site | + | 325465 | 325465 | -3867 | 1543 | AN0486 |
| 2189 | CONTIG7 | 322362 | 323376 | 1.3  | 9.24E-02 | transcription_start_site | + | 324896 | 324896 | -2027 | 1541 | AN0486 |
| 2189 | CONTIG7 | 322362 | 323376 | 1.3  | 9.24E-02 | transcription_start_site | + | 325153 | 325153 | -2284 | 1542 | AN0486 |
| 2189 | CONTIG7 | 322362 | 323376 | 1.3  | 9.24E-02 | transcription_start_site | + | 325465 | 325465 | -2596 | 1543 | AN0486 |
| 2189 | CONTIG7 | 322362 | 323376 | 1.3  | 9.24E-02 | transcription_start_site | + | 327062 | 327062 | -4193 | 1544 | AN0486 |
| 2316 | CONTIG7 | 320117 | 321056 | 1.26 | 5.82E-02 | transcription_start_site | + | 324896 | 324896 | -4309 | 1541 | AN0486 |
| 2316 | CONTIG7 | 320117 | 321056 | 1.26 | 5.82E-02 | transcription_start_site | + | 325153 | 325153 | -4566 | 1542 | AN0486 |
| 2316 | CONTIG7 | 320117 | 321056 | 1.26 | 5.82E-02 | transcription_start_site | + | 325465 | 325465 | -4878 | 1543 | AN0486 |
| 2435 | CONTIG7 | 325652 | 326076 | 1.22 | 1.07E-01 | transcription_start_site | + | 325465 | 325465 | 399   | 1543 | AN0486 |
| 2435 | CONTIG7 | 325652 | 326076 | 1.22 | 1.07E-01 | transcription_start_site | + | 325153 | 325153 | 711   | 1542 | AN0486 |
| 2435 | CONTIG7 | 325652 | 326076 | 1.22 | 1.07E-01 | transcription_start_site | + | 324896 | 324896 | 968   | 1541 | AN0486 |
| 2435 | CONTIG7 | 325652 | 326076 | 1.22 | 1.07E-01 | transcription_start_site | + | 327062 | 327062 | -1198 | 1544 | AN0486 |
| 568  | CONTIG7 | 323782 | 324511 | 2.35 | 0.00E+00 | transcription_start_site | + | 328327 | 328327 | -4180 | 1545 | AN0487 |
| 568  | CONTIG7 | 323782 | 324511 | 2.35 | 0.00E+00 | transcription_start_site | + | 328430 | 328430 | -4283 | 1546 | AN0487 |
| 568  | CONTIG7 | 323782 | 324511 | 2.35 | 0.00E+00 | transcription_start_site | + | 329181 | 329181 | -5034 | 1547 | AN0487 |
| 568  | CONTIG7 | 323782 | 324511 | 2.35 | 0.00E+00 | transcription_start_site | + | 329385 | 329385 | -5238 | 1548 | AN0487 |
| 1747 | CONTIG7 | 331662 | 332166 | 1.48 | 5.22E-02 | transcription_start_site | + | 330899 | 330899 | 1015  | 1551 | AN0487 |
| 2189 | CONTIG7 | 322362 | 323376 | 1.3  | 9.24E-02 | transcription_start_site | + | 328327 | 328327 | -5458 | 1545 | AN0487 |
| 2435 | CONTIG7 | 325652 | 326076 | 1.22 | 1.07E-01 | transcription_start_site | + | 328327 | 328327 | -2463 | 1545 | AN0487 |
| 2435 | CONTIG7 | 325652 | 326076 | 1.22 | 1.07E-01 | transcription_start_site | + | 328430 | 328430 | -2566 | 1546 | AN0487 |
| 2435 | CONTIG7 | 325652 | 326076 | 1.22 | 1.07E-01 | transcription_start_site | + | 329181 | 329181 | -3317 | 1547 | AN0487 |
| 2435 | CONTIG7 | 325652 | 326076 | 1.22 | 1.07E-01 | transcription_start_site | + | 329385 | 329385 | -3521 | 1548 | AN0487 |
| 2435 | CONTIG7 | 325652 | 326076 | 1.22 | 1.07E-01 | transcription_start_site | + | 329806 | 329806 | -3942 | 1549 | AN0487 |
| 2435 | CONTIG7 | 325652 | 326076 | 1.22 | 1.07E-01 | transcription_start_site | + | 330211 | 330211 | -4347 | 1550 | AN0487 |
| 2435 | CONTIG7 | 325652 | 326076 | 1.22 | 1.07E-01 | transcription_start_site | + | 330899 | 330899 | -5035 | 1551 | AN0487 |
| 2765 | CONTIG7 | 338792 | 339126 | 1.09 | 1.93E-01 | transcription_start_site | - | 338849 | 338849 | -110  | 1553 | AN0489 |
| 2765 | CONTIG7 | 338792 | 339126 | 1.09 | 1.93E-01 | transcription_start_site | - | 339085 | 339085 | 126   | 1552 | AN0489 |
| 2765 | CONTIG7 | 338792 | 339126 | 1.09 | 1.93E-01 | transcription_start_site | - | 338286 | 338286 | -673  | 1554 | AN0489 |
| 2765 | CONTIG7 | 338792 | 339126 | 1.09 | 1.93E-01 | transcription_start_site | - | 337234 | 337234 | -1725 | 1555 | AN0489 |
| 542  | CONTIG7 | 351607 | 351966 | 2.39 | 1.01E-03 | transcription_start_site | + | 352429 | 352429 | -642  | 1568 | AN0493 |
| 946  | CONTIG7 | 357842 | 358186 | 1.96 | 7.85E-03 | transcription_start_site | - | 357154 | 357154 | -860  | 1569 | AN0494 |
| 2056 | CONTIG7 | 356117 | 356541 | 1.35 | 8.01E-02 | transcription_start_site | - | 357154 | 357154 | 825   | 1569 | AN0494 |

|      |         |        |        |      |          |                          |   |        |        |       |      |        |
|------|---------|--------|--------|------|----------|--------------------------|---|--------|--------|-------|------|--------|
| 946  | CONTIG7 | 357842 | 358186 | 1.96 | 7.85E-03 | transcription_start_site | + | 358065 | 358065 | -51   | 1570 | AN0495 |
| 2056 | CONTIG7 | 356117 | 356541 | 1.35 | 8.01E-02 | transcription_start_site | + | 358065 | 358065 | -1736 | 1570 | AN0495 |
| 2845 | CONTIG7 | 390686 | 391791 | 1.04 | 1.64E-01 | transcription_start_site | - | 388663 | 388663 | -2575 | 1591 | AN0504 |
| 2845 | CONTIG7 | 390686 | 391791 | 1.04 | 1.64E-01 | transcription_start_site | - | 388447 | 388447 | -2791 | 1592 | AN0504 |
| 2845 | CONTIG7 | 390686 | 391791 | 1.04 | 1.64E-01 | transcription_start_site | - | 387993 | 387993 | -3245 | 1593 | AN0504 |
| 2845 | CONTIG7 | 390686 | 391791 | 1.04 | 1.64E-01 | transcription_start_site | - | 387612 | 387612 | -3626 | 1594 | AN0504 |
| 2845 | CONTIG7 | 390686 | 391791 | 1.04 | 1.64E-01 | transcription_start_site | + | 391079 | 391079 | 159   | 1597 | AN0506 |
| 2845 | CONTIG7 | 390686 | 391791 | 1.04 | 1.64E-01 | transcription_start_site | + | 393832 | 393832 | -2593 | 1598 | AN0507 |
| 2845 | CONTIG7 | 390686 | 391791 | 1.04 | 1.64E-01 | transcription_start_site | + | 394728 | 394728 | -3489 | 1599 | AN0507 |
| 2845 | CONTIG7 | 390686 | 391791 | 1.04 | 1.64E-01 | transcription_start_site | + | 395167 | 395167 | -3928 | 1600 | AN0507 |
| 2845 | CONTIG7 | 390686 | 391791 | 1.04 | 1.64E-01 | transcription_start_site | + | 395817 | 395817 | -4578 | 1601 | AN0507 |
| 1941 | CONTIG7 | 434701 | 435800 | 1.39 | 6.84E-02 | transcription_start_site | + | 435397 | 435397 | -146  | 1635 | AN0517 |
| 1941 | CONTIG7 | 434701 | 435800 | 1.39 | 6.84E-02 | transcription_start_site | + | 434959 | 434959 | 291   | 1634 | AN0517 |
| 1941 | CONTIG7 | 434701 | 435800 | 1.39 | 6.84E-02 | transcription_start_site | + | 435564 | 435564 | -313  | 1636 | AN0517 |
| 1941 | CONTIG7 | 434701 | 435800 | 1.39 | 6.84E-02 | transcription_start_site | + | 434810 | 434810 | 440   | 1633 | AN0517 |
| 1941 | CONTIG7 | 434701 | 435800 | 1.39 | 6.84E-02 | transcription_start_site | + | 435719 | 435719 | -468  | 1637 | AN0517 |
| 1941 | CONTIG7 | 434701 | 435800 | 1.39 | 6.84E-02 | transcription_start_site | + | 436136 | 436136 | -885  | 1638 | AN0517 |
| 1941 | CONTIG7 | 434701 | 435800 | 1.39 | 6.84E-02 | transcription_start_site | + | 434090 | 434090 | 1160  | 1632 | AN0517 |
| 2190 | CONTIG7 | 436591 | 436850 | 1.3  | 9.24E-02 | transcription_start_site | + | 436136 | 436136 | 584   | 1638 | AN0517 |
| 2190 | CONTIG7 | 436591 | 436850 | 1.3  | 9.24E-02 | transcription_start_site | + | 435719 | 435719 | 1001  | 1637 | AN0517 |
| 2586 | CONTIG7 | 427354 | 427638 | 1.17 | 1.44E-01 | transcription_start_site | + | 430154 | 430154 | -2658 | 1626 | AN0517 |
| 2586 | CONTIG7 | 427354 | 427638 | 1.17 | 1.44E-01 | transcription_start_site | + | 430509 | 430509 | -3013 | 1627 | AN0517 |
| 2586 | CONTIG7 | 427354 | 427638 | 1.17 | 1.44E-01 | transcription_start_site | + | 430646 | 430646 | -3150 | 1628 | AN0517 |
| 2586 | CONTIG7 | 427354 | 427638 | 1.17 | 1.44E-01 | transcription_start_site | + | 431013 | 431013 | -3517 | 1629 | AN0517 |
| 2586 | CONTIG7 | 427354 | 427638 | 1.17 | 1.44E-01 | transcription_start_site | + | 431203 | 431203 | -3707 | 1630 | AN0517 |
| 2766 | CONTIG7 | 432164 | 432513 | 1.09 | 1.93E-01 | transcription_start_site | + | 431203 | 431203 | 1135  | 1630 | AN0517 |
| 2766 | CONTIG7 | 432164 | 432513 | 1.09 | 1.93E-01 | transcription_start_site | + | 433629 | 433629 | -1290 | 1631 | AN0517 |
| 2766 | CONTIG7 | 432164 | 432513 | 1.09 | 1.93E-01 | transcription_start_site | + | 434090 | 434090 | -1751 | 1632 | AN0517 |
| 2766 | CONTIG7 | 432164 | 432513 | 1.09 | 1.93E-01 | transcription_start_site | + | 434810 | 434810 | -2471 | 1633 | AN0517 |
| 2766 | CONTIG7 | 432164 | 432513 | 1.09 | 1.93E-01 | transcription_start_site | + | 434959 | 434959 | -2620 | 1634 | AN0517 |
| 2766 | CONTIG7 | 432164 | 432513 | 1.09 | 1.93E-01 | transcription_start_site | + | 435397 | 435397 | -3058 | 1635 | AN0517 |
| 2766 | CONTIG7 | 432164 | 432513 | 1.09 | 1.93E-01 | transcription_start_site | + | 435564 | 435564 | -3225 | 1636 | AN0517 |
| 2766 | CONTIG7 | 432164 | 432513 | 1.09 | 1.93E-01 | transcription_start_site | + | 435719 | 435719 | -3380 | 1637 | AN0517 |
| 2766 | CONTIG7 | 432164 | 432513 | 1.09 | 1.93E-01 | transcription_start_site | + | 436136 | 436136 | -3797 | 1638 | AN0517 |
| 1941 | CONTIG7 | 434701 | 435800 | 1.39 | 6.84E-02 | transcription_start_site | + | 436618 | 436618 | -1367 | 1639 | AN0518 |
| 2190 | CONTIG7 | 436591 | 436850 | 1.3  | 9.24E-02 | transcription_start_site | + | 436618 | 436618 | 102   | 1639 | AN0518 |
| 2766 | CONTIG7 | 432164 | 432513 | 1.09 | 1.93E-01 | transcription_start_site | + | 436618 | 436618 | -4279 | 1639 | AN0518 |
| 1941 | CONTIG7 | 434701 | 435800 | 1.39 | 6.84E-02 | transcription_start_site | + | 439478 | 439478 | -4227 | 1640 | AN0519 |
| 1941 | CONTIG7 | 434701 | 435800 | 1.39 | 6.84E-02 | transcription_start_site | + | 439582 | 439582 | -4331 | 1641 | AN0519 |
| 1941 | CONTIG7 | 434701 | 435800 | 1.39 | 6.84E-02 | transcription_start_site | + | 440042 | 440042 | -4791 | 1642 | AN0519 |
| 1941 | CONTIG7 | 434701 | 435800 | 1.39 | 6.84E-02 | transcription_start_site | + | 440302 | 440302 | -5051 | 1643 | AN0519 |
| 2190 | CONTIG7 | 436591 | 436850 | 1.3  | 9.24E-02 | transcription_start_site | + | 439478 | 439478 | -2757 | 1640 | AN0519 |
| 2190 | CONTIG7 | 436591 | 436850 | 1.3  | 9.24E-02 | transcription_start_site | + | 439582 | 439582 | -2861 | 1641 | AN0519 |
| 2190 | CONTIG7 | 436591 | 436850 | 1.3  | 9.24E-02 | transcription_start_site | + | 440042 | 440042 | -3321 | 1642 | AN0519 |
| 2190 | CONTIG7 | 436591 | 436850 | 1.3  | 9.24E-02 | transcription_start_site | + | 440302 | 440302 | -3581 | 1643 | AN0519 |
| 947  | CONTIG7 | 508741 | 509232 | 1.96 | 7.85E-03 | transcription_start_site | - | 507869 | 507869 | -1117 | 1713 | AN0544 |
| 947  | CONTIG7 | 508741 | 509232 | 1.96 | 7.85E-03 | transcription_start_site | - | 507680 | 507680 | -1306 | 1714 | AN0544 |
| 947  | CONTIG7 | 508741 | 509232 | 1.96 | 7.85E-03 | transcription_start_site | - | 507580 | 507580 | -1406 | 1715 | AN0544 |
| 947  | CONTIG7 | 508741 | 509232 | 1.96 | 7.85E-03 | transcription_start_site | - | 507418 | 507418 | -1568 | 1716 | AN0544 |
| 947  | CONTIG7 | 508741 | 509232 | 1.96 | 7.85E-03 | transcription_start_site | + | 510718 | 510718 | -1731 | 1717 | AN0545 |
| 947  | CONTIG7 | 508741 | 509232 | 1.96 | 7.85E-03 | transcription_start_site | + | 510788 | 510788 | -1801 | 1718 | AN0545 |
| 947  | CONTIG7 | 508741 | 509232 | 1.96 | 7.85E-03 | transcription_start_site | + | 511100 | 511100 | -2113 | 1719 | AN0545 |
| 947  | CONTIG7 | 508741 | 509232 | 1.96 | 7.85E-03 | transcription_start_site | + | 511277 | 511277 | -2290 | 1720 | AN0545 |
| 766  | CONTIG7 | 547596 | 547935 | 2.13 | 3.61E-03 | transcription_start_site | - | 547187 | 547187 | -578  | 1755 | AN0554 |
| 766  | CONTIG7 | 547596 | 547935 | 2.13 | 3.61E-03 | transcription_start_site | - | 547060 | 547060 | -705  | 1756 | AN0554 |
| 766  | CONTIG7 | 547596 | 547935 | 2.13 | 3.61E-03 | transcription_start_site | - | 545804 | 545804 | -1961 | 1757 | AN0554 |
| 2436 | CONTIG7 | 551046 | 551600 | 1.22 | 1.07E-01 | transcription_start_site | - | 547187 | 547187 | -4136 | 1755 | AN0554 |

|      |         |        |        |      |          |                          |   |        |        |       |      |        |
|------|---------|--------|--------|------|----------|--------------------------|---|--------|--------|-------|------|--------|
| 2436 | CONTIG7 | 551046 | 551600 | 1.22 | 1.07E-01 | transcription_start_site | - | 547060 | 547060 | -4263 | 1756 | AN0554 |
| 2436 | CONTIG7 | 551046 | 551600 | 1.22 | 1.07E-01 | transcription_start_site | - | 552370 | 552370 | 1047  | 1761 | AN0556 |
| 2436 | CONTIG7 | 551046 | 551600 | 1.22 | 1.07E-01 | transcription_start_site | + | 555440 | 555440 | -4117 | 1762 | AN0557 |
| 2436 | CONTIG7 | 551046 | 551600 | 1.22 | 1.07E-01 | transcription_start_site | + | 555805 | 555805 | -4482 | 1763 | AN0557 |
| 2331 | CONTIG7 | 566338 | 566762 | 1.26 | 1.08E-01 | transcription_start_site | - | 562812 | 562812 | -3738 | 1768 | AN0559 |
| 2331 | CONTIG7 | 566338 | 566762 | 1.26 | 1.08E-01 | transcription_start_site | - | 562688 | 562688 | -3862 | 1769 | AN0559 |
| 2331 | CONTIG7 | 566338 | 566762 | 1.26 | 1.08E-01 | transcription_start_site | - | 562383 | 562383 | -4167 | 1770 | AN0559 |
| 2331 | CONTIG7 | 566338 | 566762 | 1.26 | 1.08E-01 | transcription_start_site | + | 565491 | 565491 | 1059  | 1774 | AN0560 |
| 813  | CONTIG7 | 569263 | 569602 | 2.09 | 4.61E-03 | transcription_start_site | - | 567984 | 567984 | -1448 | 1775 | AN0561 |
| 813  | CONTIG7 | 569263 | 569602 | 2.09 | 4.61E-03 | transcription_start_site | - | 567200 | 567200 | -2232 | 1776 | AN0561 |
| 2331 | CONTIG7 | 566338 | 566762 | 1.26 | 1.08E-01 | transcription_start_site | - | 567200 | 567200 | 650   | 1776 | AN0561 |
| 813  | CONTIG7 | 569263 | 569602 | 2.09 | 4.61E-03 | transcription_start_site | + | 569024 | 569024 | 408   | 1778 | AN0562 |
| 813  | CONTIG7 | 569263 | 569602 | 2.09 | 4.61E-03 | transcription_start_site | + | 568668 | 568668 | 764   | 1777 | AN0562 |
| 813  | CONTIG7 | 569263 | 569602 | 2.09 | 4.61E-03 | transcription_start_site | + | 570255 | 570255 | -822  | 1779 | AN0562 |
| 2331 | CONTIG7 | 566338 | 566762 | 1.26 | 1.08E-01 | transcription_start_site | + | 568668 | 568668 | -2118 | 1777 | AN0562 |
| 2331 | CONTIG7 | 566338 | 566762 | 1.26 | 1.08E-01 | transcription_start_site | + | 569024 | 569024 | -2474 | 1778 | AN0562 |
| 2331 | CONTIG7 | 566338 | 566762 | 1.26 | 1.08E-01 | transcription_start_site | + | 570255 | 570255 | -3705 | 1779 | AN0562 |
| 861  | CONTIG7 | 582546 | 583115 | 2.04 | 2.32E-03 | transcription_start_site | - | 582210 | 582210 | -620  | 1789 | AN0565 |
| 861  | CONTIG7 | 582546 | 583115 | 2.04 | 2.32E-03 | transcription_start_site | - | 581439 | 581439 | -1391 | 1790 | AN0565 |
| 861  | CONTIG7 | 582546 | 583115 | 2.04 | 2.32E-03 | transcription_start_site | + | 583866 | 583866 | -1035 | 1791 | AN0566 |
| 861  | CONTIG7 | 582546 | 583115 | 2.04 | 2.32E-03 | transcription_start_site | + | 584172 | 584172 | -1341 | 1792 | AN0566 |
| 2767 | CONTIG7 | 596643 | 596992 | 1.09 | 1.93E-01 | transcription_start_site | - | 593702 | 593702 | -3115 | 1800 | AN0568 |
| 2767 | CONTIG7 | 596643 | 596992 | 1.09 | 1.93E-01 | transcription_start_site | - | 597778 | 597778 | 960   | 1801 | AN0569 |
| 2767 | CONTIG7 | 596643 | 596992 | 1.09 | 1.93E-01 | transcription_start_site | - | 595358 | 595358 | -1459 | 1802 | AN0569 |
| 2767 | CONTIG7 | 596643 | 596992 | 1.09 | 1.93E-01 | transcription_start_site | + | 598313 | 598313 | -1495 | 1803 | AN0570 |
| 2767 | CONTIG7 | 596643 | 596992 | 1.09 | 1.93E-01 | transcription_start_site | + | 598492 | 598492 | -1674 | 1804 | AN0570 |
| 2767 | CONTIG7 | 596643 | 596992 | 1.09 | 1.93E-01 | transcription_start_site | + | 598757 | 598757 | -1939 | 1805 | AN0570 |
| 2439 | CONTIG7 | 606683 | 607102 | 1.22 | 1.25E-01 | transcription_start_site | - | 603171 | 603171 | -3721 | 1807 | AN0572 |
| 2439 | CONTIG7 | 606683 | 607102 | 1.22 | 1.25E-01 | transcription_start_site | - | 607162 | 607162 | 269   | 1808 | AN0573 |
| 2439 | CONTIG7 | 606683 | 607102 | 1.22 | 1.25E-01 | transcription_start_site | + | 608031 | 608031 | -1138 | 1809 | AN0574 |
| 2439 | CONTIG7 | 606683 | 607102 | 1.22 | 1.25E-01 | transcription_start_site | + | 608398 | 608398 | -1505 | 1810 | AN0574 |
| 2439 | CONTIG7 | 606683 | 607102 | 1.22 | 1.25E-01 | transcription_start_site | + | 608585 | 608585 | -1692 | 1811 | AN0574 |
| 897  | CONTIG7 | 613213 | 613712 | 2    | 2.49E-03 | transcription_start_site | - | 612750 | 612750 | -712  | 1812 | AN0575 |
| 897  | CONTIG7 | 613213 | 613712 | 2    | 2.49E-03 | transcription_start_site | - | 612319 | 612319 | -1143 | 1813 | AN0575 |
| 897  | CONTIG7 | 613213 | 613712 | 2    | 2.49E-03 | transcription_start_site | - | 611252 | 611252 | -2210 | 1814 | AN0575 |
| 2332 | CONTIG7 | 612613 | 613187 | 1.26 | 1.08E-01 | transcription_start_site | - | 612750 | 612750 | -150  | 1812 | AN0575 |
| 2332 | CONTIG7 | 612613 | 613187 | 1.26 | 1.08E-01 | transcription_start_site | - | 612319 | 612319 | -581  | 1813 | AN0575 |
| 2332 | CONTIG7 | 612613 | 613187 | 1.26 | 1.08E-01 | transcription_start_site | - | 611252 | 611252 | -1648 | 1814 | AN0575 |
| 1936 | CONTIG7 | 647345 | 648144 | 1.39 | 5.05E-02 | transcription_start_site | - | 645103 | 645103 | -2641 | 1847 | AN0584 |
| 1936 | CONTIG7 | 647345 | 648144 | 1.39 | 5.05E-02 | transcription_start_site | - | 644508 | 644508 | -3236 | 1848 | AN0584 |
| 1936 | CONTIG7 | 647345 | 648144 | 1.39 | 5.05E-02 | transcription_start_site | + | 647433 | 647433 | 311   | 1850 | AN0585 |
| 1936 | CONTIG7 | 647345 | 648144 | 1.39 | 5.05E-02 | transcription_start_site | + | 646744 | 646744 | 1000  | 1849 | AN0585 |
| 1233 | CONTIG7 | 690918 | 691252 | 1.74 | 1.84E-02 | transcription_start_site | - | 688881 | 688881 | -2204 | 1880 | AN0594 |
| 1233 | CONTIG7 | 690918 | 691252 | 1.74 | 1.84E-02 | transcription_start_site | - | 688116 | 688116 | -2969 | 1881 | AN0594 |
| 1233 | CONTIG7 | 690918 | 691252 | 1.74 | 1.84E-02 | transcription_start_site | - | 687829 | 687829 | -3256 | 1882 | AN0594 |
| 1942 | CONTIG7 | 688578 | 688852 | 1.39 | 6.84E-02 | transcription_start_site | - | 688881 | 688881 | 166   | 1880 | AN0594 |
| 1942 | CONTIG7 | 688578 | 688852 | 1.39 | 6.84E-02 | transcription_start_site | - | 688116 | 688116 | -599  | 1881 | AN0594 |
| 1942 | CONTIG7 | 688578 | 688852 | 1.39 | 6.84E-02 | transcription_start_site | - | 687829 | 687829 | -886  | 1882 | AN0594 |
| 1942 | CONTIG7 | 688578 | 688852 | 1.39 | 6.84E-02 | transcription_start_site | - | 684481 | 684481 | -4234 | 1883 | AN0594 |
| 1233 | CONTIG7 | 690918 | 691252 | 1.74 | 1.84E-02 | transcription_start_site | + | 691645 | 691645 | -560  | 1884 | AN0595 |
| 1233 | CONTIG7 | 690918 | 691252 | 1.74 | 1.84E-02 | transcription_start_site | + | 693499 | 693499 | -2414 | 1885 | AN0595 |
| 1942 | CONTIG7 | 688578 | 688852 | 1.39 | 6.84E-02 | transcription_start_site | + | 691645 | 691645 | -2930 | 1884 | AN0595 |
| 1942 | CONTIG7 | 688578 | 688852 | 1.39 | 6.84E-02 | transcription_start_site | + | 693499 | 693499 | -4784 | 1885 | AN0595 |
| 1233 | CONTIG7 | 690918 | 691252 | 1.74 | 1.84E-02 | transcription_start_site | + | 694485 | 694485 | -3400 | 1886 | AN0596 |
| 1233 | CONTIG7 | 690918 | 691252 | 1.74 | 1.84E-02 | transcription_start_site | + | 694659 | 694659 | -3574 | 1887 | AN0596 |
| 1233 | CONTIG7 | 690918 | 691252 | 1.74 | 1.84E-02 | transcription_start_site | + | 695362 | 695362 | -4277 | 1888 | AN0596 |
| 236  | CONTIG7 | 703369 | 703786 | 2.87 | 0.00E+00 | transcription_start_site | - | 699227 | 699227 | -4350 | 1891 | AN0597 |



|      |         |        |        |      |          |                          |   |        |        |       |      |        |
|------|---------|--------|--------|------|----------|--------------------------|---|--------|--------|-------|------|--------|
| 236  | CONTIG7 | 703369 | 703786 | 2.87 | 0.00E+00 | transcription_start_site | + | 702507 | 702507 | 1070  | 1898 | AN0599 |
| 236  | CONTIG7 | 703369 | 703786 | 2.87 | 0.00E+00 | transcription_start_site | + | 703846 | 703846 | -268  | 1899 | AN0600 |
| 236  | CONTIG7 | 703369 | 703786 | 2.87 | 0.00E+00 | transcription_start_site | + | 704343 | 704343 | -765  | 1900 | AN0600 |
| 236  | CONTIG7 | 703369 | 703786 | 2.87 | 0.00E+00 | transcription_start_site | + | 705730 | 705730 | -2152 | 1901 | AN0601 |
| 236  | CONTIG7 | 703369 | 703786 | 2.87 | 0.00E+00 | transcription_start_site | + | 705924 | 705924 | -2346 | 1902 | AN0601 |
| 673  | CONTIG7 | 711762 | 712041 | 2.22 | 2.22E-03 | transcription_start_site | - | 710655 | 710655 | -1246 | 1903 | AN0602 |
| 2049 | CONTIG7 | 709892 | 710466 | 1.35 | 6.16E-02 | transcription_start_site | - | 710655 | 710655 | 476   | 1903 | AN0602 |
| 673  | CONTIG7 | 711762 | 712041 | 2.22 | 2.22E-03 | transcription_start_site | + | 712138 | 712138 | -236  | 1904 | AN0604 |
| 673  | CONTIG7 | 711762 | 712041 | 2.22 | 2.22E-03 | transcription_start_site | + | 712433 | 712433 | -531  | 1905 | AN0604 |
| 2049 | CONTIG7 | 709892 | 710466 | 1.35 | 6.16E-02 | transcription_start_site | + | 712138 | 712138 | -1959 | 1904 | AN0604 |
| 2049 | CONTIG7 | 709892 | 710466 | 1.35 | 6.16E-02 | transcription_start_site | + | 712433 | 712433 | -2254 | 1905 | AN0604 |
| 673  | CONTIG7 | 711762 | 712041 | 2.22 | 2.22E-03 | transcription_start_site | + | 715029 | 715029 | -3127 | 1906 | AN0605 |
| 673  | CONTIG7 | 711762 | 712041 | 2.22 | 2.22E-03 | transcription_start_site | + | 715102 | 715102 | -3200 | 1907 | AN0605 |
| 673  | CONTIG7 | 711762 | 712041 | 2.22 | 2.22E-03 | transcription_start_site | + | 715429 | 715429 | -3527 | 1908 | AN0605 |
| 2049 | CONTIG7 | 709892 | 710466 | 1.35 | 6.16E-02 | transcription_start_site | + | 715029 | 715029 | -4850 | 1906 | AN0605 |
| 2049 | CONTIG7 | 709892 | 710466 | 1.35 | 6.16E-02 | transcription_start_site | + | 715102 | 715102 | -4923 | 1907 | AN0605 |
| 2049 | CONTIG7 | 709892 | 710466 | 1.35 | 6.16E-02 | transcription_start_site | + | 715429 | 715429 | -5250 | 1908 | AN0605 |
| 111  | CONTIG7 | 736744 | 737168 | 3.17 | 0.00E+00 | transcription_start_site | - | 736405 | 736405 | -551  | 1914 | AN0607 |
| 111  | CONTIG7 | 736744 | 737168 | 3.17 | 0.00E+00 | transcription_start_site | - | 735772 | 735772 | -1184 | 1915 | AN0607 |
| 111  | CONTIG7 | 736744 | 737168 | 3.17 | 0.00E+00 | transcription_start_site | - | 733047 | 733047 | -3909 | 1916 | AN0607 |
| 1173 | CONTIG7 | 738304 | 738663 | 1.78 | 1.57E-02 | transcription_start_site | - | 736405 | 736405 | -2078 | 1914 | AN0607 |
| 1173 | CONTIG7 | 738304 | 738663 | 1.78 | 1.57E-02 | transcription_start_site | - | 735772 | 735772 | -2711 | 1915 | AN0607 |
| 1227 | CONTIG7 | 739144 | 740393 | 1.74 | 3.45E-03 | transcription_start_site | - | 736405 | 736405 | -3363 | 1914 | AN0607 |
| 1227 | CONTIG7 | 739144 | 740393 | 1.74 | 3.45E-03 | transcription_start_site | - | 735772 | 735772 | -3996 | 1915 | AN0607 |
| 2324 | CONTIG7 | 740854 | 741743 | 1.26 | 9.26E-02 | transcription_start_site | - | 736405 | 736405 | -4893 | 1914 | AN0607 |
| 111  | CONTIG7 | 736744 | 737168 | 3.17 | 0.00E+00 | transcription_start_site | + | 737167 | 737167 | -211  | 1917 | AN0608 |
| 111  | CONTIG7 | 736744 | 737168 | 3.17 | 0.00E+00 | transcription_start_site | + | 738185 | 738185 | -1229 | 1918 | AN0608 |
| 1173 | CONTIG7 | 738304 | 738663 | 1.78 | 1.57E-02 | transcription_start_site | + | 738185 | 738185 | 298   | 1918 | AN0608 |
| 1227 | CONTIG7 | 739144 | 740393 | 1.74 | 3.45E-03 | transcription_start_site | + | 738185 | 738185 | 1583  | 1918 | AN0608 |
| 1173 | CONTIG7 | 738304 | 738663 | 1.78 | 1.57E-02 | transcription_start_site | - | 739549 | 739549 | 1065  | 1923 | AN0609 |
| 1227 | CONTIG7 | 739144 | 740393 | 1.74 | 3.45E-03 | transcription_start_site | - | 739963 | 739963 | 194   | 1922 | AN0609 |
| 1227 | CONTIG7 | 739144 | 740393 | 1.74 | 3.45E-03 | transcription_start_site | - | 739549 | 739549 | -219  | 1923 | AN0609 |
| 1227 | CONTIG7 | 739144 | 740393 | 1.74 | 3.45E-03 | transcription_start_site | - | 740397 | 740397 | 628   | 1921 | AN0609 |
| 1227 | CONTIG7 | 739144 | 740393 | 1.74 | 3.45E-03 | transcription_start_site | - | 740726 | 740726 | 957   | 1920 | AN0609 |
| 1227 | CONTIG7 | 739144 | 740393 | 1.74 | 3.45E-03 | transcription_start_site | - | 741236 | 741236 | 1467  | 1919 | AN0609 |
| 2324 | CONTIG7 | 740854 | 741743 | 1.26 | 9.26E-02 | transcription_start_site | - | 741236 | 741236 | -62   | 1919 | AN0609 |
| 2324 | CONTIG7 | 740854 | 741743 | 1.26 | 9.26E-02 | transcription_start_site | - | 740726 | 740726 | -572  | 1920 | AN0609 |
| 2324 | CONTIG7 | 740854 | 741743 | 1.26 | 9.26E-02 | transcription_start_site | - | 740397 | 740397 | -901  | 1921 | AN0609 |
| 2324 | CONTIG7 | 740854 | 741743 | 1.26 | 9.26E-02 | transcription_start_site | - | 739963 | 739963 | -1335 | 1922 | AN0609 |
| 2324 | CONTIG7 | 740854 | 741743 | 1.26 | 9.26E-02 | transcription_start_site | - | 739549 | 739549 | -1749 | 1923 | AN0609 |
| 1227 | CONTIG7 | 739144 | 740393 | 1.74 | 3.45E-03 | transcription_start_site | + | 745209 | 745209 | -5440 | 1924 | AN0610 |
| 1227 | CONTIG7 | 739144 | 740393 | 1.74 | 3.45E-03 | transcription_start_site | + | 745344 | 745344 | -5575 | 1925 | AN0610 |
| 1827 | CONTIG7 | 746569 | 746988 | 1.44 | 5.88E-02 | transcription_start_site | + | 746320 | 746320 | 458   | 1929 | AN0610 |
| 1827 | CONTIG7 | 746569 | 746988 | 1.44 | 5.88E-02 | transcription_start_site | + | 745715 | 745715 | 1063  | 1928 | AN0610 |
| 2324 | CONTIG7 | 740854 | 741743 | 1.26 | 9.26E-02 | transcription_start_site | + | 745209 | 745209 | -3910 | 1924 | AN0610 |
| 2324 | CONTIG7 | 740854 | 741743 | 1.26 | 9.26E-02 | transcription_start_site | + | 745344 | 745344 | -4045 | 1925 | AN0610 |
| 2324 | CONTIG7 | 740854 | 741743 | 1.26 | 9.26E-02 | transcription_start_site | + | 745438 | 745438 | -4139 | 1926 | AN0610 |
| 2324 | CONTIG7 | 740854 | 741743 | 1.26 | 9.26E-02 | transcription_start_site | + | 745554 | 745554 | -4255 | 1927 | AN0610 |
| 2324 | CONTIG7 | 740854 | 741743 | 1.26 | 9.26E-02 | transcription_start_site | + | 745715 | 745715 | -4416 | 1928 | AN0610 |
| 2324 | CONTIG7 | 740854 | 741743 | 1.26 | 9.26E-02 | transcription_start_site | + | 746320 | 746320 | -5021 | 1929 | AN0610 |
| 2768 | CONTIG7 | 767419 | 768291 | 1.09 | 1.93E-01 | transcription_start_site | - | 762838 | 762838 | -5017 | 1946 | AN0618 |
| 2768 | CONTIG7 | 767419 | 768291 | 1.09 | 1.93E-01 | transcription_start_site | - | 762460 | 762460 | -5395 | 1947 | AN0618 |
| 2768 | CONTIG7 | 767419 | 768291 | 1.09 | 1.93E-01 | transcription_start_site | - | 767467 | 767467 | -388  | 1953 | AN0620 |
| 2768 | CONTIG7 | 767419 | 768291 | 1.09 | 1.93E-01 | transcription_start_site | - | 767155 | 767155 | -700  | 1954 | AN0620 |
| 2768 | CONTIG7 | 767419 | 768291 | 1.09 | 1.93E-01 | transcription_start_site | - | 766685 | 766685 | -1170 | 1955 | AN0620 |
| 2768 | CONTIG7 | 767419 | 768291 | 1.09 | 1.93E-01 | transcription_start_site | - | 769075 | 769075 | 1220  | 1957 | AN0621 |
| 1570 | CONTIG8 | 12245  | 12654  | 1.56 | 1.93E-01 | transcription_start_site | - | 7375   | 7375   | -5074 | 1958 | AN0623 |

|      |         |       |       |      |          |                          |   |       |       |       |      |        |
|------|---------|-------|-------|------|----------|--------------------------|---|-------|-------|-------|------|--------|
| 11   | CONTIG8 | 16060 | 16559 | 3.69 | 6.10E-04 | transcription_start_site | - | 12132 | 12132 | -4177 | 1964 | AN0625 |
| 11   | CONTIG8 | 16060 | 16559 | 3.69 | 6.10E-04 | transcription_start_site | - | 11836 | 11836 | -4473 | 1965 | AN0625 |
| 268  | CONTIG8 | 16745 | 17379 | 2.81 | 7.85E-03 | transcription_start_site | - | 12132 | 12132 | -4930 | 1964 | AN0625 |
| 268  | CONTIG8 | 16745 | 17379 | 2.81 | 7.85E-03 | transcription_start_site | - | 11836 | 11836 | -5226 | 1965 | AN0625 |
| 1135 | CONTIG8 | 13885 | 14234 | 1.81 | 1.08E-01 | transcription_start_site | - | 12132 | 12132 | -1927 | 1964 | AN0625 |
| 1135 | CONTIG8 | 13885 | 14234 | 1.81 | 1.08E-01 | transcription_start_site | - | 11836 | 11836 | -2223 | 1965 | AN0625 |
| 1570 | CONTIG8 | 12245 | 12654 | 1.56 | 1.93E-01 | transcription_start_site | - | 12132 | 12132 | -317  | 1964 | AN0625 |
| 1570 | CONTIG8 | 12245 | 12654 | 1.56 | 1.93E-01 | transcription_start_site | - | 11836 | 11836 | -613  | 1965 | AN0625 |
| 1570 | CONTIG8 | 12245 | 12654 | 1.56 | 1.93E-01 | transcription_start_site | + | 12379 | 12379 | 70    | 1966 | AN0626 |
| 11   | CONTIG8 | 16060 | 16559 | 3.69 | 6.10E-04 | transcription_start_site | - | 14631 | 14631 | -1678 | 1967 | AN0627 |
| 11   | CONTIG8 | 16060 | 16559 | 3.69 | 6.10E-04 | transcription_start_site | - | 14016 | 14016 | -2293 | 1968 | AN0627 |
| 268  | CONTIG8 | 16745 | 17379 | 2.81 | 7.85E-03 | transcription_start_site | - | 14631 | 14631 | -2431 | 1967 | AN0627 |
| 268  | CONTIG8 | 16745 | 17379 | 2.81 | 7.85E-03 | transcription_start_site | - | 14016 | 14016 | -3046 | 1968 | AN0627 |
| 1135 | CONTIG8 | 13885 | 14234 | 1.81 | 1.08E-01 | transcription_start_site | - | 14016 | 14016 | -43   | 1968 | AN0627 |
| 1135 | CONTIG8 | 13885 | 14234 | 1.81 | 1.08E-01 | transcription_start_site | - | 14631 | 14631 | 571   | 1967 | AN0627 |
| 11   | CONTIG8 | 16060 | 16559 | 3.69 | 6.10E-04 | transcription_start_site | + | 19076 | 19076 | -2766 | 1969 | AN0628 |
| 268  | CONTIG8 | 16745 | 17379 | 2.81 | 7.85E-03 | transcription_start_site | + | 19076 | 19076 | -2014 | 1969 | AN0628 |
| 1135 | CONTIG8 | 13885 | 14234 | 1.81 | 1.08E-01 | transcription_start_site | + | 19076 | 19076 | -5016 | 1969 | AN0628 |
| 785  | CONTIG8 | 22578 | 22852 | 2.12 | 5.22E-02 | transcription_start_site | - | 21159 | 21159 | -1556 | 1970 | AN0629 |
| 785  | CONTIG8 | 22578 | 22852 | 2.12 | 5.22E-02 | transcription_start_site | - | 21069 | 21069 | -1646 | 1971 | AN0629 |
| 785  | CONTIG8 | 22578 | 22852 | 2.12 | 5.22E-02 | transcription_start_site | - | 20634 | 20634 | -2081 | 1972 | AN0629 |
| 268  | CONTIG8 | 16745 | 17379 | 2.81 | 7.85E-03 | transcription_start_site | + | 21824 | 21824 | -4762 | 1973 | AN0630 |
| 268  | CONTIG8 | 16745 | 17379 | 2.81 | 7.85E-03 | transcription_start_site | + | 21896 | 21896 | -4834 | 1974 | AN0630 |
| 268  | CONTIG8 | 16745 | 17379 | 2.81 | 7.85E-03 | transcription_start_site | + | 22052 | 22052 | -4990 | 1975 | AN0630 |
| 268  | CONTIG8 | 16745 | 17379 | 2.81 | 7.85E-03 | transcription_start_site | + | 22255 | 22255 | -5193 | 1976 | AN0630 |
| 785  | CONTIG8 | 22578 | 22852 | 2.12 | 5.22E-02 | transcription_start_site | + | 22255 | 22255 | 460   | 1976 | AN0630 |
| 785  | CONTIG8 | 22578 | 22852 | 2.12 | 5.22E-02 | transcription_start_site | + | 22052 | 22052 | 663   | 1975 | AN0630 |
| 785  | CONTIG8 | 22578 | 22852 | 2.12 | 5.22E-02 | transcription_start_site | + | 21896 | 21896 | 819   | 1974 | AN0630 |
| 785  | CONTIG8 | 22578 | 22852 | 2.12 | 5.22E-02 | transcription_start_site | + | 21824 | 21824 | 891   | 1973 | AN0630 |
| 642  | CONTIG8 | 27008 | 27352 | 2.25 | 3.70E-02 | transcription_start_site | - | 23394 | 23394 | -3786 | 1977 | AN0631 |
| 642  | CONTIG8 | 27008 | 27352 | 2.25 | 3.70E-02 | transcription_start_site | - | 22528 | 22528 | -4652 | 1978 | AN0631 |
| 785  | CONTIG8 | 22578 | 22852 | 2.12 | 5.22E-02 | transcription_start_site | - | 22528 | 22528 | -187  | 1978 | AN0631 |
| 785  | CONTIG8 | 22578 | 22852 | 2.12 | 5.22E-02 | transcription_start_site | - | 23394 | 23394 | 679   | 1977 | AN0631 |
| 785  | CONTIG8 | 22578 | 22852 | 2.12 | 5.22E-02 | transcription_start_site | + | 23720 | 23720 | -1005 | 1979 | AN0632 |
| 785  | CONTIG8 | 22578 | 22852 | 2.12 | 5.22E-02 | transcription_start_site | + | 24696 | 24696 | -1981 | 1980 | AN0632 |
| 642  | CONTIG8 | 27008 | 27352 | 2.25 | 3.70E-02 | transcription_start_site | - | 26763 | 26763 | -417  | 1981 | AN0633 |
| 642  | CONTIG8 | 27008 | 27352 | 2.25 | 3.70E-02 | transcription_start_site | - | 26640 | 26640 | -540  | 1982 | AN0633 |
| 642  | CONTIG8 | 27008 | 27352 | 2.25 | 3.70E-02 | transcription_start_site | + | 27680 | 27680 | -500  | 1983 | AN0634 |
| 642  | CONTIG8 | 27008 | 27352 | 2.25 | 3.70E-02 | transcription_start_site | + | 27786 | 27786 | -606  | 1984 | AN0634 |
| 785  | CONTIG8 | 22578 | 22852 | 2.12 | 5.22E-02 | transcription_start_site | + | 27680 | 27680 | -4965 | 1983 | AN0634 |
| 785  | CONTIG8 | 22578 | 22852 | 2.12 | 5.22E-02 | transcription_start_site | + | 27786 | 27786 | -5071 | 1984 | AN0634 |
| 642  | CONTIG8 | 27008 | 27352 | 2.25 | 3.70E-02 | transcription_start_site | + | 29125 | 29125 | -1945 | 1985 | AN0635 |
| 642  | CONTIG8 | 27008 | 27352 | 2.25 | 3.70E-02 | transcription_start_site | + | 29307 | 29307 | -2127 | 1986 | AN0635 |
| 642  | CONTIG8 | 27008 | 27352 | 2.25 | 3.70E-02 | transcription_start_site | + | 31866 | 31866 | -4686 | 1992 | AN0637 |
| 1224 | CONTIG8 | 40433 | 40781 | 1.75 | 1.25E-01 | transcription_start_site | - | 36316 | 36316 | -4291 | 1993 | AN0638 |
| 1224 | CONTIG8 | 40433 | 40781 | 1.75 | 1.25E-01 | transcription_start_site | - | 35810 | 35810 | -4797 | 1994 | AN0638 |
| 1224 | CONTIG8 | 40433 | 40781 | 1.75 | 1.25E-01 | transcription_start_site | - | 35672 | 35672 | -4935 | 1995 | AN0638 |
| 1224 | CONTIG8 | 40433 | 40781 | 1.75 | 1.25E-01 | transcription_start_site | - | 40240 | 40240 | -367  | 1998 | AN0640 |
| 1224 | CONTIG8 | 40433 | 40781 | 1.75 | 1.25E-01 | transcription_start_site | - | 39497 | 39497 | -1110 | 1999 | AN0640 |
| 1224 | CONTIG8 | 40433 | 40781 | 1.75 | 1.25E-01 | transcription_start_site | + | 41291 | 41291 | -684  | 2000 | AN0641 |
| 1224 | CONTIG8 | 40433 | 40781 | 1.75 | 1.25E-01 | transcription_start_site | + | 41452 | 41452 | -845  | 2001 | AN0641 |
| 1224 | CONTIG8 | 40433 | 40781 | 1.75 | 1.25E-01 | transcription_start_site | + | 41800 | 41800 | -1193 | 2002 | AN0641 |
| 1224 | CONTIG8 | 40433 | 40781 | 1.75 | 1.25E-01 | transcription_start_site | + | 42015 | 42015 | -1408 | 2003 | AN0641 |
| 2026 | CONTIG9 | 4351  | 4927  | 1.36 | 2.24E-03 | transcription_start_site | - | 1091  | 1091  | -3548 | 2004 | AN0643 |
| 2026 | CONTIG9 | 4351  | 4927  | 1.36 | 2.24E-03 | transcription_start_site | - | 586   | 586   | -4053 | 2005 | AN0643 |
| 2026 | CONTIG9 | 4351  | 4927  | 1.36 | 2.24E-03 | transcription_start_site | - | 4147  | 4147  | -492  | 2006 | AN0644 |
| 2026 | CONTIG9 | 4351  | 4927  | 1.36 | 2.24E-03 | transcription_start_site | - | 3815  | 3815  | -824  | 2007 | AN0644 |

|               |       |       |      |          |                          |   |       |       |       |             |
|---------------|-------|-------|------|----------|--------------------------|---|-------|-------|-------|-------------|
| 2026 CONTIG9  | 4351  | 4927  | 1.36 | 2.24E-03 | transcription_start_site | - | 5102  | 5102  | 463   | 2010 AN0645 |
| 2026 CONTIG9  | 4351  | 4927  | 1.36 | 2.24E-03 | transcription_start_site | - | 5397  | 5397  | 758   | 2009 AN0645 |
| 2026 CONTIG9  | 4351  | 4927  | 1.36 | 2.24E-03 | transcription_start_site | - | 5672  | 5672  | 1033  | 2008 AN0645 |
| 1116 CONTIG10 | 6976  | 7252  | 1.82 | 2.12E-02 | transcription_start_site | + | 6556  | 6556  | 558   | 2015 AN0649 |
| 1116 CONTIG10 | 6976  | 7252  | 1.82 | 2.12E-02 | transcription_start_site | + | 7690  | 7690  | -576  | 2016 AN0649 |
| 1116 CONTIG10 | 6976  | 7252  | 1.82 | 2.12E-02 | transcription_start_site | + | 8050  | 8050  | -936  | 2017 AN0649 |
| 1116 CONTIG10 | 6976  | 7252  | 1.82 | 2.12E-02 | transcription_start_site | + | 8206  | 8206  | -1092 | 2018 AN0649 |
| 1116 CONTIG10 | 6976  | 7252  | 1.82 | 2.12E-02 | transcription_start_site | + | 11257 | 11257 | -4143 | 2019 AN0650 |
| 575 CONTIG10  | 16504 | 16870 | 2.34 | 0.00E+00 | transcription_start_site | - | 15818 | 15818 | -869  | 2025 AN0651 |
| 575 CONTIG10  | 16504 | 16870 | 2.34 | 0.00E+00 | transcription_start_site | - | 15648 | 15648 | -1039 | 2026 AN0651 |
| 575 CONTIG10  | 16504 | 16870 | 2.34 | 0.00E+00 | transcription_start_site | - | 15252 | 15252 | -1435 | 2027 AN0651 |
| 575 CONTIG10  | 16504 | 16870 | 2.34 | 0.00E+00 | transcription_start_site | - | 14643 | 14643 | -2044 | 2028 AN0651 |
| 575 CONTIG10  | 16504 | 16870 | 2.34 | 0.00E+00 | transcription_start_site | - | 17599 | 17599 | 912   | 2031 AN0652 |
| 575 CONTIG10  | 16504 | 16870 | 2.34 | 0.00E+00 | transcription_start_site | + | 18662 | 18662 | -1975 | 2032 AN0653 |
| 575 CONTIG10  | 16504 | 16870 | 2.34 | 0.00E+00 | transcription_start_site | + | 18761 | 18761 | -2074 | 2033 AN0653 |
| 575 CONTIG10  | 16504 | 16870 | 2.34 | 0.00E+00 | transcription_start_site | + | 18946 | 18946 | -2259 | 2034 AN0653 |
| 575 CONTIG10  | 16504 | 16870 | 2.34 | 0.00E+00 | transcription_start_site | + | 19279 | 19279 | -2592 | 2035 AN0653 |
| 985 CONTIG10  | 34730 | 35079 | 1.92 | 7.16E-03 | transcription_start_site | + | 35483 | 35483 | -578  | 2051 AN0660 |
| 985 CONTIG10  | 34730 | 35079 | 1.92 | 7.16E-03 | transcription_start_site | + | 35640 | 35640 | -735  | 2052 AN0660 |
| 985 CONTIG10  | 34730 | 35079 | 1.92 | 7.16E-03 | transcription_start_site | + | 36015 | 36015 | -1110 | 2053 AN0660 |
| 985 CONTIG10  | 34730 | 35079 | 1.92 | 7.16E-03 | transcription_start_site | + | 36080 | 36080 | -1175 | 2054 AN0660 |
| 985 CONTIG10  | 34730 | 35079 | 1.92 | 7.16E-03 | transcription_start_site | + | 36860 | 36860 | -1955 | 2055 AN0660 |
| 985 CONTIG10  | 34730 | 35079 | 1.92 | 7.16E-03 | transcription_start_site | + | 38544 | 38544 | -3639 | 2056 AN0661 |
| 1922 CONTIG10 | 46295 | 46776 | 1.4  | 7.51E-02 | transcription_start_site | - | 42654 | 42654 | -3881 | 2057 AN0662 |
| 1922 CONTIG10 | 46295 | 46776 | 1.4  | 7.51E-02 | transcription_start_site | - | 42537 | 42537 | -3998 | 2058 AN0662 |
| 1922 CONTIG10 | 46295 | 46776 | 1.4  | 7.51E-02 | transcription_start_site | - | 42274 | 42274 | -4261 | 2059 AN0662 |
| 1922 CONTIG10 | 46295 | 46776 | 1.4  | 7.51E-02 | transcription_start_site | - | 41551 | 41551 | -4984 | 2060 AN0662 |
| 1922 CONTIG10 | 46295 | 46776 | 1.4  | 7.51E-02 | transcription_start_site | + | 46909 | 46909 | -373  | 2061 AN0663 |
| 1922 CONTIG10 | 46295 | 46776 | 1.4  | 7.51E-02 | transcription_start_site | + | 47302 | 47302 | -766  | 2062 AN0663 |
| 1922 CONTIG10 | 46295 | 46776 | 1.4  | 7.51E-02 | transcription_start_site | + | 47598 | 47598 | -1062 | 2063 AN0663 |
| 1493 CONTIG10 | 51082 | 51362 | 1.59 | 5.22E-02 | transcription_start_site | + | 52714 | 52714 | -1492 | 2064 AN0664 |
| 950 CONTIG10  | 62102 | 62386 | 1.96 | 1.30E-02 | transcription_start_site | - | 59773 | 59773 | -2471 | 2069 AN0666 |
| 950 CONTIG10  | 62102 | 62386 | 1.96 | 1.30E-02 | transcription_start_site | - | 59471 | 59471 | -2773 | 2070 AN0666 |
| 950 CONTIG10  | 62102 | 62386 | 1.96 | 1.30E-02 | transcription_start_site | - | 59283 | 59283 | -2961 | 2071 AN0666 |
| 950 CONTIG10  | 62102 | 62386 | 1.96 | 1.30E-02 | transcription_start_site | - | 58595 | 58595 | -3649 | 2072 AN0666 |
| 950 CONTIG10  | 62102 | 62386 | 1.96 | 1.30E-02 | transcription_start_site | - | 61763 | 61763 | -481  | 2073 AN0667 |
| 950 CONTIG10  | 62102 | 62386 | 1.96 | 1.30E-02 | transcription_start_site | - | 61674 | 61674 | -570  | 2074 AN0667 |
| 950 CONTIG10  | 62102 | 62386 | 1.96 | 1.30E-02 | transcription_start_site | - | 61594 | 61594 | -650  | 2075 AN0667 |
| 950 CONTIG10  | 62102 | 62386 | 1.96 | 1.30E-02 | transcription_start_site | - | 61444 | 61444 | -800  | 2076 AN0667 |
| 950 CONTIG10  | 62102 | 62386 | 1.96 | 1.30E-02 | transcription_start_site | - | 61155 | 61155 | -1089 | 2077 AN0667 |
| 950 CONTIG10  | 62102 | 62386 | 1.96 | 1.30E-02 | transcription_start_site | + | 62098 | 62098 | 146   | 2078 AN0668 |
| 950 CONTIG10  | 62102 | 62386 | 1.96 | 1.30E-02 | transcription_start_site | + | 62767 | 62767 | -523  | 2079 AN0668 |
| 950 CONTIG10  | 62102 | 62386 | 1.96 | 1.30E-02 | transcription_start_site | + | 63358 | 63358 | -1114 | 2080 AN0668 |
| 2172 CONTIG10 | 68043 | 68302 | 1.31 | 1.25E-01 | transcription_start_site | - | 65616 | 65616 | -2556 | 2081 AN0669 |
| 2172 CONTIG10 | 68043 | 68302 | 1.31 | 1.25E-01 | transcription_start_site | - | 64632 | 64632 | -3540 | 2082 AN0669 |
| 950 CONTIG10  | 62102 | 62386 | 1.96 | 1.30E-02 | transcription_start_site | + | 65976 | 65976 | -3732 | 2083 AN0670 |
| 950 CONTIG10  | 62102 | 62386 | 1.96 | 1.30E-02 | transcription_start_site | + | 67256 | 67256 | -5012 | 2084 AN0670 |
| 2172 CONTIG10 | 68043 | 68302 | 1.31 | 1.25E-01 | transcription_start_site | + | 67256 | 67256 | 916   | 2084 AN0670 |
| 2172 CONTIG10 | 68043 | 68302 | 1.31 | 1.25E-01 | transcription_start_site | + | 68110 | 68110 | 62    | 2085 AN0671 |
| 2172 CONTIG10 | 68043 | 68302 | 1.31 | 1.25E-01 | transcription_start_site | + | 68742 | 68742 | -569  | 2086 AN0671 |
| 2172 CONTIG10 | 68043 | 68302 | 1.31 | 1.25E-01 | transcription_start_site | + | 71884 | 71884 | -3711 | 2092 AN0673 |
| 2172 CONTIG10 | 68043 | 68302 | 1.31 | 1.25E-01 | transcription_start_site | + | 71971 | 71971 | -3798 | 2093 AN0673 |
| 2172 CONTIG10 | 68043 | 68302 | 1.31 | 1.25E-01 | transcription_start_site | + | 72090 | 72090 | -3917 | 2094 AN0673 |
| 2172 CONTIG10 | 68043 | 68302 | 1.31 | 1.25E-01 | transcription_start_site | + | 72353 | 72353 | -4180 | 2095 AN0673 |
| 2172 CONTIG10 | 68043 | 68302 | 1.31 | 1.25E-01 | transcription_start_site | + | 72632 | 72632 | -4459 | 2096 AN0673 |
| 2172 CONTIG10 | 68043 | 68302 | 1.31 | 1.25E-01 | transcription_start_site | + | 73259 | 73259 | -5086 | 2097 AN0673 |
| 990 CONTIG10  | 82820 | 83604 | 1.92 | 1.57E-02 | transcription_start_site | + | 83665 | 83665 | -453  | 2112 AN0677 |

|      |          |        |        |      |          |                          |   |        |        |       |      |        |
|------|----------|--------|--------|------|----------|--------------------------|---|--------|--------|-------|------|--------|
| 1117 | CONTIG10 | 94737  | 95316  | 1.82 | 2.12E-02 | transcription_start_site | + | 93915  | 93915  | 1111  | 2122 | AN0682 |
| 578  | CONTIG10 | 99163  | 99732  | 2.34 | 3.03E-03 | transcription_start_site | + | 98451  | 98451  | 996   | 2124 | AN0683 |
| 614  | CONTIG10 | 96542  | 97104  | 2.29 | 4.46E-04 | transcription_start_site | + | 97424  | 97424  | -601  | 2123 | AN0683 |
| 614  | CONTIG10 | 96542  | 97104  | 2.29 | 4.46E-04 | transcription_start_site | + | 98451  | 98451  | -1628 | 2124 | AN0683 |
| 1117 | CONTIG10 | 94737  | 95316  | 1.82 | 2.12E-02 | transcription_start_site | + | 97424  | 97424  | -2397 | 2123 | AN0683 |
| 1117 | CONTIG10 | 94737  | 95316  | 1.82 | 2.12E-02 | transcription_start_site | + | 98451  | 98451  | -3424 | 2124 | AN0683 |
| 578  | CONTIG10 | 99163  | 99732  | 2.34 | 3.03E-03 | transcription_start_site | + | 100437 | 100437 | -989  | 2125 | AN0684 |
| 614  | CONTIG10 | 96542  | 97104  | 2.29 | 4.46E-04 | transcription_start_site | + | 100437 | 100437 | -3614 | 2125 | AN0684 |
| 578  | CONTIG10 | 99163  | 99732  | 2.34 | 3.03E-03 | transcription_start_site | + | 104151 | 104151 | -4703 | 2126 | AN0685 |
| 220  | CONTIG10 | 117977 | 118930 | 2.9  | 0.00E+00 | transcription_start_site | - | 113039 | 113039 | -5414 | 2134 | AN0688 |
| 2495 | CONTIG10 | 114017 | 114277 | 1.21 | 1.66E-01 | transcription_start_site | - | 113039 | 113039 | -1108 | 2134 | AN0688 |
| 2495 | CONTIG10 | 114017 | 114277 | 1.21 | 1.66E-01 | transcription_start_site | - | 112722 | 112722 | -1425 | 2135 | AN0688 |
| 2495 | CONTIG10 | 114017 | 114277 | 1.21 | 1.66E-01 | transcription_start_site | - | 112525 | 112525 | -1622 | 2136 | AN0688 |
| 2495 | CONTIG10 | 114017 | 114277 | 1.21 | 1.66E-01 | transcription_start_site | - | 112371 | 112371 | -1776 | 2137 | AN0688 |
| 2495 | CONTIG10 | 114017 | 114277 | 1.21 | 1.66E-01 | transcription_start_site | - | 112020 | 112020 | -2127 | 2138 | AN0688 |
| 86   | CONTIG10 | 119189 | 119688 | 3.27 | 0.00E+00 | transcription_start_site | - | 117577 | 117577 | -1861 | 2139 | AN0689 |
| 86   | CONTIG10 | 119189 | 119688 | 3.27 | 0.00E+00 | transcription_start_site | - | 117034 | 117034 | -2404 | 2140 | AN0689 |
| 86   | CONTIG10 | 119189 | 119688 | 3.27 | 0.00E+00 | transcription_start_site | - | 116666 | 116666 | -2772 | 2141 | AN0689 |
| 86   | CONTIG10 | 119189 | 119688 | 3.27 | 0.00E+00 | transcription_start_site | - | 116333 | 116333 | -3105 | 2142 | AN0689 |
| 86   | CONTIG10 | 119189 | 119688 | 3.27 | 0.00E+00 | transcription_start_site | - | 115925 | 115925 | -3513 | 2143 | AN0689 |
| 220  | CONTIG10 | 117977 | 118930 | 2.9  | 0.00E+00 | transcription_start_site | - | 117577 | 117577 | -876  | 2139 | AN0689 |
| 220  | CONTIG10 | 117977 | 118930 | 2.9  | 0.00E+00 | transcription_start_site | - | 117034 | 117034 | -1419 | 2140 | AN0689 |
| 220  | CONTIG10 | 117977 | 118930 | 2.9  | 0.00E+00 | transcription_start_site | - | 116666 | 116666 | -1787 | 2141 | AN0689 |
| 220  | CONTIG10 | 117977 | 118930 | 2.9  | 0.00E+00 | transcription_start_site | - | 116333 | 116333 | -2120 | 2142 | AN0689 |
| 220  | CONTIG10 | 117977 | 118930 | 2.9  | 0.00E+00 | transcription_start_site | - | 115925 | 115925 | -2528 | 2143 | AN0689 |
| 1699 | CONTIG10 | 121809 | 122078 | 1.5  | 6.84E-02 | transcription_start_site | - | 117577 | 117577 | -4366 | 2139 | AN0689 |
| 1699 | CONTIG10 | 121809 | 122078 | 1.5  | 6.84E-02 | transcription_start_site | - | 117034 | 117034 | -4909 | 2140 | AN0689 |
| 86   | CONTIG10 | 119189 | 119688 | 3.27 | 0.00E+00 | transcription_start_site | - | 120027 | 120027 | 588   | 2147 | AN0690 |
| 86   | CONTIG10 | 119189 | 119688 | 3.27 | 0.00E+00 | transcription_start_site | - | 120677 | 120677 | 1238  | 2146 | AN0690 |
| 803  | CONTIG10 | 126389 | 126745 | 2.1  | 7.85E-03 | transcription_start_site | - | 121599 | 121599 | -4968 | 2144 | AN0690 |
| 1174 | CONTIG10 | 124959 | 125326 | 1.78 | 2.62E-02 | transcription_start_site | - | 121599 | 121599 | -3543 | 2144 | AN0690 |
| 1174 | CONTIG10 | 124959 | 125326 | 1.78 | 2.62E-02 | transcription_start_site | - | 121214 | 121214 | -3928 | 2145 | AN0690 |
| 1174 | CONTIG10 | 124959 | 125326 | 1.78 | 2.62E-02 | transcription_start_site | - | 120677 | 120677 | -4465 | 2146 | AN0690 |
| 1174 | CONTIG10 | 124959 | 125326 | 1.78 | 2.62E-02 | transcription_start_site | - | 120027 | 120027 | -5115 | 2147 | AN0690 |
| 1699 | CONTIG10 | 121809 | 122078 | 1.5  | 6.84E-02 | transcription_start_site | - | 121599 | 121599 | -344  | 2144 | AN0690 |
| 1699 | CONTIG10 | 121809 | 122078 | 1.5  | 6.84E-02 | transcription_start_site | - | 121214 | 121214 | -729  | 2145 | AN0690 |
| 1699 | CONTIG10 | 121809 | 122078 | 1.5  | 6.84E-02 | transcription_start_site | - | 120677 | 120677 | -1266 | 2146 | AN0690 |
| 1699 | CONTIG10 | 121809 | 122078 | 1.5  | 6.84E-02 | transcription_start_site | - | 120027 | 120027 | -1916 | 2147 | AN0690 |
| 86   | CONTIG10 | 119189 | 119688 | 3.27 | 0.00E+00 | transcription_start_site | + | 121991 | 121991 | -2552 | 2148 | AN0691 |
| 86   | CONTIG10 | 119189 | 119688 | 3.27 | 0.00E+00 | transcription_start_site | + | 122450 | 122450 | -3011 | 2149 | AN0691 |
| 220  | CONTIG10 | 117977 | 118930 | 2.9  | 0.00E+00 | transcription_start_site | + | 121991 | 121991 | -3537 | 2148 | AN0691 |
| 220  | CONTIG10 | 117977 | 118930 | 2.9  | 0.00E+00 | transcription_start_site | + | 122450 | 122450 | -3996 | 2149 | AN0691 |
| 1699 | CONTIG10 | 121809 | 122078 | 1.5  | 6.84E-02 | transcription_start_site | + | 121991 | 121991 | -47   | 2148 | AN0691 |
| 1699 | CONTIG10 | 121809 | 122078 | 1.5  | 6.84E-02 | transcription_start_site | + | 122450 | 122450 | -506  | 2149 | AN0691 |
| 803  | CONTIG10 | 126389 | 126745 | 2.1  | 7.85E-03 | transcription_start_site | - | 124498 | 124498 | -2069 | 2150 | AN0692 |
| 803  | CONTIG10 | 126389 | 126745 | 2.1  | 7.85E-03 | transcription_start_site | - | 124407 | 124407 | -2160 | 2151 | AN0692 |
| 803  | CONTIG10 | 126389 | 126745 | 2.1  | 7.85E-03 | transcription_start_site | - | 124158 | 124158 | -2409 | 2152 | AN0692 |
| 803  | CONTIG10 | 126389 | 126745 | 2.1  | 7.85E-03 | transcription_start_site | - | 123833 | 123833 | -2734 | 2153 | AN0692 |
| 803  | CONTIG10 | 126389 | 126745 | 2.1  | 7.85E-03 | transcription_start_site | - | 123686 | 123686 | -2881 | 2154 | AN0692 |
| 803  | CONTIG10 | 126389 | 126745 | 2.1  | 7.85E-03 | transcription_start_site | - | 123599 | 123599 | -2968 | 2155 | AN0692 |
| 803  | CONTIG10 | 126389 | 126745 | 2.1  | 7.85E-03 | transcription_start_site | - | 123338 | 123338 | -3229 | 2156 | AN0692 |
| 803  | CONTIG10 | 126389 | 126745 | 2.1  | 7.85E-03 | transcription_start_site | - | 123084 | 123084 | -3483 | 2157 | AN0692 |
| 803  | CONTIG10 | 126389 | 126745 | 2.1  | 7.85E-03 | transcription_start_site | - | 122852 | 122852 | -3715 | 2158 | AN0692 |
| 803  | CONTIG10 | 126389 | 126745 | 2.1  | 7.85E-03 | transcription_start_site | - | 122676 | 122676 | -3891 | 2159 | AN0692 |
| 1174 | CONTIG10 | 124959 | 125326 | 1.78 | 2.62E-02 | transcription_start_site | - | 124498 | 124498 | -644  | 2150 | AN0692 |
| 1174 | CONTIG10 | 124959 | 125326 | 1.78 | 2.62E-02 | transcription_start_site | - | 124407 | 124407 | -735  | 2151 | AN0692 |
| 1174 | CONTIG10 | 124959 | 125326 | 1.78 | 2.62E-02 | transcription_start_site | - | 124158 | 124158 | -984  | 2152 | AN0692 |

|               |        |        |      |          |                          |   |        |        |       |             |
|---------------|--------|--------|------|----------|--------------------------|---|--------|--------|-------|-------------|
| 1174 CONTIG10 | 124959 | 125326 | 1.78 | 2.62E-02 | transcription_start_site | - | 123833 | 123833 | -1309 | 2153 AN0692 |
| 1174 CONTIG10 | 124959 | 125326 | 1.78 | 2.62E-02 | transcription_start_site | - | 123686 | 123686 | -1456 | 2154 AN0692 |
| 1174 CONTIG10 | 124959 | 125326 | 1.78 | 2.62E-02 | transcription_start_site | - | 123599 | 123599 | -1543 | 2155 AN0692 |
| 1174 CONTIG10 | 124959 | 125326 | 1.78 | 2.62E-02 | transcription_start_site | - | 123338 | 123338 | -1804 | 2156 AN0692 |
| 1174 CONTIG10 | 124959 | 125326 | 1.78 | 2.62E-02 | transcription_start_site | - | 123084 | 123084 | -2058 | 2157 AN0692 |
| 1174 CONTIG10 | 124959 | 125326 | 1.78 | 2.62E-02 | transcription_start_site | - | 122852 | 122852 | -2290 | 2158 AN0692 |
| 1174 CONTIG10 | 124959 | 125326 | 1.78 | 2.62E-02 | transcription_start_site | - | 122676 | 122676 | -2466 | 2159 AN0692 |
| 1699 CONTIG10 | 121809 | 122078 | 1.5  | 6.84E-02 | transcription_start_site | - | 122676 | 122676 | 732   | 2159 AN0692 |
| 1699 CONTIG10 | 121809 | 122078 | 1.5  | 6.84E-02 | transcription_start_site | - | 122852 | 122852 | 908   | 2158 AN0692 |
| 803 CONTIG10  | 126389 | 126745 | 2.1  | 7.85E-03 | transcription_start_site | + | 125554 | 125554 | 1013  | 2161 AN0693 |
| 803 CONTIG10  | 126389 | 126745 | 2.1  | 7.85E-03 | transcription_start_site | + | 125390 | 125390 | 1177  | 2160 AN0693 |
| 1174 CONTIG10 | 124959 | 125326 | 1.78 | 2.62E-02 | transcription_start_site | + | 125390 | 125390 | -247  | 2160 AN0693 |
| 1174 CONTIG10 | 124959 | 125326 | 1.78 | 2.62E-02 | transcription_start_site | + | 125554 | 125554 | -411  | 2161 AN0693 |
| 1699 CONTIG10 | 121809 | 122078 | 1.5  | 6.84E-02 | transcription_start_site | + | 125390 | 125390 | -3446 | 2160 AN0693 |
| 1699 CONTIG10 | 121809 | 122078 | 1.5  | 6.84E-02 | transcription_start_site | + | 125554 | 125554 | -3610 | 2161 AN0693 |
| 803 CONTIG10  | 126389 | 126745 | 2.1  | 7.85E-03 | transcription_start_site | + | 126723 | 126723 | -156  | 2162 AN0694 |
| 1174 CONTIG10 | 124959 | 125326 | 1.78 | 2.62E-02 | transcription_start_site | + | 126723 | 126723 | -1580 | 2162 AN0694 |
| 1699 CONTIG10 | 121809 | 122078 | 1.5  | 6.84E-02 | transcription_start_site | + | 126723 | 126723 | -4779 | 2162 AN0694 |
| 803 CONTIG10  | 126389 | 126745 | 2.1  | 7.85E-03 | transcription_start_site | + | 129189 | 129189 | -2622 | 2165 AN0696 |
| 803 CONTIG10  | 126389 | 126745 | 2.1  | 7.85E-03 | transcription_start_site | + | 129440 | 129440 | -2873 | 2166 AN0696 |
| 803 CONTIG10  | 126389 | 126745 | 2.1  | 7.85E-03 | transcription_start_site | + | 129622 | 129622 | -3055 | 2167 AN0696 |
| 1174 CONTIG10 | 124959 | 125326 | 1.78 | 2.62E-02 | transcription_start_site | + | 129189 | 129189 | -4046 | 2165 AN0696 |
| 1174 CONTIG10 | 124959 | 125326 | 1.78 | 2.62E-02 | transcription_start_site | + | 129440 | 129440 | -4297 | 2166 AN0696 |
| 1174 CONTIG10 | 124959 | 125326 | 1.78 | 2.62E-02 | transcription_start_site | + | 129622 | 129622 | -4479 | 2167 AN0696 |
| 1700 CONTIG10 | 137646 | 138125 | 1.5  | 6.84E-02 | transcription_start_site | - | 135221 | 135221 | -2664 | 2168 AN0697 |
| 1700 CONTIG10 | 137646 | 138125 | 1.5  | 6.84E-02 | transcription_start_site | - | 135095 | 135095 | -2790 | 2169 AN0697 |
| 1700 CONTIG10 | 137646 | 138125 | 1.5  | 6.84E-02 | transcription_start_site | - | 134934 | 134934 | -2951 | 2170 AN0697 |
| 1700 CONTIG10 | 137646 | 138125 | 1.5  | 6.84E-02 | transcription_start_site | - | 134746 | 134746 | -3139 | 2171 AN0697 |
| 1700 CONTIG10 | 137646 | 138125 | 1.5  | 6.84E-02 | transcription_start_site | - | 134670 | 134670 | -3215 | 2172 AN0697 |
| 1700 CONTIG10 | 137646 | 138125 | 1.5  | 6.84E-02 | transcription_start_site | - | 134025 | 134025 | -3860 | 2173 AN0697 |
| 1700 CONTIG10 | 137646 | 138125 | 1.5  | 6.84E-02 | transcription_start_site | - | 133602 | 133602 | -4283 | 2174 AN0697 |
| 1700 CONTIG10 | 137646 | 138125 | 1.5  | 6.84E-02 | transcription_start_site | - | 133467 | 133467 | -4418 | 2175 AN0697 |
| 1700 CONTIG10 | 137646 | 138125 | 1.5  | 6.84E-02 | transcription_start_site | - | 133314 | 133314 | -4571 | 2176 AN0697 |
| 2597 CONTIG10 | 136896 | 137225 | 1.17 | 1.79E-01 | transcription_start_site | - | 135221 | 135221 | -1839 | 2168 AN0697 |
| 2597 CONTIG10 | 136896 | 137225 | 1.17 | 1.79E-01 | transcription_start_site | - | 135095 | 135095 | -1965 | 2169 AN0697 |
| 2597 CONTIG10 | 136896 | 137225 | 1.17 | 1.79E-01 | transcription_start_site | - | 134934 | 134934 | -2126 | 2170 AN0697 |
| 2597 CONTIG10 | 136896 | 137225 | 1.17 | 1.79E-01 | transcription_start_site | - | 134746 | 134746 | -2314 | 2171 AN0697 |
| 2597 CONTIG10 | 136896 | 137225 | 1.17 | 1.79E-01 | transcription_start_site | - | 134670 | 134670 | -2390 | 2172 AN0697 |
| 2597 CONTIG10 | 136896 | 137225 | 1.17 | 1.79E-01 | transcription_start_site | - | 134025 | 134025 | -3035 | 2173 AN0697 |
| 2597 CONTIG10 | 136896 | 137225 | 1.17 | 1.79E-01 | transcription_start_site | - | 133602 | 133602 | -3458 | 2174 AN0697 |
| 2597 CONTIG10 | 136896 | 137225 | 1.17 | 1.79E-01 | transcription_start_site | - | 133467 | 133467 | -3593 | 2175 AN0697 |
| 2597 CONTIG10 | 136896 | 137225 | 1.17 | 1.79E-01 | transcription_start_site | - | 133314 | 133314 | -3746 | 2176 AN0697 |
| 1700 CONTIG10 | 137646 | 138125 | 1.5  | 6.84E-02 | transcription_start_site | - | 138994 | 138994 | 1108  | 2177 AN0698 |
| 1813 CONTIG10 | 151351 | 151635 | 1.45 | 8.01E-02 | transcription_start_site | - | 147684 | 147684 | -3809 | 2183 AN0700 |
| 1813 CONTIG10 | 151351 | 151635 | 1.45 | 8.01E-02 | transcription_start_site | - | 146922 | 146922 | -4571 | 2184 AN0700 |
| 227 CONTIG11  | 7651   | 8087   | 2.89 | 8.69E-04 | transcription_start_site | - | 7662   | 7662   | -207  | 2212 AN0709 |
| 722 CONTIG11  | 8564   | 8978   | 2.18 | 1.11E-02 | transcription_start_site | - | 7662   | 7662   | -1109 | 2212 AN0709 |
| 917 CONTIG11  | 10429  | 12428  | 1.98 | 0.00E+00 | transcription_start_site | - | 7662   | 7662   | -3766 | 2212 AN0709 |
| 723 CONTIG11  | 26120  | 26394  | 2.18 | 1.11E-02 | transcription_start_site | - | 22386  | 22386  | -3871 | 2215 AN0711 |
| 1437 CONTIG11 | 27020  | 27279  | 1.62 | 6.84E-02 | transcription_start_site | - | 22386  | 22386  | -4763 | 2215 AN0711 |
| 723 CONTIG11  | 26120  | 26394  | 2.18 | 1.11E-02 | transcription_start_site | + | 26567  | 26567  | -310  | 2222 AN0713 |
| 1437 CONTIG11 | 27020  | 27279  | 1.62 | 6.84E-02 | transcription_start_site | + | 26567  | 26567  | 582   | 2222 AN0713 |
| 723 CONTIG11  | 26120  | 26394  | 2.18 | 1.11E-02 | transcription_start_site | + | 30019  | 30019  | -3762 | 2223 AN0714 |
| 1437 CONTIG11 | 27020  | 27279  | 1.62 | 6.84E-02 | transcription_start_site | + | 30019  | 30019  | -2869 | 2223 AN0714 |
| 1658 CONTIG11 | 60456  | 60739  | 1.52 | 9.24E-02 | transcription_start_site | - | 58016  | 58016  | -2581 | 2253 AN0725 |
| 1658 CONTIG11 | 60456  | 60739  | 1.52 | 9.24E-02 | transcription_start_site | - | 57822  | 57822  | -2775 | 2254 AN0725 |
| 1658 CONTIG11 | 60456  | 60739  | 1.52 | 9.24E-02 | transcription_start_site | - | 60037  | 60037  | -560  | 2255 AN0726 |

|      |          |       |       |      |          |                          |   |       |       |       |      |        |
|------|----------|-------|-------|------|----------|--------------------------|---|-------|-------|-------|------|--------|
| 1658 | CONTIG11 | 60456 | 60739 | 1.52 | 9.24E-02 | transcription_start_site | - | 59673 | 59673 | -924  | 2256 | AN0726 |
| 1658 | CONTIG11 | 60456 | 60739 | 1.52 | 9.24E-02 | transcription_start_site | - | 59390 | 59390 | -1207 | 2257 | AN0726 |
| 301  | CONTIG12 | 20251 | 20768 | 2.76 | 2.16E-04 | transcription_start_site | - | 15828 | 15828 | -4681 | 2260 | AN0730 |
| 301  | CONTIG12 | 20251 | 20768 | 2.76 | 2.16E-04 | transcription_start_site | - | 15349 | 15349 | -5160 | 2261 | AN0730 |
| 301  | CONTIG12 | 20251 | 20768 | 2.76 | 2.16E-04 | transcription_start_site | - | 17449 | 17449 | -3060 | 2262 | AN0731 |
| 301  | CONTIG12 | 20251 | 20768 | 2.76 | 2.16E-04 | transcription_start_site | - | 16850 | 16850 | -3659 | 2263 | AN0731 |
| 301  | CONTIG12 | 20251 | 20768 | 2.76 | 2.16E-04 | transcription_start_site | - | 20029 | 20029 | -480  | 2264 | AN0732 |
| 301  | CONTIG12 | 20251 | 20768 | 2.76 | 2.16E-04 | transcription_start_site | - | 19325 | 19325 | -1184 | 2265 | AN0732 |
| 301  | CONTIG12 | 20251 | 20768 | 2.76 | 2.16E-04 | transcription_start_site | - | 18251 | 18251 | -2258 | 2266 | AN0732 |
| 778  | CONTIG12 | 23705 | 24214 | 2.12 | 6.61E-03 | transcription_start_site | - | 20029 | 20029 | -3930 | 2264 | AN0732 |
| 778  | CONTIG12 | 23705 | 24214 | 2.12 | 6.61E-03 | transcription_start_site | - | 19325 | 19325 | -4634 | 2265 | AN0732 |
| 778  | CONTIG12 | 23705 | 24214 | 2.12 | 6.61E-03 | transcription_start_site | - | 23637 | 23637 | -322  | 2267 | AN0733 |
| 778  | CONTIG12 | 23705 | 24214 | 2.12 | 6.61E-03 | transcription_start_site | - | 23518 | 23518 | -441  | 2268 | AN0733 |
| 778  | CONTIG12 | 23705 | 24214 | 2.12 | 6.61E-03 | transcription_start_site | - | 23358 | 23358 | -601  | 2269 | AN0733 |
| 301  | CONTIG12 | 20251 | 20768 | 2.76 | 2.16E-04 | transcription_start_site | + | 24437 | 24437 | -3927 | 2270 | AN0734 |
| 301  | CONTIG12 | 20251 | 20768 | 2.76 | 2.16E-04 | transcription_start_site | + | 24505 | 24505 | -3995 | 2271 | AN0734 |
| 301  | CONTIG12 | 20251 | 20768 | 2.76 | 2.16E-04 | transcription_start_site | + | 24836 | 24836 | -4326 | 2272 | AN0734 |
| 778  | CONTIG12 | 23705 | 24214 | 2.12 | 6.61E-03 | transcription_start_site | + | 24437 | 24437 | -477  | 2270 | AN0734 |
| 778  | CONTIG12 | 23705 | 24214 | 2.12 | 6.61E-03 | transcription_start_site | + | 24505 | 24505 | -545  | 2271 | AN0734 |
| 778  | CONTIG12 | 23705 | 24214 | 2.12 | 6.61E-03 | transcription_start_site | + | 24836 | 24836 | -876  | 2272 | AN0734 |
| 778  | CONTIG12 | 23705 | 24214 | 2.12 | 6.61E-03 | transcription_start_site | + | 26496 | 26496 | -2536 | 2273 | AN0735 |
| 778  | CONTIG12 | 23705 | 24214 | 2.12 | 6.61E-03 | transcription_start_site | + | 26849 | 26849 | -2889 | 2274 | AN0735 |
| 779  | CONTIG12 | 40285 | 40779 | 2.12 | 6.61E-03 | transcription_start_site | - | 35414 | 35414 | -5118 | 2281 | AN0738 |
| 779  | CONTIG12 | 40285 | 40779 | 2.12 | 6.61E-03 | transcription_start_site | - | 40367 | 40367 | -165  | 2287 | AN0740 |
| 779  | CONTIG12 | 40285 | 40779 | 2.12 | 6.61E-03 | transcription_start_site | - | 40292 | 40292 | -240  | 2288 | AN0740 |
| 779  | CONTIG12 | 40285 | 40779 | 2.12 | 6.61E-03 | transcription_start_site | - | 39259 | 39259 | -1273 | 2289 | AN0740 |
| 779  | CONTIG12 | 40285 | 40779 | 2.12 | 6.61E-03 | transcription_start_site | + | 42760 | 42760 | -2228 | 2290 | AN0741 |
| 779  | CONTIG12 | 40285 | 40779 | 2.12 | 6.61E-03 | transcription_start_site | + | 43135 | 43135 | -2603 | 2291 | AN0741 |
| 779  | CONTIG12 | 40285 | 40779 | 2.12 | 6.61E-03 | transcription_start_site | + | 43429 | 43429 | -2897 | 2292 | AN0741 |
| 779  | CONTIG12 | 40285 | 40779 | 2.12 | 6.61E-03 | transcription_start_site | + | 45767 | 45767 | -5235 | 2293 | AN0742 |
| 1464 | CONTIG12 | 45608 | 45892 | 1.61 | 4.36E-02 | transcription_start_site | + | 45767 | 45767 | -17   | 2293 | AN0742 |
| 1464 | CONTIG12 | 45608 | 45892 | 1.61 | 4.36E-02 | transcription_start_site | + | 46127 | 46127 | -377  | 2294 | AN0742 |
| 1464 | CONTIG12 | 45608 | 45892 | 1.61 | 4.36E-02 | transcription_start_site | + | 46204 | 46204 | -454  | 2295 | AN0742 |
| 1464 | CONTIG12 | 45608 | 45892 | 1.61 | 4.36E-02 | transcription_start_site | + | 46374 | 46374 | -624  | 2296 | AN0742 |
| 1464 | CONTIG12 | 45608 | 45892 | 1.61 | 4.36E-02 | transcription_start_site | + | 46800 | 46800 | -1050 | 2297 | AN0742 |
| 1464 | CONTIG12 | 45608 | 45892 | 1.61 | 4.36E-02 | transcription_start_site | + | 47108 | 47108 | -1358 | 2298 | AN0742 |
| 2229 | CONTIG12 | 59938 | 60442 | 1.29 | 1.25E-01 | transcription_start_site | + | 60354 | 60354 | -164  | 2316 | AN0747 |
| 2229 | CONTIG12 | 59938 | 60442 | 1.29 | 1.25E-01 | transcription_start_site | + | 59613 | 59613 | 577   | 2315 | AN0747 |
| 2229 | CONTIG12 | 59938 | 60442 | 1.29 | 1.25E-01 | transcription_start_site | + | 59472 | 59472 | 718   | 2314 | AN0747 |
| 2229 | CONTIG12 | 59938 | 60442 | 1.29 | 1.25E-01 | transcription_start_site | + | 59298 | 59298 | 892   | 2313 | AN0747 |
| 2229 | CONTIG12 | 59938 | 60442 | 1.29 | 1.25E-01 | transcription_start_site | + | 59093 | 59093 | 1097  | 2312 | AN0747 |
| 2229 | CONTIG12 | 59938 | 60442 | 1.29 | 1.25E-01 | transcription_start_site | + | 62385 | 62385 | -2195 | 2317 | AN0748 |
| 2229 | CONTIG12 | 59938 | 60442 | 1.29 | 1.25E-01 | transcription_start_site | + | 62953 | 62953 | -2763 | 2318 | AN0748 |
| 2229 | CONTIG12 | 59938 | 60442 | 1.29 | 1.25E-01 | transcription_start_site | + | 63072 | 63072 | -2882 | 2319 | AN0748 |
| 2229 | CONTIG12 | 59938 | 60442 | 1.29 | 1.25E-01 | transcription_start_site | + | 63535 | 63535 | -3345 | 2320 | AN0748 |
| 2229 | CONTIG12 | 59938 | 60442 | 1.29 | 1.25E-01 | transcription_start_site | + | 63987 | 63987 | -3797 | 2321 | AN0748 |
| 2229 | CONTIG12 | 59938 | 60442 | 1.29 | 1.25E-01 | transcription_start_site | + | 64744 | 64744 | -4554 | 2322 | AN0748 |
| 2517 | CONTIG12 | 68630 | 68919 | 1.2  | 1.66E-01 | transcription_start_site | - | 67608 | 67608 | -1166 | 2323 | AN0749 |
| 1981 | CONTIG12 | 74040 | 74309 | 1.38 | 9.24E-02 | transcription_start_site | + | 74199 | 74199 | -24   | 2333 | AN0750 |
| 1981 | CONTIG12 | 74040 | 74309 | 1.38 | 9.24E-02 | transcription_start_site | + | 73891 | 73891 | 283   | 2332 | AN0750 |
| 1981 | CONTIG12 | 74040 | 74309 | 1.38 | 9.24E-02 | transcription_start_site | + | 74627 | 74627 | -452  | 2334 | AN0750 |
| 1981 | CONTIG12 | 74040 | 74309 | 1.38 | 9.24E-02 | transcription_start_site | + | 73425 | 73425 | 749   | 2331 | AN0750 |
| 2517 | CONTIG12 | 68630 | 68919 | 1.2  | 1.66E-01 | transcription_start_site | + | 68765 | 68765 | 9     | 2327 | AN0750 |
| 2517 | CONTIG12 | 68630 | 68919 | 1.2  | 1.66E-01 | transcription_start_site | + | 68570 | 68570 | 204   | 2326 | AN0750 |
| 2517 | CONTIG12 | 68630 | 68919 | 1.2  | 1.66E-01 | transcription_start_site | + | 68281 | 68281 | 493   | 2325 | AN0750 |
| 2517 | CONTIG12 | 68630 | 68919 | 1.2  | 1.66E-01 | transcription_start_site | + | 68102 | 68102 | 672   | 2324 | AN0750 |
| 2517 | CONTIG12 | 68630 | 68919 | 1.2  | 1.66E-01 | transcription_start_site | + | 71620 | 71620 | -2845 | 2328 | AN0750 |



|      |          |        |        |      |          |                          |   |        |        |       |      |        |
|------|----------|--------|--------|------|----------|--------------------------|---|--------|--------|-------|------|--------|
| 2517 | CONTIG12 | 68630  | 68919  | 1.2  | 1.66E-01 | transcription_start_site | + | 71859  | 71859  | -3084 | 2329 | AN0750 |
| 2517 | CONTIG12 | 68630  | 68919  | 1.2  | 1.66E-01 | transcription_start_site | + | 72842  | 72842  | -4067 | 2330 | AN0750 |
| 2517 | CONTIG12 | 68630  | 68919  | 1.2  | 1.66E-01 | transcription_start_site | + | 73425  | 73425  | -4650 | 2331 | AN0750 |
| 2517 | CONTIG12 | 68630  | 68919  | 1.2  | 1.66E-01 | transcription_start_site | + | 73891  | 73891  | -5116 | 2332 | AN0750 |
| 2221 | CONTIG12 | 81377  | 81881  | 1.29 | 1.07E-01 | transcription_start_site | - | 80479  | 80479  | -1150 | 2335 | AN0751 |
| 2221 | CONTIG12 | 81377  | 81881  | 1.29 | 1.07E-01 | transcription_start_site | - | 80075  | 80075  | -1554 | 2336 | AN0751 |
| 1644 | CONTIG12 | 87752  | 88186  | 1.52 | 5.88E-02 | transcription_start_site | - | 84817  | 84817  | -3152 | 2337 | AN0752 |
| 1644 | CONTIG12 | 87752  | 88186  | 1.52 | 5.88E-02 | transcription_start_site | - | 84662  | 84662  | -3307 | 2338 | AN0752 |
| 1644 | CONTIG12 | 87752  | 88186  | 1.52 | 5.88E-02 | transcription_start_site | - | 84510  | 84510  | -3459 | 2339 | AN0752 |
| 2221 | CONTIG12 | 81377  | 81881  | 1.29 | 1.07E-01 | transcription_start_site | + | 85214  | 85214  | -3585 | 2340 | AN0753 |
| 2221 | CONTIG12 | 81377  | 81881  | 1.29 | 1.07E-01 | transcription_start_site | + | 85450  | 85450  | -3821 | 2341 | AN0753 |
| 2221 | CONTIG12 | 81377  | 81881  | 1.29 | 1.07E-01 | transcription_start_site | + | 86678  | 86678  | -5049 | 2342 | AN0753 |
| 1644 | CONTIG12 | 87752  | 88186  | 1.52 | 5.88E-02 | transcription_start_site | + | 87834  | 87834  | 135   | 2344 | AN0754 |
| 1644 | CONTIG12 | 87752  | 88186  | 1.52 | 5.88E-02 | transcription_start_site | + | 87749  | 87749  | 220   | 2343 | AN0754 |
| 569  | CONTIG12 | 121366 | 121790 | 2.35 | 0.00E+00 | transcription_start_site | - | 118157 | 118157 | -3421 | 2385 | AN0765 |
| 569  | CONTIG12 | 121366 | 121790 | 2.35 | 0.00E+00 | transcription_start_site | - | 117847 | 117847 | -3731 | 2386 | AN0765 |
| 1557 | CONTIG12 | 122196 | 122685 | 1.56 | 5.22E-02 | transcription_start_site | - | 118157 | 118157 | -4283 | 2385 | AN0765 |
| 1557 | CONTIG12 | 122196 | 122685 | 1.56 | 5.22E-02 | transcription_start_site | - | 117847 | 117847 | -4593 | 2386 | AN0765 |
| 569  | CONTIG12 | 121366 | 121790 | 2.35 | 0.00E+00 | transcription_start_site | - | 120946 | 120946 | -632  | 2387 | AN0766 |
| 569  | CONTIG12 | 121366 | 121790 | 2.35 | 0.00E+00 | transcription_start_site | - | 120277 | 120277 | -1301 | 2388 | AN0766 |
| 1557 | CONTIG12 | 122196 | 122685 | 1.56 | 5.22E-02 | transcription_start_site | - | 120946 | 120946 | -1494 | 2387 | AN0766 |
| 1557 | CONTIG12 | 122196 | 122685 | 1.56 | 5.22E-02 | transcription_start_site | - | 120277 | 120277 | -2163 | 2388 | AN0766 |
| 569  | CONTIG12 | 121366 | 121790 | 2.35 | 0.00E+00 | transcription_start_site | + | 122566 | 122566 | -988  | 2389 | AN0767 |
| 569  | CONTIG12 | 121366 | 121790 | 2.35 | 0.00E+00 | transcription_start_site | + | 122838 | 122838 | -1260 | 2390 | AN0767 |
| 569  | CONTIG12 | 121366 | 121790 | 2.35 | 0.00E+00 | transcription_start_site | + | 122962 | 122962 | -1384 | 2391 | AN0767 |
| 1557 | CONTIG12 | 122196 | 122685 | 1.56 | 5.22E-02 | transcription_start_site | + | 122566 | 122566 | -125  | 2389 | AN0767 |
| 1557 | CONTIG12 | 122196 | 122685 | 1.56 | 5.22E-02 | transcription_start_site | + | 122838 | 122838 | -397  | 2390 | AN0767 |
| 1557 | CONTIG12 | 122196 | 122685 | 1.56 | 5.22E-02 | transcription_start_site | + | 122962 | 122962 | -521  | 2391 | AN0767 |
| 569  | CONTIG12 | 121366 | 121790 | 2.35 | 0.00E+00 | transcription_start_site | + | 123693 | 123693 | -2115 | 2392 | AN0768 |
| 569  | CONTIG12 | 121366 | 121790 | 2.35 | 0.00E+00 | transcription_start_site | + | 124583 | 124583 | -3005 | 2393 | AN0768 |
| 1557 | CONTIG12 | 122196 | 122685 | 1.56 | 5.22E-02 | transcription_start_site | + | 123693 | 123693 | -1252 | 2392 | AN0768 |
| 1557 | CONTIG12 | 122196 | 122685 | 1.56 | 5.22E-02 | transcription_start_site | + | 124583 | 124583 | -2142 | 2393 | AN0768 |
| 465  | CONTIG12 | 132087 | 132426 | 2.49 | 1.22E-03 | transcription_start_site | + | 133388 | 133388 | -1131 | 2396 | AN0771 |
| 465  | CONTIG12 | 132087 | 132426 | 2.49 | 1.22E-03 | transcription_start_site | + | 134080 | 134080 | -1823 | 2397 | AN0771 |
| 465  | CONTIG12 | 132087 | 132426 | 2.49 | 1.22E-03 | transcription_start_site | + | 134577 | 134577 | -2320 | 2398 | AN0771 |
| 465  | CONTIG12 | 132087 | 132426 | 2.49 | 1.22E-03 | transcription_start_site | + | 134719 | 134719 | -2462 | 2399 | AN0771 |
| 465  | CONTIG12 | 132087 | 132426 | 2.49 | 1.22E-03 | transcription_start_site | + | 135113 | 135113 | -2856 | 2400 | AN0771 |
| 465  | CONTIG12 | 132087 | 132426 | 2.49 | 1.22E-03 | transcription_start_site | + | 135405 | 135405 | -3148 | 2401 | AN0771 |
| 465  | CONTIG12 | 132087 | 132426 | 2.49 | 1.22E-03 | transcription_start_site | + | 136373 | 136373 | -4116 | 2402 | AN0771 |
| 465  | CONTIG12 | 132087 | 132426 | 2.49 | 1.22E-03 | transcription_start_site | + | 136733 | 136733 | -4476 | 2403 | AN0771 |
| 1548 | CONTIG12 | 146851 | 147215 | 1.56 | 3.33E-02 | transcription_start_site | + | 146071 | 146071 | 962   | 2404 | AN0773 |
| 826  | CONTIG12 | 148971 | 149375 | 2.07 | 7.85E-03 | transcription_start_site | - | 149605 | 149605 | 432   | 2406 | AN0774 |
| 826  | CONTIG12 | 148971 | 149375 | 2.07 | 7.85E-03 | transcription_start_site | - | 149718 | 149718 | 545   | 2405 | AN0774 |
| 2109 | CONTIG12 | 152261 | 152695 | 1.33 | 9.26E-02 | transcription_start_site | - | 149718 | 149718 | -2760 | 2405 | AN0774 |
| 2109 | CONTIG12 | 152261 | 152695 | 1.33 | 9.26E-02 | transcription_start_site | - | 149605 | 149605 | -2873 | 2406 | AN0774 |
| 826  | CONTIG12 | 148971 | 149375 | 2.07 | 7.85E-03 | transcription_start_site | + | 150297 | 150297 | -1124 | 2407 | AN0775 |
| 826  | CONTIG12 | 148971 | 149375 | 2.07 | 7.85E-03 | transcription_start_site | + | 150436 | 150436 | -1263 | 2408 | AN0775 |
| 826  | CONTIG12 | 148971 | 149375 | 2.07 | 7.85E-03 | transcription_start_site | + | 150584 | 150584 | -1411 | 2409 | AN0775 |
| 826  | CONTIG12 | 148971 | 149375 | 2.07 | 7.85E-03 | transcription_start_site | + | 150749 | 150749 | -1576 | 2410 | AN0775 |
| 826  | CONTIG12 | 148971 | 149375 | 2.07 | 7.85E-03 | transcription_start_site | + | 150914 | 150914 | -1741 | 2411 | AN0775 |
| 826  | CONTIG12 | 148971 | 149375 | 2.07 | 7.85E-03 | transcription_start_site | + | 151049 | 151049 | -1876 | 2412 | AN0775 |
| 826  | CONTIG12 | 148971 | 149375 | 2.07 | 7.85E-03 | transcription_start_site | + | 151375 | 151375 | -2202 | 2413 | AN0775 |
| 1548 | CONTIG12 | 146851 | 147215 | 1.56 | 3.33E-02 | transcription_start_site | + | 150297 | 150297 | -3264 | 2407 | AN0775 |
| 1548 | CONTIG12 | 146851 | 147215 | 1.56 | 3.33E-02 | transcription_start_site | + | 150436 | 150436 | -3403 | 2408 | AN0775 |
| 1548 | CONTIG12 | 146851 | 147215 | 1.56 | 3.33E-02 | transcription_start_site | + | 150584 | 150584 | -3551 | 2409 | AN0775 |
| 1548 | CONTIG12 | 146851 | 147215 | 1.56 | 3.33E-02 | transcription_start_site | + | 150749 | 150749 | -3716 | 2410 | AN0775 |
| 1548 | CONTIG12 | 146851 | 147215 | 1.56 | 3.33E-02 | transcription_start_site | + | 150914 | 150914 | -3881 | 2411 | AN0775 |

|      |          |        |        |      |          |                          |   |        |        |       |      |        |
|------|----------|--------|--------|------|----------|--------------------------|---|--------|--------|-------|------|--------|
| 1548 | CONTIG12 | 146851 | 147215 | 1.56 | 3.33E-02 | transcription_start_site | + | 151049 | 151049 | -4016 | 2412 | AN0775 |
| 1548 | CONTIG12 | 146851 | 147215 | 1.56 | 3.33E-02 | transcription_start_site | + | 151375 | 151375 | -4342 | 2413 | AN0775 |
| 2109 | CONTIG12 | 152261 | 152695 | 1.33 | 9.26E-02 | transcription_start_site | + | 151375 | 151375 | 1103  | 2413 | AN0775 |
| 826  | CONTIG12 | 148971 | 149375 | 2.07 | 7.85E-03 | transcription_start_site | + | 151873 | 151873 | -2700 | 2414 | AN0776 |
| 826  | CONTIG12 | 148971 | 149375 | 2.07 | 7.85E-03 | transcription_start_site | + | 152122 | 152122 | -2949 | 2415 | AN0776 |
| 826  | CONTIG12 | 148971 | 149375 | 2.07 | 7.85E-03 | transcription_start_site | + | 152496 | 152496 | -3323 | 2416 | AN0776 |
| 826  | CONTIG12 | 148971 | 149375 | 2.07 | 7.85E-03 | transcription_start_site | + | 152739 | 152739 | -3566 | 2417 | AN0776 |
| 1548 | CONTIG12 | 146851 | 147215 | 1.56 | 3.33E-02 | transcription_start_site | + | 151873 | 151873 | -4840 | 2414 | AN0776 |
| 1548 | CONTIG12 | 146851 | 147215 | 1.56 | 3.33E-02 | transcription_start_site | + | 152122 | 152122 | -5089 | 2415 | AN0776 |
| 2109 | CONTIG12 | 152261 | 152695 | 1.33 | 9.26E-02 | transcription_start_site | + | 152496 | 152496 | -18   | 2416 | AN0776 |
| 2109 | CONTIG12 | 152261 | 152695 | 1.33 | 9.26E-02 | transcription_start_site | + | 152739 | 152739 | -261  | 2417 | AN0776 |
| 2109 | CONTIG12 | 152261 | 152695 | 1.33 | 9.26E-02 | transcription_start_site | + | 152122 | 152122 | 356   | 2415 | AN0776 |
| 2109 | CONTIG12 | 152261 | 152695 | 1.33 | 9.26E-02 | transcription_start_site | + | 151873 | 151873 | 605   | 2414 | AN0776 |
| 826  | CONTIG12 | 148971 | 149375 | 2.07 | 7.85E-03 | transcription_start_site | + | 153840 | 153840 | -4667 | 2418 | AN0777 |
| 826  | CONTIG12 | 148971 | 149375 | 2.07 | 7.85E-03 | transcription_start_site | + | 153931 | 153931 | -4758 | 2419 | AN0777 |
| 826  | CONTIG12 | 148971 | 149375 | 2.07 | 7.85E-03 | transcription_start_site | + | 154046 | 154046 | -4873 | 2420 | AN0777 |
| 826  | CONTIG12 | 148971 | 149375 | 2.07 | 7.85E-03 | transcription_start_site | + | 154134 | 154134 | -4961 | 2421 | AN0777 |
| 2109 | CONTIG12 | 152261 | 152695 | 1.33 | 9.26E-02 | transcription_start_site | + | 153840 | 153840 | -1362 | 2418 | AN0777 |
| 2109 | CONTIG12 | 152261 | 152695 | 1.33 | 9.26E-02 | transcription_start_site | + | 153931 | 153931 | -1453 | 2419 | AN0777 |
| 2109 | CONTIG12 | 152261 | 152695 | 1.33 | 9.26E-02 | transcription_start_site | + | 154046 | 154046 | -1568 | 2420 | AN0777 |
| 2109 | CONTIG12 | 152261 | 152695 | 1.33 | 9.26E-02 | transcription_start_site | + | 154134 | 154134 | -1656 | 2421 | AN0777 |
| 2109 | CONTIG12 | 152261 | 152695 | 1.33 | 9.26E-02 | transcription_start_site | + | 154568 | 154568 | -2090 | 2422 | AN0777 |
| 2109 | CONTIG12 | 152261 | 152695 | 1.33 | 9.26E-02 | transcription_start_site | + | 156376 | 156376 | -3898 | 2423 | AN0778 |
| 2109 | CONTIG12 | 152261 | 152695 | 1.33 | 9.26E-02 | transcription_start_site | + | 157354 | 157354 | -4876 | 2424 | AN0778 |
| 2109 | CONTIG12 | 152261 | 152695 | 1.33 | 9.26E-02 | transcription_start_site | + | 157429 | 157429 | -4951 | 2425 | AN0778 |
| 2230 | CONTIG12 | 156840 | 157189 | 1.29 | 1.25E-01 | transcription_start_site | + | 157354 | 157354 | -339  | 2424 | AN0778 |
| 2230 | CONTIG12 | 156840 | 157189 | 1.29 | 1.25E-01 | transcription_start_site | + | 157429 | 157429 | -414  | 2425 | AN0778 |
| 2230 | CONTIG12 | 156840 | 157189 | 1.29 | 1.25E-01 | transcription_start_site | + | 156376 | 156376 | 638   | 2423 | AN0778 |
| 607  | CONTIG12 | 164942 | 165201 | 2.3  | 3.03E-03 | transcription_start_site | - | 161377 | 161377 | -3694 | 2426 | AN0779 |
| 607  | CONTIG12 | 164942 | 165201 | 2.3  | 3.03E-03 | transcription_start_site | - | 161115 | 161115 | -3956 | 2427 | AN0779 |
| 1160 | CONTIG12 | 159230 | 159659 | 1.79 | 2.12E-02 | transcription_start_site | - | 159652 | 159652 | 207   | 2428 | AN0779 |
| 1549 | CONTIG12 | 163746 | 164455 | 1.56 | 3.33E-02 | transcription_start_site | - | 161377 | 161377 | -2723 | 2426 | AN0779 |
| 1549 | CONTIG12 | 163746 | 164455 | 1.56 | 3.33E-02 | transcription_start_site | - | 161115 | 161115 | -2985 | 2427 | AN0779 |
| 1549 | CONTIG12 | 163746 | 164455 | 1.56 | 3.33E-02 | transcription_start_site | - | 159652 | 159652 | -4448 | 2428 | AN0779 |
| 607  | CONTIG12 | 164942 | 165201 | 2.3  | 3.03E-03 | transcription_start_site | - | 164440 | 164440 | -631  | 2429 | AN0780 |
| 607  | CONTIG12 | 164942 | 165201 | 2.3  | 3.03E-03 | transcription_start_site | - | 163919 | 163919 | -1152 | 2430 | AN0780 |
| 607  | CONTIG12 | 164942 | 165201 | 2.3  | 3.03E-03 | transcription_start_site | - | 163489 | 163489 | -1582 | 2431 | AN0780 |
| 1452 | CONTIG12 | 166592 | 167243 | 1.61 | 2.64E-02 | transcription_start_site | - | 164440 | 164440 | -2477 | 2429 | AN0780 |
| 1452 | CONTIG12 | 166592 | 167243 | 1.61 | 2.64E-02 | transcription_start_site | - | 163919 | 163919 | -2998 | 2430 | AN0780 |
| 1452 | CONTIG12 | 166592 | 167243 | 1.61 | 2.64E-02 | transcription_start_site | - | 163489 | 163489 | -3428 | 2431 | AN0780 |
| 1549 | CONTIG12 | 163746 | 164455 | 1.56 | 3.33E-02 | transcription_start_site | - | 163919 | 163919 | -181  | 2430 | AN0780 |
| 1549 | CONTIG12 | 163746 | 164455 | 1.56 | 3.33E-02 | transcription_start_site | - | 164440 | 164440 | 339   | 2429 | AN0780 |
| 1549 | CONTIG12 | 163746 | 164455 | 1.56 | 3.33E-02 | transcription_start_site | - | 163489 | 163489 | -611  | 2431 | AN0780 |
| 607  | CONTIG12 | 164942 | 165201 | 2.3  | 3.03E-03 | transcription_start_site | + | 166445 | 166445 | -1373 | 2432 | AN0781 |
| 607  | CONTIG12 | 164942 | 165201 | 2.3  | 3.03E-03 | transcription_start_site | + | 167116 | 167116 | -2044 | 2433 | AN0781 |
| 1452 | CONTIG12 | 166592 | 167243 | 1.61 | 2.64E-02 | transcription_start_site | + | 167116 | 167116 | -198  | 2433 | AN0781 |
| 1452 | CONTIG12 | 166592 | 167243 | 1.61 | 2.64E-02 | transcription_start_site | + | 166445 | 166445 | 472   | 2432 | AN0781 |
| 1549 | CONTIG12 | 163746 | 164455 | 1.56 | 3.33E-02 | transcription_start_site | + | 166445 | 166445 | -2344 | 2432 | AN0781 |
| 1549 | CONTIG12 | 163746 | 164455 | 1.56 | 3.33E-02 | transcription_start_site | + | 167116 | 167116 | -3015 | 2433 | AN0781 |
| 607  | CONTIG12 | 164942 | 165201 | 2.3  | 3.03E-03 | transcription_start_site | + | 170038 | 170038 | -4966 | 2434 | AN0782 |
| 1157 | CONTIG12 | 170192 | 170916 | 1.79 | 1.06E-02 | transcription_start_site | + | 170038 | 170038 | 516   | 2434 | AN0782 |
| 1452 | CONTIG12 | 166592 | 167243 | 1.61 | 2.64E-02 | transcription_start_site | + | 170038 | 170038 | -3120 | 2434 | AN0782 |
| 808  | CONTIG13 | 11107  | 11376  | 2.1  | 1.84E-02 | transcription_start_site | - | 6337   | 6337   | -4904 | 2441 | AN0785 |
| 808  | CONTIG13 | 11107  | 11376  | 2.1  | 1.84E-02 | transcription_start_site | - | 6219   | 6219   | -5022 | 2442 | AN0785 |
| 969  | CONTIG13 | 10437  | 10936  | 1.94 | 3.08E-02 | transcription_start_site | - | 6337   | 6337   | -4349 | 2441 | AN0785 |
| 969  | CONTIG13 | 10437  | 10936  | 1.94 | 3.08E-02 | transcription_start_site | - | 6219   | 6219   | -4467 | 2442 | AN0785 |
| 1092 | CONTIG13 | 6677   | 7851   | 1.84 | 2.64E-02 | transcription_start_site | - | 6337   | 6337   | -927  | 2441 | AN0785 |

|               |       |       |      |          |                          |   |       |       |       |      |        |
|---------------|-------|-------|------|----------|--------------------------|---|-------|-------|-------|------|--------|
| 1092 CONTIG13 | 6677  | 7851  | 1.84 | 2.64E-02 | transcription_start_site | - | 6219  | 6219  | -1045 | 2442 | AN0785 |
| 1657 CONTIG13 | 8407  | 9356  | 1.52 | 8.36E-02 | transcription_start_site | - | 6337  | 6337  | -2544 | 2441 | AN0785 |
| 1657 CONTIG13 | 8407  | 9356  | 1.52 | 8.36E-02 | transcription_start_site | - | 6219  | 6219  | -2662 | 2442 | AN0785 |
| 808 CONTIG13  | 11107 | 11376 | 2.1  | 1.84E-02 | transcription_start_site | - | 7344  | 7344  | -3897 | 2443 | AN0786 |
| 808 CONTIG13  | 11107 | 11376 | 2.1  | 1.84E-02 | transcription_start_site | - | 6933  | 6933  | -4308 | 2444 | AN0786 |
| 808 CONTIG13  | 11107 | 11376 | 2.1  | 1.84E-02 | transcription_start_site | - | 6641  | 6641  | -4600 | 2445 | AN0786 |
| 969 CONTIG13  | 10437 | 10936 | 1.94 | 3.08E-02 | transcription_start_site | - | 7344  | 7344  | -3342 | 2443 | AN0786 |
| 969 CONTIG13  | 10437 | 10936 | 1.94 | 3.08E-02 | transcription_start_site | - | 6933  | 6933  | -3753 | 2444 | AN0786 |
| 969 CONTIG13  | 10437 | 10936 | 1.94 | 3.08E-02 | transcription_start_site | - | 6641  | 6641  | -4045 | 2445 | AN0786 |
| 1092 CONTIG13 | 6677  | 7851  | 1.84 | 2.64E-02 | transcription_start_site | - | 7344  | 7344  | 80    | 2443 | AN0786 |
| 1092 CONTIG13 | 6677  | 7851  | 1.84 | 2.64E-02 | transcription_start_site | - | 6933  | 6933  | -331  | 2444 | AN0786 |
| 1092 CONTIG13 | 6677  | 7851  | 1.84 | 2.64E-02 | transcription_start_site | - | 6641  | 6641  | -623  | 2445 | AN0786 |
| 1657 CONTIG13 | 8407  | 9356  | 1.52 | 8.36E-02 | transcription_start_site | - | 7344  | 7344  | -1537 | 2443 | AN0786 |
| 1657 CONTIG13 | 8407  | 9356  | 1.52 | 8.36E-02 | transcription_start_site | - | 6933  | 6933  | -1948 | 2444 | AN0786 |
| 1657 CONTIG13 | 8407  | 9356  | 1.52 | 8.36E-02 | transcription_start_site | - | 6641  | 6641  | -2240 | 2445 | AN0786 |
| 808 CONTIG13  | 11107 | 11376 | 2.1  | 1.84E-02 | transcription_start_site | - | 9626  | 9626  | -1615 | 2446 | AN0787 |
| 808 CONTIG13  | 11107 | 11376 | 2.1  | 1.84E-02 | transcription_start_site | - | 8321  | 8321  | -2920 | 2447 | AN0787 |
| 808 CONTIG13  | 11107 | 11376 | 2.1  | 1.84E-02 | transcription_start_site | - | 8093  | 8093  | -3148 | 2448 | AN0787 |
| 969 CONTIG13  | 10437 | 10936 | 1.94 | 3.08E-02 | transcription_start_site | - | 9626  | 9626  | -1060 | 2446 | AN0787 |
| 969 CONTIG13  | 10437 | 10936 | 1.94 | 3.08E-02 | transcription_start_site | - | 8321  | 8321  | -2365 | 2447 | AN0787 |
| 969 CONTIG13  | 10437 | 10936 | 1.94 | 3.08E-02 | transcription_start_site | - | 8093  | 8093  | -2593 | 2448 | AN0787 |
| 1092 CONTIG13 | 6677  | 7851  | 1.84 | 2.64E-02 | transcription_start_site | - | 8093  | 8093  | 829   | 2448 | AN0787 |
| 1092 CONTIG13 | 6677  | 7851  | 1.84 | 2.64E-02 | transcription_start_site | - | 8321  | 8321  | 1057  | 2447 | AN0787 |
| 1657 CONTIG13 | 8407  | 9356  | 1.52 | 8.36E-02 | transcription_start_site | - | 8321  | 8321  | -560  | 2447 | AN0787 |
| 1657 CONTIG13 | 8407  | 9356  | 1.52 | 8.36E-02 | transcription_start_site | - | 9626  | 9626  | 744   | 2446 | AN0787 |
| 1657 CONTIG13 | 8407  | 9356  | 1.52 | 8.36E-02 | transcription_start_site | - | 8093  | 8093  | -788  | 2448 | AN0787 |
| 808 CONTIG13  | 11107 | 11376 | 2.1  | 1.84E-02 | transcription_start_site | + | 10595 | 10595 | 646   | 2449 | AN0788 |
| 969 CONTIG13  | 10437 | 10936 | 1.94 | 3.08E-02 | transcription_start_site | + | 10595 | 10595 | 91    | 2449 | AN0788 |
| 1092 CONTIG13 | 6677  | 7851  | 1.84 | 2.64E-02 | transcription_start_site | + | 10595 | 10595 | -3331 | 2449 | AN0788 |
| 1657 CONTIG13 | 8407  | 9356  | 1.52 | 8.36E-02 | transcription_start_site | + | 10595 | 10595 | -1713 | 2449 | AN0788 |
| 9 CONTIG13    | 57545 | 58182 | 3.73 | 0.00E+00 | transcription_start_site | - | 53115 | 53115 | -4748 | 2500 | AN0805 |
| 1509 CONTIG13 | 55355 | 56619 | 1.58 | 5.02E-02 | transcription_start_site | - | 53115 | 53115 | -2872 | 2500 | AN0805 |
| 9 CONTIG13    | 57545 | 58182 | 3.73 | 0.00E+00 | transcription_start_site | - | 55324 | 55324 | -2539 | 2501 | AN0806 |
| 9 CONTIG13    | 57545 | 58182 | 3.73 | 0.00E+00 | transcription_start_site | - | 54888 | 54888 | -2975 | 2502 | AN0806 |
| 9 CONTIG13    | 57545 | 58182 | 3.73 | 0.00E+00 | transcription_start_site | - | 54678 | 54678 | -3185 | 2503 | AN0806 |
| 9 CONTIG13    | 57545 | 58182 | 3.73 | 0.00E+00 | transcription_start_site | - | 54550 | 54550 | -3313 | 2504 | AN0806 |
| 9 CONTIG13    | 57545 | 58182 | 3.73 | 0.00E+00 | transcription_start_site | - | 54141 | 54141 | -3722 | 2505 | AN0806 |
| 9 CONTIG13    | 57545 | 58182 | 3.73 | 0.00E+00 | transcription_start_site | - | 53964 | 53964 | -3899 | 2506 | AN0806 |
| 1509 CONTIG13 | 55355 | 56619 | 1.58 | 5.02E-02 | transcription_start_site | - | 55324 | 55324 | -663  | 2501 | AN0806 |
| 1509 CONTIG13 | 55355 | 56619 | 1.58 | 5.02E-02 | transcription_start_site | - | 54888 | 54888 | -1099 | 2502 | AN0806 |
| 1509 CONTIG13 | 55355 | 56619 | 1.58 | 5.02E-02 | transcription_start_site | - | 54678 | 54678 | -1309 | 2503 | AN0806 |
| 1509 CONTIG13 | 55355 | 56619 | 1.58 | 5.02E-02 | transcription_start_site | - | 54550 | 54550 | -1437 | 2504 | AN0806 |
| 1509 CONTIG13 | 55355 | 56619 | 1.58 | 5.02E-02 | transcription_start_site | - | 54141 | 54141 | -1846 | 2505 | AN0806 |
| 1509 CONTIG13 | 55355 | 56619 | 1.58 | 5.02E-02 | transcription_start_site | - | 53964 | 53964 | -2023 | 2506 | AN0806 |
| 9 CONTIG13    | 57545 | 58182 | 3.73 | 0.00E+00 | transcription_start_site | + | 59230 | 59230 | -1366 | 2507 | AN0807 |
| 9 CONTIG13    | 57545 | 58182 | 3.73 | 0.00E+00 | transcription_start_site | + | 59557 | 59557 | -1693 | 2508 | AN0807 |
| 1509 CONTIG13 | 55355 | 56619 | 1.58 | 5.02E-02 | transcription_start_site | + | 59230 | 59230 | -3243 | 2507 | AN0807 |
| 1509 CONTIG13 | 55355 | 56619 | 1.58 | 5.02E-02 | transcription_start_site | + | 59557 | 59557 | -3570 | 2508 | AN0807 |
| 1659 CONTIG13 | 63302 | 63591 | 1.52 | 1.08E-01 | transcription_start_site | - | 63000 | 63000 | -446  | 2509 | AN0808 |
| 1659 CONTIG13 | 63302 | 63591 | 1.52 | 1.08E-01 | transcription_start_site | - | 62875 | 62875 | -571  | 2510 | AN0808 |
| 1659 CONTIG13 | 63302 | 63591 | 1.52 | 1.08E-01 | transcription_start_site | - | 62756 | 62756 | -690  | 2511 | AN0808 |
| 1659 CONTIG13 | 63302 | 63591 | 1.52 | 1.08E-01 | transcription_start_site | - | 62611 | 62611 | -835  | 2512 | AN0808 |
| 1659 CONTIG13 | 63302 | 63591 | 1.52 | 1.08E-01 | transcription_start_site | - | 62402 | 62402 | -1044 | 2513 | AN0808 |
| 1411 CONTIG13 | 68552 | 68836 | 1.63 | 8.01E-02 | transcription_start_site | + | 69206 | 69206 | -512  | 2518 | AN0809 |
| 1659 CONTIG13 | 63302 | 63591 | 1.52 | 1.08E-01 | transcription_start_site | + | 63737 | 63737 | -290  | 2514 | AN0809 |
| 1659 CONTIG13 | 63302 | 63591 | 1.52 | 1.08E-01 | transcription_start_site | + | 63939 | 63939 | -492  | 2515 | AN0809 |
| 1659 CONTIG13 | 63302 | 63591 | 1.52 | 1.08E-01 | transcription_start_site | + | 64150 | 64150 | -703  | 2516 | AN0809 |

|      |          |        |        |      |          |                          |   |        |        |       |      |        |
|------|----------|--------|--------|------|----------|--------------------------|---|--------|--------|-------|------|--------|
| 1659 | CONTIG13 | 63302  | 63591  | 1.52 | 1.08E-01 | transcription_start_site | + | 64281  | 64281  | -834  | 2517 | AN0809 |
| 1411 | CONTIG13 | 68552  | 68836  | 1.63 | 8.01E-02 | transcription_start_site | + | 70057  | 70057  | -1363 | 2519 | AN0810 |
| 1411 | CONTIG13 | 68552  | 68836  | 1.63 | 8.01E-02 | transcription_start_site | + | 70174  | 70174  | -1480 | 2520 | AN0810 |
| 1411 | CONTIG13 | 68552  | 68836  | 1.63 | 8.01E-02 | transcription_start_site | + | 70353  | 70353  | -1659 | 2521 | AN0810 |
| 1411 | CONTIG13 | 68552  | 68836  | 1.63 | 8.01E-02 | transcription_start_site | + | 72345  | 72345  | -3651 | 2522 | AN0810 |
| 1411 | CONTIG13 | 68552  | 68836  | 1.63 | 8.01E-02 | transcription_start_site | + | 72951  | 72951  | -4257 | 2523 | AN0810 |
| 1411 | CONTIG13 | 68552  | 68836  | 1.63 | 8.01E-02 | transcription_start_site | + | 73065  | 73065  | -4371 | 2524 | AN0810 |
| 1660 | CONTIG13 | 79067  | 79495  | 1.52 | 1.08E-01 | transcription_start_site | + | 84028  | 84028  | -4747 | 2533 | AN0814 |
| 1028 | CONTIG13 | 93690  | 94044  | 1.89 | 3.70E-02 | transcription_start_site | - | 92803  | 92803  | -1064 | 2541 | AN0817 |
| 1028 | CONTIG13 | 93690  | 94044  | 1.89 | 3.70E-02 | transcription_start_site | - | 92403  | 92403  | -1464 | 2542 | AN0817 |
| 1028 | CONTIG13 | 93690  | 94044  | 1.89 | 3.70E-02 | transcription_start_site | - | 91304  | 91304  | -2563 | 2543 | AN0817 |
| 1028 | CONTIG13 | 93690  | 94044  | 1.89 | 3.70E-02 | transcription_start_site | + | 95241  | 95241  | -1374 | 2544 | AN0818 |
| 1028 | CONTIG13 | 93690  | 94044  | 1.89 | 3.70E-02 | transcription_start_site | + | 95477  | 95477  | -1610 | 2545 | AN0818 |
| 1028 | CONTIG13 | 93690  | 94044  | 1.89 | 3.70E-02 | transcription_start_site | + | 97419  | 97419  | -3552 | 2546 | AN0818 |
| 1028 | CONTIG13 | 93690  | 94044  | 1.89 | 3.70E-02 | transcription_start_site | + | 97959  | 97959  | -4092 | 2547 | AN0819 |
| 1028 | CONTIG13 | 93690  | 94044  | 1.89 | 3.70E-02 | transcription_start_site | + | 98098  | 98098  | -4231 | 2548 | AN0819 |
| 1028 | CONTIG13 | 93690  | 94044  | 1.89 | 3.70E-02 | transcription_start_site | + | 98283  | 98283  | -4416 | 2549 | AN0819 |
| 1028 | CONTIG13 | 93690  | 94044  | 1.89 | 3.70E-02 | transcription_start_site | + | 98448  | 98448  | -4581 | 2550 | AN0819 |
| 967  | CONTIG13 | 114528 | 115626 | 1.94 | 1.81E-02 | transcription_start_site | - | 113712 | 113712 | -1365 | 2553 | AN0822 |
| 967  | CONTIG13 | 114528 | 115626 | 1.94 | 1.81E-02 | transcription_start_site | - | 113623 | 113623 | -1454 | 2554 | AN0822 |
| 967  | CONTIG13 | 114528 | 115626 | 1.94 | 1.81E-02 | transcription_start_site | - | 112222 | 112222 | -2855 | 2555 | AN0822 |
| 967  | CONTIG13 | 114528 | 115626 | 1.94 | 1.81E-02 | transcription_start_site | + | 119563 | 119563 | -4486 | 2558 | AN0824 |
| 967  | CONTIG13 | 114528 | 115626 | 1.94 | 1.81E-02 | transcription_start_site | + | 119763 | 119763 | -4686 | 2559 | AN0824 |
| 485  | CONTIG13 | 126602 | 126956 | 2.47 | 5.20E-03 | transcription_start_site | - | 123015 | 123015 | -3764 | 2561 | AN0825 |
| 485  | CONTIG13 | 126602 | 126956 | 2.47 | 5.20E-03 | transcription_start_site | - | 122634 | 122634 | -4145 | 2562 | AN0825 |
| 485  | CONTIG13 | 126602 | 126956 | 2.47 | 5.20E-03 | transcription_start_site | - | 122021 | 122021 | -4758 | 2563 | AN0825 |
| 485  | CONTIG13 | 126602 | 126956 | 2.47 | 5.20E-03 | transcription_start_site | - | 121833 | 121833 | -4946 | 2564 | AN0825 |
| 1412 | CONTIG13 | 124367 | 124626 | 1.63 | 8.01E-02 | transcription_start_site | - | 123015 | 123015 | -1481 | 2561 | AN0825 |
| 1412 | CONTIG13 | 124367 | 124626 | 1.63 | 8.01E-02 | transcription_start_site | - | 122634 | 122634 | -1862 | 2562 | AN0825 |
| 1412 | CONTIG13 | 124367 | 124626 | 1.63 | 8.01E-02 | transcription_start_site | - | 122021 | 122021 | -2475 | 2563 | AN0825 |
| 1412 | CONTIG13 | 124367 | 124626 | 1.63 | 8.01E-02 | transcription_start_site | - | 121833 | 121833 | -2663 | 2564 | AN0825 |
| 485  | CONTIG13 | 126602 | 126956 | 2.47 | 5.20E-03 | transcription_start_site | - | 126449 | 126449 | -330  | 2565 | AN0826 |
| 485  | CONTIG13 | 126602 | 126956 | 2.47 | 5.20E-03 | transcription_start_site | + | 128594 | 128594 | -1815 | 2566 | AN0827 |
| 485  | CONTIG13 | 126602 | 126956 | 2.47 | 5.20E-03 | transcription_start_site | + | 128762 | 128762 | -1983 | 2567 | AN0827 |
| 485  | CONTIG13 | 126602 | 126956 | 2.47 | 5.20E-03 | transcription_start_site | + | 129768 | 129768 | -2989 | 2568 | AN0827 |
| 1412 | CONTIG13 | 124367 | 124626 | 1.63 | 8.01E-02 | transcription_start_site | + | 128594 | 128594 | -4097 | 2566 | AN0827 |
| 1412 | CONTIG13 | 124367 | 124626 | 1.63 | 8.01E-02 | transcription_start_site | + | 128762 | 128762 | -4265 | 2567 | AN0827 |
| 485  | CONTIG13 | 126602 | 126956 | 2.47 | 5.20E-03 | transcription_start_site | + | 130677 | 130677 | -3898 | 2569 | AN0828 |
| 485  | CONTIG13 | 126602 | 126956 | 2.47 | 5.20E-03 | transcription_start_site | + | 130888 | 130888 | -4109 | 2570 | AN0828 |
| 485  | CONTIG13 | 126602 | 126956 | 2.47 | 5.20E-03 | transcription_start_site | + | 131529 | 131529 | -4750 | 2571 | AN0828 |
| 1165 | CONTIG13 | 139363 | 139632 | 1.79 | 5.22E-02 | transcription_start_site | - | 134919 | 134919 | -4578 | 2572 | AN0829 |
| 1165 | CONTIG13 | 139363 | 139632 | 1.79 | 5.22E-02 | transcription_start_site | - | 134458 | 134458 | -5039 | 2573 | AN0829 |
| 1165 | CONTIG13 | 139363 | 139632 | 1.79 | 5.22E-02 | transcription_start_site | - | 136908 | 136908 | -2589 | 2576 | AN0830 |
| 1165 | CONTIG13 | 139363 | 139632 | 1.79 | 5.22E-02 | transcription_start_site | - | 136211 | 136211 | -3286 | 2577 | AN0830 |
| 1165 | CONTIG13 | 139363 | 139632 | 1.79 | 5.22E-02 | transcription_start_site | - | 139189 | 139189 | -308  | 2578 | AN0831 |
| 1165 | CONTIG13 | 139363 | 139632 | 1.79 | 5.22E-02 | transcription_start_site | - | 138676 | 138676 | -821  | 2579 | AN0831 |
| 1165 | CONTIG13 | 139363 | 139632 | 1.79 | 5.22E-02 | transcription_start_site | - | 138319 | 138319 | -1178 | 2580 | AN0831 |
| 1321 | CONTIG13 | 142068 | 142333 | 1.68 | 6.84E-02 | transcription_start_site | - | 139189 | 139189 | -3011 | 2578 | AN0831 |
| 1321 | CONTIG13 | 142068 | 142333 | 1.68 | 6.84E-02 | transcription_start_site | - | 138676 | 138676 | -3524 | 2579 | AN0831 |
| 1321 | CONTIG13 | 142068 | 142333 | 1.68 | 6.84E-02 | transcription_start_site | - | 138319 | 138319 | -3881 | 2580 | AN0831 |
| 1165 | CONTIG13 | 139363 | 139632 | 1.79 | 5.22E-02 | transcription_start_site | + | 139812 | 139812 | -314  | 2581 | AN0832 |
| 1165 | CONTIG13 | 139363 | 139632 | 1.79 | 5.22E-02 | transcription_start_site | + | 140006 | 140006 | -508  | 2582 | AN0832 |
| 1165 | CONTIG13 | 139363 | 139632 | 1.79 | 5.22E-02 | transcription_start_site | + | 140458 | 140458 | -960  | 2583 | AN0832 |
| 1165 | CONTIG13 | 139363 | 139632 | 1.79 | 5.22E-02 | transcription_start_site | + | 142968 | 142968 | -3470 | 2584 | AN0833 |
| 1165 | CONTIG13 | 139363 | 139632 | 1.79 | 5.22E-02 | transcription_start_site | + | 143352 | 143352 | -3854 | 2585 | AN0833 |
| 1321 | CONTIG13 | 142068 | 142333 | 1.68 | 6.84E-02 | transcription_start_site | + | 142968 | 142968 | -767  | 2584 | AN0833 |
| 1321 | CONTIG13 | 142068 | 142333 | 1.68 | 6.84E-02 | transcription_start_site | + | 143352 | 143352 | -1151 | 2585 | AN0833 |

|      |          |        |        |      |          |                          |   |        |        |       |      |        |
|------|----------|--------|--------|------|----------|--------------------------|---|--------|--------|-------|------|--------|
| 1165 | CONTIG13 | 139363 | 139632 | 1.79 | 5.22E-02 | transcription_start_site | + | 144482 | 144482 | -4984 | 2586 | AN0834 |
| 1165 | CONTIG13 | 139363 | 139632 | 1.79 | 5.22E-02 | transcription_start_site | + | 144576 | 144576 | -5078 | 2587 | AN0834 |
| 1321 | CONTIG13 | 142068 | 142333 | 1.68 | 6.84E-02 | transcription_start_site | + | 144482 | 144482 | -2281 | 2586 | AN0834 |
| 1321 | CONTIG13 | 142068 | 142333 | 1.68 | 6.84E-02 | transcription_start_site | + | 144576 | 144576 | -2375 | 2587 | AN0834 |
| 1321 | CONTIG13 | 142068 | 142333 | 1.68 | 6.84E-02 | transcription_start_site | + | 144725 | 144725 | -2524 | 2588 | AN0834 |
| 1321 | CONTIG13 | 142068 | 142333 | 1.68 | 6.84E-02 | transcription_start_site | + | 145016 | 145016 | -2815 | 2589 | AN0834 |
| 1321 | CONTIG13 | 142068 | 142333 | 1.68 | 6.84E-02 | transcription_start_site | + | 145724 | 145724 | -3523 | 2590 | AN0834 |
| 1321 | CONTIG13 | 142068 | 142333 | 1.68 | 6.84E-02 | transcription_start_site | + | 146715 | 146715 | -4514 | 2591 | AN0834 |
| 2174 | CONTIG13 | 184358 | 184792 | 1.31 | 1.93E-01 | transcription_start_site | - | 182989 | 182989 | -1586 | 2609 | AN0842 |
| 2174 | CONTIG13 | 184358 | 184792 | 1.31 | 1.93E-01 | transcription_start_site | - | 182859 | 182859 | -1716 | 2610 | AN0842 |
| 2174 | CONTIG13 | 184358 | 184792 | 1.31 | 1.93E-01 | transcription_start_site | - | 182690 | 182690 | -1885 | 2611 | AN0842 |
| 2174 | CONTIG13 | 184358 | 184792 | 1.31 | 1.93E-01 | transcription_start_site | + | 184632 | 184632 | -57   | 2617 | AN0843 |
| 2174 | CONTIG13 | 184358 | 184792 | 1.31 | 1.93E-01 | transcription_start_site | + | 184377 | 184377 | 198   | 2616 | AN0843 |
| 2174 | CONTIG13 | 184358 | 184792 | 1.31 | 1.93E-01 | transcription_start_site | + | 184043 | 184043 | 532   | 2615 | AN0843 |
| 2174 | CONTIG13 | 184358 | 184792 | 1.31 | 1.93E-01 | transcription_start_site | + | 185482 | 185482 | -907  | 2618 | AN0844 |
| 2174 | CONTIG13 | 184358 | 184792 | 1.31 | 1.93E-01 | transcription_start_site | + | 185618 | 185618 | -1043 | 2619 | AN0844 |
| 2174 | CONTIG13 | 184358 | 184792 | 1.31 | 1.93E-01 | transcription_start_site | + | 185720 | 185720 | -1145 | 2620 | AN0844 |
| 2174 | CONTIG13 | 184358 | 184792 | 1.31 | 1.93E-01 | transcription_start_site | + | 186076 | 186076 | -1501 | 2621 | AN0844 |
| 2024 | CONTIG13 | 189458 | 190027 | 1.37 | 1.50E-01 | transcription_start_site | - | 189591 | 189591 | -151  | 2622 | AN0845 |
| 2024 | CONTIG13 | 189458 | 190027 | 1.37 | 1.50E-01 | transcription_start_site | - | 189045 | 189045 | -697  | 2623 | AN0845 |
| 2024 | CONTIG13 | 189458 | 190027 | 1.37 | 1.50E-01 | transcription_start_site | + | 189967 | 189967 | -224  | 2624 | AN0846 |
| 133  | CONTIG13 | 221180 | 221604 | 3.1  | 6.10E-04 | transcription_start_site | - | 216962 | 216962 | -4430 | 2649 | AN0855 |
| 133  | CONTIG13 | 221180 | 221604 | 3.1  | 6.10E-04 | transcription_start_site | - | 216580 | 216580 | -4812 | 2650 | AN0855 |
| 204  | CONTIG13 | 219155 | 219517 | 2.94 | 9.51E-04 | transcription_start_site | - | 216962 | 216962 | -2374 | 2649 | AN0855 |
| 204  | CONTIG13 | 219155 | 219517 | 2.94 | 9.51E-04 | transcription_start_site | - | 216580 | 216580 | -2756 | 2650 | AN0855 |
| 1322 | CONTIG13 | 220145 | 220715 | 1.68 | 6.84E-02 | transcription_start_site | - | 216962 | 216962 | -3468 | 2649 | AN0855 |
| 1322 | CONTIG13 | 220145 | 220715 | 1.68 | 6.84E-02 | transcription_start_site | - | 216580 | 216580 | -3850 | 2650 | AN0855 |
| 2025 | CONTIG13 | 217805 | 218459 | 1.37 | 1.50E-01 | transcription_start_site | - | 216962 | 216962 | -1170 | 2649 | AN0855 |
| 2025 | CONTIG13 | 217805 | 218459 | 1.37 | 1.50E-01 | transcription_start_site | - | 216580 | 216580 | -1552 | 2650 | AN0855 |
| 133  | CONTIG13 | 221180 | 221604 | 3.1  | 6.10E-04 | transcription_start_site | - | 218925 | 218925 | -2467 | 2651 | AN0856 |
| 133  | CONTIG13 | 221180 | 221604 | 3.1  | 6.10E-04 | transcription_start_site | - | 218558 | 218558 | -2834 | 2652 | AN0856 |
| 204  | CONTIG13 | 219155 | 219517 | 2.94 | 9.51E-04 | transcription_start_site | - | 218925 | 218925 | -411  | 2651 | AN0856 |
| 204  | CONTIG13 | 219155 | 219517 | 2.94 | 9.51E-04 | transcription_start_site | - | 218558 | 218558 | -778  | 2652 | AN0856 |
| 1026 | CONTIG13 | 223595 | 224680 | 1.89 | 1.86E-02 | transcription_start_site | - | 218925 | 218925 | -5212 | 2651 | AN0856 |
| 1322 | CONTIG13 | 220145 | 220715 | 1.68 | 6.84E-02 | transcription_start_site | - | 218925 | 218925 | -1505 | 2651 | AN0856 |
| 1322 | CONTIG13 | 220145 | 220715 | 1.68 | 6.84E-02 | transcription_start_site | - | 218558 | 218558 | -1872 | 2652 | AN0856 |
| 2025 | CONTIG13 | 217805 | 218459 | 1.37 | 1.50E-01 | transcription_start_site | - | 218558 | 218558 | 426   | 2652 | AN0856 |
| 2025 | CONTIG13 | 217805 | 218459 | 1.37 | 1.50E-01 | transcription_start_site | - | 218925 | 218925 | 793   | 2651 | AN0856 |
| 133  | CONTIG13 | 221180 | 221604 | 3.1  | 6.10E-04 | transcription_start_site | + | 222603 | 222603 | -1211 | 2653 | AN0857 |
| 133  | CONTIG13 | 221180 | 221604 | 3.1  | 6.10E-04 | transcription_start_site | + | 222703 | 222703 | -1311 | 2654 | AN0857 |
| 133  | CONTIG13 | 221180 | 221604 | 3.1  | 6.10E-04 | transcription_start_site | + | 222872 | 222872 | -1480 | 2655 | AN0857 |
| 133  | CONTIG13 | 221180 | 221604 | 3.1  | 6.10E-04 | transcription_start_site | + | 223213 | 223213 | -1821 | 2656 | AN0857 |
| 133  | CONTIG13 | 221180 | 221604 | 3.1  | 6.10E-04 | transcription_start_site | + | 223397 | 223397 | -2005 | 2657 | AN0857 |
| 204  | CONTIG13 | 219155 | 219517 | 2.94 | 9.51E-04 | transcription_start_site | + | 222603 | 222603 | -3267 | 2653 | AN0857 |
| 204  | CONTIG13 | 219155 | 219517 | 2.94 | 9.51E-04 | transcription_start_site | + | 222703 | 222703 | -3367 | 2654 | AN0857 |
| 204  | CONTIG13 | 219155 | 219517 | 2.94 | 9.51E-04 | transcription_start_site | + | 222872 | 222872 | -3536 | 2655 | AN0857 |
| 204  | CONTIG13 | 219155 | 219517 | 2.94 | 9.51E-04 | transcription_start_site | + | 223213 | 223213 | -3877 | 2656 | AN0857 |
| 204  | CONTIG13 | 219155 | 219517 | 2.94 | 9.51E-04 | transcription_start_site | + | 223397 | 223397 | -4061 | 2657 | AN0857 |
| 1026 | CONTIG13 | 223595 | 224680 | 1.89 | 1.86E-02 | transcription_start_site | + | 223397 | 223397 | 740   | 2657 | AN0857 |
| 1026 | CONTIG13 | 223595 | 224680 | 1.89 | 1.86E-02 | transcription_start_site | + | 223213 | 223213 | 924   | 2656 | AN0857 |
| 1026 | CONTIG13 | 223595 | 224680 | 1.89 | 1.86E-02 | transcription_start_site | + | 222872 | 222872 | 1265  | 2655 | AN0857 |
| 1026 | CONTIG13 | 223595 | 224680 | 1.89 | 1.86E-02 | transcription_start_site | + | 222703 | 222703 | 1434  | 2654 | AN0857 |
| 1026 | CONTIG13 | 223595 | 224680 | 1.89 | 1.86E-02 | transcription_start_site | + | 222603 | 222603 | 1534  | 2653 | AN0857 |
| 1322 | CONTIG13 | 220145 | 220715 | 1.68 | 6.84E-02 | transcription_start_site | + | 222603 | 222603 | -2173 | 2653 | AN0857 |
| 1322 | CONTIG13 | 220145 | 220715 | 1.68 | 6.84E-02 | transcription_start_site | + | 222703 | 222703 | -2273 | 2654 | AN0857 |
| 1322 | CONTIG13 | 220145 | 220715 | 1.68 | 6.84E-02 | transcription_start_site | + | 222872 | 222872 | -2442 | 2655 | AN0857 |
| 1322 | CONTIG13 | 220145 | 220715 | 1.68 | 6.84E-02 | transcription_start_site | + | 223213 | 223213 | -2783 | 2656 | AN0857 |

|      |          |        |        |      |          |                          |   |        |        |       |      |        |
|------|----------|--------|--------|------|----------|--------------------------|---|--------|--------|-------|------|--------|
| 1322 | CONTIG13 | 220145 | 220715 | 1.68 | 6.84E-02 | transcription_start_site | + | 223397 | 223397 | -2967 | 2657 | AN0857 |
| 2025 | CONTIG13 | 217805 | 218459 | 1.37 | 1.50E-01 | transcription_start_site | + | 222603 | 222603 | -4471 | 2653 | AN0857 |
| 2025 | CONTIG13 | 217805 | 218459 | 1.37 | 1.50E-01 | transcription_start_site | + | 222703 | 222703 | -4571 | 2654 | AN0857 |
| 2025 | CONTIG13 | 217805 | 218459 | 1.37 | 1.50E-01 | transcription_start_site | + | 222872 | 222872 | -4740 | 2655 | AN0857 |
| 2025 | CONTIG13 | 217805 | 218459 | 1.37 | 1.50E-01 | transcription_start_site | + | 223213 | 223213 | -5081 | 2656 | AN0857 |
| 2025 | CONTIG13 | 217805 | 218459 | 1.37 | 1.50E-01 | transcription_start_site | + | 223397 | 223397 | -5265 | 2657 | AN0857 |
| 74   | CONTIG13 | 231685 | 232259 | 3.31 | 0.00E+00 | transcription_start_site | - | 229869 | 229869 | -2103 | 2658 | AN0858 |
| 74   | CONTIG13 | 231685 | 232259 | 3.31 | 0.00E+00 | transcription_start_site | - | 232511 | 232511 | 539   | 2659 | AN0859 |
| 74   | CONTIG13 | 231685 | 232259 | 3.31 | 0.00E+00 | transcription_start_site | - | 231281 | 231281 | -691  | 2660 | AN0859 |
| 74   | CONTIG13 | 231685 | 232259 | 3.31 | 0.00E+00 | transcription_start_site | + | 233277 | 233277 | -1305 | 2661 | AN0860 |
| 74   | CONTIG13 | 231685 | 232259 | 3.31 | 0.00E+00 | transcription_start_site | + | 233427 | 233427 | -1455 | 2662 | AN0860 |
| 74   | CONTIG13 | 231685 | 232259 | 3.31 | 0.00E+00 | transcription_start_site | + | 233673 | 233673 | -1701 | 2663 | AN0860 |
| 74   | CONTIG13 | 231685 | 232259 | 3.31 | 0.00E+00 | transcription_start_site | + | 234657 | 234657 | -2685 | 2664 | AN0860 |
| 323  | CONTIG13 | 243392 | 243662 | 2.73 | 1.80E-03 | transcription_start_site | - | 240869 | 240869 | -2658 | 2672 | AN0863 |
| 323  | CONTIG13 | 243392 | 243662 | 2.73 | 1.80E-03 | transcription_start_site | - | 240382 | 240382 | -3145 | 2673 | AN0863 |
| 323  | CONTIG13 | 243392 | 243662 | 2.73 | 1.80E-03 | transcription_start_site | - | 240082 | 240082 | -3445 | 2674 | AN0863 |
| 323  | CONTIG13 | 243392 | 243662 | 2.73 | 1.80E-03 | transcription_start_site | - | 239405 | 239405 | -4122 | 2675 | AN0863 |
| 567  | CONTIG13 | 244808 | 245387 | 2.36 | 7.85E-03 | transcription_start_site | - | 240869 | 240869 | -4228 | 2672 | AN0863 |
| 567  | CONTIG13 | 244808 | 245387 | 2.36 | 7.85E-03 | transcription_start_site | - | 240382 | 240382 | -4715 | 2673 | AN0863 |
| 567  | CONTIG13 | 244808 | 245387 | 2.36 | 7.85E-03 | transcription_start_site | - | 240082 | 240082 | -5015 | 2674 | AN0863 |
| 567  | CONTIG13 | 244808 | 245387 | 2.36 | 7.85E-03 | transcription_start_site | - | 245340 | 245340 | 242   | 2681 | AN0864 |
| 567  | CONTIG13 | 244808 | 245387 | 2.36 | 7.85E-03 | transcription_start_site | - | 245589 | 245589 | 491   | 2680 | AN0864 |
| 567  | CONTIG13 | 244808 | 245387 | 2.36 | 7.85E-03 | transcription_start_site | - | 245683 | 245683 | 585   | 2679 | AN0864 |
| 567  | CONTIG13 | 244808 | 245387 | 2.36 | 7.85E-03 | transcription_start_site | - | 246049 | 246049 | 951   | 2678 | AN0864 |
| 323  | CONTIG13 | 243392 | 243662 | 2.73 | 1.80E-03 | transcription_start_site | + | 247571 | 247571 | -4044 | 2682 | AN0865 |
| 323  | CONTIG13 | 243392 | 243662 | 2.73 | 1.80E-03 | transcription_start_site | + | 247831 | 247831 | -4304 | 2683 | AN0865 |
| 567  | CONTIG13 | 244808 | 245387 | 2.36 | 7.85E-03 | transcription_start_site | + | 247571 | 247571 | -2473 | 2682 | AN0865 |
| 567  | CONTIG13 | 244808 | 245387 | 2.36 | 7.85E-03 | transcription_start_site | + | 247831 | 247831 | -2733 | 2683 | AN0865 |
| 424  | CONTIG14 | 1576   | 1850   | 2.56 | 8.69E-04 | transcription_start_site | + | 2708   | 2708   | -995  | 2684 | AN0866 |
| 424  | CONTIG14 | 1576   | 1850   | 2.56 | 8.69E-04 | transcription_start_site | + | 3222   | 3222   | -1509 | 2685 | AN0866 |
| 424  | CONTIG14 | 1576   | 1850   | 2.56 | 8.69E-04 | transcription_start_site | + | 4205   | 4205   | -2492 | 2686 | AN0866 |
| 424  | CONTIG14 | 1576   | 1850   | 2.56 | 8.69E-04 | transcription_start_site | + | 4708   | 4708   | -2995 | 2687 | AN0866 |
| 695  | CONTIG14 | 2326   | 2760   | 2.2  | 3.61E-03 | transcription_start_site | + | 2708   | 2708   | -165  | 2684 | AN0866 |
| 695  | CONTIG14 | 2326   | 2760   | 2.2  | 3.61E-03 | transcription_start_site | + | 3222   | 3222   | -679  | 2685 | AN0866 |
| 695  | CONTIG14 | 2326   | 2760   | 2.2  | 3.61E-03 | transcription_start_site | + | 4205   | 4205   | -1662 | 2686 | AN0866 |
| 695  | CONTIG14 | 2326   | 2760   | 2.2  | 3.61E-03 | transcription_start_site | + | 4708   | 4708   | -2165 | 2687 | AN0866 |
| 423  | CONTIG14 | 17636  | 18275  | 2.56 | 0.00E+00 | transcription_start_site | - | 13956  | 13956  | -3999 | 2694 | AN0869 |
| 423  | CONTIG14 | 17636  | 18275  | 2.56 | 0.00E+00 | transcription_start_site | - | 13774  | 13774  | -4181 | 2695 | AN0869 |
| 423  | CONTIG14 | 17636  | 18275  | 2.56 | 0.00E+00 | transcription_start_site | - | 13526  | 13526  | -4429 | 2696 | AN0869 |
| 423  | CONTIG14 | 17636  | 18275  | 2.56 | 0.00E+00 | transcription_start_site | - | 17411  | 17411  | -544  | 2697 | AN0870 |
| 423  | CONTIG14 | 17636  | 18275  | 2.56 | 0.00E+00 | transcription_start_site | - | 17163  | 17163  | -792  | 2698 | AN0870 |
| 423  | CONTIG14 | 17636  | 18275  | 2.56 | 0.00E+00 | transcription_start_site | - | 16686  | 16686  | -1269 | 2699 | AN0870 |
| 423  | CONTIG14 | 17636  | 18275  | 2.56 | 0.00E+00 | transcription_start_site | - | 16339  | 16339  | -1616 | 2700 | AN0870 |
| 2333 | CONTIG14 | 21901  | 22405  | 1.26 | 1.25E-01 | transcription_start_site | - | 17411  | 17411  | -4742 | 2697 | AN0870 |
| 2333 | CONTIG14 | 21901  | 22405  | 1.26 | 1.25E-01 | transcription_start_site | - | 17163  | 17163  | -4990 | 2698 | AN0870 |
| 423  | CONTIG14 | 17636  | 18275  | 2.56 | 0.00E+00 | transcription_start_site | + | 20114  | 20114  | -2158 | 2701 | AN0871 |
| 423  | CONTIG14 | 17636  | 18275  | 2.56 | 0.00E+00 | transcription_start_site | + | 21910  | 21910  | -3954 | 2702 | AN0872 |
| 423  | CONTIG14 | 17636  | 18275  | 2.56 | 0.00E+00 | transcription_start_site | + | 22711  | 22711  | -4755 | 2703 | AN0872 |
| 2333 | CONTIG14 | 21901  | 22405  | 1.26 | 1.25E-01 | transcription_start_site | + | 21910  | 21910  | 243   | 2702 | AN0872 |
| 2333 | CONTIG14 | 21901  | 22405  | 1.26 | 1.25E-01 | transcription_start_site | + | 22711  | 22711  | -558  | 2703 | AN0872 |
| 2333 | CONTIG14 | 21901  | 22405  | 1.26 | 1.25E-01 | transcription_start_site | + | 25032  | 25032  | -2879 | 2704 | AN0873 |
| 2333 | CONTIG14 | 21901  | 22405  | 1.26 | 1.25E-01 | transcription_start_site | + | 25913  | 25913  | -3760 | 2705 | AN0873 |
| 2333 | CONTIG14 | 21901  | 22405  | 1.26 | 1.25E-01 | transcription_start_site | + | 26428  | 26428  | -4275 | 2706 | AN0873 |
| 2053 | CONTIG14 | 32402  | 32986  | 1.35 | 7.25E-02 | transcription_start_site | - | 29752  | 29752  | -2942 | 2707 | AN0874 |
| 2053 | CONTIG14 | 32402  | 32986  | 1.35 | 7.25E-02 | transcription_start_site | - | 29537  | 29537  | -3157 | 2708 | AN0874 |
| 2053 | CONTIG14 | 32402  | 32986  | 1.35 | 7.25E-02 | transcription_start_site | - | 29325  | 29325  | -3369 | 2709 | AN0874 |
| 2053 | CONTIG14 | 32402  | 32986  | 1.35 | 7.25E-02 | transcription_start_site | - | 28898  | 28898  | -3796 | 2710 | AN0874 |



|               |       |       |      |          |                          |   |       |       |       |      |        |
|---------------|-------|-------|------|----------|--------------------------|---|-------|-------|-------|------|--------|
| 2053 CONTIG14 | 32402 | 32986 | 1.35 | 7.25E-02 | transcription_start_site | - | 28636 | 28636 | -4058 | 2711 | AN0874 |
| 2053 CONTIG14 | 32402 | 32986 | 1.35 | 7.25E-02 | transcription_start_site | - | 27981 | 27981 | -4713 | 2712 | AN0874 |
| 2053 CONTIG14 | 32402 | 32986 | 1.35 | 7.25E-02 | transcription_start_site | - | 27813 | 27813 | -4881 | 2713 | AN0874 |
| 2053 CONTIG14 | 32402 | 32986 | 1.35 | 7.25E-02 | transcription_start_site | - | 27558 | 27558 | -5136 | 2714 | AN0874 |
| 1457 CONTIG14 | 34818 | 35302 | 1.61 | 3.70E-02 | transcription_start_site | - | 31604 | 31604 | -3456 | 2715 | AN0875 |
| 1457 CONTIG14 | 34818 | 35302 | 1.61 | 3.70E-02 | transcription_start_site | - | 31395 | 31395 | -3665 | 2716 | AN0875 |
| 1457 CONTIG14 | 34818 | 35302 | 1.61 | 3.70E-02 | transcription_start_site | - | 30819 | 30819 | -4241 | 2717 | AN0875 |
| 1457 CONTIG14 | 34818 | 35302 | 1.61 | 3.70E-02 | transcription_start_site | - | 30674 | 30674 | -4386 | 2718 | AN0875 |
| 1457 CONTIG14 | 34818 | 35302 | 1.61 | 3.70E-02 | transcription_start_site | - | 30439 | 30439 | -4621 | 2719 | AN0875 |
| 1457 CONTIG14 | 34818 | 35302 | 1.61 | 3.70E-02 | transcription_start_site | - | 30349 | 30349 | -4711 | 2720 | AN0875 |
| 2053 CONTIG14 | 32402 | 32986 | 1.35 | 7.25E-02 | transcription_start_site | - | 31604 | 31604 | -1090 | 2715 | AN0875 |
| 2053 CONTIG14 | 32402 | 32986 | 1.35 | 7.25E-02 | transcription_start_site | - | 31395 | 31395 | -1299 | 2716 | AN0875 |
| 2053 CONTIG14 | 32402 | 32986 | 1.35 | 7.25E-02 | transcription_start_site | - | 30819 | 30819 | -1875 | 2717 | AN0875 |
| 2053 CONTIG14 | 32402 | 32986 | 1.35 | 7.25E-02 | transcription_start_site | - | 30674 | 30674 | -2020 | 2718 | AN0875 |
| 2053 CONTIG14 | 32402 | 32986 | 1.35 | 7.25E-02 | transcription_start_site | - | 30439 | 30439 | -2255 | 2719 | AN0875 |
| 2053 CONTIG14 | 32402 | 32986 | 1.35 | 7.25E-02 | transcription_start_site | - | 30349 | 30349 | -2345 | 2720 | AN0875 |
| 2053 CONTIG14 | 32402 | 32986 | 1.35 | 7.25E-02 | transcription_start_site | + | 32812 | 32812 | -118  | 2721 | AN0876 |
| 2053 CONTIG14 | 32402 | 32986 | 1.35 | 7.25E-02 | transcription_start_site | + | 32926 | 32926 | -232  | 2722 | AN0876 |
| 2486 CONTIG14 | 48078 | 48369 | 1.21 | 1.44E-01 | transcription_start_site | - | 48502 | 48502 | 278   | 2730 | AN0880 |
| 2486 CONTIG14 | 48078 | 48369 | 1.21 | 1.44E-01 | transcription_start_site | - | 48725 | 48725 | 501   | 2729 | AN0880 |
| 2486 CONTIG14 | 48078 | 48369 | 1.21 | 1.44E-01 | transcription_start_site | + | 49117 | 49117 | -893  | 2731 | AN0881 |
| 187 CONTIG14  | 58958 | 59377 | 2.96 | 0.00E+00 | transcription_start_site | - | 55541 | 55541 | -3626 | 2737 | AN0884 |
| 187 CONTIG14  | 58958 | 59377 | 2.96 | 0.00E+00 | transcription_start_site | - | 55125 | 55125 | -4042 | 2738 | AN0884 |
| 187 CONTIG14  | 58958 | 59377 | 2.96 | 0.00E+00 | transcription_start_site | - | 58771 | 58771 | -396  | 2739 | AN0885 |
| 187 CONTIG14  | 58958 | 59377 | 2.96 | 0.00E+00 | transcription_start_site | - | 56190 | 56190 | -2977 | 2740 | AN0885 |
| 1212 CONTIG14 | 61053 | 61332 | 1.75 | 2.12E-02 | transcription_start_site | - | 58771 | 58771 | -2421 | 2739 | AN0885 |
| 1212 CONTIG14 | 61053 | 61332 | 1.75 | 2.12E-02 | transcription_start_site | - | 56190 | 56190 | -5002 | 2740 | AN0885 |
| 1212 CONTIG14 | 61053 | 61332 | 1.75 | 2.12E-02 | transcription_start_site | - | 60954 | 60954 | -238  | 2741 | AN0886 |
| 1212 CONTIG14 | 61053 | 61332 | 1.75 | 2.12E-02 | transcription_start_site | - | 60813 | 60813 | -379  | 2742 | AN0886 |
| 187 CONTIG14  | 58958 | 59377 | 2.96 | 0.00E+00 | transcription_start_site | + | 61373 | 61373 | -2205 | 2743 | AN0887 |
| 187 CONTIG14  | 58958 | 59377 | 2.96 | 0.00E+00 | transcription_start_site | + | 61490 | 61490 | -2322 | 2744 | AN0887 |
| 187 CONTIG14  | 58958 | 59377 | 2.96 | 0.00E+00 | transcription_start_site | + | 61662 | 61662 | -2494 | 2745 | AN0887 |
| 187 CONTIG14  | 58958 | 59377 | 2.96 | 0.00E+00 | transcription_start_site | + | 61986 | 61986 | -2818 | 2746 | AN0887 |
| 187 CONTIG14  | 58958 | 59377 | 2.96 | 0.00E+00 | transcription_start_site | + | 62759 | 62759 | -3591 | 2747 | AN0887 |
| 187 CONTIG14  | 58958 | 59377 | 2.96 | 0.00E+00 | transcription_start_site | + | 64110 | 64110 | -4942 | 2748 | AN0887 |
| 187 CONTIG14  | 58958 | 59377 | 2.96 | 0.00E+00 | transcription_start_site | + | 64306 | 64306 | -5138 | 2749 | AN0887 |
| 1212 CONTIG14 | 61053 | 61332 | 1.75 | 2.12E-02 | transcription_start_site | + | 61373 | 61373 | -180  | 2743 | AN0887 |
| 1212 CONTIG14 | 61053 | 61332 | 1.75 | 2.12E-02 | transcription_start_site | + | 61490 | 61490 | -297  | 2744 | AN0887 |
| 1212 CONTIG14 | 61053 | 61332 | 1.75 | 2.12E-02 | transcription_start_site | + | 61662 | 61662 | -469  | 2745 | AN0887 |
| 1212 CONTIG14 | 61053 | 61332 | 1.75 | 2.12E-02 | transcription_start_site | + | 61986 | 61986 | -793  | 2746 | AN0887 |
| 1212 CONTIG14 | 61053 | 61332 | 1.75 | 2.12E-02 | transcription_start_site | + | 62759 | 62759 | -1566 | 2747 | AN0887 |
| 1212 CONTIG14 | 61053 | 61332 | 1.75 | 2.12E-02 | transcription_start_site | + | 64110 | 64110 | -2917 | 2748 | AN0887 |
| 1212 CONTIG14 | 61053 | 61332 | 1.75 | 2.12E-02 | transcription_start_site | + | 64306 | 64306 | -3113 | 2749 | AN0887 |
| 1212 CONTIG14 | 61053 | 61332 | 1.75 | 2.12E-02 | transcription_start_site | + | 65215 | 65215 | -4022 | 2750 | AN0887 |
| 481 CONTIG14  | 72690 | 73119 | 2.47 | 1.01E-03 | transcription_start_site | - | 69320 | 69320 | -3584 | 2752 | AN0889 |
| 2054 CONTIG14 | 76595 | 77689 | 1.35 | 7.51E-02 | transcription_start_site | + | 79063 | 79063 | -1921 | 2753 | AN0890 |
| 2054 CONTIG14 | 76595 | 77689 | 1.35 | 7.51E-02 | transcription_start_site | + | 79307 | 79307 | -2165 | 2754 | AN0890 |
| 2054 CONTIG14 | 76595 | 77689 | 1.35 | 7.51E-02 | transcription_start_site | + | 80302 | 80302 | -3160 | 2755 | AN0890 |
| 1213 CONTIG14 | 96007 | 96285 | 1.75 | 2.12E-02 | transcription_start_site | - | 95146 | 95146 | -1000 | 2765 | AN0894 |
| 1213 CONTIG14 | 96007 | 96285 | 1.75 | 2.12E-02 | transcription_start_site | - | 94719 | 94719 | -1427 | 2766 | AN0894 |
| 1213 CONTIG14 | 96007 | 96285 | 1.75 | 2.12E-02 | transcription_start_site | - | 93884 | 93884 | -2262 | 2767 | AN0894 |
| 1828 CONTIG14 | 99007 | 99291 | 1.44 | 6.84E-02 | transcription_start_site | - | 95146 | 95146 | -4003 | 2765 | AN0894 |
| 1828 CONTIG14 | 99007 | 99291 | 1.44 | 6.84E-02 | transcription_start_site | - | 94719 | 94719 | -4430 | 2766 | AN0894 |
| 1213 CONTIG14 | 96007 | 96285 | 1.75 | 2.12E-02 | transcription_start_site | + | 96281 | 96281 | -135  | 2768 | AN0895 |
| 1213 CONTIG14 | 96007 | 96285 | 1.75 | 2.12E-02 | transcription_start_site | + | 97761 | 97761 | -1615 | 2769 | AN0896 |
| 1213 CONTIG14 | 96007 | 96285 | 1.75 | 2.12E-02 | transcription_start_site | + | 97999 | 97999 | -1853 | 2770 | AN0896 |
| 1213 CONTIG14 | 96007 | 96285 | 1.75 | 2.12E-02 | transcription_start_site | + | 98099 | 98099 | -1953 | 2771 | AN0896 |

|      |          |        |        |      |          |                          |   |        |        |       |      |        |
|------|----------|--------|--------|------|----------|--------------------------|---|--------|--------|-------|------|--------|
| 1213 | CONTIG14 | 96007  | 96285  | 1.75 | 2.12E-02 | transcription_start_site | + | 98223  | 98223  | -2077 | 2772 | AN0896 |
| 1213 | CONTIG14 | 96007  | 96285  | 1.75 | 2.12E-02 | transcription_start_site | + | 98396  | 98396  | -2250 | 2773 | AN0896 |
| 1828 | CONTIG14 | 99007  | 99291  | 1.44 | 6.84E-02 | transcription_start_site | + | 98396  | 98396  | 753   | 2773 | AN0896 |
| 1828 | CONTIG14 | 99007  | 99291  | 1.44 | 6.84E-02 | transcription_start_site | + | 98223  | 98223  | 926   | 2772 | AN0896 |
| 1828 | CONTIG14 | 99007  | 99291  | 1.44 | 6.84E-02 | transcription_start_site | + | 98099  | 98099  | 1050  | 2771 | AN0896 |
| 1828 | CONTIG14 | 99007  | 99291  | 1.44 | 6.84E-02 | transcription_start_site | - | 99744  | 99744  | 595   | 2774 | AN0897 |
| 1828 | CONTIG14 | 99007  | 99291  | 1.44 | 6.84E-02 | transcription_start_site | + | 101725 | 101725 | -2576 | 2775 | AN0898 |
| 1828 | CONTIG14 | 99007  | 99291  | 1.44 | 6.84E-02 | transcription_start_site | + | 101902 | 101902 | -2753 | 2776 | AN0898 |
| 1828 | CONTIG14 | 99007  | 99291  | 1.44 | 6.84E-02 | transcription_start_site | + | 102717 | 102717 | -3568 | 2777 | AN0898 |
| 1458 | CONTIG14 | 112883 | 113527 | 1.61 | 3.70E-02 | transcription_start_site | + | 113272 | 113272 | -67   | 2789 | AN0902 |
| 1458 | CONTIG14 | 112883 | 113527 | 1.61 | 3.70E-02 | transcription_start_site | + | 114132 | 114132 | -927  | 2790 | AN0902 |
| 1458 | CONTIG14 | 112883 | 113527 | 1.61 | 3.70E-02 | transcription_start_site | + | 114323 | 114323 | -1118 | 2791 | AN0902 |
| 1458 | CONTIG14 | 112883 | 113527 | 1.61 | 3.70E-02 | transcription_start_site | + | 115983 | 115983 | -2778 | 2792 | AN0903 |
| 1750 | CONTIG14 | 116183 | 116452 | 1.48 | 5.88E-02 | transcription_start_site | + | 115983 | 115983 | 334   | 2792 | AN0903 |
| 1750 | CONTIG14 | 116183 | 116452 | 1.48 | 5.88E-02 | transcription_start_site | + | 118559 | 118559 | -2241 | 2793 | AN0904 |
| 1750 | CONTIG14 | 116183 | 116452 | 1.48 | 5.88E-02 | transcription_start_site | + | 118642 | 118642 | -2324 | 2794 | AN0904 |
| 1750 | CONTIG14 | 116183 | 116452 | 1.48 | 5.88E-02 | transcription_start_site | + | 118904 | 118904 | -2586 | 2795 | AN0904 |
| 1750 | CONTIG14 | 116183 | 116452 | 1.48 | 5.88E-02 | transcription_start_site | + | 120987 | 120987 | -4669 | 2796 | AN0905 |
| 1750 | CONTIG14 | 116183 | 116452 | 1.48 | 5.88E-02 | transcription_start_site | + | 121309 | 121309 | -4991 | 2797 | AN0905 |
| 2058 | CONTIG14 | 171234 | 171513 | 1.35 | 9.24E-02 | transcription_start_site | - | 166923 | 166923 | -4450 | 2848 | AN0922 |
| 2058 | CONTIG14 | 171234 | 171513 | 1.35 | 9.24E-02 | transcription_start_site | - | 166860 | 166860 | -4513 | 2849 | AN0922 |
| 2058 | CONTIG14 | 171234 | 171513 | 1.35 | 9.24E-02 | transcription_start_site | - | 166367 | 166367 | -5006 | 2850 | AN0922 |
| 2058 | CONTIG14 | 171234 | 171513 | 1.35 | 9.24E-02 | transcription_start_site | + | 171753 | 171753 | -379  | 2853 | AN0924 |
| 2058 | CONTIG14 | 171234 | 171513 | 1.35 | 9.24E-02 | transcription_start_site | + | 171935 | 171935 | -561  | 2854 | AN0924 |
| 2058 | CONTIG14 | 171234 | 171513 | 1.35 | 9.24E-02 | transcription_start_site | + | 172050 | 172050 | -676  | 2855 | AN0924 |
| 2058 | CONTIG14 | 171234 | 171513 | 1.35 | 9.24E-02 | transcription_start_site | + | 172350 | 172350 | -976  | 2856 | AN0924 |
| 2058 | CONTIG14 | 171234 | 171513 | 1.35 | 9.24E-02 | transcription_start_site | + | 172573 | 172573 | -1199 | 2857 | AN0924 |
| 2058 | CONTIG14 | 171234 | 171513 | 1.35 | 9.24E-02 | transcription_start_site | + | 172910 | 172910 | -1536 | 2858 | AN0924 |
| 2058 | CONTIG14 | 171234 | 171513 | 1.35 | 9.24E-02 | transcription_start_site | + | 174246 | 174246 | -2872 | 2859 | AN0925 |
| 2058 | CONTIG14 | 171234 | 171513 | 1.35 | 9.24E-02 | transcription_start_site | + | 174528 | 174528 | -3154 | 2860 | AN0925 |
| 2058 | CONTIG14 | 171234 | 171513 | 1.35 | 9.24E-02 | transcription_start_site | + | 175340 | 175340 | -3966 | 2861 | AN0925 |
| 36   | CONTIG14 | 187142 | 187491 | 3.5  | 0.00E+00 | transcription_start_site | - | 183035 | 183035 | -4281 | 2865 | AN0927 |
| 36   | CONTIG14 | 187142 | 187491 | 3.5  | 0.00E+00 | transcription_start_site | - | 182889 | 182889 | -4427 | 2866 | AN0927 |
| 36   | CONTIG14 | 187142 | 187491 | 3.5  | 0.00E+00 | transcription_start_site | - | 182743 | 182743 | -4573 | 2867 | AN0927 |
| 36   | CONTIG14 | 187142 | 187491 | 3.5  | 0.00E+00 | transcription_start_site | - | 182590 | 182590 | -4726 | 2868 | AN0927 |
| 371  | CONTIG14 | 183167 | 183743 | 2.65 | 0.00E+00 | transcription_start_site | - | 183035 | 183035 | -420  | 2865 | AN0927 |
| 371  | CONTIG14 | 183167 | 183743 | 2.65 | 0.00E+00 | transcription_start_site | - | 182889 | 182889 | -566  | 2866 | AN0927 |
| 371  | CONTIG14 | 183167 | 183743 | 2.65 | 0.00E+00 | transcription_start_site | - | 182743 | 182743 | -712  | 2867 | AN0927 |
| 371  | CONTIG14 | 183167 | 183743 | 2.65 | 0.00E+00 | transcription_start_site | - | 182590 | 182590 | -865  | 2868 | AN0927 |
| 1526 | CONTIG14 | 184287 | 184631 | 1.57 | 4.36E-02 | transcription_start_site | - | 183035 | 183035 | -1424 | 2865 | AN0927 |
| 1526 | CONTIG14 | 184287 | 184631 | 1.57 | 4.36E-02 | transcription_start_site | - | 182889 | 182889 | -1570 | 2866 | AN0927 |
| 1526 | CONTIG14 | 184287 | 184631 | 1.57 | 4.36E-02 | transcription_start_site | - | 182743 | 182743 | -1716 | 2867 | AN0927 |
| 1526 | CONTIG14 | 184287 | 184631 | 1.57 | 4.36E-02 | transcription_start_site | - | 182590 | 182590 | -1869 | 2868 | AN0927 |
| 36   | CONTIG14 | 187142 | 187491 | 3.5  | 0.00E+00 | transcription_start_site | - | 185947 | 185947 | -1369 | 2869 | AN0928 |
| 36   | CONTIG14 | 187142 | 187491 | 3.5  | 0.00E+00 | transcription_start_site | - | 185788 | 185788 | -1528 | 2870 | AN0928 |
| 36   | CONTIG14 | 187142 | 187491 | 3.5  | 0.00E+00 | transcription_start_site | - | 185436 | 185436 | -1880 | 2871 | AN0928 |
| 1526 | CONTIG14 | 184287 | 184631 | 1.57 | 4.36E-02 | transcription_start_site | - | 185436 | 185436 | 977   | 2871 | AN0928 |
| 645  | CONTIG14 | 199506 | 200450 | 2.24 | 0.00E+00 | transcription_start_site | - | 195323 | 195323 | -4655 | 2872 | AN0929 |
| 645  | CONTIG14 | 199506 | 200450 | 2.24 | 0.00E+00 | transcription_start_site | - | 195048 | 195048 | -4930 | 2873 | AN0929 |
| 287  | CONTIG14 | 200646 | 200983 | 2.78 | 2.67E-04 | transcription_start_site | - | 198848 | 198848 | -1966 | 2877 | AN0930 |
| 287  | CONTIG14 | 200646 | 200983 | 2.78 | 2.67E-04 | transcription_start_site | - | 198497 | 198497 | -2317 | 2878 | AN0930 |
| 287  | CONTIG14 | 200646 | 200983 | 2.78 | 2.67E-04 | transcription_start_site | - | 198273 | 198273 | -2541 | 2879 | AN0930 |
| 287  | CONTIG14 | 200646 | 200983 | 2.78 | 2.67E-04 | transcription_start_site | - | 196988 | 196988 | -3826 | 2880 | AN0930 |
| 645  | CONTIG14 | 199506 | 200450 | 2.24 | 0.00E+00 | transcription_start_site | - | 198848 | 198848 | -1130 | 2877 | AN0930 |
| 645  | CONTIG14 | 199506 | 200450 | 2.24 | 0.00E+00 | transcription_start_site | - | 198497 | 198497 | -1481 | 2878 | AN0930 |
| 645  | CONTIG14 | 199506 | 200450 | 2.24 | 0.00E+00 | transcription_start_site | - | 198273 | 198273 | -1705 | 2879 | AN0930 |
| 645  | CONTIG14 | 199506 | 200450 | 2.24 | 0.00E+00 | transcription_start_site | - | 196988 | 196988 | -2990 | 2880 | AN0930 |

|      |          |        |        |      |          |                          |   |        |        |       |      |        |
|------|----------|--------|--------|------|----------|--------------------------|---|--------|--------|-------|------|--------|
| 287  | CONTIG14 | 200646 | 200983 | 2.78 | 2.67E-04 | transcription_start_site | + | 201478 | 201478 | -663  | 2881 | AN0931 |
| 287  | CONTIG14 | 200646 | 200983 | 2.78 | 2.67E-04 | transcription_start_site | + | 203074 | 203074 | -2259 | 2882 | AN0931 |
| 645  | CONTIG14 | 199506 | 200450 | 2.24 | 0.00E+00 | transcription_start_site | + | 201478 | 201478 | -1500 | 2881 | AN0931 |
| 645  | CONTIG14 | 199506 | 200450 | 2.24 | 0.00E+00 | transcription_start_site | + | 203074 | 203074 | -3096 | 2882 | AN0931 |
| 287  | CONTIG14 | 200646 | 200983 | 2.78 | 2.67E-04 | transcription_start_site | + | 204241 | 204241 | -3426 | 2883 | AN0932 |
| 287  | CONTIG14 | 200646 | 200983 | 2.78 | 2.67E-04 | transcription_start_site | + | 204704 | 204704 | -3889 | 2884 | AN0932 |
| 287  | CONTIG14 | 200646 | 200983 | 2.78 | 2.67E-04 | transcription_start_site | + | 205601 | 205601 | -4786 | 2885 | AN0932 |
| 645  | CONTIG14 | 199506 | 200450 | 2.24 | 0.00E+00 | transcription_start_site | + | 204241 | 204241 | -4263 | 2883 | AN0932 |
| 645  | CONTIG14 | 199506 | 200450 | 2.24 | 0.00E+00 | transcription_start_site | + | 204704 | 204704 | -4726 | 2884 | AN0932 |
| 188  | CONTIG14 | 208282 | 208701 | 2.96 | 0.00E+00 | transcription_start_site | + | 209299 | 209299 | -807  | 2886 | AN0933 |
| 188  | CONTIG14 | 208282 | 208701 | 2.96 | 0.00E+00 | transcription_start_site | + | 209447 | 209447 | -955  | 2887 | AN0933 |
| 188  | CONTIG14 | 208282 | 208701 | 2.96 | 0.00E+00 | transcription_start_site | + | 209846 | 209846 | -1354 | 2888 | AN0933 |
| 2195 | CONTIG14 | 206712 | 206991 | 1.3  | 1.08E-01 | transcription_start_site | + | 209299 | 209299 | -2447 | 2886 | AN0933 |
| 2195 | CONTIG14 | 206712 | 206991 | 1.3  | 1.08E-01 | transcription_start_site | + | 209447 | 209447 | -2595 | 2887 | AN0933 |
| 2195 | CONTIG14 | 206712 | 206991 | 1.3  | 1.08E-01 | transcription_start_site | + | 209846 | 209846 | -2994 | 2888 | AN0933 |
| 2591 | CONTIG14 | 210092 | 210591 | 1.17 | 1.66E-01 | transcription_start_site | + | 209846 | 209846 | 495   | 2888 | AN0933 |
| 2591 | CONTIG14 | 210092 | 210591 | 1.17 | 1.66E-01 | transcription_start_site | + | 209447 | 209447 | 894   | 2887 | AN0933 |
| 2591 | CONTIG14 | 210092 | 210591 | 1.17 | 1.66E-01 | transcription_start_site | + | 209299 | 209299 | 1042  | 2886 | AN0933 |
| 2591 | CONTIG14 | 210092 | 210591 | 1.17 | 1.66E-01 | transcription_start_site | + | 215529 | 215529 | -5187 | 2894 | AN0936 |
| 1355 | CONTIG14 | 245852 | 246206 | 1.66 | 3.08E-02 | transcription_start_site | - | 246682 | 246682 | 653   | 2924 | AN0947 |
| 935  | CONTIG14 | 255003 | 255357 | 1.97 | 8.81E-03 | transcription_start_site | - | 252327 | 252327 | -2853 | 2925 | AN0948 |
| 935  | CONTIG14 | 255003 | 255357 | 1.97 | 8.81E-03 | transcription_start_site | - | 252208 | 252208 | -2972 | 2926 | AN0948 |
| 935  | CONTIG14 | 255003 | 255357 | 1.97 | 8.81E-03 | transcription_start_site | - | 251967 | 251967 | -3213 | 2927 | AN0948 |
| 935  | CONTIG14 | 255003 | 255357 | 1.97 | 8.81E-03 | transcription_start_site | - | 251709 | 251709 | -3471 | 2928 | AN0948 |
| 935  | CONTIG14 | 255003 | 255357 | 1.97 | 8.81E-03 | transcription_start_site | - | 251468 | 251468 | -3712 | 2929 | AN0948 |
| 935  | CONTIG14 | 255003 | 255357 | 1.97 | 8.81E-03 | transcription_start_site | - | 251317 | 251317 | -3863 | 2930 | AN0948 |
| 935  | CONTIG14 | 255003 | 255357 | 1.97 | 8.81E-03 | transcription_start_site | - | 250168 | 250168 | -5012 | 2931 | AN0948 |
| 935  | CONTIG14 | 255003 | 255357 | 1.97 | 8.81E-03 | transcription_start_site | + | 255330 | 255330 | -150  | 2933 | AN0950 |
| 935  | CONTIG14 | 255003 | 255357 | 1.97 | 8.81E-03 | transcription_start_site | + | 255733 | 255733 | -553  | 2934 | AN0950 |
| 973  | CONTIG14 | 261244 | 261878 | 1.93 | 4.81E-03 | transcription_start_site | + | 263249 | 263249 | -1688 | 2935 | AN0951 |
| 973  | CONTIG14 | 261244 | 261878 | 1.93 | 4.81E-03 | transcription_start_site | + | 264320 | 264320 | -2759 | 2936 | AN0951 |
| 973  | CONTIG14 | 261244 | 261878 | 1.93 | 4.81E-03 | transcription_start_site | + | 266005 | 266005 | -4444 | 2937 | AN0951 |
| 1214 | CONTIG14 | 262354 | 262943 | 1.75 | 2.12E-02 | transcription_start_site | + | 263249 | 263249 | -600  | 2935 | AN0951 |
| 1214 | CONTIG14 | 262354 | 262943 | 1.75 | 2.12E-02 | transcription_start_site | + | 264320 | 264320 | -1671 | 2936 | AN0951 |
| 1214 | CONTIG14 | 262354 | 262943 | 1.75 | 2.12E-02 | transcription_start_site | + | 266005 | 266005 | -3356 | 2937 | AN0951 |
| 1449 | CONTIG14 | 312016 | 312745 | 1.61 | 2.18E-02 | transcription_start_site | - | 309781 | 309781 | -2599 | 2978 | AN0973 |
| 1449 | CONTIG14 | 312016 | 312745 | 1.61 | 2.18E-02 | transcription_start_site | - | 310920 | 310920 | -1460 | 2979 | AN0974 |
| 1639 | CONTIG14 | 325505 | 325944 | 1.52 | 5.22E-02 | transcription_start_site | - | 322049 | 322049 | -3675 | 2983 | AN0976 |
| 1639 | CONTIG14 | 325505 | 325944 | 1.52 | 5.22E-02 | transcription_start_site | - | 325686 | 325686 | -38   | 2984 | AN0977 |
| 1639 | CONTIG14 | 325505 | 325944 | 1.52 | 5.22E-02 | transcription_start_site | - | 324960 | 324960 | -764  | 2985 | AN0977 |
| 1639 | CONTIG14 | 325505 | 325944 | 1.52 | 5.22E-02 | transcription_start_site | + | 326261 | 326261 | -536  | 2986 | AN0978 |
| 1639 | CONTIG14 | 325505 | 325944 | 1.52 | 5.22E-02 | transcription_start_site | + | 326497 | 326497 | -772  | 2987 | AN0978 |
| 372  | CONTIG14 | 330835 | 331484 | 2.65 | 0.00E+00 | transcription_start_site | + | 333510 | 333510 | -2350 | 2988 | AN0979 |
| 372  | CONTIG14 | 330835 | 331484 | 2.65 | 0.00E+00 | transcription_start_site | + | 334531 | 334531 | -3371 | 2989 | AN0979 |
| 372  | CONTIG14 | 330835 | 331484 | 2.65 | 0.00E+00 | transcription_start_site | + | 335423 | 335423 | -4263 | 2990 | AN0979 |
| 372  | CONTIG14 | 330835 | 331484 | 2.65 | 0.00E+00 | transcription_start_site | + | 335837 | 335837 | -4677 | 2991 | AN0979 |
| 1450 | CONTIG14 | 332115 | 332914 | 1.61 | 2.18E-02 | transcription_start_site | + | 333510 | 333510 | -995  | 2988 | AN0979 |
| 1450 | CONTIG14 | 332115 | 332914 | 1.61 | 2.18E-02 | transcription_start_site | + | 334531 | 334531 | -2016 | 2989 | AN0979 |
| 1450 | CONTIG14 | 332115 | 332914 | 1.61 | 2.18E-02 | transcription_start_site | + | 335423 | 335423 | -2908 | 2990 | AN0979 |
| 1450 | CONTIG14 | 332115 | 332914 | 1.61 | 2.18E-02 | transcription_start_site | + | 335837 | 335837 | -3322 | 2991 | AN0979 |
| 616  | CONTIG14 | 344115 | 344397 | 2.29 | 2.22E-03 | transcription_start_site | - | 340928 | 340928 | -3328 | 2992 | AN0980 |
| 616  | CONTIG14 | 344115 | 344397 | 2.29 | 2.22E-03 | transcription_start_site | - | 339995 | 339995 | -4261 | 2993 | AN0980 |
| 616  | CONTIG14 | 344115 | 344397 | 2.29 | 2.22E-03 | transcription_start_site | - | 343707 | 343707 | -549  | 2999 | AN0981 |
| 616  | CONTIG14 | 344115 | 344397 | 2.29 | 2.22E-03 | transcription_start_site | - | 342865 | 342865 | -1391 | 3000 | AN0981 |
| 2487 | CONTIG14 | 347790 | 348127 | 1.21 | 1.44E-01 | transcription_start_site | - | 343707 | 343707 | -4251 | 2999 | AN0981 |
| 2487 | CONTIG14 | 347790 | 348127 | 1.21 | 1.44E-01 | transcription_start_site | - | 342865 | 342865 | -5093 | 3000 | AN0981 |
| 2487 | CONTIG14 | 347790 | 348127 | 1.21 | 1.44E-01 | transcription_start_site | - | 345884 | 345884 | -2074 | 3001 | AN0982 |

|               |        |        |      |          |                          |   |        |        |       |              |
|---------------|--------|--------|------|----------|--------------------------|---|--------|--------|-------|--------------|
| 2487 CONTIG14 | 347790 | 348127 | 1.21 | 1.44E-01 | transcription_start_site | - | 345731 | 345731 | -2227 | 3002 AN0982  |
| 616 CONTIG14  | 344115 | 344397 | 2.29 | 2.22E-03 | transcription_start_site | + | 347524 | 347524 | -3268 | 3003 AN0983  |
| 2487 CONTIG14 | 347790 | 348127 | 1.21 | 1.44E-01 | transcription_start_site | + | 347524 | 347524 | 434   | 3003 AN0983  |
| 2184 CONTIG14 | 354833 | 355642 | 1.3  | 8.36E-02 | transcription_start_site | - | 350997 | 350997 | -4240 | 3004 AN0984  |
| 2184 CONTIG14 | 354833 | 355642 | 1.3  | 8.36E-02 | transcription_start_site | - | 350736 | 350736 | -4501 | 3005 AN0984  |
| 2184 CONTIG14 | 354833 | 355642 | 1.3  | 8.36E-02 | transcription_start_site | - | 353039 | 353039 | -2198 | 3006 AN0985  |
| 2184 CONTIG14 | 354833 | 355642 | 1.3  | 8.36E-02 | transcription_start_site | - | 352518 | 352518 | -2719 | 3007 AN0985  |
| 2184 CONTIG14 | 354833 | 355642 | 1.3  | 8.36E-02 | transcription_start_site | - | 352345 | 352345 | -2892 | 3008 AN0985  |
| 2184 CONTIG14 | 354833 | 355642 | 1.3  | 8.36E-02 | transcription_start_site | - | 351835 | 351835 | -3402 | 3009 AN0985  |
| 2184 CONTIG14 | 354833 | 355642 | 1.3  | 8.36E-02 | transcription_start_site | + | 355879 | 355879 | -641  | 3010 AN0986  |
| 2184 CONTIG14 | 354833 | 355642 | 1.3  | 8.36E-02 | transcription_start_site | + | 356090 | 356090 | -852  | 3011 AN0986  |
| 2184 CONTIG14 | 354833 | 355642 | 1.3  | 8.36E-02 | transcription_start_site | + | 358172 | 358172 | -2934 | 3012 AN0986  |
| 2184 CONTIG14 | 354833 | 355642 | 1.3  | 8.36E-02 | transcription_start_site | + | 359006 | 359006 | -3768 | 3013 AN0987  |
| 2196 CONTIG14 | 362263 | 362606 | 1.3  | 1.08E-01 | transcription_start_site | - | 362673 | 362673 | 238   | 3014 AN0988  |
| 2196 CONTIG14 | 362263 | 362606 | 1.3  | 1.08E-01 | transcription_start_site | - | 361802 | 361802 | -632  | 3015 AN0988  |
| 2196 CONTIG14 | 362263 | 362606 | 1.3  | 1.08E-01 | transcription_start_site | - | 361670 | 361670 | -764  | 3016 AN0988  |
| 2196 CONTIG14 | 362263 | 362606 | 1.3  | 1.08E-01 | transcription_start_site | - | 361272 | 361272 | -1162 | 3017 AN0988  |
| 2196 CONTIG14 | 362263 | 362606 | 1.3  | 1.08E-01 | transcription_start_site | - | 360764 | 360764 | -1670 | 3018 AN0988  |
| 2196 CONTIG14 | 362263 | 362606 | 1.3  | 1.08E-01 | transcription_start_site | - | 360624 | 360624 | -1810 | 3019 AN0988  |
| 2352 CONTIG15 | 3471   | 4028   | 1.25 | 8.01E-02 | transcription_start_site | - | 3956   | 3956   | 206   | 3020 AN0989  |
| 2352 CONTIG15 | 3471   | 4028   | 1.25 | 8.01E-02 | transcription_start_site | - | 2834   | 2834   | -915  | 3021 AN0989  |
| 2352 CONTIG15 | 3471   | 4028   | 1.25 | 8.01E-02 | transcription_start_site | + | 4609   | 4609   | -859  | 3022 AN0990  |
| 2352 CONTIG15 | 3471   | 4028   | 1.25 | 8.01E-02 | transcription_start_site | + | 4811   | 4811   | -1061 | 3023 AN0990  |
| 2352 CONTIG15 | 3471   | 4028   | 1.25 | 8.01E-02 | transcription_start_site | + | 5210   | 5210   | -1460 | 3024 AN0990  |
| 2352 CONTIG15 | 3471   | 4028   | 1.25 | 8.01E-02 | transcription_start_site | + | 6409   | 6409   | -2659 | 3025 AN0990  |
| 2352 CONTIG15 | 3471   | 4028   | 1.25 | 8.01E-02 | transcription_start_site | + | 7139   | 7139   | -3389 | 3026 AN0990  |
| 2473 CONTIG15 | 9546   | 9820   | 1.21 | 9.24E-02 | transcription_start_site | - | 9483   | 9483   | -200  | 3027 AN0991  |
| 2473 CONTIG15 | 9546   | 9820   | 1.21 | 9.24E-02 | transcription_start_site | - | 9123   | 9123   | -560  | 3028 AN0991  |
| 2473 CONTIG15 | 9546   | 9820   | 1.21 | 9.24E-02 | transcription_start_site | - | 8702   | 8702   | -981  | 3029 AN0991  |
| 2473 CONTIG15 | 9546   | 9820   | 1.21 | 9.24E-02 | transcription_start_site | - | 8173   | 8173   | -1510 | 3030 AN0991  |
| 2473 CONTIG15 | 9546   | 9820   | 1.21 | 9.24E-02 | transcription_start_site | + | 10522  | 10522  | -839  | 3031 AN0992  |
| 2473 CONTIG15 | 9546   | 9820   | 1.21 | 9.24E-02 | transcription_start_site | + | 10995  | 10995  | -1312 | 3032 AN0992  |
| 2473 CONTIG15 | 9546   | 9820   | 1.21 | 9.24E-02 | transcription_start_site | + | 12213  | 12213  | -2530 | 3033 AN0993  |
| 2473 CONTIG15 | 9546   | 9820   | 1.21 | 9.24E-02 | transcription_start_site | + | 12469  | 12469  | -2786 | 3034 AN0993  |
| 2473 CONTIG15 | 9546   | 9820   | 1.21 | 9.24E-02 | transcription_start_site | + | 12569  | 12569  | -2886 | 3035 AN0993  |
| 2473 CONTIG15 | 9546   | 9820   | 1.21 | 9.24E-02 | transcription_start_site | + | 12816  | 12816  | -3133 | 3036 AN0993  |
| 2473 CONTIG15 | 9546   | 9820   | 1.21 | 9.24E-02 | transcription_start_site | + | 13016  | 13016  | -3333 | 3037 AN0993  |
| 2473 CONTIG15 | 9546   | 9820   | 1.21 | 9.24E-02 | transcription_start_site | + | 13129  | 13129  | -3446 | 3038 AN0993  |
| 2473 CONTIG15 | 9546   | 9820   | 1.21 | 9.24E-02 | transcription_start_site | + | 13439  | 13439  | -3756 | 3039 AN0993  |
| 1396 CONTIG3  | 80721  | 81065  | 1.63 | 1.57E-02 | transcription_start_site | - | 76110  | 76110  | -4783 | 3090 AN10013 |
| 405 CONTIG3   | 20038  | 20617  | 2.59 | 0.00E+00 | transcription_start_site | + | 21825  | 21825  | -1497 | 3091 AN10014 |
| 656 CONTIG3   | 18908  | 19257  | 2.23 | 9.51E-04 | transcription_start_site | + | 21825  | 21825  | -2742 | 3091 AN10014 |
| 1396 CONTIG3  | 80721  | 81065  | 1.63 | 1.57E-02 | transcription_start_site | + | 82782  | 82782  | -1889 | 3092 AN10015 |
| 2560 CONTIG4  | 61964  | 62233  | 1.18 | 9.24E-02 | transcription_start_site | - | 57523  | 57523  | -4575 | 3096 AN10017 |
| 2560 CONTIG4  | 61964  | 62233  | 1.18 | 9.24E-02 | transcription_start_site | - | 57355  | 57355  | -4743 | 3097 AN10017 |
| 2560 CONTIG4  | 61964  | 62233  | 1.18 | 9.24E-02 | transcription_start_site | - | 57177  | 57177  | -4921 | 3098 AN10017 |
| 1303 CONTIG4  | 63079  | 63353  | 1.69 | 1.11E-02 | transcription_start_site | - | 59182  | 59182  | -4034 | 3104 AN10018 |
| 1303 CONTIG4  | 63079  | 63353  | 1.69 | 1.11E-02 | transcription_start_site | - | 59052  | 59052  | -4164 | 3105 AN10018 |
| 2560 CONTIG4  | 61964  | 62233  | 1.18 | 9.24E-02 | transcription_start_site | - | 59182  | 59182  | -2916 | 3104 AN10018 |
| 2560 CONTIG4  | 61964  | 62233  | 1.18 | 9.24E-02 | transcription_start_site | - | 59052  | 59052  | -3046 | 3105 AN10018 |
| 1303 CONTIG4  | 63079  | 63353  | 1.69 | 1.11E-02 | transcription_start_site | - | 62720  | 62720  | -496  | 3106 AN10019 |
| 1303 CONTIG4  | 63079  | 63353  | 1.69 | 1.11E-02 | transcription_start_site | - | 62585  | 62585  | -631  | 3107 AN10019 |
| 1303 CONTIG4  | 63079  | 63353  | 1.69 | 1.11E-02 | transcription_start_site | - | 62225  | 62225  | -991  | 3108 AN10019 |
| 1303 CONTIG4  | 63079  | 63353  | 1.69 | 1.11E-02 | transcription_start_site | - | 60800  | 60800  | -2416 | 3109 AN10019 |
| 2560 CONTIG4  | 61964  | 62233  | 1.18 | 9.24E-02 | transcription_start_site | - | 62225  | 62225  | 126   | 3108 AN10019 |
| 2560 CONTIG4  | 61964  | 62233  | 1.18 | 9.24E-02 | transcription_start_site | - | 62585  | 62585  | 486   | 3107 AN10019 |
| 2560 CONTIG4  | 61964  | 62233  | 1.18 | 9.24E-02 | transcription_start_site | - | 62720  | 62720  | 621   | 3106 AN10019 |

|      |          |        |        |      |          |                          |   |        |        |       |      |         |
|------|----------|--------|--------|------|----------|--------------------------|---|--------|--------|-------|------|---------|
| 2560 | CONTIG4  | 61964  | 62233  | 1.18 | 9.24E-02 | transcription_start_site | - | 60800  | 60800  | -1298 | 3109 | AN10019 |
| 3011 | CONTIG4  | 64444  | 65903  | 0.9  | 1.58E-01 | transcription_start_site | - | 62720  | 62720  | -2453 | 3106 | AN10019 |
| 3011 | CONTIG4  | 64444  | 65903  | 0.9  | 1.58E-01 | transcription_start_site | - | 62585  | 62585  | -2588 | 3107 | AN10019 |
| 3011 | CONTIG4  | 64444  | 65903  | 0.9  | 1.58E-01 | transcription_start_site | - | 62225  | 62225  | -2948 | 3108 | AN10019 |
| 3011 | CONTIG4  | 64444  | 65903  | 0.9  | 1.58E-01 | transcription_start_site | - | 60800  | 60800  | -4373 | 3109 | AN10019 |
| 1997 | CONTIG15 | 39242  | 39506  | 1.37 | 5.22E-02 | transcription_start_site | - | 39152  | 39152  | -222  | 3110 | AN1002  |
| 1997 | CONTIG15 | 39242  | 39506  | 1.37 | 5.22E-02 | transcription_start_site | - | 36733  | 36733  | -2641 | 3111 | AN1002  |
| 501  | CONTIG5  | 3471   | 3725   | 2.45 | 8.81E-03 | transcription_start_site | - | 3747   | 3747   | 149   | 3118 | AN10021 |
| 501  | CONTIG5  | 3471   | 3725   | 2.45 | 8.81E-03 | transcription_start_site | - | 4570   | 4570   | 972   | 3117 | AN10021 |
| 1816 | CONTIG5  | 217821 | 218095 | 1.45 | 1.66E-01 | transcription_start_site | - | 217284 | 217284 | -674  | 3137 | AN10028 |
| 1816 | CONTIG5  | 217821 | 218095 | 1.45 | 1.66E-01 | transcription_start_site | - | 217145 | 217145 | -813  | 3138 | AN10028 |
| 1816 | CONTIG5  | 217821 | 218095 | 1.45 | 1.66E-01 | transcription_start_site | - | 216954 | 216954 | -1004 | 3139 | AN10028 |
| 1816 | CONTIG5  | 217821 | 218095 | 1.45 | 1.66E-01 | transcription_start_site | - | 215840 | 215840 | -2118 | 3140 | AN10028 |
| 1816 | CONTIG5  | 217821 | 218095 | 1.45 | 1.66E-01 | transcription_start_site | - | 215656 | 215656 | -2302 | 3141 | AN10028 |
| 1817 | CONTIG5  | 218711 | 219070 | 1.45 | 1.66E-01 | transcription_start_site | - | 217284 | 217284 | -1606 | 3137 | AN10028 |
| 1817 | CONTIG5  | 218711 | 219070 | 1.45 | 1.66E-01 | transcription_start_site | - | 217145 | 217145 | -1745 | 3138 | AN10028 |
| 1817 | CONTIG5  | 218711 | 219070 | 1.45 | 1.66E-01 | transcription_start_site | - | 216954 | 216954 | -1936 | 3139 | AN10028 |
| 1817 | CONTIG5  | 218711 | 219070 | 1.45 | 1.66E-01 | transcription_start_site | - | 215840 | 215840 | -3050 | 3140 | AN10028 |
| 1817 | CONTIG5  | 218711 | 219070 | 1.45 | 1.66E-01 | transcription_start_site | - | 215656 | 215656 | -3234 | 3141 | AN10028 |
| 1997 | CONTIG15 | 39242  | 39506  | 1.37 | 5.22E-02 | transcription_start_site | + | 39578  | 39578  | -204  | 3145 | AN1003  |
| 1997 | CONTIG15 | 39242  | 39506  | 1.37 | 5.22E-02 | transcription_start_site | + | 39733  | 39733  | -359  | 3146 | AN1003  |
| 1997 | CONTIG15 | 39242  | 39506  | 1.37 | 5.22E-02 | transcription_start_site | + | 39956  | 39956  | -582  | 3147 | AN1003  |
| 1997 | CONTIG15 | 39242  | 39506  | 1.37 | 5.22E-02 | transcription_start_site | + | 40101  | 40101  | -727  | 3148 | AN1003  |
| 1997 | CONTIG15 | 39242  | 39506  | 1.37 | 5.22E-02 | transcription_start_site | + | 40273  | 40273  | -899  | 3149 | AN1003  |
| 1997 | CONTIG15 | 39242  | 39506  | 1.37 | 5.22E-02 | transcription_start_site | + | 41049  | 41049  | -1675 | 3150 | AN1003  |
| 100  | CONTIG5  | 275713 | 276064 | 3.23 | 5.64E-04 | transcription_start_site | - | 276362 | 276362 | 473   | 3153 | AN10030 |
| 734  | CONTIG5  | 276678 | 277107 | 2.17 | 1.06E-02 | transcription_start_site | - | 277336 | 277336 | 443   | 3152 | AN10030 |
| 734  | CONTIG5  | 276678 | 277107 | 2.17 | 1.06E-02 | transcription_start_site | - | 276362 | 276362 | -530  | 3153 | AN10030 |
| 734  | CONTIG5  | 276678 | 277107 | 2.17 | 1.06E-02 | transcription_start_site | - | 277772 | 277772 | 879   | 3151 | AN10030 |
| 1180 | CONTIG5  | 277963 | 278324 | 1.78 | 6.84E-02 | transcription_start_site | - | 277772 | 277772 | -371  | 3151 | AN10030 |
| 1180 | CONTIG5  | 277963 | 278324 | 1.78 | 6.84E-02 | transcription_start_site | - | 277336 | 277336 | -807  | 3152 | AN10030 |
| 1180 | CONTIG5  | 277963 | 278324 | 1.78 | 6.84E-02 | transcription_start_site | - | 276362 | 276362 | -1781 | 3153 | AN10030 |
| 739  | CONTIG5  | 372977 | 373331 | 2.17 | 2.12E-02 | transcription_start_site | - | 369979 | 369979 | -3175 | 3154 | AN10031 |
| 13   | CONTIG5  | 397516 | 398017 | 3.67 | 0.00E+00 | transcription_start_site | - | 392771 | 392771 | -4995 | 3155 | AN10032 |
| 13   | CONTIG5  | 397516 | 398017 | 3.67 | 0.00E+00 | transcription_start_site | - | 392569 | 392569 | -5197 | 3156 | AN10032 |
| 843  | CONTIG5  | 95479  | 96368  | 2.06 | 1.81E-02 | transcription_start_site | + | 94594  | 94594  | 1329  | 3164 | AN10033 |
| 501  | CONTIG5  | 3471   | 3725   | 2.45 | 8.81E-03 | transcription_start_site | - | 2407   | 2407   | -1191 | 3176 | AN10039 |
| 100  | CONTIG5  | 275713 | 276064 | 3.23 | 5.64E-04 | transcription_start_site | - | 275377 | 275377 | -511  | 3180 | AN10040 |
| 734  | CONTIG5  | 276678 | 277107 | 2.17 | 1.06E-02 | transcription_start_site | - | 275377 | 275377 | -1515 | 3180 | AN10040 |
| 1180 | CONTIG5  | 277963 | 278324 | 1.78 | 6.84E-02 | transcription_start_site | - | 275377 | 275377 | -2766 | 3180 | AN10040 |
| 1816 | CONTIG5  | 217821 | 218095 | 1.45 | 1.66E-01 | transcription_start_site | - | 218047 | 218047 | 89    | 3183 | AN10041 |
| 1816 | CONTIG5  | 217821 | 218095 | 1.45 | 1.66E-01 | transcription_start_site | - | 218378 | 218378 | 420   | 3182 | AN10041 |
| 1816 | CONTIG5  | 217821 | 218095 | 1.45 | 1.66E-01 | transcription_start_site | - | 218843 | 218843 | 885   | 3181 | AN10041 |
| 1817 | CONTIG5  | 218711 | 219070 | 1.45 | 1.66E-01 | transcription_start_site | - | 218843 | 218843 | -47   | 3181 | AN10041 |
| 1817 | CONTIG5  | 218711 | 219070 | 1.45 | 1.66E-01 | transcription_start_site | - | 218378 | 218378 | -512  | 3182 | AN10041 |
| 1817 | CONTIG5  | 218711 | 219070 | 1.45 | 1.66E-01 | transcription_start_site | - | 218047 | 218047 | -843  | 3183 | AN10041 |
| 548  | CONTIG5  | 245490 | 245776 | 2.39 | 1.11E-02 | transcription_start_site | + | 247523 | 247523 | -1890 | 3192 | AN10045 |
| 739  | CONTIG5  | 372977 | 373331 | 2.17 | 2.12E-02 | transcription_start_site | - | 368821 | 368821 | -4333 | 3193 | AN10046 |
| 1997 | CONTIG15 | 39242  | 39506  | 1.37 | 5.22E-02 | transcription_start_site | + | 42684  | 42684  | -3310 | 3200 | AN1005  |
| 1997 | CONTIG15 | 39242  | 39506  | 1.37 | 5.22E-02 | transcription_start_site | + | 42857  | 42857  | -3483 | 3201 | AN1005  |
| 29   | CONTIG5  | 424967 | 425601 | 3.56 | 0.00E+00 | transcription_start_site | - | 424938 | 424938 | -346  | 3202 | AN10050 |
| 29   | CONTIG5  | 424967 | 425601 | 3.56 | 0.00E+00 | transcription_start_site | - | 424773 | 424773 | -511  | 3203 | AN10050 |
| 245  | CONTIG5  | 426090 | 426814 | 2.84 | 0.00E+00 | transcription_start_site | - | 424938 | 424938 | -1514 | 3202 | AN10050 |
| 245  | CONTIG5  | 426090 | 426814 | 2.84 | 0.00E+00 | transcription_start_site | - | 424773 | 424773 | -1679 | 3203 | AN10050 |
| 1343 | CONTIG5  | 428480 | 428906 | 1.67 | 9.24E-02 | transcription_start_site | - | 424938 | 424938 | -3755 | 3202 | AN10050 |
| 1343 | CONTIG5  | 428480 | 428906 | 1.67 | 9.24E-02 | transcription_start_site | - | 424773 | 424773 | -3920 | 3203 | AN10050 |
| 29   | CONTIG5  | 424967 | 425601 | 3.56 | 0.00E+00 | transcription_start_site | - | 425666 | 425666 | 382   | 3204 | AN10051 |

|      |         |        |        |      |          |                          |   |        |        |       |      |         |
|------|---------|--------|--------|------|----------|--------------------------|---|--------|--------|-------|------|---------|
| 245  | CONTIG5 | 426090 | 426814 | 2.84 | 0.00E+00 | transcription_start_site | - | 425666 | 425666 | -786  | 3204 | AN10051 |
| 1343 | CONTIG5 | 428480 | 428906 | 1.67 | 9.24E-02 | transcription_start_site | - | 425666 | 425666 | -3027 | 3204 | AN10051 |
| 176  | CONTIG6 | 87761  | 88408  | 2.99 | 0.00E+00 | transcription_start_site | - | 87170  | 87170  | -914  | 3208 | AN10053 |
| 176  | CONTIG6 | 87761  | 88408  | 2.99 | 0.00E+00 | transcription_start_site | - | 86552  | 86552  | -1532 | 3209 | AN10053 |
| 1810 | CONTIG6 | 198021 | 198275 | 1.45 | 5.22E-02 | transcription_start_site | + | 202565 | 202565 | -4417 | 3222 | AN10057 |
| 1810 | CONTIG6 | 198021 | 198275 | 1.45 | 5.22E-02 | transcription_start_site | + | 203086 | 203086 | -4938 | 3223 | AN10057 |
| 987  | CONTIG6 | 208818 | 209157 | 1.92 | 7.85E-03 | transcription_start_site | + | 212242 | 212242 | -3254 | 3225 | AN10058 |
| 987  | CONTIG6 | 208818 | 209157 | 1.92 | 7.85E-03 | transcription_start_site | + | 212529 | 212529 | -3541 | 3226 | AN10058 |
| 987  | CONTIG6 | 208818 | 209157 | 1.92 | 7.85E-03 | transcription_start_site | + | 213676 | 213676 | -4688 | 3227 | AN10058 |
| 2377 | CONTIG6 | 210528 | 211332 | 1.24 | 1.08E-01 | transcription_start_site | + | 212242 | 212242 | -1312 | 3225 | AN10058 |
| 2377 | CONTIG6 | 210528 | 211332 | 1.24 | 1.08E-01 | transcription_start_site | + | 212529 | 212529 | -1599 | 3226 | AN10058 |
| 2377 | CONTIG6 | 210528 | 211332 | 1.24 | 1.08E-01 | transcription_start_site | + | 213676 | 213676 | -2746 | 3227 | AN10058 |
| 2531 | CONTIG6 | 244884 | 245228 | 1.19 | 1.25E-01 | transcription_start_site | + | 246337 | 246337 | -1281 | 3228 | AN10059 |
| 2531 | CONTIG6 | 244884 | 245228 | 1.19 | 1.25E-01 | transcription_start_site | + | 247520 | 247520 | -2464 | 3229 | AN10059 |
| 2531 | CONTIG6 | 244884 | 245228 | 1.19 | 1.25E-01 | transcription_start_site | + | 248526 | 248526 | -3470 | 3230 | AN10059 |
| 2799 | CONTIG6 | 175746 | 176170 | 1.07 | 1.93E-01 | transcription_start_site | + | 176173 | 176173 | -215  | 3238 | AN10060 |
| 2799 | CONTIG6 | 175746 | 176170 | 1.07 | 1.93E-01 | transcription_start_site | + | 176440 | 176440 | -482  | 3239 | AN10060 |
| 2799 | CONTIG6 | 175746 | 176170 | 1.07 | 1.93E-01 | transcription_start_site | + | 180841 | 180841 | -4883 | 3240 | AN10060 |
| 1810 | CONTIG6 | 198021 | 198275 | 1.45 | 5.22E-02 | transcription_start_site | + | 199263 | 199263 | -1115 | 3241 | AN10061 |
| 1810 | CONTIG6 | 198021 | 198275 | 1.45 | 5.22E-02 | transcription_start_site | + | 199427 | 199427 | -1279 | 3242 | AN10061 |
| 1810 | CONTIG6 | 198021 | 198275 | 1.45 | 5.22E-02 | transcription_start_site | + | 201734 | 201734 | -3586 | 3243 | AN10061 |
| 2730 | CONTIG6 | 194946 | 195357 | 1.11 | 1.50E-01 | transcription_start_site | + | 199263 | 199263 | -4111 | 3241 | AN10061 |
| 2730 | CONTIG6 | 194946 | 195357 | 1.11 | 1.50E-01 | transcription_start_site | + | 199427 | 199427 | -4275 | 3242 | AN10061 |
| 987  | CONTIG6 | 208818 | 209157 | 1.92 | 7.85E-03 | transcription_start_site | + | 209144 | 209144 | -156  | 3258 | AN10068 |
| 987  | CONTIG6 | 208818 | 209157 | 1.92 | 7.85E-03 | transcription_start_site | + | 209639 | 209639 | -651  | 3259 | AN10068 |
| 987  | CONTIG6 | 208818 | 209157 | 1.92 | 7.85E-03 | transcription_start_site | + | 209938 | 209938 | -950  | 3260 | AN10068 |
| 2377 | CONTIG6 | 210528 | 211332 | 1.24 | 1.08E-01 | transcription_start_site | + | 209938 | 209938 | 992   | 3260 | AN10068 |
| 2377 | CONTIG6 | 210528 | 211332 | 1.24 | 1.08E-01 | transcription_start_site | + | 209639 | 209639 | 1291  | 3259 | AN10068 |
| 2531 | CONTIG6 | 244884 | 245228 | 1.19 | 1.25E-01 | transcription_start_site | + | 249053 | 249053 | -3997 | 3261 | AN10069 |
| 2531 | CONTIG6 | 244884 | 245228 | 1.19 | 1.25E-01 | transcription_start_site | + | 249560 | 249560 | -4504 | 3262 | AN10069 |
| 176  | CONTIG6 | 87761  | 88408  | 2.99 | 0.00E+00 | transcription_start_site | - | 85532  | 85532  | -2552 | 3273 | AN10071 |
| 176  | CONTIG6 | 87761  | 88408  | 2.99 | 0.00E+00 | transcription_start_site | - | 84609  | 84609  | -3475 | 3274 | AN10071 |
| 812  | CONTIG7 | 145354 | 145628 | 2.09 | 4.61E-03 | transcription_start_site | - | 145192 | 145192 | -299  | 3294 | AN10077 |
| 812  | CONTIG7 | 145354 | 145628 | 2.09 | 4.61E-03 | transcription_start_site | - | 145012 | 145012 | -479  | 3295 | AN10077 |
| 812  | CONTIG7 | 145354 | 145628 | 2.09 | 4.61E-03 | transcription_start_site | - | 143846 | 143846 | -1645 | 3296 | AN10077 |
| 812  | CONTIG7 | 145354 | 145628 | 2.09 | 4.61E-03 | transcription_start_site | - | 143637 | 143637 | -1854 | 3297 | AN10077 |
| 812  | CONTIG7 | 145354 | 145628 | 2.09 | 4.61E-03 | transcription_start_site | - | 143473 | 143473 | -2018 | 3298 | AN10077 |
| 812  | CONTIG7 | 145354 | 145628 | 2.09 | 4.61E-03 | transcription_start_site | + | 146985 | 146985 | -1494 | 3299 | AN10078 |
| 632  | CONTIG7 | 166821 | 167236 | 2.26 | 1.80E-03 | transcription_start_site | - | 164667 | 164667 | -2361 | 3300 | AN10079 |
| 632  | CONTIG7 | 166821 | 167236 | 2.26 | 1.80E-03 | transcription_start_site | - | 164555 | 164555 | -2473 | 3301 | AN10079 |
| 632  | CONTIG7 | 166821 | 167236 | 2.26 | 1.80E-03 | transcription_start_site | - | 164380 | 164380 | -2648 | 3302 | AN10079 |
| 632  | CONTIG7 | 166821 | 167236 | 2.26 | 1.80E-03 | transcription_start_site | - | 164302 | 164302 | -2726 | 3303 | AN10079 |
| 632  | CONTIG7 | 166821 | 167236 | 2.26 | 1.80E-03 | transcription_start_site | - | 162180 | 162180 | -4848 | 3304 | AN10079 |
| 632  | CONTIG7 | 166821 | 167236 | 2.26 | 1.80E-03 | transcription_start_site | - | 162063 | 162063 | -4965 | 3305 | AN10079 |
| 1442 | CONTIG7 | 228546 | 230375 | 1.61 | 0.00E+00 | transcription_start_site | + | 232619 | 232619 | -3158 | 3310 | AN10080 |
| 1442 | CONTIG7 | 228546 | 230375 | 1.61 | 0.00E+00 | transcription_start_site | + | 234062 | 234062 | -4601 | 3311 | AN10080 |
| 2438 | CONTIG7 | 231231 | 231650 | 1.22 | 1.25E-01 | transcription_start_site | + | 232619 | 232619 | -1178 | 3310 | AN10080 |
| 2438 | CONTIG7 | 231231 | 231650 | 1.22 | 1.25E-01 | transcription_start_site | + | 234062 | 234062 | -2621 | 3311 | AN10080 |
| 2765 | CONTIG7 | 338792 | 339126 | 1.09 | 1.93E-01 | transcription_start_site | - | 334390 | 334390 | -4569 | 3312 | AN10081 |
| 2765 | CONTIG7 | 338792 | 339126 | 1.09 | 1.93E-01 | transcription_start_site | - | 334184 | 334184 | -4775 | 3313 | AN10081 |
| 2845 | CONTIG7 | 390686 | 391791 | 1.04 | 1.64E-01 | transcription_start_site | - | 386809 | 386809 | -4429 | 3324 | AN10084 |
| 2845 | CONTIG7 | 390686 | 391791 | 1.04 | 1.64E-01 | transcription_start_site | - | 386222 | 386222 | -5016 | 3325 | AN10084 |
| 766  | CONTIG7 | 547596 | 547935 | 2.13 | 3.61E-03 | transcription_start_site | + | 550054 | 550054 | -2288 | 3332 | AN10086 |
| 766  | CONTIG7 | 547596 | 547935 | 2.13 | 3.61E-03 | transcription_start_site | + | 550361 | 550361 | -2595 | 3333 | AN10086 |
| 766  | CONTIG7 | 547596 | 547935 | 2.13 | 3.61E-03 | transcription_start_site | + | 551582 | 551582 | -3816 | 3334 | AN10086 |
| 2436 | CONTIG7 | 551046 | 551600 | 1.22 | 1.07E-01 | transcription_start_site | + | 551582 | 551582 | -259  | 3334 | AN10086 |
| 2436 | CONTIG7 | 551046 | 551600 | 1.22 | 1.07E-01 | transcription_start_site | + | 550361 | 550361 | 962   | 3333 | AN10086 |



|      |          |        |        |      |          |                          |   |        |        |       |      |         |
|------|----------|--------|--------|------|----------|--------------------------|---|--------|--------|-------|------|---------|
| 2436 | CONTIG7  | 551046 | 551600 | 1.22 | 1.07E-01 | transcription_start_site | + | 550054 | 550054 | 1269  | 3332 | AN10086 |
| 812  | CONTIG7  | 145354 | 145628 | 2.09 | 4.61E-03 | transcription_start_site | - | 142160 | 142160 | -3331 | 3340 | AN10088 |
| 812  | CONTIG7  | 145354 | 145628 | 2.09 | 4.61E-03 | transcription_start_site | - | 141943 | 141943 | -3548 | 3341 | AN10088 |
| 812  | CONTIG7  | 145354 | 145628 | 2.09 | 4.61E-03 | transcription_start_site | - | 141855 | 141855 | -3636 | 3342 | AN10088 |
| 812  | CONTIG7  | 145354 | 145628 | 2.09 | 4.61E-03 | transcription_start_site | - | 141721 | 141721 | -3770 | 3343 | AN10088 |
| 812  | CONTIG7  | 145354 | 145628 | 2.09 | 4.61E-03 | transcription_start_site | - | 141372 | 141372 | -4119 | 3344 | AN10088 |
| 812  | CONTIG7  | 145354 | 145628 | 2.09 | 4.61E-03 | transcription_start_site | - | 140831 | 140831 | -4660 | 3345 | AN10088 |
| 812  | CONTIG7  | 145354 | 145628 | 2.09 | 4.61E-03 | transcription_start_site | + | 149820 | 149820 | -4329 | 3346 | AN10089 |
| 812  | CONTIG7  | 145354 | 145628 | 2.09 | 4.61E-03 | transcription_start_site | + | 150185 | 150185 | -4694 | 3347 | AN10089 |
| 812  | CONTIG7  | 145354 | 145628 | 2.09 | 4.61E-03 | transcription_start_site | + | 150520 | 150520 | -5029 | 3348 | AN10089 |
| 419  | CONTIG7  | 236346 | 236620 | 2.57 | 6.10E-04 | transcription_start_site | + | 235590 | 235590 | 893   | 3352 | AN10090 |
| 2438 | CONTIG7  | 231231 | 231650 | 1.22 | 1.25E-01 | transcription_start_site | + | 235590 | 235590 | -4149 | 3352 | AN10090 |
| 2187 | CONTIG7  | 240996 | 241270 | 1.3  | 9.24E-02 | transcription_start_site | + | 241969 | 241969 | -836  | 3353 | AN10091 |
| 2187 | CONTIG7  | 240996 | 241270 | 1.3  | 9.24E-02 | transcription_start_site | + | 242302 | 242302 | -1169 | 3354 | AN10091 |
| 2187 | CONTIG7  | 240996 | 241270 | 1.3  | 9.24E-02 | transcription_start_site | + | 242502 | 242502 | -1369 | 3355 | AN10091 |
| 2688 | CONTIG7  | 239041 | 239320 | 1.13 | 1.66E-01 | transcription_start_site | + | 241969 | 241969 | -2788 | 3353 | AN10091 |
| 2688 | CONTIG7  | 239041 | 239320 | 1.13 | 1.66E-01 | transcription_start_site | + | 242302 | 242302 | -3121 | 3354 | AN10091 |
| 2688 | CONTIG7  | 239041 | 239320 | 1.13 | 1.66E-01 | transcription_start_site | + | 242502 | 242502 | -3321 | 3355 | AN10091 |
| 1747 | CONTIG7  | 331662 | 332166 | 1.48 | 5.22E-02 | transcription_start_site | + | 336103 | 336103 | -4189 | 3359 | AN10094 |
| 1747 | CONTIG7  | 331662 | 332166 | 1.48 | 5.22E-02 | transcription_start_site | + | 336571 | 336571 | -4657 | 3360 | AN10094 |
| 2765 | CONTIG7  | 338792 | 339126 | 1.09 | 1.93E-01 | transcription_start_site | + | 343981 | 343981 | -5022 | 3361 | AN10095 |
| 946  | CONTIG7  | 357842 | 358186 | 1.96 | 7.85E-03 | transcription_start_site | - | 359111 | 359111 | 1097  | 3366 | AN10097 |
| 1747 | CONTIG7  | 331662 | 332166 | 1.48 | 5.22E-02 | transcription_start_site | - | 332324 | 332324 | 410   | 3367 | AN10098 |
| 766  | CONTIG7  | 547596 | 547935 | 2.13 | 3.61E-03 | transcription_start_site | + | 548723 | 548723 | -957  | 3368 | AN10099 |
| 766  | CONTIG7  | 547596 | 547935 | 2.13 | 3.61E-03 | transcription_start_site | + | 549179 | 549179 | -1413 | 3369 | AN10099 |
| 2903 | CONTIG15 | 62930  | 63294  | 1    | 1.79E-01 | transcription_start_site | - | 59555  | 59555  | -3557 | 3370 | AN1010  |
| 2903 | CONTIG15 | 62930  | 63294  | 1    | 1.79E-01 | transcription_start_site | - | 58690  | 58690  | -4422 | 3371 | AN1010  |
| 2903 | CONTIG15 | 62930  | 63294  | 1    | 1.79E-01 | transcription_start_site | - | 58581  | 58581  | -4531 | 3372 | AN1010  |
| 632  | CONTIG7  | 166821 | 167236 | 2.26 | 1.80E-03 | transcription_start_site | - | 166660 | 166660 | -368  | 3380 | AN10103 |
| 632  | CONTIG7  | 166821 | 167236 | 2.26 | 1.80E-03 | transcription_start_site | - | 166186 | 166186 | -842  | 3381 | AN10103 |
| 632  | CONTIG7  | 166821 | 167236 | 2.26 | 1.80E-03 | transcription_start_site | - | 165748 | 165748 | -1280 | 3382 | AN10103 |
| 2586 | CONTIG7  | 427354 | 427638 | 1.17 | 1.44E-01 | transcription_start_site | + | 427439 | 427439 | 57    | 3383 | AN10104 |
| 2586 | CONTIG7  | 427354 | 427638 | 1.17 | 1.44E-01 | transcription_start_site | + | 427933 | 427933 | -437  | 3384 | AN10104 |
| 1813 | CONTIG10 | 151351 | 151635 | 1.45 | 8.01E-02 | transcription_start_site | + | 150801 | 150801 | 692   | 3398 | AN10109 |
| 2106 | CONTIG15 | 65195  | 65459  | 1.33 | 5.88E-02 | transcription_start_site | - | 61066  | 61066  | -4261 | 3399 | AN1011  |
| 2106 | CONTIG15 | 65195  | 65459  | 1.33 | 5.88E-02 | transcription_start_site | - | 60915  | 60915  | -4412 | 3400 | AN1011  |
| 2106 | CONTIG15 | 65195  | 65459  | 1.33 | 5.88E-02 | transcription_start_site | - | 60608  | 60608  | -4719 | 3401 | AN1011  |
| 2106 | CONTIG15 | 65195  | 65459  | 1.33 | 5.88E-02 | transcription_start_site | - | 60387  | 60387  | -4940 | 3402 | AN1011  |
| 2106 | CONTIG15 | 65195  | 65459  | 1.33 | 5.88E-02 | transcription_start_site | - | 60271  | 60271  | -5056 | 3403 | AN1011  |
| 2903 | CONTIG15 | 62930  | 63294  | 1    | 1.79E-01 | transcription_start_site | - | 61066  | 61066  | -2046 | 3399 | AN1011  |
| 2903 | CONTIG15 | 62930  | 63294  | 1    | 1.79E-01 | transcription_start_site | - | 60915  | 60915  | -2197 | 3400 | AN1011  |
| 2903 | CONTIG15 | 62930  | 63294  | 1    | 1.79E-01 | transcription_start_site | - | 60608  | 60608  | -2504 | 3401 | AN1011  |
| 2903 | CONTIG15 | 62930  | 63294  | 1    | 1.79E-01 | transcription_start_site | - | 60387  | 60387  | -2725 | 3402 | AN1011  |
| 2903 | CONTIG15 | 62930  | 63294  | 1    | 1.79E-01 | transcription_start_site | - | 60271  | 60271  | -2841 | 3403 | AN1011  |
| 1813 | CONTIG10 | 151351 | 151635 | 1.45 | 8.01E-02 | transcription_start_site | + | 151459 | 151459 | 34    | 3410 | AN10113 |
| 1813 | CONTIG10 | 151351 | 151635 | 1.45 | 8.01E-02 | transcription_start_site | + | 151389 | 151389 | 104   | 3409 | AN10113 |
| 2152 | CONTIG11 | 49954  | 50544  | 1.32 | 1.66E-01 | transcription_start_site | + | 54152  | 54152  | -3903 | 3412 | AN10115 |
| 2152 | CONTIG11 | 49954  | 50544  | 1.32 | 1.66E-01 | transcription_start_site | + | 55064  | 55064  | -4815 | 3413 | AN10115 |
| 2152 | CONTIG11 | 49954  | 50544  | 1.32 | 1.66E-01 | transcription_start_site | + | 55294  | 55294  | -5045 | 3414 | AN10115 |
| 2152 | CONTIG11 | 49954  | 50544  | 1.32 | 1.66E-01 | transcription_start_site | + | 51163  | 51163  | -914  | 3416 | AN10116 |
| 2152 | CONTIG11 | 49954  | 50544  | 1.32 | 1.66E-01 | transcription_start_site | + | 51357  | 51357  | -1108 | 3417 | AN10116 |
| 2152 | CONTIG11 | 49954  | 50544  | 1.32 | 1.66E-01 | transcription_start_site | + | 51535  | 51535  | -1286 | 3418 | AN10116 |
| 465  | CONTIG12 | 132087 | 132426 | 2.49 | 1.22E-03 | transcription_start_site | - | 127292 | 127292 | -4964 | 3426 | AN10119 |
| 1548 | CONTIG12 | 146851 | 147215 | 1.56 | 3.33E-02 | transcription_start_site | - | 142697 | 142697 | -4336 | 3432 | AN10120 |
| 1548 | CONTIG12 | 146851 | 147215 | 1.56 | 3.33E-02 | transcription_start_site | - | 142493 | 142493 | -4540 | 3433 | AN10120 |
| 465  | CONTIG12 | 132087 | 132426 | 2.49 | 1.22E-03 | transcription_start_site | - | 128213 | 128213 | -4043 | 3436 | AN10121 |
| 465  | CONTIG12 | 132087 | 132426 | 2.49 | 1.22E-03 | transcription_start_site | - | 128036 | 128036 | -4220 | 3437 | AN10121 |

|      |          |        |        |      |          |                          |   |        |        |       |      |         |
|------|----------|--------|--------|------|----------|--------------------------|---|--------|--------|-------|------|---------|
| 465  | CONTIG12 | 132087 | 132426 | 2.49 | 1.22E-03 | transcription_start_site | - | 127903 | 127903 | -4353 | 3438 | AN10121 |
| 465  | CONTIG12 | 132087 | 132426 | 2.49 | 1.22E-03 | transcription_start_site | - | 127785 | 127785 | -4471 | 3439 | AN10121 |
| 1660 | CONTIG13 | 79067  | 79495  | 1.52 | 1.08E-01 | transcription_start_site | - | 78980  | 78980  | -301  | 3448 | AN10124 |
| 1660 | CONTIG13 | 79067  | 79495  | 1.52 | 1.08E-01 | transcription_start_site | - | 78855  | 78855  | -426  | 3449 | AN10124 |
| 1660 | CONTIG13 | 79067  | 79495  | 1.52 | 1.08E-01 | transcription_start_site | - | 78599  | 78599  | -682  | 3450 | AN10124 |
| 1660 | CONTIG13 | 79067  | 79495  | 1.52 | 1.08E-01 | transcription_start_site | - | 78073  | 78073  | -1208 | 3451 | AN10124 |
| 1660 | CONTIG13 | 79067  | 79495  | 1.52 | 1.08E-01 | transcription_start_site | - | 77415  | 77415  | -1866 | 3452 | AN10124 |
| 1457 | CONTIG14 | 34818  | 35302  | 1.61 | 3.70E-02 | transcription_start_site | + | 35477  | 35477  | -417  | 3457 | AN10128 |
| 1457 | CONTIG14 | 34818  | 35302  | 1.61 | 3.70E-02 | transcription_start_site | + | 35678  | 35678  | -618  | 3458 | AN10128 |
| 1457 | CONTIG14 | 34818  | 35302  | 1.61 | 3.70E-02 | transcription_start_site | + | 35797  | 35797  | -737  | 3459 | AN10128 |
| 1457 | CONTIG14 | 34818  | 35302  | 1.61 | 3.70E-02 | transcription_start_site | + | 36371  | 36371  | -1311 | 3460 | AN10128 |
| 1457 | CONTIG14 | 34818  | 35302  | 1.61 | 3.70E-02 | transcription_start_site | + | 36526  | 36526  | -1466 | 3461 | AN10128 |
| 1457 | CONTIG14 | 34818  | 35302  | 1.61 | 3.70E-02 | transcription_start_site | + | 37574  | 37574  | -2514 | 3462 | AN10128 |
| 1457 | CONTIG14 | 34818  | 35302  | 1.61 | 3.70E-02 | transcription_start_site | + | 37730  | 37730  | -2670 | 3463 | AN10128 |
| 1457 | CONTIG14 | 34818  | 35302  | 1.61 | 3.70E-02 | transcription_start_site | + | 38450  | 38450  | -3390 | 3464 | AN10128 |
| 2053 | CONTIG14 | 32402  | 32986  | 1.35 | 7.25E-02 | transcription_start_site | + | 35477  | 35477  | -2783 | 3457 | AN10128 |
| 2053 | CONTIG14 | 32402  | 32986  | 1.35 | 7.25E-02 | transcription_start_site | + | 35678  | 35678  | -2984 | 3458 | AN10128 |
| 2053 | CONTIG14 | 32402  | 32986  | 1.35 | 7.25E-02 | transcription_start_site | + | 35797  | 35797  | -3103 | 3459 | AN10128 |
| 2053 | CONTIG14 | 32402  | 32986  | 1.35 | 7.25E-02 | transcription_start_site | + | 36371  | 36371  | -3677 | 3460 | AN10128 |
| 2053 | CONTIG14 | 32402  | 32986  | 1.35 | 7.25E-02 | transcription_start_site | + | 36526  | 36526  | -3832 | 3461 | AN10128 |
| 2053 | CONTIG14 | 32402  | 32986  | 1.35 | 7.25E-02 | transcription_start_site | + | 37574  | 37574  | -4880 | 3462 | AN10128 |
| 2053 | CONTIG14 | 32402  | 32986  | 1.35 | 7.25E-02 | transcription_start_site | + | 37730  | 37730  | -5036 | 3463 | AN10128 |
| 2325 | CONTIG14 | 241742 | 242151 | 1.26 | 1.07E-01 | transcription_start_site | - | 240159 | 240159 | -1787 | 3465 | AN10129 |
| 2325 | CONTIG14 | 241742 | 242151 | 1.26 | 1.07E-01 | transcription_start_site | - | 240016 | 240016 | -1930 | 3466 | AN10129 |
| 2325 | CONTIG14 | 241742 | 242151 | 1.26 | 1.07E-01 | transcription_start_site | - | 239724 | 239724 | -2222 | 3467 | AN10129 |
| 2903 | CONTIG15 | 62930  | 63294  | 1    | 1.79E-01 | transcription_start_site | + | 62703  | 62703  | 409   | 3470 | AN1013  |
| 2903 | CONTIG15 | 62930  | 63294  | 1    | 1.79E-01 | transcription_start_site | + | 62611  | 62611  | 501   | 3469 | AN1013  |
| 2903 | CONTIG15 | 62930  | 63294  | 1    | 1.79E-01 | transcription_start_site | + | 62443  | 62443  | 669   | 3468 | AN1013  |
| 1457 | CONTIG14 | 34818  | 35302  | 1.61 | 3.70E-02 | transcription_start_site | + | 39892  | 39892  | -4832 | 3481 | AN10133 |
| 2325 | CONTIG14 | 241742 | 242151 | 1.26 | 1.07E-01 | transcription_start_site | - | 238955 | 238955 | -2991 | 3482 | AN10134 |
| 2325 | CONTIG14 | 241742 | 242151 | 1.26 | 1.07E-01 | transcription_start_site | - | 238569 | 238569 | -3377 | 3483 | AN10134 |
| 2325 | CONTIG14 | 241742 | 242151 | 1.26 | 1.07E-01 | transcription_start_site | - | 237604 | 237604 | -4342 | 3484 | AN10135 |
| 2325 | CONTIG14 | 241742 | 242151 | 1.26 | 1.07E-01 | transcription_start_site | - | 237434 | 237434 | -4512 | 3485 | AN10135 |
| 2325 | CONTIG14 | 241742 | 242151 | 1.26 | 1.07E-01 | transcription_start_site | - | 237030 | 237030 | -4916 | 3486 | AN10135 |
| 1355 | CONTIG14 | 245852 | 246206 | 1.66 | 3.08E-02 | transcription_start_site | - | 245397 | 245397 | -632  | 3487 | AN10136 |
| 1355 | CONTIG14 | 245852 | 246206 | 1.66 | 3.08E-02 | transcription_start_site | - | 245076 | 245076 | -953  | 3488 | AN10136 |
| 1355 | CONTIG14 | 245852 | 246206 | 1.66 | 3.08E-02 | transcription_start_site | - | 244285 | 244285 | -1744 | 3489 | AN10136 |
| 1355 | CONTIG14 | 245852 | 246206 | 1.66 | 3.08E-02 | transcription_start_site | - | 244068 | 244068 | -1961 | 3490 | AN10136 |
| 1355 | CONTIG14 | 245852 | 246206 | 1.66 | 3.08E-02 | transcription_start_site | - | 243848 | 243848 | -2181 | 3491 | AN10136 |
| 1355 | CONTIG14 | 245852 | 246206 | 1.66 | 3.08E-02 | transcription_start_site | - | 243634 | 243634 | -2395 | 3492 | AN10136 |
| 2473 | CONTIG15 | 9546   | 9820   | 1.21 | 9.24E-02 | transcription_start_site | + | 14455  | 14455  | -4772 | 3496 | AN10138 |
| 2106 | CONTIG15 | 65195  | 65459  | 1.33 | 5.88E-02 | transcription_start_site | + | 70159  | 70159  | -4832 | 3500 | AN1014  |
| 2106 | CONTIG15 | 65195  | 65459  | 1.33 | 5.88E-02 | transcription_start_site | + | 65805  | 65805  | -478  | 3504 | AN10140 |
| 2106 | CONTIG15 | 65195  | 65459  | 1.33 | 5.88E-02 | transcription_start_site | + | 65981  | 65981  | -654  | 3505 | AN10140 |
| 2106 | CONTIG15 | 65195  | 65459  | 1.33 | 5.88E-02 | transcription_start_site | + | 68850  | 68850  | -3523 | 3506 | AN10140 |
| 2903 | CONTIG15 | 62930  | 63294  | 1    | 1.79E-01 | transcription_start_site | + | 65805  | 65805  | -2693 | 3504 | AN10140 |
| 2903 | CONTIG15 | 62930  | 63294  | 1    | 1.79E-01 | transcription_start_site | + | 65981  | 65981  | -2869 | 3505 | AN10140 |
| 1362 | CONTIG15 | 171379 | 172038 | 1.65 | 7.16E-03 | transcription_start_site | + | 175795 | 175795 | -4086 | 3516 | AN10144 |
| 379  | CONTIG16 | 22068  | 22477  | 2.63 | 0.00E+00 | transcription_start_site | - | 19021  | 19021  | -3251 | 3517 | AN10145 |
| 379  | CONTIG16 | 22068  | 22477  | 2.63 | 0.00E+00 | transcription_start_site | - | 18571  | 18571  | -3701 | 3518 | AN10145 |
| 2090 | CONTIG16 | 226217 | 226486 | 1.34 | 1.44E-01 | transcription_start_site | - | 221453 | 221453 | -4898 | 3521 | AN10147 |
| 466  | CONTIG16 | 307064 | 307493 | 2.48 | 0.00E+00 | transcription_start_site | - | 306697 | 306697 | -581  | 3526 | AN10149 |
| 466  | CONTIG16 | 307064 | 307493 | 2.48 | 0.00E+00 | transcription_start_site | - | 306428 | 306428 | -850  | 3527 | AN10149 |
| 147  | CONTIG15 | 79656  | 80097  | 3.05 | 0.00E+00 | transcription_start_site | - | 75982  | 75982  | -3894 | 3528 | AN1015  |
| 147  | CONTIG15 | 79656  | 80097  | 3.05 | 0.00E+00 | transcription_start_site | - | 75739  | 75739  | -4137 | 3529 | AN1015  |
| 147  | CONTIG15 | 79656  | 80097  | 3.05 | 0.00E+00 | transcription_start_site | - | 75655  | 75655  | -4221 | 3530 | AN1015  |
| 147  | CONTIG15 | 79656  | 80097  | 3.05 | 0.00E+00 | transcription_start_site | - | 75566  | 75566  | -4310 | 3531 | AN1015  |

|      |          |        |        |      |          |                          |   |        |        |       |      |         |
|------|----------|--------|--------|------|----------|--------------------------|---|--------|--------|-------|------|---------|
| 147  | CONTIG15 | 79656  | 80097  | 3.05 | 0.00E+00 | transcription_start_site | - | 75452  | 75452  | -4424 | 3532 | AN1015  |
| 147  | CONTIG15 | 79656  | 80097  | 3.05 | 0.00E+00 | transcription_start_site | - | 75298  | 75298  | -4578 | 3533 | AN1015  |
| 147  | CONTIG15 | 79656  | 80097  | 3.05 | 0.00E+00 | transcription_start_site | - | 75170  | 75170  | -4706 | 3534 | AN1015  |
| 181  | CONTIG16 | 331659 | 332005 | 2.98 | 2.16E-04 | transcription_start_site | + | 331357 | 331357 | 475   | 3539 | AN10150 |
| 181  | CONTIG16 | 331659 | 332005 | 2.98 | 2.16E-04 | transcription_start_site | + | 331150 | 331150 | 682   | 3538 | AN10150 |
| 181  | CONTIG16 | 331659 | 332005 | 2.98 | 2.16E-04 | transcription_start_site | + | 330831 | 330831 | 1001  | 3537 | AN10150 |
| 1605 | CONTIG16 | 414088 | 414368 | 1.54 | 8.01E-02 | transcription_start_site | - | 415141 | 415141 | 913   | 3547 | AN10152 |
| 1605 | CONTIG16 | 414088 | 414368 | 1.54 | 8.01E-02 | transcription_start_site | - | 414165 | 414165 | -63   | 3549 | AN10153 |
| 1605 | CONTIG16 | 414088 | 414368 | 1.54 | 8.01E-02 | transcription_start_site | - | 414526 | 414526 | 298   | 3548 | AN10153 |
| 1605 | CONTIG16 | 414088 | 414368 | 1.54 | 8.01E-02 | transcription_start_site | - | 412560 | 412560 | -1668 | 3550 | AN10153 |
| 1605 | CONTIG16 | 414088 | 414368 | 1.54 | 8.01E-02 | transcription_start_site | - | 410722 | 410722 | -3506 | 3551 | AN10153 |
| 466  | CONTIG16 | 307064 | 307493 | 2.48 | 0.00E+00 | transcription_start_site | - | 304949 | 304949 | -2329 | 3554 | AN10155 |
| 466  | CONTIG16 | 307064 | 307493 | 2.48 | 0.00E+00 | transcription_start_site | - | 304463 | 304463 | -2815 | 3555 | AN10155 |
| 466  | CONTIG16 | 307064 | 307493 | 2.48 | 0.00E+00 | transcription_start_site | - | 303766 | 303766 | -3512 | 3556 | AN10155 |
| 864  | CONTIG16 | 288844 | 289108 | 2.04 | 1.57E-02 | transcription_start_site | - | 288286 | 288286 | -690  | 3557 | AN10156 |
| 864  | CONTIG16 | 288844 | 289108 | 2.04 | 1.57E-02 | transcription_start_site | - | 288066 | 288066 | -910  | 3558 | AN10156 |
| 864  | CONTIG16 | 288844 | 289108 | 2.04 | 1.57E-02 | transcription_start_site | - | 287883 | 287883 | -1093 | 3559 | AN10156 |
| 864  | CONTIG16 | 288844 | 289108 | 2.04 | 1.57E-02 | transcription_start_site | - | 287374 | 287374 | -1602 | 3560 | AN10156 |
| 864  | CONTIG16 | 288844 | 289108 | 2.04 | 1.57E-02 | transcription_start_site | - | 286989 | 286989 | -1987 | 3561 | AN10156 |
| 1494 | CONTIG16 | 144616 | 144885 | 1.59 | 6.84E-02 | transcription_start_site | + | 145762 | 145762 | -1011 | 3562 | AN10157 |
| 1834 | CONTIG16 | 66685  | 67264  | 1.44 | 9.26E-02 | transcription_start_site | - | 64659  | 64659  | -2315 | 3565 | AN10159 |
| 1834 | CONTIG16 | 66685  | 67264  | 1.44 | 9.26E-02 | transcription_start_site | - | 64584  | 64584  | -2390 | 3566 | AN10159 |
| 1834 | CONTIG16 | 66685  | 67264  | 1.44 | 9.26E-02 | transcription_start_site | - | 64475  | 64475  | -2499 | 3567 | AN10159 |
| 1834 | CONTIG16 | 66685  | 67264  | 1.44 | 9.26E-02 | transcription_start_site | - | 64345  | 64345  | -2629 | 3568 | AN10159 |
| 147  | CONTIG15 | 79656  | 80097  | 3.05 | 0.00E+00 | transcription_start_site | - | 78761  | 78761  | -1115 | 3569 | AN1016  |
| 147  | CONTIG15 | 79656  | 80097  | 3.05 | 0.00E+00 | transcription_start_site | - | 78546  | 78546  | -1330 | 3570 | AN1016  |
| 147  | CONTIG15 | 79656  | 80097  | 3.05 | 0.00E+00 | transcription_start_site | - | 78149  | 78149  | -1727 | 3571 | AN1016  |
| 147  | CONTIG15 | 79656  | 80097  | 3.05 | 0.00E+00 | transcription_start_site | - | 77967  | 77967  | -1909 | 3572 | AN1016  |
| 147  | CONTIG15 | 79656  | 80097  | 3.05 | 0.00E+00 | transcription_start_site | - | 77788  | 77788  | -2088 | 3573 | AN1016  |
| 147  | CONTIG15 | 79656  | 80097  | 3.05 | 0.00E+00 | transcription_start_site | - | 77490  | 77490  | -2386 | 3574 | AN1016  |
| 1304 | CONTIG15 | 82201  | 82700  | 1.69 | 1.30E-02 | transcription_start_site | - | 78761  | 78761  | -3689 | 3569 | AN1016  |
| 1304 | CONTIG15 | 82201  | 82700  | 1.69 | 1.30E-02 | transcription_start_site | - | 78546  | 78546  | -3904 | 3570 | AN1016  |
| 1304 | CONTIG15 | 82201  | 82700  | 1.69 | 1.30E-02 | transcription_start_site | - | 78149  | 78149  | -4301 | 3571 | AN1016  |
| 1304 | CONTIG15 | 82201  | 82700  | 1.69 | 1.30E-02 | transcription_start_site | - | 77967  | 77967  | -4483 | 3572 | AN1016  |
| 1304 | CONTIG15 | 82201  | 82700  | 1.69 | 1.30E-02 | transcription_start_site | - | 77788  | 77788  | -4662 | 3573 | AN1016  |
| 1304 | CONTIG15 | 82201  | 82700  | 1.69 | 1.30E-02 | transcription_start_site | - | 77490  | 77490  | -4960 | 3574 | AN1016  |
| 32   | CONTIG16 | 24243  | 24657  | 3.53 | 0.00E+00 | transcription_start_site | - | 20149  | 20149  | -4301 | 3575 | AN10160 |
| 379  | CONTIG16 | 22068  | 22477  | 2.63 | 0.00E+00 | transcription_start_site | - | 20149  | 20149  | -2123 | 3575 | AN10160 |
| 1094 | CONTIG16 | 122268 | 122614 | 1.84 | 3.08E-02 | transcription_start_site | - | 117400 | 117400 | -5041 | 3579 | AN10162 |
| 380  | CONTIG16 | 139521 | 139942 | 2.63 | 0.00E+00 | transcription_start_site | + | 143150 | 143150 | -3418 | 3582 | AN10164 |
| 380  | CONTIG16 | 139521 | 139942 | 2.63 | 0.00E+00 | transcription_start_site | + | 143600 | 143600 | -3868 | 3583 | AN10164 |
| 380  | CONTIG16 | 139521 | 139942 | 2.63 | 0.00E+00 | transcription_start_site | + | 143760 | 143760 | -4028 | 3584 | AN10164 |
| 380  | CONTIG16 | 139521 | 139942 | 2.63 | 0.00E+00 | transcription_start_site | + | 144459 | 144459 | -4727 | 3585 | AN10164 |
| 380  | CONTIG16 | 139521 | 139942 | 2.63 | 0.00E+00 | transcription_start_site | + | 144659 | 144659 | -4927 | 3586 | AN10164 |
| 1494 | CONTIG16 | 144616 | 144885 | 1.59 | 6.84E-02 | transcription_start_site | + | 144659 | 144659 | 91    | 3586 | AN10164 |
| 1494 | CONTIG16 | 144616 | 144885 | 1.59 | 6.84E-02 | transcription_start_site | + | 144459 | 144459 | 291   | 3585 | AN10164 |
| 1494 | CONTIG16 | 144616 | 144885 | 1.59 | 6.84E-02 | transcription_start_site | + | 143760 | 143760 | 990   | 3584 | AN10164 |
| 2588 | CONTIG17 | 231078 | 231530 | 1.17 | 1.50E-01 | transcription_start_site | + | 230476 | 230476 | 828   | 3599 | AN10169 |
| 2588 | CONTIG17 | 231078 | 231530 | 1.17 | 1.50E-01 | transcription_start_site | + | 230371 | 230371 | 933   | 3598 | AN10169 |
| 147  | CONTIG15 | 79656  | 80097  | 3.05 | 0.00E+00 | transcription_start_site | + | 82917  | 82917  | -3040 | 3600 | AN1017  |
| 147  | CONTIG15 | 79656  | 80097  | 3.05 | 0.00E+00 | transcription_start_site | + | 83034  | 83034  | -3157 | 3601 | AN1017  |
| 147  | CONTIG15 | 79656  | 80097  | 3.05 | 0.00E+00 | transcription_start_site | + | 83194  | 83194  | -3317 | 3602 | AN1017  |
| 147  | CONTIG15 | 79656  | 80097  | 3.05 | 0.00E+00 | transcription_start_site | + | 83386  | 83386  | -3509 | 3603 | AN1017  |
| 147  | CONTIG15 | 79656  | 80097  | 3.05 | 0.00E+00 | transcription_start_site | + | 83494  | 83494  | -3617 | 3604 | AN1017  |
| 147  | CONTIG15 | 79656  | 80097  | 3.05 | 0.00E+00 | transcription_start_site | + | 83647  | 83647  | -3770 | 3605 | AN1017  |
| 147  | CONTIG15 | 79656  | 80097  | 3.05 | 0.00E+00 | transcription_start_site | + | 84070  | 84070  | -4193 | 3606 | AN1017  |
| 147  | CONTIG15 | 79656  | 80097  | 3.05 | 0.00E+00 | transcription_start_site | + | 84249  | 84249  | -4372 | 3607 | AN1017  |

|      |          |        |        |      |          |                          |   |        |        |       |      |         |
|------|----------|--------|--------|------|----------|--------------------------|---|--------|--------|-------|------|---------|
| 147  | CONTIG15 | 79656  | 80097  | 3.05 | 0.00E+00 | transcription_start_site | + | 84492  | 84492  | -4615 | 3608 | AN1017  |
| 1304 | CONTIG15 | 82201  | 82700  | 1.69 | 1.30E-02 | transcription_start_site | + | 82917  | 82917  | -466  | 3600 | AN1017  |
| 1304 | CONTIG15 | 82201  | 82700  | 1.69 | 1.30E-02 | transcription_start_site | + | 83034  | 83034  | -583  | 3601 | AN1017  |
| 1304 | CONTIG15 | 82201  | 82700  | 1.69 | 1.30E-02 | transcription_start_site | + | 83194  | 83194  | -743  | 3602 | AN1017  |
| 1304 | CONTIG15 | 82201  | 82700  | 1.69 | 1.30E-02 | transcription_start_site | + | 83386  | 83386  | -935  | 3603 | AN1017  |
| 1304 | CONTIG15 | 82201  | 82700  | 1.69 | 1.30E-02 | transcription_start_site | + | 83494  | 83494  | -1043 | 3604 | AN1017  |
| 1304 | CONTIG15 | 82201  | 82700  | 1.69 | 1.30E-02 | transcription_start_site | + | 83647  | 83647  | -1196 | 3605 | AN1017  |
| 1304 | CONTIG15 | 82201  | 82700  | 1.69 | 1.30E-02 | transcription_start_site | + | 84070  | 84070  | -1619 | 3606 | AN1017  |
| 1304 | CONTIG15 | 82201  | 82700  | 1.69 | 1.30E-02 | transcription_start_site | + | 84249  | 84249  | -1798 | 3607 | AN1017  |
| 1304 | CONTIG15 | 82201  | 82700  | 1.69 | 1.30E-02 | transcription_start_site | + | 84492  | 84492  | -2041 | 3608 | AN1017  |
| 2326 | CONTIG17 | 309314 | 309888 | 1.26 | 1.07E-01 | transcription_start_site | - | 309405 | 309405 | -196  | 3612 | AN10171 |
| 2326 | CONTIG17 | 309314 | 309888 | 1.26 | 1.07E-01 | transcription_start_site | - | 308287 | 308287 | -1314 | 3613 | AN10171 |
| 1621 | CONTIG17 | 337358 | 337715 | 1.53 | 5.22E-02 | transcription_start_site | - | 337378 | 337378 | -158  | 3614 | AN10172 |
| 1621 | CONTIG17 | 337358 | 337715 | 1.53 | 5.22E-02 | transcription_start_site | - | 337241 | 337241 | -295  | 3615 | AN10172 |
| 1621 | CONTIG17 | 337358 | 337715 | 1.53 | 5.22E-02 | transcription_start_site | - | 337144 | 337144 | -392  | 3616 | AN10172 |
| 1621 | CONTIG17 | 337358 | 337715 | 1.53 | 5.22E-02 | transcription_start_site | - | 337053 | 337053 | -483  | 3617 | AN10172 |
| 1621 | CONTIG17 | 337358 | 337715 | 1.53 | 5.22E-02 | transcription_start_site | - | 336876 | 336876 | -660  | 3618 | AN10172 |
| 2588 | CONTIG17 | 231078 | 231530 | 1.17 | 1.50E-01 | transcription_start_site | + | 231581 | 231581 | -277  | 3621 | AN10174 |
| 2588 | CONTIG17 | 231078 | 231530 | 1.17 | 1.50E-01 | transcription_start_site | + | 231925 | 231925 | -621  | 3622 | AN10174 |
| 1829 | CONTIG17 | 306319 | 306901 | 1.44 | 6.84E-02 | transcription_start_site | - | 306514 | 306514 | -96   | 3625 | AN10176 |
| 1829 | CONTIG17 | 306319 | 306901 | 1.44 | 6.84E-02 | transcription_start_site | - | 306375 | 306375 | -235  | 3626 | AN10176 |
| 2326 | CONTIG17 | 309314 | 309888 | 1.26 | 1.07E-01 | transcription_start_site | - | 306514 | 306514 | -3087 | 3625 | AN10176 |
| 2326 | CONTIG17 | 309314 | 309888 | 1.26 | 1.07E-01 | transcription_start_site | - | 306375 | 306375 | -3226 | 3626 | AN10176 |
| 752  | CONTIG17 | 318916 | 319190 | 2.15 | 4.61E-03 | transcription_start_site | - | 314234 | 314234 | -4819 | 3628 | AN10178 |
| 752  | CONTIG17 | 318916 | 319190 | 2.15 | 4.61E-03 | transcription_start_site | - | 314081 | 314081 | -4972 | 3629 | AN10178 |
| 1621 | CONTIG17 | 337358 | 337715 | 1.53 | 5.22E-02 | transcription_start_site | - | 338357 | 338357 | 820   | 3633 | AN10179 |
| 1304 | CONTIG15 | 82201  | 82700  | 1.69 | 1.30E-02 | transcription_start_site | + | 85232  | 85232  | -2781 | 3634 | AN1018  |
| 1304 | CONTIG15 | 82201  | 82700  | 1.69 | 1.30E-02 | transcription_start_site | + | 85487  | 85487  | -3036 | 3635 | AN1018  |
| 1304 | CONTIG15 | 82201  | 82700  | 1.69 | 1.30E-02 | transcription_start_site | + | 85653  | 85653  | -3202 | 3636 | AN1018  |
| 1304 | CONTIG15 | 82201  | 82700  | 1.69 | 1.30E-02 | transcription_start_site | + | 86024  | 86024  | -3573 | 3637 | AN1018  |
| 1304 | CONTIG15 | 82201  | 82700  | 1.69 | 1.30E-02 | transcription_start_site | + | 86107  | 86107  | -3656 | 3638 | AN1018  |
| 1304 | CONTIG15 | 82201  | 82700  | 1.69 | 1.30E-02 | transcription_start_site | + | 86223  | 86223  | -3772 | 3639 | AN1018  |
| 1304 | CONTIG15 | 82201  | 82700  | 1.69 | 1.30E-02 | transcription_start_site | + | 86360  | 86360  | -3909 | 3640 | AN1018  |
| 1304 | CONTIG15 | 82201  | 82700  | 1.69 | 1.30E-02 | transcription_start_site | + | 86586  | 86586  | -4135 | 3641 | AN1018  |
| 1304 | CONTIG15 | 82201  | 82700  | 1.69 | 1.30E-02 | transcription_start_site | + | 86681  | 86681  | -4230 | 3642 | AN1018  |
| 1304 | CONTIG15 | 82201  | 82700  | 1.69 | 1.30E-02 | transcription_start_site | + | 86874  | 86874  | -4423 | 3643 | AN1018  |
| 222  | CONTIG18 | 99388  | 99892  | 2.89 | 0.00E+00 | transcription_start_site | - | 98436  | 98436  | -1204 | 3648 | AN10181 |
| 222  | CONTIG18 | 99388  | 99892  | 2.89 | 0.00E+00 | transcription_start_site | - | 95902  | 95902  | -3738 | 3652 | AN10183 |
| 222  | CONTIG18 | 99388  | 99892  | 2.89 | 0.00E+00 | transcription_start_site | - | 95434  | 95434  | -4206 | 3653 | AN10183 |
| 3039 | CONTIG19 | 29484  | 29762  | 0.8  | 1.25E-01 | transcription_start_site | + | 31617  | 31617  | -1994 | 3654 | AN10184 |
| 3039 | CONTIG19 | 29484  | 29762  | 0.8  | 1.25E-01 | transcription_start_site | + | 31864  | 31864  | -2241 | 3655 | AN10184 |
| 3039 | CONTIG19 | 29484  | 29762  | 0.8  | 1.25E-01 | transcription_start_site | + | 32288  | 32288  | -2665 | 3656 | AN10184 |
| 1391 | CONTIG19 | 60241  | 60515  | 1.63 | 8.69E-04 | transcription_start_site | - | 60083  | 60083  | -295  | 3660 | AN10186 |
| 1391 | CONTIG19 | 60241  | 60515  | 1.63 | 8.69E-04 | transcription_start_site | - | 59996  | 59996  | -382  | 3661 | AN10186 |
| 1391 | CONTIG19 | 60241  | 60515  | 1.63 | 8.69E-04 | transcription_start_site | - | 59847  | 59847  | -531  | 3662 | AN10186 |
| 1391 | CONTIG19 | 60241  | 60515  | 1.63 | 8.69E-04 | transcription_start_site | - | 59409  | 59409  | -969  | 3663 | AN10186 |
| 1391 | CONTIG19 | 60241  | 60515  | 1.63 | 8.69E-04 | transcription_start_site | - | 58928  | 58928  | -1450 | 3664 | AN10186 |
| 1391 | CONTIG19 | 60241  | 60515  | 1.63 | 8.69E-04 | transcription_start_site | - | 58579  | 58579  | -1799 | 3665 | AN10186 |
| 1391 | CONTIG19 | 60241  | 60515  | 1.63 | 8.69E-04 | transcription_start_site | - | 58425  | 58425  | -1953 | 3666 | AN10186 |
| 2651 | CONTIG19 | 61516  | 61939  | 1.14 | 1.84E-02 | transcription_start_site | - | 60083  | 60083  | -1644 | 3660 | AN10186 |
| 2651 | CONTIG19 | 61516  | 61939  | 1.14 | 1.84E-02 | transcription_start_site | - | 59996  | 59996  | -1731 | 3661 | AN10186 |
| 2651 | CONTIG19 | 61516  | 61939  | 1.14 | 1.84E-02 | transcription_start_site | - | 59847  | 59847  | -1880 | 3662 | AN10186 |
| 2651 | CONTIG19 | 61516  | 61939  | 1.14 | 1.84E-02 | transcription_start_site | - | 59409  | 59409  | -2318 | 3663 | AN10186 |
| 2651 | CONTIG19 | 61516  | 61939  | 1.14 | 1.84E-02 | transcription_start_site | - | 58928  | 58928  | -2799 | 3664 | AN10186 |
| 2651 | CONTIG19 | 61516  | 61939  | 1.14 | 1.84E-02 | transcription_start_site | - | 58579  | 58579  | -3148 | 3665 | AN10186 |
| 2651 | CONTIG19 | 61516  | 61939  | 1.14 | 1.84E-02 | transcription_start_site | - | 58425  | 58425  | -3302 | 3666 | AN10186 |
| 1391 | CONTIG19 | 60241  | 60515  | 1.63 | 8.69E-04 | transcription_start_site | - | 57982  | 57982  | -2396 | 3669 | AN10188 |

|      |          |        |        |      |          |                          |   |        |        |       |      |         |
|------|----------|--------|--------|------|----------|--------------------------|---|--------|--------|-------|------|---------|
| 1391 | CONTIG19 | 60241  | 60515  | 1.63 | 8.69E-04 | transcription_start_site | - | 57811  | 57811  | -2567 | 3670 | AN10188 |
| 1391 | CONTIG19 | 60241  | 60515  | 1.63 | 8.69E-04 | transcription_start_site | - | 57631  | 57631  | -2747 | 3671 | AN10188 |
| 1391 | CONTIG19 | 60241  | 60515  | 1.63 | 8.69E-04 | transcription_start_site | - | 57343  | 57343  | -3035 | 3672 | AN10188 |
| 2651 | CONTIG19 | 61516  | 61939  | 1.14 | 1.84E-02 | transcription_start_site | - | 57982  | 57982  | -3745 | 3669 | AN10188 |
| 2651 | CONTIG19 | 61516  | 61939  | 1.14 | 1.84E-02 | transcription_start_site | - | 57811  | 57811  | -3916 | 3670 | AN10188 |
| 2651 | CONTIG19 | 61516  | 61939  | 1.14 | 1.84E-02 | transcription_start_site | - | 57631  | 57631  | -4096 | 3671 | AN10188 |
| 2651 | CONTIG19 | 61516  | 61939  | 1.14 | 1.84E-02 | transcription_start_site | - | 57343  | 57343  | -4384 | 3672 | AN10188 |
| 3039 | CONTIG19 | 29484  | 29762  | 0.8  | 1.25E-01 | transcription_start_site | + | 30240  | 30240  | -617  | 3673 | AN10189 |
| 3039 | CONTIG19 | 29484  | 29762  | 0.8  | 1.25E-01 | transcription_start_site | + | 30693  | 30693  | -1070 | 3674 | AN10189 |
| 3039 | CONTIG19 | 29484  | 29762  | 0.8  | 1.25E-01 | transcription_start_site | + | 30864  | 30864  | -1241 | 3675 | AN10189 |
| 3039 | CONTIG19 | 29484  | 29762  | 0.8  | 1.25E-01 | transcription_start_site | + | 31038  | 31038  | -1415 | 3676 | AN10189 |
| 2216 | CONTIG15 | 94727  | 95226  | 1.29 | 6.84E-02 | transcription_start_site | - | 91674  | 91674  | -3302 | 3677 | AN1019  |
| 2216 | CONTIG15 | 94727  | 95226  | 1.29 | 6.84E-02 | transcription_start_site | - | 91543  | 91543  | -3433 | 3678 | AN1019  |
| 2216 | CONTIG15 | 94727  | 95226  | 1.29 | 6.84E-02 | transcription_start_site | - | 91401  | 91401  | -3575 | 3679 | AN1019  |
| 2216 | CONTIG15 | 94727  | 95226  | 1.29 | 6.84E-02 | transcription_start_site | - | 91319  | 91319  | -3657 | 3680 | AN1019  |
| 2216 | CONTIG15 | 94727  | 95226  | 1.29 | 6.84E-02 | transcription_start_site | - | 91171  | 91171  | -3805 | 3681 | AN1019  |
| 2451 | CONTIG22 | 103284 | 103568 | 1.22 | 1.93E-01 | transcription_start_site | + | 104342 | 104342 | -916  | 3684 | AN10191 |
| 2451 | CONTIG22 | 103284 | 103568 | 1.22 | 1.93E-01 | transcription_start_site | + | 106423 | 106423 | -2997 | 3685 | AN10191 |
| 316  | CONTIG22 | 183468 | 183805 | 2.74 | 9.51E-04 | transcription_start_site | - | 181212 | 181212 | -2424 | 3686 | AN10192 |
| 1532 | CONTIG22 | 212483 | 213502 | 1.57 | 6.84E-02 | transcription_start_site | + | 214174 | 214174 | -1181 | 3687 | AN10193 |
| 1532 | CONTIG22 | 212483 | 213502 | 1.57 | 6.84E-02 | transcription_start_site | + | 214347 | 214347 | -1354 | 3688 | AN10193 |
| 1532 | CONTIG22 | 212483 | 213502 | 1.57 | 6.84E-02 | transcription_start_site | + | 215003 | 215003 | -2010 | 3689 | AN10193 |
| 316  | CONTIG22 | 183468 | 183805 | 2.74 | 9.51E-04 | transcription_start_site | - | 182890 | 182890 | -746  | 3698 | AN10197 |
| 316  | CONTIG22 | 183468 | 183805 | 2.74 | 9.51E-04 | transcription_start_site | - | 182583 | 182583 | -1053 | 3699 | AN10197 |
| 316  | CONTIG22 | 183468 | 183805 | 2.74 | 9.51E-04 | transcription_start_site | - | 182491 | 182491 | -1145 | 3700 | AN10197 |
| 316  | CONTIG22 | 183468 | 183805 | 2.74 | 9.51E-04 | transcription_start_site | - | 182321 | 182321 | -1315 | 3701 | AN10197 |
| 1886 | CONTIG22 | 108529 | 108878 | 1.42 | 1.08E-01 | transcription_start_site | + | 109613 | 109613 | -909  | 3715 | AN10204 |
| 1886 | CONTIG22 | 108529 | 108878 | 1.42 | 1.08E-01 | transcription_start_site | + | 110029 | 110029 | -1325 | 3716 | AN10204 |
| 1532 | CONTIG22 | 212483 | 213502 | 1.57 | 6.84E-02 | transcription_start_site | + | 216071 | 216071 | -3078 | 3720 | AN10207 |
| 1532 | CONTIG22 | 212483 | 213502 | 1.57 | 6.84E-02 | transcription_start_site | + | 216325 | 216325 | -3332 | 3721 | AN10207 |
| 1532 | CONTIG22 | 212483 | 213502 | 1.57 | 6.84E-02 | transcription_start_site | + | 216585 | 216585 | -3592 | 3722 | AN10207 |
| 1532 | CONTIG22 | 212483 | 213502 | 1.57 | 6.84E-02 | transcription_start_site | + | 216794 | 216794 | -3801 | 3723 | AN10207 |
| 1532 | CONTIG22 | 212483 | 213502 | 1.57 | 6.84E-02 | transcription_start_site | + | 217277 | 217277 | -4284 | 3724 | AN10207 |
| 1532 | CONTIG22 | 212483 | 213502 | 1.57 | 6.84E-02 | transcription_start_site | + | 217430 | 217430 | -4437 | 3725 | AN10207 |
| 1532 | CONTIG22 | 212483 | 213502 | 1.57 | 6.84E-02 | transcription_start_site | + | 217538 | 217538 | -4545 | 3726 | AN10207 |
| 2300 | CONTIG22 | 217808 | 218087 | 1.27 | 1.66E-01 | transcription_start_site | + | 217538 | 217538 | 409   | 3726 | AN10207 |
| 2300 | CONTIG22 | 217808 | 218087 | 1.27 | 1.66E-01 | transcription_start_site | + | 217430 | 217430 | 517   | 3725 | AN10207 |
| 2300 | CONTIG22 | 217808 | 218087 | 1.27 | 1.66E-01 | transcription_start_site | + | 217277 | 217277 | 670   | 3724 | AN10207 |
| 1471 | CONTIG23 | 5251   | 5525   | 1.61 | 8.01E-02 | transcription_start_site | + | 8579   | 8579   | -3191 | 3731 | AN10209 |
| 1471 | CONTIG23 | 5251   | 5525   | 1.61 | 8.01E-02 | transcription_start_site | + | 8726   | 8726   | -3338 | 3732 | AN10209 |
| 1471 | CONTIG23 | 5251   | 5525   | 1.61 | 8.01E-02 | transcription_start_site | + | 8937   | 8937   | -3549 | 3733 | AN10209 |
| 1471 | CONTIG23 | 5251   | 5525   | 1.61 | 8.01E-02 | transcription_start_site | + | 9347   | 9347   | -3959 | 3734 | AN10209 |
| 1471 | CONTIG23 | 5251   | 5525   | 1.61 | 8.01E-02 | transcription_start_site | + | 9690   | 9690   | -4302 | 3735 | AN10209 |
| 2216 | CONTIG15 | 94727  | 95226  | 1.29 | 6.84E-02 | transcription_start_site | - | 94823  | 94823  | -153  | 3737 | AN1021  |
| 2216 | CONTIG15 | 94727  | 95226  | 1.29 | 6.84E-02 | transcription_start_site | - | 94481  | 94481  | -495  | 3738 | AN1021  |
| 1471 | CONTIG23 | 5251   | 5525   | 1.61 | 8.01E-02 | transcription_start_site | + | 7084   | 7084   | -1696 | 3746 | AN10211 |
| 1471 | CONTIG23 | 5251   | 5525   | 1.61 | 8.01E-02 | transcription_start_site | + | 7231   | 7231   | -1843 | 3747 | AN10211 |
| 2607 | CONTIG25 | 86495  | 86979  | 1.16 | 9.24E-02 | transcription_start_site | + | 86077  | 86077  | 660   | 3761 | AN10219 |
| 2607 | CONTIG25 | 86495  | 86979  | 1.16 | 9.24E-02 | transcription_start_site | + | 85586  | 85586  | 1151  | 3760 | AN10219 |
| 2894 | CONTIG25 | 85205  | 85494  | 1.01 | 1.66E-01 | transcription_start_site | + | 85586  | 85586  | -236  | 3760 | AN10219 |
| 2894 | CONTIG25 | 85205  | 85494  | 1.01 | 1.66E-01 | transcription_start_site | + | 86077  | 86077  | -727  | 3761 | AN10219 |
| 2216 | CONTIG15 | 94727  | 95226  | 1.29 | 6.84E-02 | transcription_start_site | + | 95400  | 95400  | -423  | 3762 | AN1022  |
| 2216 | CONTIG15 | 94727  | 95226  | 1.29 | 6.84E-02 | transcription_start_site | + | 95911  | 95911  | -934  | 3763 | AN1022  |
| 2216 | CONTIG15 | 94727  | 95226  | 1.29 | 6.84E-02 | transcription_start_site | + | 96020  | 96020  | -1043 | 3764 | AN1022  |
| 806  | CONTIG26 | 99535  | 100044 | 2.1  | 1.11E-02 | transcription_start_site | + | 100033 | 100033 | -243  | 3765 | AN10220 |
| 806  | CONTIG26 | 99535  | 100044 | 2.1  | 1.11E-02 | transcription_start_site | + | 100433 | 100433 | -643  | 3766 | AN10220 |
| 2145 | CONTIG26 | 95629  | 95978  | 1.32 | 1.44E-01 | transcription_start_site | + | 100033 | 100033 | -4229 | 3765 | AN10220 |

|      |          |        |        |      |          |                          |   |        |        |       |      |         |
|------|----------|--------|--------|------|----------|--------------------------|---|--------|--------|-------|------|---------|
| 2145 | CONTIG26 | 95629  | 95978  | 1.32 | 1.44E-01 | transcription_start_site | + | 100433 | 100433 | -4629 | 3766 | AN10220 |
| 1888 | CONTIG26 | 193519 | 193868 | 1.42 | 1.08E-01 | transcription_start_site | - | 194231 | 194231 | 537   | 3768 | AN10221 |
| 1783 | CONTIG26 | 317117 | 317391 | 1.47 | 9.24E-02 | transcription_start_site | + | 316138 | 316138 | 1116  | 3776 | AN10223 |
| 806  | CONTIG26 | 99535  | 100044 | 2.1  | 1.11E-02 | transcription_start_site | + | 101736 | 101736 | -1946 | 3777 | AN10224 |
| 1783 | CONTIG26 | 317117 | 317391 | 1.47 | 9.24E-02 | transcription_start_site | + | 317984 | 317984 | -730  | 3782 | AN10227 |
| 2216 | CONTIG15 | 94727  | 95226  | 1.29 | 6.84E-02 | transcription_start_site | + | 96718  | 96718  | -1741 | 3791 | AN1023  |
| 2216 | CONTIG15 | 94727  | 95226  | 1.29 | 6.84E-02 | transcription_start_site | + | 97032  | 97032  | -2055 | 3792 | AN1023  |
| 2216 | CONTIG15 | 94727  | 95226  | 1.29 | 6.84E-02 | transcription_start_site | + | 97331  | 97331  | -2354 | 3793 | AN1023  |
| 2318 | CONTIG27 | 40587  | 40944  | 1.26 | 6.84E-02 | transcription_start_site | + | 42956  | 42956  | -2190 | 3794 | AN10230 |
| 2318 | CONTIG27 | 40587  | 40944  | 1.26 | 6.84E-02 | transcription_start_site | + | 43112  | 43112  | -2346 | 3795 | AN10230 |
| 2318 | CONTIG27 | 40587  | 40944  | 1.26 | 6.84E-02 | transcription_start_site | + | 43668  | 43668  | -2902 | 3796 | AN10230 |
| 2432 | CONTIG27 | 42842  | 44089  | 1.22 | 5.52E-02 | transcription_start_site | + | 43668  | 43668  | -202  | 3796 | AN10230 |
| 2432 | CONTIG27 | 42842  | 44089  | 1.22 | 5.52E-02 | transcription_start_site | + | 43112  | 43112  | 353   | 3795 | AN10230 |
| 2432 | CONTIG27 | 42842  | 44089  | 1.22 | 5.52E-02 | transcription_start_site | + | 42956  | 42956  | 509   | 3794 | AN10230 |
| 2926 | CONTIG27 | 38787  | 39436  | 0.99 | 1.93E-01 | transcription_start_site | + | 42956  | 42956  | -3844 | 3794 | AN10230 |
| 2926 | CONTIG27 | 38787  | 39436  | 0.99 | 1.93E-01 | transcription_start_site | + | 43112  | 43112  | -4000 | 3795 | AN10230 |
| 2926 | CONTIG27 | 38787  | 39436  | 0.99 | 1.93E-01 | transcription_start_site | + | 43668  | 43668  | -4556 | 3796 | AN10230 |
| 2318 | CONTIG27 | 40587  | 40944  | 1.26 | 6.84E-02 | transcription_start_site | + | 41069  | 41069  | -303  | 3800 | AN10233 |
| 2924 | CONTIG27 | 37141  | 37491  | 0.99 | 1.79E-01 | transcription_start_site | + | 41069  | 41069  | -3753 | 3800 | AN10233 |
| 2926 | CONTIG27 | 38787  | 39436  | 0.99 | 1.93E-01 | transcription_start_site | + | 41069  | 41069  | -1957 | 3800 | AN10233 |
| 767  | CONTIG29 | 106140 | 106404 | 2.13 | 1.11E-02 | transcription_start_site | + | 106374 | 106374 | -102  | 3801 | AN10234 |
| 767  | CONTIG29 | 106140 | 106404 | 2.13 | 1.11E-02 | transcription_start_site | + | 107166 | 107166 | -894  | 3802 | AN10234 |
| 1240 | CONTIG29 | 107118 | 107452 | 1.74 | 4.36E-02 | transcription_start_site | + | 107166 | 107166 | 119   | 3802 | AN10234 |
| 1240 | CONTIG29 | 107118 | 107452 | 1.74 | 4.36E-02 | transcription_start_site | + | 106374 | 106374 | 911   | 3801 | AN10234 |
| 2092 | CONTIG29 | 101101 | 101470 | 1.34 | 1.44E-01 | transcription_start_site | + | 106374 | 106374 | -5088 | 3801 | AN10234 |
| 2236 | CONTIG29 | 101791 | 102290 | 1.29 | 1.50E-01 | transcription_start_site | + | 106374 | 106374 | -4333 | 3801 | AN10234 |
| 2236 | CONTIG29 | 101791 | 102290 | 1.29 | 1.50E-01 | transcription_start_site | + | 107166 | 107166 | -5125 | 3802 | AN10234 |
| 2242 | CONTIG29 | 104865 | 105744 | 1.29 | 1.66E-01 | transcription_start_site | + | 106374 | 106374 | -1069 | 3801 | AN10234 |
| 2242 | CONTIG29 | 104865 | 105744 | 1.29 | 1.66E-01 | transcription_start_site | + | 107166 | 107166 | -1861 | 3802 | AN10234 |
| 767  | CONTIG29 | 106140 | 106404 | 2.13 | 1.11E-02 | transcription_start_site | + | 107828 | 107828 | -1556 | 3810 | AN10238 |
| 767  | CONTIG29 | 106140 | 106404 | 2.13 | 1.11E-02 | transcription_start_site | + | 108063 | 108063 | -1791 | 3811 | AN10238 |
| 1240 | CONTIG29 | 107118 | 107452 | 1.74 | 4.36E-02 | transcription_start_site | + | 107828 | 107828 | -543  | 3810 | AN10238 |
| 1240 | CONTIG29 | 107118 | 107452 | 1.74 | 4.36E-02 | transcription_start_site | + | 108063 | 108063 | -778  | 3811 | AN10238 |
| 2242 | CONTIG29 | 104865 | 105744 | 1.29 | 1.66E-01 | transcription_start_site | + | 107828 | 107828 | -2523 | 3810 | AN10238 |
| 2242 | CONTIG29 | 104865 | 105744 | 1.29 | 1.66E-01 | transcription_start_site | + | 108063 | 108063 | -2758 | 3811 | AN10238 |
| 2582 | CONTIG15 | 105302 | 105656 | 1.17 | 1.08E-01 | transcription_start_site | - | 101200 | 101200 | -4279 | 3815 | AN1024  |
| 2582 | CONTIG15 | 105302 | 105656 | 1.17 | 1.08E-01 | transcription_start_site | - | 100973 | 100973 | -4506 | 3816 | AN1024  |
| 1600 | CONTIG29 | 52509  | 53753  | 1.54 | 5.52E-02 | transcription_start_site | - | 51155  | 51155  | -1976 | 3822 | AN10242 |
| 1600 | CONTIG29 | 52509  | 53753  | 1.54 | 5.52E-02 | transcription_start_site | - | 50721  | 50721  | -2410 | 3823 | AN10242 |
| 507  | CONTIG29 | 276226 | 276595 | 2.43 | 4.46E-04 | transcription_start_site | + | 275269 | 275269 | 1141  | 3829 | AN10245 |
| 87   | CONTIG29 | 279311 | 279741 | 3.27 | 0.00E+00 | transcription_start_site | + | 283987 | 283987 | -4461 | 3830 | AN10246 |
| 160  | CONTIG29 | 282976 | 283269 | 3.03 | 2.39E-04 | transcription_start_site | + | 283987 | 283987 | -864  | 3830 | AN10246 |
| 1734 | CONTIG29 | 280361 | 281090 | 1.49 | 9.24E-02 | transcription_start_site | + | 283987 | 283987 | -3261 | 3830 | AN10246 |
| 2582 | CONTIG15 | 105302 | 105656 | 1.17 | 1.08E-01 | transcription_start_site | + | 105946 | 105946 | -467  | 3836 | AN1025  |
| 2582 | CONTIG15 | 105302 | 105656 | 1.17 | 1.08E-01 | transcription_start_site | + | 106086 | 106086 | -607  | 3837 | AN1025  |
| 2582 | CONTIG15 | 105302 | 105656 | 1.17 | 1.08E-01 | transcription_start_site | + | 106175 | 106175 | -696  | 3838 | AN1025  |
| 2582 | CONTIG15 | 105302 | 105656 | 1.17 | 1.08E-01 | transcription_start_site | + | 106759 | 106759 | -1280 | 3839 | AN1025  |
| 2582 | CONTIG15 | 105302 | 105656 | 1.17 | 1.08E-01 | transcription_start_site | + | 108785 | 108785 | -3306 | 3840 | AN1025  |
| 2582 | CONTIG15 | 105302 | 105656 | 1.17 | 1.08E-01 | transcription_start_site | + | 108937 | 108937 | -3458 | 3841 | AN1025  |
| 708  | CONTIG30 | 69387  | 69651  | 2.19 | 5.20E-03 | transcription_start_site | - | 66934  | 66934  | -2585 | 3846 | AN10251 |
| 708  | CONTIG30 | 69387  | 69651  | 2.19 | 5.20E-03 | transcription_start_site | - | 66860  | 66860  | -2659 | 3847 | AN10251 |
| 708  | CONTIG30 | 69387  | 69651  | 2.19 | 5.20E-03 | transcription_start_site | - | 66569  | 66569  | -2950 | 3848 | AN10251 |
| 2199 | CONTIG30 | 65707  | 65991  | 1.3  | 1.25E-01 | transcription_start_site | - | 66569  | 66569  | 720   | 3848 | AN10251 |
| 2199 | CONTIG30 | 65707  | 65991  | 1.3  | 1.25E-01 | transcription_start_site | - | 66860  | 66860  | 1011  | 3847 | AN10251 |
| 2199 | CONTIG30 | 65707  | 65991  | 1.3  | 1.25E-01 | transcription_start_site | - | 66934  | 66934  | 1085  | 3846 | AN10251 |
| 1003 | CONTIG30 | 14868  | 15355  | 1.91 | 1.57E-02 | transcription_start_site | + | 19108  | 19108  | -3996 | 3852 | AN10254 |
| 1003 | CONTIG30 | 14868  | 15355  | 1.91 | 1.57E-02 | transcription_start_site | + | 19323  | 19323  | -4211 | 3853 | AN10254 |



|      |          |        |        |      |          |                          |   |        |        |       |      |         |
|------|----------|--------|--------|------|----------|--------------------------|---|--------|--------|-------|------|---------|
| 1003 | CONTIG30 | 14868  | 15355  | 1.91 | 1.57E-02 | transcription_start_site | + | 19497  | 19497  | -4385 | 3854 | AN10254 |
| 1003 | CONTIG30 | 14868  | 15355  | 1.91 | 1.57E-02 | transcription_start_site | + | 20100  | 20100  | -4988 | 3855 | AN10254 |
| 1244 | CONTIG34 | 86177  | 86461  | 1.73 | 1.57E-02 | transcription_start_site | + | 86622  | 86622  | -303  | 3884 | AN10265 |
| 1244 | CONTIG34 | 86177  | 86461  | 1.73 | 1.57E-02 | transcription_start_site | + | 86762  | 86762  | -443  | 3885 | AN10265 |
| 1244 | CONTIG34 | 86177  | 86461  | 1.73 | 1.57E-02 | transcription_start_site | + | 87490  | 87490  | -1171 | 3886 | AN10265 |
| 1244 | CONTIG34 | 86177  | 86461  | 1.73 | 1.57E-02 | transcription_start_site | + | 87859  | 87859  | -1540 | 3887 | AN10265 |
| 2292 | CONTIG34 | 137045 | 137394 | 1.27 | 9.24E-02 | transcription_start_site | - | 137858 | 137858 | 638   | 3896 | AN10267 |
| 2292 | CONTIG34 | 137045 | 137394 | 1.27 | 9.24E-02 | transcription_start_site | - | 137980 | 137980 | 760   | 3895 | AN10267 |
| 1244 | CONTIG34 | 86177  | 86461  | 1.73 | 1.57E-02 | transcription_start_site | + | 85623  | 85623  | 696   | 3900 | AN10269 |
| 2051 | CONTIG34 | 154276 | 154561 | 1.35 | 6.84E-02 | transcription_start_site | - | 149367 | 149367 | -5051 | 3907 | AN10272 |
| 798  | CONTIG35 | 49357  | 49725  | 2.1  | 1.54E-03 | transcription_start_site | - | 45540  | 45540  | -4001 | 3913 | AN10274 |
| 798  | CONTIG35 | 49357  | 49725  | 2.1  | 1.54E-03 | transcription_start_site | - | 45211  | 45211  | -4330 | 3914 | AN10274 |
| 798  | CONTIG35 | 49357  | 49725  | 2.1  | 1.54E-03 | transcription_start_site | - | 44890  | 44890  | -4651 | 3915 | AN10274 |
| 798  | CONTIG35 | 49357  | 49725  | 2.1  | 1.54E-03 | transcription_start_site | - | 44764  | 44764  | -4777 | 3916 | AN10274 |
| 798  | CONTIG35 | 49357  | 49725  | 2.1  | 1.54E-03 | transcription_start_site | - | 44469  | 44469  | -5072 | 3917 | AN10274 |
| 2931 | CONTIG35 | 47717  | 47988  | 0.99 | 1.93E-01 | transcription_start_site | - | 45540  | 45540  | -2312 | 3913 | AN10274 |
| 2931 | CONTIG35 | 47717  | 47988  | 0.99 | 1.93E-01 | transcription_start_site | - | 45211  | 45211  | -2641 | 3914 | AN10274 |
| 2931 | CONTIG35 | 47717  | 47988  | 0.99 | 1.93E-01 | transcription_start_site | - | 44890  | 44890  | -2962 | 3915 | AN10274 |
| 2931 | CONTIG35 | 47717  | 47988  | 0.99 | 1.93E-01 | transcription_start_site | - | 44764  | 44764  | -3088 | 3916 | AN10274 |
| 2931 | CONTIG35 | 47717  | 47988  | 0.99 | 1.93E-01 | transcription_start_site | - | 44469  | 44469  | -3383 | 3917 | AN10274 |
| 2931 | CONTIG35 | 47717  | 47988  | 0.99 | 1.93E-01 | transcription_start_site | - | 44340  | 44340  | -3512 | 3918 | AN10274 |
| 2932 | CONTIG35 | 48377  | 48956  | 0.99 | 1.93E-01 | transcription_start_site | - | 45540  | 45540  | -3126 | 3913 | AN10274 |
| 2932 | CONTIG35 | 48377  | 48956  | 0.99 | 1.93E-01 | transcription_start_site | - | 45211  | 45211  | -3455 | 3914 | AN10274 |
| 2932 | CONTIG35 | 48377  | 48956  | 0.99 | 1.93E-01 | transcription_start_site | - | 44890  | 44890  | -3776 | 3915 | AN10274 |
| 2932 | CONTIG35 | 48377  | 48956  | 0.99 | 1.93E-01 | transcription_start_site | - | 44764  | 44764  | -3902 | 3916 | AN10274 |
| 2932 | CONTIG35 | 48377  | 48956  | 0.99 | 1.93E-01 | transcription_start_site | - | 44469  | 44469  | -4197 | 3917 | AN10274 |
| 2932 | CONTIG35 | 48377  | 48956  | 0.99 | 1.93E-01 | transcription_start_site | - | 44340  | 44340  | -4326 | 3918 | AN10274 |
| 2930 | CONTIG35 | 41187  | 41986  | 0.99 | 1.93E-01 | transcription_start_site | - | 42161  | 42161  | 574   | 3921 | AN10277 |
| 2930 | CONTIG35 | 41187  | 41986  | 0.99 | 1.93E-01 | transcription_start_site | - | 42419  | 42419  | 832   | 3920 | AN10277 |
| 2931 | CONTIG35 | 47717  | 47988  | 0.99 | 1.93E-01 | transcription_start_site | - | 43452  | 43452  | -4400 | 3919 | AN10277 |
| 2932 | CONTIG35 | 48377  | 48956  | 0.99 | 1.93E-01 | transcription_start_site | - | 43452  | 43452  | -5214 | 3919 | AN10277 |
| 2997 | CONTIG15 | 119046 | 120220 | 0.92 | 1.47E-01 | transcription_start_site | - | 116987 | 116987 | -2646 | 3927 | AN1028  |
| 2997 | CONTIG15 | 119046 | 120220 | 0.92 | 1.47E-01 | transcription_start_site | - | 116182 | 116182 | -3451 | 3928 | AN1028  |
| 2997 | CONTIG15 | 119046 | 120220 | 0.92 | 1.47E-01 | transcription_start_site | - | 115844 | 115844 | -3789 | 3929 | AN1028  |
| 2997 | CONTIG15 | 119046 | 120220 | 0.92 | 1.47E-01 | transcription_start_site | - | 114946 | 114946 | -4687 | 3930 | AN1028  |
| 2997 | CONTIG15 | 119046 | 120220 | 0.92 | 1.47E-01 | transcription_start_site | - | 114765 | 114765 | -4868 | 3931 | AN1028  |
| 2293 | CONTIG36 | 78093  | 78667  | 1.27 | 1.07E-01 | transcription_start_site | + | 78547  | 78547  | -167  | 3932 | AN10280 |
| 2293 | CONTIG36 | 78093  | 78667  | 1.27 | 1.07E-01 | transcription_start_site | + | 78692  | 78692  | -312  | 3933 | AN10280 |
| 2293 | CONTIG36 | 78093  | 78667  | 1.27 | 1.07E-01 | transcription_start_site | - | 78055  | 78055  | -325  | 3934 | AN10281 |
| 2293 | CONTIG36 | 78093  | 78667  | 1.27 | 1.07E-01 | transcription_start_site | - | 77822  | 77822  | -558  | 3935 | AN10281 |
| 2293 | CONTIG36 | 78093  | 78667  | 1.27 | 1.07E-01 | transcription_start_site | - | 77231  | 77231  | -1149 | 3936 | AN10281 |
| 2443 | CONTIG36 | 80043  | 80387  | 1.22 | 1.44E-01 | transcription_start_site | - | 78055  | 78055  | -2160 | 3934 | AN10281 |
| 2443 | CONTIG36 | 80043  | 80387  | 1.22 | 1.44E-01 | transcription_start_site | - | 77822  | 77822  | -2393 | 3935 | AN10281 |
| 2443 | CONTIG36 | 80043  | 80387  | 1.22 | 1.44E-01 | transcription_start_site | - | 77231  | 77231  | -2984 | 3936 | AN10281 |
| 2293 | CONTIG36 | 78093  | 78667  | 1.27 | 1.07E-01 | transcription_start_site | - | 75763  | 75763  | -2617 | 3937 | AN10282 |
| 2293 | CONTIG36 | 78093  | 78667  | 1.27 | 1.07E-01 | transcription_start_site | - | 75686  | 75686  | -2694 | 3938 | AN10282 |
| 2293 | CONTIG36 | 78093  | 78667  | 1.27 | 1.07E-01 | transcription_start_site | - | 75559  | 75559  | -2821 | 3939 | AN10282 |
| 2293 | CONTIG36 | 78093  | 78667  | 1.27 | 1.07E-01 | transcription_start_site | - | 75358  | 75358  | -3022 | 3940 | AN10282 |
| 2293 | CONTIG36 | 78093  | 78667  | 1.27 | 1.07E-01 | transcription_start_site | - | 75187  | 75187  | -3193 | 3941 | AN10282 |
| 2293 | CONTIG36 | 78093  | 78667  | 1.27 | 1.07E-01 | transcription_start_site | - | 75067  | 75067  | -3313 | 3942 | AN10282 |
| 2293 | CONTIG36 | 78093  | 78667  | 1.27 | 1.07E-01 | transcription_start_site | - | 74269  | 74269  | -4111 | 3943 | AN10282 |
| 2443 | CONTIG36 | 80043  | 80387  | 1.22 | 1.44E-01 | transcription_start_site | - | 75763  | 75763  | -4452 | 3937 | AN10282 |
| 2443 | CONTIG36 | 80043  | 80387  | 1.22 | 1.44E-01 | transcription_start_site | - | 75686  | 75686  | -4529 | 3938 | AN10282 |
| 2443 | CONTIG36 | 80043  | 80387  | 1.22 | 1.44E-01 | transcription_start_site | - | 75559  | 75559  | -4656 | 3939 | AN10282 |
| 2443 | CONTIG36 | 80043  | 80387  | 1.22 | 1.44E-01 | transcription_start_site | - | 75358  | 75358  | -4857 | 3940 | AN10282 |
| 2443 | CONTIG36 | 80043  | 80387  | 1.22 | 1.44E-01 | transcription_start_site | - | 75187  | 75187  | -5028 | 3941 | AN10282 |
| 2443 | CONTIG36 | 80043  | 80387  | 1.22 | 1.44E-01 | transcription_start_site | - | 75067  | 75067  | -5148 | 3942 | AN10282 |

|      |          |        |        |      |          |                          |   |        |        |       |      |         |
|------|----------|--------|--------|------|----------|--------------------------|---|--------|--------|-------|------|---------|
| 428  | CONTIG38 | 102527 | 102806 | 2.55 | 0.00E+00 | transcription_start_site | - | 101902 | 101902 | -764  | 3947 | AN10285 |
| 2103 | CONTIG38 | 101417 | 101676 | 1.33 | 4.36E-02 | transcription_start_site | - | 101902 | 101902 | 355   | 3947 | AN10285 |
| 2923 | CONTIG38 | 157365 | 157709 | 0.99 | 1.66E-01 | transcription_start_site | + | 162308 | 162308 | -4771 | 3948 | AN10286 |
| 2923 | CONTIG38 | 157365 | 157709 | 0.99 | 1.66E-01 | transcription_start_site | + | 162614 | 162614 | -5077 | 3949 | AN10286 |
| 1324 | CONTIG38 | 194491 | 194755 | 1.67 | 8.81E-03 | transcription_start_site | - | 194502 | 194502 | -121  | 3951 | AN10287 |
| 1324 | CONTIG38 | 194491 | 194755 | 1.67 | 8.81E-03 | transcription_start_site | - | 193910 | 193910 | -713  | 3952 | AN10287 |
| 1324 | CONTIG38 | 194491 | 194755 | 1.67 | 8.81E-03 | transcription_start_site | - | 193579 | 193579 | -1044 | 3953 | AN10287 |
| 1324 | CONTIG38 | 194491 | 194755 | 1.67 | 8.81E-03 | transcription_start_site | + | 197679 | 197679 | -3056 | 3954 | AN10288 |
| 1324 | CONTIG38 | 194491 | 194755 | 1.67 | 8.81E-03 | transcription_start_site | + | 197918 | 197918 | -3295 | 3955 | AN10288 |
| 2211 | CONTIG15 | 123840 | 124869 | 1.29 | 4.42E-02 | transcription_start_site | - | 120200 | 120200 | -4154 | 3958 | AN1029  |
| 2211 | CONTIG15 | 123840 | 124869 | 1.29 | 4.42E-02 | transcription_start_site | - | 119772 | 119772 | -4582 | 3959 | AN1029  |
| 2211 | CONTIG15 | 123840 | 124869 | 1.29 | 4.42E-02 | transcription_start_site | - | 119251 | 119251 | -5103 | 3960 | AN1029  |
| 2997 | CONTIG15 | 119046 | 120220 | 0.92 | 1.47E-01 | transcription_start_site | - | 119772 | 119772 | 139   | 3959 | AN1029  |
| 2997 | CONTIG15 | 119046 | 120220 | 0.92 | 1.47E-01 | transcription_start_site | - | 119251 | 119251 | -382  | 3960 | AN1029  |
| 2997 | CONTIG15 | 119046 | 120220 | 0.92 | 1.47E-01 | transcription_start_site | - | 120200 | 120200 | 567   | 3958 | AN1029  |
| 2997 | CONTIG15 | 119046 | 120220 | 0.92 | 1.47E-01 | transcription_start_site | - | 118617 | 118617 | -1016 | 3961 | AN1029  |
| 428  | CONTIG38 | 102527 | 102806 | 2.55 | 0.00E+00 | transcription_start_site | - | 97550  | 97550  | -5116 | 3962 | AN10290 |
| 1805 | CONTIG38 | 97132  | 97420  | 1.45 | 2.62E-02 | transcription_start_site | - | 97346  | 97346  | 70    | 3963 | AN10290 |
| 1805 | CONTIG38 | 97132  | 97420  | 1.45 | 2.62E-02 | transcription_start_site | - | 97550  | 97550  | 274   | 3962 | AN10290 |
| 2103 | CONTIG38 | 101417 | 101676 | 1.33 | 4.36E-02 | transcription_start_site | - | 97550  | 97550  | -3996 | 3962 | AN10290 |
| 2103 | CONTIG38 | 101417 | 101676 | 1.33 | 4.36E-02 | transcription_start_site | - | 97346  | 97346  | -4200 | 3963 | AN10290 |
| 1052 | CONTIG38 | 1511   | 1851   | 1.86 | 3.61E-03 | transcription_start_site | + | 571    | 571    | 1110  | 3965 | AN10291 |
| 2923 | CONTIG38 | 157365 | 157709 | 0.99 | 1.66E-01 | transcription_start_site | + | 158310 | 158310 | -773  | 3966 | AN10292 |
| 2923 | CONTIG38 | 157365 | 157709 | 0.99 | 1.66E-01 | transcription_start_site | + | 158507 | 158507 | -970  | 3967 | AN10292 |
| 2923 | CONTIG38 | 157365 | 157709 | 0.99 | 1.66E-01 | transcription_start_site | + | 158590 | 158590 | -1053 | 3968 | AN10292 |
| 2923 | CONTIG38 | 157365 | 157709 | 0.99 | 1.66E-01 | transcription_start_site | + | 159965 | 159965 | -2428 | 3969 | AN10292 |
| 2923 | CONTIG38 | 157365 | 157709 | 0.99 | 1.66E-01 | transcription_start_site | + | 161109 | 161109 | -3572 | 3970 | AN10292 |
| 1324 | CONTIG38 | 194491 | 194755 | 1.67 | 8.81E-03 | transcription_start_site | - | 195180 | 195180 | 557   | 3973 | AN10293 |
| 1324 | CONTIG38 | 194491 | 194755 | 1.67 | 8.81E-03 | transcription_start_site | + | 199372 | 199372 | -4749 | 3974 | AN10294 |
| 1324 | CONTIG38 | 194491 | 194755 | 1.67 | 8.81E-03 | transcription_start_site | + | 199555 | 199555 | -4932 | 3975 | AN10294 |
| 2213 | CONTIG38 | 213096 | 213520 | 1.29 | 5.22E-02 | transcription_start_site | + | 213393 | 213393 | -85   | 3977 | AN10295 |
| 2213 | CONTIG38 | 213096 | 213520 | 1.29 | 5.22E-02 | transcription_start_site | + | 212877 | 212877 | 431   | 3976 | AN10295 |
| 2213 | CONTIG38 | 213096 | 213520 | 1.29 | 5.22E-02 | transcription_start_site | + | 214298 | 214298 | -990  | 3978 | AN10295 |
| 2970 | CONTIG38 | 213976 | 214262 | 0.95 | 1.93E-01 | transcription_start_site | + | 214298 | 214298 | -179  | 3978 | AN10295 |
| 2970 | CONTIG38 | 213976 | 214262 | 0.95 | 1.93E-01 | transcription_start_site | + | 213393 | 213393 | 726   | 3977 | AN10295 |
| 1406 | CONTIG39 | 167103 | 167472 | 1.63 | 5.88E-02 | transcription_start_site | - | 164415 | 164415 | -2872 | 3980 | AN10297 |
| 1406 | CONTIG39 | 167103 | 167472 | 1.63 | 5.88E-02 | transcription_start_site | - | 163305 | 163305 | -3982 | 3981 | AN10297 |
| 1406 | CONTIG39 | 167103 | 167472 | 1.63 | 5.88E-02 | transcription_start_site | - | 162249 | 162249 | -5038 | 3982 | AN10297 |
| 2272 | CONTIG39 | 21694  | 22033  | 1.28 | 1.66E-01 | transcription_start_site | + | 21824  | 21824  | 39    | 3991 | AN10299 |
| 2272 | CONTIG39 | 21694  | 22033  | 1.28 | 1.66E-01 | transcription_start_site | + | 21750  | 21750  | 113   | 3990 | AN10299 |
| 2272 | CONTIG39 | 21694  | 22033  | 1.28 | 1.66E-01 | transcription_start_site | + | 22832  | 22832  | -968  | 3992 | AN10299 |
| 2997 | CONTIG15 | 119046 | 120220 | 0.92 | 1.47E-01 | transcription_start_site | + | 121571 | 121571 | -1938 | 3993 | AN1030  |
| 1869 | CONTIG39 | 160284 | 160628 | 1.43 | 1.08E-01 | transcription_start_site | - | 160503 | 160503 | 47    | 3996 | AN10300 |
| 1869 | CONTIG39 | 160284 | 160628 | 1.43 | 1.08E-01 | transcription_start_site | - | 160600 | 160600 | 144   | 3995 | AN10300 |
| 1869 | CONTIG39 | 160284 | 160628 | 1.43 | 1.08E-01 | transcription_start_site | - | 160737 | 160737 | 281   | 3994 | AN10300 |
| 1869 | CONTIG39 | 160284 | 160628 | 1.43 | 1.08E-01 | transcription_start_site | - | 159856 | 159856 | -600  | 3997 | AN10300 |
| 1869 | CONTIG39 | 160284 | 160628 | 1.43 | 1.08E-01 | transcription_start_site | - | 158974 | 158974 | -1482 | 3998 | AN10300 |
| 1498 | CONTIG40 | 27161  | 27597  | 1.59 | 7.51E-02 | transcription_start_site | - | 27253  | 27253  | -126  | 4018 | AN10307 |
| 1498 | CONTIG40 | 27161  | 27597  | 1.59 | 7.51E-02 | transcription_start_site | - | 26997  | 26997  | -382  | 4019 | AN10307 |
| 2211 | CONTIG15 | 123840 | 124869 | 1.29 | 4.42E-02 | transcription_start_site | - | 124640 | 124640 | 285   | 4028 | AN1031  |
| 2211 | CONTIG15 | 123840 | 124869 | 1.29 | 4.42E-02 | transcription_start_site | - | 124022 | 124022 | -332  | 4029 | AN1031  |
| 2211 | CONTIG15 | 123840 | 124869 | 1.29 | 4.42E-02 | transcription_start_site | - | 123817 | 123817 | -537  | 4030 | AN1031  |
| 2211 | CONTIG15 | 123840 | 124869 | 1.29 | 4.42E-02 | transcription_start_site | - | 124967 | 124967 | 612   | 4027 | AN1031  |
| 2211 | CONTIG15 | 123840 | 124869 | 1.29 | 4.42E-02 | transcription_start_site | - | 125100 | 125100 | 745   | 4026 | AN1031  |
| 2211 | CONTIG15 | 123840 | 124869 | 1.29 | 4.42E-02 | transcription_start_site | - | 125412 | 125412 | 1057  | 4025 | AN1031  |
| 2583 | CONTIG15 | 125945 | 126279 | 1.17 | 1.08E-01 | transcription_start_site | - | 125412 | 125412 | -700  | 4025 | AN1031  |
| 2583 | CONTIG15 | 125945 | 126279 | 1.17 | 1.08E-01 | transcription_start_site | - | 125100 | 125100 | -1012 | 4026 | AN1031  |

|               |        |        |      |          |                          |   |        |        |       |              |
|---------------|--------|--------|------|----------|--------------------------|---|--------|--------|-------|--------------|
| 2583 CONTIG15 | 125945 | 126279 | 1.17 | 1.08E-01 | transcription_start_site | - | 124967 | 124967 | -1145 | 4027 AN1031  |
| 2583 CONTIG15 | 125945 | 126279 | 1.17 | 1.08E-01 | transcription_start_site | - | 124640 | 124640 | -1472 | 4028 AN1031  |
| 2583 CONTIG15 | 125945 | 126279 | 1.17 | 1.08E-01 | transcription_start_site | - | 124022 | 124022 | -2090 | 4029 AN1031  |
| 2583 CONTIG15 | 125945 | 126279 | 1.17 | 1.08E-01 | transcription_start_site | - | 123817 | 123817 | -2295 | 4030 AN1031  |
| 2996 CONTIG15 | 130285 | 131759 | 0.92 | 1.05E-01 | transcription_start_site | - | 125412 | 125412 | -5610 | 4025 AN1031  |
| 1388 CONTIG40 | 142741 | 143020 | 1.64 | 8.01E-02 | transcription_start_site | + | 146168 | 146168 | -3287 | 4031 AN10310 |
| 331 CONTIG41  | 391    | 730    | 2.72 | 4.61E-03 | transcription_start_site | + | 43     | 43     | 517   | 4037 AN10314 |
| 659 CONTIG43  | 49067  | 49333  | 2.23 | 1.80E-03 | transcription_start_site | + | 50588  | 50588  | -1388 | 4044 AN10318 |
| 659 CONTIG43  | 49067  | 49333  | 2.23 | 1.80E-03 | transcription_start_site | + | 50962  | 50962  | -1762 | 4045 AN10318 |
| 837 CONTIG43  | 49512  | 50016  | 2.06 | 4.61E-03 | transcription_start_site | + | 50588  | 50588  | -824  | 4044 AN10318 |
| 837 CONTIG43  | 49512  | 50016  | 2.06 | 4.61E-03 | transcription_start_site | + | 50962  | 50962  | -1198 | 4045 AN10318 |
| 2583 CONTIG15 | 125945 | 126279 | 1.17 | 1.08E-01 | transcription_start_site | - | 126690 | 126690 | 578   | 4051 AN1032  |
| 2996 CONTIG15 | 130285 | 131759 | 0.92 | 1.05E-01 | transcription_start_site | - | 126690 | 126690 | -4332 | 4051 AN1032  |
| 1871 CONTIG43 | 209795 | 211194 | 1.42 | 2.86E-02 | transcription_start_site | - | 209109 | 209109 | -1385 | 4053 AN10321 |
| 1871 CONTIG43 | 209795 | 211194 | 1.42 | 2.86E-02 | transcription_start_site | - | 209006 | 209006 | -1488 | 4054 AN10321 |
| 1871 CONTIG43 | 209795 | 211194 | 1.42 | 2.86E-02 | transcription_start_site | - | 208426 | 208426 | -2068 | 4055 AN10321 |
| 2617 CONTIG43 | 208294 | 208853 | 1.16 | 1.44E-01 | transcription_start_site | - | 208426 | 208426 | -147  | 4055 AN10321 |
| 2617 CONTIG43 | 208294 | 208853 | 1.16 | 1.44E-01 | transcription_start_site | - | 209006 | 209006 | 432   | 4054 AN10321 |
| 2617 CONTIG43 | 208294 | 208853 | 1.16 | 1.44E-01 | transcription_start_site | - | 209109 | 209109 | 535   | 4053 AN10321 |
| 659 CONTIG43  | 49067  | 49333  | 2.23 | 1.80E-03 | transcription_start_site | + | 51373  | 51373  | -2173 | 4058 AN10323 |
| 659 CONTIG43  | 49067  | 49333  | 2.23 | 1.80E-03 | transcription_start_site | + | 51758  | 51758  | -2558 | 4059 AN10323 |
| 659 CONTIG43  | 49067  | 49333  | 2.23 | 1.80E-03 | transcription_start_site | + | 51880  | 51880  | -2680 | 4060 AN10323 |
| 837 CONTIG43  | 49512  | 50016  | 2.06 | 4.61E-03 | transcription_start_site | + | 51373  | 51373  | -1609 | 4058 AN10323 |
| 837 CONTIG43  | 49512  | 50016  | 2.06 | 4.61E-03 | transcription_start_site | + | 51758  | 51758  | -1994 | 4059 AN10323 |
| 837 CONTIG43  | 49512  | 50016  | 2.06 | 4.61E-03 | transcription_start_site | + | 51880  | 51880  | -2116 | 4060 AN10323 |
| 1876 CONTIG43 | 11416  | 11685  | 1.42 | 5.88E-02 | transcription_start_site | + | 16015  | 16015  | -4464 | 4061 AN10324 |
| 1876 CONTIG43 | 11416  | 11685  | 1.42 | 5.88E-02 | transcription_start_site | + | 16118  | 16118  | -4567 | 4062 AN10324 |
| 1876 CONTIG43 | 11416  | 11685  | 1.42 | 5.88E-02 | transcription_start_site | + | 16286  | 16286  | -4735 | 4063 AN10324 |
| 1876 CONTIG43 | 11416  | 11685  | 1.42 | 5.88E-02 | transcription_start_site | + | 16677  | 16677  | -5126 | 4064 AN10324 |
| 655 CONTIG43  | 115519 | 115853 | 2.23 | 0.00E+00 | transcription_start_site | + | 120141 | 120141 | -4455 | 4065 AN10325 |
| 1871 CONTIG43 | 209795 | 211194 | 1.42 | 2.86E-02 | transcription_start_site | - | 210497 | 210497 | 2     | 4069 AN10327 |
| 1871 CONTIG43 | 209795 | 211194 | 1.42 | 2.86E-02 | transcription_start_site | - | 211265 | 211265 | 770   | 4068 AN10327 |
| 1150 CONTIG45 | 43293  | 43642  | 1.79 | 2.16E-04 | transcription_start_site | + | 44020  | 44020  | -552  | 4070 AN10329 |
| 2428 CONTIG45 | 40055  | 40344  | 1.22 | 1.57E-02 | transcription_start_site | + | 44020  | 44020  | -3820 | 4070 AN10329 |
| 2739 CONTIG45 | 41180  | 41614  | 1.1  | 3.08E-02 | transcription_start_site | + | 44020  | 44020  | -2623 | 4070 AN10329 |
| 2211 CONTIG15 | 123840 | 124869 | 1.29 | 4.42E-02 | transcription_start_site | + | 127296 | 127296 | -2941 | 4071 AN1033  |
| 2211 CONTIG15 | 123840 | 124869 | 1.29 | 4.42E-02 | transcription_start_site | + | 127868 | 127868 | -3513 | 4072 AN1033  |
| 2211 CONTIG15 | 123840 | 124869 | 1.29 | 4.42E-02 | transcription_start_site | + | 128139 | 128139 | -3784 | 4073 AN1033  |
| 2583 CONTIG15 | 125945 | 126279 | 1.17 | 1.08E-01 | transcription_start_site | + | 127296 | 127296 | -1184 | 4071 AN1033  |
| 2583 CONTIG15 | 125945 | 126279 | 1.17 | 1.08E-01 | transcription_start_site | + | 127868 | 127868 | -1756 | 4072 AN1033  |
| 2583 CONTIG15 | 125945 | 126279 | 1.17 | 1.08E-01 | transcription_start_site | + | 128139 | 128139 | -2027 | 4073 AN1033  |
| 1150 CONTIG45 | 43293  | 43642  | 1.79 | 2.16E-04 | transcription_start_site | + | 45428  | 45428  | -1960 | 4074 AN10330 |
| 1150 CONTIG45 | 43293  | 43642  | 1.79 | 2.16E-04 | transcription_start_site | + | 45578  | 45578  | -2110 | 4075 AN10330 |
| 1150 CONTIG45 | 43293  | 43642  | 1.79 | 2.16E-04 | transcription_start_site | + | 45700  | 45700  | -2232 | 4076 AN10330 |
| 1150 CONTIG45 | 43293  | 43642  | 1.79 | 2.16E-04 | transcription_start_site | + | 45924  | 45924  | -2456 | 4077 AN10330 |
| 1150 CONTIG45 | 43293  | 43642  | 1.79 | 2.16E-04 | transcription_start_site | + | 46085  | 46085  | -2617 | 4078 AN10330 |
| 2739 CONTIG45 | 41180  | 41614  | 1.1  | 3.08E-02 | transcription_start_site | + | 45428  | 45428  | -4031 | 4074 AN10330 |
| 2739 CONTIG45 | 41180  | 41614  | 1.1  | 3.08E-02 | transcription_start_site | + | 45578  | 45578  | -4181 | 4075 AN10330 |
| 2739 CONTIG45 | 41180  | 41614  | 1.1  | 3.08E-02 | transcription_start_site | + | 45700  | 45700  | -4303 | 4076 AN10330 |
| 2739 CONTIG45 | 41180  | 41614  | 1.1  | 3.08E-02 | transcription_start_site | + | 45924  | 45924  | -4527 | 4077 AN10330 |
| 2739 CONTIG45 | 41180  | 41614  | 1.1  | 3.08E-02 | transcription_start_site | + | 46085  | 46085  | -4688 | 4078 AN10330 |
| 624 CONTIG46  | 13652  | 14011  | 2.28 | 3.61E-03 | transcription_start_site | + | 15572  | 15572  | -1740 | 4079 AN10331 |
| 624 CONTIG46  | 13652  | 14011  | 2.28 | 3.61E-03 | transcription_start_site | + | 15818  | 15818  | -1986 | 4080 AN10331 |
| 624 CONTIG46  | 13652  | 14011  | 2.28 | 3.61E-03 | transcription_start_site | + | 16646  | 16646  | -2814 | 4081 AN10331 |
| 624 CONTIG46  | 13652  | 14011  | 2.28 | 3.61E-03 | transcription_start_site | + | 16759  | 16759  | -2927 | 4082 AN10331 |
| 624 CONTIG46  | 13652  | 14011  | 2.28 | 3.61E-03 | transcription_start_site | + | 17007  | 17007  | -3175 | 4083 AN10331 |
| 624 CONTIG46  | 13652  | 14011  | 2.28 | 3.61E-03 | transcription_start_site | + | 17228  | 17228  | -3396 | 4084 AN10331 |

|      |          |        |        |      |          |                          |   |        |        |       |      |         |
|------|----------|--------|--------|------|----------|--------------------------|---|--------|--------|-------|------|---------|
| 624  | CONTIG46 | 13652  | 14011  | 2.28 | 3.61E-03 | transcription_start_site | + | 17425  | 17425  | -3593 | 4085 | AN10331 |
| 624  | CONTIG46 | 13652  | 14011  | 2.28 | 3.61E-03 | transcription_start_site | + | 13784  | 13784  | 47    | 4086 | AN10332 |
| 624  | CONTIG46 | 13652  | 14011  | 2.28 | 3.61E-03 | transcription_start_site | + | 14296  | 14296  | -464  | 4087 | AN10332 |
| 624  | CONTIG46 | 13652  | 14011  | 2.28 | 3.61E-03 | transcription_start_site | + | 15103  | 15103  | -1271 | 4088 | AN10332 |
| 703  | CONTIG46 | 8701   | 9050   | 2.19 | 2.32E-03 | transcription_start_site | + | 13784  | 13784  | -4908 | 4086 | AN10332 |
| 1727 | CONTIG46 | 9696   | 9970   | 1.49 | 6.84E-02 | transcription_start_site | + | 13784  | 13784  | -3951 | 4086 | AN10332 |
| 1727 | CONTIG46 | 9696   | 9970   | 1.49 | 6.84E-02 | transcription_start_site | + | 14296  | 14296  | -4463 | 4087 | AN10332 |
| 2498 | CONTIG47 | 70353  | 71152  | 1.2  | 4.42E-02 | transcription_start_site | + | 70139  | 70139  | 613   | 4090 | AN10334 |
| 2253 | CONTIG49 | 50188  | 50677  | 1.28 | 6.84E-02 | transcription_start_site | - | 50725  | 50725  | 292   | 4093 | AN10335 |
| 2253 | CONTIG49 | 50188  | 50677  | 1.28 | 6.84E-02 | transcription_start_site | - | 51024  | 51024  | 591   | 4092 | AN10335 |
| 2253 | CONTIG49 | 50188  | 50677  | 1.28 | 6.84E-02 | transcription_start_site | - | 51138  | 51138  | 705   | 4091 | AN10335 |
| 2780 | CONTIG49 | 70518  | 70927  | 1.08 | 1.44E-01 | transcription_start_site | - | 70566  | 70566  | -156  | 4094 | AN10336 |
| 2780 | CONTIG49 | 70518  | 70927  | 1.08 | 1.44E-01 | transcription_start_site | - | 70472  | 70472  | -250  | 4095 | AN10336 |
| 2253 | CONTIG49 | 50188  | 50677  | 1.28 | 6.84E-02 | transcription_start_site | - | 49330  | 49330  | -1102 | 4099 | AN10338 |
| 2253 | CONTIG49 | 50188  | 50677  | 1.28 | 6.84E-02 | transcription_start_site | - | 48953  | 48953  | -1479 | 4100 | AN10338 |
| 2253 | CONTIG49 | 50188  | 50677  | 1.28 | 6.84E-02 | transcription_start_site | - | 48677  | 48677  | -1755 | 4101 | AN10338 |
| 2780 | CONTIG49 | 70518  | 70927  | 1.08 | 1.44E-01 | transcription_start_site | - | 68742  | 68742  | -1980 | 4102 | AN10339 |
| 2780 | CONTIG49 | 70518  | 70927  | 1.08 | 1.44E-01 | transcription_start_site | - | 68622  | 68622  | -2100 | 4103 | AN10339 |
| 2211 | CONTIG15 | 123840 | 124869 | 1.29 | 4.42E-02 | transcription_start_site | + | 129597 | 129597 | -5242 | 4104 | AN1034  |
| 2471 | CONTIG15 | 135310 | 136179 | 1.21 | 7.51E-02 | transcription_start_site | + | 138281 | 138281 | -2536 | 4105 | AN1034  |
| 2471 | CONTIG15 | 135310 | 136179 | 1.21 | 7.51E-02 | transcription_start_site | + | 138463 | 138463 | -2718 | 4106 | AN1034  |
| 2579 | CONTIG15 | 132910 | 133639 | 1.17 | 9.26E-02 | transcription_start_site | + | 138281 | 138281 | -5006 | 4105 | AN1034  |
| 2579 | CONTIG15 | 132910 | 133639 | 1.17 | 9.26E-02 | transcription_start_site | + | 138463 | 138463 | -5188 | 4106 | AN1034  |
| 2583 | CONTIG15 | 125945 | 126279 | 1.17 | 1.08E-01 | transcription_start_site | + | 129597 | 129597 | -3485 | 4104 | AN1034  |
| 2846 | CONTIG15 | 136895 | 137990 | 1.04 | 1.66E-01 | transcription_start_site | + | 138281 | 138281 | -838  | 4105 | AN1034  |
| 2846 | CONTIG15 | 136895 | 137990 | 1.04 | 1.66E-01 | transcription_start_site | + | 138463 | 138463 | -1020 | 4106 | AN1034  |
| 2996 | CONTIG15 | 130285 | 131759 | 0.92 | 1.05E-01 | transcription_start_site | + | 129597 | 129597 | 1425  | 4104 | AN1034  |
| 2369 | CONTIG49 | 92719  | 93283  | 1.24 | 8.01E-02 | transcription_start_site | + | 96152  | 96152  | -3151 | 4111 | AN10342 |
| 1481 | CONTIG50 | 18152  | 18431  | 1.6  | 8.01E-02 | transcription_start_site | + | 18787  | 18787  | -495  | 4114 | AN10343 |
| 1481 | CONTIG50 | 18152  | 18431  | 1.6  | 8.01E-02 | transcription_start_site | + | 18938  | 18938  | -646  | 4115 | AN10343 |
| 1481 | CONTIG50 | 18152  | 18431  | 1.6  | 8.01E-02 | transcription_start_site | + | 17613  | 17613  | 678   | 4113 | AN10343 |
| 1481 | CONTIG50 | 18152  | 18431  | 1.6  | 8.01E-02 | transcription_start_site | + | 17382  | 17382  | 909   | 4112 | AN10343 |
| 1481 | CONTIG50 | 18152  | 18431  | 1.6  | 8.01E-02 | transcription_start_site | + | 20288  | 20288  | -1996 | 4116 | AN10344 |
| 1481 | CONTIG50 | 18152  | 18431  | 1.6  | 8.01E-02 | transcription_start_site | + | 20435  | 20435  | -2143 | 4117 | AN10344 |
| 1481 | CONTIG50 | 18152  | 18431  | 1.6  | 8.01E-02 | transcription_start_site | + | 20597  | 20597  | -2305 | 4118 | AN10344 |
| 1481 | CONTIG50 | 18152  | 18431  | 1.6  | 8.01E-02 | transcription_start_site | + | 20993  | 20993  | -2701 | 4119 | AN10344 |
| 1481 | CONTIG50 | 18152  | 18431  | 1.6  | 8.01E-02 | transcription_start_site | + | 21505  | 21505  | -3213 | 4120 | AN10344 |
| 1481 | CONTIG50 | 18152  | 18431  | 1.6  | 8.01E-02 | transcription_start_site | + | 21642  | 21642  | -3350 | 4121 | AN10344 |
| 1654 | CONTIG51 | 23344  | 23611  | 1.52 | 8.01E-02 | transcription_start_site | + | 22834  | 22834  | 643   | 4125 | AN10345 |
| 1654 | CONTIG51 | 23344  | 23611  | 1.52 | 8.01E-02 | transcription_start_site | + | 22513  | 22513  | 964   | 4124 | AN10345 |
| 2471 | CONTIG15 | 135310 | 136179 | 1.21 | 7.51E-02 | transcription_start_site | + | 139055 | 139055 | -3310 | 4136 | AN1035  |
| 2471 | CONTIG15 | 135310 | 136179 | 1.21 | 7.51E-02 | transcription_start_site | + | 139374 | 139374 | -3629 | 4137 | AN1035  |
| 2471 | CONTIG15 | 135310 | 136179 | 1.21 | 7.51E-02 | transcription_start_site | + | 139638 | 139638 | -3893 | 4138 | AN1035  |
| 2846 | CONTIG15 | 136895 | 137990 | 1.04 | 1.66E-01 | transcription_start_site | + | 139055 | 139055 | -1612 | 4136 | AN1035  |
| 2846 | CONTIG15 | 136895 | 137990 | 1.04 | 1.66E-01 | transcription_start_site | + | 139374 | 139374 | -1931 | 4137 | AN1035  |
| 2846 | CONTIG15 | 136895 | 137990 | 1.04 | 1.66E-01 | transcription_start_site | + | 139638 | 139638 | -2195 | 4138 | AN1035  |
| 1436 | CONTIG51 | 399902 | 400181 | 1.62 | 5.88E-02 | transcription_start_site | - | 399365 | 399365 | -676  | 4139 | AN10350 |
| 1436 | CONTIG51 | 399902 | 400181 | 1.62 | 5.88E-02 | transcription_start_site | - | 399221 | 399221 | -820  | 4140 | AN10350 |
| 1436 | CONTIG51 | 399902 | 400181 | 1.62 | 5.88E-02 | transcription_start_site | - | 398931 | 398931 | -1110 | 4141 | AN10350 |
| 1436 | CONTIG51 | 399902 | 400181 | 1.62 | 5.88E-02 | transcription_start_site | - | 398574 | 398574 | -1467 | 4142 | AN10350 |
| 1436 | CONTIG51 | 399902 | 400181 | 1.62 | 5.88E-02 | transcription_start_site | - | 397882 | 397882 | -2159 | 4143 | AN10350 |
| 1436 | CONTIG51 | 399902 | 400181 | 1.62 | 5.88E-02 | transcription_start_site | - | 397738 | 397738 | -2303 | 4144 | AN10350 |
| 1436 | CONTIG51 | 399902 | 400181 | 1.62 | 5.88E-02 | transcription_start_site | - | 396550 | 396550 | -3491 | 4145 | AN10350 |
| 2020 | CONTIG51 | 753760 | 754114 | 1.37 | 1.25E-01 | transcription_start_site | - | 754879 | 754879 | 942   | 4154 | AN10352 |
| 108  | CONTIG51 | 954903 | 955192 | 3.19 | 0.00E+00 | transcription_start_site | + | 958477 | 958477 | -3429 | 4157 | AN10354 |
| 108  | CONTIG51 | 954903 | 955192 | 3.19 | 0.00E+00 | transcription_start_site | + | 958675 | 958675 | -3627 | 4158 | AN10354 |
| 108  | CONTIG51 | 954903 | 955192 | 3.19 | 0.00E+00 | transcription_start_site | + | 958937 | 958937 | -3889 | 4159 | AN10354 |

|      |          |         |         |      |          |                          |   |         |         |       |      |         |
|------|----------|---------|---------|------|----------|--------------------------|---|---------|---------|-------|------|---------|
| 154  | CONTIG51 | 967728  | 968092  | 3.04 | 2.67E-04 | transcription_start_site | - | 967007  | 967007  | -903  | 4160 | AN10355 |
| 531  | CONTIG51 | 966678  | 967112  | 2.4  | 4.46E-04 | transcription_start_site | - | 967007  | 967007  | 112   | 4160 | AN10355 |
| 574  | CONTIG51 | 1032303 | 1032577 | 2.35 | 4.61E-03 | transcription_start_site | - | 1030316 | 1030316 | -2124 | 4165 | AN10357 |
| 574  | CONTIG51 | 1032303 | 1032577 | 2.35 | 4.61E-03 | transcription_start_site | - | 1030096 | 1030096 | -2344 | 4166 | AN10357 |
| 574  | CONTIG51 | 1032303 | 1032577 | 2.35 | 4.61E-03 | transcription_start_site | - | 1029910 | 1029910 | -2530 | 4167 | AN10357 |
| 574  | CONTIG51 | 1032303 | 1032577 | 2.35 | 4.61E-03 | transcription_start_site | - | 1029466 | 1029466 | -2974 | 4168 | AN10357 |
| 574  | CONTIG51 | 1032303 | 1032577 | 2.35 | 4.61E-03 | transcription_start_site | - | 1029338 | 1029338 | -3102 | 4169 | AN10357 |
| 1528 | CONTIG51 | 1030888 | 1031977 | 1.57 | 5.05E-02 | transcription_start_site | - | 1030316 | 1030316 | -1116 | 4165 | AN10357 |
| 1528 | CONTIG51 | 1030888 | 1031977 | 1.57 | 5.05E-02 | transcription_start_site | - | 1030096 | 1030096 | -1336 | 4166 | AN10357 |
| 1528 | CONTIG51 | 1030888 | 1031977 | 1.57 | 5.05E-02 | transcription_start_site | - | 1029910 | 1029910 | -1522 | 4167 | AN10357 |
| 1528 | CONTIG51 | 1030888 | 1031977 | 1.57 | 5.05E-02 | transcription_start_site | - | 1029466 | 1029466 | -1966 | 4168 | AN10357 |
| 1528 | CONTIG51 | 1030888 | 1031977 | 1.57 | 5.05E-02 | transcription_start_site | - | 1029338 | 1029338 | -2094 | 4169 | AN10357 |
| 1654 | CONTIG51 | 23344   | 23611   | 1.52 | 8.01E-02 | transcription_start_site | + | 23683   | 23683   | -205  | 4170 | AN10358 |
| 1654 | CONTIG51 | 23344   | 23611   | 1.52 | 8.01E-02 | transcription_start_site | + | 23868   | 23868   | -390  | 4171 | AN10358 |
| 1654 | CONTIG51 | 23344   | 23611   | 1.52 | 8.01E-02 | transcription_start_site | + | 24220   | 24220   | -742  | 4172 | AN10358 |
| 1654 | CONTIG51 | 23344   | 23611   | 1.52 | 8.01E-02 | transcription_start_site | + | 24444   | 24444   | -966  | 4173 | AN10358 |
| 522  | CONTIG15 | 154220  | 154494  | 2.41 | 2.16E-04 | transcription_start_site | - | 150464  | 150464  | -3893 | 4176 | AN1036  |
| 522  | CONTIG15 | 154220  | 154494  | 2.41 | 2.16E-04 | transcription_start_site | - | 150023  | 150023  | -4334 | 4177 | AN1036  |
| 522  | CONTIG15 | 154220  | 154494  | 2.41 | 2.16E-04 | transcription_start_site | - | 149923  | 149923  | -4434 | 4178 | AN1036  |
| 1366 | CONTIG15 | 152195  | 152529  | 1.65 | 1.57E-02 | transcription_start_site | - | 150464  | 150464  | -1898 | 4176 | AN1036  |
| 1366 | CONTIG15 | 152195  | 152529  | 1.65 | 1.57E-02 | transcription_start_site | - | 150023  | 150023  | -2339 | 4177 | AN1036  |
| 1366 | CONTIG15 | 152195  | 152529  | 1.65 | 1.57E-02 | transcription_start_site | - | 149923  | 149923  | -2439 | 4178 | AN1036  |
| 1895 | CONTIG15 | 146866  | 147200  | 1.41 | 4.36E-02 | transcription_start_site | - | 144501  | 144501  | -2532 | 4179 | AN1036  |
| 1895 | CONTIG15 | 146866  | 147200  | 1.41 | 4.36E-02 | transcription_start_site | - | 143927  | 143927  | -3106 | 4180 | AN1036  |
| 2776 | CONTIG15 | 145051  | 146765  | 1.08 | 1.01E-01 | transcription_start_site | - | 144501  | 144501  | -1407 | 4179 | AN1036  |
| 2776 | CONTIG15 | 145051  | 146765  | 1.08 | 1.01E-01 | transcription_start_site | - | 143927  | 143927  | -1981 | 4180 | AN1036  |
| 2844 | CONTIG15 | 147606  | 148705  | 1.04 | 1.59E-01 | transcription_start_site | - | 144501  | 144501  | -3654 | 4179 | AN1036  |
| 2844 | CONTIG15 | 147606  | 148705  | 1.04 | 1.59E-01 | transcription_start_site | - | 143927  | 143927  | -4228 | 4180 | AN1036  |
| 1436 | CONTIG51 | 399902  | 400181  | 1.62 | 5.88E-02 | transcription_start_site | - | 395646  | 395646  | -4395 | 4181 | AN10360 |
| 1436 | CONTIG51 | 399902  | 400181  | 1.62 | 5.88E-02 | transcription_start_site | - | 395449  | 395449  | -4592 | 4182 | AN10360 |
| 2146 | CONTIG51 | 392337  | 392623  | 1.32 | 1.44E-01 | transcription_start_site | - | 392334  | 392334  | -146  | 4187 | AN10362 |
| 2146 | CONTIG51 | 392337  | 392623  | 1.32 | 1.44E-01 | transcription_start_site | - | 392040  | 392040  | -440  | 4188 | AN10362 |
| 2146 | CONTIG51 | 392337  | 392623  | 1.32 | 1.44E-01 | transcription_start_site | - | 391818  | 391818  | -662  | 4189 | AN10362 |
| 2020 | CONTIG51 | 753760  | 754114  | 1.37 | 1.25E-01 | transcription_start_site | - | 754153  | 754153  | 216   | 4192 | AN10364 |
| 108  | CONTIG51 | 954903  | 955192  | 3.19 | 0.00E+00 | transcription_start_site | + | 959435  | 959435  | -4387 | 4193 | AN10365 |
| 108  | CONTIG51 | 954903  | 955192  | 3.19 | 0.00E+00 | transcription_start_site | + | 959720  | 959720  | -4672 | 4194 | AN10365 |
| 574  | CONTIG51 | 1032303 | 1032577 | 2.35 | 4.61E-03 | transcription_start_site | - | 1028178 | 1028178 | -4262 | 4196 | AN10367 |
| 1528 | CONTIG51 | 1030888 | 1031977 | 1.57 | 5.05E-02 | transcription_start_site | - | 1028178 | 1028178 | -3254 | 4196 | AN10367 |
| 338  | CONTIG51 | 566044  | 566313  | 2.7  | 1.01E-03 | transcription_start_site | + | 566466  | 566466  | -287  | 4201 | AN10369 |
| 338  | CONTIG51 | 566044  | 566313  | 2.7  | 1.01E-03 | transcription_start_site | + | 566714  | 566714  | -535  | 4202 | AN10369 |
| 338  | CONTIG51 | 566044  | 566313  | 2.7  | 1.01E-03 | transcription_start_site | + | 566956  | 566956  | -777  | 4203 | AN10369 |
| 338  | CONTIG51 | 566044  | 566313  | 2.7  | 1.01E-03 | transcription_start_site | + | 567309  | 567309  | -1130 | 4204 | AN10369 |
| 338  | CONTIG51 | 566044  | 566313  | 2.7  | 1.01E-03 | transcription_start_site | + | 567438  | 567438  | -1259 | 4205 | AN10369 |
| 496  | CONTIG51 | 563029  | 563468  | 2.45 | 0.00E+00 | transcription_start_site | + | 566466  | 566466  | -3217 | 4201 | AN10369 |
| 496  | CONTIG51 | 563029  | 563468  | 2.45 | 0.00E+00 | transcription_start_site | + | 566714  | 566714  | -3465 | 4202 | AN10369 |
| 496  | CONTIG51 | 563029  | 563468  | 2.45 | 0.00E+00 | transcription_start_site | + | 566956  | 566956  | -3707 | 4203 | AN10369 |
| 496  | CONTIG51 | 563029  | 563468  | 2.45 | 0.00E+00 | transcription_start_site | + | 567309  | 567309  | -4060 | 4204 | AN10369 |
| 496  | CONTIG51 | 563029  | 563468  | 2.45 | 0.00E+00 | transcription_start_site | + | 567438  | 567438  | -4189 | 4205 | AN10369 |
| 522  | CONTIG15 | 154220  | 154494  | 2.41 | 2.16E-04 | transcription_start_site | - | 153367  | 153367  | -990  | 4206 | AN1037  |
| 1242 | CONTIG15 | 155570  | 156054  | 1.73 | 1.11E-02 | transcription_start_site | - | 153367  | 153367  | -2445 | 4206 | AN1037  |
| 1366 | CONTIG15 | 152195  | 152529  | 1.65 | 1.57E-02 | transcription_start_site | - | 153367  | 153367  | 1005  | 4206 | AN1037  |
| 2425 | CONTIG51 | 466443  | 466779  | 1.23 | 1.93E-01 | transcription_start_site | - | 463167  | 463167  | -3444 | 4207 | AN10370 |
| 2425 | CONTIG51 | 466443  | 466779  | 1.23 | 1.93E-01 | transcription_start_site | - | 462775  | 462775  | -3836 | 4208 | AN10370 |
| 2425 | CONTIG51 | 466443  | 466779  | 1.23 | 1.93E-01 | transcription_start_site | - | 462598  | 462598  | -4013 | 4209 | AN10370 |
| 154  | CONTIG51 | 967728  | 968092  | 3.04 | 2.67E-04 | transcription_start_site | - | 964030  | 964030  | -3880 | 4222 | AN10377 |
| 154  | CONTIG51 | 967728  | 968092  | 3.04 | 2.67E-04 | transcription_start_site | - | 963711  | 963711  | -4199 | 4223 | AN10377 |
| 531  | CONTIG51 | 966678  | 967112  | 2.4  | 4.46E-04 | transcription_start_site | - | 964030  | 964030  | -2865 | 4222 | AN10377 |

|      |          |        |        |      |          |                          |   |        |        |       |      |         |
|------|----------|--------|--------|------|----------|--------------------------|---|--------|--------|-------|------|---------|
| 531  | CONTIG51 | 966678 | 967112 | 2.4  | 4.46E-04 | transcription_start_site | - | 963711 | 963711 | -3184 | 4223 | AN10377 |
| 684  | CONTIG51 | 964063 | 964627 | 2.21 | 3.31E-03 | transcription_start_site | - | 964030 | 964030 | -315  | 4222 | AN10377 |
| 684  | CONTIG51 | 964063 | 964627 | 2.21 | 3.31E-03 | transcription_start_site | - | 963711 | 963711 | -634  | 4223 | AN10377 |
| 1065 | CONTIG52 | 49128  | 49492  | 1.86 | 6.84E-02 | transcription_start_site | + | 49797  | 49797  | -487  | 4224 | AN10378 |
| 1065 | CONTIG52 | 49128  | 49492  | 1.86 | 6.84E-02 | transcription_start_site | + | 50101  | 50101  | -791  | 4225 | AN10378 |
| 1065 | CONTIG52 | 49128  | 49492  | 1.86 | 6.84E-02 | transcription_start_site | + | 50257  | 50257  | -947  | 4226 | AN10378 |
| 1065 | CONTIG52 | 49128  | 49492  | 1.86 | 6.84E-02 | transcription_start_site | + | 50587  | 50587  | -1277 | 4227 | AN10378 |
| 392  | CONTIG52 | 65412  | 65686  | 2.62 | 7.85E-03 | transcription_start_site | - | 62947  | 62947  | -2602 | 4228 | AN10379 |
| 392  | CONTIG52 | 65412  | 65686  | 2.62 | 7.85E-03 | transcription_start_site | - | 62479  | 62479  | -3070 | 4229 | AN10379 |
| 392  | CONTIG52 | 65412  | 65686  | 2.62 | 7.85E-03 | transcription_start_site | - | 61945  | 61945  | -3604 | 4230 | AN10379 |
| 1310 | CONTIG52 | 62857  | 63141  | 1.69 | 1.08E-01 | transcription_start_site | - | 62947  | 62947  | -52   | 4228 | AN10379 |
| 1310 | CONTIG52 | 62857  | 63141  | 1.69 | 1.08E-01 | transcription_start_site | - | 62479  | 62479  | -520  | 4229 | AN10379 |
| 1310 | CONTIG52 | 62857  | 63141  | 1.69 | 1.08E-01 | transcription_start_site | - | 61945  | 61945  | -1054 | 4230 | AN10379 |
| 1242 | CONTIG15 | 155570 | 156054 | 1.73 | 1.11E-02 | transcription_start_site | - | 156330 | 156330 | 518   | 4234 | AN1038  |
| 1065 | CONTIG52 | 49128  | 49492  | 1.86 | 6.84E-02 | transcription_start_site | + | 52124  | 52124  | -2814 | 4235 | AN10380 |
| 1065 | CONTIG52 | 49128  | 49492  | 1.86 | 6.84E-02 | transcription_start_site | + | 52290  | 52290  | -2980 | 4236 | AN10380 |
| 1065 | CONTIG52 | 49128  | 49492  | 1.86 | 6.84E-02 | transcription_start_site | + | 52407  | 52407  | -3097 | 4237 | AN10380 |
| 1065 | CONTIG52 | 49128  | 49492  | 1.86 | 6.84E-02 | transcription_start_site | + | 52599  | 52599  | -3289 | 4238 | AN10380 |
| 1065 | CONTIG52 | 49128  | 49492  | 1.86 | 6.84E-02 | transcription_start_site | + | 53497  | 53497  | -4187 | 4239 | AN10380 |
| 392  | CONTIG52 | 65412  | 65686  | 2.62 | 7.85E-03 | transcription_start_site | - | 61583  | 61583  | -3966 | 4240 | AN10381 |
| 1310 | CONTIG52 | 62857  | 63141  | 1.69 | 1.08E-01 | transcription_start_site | - | 61583  | 61583  | -1416 | 4240 | AN10381 |
| 375  | CONTIG53 | 41496  | 41920  | 2.65 | 3.03E-03 | transcription_start_site | - | 37331  | 37331  | -4377 | 4251 | AN10386 |
| 375  | CONTIG53 | 41496  | 41920  | 2.65 | 3.03E-03 | transcription_start_site | - | 36919  | 36919  | -4789 | 4252 | AN10386 |
| 375  | CONTIG53 | 41496  | 41920  | 2.65 | 3.03E-03 | transcription_start_site | - | 36703  | 36703  | -5005 | 4253 | AN10386 |
| 175  | CONTIG55 | 8106   | 8395   | 2.99 | 0.00E+00 | transcription_start_site | - | 8089   | 8089   | -161  | 4263 | AN10389 |
| 175  | CONTIG55 | 8106   | 8395   | 2.99 | 0.00E+00 | transcription_start_site | - | 7807   | 7807   | -443  | 4264 | AN10389 |
| 175  | CONTIG55 | 8106   | 8395   | 2.99 | 0.00E+00 | transcription_start_site | - | 7528   | 7528   | -722  | 4265 | AN10389 |
| 175  | CONTIG55 | 8106   | 8395   | 2.99 | 0.00E+00 | transcription_start_site | - | 7399   | 7399   | -851  | 4266 | AN10389 |
| 175  | CONTIG55 | 8106   | 8395   | 2.99 | 0.00E+00 | transcription_start_site | - | 6719   | 6719   | -1531 | 4267 | AN10389 |
| 1910 | CONTIG55 | 8862   | 9506   | 1.4  | 3.08E-02 | transcription_start_site | - | 8089   | 8089   | -1095 | 4263 | AN10389 |
| 1910 | CONTIG55 | 8862   | 9506   | 1.4  | 3.08E-02 | transcription_start_site | - | 7807   | 7807   | -1377 | 4264 | AN10389 |
| 1910 | CONTIG55 | 8862   | 9506   | 1.4  | 3.08E-02 | transcription_start_site | - | 7528   | 7528   | -1656 | 4265 | AN10389 |
| 1910 | CONTIG55 | 8862   | 9506   | 1.4  | 3.08E-02 | transcription_start_site | - | 7399   | 7399   | -1785 | 4266 | AN10389 |
| 1910 | CONTIG55 | 8862   | 9506   | 1.4  | 3.08E-02 | transcription_start_site | - | 6719   | 6719   | -2465 | 4267 | AN10389 |
| 2104 | CONTIG55 | 7201   | 7775   | 1.33 | 4.36E-02 | transcription_start_site | - | 7528   | 7528   | 40    | 4265 | AN10389 |
| 2104 | CONTIG55 | 7201   | 7775   | 1.33 | 4.36E-02 | transcription_start_site | - | 7399   | 7399   | -89   | 4266 | AN10389 |
| 2104 | CONTIG55 | 7201   | 7775   | 1.33 | 4.36E-02 | transcription_start_site | - | 7807   | 7807   | 319   | 4264 | AN10389 |
| 2104 | CONTIG55 | 7201   | 7775   | 1.33 | 4.36E-02 | transcription_start_site | - | 8089   | 8089   | 601   | 4263 | AN10389 |
| 2104 | CONTIG55 | 7201   | 7775   | 1.33 | 4.36E-02 | transcription_start_site | - | 6719   | 6719   | -769  | 4267 | AN10389 |
| 2941 | CONTIG55 | 137327 | 137616 | 0.98 | 1.66E-01 | transcription_start_site | + | 141707 | 141707 | -4235 | 4275 | AN10391 |
| 2941 | CONTIG55 | 137327 | 137616 | 0.98 | 1.66E-01 | transcription_start_site | + | 142405 | 142405 | -4933 | 4276 | AN10391 |
| 433  | CONTIG55 | 264692 | 264957 | 2.54 | 0.00E+00 | transcription_start_site | + | 264241 | 264241 | 583   | 4279 | AN10392 |
| 433  | CONTIG55 | 264692 | 264957 | 2.54 | 0.00E+00 | transcription_start_site | + | 265119 | 265119 | -294  | 4296 | AN10399 |
| 433  | CONTIG55 | 264692 | 264957 | 2.54 | 0.00E+00 | transcription_start_site | + | 265656 | 265656 | -831  | 4297 | AN10399 |
| 433  | CONTIG55 | 264692 | 264957 | 2.54 | 0.00E+00 | transcription_start_site | + | 266071 | 266071 | -1246 | 4298 | AN10399 |
| 175  | CONTIG55 | 8106   | 8395   | 2.99 | 0.00E+00 | transcription_start_site | - | 8455   | 8455   | 204   | 4311 | AN10402 |
| 175  | CONTIG55 | 8106   | 8395   | 2.99 | 0.00E+00 | transcription_start_site | - | 8736   | 8736   | 485   | 4310 | AN10402 |
| 175  | CONTIG55 | 8106   | 8395   | 2.99 | 0.00E+00 | transcription_start_site | - | 9004   | 9004   | 753   | 4309 | AN10402 |
| 1910 | CONTIG55 | 8862   | 9506   | 1.4  | 3.08E-02 | transcription_start_site | - | 9004   | 9004   | -180  | 4309 | AN10402 |
| 1910 | CONTIG55 | 8862   | 9506   | 1.4  | 3.08E-02 | transcription_start_site | - | 8736   | 8736   | -448  | 4310 | AN10402 |
| 1910 | CONTIG55 | 8862   | 9506   | 1.4  | 3.08E-02 | transcription_start_site | - | 8455   | 8455   | -729  | 4311 | AN10402 |
| 1910 | CONTIG55 | 8862   | 9506   | 1.4  | 3.08E-02 | transcription_start_site | - | 10094  | 10094  | 910   | 4308 | AN10402 |
| 2104 | CONTIG55 | 7201   | 7775   | 1.33 | 4.36E-02 | transcription_start_site | - | 8455   | 8455   | 967   | 4311 | AN10402 |
| 2104 | CONTIG55 | 7201   | 7775   | 1.33 | 4.36E-02 | transcription_start_site | - | 8736   | 8736   | 1248  | 4310 | AN10402 |
| 2972 | CONTIG55 | 54093  | 54437  | 0.95 | 1.93E-01 | transcription_start_site | - | 49776  | 49776  | -4489 | 4312 | AN10403 |
| 1361 | CONTIG56 | 22735  | 23011  | 1.66 | 9.24E-02 | transcription_start_site | + | 23141  | 23141  | -268  | 4318 | AN10407 |
| 1361 | CONTIG56 | 22735  | 23011  | 1.66 | 9.24E-02 | transcription_start_site | + | 23466  | 23466  | -593  | 4319 | AN10407 |



|      |          |        |        |      |          |                          |   |        |        |       |      |         |
|------|----------|--------|--------|------|----------|--------------------------|---|--------|--------|-------|------|---------|
| 1361 | CONTIG56 | 22735  | 23011  | 1.66 | 9.24E-02 | transcription_start_site | + | 24302  | 24302  | -1429 | 4320 | AN10407 |
| 1361 | CONTIG56 | 22735  | 23011  | 1.66 | 9.24E-02 | transcription_start_site | + | 24567  | 24567  | -1694 | 4321 | AN10407 |
| 1362 | CONTIG15 | 171379 | 172038 | 1.65 | 7.16E-03 | transcription_start_site | + | 171244 | 171244 | 464   | 4328 | AN1041  |
| 1362 | CONTIG15 | 171379 | 172038 | 1.65 | 7.16E-03 | transcription_start_site | + | 170873 | 170873 | 835   | 4327 | AN1041  |
| 477  | CONTIG57 | 24620  | 25042  | 2.48 | 1.11E-02 | transcription_start_site | - | 20517  | 20517  | -4314 | 4329 | AN10410 |
| 477  | CONTIG57 | 24620  | 25042  | 2.48 | 1.11E-02 | transcription_start_site | - | 20153  | 20153  | -4678 | 4330 | AN10410 |
| 3048 | CONTIG58 | 6376   | 6823   | 0.77 | 1.66E-01 | transcription_start_site | - | 6447   | 6447   | -152  | 4336 | AN10413 |
| 1737 | CONTIG58 | 15996  | 16400  | 1.48 | 3.03E-03 | transcription_start_site | - | 12926  | 12926  | -3272 | 4337 | AN10414 |
| 1737 | CONTIG58 | 15996  | 16400  | 1.48 | 3.03E-03 | transcription_start_site | - | 12521  | 12521  | -3677 | 4338 | AN10414 |
| 1737 | CONTIG58 | 15996  | 16400  | 1.48 | 3.03E-03 | transcription_start_site | - | 12299  | 12299  | -3899 | 4339 | AN10414 |
| 1737 | CONTIG58 | 15996  | 16400  | 1.48 | 3.03E-03 | transcription_start_site | - | 11576  | 11576  | -4622 | 4340 | AN10414 |
| 3048 | CONTIG58 | 6376   | 6823   | 0.77 | 1.66E-01 | transcription_start_site | - | 7745   | 7745   | 1145  | 4366 | AN10418 |
| 2128 | CONTIG59 | 127295 | 127714 | 1.32 | 2.62E-02 | transcription_start_site | + | 127031 | 127031 | 473   | 4367 | AN10419 |
| 1362 | CONTIG15 | 171379 | 172038 | 1.65 | 7.16E-03 | transcription_start_site | - | 172522 | 172522 | 813   | 4369 | AN1042  |
| 1477 | CONTIG59 | 141757 | 142266 | 1.6  | 6.61E-03 | transcription_start_site | + | 142710 | 142710 | -698  | 4370 | AN10420 |
| 1477 | CONTIG59 | 141757 | 142266 | 1.6  | 6.61E-03 | transcription_start_site | + | 142826 | 142826 | -814  | 4371 | AN10420 |
| 1477 | CONTIG59 | 141757 | 142266 | 1.6  | 6.61E-03 | transcription_start_site | + | 143293 | 143293 | -1281 | 4372 | AN10420 |
| 1611 | CONTIG59 | 129530 | 130344 | 1.53 | 1.17E-03 | transcription_start_site | + | 129103 | 129103 | 834   | 4377 | AN10421 |
| 1611 | CONTIG59 | 129530 | 130344 | 1.53 | 1.17E-03 | transcription_start_site | + | 128706 | 128706 | 1231  | 4376 | AN10421 |
| 2128 | CONTIG59 | 127295 | 127714 | 1.32 | 2.62E-02 | transcription_start_site | + | 128226 | 128226 | -721  | 4373 | AN10421 |
| 2128 | CONTIG59 | 127295 | 127714 | 1.32 | 2.62E-02 | transcription_start_site | + | 128446 | 128446 | -941  | 4374 | AN10421 |
| 2128 | CONTIG59 | 127295 | 127714 | 1.32 | 2.62E-02 | transcription_start_site | + | 128525 | 128525 | -1020 | 4375 | AN10421 |
| 2128 | CONTIG59 | 127295 | 127714 | 1.32 | 2.62E-02 | transcription_start_site | + | 128706 | 128706 | -1201 | 4376 | AN10421 |
| 2128 | CONTIG59 | 127295 | 127714 | 1.32 | 2.62E-02 | transcription_start_site | + | 129103 | 129103 | -1598 | 4377 | AN10421 |
| 2946 | CONTIG59 | 128345 | 128829 | 0.97 | 1.07E-01 | transcription_start_site | + | 128525 | 128525 | 62    | 4375 | AN10421 |
| 2946 | CONTIG59 | 128345 | 128829 | 0.97 | 1.07E-01 | transcription_start_site | + | 128706 | 128706 | -119  | 4376 | AN10421 |
| 2946 | CONTIG59 | 128345 | 128829 | 0.97 | 1.07E-01 | transcription_start_site | + | 128446 | 128446 | 141   | 4374 | AN10421 |
| 2946 | CONTIG59 | 128345 | 128829 | 0.97 | 1.07E-01 | transcription_start_site | + | 128226 | 128226 | 361   | 4373 | AN10421 |
| 2946 | CONTIG59 | 128345 | 128829 | 0.97 | 1.07E-01 | transcription_start_site | + | 129103 | 129103 | -516  | 4377 | AN10421 |
| 996  | CONTIG59 | 130970 | 131229 | 1.91 | 1.01E-03 | transcription_start_site | + | 130052 | 130052 | 1047  | 4378 | AN10422 |
| 1611 | CONTIG59 | 129530 | 130344 | 1.53 | 1.17E-03 | transcription_start_site | + | 130052 | 130052 | -115  | 4378 | AN10422 |
| 2128 | CONTIG59 | 127295 | 127714 | 1.32 | 2.62E-02 | transcription_start_site | + | 130052 | 130052 | -2547 | 4378 | AN10422 |
| 2946 | CONTIG59 | 128345 | 128829 | 0.97 | 1.07E-01 | transcription_start_site | + | 130052 | 130052 | -1465 | 4378 | AN10422 |
| 1477 | CONTIG59 | 141757 | 142266 | 1.6  | 6.61E-03 | transcription_start_site | + | 144996 | 144996 | -2984 | 4379 | AN10423 |
| 1477 | CONTIG59 | 141757 | 142266 | 1.6  | 6.61E-03 | transcription_start_site | + | 145788 | 145788 | -3776 | 4380 | AN10423 |
| 1477 | CONTIG59 | 141757 | 142266 | 1.6  | 6.61E-03 | transcription_start_site | + | 146291 | 146291 | -4279 | 4381 | AN10423 |
| 2994 | CONTIG60 | 56626  | 57070  | 0.92 | 6.84E-02 | transcription_start_site | + | 58382  | 58382  | -1534 | 4396 | AN10427 |
| 2994 | CONTIG60 | 56626  | 57070  | 0.92 | 6.84E-02 | transcription_start_site | + | 58858  | 58858  | -2010 | 4397 | AN10427 |
| 1023 | CONTIG61 | 174688 | 175252 | 1.89 | 1.30E-02 | transcription_start_site | + | 179813 | 179813 | -4843 | 4404 | AN10429 |
| 1023 | CONTIG61 | 174688 | 175252 | 1.89 | 1.30E-02 | transcription_start_site | + | 180001 | 180001 | -5031 | 4405 | AN10429 |
| 1023 | CONTIG61 | 174688 | 175252 | 1.89 | 1.30E-02 | transcription_start_site | + | 180158 | 180158 | -5188 | 4406 | AN10429 |
| 1362 | CONTIG15 | 171379 | 172038 | 1.65 | 7.16E-03 | transcription_start_site | + | 173975 | 173975 | -2266 | 4409 | AN1043  |
| 1362 | CONTIG15 | 171379 | 172038 | 1.65 | 7.16E-03 | transcription_start_site | + | 174329 | 174329 | -2620 | 4410 | AN1043  |
| 1362 | CONTIG15 | 171379 | 172038 | 1.65 | 7.16E-03 | transcription_start_site | + | 174846 | 174846 | -3137 | 4411 | AN1043  |
| 1362 | CONTIG15 | 171379 | 172038 | 1.65 | 7.16E-03 | transcription_start_site | + | 175185 | 175185 | -3476 | 4412 | AN1043  |
| 1362 | CONTIG15 | 171379 | 172038 | 1.65 | 7.16E-03 | transcription_start_site | + | 175425 | 175425 | -3716 | 4413 | AN1043  |
| 1724 | CONTIG61 | 429989 | 430259 | 1.49 | 5.88E-02 | transcription_start_site | - | 430117 | 430117 | -7    | 4434 | AN10436 |
| 1724 | CONTIG61 | 429989 | 430259 | 1.49 | 5.88E-02 | transcription_start_site | - | 429368 | 429368 | -756  | 4435 | AN10436 |
| 1724 | CONTIG61 | 429989 | 430259 | 1.49 | 5.88E-02 | transcription_start_site | - | 428680 | 428680 | -1444 | 4436 | AN10436 |
| 2693 | CONTIG61 | 427519 | 427870 | 1.13 | 1.93E-01 | transcription_start_site | - | 428680 | 428680 | 985   | 4436 | AN10436 |
| 2440 | CONTIG61 | 496952 | 497601 | 1.22 | 1.28E-01 | transcription_start_site | - | 496674 | 496674 | -602  | 4441 | AN10438 |
| 2440 | CONTIG61 | 496952 | 497601 | 1.22 | 1.28E-01 | transcription_start_site | - | 496201 | 496201 | -1075 | 4442 | AN10438 |
| 1139 | CONTIG61 | 549456 | 549810 | 1.8  | 1.84E-02 | transcription_start_site | - | 547675 | 547675 | -1958 | 4457 | AN10441 |
| 1139 | CONTIG61 | 549456 | 549810 | 1.8  | 1.84E-02 | transcription_start_site | - | 547299 | 547299 | -2334 | 4458 | AN10441 |
| 1200 | CONTIG61 | 651680 | 651954 | 1.76 | 2.12E-02 | transcription_start_site | + | 652367 | 652367 | -550  | 4459 | AN10442 |
| 1725 | CONTIG61 | 650045 | 650389 | 1.49 | 5.88E-02 | transcription_start_site | + | 652367 | 652367 | -2150 | 4459 | AN10442 |
| 1274 | CONTIG61 | 718432 | 718711 | 1.71 | 2.62E-02 | transcription_start_site | + | 720776 | 720776 | -2204 | 4469 | AN10445 |

|      |          |        |        |      |          |                          |   |        |        |       |      |         |
|------|----------|--------|--------|------|----------|--------------------------|---|--------|--------|-------|------|---------|
| 1274 | CONTIG61 | 718432 | 718711 | 1.71 | 2.62E-02 | transcription_start_site | + | 720927 | 720927 | -2355 | 4470 | AN10445 |
| 1274 | CONTIG61 | 718432 | 718711 | 1.71 | 2.62E-02 | transcription_start_site | + | 721128 | 721128 | -2556 | 4471 | AN10445 |
| 1274 | CONTIG61 | 718432 | 718711 | 1.71 | 2.62E-02 | transcription_start_site | + | 721272 | 721272 | -2700 | 4472 | AN10445 |
| 1925 | CONTIG61 | 722179 | 722603 | 1.4  | 8.01E-02 | transcription_start_site | + | 721272 | 721272 | 1119  | 4472 | AN10445 |
| 1087 | CONTIG16 | 7893   | 8307   | 1.84 | 1.81E-02 | transcription_start_site | - | 3909   | 3909   | -4191 | 4485 | AN1045  |
| 1330 | CONTIG61 | 438232 | 438594 | 1.67 | 3.08E-02 | transcription_start_site | - | 439004 | 439004 | 591   | 4499 | AN10453 |
| 1330 | CONTIG61 | 438232 | 438594 | 1.67 | 3.08E-02 | transcription_start_site | - | 439154 | 439154 | 741   | 4498 | AN10453 |
| 2440 | CONTIG61 | 496952 | 497601 | 1.22 | 1.28E-01 | transcription_start_site | - | 497920 | 497920 | 643   | 4500 | AN10454 |
| 223  | CONTIG61 | 699092 | 699366 | 2.89 | 0.00E+00 | transcription_start_site | - | 699027 | 699027 | -202  | 4509 | AN10457 |
| 631  | CONTIG61 | 698267 | 698906 | 2.26 | 0.00E+00 | transcription_start_site | - | 699027 | 699027 | 440   | 4509 | AN10457 |
| 277  | CONTIG61 | 407346 | 407755 | 2.8  | 2.67E-04 | transcription_start_site | + | 407083 | 407083 | 467   | 4510 | AN10458 |
| 1331 | CONTIG61 | 450991 | 451340 | 1.67 | 3.08E-02 | transcription_start_site | + | 451413 | 451413 | -247  | 4511 | AN10459 |
| 1331 | CONTIG61 | 450991 | 451340 | 1.67 | 3.08E-02 | transcription_start_site | + | 451550 | 451550 | -384  | 4512 | AN10459 |
| 1331 | CONTIG61 | 450991 | 451340 | 1.67 | 3.08E-02 | transcription_start_site | + | 451665 | 451665 | -499  | 4513 | AN10459 |
| 1331 | CONTIG61 | 450991 | 451340 | 1.67 | 3.08E-02 | transcription_start_site | + | 451856 | 451856 | -690  | 4514 | AN10459 |
| 1331 | CONTIG61 | 450991 | 451340 | 1.67 | 3.08E-02 | transcription_start_site | + | 453096 | 453096 | -1930 | 4515 | AN10459 |
| 2694 | CONTIG61 | 449855 | 450369 | 1.13 | 1.93E-01 | transcription_start_site | + | 451413 | 451413 | -1301 | 4511 | AN10459 |
| 2694 | CONTIG61 | 449855 | 450369 | 1.13 | 1.93E-01 | transcription_start_site | + | 451550 | 451550 | -1438 | 4512 | AN10459 |
| 2694 | CONTIG61 | 449855 | 450369 | 1.13 | 1.93E-01 | transcription_start_site | + | 451665 | 451665 | -1553 | 4513 | AN10459 |
| 2694 | CONTIG61 | 449855 | 450369 | 1.13 | 1.93E-01 | transcription_start_site | + | 451856 | 451856 | -1744 | 4514 | AN10459 |
| 2694 | CONTIG61 | 449855 | 450369 | 1.13 | 1.93E-01 | transcription_start_site | + | 453096 | 453096 | -2984 | 4515 | AN10459 |
| 1724 | CONTIG61 | 429989 | 430259 | 1.49 | 5.88E-02 | transcription_start_site | - | 427889 | 427889 | -2235 | 4518 | AN10460 |
| 2693 | CONTIG61 | 427519 | 427870 | 1.13 | 1.93E-01 | transcription_start_site | - | 427889 | 427889 | 194   | 4518 | AN10460 |
| 361  | CONTIG61 | 816234 | 817328 | 2.66 | 0.00E+00 | transcription_start_site | + | 815758 | 815758 | 1023  | 4519 | AN10461 |
| 537  | CONTIG61 | 812104 | 812913 | 2.39 | 0.00E+00 | transcription_start_site | + | 815758 | 815758 | -3249 | 4519 | AN10461 |
| 1275 | CONTIG61 | 815119 | 815912 | 1.71 | 2.62E-02 | transcription_start_site | + | 815758 | 815758 | -242  | 4519 | AN10461 |
| 730  | CONTIG61 | 515864 | 516138 | 2.17 | 4.61E-03 | transcription_start_site | + | 520527 | 520527 | -4526 | 4531 | AN10465 |
| 730  | CONTIG61 | 515864 | 516138 | 2.17 | 4.61E-03 | transcription_start_site | + | 520791 | 520791 | -4790 | 4532 | AN10465 |
| 730  | CONTIG61 | 515864 | 516138 | 2.17 | 4.61E-03 | transcription_start_site | + | 521066 | 521066 | -5065 | 4533 | AN10465 |
| 1139 | CONTIG61 | 549456 | 549810 | 1.8  | 1.84E-02 | transcription_start_site | - | 545079 | 545079 | -4554 | 4536 | AN10466 |
| 1139 | CONTIG61 | 549456 | 549810 | 1.8  | 1.84E-02 | transcription_start_site | - | 544822 | 544822 | -4811 | 4537 | AN10466 |
| 1139 | CONTIG61 | 549456 | 549810 | 1.8  | 1.84E-02 | transcription_start_site | - | 544648 | 544648 | -4985 | 4538 | AN10466 |
| 1139 | CONTIG61 | 549456 | 549810 | 1.8  | 1.84E-02 | transcription_start_site | - | 544518 | 544518 | -5115 | 4539 | AN10466 |
| 1274 | CONTIG61 | 718432 | 718711 | 1.71 | 2.62E-02 | transcription_start_site | + | 718683 | 718683 | -111  | 4545 | AN10468 |
| 1274 | CONTIG61 | 718432 | 718711 | 1.71 | 2.62E-02 | transcription_start_site | + | 719067 | 719067 | -495  | 4546 | AN10468 |
| 1274 | CONTIG61 | 718432 | 718711 | 1.71 | 2.62E-02 | transcription_start_site | + | 720063 | 720063 | -1491 | 4547 | AN10468 |
| 1274 | CONTIG61 | 718432 | 718711 | 1.71 | 2.62E-02 | transcription_start_site | + | 720208 | 720208 | -1636 | 4548 | AN10468 |
| 1087 | CONTIG16 | 7893   | 8307   | 1.84 | 1.81E-02 | transcription_start_site | + | 8438   | 8438   | -338  | 4552 | AN1047  |
| 1087 | CONTIG16 | 7893   | 8307   | 1.84 | 1.81E-02 | transcription_start_site | + | 8584   | 8584   | -484  | 4553 | AN1047  |
| 1087 | CONTIG16 | 7893   | 8307   | 1.84 | 1.81E-02 | transcription_start_site | + | 8677   | 8677   | -577  | 4554 | AN1047  |
| 1087 | CONTIG16 | 7893   | 8307   | 1.84 | 1.81E-02 | transcription_start_site | + | 10180  | 10180  | -2080 | 4555 | AN1047  |
| 1087 | CONTIG16 | 7893   | 8307   | 1.84 | 1.81E-02 | transcription_start_site | + | 10539  | 10539  | -2439 | 4556 | AN1047  |
| 2350 | CONTIG62 | 82576  | 82850  | 1.25 | 5.88E-02 | transcription_start_site | + | 85831  | 85831  | -3118 | 4557 | AN10470 |
| 2350 | CONTIG62 | 82576  | 82850  | 1.25 | 5.88E-02 | transcription_start_site | + | 85932  | 85932  | -3219 | 4558 | AN10470 |
| 2350 | CONTIG62 | 82576  | 82850  | 1.25 | 5.88E-02 | transcription_start_site | + | 86182  | 86182  | -3469 | 4559 | AN10470 |
| 2350 | CONTIG62 | 82576  | 82850  | 1.25 | 5.88E-02 | transcription_start_site | + | 86362  | 86362  | -3649 | 4560 | AN10470 |
| 2350 | CONTIG62 | 82576  | 82850  | 1.25 | 5.88E-02 | transcription_start_site | + | 87379  | 87379  | -4666 | 4561 | AN10470 |
| 893  | CONTIG62 | 151143 | 151567 | 2    | 0.00E+00 | transcription_start_site | - | 147611 | 147611 | -3744 | 4565 | AN10472 |
| 893  | CONTIG62 | 151143 | 151567 | 2    | 0.00E+00 | transcription_start_site | - | 147462 | 147462 | -3893 | 4566 | AN10472 |
| 893  | CONTIG62 | 151143 | 151567 | 2    | 0.00E+00 | transcription_start_site | - | 147239 | 147239 | -4116 | 4567 | AN10472 |
| 893  | CONTIG62 | 151143 | 151567 | 2    | 0.00E+00 | transcription_start_site | - | 147059 | 147059 | -4296 | 4568 | AN10472 |
| 893  | CONTIG62 | 151143 | 151567 | 2    | 0.00E+00 | transcription_start_site | - | 146600 | 146600 | -4755 | 4569 | AN10472 |
| 893  | CONTIG62 | 151143 | 151567 | 2    | 0.00E+00 | transcription_start_site | - | 146176 | 146176 | -5179 | 4570 | AN10472 |
| 2973 | CONTIG62 | 526    | 895    | 0.95 | 1.93E-01 | transcription_start_site | + | 128    | 128    | 582   | 4577 | AN10476 |
| 1087 | CONTIG16 | 7893   | 8307   | 1.84 | 1.81E-02 | transcription_start_site | + | 12978  | 12978  | -4878 | 4586 | AN1048  |
| 1599 | CONTIG16 | 14713  | 15357  | 1.54 | 5.52E-02 | transcription_start_site | + | 13901  | 13901  | 1134  | 4588 | AN1048  |
| 2044 | CONTIG63 | 6001   | 6666   | 1.36 | 1.07E-01 | transcription_start_site | + | 5654   | 5654   | 679   | 4590 | AN10481 |

|      |          |        |        |      |          |                          |   |        |        |       |      |         |
|------|----------|--------|--------|------|----------|--------------------------|---|--------|--------|-------|------|---------|
| 10   | CONTIG63 | 7291   | 7550   | 3.69 | 0.00E+00 | transcription_start_site | + | 8017   | 8017   | -596  | 4594 | AN10483 |
| 10   | CONTIG63 | 7291   | 7550   | 3.69 | 0.00E+00 | transcription_start_site | + | 8244   | 8244   | -823  | 4595 | AN10483 |
| 2044 | CONTIG63 | 6001   | 6666   | 1.36 | 1.07E-01 | transcription_start_site | + | 8017   | 8017   | -1683 | 4594 | AN10483 |
| 2044 | CONTIG63 | 6001   | 6666   | 1.36 | 1.07E-01 | transcription_start_site | + | 8244   | 8244   | -1910 | 4595 | AN10483 |
| 2986 | CONTIG64 | 22818  | 23542  | 0.93 | 1.59E-01 | transcription_start_site | + | 26116  | 26116  | -2936 | 4602 | AN10486 |
| 2986 | CONTIG64 | 22818  | 23542  | 0.93 | 1.59E-01 | transcription_start_site | + | 27182  | 27182  | -4002 | 4603 | AN10486 |
| 2986 | CONTIG64 | 22818  | 23542  | 0.93 | 1.59E-01 | transcription_start_site | + | 28230  | 28230  | -5050 | 4604 | AN10486 |
| 486  | CONTIG64 | 87241  | 87650  | 2.46 | 0.00E+00 | transcription_start_site | - | 83119  | 83119  | -4326 | 4605 | AN10487 |
| 486  | CONTIG64 | 87241  | 87650  | 2.46 | 0.00E+00 | transcription_start_site | - | 82789  | 82789  | -4656 | 4606 | AN10487 |
| 486  | CONTIG64 | 87241  | 87650  | 2.46 | 0.00E+00 | transcription_start_site | - | 82704  | 82704  | -4741 | 4607 | AN10487 |
| 486  | CONTIG64 | 87241  | 87650  | 2.46 | 0.00E+00 | transcription_start_site | - | 82481  | 82481  | -4964 | 4608 | AN10487 |
| 1788 | CONTIG64 | 84676  | 84960  | 1.46 | 1.57E-02 | transcription_start_site | - | 83119  | 83119  | -1699 | 4605 | AN10487 |
| 1788 | CONTIG64 | 84676  | 84960  | 1.46 | 1.57E-02 | transcription_start_site | - | 82789  | 82789  | -2029 | 4606 | AN10487 |
| 1788 | CONTIG64 | 84676  | 84960  | 1.46 | 1.57E-02 | transcription_start_site | - | 82704  | 82704  | -2114 | 4607 | AN10487 |
| 1788 | CONTIG64 | 84676  | 84960  | 1.46 | 1.57E-02 | transcription_start_site | - | 82481  | 82481  | -2337 | 4608 | AN10487 |
| 1788 | CONTIG64 | 84676  | 84960  | 1.46 | 1.57E-02 | transcription_start_site | - | 81948  | 81948  | -2870 | 4609 | AN10487 |
| 1788 | CONTIG64 | 84676  | 84960  | 1.46 | 1.57E-02 | transcription_start_site | - | 81566  | 81566  | -3252 | 4610 | AN10487 |
| 2654 | CONTIG64 | 13729  | 14153  | 1.14 | 6.84E-02 | transcription_start_site | - | 10642  | 10642  | -3299 | 4613 | AN10489 |
| 2654 | CONTIG64 | 13729  | 14153  | 1.14 | 6.84E-02 | transcription_start_site | - | 10499  | 10499  | -3442 | 4614 | AN10489 |
| 2654 | CONTIG64 | 13729  | 14153  | 1.14 | 6.84E-02 | transcription_start_site | - | 10012  | 10012  | -3929 | 4615 | AN10489 |
| 2654 | CONTIG64 | 13729  | 14153  | 1.14 | 6.84E-02 | transcription_start_site | - | 9240   | 9240   | -4701 | 4616 | AN10489 |
| 1599 | CONTIG16 | 14713  | 15357  | 1.54 | 5.52E-02 | transcription_start_site | + | 14390  | 14390  | 645   | 4617 | AN1049  |
| 1151 | CONTIG64 | 18919  | 19193  | 1.79 | 3.03E-03 | transcription_start_site | + | 23203  | 23203  | -4147 | 4619 | AN10491 |
| 1151 | CONTIG64 | 18919  | 19193  | 1.79 | 3.03E-03 | transcription_start_site | + | 24177  | 24177  | -5121 | 4620 | AN10491 |
| 2986 | CONTIG64 | 22818  | 23542  | 0.93 | 1.59E-01 | transcription_start_site | + | 23203  | 23203  | -23   | 4619 | AN10491 |
| 2986 | CONTIG64 | 22818  | 23542  | 0.93 | 1.59E-01 | transcription_start_site | + | 24177  | 24177  | -997  | 4620 | AN10491 |
| 2986 | CONTIG64 | 22818  | 23542  | 0.93 | 1.59E-01 | transcription_start_site | + | 24663  | 24663  | -1483 | 4621 | AN10491 |
| 1788 | CONTIG64 | 84676  | 84960  | 1.46 | 1.57E-02 | transcription_start_site | - | 80892  | 80892  | -3926 | 4622 | AN10492 |
| 1788 | CONTIG64 | 84676  | 84960  | 1.46 | 1.57E-02 | transcription_start_site | - | 80763  | 80763  | -4055 | 4623 | AN10492 |
| 2521 | CONTIG65 | 53637  | 54056  | 1.19 | 5.88E-02 | transcription_start_site | + | 53886  | 53886  | -39   | 4626 | AN10494 |
| 2521 | CONTIG65 | 53637  | 54056  | 1.19 | 5.88E-02 | transcription_start_site | + | 54787  | 54787  | -940  | 4627 | AN10494 |
| 2936 | CONTIG65 | 49365  | 49634  | 0.98 | 1.44E-01 | transcription_start_site | + | 53886  | 53886  | -4386 | 4626 | AN10494 |
| 2522 | CONTIG65 | 201680 | 201965 | 1.19 | 5.88E-02 | transcription_start_site | + | 202083 | 202083 | -260  | 4631 | AN10496 |
| 2522 | CONTIG65 | 201680 | 201965 | 1.19 | 5.88E-02 | transcription_start_site | + | 202309 | 202309 | -486  | 4632 | AN10496 |
| 2522 | CONTIG65 | 201680 | 201965 | 1.19 | 5.88E-02 | transcription_start_site | + | 202373 | 202373 | -550  | 4633 | AN10496 |
| 2522 | CONTIG65 | 201680 | 201965 | 1.19 | 5.88E-02 | transcription_start_site | + | 202451 | 202451 | -628  | 4634 | AN10496 |
| 2522 | CONTIG65 | 201680 | 201965 | 1.19 | 5.88E-02 | transcription_start_site | + | 202649 | 202649 | -826  | 4635 | AN10496 |
| 2522 | CONTIG65 | 201680 | 201965 | 1.19 | 5.88E-02 | transcription_start_site | + | 203012 | 203012 | -1189 | 4636 | AN10496 |
| 2522 | CONTIG65 | 201680 | 201965 | 1.19 | 5.88E-02 | transcription_start_site | + | 203202 | 203202 | -1379 | 4637 | AN10496 |
| 2522 | CONTIG65 | 201680 | 201965 | 1.19 | 5.88E-02 | transcription_start_site | + | 203319 | 203319 | -1496 | 4638 | AN10496 |
| 2399 | CONTIG65 | 249682 | 249951 | 1.23 | 5.22E-02 | transcription_start_site | + | 250162 | 250162 | -345  | 4644 | AN10497 |
| 2820 | CONTIG65 | 29481  | 30289  | 1.05 | 5.82E-02 | transcription_start_site | - | 30100  | 30100  | 215   | 4646 | AN10499 |
| 2936 | CONTIG65 | 49365  | 49634  | 0.98 | 1.44E-01 | transcription_start_site | + | 50385  | 50385  | -885  | 4658 | AN10502 |
| 2936 | CONTIG65 | 49365  | 49634  | 0.98 | 1.44E-01 | transcription_start_site | + | 50560  | 50560  | -1060 | 4659 | AN10502 |
| 2936 | CONTIG65 | 49365  | 49634  | 0.98 | 1.44E-01 | transcription_start_site | + | 50936  | 50936  | -1436 | 4660 | AN10502 |
| 2936 | CONTIG65 | 49365  | 49634  | 0.98 | 1.44E-01 | transcription_start_site | + | 51071  | 51071  | -1571 | 4661 | AN10502 |
| 2936 | CONTIG65 | 49365  | 49634  | 0.98 | 1.44E-01 | transcription_start_site | + | 51390  | 51390  | -1890 | 4662 | AN10502 |
| 2936 | CONTIG65 | 49365  | 49634  | 0.98 | 1.44E-01 | transcription_start_site | + | 51889  | 51889  | -2389 | 4663 | AN10502 |
| 2522 | CONTIG65 | 201680 | 201965 | 1.19 | 5.88E-02 | transcription_start_site | + | 204308 | 204308 | -2485 | 4670 | AN10504 |
| 2522 | CONTIG65 | 201680 | 201965 | 1.19 | 5.88E-02 | transcription_start_site | + | 204939 | 204939 | -3116 | 4671 | AN10504 |
| 2820 | CONTIG65 | 29481  | 30289  | 1.05 | 5.82E-02 | transcription_start_site | - | 28645  | 28645  | -1240 | 4672 | AN10505 |
| 2820 | CONTIG65 | 29481  | 30289  | 1.05 | 5.82E-02 | transcription_start_site | - | 28340  | 28340  | -1545 | 4673 | AN10505 |
| 2820 | CONTIG65 | 29481  | 30289  | 1.05 | 5.82E-02 | transcription_start_site | - | 28183  | 28183  | -1702 | 4674 | AN10505 |
| 2820 | CONTIG65 | 29481  | 30289  | 1.05 | 5.82E-02 | transcription_start_site | - | 27460  | 27460  | -2425 | 4675 | AN10505 |
| 1696 | CONTIG67 | 117693 | 117957 | 1.5  | 5.22E-02 | transcription_start_site | + | 119749 | 119749 | -1924 | 4676 | AN10506 |
| 1696 | CONTIG67 | 117693 | 117957 | 1.5  | 5.22E-02 | transcription_start_site | + | 119842 | 119842 | -2017 | 4677 | AN10506 |
| 1696 | CONTIG67 | 117693 | 117957 | 1.5  | 5.22E-02 | transcription_start_site | + | 120311 | 120311 | -2486 | 4678 | AN10506 |

|      |          |        |        |      |          |                          |   |        |        |       |      |         |
|------|----------|--------|--------|------|----------|--------------------------|---|--------|--------|-------|------|---------|
| 1696 | CONTIG67 | 117693 | 117957 | 1.5  | 5.22E-02 | transcription_start_site | + | 120661 | 120661 | -2836 | 4679 | AN10506 |
| 1696 | CONTIG67 | 117693 | 117957 | 1.5  | 5.22E-02 | transcription_start_site | + | 121185 | 121185 | -3360 | 4680 | AN10506 |
| 1696 | CONTIG67 | 117693 | 117957 | 1.5  | 5.22E-02 | transcription_start_site | + | 121358 | 121358 | -3533 | 4681 | AN10506 |
| 1696 | CONTIG67 | 117693 | 117957 | 1.5  | 5.22E-02 | transcription_start_site | + | 118448 | 118448 | -623  | 4682 | AN10507 |
| 2751 | CONTIG67 | 237542 | 237806 | 1.1  | 1.93E-01 | transcription_start_site | + | 242010 | 242010 | -4336 | 4683 | AN10508 |
| 2751 | CONTIG67 | 237542 | 237806 | 1.1  | 1.93E-01 | transcription_start_site | + | 242127 | 242127 | -4453 | 4684 | AN10508 |
| 2751 | CONTIG67 | 237542 | 237806 | 1.1  | 1.93E-01 | transcription_start_site | + | 242303 | 242303 | -4629 | 4685 | AN10508 |
| 745  | CONTIG67 | 2851   | 3200   | 2.16 | 3.61E-03 | transcription_start_site | + | 5874   | 5874   | -2848 | 4686 | AN10509 |
| 478  | CONTIG67 | 212930 | 213584 | 2.47 | 0.00E+00 | transcription_start_site | + | 217660 | 217660 | -4403 | 4687 | AN10510 |
| 478  | CONTIG67 | 212930 | 213584 | 2.47 | 0.00E+00 | transcription_start_site | + | 217795 | 217795 | -4538 | 4688 | AN10510 |
| 478  | CONTIG67 | 212930 | 213584 | 2.47 | 0.00E+00 | transcription_start_site | + | 218241 | 218241 | -4984 | 4689 | AN10510 |
| 478  | CONTIG67 | 212930 | 213584 | 2.47 | 0.00E+00 | transcription_start_site | + | 218370 | 218370 | -5113 | 4690 | AN10510 |
| 478  | CONTIG67 | 212930 | 213584 | 2.47 | 0.00E+00 | transcription_start_site | + | 218449 | 218449 | -5192 | 4691 | AN10510 |
| 2535 | CONTIG67 | 214576 | 214935 | 1.19 | 1.44E-01 | transcription_start_site | + | 217660 | 217660 | -2904 | 4687 | AN10510 |
| 2535 | CONTIG67 | 214576 | 214935 | 1.19 | 1.44E-01 | transcription_start_site | + | 217795 | 217795 | -3039 | 4688 | AN10510 |
| 2535 | CONTIG67 | 214576 | 214935 | 1.19 | 1.44E-01 | transcription_start_site | + | 218241 | 218241 | -3485 | 4689 | AN10510 |
| 2535 | CONTIG67 | 214576 | 214935 | 1.19 | 1.44E-01 | transcription_start_site | + | 218370 | 218370 | -3614 | 4690 | AN10510 |
| 2535 | CONTIG67 | 214576 | 214935 | 1.19 | 1.44E-01 | transcription_start_site | + | 218449 | 218449 | -3693 | 4691 | AN10510 |
| 1694 | CONTIG67 | 51090  | 51970  | 1.5  | 5.22E-02 | transcription_start_site | + | 51777  | 51777  | -247  | 4692 | AN10511 |
| 1694 | CONTIG67 | 51090  | 51970  | 1.5  | 5.22E-02 | transcription_start_site | + | 52619  | 52619  | -1089 | 4693 | AN10511 |
| 2724 | CONTIG68 | 17253  | 18292  | 1.11 | 1.11E-01 | transcription_start_site | - | 18894  | 18894  | 1121  | 4696 | AN10512 |
| 2132 | CONTIG68 | 36903  | 37262  | 1.32 | 6.16E-02 | transcription_start_site | + | 36691  | 36691  | 391   | 4705 | AN10514 |
| 2132 | CONTIG68 | 36903  | 37262  | 1.32 | 6.16E-02 | transcription_start_site | + | 36432  | 36432  | 650   | 4704 | AN10514 |
| 1811 | CONTIG68 | 72757  | 73027  | 1.45 | 5.22E-02 | transcription_start_site | + | 73062  | 73062  | -170  | 4706 | AN10515 |
| 1811 | CONTIG68 | 72757  | 73027  | 1.45 | 5.22E-02 | transcription_start_site | + | 74015  | 74015  | -1123 | 4707 | AN10515 |
| 1811 | CONTIG68 | 72757  | 73027  | 1.45 | 5.22E-02 | transcription_start_site | + | 74162  | 74162  | -1270 | 4708 | AN10515 |
| 2800 | CONTIG68 | 109132 | 109420 | 1.07 | 1.93E-01 | transcription_start_site | + | 113627 | 113627 | -4351 | 4712 | AN10517 |
| 2800 | CONTIG68 | 109132 | 109420 | 1.07 | 1.93E-01 | transcription_start_site | + | 113830 | 113830 | -4554 | 4713 | AN10517 |
| 2800 | CONTIG68 | 109132 | 109420 | 1.07 | 1.93E-01 | transcription_start_site | + | 113921 | 113921 | -4645 | 4714 | AN10517 |
| 32   | CONTIG16 | 24243  | 24657  | 3.53 | 0.00E+00 | transcription_start_site | + | 25596  | 25596  | -1146 | 4722 | AN1052  |
| 32   | CONTIG16 | 24243  | 24657  | 3.53 | 0.00E+00 | transcription_start_site | + | 25697  | 25697  | -1247 | 4723 | AN1052  |
| 379  | CONTIG16 | 22068  | 22477  | 2.63 | 0.00E+00 | transcription_start_site | + | 25596  | 25596  | -3323 | 4722 | AN1052  |
| 379  | CONTIG16 | 22068  | 22477  | 2.63 | 0.00E+00 | transcription_start_site | + | 25697  | 25697  | -3424 | 4723 | AN1052  |
| 710  | CONTIG16 | 26343  | 26607  | 2.19 | 8.81E-03 | transcription_start_site | + | 25697  | 25697  | 778   | 4723 | AN1052  |
| 710  | CONTIG16 | 26343  | 26607  | 2.19 | 8.81E-03 | transcription_start_site | + | 25596  | 25596  | 879   | 4722 | AN1052  |
| 2724 | CONTIG68 | 17253  | 18292  | 1.11 | 1.11E-01 | transcription_start_site | - | 18391  | 18391  | 618   | 4724 | AN10520 |
| 1811 | CONTIG68 | 72757  | 73027  | 1.45 | 5.22E-02 | transcription_start_site | + | 76723  | 76723  | -3831 | 4725 | AN10521 |
| 1811 | CONTIG68 | 72757  | 73027  | 1.45 | 5.22E-02 | transcription_start_site | + | 76841  | 76841  | -3949 | 4726 | AN10521 |
| 857  | CONTIG68 | 54453  | 54727  | 2.05 | 4.61E-03 | transcription_start_site | - | 52112  | 52112  | -2478 | 4733 | AN10525 |
| 857  | CONTIG68 | 54453  | 54727  | 2.05 | 4.61E-03 | transcription_start_site | - | 51960  | 51960  | -2630 | 4734 | AN10525 |
| 857  | CONTIG68 | 54453  | 54727  | 2.05 | 4.61E-03 | transcription_start_site | - | 51716  | 51716  | -2874 | 4735 | AN10525 |
| 2733 | CONTIG68 | 50793  | 51074  | 1.11 | 1.66E-01 | transcription_start_site | - | 51716  | 51716  | 782   | 4735 | AN10525 |
| 2733 | CONTIG68 | 50793  | 51074  | 1.11 | 1.66E-01 | transcription_start_site | - | 51960  | 51960  | 1026  | 4734 | AN10525 |
| 401  | CONTIG68 | 222980 | 223329 | 2.6  | 2.39E-04 | transcription_start_site | + | 223691 | 223691 | -536  | 4754 | AN10528 |
| 1801 | CONTIG68 | 223965 | 224902 | 1.45 | 5.26E-03 | transcription_start_site | + | 223691 | 223691 | 742   | 4754 | AN10528 |
| 2375 | CONTIG68 | 221115 | 221474 | 1.24 | 9.26E-02 | transcription_start_site | + | 223691 | 223691 | -2396 | 4754 | AN10528 |
| 32   | CONTIG16 | 24243  | 24657  | 3.53 | 0.00E+00 | transcription_start_site | + | 28152  | 28152  | -3702 | 4756 | AN1053  |
| 32   | CONTIG16 | 24243  | 24657  | 3.53 | 0.00E+00 | transcription_start_site | + | 28259  | 28259  | -3809 | 4757 | AN1053  |
| 710  | CONTIG16 | 26343  | 26607  | 2.19 | 8.81E-03 | transcription_start_site | + | 28152  | 28152  | -1677 | 4756 | AN1053  |
| 710  | CONTIG16 | 26343  | 26607  | 2.19 | 8.81E-03 | transcription_start_site | + | 28259  | 28259  | -1784 | 4757 | AN1053  |
| 2132 | CONTIG68 | 36903  | 37262  | 1.32 | 6.16E-02 | transcription_start_site | + | 37734  | 37734  | -651  | 4758 | AN10530 |
| 2132 | CONTIG68 | 36903  | 37262  | 1.32 | 6.16E-02 | transcription_start_site | + | 37970  | 37970  | -887  | 4759 | AN10530 |
| 702  | CONTIG69 | 33091  | 33501  | 2.19 | 1.54E-03 | transcription_start_site | - | 32804  | 32804  | -492  | 4763 | AN10533 |
| 702  | CONTIG69 | 33091  | 33501  | 2.19 | 1.54E-03 | transcription_start_site | - | 32726  | 32726  | -570  | 4764 | AN10533 |
| 702  | CONTIG69 | 33091  | 33501  | 2.19 | 1.54E-03 | transcription_start_site | - | 29964  | 29964  | -3332 | 4765 | AN10533 |
| 702  | CONTIG69 | 33091  | 33501  | 2.19 | 1.54E-03 | transcription_start_site | - | 29656  | 29656  | -3640 | 4766 | AN10534 |
| 702  | CONTIG69 | 33091  | 33501  | 2.19 | 1.54E-03 | transcription_start_site | - | 29474  | 29474  | -3822 | 4767 | AN10534 |

|      |          |        |        |      |          |                          |   |        |        |       |      |         |
|------|----------|--------|--------|------|----------|--------------------------|---|--------|--------|-------|------|---------|
| 347  | CONTIG71 | 2102   | 2455   | 2.69 | 1.57E-02 | transcription_start_site | + | 2304   | 2304   | -25   | 4770 | AN10537 |
| 2429 | CONTIG74 | 6610   | 7329   | 1.22 | 3.08E-02 | transcription_start_site | - | 6529   | 6529   | -440  | 4771 | AN10539 |
| 2429 | CONTIG74 | 6610   | 7329   | 1.22 | 3.08E-02 | transcription_start_site | - | 6229   | 6229   | -740  | 4772 | AN10539 |
| 2860 | CONTIG74 | 8570   | 8836   | 1.03 | 8.01E-02 | transcription_start_site | - | 6529   | 6529   | -2174 | 4771 | AN10539 |
| 2860 | CONTIG74 | 8570   | 8836   | 1.03 | 8.01E-02 | transcription_start_site | - | 6229   | 6229   | -2474 | 4772 | AN10539 |
| 1093 | CONTIG16 | 33833  | 34342  | 1.84 | 3.08E-02 | transcription_start_site | - | 32252  | 32252  | -1835 | 4773 | AN1054  |
| 1093 | CONTIG16 | 33833  | 34342  | 1.84 | 3.08E-02 | transcription_start_site | - | 32010  | 32010  | -2077 | 4774 | AN1054  |
| 1093 | CONTIG16 | 33833  | 34342  | 1.84 | 3.08E-02 | transcription_start_site | - | 31834  | 31834  | -2253 | 4775 | AN1054  |
| 1093 | CONTIG16 | 33833  | 34342  | 1.84 | 3.08E-02 | transcription_start_site | - | 31650  | 31650  | -2437 | 4776 | AN1054  |
| 1093 | CONTIG16 | 33833  | 34342  | 1.84 | 3.08E-02 | transcription_start_site | - | 31531  | 31531  | -2556 | 4777 | AN1054  |
| 1093 | CONTIG16 | 33833  | 34342  | 1.84 | 3.08E-02 | transcription_start_site | - | 30837  | 30837  | -3250 | 4778 | AN1054  |
| 1974 | CONTIG75 | 98405  | 100939 | 1.38 | 3.64E-02 | transcription_start_site | - | 97484  | 97484  | -2188 | 4790 | AN10543 |
| 1974 | CONTIG75 | 98405  | 100939 | 1.38 | 3.64E-02 | transcription_start_site | - | 97260  | 97260  | -2412 | 4791 | AN10543 |
| 1974 | CONTIG75 | 98405  | 100939 | 1.38 | 3.64E-02 | transcription_start_site | - | 96625  | 96625  | -3047 | 4792 | AN10543 |
| 1974 | CONTIG75 | 98405  | 100939 | 1.38 | 3.64E-02 | transcription_start_site | - | 95557  | 95557  | -4115 | 4793 | AN10543 |
| 1402 | CONTIG75 | 139580 | 139929 | 1.63 | 3.99E-02 | transcription_start_site | + | 140128 | 140128 | -373  | 4794 | AN10544 |
| 1261 | CONTIG75 | 143865 | 144129 | 1.72 | 4.36E-02 | transcription_start_site | + | 143769 | 143769 | 228   | 4804 | AN10548 |
| 1261 | CONTIG75 | 143865 | 144129 | 1.72 | 4.36E-02 | transcription_start_site | + | 143546 | 143546 | 451   | 4803 | AN10548 |
| 1261 | CONTIG75 | 143865 | 144129 | 1.72 | 4.36E-02 | transcription_start_site | + | 144925 | 144925 | -928  | 4805 | AN10548 |
| 1261 | CONTIG75 | 143865 | 144129 | 1.72 | 4.36E-02 | transcription_start_site | + | 143028 | 143028 | 969   | 4802 | AN10548 |
| 1402 | CONTIG75 | 139580 | 139929 | 1.63 | 3.99E-02 | transcription_start_site | + | 142724 | 142724 | -2969 | 4801 | AN10548 |
| 1402 | CONTIG75 | 139580 | 139929 | 1.63 | 3.99E-02 | transcription_start_site | + | 143028 | 143028 | -3273 | 4802 | AN10548 |
| 1402 | CONTIG75 | 139580 | 139929 | 1.63 | 3.99E-02 | transcription_start_site | + | 143546 | 143546 | -3791 | 4803 | AN10548 |
| 1402 | CONTIG75 | 139580 | 139929 | 1.63 | 3.99E-02 | transcription_start_site | + | 143769 | 143769 | -4014 | 4804 | AN10548 |
| 1402 | CONTIG75 | 139580 | 139929 | 1.63 | 3.99E-02 | transcription_start_site | + | 144925 | 144925 | -5170 | 4805 | AN10548 |
| 1261 | CONTIG75 | 143865 | 144129 | 1.72 | 4.36E-02 | transcription_start_site | + | 146341 | 146341 | -2344 | 4806 | AN10549 |
| 1093 | CONTIG16 | 33833  | 34342  | 1.84 | 3.08E-02 | transcription_start_site | - | 34426  | 34426  | 338   | 4810 | AN1055  |
| 1093 | CONTIG16 | 33833  | 34342  | 1.84 | 3.08E-02 | transcription_start_site | - | 34894  | 34894  | 806   | 4809 | AN1055  |
| 1093 | CONTIG16 | 33833  | 34342  | 1.84 | 3.08E-02 | transcription_start_site | - | 35009  | 35009  | 921   | 4808 | AN1055  |
| 1093 | CONTIG16 | 33833  | 34342  | 1.84 | 3.08E-02 | transcription_start_site | - | 35086  | 35086  | 998   | 4807 | AN1055  |
| 1974 | CONTIG75 | 98405  | 100939 | 1.38 | 3.64E-02 | transcription_start_site | - | 99135  | 99135  | -537  | 4812 | AN10550 |
| 1974 | CONTIG75 | 98405  | 100939 | 1.38 | 3.64E-02 | transcription_start_site | - | 100411 | 100411 | 739   | 4811 | AN10550 |
| 1746 | CONTIG76 | 150839 | 151253 | 1.48 | 4.42E-02 | transcription_start_site | - | 146448 | 146448 | -4598 | 4822 | AN10552 |
| 1746 | CONTIG76 | 150839 | 151253 | 1.48 | 4.42E-02 | transcription_start_site | - | 146090 | 146090 | -4956 | 4823 | AN10552 |
| 1746 | CONTIG76 | 150839 | 151253 | 1.48 | 4.42E-02 | transcription_start_site | - | 145975 | 145975 | -5071 | 4824 | AN10552 |
| 1943 | CONTIG76 | 147019 | 147653 | 1.39 | 7.51E-02 | transcription_start_site | - | 146448 | 146448 | -888  | 4822 | AN10552 |
| 1943 | CONTIG76 | 147019 | 147653 | 1.39 | 7.51E-02 | transcription_start_site | - | 146090 | 146090 | -1246 | 4823 | AN10552 |
| 1943 | CONTIG76 | 147019 | 147653 | 1.39 | 7.51E-02 | transcription_start_site | - | 145975 | 145975 | -1361 | 4824 | AN10552 |
| 1943 | CONTIG76 | 147019 | 147653 | 1.39 | 7.51E-02 | transcription_start_site | - | 145627 | 145627 | -1709 | 4825 | AN10552 |
| 1943 | CONTIG76 | 147019 | 147653 | 1.39 | 7.51E-02 | transcription_start_site | - | 145394 | 145394 | -1942 | 4826 | AN10552 |
| 1943 | CONTIG76 | 147019 | 147653 | 1.39 | 7.51E-02 | transcription_start_site | - | 144650 | 144650 | -2686 | 4831 | AN10554 |
| 1943 | CONTIG76 | 147019 | 147653 | 1.39 | 7.51E-02 | transcription_start_site | - | 144463 | 144463 | -2873 | 4832 | AN10554 |
| 1943 | CONTIG76 | 147019 | 147653 | 1.39 | 7.51E-02 | transcription_start_site | - | 144134 | 144134 | -3202 | 4833 | AN10554 |
| 1943 | CONTIG76 | 147019 | 147653 | 1.39 | 7.51E-02 | transcription_start_site | - | 143839 | 143839 | -3497 | 4834 | AN10554 |
| 1825 | CONTIG77 | 35402  | 35704  | 1.44 | 4.36E-02 | transcription_start_site | + | 39260  | 39260  | -3707 | 4835 | AN10555 |
| 1305 | CONTIG77 | 44041  | 44402  | 1.69 | 1.57E-02 | transcription_start_site | + | 48169  | 48169  | -3947 | 4836 | AN10556 |
| 1305 | CONTIG77 | 44041  | 44402  | 1.69 | 1.57E-02 | transcription_start_site | + | 48982  | 48982  | -4760 | 4837 | AN10556 |
| 1305 | CONTIG77 | 44041  | 44402  | 1.69 | 1.57E-02 | transcription_start_site | + | 49219  | 49219  | -4997 | 4838 | AN10556 |
| 2727 | CONTIG77 | 46881  | 47245  | 1.11 | 1.44E-01 | transcription_start_site | + | 48169  | 48169  | -1106 | 4836 | AN10556 |
| 2727 | CONTIG77 | 46881  | 47245  | 1.11 | 1.44E-01 | transcription_start_site | + | 48982  | 48982  | -1919 | 4837 | AN10556 |
| 2727 | CONTIG77 | 46881  | 47245  | 1.11 | 1.44E-01 | transcription_start_site | + | 49219  | 49219  | -2156 | 4838 | AN10556 |
| 2727 | CONTIG77 | 46881  | 47245  | 1.11 | 1.44E-01 | transcription_start_site | + | 49742  | 49742  | -2679 | 4839 | AN10556 |
| 2727 | CONTIG77 | 46881  | 47245  | 1.11 | 1.44E-01 | transcription_start_site | + | 51535  | 51535  | -4472 | 4840 | AN10556 |
| 757  | CONTIG77 | 126096 | 126590 | 2.14 | 1.80E-03 | transcription_start_site | - | 126524 | 126524 | 181   | 4842 | AN10557 |
| 757  | CONTIG77 | 126096 | 126590 | 2.14 | 1.80E-03 | transcription_start_site | - | 126794 | 126794 | 451   | 4841 | AN10557 |
| 2725 | CONTIG77 | 127430 | 128100 | 1.11 | 1.33E-01 | transcription_start_site | - | 126794 | 126794 | -971  | 4841 | AN10557 |
| 2725 | CONTIG77 | 127430 | 128100 | 1.11 | 1.33E-01 | transcription_start_site | - | 126524 | 126524 | -1241 | 4842 | AN10557 |

|      |          |        |        |      |          |                          |   |        |        |       |      |         |
|------|----------|--------|--------|------|----------|--------------------------|---|--------|--------|-------|------|---------|
| 1825 | CONTIG77 | 35402  | 35704  | 1.44 | 4.36E-02 | transcription_start_site | + | 37026  | 37026  | -1473 | 4843 | AN10558 |
| 2727 | CONTIG77 | 46881  | 47245  | 1.11 | 1.44E-01 | transcription_start_site | + | 52031  | 52031  | -4968 | 4844 | AN10559 |
| 2727 | CONTIG77 | 46881  | 47245  | 1.11 | 1.44E-01 | transcription_start_site | + | 52208  | 52208  | -5145 | 4845 | AN10559 |
| 2728 | CONTIG77 | 52955  | 53304  | 1.11 | 1.44E-01 | transcription_start_site | + | 52208  | 52208  | 921   | 4845 | AN10559 |
| 2728 | CONTIG77 | 52955  | 53304  | 1.11 | 1.44E-01 | transcription_start_site | + | 52031  | 52031  | 1098  | 4844 | AN10559 |
| 1093 | CONTIG16 | 33833  | 34342  | 1.84 | 3.08E-02 | transcription_start_site | + | 35431  | 35431  | -1343 | 4846 | AN10556 |
| 1093 | CONTIG16 | 33833  | 34342  | 1.84 | 3.08E-02 | transcription_start_site | + | 35521  | 35521  | -1433 | 4847 | AN10556 |
| 1093 | CONTIG16 | 33833  | 34342  | 1.84 | 3.08E-02 | transcription_start_site | + | 35749  | 35749  | -1661 | 4848 | AN10556 |
| 1093 | CONTIG16 | 33833  | 34342  | 1.84 | 3.08E-02 | transcription_start_site | + | 36471  | 36471  | -2383 | 4849 | AN10556 |
| 757  | CONTIG77 | 126096 | 126590 | 2.14 | 1.80E-03 | transcription_start_site | - | 122968 | 122968 | -3375 | 4850 | AN10560 |
| 757  | CONTIG77 | 126096 | 126590 | 2.14 | 1.80E-03 | transcription_start_site | - | 122476 | 122476 | -3867 | 4851 | AN10560 |
| 757  | CONTIG77 | 126096 | 126590 | 2.14 | 1.80E-03 | transcription_start_site | - | 121883 | 121883 | -4460 | 4852 | AN10560 |
| 757  | CONTIG77 | 126096 | 126590 | 2.14 | 1.80E-03 | transcription_start_site | - | 121781 | 121781 | -4562 | 4853 | AN10560 |
| 757  | CONTIG77 | 126096 | 126590 | 2.14 | 1.80E-03 | transcription_start_site | - | 121682 | 121682 | -4661 | 4854 | AN10560 |
| 2725 | CONTIG77 | 127430 | 128100 | 1.11 | 1.33E-01 | transcription_start_site | - | 122968 | 122968 | -4797 | 4850 | AN10560 |
| 2725 | CONTIG77 | 127430 | 128100 | 1.11 | 1.33E-01 | transcription_start_site | - | 122476 | 122476 | -5289 | 4851 | AN10560 |
| 73   | CONTIG78 | 11568  | 12502  | 3.31 | 0.00E+00 | transcription_start_site | + | 15572  | 15572  | -3537 | 4855 | AN10561 |
| 73   | CONTIG78 | 11568  | 12502  | 3.31 | 0.00E+00 | transcription_start_site | + | 15692  | 15692  | -3657 | 4856 | AN10561 |
| 73   | CONTIG78 | 11568  | 12502  | 3.31 | 0.00E+00 | transcription_start_site | + | 16148  | 16148  | -4113 | 4857 | AN10561 |
| 73   | CONTIG78 | 11568  | 12502  | 3.31 | 0.00E+00 | transcription_start_site | + | 16243  | 16243  | -4208 | 4858 | AN10561 |
| 885  | CONTIG78 | 10593  | 10927  | 2.01 | 7.85E-03 | transcription_start_site | + | 15572  | 15572  | -4812 | 4855 | AN10561 |
| 885  | CONTIG78 | 10593  | 10927  | 2.01 | 7.85E-03 | transcription_start_site | + | 15692  | 15692  | -4932 | 4856 | AN10561 |
| 1459 | CONTIG78 | 14935  | 15371  | 1.61 | 3.70E-02 | transcription_start_site | + | 15572  | 15572  | -419  | 4855 | AN10561 |
| 1459 | CONTIG78 | 14935  | 15371  | 1.61 | 3.70E-02 | transcription_start_site | + | 15692  | 15692  | -539  | 4856 | AN10561 |
| 1459 | CONTIG78 | 14935  | 15371  | 1.61 | 3.70E-02 | transcription_start_site | + | 16148  | 16148  | -995  | 4857 | AN10561 |
| 1459 | CONTIG78 | 14935  | 15371  | 1.61 | 3.70E-02 | transcription_start_site | + | 16243  | 16243  | -1090 | 4858 | AN10561 |
| 123  | CONTIG78 | 303093 | 303362 | 3.13 | 0.00E+00 | transcription_start_site | + | 306056 | 306056 | -2828 | 4868 | AN10565 |
| 123  | CONTIG78 | 303093 | 303362 | 3.13 | 0.00E+00 | transcription_start_site | + | 306850 | 306850 | -3622 | 4869 | AN10565 |
| 1641 | CONTIG78 | 302258 | 302907 | 1.52 | 5.22E-02 | transcription_start_site | + | 306056 | 306056 | -3473 | 4868 | AN10565 |
| 1641 | CONTIG78 | 302258 | 302907 | 1.52 | 5.22E-02 | transcription_start_site | + | 306850 | 306850 | -4267 | 4869 | AN10565 |
| 73   | CONTIG78 | 11568  | 12502  | 3.31 | 0.00E+00 | transcription_start_site | + | 16636  | 16636  | -4601 | 4874 | AN10568 |
| 73   | CONTIG78 | 11568  | 12502  | 3.31 | 0.00E+00 | transcription_start_site | + | 17156  | 17156  | -5121 | 4875 | AN10568 |
| 73   | CONTIG78 | 11568  | 12502  | 3.31 | 0.00E+00 | transcription_start_site | + | 17265  | 17265  | -5230 | 4876 | AN10568 |
| 1459 | CONTIG78 | 14935  | 15371  | 1.61 | 3.70E-02 | transcription_start_site | + | 16636  | 16636  | -1483 | 4874 | AN10568 |
| 1459 | CONTIG78 | 14935  | 15371  | 1.61 | 3.70E-02 | transcription_start_site | + | 17156  | 17156  | -2003 | 4875 | AN10568 |
| 1459 | CONTIG78 | 14935  | 15371  | 1.61 | 3.70E-02 | transcription_start_site | + | 17265  | 17265  | -2112 | 4876 | AN10568 |
| 1093 | CONTIG16 | 33833  | 34342  | 1.84 | 3.08E-02 | transcription_start_site | + | 37202  | 37202  | -3114 | 4879 | AN1057  |
| 1093 | CONTIG16 | 33833  | 34342  | 1.84 | 3.08E-02 | transcription_start_site | + | 37360  | 37360  | -3272 | 4880 | AN1057  |
| 1093 | CONTIG16 | 33833  | 34342  | 1.84 | 3.08E-02 | transcription_start_site | + | 37533  | 37533  | -3445 | 4881 | AN1057  |
| 1093 | CONTIG16 | 33833  | 34342  | 1.84 | 3.08E-02 | transcription_start_site | + | 39092  | 39092  | -5004 | 4882 | AN1057  |
| 123  | CONTIG78 | 303093 | 303362 | 3.13 | 0.00E+00 | transcription_start_site | + | 307219 | 307219 | -3991 | 4883 | AN10570 |
| 123  | CONTIG78 | 303093 | 303362 | 3.13 | 0.00E+00 | transcription_start_site | + | 307488 | 307488 | -4260 | 4884 | AN10570 |
| 1641 | CONTIG78 | 302258 | 302907 | 1.52 | 5.22E-02 | transcription_start_site | + | 307219 | 307219 | -4636 | 4883 | AN10570 |
| 1641 | CONTIG78 | 302258 | 302907 | 1.52 | 5.22E-02 | transcription_start_site | + | 307488 | 307488 | -4905 | 4884 | AN10570 |
| 1807 | CONTIG79 | 123826 | 124100 | 1.45 | 4.36E-02 | transcription_start_site | + | 125791 | 125791 | -1828 | 4887 | AN10572 |
| 1807 | CONTIG79 | 123826 | 124100 | 1.45 | 4.36E-02 | transcription_start_site | + | 126524 | 126524 | -2561 | 4888 | AN10572 |
| 2513 | CONTIG79 | 192617 | 193113 | 1.2  | 1.08E-01 | transcription_start_site | - | 188628 | 188628 | -4237 | 4892 | AN10574 |
| 2614 | CONTIG79 | 188937 | 189201 | 1.16 | 1.25E-01 | transcription_start_site | - | 188628 | 188628 | -441  | 4892 | AN10574 |
| 2614 | CONTIG79 | 188937 | 189201 | 1.16 | 1.25E-01 | transcription_start_site | - | 186028 | 186028 | -3041 | 4893 | AN10574 |
| 2614 | CONTIG79 | 188937 | 189201 | 1.16 | 1.25E-01 | transcription_start_site | - | 185751 | 185751 | -3318 | 4894 | AN10574 |
| 1807 | CONTIG79 | 123826 | 124100 | 1.45 | 4.36E-02 | transcription_start_site | + | 124429 | 124429 | -466  | 4895 | AN10575 |
| 2358 | CONTIG79 | 246    | 500    | 1.25 | 9.24E-02 | transcription_start_site | + | 116    | 116    | 257   | 4898 | AN10577 |
| 125  | CONTIG16 | 45153  | 45742  | 3.13 | 0.00E+00 | transcription_start_site | + | 44636  | 44636  | 811   | 4908 | AN1058  |
| 125  | CONTIG16 | 45153  | 45742  | 3.13 | 0.00E+00 | transcription_start_site | + | 44293  | 44293  | 1154  | 4907 | AN1058  |
| 471  | CONTIG16 | 41778  | 42652  | 2.48 | 3.03E-03 | transcription_start_site | + | 43649  | 43649  | -1434 | 4906 | AN1058  |
| 471  | CONTIG16 | 41778  | 42652  | 2.48 | 3.03E-03 | transcription_start_site | + | 44293  | 44293  | -2078 | 4907 | AN1058  |
| 471  | CONTIG16 | 41778  | 42652  | 2.48 | 3.03E-03 | transcription_start_site | + | 44636  | 44636  | -2421 | 4908 | AN1058  |



|      |          |        |        |      |          |                          |   |        |        |       |      |         |
|------|----------|--------|--------|------|----------|--------------------------|---|--------|--------|-------|------|---------|
| 513  | CONTIG16 | 40738  | 41017  | 2.43 | 3.61E-03 | transcription_start_site | + | 43649  | 43649  | -2771 | 4906 | AN1058  |
| 513  | CONTIG16 | 40738  | 41017  | 2.43 | 3.61E-03 | transcription_start_site | + | 44293  | 44293  | -3415 | 4907 | AN1058  |
| 513  | CONTIG16 | 40738  | 41017  | 2.43 | 3.61E-03 | transcription_start_site | + | 44636  | 44636  | -3758 | 4908 | AN1058  |
| 1836 | CONTIG16 | 43743  | 44827  | 1.44 | 1.08E-01 | transcription_start_site | + | 44293  | 44293  | -8    | 4907 | AN1058  |
| 1836 | CONTIG16 | 43743  | 44827  | 1.44 | 1.08E-01 | transcription_start_site | + | 44636  | 44636  | -351  | 4908 | AN1058  |
| 1836 | CONTIG16 | 43743  | 44827  | 1.44 | 1.08E-01 | transcription_start_site | + | 43649  | 43649  | 636   | 4906 | AN1058  |
| 2057 | CONTIG80 | 295363 | 296007 | 1.35 | 8.36E-02 | transcription_start_site | - | 292807 | 292807 | -2878 | 4919 | AN10583 |
| 2057 | CONTIG80 | 295363 | 296007 | 1.35 | 8.36E-02 | transcription_start_site | - | 292730 | 292730 | -2955 | 4920 | AN10583 |
| 2057 | CONTIG80 | 295363 | 296007 | 1.35 | 8.36E-02 | transcription_start_site | - | 292145 | 292145 | -3540 | 4921 | AN10583 |
| 2057 | CONTIG80 | 295363 | 296007 | 1.35 | 8.36E-02 | transcription_start_site | - | 291862 | 291862 | -3823 | 4922 | AN10583 |
| 2057 | CONTIG80 | 295363 | 296007 | 1.35 | 8.36E-02 | transcription_start_site | - | 291741 | 291741 | -3944 | 4923 | AN10583 |
| 2496 | CONTIG80 | 287927 | 288292 | 1.21 | 1.66E-01 | transcription_start_site | + | 290034 | 290034 | -1924 | 4933 | AN10586 |
| 2496 | CONTIG80 | 287927 | 288292 | 1.21 | 1.66E-01 | transcription_start_site | + | 290520 | 290520 | -2410 | 4934 | AN10586 |
| 47   | CONTIG80 | 46142  | 46551  | 3.44 | 0.00E+00 | transcription_start_site | - | 46393  | 46393  | 46    | 4936 | AN10587 |
| 47   | CONTIG80 | 46142  | 46551  | 3.44 | 0.00E+00 | transcription_start_site | - | 46542  | 46542  | 195   | 4935 | AN10587 |
| 47   | CONTIG80 | 46142  | 46551  | 3.44 | 0.00E+00 | transcription_start_site | - | 46080  | 46080  | -266  | 4937 | AN10587 |
| 657  | CONTIG80 | 47107  | 47766  | 2.23 | 1.22E-03 | transcription_start_site | - | 46542  | 46542  | -894  | 4935 | AN10587 |
| 657  | CONTIG80 | 47107  | 47766  | 2.23 | 1.22E-03 | transcription_start_site | - | 46393  | 46393  | -1043 | 4936 | AN10587 |
| 657  | CONTIG80 | 47107  | 47766  | 2.23 | 1.22E-03 | transcription_start_site | - | 46080  | 46080  | -1356 | 4937 | AN10587 |
| 2180 | CONTIG80 | 44042  | 45216  | 1.3  | 6.32E-02 | transcription_start_site | - | 46080  | 46080  | 1451  | 4937 | AN10587 |
| 1719 | CONTIG80 | 81154  | 81518  | 1.49 | 5.05E-02 | transcription_start_site | - | 81687  | 81687  | 351   | 4938 | AN10588 |
| 125  | CONTIG16 | 45153  | 45742  | 3.13 | 0.00E+00 | transcription_start_site | + | 46429  | 46429  | -981  | 4941 | AN1059  |
| 125  | CONTIG16 | 45153  | 45742  | 3.13 | 0.00E+00 | transcription_start_site | + | 46870  | 46870  | -1422 | 4942 | AN1059  |
| 125  | CONTIG16 | 45153  | 45742  | 3.13 | 0.00E+00 | transcription_start_site | + | 48887  | 48887  | -3439 | 4943 | AN1059  |
| 471  | CONTIG16 | 41778  | 42652  | 2.48 | 3.03E-03 | transcription_start_site | + | 46429  | 46429  | -4214 | 4941 | AN1059  |
| 471  | CONTIG16 | 41778  | 42652  | 2.48 | 3.03E-03 | transcription_start_site | + | 46870  | 46870  | -4655 | 4942 | AN1059  |
| 1836 | CONTIG16 | 43743  | 44827  | 1.44 | 1.08E-01 | transcription_start_site | + | 46429  | 46429  | -2144 | 4941 | AN1059  |
| 1836 | CONTIG16 | 43743  | 44827  | 1.44 | 1.08E-01 | transcription_start_site | + | 46870  | 46870  | -2585 | 4942 | AN1059  |
| 1836 | CONTIG16 | 43743  | 44827  | 1.44 | 1.08E-01 | transcription_start_site | + | 48887  | 48887  | -4602 | 4943 | AN1059  |
| 2496 | CONTIG80 | 287927 | 288292 | 1.21 | 1.66E-01 | transcription_start_site | - | 289280 | 289280 | 1170  | 4946 | AN10590 |
| 1313 | CONTIG80 | 101628 | 102067 | 1.68 | 2.18E-02 | transcription_start_site | + | 103430 | 103430 | -1582 | 4948 | AN10592 |
| 2201 | CONTIG80 | 98118  | 98462  | 1.3  | 1.25E-01 | transcription_start_site | + | 103430 | 103430 | -5140 | 4948 | AN10592 |
| 764  | CONTIG80 | 334276 | 334850 | 2.14 | 6.61E-03 | transcription_start_site | + | 334488 | 334488 | 75    | 4949 | AN10593 |
| 1113 | CONTIG81 | 104938 | 105301 | 1.82 | 6.61E-03 | transcription_start_site | + | 106647 | 106647 | -1527 | 4953 | AN10595 |
| 1113 | CONTIG81 | 104938 | 105301 | 1.82 | 6.61E-03 | transcription_start_site | + | 107232 | 107232 | -2112 | 4954 | AN10595 |
| 1113 | CONTIG81 | 104938 | 105301 | 1.82 | 6.61E-03 | transcription_start_site | + | 108580 | 108580 | -3460 | 4955 | AN10595 |
| 1113 | CONTIG81 | 104938 | 105301 | 1.82 | 6.61E-03 | transcription_start_site | + | 108836 | 108836 | -3716 | 4956 | AN10595 |
| 1225 | CONTIG81 | 109593 | 110017 | 1.74 | 1.17E-03 | transcription_start_site | + | 108836 | 108836 | 969   | 4956 | AN10595 |
| 1932 | CONTIG81 | 150318 | 150957 | 1.39 | 2.64E-02 | transcription_start_site | - | 151562 | 151562 | 924   | 4963 | AN10597 |
| 1932 | CONTIG81 | 150318 | 150957 | 1.39 | 2.64E-02 | transcription_start_site | - | 151622 | 151622 | 984   | 4962 | AN10597 |
| 1932 | CONTIG81 | 150318 | 150957 | 1.39 | 2.64E-02 | transcription_start_site | - | 151804 | 151804 | 1166  | 4961 | AN10597 |
| 1113 | CONTIG81 | 104938 | 105301 | 1.82 | 6.61E-03 | transcription_start_site | + | 109942 | 109942 | -4822 | 4964 | AN10598 |
| 1225 | CONTIG81 | 109593 | 110017 | 1.74 | 1.17E-03 | transcription_start_site | + | 109942 | 109942 | -137  | 4964 | AN10598 |
| 1225 | CONTIG81 | 109593 | 110017 | 1.74 | 1.17E-03 | transcription_start_site | + | 112218 | 112218 | -2413 | 4965 | AN10598 |
| 1397 | CONTIG81 | 110413 | 110912 | 1.63 | 1.57E-02 | transcription_start_site | + | 109942 | 109942 | 720   | 4964 | AN10598 |
| 1397 | CONTIG81 | 110413 | 110912 | 1.63 | 1.57E-02 | transcription_start_site | + | 112218 | 112218 | -1555 | 4965 | AN10598 |
| 1604 | CONTIG16 | 54004  | 54353  | 1.54 | 8.01E-02 | transcription_start_site | + | 53635  | 53635  | 543   | 4974 | AN1060  |
| 1110 | CONTIG83 | 12691  | 12955  | 1.83 | 1.57E-02 | transcription_start_site | + | 13109  | 13109  | -286  | 4980 | AN10601 |
| 1110 | CONTIG83 | 12691  | 12955  | 1.83 | 1.57E-02 | transcription_start_site | + | 13347  | 13347  | -524  | 4981 | AN10601 |
| 1110 | CONTIG83 | 12691  | 12955  | 1.83 | 1.57E-02 | transcription_start_site | + | 13535  | 13535  | -712  | 4982 | AN10601 |
| 1110 | CONTIG83 | 12691  | 12955  | 1.83 | 1.57E-02 | transcription_start_site | + | 13656  | 13656  | -833  | 4983 | AN10601 |
| 1294 | CONTIG83 | 8701   | 8995   | 1.7  | 2.62E-02 | transcription_start_site | + | 13109  | 13109  | -4261 | 4980 | AN10601 |
| 1294 | CONTIG83 | 8701   | 8995   | 1.7  | 2.62E-02 | transcription_start_site | + | 13347  | 13347  | -4499 | 4981 | AN10601 |
| 1294 | CONTIG83 | 8701   | 8995   | 1.7  | 2.62E-02 | transcription_start_site | + | 13535  | 13535  | -4687 | 4982 | AN10601 |
| 1294 | CONTIG83 | 8701   | 8995   | 1.7  | 2.62E-02 | transcription_start_site | + | 13656  | 13656  | -4808 | 4983 | AN10601 |
| 1295 | CONTIG83 | 13066  | 14300  | 1.7  | 2.62E-02 | transcription_start_site | + | 13656  | 13656  | 27    | 4983 | AN10601 |
| 1295 | CONTIG83 | 13066  | 14300  | 1.7  | 2.62E-02 | transcription_start_site | + | 13535  | 13535  | 148   | 4982 | AN10601 |

|      |          |        |        |      |          |                          |   |        |        |       |      |         |
|------|----------|--------|--------|------|----------|--------------------------|---|--------|--------|-------|------|---------|
| 1295 | CONTIG83 | 13066  | 14300  | 1.7  | 2.62E-02 | transcription_start_site | + | 13347  | 13347  | 336   | 4981 | AN10601 |
| 1295 | CONTIG83 | 13066  | 14300  | 1.7  | 2.62E-02 | transcription_start_site | + | 13109  | 13109  | 574   | 4980 | AN10601 |
| 802  | CONTIG83 | 16052  | 16413  | 2.1  | 5.20E-03 | transcription_start_site | + | 16088  | 16088  | 144   | 4991 | AN10604 |
| 802  | CONTIG83 | 16052  | 16413  | 2.1  | 5.20E-03 | transcription_start_site | + | 15850  | 15850  | 382   | 4990 | AN10604 |
| 802  | CONTIG83 | 16052  | 16413  | 2.1  | 5.20E-03 | transcription_start_site | + | 15177  | 15177  | 1055  | 4989 | AN10604 |
| 1110 | CONTIG83 | 12691  | 12955  | 1.83 | 1.57E-02 | transcription_start_site | + | 14921  | 14921  | -2098 | 4988 | AN10604 |
| 1110 | CONTIG83 | 12691  | 12955  | 1.83 | 1.57E-02 | transcription_start_site | + | 15177  | 15177  | -2354 | 4989 | AN10604 |
| 1110 | CONTIG83 | 12691  | 12955  | 1.83 | 1.57E-02 | transcription_start_site | + | 15850  | 15850  | -3027 | 4990 | AN10604 |
| 1110 | CONTIG83 | 12691  | 12955  | 1.83 | 1.57E-02 | transcription_start_site | + | 16088  | 16088  | -3265 | 4991 | AN10604 |
| 1295 | CONTIG83 | 13066  | 14300  | 1.7  | 2.62E-02 | transcription_start_site | + | 14921  | 14921  | -1238 | 4988 | AN10604 |
| 1295 | CONTIG83 | 13066  | 14300  | 1.7  | 2.62E-02 | transcription_start_site | + | 15177  | 15177  | -1494 | 4989 | AN10604 |
| 1295 | CONTIG83 | 13066  | 14300  | 1.7  | 2.62E-02 | transcription_start_site | + | 15850  | 15850  | -2167 | 4990 | AN10604 |
| 1295 | CONTIG83 | 13066  | 14300  | 1.7  | 2.62E-02 | transcription_start_site | + | 16088  | 16088  | -2405 | 4991 | AN10604 |
| 802  | CONTIG83 | 16052  | 16413  | 2.1  | 5.20E-03 | transcription_start_site | + | 21287  | 21287  | -5054 | 4992 | AN10605 |
| 802  | CONTIG83 | 16052  | 16413  | 2.1  | 5.20E-03 | transcription_start_site | + | 21409  | 21409  | -5176 | 4993 | AN10605 |
| 886  | CONTIG83 | 34367  | 34631  | 2.01 | 7.85E-03 | transcription_start_site | - | 34244  | 34244  | -255  | 5000 | AN10606 |
| 886  | CONTIG83 | 34367  | 34631  | 2.01 | 7.85E-03 | transcription_start_site | - | 34110  | 34110  | -389  | 5001 | AN10606 |
| 886  | CONTIG83 | 34367  | 34631  | 2.01 | 7.85E-03 | transcription_start_site | - | 35231  | 35231  | 732   | 4999 | AN10606 |
| 886  | CONTIG83 | 34367  | 34631  | 2.01 | 7.85E-03 | transcription_start_site | - | 35423  | 35423  | 924   | 4998 | AN10606 |
| 1705 | CONTIG84 | 3090   | 3954   | 1.5  | 1.08E-01 | transcription_start_site | + | 8848   | 8848   | -5326 | 5003 | AN10608 |
| 1960 | CONTIG84 | 4070   | 4629   | 1.39 | 1.44E-01 | transcription_start_site | + | 8848   | 8848   | -4498 | 5003 | AN10608 |
| 1960 | CONTIG84 | 4070   | 4629   | 1.39 | 1.44E-01 | transcription_start_site | + | 9240   | 9240   | -4890 | 5004 | AN10608 |
| 258  | CONTIG16 | 56270  | 56697  | 2.83 | 8.69E-04 | transcription_start_site | + | 57049  | 57049  | -565  | 5006 | AN1061  |
| 258  | CONTIG16 | 56270  | 56697  | 2.83 | 8.69E-04 | transcription_start_site | + | 57231  | 57231  | -747  | 5007 | AN1061  |
| 258  | CONTIG16 | 56270  | 56697  | 2.83 | 8.69E-04 | transcription_start_site | + | 57856  | 57856  | -1372 | 5008 | AN1061  |
| 1604 | CONTIG16 | 54004  | 54353  | 1.54 | 8.01E-02 | transcription_start_site | + | 57049  | 57049  | -2870 | 5006 | AN1061  |
| 1604 | CONTIG16 | 54004  | 54353  | 1.54 | 8.01E-02 | transcription_start_site | + | 57231  | 57231  | -3052 | 5007 | AN1061  |
| 1604 | CONTIG16 | 54004  | 54353  | 1.54 | 8.01E-02 | transcription_start_site | + | 57856  | 57856  | -3677 | 5008 | AN1061  |
| 2244 | CONTIG84 | 459826 | 460255 | 1.29 | 1.79E-01 | transcription_start_site | + | 464790 | 464790 | -4749 | 5014 | AN10611 |
| 2244 | CONTIG84 | 459826 | 460255 | 1.29 | 1.79E-01 | transcription_start_site | + | 464973 | 464973 | -4932 | 5015 | AN10611 |
| 322  | CONTIG84 | 149259 | 149619 | 2.73 | 1.54E-03 | transcription_start_site | + | 153421 | 153421 | -3982 | 5028 | AN10614 |
| 322  | CONTIG84 | 149259 | 149619 | 2.73 | 1.54E-03 | transcription_start_site | + | 153699 | 153699 | -4260 | 5029 | AN10614 |
| 322  | CONTIG84 | 149259 | 149619 | 2.73 | 1.54E-03 | transcription_start_site | + | 153841 | 153841 | -4402 | 5030 | AN10614 |
| 322  | CONTIG84 | 149259 | 149619 | 2.73 | 1.54E-03 | transcription_start_site | + | 154069 | 154069 | -4630 | 5031 | AN10614 |
| 322  | CONTIG84 | 149259 | 149619 | 2.73 | 1.54E-03 | transcription_start_site | + | 154273 | 154273 | -4834 | 5032 | AN10614 |
| 1483 | CONTIG84 | 151671 | 151940 | 1.6  | 8.01E-02 | transcription_start_site | + | 153421 | 153421 | -1615 | 5028 | AN10614 |
| 1483 | CONTIG84 | 151671 | 151940 | 1.6  | 8.01E-02 | transcription_start_site | + | 153699 | 153699 | -1893 | 5029 | AN10614 |
| 1483 | CONTIG84 | 151671 | 151940 | 1.6  | 8.01E-02 | transcription_start_site | + | 153841 | 153841 | -2035 | 5030 | AN10614 |
| 1483 | CONTIG84 | 151671 | 151940 | 1.6  | 8.01E-02 | transcription_start_site | + | 154069 | 154069 | -2263 | 5031 | AN10614 |
| 1483 | CONTIG84 | 151671 | 151940 | 1.6  | 8.01E-02 | transcription_start_site | + | 154273 | 154273 | -2467 | 5032 | AN10614 |
| 1484 | CONTIG84 | 152781 | 153275 | 1.6  | 8.01E-02 | transcription_start_site | + | 153421 | 153421 | -393  | 5028 | AN10614 |
| 1484 | CONTIG84 | 152781 | 153275 | 1.6  | 8.01E-02 | transcription_start_site | + | 153699 | 153699 | -671  | 5029 | AN10614 |
| 1484 | CONTIG84 | 152781 | 153275 | 1.6  | 8.01E-02 | transcription_start_site | + | 153841 | 153841 | -813  | 5030 | AN10614 |
| 1484 | CONTIG84 | 152781 | 153275 | 1.6  | 8.01E-02 | transcription_start_site | + | 154069 | 154069 | -1041 | 5031 | AN10614 |
| 1484 | CONTIG84 | 152781 | 153275 | 1.6  | 8.01E-02 | transcription_start_site | + | 154273 | 154273 | -1245 | 5032 | AN10614 |
| 1702 | CONTIG84 | 148144 | 148718 | 1.5  | 9.26E-02 | transcription_start_site | + | 153421 | 153421 | -4990 | 5028 | AN10614 |
| 1702 | CONTIG84 | 148144 | 148718 | 1.5  | 9.26E-02 | transcription_start_site | + | 153699 | 153699 | -5268 | 5029 | AN10614 |
| 2097 | CONTIG84 | 153996 | 154485 | 1.34 | 1.66E-01 | transcription_start_site | + | 154273 | 154273 | -32   | 5032 | AN10614 |
| 2097 | CONTIG84 | 153996 | 154485 | 1.34 | 1.66E-01 | transcription_start_site | + | 154069 | 154069 | 171   | 5031 | AN10614 |
| 2097 | CONTIG84 | 153996 | 154485 | 1.34 | 1.66E-01 | transcription_start_site | + | 153841 | 153841 | 399   | 5030 | AN10614 |
| 2097 | CONTIG84 | 153996 | 154485 | 1.34 | 1.66E-01 | transcription_start_site | + | 153699 | 153699 | 541   | 5029 | AN10614 |
| 2097 | CONTIG84 | 153996 | 154485 | 1.34 | 1.66E-01 | transcription_start_site | + | 153421 | 153421 | 819   | 5028 | AN10614 |
| 1961 | CONTIG84 | 172135 | 172479 | 1.39 | 1.44E-01 | transcription_start_site | - | 167491 | 167491 | -4816 | 5033 | AN10615 |
| 1961 | CONTIG84 | 172135 | 172479 | 1.39 | 1.44E-01 | transcription_start_site | - | 167288 | 167288 | -5019 | 5034 | AN10615 |
| 1705 | CONTIG84 | 3090   | 3954   | 1.5  | 1.08E-01 | transcription_start_site | + | 3578   | 3578   | -56   | 5040 | AN10616 |
| 1705 | CONTIG84 | 3090   | 3954   | 1.5  | 1.08E-01 | transcription_start_site | + | 3711   | 3711   | -189  | 5041 | AN10616 |
| 1960 | CONTIG84 | 4070   | 4629   | 1.39 | 1.44E-01 | transcription_start_site | + | 3711   | 3711   | 638   | 5041 | AN10616 |

|               |        |        |      |          |                          |   |        |        |       |              |
|---------------|--------|--------|------|----------|--------------------------|---|--------|--------|-------|--------------|
| 1960 CONTIG84 | 4070   | 4629   | 1.39 | 1.44E-01 | transcription_start_site | + | 3578   | 3578   | 771   | 5040 AN10616 |
| 258 CONTIG16  | 56270  | 56697  | 2.83 | 8.69E-04 | transcription_start_site | + | 59434  | 59434  | -2950 | 5048 AN1062  |
| 258 CONTIG16  | 56270  | 56697  | 2.83 | 8.69E-04 | transcription_start_site | + | 59623  | 59623  | -3139 | 5049 AN1062  |
| 258 CONTIG16  | 56270  | 56697  | 2.83 | 8.69E-04 | transcription_start_site | + | 59752  | 59752  | -3268 | 5050 AN1062  |
| 258 CONTIG16  | 56270  | 56697  | 2.83 | 8.69E-04 | transcription_start_site | + | 60460  | 60460  | -3976 | 5051 AN1062  |
| 1708 CONTIG84 | 455251 | 456808 | 1.5  | 1.08E-01 | transcription_start_site | + | 460753 | 460753 | -4723 | 5055 AN10621 |
| 1708 CONTIG84 | 455251 | 456808 | 1.5  | 1.08E-01 | transcription_start_site | + | 461010 | 461010 | -4980 | 5056 AN10621 |
| 2244 CONTIG84 | 459826 | 460255 | 1.29 | 1.79E-01 | transcription_start_site | + | 460753 | 460753 | -712  | 5055 AN10621 |
| 2244 CONTIG84 | 459826 | 460255 | 1.29 | 1.79E-01 | transcription_start_site | + | 461010 | 461010 | -969  | 5056 AN10621 |
| 1707 CONTIG84 | 447762 | 448101 | 1.5  | 1.08E-01 | transcription_start_site | - | 443667 | 443667 | -4264 | 5057 AN10622 |
| 1707 CONTIG84 | 447762 | 448101 | 1.5  | 1.08E-01 | transcription_start_site | - | 443568 | 443568 | -4363 | 5058 AN10622 |
| 1707 CONTIG84 | 447762 | 448101 | 1.5  | 1.08E-01 | transcription_start_site | - | 443476 | 443476 | -4455 | 5059 AN10622 |
| 1707 CONTIG84 | 447762 | 448101 | 1.5  | 1.08E-01 | transcription_start_site | - | 443324 | 443324 | -4607 | 5060 AN10622 |
| 267 CONTIG86  | 66230  | 66890  | 2.81 | 2.22E-03 | transcription_start_site | - | 62640  | 62640  | -3920 | 5067 AN10625 |
| 267 CONTIG86  | 66230  | 66890  | 2.81 | 2.22E-03 | transcription_start_site | - | 62270  | 62270  | -4290 | 5068 AN10625 |
| 267 CONTIG86  | 66230  | 66890  | 2.81 | 2.22E-03 | transcription_start_site | - | 61380  | 61380  | -5180 | 5069 AN10625 |
| 313 CONTIG86  | 74490  | 74851  | 2.75 | 3.03E-03 | transcription_start_site | + | 74783  | 74783  | -112  | 5070 AN10626 |
| 1609 CONTIG86 | 79067  | 79558  | 1.54 | 1.07E-01 | transcription_start_site | + | 81288  | 81288  | -1975 | 5077 AN10628 |
| 1609 CONTIG86 | 79067  | 79558  | 1.54 | 1.07E-01 | transcription_start_site | + | 81408  | 81408  | -2095 | 5078 AN10628 |
| 313 CONTIG86  | 74490  | 74851  | 2.75 | 3.03E-03 | transcription_start_site | + | 79549  | 79549  | -4878 | 5079 AN10629 |
| 313 CONTIG86  | 74490  | 74851  | 2.75 | 3.03E-03 | transcription_start_site | + | 79755  | 79755  | -5084 | 5080 AN10629 |
| 1609 CONTIG86 | 79067  | 79558  | 1.54 | 1.07E-01 | transcription_start_site | + | 79549  | 79549  | -236  | 5079 AN10629 |
| 1609 CONTIG86 | 79067  | 79558  | 1.54 | 1.07E-01 | transcription_start_site | + | 79755  | 79755  | -442  | 5080 AN10629 |
| 1609 CONTIG86 | 79067  | 79558  | 1.54 | 1.07E-01 | transcription_start_site | + | 80668  | 80668  | -1355 | 5081 AN10629 |
| 1834 CONTIG16 | 66685  | 67264  | 1.44 | 9.26E-02 | transcription_start_site | - | 62090  | 62090  | -4884 | 5082 AN1063  |
| 1834 CONTIG16 | 66685  | 67264  | 1.44 | 9.26E-02 | transcription_start_site | - | 61972  | 61972  | -5002 | 5083 AN1063  |
| 756 CONTIG86  | 96396  | 96808  | 2.15 | 1.06E-02 | transcription_start_site | + | 95909  | 95909  | 693   | 5088 AN10630 |
| 756 CONTIG86  | 96396  | 96808  | 2.15 | 1.06E-02 | transcription_start_site | + | 95616  | 95616  | 986   | 5087 AN10630 |
| 313 CONTIG86  | 74490  | 74851  | 2.75 | 3.03E-03 | transcription_start_site | + | 74090  | 74090  | 580   | 5091 AN10631 |
| 313 CONTIG86  | 74490  | 74851  | 2.75 | 3.03E-03 | transcription_start_site | + | 73897  | 73897  | 773   | 5090 AN10631 |
| 313 CONTIG86  | 74490  | 74851  | 2.75 | 3.03E-03 | transcription_start_site | + | 73656  | 73656  | 1014  | 5089 AN10631 |
| 2370 CONTIG88 | 113566 | 113991 | 1.24 | 8.01E-02 | transcription_start_site | + | 113762 | 113762 | 16    | 5096 AN10634 |
| 2370 CONTIG88 | 113566 | 113991 | 1.24 | 8.01E-02 | transcription_start_site | + | 114016 | 114016 | -237  | 5097 AN10634 |
| 2371 CONTIG88 | 123246 | 124555 | 1.24 | 8.01E-02 | transcription_start_site | + | 123123 | 123123 | 777   | 5105 AN10635 |
| 2371 CONTIG88 | 123246 | 124555 | 1.24 | 8.01E-02 | transcription_start_site | + | 122781 | 122781 | 1119  | 5104 AN10635 |
| 2371 CONTIG88 | 123246 | 124555 | 1.24 | 8.01E-02 | transcription_start_site | + | 122603 | 122603 | 1297  | 5103 AN10635 |
| 2371 CONTIG88 | 123246 | 124555 | 1.24 | 8.01E-02 | transcription_start_site | + | 122424 | 122424 | 1476  | 5102 AN10635 |
| 1035 CONTIG88 | 139581 | 139935 | 1.88 | 2.32E-03 | transcription_start_site | + | 143713 | 143713 | -3955 | 5110 AN10638 |
| 1035 CONTIG88 | 139581 | 139935 | 1.88 | 2.32E-03 | transcription_start_site | + | 143865 | 143865 | -4107 | 5111 AN10638 |
| 1035 CONTIG88 | 139581 | 139935 | 1.88 | 2.32E-03 | transcription_start_site | + | 144328 | 144328 | -4570 | 5112 AN10638 |
| 1035 CONTIG88 | 139581 | 139935 | 1.88 | 2.32E-03 | transcription_start_site | + | 144587 | 144587 | -4829 | 5113 AN10638 |
| 1035 CONTIG88 | 139581 | 139935 | 1.88 | 2.32E-03 | transcription_start_site | + | 144668 | 144668 | -4910 | 5114 AN10638 |
| 2850 CONTIG88 | 141236 | 141520 | 1.04 | 1.66E-01 | transcription_start_site | + | 143713 | 143713 | -2335 | 5110 AN10638 |
| 2850 CONTIG88 | 141236 | 141520 | 1.04 | 1.66E-01 | transcription_start_site | + | 143865 | 143865 | -2487 | 5111 AN10638 |
| 2850 CONTIG88 | 141236 | 141520 | 1.04 | 1.66E-01 | transcription_start_site | + | 144328 | 144328 | -2950 | 5112 AN10638 |
| 2850 CONTIG88 | 141236 | 141520 | 1.04 | 1.66E-01 | transcription_start_site | + | 144587 | 144587 | -3209 | 5113 AN10638 |
| 2850 CONTIG88 | 141236 | 141520 | 1.04 | 1.66E-01 | transcription_start_site | + | 144668 | 144668 | -3290 | 5114 AN10638 |
| 2850 CONTIG88 | 141236 | 141520 | 1.04 | 1.66E-01 | transcription_start_site | + | 146001 | 146001 | -4623 | 5115 AN10638 |
| 2850 CONTIG88 | 141236 | 141520 | 1.04 | 1.66E-01 | transcription_start_site | + | 146215 | 146215 | -4837 | 5116 AN10638 |
| 1312 CONTIG88 | 151818 | 152092 | 1.68 | 1.30E-02 | transcription_start_site | - | 152865 | 152865 | 910   | 5118 AN10639 |
| 1136 CONTIG88 | 159019 | 159293 | 1.8  | 7.85E-03 | transcription_start_site | - | 154246 | 154246 | -4910 | 5135 AN10644 |
| 2371 CONTIG88 | 123246 | 124555 | 1.24 | 8.01E-02 | transcription_start_site | + | 124037 | 124037 | -136  | 5138 AN10645 |
| 2371 CONTIG88 | 123246 | 124555 | 1.24 | 8.01E-02 | transcription_start_site | + | 124375 | 124375 | -474  | 5139 AN10645 |
| 449 CONTIG88  | 172070 | 172559 | 2.52 | 0.00E+00 | transcription_start_site | + | 176625 | 176625 | -4310 | 5140 AN10646 |
| 2370 CONTIG88 | 113566 | 113991 | 1.24 | 8.01E-02 | transcription_start_site | + | 116653 | 116653 | -2874 | 5142 AN10647 |
| 2370 CONTIG88 | 113566 | 113991 | 1.24 | 8.01E-02 | transcription_start_site | + | 116935 | 116935 | -3156 | 5143 AN10647 |
| 463 CONTIG89  | 99088  | 99960  | 2.49 | 1.01E-03 | transcription_start_site | - | 95559  | 95559  | -3965 | 5144 AN10648 |

|      |          |        |        |      |          |                          |   |        |        |       |      |         |
|------|----------|--------|--------|------|----------|--------------------------|---|--------|--------|-------|------|---------|
| 463  | CONTIG89 | 99088  | 99960  | 2.49 | 1.01E-03 | transcription_start_site | - | 95406  | 95406  | -4118 | 5145 | AN10648 |
| 463  | CONTIG89 | 99088  | 99960  | 2.49 | 1.01E-03 | transcription_start_site | - | 94283  | 94283  | -5241 | 5146 | AN10648 |
| 1125 | CONTIG89 | 268585 | 269387 | 1.81 | 1.84E-02 | transcription_start_site | - | 269542 | 269542 | 556   | 5152 | AN10649 |
| 1125 | CONTIG89 | 268585 | 269387 | 1.81 | 1.84E-02 | transcription_start_site | - | 269646 | 269646 | 660   | 5151 | AN10649 |
| 1125 | CONTIG89 | 268585 | 269387 | 1.81 | 1.84E-02 | transcription_start_site | - | 269820 | 269820 | 834   | 5150 | AN10649 |
| 1834 | CONTIG16 | 66685  | 67264  | 1.44 | 9.26E-02 | transcription_start_site | + | 66341  | 66341  | 633   | 5156 | AN1065  |
| 1834 | CONTIG16 | 66685  | 67264  | 1.44 | 9.26E-02 | transcription_start_site | + | 65795  | 65795  | 1179  | 5155 | AN1065  |
| 2171 | CONTIG89 | 162995 | 163264 | 1.31 | 1.08E-01 | transcription_start_site | - | 162314 | 162314 | -815  | 5161 | AN10651 |
| 2171 | CONTIG89 | 162995 | 163264 | 1.31 | 1.08E-01 | transcription_start_site | - | 162232 | 162232 | -897  | 5162 | AN10651 |
| 2171 | CONTIG89 | 162995 | 163264 | 1.31 | 1.08E-01 | transcription_start_site | - | 162114 | 162114 | -1015 | 5163 | AN10651 |
| 2171 | CONTIG89 | 162995 | 163264 | 1.31 | 1.08E-01 | transcription_start_site | - | 161900 | 161900 | -1229 | 5164 | AN10651 |
| 1834 | CONTIG16 | 66685  | 67264  | 1.44 | 9.26E-02 | transcription_start_site | + | 67043  | 67043  | -68   | 5184 | AN1066  |
| 1834 | CONTIG16 | 66685  | 67264  | 1.44 | 9.26E-02 | transcription_start_site | + | 67163  | 67163  | -188  | 5185 | AN1066  |
| 346  | CONTIG93 | 264980 | 265344 | 2.69 | 8.69E-04 | transcription_start_site | - | 260351 | 260351 | -4811 | 5192 | AN10662 |
| 346  | CONTIG93 | 264980 | 265344 | 2.69 | 8.69E-04 | transcription_start_site | - | 260169 | 260169 | -4993 | 5193 | AN10662 |
| 346  | CONTIG93 | 264980 | 265344 | 2.69 | 8.69E-04 | transcription_start_site | - | 260094 | 260094 | -5068 | 5194 | AN10662 |
| 872  | CONTIG93 | 258170 | 258504 | 2.03 | 1.11E-02 | transcription_start_site | - | 259069 | 259069 | 732   | 5198 | AN10662 |
| 872  | CONTIG93 | 258170 | 258504 | 2.03 | 1.11E-02 | transcription_start_site | - | 258033 | 258033 | -304  | 5201 | AN10664 |
| 872  | CONTIG93 | 258170 | 258504 | 2.03 | 1.11E-02 | transcription_start_site | - | 257824 | 257824 | -513  | 5202 | AN10664 |
| 829  | CONTIG93 | 25428  | 25867  | 2.07 | 8.81E-03 | transcription_start_site | - | 21307  | 21307  | -4340 | 5203 | AN10665 |
| 829  | CONTIG93 | 25428  | 25867  | 2.07 | 8.81E-03 | transcription_start_site | - | 21069  | 21069  | -4578 | 5204 | AN10665 |
| 829  | CONTIG93 | 25428  | 25867  | 2.07 | 8.81E-03 | transcription_start_site | - | 20891  | 20891  | -4756 | 5205 | AN10665 |
| 829  | CONTIG93 | 25428  | 25867  | 2.07 | 8.81E-03 | transcription_start_site | - | 20776  | 20776  | -4871 | 5206 | AN10665 |
| 829  | CONTIG93 | 25428  | 25867  | 2.07 | 8.81E-03 | transcription_start_site | - | 20655  | 20655  | -4992 | 5207 | AN10665 |
| 498  | CONTIG94 | 14329  | 14603  | 2.45 | 2.39E-04 | transcription_start_site | + | 13336  | 13336  | 1130  | 5228 | AN10671 |
| 2851 | CONTIG94 | 30301  | 30810  | 1.04 | 1.66E-01 | transcription_start_site | + | 29383  | 29383  | 1172  | 5234 | AN10672 |
| 2610 | CONTIG94 | 171314 | 171750 | 1.16 | 1.08E-01 | transcription_start_site | - | 169494 | 169494 | -2038 | 5235 | AN10673 |
| 2610 | CONTIG94 | 171314 | 171750 | 1.16 | 1.08E-01 | transcription_start_site | - | 169030 | 169030 | -2502 | 5236 | AN10673 |
| 2610 | CONTIG94 | 171314 | 171750 | 1.16 | 1.08E-01 | transcription_start_site | - | 166684 | 166684 | -4848 | 5237 | AN10673 |
| 2610 | CONTIG94 | 171314 | 171750 | 1.16 | 1.08E-01 | transcription_start_site | - | 166431 | 166431 | -5101 | 5238 | AN10673 |
| 933  | CONTIG94 | 442968 | 443467 | 1.97 | 3.61E-03 | transcription_start_site | - | 440647 | 440647 | -2570 | 5244 | AN10676 |
| 933  | CONTIG94 | 442968 | 443467 | 1.97 | 3.61E-03 | transcription_start_site | - | 440495 | 440495 | -2722 | 5245 | AN10676 |
| 933  | CONTIG94 | 442968 | 443467 | 1.97 | 3.61E-03 | transcription_start_site | - | 440404 | 440404 | -2813 | 5246 | AN10676 |
| 933  | CONTIG94 | 442968 | 443467 | 1.97 | 3.61E-03 | transcription_start_site | - | 439380 | 439380 | -3837 | 5247 | AN10676 |
| 1516 | CONTIG94 | 441678 | 441958 | 1.57 | 2.12E-02 | transcription_start_site | - | 440647 | 440647 | -1171 | 5244 | AN10676 |
| 1516 | CONTIG94 | 441678 | 441958 | 1.57 | 2.12E-02 | transcription_start_site | - | 440495 | 440495 | -1323 | 5245 | AN10676 |
| 1516 | CONTIG94 | 441678 | 441958 | 1.57 | 2.12E-02 | transcription_start_site | - | 440404 | 440404 | -1414 | 5246 | AN10676 |
| 1516 | CONTIG94 | 441678 | 441958 | 1.57 | 2.12E-02 | transcription_start_site | - | 439380 | 439380 | -2438 | 5247 | AN10676 |
| 2250 | CONTIG94 | 440788 | 441657 | 1.28 | 5.05E-02 | transcription_start_site | - | 440647 | 440647 | -575  | 5244 | AN10676 |
| 2250 | CONTIG94 | 440788 | 441657 | 1.28 | 5.05E-02 | transcription_start_site | - | 440495 | 440495 | -727  | 5245 | AN10676 |
| 2250 | CONTIG94 | 440788 | 441657 | 1.28 | 5.05E-02 | transcription_start_site | - | 440404 | 440404 | -818  | 5246 | AN10676 |
| 2250 | CONTIG94 | 440788 | 441657 | 1.28 | 5.05E-02 | transcription_start_site | - | 439380 | 439380 | -1842 | 5247 | AN10676 |
| 2598 | CONTIG94 | 443943 | 445102 | 1.16 | 3.83E-02 | transcription_start_site | - | 440647 | 440647 | -3875 | 5244 | AN10676 |
| 2598 | CONTIG94 | 443943 | 445102 | 1.16 | 3.83E-02 | transcription_start_site | - | 440495 | 440495 | -4027 | 5245 | AN10676 |
| 2598 | CONTIG94 | 443943 | 445102 | 1.16 | 3.83E-02 | transcription_start_site | - | 440404 | 440404 | -4118 | 5246 | AN10676 |
| 2598 | CONTIG94 | 443943 | 445102 | 1.16 | 3.83E-02 | transcription_start_site | - | 439380 | 439380 | -5142 | 5247 | AN10676 |
| 2783 | CONTIG94 | 441993 | 442637 | 1.08 | 1.44E-01 | transcription_start_site | - | 440647 | 440647 | -1668 | 5244 | AN10676 |
| 2783 | CONTIG94 | 441993 | 442637 | 1.08 | 1.44E-01 | transcription_start_site | - | 440495 | 440495 | -1820 | 5245 | AN10676 |
| 2783 | CONTIG94 | 441993 | 442637 | 1.08 | 1.44E-01 | transcription_start_site | - | 440404 | 440404 | -1911 | 5246 | AN10676 |
| 2783 | CONTIG94 | 441993 | 442637 | 1.08 | 1.44E-01 | transcription_start_site | - | 439380 | 439380 | -2935 | 5247 | AN10676 |
| 972  | CONTIG94 | 474392 | 474726 | 1.93 | 4.61E-03 | transcription_start_site | + | 477222 | 477222 | -2663 | 5248 | AN10677 |
| 972  | CONTIG94 | 474392 | 474726 | 1.93 | 4.61E-03 | transcription_start_site | + | 477625 | 477625 | -3066 | 5249 | AN10677 |
| 972  | CONTIG94 | 474392 | 474726 | 1.93 | 4.61E-03 | transcription_start_site | + | 477699 | 477699 | -3140 | 5250 | AN10677 |
| 972  | CONTIG94 | 474392 | 474726 | 1.93 | 4.61E-03 | transcription_start_site | + | 477761 | 477761 | -3202 | 5251 | AN10677 |
| 972  | CONTIG94 | 474392 | 474726 | 1.93 | 4.61E-03 | transcription_start_site | + | 478429 | 478429 | -3870 | 5252 | AN10677 |
| 972  | CONTIG94 | 474392 | 474726 | 1.93 | 4.61E-03 | transcription_start_site | + | 478566 | 478566 | -4007 | 5253 | AN10677 |
| 972  | CONTIG94 | 474392 | 474726 | 1.93 | 4.61E-03 | transcription_start_site | + | 478736 | 478736 | -4177 | 5254 | AN10677 |

|      |          |        |        |      |          |                          |   |        |        |       |      |         |
|------|----------|--------|--------|------|----------|--------------------------|---|--------|--------|-------|------|---------|
| 2851 | CONTIG94 | 30301  | 30810  | 1.04 | 1.66E-01 | transcription_start_site | + | 30446  | 30446  | 109   | 5259 | AN10679 |
| 2851 | CONTIG94 | 30301  | 30810  | 1.04 | 1.66E-01 | transcription_start_site | + | 30321  | 30321  | 234   | 5258 | AN10679 |
| 1834 | CONTIG16 | 66685  | 67264  | 1.44 | 9.26E-02 | transcription_start_site | + | 69467  | 69467  | -2492 | 5260 | AN1068  |
| 1834 | CONTIG16 | 66685  | 67264  | 1.44 | 9.26E-02 | transcription_start_site | + | 69652  | 69652  | -2677 | 5261 | AN1068  |
| 1834 | CONTIG16 | 66685  | 67264  | 1.44 | 9.26E-02 | transcription_start_site | + | 69857  | 69857  | -2882 | 5262 | AN1068  |
| 2610 | CONTIG94 | 171314 | 171750 | 1.16 | 1.08E-01 | transcription_start_site | - | 171668 | 171668 | 136   | 5263 | AN10680 |
| 2610 | CONTIG94 | 171314 | 171750 | 1.16 | 1.08E-01 | transcription_start_site | - | 171277 | 171277 | -255  | 5264 | AN10680 |
| 2373 | CONTIG94 | 422102 | 422766 | 1.24 | 8.01E-02 | transcription_start_site | + | 421912 | 421912 | 522   | 5280 | AN10684 |
| 498  | CONTIG94 | 14329  | 14603  | 2.45 | 2.39E-04 | transcription_start_site | + | 13584  | 13584  | 882   | 5294 | AN10688 |
| 498  | CONTIG94 | 14329  | 14603  | 2.45 | 2.39E-04 | transcription_start_site | + | 13496  | 13496  | 970   | 5293 | AN10688 |
| 933  | CONTIG94 | 442968 | 443467 | 1.97 | 3.61E-03 | transcription_start_site | - | 443779 | 443779 | 561   | 5295 | AN10689 |
| 933  | CONTIG94 | 442968 | 443467 | 1.97 | 3.61E-03 | transcription_start_site | - | 441317 | 441317 | -1900 | 5296 | AN10689 |
| 1516 | CONTIG94 | 441678 | 441958 | 1.57 | 2.12E-02 | transcription_start_site | - | 441317 | 441317 | -501  | 5296 | AN10689 |
| 2250 | CONTIG94 | 440788 | 441657 | 1.28 | 5.05E-02 | transcription_start_site | - | 441317 | 441317 | 94    | 5296 | AN10689 |
| 2598 | CONTIG94 | 443943 | 445102 | 1.16 | 3.83E-02 | transcription_start_site | - | 443779 | 443779 | -743  | 5295 | AN10689 |
| 2598 | CONTIG94 | 443943 | 445102 | 1.16 | 3.83E-02 | transcription_start_site | - | 441317 | 441317 | -3205 | 5296 | AN10689 |
| 2783 | CONTIG94 | 441993 | 442637 | 1.08 | 1.44E-01 | transcription_start_site | - | 441317 | 441317 | -998  | 5296 | AN10689 |
| 456  | CONTIG95 | 18686  | 19325  | 2.51 | 1.80E-03 | transcription_start_site | - | 20057  | 20057  | 1051  | 5330 | AN10697 |
| 2173 | CONTIG95 | 40818  | 41152  | 1.31 | 1.44E-01 | transcription_start_site | - | 42088  | 42088  | 1103  | 5339 | AN10699 |
| 2013 | CONTIG98 | 297227 | 298123 | 1.37 | 1.07E-01 | transcription_start_site | - | 297779 | 297779 | 104   | 5351 | AN10703 |
| 462  | CONTIG98 | 470562 | 471051 | 2.49 | 0.00E+00 | transcription_start_site | - | 467731 | 467731 | -3075 | 5352 | AN10704 |
| 462  | CONTIG98 | 470562 | 471051 | 2.49 | 0.00E+00 | transcription_start_site | - | 467567 | 467567 | -3239 | 5353 | AN10704 |
| 462  | CONTIG98 | 470562 | 471051 | 2.49 | 0.00E+00 | transcription_start_site | - | 467014 | 467014 | -3792 | 5354 | AN10704 |
| 1469 | CONTIG98 | 471527 | 471886 | 1.61 | 5.88E-02 | transcription_start_site | - | 467731 | 467731 | -3975 | 5352 | AN10704 |
| 1469 | CONTIG98 | 471527 | 471886 | 1.61 | 5.88E-02 | transcription_start_site | - | 467567 | 467567 | -4139 | 5353 | AN10704 |
| 1469 | CONTIG98 | 471527 | 471886 | 1.61 | 5.88E-02 | transcription_start_site | - | 467014 | 467014 | -4692 | 5354 | AN10704 |
| 1469 | CONTIG98 | 471527 | 471886 | 1.61 | 5.88E-02 | transcription_start_site | - | 472315 | 472315 | 608   | 5355 | AN10705 |
| 2023 | CONTIG98 | 477313 | 477592 | 1.37 | 1.25E-01 | transcription_start_site | - | 472315 | 472315 | -5137 | 5355 | AN10705 |
| 2023 | CONTIG98 | 477313 | 477592 | 1.37 | 1.25E-01 | transcription_start_site | + | 477718 | 477718 | -265  | 5356 | AN10706 |
| 2023 | CONTIG98 | 477313 | 477592 | 1.37 | 1.25E-01 | transcription_start_site | + | 477778 | 477778 | -325  | 5357 | AN10706 |
| 2023 | CONTIG98 | 477313 | 477592 | 1.37 | 1.25E-01 | transcription_start_site | + | 477841 | 477841 | -388  | 5358 | AN10706 |
| 2023 | CONTIG98 | 477313 | 477592 | 1.37 | 1.25E-01 | transcription_start_site | + | 477954 | 477954 | -501  | 5359 | AN10706 |
| 1280 | CONTIG98 | 544202 | 544491 | 1.71 | 4.36E-02 | transcription_start_site | - | 544022 | 544022 | -324  | 5366 | AN10709 |
| 1280 | CONTIG98 | 544202 | 544491 | 1.71 | 4.36E-02 | transcription_start_site | - | 543959 | 543959 | -387  | 5367 | AN10709 |
| 1280 | CONTIG98 | 544202 | 544491 | 1.71 | 4.36E-02 | transcription_start_site | - | 543752 | 543752 | -594  | 5368 | AN10709 |
| 1280 | CONTIG98 | 544202 | 544491 | 1.71 | 4.36E-02 | transcription_start_site | - | 543420 | 543420 | -926  | 5369 | AN10709 |
| 1280 | CONTIG98 | 544202 | 544491 | 1.71 | 4.36E-02 | transcription_start_site | - | 541971 | 541971 | -2375 | 5370 | AN10709 |
| 2023 | CONTIG98 | 477313 | 477592 | 1.37 | 1.25E-01 | transcription_start_site | + | 479004 | 479004 | -1551 | 5373 | AN10710 |
| 2023 | CONTIG98 | 477313 | 477592 | 1.37 | 1.25E-01 | transcription_start_site | + | 479179 | 479179 | -1726 | 5374 | AN10710 |
| 2023 | CONTIG98 | 477313 | 477592 | 1.37 | 1.25E-01 | transcription_start_site | + | 479297 | 479297 | -1844 | 5375 | AN10710 |
| 2023 | CONTIG98 | 477313 | 477592 | 1.37 | 1.25E-01 | transcription_start_site | + | 479665 | 479665 | -2212 | 5376 | AN10710 |
| 2023 | CONTIG98 | 477313 | 477592 | 1.37 | 1.25E-01 | transcription_start_site | + | 479799 | 479799 | -2346 | 5377 | AN10710 |
| 2023 | CONTIG98 | 477313 | 477592 | 1.37 | 1.25E-01 | transcription_start_site | + | 480462 | 480462 | -3009 | 5378 | AN10711 |
| 2023 | CONTIG98 | 477313 | 477592 | 1.37 | 1.25E-01 | transcription_start_site | + | 481083 | 481083 | -3630 | 5379 | AN10711 |
| 2023 | CONTIG98 | 477313 | 477592 | 1.37 | 1.25E-01 | transcription_start_site | + | 481467 | 481467 | -4014 | 5380 | AN10711 |
| 2458 | CONTIG98 | 283140 | 283419 | 1.22 | 1.93E-01 | transcription_start_site | - | 279846 | 279846 | -3433 | 5387 | AN10713 |
| 2458 | CONTIG98 | 283140 | 283419 | 1.22 | 1.93E-01 | transcription_start_site | - | 279302 | 279302 | -3977 | 5388 | AN10713 |
| 2458 | CONTIG98 | 283140 | 283419 | 1.22 | 1.93E-01 | transcription_start_site | - | 278821 | 278821 | -4458 | 5389 | AN10713 |
| 2023 | CONTIG98 | 477313 | 477592 | 1.37 | 1.25E-01 | transcription_start_site | + | 482302 | 482302 | -4849 | 5391 | AN10715 |
| 1280 | CONTIG98 | 544202 | 544491 | 1.71 | 4.36E-02 | transcription_start_site | - | 541069 | 541069 | -3277 | 5400 | AN10718 |
| 1280 | CONTIG98 | 544202 | 544491 | 1.71 | 4.36E-02 | transcription_start_site | - | 540975 | 540975 | -3371 | 5401 | AN10718 |
| 1280 | CONTIG98 | 544202 | 544491 | 1.71 | 4.36E-02 | transcription_start_site | - | 540712 | 540712 | -3634 | 5402 | AN10718 |
| 1015 | CONTIG98 | 553371 | 553630 | 1.9  | 2.12E-02 | transcription_start_site | + | 554118 | 554118 | -617  | 5403 | AN10719 |
| 1015 | CONTIG98 | 553371 | 553630 | 1.9  | 2.12E-02 | transcription_start_site | + | 554278 | 554278 | -777  | 5404 | AN10719 |
| 1015 | CONTIG98 | 553371 | 553630 | 1.9  | 2.12E-02 | transcription_start_site | + | 554456 | 554456 | -955  | 5405 | AN10719 |
| 1015 | CONTIG98 | 553371 | 553630 | 1.9  | 2.12E-02 | transcription_start_site | - | 552138 | 552138 | -1362 | 5416 | AN10721 |
| 1015 | CONTIG98 | 553371 | 553630 | 1.9  | 2.12E-02 | transcription_start_site | - | 551877 | 551877 | -1623 | 5417 | AN10721 |

|      |           |        |        |      |          |                          |   |        |        |       |      |         |
|------|-----------|--------|--------|------|----------|--------------------------|---|--------|--------|-------|------|---------|
| 903  | CONTIG98  | 210002 | 210593 | 2    | 1.57E-02 | transcription_start_site | - | 207212 | 207212 | -3085 | 5418 | AN10722 |
| 903  | CONTIG98  | 210002 | 210593 | 2    | 1.57E-02 | transcription_start_site | - | 206918 | 206918 | -3379 | 5419 | AN10722 |
| 903  | CONTIG98  | 210002 | 210593 | 2    | 1.57E-02 | transcription_start_site | - | 206651 | 206651 | -3646 | 5420 | AN10722 |
| 903  | CONTIG98  | 210002 | 210593 | 2    | 1.57E-02 | transcription_start_site | - | 206552 | 206552 | -3745 | 5421 | AN10722 |
| 903  | CONTIG98  | 210002 | 210593 | 2    | 1.57E-02 | transcription_start_site | - | 206099 | 206099 | -4198 | 5422 | AN10722 |
| 903  | CONTIG98  | 210002 | 210593 | 2    | 1.57E-02 | transcription_start_site | - | 205957 | 205957 | -4340 | 5423 | AN10722 |
| 903  | CONTIG98  | 210002 | 210593 | 2    | 1.57E-02 | transcription_start_site | - | 205361 | 205361 | -4936 | 5424 | AN10722 |
| 1084 | CONTIG98  | 210757 | 211331 | 1.85 | 2.62E-02 | transcription_start_site | - | 207212 | 207212 | -3832 | 5418 | AN10722 |
| 1084 | CONTIG98  | 210757 | 211331 | 1.85 | 2.62E-02 | transcription_start_site | - | 206918 | 206918 | -4126 | 5419 | AN10722 |
| 1084 | CONTIG98  | 210757 | 211331 | 1.85 | 2.62E-02 | transcription_start_site | - | 206651 | 206651 | -4393 | 5420 | AN10722 |
| 1084 | CONTIG98  | 210757 | 211331 | 1.85 | 2.62E-02 | transcription_start_site | - | 206552 | 206552 | -4492 | 5421 | AN10722 |
| 1084 | CONTIG98  | 210757 | 211331 | 1.85 | 2.62E-02 | transcription_start_site | - | 206099 | 206099 | -4945 | 5422 | AN10722 |
| 1084 | CONTIG98  | 210757 | 211331 | 1.85 | 2.62E-02 | transcription_start_site | - | 205957 | 205957 | -5087 | 5423 | AN10722 |
| 1469 | CONTIG98  | 471527 | 471886 | 1.61 | 5.88E-02 | transcription_start_site | - | 472866 | 472866 | 1159  | 5431 | AN10724 |
| 2023 | CONTIG98  | 477313 | 477592 | 1.37 | 1.25E-01 | transcription_start_site | - | 472866 | 472866 | -4586 | 5431 | AN10724 |
| 539  | CONTIG98  | 427893 | 428465 | 2.39 | 4.46E-04 | transcription_start_site | + | 431937 | 431937 | -3758 | 5432 | AN10725 |
| 2310 | CONTIG98  | 432467 | 432741 | 1.27 | 1.66E-01 | transcription_start_site | + | 431937 | 431937 | 667   | 5432 | AN10725 |
| 63   | CONTIG98  | 436515 | 437082 | 3.37 | 0.00E+00 | transcription_start_site | + | 438739 | 438739 | -1940 | 5433 | AN10726 |
| 412  | CONTIG98  | 433953 | 434251 | 2.59 | 1.54E-03 | transcription_start_site | + | 438739 | 438739 | -4637 | 5433 | AN10726 |
| 701  | CONTIG98  | 434343 | 435442 | 2.19 | 1.28E-03 | transcription_start_site | + | 438739 | 438739 | -3846 | 5433 | AN10726 |
| 63   | CONTIG98  | 436515 | 437082 | 3.37 | 0.00E+00 | transcription_start_site | + | 440867 | 440867 | -4068 | 5434 | AN10727 |
| 462  | CONTIG98  | 470562 | 471051 | 2.49 | 0.00E+00 | transcription_start_site | - | 465885 | 465885 | -4921 | 5443 | AN10730 |
| 462  | CONTIG98  | 470562 | 471051 | 2.49 | 0.00E+00 | transcription_start_site | - | 465761 | 465761 | -5045 | 5444 | AN10730 |
| 462  | CONTIG98  | 470562 | 471051 | 2.49 | 0.00E+00 | transcription_start_site | - | 465622 | 465622 | -5184 | 5445 | AN10730 |
| 1468 | CONTIG98  | 196512 | 196866 | 1.61 | 5.88E-02 | transcription_start_site | - | 194437 | 194437 | -2252 | 5446 | AN10731 |
| 1468 | CONTIG98  | 196512 | 196866 | 1.61 | 5.88E-02 | transcription_start_site | - | 194163 | 194163 | -2526 | 5447 | AN10731 |
| 1907 | CONTIG98  | 199292 | 199865 | 1.41 | 9.26E-02 | transcription_start_site | - | 194437 | 194437 | -5141 | 5446 | AN10731 |
| 2021 | CONTIG98  | 197027 | 197606 | 1.37 | 1.25E-01 | transcription_start_site | - | 194437 | 194437 | -2879 | 5446 | AN10731 |
| 2021 | CONTIG98  | 197027 | 197606 | 1.37 | 1.25E-01 | transcription_start_site | - | 194163 | 194163 | -3153 | 5447 | AN10731 |
| 354  | CONTIG100 | 194927 | 195366 | 2.67 | 0.00E+00 | transcription_start_site | + | 195680 | 195680 | -533  | 5463 | AN10735 |
| 142  | CONTIG100 | 218628 | 218987 | 3.07 | 2.67E-04 | transcription_start_site | - | 216760 | 216760 | -2047 | 5464 | AN10736 |
| 142  | CONTIG100 | 218628 | 218987 | 3.07 | 2.67E-04 | transcription_start_site | - | 216055 | 216055 | -2752 | 5465 | AN10736 |
| 142  | CONTIG100 | 218628 | 218987 | 3.07 | 2.67E-04 | transcription_start_site | - | 215666 | 215666 | -3141 | 5466 | AN10736 |
| 975  | CONTIG100 | 219528 | 220192 | 1.93 | 1.06E-02 | transcription_start_site | - | 216760 | 216760 | -3100 | 5464 | AN10736 |
| 975  | CONTIG100 | 219528 | 220192 | 1.93 | 1.06E-02 | transcription_start_site | - | 216055 | 216055 | -3805 | 5465 | AN10736 |
| 975  | CONTIG100 | 219528 | 220192 | 1.93 | 1.06E-02 | transcription_start_site | - | 215666 | 215666 | -4194 | 5466 | AN10736 |
| 2238 | CONTIG100 | 215868 | 216362 | 1.29 | 1.66E-01 | transcription_start_site | - | 216055 | 216055 | -60   | 5465 | AN10736 |
| 2238 | CONTIG100 | 215868 | 216362 | 1.29 | 1.66E-01 | transcription_start_site | - | 215666 | 215666 | -449  | 5466 | AN10736 |
| 2238 | CONTIG100 | 215868 | 216362 | 1.29 | 1.66E-01 | transcription_start_site | - | 216760 | 216760 | 645   | 5464 | AN10736 |
| 2391 | CONTIG100 | 216463 | 217112 | 1.24 | 1.79E-01 | transcription_start_site | - | 216760 | 216760 | -27   | 5464 | AN10736 |
| 2391 | CONTIG100 | 216463 | 217112 | 1.24 | 1.79E-01 | transcription_start_site | - | 216055 | 216055 | -732  | 5465 | AN10736 |
| 2391 | CONTIG100 | 216463 | 217112 | 1.24 | 1.79E-01 | transcription_start_site | - | 215666 | 215666 | -1121 | 5466 | AN10736 |
| 1245 | CONTIG100 | 262221 | 262705 | 1.73 | 2.64E-02 | transcription_start_site | + | 263339 | 263339 | -876  | 5479 | AN10742 |
| 263  | CONTIG100 | 250746 | 251231 | 2.82 | 0.00E+00 | transcription_start_site | - | 249162 | 249162 | -1826 | 5480 | AN10743 |
| 263  | CONTIG100 | 250746 | 251231 | 2.82 | 0.00E+00 | transcription_start_site | - | 249010 | 249010 | -1978 | 5481 | AN10743 |
| 263  | CONTIG100 | 250746 | 251231 | 2.82 | 0.00E+00 | transcription_start_site | - | 248805 | 248805 | -2183 | 5482 | AN10743 |
| 263  | CONTIG100 | 250746 | 251231 | 2.82 | 0.00E+00 | transcription_start_site | - | 248197 | 248197 | -2791 | 5483 | AN10743 |
| 263  | CONTIG100 | 250746 | 251231 | 2.82 | 0.00E+00 | transcription_start_site | - | 248015 | 248015 | -2973 | 5484 | AN10743 |
| 1603 | CONTIG100 | 249921 | 250475 | 1.54 | 8.01E-02 | transcription_start_site | - | 249162 | 249162 | -1036 | 5480 | AN10743 |
| 1603 | CONTIG100 | 249921 | 250475 | 1.54 | 8.01E-02 | transcription_start_site | - | 249010 | 249010 | -1188 | 5481 | AN10743 |
| 1603 | CONTIG100 | 249921 | 250475 | 1.54 | 8.01E-02 | transcription_start_site | - | 248805 | 248805 | -1393 | 5482 | AN10743 |
| 1603 | CONTIG100 | 249921 | 250475 | 1.54 | 8.01E-02 | transcription_start_site | - | 248197 | 248197 | -2001 | 5483 | AN10743 |
| 1603 | CONTIG100 | 249921 | 250475 | 1.54 | 8.01E-02 | transcription_start_site | - | 248015 | 248015 | -2183 | 5484 | AN10743 |
| 1107 | CONTIG100 | 106366 | 106870 | 1.83 | 1.20E-02 | transcription_start_site | + | 107680 | 107680 | -1062 | 5485 | AN10744 |
| 2393 | CONTIG100 | 108076 | 108425 | 1.24 | 1.93E-01 | transcription_start_site | + | 107680 | 107680 | 570   | 5485 | AN10744 |
| 1107 | CONTIG100 | 106366 | 106870 | 1.83 | 1.20E-02 | transcription_start_site | + | 107973 | 107973 | -1355 | 5486 | AN10745 |
| 1107 | CONTIG100 | 106366 | 106870 | 1.83 | 1.20E-02 | transcription_start_site | + | 108399 | 108399 | -1781 | 5487 | AN10745 |



|                |        |        |      |          |                          |   |        |        |       |      |         |
|----------------|--------|--------|------|----------|--------------------------|---|--------|--------|-------|------|---------|
| 1107 CONTIG100 | 106366 | 106870 | 1.83 | 1.20E-02 | transcription_start_site | + | 108509 | 108509 | -1891 | 5488 | AN10745 |
| 1107 CONTIG100 | 106366 | 106870 | 1.83 | 1.20E-02 | transcription_start_site | + | 108649 | 108649 | -2031 | 5489 | AN10745 |
| 1107 CONTIG100 | 106366 | 106870 | 1.83 | 1.20E-02 | transcription_start_site | + | 108833 | 108833 | -2215 | 5490 | AN10745 |
| 2087 CONTIG100 | 108921 | 109405 | 1.34 | 1.44E-01 | transcription_start_site | + | 108833 | 108833 | 330   | 5490 | AN10745 |
| 2087 CONTIG100 | 108921 | 109405 | 1.34 | 1.44E-01 | transcription_start_site | + | 108649 | 108649 | 514   | 5489 | AN10745 |
| 2087 CONTIG100 | 108921 | 109405 | 1.34 | 1.44E-01 | transcription_start_site | + | 108509 | 108509 | 654   | 5488 | AN10745 |
| 2087 CONTIG100 | 108921 | 109405 | 1.34 | 1.44E-01 | transcription_start_site | + | 108399 | 108399 | 764   | 5487 | AN10745 |
| 2087 CONTIG100 | 108921 | 109405 | 1.34 | 1.44E-01 | transcription_start_site | + | 107973 | 107973 | 1190  | 5486 | AN10745 |
| 2393 CONTIG100 | 108076 | 108425 | 1.24 | 1.93E-01 | transcription_start_site | + | 108399 | 108399 | -148  | 5487 | AN10745 |
| 2393 CONTIG100 | 108076 | 108425 | 1.24 | 1.93E-01 | transcription_start_site | + | 108509 | 108509 | -258  | 5488 | AN10745 |
| 2393 CONTIG100 | 108076 | 108425 | 1.24 | 1.93E-01 | transcription_start_site | + | 107973 | 107973 | 277   | 5486 | AN10745 |
| 2393 CONTIG100 | 108076 | 108425 | 1.24 | 1.93E-01 | transcription_start_site | + | 108649 | 108649 | -398  | 5489 | AN10745 |
| 2393 CONTIG100 | 108076 | 108425 | 1.24 | 1.93E-01 | transcription_start_site | + | 108833 | 108833 | -582  | 5490 | AN10745 |
| 1107 CONTIG100 | 106366 | 106870 | 1.83 | 1.20E-02 | transcription_start_site | + | 110315 | 110315 | -3697 | 5491 | AN10746 |
| 1107 CONTIG100 | 106366 | 106870 | 1.83 | 1.20E-02 | transcription_start_site | + | 110442 | 110442 | -3824 | 5492 | AN10746 |
| 2087 CONTIG100 | 108921 | 109405 | 1.34 | 1.44E-01 | transcription_start_site | + | 110315 | 110315 | -1152 | 5491 | AN10746 |
| 2087 CONTIG100 | 108921 | 109405 | 1.34 | 1.44E-01 | transcription_start_site | + | 110442 | 110442 | -1279 | 5492 | AN10746 |
| 2393 CONTIG100 | 108076 | 108425 | 1.24 | 1.93E-01 | transcription_start_site | + | 110315 | 110315 | -2064 | 5491 | AN10746 |
| 2393 CONTIG100 | 108076 | 108425 | 1.24 | 1.93E-01 | transcription_start_site | + | 110442 | 110442 | -2191 | 5492 | AN10746 |
| 1177 CONTIG100 | 111466 | 111725 | 1.78 | 3.70E-02 | transcription_start_site | + | 111991 | 111991 | -395  | 5493 | AN10747 |
| 1177 CONTIG100 | 111466 | 111725 | 1.78 | 3.70E-02 | transcription_start_site | + | 112121 | 112121 | -525  | 5494 | AN10747 |
| 2087 CONTIG100 | 108921 | 109405 | 1.34 | 1.44E-01 | transcription_start_site | + | 111991 | 111991 | -2828 | 5493 | AN10747 |
| 2087 CONTIG100 | 108921 | 109405 | 1.34 | 1.44E-01 | transcription_start_site | + | 112121 | 112121 | -2958 | 5494 | AN10747 |
| 2393 CONTIG100 | 108076 | 108425 | 1.24 | 1.93E-01 | transcription_start_site | + | 111991 | 111991 | -3740 | 5493 | AN10747 |
| 2393 CONTIG100 | 108076 | 108425 | 1.24 | 1.93E-01 | transcription_start_site | + | 112121 | 112121 | -3870 | 5494 | AN10747 |
| 1245 CONTIG100 | 262221 | 262705 | 1.73 | 2.64E-02 | transcription_start_site | + | 266203 | 266203 | -3740 | 5495 | AN10748 |
| 1245 CONTIG100 | 262221 | 262705 | 1.73 | 2.64E-02 | transcription_start_site | + | 266336 | 266336 | -3873 | 5496 | AN10748 |
| 25 CONTIG100   | 179402 | 179691 | 3.57 | 0.00E+00 | transcription_start_site | + | 179809 | 179809 | -262  | 5499 | AN10750 |
| 25 CONTIG100   | 179402 | 179691 | 3.57 | 0.00E+00 | transcription_start_site | + | 183485 | 183485 | -3938 | 5500 | AN10750 |
| 511 CONTIG100  | 180237 | 180591 | 2.43 | 3.61E-03 | transcription_start_site | + | 179809 | 179809 | 605   | 5499 | AN10750 |
| 511 CONTIG100  | 180237 | 180591 | 2.43 | 3.61E-03 | transcription_start_site | + | 183485 | 183485 | -3071 | 5500 | AN10750 |
| 142 CONTIG100  | 218628 | 218987 | 3.07 | 2.67E-04 | transcription_start_site | - | 217841 | 217841 | -966  | 5501 | AN10751 |
| 142 CONTIG100  | 218628 | 218987 | 3.07 | 2.67E-04 | transcription_start_site | - | 217504 | 217504 | -1303 | 5502 | AN10751 |
| 975 CONTIG100  | 219528 | 220192 | 1.93 | 1.06E-02 | transcription_start_site | - | 217841 | 217841 | -2019 | 5501 | AN10751 |
| 975 CONTIG100  | 219528 | 220192 | 1.93 | 1.06E-02 | transcription_start_site | - | 217504 | 217504 | -2356 | 5502 | AN10751 |
| 2391 CONTIG100 | 216463 | 217112 | 1.24 | 1.79E-01 | transcription_start_site | - | 217504 | 217504 | 716   | 5502 | AN10751 |
| 2391 CONTIG100 | 216463 | 217112 | 1.24 | 1.79E-01 | transcription_start_site | - | 217841 | 217841 | 1053  | 5501 | AN10751 |
| 263 CONTIG100  | 250746 | 251231 | 2.82 | 0.00E+00 | transcription_start_site | - | 250921 | 250921 | -67   | 5503 | AN10752 |
| 263 CONTIG100  | 250746 | 251231 | 2.82 | 0.00E+00 | transcription_start_site | - | 250293 | 250293 | -695  | 5504 | AN10752 |
| 263 CONTIG100  | 250746 | 251231 | 2.82 | 0.00E+00 | transcription_start_site | - | 250148 | 250148 | -840  | 5505 | AN10752 |
| 263 CONTIG100  | 250746 | 251231 | 2.82 | 0.00E+00 | transcription_start_site | - | 249661 | 249661 | -1327 | 5506 | AN10752 |
| 1603 CONTIG100 | 249921 | 250475 | 1.54 | 8.01E-02 | transcription_start_site | - | 250148 | 250148 | -50   | 5505 | AN10752 |
| 1603 CONTIG100 | 249921 | 250475 | 1.54 | 8.01E-02 | transcription_start_site | - | 250293 | 250293 | 95    | 5504 | AN10752 |
| 1603 CONTIG100 | 249921 | 250475 | 1.54 | 8.01E-02 | transcription_start_site | - | 249661 | 249661 | -537  | 5506 | AN10752 |
| 1603 CONTIG100 | 249921 | 250475 | 1.54 | 8.01E-02 | transcription_start_site | - | 250921 | 250921 | 723   | 5503 | AN10752 |
| 2224 CONTIG101 | 65928  | 66277  | 1.29 | 1.25E-01 | transcription_start_site | + | 70442  | 70442  | -4339 | 5507 | AN10753 |
| 2224 CONTIG101 | 65928  | 66277  | 1.29 | 1.25E-01 | transcription_start_site | + | 70909  | 70909  | -4806 | 5508 | AN10753 |
| 1210 CONTIG101 | 192615 | 192959 | 1.75 | 1.44E-02 | transcription_start_site | - | 193364 | 193364 | 577   | 5524 | AN10758 |
| 2226 CONTIG101 | 179565 | 179909 | 1.29 | 1.25E-01 | transcription_start_site | + | 181851 | 181851 | -2114 | 5525 | AN10759 |
| 2224 CONTIG101 | 65928  | 66277  | 1.29 | 1.25E-01 | transcription_start_site | + | 67035  | 67035  | -932  | 5528 | AN10760 |
| 2224 CONTIG101 | 65928  | 66277  | 1.29 | 1.25E-01 | transcription_start_site | + | 69193  | 69193  | -3090 | 5529 | AN10760 |
| 2224 CONTIG101 | 65928  | 66277  | 1.29 | 1.25E-01 | transcription_start_site | + | 69524  | 69524  | -3421 | 5530 | AN10760 |
| 685 CONTIG101  | 166503 | 167242 | 2.21 | 4.61E-03 | transcription_start_site | + | 167370 | 167370 | -497  | 5531 | AN10761 |
| 685 CONTIG101  | 166503 | 167242 | 2.21 | 4.61E-03 | transcription_start_site | + | 167529 | 167529 | -656  | 5532 | AN10761 |
| 1770 CONTIG101 | 167263 | 168353 | 1.47 | 4.42E-02 | transcription_start_site | + | 167529 | 167529 | 279   | 5532 | AN10761 |
| 1770 CONTIG101 | 167263 | 168353 | 1.47 | 4.42E-02 | transcription_start_site | + | 167370 | 167370 | 438   | 5531 | AN10761 |
| 2516 CONTIG101 | 102154 | 102441 | 1.2  | 1.66E-01 | transcription_start_site | - | 102640 | 102640 | 342   | 5541 | AN10762 |

|      |           |        |        |      |          |                          |   |        |        |       |      |         |
|------|-----------|--------|--------|------|----------|--------------------------|---|--------|--------|-------|------|---------|
| 2516 | CONTIG101 | 102154 | 102441 | 1.2  | 1.66E-01 | transcription_start_site | - | 102928 | 102928 | 630   | 5540 | AN10762 |
| 2516 | CONTIG101 | 102154 | 102441 | 1.2  | 1.66E-01 | transcription_start_site | - | 103101 | 103101 | 803   | 5539 | AN10762 |
| 2516 | CONTIG101 | 102154 | 102441 | 1.2  | 1.66E-01 | transcription_start_site | - | 103226 | 103226 | 928   | 5538 | AN10762 |
| 2516 | CONTIG101 | 102154 | 102441 | 1.2  | 1.66E-01 | transcription_start_site | - | 103439 | 103439 | 1141  | 5537 | AN10762 |
| 599  | CONTIG102 | 29181  | 29537  | 2.31 | 6.61E-03 | transcription_start_site | + | 29808  | 29808  | -449  | 5542 | AN10763 |
| 599  | CONTIG102 | 29181  | 29537  | 2.31 | 6.61E-03 | transcription_start_site | + | 30003  | 30003  | -644  | 5543 | AN10763 |
| 599  | CONTIG102 | 29181  | 29537  | 2.31 | 6.61E-03 | transcription_start_site | + | 31460  | 31460  | -2101 | 5544 | AN10763 |
| 599  | CONTIG102 | 29181  | 29537  | 2.31 | 6.61E-03 | transcription_start_site | + | 31938  | 31938  | -2579 | 5545 | AN10764 |
| 599  | CONTIG102 | 29181  | 29537  | 2.31 | 6.61E-03 | transcription_start_site | + | 32244  | 32244  | -2885 | 5546 | AN10764 |
| 1859 | CONTIG103 | 49596  | 50162  | 1.43 | 5.05E-02 | transcription_start_site | - | 47064  | 47064  | -2815 | 5551 | AN10766 |
| 1859 | CONTIG103 | 49596  | 50162  | 1.43 | 5.05E-02 | transcription_start_site | - | 46814  | 46814  | -3065 | 5552 | AN10766 |
| 1859 | CONTIG103 | 49596  | 50162  | 1.43 | 5.05E-02 | transcription_start_site | - | 46302  | 46302  | -3577 | 5553 | AN10766 |
| 1859 | CONTIG103 | 49596  | 50162  | 1.43 | 5.05E-02 | transcription_start_site | - | 48637  | 48637  | -1242 | 5556 | AN10768 |
| 1859 | CONTIG103 | 49596  | 50162  | 1.43 | 5.05E-02 | transcription_start_site | - | 48111  | 48111  | -1768 | 5557 | AN10768 |
| 1859 | CONTIG103 | 49596  | 50162  | 1.43 | 5.05E-02 | transcription_start_site | - | 47407  | 47407  | -2472 | 5558 | AN10768 |
| 1775 | CONTIG104 | 107927 | 108276 | 1.47 | 6.84E-02 | transcription_start_site | + | 113223 | 113223 | -5121 | 5575 | AN10772 |
| 978  | CONTIG104 | 213828 | 214112 | 1.93 | 1.30E-02 | transcription_start_site | + | 215161 | 215161 | -1191 | 5576 | AN10773 |
| 1874 | CONTIG104 | 210303 | 211192 | 1.42 | 5.52E-02 | transcription_start_site | + | 215161 | 215161 | -4413 | 5576 | AN10773 |
| 1608 | CONTIG105 | 224121 | 224615 | 1.54 | 9.24E-02 | transcription_start_site | + | 229582 | 229582 | -5214 | 5592 | AN10779 |
| 1843 | CONTIG105 | 257639 | 257930 | 1.44 | 1.25E-01 | transcription_start_site | - | 257175 | 257175 | -609  | 5601 | AN10780 |
| 1843 | CONTIG105 | 257639 | 257930 | 1.44 | 1.25E-01 | transcription_start_site | - | 256801 | 256801 | -983  | 5602 | AN10780 |
| 1843 | CONTIG105 | 257639 | 257930 | 1.44 | 1.25E-01 | transcription_start_site | - | 256574 | 256574 | -1210 | 5603 | AN10780 |
| 1843 | CONTIG105 | 257639 | 257930 | 1.44 | 1.25E-01 | transcription_start_site | - | 256106 | 256106 | -1678 | 5604 | AN10780 |
| 856  | CONTIG105 | 213085 | 214794 | 2.05 | 3.45E-03 | transcription_start_site | - | 210716 | 210716 | -3223 | 5618 | AN10786 |
| 390  | CONTIG105 | 185336 | 185675 | 2.62 | 2.22E-03 | transcription_start_site | + | 184734 | 184734 | 771   | 5625 | AN10788 |
| 1843 | CONTIG105 | 257639 | 257930 | 1.44 | 1.25E-01 | transcription_start_site | - | 257881 | 257881 | 96    | 5635 | AN10790 |
| 1381 | CONTIG106 | 22884  | 23153  | 1.64 | 3.08E-02 | transcription_start_site | + | 22868  | 22868  | 150   | 5639 | AN10792 |
| 1381 | CONTIG106 | 22884  | 23153  | 1.64 | 3.08E-02 | transcription_start_site | + | 22714  | 22714  | 304   | 5638 | AN10792 |
| 1381 | CONTIG106 | 22884  | 23153  | 1.64 | 3.08E-02 | transcription_start_site | + | 23505  | 23505  | -486  | 5640 | AN10792 |
| 1381 | CONTIG106 | 22884  | 23153  | 1.64 | 3.08E-02 | transcription_start_site | + | 24066  | 24066  | -1047 | 5641 | AN10792 |
| 1791 | CONTIG106 | 18319  | 20168  | 1.46 | 3.99E-02 | transcription_start_site | + | 22714  | 22714  | -3470 | 5638 | AN10792 |
| 1791 | CONTIG106 | 18319  | 20168  | 1.46 | 3.99E-02 | transcription_start_site | + | 22868  | 22868  | -3624 | 5639 | AN10792 |
| 1791 | CONTIG106 | 18319  | 20168  | 1.46 | 3.99E-02 | transcription_start_site | + | 23505  | 23505  | -4261 | 5640 | AN10792 |
| 1791 | CONTIG106 | 18319  | 20168  | 1.46 | 3.99E-02 | transcription_start_site | + | 24066  | 24066  | -4822 | 5641 | AN10792 |
| 1381 | CONTIG106 | 22884  | 23153  | 1.64 | 3.08E-02 | transcription_start_site | + | 25517  | 25517  | -2498 | 5646 | AN10795 |
| 1381 | CONTIG106 | 22884  | 23153  | 1.64 | 3.08E-02 | transcription_start_site | + | 25769  | 25769  | -2750 | 5647 | AN10795 |
| 586  | CONTIG107 | 146342 | 146916 | 2.33 | 1.80E-03 | transcription_start_site | - | 143236 | 143236 | -3393 | 5653 | AN10797 |
| 586  | CONTIG107 | 146342 | 146916 | 2.33 | 1.80E-03 | transcription_start_site | - | 142903 | 142903 | -3726 | 5654 | AN10797 |
| 1094 | CONTIG16  | 122268 | 122614 | 1.84 | 3.08E-02 | transcription_start_site | - | 118395 | 118395 | -4046 | 5658 | AN1080  |
| 1094 | CONTIG16  | 122268 | 122614 | 1.84 | 3.08E-02 | transcription_start_site | - | 117844 | 117844 | -4597 | 5659 | AN1080  |
| 261  | CONTIG107 | 338857 | 339133 | 2.82 | 0.00E+00 | transcription_start_site | + | 340809 | 340809 | -1814 | 5662 | AN10801 |
| 261  | CONTIG107 | 338857 | 339133 | 2.82 | 0.00E+00 | transcription_start_site | + | 340887 | 340887 | -1892 | 5663 | AN10801 |
| 261  | CONTIG107 | 338857 | 339133 | 2.82 | 0.00E+00 | transcription_start_site | + | 341057 | 341057 | -2062 | 5664 | AN10801 |
| 261  | CONTIG107 | 338857 | 339133 | 2.82 | 0.00E+00 | transcription_start_site | + | 341777 | 341777 | -2782 | 5665 | AN10801 |
| 261  | CONTIG107 | 338857 | 339133 | 2.82 | 0.00E+00 | transcription_start_site | + | 342049 | 342049 | -3054 | 5666 | AN10801 |
| 651  | CONTIG107 | 339467 | 339813 | 2.24 | 3.03E-03 | transcription_start_site | + | 340809 | 340809 | -1169 | 5662 | AN10801 |
| 651  | CONTIG107 | 339467 | 339813 | 2.24 | 3.03E-03 | transcription_start_site | + | 340887 | 340887 | -1247 | 5663 | AN10801 |
| 651  | CONTIG107 | 339467 | 339813 | 2.24 | 3.03E-03 | transcription_start_site | + | 341057 | 341057 | -1417 | 5664 | AN10801 |
| 651  | CONTIG107 | 339467 | 339813 | 2.24 | 3.03E-03 | transcription_start_site | + | 341777 | 341777 | -2137 | 5665 | AN10801 |
| 651  | CONTIG107 | 339467 | 339813 | 2.24 | 3.03E-03 | transcription_start_site | + | 342049 | 342049 | -2409 | 5666 | AN10801 |
| 586  | CONTIG107 | 146342 | 146916 | 2.33 | 1.80E-03 | transcription_start_site | - | 141760 | 141760 | -4869 | 5675 | AN10804 |
| 586  | CONTIG107 | 146342 | 146916 | 2.33 | 1.80E-03 | transcription_start_site | - | 141575 | 141575 | -5054 | 5676 | AN10804 |
| 2194 | CONTIG107 | 275562 | 275906 | 1.3  | 1.08E-01 | transcription_start_site | + | 278025 | 278025 | -2291 | 5682 | AN10807 |
| 2194 | CONTIG107 | 275562 | 275906 | 1.3  | 1.08E-01 | transcription_start_site | + | 278643 | 278643 | -2909 | 5683 | AN10807 |
| 2194 | CONTIG107 | 275562 | 275906 | 1.3  | 1.08E-01 | transcription_start_site | + | 278976 | 278976 | -3242 | 5684 | AN10807 |
| 2194 | CONTIG107 | 275562 | 275906 | 1.3  | 1.08E-01 | transcription_start_site | + | 279486 | 279486 | -3752 | 5685 | AN10807 |
| 2194 | CONTIG107 | 275562 | 275906 | 1.3  | 1.08E-01 | transcription_start_site | + | 279863 | 279863 | -4129 | 5686 | AN10807 |

|                |        |        |      |          |                          |   |        |        |       |              |
|----------------|--------|--------|------|----------|--------------------------|---|--------|--------|-------|--------------|
| 2714 CONTIG107 | 277443 | 278318 | 1.12 | 1.79E-01 | transcription_start_site | + | 278025 | 278025 | -144  | 5682 AN10807 |
| 2714 CONTIG107 | 277443 | 278318 | 1.12 | 1.79E-01 | transcription_start_site | + | 278643 | 278643 | -762  | 5683 AN10807 |
| 2714 CONTIG107 | 277443 | 278318 | 1.12 | 1.79E-01 | transcription_start_site | + | 278976 | 278976 | -1095 | 5684 AN10807 |
| 2714 CONTIG107 | 277443 | 278318 | 1.12 | 1.79E-01 | transcription_start_site | + | 279486 | 279486 | -1605 | 5685 AN10807 |
| 2714 CONTIG107 | 277443 | 278318 | 1.12 | 1.79E-01 | transcription_start_site | + | 279863 | 279863 | -1982 | 5686 AN10807 |
| 2719 CONTIG107 | 276392 | 277418 | 1.12 | 1.99E-01 | transcription_start_site | + | 278025 | 278025 | -1120 | 5682 AN10807 |
| 2719 CONTIG107 | 276392 | 277418 | 1.12 | 1.99E-01 | transcription_start_site | + | 278643 | 278643 | -1738 | 5683 AN10807 |
| 2719 CONTIG107 | 276392 | 277418 | 1.12 | 1.99E-01 | transcription_start_site | + | 278976 | 278976 | -2071 | 5684 AN10807 |
| 2719 CONTIG107 | 276392 | 277418 | 1.12 | 1.99E-01 | transcription_start_site | + | 279486 | 279486 | -2581 | 5685 AN10807 |
| 2719 CONTIG107 | 276392 | 277418 | 1.12 | 1.99E-01 | transcription_start_site | + | 279863 | 279863 | -2958 | 5686 AN10807 |
| 2611 CONTIG107 | 314026 | 315055 | 1.16 | 1.11E-01 | transcription_start_site | - | 315677 | 315677 | 1136  | 5688 AN10808 |
| 2611 CONTIG107 | 314026 | 315055 | 1.16 | 1.11E-01 | transcription_start_site | - | 315815 | 315815 | 1274  | 5687 AN10808 |
| 261 CONTIG107  | 338857 | 339133 | 2.82 | 0.00E+00 | transcription_start_site | + | 339550 | 339550 | -555  | 5689 AN10809 |
| 261 CONTIG107  | 338857 | 339133 | 2.82 | 0.00E+00 | transcription_start_site | + | 340106 | 340106 | -1111 | 5690 AN10809 |
| 651 CONTIG107  | 339467 | 339813 | 2.24 | 3.03E-03 | transcription_start_site | + | 339550 | 339550 | 90    | 5689 AN10809 |
| 651 CONTIG107  | 339467 | 339813 | 2.24 | 3.03E-03 | transcription_start_site | + | 340106 | 340106 | -466  | 5690 AN10809 |
| 135 CONTIG107  | 364652 | 365166 | 3.09 | 0.00E+00 | transcription_start_site | + | 369046 | 369046 | -4137 | 5693 AN10810 |
| 1945 CONTIG107 | 367127 | 367567 | 1.39 | 8.01E-02 | transcription_start_site | + | 369046 | 369046 | -1699 | 5693 AN10810 |
| 585 CONTIG108  | 182720 | 183054 | 2.33 | 8.69E-04 | transcription_start_site | + | 184174 | 184174 | -1287 | 5724 AN10817 |
| 2158 CONTIG108 | 180685 | 181109 | 1.31 | 4.42E-02 | transcription_start_site | + | 184174 | 184174 | -3277 | 5724 AN10817 |
| 772 CONTIG108  | 123841 | 124100 | 2.12 | 1.80E-03 | transcription_start_site | - | 120277 | 120277 | -3693 | 5725 AN10818 |
| 2280 CONTIG108 | 122946 | 123298 | 1.27 | 6.16E-02 | transcription_start_site | - | 120277 | 120277 | -2845 | 5725 AN10818 |
| 1094 CONTIG16  | 122268 | 122614 | 1.84 | 3.08E-02 | transcription_start_site | - | 121758 | 121758 | -683  | 5728 AN1082  |
| 1094 CONTIG16  | 122268 | 122614 | 1.84 | 3.08E-02 | transcription_start_site | - | 120431 | 120431 | -2010 | 5729 AN1082  |
| 760 CONTIG109  | 35778  | 36133  | 2.14 | 4.61E-03 | transcription_start_site | + | 40940  | 40940  | -4984 | 5743 AN10823 |
| 760 CONTIG109  | 35778  | 36133  | 2.14 | 4.61E-03 | transcription_start_site | + | 41122  | 41122  | -5166 | 5744 AN10823 |
| 329 CONTIG109  | 66314  | 66593  | 2.72 | 2.39E-04 | transcription_start_site | + | 69668  | 69668  | -3214 | 5746 AN10824 |
| 329 CONTIG109  | 66314  | 66593  | 2.72 | 2.39E-04 | transcription_start_site | + | 69785  | 69785  | -3331 | 5747 AN10824 |
| 329 CONTIG109  | 66314  | 66593  | 2.72 | 2.39E-04 | transcription_start_site | + | 70028  | 70028  | -3574 | 5748 AN10824 |
| 329 CONTIG109  | 66314  | 66593  | 2.72 | 2.39E-04 | transcription_start_site | + | 70123  | 70123  | -3669 | 5749 AN10824 |
| 329 CONTIG109  | 66314  | 66593  | 2.72 | 2.39E-04 | transcription_start_site | + | 70428  | 70428  | -3974 | 5750 AN10824 |
| 329 CONTIG109  | 66314  | 66593  | 2.72 | 2.39E-04 | transcription_start_site | + | 70647  | 70647  | -4193 | 5751 AN10824 |
| 329 CONTIG109  | 66314  | 66593  | 2.72 | 2.39E-04 | transcription_start_site | + | 70941  | 70941  | -4487 | 5752 AN10824 |
| 329 CONTIG109  | 66314  | 66593  | 2.72 | 2.39E-04 | transcription_start_site | + | 71117  | 71117  | -4663 | 5753 AN10824 |
| 329 CONTIG109  | 66314  | 66593  | 2.72 | 2.39E-04 | transcription_start_site | + | 71539  | 71539  | -5085 | 5754 AN10824 |
| 760 CONTIG109  | 35778  | 36133  | 2.14 | 4.61E-03 | transcription_start_site | + | 37560  | 37560  | -1604 | 5762 AN10827 |
| 760 CONTIG109  | 35778  | 36133  | 2.14 | 4.61E-03 | transcription_start_site | + | 37656  | 37656  | -1700 | 5763 AN10827 |
| 760 CONTIG109  | 35778  | 36133  | 2.14 | 4.61E-03 | transcription_start_site | + | 39994  | 39994  | -4038 | 5764 AN10828 |
| 760 CONTIG109  | 35778  | 36133  | 2.14 | 4.61E-03 | transcription_start_site | + | 40079  | 40079  | -4123 | 5765 AN10828 |
| 760 CONTIG109  | 35778  | 36133  | 2.14 | 4.61E-03 | transcription_start_site | + | 40187  | 40187  | -4231 | 5766 AN10828 |
| 760 CONTIG109  | 35778  | 36133  | 2.14 | 4.61E-03 | transcription_start_site | + | 40276  | 40276  | -4320 | 5767 AN10828 |
| 760 CONTIG109  | 35778  | 36133  | 2.14 | 4.61E-03 | transcription_start_site | + | 40366  | 40366  | -4410 | 5768 AN10828 |
| 564 CONTIG109  | 9691   | 10123  | 2.36 | 1.54E-03 | transcription_start_site | - | 7091   | 7091   | -2816 | 5769 AN10829 |
| 564 CONTIG109  | 9691   | 10123  | 2.36 | 1.54E-03 | transcription_start_site | - | 6707   | 6707   | -3200 | 5770 AN10829 |
| 1094 CONTIG16  | 122268 | 122614 | 1.84 | 3.08E-02 | transcription_start_site | + | 122624 | 122624 | -183  | 5771 AN1083  |
| 1109 CONTIG109 | 157061 | 157502 | 1.83 | 1.57E-02 | transcription_start_site | + | 157392 | 157392 | -110  | 5772 AN10830 |
| 1109 CONTIG109 | 157061 | 157502 | 1.83 | 1.57E-02 | transcription_start_site | - | 154044 | 154044 | -3237 | 5773 AN10831 |
| 520 CONTIG110  | 77046  | 77320  | 2.42 | 2.22E-03 | transcription_start_site | - | 74033  | 74033  | -3150 | 5781 AN10834 |
| 520 CONTIG110  | 77046  | 77320  | 2.42 | 2.22E-03 | transcription_start_site | - | 73641  | 73641  | -3542 | 5782 AN10834 |
| 520 CONTIG110  | 77046  | 77320  | 2.42 | 2.22E-03 | transcription_start_site | - | 72663  | 72663  | -4520 | 5783 AN10834 |
| 2120 CONTIG110 | 197492 | 197842 | 1.33 | 1.25E-01 | transcription_start_site | - | 194092 | 194092 | -3575 | 5792 AN10837 |
| 2120 CONTIG110 | 197492 | 197842 | 1.33 | 1.25E-01 | transcription_start_site | - | 193934 | 193934 | -3733 | 5793 AN10837 |
| 2120 CONTIG110 | 197492 | 197842 | 1.33 | 1.25E-01 | transcription_start_site | - | 193431 | 193431 | -4236 | 5794 AN10837 |
| 2120 CONTIG110 | 197492 | 197842 | 1.33 | 1.25E-01 | transcription_start_site | - | 192688 | 192688 | -4979 | 5795 AN10837 |
| 491 CONTIG110  | 268596 | 269090 | 2.46 | 1.80E-03 | transcription_start_site | - | 268034 | 268034 | -809  | 5797 AN10838 |
| 491 CONTIG110  | 268596 | 269090 | 2.46 | 1.80E-03 | transcription_start_site | - | 267645 | 267645 | -1198 | 5798 AN10838 |
| 491 CONTIG110  | 268596 | 269090 | 2.46 | 1.80E-03 | transcription_start_site | - | 270043 | 270043 | 1200  | 5796 AN10838 |

|      |           |        |        |      |          |                          |   |        |        |       |      |         |
|------|-----------|--------|--------|------|----------|--------------------------|---|--------|--------|-------|------|---------|
| 491  | CONTIG110 | 268596 | 269090 | 2.46 | 1.80E-03 | transcription_start_site | - | 267468 | 267468 | -1375 | 5799 | AN10838 |
| 491  | CONTIG110 | 268596 | 269090 | 2.46 | 1.80E-03 | transcription_start_site | - | 267080 | 267080 | -1763 | 5800 | AN10838 |
| 491  | CONTIG110 | 268596 | 269090 | 2.46 | 1.80E-03 | transcription_start_site | - | 266201 | 266201 | -2642 | 5801 | AN10838 |
| 1094 | CONTIG16  | 122268 | 122614 | 1.84 | 3.08E-02 | transcription_start_site | + | 123764 | 123764 | -1323 | 5804 | AN1084  |
| 1094 | CONTIG16  | 122268 | 122614 | 1.84 | 3.08E-02 | transcription_start_site | + | 123985 | 123985 | -1544 | 5805 | AN1084  |
| 1094 | CONTIG16  | 122268 | 122614 | 1.84 | 3.08E-02 | transcription_start_site | + | 124070 | 124070 | -1629 | 5806 | AN1084  |
| 1094 | CONTIG16  | 122268 | 122614 | 1.84 | 3.08E-02 | transcription_start_site | + | 124398 | 124398 | -1957 | 5807 | AN1084  |
| 1094 | CONTIG16  | 122268 | 122614 | 1.84 | 3.08E-02 | transcription_start_site | + | 125141 | 125141 | -2700 | 5808 | AN1084  |
| 491  | CONTIG110 | 268596 | 269090 | 2.46 | 1.80E-03 | transcription_start_site | - | 265399 | 265399 | -3444 | 5817 | AN10843 |
| 491  | CONTIG110 | 268596 | 269090 | 2.46 | 1.80E-03 | transcription_start_site | - | 265151 | 265151 | -3692 | 5818 | AN10843 |
| 2853 | CONTIG112 | 114396 | 114875 | 1.04 | 1.79E-01 | transcription_start_site | - | 114256 | 114256 | -379  | 5819 | AN10844 |
| 2853 | CONTIG112 | 114396 | 114875 | 1.04 | 1.79E-01 | transcription_start_site | - | 114057 | 114057 | -578  | 5820 | AN10844 |
| 2853 | CONTIG112 | 114396 | 114875 | 1.04 | 1.79E-01 | transcription_start_site | - | 113936 | 113936 | -699  | 5821 | AN10844 |
| 2853 | CONTIG112 | 114396 | 114875 | 1.04 | 1.79E-01 | transcription_start_site | - | 113300 | 113300 | -1335 | 5822 | AN10844 |
| 385  | CONTIG112 | 351246 | 351580 | 2.62 | 0.00E+00 | transcription_start_site | - | 350869 | 350869 | -544  | 5829 | AN10846 |
| 385  | CONTIG112 | 351246 | 351580 | 2.62 | 0.00E+00 | transcription_start_site | - | 349478 | 349478 | -1935 | 5830 | AN10846 |
| 385  | CONTIG112 | 351246 | 351580 | 2.62 | 0.00E+00 | transcription_start_site | - | 348602 | 348602 | -2811 | 5831 | AN10846 |
| 385  | CONTIG112 | 351246 | 351580 | 2.62 | 0.00E+00 | transcription_start_site | - | 347498 | 347498 | -3915 | 5832 | AN10846 |
| 385  | CONTIG112 | 351246 | 351580 | 2.62 | 0.00E+00 | transcription_start_site | - | 346660 | 346660 | -4753 | 5833 | AN10846 |
| 1592 | CONTIG112 | 93239  | 93510  | 1.54 | 3.08E-02 | transcription_start_site | + | 93493  | 93493  | -118  | 5834 | AN10847 |
| 1592 | CONTIG112 | 93239  | 93510  | 1.54 | 3.08E-02 | transcription_start_site | + | 93676  | 93676  | -301  | 5835 | AN10847 |
| 1592 | CONTIG112 | 93239  | 93510  | 1.54 | 3.08E-02 | transcription_start_site | + | 93785  | 93785  | -410  | 5836 | AN10847 |
| 1592 | CONTIG112 | 93239  | 93510  | 1.54 | 3.08E-02 | transcription_start_site | + | 94145  | 94145  | -770  | 5837 | AN10847 |
| 1350 | CONTIG112 | 107191 | 107755 | 1.66 | 1.84E-02 | transcription_start_site | - | 108507 | 108507 | 1034  | 5847 | AN10849 |
| 2853 | CONTIG112 | 114396 | 114875 | 1.04 | 1.79E-01 | transcription_start_site | - | 111957 | 111957 | -2678 | 5844 | AN10849 |
| 1094 | CONTIG16  | 122268 | 122614 | 1.84 | 3.08E-02 | transcription_start_site | + | 126155 | 126155 | -3714 | 5848 | AN1085  |
| 1094 | CONTIG16  | 122268 | 122614 | 1.84 | 3.08E-02 | transcription_start_site | + | 126368 | 126368 | -3927 | 5849 | AN1085  |
| 1094 | CONTIG16  | 122268 | 122614 | 1.84 | 3.08E-02 | transcription_start_site | + | 126862 | 126862 | -4421 | 5850 | AN1085  |
| 499  | CONTIG112 | 140265 | 140555 | 2.45 | 6.10E-04 | transcription_start_site | + | 143928 | 143928 | -3518 | 5853 | AN10851 |
| 1999 | CONTIG112 | 140937 | 141366 | 1.37 | 5.88E-02 | transcription_start_site | + | 143928 | 143928 | -2776 | 5853 | AN10851 |
| 2351 | CONTIG112 | 144237 | 144582 | 1.25 | 7.51E-02 | transcription_start_site | + | 143928 | 143928 | 481   | 5853 | AN10851 |
| 2711 | CONTIG112 | 141612 | 142111 | 1.12 | 1.44E-01 | transcription_start_site | + | 143928 | 143928 | -2066 | 5853 | AN10851 |
| 1350 | CONTIG112 | 107191 | 107755 | 1.66 | 1.84E-02 | transcription_start_site | - | 108000 | 108000 | 527   | 5855 | AN10853 |
| 1350 | CONTIG112 | 107191 | 107755 | 1.66 | 1.84E-02 | transcription_start_site | - | 105943 | 105943 | -1530 | 5856 | AN10853 |
| 1433 | CONTIG113 | 161038 | 161389 | 1.62 | 5.88E-02 | transcription_start_site | - | 158541 | 158541 | -2672 | 5857 | AN10854 |
| 1433 | CONTIG113 | 161038 | 161389 | 1.62 | 5.88E-02 | transcription_start_site | - | 157935 | 157935 | -3278 | 5858 | AN10854 |
| 1433 | CONTIG113 | 161038 | 161389 | 1.62 | 5.88E-02 | transcription_start_site | - | 157740 | 157740 | -3473 | 5859 | AN10854 |
| 1433 | CONTIG113 | 161038 | 161389 | 1.62 | 5.88E-02 | transcription_start_site | - | 157534 | 157534 | -3679 | 5860 | AN10854 |
| 1433 | CONTIG113 | 161038 | 161389 | 1.62 | 5.88E-02 | transcription_start_site | - | 157126 | 157126 | -4087 | 5861 | AN10854 |
| 1433 | CONTIG113 | 161038 | 161389 | 1.62 | 5.88E-02 | transcription_start_site | - | 156965 | 156965 | -4248 | 5862 | AN10854 |
| 1868 | CONTIG113 | 158253 | 159052 | 1.43 | 1.08E-01 | transcription_start_site | - | 158541 | 158541 | -111  | 5857 | AN10854 |
| 1868 | CONTIG113 | 158253 | 159052 | 1.43 | 1.08E-01 | transcription_start_site | - | 157935 | 157935 | -717  | 5858 | AN10854 |
| 1868 | CONTIG113 | 158253 | 159052 | 1.43 | 1.08E-01 | transcription_start_site | - | 157740 | 157740 | -912  | 5859 | AN10854 |
| 1868 | CONTIG113 | 158253 | 159052 | 1.43 | 1.08E-01 | transcription_start_site | - | 157534 | 157534 | -1118 | 5860 | AN10854 |
| 1868 | CONTIG113 | 158253 | 159052 | 1.43 | 1.08E-01 | transcription_start_site | - | 157126 | 157126 | -1526 | 5861 | AN10854 |
| 1868 | CONTIG113 | 158253 | 159052 | 1.43 | 1.08E-01 | transcription_start_site | - | 156965 | 156965 | -1687 | 5862 | AN10854 |
| 732  | CONTIG113 | 174385 | 174804 | 2.17 | 8.81E-03 | transcription_start_site | - | 169414 | 169414 | -5180 | 5863 | AN10855 |
| 732  | CONTIG113 | 174385 | 174804 | 2.17 | 8.81E-03 | transcription_start_site | - | 170593 | 170593 | -4001 | 5871 | AN10857 |
| 77   | CONTIG113 | 73427  | 73851  | 3.3  | 0.00E+00 | transcription_start_site | - | 69089  | 69089  | -4550 | 5874 | AN10859 |
| 336  | CONTIG113 | 73892  | 74466  | 2.71 | 1.01E-03 | transcription_start_site | - | 69089  | 69089  | -5090 | 5874 | AN10859 |
| 1335 | CONTIG113 | 70206  | 70475  | 1.67 | 5.22E-02 | transcription_start_site | - | 69089  | 69089  | -1251 | 5874 | AN10859 |
| 1433 | CONTIG113 | 161038 | 161389 | 1.62 | 5.88E-02 | transcription_start_site | - | 160180 | 160180 | -1033 | 5875 | AN10860 |
| 1433 | CONTIG113 | 161038 | 161389 | 1.62 | 5.88E-02 | transcription_start_site | - | 159835 | 159835 | -1378 | 5876 | AN10860 |
| 1868 | CONTIG113 | 158253 | 159052 | 1.43 | 1.08E-01 | transcription_start_site | - | 159835 | 159835 | 1182  | 5876 | AN10860 |
| 2985 | CONTIG115 | 26196  | 26845  | 0.93 | 1.50E-01 | transcription_start_site | - | 25029  | 25029  | -1491 | 5877 | AN10861 |
| 2985 | CONTIG115 | 26196  | 26845  | 0.93 | 1.50E-01 | transcription_start_site | - | 24578  | 24578  | -1942 | 5878 | AN10861 |
| 2985 | CONTIG115 | 26196  | 26845  | 0.93 | 1.50E-01 | transcription_start_site | - | 24306  | 24306  | -2214 | 5879 | AN10861 |

|      |           |        |        |      |          |                          |   |        |        |       |      |         |
|------|-----------|--------|--------|------|----------|--------------------------|---|--------|--------|-------|------|---------|
| 2985 | CONTIG115 | 26196  | 26845  | 0.93 | 1.50E-01 | transcription_start_site | - | 24073  | 24073  | -2447 | 5880 | AN10861 |
| 2555 | CONTIG115 | 69164  | 69593  | 1.18 | 5.88E-02 | transcription_start_site | + | 69306  | 69306  | 72    | 5881 | AN10862 |
| 2555 | CONTIG115 | 69164  | 69593  | 1.18 | 5.88E-02 | transcription_start_site | + | 70118  | 70118  | -739  | 5882 | AN10862 |
| 2555 | CONTIG115 | 69164  | 69593  | 1.18 | 5.88E-02 | transcription_start_site | + | 70400  | 70400  | -1021 | 5883 | AN10862 |
| 2555 | CONTIG115 | 69164  | 69593  | 1.18 | 5.88E-02 | transcription_start_site | + | 70703  | 70703  | -1324 | 5884 | AN10862 |
| 2555 | CONTIG115 | 69164  | 69593  | 1.18 | 5.88E-02 | transcription_start_site | + | 74115  | 74115  | -4736 | 5885 | AN10863 |
| 2555 | CONTIG115 | 69164  | 69593  | 1.18 | 5.88E-02 | transcription_start_site | + | 74196  | 74196  | -4817 | 5886 | AN10863 |
| 2555 | CONTIG115 | 69164  | 69593  | 1.18 | 5.88E-02 | transcription_start_site | + | 71548  | 71548  | -2169 | 5888 | AN10864 |
| 2555 | CONTIG115 | 69164  | 69593  | 1.18 | 5.88E-02 | transcription_start_site | + | 72148  | 72148  | -2769 | 5889 | AN10864 |
| 2555 | CONTIG115 | 69164  | 69593  | 1.18 | 5.88E-02 | transcription_start_site | + | 72798  | 72798  | -3419 | 5890 | AN10865 |
| 2555 | CONTIG115 | 69164  | 69593  | 1.18 | 5.88E-02 | transcription_start_site | + | 72889  | 72889  | -3510 | 5891 | AN10865 |
| 2555 | CONTIG115 | 69164  | 69593  | 1.18 | 5.88E-02 | transcription_start_site | + | 73164  | 73164  | -3785 | 5892 | AN10865 |
| 2555 | CONTIG115 | 69164  | 69593  | 1.18 | 5.88E-02 | transcription_start_site | + | 73385  | 73385  | -4006 | 5893 | AN10865 |
| 2985 | CONTIG115 | 26196  | 26845  | 0.93 | 1.50E-01 | transcription_start_site | - | 26875  | 26875  | 354   | 5894 | AN10866 |
| 2985 | CONTIG115 | 26196  | 26845  | 0.93 | 1.50E-01 | transcription_start_site | - | 25851  | 25851  | -669  | 5895 | AN10866 |
| 380  | CONTIG16  | 139521 | 139942 | 2.63 | 0.00E+00 | transcription_start_site | - | 134762 | 134762 | -4969 | 5906 | AN1087  |
| 1954 | CONTIG16  | 134716 | 135051 | 1.39 | 1.07E-01 | transcription_start_site | - | 134762 | 134762 | -121  | 5906 | AN1087  |
| 1954 | CONTIG16  | 134716 | 135051 | 1.39 | 1.07E-01 | transcription_start_site | - | 133325 | 133325 | -1558 | 5907 | AN1087  |
| 577  | CONTIG117 | 39976  | 40401  | 2.34 | 2.22E-03 | transcription_start_site | + | 39151  | 39151  | 1037  | 5918 | AN10871 |
| 1463 | CONTIG117 | 59269  | 59625  | 1.61 | 4.36E-02 | transcription_start_site | - | 58697  | 58697  | -750  | 5919 | AN10872 |
| 1463 | CONTIG117 | 59269  | 59625  | 1.61 | 4.36E-02 | transcription_start_site | - | 57053  | 57053  | -2394 | 5920 | AN10872 |
| 1463 | CONTIG117 | 59269  | 59625  | 1.61 | 4.36E-02 | transcription_start_site | - | 56908  | 56908  | -2539 | 5921 | AN10872 |
| 1463 | CONTIG117 | 59269  | 59625  | 1.61 | 4.36E-02 | transcription_start_site | - | 56415  | 56415  | -3032 | 5943 | AN10877 |
| 1463 | CONTIG117 | 59269  | 59625  | 1.61 | 4.36E-02 | transcription_start_site | - | 56250  | 56250  | -3197 | 5944 | AN10877 |
| 1954 | CONTIG16  | 134716 | 135051 | 1.39 | 1.07E-01 | transcription_start_site | + | 135191 | 135191 | -307  | 5950 | AN1088  |
| 1954 | CONTIG16  | 134716 | 135051 | 1.39 | 1.07E-01 | transcription_start_site | + | 135403 | 135403 | -519  | 5951 | AN1088  |
| 1954 | CONTIG16  | 134716 | 135051 | 1.39 | 1.07E-01 | transcription_start_site | + | 135655 | 135655 | -771  | 5952 | AN1088  |
| 577  | CONTIG117 | 39976  | 40401  | 2.34 | 2.22E-03 | transcription_start_site | + | 39648  | 39648  | 540   | 5956 | AN10881 |
| 577  | CONTIG117 | 39976  | 40401  | 2.34 | 2.22E-03 | transcription_start_site | + | 39514  | 39514  | 674   | 5955 | AN10881 |
| 577  | CONTIG117 | 39976  | 40401  | 2.34 | 2.22E-03 | transcription_start_site | + | 39235  | 39235  | 953   | 5954 | AN10881 |
| 2027 | CONTIG118 | 61371  | 62169  | 1.36 | 1.23E-02 | transcription_start_site | + | 63563  | 63563  | -1793 | 5970 | AN10885 |
| 2027 | CONTIG118 | 61371  | 62169  | 1.36 | 1.23E-02 | transcription_start_site | + | 65157  | 65157  | -3387 | 5971 | AN10885 |
| 1761 | CONTIG118 | 66829  | 67343  | 1.47 | 9.21E-03 | transcription_start_site | + | 71056  | 71056  | -3970 | 5972 | AN10886 |
| 1761 | CONTIG118 | 66829  | 67343  | 1.47 | 9.21E-03 | transcription_start_site | + | 71286  | 71286  | -4200 | 5973 | AN10886 |
| 1761 | CONTIG118 | 66829  | 67343  | 1.47 | 9.21E-03 | transcription_start_site | + | 71378  | 71378  | -4292 | 5974 | AN10886 |
| 1761 | CONTIG118 | 66829  | 67343  | 1.47 | 9.21E-03 | transcription_start_site | + | 71521  | 71521  | -4435 | 5975 | AN10886 |
| 1761 | CONTIG118 | 66829  | 67343  | 1.47 | 9.21E-03 | transcription_start_site | + | 71991  | 71991  | -4905 | 5976 | AN10886 |
| 2863 | CONTIG118 | 71778  | 72127  | 1.03 | 1.25E-01 | transcription_start_site | + | 71991  | 71991  | -38   | 5976 | AN10886 |
| 2863 | CONTIG118 | 71778  | 72127  | 1.03 | 1.25E-01 | transcription_start_site | + | 71521  | 71521  | 431   | 5975 | AN10886 |
| 2863 | CONTIG118 | 71778  | 72127  | 1.03 | 1.25E-01 | transcription_start_site | + | 71378  | 71378  | 574   | 5974 | AN10886 |
| 2863 | CONTIG118 | 71778  | 72127  | 1.03 | 1.25E-01 | transcription_start_site | + | 72582  | 72582  | -629  | 5977 | AN10886 |
| 2863 | CONTIG118 | 71778  | 72127  | 1.03 | 1.25E-01 | transcription_start_site | + | 71286  | 71286  | 666   | 5973 | AN10886 |
| 2863 | CONTIG118 | 71778  | 72127  | 1.03 | 1.25E-01 | transcription_start_site | + | 71056  | 71056  | 896   | 5972 | AN10886 |
| 2963 | CONTIG118 | 69153  | 69967  | 0.95 | 1.50E-01 | transcription_start_site | + | 71056  | 71056  | -1496 | 5972 | AN10886 |
| 2963 | CONTIG118 | 69153  | 69967  | 0.95 | 1.50E-01 | transcription_start_site | + | 71286  | 71286  | -1726 | 5973 | AN10886 |
| 2963 | CONTIG118 | 69153  | 69967  | 0.95 | 1.50E-01 | transcription_start_site | + | 71378  | 71378  | -1818 | 5974 | AN10886 |
| 2963 | CONTIG118 | 69153  | 69967  | 0.95 | 1.50E-01 | transcription_start_site | + | 71521  | 71521  | -1961 | 5975 | AN10886 |
| 2963 | CONTIG118 | 69153  | 69967  | 0.95 | 1.50E-01 | transcription_start_site | + | 71991  | 71991  | -2431 | 5976 | AN10886 |
| 2963 | CONTIG118 | 69153  | 69967  | 0.95 | 1.50E-01 | transcription_start_site | + | 72582  | 72582  | -3022 | 5977 | AN10886 |
| 875  | CONTIG118 | 74403  | 74775  | 2.02 | 1.01E-03 | transcription_start_site | + | 73939  | 73939  | 650   | 5980 | AN10887 |
| 2863 | CONTIG118 | 71778  | 72127  | 1.03 | 1.25E-01 | transcription_start_site | + | 73040  | 73040  | -1087 | 5978 | AN10887 |
| 2863 | CONTIG118 | 71778  | 72127  | 1.03 | 1.25E-01 | transcription_start_site | + | 73328  | 73328  | -1375 | 5979 | AN10887 |
| 2863 | CONTIG118 | 71778  | 72127  | 1.03 | 1.25E-01 | transcription_start_site | + | 73939  | 73939  | -1986 | 5980 | AN10887 |
| 2963 | CONTIG118 | 69153  | 69967  | 0.95 | 1.50E-01 | transcription_start_site | + | 73040  | 73040  | -3480 | 5978 | AN10887 |
| 2963 | CONTIG118 | 69153  | 69967  | 0.95 | 1.50E-01 | transcription_start_site | + | 73328  | 73328  | -3768 | 5979 | AN10887 |
| 2963 | CONTIG118 | 69153  | 69967  | 0.95 | 1.50E-01 | transcription_start_site | + | 73939  | 73939  | -4379 | 5980 | AN10887 |
| 2965 | CONTIG118 | 19136  | 19402  | 0.95 | 1.66E-01 | transcription_start_site | + | 18859  | 18859  | 410   | 5984 | AN10888 |

|      |           |        |        |      |          |                          |   |        |        |       |      |         |
|------|-----------|--------|--------|------|----------|--------------------------|---|--------|--------|-------|------|---------|
| 2965 | CONTIG118 | 19136  | 19402  | 0.95 | 1.66E-01 | transcription_start_site | + | 18555  | 18555  | 714   | 5983 | AN10888 |
| 380  | CONTIG16  | 139521 | 139942 | 2.63 | 0.00E+00 | transcription_start_site | - | 138614 | 138614 | -1117 | 5987 | AN1089  |
| 380  | CONTIG16  | 139521 | 139942 | 2.63 | 0.00E+00 | transcription_start_site | - | 137831 | 137831 | -1900 | 5988 | AN1089  |
| 380  | CONTIG16  | 139521 | 139942 | 2.63 | 0.00E+00 | transcription_start_site | - | 136718 | 136718 | -3013 | 5989 | AN1089  |
| 2027 | CONTIG118 | 61371  | 62169  | 1.36 | 1.23E-02 | transcription_start_site | + | 63021  | 63021  | -1251 | 5990 | AN10890 |
| 2027 | CONTIG118 | 61371  | 62169  | 1.36 | 1.23E-02 | transcription_start_site | + | 63201  | 63201  | -1431 | 5991 | AN10890 |
| 620  | CONTIG119 | 20027  | 20316  | 2.28 | 9.51E-04 | transcription_start_site | + | 25077  | 25077  | -4905 | 5992 | AN10891 |
| 620  | CONTIG119 | 20027  | 20316  | 2.28 | 9.51E-04 | transcription_start_site | + | 25257  | 25257  | -5085 | 5993 | AN10891 |
| 1670 | CONTIG119 | 34893  | 35915  | 1.51 | 3.08E-02 | transcription_start_site | + | 38173  | 38173  | -2769 | 5996 | AN10892 |
| 1670 | CONTIG119 | 34893  | 35915  | 1.51 | 3.08E-02 | transcription_start_site | + | 38466  | 38466  | -3062 | 5997 | AN10892 |
| 1670 | CONTIG119 | 34893  | 35915  | 1.51 | 3.08E-02 | transcription_start_site | + | 39167  | 39167  | -3763 | 5998 | AN10892 |
| 1764 | CONTIG119 | 36228  | 37402  | 1.47 | 2.18E-02 | transcription_start_site | + | 38173  | 38173  | -1358 | 5996 | AN10892 |
| 1764 | CONTIG119 | 36228  | 37402  | 1.47 | 2.18E-02 | transcription_start_site | + | 38466  | 38466  | -1651 | 5997 | AN10892 |
| 1764 | CONTIG119 | 36228  | 37402  | 1.47 | 2.18E-02 | transcription_start_site | + | 39167  | 39167  | -2352 | 5998 | AN10892 |
| 1857 | CONTIG119 | 33828  | 34257  | 1.43 | 4.36E-02 | transcription_start_site | + | 38173  | 38173  | -4130 | 5996 | AN10892 |
| 1857 | CONTIG119 | 33828  | 34257  | 1.43 | 4.36E-02 | transcription_start_site | + | 38466  | 38466  | -4423 | 5997 | AN10892 |
| 1857 | CONTIG119 | 33828  | 34257  | 1.43 | 4.36E-02 | transcription_start_site | + | 39167  | 39167  | -5124 | 5998 | AN10892 |
| 2319 | CONTIG119 | 33018  | 33732  | 1.26 | 8.01E-02 | transcription_start_site | + | 38173  | 38173  | -4798 | 5996 | AN10892 |
| 2319 | CONTIG119 | 33018  | 33732  | 1.26 | 8.01E-02 | transcription_start_site | + | 38466  | 38466  | -5091 | 5997 | AN10892 |
| 2659 | CONTIG119 | 37578  | 38302  | 1.14 | 1.07E-01 | transcription_start_site | + | 38173  | 38173  | -233  | 5996 | AN10892 |
| 2659 | CONTIG119 | 37578  | 38302  | 1.14 | 1.07E-01 | transcription_start_site | + | 38466  | 38466  | -526  | 5997 | AN10892 |
| 2659 | CONTIG119 | 37578  | 38302  | 1.14 | 1.07E-01 | transcription_start_site | + | 39167  | 39167  | -1227 | 5998 | AN10892 |
| 2815 | CONTIG119 | 132903 | 133262 | 1.06 | 1.66E-01 | transcription_start_site | - | 133991 | 133991 | 908   | 6008 | AN10894 |
| 2815 | CONTIG119 | 132903 | 133262 | 1.06 | 1.66E-01 | transcription_start_site | - | 134236 | 134236 | 1153  | 6007 | AN10894 |
| 1670 | CONTIG119 | 34893  | 35915  | 1.51 | 3.08E-02 | transcription_start_site | + | 37034  | 37034  | -1630 | 6013 | AN10896 |
| 1670 | CONTIG119 | 34893  | 35915  | 1.51 | 3.08E-02 | transcription_start_site | + | 37239  | 37239  | -1835 | 6014 | AN10896 |
| 1764 | CONTIG119 | 36228  | 37402  | 1.47 | 2.18E-02 | transcription_start_site | + | 37034  | 37034  | -219  | 6013 | AN10896 |
| 1764 | CONTIG119 | 36228  | 37402  | 1.47 | 2.18E-02 | transcription_start_site | + | 37239  | 37239  | -424  | 6014 | AN10896 |
| 1857 | CONTIG119 | 33828  | 34257  | 1.43 | 4.36E-02 | transcription_start_site | + | 37034  | 37034  | -2991 | 6013 | AN10896 |
| 1857 | CONTIG119 | 33828  | 34257  | 1.43 | 4.36E-02 | transcription_start_site | + | 37239  | 37239  | -3196 | 6014 | AN10896 |
| 2319 | CONTIG119 | 33018  | 33732  | 1.26 | 8.01E-02 | transcription_start_site | + | 37034  | 37034  | -3659 | 6013 | AN10896 |
| 2319 | CONTIG119 | 33018  | 33732  | 1.26 | 8.01E-02 | transcription_start_site | + | 37239  | 37239  | -3864 | 6014 | AN10896 |
| 2659 | CONTIG119 | 37578  | 38302  | 1.14 | 1.07E-01 | transcription_start_site | + | 37239  | 37239  | 701   | 6014 | AN10896 |
| 2659 | CONTIG119 | 37578  | 38302  | 1.14 | 1.07E-01 | transcription_start_site | + | 37034  | 37034  | 906   | 6013 | AN10896 |
| 620  | CONTIG119 | 20027  | 20316  | 2.28 | 9.51E-04 | transcription_start_site | + | 22427  | 22427  | -2255 | 6015 | AN10897 |
| 620  | CONTIG119 | 20027  | 20316  | 2.28 | 9.51E-04 | transcription_start_site | + | 22827  | 22827  | -2655 | 6016 | AN10897 |
| 620  | CONTIG119 | 20027  | 20316  | 2.28 | 9.51E-04 | transcription_start_site | + | 23210  | 23210  | -3038 | 6017 | AN10897 |
| 620  | CONTIG119 | 20027  | 20316  | 2.28 | 9.51E-04 | transcription_start_site | + | 24452  | 24452  | -4280 | 6018 | AN10897 |
| 620  | CONTIG119 | 20027  | 20316  | 2.28 | 9.51E-04 | transcription_start_site | + | 24641  | 24641  | -4469 | 6019 | AN10897 |
| 620  | CONTIG119 | 20027  | 20316  | 2.28 | 9.51E-04 | transcription_start_site | + | 19901  | 19901  | 270   | 6020 | AN10898 |
| 620  | CONTIG119 | 20027  | 20316  | 2.28 | 9.51E-04 | transcription_start_site | + | 20672  | 20672  | -500  | 6021 | AN10898 |
| 620  | CONTIG119 | 20027  | 20316  | 2.28 | 9.51E-04 | transcription_start_site | + | 20982  | 20982  | -810  | 6022 | AN10898 |
| 620  | CONTIG119 | 20027  | 20316  | 2.28 | 9.51E-04 | transcription_start_site | + | 21324  | 21324  | -1152 | 6023 | AN10898 |
| 620  | CONTIG119 | 20027  | 20316  | 2.28 | 9.51E-04 | transcription_start_site | + | 21661  | 21661  | -1489 | 6024 | AN10898 |
| 620  | CONTIG119 | 20027  | 20316  | 2.28 | 9.51E-04 | transcription_start_site | + | 21773  | 21773  | -1601 | 6025 | AN10898 |
| 2815 | CONTIG119 | 132903 | 133262 | 1.06 | 1.66E-01 | transcription_start_site | - | 133313 | 133313 | 230   | 6026 | AN10899 |
| 2815 | CONTIG119 | 132903 | 133262 | 1.06 | 1.66E-01 | transcription_start_site | - | 132473 | 132473 | -609  | 6027 | AN10899 |
| 1494 | CONTIG16  | 144616 | 144885 | 1.59 | 6.84E-02 | transcription_start_site | - | 142019 | 142019 | -2731 | 6028 | AN1090  |
| 1494 | CONTIG16  | 144616 | 144885 | 1.59 | 6.84E-02 | transcription_start_site | - | 141873 | 141873 | -2877 | 6029 | AN1090  |
| 1494 | CONTIG16  | 144616 | 144885 | 1.59 | 6.84E-02 | transcription_start_site | - | 141692 | 141692 | -3058 | 6030 | AN1090  |
| 436  | CONTIG122 | 6155   | 6446   | 2.54 | 5.20E-03 | transcription_start_site | - | 6468   | 6468   | 167   | 6032 | AN10900 |
| 6    | CONTIG122 | 101251 | 101600 | 3.84 | 0.00E+00 | transcription_start_site | - | 101980 | 101980 | 554   | 6037 | AN10902 |
| 6    | CONTIG122 | 101251 | 101600 | 3.84 | 0.00E+00 | transcription_start_site | - | 102336 | 102336 | 910   | 6036 | AN10902 |
| 34   | CONTIG122 | 102696 | 103185 | 3.52 | 0.00E+00 | transcription_start_site | - | 102735 | 102735 | -205  | 6035 | AN10902 |
| 34   | CONTIG122 | 102696 | 103185 | 3.52 | 0.00E+00 | transcription_start_site | - | 102336 | 102336 | -604  | 6036 | AN10902 |
| 34   | CONTIG122 | 102696 | 103185 | 3.52 | 0.00E+00 | transcription_start_site | - | 101980 | 101980 | -960  | 6037 | AN10902 |
| 121  | CONTIG122 | 101866 | 102360 | 3.14 | 5.64E-04 | transcription_start_site | - | 101980 | 101980 | -133  | 6037 | AN10902 |



|      |           |        |        |      |          |                          |   |        |        |       |      |         |
|------|-----------|--------|--------|------|----------|--------------------------|---|--------|--------|-------|------|---------|
| 121  | CONTIG122 | 101866 | 102360 | 3.14 | 5.64E-04 | transcription_start_site | - | 102336 | 102336 | 223   | 6036 | AN10902 |
| 121  | CONTIG122 | 101866 | 102360 | 3.14 | 5.64E-04 | transcription_start_site | - | 102735 | 102735 | 622   | 6035 | AN10902 |
| 184  | CONTIG122 | 106971 | 107315 | 2.98 | 1.01E-03 | transcription_start_site | - | 102735 | 102735 | -4408 | 6035 | AN10902 |
| 184  | CONTIG122 | 106971 | 107315 | 2.98 | 1.01E-03 | transcription_start_site | - | 102336 | 102336 | -4807 | 6036 | AN10902 |
| 184  | CONTIG122 | 106971 | 107315 | 2.98 | 1.01E-03 | transcription_start_site | - | 101980 | 101980 | -5163 | 6037 | AN10902 |
| 503  | CONTIG122 | 104271 | 106175 | 2.44 | 0.00E+00 | transcription_start_site | - | 102735 | 102735 | -2488 | 6035 | AN10902 |
| 503  | CONTIG122 | 104271 | 106175 | 2.44 | 0.00E+00 | transcription_start_site | - | 102336 | 102336 | -2887 | 6036 | AN10902 |
| 503  | CONTIG122 | 104271 | 106175 | 2.44 | 0.00E+00 | transcription_start_site | - | 101980 | 101980 | -3243 | 6037 | AN10902 |
| 436  | CONTIG122 | 6155   | 6446   | 2.54 | 5.20E-03 | transcription_start_site | - | 5899   | 5899   | -401  | 6040 | AN10904 |
| 436  | CONTIG122 | 6155   | 6446   | 2.54 | 5.20E-03 | transcription_start_site | - | 5697   | 5697   | -603  | 6041 | AN10904 |
| 436  | CONTIG122 | 6155   | 6446   | 2.54 | 5.20E-03 | transcription_start_site | - | 5574   | 5574   | -726  | 6042 | AN10904 |
| 436  | CONTIG122 | 6155   | 6446   | 2.54 | 5.20E-03 | transcription_start_site | - | 5279   | 5279   | -1021 | 6043 | AN10904 |
| 436  | CONTIG122 | 6155   | 6446   | 2.54 | 5.20E-03 | transcription_start_site | - | 4481   | 4481   | -1819 | 6044 | AN10904 |
| 436  | CONTIG122 | 6155   | 6446   | 2.54 | 5.20E-03 | transcription_start_site | - | 4322   | 4322   | -1978 | 6045 | AN10904 |
| 436  | CONTIG122 | 6155   | 6446   | 2.54 | 5.20E-03 | transcription_start_site | - | 4081   | 4081   | -2219 | 6046 | AN10904 |
| 436  | CONTIG122 | 6155   | 6446   | 2.54 | 5.20E-03 | transcription_start_site | - | 3714   | 3714   | -2586 | 6047 | AN10904 |
| 436  | CONTIG122 | 6155   | 6446   | 2.54 | 5.20E-03 | transcription_start_site | - | 3588   | 3588   | -2712 | 6048 | AN10904 |
| 436  | CONTIG122 | 6155   | 6446   | 2.54 | 5.20E-03 | transcription_start_site | - | 3489   | 3489   | -2811 | 6049 | AN10904 |
| 436  | CONTIG122 | 6155   | 6446   | 2.54 | 5.20E-03 | transcription_start_site | - | 3331   | 3331   | -2969 | 6050 | AN10904 |
| 436  | CONTIG122 | 6155   | 6446   | 2.54 | 5.20E-03 | transcription_start_site | - | 3161   | 3161   | -3139 | 6051 | AN10904 |
| 436  | CONTIG122 | 6155   | 6446   | 2.54 | 5.20E-03 | transcription_start_site | - | 2931   | 2931   | -3369 | 6052 | AN10904 |
| 436  | CONTIG122 | 6155   | 6446   | 2.54 | 5.20E-03 | transcription_start_site | - | 2433   | 2433   | -3867 | 6053 | AN10904 |
| 6    | CONTIG122 | 101251 | 101600 | 3.84 | 0.00E+00 | transcription_start_site | - | 101075 | 101075 | -350  | 6054 | AN10905 |
| 6    | CONTIG122 | 101251 | 101600 | 3.84 | 0.00E+00 | transcription_start_site | - | 100775 | 100775 | -650  | 6055 | AN10905 |
| 6    | CONTIG122 | 101251 | 101600 | 3.84 | 0.00E+00 | transcription_start_site | - | 100491 | 100491 | -934  | 6056 | AN10905 |
| 6    | CONTIG122 | 101251 | 101600 | 3.84 | 0.00E+00 | transcription_start_site | - | 99902  | 99902  | -1523 | 6057 | AN10905 |
| 6    | CONTIG122 | 101251 | 101600 | 3.84 | 0.00E+00 | transcription_start_site | - | 99746  | 99746  | -1679 | 6058 | AN10905 |
| 6    | CONTIG122 | 101251 | 101600 | 3.84 | 0.00E+00 | transcription_start_site | - | 99279  | 99279  | -2146 | 6059 | AN10905 |
| 34   | CONTIG122 | 102696 | 103185 | 3.52 | 0.00E+00 | transcription_start_site | - | 101075 | 101075 | -1865 | 6054 | AN10905 |
| 34   | CONTIG122 | 102696 | 103185 | 3.52 | 0.00E+00 | transcription_start_site | - | 100775 | 100775 | -2165 | 6055 | AN10905 |
| 34   | CONTIG122 | 102696 | 103185 | 3.52 | 0.00E+00 | transcription_start_site | - | 100491 | 100491 | -2449 | 6056 | AN10905 |
| 34   | CONTIG122 | 102696 | 103185 | 3.52 | 0.00E+00 | transcription_start_site | - | 99902  | 99902  | -3038 | 6057 | AN10905 |
| 34   | CONTIG122 | 102696 | 103185 | 3.52 | 0.00E+00 | transcription_start_site | - | 99746  | 99746  | -3194 | 6058 | AN10905 |
| 34   | CONTIG122 | 102696 | 103185 | 3.52 | 0.00E+00 | transcription_start_site | - | 99279  | 99279  | -3661 | 6059 | AN10905 |
| 121  | CONTIG122 | 101866 | 102360 | 3.14 | 5.64E-04 | transcription_start_site | - | 101075 | 101075 | -1038 | 6054 | AN10905 |
| 121  | CONTIG122 | 101866 | 102360 | 3.14 | 5.64E-04 | transcription_start_site | - | 100775 | 100775 | -1338 | 6055 | AN10905 |
| 121  | CONTIG122 | 101866 | 102360 | 3.14 | 5.64E-04 | transcription_start_site | - | 100491 | 100491 | -1622 | 6056 | AN10905 |
| 121  | CONTIG122 | 101866 | 102360 | 3.14 | 5.64E-04 | transcription_start_site | - | 99902  | 99902  | -2211 | 6057 | AN10905 |
| 121  | CONTIG122 | 101866 | 102360 | 3.14 | 5.64E-04 | transcription_start_site | - | 99746  | 99746  | -2367 | 6058 | AN10905 |
| 121  | CONTIG122 | 101866 | 102360 | 3.14 | 5.64E-04 | transcription_start_site | - | 99279  | 99279  | -2834 | 6059 | AN10905 |
| 503  | CONTIG122 | 104271 | 106175 | 2.44 | 0.00E+00 | transcription_start_site | - | 101075 | 101075 | -4148 | 6054 | AN10905 |
| 503  | CONTIG122 | 104271 | 106175 | 2.44 | 0.00E+00 | transcription_start_site | - | 100775 | 100775 | -4448 | 6055 | AN10905 |
| 503  | CONTIG122 | 104271 | 106175 | 2.44 | 0.00E+00 | transcription_start_site | - | 100491 | 100491 | -4732 | 6056 | AN10905 |
| 503  | CONTIG122 | 104271 | 106175 | 2.44 | 0.00E+00 | transcription_start_site | - | 99902  | 99902  | -5321 | 6057 | AN10905 |
| 503  | CONTIG122 | 104271 | 106175 | 2.44 | 0.00E+00 | transcription_start_site | - | 99746  | 99746  | -5477 | 6058 | AN10905 |
| 503  | CONTIG122 | 104271 | 106175 | 2.44 | 0.00E+00 | transcription_start_site | - | 99279  | 99279  | -5944 | 6059 | AN10905 |
| 848  | CONTIG122 | 100051 | 100625 | 2.06 | 2.62E-02 | transcription_start_site | - | 100491 | 100491 | 153   | 6056 | AN10905 |
| 848  | CONTIG122 | 100051 | 100625 | 2.06 | 2.62E-02 | transcription_start_site | - | 99902  | 99902  | -436  | 6057 | AN10905 |
| 848  | CONTIG122 | 100051 | 100625 | 2.06 | 2.62E-02 | transcription_start_site | - | 100775 | 100775 | 437   | 6055 | AN10905 |
| 848  | CONTIG122 | 100051 | 100625 | 2.06 | 2.62E-02 | transcription_start_site | - | 99746  | 99746  | -592  | 6058 | AN10905 |
| 848  | CONTIG122 | 100051 | 100625 | 2.06 | 2.62E-02 | transcription_start_site | - | 101075 | 101075 | 737   | 6054 | AN10905 |
| 848  | CONTIG122 | 100051 | 100625 | 2.06 | 2.62E-02 | transcription_start_site | - | 99279  | 99279  | -1059 | 6059 | AN10905 |
| 1357 | CONTIG123 | 7888   | 8242   | 1.66 | 4.36E-02 | transcription_start_site | - | 7646   | 7646   | -419  | 6060 | AN10906 |
| 1357 | CONTIG123 | 7888   | 8242   | 1.66 | 4.36E-02 | transcription_start_site | - | 6985   | 6985   | -1080 | 6061 | AN10906 |
| 1357 | CONTIG123 | 7888   | 8242   | 1.66 | 4.36E-02 | transcription_start_site | - | 6748   | 6748   | -1317 | 6062 | AN10906 |
| 1357 | CONTIG123 | 7888   | 8242   | 1.66 | 4.36E-02 | transcription_start_site | - | 6181   | 6181   | -1884 | 6063 | AN10906 |
| 1127 | CONTIG123 | 22129  | 22493  | 1.81 | 2.62E-02 | transcription_start_site | - | 23270  | 23270  | 959   | 6074 | AN10908 |

|      |           |        |        |      |          |                          |   |        |        |       |      |         |
|------|-----------|--------|--------|------|----------|--------------------------|---|--------|--------|-------|------|---------|
| 1127 | CONTIG123 | 22129  | 22493  | 1.81 | 2.62E-02 | transcription_start_site | - | 23426  | 23426  | 1115  | 6073 | AN10908 |
| 709  | CONTIG123 | 58357  | 58776  | 2.19 | 6.61E-03 | transcription_start_site | + | 58353  | 58353  | 213   | 6076 | AN10909 |
| 709  | CONTIG123 | 58357  | 58776  | 2.19 | 6.61E-03 | transcription_start_site | + | 57501  | 57501  | 1065  | 6075 | AN10909 |
| 1203 | CONTIG123 | 55142  | 55476  | 1.76 | 3.08E-02 | transcription_start_site | + | 57501  | 57501  | -2192 | 6075 | AN10909 |
| 1203 | CONTIG123 | 55142  | 55476  | 1.76 | 3.08E-02 | transcription_start_site | + | 58353  | 58353  | -3044 | 6076 | AN10909 |
| 1204 | CONTIG123 | 68402  | 68686  | 1.76 | 3.08E-02 | transcription_start_site | - | 65591  | 65591  | -2953 | 6077 | AN10910 |
| 1204 | CONTIG123 | 68402  | 68686  | 1.76 | 3.08E-02 | transcription_start_site | - | 65336  | 65336  | -3208 | 6078 | AN10910 |
| 1204 | CONTIG123 | 68402  | 68686  | 1.76 | 3.08E-02 | transcription_start_site | - | 65233  | 65233  | -3311 | 6079 | AN10910 |
| 1204 | CONTIG123 | 68402  | 68686  | 1.76 | 3.08E-02 | transcription_start_site | - | 65049  | 65049  | -3495 | 6080 | AN10910 |
| 1204 | CONTIG123 | 68402  | 68686  | 1.76 | 3.08E-02 | transcription_start_site | - | 64422  | 64422  | -4122 | 6081 | AN10910 |
| 1204 | CONTIG123 | 68402  | 68686  | 1.76 | 3.08E-02 | transcription_start_site | - | 63944  | 63944  | -4600 | 6082 | AN10910 |
| 1204 | CONTIG123 | 68402  | 68686  | 1.76 | 3.08E-02 | transcription_start_site | - | 63772  | 63772  | -4772 | 6083 | AN10910 |
| 1204 | CONTIG123 | 68402  | 68686  | 1.76 | 3.08E-02 | transcription_start_site | - | 63593  | 63593  | -4951 | 6084 | AN10910 |
| 1357 | CONTIG123 | 7888   | 8242   | 1.66 | 4.36E-02 | transcription_start_site | - | 5149   | 5149   | -2916 | 6085 | AN10911 |
| 1357 | CONTIG123 | 7888   | 8242   | 1.66 | 4.36E-02 | transcription_start_site | - | 5024   | 5024   | -3041 | 6086 | AN10911 |
| 709  | CONTIG123 | 58357  | 58776  | 2.19 | 6.61E-03 | transcription_start_site | + | 58910  | 58910  | -343  | 6096 | AN10915 |
| 709  | CONTIG123 | 58357  | 58776  | 2.19 | 6.61E-03 | transcription_start_site | + | 59774  | 59774  | -1207 | 6097 | AN10915 |
| 1203 | CONTIG123 | 55142  | 55476  | 1.76 | 3.08E-02 | transcription_start_site | + | 58910  | 58910  | -3601 | 6096 | AN10915 |
| 1203 | CONTIG123 | 55142  | 55476  | 1.76 | 3.08E-02 | transcription_start_site | + | 59774  | 59774  | -4465 | 6097 | AN10915 |
| 50   | CONTIG123 | 72012  | 72731  | 3.42 | 0.00E+00 | transcription_start_site | - | 67061  | 67061  | -5310 | 6098 | AN10916 |
| 1204 | CONTIG123 | 68402  | 68686  | 1.76 | 3.08E-02 | transcription_start_site | - | 67061  | 67061  | -1483 | 6098 | AN10916 |
| 1204 | CONTIG123 | 68402  | 68686  | 1.76 | 3.08E-02 | transcription_start_site | - | 66832  | 66832  | -1712 | 6099 | AN10916 |
| 1204 | CONTIG123 | 68402  | 68686  | 1.76 | 3.08E-02 | transcription_start_site | - | 66632  | 66632  | -1912 | 6100 | AN10916 |
| 1204 | CONTIG123 | 68402  | 68686  | 1.76 | 3.08E-02 | transcription_start_site | - | 66476  | 66476  | -2068 | 6101 | AN10916 |
| 1204 | CONTIG123 | 68402  | 68686  | 1.76 | 3.08E-02 | transcription_start_site | - | 66384  | 66384  | -2160 | 6102 | AN10916 |
| 1204 | CONTIG123 | 68402  | 68686  | 1.76 | 3.08E-02 | transcription_start_site | - | 66158  | 66158  | -2386 | 6103 | AN10916 |
| 2386 | CONTIG123 | 71037  | 71841  | 1.24 | 1.59E-01 | transcription_start_site | - | 67061  | 67061  | -4378 | 6098 | AN10916 |
| 2386 | CONTIG123 | 71037  | 71841  | 1.24 | 1.59E-01 | transcription_start_site | - | 66832  | 66832  | -4607 | 6099 | AN10916 |
| 2386 | CONTIG123 | 71037  | 71841  | 1.24 | 1.59E-01 | transcription_start_site | - | 66632  | 66632  | -4807 | 6100 | AN10916 |
| 2386 | CONTIG123 | 71037  | 71841  | 1.24 | 1.59E-01 | transcription_start_site | - | 66476  | 66476  | -4963 | 6101 | AN10916 |
| 2386 | CONTIG123 | 71037  | 71841  | 1.24 | 1.59E-01 | transcription_start_site | - | 66384  | 66384  | -5055 | 6102 | AN10916 |
| 2386 | CONTIG123 | 71037  | 71841  | 1.24 | 1.59E-01 | transcription_start_site | - | 66158  | 66158  | -5281 | 6103 | AN10916 |
| 552  | CONTIG124 | 1513   | 1782   | 2.38 | 1.22E-03 | transcription_start_site | + | 4118   | 4118   | -2470 | 6104 | AN10917 |
| 552  | CONTIG124 | 1513   | 1782   | 2.38 | 1.22E-03 | transcription_start_site | + | 4219   | 4219   | -2571 | 6105 | AN10917 |
| 1344 | CONTIG126 | 19146  | 19400  | 1.66 | 2.67E-04 | transcription_start_site | - | 18249  | 18249  | -1024 | 6117 | AN10921 |
| 1344 | CONTIG126 | 19146  | 19400  | 1.66 | 2.67E-04 | transcription_start_site | - | 18191  | 18191  | -1082 | 6118 | AN10921 |
| 1251 | CONTIG127 | 62557  | 62838  | 1.72 | 1.80E-03 | transcription_start_site | + | 66374  | 66374  | -3676 | 6122 | AN10923 |
| 1714 | CONTIG127 | 69527  | 70031  | 1.49 | 7.85E-03 | transcription_start_site | + | 68955  | 68955  | 824   | 6126 | AN10925 |
| 1714 | CONTIG127 | 69527  | 70031  | 1.49 | 7.85E-03 | transcription_start_site | + | 68839  | 68839  | 940   | 6125 | AN10925 |
| 3028 | CONTIG127 | 18619  | 18958  | 0.86 | 1.66E-01 | transcription_start_site | + | 22761  | 22761  | -3972 | 6127 | AN10926 |
| 589  | CONTIG127 | 9092   | 9524   | 2.32 | 0.00E+00 | transcription_start_site | - | 4298   | 4298   | -5010 | 6132 | AN10928 |
| 589  | CONTIG127 | 9092   | 9524   | 2.32 | 0.00E+00 | transcription_start_site | - | 4167   | 4167   | -5141 | 6133 | AN10928 |
| 2402 | CONTIG128 | 10894  | 11458  | 1.23 | 5.88E-02 | transcription_start_site | + | 13760  | 13760  | -2584 | 6137 | AN10929 |
| 2402 | CONTIG128 | 10894  | 11458  | 1.23 | 5.88E-02 | transcription_start_site | + | 14286  | 14286  | -3110 | 6138 | AN10929 |
| 2402 | CONTIG128 | 10894  | 11458  | 1.23 | 5.88E-02 | transcription_start_site | + | 15329  | 15329  | -4153 | 6139 | AN10929 |
| 2988 | CONTIG128 | 15921  | 16645  | 0.93 | 1.93E-01 | transcription_start_site | + | 15329  | 15329  | 954   | 6139 | AN10929 |
| 1494 | CONTIG16  | 144616 | 144885 | 1.59 | 6.84E-02 | transcription_start_site | + | 149053 | 149053 | -4302 | 6140 | AN1093  |
| 1494 | CONTIG16  | 144616 | 144885 | 1.59 | 6.84E-02 | transcription_start_site | + | 149342 | 149342 | -4591 | 6141 | AN1093  |
| 1494 | CONTIG16  | 144616 | 144885 | 1.59 | 6.84E-02 | transcription_start_site | + | 149409 | 149409 | -4658 | 6142 | AN1093  |
| 1102 | CONTIG128 | 82745  | 83234  | 1.83 | 3.61E-03 | transcription_start_site | - | 79745  | 79745  | -3244 | 6144 | AN10930 |
| 1102 | CONTIG128 | 82745  | 83234  | 1.83 | 3.61E-03 | transcription_start_site | - | 79441  | 79441  | -3548 | 6145 | AN10930 |
| 1102 | CONTIG128 | 82745  | 83234  | 1.83 | 3.61E-03 | transcription_start_site | - | 79178  | 79178  | -3811 | 6146 | AN10930 |
| 1102 | CONTIG128 | 82745  | 83234  | 1.83 | 3.61E-03 | transcription_start_site | - | 78736  | 78736  | -4253 | 6147 | AN10930 |
| 1614 | CONTIG128 | 135232 | 135506 | 1.53 | 1.57E-02 | transcription_start_site | - | 131477 | 131477 | -3892 | 6152 | AN10932 |
| 1614 | CONTIG128 | 135232 | 135506 | 1.53 | 1.57E-02 | transcription_start_site | - | 131301 | 131301 | -4068 | 6153 | AN10932 |
| 1614 | CONTIG128 | 135232 | 135506 | 1.53 | 1.57E-02 | transcription_start_site | - | 130989 | 130989 | -4380 | 6154 | AN10932 |
| 2402 | CONTIG128 | 10894  | 11458  | 1.23 | 5.88E-02 | transcription_start_site | + | 16043  | 16043  | -4867 | 6162 | AN10934 |

|      |           |        |        |      |          |                          |   |        |        |       |      |         |
|------|-----------|--------|--------|------|----------|--------------------------|---|--------|--------|-------|------|---------|
| 2402 | CONTIG128 | 10894  | 11458  | 1.23 | 5.88E-02 | transcription_start_site | + | 16400  | 16400  | -5224 | 6163 | AN10934 |
| 2988 | CONTIG128 | 15921  | 16645  | 0.93 | 1.93E-01 | transcription_start_site | + | 16400  | 16400  | -117  | 6163 | AN10934 |
| 2988 | CONTIG128 | 15921  | 16645  | 0.93 | 1.93E-01 | transcription_start_site | + | 16043  | 16043  | 240   | 6162 | AN10934 |
| 1102 | CONTIG128 | 82745  | 83234  | 1.83 | 3.61E-03 | transcription_start_site | - | 77797  | 77797  | -5192 | 6165 | AN10936 |
| 2953 | CONTIG128 | 124366 | 124625 | 0.97 | 1.66E-01 | transcription_start_site | - | 119514 | 119514 | -4981 | 6167 | AN10937 |
| 2953 | CONTIG128 | 124366 | 124625 | 0.97 | 1.66E-01 | transcription_start_site | - | 120924 | 120924 | -3571 | 6170 | AN10938 |
| 2953 | CONTIG128 | 124366 | 124625 | 0.97 | 1.66E-01 | transcription_start_site | - | 120802 | 120802 | -3693 | 6171 | AN10938 |
| 2953 | CONTIG128 | 124366 | 124625 | 0.97 | 1.66E-01 | transcription_start_site | - | 120596 | 120596 | -3899 | 6172 | AN10938 |
| 2953 | CONTIG128 | 124366 | 124625 | 0.97 | 1.66E-01 | transcription_start_site | - | 119997 | 119997 | -4498 | 6173 | AN10938 |
| 762  | CONTIG16  | 155188 | 155752 | 2.14 | 4.81E-03 | transcription_start_site | - | 154989 | 154989 | -481  | 6178 | AN1094  |
| 762  | CONTIG16  | 155188 | 155752 | 2.14 | 4.81E-03 | transcription_start_site | - | 154577 | 154577 | -893  | 6179 | AN1094  |
| 762  | CONTIG16  | 155188 | 155752 | 2.14 | 4.81E-03 | transcription_start_site | - | 154184 | 154184 | -1286 | 6180 | AN1094  |
| 762  | CONTIG16  | 155188 | 155752 | 2.14 | 4.81E-03 | transcription_start_site | - | 153141 | 153141 | -2329 | 6181 | AN1094  |
| 968  | CONTIG16  | 156013 | 156366 | 1.94 | 2.12E-02 | transcription_start_site | - | 154989 | 154989 | -1200 | 6178 | AN1094  |
| 968  | CONTIG16  | 156013 | 156366 | 1.94 | 2.12E-02 | transcription_start_site | - | 154577 | 154577 | -1612 | 6179 | AN1094  |
| 968  | CONTIG16  | 156013 | 156366 | 1.94 | 2.12E-02 | transcription_start_site | - | 154184 | 154184 | -2005 | 6180 | AN1094  |
| 968  | CONTIG16  | 156013 | 156366 | 1.94 | 2.12E-02 | transcription_start_site | - | 153141 | 153141 | -3048 | 6181 | AN1094  |
| 1237 | CONTIG16  | 158268 | 158752 | 1.74 | 4.36E-02 | transcription_start_site | - | 154989 | 154989 | -3521 | 6178 | AN1094  |
| 1237 | CONTIG16  | 158268 | 158752 | 1.74 | 4.36E-02 | transcription_start_site | - | 154577 | 154577 | -3933 | 6179 | AN1094  |
| 1237 | CONTIG16  | 158268 | 158752 | 1.74 | 4.36E-02 | transcription_start_site | - | 154184 | 154184 | -4326 | 6180 | AN1094  |
| 2113 | CONTIG129 | 292730 | 293089 | 1.33 | 1.08E-01 | transcription_start_site | - | 291869 | 291869 | -1040 | 6203 | AN10945 |
| 2113 | CONTIG129 | 292730 | 293089 | 1.33 | 1.08E-01 | transcription_start_site | - | 291773 | 291773 | -1136 | 6204 | AN10945 |
| 2113 | CONTIG129 | 292730 | 293089 | 1.33 | 1.08E-01 | transcription_start_site | - | 290998 | 290998 | -1911 | 6205 | AN10945 |
| 2383 | CONTIG129 | 298810 | 299089 | 1.24 | 1.44E-01 | transcription_start_site | - | 298955 | 298955 | 5     | 6207 | AN10946 |
| 2383 | CONTIG129 | 298810 | 299089 | 1.24 | 1.44E-01 | transcription_start_site | - | 299147 | 299147 | 197   | 6206 | AN10946 |
| 2383 | CONTIG129 | 298810 | 299089 | 1.24 | 1.44E-01 | transcription_start_site | - | 298708 | 298708 | -241  | 6208 | AN10946 |
| 2383 | CONTIG129 | 298810 | 299089 | 1.24 | 1.44E-01 | transcription_start_site | - | 298497 | 298497 | -452  | 6209 | AN10946 |
| 1297 | CONTIG129 | 346364 | 346722 | 1.7  | 3.08E-02 | transcription_start_site | - | 344687 | 344687 | -1856 | 6210 | AN10947 |
| 2222 | CONTIG129 | 347039 | 347683 | 1.29 | 1.07E-01 | transcription_start_site | - | 344687 | 344687 | -2674 | 6210 | AN10947 |
| 1090 | CONTIG129 | 531526 | 531800 | 1.84 | 1.84E-02 | transcription_start_site | + | 532341 | 532341 | -678  | 6217 | AN10949 |
| 1090 | CONTIG129 | 531526 | 531800 | 1.84 | 1.84E-02 | transcription_start_site | + | 533021 | 533021 | -1358 | 6218 | AN10949 |
| 1090 | CONTIG129 | 531526 | 531800 | 1.84 | 1.84E-02 | transcription_start_site | + | 533512 | 533512 | -1849 | 6219 | AN10949 |
| 1090 | CONTIG129 | 531526 | 531800 | 1.84 | 1.84E-02 | transcription_start_site | + | 534627 | 534627 | -2964 | 6220 | AN10949 |
| 1090 | CONTIG129 | 531526 | 531800 | 1.84 | 1.84E-02 | transcription_start_site | + | 536166 | 536166 | -4503 | 6221 | AN10949 |
| 1090 | CONTIG129 | 531526 | 531800 | 1.84 | 1.84E-02 | transcription_start_site | + | 536672 | 536672 | -5009 | 6222 | AN10949 |
| 23   | CONTIG16  | 163732 | 164451 | 3.58 | 0.00E+00 | transcription_start_site | - | 158931 | 158931 | -5160 | 6223 | AN1095  |
| 85   | CONTIG16  | 162752 | 163034 | 3.28 | 0.00E+00 | transcription_start_site | - | 158931 | 158931 | -3962 | 6223 | AN1095  |
| 85   | CONTIG16  | 162752 | 163034 | 3.28 | 0.00E+00 | transcription_start_site | - | 158558 | 158558 | -4335 | 6224 | AN1095  |
| 1237 | CONTIG16  | 158268 | 158752 | 1.74 | 4.36E-02 | transcription_start_site | - | 158558 | 158558 | 48    | 6224 | AN1095  |
| 1237 | CONTIG16  | 158268 | 158752 | 1.74 | 4.36E-02 | transcription_start_site | - | 158931 | 158931 | 421   | 6223 | AN1095  |
| 1956 | CONTIG16  | 160128 | 160477 | 1.39 | 1.25E-01 | transcription_start_site | - | 158931 | 158931 | -1371 | 6223 | AN1095  |
| 1956 | CONTIG16  | 160128 | 160477 | 1.39 | 1.25E-01 | transcription_start_site | - | 158558 | 158558 | -1744 | 6224 | AN1095  |
| 1957 | CONTIG16  | 161328 | 161843 | 1.39 | 1.25E-01 | transcription_start_site | - | 158931 | 158931 | -2654 | 6223 | AN1095  |
| 1957 | CONTIG16  | 161328 | 161843 | 1.39 | 1.25E-01 | transcription_start_site | - | 158558 | 158558 | -3027 | 6224 | AN1095  |
| 113  | CONTIG129 | 567609 | 567968 | 3.17 | 0.00E+00 | transcription_start_site | + | 568233 | 568233 | -444  | 6225 | AN10950 |
| 113  | CONTIG129 | 567609 | 567968 | 3.17 | 0.00E+00 | transcription_start_site | + | 568597 | 568597 | -808  | 6226 | AN10950 |
| 1880 | CONTIG129 | 569034 | 569608 | 1.42 | 8.01E-02 | transcription_start_site | + | 568597 | 568597 | 724   | 6226 | AN10950 |
| 1880 | CONTIG129 | 569034 | 569608 | 1.42 | 8.01E-02 | transcription_start_site | + | 568233 | 568233 | 1088  | 6225 | AN10950 |
| 822  | CONTIG129 | 621677 | 622041 | 2.07 | 3.31E-03 | transcription_start_site | + | 622319 | 622319 | -460  | 6230 | AN10952 |
| 822  | CONTIG129 | 621677 | 622041 | 2.07 | 3.31E-03 | transcription_start_site | + | 623033 | 623033 | -1174 | 6231 | AN10952 |
| 822  | CONTIG129 | 621677 | 622041 | 2.07 | 3.31E-03 | transcription_start_site | + | 623386 | 623386 | -1527 | 6232 | AN10952 |
| 2113 | CONTIG129 | 292730 | 293089 | 1.33 | 1.08E-01 | transcription_start_site | - | 290249 | 290249 | -2660 | 6250 | AN10957 |
| 2113 | CONTIG129 | 292730 | 293089 | 1.33 | 1.08E-01 | transcription_start_site | - | 290132 | 290132 | -2777 | 6251 | AN10957 |
| 2113 | CONTIG129 | 292730 | 293089 | 1.33 | 1.08E-01 | transcription_start_site | - | 289407 | 289407 | -3502 | 6252 | AN10957 |
| 2113 | CONTIG129 | 292730 | 293089 | 1.33 | 1.08E-01 | transcription_start_site | - | 287808 | 287808 | -5101 | 6253 | AN10958 |
| 23   | CONTIG16  | 163732 | 164451 | 3.58 | 0.00E+00 | transcription_start_site | - | 161667 | 161667 | -2424 | 6261 | AN1096  |
| 23   | CONTIG16  | 163732 | 164451 | 3.58 | 0.00E+00 | transcription_start_site | - | 161141 | 161141 | -2950 | 6262 | AN1096  |

|      |           |        |        |      |          |                          |   |        |        |       |      |         |
|------|-----------|--------|--------|------|----------|--------------------------|---|--------|--------|-------|------|---------|
| 23   | CONTIG16  | 163732 | 164451 | 3.58 | 0.00E+00 | transcription_start_site | - | 160812 | 160812 | -3279 | 6263 | AN1096  |
| 85   | CONTIG16  | 162752 | 163034 | 3.28 | 0.00E+00 | transcription_start_site | - | 161667 | 161667 | -1226 | 6261 | AN1096  |
| 85   | CONTIG16  | 162752 | 163034 | 3.28 | 0.00E+00 | transcription_start_site | - | 161141 | 161141 | -1752 | 6262 | AN1096  |
| 85   | CONTIG16  | 162752 | 163034 | 3.28 | 0.00E+00 | transcription_start_site | - | 160812 | 160812 | -2081 | 6263 | AN1096  |
| 320  | CONTIG16  | 165752 | 166334 | 2.73 | 0.00E+00 | transcription_start_site | - | 161667 | 161667 | -4376 | 6261 | AN1096  |
| 320  | CONTIG16  | 165752 | 166334 | 2.73 | 0.00E+00 | transcription_start_site | - | 161141 | 161141 | -4902 | 6262 | AN1096  |
| 320  | CONTIG16  | 165752 | 166334 | 2.73 | 0.00E+00 | transcription_start_site | - | 160812 | 160812 | -5231 | 6263 | AN1096  |
| 1956 | CONTIG16  | 160128 | 160477 | 1.39 | 1.25E-01 | transcription_start_site | - | 160812 | 160812 | 509   | 6263 | AN1096  |
| 1956 | CONTIG16  | 160128 | 160477 | 1.39 | 1.25E-01 | transcription_start_site | - | 161141 | 161141 | 838   | 6262 | AN1096  |
| 1957 | CONTIG16  | 161328 | 161843 | 1.39 | 1.25E-01 | transcription_start_site | - | 161667 | 161667 | 81    | 6261 | AN1096  |
| 1957 | CONTIG16  | 161328 | 161843 | 1.39 | 1.25E-01 | transcription_start_site | - | 161141 | 161141 | -444  | 6262 | AN1096  |
| 1957 | CONTIG16  | 161328 | 161843 | 1.39 | 1.25E-01 | transcription_start_site | - | 160812 | 160812 | -773  | 6263 | AN1096  |
| 1297 | CONTIG129 | 346364 | 346722 | 1.7  | 3.08E-02 | transcription_start_site | - | 346421 | 346421 | -122  | 6264 | AN10960 |
| 2222 | CONTIG129 | 347039 | 347683 | 1.29 | 1.07E-01 | transcription_start_site | - | 346421 | 346421 | -940  | 6264 | AN10960 |
| 545  | CONTIG129 | 556053 | 556402 | 2.39 | 1.80E-03 | transcription_start_site | + | 560242 | 560242 | -4014 | 6275 | AN10964 |
| 1300 | CONTIG129 | 556888 | 557237 | 1.7  | 3.08E-02 | transcription_start_site | + | 560242 | 560242 | -3179 | 6275 | AN10964 |
| 822  | CONTIG129 | 621677 | 622041 | 2.07 | 3.31E-03 | transcription_start_site | + | 624676 | 624676 | -2817 | 6276 | AN10965 |
| 822  | CONTIG129 | 621677 | 622041 | 2.07 | 3.31E-03 | transcription_start_site | + | 624844 | 624844 | -2985 | 6277 | AN10965 |
| 822  | CONTIG129 | 621677 | 622041 | 2.07 | 3.31E-03 | transcription_start_site | + | 625037 | 625037 | -3178 | 6278 | AN10965 |
| 822  | CONTIG129 | 621677 | 622041 | 2.07 | 3.31E-03 | transcription_start_site | + | 625170 | 625170 | -3311 | 6279 | AN10965 |
| 822  | CONTIG129 | 621677 | 622041 | 2.07 | 3.31E-03 | transcription_start_site | + | 625352 | 625352 | -3493 | 6280 | AN10965 |
| 822  | CONTIG129 | 621677 | 622041 | 2.07 | 3.31E-03 | transcription_start_site | + | 625911 | 625911 | -4052 | 6281 | AN10966 |
| 822  | CONTIG129 | 621677 | 622041 | 2.07 | 3.31E-03 | transcription_start_site | + | 625989 | 625989 | -4130 | 6282 | AN10966 |
| 822  | CONTIG129 | 621677 | 622041 | 2.07 | 3.31E-03 | transcription_start_site | + | 626100 | 626100 | -4241 | 6283 | AN10966 |
| 822  | CONTIG129 | 621677 | 622041 | 2.07 | 3.31E-03 | transcription_start_site | + | 626324 | 626324 | -4465 | 6284 | AN10966 |
| 422  | CONTIG129 | 278940 | 279369 | 2.57 | 9.51E-04 | transcription_start_site | + | 279659 | 279659 | -504  | 6287 | AN10968 |
| 686  | CONTIG129 | 276917 | 277191 | 2.21 | 4.61E-03 | transcription_start_site | + | 279659 | 279659 | -2605 | 6287 | AN10968 |
| 747  | CONTIG129 | 278030 | 278539 | 2.16 | 5.20E-03 | transcription_start_site | + | 279659 | 279659 | -1374 | 6287 | AN10968 |
| 2112 | CONTIG129 | 275101 | 275600 | 1.33 | 1.08E-01 | transcription_start_site | + | 279659 | 279659 | -4308 | 6287 | AN10968 |
| 2639 | CONTIG129 | 275641 | 276800 | 1.15 | 1.79E-01 | transcription_start_site | + | 279659 | 279659 | -3438 | 6287 | AN10968 |
| 1091 | CONTIG129 | 573604 | 573893 | 1.84 | 1.84E-02 | transcription_start_site | + | 574514 | 574514 | -765  | 6288 | AN10969 |
| 1287 | CONTIG129 | 571214 | 572153 | 1.7  | 1.23E-02 | transcription_start_site | + | 574514 | 574514 | -2830 | 6288 | AN10969 |
| 1880 | CONTIG129 | 569034 | 569608 | 1.42 | 8.01E-02 | transcription_start_site | + | 574514 | 574514 | -5193 | 6288 | AN10969 |
| 1835 | CONTIG16  | 173421 | 174072 | 1.44 | 9.26E-02 | transcription_start_site | - | 173297 | 173297 | -449  | 6289 | AN1097  |
| 1090 | CONTIG129 | 531526 | 531800 | 1.84 | 1.84E-02 | transcription_start_site | + | 531082 | 531082 | 581   | 6301 | AN10972 |
| 1090 | CONTIG129 | 531526 | 531800 | 1.84 | 1.84E-02 | transcription_start_site | + | 530795 | 530795 | 868   | 6300 | AN10972 |
| 1879 | CONTIG129 | 525846 | 526120 | 1.42 | 8.01E-02 | transcription_start_site | + | 529389 | 529389 | -3406 | 6297 | AN10972 |
| 1879 | CONTIG129 | 525846 | 526120 | 1.42 | 8.01E-02 | transcription_start_site | + | 530057 | 530057 | -4074 | 6298 | AN10972 |
| 1879 | CONTIG129 | 525846 | 526120 | 1.42 | 8.01E-02 | transcription_start_site | + | 530460 | 530460 | -4477 | 6299 | AN10972 |
| 1879 | CONTIG129 | 525846 | 526120 | 1.42 | 8.01E-02 | transcription_start_site | + | 530795 | 530795 | -4812 | 6300 | AN10972 |
| 1879 | CONTIG129 | 525846 | 526120 | 1.42 | 8.01E-02 | transcription_start_site | + | 531082 | 531082 | -5099 | 6301 | AN10972 |
| 1205 | CONTIG130 | 37438  | 37783  | 1.76 | 3.08E-02 | transcription_start_site | + | 38136  | 38136  | -525  | 6306 | AN10974 |
| 1205 | CONTIG130 | 37438  | 37783  | 1.76 | 3.08E-02 | transcription_start_site | + | 38485  | 38485  | -874  | 6307 | AN10974 |
| 2549 | CONTIG130 | 34353  | 35602  | 1.19 | 1.93E-01 | transcription_start_site | + | 38136  | 38136  | -3158 | 6306 | AN10974 |
| 2549 | CONTIG130 | 34353  | 35602  | 1.19 | 1.93E-01 | transcription_start_site | + | 38485  | 38485  | -3507 | 6307 | AN10974 |
| 2265 | CONTIG130 | 42312  | 42892  | 1.28 | 1.28E-01 | transcription_start_site | + | 46325  | 46325  | -3723 | 6308 | AN10975 |
| 2265 | CONTIG130 | 42312  | 42892  | 1.28 | 1.28E-01 | transcription_start_site | + | 46537  | 46537  | -3935 | 6309 | AN10975 |
| 2265 | CONTIG130 | 42312  | 42892  | 1.28 | 1.28E-01 | transcription_start_site | + | 46897  | 46897  | -4295 | 6310 | AN10975 |
| 279  | CONTIG130 | 125035 | 125319 | 2.8  | 6.10E-04 | transcription_start_site | - | 124439 | 124439 | -738  | 6315 | AN10977 |
| 863  | CONTIG130 | 153226 | 153505 | 2.04 | 1.11E-02 | transcription_start_site | - | 149936 | 149936 | -3429 | 6316 | AN10978 |
| 863  | CONTIG130 | 153226 | 153505 | 2.04 | 1.11E-02 | transcription_start_site | - | 149814 | 149814 | -3551 | 6317 | AN10978 |
| 863  | CONTIG130 | 153226 | 153505 | 2.04 | 1.11E-02 | transcription_start_site | - | 148646 | 148646 | -4719 | 6318 | AN10978 |
| 2550 | CONTIG130 | 149853 | 150202 | 1.19 | 1.93E-01 | transcription_start_site | - | 149936 | 149936 | -91   | 6316 | AN10978 |
| 2550 | CONTIG130 | 149853 | 150202 | 1.19 | 1.93E-01 | transcription_start_site | - | 149814 | 149814 | -213  | 6317 | AN10978 |
| 2550 | CONTIG130 | 149853 | 150202 | 1.19 | 1.93E-01 | transcription_start_site | - | 148646 | 148646 | -1381 | 6318 | AN10978 |
| 1835 | CONTIG16  | 173421 | 174072 | 1.44 | 9.26E-02 | transcription_start_site | + | 173767 | 173767 | -20   | 6323 | AN1098  |
| 1835 | CONTIG16  | 173421 | 174072 | 1.44 | 9.26E-02 | transcription_start_site | + | 173609 | 173609 | 137   | 6322 | AN1098  |

|      |           |        |        |      |          |                          |   |        |        |       |      |         |
|------|-----------|--------|--------|------|----------|--------------------------|---|--------|--------|-------|------|---------|
| 2237 | CONTIG16  | 169355 | 170027 | 1.29 | 1.59E-01 | transcription_start_site | + | 173609 | 173609 | -3918 | 6322 | AN1098  |
| 2237 | CONTIG16  | 169355 | 170027 | 1.29 | 1.59E-01 | transcription_start_site | + | 173767 | 173767 | -4076 | 6323 | AN1098  |
| 195  | CONTIG130 | 191257 | 191526 | 2.95 | 2.67E-04 | transcription_start_site | - | 190738 | 190738 | -653  | 6332 | AN10982 |
| 195  | CONTIG130 | 191257 | 191526 | 2.95 | 2.67E-04 | transcription_start_site | - | 190431 | 190431 | -960  | 6333 | AN10982 |
| 195  | CONTIG130 | 191257 | 191526 | 2.95 | 2.67E-04 | transcription_start_site | - | 190239 | 190239 | -1152 | 6334 | AN10982 |
| 195  | CONTIG130 | 191257 | 191526 | 2.95 | 2.67E-04 | transcription_start_site | - | 190100 | 190100 | -1291 | 6335 | AN10982 |
| 195  | CONTIG130 | 191257 | 191526 | 2.95 | 2.67E-04 | transcription_start_site | - | 188135 | 188135 | -3256 | 6336 | AN10982 |
| 195  | CONTIG130 | 191257 | 191526 | 2.95 | 2.67E-04 | transcription_start_site | - | 188060 | 188060 | -3331 | 6337 | AN10982 |
| 1984 | CONTIG130 | 259969 | 260303 | 1.38 | 1.08E-01 | transcription_start_site | + | 260417 | 260417 | -281  | 6338 | AN10983 |
| 2110 | CONTIG130 | 47927  | 48576  | 1.33 | 1.07E-01 | transcription_start_site | + | 47958  | 47958  | 293   | 6351 | AN10987 |
| 279  | CONTIG130 | 125035 | 125319 | 2.8  | 6.10E-04 | transcription_start_site | - | 123623 | 123623 | -1554 | 6352 | AN10988 |
| 279  | CONTIG130 | 125035 | 125319 | 2.8  | 6.10E-04 | transcription_start_site | - | 122447 | 122447 | -2730 | 6353 | AN10988 |
| 1078 | CONTIG130 | 122420 | 123219 | 1.85 | 2.12E-02 | transcription_start_site | - | 122447 | 122447 | -372  | 6353 | AN10988 |
| 1078 | CONTIG130 | 122420 | 123219 | 1.85 | 2.12E-02 | transcription_start_site | - | 123623 | 123623 | 803   | 6352 | AN10988 |
| 2550 | CONTIG130 | 149853 | 150202 | 1.19 | 1.93E-01 | transcription_start_site | - | 148107 | 148107 | -1920 | 6354 | AN10989 |
| 415  | CONTIG16  | 179121 | 179455 | 2.58 | 0.00E+00 | transcription_start_site | + | 178571 | 178571 | 717   | 6360 | AN1099  |
| 1835 | CONTIG16  | 173421 | 174072 | 1.44 | 9.26E-02 | transcription_start_site | + | 177199 | 177199 | -3452 | 6355 | AN1099  |
| 1835 | CONTIG16  | 173421 | 174072 | 1.44 | 9.26E-02 | transcription_start_site | + | 177293 | 177293 | -3546 | 6356 | AN1099  |
| 1835 | CONTIG16  | 173421 | 174072 | 1.44 | 9.26E-02 | transcription_start_site | + | 177695 | 177695 | -3948 | 6357 | AN1099  |
| 1835 | CONTIG16  | 173421 | 174072 | 1.44 | 9.26E-02 | transcription_start_site | + | 177894 | 177894 | -4147 | 6358 | AN1099  |
| 1835 | CONTIG16  | 173421 | 174072 | 1.44 | 9.26E-02 | transcription_start_site | + | 178013 | 178013 | -4266 | 6359 | AN1099  |
| 1835 | CONTIG16  | 173421 | 174072 | 1.44 | 9.26E-02 | transcription_start_site | + | 178571 | 178571 | -4824 | 6360 | AN1099  |
| 1012 | CONTIG130 | 176859 | 177214 | 1.9  | 1.84E-02 | transcription_start_site | + | 175926 | 175926 | 1110  | 6361 | AN10990 |
| 1984 | CONTIG130 | 259969 | 260303 | 1.38 | 1.08E-01 | transcription_start_site | + | 259020 | 259020 | 1116  | 6362 | AN10991 |
| 195  | CONTIG130 | 191257 | 191526 | 2.95 | 2.67E-04 | transcription_start_site | - | 186832 | 186832 | -4559 | 6365 | AN10993 |
| 195  | CONTIG130 | 191257 | 191526 | 2.95 | 2.67E-04 | transcription_start_site | - | 186680 | 186680 | -4711 | 6366 | AN10993 |
| 2550 | CONTIG130 | 149853 | 150202 | 1.19 | 1.93E-01 | transcription_start_site | + | 150195 | 150195 | -167  | 6368 | AN10994 |
| 2550 | CONTIG130 | 149853 | 150202 | 1.19 | 1.93E-01 | transcription_start_site | + | 150419 | 150419 | -391  | 6369 | AN10994 |
| 625  | CONTIG130 | 205890 | 206244 | 2.28 | 4.61E-03 | transcription_start_site | - | 205278 | 205278 | -789  | 6370 | AN10995 |
| 625  | CONTIG130 | 205890 | 206244 | 2.28 | 4.61E-03 | transcription_start_site | - | 205163 | 205163 | -904  | 6371 | AN10995 |
| 1205 | CONTIG130 | 37438  | 37783  | 1.76 | 3.08E-02 | transcription_start_site | + | 39204  | 39204  | -1593 | 6372 | AN10996 |
| 1205 | CONTIG130 | 37438  | 37783  | 1.76 | 3.08E-02 | transcription_start_site | + | 39485  | 39485  | -1874 | 6373 | AN10996 |
| 1205 | CONTIG130 | 37438  | 37783  | 1.76 | 3.08E-02 | transcription_start_site | + | 40708  | 40708  | -3097 | 6374 | AN10996 |
| 1205 | CONTIG130 | 37438  | 37783  | 1.76 | 3.08E-02 | transcription_start_site | + | 40841  | 40841  | -3230 | 6375 | AN10996 |
| 2549 | CONTIG130 | 34353  | 35602  | 1.19 | 1.93E-01 | transcription_start_site | + | 39204  | 39204  | -4226 | 6372 | AN10996 |
| 2549 | CONTIG130 | 34353  | 35602  | 1.19 | 1.93E-01 | transcription_start_site | + | 39485  | 39485  | -4507 | 6373 | AN10996 |
| 2080 | CONTIG132 | 43282  | 44091  | 1.34 | 8.01E-02 | transcription_start_site | - | 44196  | 44196  | 509   | 6421 | AN11008 |
| 2080 | CONTIG132 | 43282  | 44091  | 1.34 | 8.01E-02 | transcription_start_site | - | 42956  | 42956  | -730  | 6422 | AN11008 |
| 1766 | CONTIG132 | 142133 | 142638 | 1.47 | 3.33E-02 | transcription_start_site | - | 140735 | 140735 | -1650 | 6429 | AN11010 |
| 1766 | CONTIG132 | 142133 | 142638 | 1.47 | 3.33E-02 | transcription_start_site | - | 139879 | 139879 | -2506 | 6430 | AN11010 |
| 1766 | CONTIG132 | 142133 | 142638 | 1.47 | 3.33E-02 | transcription_start_site | - | 139482 | 139482 | -2903 | 6431 | AN11010 |
| 2686 | CONTIG132 | 142738 | 143307 | 1.13 | 1.66E-01 | transcription_start_site | - | 140735 | 140735 | -2287 | 6429 | AN11010 |
| 2686 | CONTIG132 | 142738 | 143307 | 1.13 | 1.66E-01 | transcription_start_site | - | 139879 | 139879 | -3143 | 6430 | AN11010 |
| 2686 | CONTIG132 | 142738 | 143307 | 1.13 | 1.66E-01 | transcription_start_site | - | 139482 | 139482 | -3540 | 6431 | AN11010 |
| 1669 | CONTIG132 | 155028 | 155387 | 1.51 | 2.64E-02 | transcription_start_site | - | 155708 | 155708 | 500   | 6433 | AN11011 |
| 1669 | CONTIG132 | 155028 | 155387 | 1.51 | 2.64E-02 | transcription_start_site | - | 155834 | 155834 | 626   | 6432 | AN11011 |
| 1669 | CONTIG132 | 155028 | 155387 | 1.51 | 2.64E-02 | transcription_start_site | - | 154413 | 154413 | -794  | 6434 | AN11011 |
| 1669 | CONTIG132 | 155028 | 155387 | 1.51 | 2.64E-02 | transcription_start_site | - | 154173 | 154173 | -1034 | 6435 | AN11011 |
| 2074 | CONTIG132 | 153618 | 154777 | 1.34 | 4.45E-02 | transcription_start_site | - | 154173 | 154173 | -24   | 6435 | AN11011 |
| 2074 | CONTIG132 | 153618 | 154777 | 1.34 | 4.45E-02 | transcription_start_site | - | 154413 | 154413 | 215   | 6434 | AN11011 |
| 2074 | CONTIG132 | 153618 | 154777 | 1.34 | 4.45E-02 | transcription_start_site | - | 155708 | 155708 | 1510  | 6433 | AN11011 |
| 1669 | CONTIG132 | 155028 | 155387 | 1.51 | 2.64E-02 | transcription_start_site | - | 153249 | 153249 | -1958 | 6443 | AN11016 |
| 1669 | CONTIG132 | 155028 | 155387 | 1.51 | 2.64E-02 | transcription_start_site | - | 152227 | 152227 | -2980 | 6444 | AN11016 |
| 2074 | CONTIG132 | 153618 | 154777 | 1.34 | 4.45E-02 | transcription_start_site | - | 153249 | 153249 | -948  | 6443 | AN11016 |
| 2074 | CONTIG132 | 153618 | 154777 | 1.34 | 4.45E-02 | transcription_start_site | - | 152227 | 152227 | -1970 | 6444 | AN11016 |
| 869  | CONTIG132 | 4651   | 5020   | 2.03 | 5.20E-03 | transcription_start_site | - | 4411   | 4411   | -424  | 6452 | AN11019 |
| 2685 | CONTIG132 | 5946   | 6370   | 1.13 | 1.66E-01 | transcription_start_site | - | 4411   | 4411   | -1747 | 6452 | AN11019 |

|                |        |        |      |          |                          |   |        |        |       |              |
|----------------|--------|--------|------|----------|--------------------------|---|--------|--------|-------|--------------|
| 711 CONTIG16   | 193816 | 194160 | 2.19 | 8.81E-03 | transcription_start_site | - | 193511 | 193511 | -477  | 6453 AN1102  |
| 2687 CONTIG132 | 216301 | 216585 | 1.13 | 1.66E-01 | transcription_start_site | + | 219987 | 219987 | -3544 | 6455 AN11021 |
| 2687 CONTIG132 | 216301 | 216585 | 1.13 | 1.66E-01 | transcription_start_site | + | 220059 | 220059 | -3616 | 6456 AN11021 |
| 2687 CONTIG132 | 216301 | 216585 | 1.13 | 1.66E-01 | transcription_start_site | + | 220336 | 220336 | -3893 | 6457 AN11021 |
| 2080 CONTIG132 | 43282  | 44091  | 1.34 | 8.01E-02 | transcription_start_site | - | 44557  | 44557  | 870   | 6459 AN11022 |
| 3049 CONTIG133 | 12906  | 13268  | 0.76 | 8.01E-02 | transcription_start_site | + | 12269  | 12269  | 818   | 6463 AN11024 |
| 2577 CONTIG135 | 174451 | 174725 | 1.17 | 6.84E-02 | transcription_start_site | + | 178417 | 178417 | -3829 | 6474 AN11029 |
| 2577 CONTIG135 | 174451 | 174725 | 1.17 | 6.84E-02 | transcription_start_site | + | 178687 | 178687 | -4099 | 6475 AN11029 |
| 2577 CONTIG135 | 174451 | 174725 | 1.17 | 6.84E-02 | transcription_start_site | + | 179054 | 179054 | -4466 | 6476 AN11029 |
| 2577 CONTIG135 | 174451 | 174725 | 1.17 | 6.84E-02 | transcription_start_site | + | 179456 | 179456 | -4868 | 6477 AN11029 |
| 711 CONTIG16   | 193816 | 194160 | 2.19 | 8.81E-03 | transcription_start_site | + | 196880 | 196880 | -2892 | 6479 AN1103  |
| 711 CONTIG16   | 193816 | 194160 | 2.19 | 8.81E-03 | transcription_start_site | + | 197157 | 197157 | -3169 | 6480 AN1103  |
| 326 CONTIG139  | 59480  | 59834  | 2.72 | 0.00E+00 | transcription_start_site | + | 59677  | 59677  | -20   | 6490 AN11032 |
| 326 CONTIG139  | 59480  | 59834  | 2.72 | 0.00E+00 | transcription_start_site | + | 59794  | 59794  | -137  | 6491 AN11032 |
| 326 CONTIG139  | 59480  | 59834  | 2.72 | 0.00E+00 | transcription_start_site | + | 59923  | 59923  | -266  | 6492 AN11032 |
| 326 CONTIG139  | 59480  | 59834  | 2.72 | 0.00E+00 | transcription_start_site | + | 60194  | 60194  | -537  | 6493 AN11032 |
| 326 CONTIG139  | 59480  | 59834  | 2.72 | 0.00E+00 | transcription_start_site | + | 60792  | 60792  | -1135 | 6494 AN11032 |
| 326 CONTIG139  | 59480  | 59834  | 2.72 | 0.00E+00 | transcription_start_site | + | 61478  | 61478  | -1821 | 6495 AN11032 |
| 429 CONTIG139  | 61370  | 61639  | 2.55 | 2.39E-04 | transcription_start_site | + | 61478  | 61478  | 26    | 6495 AN11032 |
| 429 CONTIG139  | 61370  | 61639  | 2.55 | 2.39E-04 | transcription_start_site | + | 60792  | 60792  | 712   | 6494 AN11032 |
| 2178 CONTIG139 | 61820  | 62529  | 1.3  | 6.16E-02 | transcription_start_site | + | 61478  | 61478  | 696   | 6495 AN11032 |
| 2681 CONTIG139 | 196592 | 197091 | 1.13 | 1.44E-01 | transcription_start_site | + | 198204 | 198204 | -1362 | 6499 AN11034 |
| 2681 CONTIG139 | 196592 | 197091 | 1.13 | 1.44E-01 | transcription_start_site | + | 198304 | 198304 | -1462 | 6500 AN11034 |
| 2681 CONTIG139 | 196592 | 197091 | 1.13 | 1.44E-01 | transcription_start_site | + | 198641 | 198641 | -1799 | 6501 AN11034 |
| 2681 CONTIG139 | 196592 | 197091 | 1.13 | 1.44E-01 | transcription_start_site | + | 198939 | 198939 | -2097 | 6502 AN11034 |
| 2681 CONTIG139 | 196592 | 197091 | 1.13 | 1.44E-01 | transcription_start_site | + | 199042 | 199042 | -2200 | 6503 AN11034 |
| 2681 CONTIG139 | 196592 | 197091 | 1.13 | 1.44E-01 | transcription_start_site | + | 199203 | 199203 | -2361 | 6504 AN11034 |
| 1265 CONTIG139 | 108156 | 110155 | 1.71 | 3.83E-03 | transcription_start_site | - | 108146 | 108146 | -1009 | 6523 AN11039 |
| 1265 CONTIG139 | 108156 | 110155 | 1.71 | 3.83E-03 | transcription_start_site | - | 107784 | 107784 | -1371 | 6524 AN11039 |
| 1265 CONTIG139 | 108156 | 110155 | 1.71 | 3.83E-03 | transcription_start_site | - | 107467 | 107467 | -1688 | 6525 AN11039 |
| 1270 CONTIG139 | 115131 | 115705 | 1.71 | 1.57E-02 | transcription_start_site | + | 116964 | 116964 | -1546 | 6529 AN11041 |
| 1270 CONTIG139 | 115131 | 115705 | 1.71 | 1.57E-02 | transcription_start_site | + | 117021 | 117021 | -1603 | 6530 AN11041 |
| 1270 CONTIG139 | 115131 | 115705 | 1.71 | 1.57E-02 | transcription_start_site | + | 117132 | 117132 | -1714 | 6531 AN11041 |
| 1270 CONTIG139 | 115131 | 115705 | 1.71 | 1.57E-02 | transcription_start_site | + | 117274 | 117274 | -1856 | 6532 AN11041 |
| 1270 CONTIG139 | 115131 | 115705 | 1.71 | 1.57E-02 | transcription_start_site | + | 117389 | 117389 | -1971 | 6533 AN11041 |
| 1270 CONTIG139 | 115131 | 115705 | 1.71 | 1.57E-02 | transcription_start_site | + | 119464 | 119464 | -4046 | 6534 AN11042 |
| 2681 CONTIG139 | 196592 | 197091 | 1.13 | 1.44E-01 | transcription_start_site | + | 196845 | 196845 | -3    | 6538 AN11046 |
| 2681 CONTIG139 | 196592 | 197091 | 1.13 | 1.44E-01 | transcription_start_site | + | 197100 | 197100 | -258  | 6539 AN11046 |
| 2681 CONTIG139 | 196592 | 197091 | 1.13 | 1.44E-01 | transcription_start_site | + | 197381 | 197381 | -539  | 6540 AN11046 |
| 2681 CONTIG139 | 196592 | 197091 | 1.13 | 1.44E-01 | transcription_start_site | + | 197582 | 197582 | -740  | 6541 AN11046 |
| 2681 CONTIG139 | 196592 | 197091 | 1.13 | 1.44E-01 | transcription_start_site | + | 200714 | 200714 | -3872 | 6542 AN11047 |
| 2681 CONTIG139 | 196592 | 197091 | 1.13 | 1.44E-01 | transcription_start_site | + | 201190 | 201190 | -4348 | 6543 AN11047 |
| 2430 CONTIG141 | 184427 | 184851 | 1.22 | 3.99E-02 | transcription_start_site | - | 179802 | 179802 | -4837 | 6561 AN11052 |
| 2434 CONTIG144 | 40069  | 40328  | 1.22 | 9.24E-02 | transcription_start_site | - | 41277  | 41277  | 1078  | 6571 AN11055 |
| 228 CONTIG144  | 49510  | 49961  | 2.88 | 0.00E+00 | transcription_start_site | - | 50541  | 50541  | 805   | 6573 AN11056 |
| 786 CONTIG144  | 50555  | 50909  | 2.11 | 1.80E-03 | transcription_start_site | - | 50541  | 50541  | -191  | 6573 AN11056 |
| 786 CONTIG144  | 50555  | 50909  | 2.11 | 1.80E-03 | transcription_start_site | - | 51127  | 51127  | 395   | 6572 AN11056 |
| 2322 CONTIG144 | 14026  | 14465  | 1.26 | 8.01E-02 | transcription_start_site | + | 14019  | 14019  | 226   | 6580 AN11058 |
| 2322 CONTIG144 | 14026  | 14465  | 1.26 | 8.01E-02 | transcription_start_site | + | 13609  | 13609  | 636   | 6579 AN11058 |
| 2322 CONTIG144 | 14026  | 14465  | 1.26 | 8.01E-02 | transcription_start_site | + | 13482  | 13482  | 763   | 6578 AN11058 |
| 2322 CONTIG144 | 14026  | 14465  | 1.26 | 8.01E-02 | transcription_start_site | + | 15540  | 15540  | -1294 | 6581 AN11059 |
| 2322 CONTIG144 | 14026  | 14465  | 1.26 | 8.01E-02 | transcription_start_site | + | 15807  | 15807  | -1561 | 6582 AN11059 |
| 2322 CONTIG144 | 14026  | 14465  | 1.26 | 8.01E-02 | transcription_start_site | + | 16038  | 16038  | -1792 | 6583 AN11059 |
| 2434 CONTIG144 | 40069  | 40328  | 1.22 | 9.24E-02 | transcription_start_site | - | 40270  | 40270  | 71    | 6588 AN11060 |
| 2434 CONTIG144 | 40069  | 40328  | 1.22 | 9.24E-02 | transcription_start_site | - | 40076  | 40076  | -122  | 6589 AN11060 |
| 228 CONTIG144  | 49510  | 49961  | 2.88 | 0.00E+00 | transcription_start_site | - | 48824  | 48824  | -911  | 6590 AN11061 |
| 228 CONTIG144  | 49510  | 49961  | 2.88 | 0.00E+00 | transcription_start_site | - | 48658  | 48658  | -1077 | 6591 AN11061 |



|      |           |        |        |      |          |                          |   |        |        |       |      |         |
|------|-----------|--------|--------|------|----------|--------------------------|---|--------|--------|-------|------|---------|
| 228  | CONTIG144 | 49510  | 49961  | 2.88 | 0.00E+00 | transcription_start_site | - | 47981  | 47981  | -1754 | 6592 | AN11061 |
| 786  | CONTIG144 | 50555  | 50909  | 2.11 | 1.80E-03 | transcription_start_site | - | 48824  | 48824  | -1908 | 6590 | AN11061 |
| 786  | CONTIG144 | 50555  | 50909  | 2.11 | 1.80E-03 | transcription_start_site | - | 48658  | 48658  | -2074 | 6591 | AN11061 |
| 786  | CONTIG144 | 50555  | 50909  | 2.11 | 1.80E-03 | transcription_start_site | - | 47981  | 47981  | -2751 | 6592 | AN11061 |
| 62   | CONTIG145 | 40201  | 40552  | 3.37 | 0.00E+00 | transcription_start_site | + | 41667  | 41667  | -1290 | 6597 | AN11064 |
| 62   | CONTIG145 | 40201  | 40552  | 3.37 | 0.00E+00 | transcription_start_site | + | 41852  | 41852  | -1475 | 6598 | AN11064 |
| 62   | CONTIG145 | 40201  | 40552  | 3.37 | 0.00E+00 | transcription_start_site | + | 42547  | 42547  | -2170 | 6599 | AN11064 |
| 62   | CONTIG145 | 40201  | 40552  | 3.37 | 0.00E+00 | transcription_start_site | + | 42784  | 42784  | -2407 | 6600 | AN11064 |
| 1314 | CONTIG145 | 38496  | 38900  | 1.68 | 3.08E-02 | transcription_start_site | + | 41667  | 41667  | -2969 | 6597 | AN11064 |
| 1314 | CONTIG145 | 38496  | 38900  | 1.68 | 3.08E-02 | transcription_start_site | + | 41852  | 41852  | -3154 | 6598 | AN11064 |
| 1314 | CONTIG145 | 38496  | 38900  | 1.68 | 3.08E-02 | transcription_start_site | + | 42547  | 42547  | -3849 | 6599 | AN11064 |
| 1314 | CONTIG145 | 38496  | 38900  | 1.68 | 3.08E-02 | transcription_start_site | + | 42784  | 42784  | -4086 | 6600 | AN11064 |
| 2414 | CONTIG145 | 71494  | 71843  | 1.23 | 1.44E-01 | transcription_start_site | + | 72567  | 72567  | -898  | 6607 | AN11067 |
| 2668 | CONTIG145 | 22517  | 23001  | 1.14 | 1.79E-01 | transcription_start_site | + | 21898  | 21898  | 861   | 6612 | AN11069 |
| 2668 | CONTIG145 | 22517  | 23001  | 1.14 | 1.79E-01 | transcription_start_site | + | 21785  | 21785  | 974   | 6611 | AN11069 |
| 62   | CONTIG145 | 40201  | 40552  | 3.37 | 0.00E+00 | transcription_start_site | + | 43412  | 43412  | -3035 | 6618 | AN11070 |
| 1314 | CONTIG145 | 38496  | 38900  | 1.68 | 3.08E-02 | transcription_start_site | + | 43412  | 43412  | -4714 | 6618 | AN11070 |
| 2774 | CONTIG153 | 331728 | 332012 | 1.08 | 9.24E-02 | transcription_start_site | - | 332584 | 332584 | 714   | 6649 | AN11080 |
| 2774 | CONTIG153 | 331728 | 332012 | 1.08 | 9.24E-02 | transcription_start_site | - | 331724 | 331724 | -146  | 6652 | AN11082 |
| 2774 | CONTIG153 | 331728 | 332012 | 1.08 | 9.24E-02 | transcription_start_site | - | 332069 | 332069 | 199   | 6651 | AN11082 |
| 1818 | CONTIG153 | 197631 | 197975 | 1.44 | 1.84E-02 | transcription_start_site | + | 201065 | 201065 | -3262 | 6653 | AN11083 |
| 1818 | CONTIG153 | 197631 | 197975 | 1.44 | 1.84E-02 | transcription_start_site | + | 201150 | 201150 | -3347 | 6654 | AN11083 |
| 2631 | CONTIG153 | 201246 | 201875 | 1.15 | 6.84E-02 | transcription_start_site | + | 201150 | 201150 | 410   | 6654 | AN11083 |
| 2631 | CONTIG153 | 201246 | 201875 | 1.15 | 6.84E-02 | transcription_start_site | + | 201065 | 201065 | 495   | 6653 | AN11083 |
| 2883 | CONTIG153 | 178276 | 178717 | 1.01 | 1.25E-01 | transcription_start_site | - | 174058 | 174058 | -4438 | 6655 | AN11084 |
| 2829 | CONTIG157 | 65045  | 65454  | 1.05 | 1.50E-01 | transcription_start_site | + | 70079  | 70079  | -4829 | 6662 | AN11087 |
| 2095 | CONTIG158 | 53412  | 54507  | 1.34 | 1.64E-01 | transcription_start_site | - | 53409  | 53409  | -550  | 6674 | AN11090 |
| 2095 | CONTIG158 | 53412  | 54507  | 1.34 | 1.64E-01 | transcription_start_site | - | 52987  | 52987  | -972  | 6675 | AN11090 |
| 2095 | CONTIG158 | 53412  | 54507  | 1.34 | 1.64E-01 | transcription_start_site | - | 52495  | 52495  | -1464 | 6676 | AN11090 |
| 2095 | CONTIG158 | 53412  | 54507  | 1.34 | 1.64E-01 | transcription_start_site | - | 52339  | 52339  | -1620 | 6677 | AN11090 |
| 783  | CONTIG158 | 102394 | 102669 | 2.12 | 2.62E-02 | transcription_start_site | - | 102293 | 102293 | -238  | 6682 | AN11093 |
| 783  | CONTIG158 | 102394 | 102669 | 2.12 | 2.62E-02 | transcription_start_site | - | 101273 | 101273 | -1258 | 6683 | AN11093 |
| 783  | CONTIG158 | 102394 | 102669 | 2.12 | 2.62E-02 | transcription_start_site | - | 100860 | 100860 | -1671 | 6684 | AN11093 |
| 2095 | CONTIG158 | 53412  | 54507  | 1.34 | 1.64E-01 | transcription_start_site | - | 51814  | 51814  | -2145 | 6686 | AN11095 |
| 2095 | CONTIG158 | 53412  | 54507  | 1.34 | 1.64E-01 | transcription_start_site | - | 51436  | 51436  | -2523 | 6687 | AN11095 |
| 2095 | CONTIG158 | 53412  | 54507  | 1.34 | 1.64E-01 | transcription_start_site | - | 50719  | 50719  | -3240 | 6688 | AN11095 |
| 783  | CONTIG158 | 102394 | 102669 | 2.12 | 2.62E-02 | transcription_start_site | - | 102474 | 102474 | -57   | 6714 | AN11100 |
| 783  | CONTIG158 | 102394 | 102669 | 2.12 | 2.62E-02 | transcription_start_site | - | 103135 | 103135 | 603   | 6713 | AN11100 |
| 783  | CONTIG158 | 102394 | 102669 | 2.12 | 2.62E-02 | transcription_start_site | - | 103536 | 103536 | 1004  | 6712 | AN11100 |
| 1539 | CONTIG160 | 13351  | 14311  | 1.57 | 1.25E-01 | transcription_start_site | + | 17545  | 17545  | -3714 | 6715 | AN11101 |
| 1539 | CONTIG160 | 13351  | 14311  | 1.57 | 1.25E-01 | transcription_start_site | + | 18181  | 18181  | -4350 | 6716 | AN11101 |
| 1539 | CONTIG160 | 13351  | 14311  | 1.57 | 1.25E-01 | transcription_start_site | + | 18956  | 18956  | -5125 | 6717 | AN11101 |
| 1085 | CONTIG160 | 80267  | 80601  | 1.85 | 5.88E-02 | transcription_start_site | + | 79908  | 79908  | 526   | 6731 | AN11104 |
| 1085 | CONTIG160 | 80267  | 80601  | 1.85 | 5.88E-02 | transcription_start_site | + | 79639  | 79639  | 795   | 6730 | AN11104 |
| 1085 | CONTIG160 | 80267  | 80601  | 1.85 | 5.88E-02 | transcription_start_site | + | 81692  | 81692  | -1258 | 6732 | AN11104 |
| 214  | CONTIG160 | 125112 | 125381 | 2.91 | 1.80E-03 | transcription_start_site | + | 127330 | 127330 | -2083 | 6733 | AN11105 |
| 214  | CONTIG160 | 125112 | 125381 | 2.91 | 1.80E-03 | transcription_start_site | + | 128289 | 128289 | -3042 | 6734 | AN11105 |
| 1085 | CONTIG160 | 80267  | 80601  | 1.85 | 5.88E-02 | transcription_start_site | + | 82215  | 82215  | -1781 | 6737 | AN11107 |
| 1085 | CONTIG160 | 80267  | 80601  | 1.85 | 5.88E-02 | transcription_start_site | + | 82807  | 82807  | -2373 | 6738 | AN11107 |
| 1085 | CONTIG160 | 80267  | 80601  | 1.85 | 5.88E-02 | transcription_start_site | + | 83490  | 83490  | -3056 | 6739 | AN11107 |
| 214  | CONTIG160 | 125112 | 125381 | 2.91 | 1.80E-03 | transcription_start_site | + | 125879 | 125879 | -632  | 6740 | AN11108 |
| 1539 | CONTIG160 | 13351  | 14311  | 1.57 | 1.25E-01 | transcription_start_site | + | 15719  | 15719  | -1888 | 6741 | AN11109 |
| 1539 | CONTIG160 | 13351  | 14311  | 1.57 | 1.25E-01 | transcription_start_site | + | 16061  | 16061  | -2230 | 6742 | AN11109 |
| 1929 | CONTIG160 | 51617  | 51956  | 1.4  | 1.93E-01 | transcription_start_site | + | 50995  | 50995  | 791   | 6744 | AN11110 |
| 306  | CONTIG161 | 69904  | 70263  | 2.76 | 4.61E-03 | transcription_start_site | + | 70318  | 70318  | -234  | 6749 | AN11112 |
| 306  | CONTIG161 | 69904  | 70263  | 2.76 | 4.61E-03 | transcription_start_site | + | 70486  | 70486  | -402  | 6750 | AN11112 |
| 306  | CONTIG161 | 69904  | 70263  | 2.76 | 4.61E-03 | transcription_start_site | + | 70594  | 70594  | -510  | 6751 | AN11112 |

|      |           |        |        |      |          |                          |   |        |        |       |      |         |
|------|-----------|--------|--------|------|----------|--------------------------|---|--------|--------|-------|------|---------|
| 306  | CONTIG161 | 69904  | 70263  | 2.76 | 4.61E-03 | transcription_start_site | + | 70754  | 70754  | -670  | 6752 | AN11112 |
| 1474 | CONTIG161 | 66156  | 66594  | 1.61 | 1.25E-01 | transcription_start_site | + | 70318  | 70318  | -3943 | 6749 | AN11112 |
| 1474 | CONTIG161 | 66156  | 66594  | 1.61 | 1.25E-01 | transcription_start_site | + | 70486  | 70486  | -4111 | 6750 | AN11112 |
| 1474 | CONTIG161 | 66156  | 66594  | 1.61 | 1.25E-01 | transcription_start_site | + | 70594  | 70594  | -4219 | 6751 | AN11112 |
| 1474 | CONTIG161 | 66156  | 66594  | 1.61 | 1.25E-01 | transcription_start_site | + | 70754  | 70754  | -4379 | 6752 | AN11112 |
| 1846 | CONTIG161 | 97358  | 97777  | 1.44 | 1.93E-01 | transcription_start_site | + | 100760 | 100760 | -3192 | 6753 | AN11113 |
| 1846 | CONTIG161 | 97358  | 97777  | 1.44 | 1.93E-01 | transcription_start_site | + | 101182 | 101182 | -3614 | 6754 | AN11113 |
| 1846 | CONTIG161 | 97358  | 97777  | 1.44 | 1.93E-01 | transcription_start_site | + | 101291 | 101291 | -3723 | 6755 | AN11113 |
| 1846 | CONTIG161 | 97358  | 97777  | 1.44 | 1.93E-01 | transcription_start_site | + | 101488 | 101488 | -3920 | 6756 | AN11113 |
| 1846 | CONTIG161 | 97358  | 97777  | 1.44 | 1.93E-01 | transcription_start_site | + | 101680 | 101680 | -4112 | 6757 | AN11113 |
| 1846 | CONTIG161 | 97358  | 97777  | 1.44 | 1.93E-01 | transcription_start_site | + | 102192 | 102192 | -4624 | 6758 | AN11113 |
| 1846 | CONTIG161 | 97358  | 97777  | 1.44 | 1.93E-01 | transcription_start_site | + | 102770 | 102770 | -5202 | 6759 | AN11113 |
| 306  | CONTIG161 | 69904  | 70263  | 2.76 | 4.61E-03 | transcription_start_site | + | 71963  | 71963  | -1879 | 6773 | AN11118 |
| 306  | CONTIG161 | 69904  | 70263  | 2.76 | 4.61E-03 | transcription_start_site | + | 72412  | 72412  | -2328 | 6774 | AN11118 |
| 832  | CONTIG161 | 104790 | 105279 | 2.07 | 2.18E-02 | transcription_start_site | + | 105104 | 105104 | -69   | 6776 | AN11119 |
| 832  | CONTIG161 | 104790 | 105279 | 2.07 | 2.18E-02 | transcription_start_site | + | 104956 | 104956 | 78    | 6775 | AN11119 |
| 832  | CONTIG161 | 104790 | 105279 | 2.07 | 2.18E-02 | transcription_start_site | + | 105663 | 105663 | -628  | 6777 | AN11119 |
| 832  | CONTIG161 | 104790 | 105279 | 2.07 | 2.18E-02 | transcription_start_site | + | 106029 | 106029 | -994  | 6778 | AN11119 |
| 832  | CONTIG161 | 104790 | 105279 | 2.07 | 2.18E-02 | transcription_start_site | + | 106383 | 106383 | -1348 | 6779 | AN11119 |
| 1475 | CONTIG161 | 103878 | 104537 | 1.61 | 1.25E-01 | transcription_start_site | + | 104956 | 104956 | -748  | 6775 | AN11119 |
| 1475 | CONTIG161 | 103878 | 104537 | 1.61 | 1.25E-01 | transcription_start_site | + | 105104 | 105104 | -896  | 6776 | AN11119 |
| 1475 | CONTIG161 | 103878 | 104537 | 1.61 | 1.25E-01 | transcription_start_site | + | 105663 | 105663 | -1455 | 6777 | AN11119 |
| 1475 | CONTIG161 | 103878 | 104537 | 1.61 | 1.25E-01 | transcription_start_site | + | 106029 | 106029 | -1821 | 6778 | AN11119 |
| 1475 | CONTIG161 | 103878 | 104537 | 1.61 | 1.25E-01 | transcription_start_site | + | 106383 | 106383 | -2175 | 6779 | AN11119 |
| 2090 | CONTIG16  | 226217 | 226486 | 1.34 | 1.44E-01 | transcription_start_site | - | 223510 | 223510 | -2841 | 6780 | AN11112 |
| 832  | CONTIG161 | 104790 | 105279 | 2.07 | 2.18E-02 | transcription_start_site | + | 107486 | 107486 | -2451 | 6781 | AN11120 |
| 832  | CONTIG161 | 104790 | 105279 | 2.07 | 2.18E-02 | transcription_start_site | + | 107970 | 107970 | -2935 | 6782 | AN11120 |
| 832  | CONTIG161 | 104790 | 105279 | 2.07 | 2.18E-02 | transcription_start_site | + | 108409 | 108409 | -3374 | 6783 | AN11120 |
| 1475 | CONTIG161 | 103878 | 104537 | 1.61 | 1.25E-01 | transcription_start_site | + | 107486 | 107486 | -3278 | 6781 | AN11120 |
| 1475 | CONTIG161 | 103878 | 104537 | 1.61 | 1.25E-01 | transcription_start_site | + | 107970 | 107970 | -3762 | 6782 | AN11120 |
| 1475 | CONTIG161 | 103878 | 104537 | 1.61 | 1.25E-01 | transcription_start_site | + | 108409 | 108409 | -4201 | 6783 | AN11120 |
| 832  | CONTIG161 | 104790 | 105279 | 2.07 | 2.18E-02 | transcription_start_site | + | 110232 | 110232 | -5197 | 6784 | AN11121 |
| 88   | CONTIG161 | 121596 | 122010 | 3.27 | 8.69E-04 | transcription_start_site | + | 120909 | 120909 | 894   | 6787 | AN11122 |
| 1030 | CONTIG161 | 60161  | 60510  | 1.89 | 5.88E-02 | transcription_start_site | - | 60071  | 60071  | -264  | 6790 | AN11124 |
| 1584 | CONTIG161 | 64746  | 65016  | 1.55 | 1.44E-01 | transcription_start_site | - | 60071  | 60071  | -4810 | 6790 | AN11124 |
| 382  | CONTIG162 | 56033  | 56387  | 2.63 | 2.16E-04 | transcription_start_site | + | 59846  | 59846  | -3636 | 6794 | AN11126 |
| 382  | CONTIG162 | 56033  | 56387  | 2.63 | 2.16E-04 | transcription_start_site | + | 60749  | 60749  | -4539 | 6795 | AN11126 |
| 382  | CONTIG162 | 56033  | 56387  | 2.63 | 2.16E-04 | transcription_start_site | + | 61190  | 61190  | -4980 | 6796 | AN11126 |
| 1812 | CONTIG162 | 54603  | 55037  | 1.45 | 5.88E-02 | transcription_start_site | + | 59846  | 59846  | -5026 | 6794 | AN11126 |
| 2837 | CONTIG163 | 42240  | 42521  | 1.04 | 2.12E-02 | transcription_start_site | - | 38577  | 38577  | -3803 | 6800 | AN11129 |
| 2837 | CONTIG163 | 42240  | 42521  | 1.04 | 2.12E-02 | transcription_start_site | - | 37758  | 37758  | -4622 | 6801 | AN11129 |
| 2090 | CONTIG16  | 226217 | 226486 | 1.34 | 1.44E-01 | transcription_start_site | - | 225012 | 225012 | -1339 | 6802 | AN11113 |
| 2090 | CONTIG16  | 226217 | 226486 | 1.34 | 1.44E-01 | transcription_start_site | - | 224938 | 224938 | -1413 | 6803 | AN11113 |
| 2090 | CONTIG16  | 226217 | 226486 | 1.34 | 1.44E-01 | transcription_start_site | - | 224577 | 224577 | -1774 | 6804 | AN11113 |
| 2752 | CONTIG163 | 88216  | 88570  | 1.09 | 1.57E-02 | transcription_start_site | - | 85608  | 85608  | -2785 | 6805 | AN11130 |
| 2752 | CONTIG163 | 88216  | 88570  | 1.09 | 1.57E-02 | transcription_start_site | - | 85359  | 85359  | -3034 | 6806 | AN11130 |
| 2752 | CONTIG163 | 88216  | 88570  | 1.09 | 1.57E-02 | transcription_start_site | - | 88129  | 88129  | -264  | 6807 | AN11131 |
| 2752 | CONTIG163 | 88216  | 88570  | 1.09 | 1.57E-02 | transcription_start_site | - | 88040  | 88040  | -353  | 6808 | AN11131 |
| 2752 | CONTIG163 | 88216  | 88570  | 1.09 | 1.57E-02 | transcription_start_site | - | 87947  | 87947  | -446  | 6809 | AN11131 |
| 2752 | CONTIG163 | 88216  | 88570  | 1.09 | 1.57E-02 | transcription_start_site | - | 87753  | 87753  | -640  | 6810 | AN11131 |
| 3035 | CONTIG163 | 46655  | 47319  | 0.82 | 8.01E-02 | transcription_start_site | - | 48216  | 48216  | 1229  | 6818 | AN11136 |
| 3066 | CONTIG163 | 52666  | 53080  | 0.66 | 1.93E-01 | transcription_start_site | - | 48412  | 48412  | -4461 | 6817 | AN11136 |
| 3066 | CONTIG163 | 52666  | 53080  | 0.66 | 1.93E-01 | transcription_start_site | - | 48216  | 48216  | -4657 | 6818 | AN11136 |
| 2721 | CONTIG163 | 78770  | 79116  | 1.11 | 5.41E-03 | transcription_start_site | - | 73836  | 73836  | -5107 | 6819 | AN11137 |
| 3034 | CONTIG163 | 20195  | 20454  | 0.82 | 8.01E-02 | transcription_start_site | - | 15511  | 15511  | -4813 | 6821 | AN11138 |
| 2090 | CONTIG16  | 226217 | 226486 | 1.34 | 1.44E-01 | transcription_start_site | - | 226650 | 226650 | 298   | 6828 | AN11114 |
| 2090 | CONTIG16  | 226217 | 226486 | 1.34 | 1.44E-01 | transcription_start_site | - | 225987 | 225987 | -364  | 6829 | AN11114 |

|      |           |        |        |      |          |                          |   |        |        |       |      |         |
|------|-----------|--------|--------|------|----------|--------------------------|---|--------|--------|-------|------|---------|
| 1444 | CONTIG164 | 57980  | 58259  | 1.61 | 8.81E-03 | transcription_start_site | + | 61565  | 61565  | -3445 | 6830 | AN11141 |
| 1444 | CONTIG164 | 57980  | 58259  | 1.61 | 8.81E-03 | transcription_start_site | + | 61827  | 61827  | -3707 | 6831 | AN11141 |
| 1100 | CONTIG164 | 91292  | 91856  | 1.83 | 0.00E+00 | transcription_start_site | - | 88938  | 88938  | -2636 | 6832 | AN11142 |
| 1100 | CONTIG164 | 91292  | 91856  | 1.83 | 0.00E+00 | transcription_start_site | - | 88692  | 88692  | -2882 | 6833 | AN11142 |
| 1100 | CONTIG164 | 91292  | 91856  | 1.83 | 0.00E+00 | transcription_start_site | - | 88200  | 88200  | -3374 | 6834 | AN11142 |
| 1100 | CONTIG164 | 91292  | 91856  | 1.83 | 0.00E+00 | transcription_start_site | - | 87767  | 87767  | -3807 | 6835 | AN11142 |
| 1588 | CONTIG164 | 90007  | 90281  | 1.54 | 1.30E-02 | transcription_start_site | - | 88938  | 88938  | -1206 | 6832 | AN11142 |
| 1588 | CONTIG164 | 90007  | 90281  | 1.54 | 1.30E-02 | transcription_start_site | - | 88692  | 88692  | -1452 | 6833 | AN11142 |
| 1588 | CONTIG164 | 90007  | 90281  | 1.54 | 1.30E-02 | transcription_start_site | - | 88200  | 88200  | -1944 | 6834 | AN11142 |
| 1588 | CONTIG164 | 90007  | 90281  | 1.54 | 1.30E-02 | transcription_start_site | - | 87767  | 87767  | -2377 | 6835 | AN11142 |
| 3070 | CONTIG164 | 91892  | 95321  | 0.62 | 0.00E+00 | transcription_start_site | - | 88938  | 88938  | -4668 | 6832 | AN11142 |
| 3070 | CONTIG164 | 91892  | 95321  | 0.62 | 0.00E+00 | transcription_start_site | - | 88692  | 88692  | -4914 | 6833 | AN11142 |
| 3070 | CONTIG164 | 91892  | 95321  | 0.62 | 0.00E+00 | transcription_start_site | - | 88200  | 88200  | -5406 | 6834 | AN11142 |
| 3070 | CONTIG164 | 91892  | 95321  | 0.62 | 0.00E+00 | transcription_start_site | - | 87767  | 87767  | -5839 | 6835 | AN11142 |
| 1849 | CONTIG164 | 104943 | 105502 | 1.43 | 1.06E-02 | transcription_start_site | + | 107189 | 107189 | -1966 | 6836 | AN11143 |
| 1849 | CONTIG164 | 104943 | 105502 | 1.43 | 1.06E-02 | transcription_start_site | + | 107489 | 107489 | -2266 | 6837 | AN11143 |
| 1849 | CONTIG164 | 104943 | 105502 | 1.43 | 1.06E-02 | transcription_start_site | + | 107823 | 107823 | -2600 | 6838 | AN11143 |
| 1849 | CONTIG164 | 104943 | 105502 | 1.43 | 1.06E-02 | transcription_start_site | + | 107969 | 107969 | -2746 | 6839 | AN11143 |
| 1849 | CONTIG164 | 104943 | 105502 | 1.43 | 1.06E-02 | transcription_start_site | + | 108664 | 108664 | -3441 | 6840 | AN11143 |
| 2867 | CONTIG164 | 105838 | 106112 | 1.03 | 1.25E-01 | transcription_start_site | + | 107189 | 107189 | -1214 | 6836 | AN11143 |
| 2867 | CONTIG164 | 105838 | 106112 | 1.03 | 1.25E-01 | transcription_start_site | + | 107489 | 107489 | -1514 | 6837 | AN11143 |
| 2867 | CONTIG164 | 105838 | 106112 | 1.03 | 1.25E-01 | transcription_start_site | + | 107823 | 107823 | -1848 | 6838 | AN11143 |
| 2867 | CONTIG164 | 105838 | 106112 | 1.03 | 1.25E-01 | transcription_start_site | + | 107969 | 107969 | -1994 | 6839 | AN11143 |
| 2867 | CONTIG164 | 105838 | 106112 | 1.03 | 1.25E-01 | transcription_start_site | + | 108664 | 108664 | -2689 | 6840 | AN11143 |
| 260  | CONTIG164 | 48385  | 48891  | 2.82 | 0.00E+00 | transcription_start_site | + | 52506  | 52506  | -3868 | 6841 | AN11144 |
| 260  | CONTIG164 | 48385  | 48891  | 2.82 | 0.00E+00 | transcription_start_site | + | 53497  | 53497  | -4859 | 6842 | AN11144 |
| 2032 | CONTIG164 | 41779  | 42128  | 1.36 | 3.08E-02 | transcription_start_site | + | 42157  | 42157  | -203  | 6843 | AN11145 |
| 2032 | CONTIG164 | 41779  | 42128  | 1.36 | 3.08E-02 | transcription_start_site | + | 42295  | 42295  | -341  | 6844 | AN11145 |
| 2032 | CONTIG164 | 41779  | 42128  | 1.36 | 3.08E-02 | transcription_start_site | + | 42511  | 42511  | -557  | 6845 | AN11145 |
| 2460 | CONTIG164 | 43205  | 43635  | 1.21 | 3.61E-02 | transcription_start_site | + | 42511  | 42511  | 909   | 6845 | AN11145 |
| 2460 | CONTIG164 | 43205  | 43635  | 1.21 | 3.61E-02 | transcription_start_site | + | 42295  | 42295  | 1125  | 6844 | AN11145 |
| 3003 | CONTIG164 | 39757  | 40101  | 0.92 | 1.93E-01 | transcription_start_site | + | 42157  | 42157  | -2228 | 6843 | AN11145 |
| 3003 | CONTIG164 | 39757  | 40101  | 0.92 | 1.93E-01 | transcription_start_site | + | 42295  | 42295  | -2366 | 6844 | AN11145 |
| 3003 | CONTIG164 | 39757  | 40101  | 0.92 | 1.93E-01 | transcription_start_site | + | 42511  | 42511  | -2582 | 6845 | AN11145 |
| 2032 | CONTIG164 | 41779  | 42128  | 1.36 | 3.08E-02 | transcription_start_site | - | 40142  | 40142  | -1811 | 6846 | AN11146 |
| 2032 | CONTIG164 | 41779  | 42128  | 1.36 | 3.08E-02 | transcription_start_site | - | 39991  | 39991  | -1962 | 6847 | AN11146 |
| 2032 | CONTIG164 | 41779  | 42128  | 1.36 | 3.08E-02 | transcription_start_site | - | 39754  | 39754  | -2199 | 6848 | AN11146 |
| 2032 | CONTIG164 | 41779  | 42128  | 1.36 | 3.08E-02 | transcription_start_site | - | 39576  | 39576  | -2377 | 6849 | AN11146 |
| 2032 | CONTIG164 | 41779  | 42128  | 1.36 | 3.08E-02 | transcription_start_site | - | 39402  | 39402  | -2551 | 6850 | AN11146 |
| 2460 | CONTIG164 | 43205  | 43635  | 1.21 | 3.61E-02 | transcription_start_site | - | 40142  | 40142  | -3278 | 6846 | AN11146 |
| 2460 | CONTIG164 | 43205  | 43635  | 1.21 | 3.61E-02 | transcription_start_site | - | 39991  | 39991  | -3429 | 6847 | AN11146 |
| 2460 | CONTIG164 | 43205  | 43635  | 1.21 | 3.61E-02 | transcription_start_site | - | 39754  | 39754  | -3666 | 6848 | AN11146 |
| 2460 | CONTIG164 | 43205  | 43635  | 1.21 | 3.61E-02 | transcription_start_site | - | 39576  | 39576  | -3844 | 6849 | AN11146 |
| 2460 | CONTIG164 | 43205  | 43635  | 1.21 | 3.61E-02 | transcription_start_site | - | 39402  | 39402  | -4018 | 6850 | AN11146 |
| 3003 | CONTIG164 | 39757  | 40101  | 0.92 | 1.93E-01 | transcription_start_site | - | 39991  | 39991  | 62    | 6847 | AN11146 |
| 3003 | CONTIG164 | 39757  | 40101  | 0.92 | 1.93E-01 | transcription_start_site | - | 39754  | 39754  | -175  | 6848 | AN11146 |
| 3003 | CONTIG164 | 39757  | 40101  | 0.92 | 1.93E-01 | transcription_start_site | - | 40142  | 40142  | 213   | 6846 | AN11146 |
| 3003 | CONTIG164 | 39757  | 40101  | 0.92 | 1.93E-01 | transcription_start_site | - | 39576  | 39576  | -353  | 6849 | AN11146 |
| 3003 | CONTIG164 | 39757  | 40101  | 0.92 | 1.93E-01 | transcription_start_site | - | 39402  | 39402  | -527  | 6850 | AN11146 |
| 1849 | CONTIG164 | 104943 | 105502 | 1.43 | 1.06E-02 | transcription_start_site | + | 109717 | 109717 | -4494 | 6853 | AN11149 |
| 1849 | CONTIG164 | 104943 | 105502 | 1.43 | 1.06E-02 | transcription_start_site | + | 110042 | 110042 | -4819 | 6854 | AN11149 |
| 2867 | CONTIG164 | 105838 | 106112 | 1.03 | 1.25E-01 | transcription_start_site | + | 109717 | 109717 | -3742 | 6853 | AN11149 |
| 2867 | CONTIG164 | 105838 | 106112 | 1.03 | 1.25E-01 | transcription_start_site | + | 110042 | 110042 | -4067 | 6854 | AN11149 |
| 2867 | CONTIG164 | 105838 | 106112 | 1.03 | 1.25E-01 | transcription_start_site | + | 110560 | 110560 | -4585 | 6855 | AN11149 |
| 2867 | CONTIG164 | 105838 | 106112 | 1.03 | 1.25E-01 | transcription_start_site | + | 111087 | 111087 | -5112 | 6856 | AN11149 |
| 1100 | CONTIG164 | 91292  | 91856  | 1.83 | 0.00E+00 | transcription_start_site | - | 86817  | 86817  | -4757 | 6864 | AN11150 |
| 1100 | CONTIG164 | 91292  | 91856  | 1.83 | 0.00E+00 | transcription_start_site | - | 86535  | 86535  | -5039 | 6865 | AN11150 |

|      |           |        |        |      |          |                          |   |        |        |       |      |         |
|------|-----------|--------|--------|------|----------|--------------------------|---|--------|--------|-------|------|---------|
| 1588 | CONTIG164 | 90007  | 90281  | 1.54 | 1.30E-02 | transcription_start_site | - | 86817  | 86817  | -3327 | 6864 | AN11150 |
| 1588 | CONTIG164 | 90007  | 90281  | 1.54 | 1.30E-02 | transcription_start_site | - | 86535  | 86535  | -3609 | 6865 | AN11150 |
| 981  | CONTIG165 | 50180  | 50604  | 1.92 | 1.35E-03 | transcription_start_site | - | 49773  | 49773  | -619  | 6866 | AN11151 |
| 981  | CONTIG165 | 50180  | 50604  | 1.92 | 1.35E-03 | transcription_start_site | - | 48975  | 48975  | -1417 | 6867 | AN11151 |
| 349  | CONTIG165 | 94355  | 94719  | 2.68 | 0.00E+00 | transcription_start_site | + | 98030  | 98030  | -3493 | 6868 | AN11152 |
| 349  | CONTIG165 | 94355  | 94719  | 2.68 | 0.00E+00 | transcription_start_site | + | 98155  | 98155  | -3618 | 6869 | AN11152 |
| 349  | CONTIG165 | 94355  | 94719  | 2.68 | 0.00E+00 | transcription_start_site | + | 98239  | 98239  | -3702 | 6870 | AN11152 |
| 349  | CONTIG165 | 94355  | 94719  | 2.68 | 0.00E+00 | transcription_start_site | + | 98308  | 98308  | -3771 | 6871 | AN11152 |
| 349  | CONTIG165 | 94355  | 94719  | 2.68 | 0.00E+00 | transcription_start_site | + | 99142  | 99142  | -4605 | 6872 | AN11152 |
| 2467 | CONTIG165 | 96006  | 97625  | 1.21 | 5.82E-02 | transcription_start_site | + | 98030  | 98030  | -1214 | 6868 | AN11152 |
| 2467 | CONTIG165 | 96006  | 97625  | 1.21 | 5.82E-02 | transcription_start_site | + | 98155  | 98155  | -1339 | 6869 | AN11152 |
| 2467 | CONTIG165 | 96006  | 97625  | 1.21 | 5.82E-02 | transcription_start_site | + | 98239  | 98239  | -1423 | 6870 | AN11152 |
| 2467 | CONTIG165 | 96006  | 97625  | 1.21 | 5.82E-02 | transcription_start_site | + | 98308  | 98308  | -1492 | 6871 | AN11152 |
| 2467 | CONTIG165 | 96006  | 97625  | 1.21 | 5.82E-02 | transcription_start_site | + | 99142  | 99142  | -2326 | 6872 | AN11152 |
| 2684 | CONTIG165 | 99171  | 99650  | 1.13 | 1.44E-01 | transcription_start_site | + | 99142  | 99142  | 268   | 6872 | AN11152 |
| 2684 | CONTIG165 | 99171  | 99650  | 1.13 | 1.44E-01 | transcription_start_site | + | 98308  | 98308  | 1102  | 6871 | AN11152 |
| 2684 | CONTIG165 | 99171  | 99650  | 1.13 | 1.44E-01 | transcription_start_site | + | 98239  | 98239  | 1171  | 6870 | AN11152 |
| 981  | CONTIG165 | 50180  | 50604  | 1.92 | 1.35E-03 | transcription_start_site | - | 47922  | 47922  | -2470 | 6873 | AN11153 |
| 981  | CONTIG165 | 50180  | 50604  | 1.92 | 1.35E-03 | transcription_start_site | - | 47683  | 47683  | -2709 | 6874 | AN11153 |
| 981  | CONTIG165 | 50180  | 50604  | 1.92 | 1.35E-03 | transcription_start_site | - | 47514  | 47514  | -2878 | 6875 | AN11153 |
| 981  | CONTIG165 | 50180  | 50604  | 1.92 | 1.35E-03 | transcription_start_site | - | 47309  | 47309  | -3083 | 6876 | AN11153 |
| 981  | CONTIG165 | 50180  | 50604  | 1.92 | 1.35E-03 | transcription_start_site | - | 46571  | 46571  | -3821 | 6877 | AN11153 |
| 981  | CONTIG165 | 50180  | 50604  | 1.92 | 1.35E-03 | transcription_start_site | - | 46338  | 46338  | -4054 | 6878 | AN11153 |
| 981  | CONTIG165 | 50180  | 50604  | 1.92 | 1.35E-03 | transcription_start_site | - | 45745  | 45745  | -4647 | 6879 | AN11154 |
| 981  | CONTIG165 | 50180  | 50604  | 1.92 | 1.35E-03 | transcription_start_site | - | 45379  | 45379  | -5013 | 6880 | AN11154 |
| 349  | CONTIG165 | 94355  | 94719  | 2.68 | 0.00E+00 | transcription_start_site | + | 97367  | 97367  | -2830 | 6881 | AN11155 |
| 349  | CONTIG165 | 94355  | 94719  | 2.68 | 0.00E+00 | transcription_start_site | + | 97502  | 97502  | -2965 | 6882 | AN11155 |
| 2467 | CONTIG165 | 96006  | 97625  | 1.21 | 5.82E-02 | transcription_start_site | + | 97367  | 97367  | -551  | 6881 | AN11155 |
| 2467 | CONTIG165 | 96006  | 97625  | 1.21 | 5.82E-02 | transcription_start_site | + | 97502  | 97502  | -686  | 6882 | AN11155 |
| 472  | CONTIG167 | 12082  | 12351  | 2.48 | 4.61E-03 | transcription_start_site | - | 10890  | 10890  | -1326 | 6883 | AN11156 |
| 472  | CONTIG167 | 12082  | 12351  | 2.48 | 4.61E-03 | transcription_start_site | - | 10713  | 10713  | -1503 | 6884 | AN11156 |
| 472  | CONTIG167 | 12082  | 12351  | 2.48 | 4.61E-03 | transcription_start_site | - | 9473   | 9473   | -2743 | 6885 | AN11157 |
| 472  | CONTIG167 | 12082  | 12351  | 2.48 | 4.61E-03 | transcription_start_site | - | 9303   | 9303   | -2913 | 6886 | AN11157 |
| 217  | CONTIG168 | 121218 | 121575 | 2.9  | 0.00E+00 | transcription_start_site | - | 117956 | 117956 | -3440 | 6887 | AN11158 |
| 217  | CONTIG168 | 121218 | 121575 | 2.9  | 0.00E+00 | transcription_start_site | - | 117644 | 117644 | -3752 | 6888 | AN11158 |
| 217  | CONTIG168 | 121218 | 121575 | 2.9  | 0.00E+00 | transcription_start_site | - | 117253 | 117253 | -4143 | 6889 | AN11158 |
| 2183 | CONTIG168 | 172954 | 173393 | 1.3  | 8.01E-02 | transcription_start_site | + | 177078 | 177078 | -3904 | 6890 | AN11159 |
| 2183 | CONTIG168 | 172954 | 173393 | 1.3  | 8.01E-02 | transcription_start_site | + | 177285 | 177285 | -4111 | 6891 | AN11159 |
| 2183 | CONTIG168 | 172954 | 173393 | 1.3  | 8.01E-02 | transcription_start_site | + | 177483 | 177483 | -4309 | 6892 | AN11159 |
| 2183 | CONTIG168 | 172954 | 173393 | 1.3  | 8.01E-02 | transcription_start_site | + | 177924 | 177924 | -4750 | 6893 | AN11159 |
| 2183 | CONTIG168 | 172954 | 173393 | 1.3  | 8.01E-02 | transcription_start_site | + | 178035 | 178035 | -4861 | 6894 | AN11159 |
| 2759 | CONTIG168 | 171834 | 172328 | 1.09 | 1.66E-01 | transcription_start_site | + | 177078 | 177078 | -4997 | 6890 | AN11159 |
| 2759 | CONTIG168 | 171834 | 172328 | 1.09 | 1.66E-01 | transcription_start_site | + | 177285 | 177285 | -5204 | 6891 | AN11159 |
| 2090 | CONTIG16  | 226217 | 226486 | 1.34 | 1.44E-01 | transcription_start_site | + | 231425 | 231425 | -5073 | 6895 | AN11116 |
| 217  | CONTIG168 | 121218 | 121575 | 2.9  | 0.00E+00 | transcription_start_site | - | 116254 | 116254 | -5142 | 6896 | AN11160 |
| 387  | CONTIG169 | 142438 | 142927 | 2.62 | 2.67E-04 | transcription_start_site | - | 139572 | 139572 | -3110 | 6907 | AN11164 |
| 387  | CONTIG169 | 142438 | 142927 | 2.62 | 2.67E-04 | transcription_start_site | - | 138748 | 138748 | -3934 | 6908 | AN11164 |
| 387  | CONTIG169 | 142438 | 142927 | 2.62 | 2.67E-04 | transcription_start_site | - | 138470 | 138470 | -4212 | 6909 | AN11164 |
| 387  | CONTIG169 | 142438 | 142927 | 2.62 | 2.67E-04 | transcription_start_site | - | 138283 | 138283 | -4399 | 6910 | AN11164 |
| 387  | CONTIG169 | 142438 | 142927 | 2.62 | 2.67E-04 | transcription_start_site | - | 137984 | 137984 | -4698 | 6911 | AN11164 |
| 1451 | CONTIG169 | 169445 | 169714 | 1.61 | 2.62E-02 | transcription_start_site | + | 170538 | 170538 | -958  | 6913 | AN11165 |
| 1451 | CONTIG169 | 169445 | 169714 | 1.61 | 2.62E-02 | transcription_start_site | + | 170713 | 170713 | -1133 | 6914 | AN11165 |
| 2282 | CONTIG169 | 173180 | 174436 | 1.27 | 7.02E-02 | transcription_start_site | - | 174673 | 174673 | 865   | 6918 | AN11166 |
| 1057 | CONTIG169 | 232520 | 232784 | 1.86 | 8.81E-03 | transcription_start_site | + | 233124 | 233124 | -472  | 6919 | AN11167 |
| 2816 | CONTIG169 | 255531 | 255800 | 1.06 | 1.93E-01 | transcription_start_site | - | 256405 | 256405 | 739   | 6921 | AN11168 |
| 2816 | CONTIG169 | 255531 | 255800 | 1.06 | 1.93E-01 | transcription_start_site | - | 256597 | 256597 | 931   | 6920 | AN11168 |
| 1745 | CONTIG169 | 284708 | 284977 | 1.48 | 4.36E-02 | transcription_start_site | + | 287184 | 287184 | -2341 | 6922 | AN11169 |

|                |        |        |      |          |                          |   |        |        |       |              |
|----------------|--------|--------|------|----------|--------------------------|---|--------|--------|-------|--------------|
| 1745 CONTIG169 | 284708 | 284977 | 1.48 | 4.36E-02 | transcription_start_site | + | 287474 | 287474 | -2631 | 6923 AN11169 |
| 1745 CONTIG169 | 284708 | 284977 | 1.48 | 4.36E-02 | transcription_start_site | + | 288041 | 288041 | -3198 | 6924 AN11169 |
| 1745 CONTIG169 | 284708 | 284977 | 1.48 | 4.36E-02 | transcription_start_site | + | 288241 | 288241 | -3398 | 6925 AN11169 |
| 1745 CONTIG169 | 284708 | 284977 | 1.48 | 4.36E-02 | transcription_start_site | + | 288464 | 288464 | -3621 | 6926 AN11169 |
| 1451 CONTIG169 | 169445 | 169714 | 1.61 | 2.62E-02 | transcription_start_site | + | 169509 | 169509 | 70    | 6946 AN11176 |
| 2282 CONTIG169 | 173180 | 174436 | 1.27 | 7.02E-02 | transcription_start_site | - | 174246 | 174246 | 438   | 6947 AN11177 |
| 912 CONTIG169  | 235968 | 236227 | 1.99 | 5.20E-03 | transcription_start_site | + | 235334 | 235334 | 763   | 6949 AN11178 |
| 912 CONTIG169  | 235968 | 236227 | 1.99 | 5.20E-03 | transcription_start_site | + | 235129 | 235129 | 968   | 6948 AN11178 |
| 1057 CONTIG169 | 232520 | 232784 | 1.86 | 8.81E-03 | transcription_start_site | + | 235129 | 235129 | -2477 | 6948 AN11178 |
| 1057 CONTIG169 | 232520 | 232784 | 1.86 | 8.81E-03 | transcription_start_site | + | 235334 | 235334 | -2682 | 6949 AN11178 |
| 1309 CONTIG16  | 240239 | 240803 | 1.69 | 5.22E-02 | transcription_start_site | - | 237451 | 237451 | -3070 | 6951 AN1118  |
| 774 CONTIG169  | 289503 | 289777 | 2.12 | 3.03E-03 | transcription_start_site | + | 289688 | 289688 | -48   | 6968 AN11184 |
| 774 CONTIG169  | 289503 | 289777 | 2.12 | 3.03E-03 | transcription_start_site | + | 290448 | 290448 | -808  | 6969 AN11184 |
| 1745 CONTIG169 | 284708 | 284977 | 1.48 | 4.36E-02 | transcription_start_site | + | 289688 | 289688 | -4845 | 6968 AN11184 |
| 774 CONTIG169  | 289503 | 289777 | 2.12 | 3.03E-03 | transcription_start_site | + | 291182 | 291182 | -1542 | 6970 AN11185 |
| 774 CONTIG169  | 289503 | 289777 | 2.12 | 3.03E-03 | transcription_start_site | + | 292449 | 292449 | -2809 | 6971 AN11185 |
| 2288 CONTIG169 | 291768 | 292037 | 1.27 | 9.24E-02 | transcription_start_site | + | 292449 | 292449 | -546  | 6971 AN11185 |
| 2288 CONTIG169 | 291768 | 292037 | 1.27 | 9.24E-02 | transcription_start_site | + | 291182 | 291182 | 720   | 6970 AN11185 |
| 2161 CONTIG169 | 326496 | 326985 | 1.31 | 6.16E-02 | transcription_start_site | - | 327655 | 327655 | 914   | 6980 AN11187 |
| 2830 CONTIG170 | 24842  | 25401  | 1.05 | 1.66E-01 | transcription_start_site | - | 20565  | 20565  | -4556 | 6981 AN11188 |
| 2830 CONTIG170 | 24842  | 25401  | 1.05 | 1.66E-01 | transcription_start_site | - | 20295  | 20295  | -4826 | 6982 AN11188 |
| 2830 CONTIG170 | 24842  | 25401  | 1.05 | 1.66E-01 | transcription_start_site | - | 20064  | 20064  | -5057 | 6983 AN11188 |
| 1309 CONTIG16  | 240239 | 240803 | 1.69 | 5.22E-02 | transcription_start_site | - | 239192 | 239192 | -1329 | 6992 AN1119  |
| 1309 CONTIG16  | 240239 | 240803 | 1.69 | 5.22E-02 | transcription_start_site | - | 239014 | 239014 | -1507 | 6993 AN1119  |
| 835 CONTIG170  | 168167 | 168441 | 2.06 | 2.22E-03 | transcription_start_site | - | 166416 | 166416 | -1888 | 7001 AN11192 |
| 835 CONTIG170  | 168167 | 168441 | 2.06 | 2.22E-03 | transcription_start_site | - | 166182 | 166182 | -2122 | 7002 AN11192 |
| 835 CONTIG170  | 168167 | 168441 | 2.06 | 2.22E-03 | transcription_start_site | - | 165307 | 165307 | -2997 | 7003 AN11192 |
| 835 CONTIG170  | 168167 | 168441 | 2.06 | 2.22E-03 | transcription_start_site | - | 165164 | 165164 | -3140 | 7004 AN11192 |
| 834 CONTIG170  | 35119  | 35768  | 2.06 | 0.00E+00 | transcription_start_site | + | 39976  | 39976  | -4532 | 7010 AN11195 |
| 2830 CONTIG170 | 24842  | 25401  | 1.05 | 1.66E-01 | transcription_start_site | + | 24003  | 24003  | 1118  | 7018 AN11197 |
| 1309 CONTIG16  | 240239 | 240803 | 1.69 | 5.22E-02 | transcription_start_site | - | 240985 | 240985 | 464   | 7024 AN1120  |
| 1309 CONTIG16  | 240239 | 240803 | 1.69 | 5.22E-02 | transcription_start_site | - | 241156 | 241156 | 635   | 7023 AN1120  |
| 835 CONTIG170  | 168167 | 168441 | 2.06 | 2.22E-03 | transcription_start_site | - | 167440 | 167440 | -864  | 7025 AN11200 |
| 835 CONTIG170  | 168167 | 168441 | 2.06 | 2.22E-03 | transcription_start_site | - | 167331 | 167331 | -973  | 7026 AN11200 |
| 1309 CONTIG16  | 240239 | 240803 | 1.69 | 5.22E-02 | transcription_start_site | + | 241511 | 241511 | -990  | 7057 AN1121  |
| 534 CONTIG172  | 427209 | 427493 | 2.39 | 0.00E+00 | transcription_start_site | - | 425129 | 425129 | -2222 | 7073 AN11213 |
| 534 CONTIG172  | 427209 | 427493 | 2.39 | 0.00E+00 | transcription_start_site | - | 424888 | 424888 | -2463 | 7074 AN11213 |
| 2777 CONTIG172 | 428704 | 429133 | 1.08 | 1.08E-01 | transcription_start_site | - | 425129 | 425129 | -3789 | 7073 AN11213 |
| 2777 CONTIG172 | 428704 | 429133 | 1.08 | 1.08E-01 | transcription_start_site | - | 424888 | 424888 | -4030 | 7074 AN11213 |
| 534 CONTIG172  | 427209 | 427493 | 2.39 | 0.00E+00 | transcription_start_site | - | 425775 | 425775 | -1576 | 7078 AN11216 |
| 534 CONTIG172  | 427209 | 427493 | 2.39 | 0.00E+00 | transcription_start_site | - | 425599 | 425599 | -1752 | 7079 AN11216 |
| 2777 CONTIG172 | 428704 | 429133 | 1.08 | 1.08E-01 | transcription_start_site | - | 425775 | 425775 | -3143 | 7078 AN11216 |
| 2777 CONTIG172 | 428704 | 429133 | 1.08 | 1.08E-01 | transcription_start_site | - | 425599 | 425599 | -3319 | 7079 AN11216 |
| 2914 CONTIG174 | 16801  | 17080  | 0.99 | 2.62E-02 | transcription_start_site | - | 17017  | 17017  | 76    | 7110 AN11225 |
| 2914 CONTIG174 | 16801  | 17080  | 0.99 | 2.62E-02 | transcription_start_site | - | 14645  | 14645  | -2295 | 7111 AN11226 |
| 2914 CONTIG174 | 16801  | 17080  | 0.99 | 2.62E-02 | transcription_start_site | - | 14584  | 14584  | -2356 | 7112 AN11226 |
| 2914 CONTIG174 | 16801  | 17080  | 0.99 | 2.62E-02 | transcription_start_site | - | 14445  | 14445  | -2495 | 7113 AN11226 |
| 2914 CONTIG174 | 16801  | 17080  | 0.99 | 2.62E-02 | transcription_start_site | - | 14192  | 14192  | -2748 | 7114 AN11226 |
| 2914 CONTIG174 | 16801  | 17080  | 0.99 | 2.62E-02 | transcription_start_site | - | 13890  | 13890  | -3050 | 7115 AN11226 |
| 2980 CONTIG175 | 15301  | 15803  | 0.93 | 5.22E-02 | transcription_start_site | + | 18281  | 18281  | -2729 | 7116 AN11227 |
| 2980 CONTIG175 | 15301  | 15803  | 0.93 | 5.22E-02 | transcription_start_site | + | 18376  | 18376  | -2824 | 7117 AN11227 |
| 2980 CONTIG175 | 15301  | 15803  | 0.93 | 5.22E-02 | transcription_start_site | + | 18479  | 18479  | -2927 | 7118 AN11227 |
| 2980 CONTIG175 | 15301  | 15803  | 0.93 | 5.22E-02 | transcription_start_site | + | 18655  | 18655  | -3103 | 7119 AN11227 |
| 2980 CONTIG175 | 15301  | 15803  | 0.93 | 5.22E-02 | transcription_start_site | + | 18873  | 18873  | -3321 | 7120 AN11227 |
| 2980 CONTIG175 | 15301  | 15803  | 0.93 | 5.22E-02 | transcription_start_site | + | 19169  | 19169  | -3617 | 7121 AN11227 |
| 2980 CONTIG175 | 15301  | 15803  | 0.93 | 5.22E-02 | transcription_start_site | + | 19292  | 19292  | -3740 | 7122 AN11227 |
| 3063 CONTIG175 | 17706  | 18140  | 0.68 | 1.93E-01 | transcription_start_site | + | 18281  | 18281  | -358  | 7116 AN11227 |

|      |           |        |        |      |          |                          |   |        |        |       |      |         |
|------|-----------|--------|--------|------|----------|--------------------------|---|--------|--------|-------|------|---------|
| 3063 | CONTIG175 | 17706  | 18140  | 0.68 | 1.93E-01 | transcription_start_site | + | 18376  | 18376  | -453  | 7117 | AN11227 |
| 3063 | CONTIG175 | 17706  | 18140  | 0.68 | 1.93E-01 | transcription_start_site | + | 18479  | 18479  | -556  | 7118 | AN11227 |
| 3063 | CONTIG175 | 17706  | 18140  | 0.68 | 1.93E-01 | transcription_start_site | + | 18655  | 18655  | -732  | 7119 | AN11227 |
| 3063 | CONTIG175 | 17706  | 18140  | 0.68 | 1.93E-01 | transcription_start_site | + | 18873  | 18873  | -950  | 7120 | AN11227 |
| 3063 | CONTIG175 | 17706  | 18140  | 0.68 | 1.93E-01 | transcription_start_site | + | 19169  | 19169  | -1246 | 7121 | AN11227 |
| 3063 | CONTIG175 | 17706  | 18140  | 0.68 | 1.93E-01 | transcription_start_site | + | 19292  | 19292  | -1369 | 7122 | AN11227 |
| 1027 | CONTIG16  | 249842 | 250104 | 1.89 | 2.62E-02 | transcription_start_site | - | 246356 | 246356 | -3617 | 7131 | AN1123  |
| 1027 | CONTIG16  | 249842 | 250104 | 1.89 | 2.62E-02 | transcription_start_site | - | 246268 | 246268 | -3705 | 7132 | AN1123  |
| 1027 | CONTIG16  | 249842 | 250104 | 1.89 | 2.62E-02 | transcription_start_site | - | 246099 | 246099 | -3874 | 7133 | AN1123  |
| 1027 | CONTIG16  | 249842 | 250104 | 1.89 | 2.62E-02 | transcription_start_site | - | 245962 | 245962 | -4011 | 7134 | AN1123  |
| 1027 | CONTIG16  | 249842 | 250104 | 1.89 | 2.62E-02 | transcription_start_site | - | 245481 | 245481 | -4492 | 7135 | AN1123  |
| 1027 | CONTIG16  | 249842 | 250104 | 1.89 | 2.62E-02 | transcription_start_site | - | 245304 | 245304 | -4669 | 7136 | AN1123  |
| 3069 | CONTIG179 | 3156   | 3445   | 0.63 | 9.24E-02 | transcription_start_site | + | 4047   | 4047   | -746  | 7137 | AN11230 |
| 3069 | CONTIG179 | 3156   | 3445   | 0.63 | 9.24E-02 | transcription_start_site | + | 4188   | 4188   | -887  | 7138 | AN11230 |
| 3069 | CONTIG179 | 3156   | 3445   | 0.63 | 9.24E-02 | transcription_start_site | + | 2586   | 2586   | 714   | 7143 | AN11231 |
| 3069 | CONTIG179 | 3156   | 3445   | 0.63 | 9.24E-02 | transcription_start_site | + | 2343   | 2343   | 957   | 7142 | AN11231 |
| 3045 | CONTIG183 | 5926   | 6220   | 0.77 | 9.24E-02 | transcription_start_site | + | 6012   | 6012   | 61    | 7144 | AN11232 |
| 3045 | CONTIG183 | 5926   | 6220   | 0.77 | 9.24E-02 | transcription_start_site | + | 6449   | 6449   | -376  | 7145 | AN11232 |
| 3041 | CONTIG183 | 9246   | 9742   | 0.79 | 8.01E-02 | transcription_start_site | + | 9301   | 9301   | 193   | 7148 | AN11233 |
| 3041 | CONTIG183 | 9246   | 9742   | 0.79 | 8.01E-02 | transcription_start_site | + | 9793   | 9793   | -299  | 7149 | AN11233 |
| 3041 | CONTIG183 | 9246   | 9742   | 0.79 | 8.01E-02 | transcription_start_site | + | 9925   | 9925   | -431  | 7150 | AN11233 |
| 3041 | CONTIG183 | 9246   | 9742   | 0.79 | 8.01E-02 | transcription_start_site | + | 8353   | 8353   | 1141  | 7147 | AN11233 |
| 3045 | CONTIG183 | 5926   | 6220   | 0.77 | 9.24E-02 | transcription_start_site | + | 8213   | 8213   | -2140 | 7146 | AN11233 |
| 3045 | CONTIG183 | 5926   | 6220   | 0.77 | 9.24E-02 | transcription_start_site | + | 8353   | 8353   | -2280 | 7147 | AN11233 |
| 3045 | CONTIG183 | 5926   | 6220   | 0.77 | 9.24E-02 | transcription_start_site | + | 9301   | 9301   | -3228 | 7148 | AN11233 |
| 3045 | CONTIG183 | 5926   | 6220   | 0.77 | 9.24E-02 | transcription_start_site | + | 9793   | 9793   | -3720 | 7149 | AN11233 |
| 3045 | CONTIG183 | 5926   | 6220   | 0.77 | 9.24E-02 | transcription_start_site | + | 9925   | 9925   | -3852 | 7150 | AN11233 |
| 146  | CONTIG186 | 2026   | 2395   | 3.06 | 2.49E-03 | transcription_start_site | + | 1370   | 1370   | 840   | 7153 | AN11234 |
| 146  | CONTIG186 | 2026   | 2395   | 3.06 | 2.49E-03 | transcription_start_site | + | 1235   | 1235   | 975   | 7152 | AN11234 |
| 146  | CONTIG186 | 2026   | 2395   | 3.06 | 2.49E-03 | transcription_start_site | + | 1167   | 1167   | 1043  | 7151 | AN11234 |
| 1027 | CONTIG16  | 249842 | 250104 | 1.89 | 2.62E-02 | transcription_start_site | + | 249363 | 249363 | 610   | 7166 | AN1124  |
| 1027 | CONTIG16  | 249842 | 250104 | 1.89 | 2.62E-02 | transcription_start_site | + | 249198 | 249198 | 775   | 7165 | AN1124  |
| 2343 | CONTIG197 | 466    | 1125   | 1.25 | 3.08E-02 | transcription_start_site | + | 1083   | 1083   | -287  | 7167 | AN11240 |
| 2343 | CONTIG197 | 466    | 1125   | 1.25 | 3.08E-02 | transcription_start_site | + | 6043   | 6043   | -5247 | 7169 | AN11242 |
| 1804 | CONTIG199 | 1436   | 1795   | 1.45 | 1.30E-02 | transcription_start_site | + | 4536   | 4536   | -2920 | 7171 | AN11243 |
| 1804 | CONTIG199 | 1436   | 1795   | 1.45 | 1.30E-02 | transcription_start_site | + | 4842   | 4842   | -3226 | 7172 | AN11243 |
| 3064 | CONTIG204 | 6016   | 6350   | 0.66 | 1.50E-01 | transcription_start_site | - | 3998   | 3998   | -2185 | 7173 | AN11244 |
| 3064 | CONTIG204 | 6016   | 6350   | 0.66 | 1.50E-01 | transcription_start_site | - | 3865   | 3865   | -2318 | 7174 | AN11244 |
| 3064 | CONTIG204 | 6016   | 6350   | 0.66 | 1.50E-01 | transcription_start_site | - | 3726   | 3726   | -2457 | 7175 | AN11244 |
| 3064 | CONTIG204 | 6016   | 6350   | 0.66 | 1.50E-01 | transcription_start_site | - | 3093   | 3093   | -3090 | 7176 | AN11244 |
| 3064 | CONTIG204 | 6016   | 6350   | 0.66 | 1.50E-01 | transcription_start_site | - | 5757   | 5757   | -426  | 7177 | AN11245 |
| 3064 | CONTIG204 | 6016   | 6350   | 0.66 | 1.50E-01 | transcription_start_site | - | 5315   | 5315   | -868  | 7178 | AN11245 |
| 2153 | CONTIG209 | 2121   | 3125   | 1.31 | 1.17E-03 | transcription_start_site | + | 4689   | 4689   | -2066 | 7179 | AN11246 |
| 3026 | CONTIG209 | 4969   | 5696   | 0.86 | 9.26E-02 | transcription_start_site | + | 4689   | 4689   | 643   | 7179 | AN11246 |
| 3047 | CONTIG209 | 3619   | 4558   | 0.77 | 1.59E-01 | transcription_start_site | + | 4689   | 4689   | -600  | 7179 | AN11246 |
| 2518 | CONTIG221 | 3166   | 3516   | 1.2  | 1.93E-01 | transcription_start_site | + | 2842   | 2842   | 499   | 7182 | AN11248 |
| 2518 | CONTIG221 | 3166   | 3516   | 1.2  | 1.93E-01 | transcription_start_site | + | 2689   | 2689   | 652   | 7181 | AN11248 |
| 2518 | CONTIG221 | 3166   | 3516   | 1.2  | 1.93E-01 | transcription_start_site | + | 2463   | 2463   | 878   | 7180 | AN11248 |
| 1027 | CONTIG16  | 249842 | 250104 | 1.89 | 2.62E-02 | transcription_start_site | - | 249896 | 249896 | -77   | 7184 | AN1125  |
| 1027 | CONTIG16  | 249842 | 250104 | 1.89 | 2.62E-02 | transcription_start_site | - | 250113 | 250113 | 140   | 7183 | AN1125  |
| 1162 | CONTIG16  | 252455 | 252814 | 1.79 | 3.70E-02 | transcription_start_site | - | 250113 | 250113 | -2521 | 7183 | AN1125  |
| 1162 | CONTIG16  | 252455 | 252814 | 1.79 | 3.70E-02 | transcription_start_site | - | 249896 | 249896 | -2738 | 7184 | AN1125  |
| 1580 | CONTIG84  | 112505 | 112940 | 1.55 | 9.24E-02 | transcription_start_site | + | 114997 | 114997 | -2274 | 7190 | AN11253 |
| 1580 | CONTIG84  | 112505 | 112940 | 1.55 | 9.24E-02 | transcription_start_site | + | 115900 | 115900 | -3177 | 7191 | AN11253 |
| 1286 | CONTIG2   | 75677  | 76037  | 1.7  | 5.20E-03 | transcription_start_site | - | 76104  | 76104  | 247   | 7202 | AN11259 |
| 1286 | CONTIG2   | 75677  | 76037  | 1.7  | 5.20E-03 | transcription_start_site | - | 76160  | 76160  | 303   | 7201 | AN11259 |
| 2068 | CONTIG2   | 74717  | 75291  | 1.34 | 3.08E-02 | transcription_start_site | - | 76104  | 76104  | 1100  | 7202 | AN11259 |



|      |          |        |        |      |          |                          |   |        |        |       |      |         |
|------|----------|--------|--------|------|----------|--------------------------|---|--------|--------|-------|------|---------|
| 2068 | CONTIG2  | 74717  | 75291  | 1.34 | 3.08E-02 | transcription_start_site | - | 76160  | 76160  | 1156  | 7201 | AN11259 |
| 1027 | CONTIG16 | 249842 | 250104 | 1.89 | 2.62E-02 | transcription_start_site | + | 250643 | 250643 | -670  | 7203 | AN1126  |
| 1027 | CONTIG16 | 249842 | 250104 | 1.89 | 2.62E-02 | transcription_start_site | + | 250900 | 250900 | -927  | 7204 | AN1126  |
| 1027 | CONTIG16 | 249842 | 250104 | 1.89 | 2.62E-02 | transcription_start_site | + | 251201 | 251201 | -1228 | 7205 | AN1126  |
| 1027 | CONTIG16 | 249842 | 250104 | 1.89 | 2.62E-02 | transcription_start_site | + | 251319 | 251319 | -1346 | 7206 | AN1126  |
| 1815 | CONTIG5  | 46958  | 47458  | 1.45 | 1.66E-01 | transcription_start_site | - | 44475  | 44475  | -2733 | 7207 | AN11260 |
| 1815 | CONTIG5  | 46958  | 47458  | 1.45 | 1.66E-01 | transcription_start_site | - | 44249  | 44249  | -2959 | 7208 | AN11260 |
| 1967 | CONTIG5  | 67507  | 68076  | 1.39 | 1.93E-01 | transcription_start_site | + | 69123  | 69123  | -1331 | 7209 | AN11261 |
| 1967 | CONTIG5  | 67507  | 68076  | 1.39 | 1.93E-01 | transcription_start_site | + | 69287  | 69287  | -1495 | 7210 | AN11261 |
| 581  | CONTIG5  | 102237 | 102741 | 2.34 | 1.30E-02 | transcription_start_site | + | 102547 | 102547 | -58   | 7212 | AN11262 |
| 581  | CONTIG5  | 102237 | 102741 | 2.34 | 1.30E-02 | transcription_start_site | + | 102294 | 102294 | 195   | 7211 | AN11262 |
| 581  | CONTIG5  | 102237 | 102741 | 2.34 | 1.30E-02 | transcription_start_site | + | 102792 | 102792 | -303  | 7213 | AN11262 |
| 986  | CONTIG6  | 32254  | 32528  | 1.92 | 7.85E-03 | transcription_start_site | - | 32398  | 32398  | 7     | 7222 | AN11266 |
| 986  | CONTIG6  | 32254  | 32528  | 1.92 | 7.85E-03 | transcription_start_site | - | 32758  | 32758  | 367   | 7221 | AN11266 |
| 176  | CONTIG6  | 87761  | 88408  | 2.99 | 0.00E+00 | transcription_start_site | + | 92873  | 92873  | -4788 | 7223 | AN11267 |
| 176  | CONTIG6  | 87761  | 88408  | 2.99 | 0.00E+00 | transcription_start_site | + | 93145  | 93145  | -5060 | 7224 | AN11267 |
| 1162 | CONTIG16 | 252455 | 252814 | 1.79 | 3.70E-02 | transcription_start_site | - | 252862 | 252862 | 227   | 7232 | AN1127  |
| 1162 | CONTIG16 | 252455 | 252814 | 1.79 | 3.70E-02 | transcription_start_site | - | 252932 | 252932 | 297   | 7231 | AN1127  |
| 1731 | CONTIG16 | 257719 | 258133 | 1.49 | 9.24E-02 | transcription_start_site | - | 252932 | 252932 | -4994 | 7231 | AN1127  |
| 1731 | CONTIG16 | 257719 | 258133 | 1.49 | 9.24E-02 | transcription_start_site | - | 252862 | 252862 | -5064 | 7232 | AN1127  |
| 947  | CONTIG7  | 508741 | 509232 | 1.96 | 7.85E-03 | transcription_start_site | + | 513357 | 513357 | -4370 | 7242 | AN11273 |
| 947  | CONTIG7  | 508741 | 509232 | 1.96 | 7.85E-03 | transcription_start_site | + | 513463 | 513463 | -4476 | 7243 | AN11273 |
| 947  | CONTIG7  | 508741 | 509232 | 1.96 | 7.85E-03 | transcription_start_site | + | 513654 | 513654 | -4667 | 7244 | AN11273 |
| 947  | CONTIG7  | 508741 | 509232 | 1.96 | 7.85E-03 | transcription_start_site | + | 514072 | 514072 | -5085 | 7245 | AN11273 |
| 614  | CONTIG10 | 96542  | 97104  | 2.29 | 4.46E-04 | transcription_start_site | + | 96137  | 96137  | 686   | 7262 | AN11279 |
| 614  | CONTIG10 | 96542  | 97104  | 2.29 | 4.46E-04 | transcription_start_site | + | 95789  | 95789  | 1034  | 7261 | AN11279 |
| 1117 | CONTIG10 | 94737  | 95316  | 1.82 | 2.12E-02 | transcription_start_site | + | 95789  | 95789  | -762  | 7261 | AN11279 |
| 1117 | CONTIG10 | 94737  | 95316  | 1.82 | 2.12E-02 | transcription_start_site | + | 96137  | 96137  | -1110 | 7262 | AN11279 |
| 1027 | CONTIG16 | 249842 | 250104 | 1.89 | 2.62E-02 | transcription_start_site | + | 254619 | 254619 | -4646 | 7263 | AN1128  |
| 1162 | CONTIG16 | 252455 | 252814 | 1.79 | 3.70E-02 | transcription_start_site | + | 254619 | 254619 | -1984 | 7263 | AN1128  |
| 1464 | CONTIG12 | 45608  | 45892  | 1.61 | 4.36E-02 | transcription_start_site | + | 50677  | 50677  | -4927 | 7264 | AN11280 |
| 973  | CONTIG14 | 261244 | 261878 | 1.93 | 4.81E-03 | transcription_start_site | - | 257115 | 257115 | -4446 | 7274 | AN11285 |
| 973  | CONTIG14 | 261244 | 261878 | 1.93 | 4.81E-03 | transcription_start_site | - | 256764 | 256764 | -4797 | 7275 | AN11285 |
| 973  | CONTIG14 | 261244 | 261878 | 1.93 | 4.81E-03 | transcription_start_site | - | 256634 | 256634 | -4927 | 7276 | AN11285 |
| 616  | CONTIG14 | 344115 | 344397 | 2.29 | 2.22E-03 | transcription_start_site | - | 341574 | 341574 | -2682 | 7277 | AN11286 |
| 616  | CONTIG14 | 344115 | 344397 | 2.29 | 2.22E-03 | transcription_start_site | - | 341468 | 341468 | -2788 | 7278 | AN11286 |
| 2776 | CONTIG15 | 145051 | 146765 | 1.08 | 1.01E-01 | transcription_start_site | - | 141498 | 141498 | -4410 | 7279 | AN11287 |
| 2776 | CONTIG15 | 145051 | 146765 | 1.08 | 1.01E-01 | transcription_start_site | - | 141381 | 141381 | -4527 | 7280 | AN11287 |
| 2776 | CONTIG15 | 145051 | 146765 | 1.08 | 1.01E-01 | transcription_start_site | - | 141122 | 141122 | -4786 | 7281 | AN11287 |
| 522  | CONTIG15 | 154220 | 154494 | 2.41 | 2.16E-04 | transcription_start_site | + | 154905 | 154905 | -548  | 7282 | AN11288 |
| 522  | CONTIG15 | 154220 | 154494 | 2.41 | 2.16E-04 | transcription_start_site | + | 155055 | 155055 | -698  | 7283 | AN11288 |
| 1242 | CONTIG15 | 155570 | 156054 | 1.73 | 1.11E-02 | transcription_start_site | + | 155055 | 155055 | 757   | 7283 | AN11288 |
| 1242 | CONTIG15 | 155570 | 156054 | 1.73 | 1.11E-02 | transcription_start_site | + | 154905 | 154905 | 907   | 7282 | AN11288 |
| 1366 | CONTIG15 | 152195 | 152529 | 1.65 | 1.57E-02 | transcription_start_site | + | 154905 | 154905 | -2543 | 7282 | AN11288 |
| 1366 | CONTIG15 | 152195 | 152529 | 1.65 | 1.57E-02 | transcription_start_site | + | 155055 | 155055 | -2693 | 7283 | AN11288 |
| 1362 | CONTIG15 | 171379 | 172038 | 1.65 | 7.16E-03 | transcription_start_site | - | 169157 | 169157 | -2551 | 7284 | AN11289 |
| 1362 | CONTIG15 | 171379 | 172038 | 1.65 | 7.16E-03 | transcription_start_site | - | 168772 | 168772 | -2936 | 7285 | AN11289 |
| 1731 | CONTIG16 | 257719 | 258133 | 1.49 | 9.24E-02 | transcription_start_site | + | 258104 | 258104 | -178  | 7286 | AN1129  |
| 1731 | CONTIG16 | 257719 | 258133 | 1.49 | 9.24E-02 | transcription_start_site | + | 258766 | 258766 | -840  | 7287 | AN1129  |
| 1731 | CONTIG16 | 257719 | 258133 | 1.49 | 9.24E-02 | transcription_start_site | + | 258919 | 258919 | -993  | 7288 | AN1129  |
| 1731 | CONTIG16 | 257719 | 258133 | 1.49 | 9.24E-02 | transcription_start_site | + | 259477 | 259477 | -1551 | 7289 | AN1129  |
| 1731 | CONTIG16 | 257719 | 258133 | 1.49 | 9.24E-02 | transcription_start_site | + | 260013 | 260013 | -2087 | 7290 | AN1129  |
| 32   | CONTIG16 | 24243  | 24657  | 3.53 | 0.00E+00 | transcription_start_site | - | 20986  | 20986  | -3464 | 7292 | AN11291 |
| 32   | CONTIG16 | 24243  | 24657  | 3.53 | 0.00E+00 | transcription_start_site | - | 20869  | 20869  | -3581 | 7293 | AN11291 |
| 379  | CONTIG16 | 22068  | 22477  | 2.63 | 0.00E+00 | transcription_start_site | - | 20986  | 20986  | -1286 | 7292 | AN11291 |
| 379  | CONTIG16 | 22068  | 22477  | 2.63 | 0.00E+00 | transcription_start_site | - | 20869  | 20869  | -1403 | 7293 | AN11291 |
| 415  | CONTIG16 | 179121 | 179455 | 2.58 | 0.00E+00 | transcription_start_site | - | 175282 | 175282 | -4006 | 7301 | AN11294 |

|      |          |        |        |      |          |                          |   |        |        |       |      |         |
|------|----------|--------|--------|------|----------|--------------------------|---|--------|--------|-------|------|---------|
| 415  | CONTIG16 | 179121 | 179455 | 2.58 | 0.00E+00 | transcription_start_site | - | 175194 | 175194 | -4094 | 7302 | AN11294 |
| 711  | CONTIG16 | 193816 | 194160 | 2.19 | 8.81E-03 | transcription_start_site | - | 194590 | 194590 | 602   | 7304 | AN11295 |
| 711  | CONTIG16 | 193816 | 194160 | 2.19 | 8.81E-03 | transcription_start_site | - | 194728 | 194728 | 740   | 7303 | AN11295 |
| 1731 | CONTIG16 | 257719 | 258133 | 1.49 | 9.24E-02 | transcription_start_site | + | 262554 | 262554 | -4628 | 7316 | AN1130  |
| 1731 | CONTIG16 | 257719 | 258133 | 1.49 | 9.24E-02 | transcription_start_site | + | 263055 | 263055 | -5129 | 7317 | AN1130  |
| 283  | CONTIG22 | 40145  | 40644  | 2.79 | 0.00E+00 | transcription_start_site | + | 42564  | 42564  | -2169 | 7323 | AN11301 |
| 283  | CONTIG22 | 40145  | 40644  | 2.79 | 0.00E+00 | transcription_start_site | + | 43022  | 43022  | -2627 | 7324 | AN11301 |
| 1061 | CONTIG22 | 42835  | 43123  | 1.86 | 2.62E-02 | transcription_start_site | + | 43022  | 43022  | -43   | 7324 | AN11301 |
| 1061 | CONTIG22 | 42835  | 43123  | 1.86 | 2.62E-02 | transcription_start_site | + | 42564  | 42564  | 415   | 7323 | AN11301 |
| 1168 | CONTIG25 | 8866   | 9125   | 1.78 | 6.61E-03 | transcription_start_site | - | 4199   | 4199   | -4796 | 7335 | AN11305 |
| 1168 | CONTIG25 | 8866   | 9125   | 1.78 | 6.61E-03 | transcription_start_site | - | 4100   | 4100   | -4895 | 7336 | AN11305 |
| 1168 | CONTIG25 | 8866   | 9125   | 1.78 | 6.61E-03 | transcription_start_site | - | 3905   | 3905   | -5090 | 7337 | AN11305 |
| 2825 | CONTIG25 | 35180  | 35619  | 1.05 | 1.44E-01 | transcription_start_site | + | 37210  | 37210  | -1810 | 7338 | AN11306 |
| 2825 | CONTIG25 | 35180  | 35619  | 1.05 | 1.44E-01 | transcription_start_site | + | 37289  | 37289  | -1889 | 7339 | AN11306 |
| 2827 | CONTIG25 | 106744 | 107153 | 1.05 | 1.44E-01 | transcription_start_site | - | 106744 | 106744 | -204  | 7340 | AN11307 |
| 2827 | CONTIG25 | 106744 | 107153 | 1.05 | 1.44E-01 | transcription_start_site | - | 106665 | 106665 | -283  | 7341 | AN11307 |
| 2601 | CONTIG25 | 137779 | 139263 | 1.16 | 7.51E-02 | transcription_start_site | - | 135300 | 135300 | -3221 | 7342 | AN11308 |
| 2601 | CONTIG25 | 137779 | 139263 | 1.16 | 7.51E-02 | transcription_start_site | - | 135029 | 135029 | -3492 | 7343 | AN11308 |
| 2828 | CONTIG25 | 137043 | 137393 | 1.05 | 1.44E-01 | transcription_start_site | - | 135300 | 135300 | -1918 | 7342 | AN11308 |
| 2828 | CONTIG25 | 137043 | 137393 | 1.05 | 1.44E-01 | transcription_start_site | - | 135029 | 135029 | -2189 | 7343 | AN11308 |
| 547  | CONTIG26 | 181506 | 182014 | 2.39 | 3.61E-03 | transcription_start_site | - | 178398 | 178398 | -3362 | 7352 | AN11311 |
| 547  | CONTIG26 | 181506 | 182014 | 2.39 | 3.61E-03 | transcription_start_site | - | 178017 | 178017 | -3743 | 7353 | AN11311 |
| 2012 | CONTIG26 | 287188 | 288517 | 1.37 | 1.07E-01 | transcription_start_site | + | 290987 | 290987 | -3134 | 7354 | AN11312 |
| 2012 | CONTIG26 | 287188 | 288517 | 1.37 | 1.07E-01 | transcription_start_site | + | 291216 | 291216 | -3363 | 7355 | AN11312 |
| 2012 | CONTIG26 | 287188 | 288517 | 1.37 | 1.07E-01 | transcription_start_site | + | 291344 | 291344 | -3491 | 7356 | AN11312 |
| 2301 | CONTIG26 | 286218 | 286567 | 1.27 | 1.66E-01 | transcription_start_site | + | 290987 | 290987 | -4594 | 7354 | AN11312 |
| 2301 | CONTIG26 | 286218 | 286567 | 1.27 | 1.66E-01 | transcription_start_site | + | 291216 | 291216 | -4823 | 7355 | AN11312 |
| 2301 | CONTIG26 | 286218 | 286567 | 1.27 | 1.66E-01 | transcription_start_site | + | 291344 | 291344 | -4951 | 7356 | AN11312 |
| 2318 | CONTIG27 | 40587  | 40944  | 1.26 | 6.84E-02 | transcription_start_site | + | 45087  | 45087  | -4321 | 7357 | AN11313 |
| 2318 | CONTIG27 | 40587  | 40944  | 1.26 | 6.84E-02 | transcription_start_site | + | 45525  | 45525  | -4759 | 7358 | AN11313 |
| 2432 | CONTIG27 | 42842  | 44089  | 1.22 | 5.52E-02 | transcription_start_site | + | 45087  | 45087  | -1621 | 7357 | AN11313 |
| 2432 | CONTIG27 | 42842  | 44089  | 1.22 | 5.52E-02 | transcription_start_site | + | 45525  | 45525  | -2059 | 7358 | AN11313 |
| 2948 | CONTIG28 | 24613  | 25252  | 0.97 | 1.28E-01 | transcription_start_site | + | 24786  | 24786  | 146   | 7361 | AN11314 |
| 2948 | CONTIG28 | 24613  | 25252  | 0.97 | 1.28E-01 | transcription_start_site | + | 24549  | 24549  | 383   | 7360 | AN11314 |
| 2948 | CONTIG28 | 24613  | 25252  | 0.97 | 1.28E-01 | transcription_start_site | + | 24404  | 24404  | 528   | 7359 | AN11314 |
| 515  | CONTIG29 | 113118 | 113470 | 2.43 | 3.61E-03 | transcription_start_site | + | 114345 | 114345 | -1051 | 7365 | AN11316 |
| 515  | CONTIG29 | 113118 | 113470 | 2.43 | 3.61E-03 | transcription_start_site | + | 114546 | 114546 | -1252 | 7366 | AN11316 |
| 515  | CONTIG29 | 113118 | 113470 | 2.43 | 3.61E-03 | transcription_start_site | + | 114737 | 114737 | -1443 | 7367 | AN11316 |
| 1045 | CONTIG29 | 257637 | 258064 | 1.88 | 1.44E-02 | transcription_start_site | - | 252834 | 252834 | -5016 | 7375 | AN11319 |
| 1045 | CONTIG29 | 257637 | 258064 | 1.88 | 1.44E-02 | transcription_start_site | - | 252654 | 252654 | -5196 | 7376 | AN11319 |
| 444  | CONTIG16 | 274430 | 274794 | 2.53 | 2.22E-03 | transcription_start_site | - | 271508 | 271508 | -3104 | 7378 | AN1132  |
| 205  | CONTIG30 | 60076  | 60378  | 2.93 | 0.00E+00 | transcription_start_site | + | 60730  | 60730  | -503  | 7381 | AN11321 |
| 205  | CONTIG30 | 60076  | 60378  | 2.93 | 0.00E+00 | transcription_start_site | + | 60836  | 60836  | -609  | 7382 | AN11321 |
| 205  | CONTIG30 | 60076  | 60378  | 2.93 | 0.00E+00 | transcription_start_site | + | 61014  | 61014  | -787  | 7383 | AN11321 |
| 205  | CONTIG30 | 60076  | 60378  | 2.93 | 0.00E+00 | transcription_start_site | + | 61241  | 61241  | -1014 | 7384 | AN11321 |
| 510  | CONTIG32 | 122258 | 122602 | 2.43 | 2.22E-03 | transcription_start_site | - | 121332 | 121332 | -1098 | 7389 | AN11323 |
| 510  | CONTIG32 | 122258 | 122602 | 2.43 | 2.22E-03 | transcription_start_site | - | 121215 | 121215 | -1215 | 7390 | AN11323 |
| 484  | CONTIG32 | 209046 | 210430 | 2.47 | 1.80E-03 | transcription_start_site | - | 210485 | 210485 | 747   | 7393 | AN11324 |
| 484  | CONTIG32 | 209046 | 210430 | 2.47 | 1.80E-03 | transcription_start_site | - | 210742 | 210742 | 1004  | 7392 | AN11324 |
| 484  | CONTIG32 | 209046 | 210430 | 2.47 | 1.80E-03 | transcription_start_site | - | 211007 | 211007 | 1269  | 7391 | AN11324 |
| 192  | CONTIG32 | 270096 | 270650 | 2.95 | 0.00E+00 | transcription_start_site | - | 269346 | 269346 | -1027 | 7394 | AN11325 |
| 192  | CONTIG32 | 270096 | 270650 | 2.95 | 0.00E+00 | transcription_start_site | - | 269261 | 269261 | -1112 | 7395 | AN11325 |
| 305  | CONTIG32 | 269045 | 269320 | 2.76 | 5.64E-04 | transcription_start_site | - | 269261 | 269261 | 78    | 7395 | AN11325 |
| 305  | CONTIG32 | 269045 | 269320 | 2.76 | 5.64E-04 | transcription_start_site | - | 269346 | 269346 | 163   | 7394 | AN11325 |
| 621  | CONTIG32 | 431638 | 431977 | 2.28 | 1.22E-03 | transcription_start_site | - | 429012 | 429012 | -2795 | 7400 | AN11328 |
| 621  | CONTIG32 | 431638 | 431977 | 2.28 | 1.22E-03 | transcription_start_site | - | 428861 | 428861 | -2946 | 7401 | AN11328 |
| 444  | CONTIG16 | 274430 | 274794 | 2.53 | 2.22E-03 | transcription_start_site | + | 273602 | 273602 | 1010  | 7406 | AN1133  |

|               |         |         |      |          |                          |   |         |         |       |              |
|---------------|---------|---------|------|----------|--------------------------|---|---------|---------|-------|--------------|
| 444 CONTIG16  | 274430  | 274794  | 2.53 | 2.22E-03 | transcription_start_site | + | 273472  | 273472  | 1140  | 7405 AN1133  |
| 1324 CONTIG38 | 194491  | 194755  | 1.67 | 8.81E-03 | transcription_start_site | - | 190795  | 190795  | -3828 | 7416 AN11333 |
| 1324 CONTIG38 | 194491  | 194755  | 1.67 | 8.81E-03 | transcription_start_site | - | 190512  | 190512  | -4111 | 7417 AN11333 |
| 2422 CONTIG39 | 137556  | 137830  | 1.23 | 1.93E-01 | transcription_start_site | - | 134394  | 134394  | -3299 | 7422 AN11336 |
| 2422 CONTIG39 | 137556  | 137830  | 1.23 | 1.93E-01 | transcription_start_site | - | 134186  | 134186  | -3507 | 7423 AN11336 |
| 1407 CONTIG39 | 177078  | 177442  | 1.63 | 5.88E-02 | transcription_start_site | - | 177067  | 177067  | -193  | 7424 AN11337 |
| 1407 CONTIG39 | 177078  | 177442  | 1.63 | 5.88E-02 | transcription_start_site | - | 176957  | 176957  | -303  | 7425 AN11337 |
| 444 CONTIG16  | 274430  | 274794  | 2.53 | 2.22E-03 | transcription_start_site | + | 275399  | 275399  | -787  | 7431 AN1134  |
| 735 CONTIG40  | 133741  | 134005  | 2.17 | 1.57E-02 | transcription_start_site | + | 135754  | 135754  | -1881 | 7436 AN11342 |
| 735 CONTIG40  | 133741  | 134005  | 2.17 | 1.57E-02 | transcription_start_site | + | 135791  | 135791  | -1918 | 7437 AN11342 |
| 735 CONTIG40  | 133741  | 134005  | 2.17 | 1.57E-02 | transcription_start_site | + | 136158  | 136158  | -2285 | 7438 AN11342 |
| 735 CONTIG40  | 133741  | 134005  | 2.17 | 1.57E-02 | transcription_start_site | + | 136244  | 136244  | -2371 | 7439 AN11342 |
| 295 CONTIG42  | 28803   | 29092   | 2.77 | 1.54E-03 | transcription_start_site | - | 27553   | 27553   | -1394 | 7446 AN11345 |
| 295 CONTIG42  | 28803   | 29092   | 2.77 | 1.54E-03 | transcription_start_site | - | 27510   | 27510   | -1437 | 7447 AN11345 |
| 295 CONTIG42  | 28803   | 29092   | 2.77 | 1.54E-03 | transcription_start_site | - | 28808   | 28808   | -139  | 7448 AN11346 |
| 295 CONTIG42  | 28803   | 29092   | 2.77 | 1.54E-03 | transcription_start_site | - | 28224   | 28224   | -723  | 7449 AN11346 |
| 2004 CONTIG43 | 193426  | 193705  | 1.37 | 6.84E-02 | transcription_start_site | - | 194167  | 194167  | 601   | 7461 AN11350 |
| 2004 CONTIG43 | 193426  | 193705  | 1.37 | 6.84E-02 | transcription_start_site | - | 194251  | 194251  | 685   | 7460 AN11350 |
| 2838 CONTIG44 | 3096    | 3425    | 1.04 | 4.36E-02 | transcription_start_site | + | 6024    | 6024    | -2763 | 7467 AN11353 |
| 2838 CONTIG44 | 3096    | 3425    | 1.04 | 4.36E-02 | transcription_start_site | + | 6158    | 6158    | -2897 | 7468 AN11353 |
| 3044 CONTIG45 | 51164   | 51428   | 0.78 | 1.66E-01 | transcription_start_site | - | 49454   | 49454   | -1842 | 7471 AN11355 |
| 3044 CONTIG45 | 51164   | 51428   | 0.78 | 1.66E-01 | transcription_start_site | - | 49374   | 49374   | -1922 | 7472 AN11355 |
| 3044 CONTIG45 | 51164   | 51428   | 0.78 | 1.66E-01 | transcription_start_site | - | 49308   | 49308   | -1988 | 7473 AN11355 |
| 3044 CONTIG45 | 51164   | 51428   | 0.78 | 1.66E-01 | transcription_start_site | - | 49208   | 49208   | -2088 | 7474 AN11355 |
| 3044 CONTIG45 | 51164   | 51428   | 0.78 | 1.66E-01 | transcription_start_site | - | 49094   | 49094   | -2202 | 7475 AN11355 |
| 3044 CONTIG45 | 51164   | 51428   | 0.78 | 1.66E-01 | transcription_start_site | - | 48907   | 48907   | -2389 | 7476 AN11355 |
| 444 CONTIG16  | 274430  | 274794  | 2.53 | 2.22E-03 | transcription_start_site | + | 279106  | 279106  | -4494 | 7489 AN1136  |
| 444 CONTIG16  | 274430  | 274794  | 2.53 | 2.22E-03 | transcription_start_site | + | 279332  | 279332  | -4720 | 7490 AN1136  |
| 444 CONTIG16  | 274430  | 274794  | 2.53 | 2.22E-03 | transcription_start_site | + | 279523  | 279523  | -4911 | 7491 AN1136  |
| 2780 CONTIG49 | 70518   | 70927   | 1.08 | 1.44E-01 | transcription_start_site | - | 71420   | 71420   | 697   | 7499 AN11362 |
| 2780 CONTIG49 | 70518   | 70927   | 1.08 | 1.44E-01 | transcription_start_site | - | 71614   | 71614   | 891   | 7498 AN11362 |
| 1481 CONTIG50 | 18152   | 18431   | 1.6  | 8.01E-02 | transcription_start_site | - | 14790   | 14790   | -3501 | 7512 AN11367 |
| 1481 CONTIG50 | 18152   | 18431   | 1.6  | 8.01E-02 | transcription_start_site | - | 14649   | 14649   | -3642 | 7513 AN11367 |
| 107 CONTIG50  | 34138   | 34487   | 3.2  | 2.67E-04 | transcription_start_site | - | 30852   | 30852   | -3460 | 7514 AN11368 |
| 107 CONTIG50  | 34138   | 34487   | 3.2  | 2.67E-04 | transcription_start_site | - | 30220   | 30220   | -4092 | 7515 AN11368 |
| 1207 CONTIG50 | 30838   | 31102   | 1.76 | 5.22E-02 | transcription_start_site | - | 30852   | 30852   | -118  | 7514 AN11368 |
| 1207 CONTIG50 | 30838   | 31102   | 1.76 | 5.22E-02 | transcription_start_site | - | 30220   | 30220   | -750  | 7515 AN11368 |
| 179 CONTIG51  | 275571  | 275843  | 2.99 | 2.39E-04 | transcription_start_site | + | 280645  | 280645  | -4938 | 7528 AN11373 |
| 179 CONTIG51  | 275571  | 275843  | 2.99 | 2.39E-04 | transcription_start_site | + | 280815  | 280815  | -5108 | 7529 AN11373 |
| 790 CONTIG51  | 276770  | 277259  | 2.11 | 4.81E-03 | transcription_start_site | + | 280645  | 280645  | -3630 | 7528 AN11373 |
| 790 CONTIG51  | 276770  | 277259  | 2.11 | 4.81E-03 | transcription_start_site | + | 280815  | 280815  | -3800 | 7529 AN11373 |
| 790 CONTIG51  | 276770  | 277259  | 2.11 | 4.81E-03 | transcription_start_site | + | 280986  | 280986  | -3971 | 7530 AN11373 |
| 1260 CONTIG51 | 1004630 | 1005589 | 1.72 | 4.36E-02 | transcription_start_site | + | 1007731 | 1007731 | -2621 | 7535 AN11376 |
| 830 CONTIG53  | 47851   | 49045   | 2.07 | 1.06E-02 | transcription_start_site | - | 43874   | 43874   | -4574 | 7539 AN11378 |
| 830 CONTIG53  | 47851   | 49045   | 2.07 | 1.06E-02 | transcription_start_site | - | 43751   | 43751   | -4697 | 7540 AN11378 |
| 830 CONTIG53  | 47851   | 49045   | 2.07 | 1.06E-02 | transcription_start_site | - | 43543   | 43543   | -4905 | 7541 AN11378 |
| 1497 CONTIG53 | 44851   | 45740   | 1.59 | 7.25E-02 | transcription_start_site | - | 43874   | 43874   | -1421 | 7539 AN11378 |
| 1497 CONTIG53 | 44851   | 45740   | 1.59 | 7.25E-02 | transcription_start_site | - | 43751   | 43751   | -1544 | 7540 AN11378 |
| 1497 CONTIG53 | 44851   | 45740   | 1.59 | 7.25E-02 | transcription_start_site | - | 43543   | 43543   | -1752 | 7541 AN11378 |
| 1499 CONTIG53 | 44251   | 44535   | 1.59 | 9.24E-02 | transcription_start_site | - | 43874   | 43874   | -519  | 7539 AN11378 |
| 1499 CONTIG53 | 44251   | 44535   | 1.59 | 9.24E-02 | transcription_start_site | - | 43751   | 43751   | -642  | 7540 AN11378 |
| 1499 CONTIG53 | 44251   | 44535   | 1.59 | 9.24E-02 | transcription_start_site | - | 43543   | 43543   | -850  | 7541 AN11378 |
| 2941 CONTIG55 | 137327  | 137616  | 0.98 | 1.66E-01 | transcription_start_site | - | 138547  | 138547  | 1075  | 7559 AN11384 |
| 2941 CONTIG55 | 137327  | 137616  | 0.98 | 1.66E-01 | transcription_start_site | + | 140545  | 140545  | -3073 | 7560 AN11385 |
| 2939 CONTIG55 | 189546  | 190475  | 0.98 | 1.50E-01 | transcription_start_site | + | 194928  | 194928  | -4917 | 7568 AN11388 |
| 2939 CONTIG55 | 189546  | 190475  | 0.98 | 1.50E-01 | transcription_start_site | + | 195118  | 195118  | -5107 | 7569 AN11388 |
| 2939 CONTIG55 | 189546  | 190475  | 0.98 | 1.50E-01 | transcription_start_site | + | 195383  | 195383  | -5372 | 7570 AN11388 |

|      |          |        |        |      |          |                          |   |        |        |       |      |         |
|------|----------|--------|--------|------|----------|--------------------------|---|--------|--------|-------|------|---------|
| 2656 | CONTIG55 | 204690 | 205051 | 1.14 | 9.24E-02 | transcription_start_site | - | 200676 | 200676 | -4194 | 7571 | AN11389 |
| 2656 | CONTIG55 | 204690 | 205051 | 1.14 | 9.24E-02 | transcription_start_site | - | 200479 | 200479 | -4391 | 7572 | AN11389 |
| 2656 | CONTIG55 | 204690 | 205051 | 1.14 | 9.24E-02 | transcription_start_site | - | 199980 | 199980 | -4890 | 7573 | AN11389 |
| 864  | CONTIG16 | 288844 | 289108 | 2.04 | 1.57E-02 | transcription_start_site | - | 284878 | 284878 | -4098 | 7574 | AN1139  |
| 535  | CONTIG55 | 291845 | 292265 | 2.39 | 0.00E+00 | transcription_start_site | + | 296900 | 296900 | -4845 | 7577 | AN11391 |
| 535  | CONTIG55 | 291845 | 292265 | 2.39 | 0.00E+00 | transcription_start_site | + | 296955 | 296955 | -4900 | 7578 | AN11391 |
| 1820 | CONTIG55 | 357538 | 357887 | 1.44 | 2.62E-02 | transcription_start_site | - | 354989 | 354989 | -2723 | 7579 | AN11392 |
| 1820 | CONTIG55 | 357538 | 357887 | 1.44 | 2.62E-02 | transcription_start_site | - | 354725 | 354725 | -2987 | 7580 | AN11392 |
| 2772 | CONTIG59 | 170478 | 170829 | 1.08 | 8.01E-02 | transcription_start_site | - | 171096 | 171096 | 442   | 7592 | AN11398 |
| 2772 | CONTIG59 | 170478 | 170829 | 1.08 | 8.01E-02 | transcription_start_site | - | 171442 | 171442 | 788   | 7591 | AN11398 |
| 603  | CONTIG61 | 98853  | 99150  | 2.3  | 2.22E-03 | transcription_start_site | - | 94176  | 94176  | -4825 | 7610 | AN11404 |
| 603  | CONTIG61 | 98853  | 99150  | 2.3  | 2.22E-03 | transcription_start_site | - | 94084  | 94084  | -4917 | 7611 | AN11404 |
| 603  | CONTIG61 | 98853  | 99150  | 2.3  | 2.22E-03 | transcription_start_site | - | 93997  | 93997  | -5004 | 7612 | AN11404 |
| 1330 | CONTIG61 | 438232 | 438594 | 1.67 | 3.08E-02 | transcription_start_site | + | 442639 | 442639 | -4226 | 7623 | AN11409 |
| 1330 | CONTIG61 | 438232 | 438594 | 1.67 | 3.08E-02 | transcription_start_site | + | 442906 | 442906 | -4493 | 7624 | AN11409 |
| 1330 | CONTIG61 | 438232 | 438594 | 1.67 | 3.08E-02 | transcription_start_site | + | 443459 | 443459 | -5046 | 7625 | AN11410 |
| 2446 | CONTIG61 | 512719 | 512978 | 1.22 | 1.44E-01 | transcription_start_site | - | 510375 | 510375 | -2473 | 7629 | AN11411 |
| 2446 | CONTIG61 | 512719 | 512978 | 1.22 | 1.44E-01 | transcription_start_site | - | 510246 | 510246 | -2602 | 7630 | AN11411 |
| 2446 | CONTIG61 | 512719 | 512978 | 1.22 | 1.44E-01 | transcription_start_site | - | 510079 | 510079 | -2769 | 7631 | AN11411 |
| 2446 | CONTIG61 | 512719 | 512978 | 1.22 | 1.44E-01 | transcription_start_site | - | 509966 | 509966 | -2882 | 7632 | AN11411 |
| 2446 | CONTIG61 | 512719 | 512978 | 1.22 | 1.44E-01 | transcription_start_site | - | 509772 | 509772 | -3076 | 7633 | AN11411 |
| 365  | CONTIG61 | 567152 | 567450 | 2.66 | 6.10E-04 | transcription_start_site | - | 567638 | 567638 | 337   | 7635 | AN11412 |
| 365  | CONTIG61 | 567152 | 567450 | 2.66 | 6.10E-04 | transcription_start_site | - | 567797 | 567797 | 496   | 7634 | AN11412 |
| 1075 | CONTIG61 | 732079 | 732353 | 1.85 | 1.57E-02 | transcription_start_site | - | 728856 | 728856 | -3360 | 7639 | AN11414 |
| 1075 | CONTIG61 | 732079 | 732353 | 1.85 | 1.57E-02 | transcription_start_site | - | 728658 | 728658 | -3558 | 7640 | AN11414 |
| 1075 | CONTIG61 | 732079 | 732353 | 1.85 | 1.57E-02 | transcription_start_site | - | 733204 | 733204 | 988   | 7642 | AN11415 |
| 1069 | CONTIG61 | 758032 | 758676 | 1.85 | 3.83E-03 | transcription_start_site | + | 757612 | 757612 | 742   | 7645 | AN11416 |
| 1069 | CONTIG61 | 758032 | 758676 | 1.85 | 3.83E-03 | transcription_start_site | + | 757416 | 757416 | 938   | 7644 | AN11416 |
| 1069 | CONTIG61 | 758032 | 758676 | 1.85 | 3.83E-03 | transcription_start_site | + | 757219 | 757219 | 1135  | 7643 | AN11416 |
| 2447 | CONTIG61 | 756467 | 756811 | 1.22 | 1.44E-01 | transcription_start_site | + | 757219 | 757219 | -580  | 7643 | AN11416 |
| 2447 | CONTIG61 | 756467 | 756811 | 1.22 | 1.44E-01 | transcription_start_site | + | 757416 | 757416 | -777  | 7644 | AN11416 |
| 2447 | CONTIG61 | 756467 | 756811 | 1.22 | 1.44E-01 | transcription_start_site | + | 757612 | 757612 | -973  | 7645 | AN11416 |
| 2441 | CONTIG61 | 785476 | 785900 | 1.22 | 1.28E-01 | transcription_start_site | - | 785810 | 785810 | 122   | 7647 | AN11417 |
| 2441 | CONTIG61 | 785476 | 785900 | 1.22 | 1.28E-01 | transcription_start_site | - | 785901 | 785901 | 213   | 7646 | AN11417 |
| 1068 | CONTIG62 | 31958  | 32532  | 1.85 | 3.61E-03 | transcription_start_site | + | 35466  | 35466  | -3221 | 7648 | AN11418 |
| 1068 | CONTIG62 | 31958  | 32532  | 1.85 | 3.61E-03 | transcription_start_site | + | 35519  | 35519  | -3274 | 7649 | AN11418 |
| 2943 | CONTIG62 | 36226  | 36575  | 0.98 | 1.66E-01 | transcription_start_site | + | 35519  | 35519  | 881   | 7649 | AN11418 |
| 2943 | CONTIG62 | 36226  | 36575  | 0.98 | 1.66E-01 | transcription_start_site | + | 35466  | 35466  | 934   | 7648 | AN11418 |
| 2464 | CONTIG62 | 105376 | 106100 | 1.21 | 4.42E-02 | transcription_start_site | - | 105336 | 105336 | -402  | 7650 | AN11419 |
| 2464 | CONTIG62 | 105376 | 106100 | 1.21 | 4.42E-02 | transcription_start_site | - | 105123 | 105123 | -615  | 7651 | AN11419 |
| 2464 | CONTIG62 | 105376 | 106100 | 1.21 | 4.42E-02 | transcription_start_site | - | 104860 | 104860 | -878  | 7652 | AN11419 |
| 2207 | CONTIG64 | 121213 | 121712 | 1.29 | 1.86E-02 | transcription_start_site | + | 120989 | 120989 | 473   | 7657 | AN11420 |
| 2207 | CONTIG64 | 121213 | 121712 | 1.29 | 1.86E-02 | transcription_start_site | + | 120832 | 120832 | 630   | 7656 | AN11420 |
| 2958 | CONTIG64 | 117537 | 117826 | 0.96 | 1.44E-01 | transcription_start_site | + | 120832 | 120832 | -3150 | 7656 | AN11420 |
| 2958 | CONTIG64 | 117537 | 117826 | 0.96 | 1.44E-01 | transcription_start_site | + | 120989 | 120989 | -3307 | 7657 | AN11420 |
| 2703 | CONTIG65 | 106139 | 106403 | 1.12 | 8.01E-02 | transcription_start_site | - | 103412 | 103412 | -2859 | 7660 | AN11422 |
| 2703 | CONTIG65 | 106139 | 106403 | 1.12 | 8.01E-02 | transcription_start_site | - | 103162 | 103162 | -3109 | 7661 | AN11422 |
| 1490 | CONTIG67 | 103068 | 103492 | 1.59 | 2.18E-02 | transcription_start_site | - | 98784  | 98784  | -4496 | 7674 | AN11427 |
| 1490 | CONTIG67 | 103068 | 103492 | 1.59 | 2.18E-02 | transcription_start_site | - | 98515  | 98515  | -4765 | 7675 | AN11427 |
| 1490 | CONTIG67 | 103068 | 103492 | 1.59 | 2.18E-02 | transcription_start_site | - | 98227  | 98227  | -5053 | 7676 | AN11427 |
| 1491 | CONTIG67 | 112503 | 112852 | 1.59 | 3.70E-02 | transcription_start_site | + | 114508 | 114508 | -1830 | 7680 | AN11428 |
| 1491 | CONTIG67 | 112503 | 112852 | 1.59 | 3.70E-02 | transcription_start_site | + | 114702 | 114702 | -2024 | 7681 | AN11428 |
| 1491 | CONTIG67 | 112503 | 112852 | 1.59 | 3.70E-02 | transcription_start_site | + | 115566 | 115566 | -2888 | 7682 | AN11428 |
| 1491 | CONTIG67 | 112503 | 112852 | 1.59 | 3.70E-02 | transcription_start_site | + | 115671 | 115671 | -2993 | 7683 | AN11428 |
| 1491 | CONTIG67 | 112503 | 112852 | 1.59 | 3.70E-02 | transcription_start_site | + | 115910 | 115910 | -3232 | 7684 | AN11428 |
| 399  | CONTIG68 | 96905  | 97267  | 2.6  | 2.39E-04 | transcription_start_site | - | 93780  | 93780  | -3306 | 7690 | AN11431 |
| 399  | CONTIG68 | 96905  | 97267  | 2.6  | 2.39E-04 | transcription_start_site | - | 93525  | 93525  | -3561 | 7691 | AN11431 |

|      |          |        |        |      |          |                          |   |        |        |       |      |         |
|------|----------|--------|--------|------|----------|--------------------------|---|--------|--------|-------|------|---------|
| 399  | CONTIG68 | 96905  | 97267  | 2.6  | 2.39E-04 | transcription_start_site | - | 93430  | 93430  | -3656 | 7692 | AN11431 |
| 2735 | CONTIG68 | 92933  | 93209  | 1.11 | 1.66E-01 | transcription_start_site | - | 93430  | 93430  | 359   | 7692 | AN11431 |
| 2735 | CONTIG68 | 92933  | 93209  | 1.11 | 1.66E-01 | transcription_start_site | - | 93525  | 93525  | 454   | 7691 | AN11431 |
| 2735 | CONTIG68 | 92933  | 93209  | 1.11 | 1.66E-01 | transcription_start_site | - | 93780  | 93780  | 709   | 7690 | AN11431 |
| 2129 | CONTIG69 | 23645  | 24144  | 1.32 | 5.05E-02 | transcription_start_site | - | 23122  | 23122  | -772  | 7693 | AN11432 |
| 2129 | CONTIG69 | 23645  | 24144  | 1.32 | 5.05E-02 | transcription_start_site | - | 22931  | 22931  | -963  | 7694 | AN11432 |
| 2510 | CONTIG69 | 25295  | 26169  | 1.2  | 9.26E-02 | transcription_start_site | - | 23122  | 23122  | -2610 | 7693 | AN11432 |
| 2510 | CONTIG69 | 25295  | 26169  | 1.2  | 9.26E-02 | transcription_start_site | - | 22931  | 22931  | -2801 | 7694 | AN11432 |
| 1261 | CONTIG75 | 143865 | 144129 | 1.72 | 4.36E-02 | transcription_start_site | - | 139797 | 139797 | -4200 | 7702 | AN11435 |
| 1261 | CONTIG75 | 143865 | 144129 | 1.72 | 4.36E-02 | transcription_start_site | - | 139328 | 139328 | -4669 | 7703 | AN11435 |
| 1261 | CONTIG75 | 143865 | 144129 | 1.72 | 4.36E-02 | transcription_start_site | - | 139131 | 139131 | -4866 | 7704 | AN11435 |
| 1402 | CONTIG75 | 139580 | 139929 | 1.63 | 3.99E-02 | transcription_start_site | - | 139797 | 139797 | 42    | 7702 | AN11435 |
| 1402 | CONTIG75 | 139580 | 139929 | 1.63 | 3.99E-02 | transcription_start_site | - | 139328 | 139328 | -426  | 7703 | AN11435 |
| 1402 | CONTIG75 | 139580 | 139929 | 1.63 | 3.99E-02 | transcription_start_site | - | 139131 | 139131 | -623  | 7704 | AN11435 |
| 1011 | CONTIG76 | 136208 | 136643 | 1.9  | 1.57E-02 | transcription_start_site | - | 135178 | 135178 | -1247 | 7706 | AN11437 |
| 1011 | CONTIG76 | 136208 | 136643 | 1.9  | 1.57E-02 | transcription_start_site | - | 135122 | 135122 | -1303 | 7707 | AN11437 |
| 1011 | CONTIG76 | 136208 | 136643 | 1.9  | 1.57E-02 | transcription_start_site | - | 135034 | 135034 | -1391 | 7708 | AN11437 |
| 1011 | CONTIG76 | 136208 | 136643 | 1.9  | 1.57E-02 | transcription_start_site | - | 135003 | 135003 | -1422 | 7709 | AN11437 |
| 1072 | CONTIG76 | 134185 | 135442 | 1.85 | 1.00E-02 | transcription_start_site | - | 135003 | 135003 | 189   | 7709 | AN11437 |
| 1072 | CONTIG76 | 134185 | 135442 | 1.85 | 1.00E-02 | transcription_start_site | - | 135034 | 135034 | 220   | 7708 | AN11437 |
| 1072 | CONTIG76 | 134185 | 135442 | 1.85 | 1.00E-02 | transcription_start_site | - | 135122 | 135122 | 308   | 7707 | AN11437 |
| 1072 | CONTIG76 | 134185 | 135442 | 1.85 | 1.00E-02 | transcription_start_site | - | 135178 | 135178 | 364   | 7706 | AN11437 |
| 1952 | CONTIG76 | 135463 | 136117 | 1.39 | 9.24E-02 | transcription_start_site | - | 135178 | 135178 | -612  | 7706 | AN11437 |
| 1952 | CONTIG76 | 135463 | 136117 | 1.39 | 9.24E-02 | transcription_start_site | - | 135122 | 135122 | -668  | 7707 | AN11437 |
| 1952 | CONTIG76 | 135463 | 136117 | 1.39 | 9.24E-02 | transcription_start_site | - | 135034 | 135034 | -756  | 7708 | AN11437 |
| 1952 | CONTIG76 | 135463 | 136117 | 1.39 | 9.24E-02 | transcription_start_site | - | 135003 | 135003 | -787  | 7709 | AN11437 |
| 2084 | CONTIG76 | 137859 | 138138 | 1.34 | 1.08E-01 | transcription_start_site | - | 135178 | 135178 | -2820 | 7706 | AN11437 |
| 2084 | CONTIG76 | 137859 | 138138 | 1.34 | 1.08E-01 | transcription_start_site | - | 135122 | 135122 | -2876 | 7707 | AN11437 |
| 2084 | CONTIG76 | 137859 | 138138 | 1.34 | 1.08E-01 | transcription_start_site | - | 135034 | 135034 | -2964 | 7708 | AN11437 |
| 2084 | CONTIG76 | 137859 | 138138 | 1.34 | 1.08E-01 | transcription_start_site | - | 135003 | 135003 | -2995 | 7709 | AN11437 |
| 1825 | CONTIG77 | 35402  | 35704  | 1.44 | 4.36E-02 | transcription_start_site | + | 35391  | 35391  | 162   | 7711 | AN11438 |
| 1825 | CONTIG77 | 35402  | 35704  | 1.44 | 4.36E-02 | transcription_start_site | + | 35335  | 35335  | 218   | 7710 | AN11438 |
| 2718 | CONTIG78 | 91953  | 92237  | 1.12 | 1.93E-01 | transcription_start_site | - | 88710  | 88710  | -3385 | 7712 | AN11439 |
| 2625 | CONTIG78 | 138996 | 139353 | 1.16 | 1.66E-01 | transcription_start_site | - | 138687 | 138687 | -487  | 7721 | AN11440 |
| 2625 | CONTIG78 | 138996 | 139353 | 1.16 | 1.66E-01 | transcription_start_site | - | 138360 | 138360 | -814  | 7722 | AN11440 |
| 1756 | CONTIG78 | 343893 | 344302 | 1.48 | 5.88E-02 | transcription_start_site | - | 342561 | 342561 | -1536 | 7727 | AN11443 |
| 1756 | CONTIG78 | 343893 | 344302 | 1.48 | 5.88E-02 | transcription_start_site | - | 342386 | 342386 | -1711 | 7728 | AN11443 |
| 523  | CONTIG79 | 86626  | 86920  | 2.41 | 5.64E-04 | transcription_start_site | - | 86758  | 86758  | -15   | 7733 | AN11445 |
| 523  | CONTIG79 | 86626  | 86920  | 2.41 | 5.64E-04 | transcription_start_site | - | 86607  | 86607  | -166  | 7734 | AN11445 |
| 1105 | CONTIG79 | 87156  | 87735  | 1.83 | 8.81E-03 | transcription_start_site | - | 86758  | 86758  | -687  | 7733 | AN11445 |
| 1105 | CONTIG79 | 87156  | 87735  | 1.83 | 8.81E-03 | transcription_start_site | - | 86607  | 86607  | -838  | 7734 | AN11445 |
| 226  | CONTIG80 | 32939  | 33509  | 2.89 | 0.00E+00 | transcription_start_site | + | 35483  | 35483  | -2259 | 7735 | AN11446 |
| 226  | CONTIG80 | 32939  | 33509  | 2.89 | 0.00E+00 | transcription_start_site | + | 35594  | 35594  | -2370 | 7736 | AN11446 |
| 226  | CONTIG80 | 32939  | 33509  | 2.89 | 0.00E+00 | transcription_start_site | + | 35873  | 35873  | -2649 | 7737 | AN11446 |
| 1126 | CONTIG80 | 35402  | 35826  | 1.81 | 2.12E-02 | transcription_start_site | + | 35594  | 35594  | 20    | 7736 | AN11446 |
| 1126 | CONTIG80 | 35402  | 35826  | 1.81 | 2.12E-02 | transcription_start_site | + | 35483  | 35483  | 131   | 7735 | AN11446 |
| 1126 | CONTIG80 | 35402  | 35826  | 1.81 | 2.12E-02 | transcription_start_site | + | 35873  | 35873  | -259  | 7737 | AN11446 |
| 2406 | CONTIG81 | 135976 | 136330 | 1.23 | 6.16E-02 | transcription_start_site | - | 131300 | 131300 | -4853 | 7738 | AN11447 |
| 2406 | CONTIG81 | 135976 | 136330 | 1.23 | 6.16E-02 | transcription_start_site | - | 131225 | 131225 | -4928 | 7739 | AN11447 |
| 3030 | CONTIG82 | 30153  | 30662  | 0.85 | 1.08E-01 | transcription_start_site | + | 31212  | 31212  | -804  | 7740 | AN11448 |
| 3030 | CONTIG82 | 30153  | 30662  | 0.85 | 1.08E-01 | transcription_start_site | + | 31313  | 31313  | -905  | 7741 | AN11448 |
| 466  | CONTIG16 | 307064 | 307493 | 2.48 | 0.00E+00 | transcription_start_site | - | 302632 | 302632 | -4646 | 7744 | AN1145  |
| 466  | CONTIG16 | 307064 | 307493 | 2.48 | 0.00E+00 | transcription_start_site | - | 302398 | 302398 | -4880 | 7745 | AN1145  |
| 1962 | CONTIG84 | 238217 | 238626 | 1.39 | 1.44E-01 | transcription_start_site | + | 239667 | 239667 | -1245 | 7751 | AN11451 |
| 1962 | CONTIG84 | 238217 | 238626 | 1.39 | 1.44E-01 | transcription_start_site | + | 239927 | 239927 | -1505 | 7752 | AN11451 |
| 729  | CONTIG84 | 249231 | 249880 | 2.17 | 4.13E-03 | transcription_start_site | - | 250159 | 250159 | 603   | 7754 | AN11452 |
| 729  | CONTIG84 | 249231 | 249880 | 2.17 | 4.13E-03 | transcription_start_site | - | 250622 | 250622 | 1066  | 7753 | AN11452 |

|               |        |        |      |          |                          |   |        |        |       |              |
|---------------|--------|--------|------|----------|--------------------------|---|--------|--------|-------|--------------|
| 1707 CONTIG84 | 447762 | 448101 | 1.5  | 1.08E-01 | transcription_start_site | + | 448728 | 448728 | -796  | 7757 AN11454 |
| 1707 CONTIG84 | 447762 | 448101 | 1.5  | 1.08E-01 | transcription_start_site | + | 448840 | 448840 | -908  | 7758 AN11454 |
| 1076 CONTIG85 | 10956  | 11243  | 1.85 | 1.84E-02 | transcription_start_site | - | 10816  | 10816  | -283  | 7761 AN11456 |
| 1076 CONTIG85 | 10956  | 11243  | 1.85 | 1.84E-02 | transcription_start_site | - | 10705  | 10705  | -394  | 7762 AN11456 |
| 267 CONTIG86  | 66230  | 66890  | 2.81 | 2.22E-03 | transcription_start_site | - | 66505  | 66505  | -55   | 7778 AN11459 |
| 161 CONTIG86  | 89252  | 89766  | 3.03 | 1.01E-03 | transcription_start_site | - | 88421  | 88421  | -1088 | 7779 AN11460 |
| 161 CONTIG86  | 89252  | 89766  | 3.03 | 1.01E-03 | transcription_start_site | - | 88265  | 88265  | -1244 | 7780 AN11460 |
| 756 CONTIG86  | 96396  | 96808  | 2.15 | 1.06E-02 | transcription_start_site | + | 99590  | 99590  | -2988 | 7781 AN11461 |
| 756 CONTIG86  | 96396  | 96808  | 2.15 | 1.06E-02 | transcription_start_site | + | 99806  | 99806  | -3204 | 7782 AN11461 |
| 1136 CONTIG88 | 159019 | 159293 | 1.8  | 7.85E-03 | transcription_start_site | + | 158481 | 158481 | 675   | 7796 AN11465 |
| 1136 CONTIG88 | 159019 | 159293 | 1.8  | 7.85E-03 | transcription_start_site | + | 158405 | 158405 | 751   | 7795 AN11465 |
| 2043 CONTIG89 | 135765 | 136189 | 1.36 | 9.24E-02 | transcription_start_site | + | 137035 | 137035 | -1058 | 7803 AN11469 |
| 2043 CONTIG89 | 135765 | 136189 | 1.36 | 9.24E-02 | transcription_start_site | + | 137193 | 137193 | -1216 | 7804 AN11469 |
| 2043 CONTIG89 | 135765 | 136189 | 1.36 | 9.24E-02 | transcription_start_site | + | 137292 | 137292 | -1315 | 7805 AN11469 |
| 445 CONTIG16  | 313742 | 314076 | 2.53 | 2.22E-03 | transcription_start_site | - | 308783 | 308783 | -5126 | 7806 AN1147  |
| 1598 CONTIG89 | 200256 | 200530 | 1.54 | 5.22E-02 | transcription_start_site | - | 196868 | 196868 | -3525 | 7807 AN11470 |
| 1598 CONTIG89 | 200256 | 200530 | 1.54 | 5.22E-02 | transcription_start_site | - | 196763 | 196763 | -3630 | 7808 AN11470 |
| 24 CONTIG89   | 224567 | 225366 | 3.57 | 0.00E+00 | transcription_start_site | + | 228691 | 228691 | -3724 | 7809 AN11471 |
| 24 CONTIG89   | 224567 | 225366 | 3.57 | 0.00E+00 | transcription_start_site | + | 228835 | 228835 | -3868 | 7810 AN11471 |
| 24 CONTIG89   | 224567 | 225366 | 3.57 | 0.00E+00 | transcription_start_site | + | 228924 | 228924 | -3957 | 7811 AN11471 |
| 24 CONTIG89   | 224567 | 225366 | 3.57 | 0.00E+00 | transcription_start_site | + | 229053 | 229053 | -4086 | 7812 AN11471 |
| 765 CONTIG89  | 227552 | 227901 | 2.13 | 2.32E-03 | transcription_start_site | + | 228691 | 228691 | -964  | 7809 AN11471 |
| 765 CONTIG89  | 227552 | 227901 | 2.13 | 2.32E-03 | transcription_start_site | + | 228835 | 228835 | -1108 | 7810 AN11471 |
| 765 CONTIG89  | 227552 | 227901 | 2.13 | 2.32E-03 | transcription_start_site | + | 228924 | 228924 | -1197 | 7811 AN11471 |
| 765 CONTIG89  | 227552 | 227901 | 2.13 | 2.32E-03 | transcription_start_site | + | 229053 | 229053 | -1326 | 7812 AN11471 |
| 1125 CONTIG89 | 268585 | 269387 | 1.81 | 1.84E-02 | transcription_start_site | - | 264398 | 264398 | -4588 | 7813 AN11472 |
| 1125 CONTIG89 | 268585 | 269387 | 1.81 | 1.84E-02 | transcription_start_site | - | 264128 | 264128 | -4858 | 7814 AN11472 |
| 1291 CONTIG93 | 140859 | 141358 | 1.7  | 2.18E-02 | transcription_start_site | + | 143758 | 143758 | -2649 | 7822 AN11475 |
| 1291 CONTIG93 | 140859 | 141358 | 1.7  | 2.18E-02 | transcription_start_site | + | 144360 | 144360 | -3251 | 7823 AN11475 |
| 1551 CONTIG93 | 142964 | 144063 | 1.56 | 3.99E-02 | transcription_start_site | + | 143758 | 143758 | -244  | 7822 AN11475 |
| 1551 CONTIG93 | 142964 | 144063 | 1.56 | 3.99E-02 | transcription_start_site | + | 144360 | 144360 | -846  | 7823 AN11475 |
| 407 CONTIG93  | 272560 | 273214 | 2.59 | 0.00E+00 | transcription_start_site | - | 273475 | 273475 | 588   | 7826 AN11476 |
| 407 CONTIG93  | 272560 | 273214 | 2.59 | 0.00E+00 | transcription_start_site | - | 273594 | 273594 | 707   | 7825 AN11476 |
| 407 CONTIG93  | 272560 | 273214 | 2.59 | 0.00E+00 | transcription_start_site | - | 273731 | 273731 | 844   | 7824 AN11476 |
| 2572 CONTIG93 | 278410 | 278981 | 1.18 | 1.93E-01 | transcription_start_site | - | 273731 | 273731 | -4964 | 7824 AN11476 |
| 2572 CONTIG93 | 278410 | 278981 | 1.18 | 1.93E-01 | transcription_start_site | - | 273594 | 273594 | -5101 | 7825 AN11476 |
| 2572 CONTIG93 | 278410 | 278981 | 1.18 | 1.93E-01 | transcription_start_site | - | 273475 | 273475 | -5220 | 7826 AN11476 |
| 498 CONTIG94  | 14329  | 14603  | 2.45 | 2.39E-04 | transcription_start_site | - | 14115  | 14115  | -351  | 7827 AN11477 |
| 498 CONTIG94  | 14329  | 14603  | 2.45 | 2.39E-04 | transcription_start_site | - | 13952  | 13952  | -514  | 7828 AN11477 |
| 445 CONTIG16  | 313742 | 314076 | 2.53 | 2.22E-03 | transcription_start_site | - | 313503 | 313503 | -406  | 7833 AN1148  |
| 445 CONTIG16  | 313742 | 314076 | 2.53 | 2.22E-03 | transcription_start_site | - | 313281 | 313281 | -628  | 7834 AN1148  |
| 1837 CONTIG16 | 316292 | 316701 | 1.44 | 1.08E-01 | transcription_start_site | - | 313503 | 313503 | -2993 | 7833 AN1148  |
| 1837 CONTIG16 | 316292 | 316701 | 1.44 | 1.08E-01 | transcription_start_site | - | 313281 | 313281 | -3215 | 7834 AN1148  |
| 2239 CONTIG16 | 314867 | 315809 | 1.29 | 1.66E-01 | transcription_start_site | - | 313503 | 313503 | -1835 | 7833 AN1148  |
| 2239 CONTIG16 | 314867 | 315809 | 1.29 | 1.66E-01 | transcription_start_site | - | 313281 | 313281 | -2057 | 7834 AN1148  |
| 330 CONTIG96  | 36621  | 37030  | 2.72 | 2.22E-03 | transcription_start_site | + | 37966  | 37966  | -1140 | 7842 AN11482 |
| 330 CONTIG96  | 36621  | 37030  | 2.72 | 2.22E-03 | transcription_start_site | + | 38222  | 38222  | -1396 | 7843 AN11482 |
| 768 CONTIG96  | 32255  | 33439  | 2.13 | 1.84E-02 | transcription_start_site | + | 37966  | 37966  | -5119 | 7842 AN11482 |
| 768 CONTIG96  | 32255  | 33439  | 2.13 | 1.84E-02 | transcription_start_site | + | 38222  | 38222  | -5375 | 7843 AN11482 |
| 358 CONTIG96  | 42313  | 42657  | 2.67 | 3.03E-03 | transcription_start_site | + | 42370  | 42370  | 115   | 7845 AN11483 |
| 358 CONTIG96  | 42313  | 42657  | 2.67 | 3.03E-03 | transcription_start_site | + | 42129  | 42129  | 356   | 7844 AN11483 |
| 820 CONTIG96  | 39906  | 40250  | 2.08 | 2.12E-02 | transcription_start_site | + | 42129  | 42129  | -2051 | 7844 AN11483 |
| 820 CONTIG96  | 39906  | 40250  | 2.08 | 2.12E-02 | transcription_start_site | + | 42370  | 42370  | -2292 | 7845 AN11483 |
| 1277 CONTIG96 | 41271  | 42284  | 1.71 | 3.41E-02 | transcription_start_site | + | 42129  | 42129  | -351  | 7844 AN11483 |
| 1277 CONTIG96 | 41271  | 42284  | 1.71 | 3.41E-02 | transcription_start_site | + | 42370  | 42370  | -592  | 7845 AN11483 |
| 1485 CONTIG96 | 43221  | 43475  | 1.6  | 9.24E-02 | transcription_start_site | + | 42370  | 42370  | 978   | 7845 AN11483 |
| 527 CONTIG97  | 9691   | 10495  | 2.41 | 1.22E-03 | transcription_start_site | - | 10596  | 10596  | 503   | 7851 AN11485 |



|      |           |        |        |      |          |                          |   |        |        |       |      |         |
|------|-----------|--------|--------|------|----------|--------------------------|---|--------|--------|-------|------|---------|
| 527  | CONTIG97  | 9691   | 10495  | 2.41 | 1.22E-03 | transcription_start_site | - | 10910  | 10910  | 817   | 7850 | AN11485 |
| 527  | CONTIG97  | 9691   | 10495  | 2.41 | 1.22E-03 | transcription_start_site | - | 11019  | 11019  | 926   | 7849 | AN11485 |
| 2151 | CONTIG98  | 104552 | 104977 | 1.32 | 1.44E-01 | transcription_start_site | + | 109534 | 109534 | -4769 | 7855 | AN11487 |
| 2151 | CONTIG98  | 104552 | 104977 | 1.32 | 1.44E-01 | transcription_start_site | + | 109729 | 109729 | -4964 | 7856 | AN11487 |
| 2151 | CONTIG98  | 104552 | 104977 | 1.32 | 1.44E-01 | transcription_start_site | + | 109923 | 109923 | -5158 | 7857 | AN11487 |
| 1276 | CONTIG98  | 167709 | 168888 | 1.71 | 2.64E-02 | transcription_start_site | - | 169211 | 169211 | 912   | 7863 | AN11488 |
| 1276 | CONTIG98  | 167709 | 168888 | 1.71 | 2.64E-02 | transcription_start_site | - | 169365 | 169365 | 1066  | 7862 | AN11488 |
| 1276 | CONTIG98  | 167709 | 168888 | 1.71 | 2.64E-02 | transcription_start_site | - | 169482 | 169482 | 1183  | 7861 | AN11488 |
| 1276 | CONTIG98  | 167709 | 168888 | 1.71 | 2.64E-02 | transcription_start_site | - | 169590 | 169590 | 1291  | 7860 | AN11488 |
| 1276 | CONTIG98  | 167709 | 168888 | 1.71 | 2.64E-02 | transcription_start_site | - | 169781 | 169781 | 1482  | 7859 | AN11488 |
| 1837 | CONTIG16  | 316292 | 316701 | 1.44 | 1.08E-01 | transcription_start_site | - | 315373 | 315373 | -1123 | 7866 | AN1149  |
| 2239 | CONTIG16  | 314867 | 315809 | 1.29 | 1.66E-01 | transcription_start_site | - | 315373 | 315373 | 35    | 7866 | AN1149  |
| 439  | CONTIG100 | 119718 | 120140 | 2.53 | 0.00E+00 | transcription_start_site | - | 119828 | 119828 | -101  | 7872 | AN11491 |
| 439  | CONTIG100 | 119718 | 120140 | 2.53 | 0.00E+00 | transcription_start_site | - | 120089 | 120089 | 160   | 7871 | AN11491 |
| 439  | CONTIG100 | 119718 | 120140 | 2.53 | 0.00E+00 | transcription_start_site | - | 120828 | 120828 | 899   | 7870 | AN11491 |
| 929  | CONTIG100 | 120168 | 120802 | 1.98 | 1.84E-02 | transcription_start_site | - | 120828 | 120828 | 343   | 7870 | AN11491 |
| 929  | CONTIG100 | 120168 | 120802 | 1.98 | 1.84E-02 | transcription_start_site | - | 120089 | 120089 | -396  | 7871 | AN11491 |
| 929  | CONTIG100 | 120168 | 120802 | 1.98 | 1.84E-02 | transcription_start_site | - | 119828 | 119828 | -657  | 7872 | AN11491 |
| 2088 | CONTIG100 | 123243 | 123577 | 1.34 | 1.44E-01 | transcription_start_site | - | 120828 | 120828 | -2582 | 7870 | AN11491 |
| 2088 | CONTIG100 | 123243 | 123577 | 1.34 | 1.44E-01 | transcription_start_site | - | 120089 | 120089 | -3321 | 7871 | AN11491 |
| 2088 | CONTIG100 | 123243 | 123577 | 1.34 | 1.44E-01 | transcription_start_site | - | 119828 | 119828 | -3582 | 7872 | AN11491 |
| 2089 | CONTIG100 | 125493 | 125977 | 1.34 | 1.44E-01 | transcription_start_site | - | 120828 | 120828 | -4907 | 7870 | AN11491 |
| 1318 | CONTIG100 | 291014 | 291301 | 1.68 | 5.22E-02 | transcription_start_site | + | 290238 | 290238 | 919   | 7875 | AN11492 |
| 1318 | CONTIG100 | 291014 | 291301 | 1.68 | 5.22E-02 | transcription_start_site | + | 290190 | 290190 | 967   | 7874 | AN11492 |
| 294  | CONTIG100 | 325515 | 326019 | 2.77 | 9.51E-04 | transcription_start_site | - | 325843 | 325843 | 76    | 7876 | AN11493 |
| 294  | CONTIG100 | 325515 | 326019 | 2.77 | 9.51E-04 | transcription_start_site | - | 325617 | 325617 | -150  | 7877 | AN11493 |
| 356  | CONTIG100 | 328817 | 329076 | 2.67 | 1.22E-03 | transcription_start_site | - | 325843 | 325843 | -3103 | 7876 | AN11493 |
| 356  | CONTIG100 | 328817 | 329076 | 2.67 | 1.22E-03 | transcription_start_site | - | 325617 | 325617 | -3329 | 7877 | AN11493 |
| 2086 | CONTIG100 | 329795 | 330439 | 1.34 | 1.28E-01 | transcription_start_site | - | 325843 | 325843 | -4274 | 7876 | AN11493 |
| 2086 | CONTIG100 | 329795 | 330439 | 1.34 | 1.28E-01 | transcription_start_site | - | 325617 | 325617 | -4500 | 7877 | AN11493 |
| 26   | CONTIG102 | 7955   | 9281   | 3.57 | 0.00E+00 | transcription_start_site | - | 8054   | 8054   | -564  | 7882 | AN11496 |
| 26   | CONTIG102 | 7955   | 9281   | 3.57 | 0.00E+00 | transcription_start_site | - | 7924   | 7924   | -694  | 7883 | AN11496 |
| 26   | CONTIG102 | 7955   | 9281   | 3.57 | 0.00E+00 | transcription_start_site | - | 7795   | 7795   | -823  | 7884 | AN11496 |
| 1156 | CONTIG104 | 149414 | 149753 | 1.79 | 1.06E-02 | transcription_start_site | - | 145833 | 145833 | -3750 | 7888 | AN11498 |
| 1156 | CONTIG104 | 149414 | 149753 | 1.79 | 1.06E-02 | transcription_start_site | - | 145719 | 145719 | -3864 | 7889 | AN11498 |
| 2540 | CONTIG104 | 161794 | 162203 | 1.19 | 1.66E-01 | transcription_start_site | + | 165932 | 165932 | -3933 | 7890 | AN11499 |
| 2540 | CONTIG104 | 161794 | 162203 | 1.19 | 1.66E-01 | transcription_start_site | + | 166037 | 166037 | -4038 | 7891 | AN11499 |
| 2540 | CONTIG104 | 161794 | 162203 | 1.19 | 1.66E-01 | transcription_start_site | + | 166221 | 166221 | -4222 | 7892 | AN11499 |
| 445  | CONTIG16  | 313742 | 314076 | 2.53 | 2.22E-03 | transcription_start_site | + | 315652 | 315652 | -1743 | 7893 | AN1150  |
| 445  | CONTIG16  | 313742 | 314076 | 2.53 | 2.22E-03 | transcription_start_site | + | 315792 | 315792 | -1883 | 7894 | AN1150  |
| 445  | CONTIG16  | 313742 | 314076 | 2.53 | 2.22E-03 | transcription_start_site | + | 316110 | 316110 | -2201 | 7895 | AN1150  |
| 1837 | CONTIG16  | 316292 | 316701 | 1.44 | 1.08E-01 | transcription_start_site | + | 316110 | 316110 | 386   | 7895 | AN1150  |
| 1837 | CONTIG16  | 316292 | 316701 | 1.44 | 1.08E-01 | transcription_start_site | + | 315792 | 315792 | 704   | 7894 | AN1150  |
| 1837 | CONTIG16  | 316292 | 316701 | 1.44 | 1.08E-01 | transcription_start_site | + | 315652 | 315652 | 844   | 7893 | AN1150  |
| 2239 | CONTIG16  | 314867 | 315809 | 1.29 | 1.66E-01 | transcription_start_site | + | 315652 | 315652 | -314  | 7893 | AN1150  |
| 2239 | CONTIG16  | 314867 | 315809 | 1.29 | 1.66E-01 | transcription_start_site | + | 315792 | 315792 | -454  | 7894 | AN1150  |
| 2239 | CONTIG16  | 314867 | 315809 | 1.29 | 1.66E-01 | transcription_start_site | + | 316110 | 316110 | -772  | 7895 | AN1150  |
| 183  | CONTIG105 | 218326 | 218685 | 2.98 | 5.64E-04 | transcription_start_site | + | 218403 | 218403 | 102   | 7902 | AN11502 |
| 183  | CONTIG105 | 218326 | 218685 | 2.98 | 5.64E-04 | transcription_start_site | + | 218250 | 218250 | 255   | 7901 | AN11502 |
| 183  | CONTIG105 | 218326 | 218685 | 2.98 | 5.64E-04 | transcription_start_site | + | 218205 | 218205 | 300   | 7900 | AN11502 |
| 856  | CONTIG105 | 213085 | 214794 | 2.05 | 3.45E-03 | transcription_start_site | + | 218205 | 218205 | -4265 | 7900 | AN11502 |
| 856  | CONTIG105 | 213085 | 214794 | 2.05 | 3.45E-03 | transcription_start_site | + | 218250 | 218250 | -4310 | 7901 | AN11502 |
| 856  | CONTIG105 | 213085 | 214794 | 2.05 | 3.45E-03 | transcription_start_site | + | 218403 | 218403 | -4463 | 7902 | AN11502 |
| 482  | CONTIG105 | 243243 | 243666 | 2.47 | 1.22E-03 | transcription_start_site | + | 242449 | 242449 | 1005  | 7904 | AN11503 |
| 482  | CONTIG105 | 243243 | 243666 | 2.47 | 1.22E-03 | transcription_start_site | + | 242348 | 242348 | 1106  | 7903 | AN11503 |
| 1384 | CONTIG105 | 241728 | 242842 | 1.64 | 4.42E-02 | transcription_start_site | + | 242348 | 242348 | -63   | 7903 | AN11503 |
| 1384 | CONTIG105 | 241728 | 242842 | 1.64 | 4.42E-02 | transcription_start_site | + | 242449 | 242449 | -164  | 7904 | AN11503 |

|      |           |        |        |      |          |                          |   |        |        |       |      |         |
|------|-----------|--------|--------|------|----------|--------------------------|---|--------|--------|-------|------|---------|
| 2096 | CONTIG105 | 238578 | 239317 | 1.34 | 1.66E-01 | transcription_start_site | + | 242348 | 242348 | -3400 | 7903 | AN11503 |
| 2096 | CONTIG105 | 238578 | 239317 | 1.34 | 1.66E-01 | transcription_start_site | + | 242449 | 242449 | -3501 | 7904 | AN11503 |
| 2515 | CONTIG106 | 4446   | 5390   | 1.2  | 1.33E-01 | transcription_start_site | - | 1270   | 1270   | -3648 | 7905 | AN11504 |
| 2515 | CONTIG106 | 4446   | 5390   | 1.2  | 1.33E-01 | transcription_start_site | - | 953    | 953    | -3965 | 7906 | AN11504 |
| 1293 | CONTIG107 | 33320  | 34644  | 1.7  | 2.62E-02 | transcription_start_site | - | 31203  | 31203  | -2779 | 7907 | AN11505 |
| 1293 | CONTIG107 | 33320  | 34644  | 1.7  | 2.62E-02 | transcription_start_site | - | 31072  | 31072  | -2910 | 7908 | AN11505 |
| 369  | CONTIG108 | 168768 | 169259 | 2.65 | 0.00E+00 | transcription_start_site | - | 170145 | 170145 | 1131  | 7915 | AN11508 |
| 524  | CONTIG108 | 171621 | 171967 | 2.41 | 6.10E-04 | transcription_start_site | - | 170641 | 170641 | -1153 | 7913 | AN11508 |
| 524  | CONTIG108 | 171621 | 171967 | 2.41 | 6.10E-04 | transcription_start_site | - | 170606 | 170606 | -1188 | 7914 | AN11508 |
| 524  | CONTIG108 | 171621 | 171967 | 2.41 | 6.10E-04 | transcription_start_site | - | 170145 | 170145 | -1649 | 7915 | AN11508 |
| 895  | CONTIG108 | 169733 | 170302 | 2    | 4.46E-04 | transcription_start_site | - | 170145 | 170145 | 127   | 7915 | AN11508 |
| 895  | CONTIG108 | 169733 | 170302 | 2    | 4.46E-04 | transcription_start_site | - | 170606 | 170606 | 588   | 7914 | AN11508 |
| 895  | CONTIG108 | 169733 | 170302 | 2    | 4.46E-04 | transcription_start_site | - | 170641 | 170641 | 623   | 7913 | AN11508 |
| 1837 | CONTIG16  | 316292 | 316701 | 1.44 | 1.08E-01 | transcription_start_site | + | 319934 | 319934 | -3437 | 7920 | AN1151  |
| 1837 | CONTIG16  | 316292 | 316701 | 1.44 | 1.08E-01 | transcription_start_site | + | 320124 | 320124 | -3627 | 7921 | AN1151  |
| 1837 | CONTIG16  | 316292 | 316701 | 1.44 | 1.08E-01 | transcription_start_site | + | 320293 | 320293 | -3796 | 7922 | AN1151  |
| 1837 | CONTIG16  | 316292 | 316701 | 1.44 | 1.08E-01 | transcription_start_site | + | 320813 | 320813 | -4316 | 7923 | AN1151  |
| 2239 | CONTIG16  | 314867 | 315809 | 1.29 | 1.66E-01 | transcription_start_site | + | 319934 | 319934 | -4596 | 7920 | AN1151  |
| 2239 | CONTIG16  | 314867 | 315809 | 1.29 | 1.66E-01 | transcription_start_site | + | 320124 | 320124 | -4786 | 7921 | AN1151  |
| 2239 | CONTIG16  | 314867 | 315809 | 1.29 | 1.66E-01 | transcription_start_site | + | 320293 | 320293 | -4955 | 7922 | AN1151  |
| 564  | CONTIG109 | 9691   | 10123  | 2.36 | 1.54E-03 | transcription_start_site | - | 5415   | 5415   | -4492 | 7948 | AN11519 |
| 564  | CONTIG109 | 9691   | 10123  | 2.36 | 1.54E-03 | transcription_start_site | - | 4819   | 4819   | -5088 | 7949 | AN11519 |
| 564  | CONTIG109 | 9691   | 10123  | 2.36 | 1.54E-03 | transcription_start_site | - | 4707   | 4707   | -5200 | 7950 | AN11519 |
| 329  | CONTIG109 | 66314  | 66593  | 2.72 | 2.39E-04 | transcription_start_site | - | 64824  | 64824  | -1629 | 7960 | AN11520 |
| 329  | CONTIG109 | 66314  | 66593  | 2.72 | 2.39E-04 | transcription_start_site | - | 64564  | 64564  | -1889 | 7961 | AN11520 |
| 1220 | CONTIG110 | 13732  | 14236  | 1.75 | 3.08E-02 | transcription_start_site | - | 14762  | 14762  | 778   | 7963 | AN11521 |
| 1220 | CONTIG110 | 13732  | 14236  | 1.75 | 3.08E-02 | transcription_start_site | - | 14942  | 14942  | 958   | 7962 | AN11521 |
| 402  | CONTIG110 | 22069  | 22329  | 2.6  | 1.01E-03 | transcription_start_site | - | 22293  | 22293  | 94    | 7965 | AN11522 |
| 402  | CONTIG110 | 22069  | 22329  | 2.6  | 1.01E-03 | transcription_start_site | - | 22442  | 22442  | 243   | 7964 | AN11522 |
| 360  | CONTIG112 | 24003  | 24502  | 2.66 | 0.00E+00 | transcription_start_site | + | 25652  | 25652  | -1399 | 7973 | AN11525 |
| 360  | CONTIG112 | 24003  | 24502  | 2.66 | 0.00E+00 | transcription_start_site | + | 25792  | 25792  | -1539 | 7974 | AN11525 |
| 360  | CONTIG112 | 24003  | 24502  | 2.66 | 0.00E+00 | transcription_start_site | + | 26095  | 26095  | -1842 | 7975 | AN11525 |
| 773  | CONTIG112 | 193055 | 193404 | 2.12 | 2.22E-03 | transcription_start_site | + | 193001 | 193001 | 228   | 7977 | AN11526 |
| 773  | CONTIG112 | 193055 | 193404 | 2.12 | 2.22E-03 | transcription_start_site | + | 192449 | 192449 | 780   | 7976 | AN11526 |
| 2712 | CONTIG112 | 193580 | 194154 | 1.12 | 1.44E-01 | transcription_start_site | + | 193001 | 193001 | 866   | 7977 | AN11526 |
| 999  | CONTIG112 | 305476 | 305758 | 1.91 | 6.61E-03 | transcription_start_site | - | 301085 | 301085 | -4532 | 7978 | AN11527 |
| 999  | CONTIG112 | 305476 | 305758 | 1.91 | 6.61E-03 | transcription_start_site | - | 300752 | 300752 | -4865 | 7979 | AN11527 |
| 385  | CONTIG112 | 351246 | 351580 | 2.62 | 0.00E+00 | transcription_start_site | + | 352906 | 352906 | -1493 | 7987 | AN11529 |
| 385  | CONTIG112 | 351246 | 351580 | 2.62 | 0.00E+00 | transcription_start_site | + | 353108 | 353108 | -1695 | 7988 | AN11529 |
| 2122 | CONTIG113 | 123527 | 123876 | 1.33 | 1.28E-01 | transcription_start_site | - | 122198 | 122198 | -1503 | 7998 | AN11531 |
| 2122 | CONTIG113 | 123527 | 123876 | 1.33 | 1.28E-01 | transcription_start_site | - | 121958 | 121958 | -1743 | 7999 | AN11531 |
| 2122 | CONTIG113 | 123527 | 123876 | 1.33 | 1.28E-01 | transcription_start_site | - | 121830 | 121830 | -1871 | 8000 | AN11531 |
| 2271 | CONTIG113 | 120992 | 121341 | 1.28 | 1.66E-01 | transcription_start_site | - | 121830 | 121830 | 663   | 8000 | AN11531 |
| 2271 | CONTIG113 | 120992 | 121341 | 1.28 | 1.66E-01 | transcription_start_site | - | 121958 | 121958 | 791   | 7999 | AN11531 |
| 2271 | CONTIG113 | 120992 | 121341 | 1.28 | 1.66E-01 | transcription_start_site | - | 122198 | 122198 | 1031  | 7998 | AN11531 |
| 879  | CONTIG117 | 6393   | 6667   | 2.02 | 8.81E-03 | transcription_start_site | - | 3732   | 3732   | -2798 | 8020 | AN11539 |
| 879  | CONTIG117 | 6393   | 6667   | 2.02 | 8.81E-03 | transcription_start_site | - | 3506   | 3506   | -3024 | 8021 | AN11539 |
| 181  | CONTIG16  | 331659 | 332005 | 2.98 | 2.16E-04 | transcription_start_site | - | 328441 | 328441 | -3391 | 8022 | AN1154  |
| 181  | CONTIG16  | 331659 | 332005 | 2.98 | 2.16E-04 | transcription_start_site | - | 328143 | 328143 | -3689 | 8023 | AN1154  |
| 181  | CONTIG16  | 331659 | 332005 | 2.98 | 2.16E-04 | transcription_start_site | - | 327861 | 327861 | -3971 | 8024 | AN1154  |
| 181  | CONTIG16  | 331659 | 332005 | 2.98 | 2.16E-04 | transcription_start_site | - | 327608 | 327608 | -4224 | 8025 | AN1154  |
| 37   | CONTIG117 | 166963 | 167377 | 3.49 | 0.00E+00 | transcription_start_site | + | 171586 | 171586 | -4416 | 8030 | AN11541 |
| 37   | CONTIG117 | 166963 | 167377 | 3.49 | 0.00E+00 | transcription_start_site | + | 171770 | 171770 | -4600 | 8031 | AN11541 |
| 37   | CONTIG117 | 166963 | 167377 | 3.49 | 0.00E+00 | transcription_start_site | + | 172105 | 172105 | -4935 | 8032 | AN11541 |
| 452  | CONTIG117 | 173195 | 173459 | 2.52 | 1.01E-03 | transcription_start_site | - | 174072 | 174072 | 745   | 8036 | AN11542 |
| 452  | CONTIG117 | 173195 | 173459 | 2.52 | 1.01E-03 | transcription_start_site | - | 174154 | 174154 | 827   | 8035 | AN11542 |
| 452  | CONTIG117 | 173195 | 173459 | 2.52 | 1.01E-03 | transcription_start_site | - | 174222 | 174222 | 895   | 8034 | AN11542 |

|      |           |        |        |      |          |                          |   |        |        |       |      |         |
|------|-----------|--------|--------|------|----------|--------------------------|---|--------|--------|-------|------|---------|
| 1671 | CONTIG117 | 228240 | 228879 | 1.51 | 3.99E-02 | transcription_start_site | + | 228930 | 228930 | -370  | 8037 | AN11543 |
| 1671 | CONTIG117 | 228240 | 228879 | 1.51 | 3.99E-02 | transcription_start_site | + | 229088 | 229088 | -528  | 8038 | AN11543 |
| 1671 | CONTIG117 | 228240 | 228879 | 1.51 | 3.99E-02 | transcription_start_site | + | 229341 | 229341 | -781  | 8039 | AN11543 |
| 2227 | CONTIG117 | 230045 | 230304 | 1.29 | 1.25E-01 | transcription_start_site | + | 229341 | 229341 | 833   | 8039 | AN11543 |
| 2227 | CONTIG117 | 230045 | 230304 | 1.29 | 1.25E-01 | transcription_start_site | + | 229088 | 229088 | 1086  | 8038 | AN11543 |
| 644  | CONTIG119 | 122643 | 123142 | 2.24 | 0.00E+00 | transcription_start_site | + | 124158 | 124158 | -1265 | 8042 | AN11545 |
| 644  | CONTIG119 | 122643 | 123142 | 2.24 | 0.00E+00 | transcription_start_site | + | 124398 | 124398 | -1505 | 8043 | AN11545 |
| 699  | CONTIG123 | 43052  | 44161  | 2.19 | 0.00E+00 | transcription_start_site | - | 41646  | 41646  | -1960 | 8055 | AN11551 |
| 699  | CONTIG123 | 43052  | 44161  | 2.19 | 0.00E+00 | transcription_start_site | - | 41474  | 41474  | -2132 | 8056 | AN11551 |
| 2401 | CONTIG128 | 3841   | 4105   | 1.23 | 5.88E-02 | transcription_start_site | + | 6650   | 6650   | -2677 | 8063 | AN11554 |
| 2401 | CONTIG128 | 3841   | 4105   | 1.23 | 5.88E-02 | transcription_start_site | + | 6844   | 6844   | -2871 | 8064 | AN11554 |
| 487  | CONTIG128 | 107561 | 108148 | 2.46 | 0.00E+00 | transcription_start_site | - | 103426 | 103426 | -4428 | 8065 | AN11555 |
| 487  | CONTIG128 | 107561 | 108148 | 2.46 | 0.00E+00 | transcription_start_site | - | 103173 | 103173 | -4681 | 8066 | AN11555 |
| 487  | CONTIG128 | 107561 | 108148 | 2.46 | 0.00E+00 | transcription_start_site | - | 103015 | 103015 | -4839 | 8067 | AN11555 |
| 2950 | CONTIG128 | 105526 | 106120 | 0.97 | 1.50E-01 | transcription_start_site | - | 103426 | 103426 | -2397 | 8065 | AN11555 |
| 2950 | CONTIG128 | 105526 | 106120 | 0.97 | 1.50E-01 | transcription_start_site | - | 103173 | 103173 | -2650 | 8066 | AN11555 |
| 2950 | CONTIG128 | 105526 | 106120 | 0.97 | 1.50E-01 | transcription_start_site | - | 103015 | 103015 | -2808 | 8067 | AN11555 |
| 181  | CONTIG16  | 331659 | 332005 | 2.98 | 2.16E-04 | transcription_start_site | + | 332009 | 332009 | -177  | 8076 | AN11556 |
| 181  | CONTIG16  | 331659 | 332005 | 2.98 | 2.16E-04 | transcription_start_site | + | 332197 | 332197 | -365  | 8077 | AN11556 |
| 181  | CONTIG16  | 331659 | 332005 | 2.98 | 2.16E-04 | transcription_start_site | + | 332882 | 332882 | -1050 | 8078 | AN11556 |
| 273  | CONTIG129 | 95113  | 95377  | 2.8  | 2.39E-04 | transcription_start_site | + | 95919  | 95919  | -674  | 8091 | AN11563 |
| 1217 | CONTIG129 | 91053  | 91569  | 1.75 | 2.62E-02 | transcription_start_site | + | 95919  | 95919  | -4608 | 8091 | AN11563 |
| 2648 | CONTIG129 | 94058  | 94421  | 1.15 | 1.93E-01 | transcription_start_site | + | 95919  | 95919  | -1679 | 8091 | AN11563 |
| 442  | CONTIG129 | 184971 | 185245 | 2.53 | 1.01E-03 | transcription_start_site | + | 184835 | 184835 | 273   | 8093 | AN11564 |
| 442  | CONTIG129 | 184971 | 185245 | 2.53 | 1.01E-03 | transcription_start_site | + | 184585 | 184585 | 523   | 8092 | AN11564 |
| 2222 | CONTIG129 | 347039 | 347683 | 1.29 | 1.07E-01 | transcription_start_site | + | 352169 | 352169 | -4808 | 8101 | AN11567 |
| 2222 | CONTIG129 | 347039 | 347683 | 1.29 | 1.07E-01 | transcription_start_site | + | 352266 | 352266 | -4905 | 8102 | AN11567 |
| 2649 | CONTIG129 | 461026 | 461300 | 1.15 | 1.93E-01 | transcription_start_site | + | 466115 | 466115 | -4952 | 8105 | AN11569 |
| 2649 | CONTIG129 | 461026 | 461300 | 1.15 | 1.93E-01 | transcription_start_site | + | 466281 | 466281 | -5118 | 8106 | AN11569 |
| 712  | CONTIG16  | 343129 | 343564 | 2.19 | 8.81E-03 | transcription_start_site | - | 342583 | 342583 | -763  | 8107 | AN11557 |
| 712  | CONTIG16  | 343129 | 343564 | 2.19 | 8.81E-03 | transcription_start_site | - | 341985 | 341985 | -1361 | 8108 | AN11557 |
| 712  | CONTIG16  | 343129 | 343564 | 2.19 | 8.81E-03 | transcription_start_site | - | 341711 | 341711 | -1635 | 8109 | AN11557 |
| 279  | CONTIG130 | 125035 | 125319 | 2.8  | 6.10E-04 | transcription_start_site | + | 126429 | 126429 | -1252 | 8110 | AN11570 |
| 279  | CONTIG130 | 125035 | 125319 | 2.8  | 6.10E-04 | transcription_start_site | + | 126565 | 126565 | -1388 | 8111 | AN11570 |
| 1078 | CONTIG130 | 122420 | 123219 | 1.85 | 2.12E-02 | transcription_start_site | + | 126429 | 126429 | -3609 | 8110 | AN11570 |
| 1078 | CONTIG130 | 122420 | 123219 | 1.85 | 2.12E-02 | transcription_start_site | + | 126565 | 126565 | -3745 | 8111 | AN11570 |
| 769  | CONTIG131 | 99690  | 100254 | 2.12 | 0.00E+00 | transcription_start_site | - | 95459  | 95459  | -4513 | 8112 | AN11571 |
| 769  | CONTIG131 | 99690  | 100254 | 2.12 | 0.00E+00 | transcription_start_site | - | 95337  | 95337  | -4635 | 8113 | AN11571 |
| 712  | CONTIG16  | 343129 | 343564 | 2.19 | 8.81E-03 | transcription_start_site | + | 345593 | 345593 | -2246 | 8137 | AN11558 |
| 712  | CONTIG16  | 343129 | 343564 | 2.19 | 8.81E-03 | transcription_start_site | + | 345762 | 345762 | -2415 | 8138 | AN11558 |
| 712  | CONTIG16  | 343129 | 343564 | 2.19 | 8.81E-03 | transcription_start_site | + | 348447 | 348447 | -5100 | 8139 | AN11558 |
| 1683 | CONTIG134 | 74720  | 76494  | 1.5  | 3.03E-03 | transcription_start_site | - | 73238  | 73238  | -2369 | 8144 | AN11581 |
| 2652 | CONTIG134 | 76970  | 77310  | 1.14 | 2.62E-02 | transcription_start_site | - | 73238  | 73238  | -3902 | 8144 | AN11581 |
| 2807 | CONTIG135 | 3541   | 3800   | 1.06 | 1.08E-01 | transcription_start_site | - | 1868   | 1868   | -1802 | 8145 | AN11582 |
| 2807 | CONTIG135 | 3541   | 3800   | 1.06 | 1.08E-01 | transcription_start_site | - | 1495   | 1495   | -2175 | 8146 | AN11582 |
| 2861 | CONTIG135 | 2551   | 3135   | 1.03 | 1.07E-01 | transcription_start_site | - | 1868   | 1868   | -975  | 8145 | AN11582 |
| 2861 | CONTIG135 | 2551   | 3135   | 1.03 | 1.07E-01 | transcription_start_site | - | 1495   | 1495   | -1348 | 8146 | AN11582 |
| 2344 | CONTIG135 | 96770  | 97119  | 1.25 | 3.33E-02 | transcription_start_site | + | 95961  | 95961  | 983   | 8150 | AN11584 |
| 2462 | CONTIG135 | 279768 | 280412 | 1.21 | 3.99E-02 | transcription_start_site | + | 282978 | 282978 | -2888 | 8151 | AN11585 |
| 2462 | CONTIG135 | 279768 | 280412 | 1.21 | 3.99E-02 | transcription_start_site | + | 283413 | 283413 | -3323 | 8152 | AN11585 |
| 2462 | CONTIG135 | 279768 | 280412 | 1.21 | 3.99E-02 | transcription_start_site | + | 283781 | 283781 | -3691 | 8153 | AN11585 |
| 2462 | CONTIG135 | 279768 | 280412 | 1.21 | 3.99E-02 | transcription_start_site | + | 283960 | 283960 | -3870 | 8154 | AN11585 |
| 1354 | CONTIG140 | 19887  | 20301  | 1.66 | 2.64E-02 | transcription_start_site | + | 21720  | 21720  | -1626 | 8160 | AN11588 |
| 1354 | CONTIG140 | 19887  | 20301  | 1.66 | 2.64E-02 | transcription_start_site | + | 21873  | 21873  | -1779 | 8161 | AN11588 |
| 1780 | CONTIG140 | 16952  | 17241  | 1.47 | 8.01E-02 | transcription_start_site | + | 21720  | 21720  | -4623 | 8160 | AN11588 |
| 1780 | CONTIG140 | 16952  | 17241  | 1.47 | 8.01E-02 | transcription_start_site | + | 21873  | 21873  | -4776 | 8161 | AN11588 |
| 2418 | CONTIG140 | 19132  | 19788  | 1.23 | 1.50E-01 | transcription_start_site | + | 21720  | 21720  | -2260 | 8160 | AN11588 |

|      |           |        |        |      |          |                          |   |        |        |       |      |         |
|------|-----------|--------|--------|------|----------|--------------------------|---|--------|--------|-------|------|---------|
| 2418 | CONTIG140 | 19132  | 19788  | 1.23 | 1.50E-01 | transcription_start_site | + | 21873  | 21873  | -2413 | 8161 | AN11588 |
| 2959 | CONTIG141 | 57977  | 58491  | 0.96 | 1.50E-01 | transcription_start_site | + | 58947  | 58947  | -713  | 8168 | AN11590 |
| 2959 | CONTIG141 | 57977  | 58491  | 0.96 | 1.50E-01 | transcription_start_site | + | 59039  | 59039  | -805  | 8169 | AN11590 |
| 1236 | CONTIG142 | 19651  | 20463  | 1.74 | 2.62E-02 | transcription_start_site | + | 24825  | 24825  | -4768 | 8183 | AN11597 |
| 1236 | CONTIG142 | 19651  | 20463  | 1.74 | 2.62E-02 | transcription_start_site | + | 25101  | 25101  | -5044 | 8184 | AN11597 |
| 62   | CONTIG145 | 40201  | 40552  | 3.37 | 0.00E+00 | transcription_start_site | - | 37459  | 37459  | -2917 | 8185 | AN11598 |
| 62   | CONTIG145 | 40201  | 40552  | 3.37 | 0.00E+00 | transcription_start_site | - | 37339  | 37339  | -3037 | 8186 | AN11598 |
| 62   | CONTIG145 | 40201  | 40552  | 3.37 | 0.00E+00 | transcription_start_site | - | 37001  | 37001  | -3375 | 8187 | AN11598 |
| 1314 | CONTIG145 | 38496  | 38900  | 1.68 | 3.08E-02 | transcription_start_site | - | 37459  | 37459  | -1239 | 8185 | AN11598 |
| 1314 | CONTIG145 | 38496  | 38900  | 1.68 | 3.08E-02 | transcription_start_site | - | 37339  | 37339  | -1359 | 8186 | AN11598 |
| 1314 | CONTIG145 | 38496  | 38900  | 1.68 | 3.08E-02 | transcription_start_site | - | 37001  | 37001  | -1697 | 8187 | AN11598 |
| 3040 | CONTIG146 | 7506   | 8090   | 0.8  | 1.66E-01 | transcription_start_site | - | 2934   | 2934   | -4864 | 8188 | AN11599 |
| 3040 | CONTIG146 | 7506   | 8090   | 0.8  | 1.66E-01 | transcription_start_site | - | 2584   | 2584   | -5214 | 8189 | AN11599 |
| 2962 | CONTIG150 | 104251 | 104620 | 0.95 | 1.25E-01 | transcription_start_site | - | 102527 | 102527 | -1908 | 8196 | AN11601 |
| 2962 | CONTIG150 | 104251 | 104620 | 0.95 | 1.25E-01 | transcription_start_site | - | 102240 | 102240 | -2195 | 8197 | AN11601 |
| 2769 | CONTIG152 | 26858  | 27282  | 1.08 | 5.41E-03 | transcription_start_site | + | 31546  | 31546  | -4476 | 8202 | AN11604 |
| 2769 | CONTIG152 | 26858  | 27282  | 1.08 | 5.41E-03 | transcription_start_site | + | 31630  | 31630  | -4560 | 8203 | AN11604 |
| 2769 | CONTIG152 | 26858  | 27282  | 1.08 | 5.41E-03 | transcription_start_site | + | 31890  | 31890  | -4820 | 8204 | AN11605 |
| 1893 | CONTIG153 | 82068  | 82429  | 1.41 | 2.12E-02 | transcription_start_site | + | 82432  | 82432  | -183  | 8209 | AN11607 |
| 1893 | CONTIG153 | 82068  | 82429  | 1.41 | 2.12E-02 | transcription_start_site | + | 82686  | 82686  | -437  | 8210 | AN11607 |
| 2882 | CONTIG153 | 79578  | 80017  | 1.01 | 1.25E-01 | transcription_start_site | + | 82432  | 82432  | -2634 | 8209 | AN11607 |
| 2882 | CONTIG153 | 79578  | 80017  | 1.01 | 1.25E-01 | transcription_start_site | + | 82686  | 82686  | -2888 | 8210 | AN11607 |
| 3013 | CONTIG153 | 77788  | 78202  | 0.9  | 1.93E-01 | transcription_start_site | + | 82432  | 82432  | -4437 | 8209 | AN11607 |
| 3013 | CONTIG153 | 77788  | 78202  | 0.9  | 1.93E-01 | transcription_start_site | + | 82686  | 82686  | -4691 | 8210 | AN11607 |
| 2822 | CONTIG153 | 115126 | 115711 | 1.05 | 8.36E-02 | transcription_start_site | - | 112029 | 112029 | -3389 | 8211 | AN11608 |
| 3014 | CONTIG153 | 116182 | 116761 | 0.9  | 1.93E-01 | transcription_start_site | - | 112029 | 112029 | -4442 | 8211 | AN11608 |
| 2628 | CONTIG153 | 157815 | 158769 | 1.15 | 5.05E-02 | transcription_start_site | - | 155746 | 155746 | -2546 | 8223 | AN11612 |
| 2628 | CONTIG153 | 157815 | 158769 | 1.15 | 5.05E-02 | transcription_start_site | - | 155548 | 155548 | -2744 | 8224 | AN11612 |
| 2628 | CONTIG153 | 157815 | 158769 | 1.15 | 5.05E-02 | transcription_start_site | - | 155448 | 155448 | -2844 | 8225 | AN11612 |
| 2628 | CONTIG153 | 157815 | 158769 | 1.15 | 5.05E-02 | transcription_start_site | - | 155347 | 155347 | -2945 | 8226 | AN11612 |
| 2883 | CONTIG153 | 178276 | 178717 | 1.01 | 1.25E-01 | transcription_start_site | - | 175743 | 175743 | -2753 | 8227 | AN11613 |
| 2883 | CONTIG153 | 178276 | 178717 | 1.01 | 1.25E-01 | transcription_start_site | - | 175520 | 175520 | -2976 | 8228 | AN11613 |
| 1414 | CONTIG153 | 342843 | 343327 | 1.62 | 3.31E-03 | transcription_start_site | + | 344755 | 344755 | -1670 | 8231 | AN11615 |
| 1414 | CONTIG153 | 342843 | 343327 | 1.62 | 3.31E-03 | transcription_start_site | + | 344908 | 344908 | -1823 | 8232 | AN11615 |
| 1632 | CONTIG153 | 340058 | 340632 | 1.52 | 1.30E-02 | transcription_start_site | + | 344755 | 344755 | -4410 | 8231 | AN11615 |
| 1632 | CONTIG153 | 340058 | 340632 | 1.52 | 1.30E-02 | transcription_start_site | + | 344908 | 344908 | -4563 | 8232 | AN11615 |
| 1349 | CONTIG153 | 359414 | 359683 | 1.66 | 6.61E-03 | transcription_start_site | + | 362984 | 362984 | -3435 | 8233 | AN11616 |
| 1349 | CONTIG153 | 359414 | 359683 | 1.66 | 6.61E-03 | transcription_start_site | + | 363753 | 363753 | -4204 | 8234 | AN11616 |
| 2175 | CONTIG153 | 359788 | 360891 | 1.3  | 2.18E-02 | transcription_start_site | + | 362984 | 362984 | -2644 | 8233 | AN11616 |
| 2175 | CONTIG153 | 359788 | 360891 | 1.3  | 2.18E-02 | transcription_start_site | + | 363753 | 363753 | -3413 | 8234 | AN11616 |
| 1398 | CONTIG154 | 3471   | 3743   | 1.63 | 3.08E-02 | transcription_start_site | - | 2063   | 2063   | -1544 | 8235 | AN11617 |
| 1398 | CONTIG154 | 3471   | 3743   | 1.63 | 3.08E-02 | transcription_start_site | - | 1913   | 1913   | -1694 | 8236 | AN11617 |
| 506  | CONTIG157 | 38854  | 39203  | 2.43 | 2.16E-04 | transcription_start_site | - | 37909  | 37909  | -1119 | 8250 | AN11621 |
| 506  | CONTIG157 | 38854  | 39203  | 2.43 | 2.16E-04 | transcription_start_site | - | 37717  | 37717  | -1311 | 8251 | AN11621 |
| 506  | CONTIG157 | 38854  | 39203  | 2.43 | 2.16E-04 | transcription_start_site | - | 37424  | 37424  | -1604 | 8252 | AN11621 |
| 352  | CONTIG158 | 86194  | 87058  | 2.68 | 1.22E-03 | transcription_start_site | - | 86670  | 86670  | 44    | 8261 | AN11624 |
| 352  | CONTIG158 | 86194  | 87058  | 2.68 | 1.22E-03 | transcription_start_site | - | 86774  | 86774  | 148   | 8260 | AN11624 |
| 352  | CONTIG158 | 86194  | 87058  | 2.68 | 1.22E-03 | transcription_start_site | - | 86439  | 86439  | -187  | 8262 | AN11624 |
| 1250 | CONTIG158 | 84454  | 85783  | 1.73 | 8.01E-02 | transcription_start_site | - | 86439  | 86439  | 1320  | 8262 | AN11624 |
| 1250 | CONTIG158 | 84454  | 85783  | 1.73 | 8.01E-02 | transcription_start_site | - | 86670  | 86670  | 1551  | 8261 | AN11624 |
| 1250 | CONTIG158 | 84454  | 85783  | 1.73 | 8.01E-02 | transcription_start_site | - | 86774  | 86774  | 1655  | 8260 | AN11624 |
| 352  | CONTIG158 | 86194  | 87058  | 2.68 | 1.22E-03 | transcription_start_site | + | 87039  | 87039  | -413  | 8263 | AN11625 |
| 352  | CONTIG158 | 86194  | 87058  | 2.68 | 1.22E-03 | transcription_start_site | + | 87246  | 87246  | -620  | 8264 | AN11625 |
| 352  | CONTIG158 | 86194  | 87058  | 2.68 | 1.22E-03 | transcription_start_site | + | 87527  | 87527  | -901  | 8265 | AN11625 |
| 1250 | CONTIG158 | 84454  | 85783  | 1.73 | 8.01E-02 | transcription_start_site | + | 87039  | 87039  | -1920 | 8263 | AN11625 |
| 1250 | CONTIG158 | 84454  | 85783  | 1.73 | 8.01E-02 | transcription_start_site | + | 87246  | 87246  | -2127 | 8264 | AN11625 |
| 1250 | CONTIG158 | 84454  | 85783  | 1.73 | 8.01E-02 | transcription_start_site | + | 87527  | 87527  | -2408 | 8265 | AN11625 |

|      |           |        |        |      |          |                          |   |        |        |       |      |         |
|------|-----------|--------|--------|------|----------|--------------------------|---|--------|--------|-------|------|---------|
| 1682 | CONTIG160 | 135382 | 135661 | 1.51 | 1.44E-01 | transcription_start_site | - | 136387 | 136387 | 865   | 8272 | AN11629 |
| 1682 | CONTIG160 | 135382 | 135661 | 1.51 | 1.44E-01 | transcription_start_site | - | 136466 | 136466 | 944   | 8271 | AN11629 |
| 3057 | CONTIG163 | 55671  | 56095  | 0.72 | 1.44E-01 | transcription_start_site | + | 57252  | 57252  | -1369 | 8278 | AN11632 |
| 3057 | CONTIG163 | 55671  | 56095  | 0.72 | 1.44E-01 | transcription_start_site | + | 57551  | 57551  | -1668 | 8279 | AN11632 |
| 3066 | CONTIG163 | 52666  | 53080  | 0.66 | 1.93E-01 | transcription_start_site | + | 57252  | 57252  | -4379 | 8278 | AN11632 |
| 3066 | CONTIG163 | 52666  | 53080  | 0.66 | 1.93E-01 | transcription_start_site | + | 57551  | 57551  | -4678 | 8279 | AN11632 |
| 260  | CONTIG164 | 48385  | 48891  | 2.82 | 0.00E+00 | transcription_start_site | - | 47259  | 47259  | -1379 | 8280 | AN11633 |
| 260  | CONTIG164 | 48385  | 48891  | 2.82 | 0.00E+00 | transcription_start_site | - | 46996  | 46996  | -1642 | 8281 | AN11633 |
| 260  | CONTIG164 | 48385  | 48891  | 2.82 | 0.00E+00 | transcription_start_site | - | 46824  | 46824  | -1814 | 8282 | AN11633 |
| 260  | CONTIG164 | 48385  | 48891  | 2.82 | 0.00E+00 | transcription_start_site | - | 46694  | 46694  | -1944 | 8283 | AN11633 |
| 2835 | CONTIG165 | 25878  | 26227  | 1.05 | 1.93E-01 | transcription_start_site | - | 22128  | 22128  | -3924 | 8284 | AN11634 |
| 2835 | CONTIG165 | 25878  | 26227  | 1.05 | 1.93E-01 | transcription_start_site | - | 22013  | 22013  | -4039 | 8285 | AN11634 |
| 698  | CONTIG168 | 6451   | 6875   | 2.19 | 0.00E+00 | transcription_start_site | - | 3517   | 3517   | -3146 | 8291 | AN11638 |
| 698  | CONTIG168 | 6451   | 6875   | 2.19 | 0.00E+00 | transcription_start_site | - | 3319   | 3319   | -3344 | 8292 | AN11638 |
| 698  | CONTIG168 | 6451   | 6875   | 2.19 | 0.00E+00 | transcription_start_site | - | 3037   | 3037   | -3626 | 8293 | AN11638 |
| 1478 | CONTIG168 | 65029  | 65303  | 1.6  | 2.62E-02 | transcription_start_site | - | 61563  | 61563  | -3603 | 8294 | AN11639 |
| 1478 | CONTIG168 | 65029  | 65303  | 1.6  | 2.62E-02 | transcription_start_site | - | 61420  | 61420  | -3746 | 8295 | AN11639 |
| 2663 | CONTIG168 | 64054  | 64558  | 1.14 | 1.44E-01 | transcription_start_site | - | 61563  | 61563  | -2743 | 8294 | AN11639 |
| 2663 | CONTIG168 | 64054  | 64558  | 1.14 | 1.44E-01 | transcription_start_site | - | 61420  | 61420  | -2886 | 8295 | AN11639 |
| 21   | CONTIG169 | 238070 | 238404 | 3.6  | 0.00E+00 | transcription_start_site | - | 238319 | 238319 | 82    | 8303 | AN11641 |
| 21   | CONTIG169 | 238070 | 238404 | 3.6  | 0.00E+00 | transcription_start_site | - | 238614 | 238614 | 377   | 8302 | AN11641 |
| 2409 | CONTIG169 | 320266 | 320845 | 1.23 | 1.08E-01 | transcription_start_site | - | 316737 | 316737 | -3818 | 8307 | AN11643 |
| 2409 | CONTIG169 | 320266 | 320845 | 1.23 | 1.08E-01 | transcription_start_site | - | 316642 | 316642 | -3913 | 8308 | AN11643 |
| 2409 | CONTIG169 | 320266 | 320845 | 1.23 | 1.08E-01 | transcription_start_site | - | 316501 | 316501 | -4054 | 8309 | AN11643 |
| 2409 | CONTIG169 | 320266 | 320845 | 1.23 | 1.08E-01 | transcription_start_site | - | 316414 | 316414 | -4141 | 8310 | AN11643 |
| 2674 | CONTIG170 | 120170 | 120964 | 1.13 | 1.09E-01 | transcription_start_site | + | 125032 | 125032 | -4465 | 8313 | AN11645 |
| 2674 | CONTIG170 | 120170 | 120964 | 1.13 | 1.09E-01 | transcription_start_site | + | 125102 | 125102 | -4535 | 8314 | AN11645 |
| 69   | CONTIG172 | 84095  | 84440  | 3.32 | 0.00E+00 | transcription_start_site | - | 83534  | 83534  | -733  | 8322 | AN11649 |
| 69   | CONTIG172 | 84095  | 84440  | 3.32 | 0.00E+00 | transcription_start_site | - | 83489  | 83489  | -778  | 8323 | AN11649 |
| 69   | CONTIG172 | 84095  | 84440  | 3.32 | 0.00E+00 | transcription_start_site | + | 84506  | 84506  | -238  | 8327 | AN11650 |
| 69   | CONTIG172 | 84095  | 84440  | 3.32 | 0.00E+00 | transcription_start_site | + | 84625  | 84625  | -357  | 8328 | AN11650 |
| 2404 | CONTIG172 | 306159 | 306653 | 1.23 | 5.88E-02 | transcription_start_site | - | 301476 | 301476 | -4930 | 8343 | AN11656 |
| 2404 | CONTIG172 | 306159 | 306653 | 1.23 | 5.88E-02 | transcription_start_site | - | 301309 | 301309 | -5097 | 8344 | AN11656 |
| 2603 | CONTIG172 | 343429 | 343713 | 1.16 | 8.01E-02 | transcription_start_site | + | 347030 | 347030 | -3459 | 8345 | AN11657 |
| 2603 | CONTIG172 | 343429 | 343713 | 1.16 | 8.01E-02 | transcription_start_site | + | 347197 | 347197 | -3626 | 8346 | AN11657 |
| 2914 | CONTIG174 | 16801  | 17080  | 0.99 | 2.62E-02 | transcription_start_site | + | 19974  | 19974  | -3033 | 8367 | AN11662 |
| 2914 | CONTIG174 | 16801  | 17080  | 0.99 | 2.62E-02 | transcription_start_site | + | 20181  | 20181  | -3240 | 8368 | AN11662 |
| 2914 | CONTIG174 | 16801  | 17080  | 0.99 | 2.62E-02 | transcription_start_site | + | 20298  | 20298  | -3357 | 8369 | AN11662 |
| 2914 | CONTIG174 | 16801  | 17080  | 0.99 | 2.62E-02 | transcription_start_site | + | 20484  | 20484  | -3543 | 8370 | AN11662 |
| 2914 | CONTIG174 | 16801  | 17080  | 0.99 | 2.62E-02 | transcription_start_site | + | 20833  | 20833  | -3892 | 8371 | AN11662 |
| 2914 | CONTIG174 | 16801  | 17080  | 0.99 | 2.62E-02 | transcription_start_site | + | 20901  | 20901  | -3960 | 8372 | AN11662 |
| 2914 | CONTIG174 | 16801  | 17080  | 0.99 | 2.62E-02 | transcription_start_site | + | 21053  | 21053  | -4112 | 8373 | AN11662 |
| 2914 | CONTIG174 | 16801  | 17080  | 0.99 | 2.62E-02 | transcription_start_site | + | 21190  | 21190  | -4249 | 8374 | AN11662 |
| 995  | CONTIG187 | 4352   | 4641   | 1.92 | 1.66E-01 | transcription_start_site | + | 3906   | 3906   | 590   | 8390 | AN11667 |
| 995  | CONTIG187 | 4352   | 4641   | 1.92 | 1.66E-01 | transcription_start_site | + | 3824   | 3824   | 672   | 8389 | AN11667 |
| 995  | CONTIG187 | 4352   | 4641   | 1.92 | 1.66E-01 | transcription_start_site | + | 3389   | 3389   | 1107  | 8388 | AN11667 |
| 197  | CONTIG187 | 6992   | 7266   | 2.95 | 1.84E-02 | transcription_start_site | - | 6561   | 6561   | -568  | 8391 | AN11668 |
| 197  | CONTIG187 | 6992   | 7266   | 2.95 | 1.84E-02 | transcription_start_site | - | 6387   | 6387   | -742  | 8392 | AN11668 |
| 833  | CONTIG187 | 7817   | 8461   | 2.07 | 1.07E-01 | transcription_start_site | - | 6561   | 6561   | -1578 | 8391 | AN11668 |
| 833  | CONTIG187 | 7817   | 8461   | 2.07 | 1.07E-01 | transcription_start_site | - | 6387   | 6387   | -1752 | 8392 | AN11668 |
| 958  | CONTIG189 | 5041   | 5600   | 1.95 | 9.21E-03 | transcription_start_site | - | 3444   | 3444   | -1876 | 8393 | AN11669 |
| 958  | CONTIG189 | 5041   | 5600   | 1.95 | 9.21E-03 | transcription_start_site | - | 3150   | 3150   | -2170 | 8394 | AN11669 |
| 2034 | CONTIG223 | 4276   | 4775   | 1.36 | 3.70E-02 | transcription_start_site | - | 1539   | 1539   | -2986 | 8408 | AN11674 |
| 2034 | CONTIG223 | 4276   | 4775   | 1.36 | 3.70E-02 | transcription_start_site | - | 1309   | 1309   | -3216 | 8409 | AN11674 |
| 2091 | CONTIG16  | 386265 | 386529 | 1.34 | 1.44E-01 | transcription_start_site | - | 381951 | 381951 | -4446 | 8422 | AN1170  |
| 2091 | CONTIG16  | 386265 | 386529 | 1.34 | 1.44E-01 | transcription_start_site | - | 381877 | 381877 | -4520 | 8423 | AN1170  |
| 2091 | CONTIG16  | 386265 | 386529 | 1.34 | 1.44E-01 | transcription_start_site | - | 381776 | 381776 | -4621 | 8424 | AN1170  |

|               |        |        |      |          |                          |   |        |        |       |             |
|---------------|--------|--------|------|----------|--------------------------|---|--------|--------|-------|-------------|
| 1944 CONTIG16 | 389251 | 390425 | 1.39 | 8.00E-02 | transcription_start_site | - | 385968 | 385968 | -3870 | 8426 AN1171 |
| 1944 CONTIG16 | 389251 | 390425 | 1.39 | 8.00E-02 | transcription_start_site | - | 385707 | 385707 | -4131 | 8427 AN1171 |
| 1944 CONTIG16 | 389251 | 390425 | 1.39 | 8.00E-02 | transcription_start_site | - | 385021 | 385021 | -4817 | 8428 AN1171 |
| 2091 CONTIG16 | 386265 | 386529 | 1.34 | 1.44E-01 | transcription_start_site | - | 385968 | 385968 | -429  | 8426 AN1171 |
| 2091 CONTIG16 | 386265 | 386529 | 1.34 | 1.44E-01 | transcription_start_site | - | 385707 | 385707 | -690  | 8427 AN1171 |
| 2091 CONTIG16 | 386265 | 386529 | 1.34 | 1.44E-01 | transcription_start_site | - | 385021 | 385021 | -1376 | 8428 AN1171 |
| 2091 CONTIG16 | 386265 | 386529 | 1.34 | 1.44E-01 | transcription_start_site | + | 387432 | 387432 | -1035 | 8429 AN1172 |
| 2091 CONTIG16 | 386265 | 386529 | 1.34 | 1.44E-01 | transcription_start_site | + | 387697 | 387697 | -1300 | 8430 AN1172 |
| 1944 CONTIG16 | 389251 | 390425 | 1.39 | 8.00E-02 | transcription_start_site | + | 390102 | 390102 | -264  | 8431 AN1173 |
| 1944 CONTIG16 | 389251 | 390425 | 1.39 | 8.00E-02 | transcription_start_site | + | 390168 | 390168 | -330  | 8432 AN1173 |
| 1944 CONTIG16 | 389251 | 390425 | 1.39 | 8.00E-02 | transcription_start_site | + | 391173 | 391173 | -1335 | 8433 AN1173 |
| 2091 CONTIG16 | 386265 | 386529 | 1.34 | 1.44E-01 | transcription_start_site | + | 390102 | 390102 | -3705 | 8431 AN1173 |
| 2091 CONTIG16 | 386265 | 386529 | 1.34 | 1.44E-01 | transcription_start_site | + | 390168 | 390168 | -3771 | 8432 AN1173 |
| 2091 CONTIG16 | 386265 | 386529 | 1.34 | 1.44E-01 | transcription_start_site | + | 391173 | 391173 | -4776 | 8433 AN1173 |
| 1238 CONTIG16 | 397516 | 398093 | 1.74 | 4.36E-02 | transcription_start_site | - | 396986 | 396986 | -818  | 8434 AN1174 |
| 1238 CONTIG16 | 397516 | 398093 | 1.74 | 4.36E-02 | transcription_start_site | - | 395885 | 395885 | -1919 | 8435 AN1174 |
| 1238 CONTIG16 | 397516 | 398093 | 1.74 | 4.36E-02 | transcription_start_site | - | 395742 | 395742 | -2062 | 8436 AN1174 |
| 1238 CONTIG16 | 397516 | 398093 | 1.74 | 4.36E-02 | transcription_start_site | - | 395204 | 395204 | -2600 | 8437 AN1174 |
| 1238 CONTIG16 | 397516 | 398093 | 1.74 | 4.36E-02 | transcription_start_site | - | 395076 | 395076 | -2728 | 8438 AN1174 |
| 1238 CONTIG16 | 397516 | 398093 | 1.74 | 4.36E-02 | transcription_start_site | - | 394969 | 394969 | -2835 | 8439 AN1174 |
| 1238 CONTIG16 | 397516 | 398093 | 1.74 | 4.36E-02 | transcription_start_site | - | 394733 | 394733 | -3071 | 8440 AN1174 |
| 1238 CONTIG16 | 397516 | 398093 | 1.74 | 4.36E-02 | transcription_start_site | - | 393257 | 393257 | -4547 | 8441 AN1174 |
| 1238 CONTIG16 | 397516 | 398093 | 1.74 | 4.36E-02 | transcription_start_site | - | 392802 | 392802 | -5002 | 8442 AN1174 |
| 1238 CONTIG16 | 397516 | 398093 | 1.74 | 4.36E-02 | transcription_start_site | + | 398927 | 398927 | -1122 | 8444 AN1175 |
| 1238 CONTIG16 | 397516 | 398093 | 1.74 | 4.36E-02 | transcription_start_site | + | 399026 | 399026 | -1221 | 8445 AN1175 |
| 1238 CONTIG16 | 397516 | 398093 | 1.74 | 4.36E-02 | transcription_start_site | + | 399195 | 399195 | -1390 | 8446 AN1175 |
| 1838 CONTIG16 | 407178 | 407542 | 1.44 | 1.08E-01 | transcription_start_site | - | 405791 | 405791 | -1569 | 8450 AN1177 |
| 1838 CONTIG16 | 407178 | 407542 | 1.44 | 1.08E-01 | transcription_start_site | - | 405421 | 405421 | -1939 | 8451 AN1177 |
| 1838 CONTIG16 | 407178 | 407542 | 1.44 | 1.08E-01 | transcription_start_site | - | 404951 | 404951 | -2409 | 8452 AN1177 |
| 1838 CONTIG16 | 407178 | 407542 | 1.44 | 1.08E-01 | transcription_start_site | - | 404514 | 404514 | -2846 | 8453 AN1177 |
| 1838 CONTIG16 | 407178 | 407542 | 1.44 | 1.08E-01 | transcription_start_site | - | 402864 | 402864 | -4496 | 8454 AN1177 |
| 1838 CONTIG16 | 407178 | 407542 | 1.44 | 1.08E-01 | transcription_start_site | + | 406983 | 406983 | 377   | 8461 AN1178 |
| 1838 CONTIG16 | 407178 | 407542 | 1.44 | 1.08E-01 | transcription_start_site | + | 406802 | 406802 | 558   | 8460 AN1178 |
| 1838 CONTIG16 | 407178 | 407542 | 1.44 | 1.08E-01 | transcription_start_site | + | 406664 | 406664 | 696   | 8459 AN1178 |
| 1838 CONTIG16 | 407178 | 407542 | 1.44 | 1.08E-01 | transcription_start_site | + | 406548 | 406548 | 812   | 8458 AN1178 |
| 1838 CONTIG16 | 407178 | 407542 | 1.44 | 1.08E-01 | transcription_start_site | + | 406397 | 406397 | 963   | 8457 AN1178 |
| 1838 CONTIG16 | 407178 | 407542 | 1.44 | 1.08E-01 | transcription_start_site | + | 406308 | 406308 | 1052  | 8456 AN1178 |
| 1838 CONTIG16 | 407178 | 407542 | 1.44 | 1.08E-01 | transcription_start_site | + | 406216 | 406216 | 1144  | 8455 AN1178 |
| 1838 CONTIG16 | 407178 | 407542 | 1.44 | 1.08E-01 | transcription_start_site | + | 407543 | 407543 | -183  | 8462 AN1179 |
| 1838 CONTIG16 | 407178 | 407542 | 1.44 | 1.08E-01 | transcription_start_site | + | 407993 | 407993 | -633  | 8463 AN1179 |
| 1838 CONTIG16 | 407178 | 407542 | 1.44 | 1.08E-01 | transcription_start_site | + | 408220 | 408220 | -860  | 8464 AN1179 |
| 1838 CONTIG16 | 407178 | 407542 | 1.44 | 1.08E-01 | transcription_start_site | + | 408628 | 408628 | -1268 | 8465 AN1179 |
| 1732 CONTIG16 | 431710 | 431994 | 1.49 | 9.24E-02 | transcription_start_site | + | 431161 | 431161 | 691   | 8486 AN1183 |
| 1732 CONTIG16 | 431710 | 431994 | 1.49 | 9.24E-02 | transcription_start_site | + | 430938 | 430938 | 914   | 8485 AN1183 |
| 1732 CONTIG16 | 431710 | 431994 | 1.49 | 9.24E-02 | transcription_start_site | + | 433878 | 433878 | -2026 | 8488 AN1185 |
| 1732 CONTIG16 | 431710 | 431994 | 1.49 | 9.24E-02 | transcription_start_site | + | 434079 | 434079 | -2227 | 8489 AN1185 |
| 1732 CONTIG16 | 431710 | 431994 | 1.49 | 9.24E-02 | transcription_start_site | + | 435148 | 435148 | -3296 | 8490 AN1185 |
| 1019 CONTIG16 | 449476 | 450219 | 1.89 | 0.00E+00 | transcription_start_site | - | 449162 | 449162 | -685  | 8504 AN1189 |
| 1019 CONTIG16 | 449476 | 450219 | 1.89 | 0.00E+00 | transcription_start_site | - | 446094 | 446094 | -3753 | 8505 AN1189 |
| 1019 CONTIG16 | 449476 | 450219 | 1.89 | 0.00E+00 | transcription_start_site | - | 445906 | 445906 | -3941 | 8506 AN1189 |
| 1019 CONTIG16 | 449476 | 450219 | 1.89 | 0.00E+00 | transcription_start_site | - | 445600 | 445600 | -4247 | 8507 AN1189 |
| 1618 CONTIG17 | 7811   | 8240   | 1.53 | 3.33E-02 | transcription_start_site | - | 4608   | 4608   | -3417 | 8508 AN1190 |
| 1618 CONTIG17 | 7811   | 8240   | 1.53 | 3.33E-02 | transcription_start_site | - | 4476   | 4476   | -3549 | 8509 AN1190 |
| 1618 CONTIG17 | 7811   | 8240   | 1.53 | 3.33E-02 | transcription_start_site | - | 4205   | 4205   | -3820 | 8510 AN1190 |
| 2587 CONTIG17 | 5251   | 5691   | 1.17 | 1.50E-01 | transcription_start_site | - | 4608   | 4608   | -863  | 8508 AN1190 |
| 2587 CONTIG17 | 5251   | 5691   | 1.17 | 1.50E-01 | transcription_start_site | - | 4476   | 4476   | -995  | 8509 AN1190 |
| 2587 CONTIG17 | 5251   | 5691   | 1.17 | 1.50E-01 | transcription_start_site | - | 4205   | 4205   | -1266 | 8510 AN1190 |



|               |       |       |      |          |                          |   |       |       |       |             |
|---------------|-------|-------|------|----------|--------------------------|---|-------|-------|-------|-------------|
| 2587 CONTIG17 | 5251  | 5691  | 1.17 | 1.50E-01 | transcription_start_site | - | 2108  | 2108  | -3363 | 8511 AN1190 |
| 2587 CONTIG17 | 5251  | 5691  | 1.17 | 1.50E-01 | transcription_start_site | - | 1586  | 1586  | -3885 | 8512 AN1190 |
| 2587 CONTIG17 | 5251  | 5691  | 1.17 | 1.50E-01 | transcription_start_site | + | 6062  | 6062  | -591  | 8513 AN1191 |
| 2587 CONTIG17 | 5251  | 5691  | 1.17 | 1.50E-01 | transcription_start_site | + | 6382  | 6382  | -911  | 8514 AN1191 |
| 1618 CONTIG17 | 7811  | 8240  | 1.53 | 3.33E-02 | transcription_start_site | - | 7757  | 7757  | -268  | 8515 AN1192 |
| 1618 CONTIG17 | 7811  | 8240  | 1.53 | 3.33E-02 | transcription_start_site | - | 7560  | 7560  | -465  | 8516 AN1192 |
| 1618 CONTIG17 | 7811  | 8240  | 1.53 | 3.33E-02 | transcription_start_site | + | 8657  | 8657  | -631  | 8517 AN1193 |
| 1618 CONTIG17 | 7811  | 8240  | 1.53 | 3.33E-02 | transcription_start_site | + | 8929  | 8929  | -903  | 8518 AN1193 |
| 1618 CONTIG17 | 7811  | 8240  | 1.53 | 3.33E-02 | transcription_start_site | + | 9092  | 9092  | -1066 | 8519 AN1193 |
| 1618 CONTIG17 | 7811  | 8240  | 1.53 | 3.33E-02 | transcription_start_site | + | 9288  | 9288  | -1262 | 8520 AN1193 |
| 1618 CONTIG17 | 7811  | 8240  | 1.53 | 3.33E-02 | transcription_start_site | + | 9715  | 9715  | -1689 | 8521 AN1193 |
| 1618 CONTIG17 | 7811  | 8240  | 1.53 | 3.33E-02 | transcription_start_site | + | 9959  | 9959  | -1933 | 8522 AN1193 |
| 1618 CONTIG17 | 7811  | 8240  | 1.53 | 3.33E-02 | transcription_start_site | + | 10640 | 10640 | -2614 | 8523 AN1193 |
| 1618 CONTIG17 | 7811  | 8240  | 1.53 | 3.33E-02 | transcription_start_site | + | 10728 | 10728 | -2702 | 8524 AN1193 |
| 1618 CONTIG17 | 7811  | 8240  | 1.53 | 3.33E-02 | transcription_start_site | + | 11105 | 11105 | -3079 | 8525 AN1193 |
| 2587 CONTIG17 | 5251  | 5691  | 1.17 | 1.50E-01 | transcription_start_site | + | 8657  | 8657  | -3186 | 8517 AN1193 |
| 2587 CONTIG17 | 5251  | 5691  | 1.17 | 1.50E-01 | transcription_start_site | + | 8929  | 8929  | -3458 | 8518 AN1193 |
| 2587 CONTIG17 | 5251  | 5691  | 1.17 | 1.50E-01 | transcription_start_site | + | 9092  | 9092  | -3621 | 8519 AN1193 |
| 2587 CONTIG17 | 5251  | 5691  | 1.17 | 1.50E-01 | transcription_start_site | + | 9288  | 9288  | -3817 | 8520 AN1193 |
| 2587 CONTIG17 | 5251  | 5691  | 1.17 | 1.50E-01 | transcription_start_site | + | 9715  | 9715  | -4244 | 8521 AN1193 |
| 2587 CONTIG17 | 5251  | 5691  | 1.17 | 1.50E-01 | transcription_start_site | + | 9959  | 9959  | -4488 | 8522 AN1193 |
| 2587 CONTIG17 | 5251  | 5691  | 1.17 | 1.50E-01 | transcription_start_site | + | 10640 | 10640 | -5169 | 8523 AN1193 |
| 1751 CONTIG17 | 15463 | 15744 | 1.48 | 5.88E-02 | transcription_start_site | - | 12117 | 12117 | -3486 | 8526 AN1194 |
| 1751 CONTIG17 | 15463 | 15744 | 1.48 | 5.88E-02 | transcription_start_site | - | 12050 | 12050 | -3553 | 8527 AN1194 |
| 1751 CONTIG17 | 15463 | 15744 | 1.48 | 5.88E-02 | transcription_start_site | - | 13890 | 13890 | -1713 | 8528 AN1195 |
| 1751 CONTIG17 | 15463 | 15744 | 1.48 | 5.88E-02 | transcription_start_site | - | 13532 | 13532 | -2071 | 8529 AN1195 |
| 1751 CONTIG17 | 15463 | 15744 | 1.48 | 5.88E-02 | transcription_start_site | - | 13391 | 13391 | -2212 | 8530 AN1195 |
| 1751 CONTIG17 | 15463 | 15744 | 1.48 | 5.88E-02 | transcription_start_site | - | 13252 | 13252 | -2351 | 8531 AN1195 |
| 1751 CONTIG17 | 15463 | 15744 | 1.48 | 5.88E-02 | transcription_start_site | - | 12713 | 12713 | -2890 | 8532 AN1195 |
| 1751 CONTIG17 | 15463 | 15744 | 1.48 | 5.88E-02 | transcription_start_site | - | 15316 | 15316 | -287  | 8533 AN1196 |
| 1751 CONTIG17 | 15463 | 15744 | 1.48 | 5.88E-02 | transcription_start_site | - | 15126 | 15126 | -477  | 8534 AN1196 |
| 1751 CONTIG17 | 15463 | 15744 | 1.48 | 5.88E-02 | transcription_start_site | + | 16525 | 16525 | -921  | 8535 AN1197 |
| 1751 CONTIG17 | 15463 | 15744 | 1.48 | 5.88E-02 | transcription_start_site | + | 16704 | 16704 | -1100 | 8536 AN1197 |
| 1751 CONTIG17 | 15463 | 15744 | 1.48 | 5.88E-02 | transcription_start_site | + | 17392 | 17392 | -1788 | 8537 AN1197 |
| 1751 CONTIG17 | 15463 | 15744 | 1.48 | 5.88E-02 | transcription_start_site | + | 17759 | 17759 | -2155 | 8538 AN1197 |
| 1751 CONTIG17 | 15463 | 15744 | 1.48 | 5.88E-02 | transcription_start_site | + | 17953 | 17953 | -2349 | 8539 AN1197 |
| 1751 CONTIG17 | 15463 | 15744 | 1.48 | 5.88E-02 | transcription_start_site | + | 18451 | 18451 | -2847 | 8540 AN1197 |
| 1751 CONTIG17 | 15463 | 15744 | 1.48 | 5.88E-02 | transcription_start_site | + | 18597 | 18597 | -2993 | 8541 AN1197 |
| 97 CONTIG17   | 24978 | 25786 | 3.23 | 0.00E+00 | transcription_start_site | - | 21889 | 21889 | -3493 | 8542 AN1198 |
| 97 CONTIG17   | 24978 | 25786 | 3.23 | 0.00E+00 | transcription_start_site | - | 21458 | 21458 | -3924 | 8543 AN1198 |
| 97 CONTIG17   | 24978 | 25786 | 3.23 | 0.00E+00 | transcription_start_site | - | 24240 | 24240 | -1142 | 8544 AN1199 |
| 97 CONTIG17   | 24978 | 25786 | 3.23 | 0.00E+00 | transcription_start_site | - | 23948 | 23948 | -1434 | 8545 AN1199 |
| 97 CONTIG17   | 24978 | 25786 | 3.23 | 0.00E+00 | transcription_start_site | - | 23746 | 23746 | -1636 | 8546 AN1199 |
| 97 CONTIG17   | 24978 | 25786 | 3.23 | 0.00E+00 | transcription_start_site | - | 23572 | 23572 | -1810 | 8547 AN1199 |
| 97 CONTIG17   | 24978 | 25786 | 3.23 | 0.00E+00 | transcription_start_site | - | 22571 | 22571 | -2811 | 8548 AN1199 |
| 97 CONTIG17   | 24978 | 25786 | 3.23 | 0.00E+00 | transcription_start_site | - | 26675 | 26675 | 1293  | 8552 AN1200 |
| 97 CONTIG17   | 24978 | 25786 | 3.23 | 0.00E+00 | transcription_start_site | + | 30542 | 30542 | -5160 | 8553 AN1201 |
| 1752 CONTIG17 | 44185 | 44454 | 1.48 | 5.88E-02 | transcription_start_site | - | 39513 | 39513 | -4806 | 8556 AN1203 |
| 1752 CONTIG17 | 44185 | 44454 | 1.48 | 5.88E-02 | transcription_start_site | - | 39257 | 39257 | -5062 | 8557 AN1203 |
| 1752 CONTIG17 | 44185 | 44454 | 1.48 | 5.88E-02 | transcription_start_site | - | 42181 | 42181 | -2138 | 8559 AN1204 |
| 1752 CONTIG17 | 44185 | 44454 | 1.48 | 5.88E-02 | transcription_start_site | - | 42067 | 42067 | -2252 | 8560 AN1204 |
| 1752 CONTIG17 | 44185 | 44454 | 1.48 | 5.88E-02 | transcription_start_site | - | 41893 | 41893 | -2426 | 8561 AN1204 |
| 1752 CONTIG17 | 44185 | 44454 | 1.48 | 5.88E-02 | transcription_start_site | + | 44297 | 44297 | 22    | 8562 AN1205 |
| 1752 CONTIG17 | 44185 | 44454 | 1.48 | 5.88E-02 | transcription_start_site | + | 44427 | 44427 | -107  | 8563 AN1205 |
| 1752 CONTIG17 | 44185 | 44454 | 1.48 | 5.88E-02 | transcription_start_site | + | 44774 | 44774 | -454  | 8564 AN1205 |
| 1752 CONTIG17 | 44185 | 44454 | 1.48 | 5.88E-02 | transcription_start_site | + | 44948 | 44948 | -628  | 8565 AN1205 |
| 2488 CONTIG17 | 49880 | 50154 | 1.21 | 1.44E-01 | transcription_start_site | - | 46851 | 46851 | -3166 | 8566 AN1206 |

|      |          |        |        |      |          |                          |   |        |        |       |      |        |
|------|----------|--------|--------|------|----------|--------------------------|---|--------|--------|-------|------|--------|
| 2488 | CONTIG17 | 49880  | 50154  | 1.21 | 1.44E-01 | transcription_start_site | - | 46043  | 46043  | -3974 | 8567 | AN1206 |
| 2488 | CONTIG17 | 49880  | 50154  | 1.21 | 1.44E-01 | transcription_start_site | - | 45868  | 45868  | -4149 | 8568 | AN1206 |
| 2488 | CONTIG17 | 49880  | 50154  | 1.21 | 1.44E-01 | transcription_start_site | - | 45476  | 45476  | -4541 | 8569 | AN1206 |
| 1752 | CONTIG17 | 44185  | 44454  | 1.48 | 5.88E-02 | transcription_start_site | + | 48070  | 48070  | -3750 | 8570 | AN1207 |
| 1752 | CONTIG17 | 44185  | 44454  | 1.48 | 5.88E-02 | transcription_start_site | + | 48916  | 48916  | -4596 | 8571 | AN1207 |
| 1752 | CONTIG17 | 44185  | 44454  | 1.48 | 5.88E-02 | transcription_start_site | + | 49095  | 49095  | -4775 | 8572 | AN1207 |
| 2488 | CONTIG17 | 49880  | 50154  | 1.21 | 1.44E-01 | transcription_start_site | + | 49095  | 49095  | 922   | 8572 | AN1207 |
| 2488 | CONTIG17 | 49880  | 50154  | 1.21 | 1.44E-01 | transcription_start_site | + | 48916  | 48916  | 1101  | 8571 | AN1207 |
| 2488 | CONTIG17 | 49880  | 50154  | 1.21 | 1.44E-01 | transcription_start_site | + | 52597  | 52597  | -2580 | 8574 | AN1209 |
| 2488 | CONTIG17 | 49880  | 50154  | 1.21 | 1.44E-01 | transcription_start_site | + | 52713  | 52713  | -2696 | 8575 | AN1209 |
| 2488 | CONTIG17 | 49880  | 50154  | 1.21 | 1.44E-01 | transcription_start_site | + | 52804  | 52804  | -2787 | 8576 | AN1209 |
| 2488 | CONTIG17 | 49880  | 50154  | 1.21 | 1.44E-01 | transcription_start_site | + | 52997  | 52997  | -2980 | 8577 | AN1209 |
| 2488 | CONTIG17 | 49880  | 50154  | 1.21 | 1.44E-01 | transcription_start_site | + | 53177  | 53177  | -3160 | 8578 | AN1209 |
| 2488 | CONTIG17 | 49880  | 50154  | 1.21 | 1.44E-01 | transcription_start_site | + | 53557  | 53557  | -3540 | 8579 | AN1209 |
| 1038 | CONTIG17 | 62629  | 63128  | 1.88 | 5.41E-03 | transcription_start_site | + | 63126  | 63126  | -247  | 8591 | AN1213 |
| 1038 | CONTIG17 | 62629  | 63128  | 1.88 | 5.41E-03 | transcription_start_site | + | 62468  | 62468  | 410   | 8590 | AN1213 |
| 1038 | CONTIG17 | 62629  | 63128  | 1.88 | 5.41E-03 | transcription_start_site | + | 64106  | 64106  | -1227 | 8592 | AN1213 |
| 1038 | CONTIG17 | 62629  | 63128  | 1.88 | 5.41E-03 | transcription_start_site | + | 65691  | 65691  | -2812 | 8593 | AN1213 |
| 1038 | CONTIG17 | 62629  | 63128  | 1.88 | 5.41E-03 | transcription_start_site | + | 66546  | 66546  | -3667 | 8594 | AN1214 |
| 1038 | CONTIG17 | 62629  | 63128  | 1.88 | 5.41E-03 | transcription_start_site | + | 66707  | 66707  | -3828 | 8595 | AN1214 |
| 1038 | CONTIG17 | 62629  | 63128  | 1.88 | 5.41E-03 | transcription_start_site | + | 67379  | 67379  | -4500 | 8596 | AN1214 |
| 1038 | CONTIG17 | 62629  | 63128  | 1.88 | 5.41E-03 | transcription_start_site | + | 67459  | 67459  | -4580 | 8597 | AN1214 |
| 652  | CONTIG17 | 75169  | 75509  | 2.24 | 3.03E-03 | transcription_start_site | + | 76910  | 76910  | -1571 | 8605 | AN1217 |
| 652  | CONTIG17 | 75169  | 75509  | 2.24 | 3.03E-03 | transcription_start_site | + | 77210  | 77210  | -1871 | 8606 | AN1217 |
| 652  | CONTIG17 | 75169  | 75509  | 2.24 | 3.03E-03 | transcription_start_site | + | 78202  | 78202  | -2863 | 8607 | AN1217 |
| 1138 | CONTIG17 | 77942  | 78366  | 1.8  | 1.84E-02 | transcription_start_site | + | 78202  | 78202  | -48   | 8607 | AN1217 |
| 1138 | CONTIG17 | 77942  | 78366  | 1.8  | 1.84E-02 | transcription_start_site | + | 77210  | 77210  | 944   | 8606 | AN1217 |
| 652  | CONTIG17 | 75169  | 75509  | 2.24 | 3.03E-03 | transcription_start_site | + | 79310  | 79310  | -3971 | 8608 | AN1218 |
| 652  | CONTIG17 | 75169  | 75509  | 2.24 | 3.03E-03 | transcription_start_site | + | 79537  | 79537  | -4198 | 8609 | AN1218 |
| 652  | CONTIG17 | 75169  | 75509  | 2.24 | 3.03E-03 | transcription_start_site | + | 79872  | 79872  | -4533 | 8610 | AN1218 |
| 1138 | CONTIG17 | 77942  | 78366  | 1.8  | 1.84E-02 | transcription_start_site | + | 79310  | 79310  | -1156 | 8608 | AN1218 |
| 1138 | CONTIG17 | 77942  | 78366  | 1.8  | 1.84E-02 | transcription_start_site | + | 79537  | 79537  | -1383 | 8609 | AN1218 |
| 1138 | CONTIG17 | 77942  | 78366  | 1.8  | 1.84E-02 | transcription_start_site | + | 79872  | 79872  | -1718 | 8610 | AN1218 |
| 237  | CONTIG17 | 82958  | 84427  | 2.87 | 0.00E+00 | transcription_start_site | - | 83703  | 83703  | 10    | 8611 | AN1219 |
| 237  | CONTIG17 | 82958  | 84427  | 2.87 | 0.00E+00 | transcription_start_site | - | 83432  | 83432  | -260  | 8612 | AN1219 |
| 237  | CONTIG17 | 82958  | 84427  | 2.87 | 0.00E+00 | transcription_start_site | - | 83168  | 83168  | -524  | 8613 | AN1219 |
| 98   | CONTIG17 | 90542  | 90881  | 3.23 | 0.00E+00 | transcription_start_site | + | 91114  | 91114  | -402  | 8614 | AN1220 |
| 167  | CONTIG17 | 89262  | 89691  | 3.01 | 0.00E+00 | transcription_start_site | + | 91114  | 91114  | -1637 | 8614 | AN1220 |
| 2489 | CONTIG17 | 97142  | 97626  | 1.21 | 1.44E-01 | transcription_start_site | - | 96134  | 96134  | -1250 | 8615 | AN1221 |
| 2489 | CONTIG17 | 97142  | 97626  | 1.21 | 1.44E-01 | transcription_start_site | - | 95935  | 95935  | -1449 | 8616 | AN1221 |
| 2489 | CONTIG17 | 97142  | 97626  | 1.21 | 1.44E-01 | transcription_start_site | - | 95168  | 95168  | -2216 | 8617 | AN1221 |
| 2489 | CONTIG17 | 97142  | 97626  | 1.21 | 1.44E-01 | transcription_start_site | - | 97901  | 97901  | 517   | 8620 | AN1222 |
| 2489 | CONTIG17 | 97142  | 97626  | 1.21 | 1.44E-01 | transcription_start_site | - | 98014  | 98014  | 630   | 8619 | AN1222 |
| 2489 | CONTIG17 | 97142  | 97626  | 1.21 | 1.44E-01 | transcription_start_site | - | 98178  | 98178  | 794   | 8618 | AN1222 |
| 2489 | CONTIG17 | 97142  | 97626  | 1.21 | 1.44E-01 | transcription_start_site | + | 98735  | 98735  | -1351 | 8621 | AN1223 |
| 2489 | CONTIG17 | 97142  | 97626  | 1.21 | 1.44E-01 | transcription_start_site | + | 99479  | 99479  | -2095 | 8622 | AN1223 |
| 2592 | CONTIG17 | 93527  | 93816  | 1.17 | 1.66E-01 | transcription_start_site | + | 98735  | 98735  | -5063 | 8621 | AN1223 |
| 2490 | CONTIG17 | 107851 | 108212 | 1.21 | 1.44E-01 | transcription_start_site | - | 108143 | 108143 | 111   | 8628 | AN1226 |
| 2490 | CONTIG17 | 107851 | 108212 | 1.21 | 1.44E-01 | transcription_start_site | - | 107652 | 107652 | -379  | 8629 | AN1226 |
| 2490 | CONTIG17 | 107851 | 108212 | 1.21 | 1.44E-01 | transcription_start_site | + | 109535 | 109535 | -1503 | 8630 | AN1227 |
| 2490 | CONTIG17 | 107851 | 108212 | 1.21 | 1.44E-01 | transcription_start_site | + | 109736 | 109736 | -1704 | 8631 | AN1227 |
| 2490 | CONTIG17 | 107851 | 108212 | 1.21 | 1.44E-01 | transcription_start_site | + | 110252 | 110252 | -2220 | 8632 | AN1227 |
| 2490 | CONTIG17 | 107851 | 108212 | 1.21 | 1.44E-01 | transcription_start_site | + | 110903 | 110903 | -2871 | 8633 | AN1227 |
| 2490 | CONTIG17 | 107851 | 108212 | 1.21 | 1.44E-01 | transcription_start_site | + | 111170 | 111170 | -3138 | 8634 | AN1227 |
| 2490 | CONTIG17 | 107851 | 108212 | 1.21 | 1.44E-01 | transcription_start_site | + | 111341 | 111341 | -3309 | 8635 | AN1227 |
| 2490 | CONTIG17 | 107851 | 108212 | 1.21 | 1.44E-01 | transcription_start_site | + | 111500 | 111500 | -3468 | 8636 | AN1227 |
| 2490 | CONTIG17 | 107851 | 108212 | 1.21 | 1.44E-01 | transcription_start_site | + | 111913 | 111913 | -3881 | 8637 | AN1227 |

|      |          |        |        |      |          |                          |   |        |        |       |      |        |
|------|----------|--------|--------|------|----------|--------------------------|---|--------|--------|-------|------|--------|
| 2490 | CONTIG17 | 107851 | 108212 | 1.21 | 1.44E-01 | transcription_start_site | + | 112008 | 112008 | -3976 | 8638 | AN1227 |
| 2334 | CONTIG17 | 114226 | 114510 | 1.26 | 1.25E-01 | transcription_start_site | - | 114181 | 114181 | -187  | 8639 | AN1228 |
| 2334 | CONTIG17 | 114226 | 114510 | 1.26 | 1.25E-01 | transcription_start_site | - | 114107 | 114107 | -261  | 8640 | AN1228 |
| 2334 | CONTIG17 | 114226 | 114510 | 1.26 | 1.25E-01 | transcription_start_site | - | 113638 | 113638 | -730  | 8641 | AN1228 |
| 2334 | CONTIG17 | 114226 | 114510 | 1.26 | 1.25E-01 | transcription_start_site | - | 113319 | 113319 | -1049 | 8642 | AN1228 |
| 2334 | CONTIG17 | 114226 | 114510 | 1.26 | 1.25E-01 | transcription_start_site | + | 114536 | 114536 | -168  | 8643 | AN1229 |
| 2334 | CONTIG17 | 114226 | 114510 | 1.26 | 1.25E-01 | transcription_start_site | + | 114676 | 114676 | -308  | 8644 | AN1229 |
| 2334 | CONTIG17 | 114226 | 114510 | 1.26 | 1.25E-01 | transcription_start_site | + | 114840 | 114840 | -472  | 8645 | AN1229 |
| 2334 | CONTIG17 | 114226 | 114510 | 1.26 | 1.25E-01 | transcription_start_site | + | 115179 | 115179 | -811  | 8646 | AN1229 |
| 2334 | CONTIG17 | 114226 | 114510 | 1.26 | 1.25E-01 | transcription_start_site | + | 117176 | 117176 | -2808 | 8649 | AN1231 |
| 2334 | CONTIG17 | 114226 | 114510 | 1.26 | 1.25E-01 | transcription_start_site | + | 117395 | 117395 | -3027 | 8650 | AN1231 |
| 2334 | CONTIG17 | 114226 | 114510 | 1.26 | 1.25E-01 | transcription_start_site | + | 117635 | 117635 | -3267 | 8651 | AN1231 |
| 2334 | CONTIG17 | 114226 | 114510 | 1.26 | 1.25E-01 | transcription_start_site | + | 118061 | 118061 | -3693 | 8652 | AN1231 |
| 2197 | CONTIG17 | 173564 | 173918 | 1.3  | 1.08E-01 | transcription_start_site | - | 173576 | 173576 | -165  | 8705 | AN1243 |
| 2197 | CONTIG17 | 173564 | 173918 | 1.3  | 1.08E-01 | transcription_start_site | - | 173123 | 173123 | -618  | 8706 | AN1243 |
| 2197 | CONTIG17 | 173564 | 173918 | 1.3  | 1.08E-01 | transcription_start_site | - | 173040 | 173040 | -701  | 8707 | AN1243 |
| 2197 | CONTIG17 | 173564 | 173918 | 1.3  | 1.08E-01 | transcription_start_site | - | 172884 | 172884 | -857  | 8708 | AN1243 |
| 2197 | CONTIG17 | 173564 | 173918 | 1.3  | 1.08E-01 | transcription_start_site | - | 172492 | 172492 | -1249 | 8709 | AN1243 |
| 1044 | CONTIG17 | 180754 | 181107 | 1.88 | 1.30E-02 | transcription_start_site | - | 176432 | 176432 | -4498 | 8710 | AN1244 |
| 1044 | CONTIG17 | 180754 | 181107 | 1.88 | 1.30E-02 | transcription_start_site | - | 176333 | 176333 | -4597 | 8711 | AN1244 |
| 2197 | CONTIG17 | 173564 | 173918 | 1.3  | 1.08E-01 | transcription_start_site | + | 178059 | 178059 | -4318 | 8713 | AN1245 |
| 2197 | CONTIG17 | 173564 | 173918 | 1.3  | 1.08E-01 | transcription_start_site | + | 178300 | 178300 | -4559 | 8714 | AN1245 |
| 2197 | CONTIG17 | 173564 | 173918 | 1.3  | 1.08E-01 | transcription_start_site | + | 178571 | 178571 | -4830 | 8715 | AN1245 |
| 1044 | CONTIG17 | 180754 | 181107 | 1.88 | 1.30E-02 | transcription_start_site | - | 180603 | 180603 | -327  | 8716 | AN1246 |
| 1044 | CONTIG17 | 180754 | 181107 | 1.88 | 1.30E-02 | transcription_start_site | - | 180480 | 180480 | -450  | 8717 | AN1246 |
| 1044 | CONTIG17 | 180754 | 181107 | 1.88 | 1.30E-02 | transcription_start_site | - | 179996 | 179996 | -934  | 8718 | AN1246 |
| 1044 | CONTIG17 | 180754 | 181107 | 1.88 | 1.30E-02 | transcription_start_site | - | 181532 | 181532 | 601   | 8723 | AN1247 |
| 1044 | CONTIG17 | 180754 | 181107 | 1.88 | 1.30E-02 | transcription_start_site | - | 181752 | 181752 | 821   | 8722 | AN1247 |
| 1044 | CONTIG17 | 180754 | 181107 | 1.88 | 1.30E-02 | transcription_start_site | + | 185699 | 185699 | -4768 | 8730 | AN1249 |
| 1044 | CONTIG17 | 180754 | 181107 | 1.88 | 1.30E-02 | transcription_start_site | + | 185901 | 185901 | -4970 | 8731 | AN1249 |
| 932  | CONTIG17 | 194490 | 195125 | 1.97 | 1.17E-03 | transcription_start_site | - | 191241 | 191241 | -3566 | 8733 | AN1250 |
| 932  | CONTIG17 | 194490 | 195125 | 1.97 | 1.17E-03 | transcription_start_site | - | 190868 | 190868 | -3939 | 8734 | AN1250 |
| 1039 | CONTIG17 | 191044 | 191995 | 1.88 | 5.41E-03 | transcription_start_site | - | 191241 | 191241 | -278  | 8733 | AN1250 |
| 1039 | CONTIG17 | 191044 | 191995 | 1.88 | 5.41E-03 | transcription_start_site | - | 190868 | 190868 | -651  | 8734 | AN1250 |
| 2593 | CONTIG17 | 190444 | 191013 | 1.17 | 1.66E-01 | transcription_start_site | - | 190868 | 190868 | 139   | 8734 | AN1250 |
| 2593 | CONTIG17 | 190444 | 191013 | 1.17 | 1.66E-01 | transcription_start_site | - | 191241 | 191241 | 512   | 8733 | AN1250 |
| 932  | CONTIG17 | 194490 | 195125 | 1.97 | 1.17E-03 | transcription_start_site | - | 193333 | 193333 | -1474 | 8735 | AN1251 |
| 1215 | CONTIG17 | 197196 | 197624 | 1.75 | 2.12E-02 | transcription_start_site | - | 193333 | 193333 | -4077 | 8735 | AN1251 |
| 1753 | CONTIG17 | 202746 | 203000 | 1.48 | 5.88E-02 | transcription_start_site | - | 199950 | 199950 | -2923 | 8736 | AN1252 |
| 1215 | CONTIG17 | 197196 | 197624 | 1.75 | 2.12E-02 | transcription_start_site | + | 200955 | 200955 | -3545 | 8737 | AN1253 |
| 1215 | CONTIG17 | 197196 | 197624 | 1.75 | 2.12E-02 | transcription_start_site | + | 201195 | 201195 | -3785 | 8738 | AN1253 |
| 1753 | CONTIG17 | 202746 | 203000 | 1.48 | 5.88E-02 | transcription_start_site | + | 202804 | 202804 | 69    | 8739 | AN1254 |
| 1753 | CONTIG17 | 202746 | 203000 | 1.48 | 5.88E-02 | transcription_start_site | + | 203420 | 203420 | -547  | 8740 | AN1254 |
| 976  | CONTIG17 | 213992 | 214342 | 1.93 | 1.11E-02 | transcription_start_site | - | 209538 | 209538 | -4629 | 8741 | AN1255 |
| 1620 | CONTIG17 | 210092 | 210366 | 1.53 | 5.22E-02 | transcription_start_site | - | 209538 | 209538 | -691  | 8741 | AN1255 |
| 976  | CONTIG17 | 213992 | 214342 | 1.93 | 1.11E-02 | transcription_start_site | + | 213013 | 213013 | 1154  | 8748 | AN1256 |
| 1620 | CONTIG17 | 210092 | 210366 | 1.53 | 5.22E-02 | transcription_start_site | + | 211151 | 211151 | -922  | 8743 | AN1256 |
| 1620 | CONTIG17 | 210092 | 210366 | 1.53 | 5.22E-02 | transcription_start_site | + | 211366 | 211366 | -1137 | 8744 | AN1256 |
| 1620 | CONTIG17 | 210092 | 210366 | 1.53 | 5.22E-02 | transcription_start_site | + | 211578 | 211578 | -1349 | 8745 | AN1256 |
| 1620 | CONTIG17 | 210092 | 210366 | 1.53 | 5.22E-02 | transcription_start_site | + | 211726 | 211726 | -1497 | 8746 | AN1256 |
| 1620 | CONTIG17 | 210092 | 210366 | 1.53 | 5.22E-02 | transcription_start_site | + | 212859 | 212859 | -2630 | 8747 | AN1256 |
| 1620 | CONTIG17 | 210092 | 210366 | 1.53 | 5.22E-02 | transcription_start_site | + | 213013 | 213013 | -2784 | 8748 | AN1256 |
| 976  | CONTIG17 | 213992 | 214342 | 1.93 | 1.11E-02 | transcription_start_site | - | 214923 | 214923 | 756   | 8751 | AN1257 |
| 2335 | CONTIG17 | 219392 | 219738 | 1.26 | 1.25E-01 | transcription_start_site | - | 215541 | 215541 | -4024 | 8749 | AN1257 |
| 2335 | CONTIG17 | 219392 | 219738 | 1.26 | 1.25E-01 | transcription_start_site | - | 215418 | 215418 | -4147 | 8750 | AN1257 |
| 2335 | CONTIG17 | 219392 | 219738 | 1.26 | 1.25E-01 | transcription_start_site | - | 214923 | 214923 | -4642 | 8751 | AN1257 |
| 2335 | CONTIG17 | 219392 | 219738 | 1.26 | 1.25E-01 | transcription_start_site | - | 218625 | 218625 | -940  | 8752 | AN1258 |

|      |          |        |        |      |          |                          |   |        |        |       |      |        |
|------|----------|--------|--------|------|----------|--------------------------|---|--------|--------|-------|------|--------|
| 2335 | CONTIG17 | 219392 | 219738 | 1.26 | 1.25E-01 | transcription_start_site | - | 220401 | 220401 | 836   | 8754 | AN1259 |
| 2335 | CONTIG17 | 219392 | 219738 | 1.26 | 1.25E-01 | transcription_start_site | + | 222461 | 222461 | -2896 | 8755 | AN1260 |
| 2335 | CONTIG17 | 219392 | 219738 | 1.26 | 1.25E-01 | transcription_start_site | + | 224717 | 224717 | -5152 | 8756 | AN1261 |
| 587  | CONTIG17 | 243153 | 243510 | 2.33 | 1.80E-03 | transcription_start_site | - | 240463 | 240463 | -2868 | 8774 | AN1266 |
| 587  | CONTIG17 | 243153 | 243510 | 2.33 | 1.80E-03 | transcription_start_site | - | 240257 | 240257 | -3074 | 8775 | AN1266 |
| 587  | CONTIG17 | 243153 | 243510 | 2.33 | 1.80E-03 | transcription_start_site | - | 239882 | 239882 | -3449 | 8776 | AN1266 |
| 587  | CONTIG17 | 243153 | 243510 | 2.33 | 1.80E-03 | transcription_start_site | - | 239410 | 239410 | -3921 | 8777 | AN1266 |
| 587  | CONTIG17 | 243153 | 243510 | 2.33 | 1.80E-03 | transcription_start_site | + | 244338 | 244338 | -1006 | 8782 | AN1268 |
| 587  | CONTIG17 | 243153 | 243510 | 2.33 | 1.80E-03 | transcription_start_site | + | 244632 | 244632 | -1300 | 8783 | AN1268 |
| 587  | CONTIG17 | 243153 | 243510 | 2.33 | 1.80E-03 | transcription_start_site | + | 245409 | 245409 | -2077 | 8784 | AN1268 |
| 1754 | CONTIG17 | 247132 | 247416 | 1.48 | 5.88E-02 | transcription_start_site | + | 248511 | 248511 | -1237 | 8785 | AN1268 |
| 1754 | CONTIG17 | 247132 | 247416 | 1.48 | 5.88E-02 | transcription_start_site | + | 248688 | 248688 | -1414 | 8786 | AN1268 |
| 1947 | CONTIG17 | 246232 | 246506 | 1.39 | 8.01E-02 | transcription_start_site | + | 245409 | 245409 | 960   | 8784 | AN1268 |
| 1947 | CONTIG17 | 246232 | 246506 | 1.39 | 8.01E-02 | transcription_start_site | + | 248511 | 248511 | -2142 | 8785 | AN1268 |
| 1947 | CONTIG17 | 246232 | 246506 | 1.39 | 8.01E-02 | transcription_start_site | + | 248688 | 248688 | -2319 | 8786 | AN1268 |
| 2491 | CONTIG17 | 245477 | 245751 | 1.21 | 1.44E-01 | transcription_start_site | + | 245409 | 245409 | 205   | 8784 | AN1268 |
| 2491 | CONTIG17 | 245477 | 245751 | 1.21 | 1.44E-01 | transcription_start_site | + | 244632 | 244632 | 982   | 8783 | AN1268 |
| 2491 | CONTIG17 | 245477 | 245751 | 1.21 | 1.44E-01 | transcription_start_site | + | 248511 | 248511 | -2897 | 8785 | AN1268 |
| 2491 | CONTIG17 | 245477 | 245751 | 1.21 | 1.44E-01 | transcription_start_site | + | 248688 | 248688 | -3074 | 8786 | AN1268 |
| 2589 | CONTIG17 | 249377 | 249816 | 1.17 | 1.50E-01 | transcription_start_site | + | 248688 | 248688 | 908   | 8786 | AN1268 |
| 2589 | CONTIG17 | 249377 | 249816 | 1.17 | 1.50E-01 | transcription_start_site | + | 248511 | 248511 | 1085  | 8785 | AN1268 |
| 2492 | CONTIG17 | 263567 | 263841 | 1.21 | 1.44E-01 | transcription_start_site | - | 259248 | 259248 | -4456 | 8797 | AN1272 |
| 2492 | CONTIG17 | 263567 | 263841 | 1.21 | 1.44E-01 | transcription_start_site | - | 258755 | 258755 | -4949 | 8798 | AN1272 |
| 2492 | CONTIG17 | 263567 | 263841 | 1.21 | 1.44E-01 | transcription_start_site | - | 261251 | 261251 | -2453 | 8800 | AN1273 |
| 2492 | CONTIG17 | 263567 | 263841 | 1.21 | 1.44E-01 | transcription_start_site | - | 260955 | 260955 | -2749 | 8801 | AN1273 |
| 2492 | CONTIG17 | 263567 | 263841 | 1.21 | 1.44E-01 | transcription_start_site | - | 260654 | 260654 | -3050 | 8802 | AN1273 |
| 2492 | CONTIG17 | 263567 | 263841 | 1.21 | 1.44E-01 | transcription_start_site | - | 260465 | 260465 | -3239 | 8803 | AN1273 |
| 2492 | CONTIG17 | 263567 | 263841 | 1.21 | 1.44E-01 | transcription_start_site | - | 260157 | 260157 | -3547 | 8804 | AN1273 |
| 2492 | CONTIG17 | 263567 | 263841 | 1.21 | 1.44E-01 | transcription_start_site | - | 259861 | 259861 | -3843 | 8805 | AN1273 |
| 2492 | CONTIG17 | 263567 | 263841 | 1.21 | 1.44E-01 | transcription_start_site | + | 266216 | 266216 | -2512 | 8810 | AN1275 |
| 2492 | CONTIG17 | 263567 | 263841 | 1.21 | 1.44E-01 | transcription_start_site | + | 266471 | 266471 | -2767 | 8811 | AN1275 |
| 1829 | CONTIG17 | 306319 | 306901 | 1.44 | 6.84E-02 | transcription_start_site | - | 303984 | 303984 | -2626 | 8856 | AN1288 |
| 1829 | CONTIG17 | 306319 | 306901 | 1.44 | 6.84E-02 | transcription_start_site | + | 310275 | 310275 | -3665 | 8857 | AN1290 |
| 1829 | CONTIG17 | 306319 | 306901 | 1.44 | 6.84E-02 | transcription_start_site | + | 310442 | 310442 | -3832 | 8858 | AN1290 |
| 1829 | CONTIG17 | 306319 | 306901 | 1.44 | 6.84E-02 | transcription_start_site | + | 310905 | 310905 | -4295 | 8859 | AN1290 |
| 1829 | CONTIG17 | 306319 | 306901 | 1.44 | 6.84E-02 | transcription_start_site | + | 311620 | 311620 | -5010 | 8860 | AN1290 |
| 2326 | CONTIG17 | 309314 | 309888 | 1.26 | 1.07E-01 | transcription_start_site | + | 310275 | 310275 | -674  | 8857 | AN1290 |
| 2326 | CONTIG17 | 309314 | 309888 | 1.26 | 1.07E-01 | transcription_start_site | + | 310442 | 310442 | -841  | 8858 | AN1290 |
| 2326 | CONTIG17 | 309314 | 309888 | 1.26 | 1.07E-01 | transcription_start_site | + | 310905 | 310905 | -1304 | 8859 | AN1290 |
| 2326 | CONTIG17 | 309314 | 309888 | 1.26 | 1.07E-01 | transcription_start_site | + | 311620 | 311620 | -2019 | 8860 | AN1290 |
| 2326 | CONTIG17 | 309314 | 309888 | 1.26 | 1.07E-01 | transcription_start_site | + | 314701 | 314701 | -5100 | 8861 | AN1291 |
| 2326 | CONTIG17 | 309314 | 309888 | 1.26 | 1.07E-01 | transcription_start_site | + | 314845 | 314845 | -5244 | 8862 | AN1291 |
| 752  | CONTIG17 | 318916 | 319190 | 2.15 | 4.61E-03 | transcription_start_site | + | 318304 | 318304 | 749   | 8867 | AN1292 |
| 752  | CONTIG17 | 318916 | 319190 | 2.15 | 4.61E-03 | transcription_start_site | + | 317965 | 317965 | 1088  | 8866 | AN1292 |
| 752  | CONTIG17 | 318916 | 319190 | 2.15 | 4.61E-03 | transcription_start_site | - | 319464 | 319464 | 411   | 8869 | AN1293 |
| 752  | CONTIG17 | 318916 | 319190 | 2.15 | 4.61E-03 | transcription_start_site | - | 319795 | 319795 | 742   | 8868 | AN1293 |
| 1948 | CONTIG17 | 326701 | 327050 | 1.39 | 8.01E-02 | transcription_start_site | - | 322841 | 322841 | -4034 | 8872 | AN1295 |
| 752  | CONTIG17 | 318916 | 319190 | 2.15 | 4.61E-03 | transcription_start_site | + | 323379 | 323379 | -4326 | 8873 | AN1296 |
| 425  | CONTIG17 | 332719 | 332988 | 2.56 | 8.69E-04 | transcription_start_site | - | 328013 | 328013 | -4840 | 8874 | AN1297 |
| 1616 | CONTIG17 | 328736 | 329225 | 1.53 | 3.08E-02 | transcription_start_site | - | 328013 | 328013 | -967  | 8874 | AN1297 |
| 1616 | CONTIG17 | 328736 | 329225 | 1.53 | 3.08E-02 | transcription_start_site | - | 327539 | 327539 | -1441 | 8875 | AN1297 |
| 1616 | CONTIG17 | 328736 | 329225 | 1.53 | 3.08E-02 | transcription_start_site | - | 327210 | 327210 | -1770 | 8876 | AN1297 |
| 1616 | CONTIG17 | 328736 | 329225 | 1.53 | 3.08E-02 | transcription_start_site | - | 326612 | 326612 | -2368 | 8877 | AN1297 |
| 1948 | CONTIG17 | 326701 | 327050 | 1.39 | 8.01E-02 | transcription_start_site | - | 326612 | 326612 | -263  | 8877 | AN1297 |
| 1948 | CONTIG17 | 326701 | 327050 | 1.39 | 8.01E-02 | transcription_start_site | - | 327210 | 327210 | 334   | 8876 | AN1297 |
| 1948 | CONTIG17 | 326701 | 327050 | 1.39 | 8.01E-02 | transcription_start_site | - | 327539 | 327539 | 663   | 8875 | AN1297 |
| 1948 | CONTIG17 | 326701 | 327050 | 1.39 | 8.01E-02 | transcription_start_site | - | 328013 | 328013 | 1137  | 8874 | AN1297 |

|      |          |        |        |      |          |                          |   |        |        |       |      |        |
|------|----------|--------|--------|------|----------|--------------------------|---|--------|--------|-------|------|--------|
| 425  | CONTIG17 | 332719 | 332988 | 2.56 | 8.69E-04 | transcription_start_site | + | 333755 | 333755 | -901  | 8878 | AN1298 |
| 1616 | CONTIG17 | 328736 | 329225 | 1.53 | 3.08E-02 | transcription_start_site | + | 333755 | 333755 | -4774 | 8878 | AN1298 |
| 2410 | CONTIG18 | 1741   | 2024   | 1.23 | 1.08E-01 | transcription_start_site | - | 1601   | 1601   | -281  | 8884 | AN1302 |
| 2410 | CONTIG18 | 1741   | 2024   | 1.23 | 1.08E-01 | transcription_start_site | - | 1380   | 1380   | -502  | 8885 | AN1302 |
| 2410 | CONTIG18 | 1741   | 2024   | 1.23 | 1.08E-01 | transcription_start_site | - | 1092   | 1092   | -790  | 8886 | AN1302 |
| 2410 | CONTIG18 | 1741   | 2024   | 1.23 | 1.08E-01 | transcription_start_site | - | 238    | 238    | -1644 | 8887 | AN1302 |
| 2731 | CONTIG18 | 5346   | 5605   | 1.11 | 1.66E-01 | transcription_start_site | - | 1601   | 1601   | -3874 | 8884 | AN1302 |
| 2731 | CONTIG18 | 5346   | 5605   | 1.11 | 1.66E-01 | transcription_start_site | - | 1380   | 1380   | -4095 | 8885 | AN1302 |
| 2731 | CONTIG18 | 5346   | 5605   | 1.11 | 1.66E-01 | transcription_start_site | - | 1092   | 1092   | -4383 | 8886 | AN1302 |
| 2039 | CONTIG18 | 6986   | 7270   | 1.36 | 6.84E-02 | transcription_start_site | - | 4751   | 4751   | -2377 | 8888 | AN1303 |
| 2039 | CONTIG18 | 6986   | 7270   | 1.36 | 6.84E-02 | transcription_start_site | - | 2672   | 2672   | -4456 | 8889 | AN1303 |
| 2410 | CONTIG18 | 1741   | 2024   | 1.23 | 1.08E-01 | transcription_start_site | - | 2672   | 2672   | 789   | 8889 | AN1303 |
| 2731 | CONTIG18 | 5346   | 5605   | 1.11 | 1.66E-01 | transcription_start_site | - | 4751   | 4751   | -724  | 8888 | AN1303 |
| 2731 | CONTIG18 | 5346   | 5605   | 1.11 | 1.66E-01 | transcription_start_site | - | 2672   | 2672   | -2803 | 8889 | AN1303 |
| 2039 | CONTIG18 | 6986   | 7270   | 1.36 | 6.84E-02 | transcription_start_site | - | 6814   | 6814   | -314  | 8890 | AN1304 |
| 2039 | CONTIG18 | 6986   | 7270   | 1.36 | 6.84E-02 | transcription_start_site | - | 6338   | 6338   | -790  | 8891 | AN1304 |
| 2255 | CONTIG18 | 11106  | 11375  | 1.28 | 9.24E-02 | transcription_start_site | - | 6814   | 6814   | -4426 | 8890 | AN1304 |
| 2255 | CONTIG18 | 11106  | 11375  | 1.28 | 9.24E-02 | transcription_start_site | - | 6338   | 6338   | -4902 | 8891 | AN1304 |
| 2731 | CONTIG18 | 5346   | 5605   | 1.11 | 1.66E-01 | transcription_start_site | - | 6338   | 6338   | 862   | 8891 | AN1304 |
| 2039 | CONTIG18 | 6986   | 7270   | 1.36 | 6.84E-02 | transcription_start_site | - | 7869   | 7869   | 741   | 8893 | AN1305 |
| 2255 | CONTIG18 | 11106  | 11375  | 1.28 | 9.24E-02 | transcription_start_site | - | 8735   | 8735   | -2505 | 8892 | AN1305 |
| 2255 | CONTIG18 | 11106  | 11375  | 1.28 | 9.24E-02 | transcription_start_site | - | 7869   | 7869   | -3371 | 8893 | AN1305 |
| 2039 | CONTIG18 | 6986   | 7270   | 1.36 | 6.84E-02 | transcription_start_site | + | 11315  | 11315  | -4187 | 8894 | AN1306 |
| 2255 | CONTIG18 | 11106  | 11375  | 1.28 | 9.24E-02 | transcription_start_site | + | 11315  | 11315  | -74   | 8894 | AN1306 |
| 551  | CONTIG18 | 47401  | 47750  | 2.38 | 9.51E-04 | transcription_start_site | - | 47496  | 47496  | -79   | 8946 | AN1319 |
| 551  | CONTIG18 | 47401  | 47750  | 2.38 | 9.51E-04 | transcription_start_site | - | 47394  | 47394  | -181  | 8947 | AN1319 |
| 551  | CONTIG18 | 47401  | 47750  | 2.38 | 9.51E-04 | transcription_start_site | - | 47229  | 47229  | -346  | 8948 | AN1319 |
| 551  | CONTIG18 | 47401  | 47750  | 2.38 | 9.51E-04 | transcription_start_site | + | 49044  | 49044  | -1468 | 8949 | AN1320 |
| 551  | CONTIG18 | 47401  | 47750  | 2.38 | 9.51E-04 | transcription_start_site | + | 49161  | 49161  | -1585 | 8950 | AN1320 |
| 1716 | CONTIG18 | 66460  | 66812  | 1.49 | 4.36E-02 | transcription_start_site | - | 65141  | 65141  | -1495 | 8961 | AN1324 |
| 1716 | CONTIG18 | 66460  | 66812  | 1.49 | 4.36E-02 | transcription_start_site | - | 65002  | 65002  | -1634 | 8962 | AN1324 |
| 2527 | CONTIG18 | 69543  | 70253  | 1.19 | 1.09E-01 | transcription_start_site | - | 65141  | 65141  | -4757 | 8961 | AN1324 |
| 2527 | CONTIG18 | 69543  | 70253  | 1.19 | 1.09E-01 | transcription_start_site | - | 65002  | 65002  | -4896 | 8962 | AN1324 |
| 2529 | CONTIG18 | 64280  | 64569  | 1.19 | 1.25E-01 | transcription_start_site | - | 65002  | 65002  | 577   | 8962 | AN1324 |
| 2529 | CONTIG18 | 64280  | 64569  | 1.19 | 1.25E-01 | transcription_start_site | - | 65141  | 65141  | 716   | 8961 | AN1324 |
| 1716 | CONTIG18 | 66460  | 66812  | 1.49 | 4.36E-02 | transcription_start_site | + | 66862  | 66862  | -226  | 8963 | AN1325 |
| 1716 | CONTIG18 | 66460  | 66812  | 1.49 | 4.36E-02 | transcription_start_site | + | 67269  | 67269  | -633  | 8964 | AN1325 |
| 1716 | CONTIG18 | 66460  | 66812  | 1.49 | 4.36E-02 | transcription_start_site | + | 67513  | 67513  | -877  | 8965 | AN1325 |
| 1716 | CONTIG18 | 66460  | 66812  | 1.49 | 4.36E-02 | transcription_start_site | + | 67803  | 67803  | -1167 | 8966 | AN1325 |
| 1716 | CONTIG18 | 66460  | 66812  | 1.49 | 4.36E-02 | transcription_start_site | + | 70239  | 70239  | -3603 | 8967 | AN1325 |
| 2527 | CONTIG18 | 69543  | 70253  | 1.19 | 1.09E-01 | transcription_start_site | + | 70239  | 70239  | -341  | 8967 | AN1325 |
| 2529 | CONTIG18 | 64280  | 64569  | 1.19 | 1.25E-01 | transcription_start_site | + | 66862  | 66862  | -2437 | 8963 | AN1325 |
| 2529 | CONTIG18 | 64280  | 64569  | 1.19 | 1.25E-01 | transcription_start_site | + | 67269  | 67269  | -2844 | 8964 | AN1325 |
| 2529 | CONTIG18 | 64280  | 64569  | 1.19 | 1.25E-01 | transcription_start_site | + | 67513  | 67513  | -3088 | 8965 | AN1325 |
| 2529 | CONTIG18 | 64280  | 64569  | 1.19 | 1.25E-01 | transcription_start_site | + | 67803  | 67803  | -3378 | 8966 | AN1325 |
| 2527 | CONTIG18 | 69543  | 70253  | 1.19 | 1.09E-01 | transcription_start_site | + | 72361  | 72361  | -2463 | 8968 | AN1326 |
| 2527 | CONTIG18 | 69543  | 70253  | 1.19 | 1.09E-01 | transcription_start_site | + | 72551  | 72551  | -2653 | 8969 | AN1326 |
| 2527 | CONTIG18 | 69543  | 70253  | 1.19 | 1.09E-01 | transcription_start_site | + | 72751  | 72751  | -2853 | 8970 | AN1326 |
| 2527 | CONTIG18 | 69543  | 70253  | 1.19 | 1.09E-01 | transcription_start_site | + | 72916  | 72916  | -3018 | 8971 | AN1326 |
| 2527 | CONTIG18 | 69543  | 70253  | 1.19 | 1.09E-01 | transcription_start_site | + | 73111  | 73111  | -3213 | 8972 | AN1326 |
| 2527 | CONTIG18 | 69543  | 70253  | 1.19 | 1.09E-01 | transcription_start_site | + | 73526  | 73526  | -3628 | 8973 | AN1326 |
| 2527 | CONTIG18 | 69543  | 70253  | 1.19 | 1.09E-01 | transcription_start_site | + | 73872  | 73872  | -3974 | 8974 | AN1326 |
| 2527 | CONTIG18 | 69543  | 70253  | 1.19 | 1.09E-01 | transcription_start_site | + | 74123  | 74123  | -4225 | 8975 | AN1326 |
| 2527 | CONTIG18 | 69543  | 70253  | 1.19 | 1.09E-01 | transcription_start_site | + | 74342  | 74342  | -4444 | 8976 | AN1326 |
| 2634 | CONTIG18 | 81767  | 82031  | 1.15 | 1.44E-01 | transcription_start_site | - | 78850  | 78850  | -3049 | 8978 | AN1328 |
| 2634 | CONTIG18 | 81767  | 82031  | 1.15 | 1.44E-01 | transcription_start_site | - | 78438  | 78438  | -3461 | 8979 | AN1328 |
| 2634 | CONTIG18 | 81767  | 82031  | 1.15 | 1.44E-01 | transcription_start_site | + | 82091  | 82091  | -192  | 8982 | AN1329 |

|      |          |        |        |      |          |                          |   |        |        |       |      |        |
|------|----------|--------|--------|------|----------|--------------------------|---|--------|--------|-------|------|--------|
| 2634 | CONTIG18 | 81767  | 82031  | 1.15 | 1.44E-01 | transcription_start_site | + | 81505  | 81505  | 394   | 8981 | AN1329 |
| 2634 | CONTIG18 | 81767  | 82031  | 1.15 | 1.44E-01 | transcription_start_site | + | 81331  | 81331  | 568   | 8980 | AN1329 |
| 2634 | CONTIG18 | 81767  | 82031  | 1.15 | 1.44E-01 | transcription_start_site | + | 82800  | 82800  | -901  | 8983 | AN1329 |
| 1229 | CONTIG18 | 84455  | 85051  | 1.74 | 7.16E-03 | transcription_start_site | - | 84666  | 84666  | -87   | 8984 | AN1330 |
| 1229 | CONTIG18 | 84455  | 85051  | 1.74 | 7.16E-03 | transcription_start_site | - | 84025  | 84025  | -728  | 8985 | AN1330 |
| 1229 | CONTIG18 | 84455  | 85051  | 1.74 | 7.16E-03 | transcription_start_site | - | 83377  | 83377  | -1376 | 8986 | AN1330 |
| 2530 | CONTIG18 | 86871  | 87352  | 1.19 | 1.25E-01 | transcription_start_site | - | 84666  | 84666  | -2445 | 8984 | AN1330 |
| 2530 | CONTIG18 | 86871  | 87352  | 1.19 | 1.25E-01 | transcription_start_site | - | 84025  | 84025  | -3086 | 8985 | AN1330 |
| 2530 | CONTIG18 | 86871  | 87352  | 1.19 | 1.25E-01 | transcription_start_site | - | 83377  | 83377  | -3734 | 8986 | AN1330 |
| 1229 | CONTIG18 | 84455  | 85051  | 1.74 | 7.16E-03 | transcription_start_site | + | 85664  | 85664  | -911  | 8987 | AN1331 |
| 1229 | CONTIG18 | 84455  | 85051  | 1.74 | 7.16E-03 | transcription_start_site | + | 86120  | 86120  | -1367 | 8988 | AN1331 |
| 2530 | CONTIG18 | 86871  | 87352  | 1.19 | 1.25E-01 | transcription_start_site | + | 86120  | 86120  | 991   | 8988 | AN1331 |
| 2634 | CONTIG18 | 81767  | 82031  | 1.15 | 1.44E-01 | transcription_start_site | + | 85664  | 85664  | -3765 | 8987 | AN1331 |
| 2634 | CONTIG18 | 81767  | 82031  | 1.15 | 1.44E-01 | transcription_start_site | + | 86120  | 86120  | -4221 | 8988 | AN1331 |
| 1229 | CONTIG18 | 84455  | 85051  | 1.74 | 7.16E-03 | transcription_start_site | + | 87436  | 87436  | -2683 | 8989 | AN1332 |
| 2530 | CONTIG18 | 86871  | 87352  | 1.19 | 1.25E-01 | transcription_start_site | + | 87436  | 87436  | -324  | 8989 | AN1332 |
| 509  | CONTIG18 | 89778  | 90127  | 2.43 | 8.69E-04 | transcription_start_site | - | 89561  | 89561  | -391  | 8990 | AN1333 |
| 509  | CONTIG18 | 89778  | 90127  | 2.43 | 8.69E-04 | transcription_start_site | - | 89449  | 89449  | -503  | 8991 | AN1333 |
| 509  | CONTIG18 | 89778  | 90127  | 2.43 | 8.69E-04 | transcription_start_site | - | 89317  | 89317  | -635  | 8992 | AN1333 |
| 509  | CONTIG18 | 89778  | 90127  | 2.43 | 8.69E-04 | transcription_start_site | - | 89176  | 89176  | -776  | 8993 | AN1333 |
| 509  | CONTIG18 | 89778  | 90127  | 2.43 | 8.69E-04 | transcription_start_site | + | 90354  | 90354  | -401  | 8994 | AN1334 |
| 509  | CONTIG18 | 89778  | 90127  | 2.43 | 8.69E-04 | transcription_start_site | + | 90450  | 90450  | -497  | 8995 | AN1334 |
| 2530 | CONTIG18 | 86871  | 87352  | 1.19 | 1.25E-01 | transcription_start_site | + | 90354  | 90354  | -3242 | 8994 | AN1334 |
| 2530 | CONTIG18 | 86871  | 87352  | 1.19 | 1.25E-01 | transcription_start_site | + | 90450  | 90450  | -3338 | 8995 | AN1334 |
| 509  | CONTIG18 | 89778  | 90127  | 2.43 | 8.69E-04 | transcription_start_site | + | 93114  | 93114  | -3161 | 9000 | AN1336 |
| 222  | CONTIG18 | 99388  | 99892  | 2.89 | 0.00E+00 | transcription_start_site | - | 100213 | 100213 | 573   | 9003 | AN1338 |
| 222  | CONTIG18 | 99388  | 99892  | 2.89 | 0.00E+00 | transcription_start_site | - | 100389 | 100389 | 749   | 9002 | AN1338 |
| 222  | CONTIG18 | 99388  | 99892  | 2.89 | 0.00E+00 | transcription_start_site | - | 100572 | 100572 | 932   | 9001 | AN1338 |
| 1424 | CONTIG18 | 105093 | 105352 | 1.62 | 2.62E-02 | transcription_start_site | - | 100572 | 100572 | -4650 | 9001 | AN1338 |
| 1424 | CONTIG18 | 105093 | 105352 | 1.62 | 2.62E-02 | transcription_start_site | - | 100389 | 100389 | -4833 | 9002 | AN1338 |
| 1424 | CONTIG18 | 105093 | 105352 | 1.62 | 2.62E-02 | transcription_start_site | - | 100213 | 100213 | -5009 | 9003 | AN1338 |
| 602  | CONTIG18 | 109503 | 109867 | 2.3  | 1.22E-03 | transcription_start_site | - | 104935 | 104935 | -4750 | 9004 | AN1339 |
| 602  | CONTIG18 | 109503 | 109867 | 2.3  | 1.22E-03 | transcription_start_site | - | 104833 | 104833 | -4852 | 9005 | AN1339 |
| 602  | CONTIG18 | 109503 | 109867 | 2.3  | 1.22E-03 | transcription_start_site | - | 104732 | 104732 | -4953 | 9006 | AN1339 |
| 602  | CONTIG18 | 109503 | 109867 | 2.3  | 1.22E-03 | transcription_start_site | - | 104629 | 104629 | -5056 | 9007 | AN1339 |
| 1424 | CONTIG18 | 105093 | 105352 | 1.62 | 2.62E-02 | transcription_start_site | - | 104935 | 104935 | -287  | 9004 | AN1339 |
| 1424 | CONTIG18 | 105093 | 105352 | 1.62 | 2.62E-02 | transcription_start_site | - | 104833 | 104833 | -389  | 9005 | AN1339 |
| 1424 | CONTIG18 | 105093 | 105352 | 1.62 | 2.62E-02 | transcription_start_site | - | 104732 | 104732 | -490  | 9006 | AN1339 |
| 1424 | CONTIG18 | 105093 | 105352 | 1.62 | 2.62E-02 | transcription_start_site | - | 104629 | 104629 | -593  | 9007 | AN1339 |
| 1424 | CONTIG18 | 105093 | 105352 | 1.62 | 2.62E-02 | transcription_start_site | - | 104454 | 104454 | -768  | 9008 | AN1339 |
| 1424 | CONTIG18 | 105093 | 105352 | 1.62 | 2.62E-02 | transcription_start_site | - | 104217 | 104217 | -1005 | 9009 | AN1339 |
| 1424 | CONTIG18 | 105093 | 105352 | 1.62 | 2.62E-02 | transcription_start_site | - | 102952 | 102952 | -2270 | 9010 | AN1339 |
| 1424 | CONTIG18 | 105093 | 105352 | 1.62 | 2.62E-02 | transcription_start_site | - | 102611 | 102611 | -2611 | 9011 | AN1339 |
| 1424 | CONTIG18 | 105093 | 105352 | 1.62 | 2.62E-02 | transcription_start_site | - | 102426 | 102426 | -2796 | 9012 | AN1339 |
| 1424 | CONTIG18 | 105093 | 105352 | 1.62 | 2.62E-02 | transcription_start_site | - | 101980 | 101980 | -3242 | 9013 | AN1339 |
| 602  | CONTIG18 | 109503 | 109867 | 2.3  | 1.22E-03 | transcription_start_site | - | 107244 | 107244 | -2441 | 9014 | AN1340 |
| 602  | CONTIG18 | 109503 | 109867 | 2.3  | 1.22E-03 | transcription_start_site | - | 107059 | 107059 | -2626 | 9015 | AN1340 |
| 602  | CONTIG18 | 109503 | 109867 | 2.3  | 1.22E-03 | transcription_start_site | - | 106716 | 106716 | -2969 | 9016 | AN1340 |
| 602  | CONTIG18 | 109503 | 109867 | 2.3  | 1.22E-03 | transcription_start_site | - | 106570 | 106570 | -3115 | 9017 | AN1340 |
| 602  | CONTIG18 | 109503 | 109867 | 2.3  | 1.22E-03 | transcription_start_site | - | 108727 | 108727 | -958  | 9018 | AN1341 |
| 602  | CONTIG18 | 109503 | 109867 | 2.3  | 1.22E-03 | transcription_start_site | - | 108607 | 108607 | -1078 | 9019 | AN1341 |
| 602  | CONTIG18 | 109503 | 109867 | 2.3  | 1.22E-03 | transcription_start_site | - | 108518 | 108518 | -1167 | 9020 | AN1341 |
| 602  | CONTIG18 | 109503 | 109867 | 2.3  | 1.22E-03 | transcription_start_site | - | 108040 | 108040 | -1645 | 9021 | AN1341 |
| 602  | CONTIG18 | 109503 | 109867 | 2.3  | 1.22E-03 | transcription_start_site | + | 109851 | 109851 | -166  | 9022 | AN1342 |
| 602  | CONTIG18 | 109503 | 109867 | 2.3  | 1.22E-03 | transcription_start_site | + | 109994 | 109994 | -309  | 9023 | AN1342 |
| 1424 | CONTIG18 | 105093 | 105352 | 1.62 | 2.62E-02 | transcription_start_site | + | 109851 | 109851 | -4628 | 9022 | AN1342 |
| 1424 | CONTIG18 | 105093 | 105352 | 1.62 | 2.62E-02 | transcription_start_site | + | 109994 | 109994 | -4771 | 9023 | AN1342 |



|      |          |        |        |      |          |                          |   |        |        |       |      |        |
|------|----------|--------|--------|------|----------|--------------------------|---|--------|--------|-------|------|--------|
| 602  | CONTIG18 | 109503 | 109867 | 2.3  | 1.22E-03 | transcription_start_site | + | 114307 | 114307 | -4622 | 9026 | AN1344 |
| 602  | CONTIG18 | 109503 | 109867 | 2.3  | 1.22E-03 | transcription_start_site | + | 114459 | 114459 | -4774 | 9027 | AN1344 |
| 602  | CONTIG18 | 109503 | 109867 | 2.3  | 1.22E-03 | transcription_start_site | + | 114810 | 114810 | -5125 | 9028 | AN1344 |
| 328  | CONTIG18 | 137338 | 137677 | 2.72 | 0.00E+00 | transcription_start_site | + | 137985 | 137985 | -477  | 9058 | AN1356 |
| 2256 | CONTIG18 | 144903 | 145201 | 1.28 | 9.24E-02 | transcription_start_site | - | 141569 | 141569 | -3483 | 9059 | AN1357 |
| 2256 | CONTIG18 | 144903 | 145201 | 1.28 | 9.24E-02 | transcription_start_site | - | 141005 | 141005 | -4047 | 9060 | AN1357 |
| 2256 | CONTIG18 | 144903 | 145201 | 1.28 | 9.24E-02 | transcription_start_site | - | 140607 | 140607 | -4445 | 9061 | AN1357 |
| 2256 | CONTIG18 | 144903 | 145201 | 1.28 | 9.24E-02 | transcription_start_site | - | 140158 | 140158 | -4894 | 9062 | AN1357 |
| 2256 | CONTIG18 | 144903 | 145201 | 1.28 | 9.24E-02 | transcription_start_site | - | 144843 | 144843 | -209  | 9063 | AN1358 |
| 2256 | CONTIG18 | 144903 | 145201 | 1.28 | 9.24E-02 | transcription_start_site | - | 144408 | 144408 | -644  | 9064 | AN1358 |
| 2256 | CONTIG18 | 144903 | 145201 | 1.28 | 9.24E-02 | transcription_start_site | - | 144017 | 144017 | -1035 | 9065 | AN1358 |
| 2256 | CONTIG18 | 144903 | 145201 | 1.28 | 9.24E-02 | transcription_start_site | - | 143891 | 143891 | -1161 | 9066 | AN1358 |
| 2256 | CONTIG18 | 144903 | 145201 | 1.28 | 9.24E-02 | transcription_start_site | - | 143752 | 143752 | -1300 | 9067 | AN1358 |
| 2256 | CONTIG18 | 144903 | 145201 | 1.28 | 9.24E-02 | transcription_start_site | - | 143493 | 143493 | -1559 | 9068 | AN1358 |
| 2256 | CONTIG18 | 144903 | 145201 | 1.28 | 9.24E-02 | transcription_start_site | - | 143171 | 143171 | -1881 | 9069 | AN1358 |
| 2256 | CONTIG18 | 144903 | 145201 | 1.28 | 9.24E-02 | transcription_start_site | - | 143022 | 143022 | -2030 | 9070 | AN1358 |
| 2818 | CONTIG18 | 160371 | 160945 | 1.06 | 1.99E-01 | transcription_start_site | - | 155833 | 155833 | -4825 | 9083 | AN1364 |
| 2818 | CONTIG18 | 160371 | 160945 | 1.06 | 1.99E-01 | transcription_start_site | - | 155626 | 155626 | -5032 | 9084 | AN1364 |
| 2818 | CONTIG18 | 160371 | 160945 | 1.06 | 1.99E-01 | transcription_start_site | - | 157191 | 157191 | -3467 | 9086 | AN1365 |
| 2818 | CONTIG18 | 160371 | 160945 | 1.06 | 1.99E-01 | transcription_start_site | - | 157014 | 157014 | -3644 | 9087 | AN1365 |
| 2818 | CONTIG18 | 160371 | 160945 | 1.06 | 1.99E-01 | transcription_start_site | - | 156597 | 156597 | -4061 | 9088 | AN1365 |
| 1152 | CONTIG18 | 165841 | 166326 | 1.79 | 4.13E-03 | transcription_start_site | - | 162411 | 162411 | -3672 | 9092 | AN1367 |
| 1152 | CONTIG18 | 165841 | 166326 | 1.79 | 4.13E-03 | transcription_start_site | - | 162352 | 162352 | -3731 | 9093 | AN1367 |
| 2818 | CONTIG18 | 160371 | 160945 | 1.06 | 1.99E-01 | transcription_start_site | + | 162628 | 162628 | -1970 | 9094 | AN1368 |
| 2818 | CONTIG18 | 160371 | 160945 | 1.06 | 1.99E-01 | transcription_start_site | + | 162816 | 162816 | -2158 | 9095 | AN1368 |
| 1152 | CONTIG18 | 165841 | 166326 | 1.79 | 4.13E-03 | transcription_start_site | - | 165829 | 165829 | -254  | 9096 | AN1369 |
| 1152 | CONTIG18 | 165841 | 166326 | 1.79 | 4.13E-03 | transcription_start_site | - | 165580 | 165580 | -503  | 9097 | AN1369 |
| 1152 | CONTIG18 | 165841 | 166326 | 1.79 | 4.13E-03 | transcription_start_site | - | 165343 | 165343 | -740  | 9098 | AN1369 |
| 1152 | CONTIG18 | 165841 | 166326 | 1.79 | 4.13E-03 | transcription_start_site | + | 166670 | 166670 | -586  | 9099 | AN1370 |
| 1152 | CONTIG18 | 165841 | 166326 | 1.79 | 4.13E-03 | transcription_start_site | + | 166965 | 166965 | -881  | 9100 | AN1370 |
| 1152 | CONTIG18 | 165841 | 166326 | 1.79 | 4.13E-03 | transcription_start_site | + | 167136 | 167136 | -1052 | 9101 | AN1370 |
| 1152 | CONTIG18 | 165841 | 166326 | 1.79 | 4.13E-03 | transcription_start_site | + | 169165 | 169165 | -3081 | 9103 | AN1372 |
| 1152 | CONTIG18 | 165841 | 166326 | 1.79 | 4.13E-03 | transcription_start_site | + | 170068 | 170068 | -3984 | 9104 | AN1372 |
| 1152 | CONTIG18 | 165841 | 166326 | 1.79 | 4.13E-03 | transcription_start_site | + | 170222 | 170222 | -4138 | 9105 | AN1372 |
| 1152 | CONTIG18 | 165841 | 166326 | 1.79 | 4.13E-03 | transcription_start_site | + | 170607 | 170607 | -4523 | 9106 | AN1372 |
| 1152 | CONTIG18 | 165841 | 166326 | 1.79 | 4.13E-03 | transcription_start_site | + | 170844 | 170844 | -4760 | 9107 | AN1372 |
| 3059 | CONTIG19 | 10146  | 10415  | 0.71 | 1.93E-01 | transcription_start_site | + | 9516   | 9516   | 764   | 9116 | AN1375 |
| 3059 | CONTIG19 | 10146  | 10415  | 0.71 | 1.93E-01 | transcription_start_site | + | 9287   | 9287   | 993   | 9115 | AN1375 |
| 3059 | CONTIG19 | 10146  | 10415  | 0.71 | 1.93E-01 | transcription_start_site | + | 12698  | 12698  | -2417 | 9122 | AN1377 |
| 3059 | CONTIG19 | 10146  | 10415  | 0.71 | 1.93E-01 | transcription_start_site | + | 15392  | 15392  | -5111 | 9123 | AN1377 |
| 2396 | CONTIG19 | 18454  | 19108  | 1.23 | 4.81E-03 | transcription_start_site | - | 18067  | 18067  | -714  | 9124 | AN1378 |
| 2396 | CONTIG19 | 18454  | 19108  | 1.23 | 4.81E-03 | transcription_start_site | - | 17821  | 17821  | -960  | 9125 | AN1378 |
| 2396 | CONTIG19 | 18454  | 19108  | 1.23 | 4.81E-03 | transcription_start_site | - | 17723  | 17723  | -1058 | 9126 | AN1378 |
| 2396 | CONTIG19 | 18454  | 19108  | 1.23 | 4.81E-03 | transcription_start_site | - | 17480  | 17480  | -1301 | 9127 | AN1378 |
| 2396 | CONTIG19 | 18454  | 19108  | 1.23 | 4.81E-03 | transcription_start_site | + | 19747  | 19747  | -966  | 9128 | AN1379 |
| 2396 | CONTIG19 | 18454  | 19108  | 1.23 | 4.81E-03 | transcription_start_site | + | 20073  | 20073  | -1292 | 9129 | AN1379 |
| 2396 | CONTIG19 | 18454  | 19108  | 1.23 | 4.81E-03 | transcription_start_site | + | 23627  | 23627  | -4846 | 9132 | AN1381 |
| 3039 | CONTIG19 | 29484  | 29762  | 0.8  | 1.25E-01 | transcription_start_site | - | 29273  | 29273  | -350  | 9135 | AN1383 |
| 3039 | CONTIG19 | 29484  | 29762  | 0.8  | 1.25E-01 | transcription_start_site | - | 29176  | 29176  | -447  | 9136 | AN1383 |
| 3039 | CONTIG19 | 29484  | 29762  | 0.8  | 1.25E-01 | transcription_start_site | - | 29029  | 29029  | -594  | 9137 | AN1383 |
| 1031 | CONTIG19 | 66538  | 66807  | 1.88 | 0.00E+00 | transcription_start_site | - | 66140  | 66140  | -532  | 9167 | AN1396 |
| 1031 | CONTIG19 | 66538  | 66807  | 1.88 | 0.00E+00 | transcription_start_site | - | 65633  | 65633  | -1039 | 9168 | AN1396 |
| 1031 | CONTIG19 | 66538  | 66807  | 1.88 | 0.00E+00 | transcription_start_site | - | 65321  | 65321  | -1351 | 9169 | AN1396 |
| 1031 | CONTIG19 | 66538  | 66807  | 1.88 | 0.00E+00 | transcription_start_site | - | 63939  | 63939  | -2733 | 9170 | AN1396 |
| 1031 | CONTIG19 | 66538  | 66807  | 1.88 | 0.00E+00 | transcription_start_site | + | 68186  | 68186  | -1513 | 9171 | AN1397 |
| 1031 | CONTIG19 | 66538  | 66807  | 1.88 | 0.00E+00 | transcription_start_site | + | 68626  | 68626  | -1953 | 9172 | AN1397 |
| 1031 | CONTIG19 | 66538  | 66807  | 1.88 | 0.00E+00 | transcription_start_site | + | 69450  | 69450  | -2777 | 9173 | AN1397 |

|      |          |       |       |      |          |                          |   |       |       |       |      |        |
|------|----------|-------|-------|------|----------|--------------------------|---|-------|-------|-------|------|--------|
| 1031 | CONTIG19 | 66538 | 66807 | 1.88 | 0.00E+00 | transcription_start_site | + | 69654 | 69654 | -2981 | 9174 | AN1397 |
| 1031 | CONTIG19 | 66538 | 66807 | 1.88 | 0.00E+00 | transcription_start_site | + | 69997 | 69997 | -3324 | 9175 | AN1397 |
| 1031 | CONTIG19 | 66538 | 66807 | 1.88 | 0.00E+00 | transcription_start_site | + | 70207 | 70207 | -3534 | 9176 | AN1397 |
| 1032 | CONTIG20 | 696   | 1030  | 1.88 | 5.64E-04 | transcription_start_site | + | 4057  | 4057  | -3194 | 9180 | AN1399 |
| 1032 | CONTIG20 | 696   | 1030  | 1.88 | 5.64E-04 | transcription_start_site | + | 4165  | 4165  | -3302 | 9181 | AN1399 |
| 1032 | CONTIG20 | 696   | 1030  | 1.88 | 5.64E-04 | transcription_start_site | + | 4660  | 4660  | -3797 | 9182 | AN1399 |
| 1032 | CONTIG20 | 696   | 1030  | 1.88 | 5.64E-04 | transcription_start_site | + | 5287  | 5287  | -4424 | 9183 | AN1399 |
| 1032 | CONTIG20 | 696   | 1030  | 1.88 | 5.64E-04 | transcription_start_site | + | 5725  | 5725  | -4862 | 9184 | AN1399 |
| 2099 | CONTIG20 | 12751 | 13040 | 1.33 | 1.57E-02 | transcription_start_site | - | 11577 | 11577 | -1318 | 9187 | AN1401 |
| 2099 | CONTIG20 | 12751 | 13040 | 1.33 | 1.57E-02 | transcription_start_site | - | 11444 | 11444 | -1451 | 9188 | AN1401 |
| 2099 | CONTIG20 | 12751 | 13040 | 1.33 | 1.57E-02 | transcription_start_site | - | 11352 | 11352 | -1543 | 9189 | AN1401 |
| 2099 | CONTIG20 | 12751 | 13040 | 1.33 | 1.57E-02 | transcription_start_site | - | 11232 | 11232 | -1663 | 9190 | AN1401 |
| 2099 | CONTIG20 | 12751 | 13040 | 1.33 | 1.57E-02 | transcription_start_site | - | 11103 | 11103 | -1792 | 9191 | AN1401 |
| 2099 | CONTIG20 | 12751 | 13040 | 1.33 | 1.57E-02 | transcription_start_site | - | 10332 | 10332 | -2563 | 9192 | AN1401 |
| 2099 | CONTIG20 | 12751 | 13040 | 1.33 | 1.57E-02 | transcription_start_site | - | 9508  | 9508  | -3387 | 9193 | AN1401 |
| 2099 | CONTIG20 | 12751 | 13040 | 1.33 | 1.57E-02 | transcription_start_site | - | 8990  | 8990  | -3905 | 9194 | AN1401 |
| 2099 | CONTIG20 | 12751 | 13040 | 1.33 | 1.57E-02 | transcription_start_site | - | 8683  | 8683  | -4212 | 9195 | AN1401 |
| 2099 | CONTIG20 | 12751 | 13040 | 1.33 | 1.57E-02 | transcription_start_site | - | 8246  | 8246  | -4649 | 9196 | AN1401 |
| 2099 | CONTIG20 | 12751 | 13040 | 1.33 | 1.57E-02 | transcription_start_site | - | 8019  | 8019  | -4876 | 9197 | AN1401 |
| 2099 | CONTIG20 | 12751 | 13040 | 1.33 | 1.57E-02 | transcription_start_site | + | 13966 | 13966 | -1070 | 9198 | AN1402 |
| 2099 | CONTIG20 | 12751 | 13040 | 1.33 | 1.57E-02 | transcription_start_site | + | 14899 | 14899 | -2003 | 9199 | AN1402 |
| 804  | CONTIG22 | 9321  | 9576  | 2.1  | 1.11E-02 | transcription_start_site | - | 7876  | 7876  | -1572 | 9205 | AN1406 |
| 804  | CONTIG22 | 9321  | 9576  | 2.1  | 1.11E-02 | transcription_start_site | - | 7774  | 7774  | -1674 | 9206 | AN1406 |
| 804  | CONTIG22 | 9321  | 9576  | 2.1  | 1.11E-02 | transcription_start_site | - | 7743  | 7743  | -1705 | 9207 | AN1406 |
| 804  | CONTIG22 | 9321  | 9576  | 2.1  | 1.11E-02 | transcription_start_site | - | 7646  | 7646  | -1802 | 9208 | AN1406 |
| 804  | CONTIG22 | 9321  | 9576  | 2.1  | 1.11E-02 | transcription_start_site | - | 7078  | 7078  | -2370 | 9209 | AN1406 |
| 804  | CONTIG22 | 9321  | 9576  | 2.1  | 1.11E-02 | transcription_start_site | - | 6689  | 6689  | -2759 | 9210 | AN1406 |
| 804  | CONTIG22 | 9321  | 9576  | 2.1  | 1.11E-02 | transcription_start_site | - | 6361  | 6361  | -3087 | 9211 | AN1406 |
| 804  | CONTIG22 | 9321  | 9576  | 2.1  | 1.11E-02 | transcription_start_site | - | 5761  | 5761  | -3687 | 9212 | AN1406 |
| 804  | CONTIG22 | 9321  | 9576  | 2.1  | 1.11E-02 | transcription_start_site | - | 5259  | 5259  | -4189 | 9213 | AN1406 |
| 804  | CONTIG22 | 9321  | 9576  | 2.1  | 1.11E-02 | transcription_start_site | + | 9798  | 9798  | -349  | 9214 | AN1407 |
| 804  | CONTIG22 | 9321  | 9576  | 2.1  | 1.11E-02 | transcription_start_site | + | 10078 | 10078 | -629  | 9215 | AN1407 |
| 804  | CONTIG22 | 9321  | 9576  | 2.1  | 1.11E-02 | transcription_start_site | + | 14139 | 14139 | -4690 | 9220 | AN1409 |
| 804  | CONTIG22 | 9321  | 9576  | 2.1  | 1.11E-02 | transcription_start_site | + | 14266 | 14266 | -4817 | 9221 | AN1409 |
| 804  | CONTIG22 | 9321  | 9576  | 2.1  | 1.11E-02 | transcription_start_site | + | 14372 | 14372 | -4923 | 9222 | AN1409 |
| 804  | CONTIG22 | 9321  | 9576  | 2.1  | 1.11E-02 | transcription_start_site | + | 14498 | 14498 | -5049 | 9223 | AN1409 |
| 33   | CONTIG22 | 31065 | 31859 | 3.52 | 0.00E+00 | transcription_start_site | - | 30335 | 30335 | -1127 | 9240 | AN1414 |
| 33   | CONTIG22 | 31065 | 31859 | 3.52 | 0.00E+00 | transcription_start_site | - | 30131 | 30131 | -1331 | 9241 | AN1414 |
| 33   | CONTIG22 | 31065 | 31859 | 3.52 | 0.00E+00 | transcription_start_site | - | 28529 | 28529 | -2933 | 9242 | AN1414 |
| 139  | CONTIG22 | 32120 | 32904 | 3.08 | 0.00E+00 | transcription_start_site | - | 30335 | 30335 | -2177 | 9240 | AN1414 |
| 139  | CONTIG22 | 32120 | 32904 | 3.08 | 0.00E+00 | transcription_start_site | - | 30131 | 30131 | -2381 | 9241 | AN1414 |
| 139  | CONTIG22 | 32120 | 32904 | 3.08 | 0.00E+00 | transcription_start_site | - | 28529 | 28529 | -3983 | 9242 | AN1414 |
| 33   | CONTIG22 | 31065 | 31859 | 3.52 | 0.00E+00 | transcription_start_site | + | 32578 | 32578 | -1116 | 9243 | AN1415 |
| 33   | CONTIG22 | 31065 | 31859 | 3.52 | 0.00E+00 | transcription_start_site | + | 33024 | 33024 | -1562 | 9244 | AN1415 |
| 139  | CONTIG22 | 32120 | 32904 | 3.08 | 0.00E+00 | transcription_start_site | + | 32578 | 32578 | -66   | 9243 | AN1415 |
| 139  | CONTIG22 | 32120 | 32904 | 3.08 | 0.00E+00 | transcription_start_site | + | 33024 | 33024 | -512  | 9244 | AN1415 |
| 139  | CONTIG22 | 32120 | 32904 | 3.08 | 0.00E+00 | transcription_start_site | - | 33851 | 33851 | 1339  | 9248 | AN1416 |
| 283  | CONTIG22 | 40145 | 40644 | 2.79 | 0.00E+00 | transcription_start_site | - | 36720 | 36720 | -3674 | 9245 | AN1416 |
| 283  | CONTIG22 | 40145 | 40644 | 2.79 | 0.00E+00 | transcription_start_site | - | 36552 | 36552 | -3842 | 9246 | AN1416 |
| 283  | CONTIG22 | 40145 | 40644 | 2.79 | 0.00E+00 | transcription_start_site | - | 36385 | 36385 | -4009 | 9247 | AN1416 |
| 1465 | CONTIG22 | 36990 | 37344 | 1.61 | 5.88E-02 | transcription_start_site | - | 36720 | 36720 | -447  | 9245 | AN1416 |
| 1465 | CONTIG22 | 36990 | 37344 | 1.61 | 5.88E-02 | transcription_start_site | - | 36552 | 36552 | -615  | 9246 | AN1416 |
| 1465 | CONTIG22 | 36990 | 37344 | 1.61 | 5.88E-02 | transcription_start_site | - | 36385 | 36385 | -782  | 9247 | AN1416 |
| 1465 | CONTIG22 | 36990 | 37344 | 1.61 | 5.88E-02 | transcription_start_site | - | 33851 | 33851 | -3316 | 9248 | AN1416 |
| 283  | CONTIG22 | 40145 | 40644 | 2.79 | 0.00E+00 | transcription_start_site | - | 40615 | 40615 | 220   | 9249 | AN1417 |
| 283  | CONTIG22 | 40145 | 40644 | 2.79 | 0.00E+00 | transcription_start_site | - | 40167 | 40167 | -227  | 9250 | AN1417 |
| 283  | CONTIG22 | 40145 | 40644 | 2.79 | 0.00E+00 | transcription_start_site | - | 40043 | 40043 | -351  | 9251 | AN1417 |

|      |          |       |       |      |          |                          |   |       |       |       |      |        |
|------|----------|-------|-------|------|----------|--------------------------|---|-------|-------|-------|------|--------|
| 283  | CONTIG22 | 40145 | 40644 | 2.79 | 0.00E+00 | transcription_start_site | - | 39898 | 39898 | -496  | 9252 | AN1417 |
| 283  | CONTIG22 | 40145 | 40644 | 2.79 | 0.00E+00 | transcription_start_site | - | 39776 | 39776 | -618  | 9253 | AN1417 |
| 283  | CONTIG22 | 40145 | 40644 | 2.79 | 0.00E+00 | transcription_start_site | - | 39566 | 39566 | -828  | 9254 | AN1417 |
| 1061 | CONTIG22 | 42835 | 43123 | 1.86 | 2.62E-02 | transcription_start_site | - | 40615 | 40615 | -2364 | 9249 | AN1417 |
| 1061 | CONTIG22 | 42835 | 43123 | 1.86 | 2.62E-02 | transcription_start_site | - | 40167 | 40167 | -2812 | 9250 | AN1417 |
| 1061 | CONTIG22 | 42835 | 43123 | 1.86 | 2.62E-02 | transcription_start_site | - | 40043 | 40043 | -2936 | 9251 | AN1417 |
| 1061 | CONTIG22 | 42835 | 43123 | 1.86 | 2.62E-02 | transcription_start_site | - | 39898 | 39898 | -3081 | 9252 | AN1417 |
| 1061 | CONTIG22 | 42835 | 43123 | 1.86 | 2.62E-02 | transcription_start_site | - | 39776 | 39776 | -3203 | 9253 | AN1417 |
| 1061 | CONTIG22 | 42835 | 43123 | 1.86 | 2.62E-02 | transcription_start_site | - | 39566 | 39566 | -3413 | 9254 | AN1417 |
| 283  | CONTIG22 | 40145 | 40644 | 2.79 | 0.00E+00 | transcription_start_site | + | 40775 | 40775 | -380  | 9255 | AN1418 |
| 283  | CONTIG22 | 40145 | 40644 | 2.79 | 0.00E+00 | transcription_start_site | + | 40830 | 40830 | -435  | 9256 | AN1418 |
| 283  | CONTIG22 | 40145 | 40644 | 2.79 | 0.00E+00 | transcription_start_site | + | 40957 | 40957 | -562  | 9257 | AN1418 |
| 283  | CONTIG22 | 40145 | 40644 | 2.79 | 0.00E+00 | transcription_start_site | + | 41154 | 41154 | -759  | 9258 | AN1418 |
| 1465 | CONTIG22 | 36990 | 37344 | 1.61 | 5.88E-02 | transcription_start_site | + | 40775 | 40775 | -3608 | 9255 | AN1418 |
| 1465 | CONTIG22 | 36990 | 37344 | 1.61 | 5.88E-02 | transcription_start_site | + | 40830 | 40830 | -3663 | 9256 | AN1418 |
| 1465 | CONTIG22 | 36990 | 37344 | 1.61 | 5.88E-02 | transcription_start_site | + | 40957 | 40957 | -3790 | 9257 | AN1418 |
| 1465 | CONTIG22 | 36990 | 37344 | 1.61 | 5.88E-02 | transcription_start_site | + | 41154 | 41154 | -3987 | 9258 | AN1418 |
| 283  | CONTIG22 | 40145 | 40644 | 2.79 | 0.00E+00 | transcription_start_site | + | 43443 | 43443 | -3048 | 9259 | AN1419 |
| 283  | CONTIG22 | 40145 | 40644 | 2.79 | 0.00E+00 | transcription_start_site | + | 43714 | 43714 | -3319 | 9260 | AN1419 |
| 283  | CONTIG22 | 40145 | 40644 | 2.79 | 0.00E+00 | transcription_start_site | + | 44144 | 44144 | -3749 | 9261 | AN1419 |
| 283  | CONTIG22 | 40145 | 40644 | 2.79 | 0.00E+00 | transcription_start_site | + | 44430 | 44430 | -4035 | 9262 | AN1419 |
| 1061 | CONTIG22 | 42835 | 43123 | 1.86 | 2.62E-02 | transcription_start_site | + | 43443 | 43443 | -464  | 9259 | AN1419 |
| 1061 | CONTIG22 | 42835 | 43123 | 1.86 | 2.62E-02 | transcription_start_site | + | 43714 | 43714 | -735  | 9260 | AN1419 |
| 1061 | CONTIG22 | 42835 | 43123 | 1.86 | 2.62E-02 | transcription_start_site | + | 44144 | 44144 | -1165 | 9261 | AN1419 |
| 1061 | CONTIG22 | 42835 | 43123 | 1.86 | 2.62E-02 | transcription_start_site | + | 44430 | 44430 | -1451 | 9262 | AN1419 |
| 1004 | CONTIG22 | 52296 | 52570 | 1.91 | 2.12E-02 | transcription_start_site | - | 47928 | 47928 | -4505 | 9263 | AN1420 |
| 1004 | CONTIG22 | 52296 | 52570 | 1.91 | 2.12E-02 | transcription_start_site | - | 47474 | 47474 | -4959 | 9264 | AN1420 |
| 1004 | CONTIG22 | 52296 | 52570 | 1.91 | 2.12E-02 | transcription_start_site | + | 51744 | 51744 | 689   | 9269 | AN1422 |
| 1004 | CONTIG22 | 52296 | 52570 | 1.91 | 2.12E-02 | transcription_start_site | + | 51577 | 51577 | 856   | 9268 | AN1422 |
| 1004 | CONTIG22 | 52296 | 52570 | 1.91 | 2.12E-02 | transcription_start_site | + | 53009 | 53009 | -576  | 9270 | AN1423 |
| 1004 | CONTIG22 | 52296 | 52570 | 1.91 | 2.12E-02 | transcription_start_site | + | 53420 | 53420 | -987  | 9271 | AN1423 |
| 1004 | CONTIG22 | 52296 | 52570 | 1.91 | 2.12E-02 | transcription_start_site | + | 53487 | 53487 | -1054 | 9272 | AN1423 |
| 1004 | CONTIG22 | 52296 | 52570 | 1.91 | 2.12E-02 | transcription_start_site | + | 55246 | 55246 | -2813 | 9273 | AN1424 |
| 84   | CONTIG22 | 60919 | 61343 | 3.28 | 0.00E+00 | transcription_start_site | + | 61870 | 61870 | -739  | 9274 | AN1425 |
| 84   | CONTIG22 | 60919 | 61343 | 3.28 | 0.00E+00 | transcription_start_site | + | 61995 | 61995 | -864  | 9275 | AN1425 |
| 84   | CONTIG22 | 60919 | 61343 | 3.28 | 0.00E+00 | transcription_start_site | + | 62247 | 62247 | -1116 | 9276 | AN1425 |
| 410  | CONTIG22 | 58821 | 59093 | 2.59 | 1.54E-03 | transcription_start_site | + | 61870 | 61870 | -2913 | 9274 | AN1425 |
| 410  | CONTIG22 | 58821 | 59093 | 2.59 | 1.54E-03 | transcription_start_site | + | 61995 | 61995 | -3038 | 9275 | AN1425 |
| 410  | CONTIG22 | 58821 | 59093 | 2.59 | 1.54E-03 | transcription_start_site | + | 62247 | 62247 | -3290 | 9276 | AN1425 |
| 1652 | CONTIG22 | 57231 | 57515 | 1.52 | 8.01E-02 | transcription_start_site | + | 61870 | 61870 | -4497 | 9274 | AN1425 |
| 1652 | CONTIG22 | 57231 | 57515 | 1.52 | 8.01E-02 | transcription_start_site | + | 61995 | 61995 | -4622 | 9275 | AN1425 |
| 1652 | CONTIG22 | 57231 | 57515 | 1.52 | 8.01E-02 | transcription_start_site | + | 62247 | 62247 | -4874 | 9276 | AN1425 |
| 84   | CONTIG22 | 60919 | 61343 | 3.28 | 0.00E+00 | transcription_start_site | + | 65376 | 65376 | -4245 | 9277 | AN1426 |
| 84   | CONTIG22 | 60919 | 61343 | 3.28 | 0.00E+00 | transcription_start_site | + | 65784 | 65784 | -4653 | 9278 | AN1426 |
| 84   | CONTIG22 | 60919 | 61343 | 3.28 | 0.00E+00 | transcription_start_site | + | 65941 | 65941 | -4810 | 9279 | AN1426 |
| 84   | CONTIG22 | 60919 | 61343 | 3.28 | 0.00E+00 | transcription_start_site | + | 66111 | 66111 | -4980 | 9280 | AN1426 |
| 51   | CONTIG22 | 70653 | 71227 | 3.42 | 0.00E+00 | transcription_start_site | - | 69542 | 69542 | -1398 | 9285 | AN1427 |
| 51   | CONTIG22 | 70653 | 71227 | 3.42 | 0.00E+00 | transcription_start_site | - | 68909 | 68909 | -2031 | 9286 | AN1427 |
| 51   | CONTIG22 | 70653 | 71227 | 3.42 | 0.00E+00 | transcription_start_site | - | 68243 | 68243 | -2697 | 9287 | AN1427 |
| 51   | CONTIG22 | 70653 | 71227 | 3.42 | 0.00E+00 | transcription_start_site | - | 68094 | 68094 | -2846 | 9288 | AN1427 |
| 1537 | CONTIG22 | 71933 | 74082 | 1.57 | 7.89E-02 | transcription_start_site | - | 69542 | 69542 | -3465 | 9285 | AN1427 |
| 1537 | CONTIG22 | 71933 | 74082 | 1.57 | 7.89E-02 | transcription_start_site | - | 68909 | 68909 | -4098 | 9286 | AN1427 |
| 1537 | CONTIG22 | 71933 | 74082 | 1.57 | 7.89E-02 | transcription_start_site | - | 68243 | 68243 | -4764 | 9287 | AN1427 |
| 1537 | CONTIG22 | 71933 | 74082 | 1.57 | 7.89E-02 | transcription_start_site | - | 68094 | 68094 | -4913 | 9288 | AN1427 |
| 51   | CONTIG22 | 70653 | 71227 | 3.42 | 0.00E+00 | transcription_start_site | + | 71217 | 71217 | -277  | 9289 | AN1428 |
| 1537 | CONTIG22 | 71933 | 74082 | 1.57 | 7.89E-02 | transcription_start_site | + | 71217 | 71217 | 1790  | 9289 | AN1428 |
| 694  | CONTIG22 | 74568 | 75582 | 2.2  | 3.31E-03 | transcription_start_site | - | 74533 | 74533 | -542  | 9290 | AN1429 |

|      |          |        |        |      |          |                          |   |        |        |       |      |        |
|------|----------|--------|--------|------|----------|--------------------------|---|--------|--------|-------|------|--------|
| 694  | CONTIG22 | 74568  | 75582  | 2.2  | 3.31E-03 | transcription_start_site | - | 74234  | 74234  | -841  | 9291 | AN1429 |
| 805  | CONTIG22 | 78528  | 78817  | 2.1  | 1.11E-02 | transcription_start_site | - | 74533  | 74533  | -4139 | 9290 | AN1429 |
| 805  | CONTIG22 | 78528  | 78817  | 2.1  | 1.11E-02 | transcription_start_site | - | 74234  | 74234  | -4438 | 9291 | AN1429 |
| 1537 | CONTIG22 | 71933  | 74082  | 1.57 | 7.89E-02 | transcription_start_site | - | 74234  | 74234  | 1226  | 9291 | AN1429 |
| 1537 | CONTIG22 | 71933  | 74082  | 1.57 | 7.89E-02 | transcription_start_site | - | 74533  | 74533  | 1525  | 9290 | AN1429 |
| 51   | CONTIG22 | 70653  | 71227  | 3.42 | 0.00E+00 | transcription_start_site | + | 75595  | 75595  | -4655 | 9292 | AN1430 |
| 51   | CONTIG22 | 70653  | 71227  | 3.42 | 0.00E+00 | transcription_start_site | + | 76144  | 76144  | -5204 | 9293 | AN1430 |
| 694  | CONTIG22 | 74568  | 75582  | 2.2  | 3.31E-03 | transcription_start_site | + | 75595  | 75595  | -520  | 9292 | AN1430 |
| 694  | CONTIG22 | 74568  | 75582  | 2.2  | 3.31E-03 | transcription_start_site | + | 76144  | 76144  | -1069 | 9293 | AN1430 |
| 1537 | CONTIG22 | 71933  | 74082  | 1.57 | 7.89E-02 | transcription_start_site | + | 75595  | 75595  | -2587 | 9292 | AN1430 |
| 1537 | CONTIG22 | 71933  | 74082  | 1.57 | 7.89E-02 | transcription_start_site | + | 76144  | 76144  | -3136 | 9293 | AN1430 |
| 694  | CONTIG22 | 74568  | 75582  | 2.2  | 3.31E-03 | transcription_start_site | + | 78413  | 78413  | -3338 | 9294 | AN1431 |
| 694  | CONTIG22 | 74568  | 75582  | 2.2  | 3.31E-03 | transcription_start_site | + | 79295  | 79295  | -4220 | 9295 | AN1431 |
| 805  | CONTIG22 | 78528  | 78817  | 2.1  | 1.11E-02 | transcription_start_site | + | 78413  | 78413  | 259   | 9294 | AN1431 |
| 805  | CONTIG22 | 78528  | 78817  | 2.1  | 1.11E-02 | transcription_start_site | + | 79295  | 79295  | -622  | 9295 | AN1431 |
| 1537 | CONTIG22 | 71933  | 74082  | 1.57 | 7.89E-02 | transcription_start_site | + | 78413  | 78413  | -5405 | 9294 | AN1431 |
| 805  | CONTIG22 | 78528  | 78817  | 2.1  | 1.11E-02 | transcription_start_site | + | 81902  | 81902  | -3229 | 9298 | AN1433 |
| 805  | CONTIG22 | 78528  | 78817  | 2.1  | 1.11E-02 | transcription_start_site | + | 82169  | 82169  | -3496 | 9299 | AN1433 |
| 805  | CONTIG22 | 78528  | 78817  | 2.1  | 1.11E-02 | transcription_start_site | + | 82578  | 82578  | -3905 | 9300 | AN1433 |
| 2451 | CONTIG22 | 103284 | 103568 | 1.22 | 1.93E-01 | transcription_start_site | - | 102965 | 102965 | -461  | 9310 | AN1439 |
| 2451 | CONTIG22 | 103284 | 103568 | 1.22 | 1.93E-01 | transcription_start_site | - | 102764 | 102764 | -662  | 9311 | AN1439 |
| 2451 | CONTIG22 | 103284 | 103568 | 1.22 | 1.93E-01 | transcription_start_site | - | 102584 | 102584 | -842  | 9312 | AN1439 |
| 1886 | CONTIG22 | 108529 | 108878 | 1.42 | 1.08E-01 | transcription_start_site | + | 113852 | 113852 | -5148 | 9313 | AN1442 |
| 2452 | CONTIG22 | 118144 | 118488 | 1.22 | 1.93E-01 | transcription_start_site | - | 116421 | 116421 | -1895 | 9317 | AN1443 |
| 2452 | CONTIG22 | 118144 | 118488 | 1.22 | 1.93E-01 | transcription_start_site | + | 121003 | 121003 | -2687 | 9318 | AN1444 |
| 2452 | CONTIG22 | 118144 | 118488 | 1.22 | 1.93E-01 | transcription_start_site | + | 121197 | 121197 | -2881 | 9319 | AN1444 |
| 2452 | CONTIG22 | 118144 | 118488 | 1.22 | 1.93E-01 | transcription_start_site | + | 121500 | 121500 | -3184 | 9320 | AN1444 |
| 2298 | CONTIG22 | 127218 | 127477 | 1.27 | 1.66E-01 | transcription_start_site | - | 123256 | 123256 | -4091 | 9321 | AN1445 |
| 2298 | CONTIG22 | 127218 | 127477 | 1.27 | 1.66E-01 | transcription_start_site | - | 122994 | 122994 | -4353 | 9322 | AN1445 |
| 2298 | CONTIG22 | 127218 | 127477 | 1.27 | 1.66E-01 | transcription_start_site | - | 122562 | 122562 | -4785 | 9323 | AN1445 |
| 754  | CONTIG22 | 129393 | 131087 | 2.15 | 8.81E-03 | transcription_start_site | - | 125192 | 125192 | -5048 | 9324 | AN1446 |
| 754  | CONTIG22 | 129393 | 131087 | 2.15 | 8.81E-03 | transcription_start_site | - | 124991 | 124991 | -5249 | 9325 | AN1446 |
| 754  | CONTIG22 | 129393 | 131087 | 2.15 | 8.81E-03 | transcription_start_site | - | 124853 | 124853 | -5387 | 9326 | AN1446 |
| 2298 | CONTIG22 | 127218 | 127477 | 1.27 | 1.66E-01 | transcription_start_site | - | 125192 | 125192 | -2155 | 9324 | AN1446 |
| 2298 | CONTIG22 | 127218 | 127477 | 1.27 | 1.66E-01 | transcription_start_site | - | 124991 | 124991 | -2356 | 9325 | AN1446 |
| 2298 | CONTIG22 | 127218 | 127477 | 1.27 | 1.66E-01 | transcription_start_site | - | 124853 | 124853 | -2494 | 9326 | AN1446 |
| 2298 | CONTIG22 | 127218 | 127477 | 1.27 | 1.66E-01 | transcription_start_site | - | 124354 | 124354 | -2993 | 9327 | AN1446 |
| 754  | CONTIG22 | 129393 | 131087 | 2.15 | 8.81E-03 | transcription_start_site | - | 126913 | 126913 | -3327 | 9328 | AN1447 |
| 754  | CONTIG22 | 129393 | 131087 | 2.15 | 8.81E-03 | transcription_start_site | - | 126846 | 126846 | -3394 | 9329 | AN1447 |
| 754  | CONTIG22 | 129393 | 131087 | 2.15 | 8.81E-03 | transcription_start_site | - | 126674 | 126674 | -3566 | 9330 | AN1447 |
| 754  | CONTIG22 | 129393 | 131087 | 2.15 | 8.81E-03 | transcription_start_site | - | 126513 | 126513 | -3727 | 9331 | AN1447 |
| 754  | CONTIG22 | 129393 | 131087 | 2.15 | 8.81E-03 | transcription_start_site | - | 126374 | 126374 | -3866 | 9332 | AN1447 |
| 754  | CONTIG22 | 129393 | 131087 | 2.15 | 8.81E-03 | transcription_start_site | - | 126264 | 126264 | -3976 | 9333 | AN1447 |
| 754  | CONTIG22 | 129393 | 131087 | 2.15 | 8.81E-03 | transcription_start_site | - | 125865 | 125865 | -4375 | 9334 | AN1447 |
| 754  | CONTIG22 | 129393 | 131087 | 2.15 | 8.81E-03 | transcription_start_site | - | 125695 | 125695 | -4545 | 9335 | AN1447 |
| 2298 | CONTIG22 | 127218 | 127477 | 1.27 | 1.66E-01 | transcription_start_site | - | 126913 | 126913 | -434  | 9328 | AN1447 |
| 2298 | CONTIG22 | 127218 | 127477 | 1.27 | 1.66E-01 | transcription_start_site | - | 126846 | 126846 | -501  | 9329 | AN1447 |
| 2298 | CONTIG22 | 127218 | 127477 | 1.27 | 1.66E-01 | transcription_start_site | - | 126674 | 126674 | -673  | 9330 | AN1447 |
| 2298 | CONTIG22 | 127218 | 127477 | 1.27 | 1.66E-01 | transcription_start_site | - | 126513 | 126513 | -834  | 9331 | AN1447 |
| 2298 | CONTIG22 | 127218 | 127477 | 1.27 | 1.66E-01 | transcription_start_site | - | 126374 | 126374 | -973  | 9332 | AN1447 |
| 2298 | CONTIG22 | 127218 | 127477 | 1.27 | 1.66E-01 | transcription_start_site | - | 126264 | 126264 | -1083 | 9333 | AN1447 |
| 2298 | CONTIG22 | 127218 | 127477 | 1.27 | 1.66E-01 | transcription_start_site | - | 125865 | 125865 | -1482 | 9334 | AN1447 |
| 2298 | CONTIG22 | 127218 | 127477 | 1.27 | 1.66E-01 | transcription_start_site | - | 125695 | 125695 | -1652 | 9335 | AN1447 |
| 754  | CONTIG22 | 129393 | 131087 | 2.15 | 8.81E-03 | transcription_start_site | + | 129138 | 129138 | 1102  | 9337 | AN1448 |
| 2298 | CONTIG22 | 127218 | 127477 | 1.27 | 1.66E-01 | transcription_start_site | + | 127352 | 127352 | -4    | 9336 | AN1448 |
| 2298 | CONTIG22 | 127218 | 127477 | 1.27 | 1.66E-01 | transcription_start_site | + | 129138 | 129138 | -1790 | 9337 | AN1448 |
| 754  | CONTIG22 | 129393 | 131087 | 2.15 | 8.81E-03 | transcription_start_site | + | 131291 | 131291 | -1051 | 9338 | AN1449 |

|      |          |        |        |      |          |                          |   |        |        |       |      |        |
|------|----------|--------|--------|------|----------|--------------------------|---|--------|--------|-------|------|--------|
| 754  | CONTIG22 | 129393 | 131087 | 2.15 | 8.81E-03 | transcription_start_site | + | 131557 | 131557 | -1317 | 9339 | AN1449 |
| 2298 | CONTIG22 | 127218 | 127477 | 1.27 | 1.66E-01 | transcription_start_site | + | 131291 | 131291 | -3943 | 9338 | AN1449 |
| 2298 | CONTIG22 | 127218 | 127477 | 1.27 | 1.66E-01 | transcription_start_site | + | 131557 | 131557 | -4209 | 9339 | AN1449 |
| 2299 | CONTIG22 | 135153 | 135437 | 1.27 | 1.66E-01 | transcription_start_site | - | 134466 | 134466 | -829  | 9340 | AN1450 |
| 2299 | CONTIG22 | 135153 | 135437 | 1.27 | 1.66E-01 | transcription_start_site | - | 134243 | 134243 | -1052 | 9341 | AN1450 |
| 2299 | CONTIG22 | 135153 | 135437 | 1.27 | 1.66E-01 | transcription_start_site | + | 140310 | 140310 | -5015 | 9346 | AN1453 |
| 1359 | CONTIG22 | 159464 | 159738 | 1.66 | 5.22E-02 | transcription_start_site | - | 158275 | 158275 | -1326 | 9368 | AN1457 |
| 1359 | CONTIG22 | 159464 | 159738 | 1.66 | 5.22E-02 | transcription_start_site | - | 157217 | 157217 | -2384 | 9369 | AN1457 |
| 1359 | CONTIG22 | 159464 | 159738 | 1.66 | 5.22E-02 | transcription_start_site | - | 156704 | 156704 | -2897 | 9370 | AN1457 |
| 1359 | CONTIG22 | 159464 | 159738 | 1.66 | 5.22E-02 | transcription_start_site | - | 156563 | 156563 | -3038 | 9371 | AN1457 |
| 1359 | CONTIG22 | 159464 | 159738 | 1.66 | 5.22E-02 | transcription_start_site | - | 156464 | 156464 | -3137 | 9372 | AN1457 |
| 1359 | CONTIG22 | 159464 | 159738 | 1.66 | 5.22E-02 | transcription_start_site | + | 160296 | 160296 | -695  | 9373 | AN1458 |
| 1359 | CONTIG22 | 159464 | 159738 | 1.66 | 5.22E-02 | transcription_start_site | + | 161887 | 161887 | -2286 | 9374 | AN1459 |
| 1359 | CONTIG22 | 159464 | 159738 | 1.66 | 5.22E-02 | transcription_start_site | + | 162171 | 162171 | -2570 | 9375 | AN1459 |
| 1359 | CONTIG22 | 159464 | 159738 | 1.66 | 5.22E-02 | transcription_start_site | + | 163865 | 163865 | -4264 | 9376 | AN1459 |
| 1002 | CONTIG22 | 171679 | 172418 | 1.91 | 1.06E-02 | transcription_start_site | + | 172569 | 172569 | -520  | 9386 | AN1462 |
| 1002 | CONTIG22 | 171679 | 172418 | 1.91 | 1.06E-02 | transcription_start_site | + | 170737 | 170737 | 1311  | 9385 | AN1462 |
| 1002 | CONTIG22 | 171679 | 172418 | 1.91 | 1.06E-02 | transcription_start_site | + | 177091 | 177091 | -5042 | 9387 | AN1463 |
| 1002 | CONTIG22 | 171679 | 172418 | 1.91 | 1.06E-02 | transcription_start_site | + | 177201 | 177201 | -5152 | 9388 | AN1463 |
| 1466 | CONTIG22 | 179253 | 179542 | 1.61 | 5.88E-02 | transcription_start_site | + | 178280 | 178280 | 1117  | 9392 | AN1463 |
| 1887 | CONTIG22 | 174304 | 174651 | 1.42 | 1.08E-01 | transcription_start_site | + | 177091 | 177091 | -2613 | 9387 | AN1463 |
| 1887 | CONTIG22 | 174304 | 174651 | 1.42 | 1.08E-01 | transcription_start_site | + | 177201 | 177201 | -2723 | 9388 | AN1463 |
| 1887 | CONTIG22 | 174304 | 174651 | 1.42 | 1.08E-01 | transcription_start_site | + | 177634 | 177634 | -3156 | 9389 | AN1463 |
| 1887 | CONTIG22 | 174304 | 174651 | 1.42 | 1.08E-01 | transcription_start_site | + | 177844 | 177844 | -3366 | 9390 | AN1463 |
| 1887 | CONTIG22 | 174304 | 174651 | 1.42 | 1.08E-01 | transcription_start_site | + | 178075 | 178075 | -3597 | 9391 | AN1463 |
| 1887 | CONTIG22 | 174304 | 174651 | 1.42 | 1.08E-01 | transcription_start_site | + | 178280 | 178280 | -3802 | 9392 | AN1463 |
| 316  | CONTIG22 | 183468 | 183805 | 2.74 | 9.51E-04 | transcription_start_site | + | 184604 | 184604 | -967  | 9393 | AN1465 |
| 316  | CONTIG22 | 183468 | 183805 | 2.74 | 9.51E-04 | transcription_start_site | + | 185073 | 185073 | -1436 | 9394 | AN1465 |
| 316  | CONTIG22 | 183468 | 183805 | 2.74 | 9.51E-04 | transcription_start_site | + | 185659 | 185659 | -2022 | 9395 | AN1465 |
| 316  | CONTIG22 | 183468 | 183805 | 2.74 | 9.51E-04 | transcription_start_site | + | 187696 | 187696 | -4059 | 9396 | AN1466 |
| 316  | CONTIG22 | 183468 | 183805 | 2.74 | 9.51E-04 | transcription_start_site | + | 187980 | 187980 | -4343 | 9397 | AN1466 |
| 316  | CONTIG22 | 183468 | 183805 | 2.74 | 9.51E-04 | transcription_start_site | + | 188521 | 188521 | -4884 | 9398 | AN1466 |
| 2143 | CONTIG22 | 196221 | 196712 | 1.32 | 1.28E-01 | transcription_start_site | - | 192839 | 192839 | -3627 | 9401 | AN1467 |
| 2143 | CONTIG22 | 196221 | 196712 | 1.32 | 1.28E-01 | transcription_start_site | + | 195806 | 195806 | 660   | 9405 | AN1469 |
| 2143 | CONTIG22 | 196221 | 196712 | 1.32 | 1.28E-01 | transcription_start_site | + | 198096 | 198096 | -1629 | 9406 | AN1470 |
| 2143 | CONTIG22 | 196221 | 196712 | 1.32 | 1.28E-01 | transcription_start_site | + | 198302 | 198302 | -1835 | 9407 | AN1470 |
| 530  | CONTIG22 | 201301 | 201650 | 2.4  | 4.46E-04 | transcription_start_site | - | 201617 | 201617 | 141   | 9408 | AN1471 |
| 530  | CONTIG22 | 201301 | 201650 | 2.4  | 4.46E-04 | transcription_start_site | - | 201057 | 201057 | -418  | 9409 | AN1471 |
| 530  | CONTIG22 | 201301 | 201650 | 2.4  | 4.46E-04 | transcription_start_site | + | 203772 | 203772 | -2296 | 9410 | AN1472 |
| 1532 | CONTIG22 | 212483 | 213502 | 1.57 | 6.84E-02 | transcription_start_site | - | 209367 | 209367 | -3625 | 9414 | AN1474 |
| 1532 | CONTIG22 | 212483 | 213502 | 1.57 | 6.84E-02 | transcription_start_site | - | 212846 | 212846 | -146  | 9415 | AN1475 |
| 2300 | CONTIG22 | 217808 | 218087 | 1.27 | 1.66E-01 | transcription_start_site | - | 212846 | 212846 | -5101 | 9415 | AN1475 |
| 2016 | CONTIG22 | 220430 | 220709 | 1.37 | 1.25E-01 | transcription_start_site | - | 220083 | 220083 | -486  | 9417 | AN1477 |
| 2016 | CONTIG22 | 220430 | 220709 | 1.37 | 1.25E-01 | transcription_start_site | - | 221184 | 221184 | 614   | 9416 | AN1477 |
| 1471 | CONTIG23 | 5251   | 5525   | 1.61 | 8.01E-02 | transcription_start_site | + | 5252   | 5252   | 136   | 9464 | AN1494 |
| 1471 | CONTIG23 | 5251   | 5525   | 1.61 | 8.01E-02 | transcription_start_site | + | 4396   | 4396   | 992   | 9463 | AN1494 |
| 1471 | CONTIG23 | 5251   | 5525   | 1.61 | 8.01E-02 | transcription_start_site | - | 6301   | 6301   | 913   | 9469 | AN1495 |
| 1471 | CONTIG23 | 5251   | 5525   | 1.61 | 8.01E-02 | transcription_start_site | - | 6427   | 6427   | 1039  | 9468 | AN1495 |
| 991  | CONTIG23 | 23333  | 23827  | 1.92 | 3.08E-02 | transcription_start_site | - | 18948  | 18948  | -4632 | 9476 | AN1499 |
| 991  | CONTIG23 | 23333  | 23827  | 1.92 | 3.08E-02 | transcription_start_site | - | 18843  | 18843  | -4737 | 9477 | AN1499 |
| 991  | CONTIG23 | 23333  | 23827  | 1.92 | 3.08E-02 | transcription_start_site | - | 18704  | 18704  | -4876 | 9478 | AN1499 |
| 131  | CONTIG23 | 24243  | 24653  | 3.11 | 2.16E-04 | transcription_start_site | - | 21224  | 21224  | -3224 | 9480 | AN1500 |
| 131  | CONTIG23 | 24243  | 24653  | 3.11 | 2.16E-04 | transcription_start_site | - | 20733  | 20733  | -3715 | 9481 | AN1500 |
| 991  | CONTIG23 | 23333  | 23827  | 1.92 | 3.08E-02 | transcription_start_site | - | 21224  | 21224  | -2356 | 9480 | AN1500 |
| 991  | CONTIG23 | 23333  | 23827  | 1.92 | 3.08E-02 | transcription_start_site | - | 20733  | 20733  | -2847 | 9481 | AN1500 |
| 1279 | CONTIG23 | 28671  | 29020  | 1.71 | 3.99E-02 | transcription_start_site | - | 27895  | 27895  | -950  | 9482 | AN1501 |
| 1279 | CONTIG23 | 28671  | 29020  | 1.71 | 3.99E-02 | transcription_start_site | - | 27385  | 27385  | -1460 | 9483 | AN1501 |

|      |          |       |       |      |          |                          |   |       |       |       |      |        |
|------|----------|-------|-------|------|----------|--------------------------|---|-------|-------|-------|------|--------|
| 1279 | CONTIG23 | 28671 | 29020 | 1.71 | 3.99E-02 | transcription_start_site | - | 27167 | 27167 | -1678 | 9484 | AN1501 |
| 1279 | CONTIG23 | 28671 | 29020 | 1.71 | 3.99E-02 | transcription_start_site | - | 26661 | 26661 | -2184 | 9485 | AN1501 |
| 1279 | CONTIG23 | 28671 | 29020 | 1.71 | 3.99E-02 | transcription_start_site | - | 26097 | 26097 | -2748 | 9486 | AN1501 |
| 280  | CONTIG23 | 34446 | 34720 | 2.8  | 1.22E-03 | transcription_start_site | - | 33842 | 33842 | -741  | 9487 | AN1502 |
| 992  | CONTIG23 | 35556 | 36070 | 1.92 | 3.08E-02 | transcription_start_site | - | 33842 | 33842 | -1971 | 9487 | AN1502 |
| 992  | CONTIG23 | 35556 | 36070 | 1.92 | 3.08E-02 | transcription_start_site | - | 36246 | 36246 | 433   | 9488 | AN1503 |
| 1565 | CONTIG23 | 38927 | 39358 | 1.56 | 7.51E-02 | transcription_start_site | - | 36246 | 36246 | -2896 | 9488 | AN1503 |
| 280  | CONTIG23 | 34446 | 34720 | 2.8  | 1.22E-03 | transcription_start_site | + | 37970 | 37970 | -3387 | 9489 | AN1504 |
| 280  | CONTIG23 | 34446 | 34720 | 2.8  | 1.22E-03 | transcription_start_site | + | 38778 | 38778 | -4195 | 9490 | AN1504 |
| 992  | CONTIG23 | 35556 | 36070 | 1.92 | 3.08E-02 | transcription_start_site | + | 37970 | 37970 | -2157 | 9489 | AN1504 |
| 992  | CONTIG23 | 35556 | 36070 | 1.92 | 3.08E-02 | transcription_start_site | + | 38778 | 38778 | -2965 | 9490 | AN1504 |
| 992  | CONTIG23 | 35556 | 36070 | 1.92 | 3.08E-02 | transcription_start_site | + | 39731 | 39731 | -3918 | 9491 | AN1504 |
| 1565 | CONTIG23 | 38927 | 39358 | 1.56 | 7.51E-02 | transcription_start_site | + | 38778 | 38778 | 364   | 9490 | AN1504 |
| 1565 | CONTIG23 | 38927 | 39358 | 1.56 | 7.51E-02 | transcription_start_site | + | 39731 | 39731 | -588  | 9491 | AN1504 |
| 1565 | CONTIG23 | 38927 | 39358 | 1.56 | 7.51E-02 | transcription_start_site | + | 37970 | 37970 | 1172  | 9489 | AN1504 |
| 2067 | CONTIG23 | 42919 | 43352 | 1.35 | 1.66E-01 | transcription_start_site | - | 42909 | 42909 | -226  | 9492 | AN1505 |
| 2067 | CONTIG23 | 42919 | 43352 | 1.35 | 1.66E-01 | transcription_start_site | - | 42631 | 42631 | -504  | 9493 | AN1505 |
| 2067 | CONTIG23 | 42919 | 43352 | 1.35 | 1.66E-01 | transcription_start_site | - | 42463 | 42463 | -672  | 9494 | AN1505 |
| 2067 | CONTIG23 | 42919 | 43352 | 1.35 | 1.66E-01 | transcription_start_site | - | 42078 | 42078 | -1057 | 9495 | AN1505 |
| 2067 | CONTIG23 | 42919 | 43352 | 1.35 | 1.66E-01 | transcription_start_site | - | 41879 | 41879 | -1256 | 9496 | AN1505 |
| 2067 | CONTIG23 | 42919 | 43352 | 1.35 | 1.66E-01 | transcription_start_site | - | 41609 | 41609 | -1526 | 9497 | AN1505 |
| 1565 | CONTIG23 | 38927 | 39358 | 1.56 | 7.51E-02 | transcription_start_site | + | 44167 | 44167 | -5024 | 9498 | AN1506 |
| 2067 | CONTIG23 | 42919 | 43352 | 1.35 | 1.66E-01 | transcription_start_site | + | 44167 | 44167 | -1031 | 9498 | AN1506 |
| 2067 | CONTIG23 | 42919 | 43352 | 1.35 | 1.66E-01 | transcription_start_site | + | 44396 | 44396 | -1260 | 9499 | AN1506 |
| 2067 | CONTIG23 | 42919 | 43352 | 1.35 | 1.66E-01 | transcription_start_site | + | 45084 | 45084 | -1948 | 9500 | AN1506 |
| 2067 | CONTIG23 | 42919 | 43352 | 1.35 | 1.66E-01 | transcription_start_site | + | 45360 | 45360 | -2224 | 9501 | AN1506 |
| 2067 | CONTIG23 | 42919 | 43352 | 1.35 | 1.66E-01 | transcription_start_site | + | 45507 | 45507 | -2371 | 9502 | AN1506 |
| 882  | CONTIG23 | 50327 | 50676 | 2.02 | 2.12E-02 | transcription_start_site | - | 46778 | 46778 | -3723 | 9503 | AN1507 |
| 882  | CONTIG23 | 50327 | 50676 | 2.02 | 2.12E-02 | transcription_start_site | - | 46697 | 46697 | -3804 | 9504 | AN1507 |
| 993  | CONTIG23 | 49667 | 49934 | 1.92 | 3.08E-02 | transcription_start_site | - | 46778 | 46778 | -3022 | 9503 | AN1507 |
| 993  | CONTIG23 | 49667 | 49934 | 1.92 | 3.08E-02 | transcription_start_site | - | 46697 | 46697 | -3103 | 9504 | AN1507 |
| 882  | CONTIG23 | 50327 | 50676 | 2.02 | 2.12E-02 | transcription_start_site | - | 48214 | 48214 | -2287 | 9505 | AN1508 |
| 882  | CONTIG23 | 50327 | 50676 | 2.02 | 2.12E-02 | transcription_start_site | - | 47911 | 47911 | -2590 | 9506 | AN1508 |
| 882  | CONTIG23 | 50327 | 50676 | 2.02 | 2.12E-02 | transcription_start_site | - | 47751 | 47751 | -2750 | 9507 | AN1508 |
| 882  | CONTIG23 | 50327 | 50676 | 2.02 | 2.12E-02 | transcription_start_site | - | 47632 | 47632 | -2869 | 9508 | AN1508 |
| 993  | CONTIG23 | 49667 | 49934 | 1.92 | 3.08E-02 | transcription_start_site | - | 48214 | 48214 | -1586 | 9505 | AN1508 |
| 993  | CONTIG23 | 49667 | 49934 | 1.92 | 3.08E-02 | transcription_start_site | - | 47911 | 47911 | -1889 | 9506 | AN1508 |
| 993  | CONTIG23 | 49667 | 49934 | 1.92 | 3.08E-02 | transcription_start_site | - | 47751 | 47751 | -2049 | 9507 | AN1508 |
| 993  | CONTIG23 | 49667 | 49934 | 1.92 | 3.08E-02 | transcription_start_site | - | 47632 | 47632 | -2168 | 9508 | AN1508 |
| 882  | CONTIG23 | 50327 | 50676 | 2.02 | 2.12E-02 | transcription_start_site | + | 50799 | 50799 | -297  | 9509 | AN1509 |
| 882  | CONTIG23 | 50327 | 50676 | 2.02 | 2.12E-02 | transcription_start_site | + | 51434 | 51434 | -932  | 9510 | AN1509 |
| 993  | CONTIG23 | 49667 | 49934 | 1.92 | 3.08E-02 | transcription_start_site | + | 50799 | 50799 | -998  | 9509 | AN1509 |
| 993  | CONTIG23 | 49667 | 49934 | 1.92 | 3.08E-02 | transcription_start_site | + | 51434 | 51434 | -1633 | 9510 | AN1509 |
| 882  | CONTIG23 | 50327 | 50676 | 2.02 | 2.12E-02 | transcription_start_site | + | 53235 | 53235 | -2733 | 9511 | AN1510 |
| 882  | CONTIG23 | 50327 | 50676 | 2.02 | 2.12E-02 | transcription_start_site | + | 53399 | 53399 | -2897 | 9512 | AN1510 |
| 882  | CONTIG23 | 50327 | 50676 | 2.02 | 2.12E-02 | transcription_start_site | + | 55028 | 55028 | -4526 | 9513 | AN1510 |
| 993  | CONTIG23 | 49667 | 49934 | 1.92 | 3.08E-02 | transcription_start_site | + | 53235 | 53235 | -3434 | 9511 | AN1510 |
| 993  | CONTIG23 | 49667 | 49934 | 1.92 | 3.08E-02 | transcription_start_site | + | 53399 | 53399 | -3598 | 9512 | AN1510 |
| 882  | CONTIG23 | 50327 | 50676 | 2.02 | 2.12E-02 | transcription_start_site | + | 55568 | 55568 | -5066 | 9514 | AN1511 |
| 229  | CONTIG24 | 16967 | 17226 | 2.88 | 0.00E+00 | transcription_start_site | - | 12431 | 12431 | -4665 | 9525 | AN1517 |
| 229  | CONTIG24 | 16967 | 17226 | 2.88 | 0.00E+00 | transcription_start_site | - | 12367 | 12367 | -4729 | 9526 | AN1517 |
| 229  | CONTIG24 | 16967 | 17226 | 2.88 | 0.00E+00 | transcription_start_site | - | 15908 | 15908 | -1188 | 9528 | AN1518 |
| 229  | CONTIG24 | 16967 | 17226 | 2.88 | 0.00E+00 | transcription_start_site | - | 15731 | 15731 | -1365 | 9529 | AN1518 |
| 229  | CONTIG24 | 16967 | 17226 | 2.88 | 0.00E+00 | transcription_start_site | - | 15265 | 15265 | -1831 | 9530 | AN1518 |
| 229  | CONTIG24 | 16967 | 17226 | 2.88 | 0.00E+00 | transcription_start_site | - | 14987 | 14987 | -2109 | 9531 | AN1518 |
| 229  | CONTIG24 | 16967 | 17226 | 2.88 | 0.00E+00 | transcription_start_site | - | 14902 | 14902 | -2194 | 9532 | AN1518 |
| 229  | CONTIG24 | 16967 | 17226 | 2.88 | 0.00E+00 | transcription_start_site | - | 14079 | 14079 | -3017 | 9533 | AN1518 |



|      |          |       |       |      |          |                          |   |       |       |       |      |        |
|------|----------|-------|-------|------|----------|--------------------------|---|-------|-------|-------|------|--------|
| 229  | CONTIG24 | 16967 | 17226 | 2.88 | 0.00E+00 | transcription_start_site | - | 13315 | 13315 | -3781 | 9534 | AN1518 |
| 229  | CONTIG24 | 16967 | 17226 | 2.88 | 0.00E+00 | transcription_start_site | + | 18263 | 18263 | -1166 | 9535 | AN1519 |
| 229  | CONTIG24 | 16967 | 17226 | 2.88 | 0.00E+00 | transcription_start_site | + | 18574 | 18574 | -1477 | 9536 | AN1519 |
| 229  | CONTIG24 | 16967 | 17226 | 2.88 | 0.00E+00 | transcription_start_site | + | 19727 | 19727 | -2630 | 9537 | AN1519 |
| 229  | CONTIG24 | 16967 | 17226 | 2.88 | 0.00E+00 | transcription_start_site | + | 20027 | 20027 | -2930 | 9538 | AN1519 |
| 1685 | CONTIG24 | 23043 | 24282 | 1.5  | 1.70E-02 | transcription_start_site | - | 23603 | 23603 | -59   | 9540 | AN1520 |
| 1685 | CONTIG24 | 23043 | 24282 | 1.5  | 1.70E-02 | transcription_start_site | - | 23979 | 23979 | 316   | 9539 | AN1520 |
| 1976 | CONTIG24 | 27618 | 27967 | 1.38 | 5.88E-02 | transcription_start_site | - | 23979 | 23979 | -3813 | 9539 | AN1520 |
| 1976 | CONTIG24 | 27618 | 27967 | 1.38 | 5.88E-02 | transcription_start_site | - | 23603 | 23603 | -4189 | 9540 | AN1520 |
| 1685 | CONTIG24 | 23043 | 24282 | 1.5  | 1.70E-02 | transcription_start_site | - | 24969 | 24969 | 1306  | 9544 | AN1521 |
| 1685 | CONTIG24 | 23043 | 24282 | 1.5  | 1.70E-02 | transcription_start_site | - | 25201 | 25201 | 1538  | 9543 | AN1521 |
| 1976 | CONTIG24 | 27618 | 27967 | 1.38 | 5.88E-02 | transcription_start_site | - | 25640 | 25640 | -2152 | 9541 | AN1521 |
| 1976 | CONTIG24 | 27618 | 27967 | 1.38 | 5.88E-02 | transcription_start_site | - | 25342 | 25342 | -2450 | 9542 | AN1521 |
| 1976 | CONTIG24 | 27618 | 27967 | 1.38 | 5.88E-02 | transcription_start_site | - | 25201 | 25201 | -2591 | 9543 | AN1521 |
| 1976 | CONTIG24 | 27618 | 27967 | 1.38 | 5.88E-02 | transcription_start_site | - | 24969 | 24969 | -2823 | 9544 | AN1521 |
| 1685 | CONTIG24 | 23043 | 24282 | 1.5  | 1.70E-02 | transcription_start_site | + | 26411 | 26411 | -2748 | 9545 | AN1522 |
| 1685 | CONTIG24 | 23043 | 24282 | 1.5  | 1.70E-02 | transcription_start_site | + | 26582 | 26582 | -2919 | 9546 | AN1522 |
| 1685 | CONTIG24 | 23043 | 24282 | 1.5  | 1.70E-02 | transcription_start_site | + | 26705 | 26705 | -3042 | 9547 | AN1522 |
| 1976 | CONTIG24 | 27618 | 27967 | 1.38 | 5.88E-02 | transcription_start_site | + | 26705 | 26705 | 1087  | 9547 | AN1522 |
| 1685 | CONTIG24 | 23043 | 24282 | 1.5  | 1.70E-02 | transcription_start_site | + | 28102 | 28102 | -4439 | 9548 | AN1523 |
| 1685 | CONTIG24 | 23043 | 24282 | 1.5  | 1.70E-02 | transcription_start_site | + | 28353 | 28353 | -4690 | 9549 | AN1523 |
| 1685 | CONTIG24 | 23043 | 24282 | 1.5  | 1.70E-02 | transcription_start_site | + | 28659 | 28659 | -4996 | 9550 | AN1523 |
| 1685 | CONTIG24 | 23043 | 24282 | 1.5  | 1.70E-02 | transcription_start_site | + | 28772 | 28772 | -5109 | 9551 | AN1523 |
| 1685 | CONTIG24 | 23043 | 24282 | 1.5  | 1.70E-02 | transcription_start_site | + | 28955 | 28955 | -5292 | 9552 | AN1523 |
| 1976 | CONTIG24 | 27618 | 27967 | 1.38 | 5.88E-02 | transcription_start_site | + | 28102 | 28102 | -309  | 9548 | AN1523 |
| 1976 | CONTIG24 | 27618 | 27967 | 1.38 | 5.88E-02 | transcription_start_site | + | 28353 | 28353 | -560  | 9549 | AN1523 |
| 1976 | CONTIG24 | 27618 | 27967 | 1.38 | 5.88E-02 | transcription_start_site | + | 28659 | 28659 | -866  | 9550 | AN1523 |
| 1976 | CONTIG24 | 27618 | 27967 | 1.38 | 5.88E-02 | transcription_start_site | + | 28772 | 28772 | -979  | 9551 | AN1523 |
| 1976 | CONTIG24 | 27618 | 27967 | 1.38 | 5.88E-02 | transcription_start_site | + | 28955 | 28955 | -1162 | 9552 | AN1523 |
| 1976 | CONTIG24 | 27618 | 27967 | 1.38 | 5.88E-02 | transcription_start_site | + | 31081 | 31081 | -3288 | 9553 | AN1524 |
| 1976 | CONTIG24 | 27618 | 27967 | 1.38 | 5.88E-02 | transcription_start_site | + | 31437 | 31437 | -3644 | 9554 | AN1524 |
| 1976 | CONTIG24 | 27618 | 27967 | 1.38 | 5.88E-02 | transcription_start_site | + | 32128 | 32128 | -4335 | 9555 | AN1524 |
| 1976 | CONTIG24 | 27618 | 27967 | 1.38 | 5.88E-02 | transcription_start_site | + | 32272 | 32272 | -4479 | 9556 | AN1524 |
| 2505 | CONTIG25 | 1966  | 2381  | 1.2  | 8.01E-02 | transcription_start_site | - | 1406  | 1406  | -767  | 9577 | AN1531 |
| 2505 | CONTIG25 | 1966  | 2381  | 1.2  | 8.01E-02 | transcription_start_site | - | 1105  | 1105  | -1068 | 9578 | AN1531 |
| 2505 | CONTIG25 | 1966  | 2381  | 1.2  | 8.01E-02 | transcription_start_site | - | 3035  | 3035  | 861   | 9580 | AN1532 |
| 2505 | CONTIG25 | 1966  | 2381  | 1.2  | 8.01E-02 | transcription_start_site | - | 3223  | 3223  | 1049  | 9579 | AN1532 |
| 1168 | CONTIG25 | 8866  | 9125  | 1.78 | 6.61E-03 | transcription_start_site | - | 7127  | 7127  | -1868 | 9581 | AN1533 |
| 1168 | CONTIG25 | 8866  | 9125  | 1.78 | 6.61E-03 | transcription_start_site | - | 6668  | 6668  | -2327 | 9582 | AN1533 |
| 1168 | CONTIG25 | 8866  | 9125  | 1.78 | 6.61E-03 | transcription_start_site | - | 6398  | 6398  | -2597 | 9583 | AN1533 |
| 1168 | CONTIG25 | 8866  | 9125  | 1.78 | 6.61E-03 | transcription_start_site | - | 5200  | 5200  | -3795 | 9584 | AN1533 |
| 1168 | CONTIG25 | 8866  | 9125  | 1.78 | 6.61E-03 | transcription_start_site | + | 8277  | 8277  | 718   | 9588 | AN1534 |
| 1168 | CONTIG25 | 8866  | 9125  | 1.78 | 6.61E-03 | transcription_start_site | + | 7996  | 7996  | 999   | 9587 | AN1534 |
| 2505 | CONTIG25 | 1966  | 2381  | 1.2  | 8.01E-02 | transcription_start_site | + | 7370  | 7370  | -5196 | 9585 | AN1534 |
| 1168 | CONTIG25 | 8866  | 9125  | 1.78 | 6.61E-03 | transcription_start_site | + | 9237  | 9237  | -241  | 9589 | AN1535 |
| 1168 | CONTIG25 | 8866  | 9125  | 1.78 | 6.61E-03 | transcription_start_site | + | 9842  | 9842  | -846  | 9590 | AN1535 |
| 1168 | CONTIG25 | 8866  | 9125  | 1.78 | 6.61E-03 | transcription_start_site | + | 9952  | 9952  | -956  | 9591 | AN1535 |
| 1168 | CONTIG25 | 8866  | 9125  | 1.78 | 6.61E-03 | transcription_start_site | + | 10112 | 10112 | -1116 | 9592 | AN1535 |
| 1168 | CONTIG25 | 8866  | 9125  | 1.78 | 6.61E-03 | transcription_start_site | + | 10567 | 10567 | -1571 | 9593 | AN1535 |
| 1168 | CONTIG25 | 8866  | 9125  | 1.78 | 6.61E-03 | transcription_start_site | + | 10978 | 10978 | -1982 | 9594 | AN1535 |
| 2825 | CONTIG25 | 35180 | 35619 | 1.05 | 1.44E-01 | transcription_start_site | + | 38115 | 38115 | -2715 | 9614 | AN1543 |
| 2825 | CONTIG25 | 35180 | 35619 | 1.05 | 1.44E-01 | transcription_start_site | + | 38218 | 38218 | -2818 | 9615 | AN1543 |
| 2825 | CONTIG25 | 35180 | 35619 | 1.05 | 1.44E-01 | transcription_start_site | + | 38401 | 38401 | -3001 | 9616 | AN1543 |
| 2825 | CONTIG25 | 35180 | 35619 | 1.05 | 1.44E-01 | transcription_start_site | + | 38696 | 38696 | -3296 | 9617 | AN1543 |
| 2825 | CONTIG25 | 35180 | 35619 | 1.05 | 1.44E-01 | transcription_start_site | + | 40194 | 40194 | -4794 | 9618 | AN1543 |
| 1666 | CONTIG25 | 42080 | 42429 | 1.51 | 1.06E-02 | transcription_start_site | - | 41714 | 41714 | -540  | 9619 | AN1544 |
| 2778 | CONTIG25 | 45380 | 45654 | 1.08 | 1.25E-01 | transcription_start_site | - | 41714 | 41714 | -3803 | 9619 | AN1544 |

|      |          |       |       |      |          |                          |   |       |       |       |      |        |
|------|----------|-------|-------|------|----------|--------------------------|---|-------|-------|-------|------|--------|
| 2826 | CONTIG25 | 46065 | 46329 | 1.05 | 1.44E-01 | transcription_start_site | - | 41714 | 41714 | -4483 | 9619 | AN1544 |
| 1666 | CONTIG25 | 42080 | 42429 | 1.51 | 1.06E-02 | transcription_start_site | + | 42956 | 42956 | -701  | 9620 | AN1545 |
| 1666 | CONTIG25 | 42080 | 42429 | 1.51 | 1.06E-02 | transcription_start_site | + | 43170 | 43170 | -915  | 9621 | AN1545 |
| 1666 | CONTIG25 | 42080 | 42429 | 1.51 | 1.06E-02 | transcription_start_site | + | 43276 | 43276 | -1021 | 9622 | AN1545 |
| 1666 | CONTIG25 | 42080 | 42429 | 1.51 | 1.06E-02 | transcription_start_site | + | 43433 | 43433 | -1178 | 9623 | AN1545 |
| 1666 | CONTIG25 | 42080 | 42429 | 1.51 | 1.06E-02 | transcription_start_site | + | 44148 | 44148 | -1893 | 9624 | AN1545 |
| 1666 | CONTIG25 | 42080 | 42429 | 1.51 | 1.06E-02 | transcription_start_site | + | 44773 | 44773 | -2518 | 9625 | AN1545 |
| 2778 | CONTIG25 | 45380 | 45654 | 1.08 | 1.25E-01 | transcription_start_site | + | 44773 | 44773 | 744   | 9625 | AN1545 |
| 1666 | CONTIG25 | 42080 | 42429 | 1.51 | 1.06E-02 | transcription_start_site | + | 46007 | 46007 | -3752 | 9626 | AN1546 |
| 1666 | CONTIG25 | 42080 | 42429 | 1.51 | 1.06E-02 | transcription_start_site | + | 46178 | 46178 | -3923 | 9627 | AN1546 |
| 1666 | CONTIG25 | 42080 | 42429 | 1.51 | 1.06E-02 | transcription_start_site | + | 46322 | 46322 | -4067 | 9628 | AN1546 |
| 1666 | CONTIG25 | 42080 | 42429 | 1.51 | 1.06E-02 | transcription_start_site | + | 47026 | 47026 | -4771 | 9629 | AN1546 |
| 1666 | CONTIG25 | 42080 | 42429 | 1.51 | 1.06E-02 | transcription_start_site | + | 47192 | 47192 | -4937 | 9630 | AN1546 |
| 2778 | CONTIG25 | 45380 | 45654 | 1.08 | 1.25E-01 | transcription_start_site | + | 46007 | 46007 | -490  | 9626 | AN1546 |
| 2778 | CONTIG25 | 45380 | 45654 | 1.08 | 1.25E-01 | transcription_start_site | + | 46178 | 46178 | -661  | 9627 | AN1546 |
| 2778 | CONTIG25 | 45380 | 45654 | 1.08 | 1.25E-01 | transcription_start_site | + | 46322 | 46322 | -805  | 9628 | AN1546 |
| 2778 | CONTIG25 | 45380 | 45654 | 1.08 | 1.25E-01 | transcription_start_site | + | 47026 | 47026 | -1509 | 9629 | AN1546 |
| 2778 | CONTIG25 | 45380 | 45654 | 1.08 | 1.25E-01 | transcription_start_site | + | 47192 | 47192 | -1675 | 9630 | AN1546 |
| 2778 | CONTIG25 | 45380 | 45654 | 1.08 | 1.25E-01 | transcription_start_site | + | 47946 | 47946 | -2429 | 9631 | AN1546 |
| 2778 | CONTIG25 | 45380 | 45654 | 1.08 | 1.25E-01 | transcription_start_site | + | 48635 | 48635 | -3118 | 9632 | AN1546 |
| 2826 | CONTIG25 | 46065 | 46329 | 1.05 | 1.44E-01 | transcription_start_site | + | 46178 | 46178 | 19    | 9627 | AN1546 |
| 2826 | CONTIG25 | 46065 | 46329 | 1.05 | 1.44E-01 | transcription_start_site | + | 46322 | 46322 | -125  | 9628 | AN1546 |
| 2826 | CONTIG25 | 46065 | 46329 | 1.05 | 1.44E-01 | transcription_start_site | + | 46007 | 46007 | 190   | 9626 | AN1546 |
| 2826 | CONTIG25 | 46065 | 46329 | 1.05 | 1.44E-01 | transcription_start_site | + | 47026 | 47026 | -829  | 9629 | AN1546 |
| 2826 | CONTIG25 | 46065 | 46329 | 1.05 | 1.44E-01 | transcription_start_site | + | 47192 | 47192 | -995  | 9630 | AN1546 |
| 2826 | CONTIG25 | 46065 | 46329 | 1.05 | 1.44E-01 | transcription_start_site | + | 47946 | 47946 | -1749 | 9631 | AN1546 |
| 2826 | CONTIG25 | 46065 | 46329 | 1.05 | 1.44E-01 | transcription_start_site | + | 48635 | 48635 | -2438 | 9632 | AN1546 |
| 2826 | CONTIG25 | 46065 | 46329 | 1.05 | 1.44E-01 | transcription_start_site | + | 50784 | 50784 | -4587 | 9633 | AN1546 |
| 1395 | CONTIG25 | 51977 | 52416 | 1.63 | 1.30E-02 | transcription_start_site | + | 52665 | 52665 | -468  | 9634 | AN1547 |
| 1395 | CONTIG25 | 51977 | 52416 | 1.63 | 1.30E-02 | transcription_start_site | + | 52858 | 52858 | -661  | 9635 | AN1547 |
| 1395 | CONTIG25 | 51977 | 52416 | 1.63 | 1.30E-02 | transcription_start_site | + | 53147 | 53147 | -950  | 9636 | AN1547 |
| 1931 | CONTIG25 | 53417 | 53916 | 1.39 | 2.18E-02 | transcription_start_site | + | 53147 | 53147 | 519   | 9636 | AN1547 |
| 1931 | CONTIG25 | 53417 | 53916 | 1.39 | 2.18E-02 | transcription_start_site | + | 52858 | 52858 | 808   | 9635 | AN1547 |
| 1931 | CONTIG25 | 53417 | 53916 | 1.39 | 2.18E-02 | transcription_start_site | + | 52665 | 52665 | 1001  | 9634 | AN1547 |
| 1395 | CONTIG25 | 51977 | 52416 | 1.63 | 1.30E-02 | transcription_start_site | + | 55018 | 55018 | -2821 | 9637 | AN1548 |
| 1395 | CONTIG25 | 51977 | 52416 | 1.63 | 1.30E-02 | transcription_start_site | + | 55406 | 55406 | -3209 | 9638 | AN1548 |
| 1931 | CONTIG25 | 53417 | 53916 | 1.39 | 2.18E-02 | transcription_start_site | + | 55018 | 55018 | -1351 | 9637 | AN1548 |
| 1931 | CONTIG25 | 53417 | 53916 | 1.39 | 2.18E-02 | transcription_start_site | + | 55406 | 55406 | -1739 | 9638 | AN1548 |
| 447  | CONTIG25 | 63307 | 63662 | 2.52 | 0.00E+00 | transcription_start_site | - | 61347 | 61347 | -2137 | 9642 | AN1550 |
| 447  | CONTIG25 | 63307 | 63662 | 2.52 | 0.00E+00 | transcription_start_site | - | 61133 | 61133 | -2351 | 9643 | AN1550 |
| 447  | CONTIG25 | 63307 | 63662 | 2.52 | 0.00E+00 | transcription_start_site | - | 59697 | 59697 | -3787 | 9644 | AN1550 |
| 1169 | CONTIG25 | 64578 | 65237 | 1.78 | 6.61E-03 | transcription_start_site | - | 61347 | 61347 | -3560 | 9642 | AN1550 |
| 1169 | CONTIG25 | 64578 | 65237 | 1.78 | 6.61E-03 | transcription_start_site | - | 61133 | 61133 | -3774 | 9643 | AN1550 |
| 1169 | CONTIG25 | 64578 | 65237 | 1.78 | 6.61E-03 | transcription_start_site | - | 59697 | 59697 | -5210 | 9644 | AN1550 |
| 447  | CONTIG25 | 63307 | 63662 | 2.52 | 0.00E+00 | transcription_start_site | - | 63878 | 63878 | 393   | 9646 | AN1551 |
| 447  | CONTIG25 | 63307 | 63662 | 2.52 | 0.00E+00 | transcription_start_site | - | 64115 | 64115 | 630   | 9645 | AN1551 |
| 1169 | CONTIG25 | 64578 | 65237 | 1.78 | 6.61E-03 | transcription_start_site | - | 64115 | 64115 | -792  | 9645 | AN1551 |
| 1169 | CONTIG25 | 64578 | 65237 | 1.78 | 6.61E-03 | transcription_start_site | - | 63878 | 63878 | -1029 | 9646 | AN1551 |
| 447  | CONTIG25 | 63307 | 63662 | 2.52 | 0.00E+00 | transcription_start_site | + | 67610 | 67610 | -4125 | 9647 | AN1552 |
| 447  | CONTIG25 | 63307 | 63662 | 2.52 | 0.00E+00 | transcription_start_site | + | 67818 | 67818 | -4333 | 9648 | AN1552 |
| 447  | CONTIG25 | 63307 | 63662 | 2.52 | 0.00E+00 | transcription_start_site | + | 67879 | 67879 | -4394 | 9649 | AN1552 |
| 1169 | CONTIG25 | 64578 | 65237 | 1.78 | 6.61E-03 | transcription_start_site | + | 67610 | 67610 | -2702 | 9647 | AN1552 |
| 1169 | CONTIG25 | 64578 | 65237 | 1.78 | 6.61E-03 | transcription_start_site | + | 67818 | 67818 | -2910 | 9648 | AN1552 |
| 1169 | CONTIG25 | 64578 | 65237 | 1.78 | 6.61E-03 | transcription_start_site | + | 67879 | 67879 | -2971 | 9649 | AN1552 |
| 448  | CONTIG25 | 70427 | 70926 | 2.52 | 0.00E+00 | transcription_start_site | - | 70182 | 70182 | -494  | 9650 | AN1553 |
| 448  | CONTIG25 | 70427 | 70926 | 2.52 | 0.00E+00 | transcription_start_site | - | 69733 | 69733 | -943  | 9651 | AN1553 |
| 2037 | CONTIG25 | 72682 | 73411 | 1.36 | 4.36E-02 | transcription_start_site | - | 70182 | 70182 | -2864 | 9650 | AN1553 |

|               |        |        |      |          |                          |   |        |        |       |             |
|---------------|--------|--------|------|----------|--------------------------|---|--------|--------|-------|-------------|
| 2037 CONTIG25 | 72682  | 73411  | 1.36 | 4.36E-02 | transcription_start_site | - | 69733  | 69733  | -3313 | 9651 AN1553 |
| 448 CONTIG25  | 70427  | 70926  | 2.52 | 0.00E+00 | transcription_start_site | - | 71106  | 71106  | 429   | 9654 AN1554 |
| 448 CONTIG25  | 70427  | 70926  | 2.52 | 0.00E+00 | transcription_start_site | - | 71372  | 71372  | 695   | 9653 AN1554 |
| 2037 CONTIG25 | 72682  | 73411  | 1.36 | 4.36E-02 | transcription_start_site | - | 73287  | 73287  | 240   | 9652 AN1554 |
| 2037 CONTIG25 | 72682  | 73411  | 1.36 | 4.36E-02 | transcription_start_site | - | 71372  | 71372  | -1674 | 9653 AN1554 |
| 2037 CONTIG25 | 72682  | 73411  | 1.36 | 4.36E-02 | transcription_start_site | - | 71106  | 71106  | -1940 | 9654 AN1554 |
| 2499 CONTIG25 | 75755  | 76109  | 1.2  | 6.16E-02 | transcription_start_site | - | 73287  | 73287  | -2645 | 9652 AN1554 |
| 2499 CONTIG25 | 75755  | 76109  | 1.2  | 6.16E-02 | transcription_start_site | - | 71372  | 71372  | -4560 | 9653 AN1554 |
| 2499 CONTIG25 | 75755  | 76109  | 1.2  | 6.16E-02 | transcription_start_site | - | 71106  | 71106  | -4826 | 9654 AN1554 |
| 2037 CONTIG25 | 72682  | 73411  | 1.36 | 4.36E-02 | transcription_start_site | + | 77614  | 77614  | -4567 | 9655 AN1555 |
| 2499 CONTIG25 | 75755  | 76109  | 1.2  | 6.16E-02 | transcription_start_site | + | 77614  | 77614  | -1682 | 9655 AN1555 |
| 2499 CONTIG25 | 75755  | 76109  | 1.2  | 6.16E-02 | transcription_start_site | + | 80358  | 80358  | -4426 | 9656 AN1555 |
| 2607 CONTIG25 | 86495  | 86979  | 1.16 | 9.24E-02 | transcription_start_site | + | 87224  | 87224  | -487  | 9658 AN1557 |
| 2607 CONTIG25 | 86495  | 86979  | 1.16 | 9.24E-02 | transcription_start_site | + | 87376  | 87376  | -639  | 9659 AN1557 |
| 2607 CONTIG25 | 86495  | 86979  | 1.16 | 9.24E-02 | transcription_start_site | + | 87972  | 87972  | -1235 | 9660 AN1557 |
| 2607 CONTIG25 | 86495  | 86979  | 1.16 | 9.24E-02 | transcription_start_site | + | 88034  | 88034  | -1297 | 9661 AN1557 |
| 2607 CONTIG25 | 86495  | 86979  | 1.16 | 9.24E-02 | transcription_start_site | + | 88801  | 88801  | -2064 | 9662 AN1557 |
| 2894 CONTIG25 | 85205  | 85494  | 1.01 | 1.66E-01 | transcription_start_site | + | 87224  | 87224  | -1874 | 9658 AN1557 |
| 2894 CONTIG25 | 85205  | 85494  | 1.01 | 1.66E-01 | transcription_start_site | + | 87376  | 87376  | -2026 | 9659 AN1557 |
| 2894 CONTIG25 | 85205  | 85494  | 1.01 | 1.66E-01 | transcription_start_site | + | 87972  | 87972  | -2622 | 9660 AN1557 |
| 2894 CONTIG25 | 85205  | 85494  | 1.01 | 1.66E-01 | transcription_start_site | + | 88034  | 88034  | -2684 | 9661 AN1557 |
| 2894 CONTIG25 | 85205  | 85494  | 1.01 | 1.66E-01 | transcription_start_site | + | 88801  | 88801  | -3451 | 9662 AN1557 |
| 2031 CONTIG25 | 90090  | 90579  | 1.36 | 2.64E-02 | transcription_start_site | - | 90219  | 90219  | -115  | 9671 AN1558 |
| 2031 CONTIG25 | 90090  | 90579  | 1.36 | 2.64E-02 | transcription_start_site | - | 90790  | 90790  | 455   | 9670 AN1558 |
| 2031 CONTIG25 | 90090  | 90579  | 1.36 | 2.64E-02 | transcription_start_site | - | 91084  | 91084  | 749   | 9669 AN1558 |
| 2031 CONTIG25 | 90090  | 90579  | 1.36 | 2.64E-02 | transcription_start_site | - | 91220  | 91220  | 885   | 9668 AN1558 |
| 2955 CONTIG25 | 96245  | 96509  | 0.97 | 1.93E-01 | transcription_start_site | - | 93986  | 93986  | -2391 | 9663 AN1558 |
| 2955 CONTIG25 | 96245  | 96509  | 0.97 | 1.93E-01 | transcription_start_site | - | 93905  | 93905  | -2472 | 9664 AN1558 |
| 2955 CONTIG25 | 96245  | 96509  | 0.97 | 1.93E-01 | transcription_start_site | - | 93603  | 93603  | -2774 | 9665 AN1558 |
| 2955 CONTIG25 | 96245  | 96509  | 0.97 | 1.93E-01 | transcription_start_site | - | 93498  | 93498  | -2879 | 9666 AN1558 |
| 2955 CONTIG25 | 96245  | 96509  | 0.97 | 1.93E-01 | transcription_start_site | - | 92965  | 92965  | -3412 | 9667 AN1558 |
| 2506 CONTIG25 | 101345 | 101619 | 1.2  | 8.01E-02 | transcription_start_site | - | 96597  | 96597  | -4885 | 9672 AN1559 |
| 2506 CONTIG25 | 101345 | 101619 | 1.2  | 8.01E-02 | transcription_start_site | - | 96473  | 96473  | -5009 | 9673 AN1559 |
| 2955 CONTIG25 | 96245  | 96509  | 0.97 | 1.93E-01 | transcription_start_site | - | 96473  | 96473  | 96    | 9673 AN1559 |
| 2955 CONTIG25 | 96245  | 96509  | 0.97 | 1.93E-01 | transcription_start_site | - | 96597  | 96597  | 220   | 9672 AN1559 |
| 2955 CONTIG25 | 96245  | 96509  | 0.97 | 1.93E-01 | transcription_start_site | + | 97362  | 97362  | -985  | 9674 AN1560 |
| 2955 CONTIG25 | 96245  | 96509  | 0.97 | 1.93E-01 | transcription_start_site | + | 97719  | 97719  | -1342 | 9675 AN1560 |
| 2955 CONTIG25 | 96245  | 96509  | 0.97 | 1.93E-01 | transcription_start_site | + | 98226  | 98226  | -1849 | 9676 AN1560 |
| 2506 CONTIG25 | 101345 | 101619 | 1.2  | 8.01E-02 | transcription_start_site | + | 101450 | 101450 | 32    | 9678 AN1561 |
| 2506 CONTIG25 | 101345 | 101619 | 1.2  | 8.01E-02 | transcription_start_site | + | 101159 | 101159 | 323   | 9677 AN1561 |
| 2955 CONTIG25 | 96245  | 96509  | 0.97 | 1.93E-01 | transcription_start_site | + | 101159 | 101159 | -4782 | 9677 AN1561 |
| 2955 CONTIG25 | 96245  | 96509  | 0.97 | 1.93E-01 | transcription_start_site | + | 101450 | 101450 | -5073 | 9678 AN1561 |
| 2827 CONTIG25 | 106744 | 107153 | 1.05 | 1.44E-01 | transcription_start_site | - | 104568 | 104568 | -2380 | 9679 AN1562 |
| 2827 CONTIG25 | 106744 | 107153 | 1.05 | 1.44E-01 | transcription_start_site | + | 109276 | 109276 | -2327 | 9680 AN1563 |
| 2827 CONTIG25 | 106744 | 107153 | 1.05 | 1.44E-01 | transcription_start_site | + | 109498 | 109498 | -2549 | 9681 AN1563 |
| 2827 CONTIG25 | 106744 | 107153 | 1.05 | 1.44E-01 | transcription_start_site | + | 109637 | 109637 | -2688 | 9682 AN1563 |
| 2827 CONTIG25 | 106744 | 107153 | 1.05 | 1.44E-01 | transcription_start_site | + | 109990 | 109990 | -3041 | 9683 AN1563 |
| 2601 CONTIG25 | 137779 | 139263 | 1.16 | 7.51E-02 | transcription_start_site | + | 137283 | 137283 | 1238  | 9706 AN1572 |
| 2828 CONTIG25 | 137043 | 137393 | 1.05 | 1.44E-01 | transcription_start_site | + | 137283 | 137283 | -65   | 9706 AN1572 |
| 2828 CONTIG25 | 137043 | 137393 | 1.05 | 1.44E-01 | transcription_start_site | + | 136382 | 136382 | 836   | 9705 AN1572 |
| 2601 CONTIG25 | 137779 | 139263 | 1.16 | 7.51E-02 | transcription_start_site | - | 138995 | 138995 | 474   | 9709 AN1573 |
| 2601 CONTIG25 | 137779 | 139263 | 1.16 | 7.51E-02 | transcription_start_site | - | 139382 | 139382 | 861   | 9708 AN1573 |
| 2601 CONTIG25 | 137779 | 139263 | 1.16 | 7.51E-02 | transcription_start_site | - | 139632 | 139632 | 1111  | 9707 AN1573 |
| 2895 CONTIG25 | 141694 | 142119 | 1.01 | 1.66E-01 | transcription_start_site | - | 139632 | 139632 | -2274 | 9707 AN1573 |
| 2895 CONTIG25 | 141694 | 142119 | 1.01 | 1.66E-01 | transcription_start_site | - | 139382 | 139382 | -2524 | 9708 AN1573 |
| 2895 CONTIG25 | 141694 | 142119 | 1.01 | 1.66E-01 | transcription_start_site | - | 138995 | 138995 | -2911 | 9709 AN1573 |
| 2956 CONTIG25 | 140419 | 141435 | 0.97 | 1.99E-01 | transcription_start_site | - | 139632 | 139632 | -1295 | 9707 AN1573 |

|      |          |        |        |      |          |                          |   |        |        |       |      |        |
|------|----------|--------|--------|------|----------|--------------------------|---|--------|--------|-------|------|--------|
| 2956 | CONTIG25 | 140419 | 141435 | 0.97 | 1.99E-01 | transcription_start_site | - | 139382 | 139382 | -1545 | 9708 | AN1573 |
| 2956 | CONTIG25 | 140419 | 141435 | 0.97 | 1.99E-01 | transcription_start_site | - | 138995 | 138995 | -1932 | 9709 | AN1573 |
| 2895 | CONTIG25 | 141694 | 142119 | 1.01 | 1.66E-01 | transcription_start_site | - | 141850 | 141850 | -56   | 9710 | AN1574 |
| 2895 | CONTIG25 | 141694 | 142119 | 1.01 | 1.66E-01 | transcription_start_site | - | 141375 | 141375 | -531  | 9711 | AN1574 |
| 2956 | CONTIG25 | 140419 | 141435 | 0.97 | 1.99E-01 | transcription_start_site | - | 141375 | 141375 | 448   | 9711 | AN1574 |
| 2956 | CONTIG25 | 140419 | 141435 | 0.97 | 1.99E-01 | transcription_start_site | - | 141850 | 141850 | 923   | 9710 | AN1574 |
| 2895 | CONTIG25 | 141694 | 142119 | 1.01 | 1.66E-01 | transcription_start_site | - | 143092 | 143092 | 1185  | 9721 | AN1575 |
| 398  | CONTIG25 | 159984 | 160403 | 2.6  | 0.00E+00 | transcription_start_site | - | 160034 | 160034 | -159  | 9732 | AN1578 |
| 398  | CONTIG25 | 159984 | 160403 | 2.6  | 0.00E+00 | transcription_start_site | - | 159821 | 159821 | -372  | 9733 | AN1578 |
| 398  | CONTIG25 | 159984 | 160403 | 2.6  | 0.00E+00 | transcription_start_site | + | 162086 | 162086 | -1892 | 9734 | AN1579 |
| 398  | CONTIG25 | 159984 | 160403 | 2.6  | 0.00E+00 | transcription_start_site | + | 162343 | 162343 | -2149 | 9735 | AN1579 |
| 398  | CONTIG25 | 159984 | 160403 | 2.6  | 0.00E+00 | transcription_start_site | + | 162603 | 162603 | -2409 | 9736 | AN1579 |
| 398  | CONTIG25 | 159984 | 160403 | 2.6  | 0.00E+00 | transcription_start_site | + | 162817 | 162817 | -2623 | 9737 | AN1579 |
| 398  | CONTIG25 | 159984 | 160403 | 2.6  | 0.00E+00 | transcription_start_site | + | 163057 | 163057 | -2863 | 9738 | AN1579 |
| 398  | CONTIG25 | 159984 | 160403 | 2.6  | 0.00E+00 | transcription_start_site | + | 163245 | 163245 | -3051 | 9739 | AN1579 |
| 1230 | CONTIG25 | 188026 | 188320 | 1.74 | 7.85E-03 | transcription_start_site | - | 187620 | 187620 | -553  | 9755 | AN1587 |
| 1230 | CONTIG25 | 188026 | 188320 | 1.74 | 7.85E-03 | transcription_start_site | - | 186552 | 186552 | -1621 | 9756 | AN1587 |
| 1230 | CONTIG25 | 188026 | 188320 | 1.74 | 7.85E-03 | transcription_start_site | + | 188056 | 188056 | 117   | 9757 | AN1588 |
| 1230 | CONTIG25 | 188026 | 188320 | 1.74 | 7.85E-03 | transcription_start_site | + | 188644 | 188644 | -471  | 9758 | AN1588 |
| 1230 | CONTIG25 | 188026 | 188320 | 1.74 | 7.85E-03 | transcription_start_site | + | 189065 | 189065 | -892  | 9759 | AN1588 |
| 1230 | CONTIG25 | 188026 | 188320 | 1.74 | 7.85E-03 | transcription_start_site | + | 189166 | 189166 | -993  | 9760 | AN1588 |
| 1230 | CONTIG25 | 188026 | 188320 | 1.74 | 7.85E-03 | transcription_start_site | + | 189282 | 189282 | -1109 | 9761 | AN1588 |
| 1230 | CONTIG25 | 188026 | 188320 | 1.74 | 7.85E-03 | transcription_start_site | + | 189650 | 189650 | -1477 | 9762 | AN1588 |
| 1230 | CONTIG25 | 188026 | 188320 | 1.74 | 7.85E-03 | transcription_start_site | + | 189797 | 189797 | -1624 | 9763 | AN1588 |
| 1230 | CONTIG25 | 188026 | 188320 | 1.74 | 7.85E-03 | transcription_start_site | + | 189945 | 189945 | -1772 | 9764 | AN1588 |
| 1230 | CONTIG25 | 188026 | 188320 | 1.74 | 7.85E-03 | transcription_start_site | + | 190211 | 190211 | -2038 | 9765 | AN1588 |
| 1230 | CONTIG25 | 188026 | 188320 | 1.74 | 7.85E-03 | transcription_start_site | + | 190442 | 190442 | -2269 | 9766 | AN1588 |
| 2896 | CONTIG25 | 212861 | 213125 | 1.01 | 1.66E-01 | transcription_start_site | - | 210413 | 210413 | -2580 | 9784 | AN1594 |
| 2896 | CONTIG25 | 212861 | 213125 | 1.01 | 1.66E-01 | transcription_start_site | - | 209387 | 209387 | -3606 | 9785 | AN1594 |
| 2896 | CONTIG25 | 212861 | 213125 | 1.01 | 1.66E-01 | transcription_start_site | - | 209046 | 209046 | -3947 | 9786 | AN1594 |
| 2368 | CONTIG25 | 217051 | 217335 | 1.24 | 6.84E-02 | transcription_start_site | - | 213476 | 213476 | -3717 | 9791 | AN1596 |
| 2368 | CONTIG25 | 217051 | 217335 | 1.24 | 6.84E-02 | transcription_start_site | - | 213070 | 213070 | -4123 | 9792 | AN1596 |
| 2896 | CONTIG25 | 212861 | 213125 | 1.01 | 1.66E-01 | transcription_start_site | - | 213070 | 213070 | 77    | 9792 | AN1596 |
| 2896 | CONTIG25 | 212861 | 213125 | 1.01 | 1.66E-01 | transcription_start_site | - | 213476 | 213476 | 483   | 9791 | AN1596 |
| 2896 | CONTIG25 | 212861 | 213125 | 1.01 | 1.66E-01 | transcription_start_site | + | 213746 | 213746 | -753  | 9793 | AN1597 |
| 2896 | CONTIG25 | 212861 | 213125 | 1.01 | 1.66E-01 | transcription_start_site | + | 214093 | 214093 | -1100 | 9794 | AN1597 |
| 2896 | CONTIG25 | 212861 | 213125 | 1.01 | 1.66E-01 | transcription_start_site | + | 214696 | 214696 | -1703 | 9795 | AN1597 |
| 2368 | CONTIG25 | 217051 | 217335 | 1.24 | 6.84E-02 | transcription_start_site | + | 217597 | 217597 | -404  | 9798 | AN1598 |
| 2368 | CONTIG25 | 217051 | 217335 | 1.24 | 6.84E-02 | transcription_start_site | + | 216650 | 216650 | 543   | 9797 | AN1598 |
| 2368 | CONTIG25 | 217051 | 217335 | 1.24 | 6.84E-02 | transcription_start_site | + | 216349 | 216349 | 844   | 9796 | AN1598 |
| 2896 | CONTIG25 | 212861 | 213125 | 1.01 | 1.66E-01 | transcription_start_site | + | 216349 | 216349 | -3356 | 9796 | AN1598 |
| 2896 | CONTIG25 | 212861 | 213125 | 1.01 | 1.66E-01 | transcription_start_site | + | 216650 | 216650 | -3657 | 9797 | AN1598 |
| 2896 | CONTIG25 | 212861 | 213125 | 1.01 | 1.66E-01 | transcription_start_site | + | 217597 | 217597 | -4604 | 9798 | AN1598 |
| 2368 | CONTIG25 | 217051 | 217335 | 1.24 | 6.84E-02 | transcription_start_site | + | 218964 | 218964 | -1771 | 9799 | AN1599 |
| 2368 | CONTIG25 | 217051 | 217335 | 1.24 | 6.84E-02 | transcription_start_site | + | 219174 | 219174 | -1981 | 9800 | AN1599 |
| 2368 | CONTIG25 | 217051 | 217335 | 1.24 | 6.84E-02 | transcription_start_site | + | 219580 | 219580 | -2387 | 9801 | AN1599 |
| 2368 | CONTIG25 | 217051 | 217335 | 1.24 | 6.84E-02 | transcription_start_site | + | 220216 | 220216 | -3023 | 9802 | AN1599 |
| 2368 | CONTIG25 | 217051 | 217335 | 1.24 | 6.84E-02 | transcription_start_site | + | 220606 | 220606 | -3413 | 9803 | AN1599 |
| 124  | CONTIG26 | 6691   | 6955   | 3.13 | 0.00E+00 | transcription_start_site | - | 3799   | 3799   | -3024 | 9811 | AN1602 |
| 1461 | CONTIG26 | 3011   | 3585   | 1.61 | 3.99E-02 | transcription_start_site | - | 3799   | 3799   | 501   | 9811 | AN1602 |
| 1555 | CONTIG26 | 5706   | 6430   | 1.56 | 4.42E-02 | transcription_start_site | - | 3799   | 3799   | -2269 | 9811 | AN1602 |
| 2453 | CONTIG26 | 7596   | 8246   | 1.22 | 1.93E-01 | transcription_start_site | - | 3799   | 3799   | -4122 | 9811 | AN1602 |
| 124  | CONTIG26 | 6691   | 6955   | 3.13 | 0.00E+00 | transcription_start_site | + | 6344   | 6344   | 479   | 9813 | AN1603 |
| 124  | CONTIG26 | 6691   | 6955   | 3.13 | 0.00E+00 | transcription_start_site | + | 5965   | 5965   | 858   | 9812 | AN1603 |
| 1461 | CONTIG26 | 3011   | 3585   | 1.61 | 3.99E-02 | transcription_start_site | + | 5965   | 5965   | -2667 | 9812 | AN1603 |
| 1461 | CONTIG26 | 3011   | 3585   | 1.61 | 3.99E-02 | transcription_start_site | + | 6344   | 6344   | -3046 | 9813 | AN1603 |
| 1555 | CONTIG26 | 5706   | 6430   | 1.56 | 4.42E-02 | transcription_start_site | + | 5965   | 5965   | 103   | 9812 | AN1603 |

|               |       |       |      |          |                          |   |       |       |       |             |
|---------------|-------|-------|------|----------|--------------------------|---|-------|-------|-------|-------------|
| 1555 CONTIG26 | 5706  | 6430  | 1.56 | 4.42E-02 | transcription_start_site | + | 6344  | 6344  | -276  | 9813 AN1603 |
| 124 CONTIG26  | 6691  | 6955  | 3.13 | 0.00E+00 | transcription_start_site | + | 8263  | 8263  | -1440 | 9814 AN1604 |
| 124 CONTIG26  | 6691  | 6955  | 3.13 | 0.00E+00 | transcription_start_site | + | 8413  | 8413  | -1590 | 9815 AN1604 |
| 1461 CONTIG26 | 3011  | 3585  | 1.61 | 3.99E-02 | transcription_start_site | + | 8263  | 8263  | -4965 | 9814 AN1604 |
| 1461 CONTIG26 | 3011  | 3585  | 1.61 | 3.99E-02 | transcription_start_site | + | 8413  | 8413  | -5115 | 9815 AN1604 |
| 1555 CONTIG26 | 5706  | 6430  | 1.56 | 4.42E-02 | transcription_start_site | + | 8263  | 8263  | -2195 | 9814 AN1604 |
| 1555 CONTIG26 | 5706  | 6430  | 1.56 | 4.42E-02 | transcription_start_site | + | 8413  | 8413  | -2345 | 9815 AN1604 |
| 2453 CONTIG26 | 7596  | 8246  | 1.22 | 1.93E-01 | transcription_start_site | + | 8263  | 8263  | -342  | 9814 AN1604 |
| 2453 CONTIG26 | 7596  | 8246  | 1.22 | 1.93E-01 | transcription_start_site | + | 8413  | 8413  | -492  | 9815 AN1604 |
| 71 CONTIG26   | 9696  | 9950  | 3.32 | 0.00E+00 | transcription_start_site | + | 10567 | 10567 | -744  | 9816 AN1605 |
| 124 CONTIG26  | 6691  | 6955  | 3.13 | 0.00E+00 | transcription_start_site | + | 10567 | 10567 | -3744 | 9816 AN1605 |
| 1555 CONTIG26 | 5706  | 6430  | 1.56 | 4.42E-02 | transcription_start_site | + | 10567 | 10567 | -4499 | 9816 AN1605 |
| 2453 CONTIG26 | 7596  | 8246  | 1.22 | 1.93E-01 | transcription_start_site | + | 10567 | 10567 | -2646 | 9816 AN1605 |
| 1561 CONTIG26 | 13056 | 13325 | 1.56 | 6.84E-02 | transcription_start_site | - | 13388 | 13388 | 197   | 9817 AN1606 |
| 1356 CONTIG26 | 35268 | 35832 | 1.66 | 3.33E-02 | transcription_start_site | - | 33219 | 33219 | -2331 | 9838 AN1611 |
| 1356 CONTIG26 | 35268 | 35832 | 1.66 | 3.33E-02 | transcription_start_site | - | 36003 | 36003 | 453   | 9842 AN1612 |
| 1356 CONTIG26 | 35268 | 35832 | 1.66 | 3.33E-02 | transcription_start_site | - | 36410 | 36410 | 860   | 9841 AN1612 |
| 1356 CONTIG26 | 35268 | 35832 | 1.66 | 3.33E-02 | transcription_start_site | - | 36579 | 36579 | 1029  | 9840 AN1612 |
| 1356 CONTIG26 | 35268 | 35832 | 1.66 | 3.33E-02 | transcription_start_site | - | 36716 | 36716 | 1166  | 9839 AN1612 |
| 317 CONTIG26  | 41717 | 42881 | 2.74 | 9.51E-04 | transcription_start_site | - | 39177 | 39177 | -3122 | 9843 AN1613 |
| 317 CONTIG26  | 41717 | 42881 | 2.74 | 9.51E-04 | transcription_start_site | - | 38827 | 38827 | -3472 | 9844 AN1613 |
| 317 CONTIG26  | 41717 | 42881 | 2.74 | 9.51E-04 | transcription_start_site | - | 38598 | 38598 | -3701 | 9845 AN1613 |
| 317 CONTIG26  | 41717 | 42881 | 2.74 | 9.51E-04 | transcription_start_site | - | 38199 | 38199 | -4100 | 9846 AN1613 |
| 317 CONTIG26  | 41717 | 42881 | 2.74 | 9.51E-04 | transcription_start_site | - | 37947 | 37947 | -4352 | 9847 AN1613 |
| 317 CONTIG26  | 41717 | 42881 | 2.74 | 9.51E-04 | transcription_start_site | - | 41280 | 41280 | -1019 | 9848 AN1614 |
| 1454 CONTIG26 | 49963 | 50527 | 1.61 | 3.61E-02 | transcription_start_site | - | 47555 | 47555 | -2690 | 9849 AN1615 |
| 1454 CONTIG26 | 49963 | 50527 | 1.61 | 3.61E-02 | transcription_start_site | - | 46207 | 46207 | -4038 | 9850 AN1615 |
| 1454 CONTIG26 | 49963 | 50527 | 1.61 | 3.61E-02 | transcription_start_site | - | 46071 | 46071 | -4174 | 9851 AN1615 |
| 1454 CONTIG26 | 49963 | 50527 | 1.61 | 3.61E-02 | transcription_start_site | - | 45709 | 45709 | -4536 | 9852 AN1615 |
| 1454 CONTIG26 | 49963 | 50527 | 1.61 | 3.61E-02 | transcription_start_site | - | 45267 | 45267 | -4978 | 9853 AN1615 |
| 1454 CONTIG26 | 49963 | 50527 | 1.61 | 3.61E-02 | transcription_start_site | - | 44983 | 44983 | -5262 | 9854 AN1615 |
| 1454 CONTIG26 | 49963 | 50527 | 1.61 | 3.61E-02 | transcription_start_site | + | 50497 | 50497 | -252  | 9857 AN1616 |
| 1454 CONTIG26 | 49963 | 50527 | 1.61 | 3.61E-02 | transcription_start_site | + | 50699 | 50699 | -454  | 9858 AN1616 |
| 1454 CONTIG26 | 49963 | 50527 | 1.61 | 3.61E-02 | transcription_start_site | + | 50842 | 50842 | -597  | 9859 AN1616 |
| 1454 CONTIG26 | 49963 | 50527 | 1.61 | 3.61E-02 | transcription_start_site | + | 50988 | 50988 | -743  | 9860 AN1616 |
| 1454 CONTIG26 | 49963 | 50527 | 1.61 | 3.61E-02 | transcription_start_site | + | 52744 | 52744 | -2499 | 9861 AN1617 |
| 1454 CONTIG26 | 49963 | 50527 | 1.61 | 3.61E-02 | transcription_start_site | + | 53159 | 53159 | -2914 | 9862 AN1617 |
| 949 CONTIG26  | 73817 | 75441 | 1.96 | 9.21E-03 | transcription_start_site | - | 69123 | 69123 | -5506 | 9875 AN1623 |
| 52 CONTIG26   | 75909 | 76418 | 3.42 | 0.00E+00 | transcription_start_site | - | 75486 | 75486 | -677  | 9880 AN1624 |
| 755 CONTIG26  | 80029 | 80311 | 2.15 | 8.81E-03 | transcription_start_site | - | 75486 | 75486 | -4684 | 9880 AN1624 |
| 949 CONTIG26  | 73817 | 75441 | 1.96 | 9.21E-03 | transcription_start_site | - | 75486 | 75486 | 857   | 9880 AN1624 |
| 52 CONTIG26   | 75909 | 76418 | 3.42 | 0.00E+00 | transcription_start_site | + | 80324 | 80324 | -4160 | 9881 AN1625 |
| 52 CONTIG26   | 75909 | 76418 | 3.42 | 0.00E+00 | transcription_start_site | + | 80709 | 80709 | -4545 | 9882 AN1625 |
| 52 CONTIG26   | 75909 | 76418 | 3.42 | 0.00E+00 | transcription_start_site | + | 80947 | 80947 | -4783 | 9883 AN1625 |
| 755 CONTIG26  | 80029 | 80311 | 2.15 | 8.81E-03 | transcription_start_site | + | 80324 | 80324 | -154  | 9881 AN1625 |
| 755 CONTIG26  | 80029 | 80311 | 2.15 | 8.81E-03 | transcription_start_site | + | 80709 | 80709 | -539  | 9882 AN1625 |
| 755 CONTIG26  | 80029 | 80311 | 2.15 | 8.81E-03 | transcription_start_site | + | 80947 | 80947 | -777  | 9883 AN1625 |
| 755 CONTIG26  | 80029 | 80311 | 2.15 | 8.81E-03 | transcription_start_site | + | 81548 | 81548 | -1378 | 9884 AN1625 |
| 755 CONTIG26  | 80029 | 80311 | 2.15 | 8.81E-03 | transcription_start_site | + | 81827 | 81827 | -1657 | 9885 AN1625 |
| 949 CONTIG26  | 73817 | 75441 | 1.96 | 9.21E-03 | transcription_start_site | + | 80324 | 80324 | -5695 | 9881 AN1625 |
| 232 CONTIG26  | 94444 | 94853 | 2.88 | 6.10E-04 | transcription_start_site | - | 94223 | 94223 | -425  | 9892 AN1628 |
| 232 CONTIG26  | 94444 | 94853 | 2.88 | 6.10E-04 | transcription_start_site | - | 93896 | 93896 | -752  | 9893 AN1628 |
| 232 CONTIG26  | 94444 | 94853 | 2.88 | 6.10E-04 | transcription_start_site | - | 93580 | 93580 | -1068 | 9894 AN1628 |
| 2145 CONTIG26 | 95629 | 95978 | 1.32 | 1.44E-01 | transcription_start_site | - | 94223 | 94223 | -1580 | 9892 AN1628 |
| 2145 CONTIG26 | 95629 | 95978 | 1.32 | 1.44E-01 | transcription_start_site | - | 93896 | 93896 | -1907 | 9893 AN1628 |
| 2145 CONTIG26 | 95629 | 95978 | 1.32 | 1.44E-01 | transcription_start_site | - | 93580 | 93580 | -2223 | 9894 AN1628 |
| 232 CONTIG26  | 94444 | 94853 | 2.88 | 6.10E-04 | transcription_start_site | - | 95733 | 95733 | 1084  | 9899 AN1629 |

|      |          |        |        |      |          |                          |   |        |        |       |       |        |
|------|----------|--------|--------|------|----------|--------------------------|---|--------|--------|-------|-------|--------|
| 806  | CONTIG26 | 99535  | 100044 | 2.1  | 1.11E-02 | transcription_start_site | - | 97350  | 97350  | -2439 | 9895  | AN1629 |
| 806  | CONTIG26 | 99535  | 100044 | 2.1  | 1.11E-02 | transcription_start_site | - | 97174  | 97174  | -2615 | 9896  | AN1629 |
| 806  | CONTIG26 | 99535  | 100044 | 2.1  | 1.11E-02 | transcription_start_site | - | 97094  | 97094  | -2695 | 9897  | AN1629 |
| 806  | CONTIG26 | 99535  | 100044 | 2.1  | 1.11E-02 | transcription_start_site | - | 96923  | 96923  | -2866 | 9898  | AN1629 |
| 806  | CONTIG26 | 99535  | 100044 | 2.1  | 1.11E-02 | transcription_start_site | - | 95733  | 95733  | -4056 | 9899  | AN1629 |
| 2145 | CONTIG26 | 95629  | 95978  | 1.32 | 1.44E-01 | transcription_start_site | - | 95733  | 95733  | -70   | 9899  | AN1629 |
| 2145 | CONTIG26 | 95629  | 95978  | 1.32 | 1.44E-01 | transcription_start_site | - | 96923  | 96923  | 1119  | 9898  | AN1629 |
| 2011 | CONTIG26 | 106280 | 106799 | 1.37 | 1.07E-01 | transcription_start_site | - | 105852 | 105852 | -687  | 9900  | AN1631 |
| 2011 | CONTIG26 | 106280 | 106799 | 1.37 | 1.07E-01 | transcription_start_site | - | 105700 | 105700 | -839  | 9901  | AN1631 |
| 2011 | CONTIG26 | 106280 | 106799 | 1.37 | 1.07E-01 | transcription_start_site | - | 105415 | 105415 | -1124 | 9902  | AN1631 |
| 2011 | CONTIG26 | 106280 | 106799 | 1.37 | 1.07E-01 | transcription_start_site | - | 104916 | 104916 | -1623 | 9903  | AN1631 |
| 2011 | CONTIG26 | 106280 | 106799 | 1.37 | 1.07E-01 | transcription_start_site | - | 104436 | 104436 | -2103 | 9904  | AN1631 |
| 2011 | CONTIG26 | 106280 | 106799 | 1.37 | 1.07E-01 | transcription_start_site | - | 106963 | 106963 | 423   | 9907  | AN1632 |
| 1653 | CONTIG26 | 118962 | 119226 | 1.52 | 8.01E-02 | transcription_start_site | - | 115717 | 115717 | -3377 | 9910  | AN1634 |
| 1653 | CONTIG26 | 118962 | 119226 | 1.52 | 8.01E-02 | transcription_start_site | - | 115357 | 115357 | -3737 | 9911  | AN1634 |
| 1130 | CONTIG26 | 122642 | 122998 | 1.81 | 3.08E-02 | transcription_start_site | - | 118634 | 118634 | -4186 | 9913  | AN1635 |
| 1130 | CONTIG26 | 122642 | 122998 | 1.81 | 3.08E-02 | transcription_start_site | - | 118510 | 118510 | -4310 | 9914  | AN1635 |
| 1130 | CONTIG26 | 122642 | 122998 | 1.81 | 3.08E-02 | transcription_start_site | - | 118227 | 118227 | -4593 | 9915  | AN1635 |
| 1653 | CONTIG26 | 118962 | 119226 | 1.52 | 8.01E-02 | transcription_start_site | - | 118634 | 118634 | -460  | 9913  | AN1635 |
| 1653 | CONTIG26 | 118962 | 119226 | 1.52 | 8.01E-02 | transcription_start_site | - | 118510 | 118510 | -584  | 9914  | AN1635 |
| 1653 | CONTIG26 | 118962 | 119226 | 1.52 | 8.01E-02 | transcription_start_site | - | 118227 | 118227 | -867  | 9915  | AN1635 |
| 1653 | CONTIG26 | 118962 | 119226 | 1.52 | 8.01E-02 | transcription_start_site | - | 117640 | 117640 | -1454 | 9916  | AN1635 |
| 1653 | CONTIG26 | 118962 | 119226 | 1.52 | 8.01E-02 | transcription_start_site | + | 119007 | 119007 | 87    | 9917  | AN1636 |
| 1653 | CONTIG26 | 118962 | 119226 | 1.52 | 8.01E-02 | transcription_start_site | + | 119654 | 119654 | -560  | 9918  | AN1636 |
| 1130 | CONTIG26 | 122642 | 122998 | 1.81 | 3.08E-02 | transcription_start_site | - | 122633 | 122633 | -187  | 9919  | AN1637 |
| 1130 | CONTIG26 | 122642 | 122998 | 1.81 | 3.08E-02 | transcription_start_site | - | 122476 | 122476 | -344  | 9920  | AN1637 |
| 1130 | CONTIG26 | 122642 | 122998 | 1.81 | 3.08E-02 | transcription_start_site | - | 123401 | 123401 | 581   | 9923  | AN1638 |
| 1130 | CONTIG26 | 122642 | 122998 | 1.81 | 3.08E-02 | transcription_start_site | + | 126949 | 126949 | -4129 | 9924  | AN1639 |
| 1130 | CONTIG26 | 122642 | 122998 | 1.81 | 3.08E-02 | transcription_start_site | + | 127142 | 127142 | -4322 | 9925  | AN1639 |
| 1130 | CONTIG26 | 122642 | 122998 | 1.81 | 3.08E-02 | transcription_start_site | + | 127348 | 127348 | -4528 | 9926  | AN1639 |
| 546  | CONTIG26 | 173641 | 174126 | 2.39 | 3.61E-03 | transcription_start_site | - | 169131 | 169131 | -4752 | 9977  | AN1651 |
| 546  | CONTIG26 | 173641 | 174126 | 2.39 | 3.61E-03 | transcription_start_site | - | 168876 | 168876 | -5007 | 9978  | AN1651 |
| 547  | CONTIG26 | 181506 | 182014 | 2.39 | 3.61E-03 | transcription_start_site | + | 182997 | 182997 | -1237 | 9982  | AN1652 |
| 547  | CONTIG26 | 181506 | 182014 | 2.39 | 3.61E-03 | transcription_start_site | + | 183623 | 183623 | -1863 | 9983  | AN1652 |
| 547  | CONTIG26 | 181506 | 182014 | 2.39 | 3.61E-03 | transcription_start_site | + | 185838 | 185838 | -4078 | 9984  | AN1653 |
| 807  | CONTIG26 | 186543 | 186817 | 2.1  | 1.11E-02 | transcription_start_site | + | 185838 | 185838 | 842   | 9984  | AN1653 |
| 807  | CONTIG26 | 186543 | 186817 | 2.1  | 1.11E-02 | transcription_start_site | + | 188673 | 188673 | -1993 | 9985  | AN1653 |
| 807  | CONTIG26 | 186543 | 186817 | 2.1  | 1.11E-02 | transcription_start_site | + | 188822 | 188822 | -2142 | 9986  | AN1653 |
| 807  | CONTIG26 | 186543 | 186817 | 2.1  | 1.11E-02 | transcription_start_site | + | 188926 | 188926 | -2246 | 9987  | AN1653 |
| 807  | CONTIG26 | 186543 | 186817 | 2.1  | 1.11E-02 | transcription_start_site | + | 189615 | 189615 | -2935 | 9988  | AN1653 |
| 1888 | CONTIG26 | 193519 | 193868 | 1.42 | 1.08E-01 | transcription_start_site | + | 192522 | 192522 | 1171  | 9990  | AN1654 |
| 72   | CONTIG26 | 211819 | 212083 | 3.32 | 0.00E+00 | transcription_start_site | - | 211203 | 211203 | -748  | 9992  | AN1658 |
| 606  | CONTIG26 | 214289 | 214858 | 2.3  | 2.32E-03 | transcription_start_site | - | 211203 | 211203 | -3370 | 9992  | AN1658 |
| 1782 | CONTIG26 | 213229 | 213520 | 1.47 | 9.24E-02 | transcription_start_site | - | 211203 | 211203 | -2171 | 9992  | AN1658 |
| 72   | CONTIG26 | 211819 | 212083 | 3.32 | 0.00E+00 | transcription_start_site | + | 212808 | 212808 | -857  | 9993  | AN1659 |
| 72   | CONTIG26 | 211819 | 212083 | 3.32 | 0.00E+00 | transcription_start_site | + | 212873 | 212873 | -922  | 9994  | AN1659 |
| 72   | CONTIG26 | 211819 | 212083 | 3.32 | 0.00E+00 | transcription_start_site | + | 213500 | 213500 | -1549 | 9995  | AN1659 |
| 72   | CONTIG26 | 211819 | 212083 | 3.32 | 0.00E+00 | transcription_start_site | + | 214105 | 214105 | -2154 | 9996  | AN1659 |
| 606  | CONTIG26 | 214289 | 214858 | 2.3  | 2.32E-03 | transcription_start_site | + | 214105 | 214105 | 468   | 9996  | AN1659 |
| 606  | CONTIG26 | 214289 | 214858 | 2.3  | 2.32E-03 | transcription_start_site | + | 213500 | 213500 | 1073  | 9995  | AN1659 |
| 1782 | CONTIG26 | 213229 | 213520 | 1.47 | 9.24E-02 | transcription_start_site | + | 213500 | 213500 | -125  | 9995  | AN1659 |
| 1782 | CONTIG26 | 213229 | 213520 | 1.47 | 9.24E-02 | transcription_start_site | + | 212873 | 212873 | 501   | 9994  | AN1659 |
| 1782 | CONTIG26 | 213229 | 213520 | 1.47 | 9.24E-02 | transcription_start_site | + | 212808 | 212808 | 566   | 9993  | AN1659 |
| 1782 | CONTIG26 | 213229 | 213520 | 1.47 | 9.24E-02 | transcription_start_site | + | 214105 | 214105 | -730  | 9996  | AN1659 |
| 435  | CONTIG26 | 263417 | 263928 | 2.54 | 1.80E-03 | transcription_start_site | - | 260467 | 260467 | -3205 | 10045 | AN1674 |
| 435  | CONTIG26 | 263417 | 263928 | 2.54 | 1.80E-03 | transcription_start_site | - | 263025 | 263025 | -647  | 10047 | AN1675 |
| 435  | CONTIG26 | 263417 | 263928 | 2.54 | 1.80E-03 | transcription_start_site | - | 262920 | 262920 | -752  | 10048 | AN1675 |



|      |          |        |        |      |          |                          |   |        |        |       |       |        |
|------|----------|--------|--------|------|----------|--------------------------|---|--------|--------|-------|-------|--------|
| 435  | CONTIG26 | 263417 | 263928 | 2.54 | 1.80E-03 | transcription_start_site | - | 262225 | 262225 | -1447 | 10049 | AN1675 |
| 951  | CONTIG26 | 267987 | 268411 | 1.96 | 1.84E-02 | transcription_start_site | - | 263025 | 263025 | -5174 | 10047 | AN1675 |
| 435  | CONTIG26 | 263417 | 263928 | 2.54 | 1.80E-03 | transcription_start_site | - | 264481 | 264481 | 808   | 10051 | AN1676 |
| 951  | CONTIG26 | 267987 | 268411 | 1.96 | 1.84E-02 | transcription_start_site | - | 264983 | 264983 | -3216 | 10050 | AN1676 |
| 951  | CONTIG26 | 267987 | 268411 | 1.96 | 1.84E-02 | transcription_start_site | - | 264481 | 264481 | -3718 | 10051 | AN1676 |
| 1005 | CONTIG26 | 269702 | 271192 | 1.91 | 2.12E-02 | transcription_start_site | - | 264983 | 264983 | -5464 | 10050 | AN1676 |
| 2454 | CONTIG26 | 268667 | 269301 | 1.22 | 1.93E-01 | transcription_start_site | - | 264983 | 264983 | -4001 | 10050 | AN1676 |
| 2454 | CONTIG26 | 268667 | 269301 | 1.22 | 1.93E-01 | transcription_start_site | - | 264481 | 264481 | -4503 | 10051 | AN1676 |
| 951  | CONTIG26 | 267987 | 268411 | 1.96 | 1.84E-02 | transcription_start_site | + | 269175 | 269175 | -976  | 10052 | AN1677 |
| 951  | CONTIG26 | 267987 | 268411 | 1.96 | 1.84E-02 | transcription_start_site | + | 269444 | 269444 | -1245 | 10053 | AN1677 |
| 951  | CONTIG26 | 267987 | 268411 | 1.96 | 1.84E-02 | transcription_start_site | + | 269896 | 269896 | -1697 | 10054 | AN1677 |
| 1005 | CONTIG26 | 269702 | 271192 | 1.91 | 2.12E-02 | transcription_start_site | + | 269896 | 269896 | 551   | 10054 | AN1677 |
| 1005 | CONTIG26 | 269702 | 271192 | 1.91 | 2.12E-02 | transcription_start_site | + | 269444 | 269444 | 1003  | 10053 | AN1677 |
| 1005 | CONTIG26 | 269702 | 271192 | 1.91 | 2.12E-02 | transcription_start_site | + | 269175 | 269175 | 1272  | 10052 | AN1677 |
| 2454 | CONTIG26 | 268667 | 269301 | 1.22 | 1.93E-01 | transcription_start_site | + | 269175 | 269175 | -191  | 10052 | AN1677 |
| 2454 | CONTIG26 | 268667 | 269301 | 1.22 | 1.93E-01 | transcription_start_site | + | 269444 | 269444 | -460  | 10053 | AN1677 |
| 2454 | CONTIG26 | 268667 | 269301 | 1.22 | 1.93E-01 | transcription_start_site | + | 269896 | 269896 | -912  | 10054 | AN1677 |
| 951  | CONTIG26 | 267987 | 268411 | 1.96 | 1.84E-02 | transcription_start_site | + | 273254 | 273254 | -5055 | 10055 | AN1678 |
| 1005 | CONTIG26 | 269702 | 271192 | 1.91 | 2.12E-02 | transcription_start_site | + | 273254 | 273254 | -2807 | 10055 | AN1678 |
| 1005 | CONTIG26 | 269702 | 271192 | 1.91 | 2.12E-02 | transcription_start_site | + | 275515 | 275515 | -5068 | 10056 | AN1678 |
| 2454 | CONTIG26 | 268667 | 269301 | 1.22 | 1.93E-01 | transcription_start_site | + | 273254 | 273254 | -4270 | 10055 | AN1678 |
| 1005 | CONTIG26 | 269702 | 271192 | 1.91 | 2.12E-02 | transcription_start_site | + | 275926 | 275926 | -5479 | 10057 | AN1679 |
| 1889 | CONTIG26 | 284478 | 284912 | 1.42 | 1.08E-01 | transcription_start_site | - | 284543 | 284543 | -152  | 10068 | AN1682 |
| 1889 | CONTIG26 | 284478 | 284912 | 1.42 | 1.08E-01 | transcription_start_site | - | 284887 | 284887 | 192   | 10067 | AN1682 |
| 2012 | CONTIG26 | 287188 | 288517 | 1.37 | 1.07E-01 | transcription_start_site | - | 284887 | 284887 | -2965 | 10067 | AN1682 |
| 2012 | CONTIG26 | 287188 | 288517 | 1.37 | 1.07E-01 | transcription_start_site | - | 284543 | 284543 | -3309 | 10068 | AN1682 |
| 2301 | CONTIG26 | 286218 | 286567 | 1.27 | 1.66E-01 | transcription_start_site | - | 284887 | 284887 | -1505 | 10067 | AN1682 |
| 2301 | CONTIG26 | 286218 | 286567 | 1.27 | 1.66E-01 | transcription_start_site | - | 284543 | 284543 | -1849 | 10068 | AN1682 |
| 1889 | CONTIG26 | 284478 | 284912 | 1.42 | 1.08E-01 | transcription_start_site | - | 285430 | 285430 | 735   | 10072 | AN1683 |
| 1889 | CONTIG26 | 284478 | 284912 | 1.42 | 1.08E-01 | transcription_start_site | - | 285776 | 285776 | 1081  | 10071 | AN1683 |
| 2012 | CONTIG26 | 287188 | 288517 | 1.37 | 1.07E-01 | transcription_start_site | - | 286249 | 286249 | -1603 | 10069 | AN1683 |
| 2012 | CONTIG26 | 287188 | 288517 | 1.37 | 1.07E-01 | transcription_start_site | - | 286024 | 286024 | -1828 | 10070 | AN1683 |
| 2012 | CONTIG26 | 287188 | 288517 | 1.37 | 1.07E-01 | transcription_start_site | - | 285776 | 285776 | -2076 | 10071 | AN1683 |
| 2012 | CONTIG26 | 287188 | 288517 | 1.37 | 1.07E-01 | transcription_start_site | - | 285430 | 285430 | -2422 | 10072 | AN1683 |
| 2301 | CONTIG26 | 286218 | 286567 | 1.27 | 1.66E-01 | transcription_start_site | - | 286249 | 286249 | -143  | 10069 | AN1683 |
| 2301 | CONTIG26 | 286218 | 286567 | 1.27 | 1.66E-01 | transcription_start_site | - | 286024 | 286024 | -368  | 10070 | AN1683 |
| 2301 | CONTIG26 | 286218 | 286567 | 1.27 | 1.66E-01 | transcription_start_site | - | 285776 | 285776 | -616  | 10071 | AN1683 |
| 2301 | CONTIG26 | 286218 | 286567 | 1.27 | 1.66E-01 | transcription_start_site | - | 285430 | 285430 | -962  | 10072 | AN1683 |
| 1889 | CONTIG26 | 284478 | 284912 | 1.42 | 1.08E-01 | transcription_start_site | + | 287089 | 287089 | -2394 | 10073 | AN1684 |
| 1889 | CONTIG26 | 284478 | 284912 | 1.42 | 1.08E-01 | transcription_start_site | + | 287278 | 287278 | -2583 | 10074 | AN1684 |
| 2012 | CONTIG26 | 287188 | 288517 | 1.37 | 1.07E-01 | transcription_start_site | + | 287278 | 287278 | 574   | 10074 | AN1684 |
| 2012 | CONTIG26 | 287188 | 288517 | 1.37 | 1.07E-01 | transcription_start_site | + | 287089 | 287089 | 763   | 10073 | AN1684 |
| 2301 | CONTIG26 | 286218 | 286567 | 1.27 | 1.66E-01 | transcription_start_site | + | 287089 | 287089 | -696  | 10073 | AN1684 |
| 2301 | CONTIG26 | 286218 | 286567 | 1.27 | 1.66E-01 | transcription_start_site | + | 287278 | 287278 | -885  | 10074 | AN1684 |
| 2302 | CONTIG26 | 296718 | 297062 | 1.27 | 1.66E-01 | transcription_start_site | - | 294837 | 294837 | -2053 | 10075 | AN1685 |
| 2302 | CONTIG26 | 296718 | 297062 | 1.27 | 1.66E-01 | transcription_start_site | - | 294736 | 294736 | -2154 | 10076 | AN1685 |
| 2302 | CONTIG26 | 296718 | 297062 | 1.27 | 1.66E-01 | transcription_start_site | - | 297342 | 297342 | 452   | 10080 | AN1686 |
| 2302 | CONTIG26 | 296718 | 297062 | 1.27 | 1.66E-01 | transcription_start_site | - | 297924 | 297924 | 1034  | 10079 | AN1686 |
| 2302 | CONTIG26 | 296718 | 297062 | 1.27 | 1.66E-01 | transcription_start_site | + | 300308 | 300308 | -3418 | 10081 | AN1687 |
| 2302 | CONTIG26 | 296718 | 297062 | 1.27 | 1.66E-01 | transcription_start_site | + | 300488 | 300488 | -3598 | 10082 | AN1687 |
| 2302 | CONTIG26 | 296718 | 297062 | 1.27 | 1.66E-01 | transcription_start_site | + | 300635 | 300635 | -3745 | 10083 | AN1687 |
| 2302 | CONTIG26 | 296718 | 297062 | 1.27 | 1.66E-01 | transcription_start_site | + | 301084 | 301084 | -4194 | 10084 | AN1687 |
| 2302 | CONTIG26 | 296718 | 297062 | 1.27 | 1.66E-01 | transcription_start_site | + | 301389 | 301389 | -4499 | 10085 | AN1687 |
| 1562 | CONTIG26 | 304596 | 304937 | 1.56 | 6.84E-02 | transcription_start_site | - | 304864 | 304864 | 97    | 10087 | AN1688 |
| 1562 | CONTIG26 | 304596 | 304937 | 1.56 | 6.84E-02 | transcription_start_site | - | 304947 | 304947 | 180   | 10086 | AN1688 |
| 1562 | CONTIG26 | 304596 | 304937 | 1.56 | 6.84E-02 | transcription_start_site | - | 304335 | 304335 | -431  | 10088 | AN1688 |
| 1562 | CONTIG26 | 304596 | 304937 | 1.56 | 6.84E-02 | transcription_start_site | - | 303974 | 303974 | -792  | 10089 | AN1688 |

|      |          |        |        |      |          |                          |   |        |        |       |       |        |
|------|----------|--------|--------|------|----------|--------------------------|---|--------|--------|-------|-------|--------|
| 1562 | CONTIG26 | 304596 | 304937 | 1.56 | 6.84E-02 | transcription_start_site | - | 303715 | 303715 | -1051 | 10090 | AN1688 |
| 1562 | CONTIG26 | 304596 | 304937 | 1.56 | 6.84E-02 | transcription_start_site | - | 303543 | 303543 | -1223 | 10091 | AN1688 |
| 1562 | CONTIG26 | 304596 | 304937 | 1.56 | 6.84E-02 | transcription_start_site | - | 303344 | 303344 | -1422 | 10092 | AN1688 |
| 1563 | CONTIG26 | 332117 | 332606 | 1.56 | 6.84E-02 | transcription_start_site | - | 330463 | 330463 | -1898 | 10116 | AN1696 |
| 1563 | CONTIG26 | 332117 | 332606 | 1.56 | 6.84E-02 | transcription_start_site | + | 331757 | 331757 | 604   | 10117 | AN1697 |
| 1563 | CONTIG26 | 332117 | 332606 | 1.56 | 6.84E-02 | transcription_start_site | + | 333496 | 333496 | -1134 | 10118 | AN1697 |
| 1563 | CONTIG26 | 332117 | 332606 | 1.56 | 6.84E-02 | transcription_start_site | + | 334009 | 334009 | -1647 | 10119 | AN1697 |
| 2144 | CONTIG26 | 356265 | 356609 | 1.32 | 1.28E-01 | transcription_start_site | - | 353154 | 353154 | -3283 | 10147 | AN1704 |
| 2144 | CONTIG26 | 356265 | 356609 | 1.32 | 1.28E-01 | transcription_start_site | - | 353044 | 353044 | -3393 | 10148 | AN1704 |
| 2144 | CONTIG26 | 356265 | 356609 | 1.32 | 1.28E-01 | transcription_start_site | - | 355739 | 355739 | -698  | 10149 | AN1705 |
| 2144 | CONTIG26 | 356265 | 356609 | 1.32 | 1.28E-01 | transcription_start_site | - | 354358 | 354358 | -2079 | 10150 | AN1705 |
| 2144 | CONTIG26 | 356265 | 356609 | 1.32 | 1.28E-01 | transcription_start_site | - | 354134 | 354134 | -2303 | 10151 | AN1705 |
| 2144 | CONTIG26 | 356265 | 356609 | 1.32 | 1.28E-01 | transcription_start_site | - | 353921 | 353921 | -2516 | 10152 | AN1705 |
| 2144 | CONTIG26 | 356265 | 356609 | 1.32 | 1.28E-01 | transcription_start_site | + | 360685 | 360685 | -4248 | 10156 | AN1707 |
| 2144 | CONTIG26 | 356265 | 356609 | 1.32 | 1.28E-01 | transcription_start_site | + | 360890 | 360890 | -4453 | 10157 | AN1707 |
| 2144 | CONTIG26 | 356265 | 356609 | 1.32 | 1.28E-01 | transcription_start_site | + | 361315 | 361315 | -4878 | 10158 | AN1707 |
| 1006 | CONTIG26 | 375380 | 375672 | 1.91 | 2.12E-02 | transcription_start_site | + | 375762 | 375762 | -236  | 10173 | AN1713 |
| 1006 | CONTIG26 | 375380 | 375672 | 1.91 | 2.12E-02 | transcription_start_site | + | 376116 | 376116 | -590  | 10174 | AN1713 |
| 1006 | CONTIG26 | 375380 | 375672 | 1.91 | 2.12E-02 | transcription_start_site | + | 377009 | 377009 | -1483 | 10175 | AN1713 |
| 1006 | CONTIG26 | 375380 | 375672 | 1.91 | 2.12E-02 | transcription_start_site | + | 378323 | 378323 | -2797 | 10176 | AN1713 |
| 1006 | CONTIG26 | 375380 | 375672 | 1.91 | 2.12E-02 | transcription_start_site | + | 379228 | 379228 | -3702 | 10177 | AN1714 |
| 1006 | CONTIG26 | 375380 | 375672 | 1.91 | 2.12E-02 | transcription_start_site | + | 380366 | 380366 | -4840 | 10178 | AN1715 |
| 1006 | CONTIG26 | 375380 | 375672 | 1.91 | 2.12E-02 | transcription_start_site | + | 380464 | 380464 | -4938 | 10179 | AN1715 |
| 1006 | CONTIG26 | 375380 | 375672 | 1.91 | 2.12E-02 | transcription_start_site | + | 380620 | 380620 | -5094 | 10180 | AN1715 |
| 1416 | CONTIG27 | 33076  | 34487  | 1.62 | 7.16E-03 | transcription_start_site | - | 29543  | 29543  | -4238 | 10210 | AN1729 |
| 1416 | CONTIG27 | 33076  | 34487  | 1.62 | 7.16E-03 | transcription_start_site | - | 29381  | 29381  | -4400 | 10211 | AN1729 |
| 1416 | CONTIG27 | 33076  | 34487  | 1.62 | 7.16E-03 | transcription_start_site | - | 29177  | 29177  | -4604 | 10212 | AN1729 |
| 1416 | CONTIG27 | 33076  | 34487  | 1.62 | 7.16E-03 | transcription_start_site | - | 28839  | 28839  | -4942 | 10213 | AN1729 |
| 1416 | CONTIG27 | 33076  | 34487  | 1.62 | 7.16E-03 | transcription_start_site | - | 28697  | 28697  | -5084 | 10214 | AN1729 |
| 1416 | CONTIG27 | 33076  | 34487  | 1.62 | 7.16E-03 | transcription_start_site | - | 31479  | 31479  | -2302 | 10217 | AN1730 |
| 1416 | CONTIG27 | 33076  | 34487  | 1.62 | 7.16E-03 | transcription_start_site | - | 33330  | 33330  | -451  | 10218 | AN1731 |
| 1416 | CONTIG27 | 33076  | 34487  | 1.62 | 7.16E-03 | transcription_start_site | - | 32704  | 32704  | -1077 | 10219 | AN1731 |
| 2924 | CONTIG27 | 37141  | 37491  | 0.99 | 1.79E-01 | transcription_start_site | - | 33330  | 33330  | -3986 | 10218 | AN1731 |
| 2924 | CONTIG27 | 37141  | 37491  | 0.99 | 1.79E-01 | transcription_start_site | - | 32704  | 32704  | -4612 | 10219 | AN1731 |
| 1416 | CONTIG27 | 33076  | 34487  | 1.62 | 7.16E-03 | transcription_start_site | + | 34994  | 34994  | -1212 | 10220 | AN1732 |
| 1416 | CONTIG27 | 33076  | 34487  | 1.62 | 7.16E-03 | transcription_start_site | + | 35463  | 35463  | -1681 | 10221 | AN1732 |
| 1416 | CONTIG27 | 33076  | 34487  | 1.62 | 7.16E-03 | transcription_start_site | + | 35630  | 35630  | -1848 | 10222 | AN1732 |
| 1416 | CONTIG27 | 33076  | 34487  | 1.62 | 7.16E-03 | transcription_start_site | + | 37477  | 37477  | -3695 | 10223 | AN1733 |
| 1416 | CONTIG27 | 33076  | 34487  | 1.62 | 7.16E-03 | transcription_start_site | + | 37653  | 37653  | -3871 | 10224 | AN1733 |
| 1416 | CONTIG27 | 33076  | 34487  | 1.62 | 7.16E-03 | transcription_start_site | + | 37808  | 37808  | -4026 | 10225 | AN1733 |
| 1416 | CONTIG27 | 33076  | 34487  | 1.62 | 7.16E-03 | transcription_start_site | + | 38216  | 38216  | -4434 | 10226 | AN1733 |
| 2924 | CONTIG27 | 37141  | 37491  | 0.99 | 1.79E-01 | transcription_start_site | + | 37477  | 37477  | -161  | 10223 | AN1733 |
| 2924 | CONTIG27 | 37141  | 37491  | 0.99 | 1.79E-01 | transcription_start_site | + | 37653  | 37653  | -337  | 10224 | AN1733 |
| 2924 | CONTIG27 | 37141  | 37491  | 0.99 | 1.79E-01 | transcription_start_site | + | 37808  | 37808  | -492  | 10225 | AN1733 |
| 2924 | CONTIG27 | 37141  | 37491  | 0.99 | 1.79E-01 | transcription_start_site | + | 38216  | 38216  | -900  | 10226 | AN1733 |
| 2926 | CONTIG27 | 38787  | 39436  | 0.99 | 1.93E-01 | transcription_start_site | + | 38216  | 38216  | 895   | 10226 | AN1733 |
| 2926 | CONTIG27 | 38787  | 39436  | 0.99 | 1.93E-01 | transcription_start_site | + | 37808  | 37808  | 1303  | 10225 | AN1733 |
| 2318 | CONTIG27 | 40587  | 40944  | 1.26 | 6.84E-02 | transcription_start_site | - | 40653  | 40653  | -112  | 10227 | AN1734 |
| 2318 | CONTIG27 | 40587  | 40944  | 1.26 | 6.84E-02 | transcription_start_site | - | 40445  | 40445  | -320  | 10228 | AN1734 |
| 2432 | CONTIG27 | 42842  | 44089  | 1.22 | 5.52E-02 | transcription_start_site | - | 40653  | 40653  | -2812 | 10227 | AN1734 |
| 2432 | CONTIG27 | 42842  | 44089  | 1.22 | 5.52E-02 | transcription_start_site | - | 40445  | 40445  | -3020 | 10228 | AN1734 |
| 2432 | CONTIG27 | 42842  | 44089  | 1.22 | 5.52E-02 | transcription_start_site | + | 45965  | 45965  | -2499 | 10229 | AN1736 |
| 2917 | CONTIG27 | 49591  | 51278  | 0.99 | 1.32E-01 | transcription_start_site | - | 50248  | 50248  | -186  | 10230 | AN1737 |
| 2917 | CONTIG27 | 49591  | 51278  | 0.99 | 1.32E-01 | transcription_start_site | + | 51370  | 51370  | -935  | 10231 | AN1738 |
| 2917 | CONTIG27 | 49591  | 51278  | 0.99 | 1.32E-01 | transcription_start_site | + | 51676  | 51676  | -1241 | 10232 | AN1738 |
| 2917 | CONTIG27 | 49591  | 51278  | 0.99 | 1.32E-01 | transcription_start_site | + | 51799  | 51799  | -1364 | 10233 | AN1738 |
| 2917 | CONTIG27 | 49591  | 51278  | 0.99 | 1.32E-01 | transcription_start_site | + | 56261  | 56261  | -5826 | 10241 | AN1740 |

|      |          |        |        |      |          |                          |   |        |        |       |       |        |
|------|----------|--------|--------|------|----------|--------------------------|---|--------|--------|-------|-------|--------|
| 2927 | CONTIG27 | 66536  | 66875  | 0.99 | 1.93E-01 | transcription_start_site | - | 63981  | 63981  | -2724 | 10254 | AN1742 |
| 2927 | CONTIG27 | 66536  | 66875  | 0.99 | 1.93E-01 | transcription_start_site | - | 63753  | 63753  | -2952 | 10255 | AN1742 |
| 2927 | CONTIG27 | 66536  | 66875  | 0.99 | 1.93E-01 | transcription_start_site | - | 63701  | 63701  | -3004 | 10256 | AN1742 |
| 2927 | CONTIG27 | 66536  | 66875  | 0.99 | 1.93E-01 | transcription_start_site | - | 63574  | 63574  | -3131 | 10257 | AN1742 |
| 2927 | CONTIG27 | 66536  | 66875  | 0.99 | 1.93E-01 | transcription_start_site | + | 66584  | 66584  | 121   | 10262 | AN1744 |
| 2927 | CONTIG27 | 66536  | 66875  | 0.99 | 1.93E-01 | transcription_start_site | + | 66088  | 66088  | 617   | 10261 | AN1744 |
| 1872 | CONTIG27 | 71701  | 72275  | 1.42 | 3.70E-02 | transcription_start_site | - | 69703  | 69703  | -2285 | 10263 | AN1745 |
| 1872 | CONTIG27 | 71701  | 72275  | 1.42 | 3.70E-02 | transcription_start_site | - | 69338  | 69338  | -2650 | 10264 | AN1745 |
| 1872 | CONTIG27 | 71701  | 72275  | 1.42 | 3.70E-02 | transcription_start_site | - | 69014  | 69014  | -2974 | 10265 | AN1745 |
| 2177 | CONTIG27 | 69756  | 70102  | 1.3  | 3.99E-02 | transcription_start_site | - | 69703  | 69703  | -226  | 10263 | AN1745 |
| 2177 | CONTIG27 | 69756  | 70102  | 1.3  | 3.99E-02 | transcription_start_site | - | 69338  | 69338  | -591  | 10264 | AN1745 |
| 2177 | CONTIG27 | 69756  | 70102  | 1.3  | 3.99E-02 | transcription_start_site | - | 69014  | 69014  | -915  | 10265 | AN1745 |
| 1872 | CONTIG27 | 71701  | 72275  | 1.42 | 3.70E-02 | transcription_start_site | + | 72035  | 72035  | -47   | 10266 | AN1746 |
| 1872 | CONTIG27 | 71701  | 72275  | 1.42 | 3.70E-02 | transcription_start_site | + | 72387  | 72387  | -399  | 10267 | AN1746 |
| 1872 | CONTIG27 | 71701  | 72275  | 1.42 | 3.70E-02 | transcription_start_site | + | 72577  | 72577  | -589  | 10268 | AN1746 |
| 1872 | CONTIG27 | 71701  | 72275  | 1.42 | 3.70E-02 | transcription_start_site | + | 73301  | 73301  | -1313 | 10269 | AN1746 |
| 1872 | CONTIG27 | 71701  | 72275  | 1.42 | 3.70E-02 | transcription_start_site | + | 75006  | 75006  | -3018 | 10270 | AN1746 |
| 2177 | CONTIG27 | 69756  | 70102  | 1.3  | 3.99E-02 | transcription_start_site | + | 72035  | 72035  | -2106 | 10266 | AN1746 |
| 2177 | CONTIG27 | 69756  | 70102  | 1.3  | 3.99E-02 | transcription_start_site | + | 72387  | 72387  | -2458 | 10267 | AN1746 |
| 2177 | CONTIG27 | 69756  | 70102  | 1.3  | 3.99E-02 | transcription_start_site | + | 72577  | 72577  | -2648 | 10268 | AN1746 |
| 2177 | CONTIG27 | 69756  | 70102  | 1.3  | 3.99E-02 | transcription_start_site | + | 73301  | 73301  | -3372 | 10269 | AN1746 |
| 2177 | CONTIG27 | 69756  | 70102  | 1.3  | 3.99E-02 | transcription_start_site | + | 75006  | 75006  | -5077 | 10270 | AN1746 |
| 2811 | CONTIG27 | 78836  | 79120  | 1.06 | 1.44E-01 | transcription_start_site | - | 79237  | 79237  | 259   | 10273 | AN1747 |
| 2811 | CONTIG27 | 78836  | 79120  | 1.06 | 1.44E-01 | transcription_start_site | - | 78255  | 78255  | -723  | 10274 | AN1747 |
| 2811 | CONTIG27 | 78836  | 79120  | 1.06 | 1.44E-01 | transcription_start_site | + | 81935  | 81935  | -2957 | 10275 | AN1748 |
| 2811 | CONTIG27 | 78836  | 79120  | 1.06 | 1.44E-01 | transcription_start_site | + | 82433  | 82433  | -3455 | 10276 | AN1748 |
| 2811 | CONTIG27 | 78836  | 79120  | 1.06 | 1.44E-01 | transcription_start_site | + | 82530  | 82530  | -3552 | 10277 | AN1748 |
| 2812 | CONTIG27 | 91427  | 91711  | 1.06 | 1.44E-01 | transcription_start_site | - | 89042  | 89042  | -2527 | 10280 | AN1750 |
| 2812 | CONTIG27 | 91427  | 91711  | 1.06 | 1.44E-01 | transcription_start_site | - | 88741  | 88741  | -2828 | 10281 | AN1750 |
| 2812 | CONTIG27 | 91427  | 91711  | 1.06 | 1.44E-01 | transcription_start_site | - | 87484  | 87484  | -4085 | 10282 | AN1750 |
| 2928 | CONTIG27 | 93542  | 93811  | 0.99 | 1.93E-01 | transcription_start_site | - | 89042  | 89042  | -4634 | 10280 | AN1750 |
| 2928 | CONTIG27 | 93542  | 93811  | 0.99 | 1.93E-01 | transcription_start_site | - | 88741  | 88741  | -4935 | 10281 | AN1750 |
| 2559 | CONTIG27 | 97060  | 97414  | 1.18 | 9.24E-02 | transcription_start_site | - | 94090  | 94090  | -3147 | 10284 | AN1752 |
| 2928 | CONTIG27 | 93542  | 93811  | 0.99 | 1.93E-01 | transcription_start_site | - | 94090  | 94090  | 413   | 10284 | AN1752 |
| 2812 | CONTIG27 | 91427  | 91711  | 1.06 | 1.44E-01 | transcription_start_site | + | 94568  | 94568  | -2999 | 10285 | AN1753 |
| 2812 | CONTIG27 | 91427  | 91711  | 1.06 | 1.44E-01 | transcription_start_site | + | 94704  | 94704  | -3135 | 10286 | AN1753 |
| 2928 | CONTIG27 | 93542  | 93811  | 0.99 | 1.93E-01 | transcription_start_site | + | 94568  | 94568  | -891  | 10285 | AN1753 |
| 2928 | CONTIG27 | 93542  | 93811  | 0.99 | 1.93E-01 | transcription_start_site | + | 94704  | 94704  | -1027 | 10286 | AN1753 |
| 2559 | CONTIG27 | 97060  | 97414  | 1.18 | 9.24E-02 | transcription_start_site | - | 96060  | 96060  | -1177 | 10287 | AN1754 |
| 2559 | CONTIG27 | 97060  | 97414  | 1.18 | 9.24E-02 | transcription_start_site | + | 97240  | 97240  | -3    | 10289 | AN1755 |
| 2559 | CONTIG27 | 97060  | 97414  | 1.18 | 9.24E-02 | transcription_start_site | + | 97356  | 97356  | -119  | 10290 | AN1755 |
| 2559 | CONTIG27 | 97060  | 97414  | 1.18 | 9.24E-02 | transcription_start_site | + | 97023  | 97023  | 214   | 10288 | AN1755 |
| 2559 | CONTIG27 | 97060  | 97414  | 1.18 | 9.24E-02 | transcription_start_site | + | 97582  | 97582  | -345  | 10291 | AN1755 |
| 2928 | CONTIG27 | 93542  | 93811  | 0.99 | 1.93E-01 | transcription_start_site | + | 97023  | 97023  | -3346 | 10288 | AN1755 |
| 2928 | CONTIG27 | 93542  | 93811  | 0.99 | 1.93E-01 | transcription_start_site | + | 97240  | 97240  | -3563 | 10289 | AN1755 |
| 2928 | CONTIG27 | 93542  | 93811  | 0.99 | 1.93E-01 | transcription_start_site | + | 97356  | 97356  | -3679 | 10290 | AN1755 |
| 2928 | CONTIG27 | 93542  | 93811  | 0.99 | 1.93E-01 | transcription_start_site | + | 97582  | 97582  | -3905 | 10291 | AN1755 |
| 2559 | CONTIG27 | 97060  | 97414  | 1.18 | 9.24E-02 | transcription_start_site | + | 99800  | 99800  | -2563 | 10292 | AN1756 |
| 208  | CONTIG27 | 108019 | 108428 | 2.92 | 0.00E+00 | transcription_start_site | - | 105821 | 105821 | -2402 | 10299 | AN1759 |
| 208  | CONTIG27 | 108019 | 108428 | 2.92 | 0.00E+00 | transcription_start_site | - | 104795 | 104795 | -3428 | 10300 | AN1759 |
| 208  | CONTIG27 | 108019 | 108428 | 2.92 | 0.00E+00 | transcription_start_site | - | 107361 | 107361 | -862  | 10301 | AN1760 |
| 208  | CONTIG27 | 108019 | 108428 | 2.92 | 0.00E+00 | transcription_start_site | - | 106960 | 106960 | -1263 | 10302 | AN1760 |
| 208  | CONTIG27 | 108019 | 108428 | 2.92 | 0.00E+00 | transcription_start_site | - | 106687 | 106687 | -1536 | 10303 | AN1760 |
| 208  | CONTIG27 | 108019 | 108428 | 2.92 | 0.00E+00 | transcription_start_site | + | 108574 | 108574 | -350  | 10304 | AN1761 |
| 208  | CONTIG27 | 108019 | 108428 | 2.92 | 0.00E+00 | transcription_start_site | + | 108954 | 108954 | -730  | 10305 | AN1761 |
| 208  | CONTIG27 | 108019 | 108428 | 2.92 | 0.00E+00 | transcription_start_site | + | 109022 | 109022 | -798  | 10306 | AN1761 |
| 208  | CONTIG27 | 108019 | 108428 | 2.92 | 0.00E+00 | transcription_start_site | + | 109118 | 109118 | -894  | 10307 | AN1761 |

|      |          |        |        |      |          |                          |   |        |        |       |       |        |
|------|----------|--------|--------|------|----------|--------------------------|---|--------|--------|-------|-------|--------|
| 208  | CONTIG27 | 108019 | 108428 | 2.92 | 0.00E+00 | transcription_start_site | + | 109286 | 109286 | -1062 | 10308 | AN1761 |
| 208  | CONTIG27 | 108019 | 108428 | 2.92 | 0.00E+00 | transcription_start_site | + | 109524 | 109524 | -1300 | 10309 | AN1761 |
| 208  | CONTIG27 | 108019 | 108428 | 2.92 | 0.00E+00 | transcription_start_site | + | 112668 | 112668 | -4444 | 10313 | AN1763 |
| 208  | CONTIG27 | 108019 | 108428 | 2.92 | 0.00E+00 | transcription_start_site | + | 113322 | 113322 | -5098 | 10314 | AN1763 |
| 918  | CONTIG28 | 6096   | 6367   | 1.98 | 1.01E-03 | transcription_start_site | - | 2446   | 2446   | -3785 | 10319 | AN1765 |
| 918  | CONTIG28 | 6096   | 6367   | 1.98 | 1.01E-03 | transcription_start_site | - | 2357   | 2357   | -3874 | 10320 | AN1765 |
| 918  | CONTIG28 | 6096   | 6367   | 1.98 | 1.01E-03 | transcription_start_site | - | 2072   | 2072   | -4159 | 10321 | AN1765 |
| 1573 | CONTIG28 | 1896   | 2150   | 1.55 | 1.11E-02 | transcription_start_site | - | 2072   | 2072   | 49    | 10321 | AN1765 |
| 1573 | CONTIG28 | 1896   | 2150   | 1.55 | 1.11E-02 | transcription_start_site | - | 2357   | 2357   | 334   | 10320 | AN1765 |
| 1573 | CONTIG28 | 1896   | 2150   | 1.55 | 1.11E-02 | transcription_start_site | - | 2446   | 2446   | 423   | 10319 | AN1765 |
| 1573 | CONTIG28 | 1896   | 2150   | 1.55 | 1.11E-02 | transcription_start_site | + | 3343   | 3343   | -1320 | 10322 | AN1766 |
| 1573 | CONTIG28 | 1896   | 2150   | 1.55 | 1.11E-02 | transcription_start_site | + | 3475   | 3475   | -1452 | 10323 | AN1766 |
| 1573 | CONTIG28 | 1896   | 2150   | 1.55 | 1.11E-02 | transcription_start_site | + | 3877   | 3877   | -1854 | 10324 | AN1766 |
| 1573 | CONTIG28 | 1896   | 2150   | 1.55 | 1.11E-02 | transcription_start_site | + | 4189   | 4189   | -2166 | 10325 | AN1766 |
| 918  | CONTIG28 | 6096   | 6367   | 1.98 | 1.01E-03 | transcription_start_site | + | 6850   | 6850   | -618  | 10326 | AN1767 |
| 918  | CONTIG28 | 6096   | 6367   | 1.98 | 1.01E-03 | transcription_start_site | + | 8758   | 8758   | -2526 | 10327 | AN1767 |
| 1573 | CONTIG28 | 1896   | 2150   | 1.55 | 1.11E-02 | transcription_start_site | + | 6850   | 6850   | -4827 | 10326 | AN1767 |
| 2948 | CONTIG28 | 24613  | 25252  | 0.97 | 1.28E-01 | transcription_start_site | - | 22437  | 22437  | -2495 | 10351 | AN1774 |
| 2520 | CONTIG28 | 30393  | 30667  | 1.19 | 5.88E-02 | transcription_start_site | - | 26812  | 26812  | -3718 | 10352 | AN1775 |
| 2520 | CONTIG28 | 30393  | 30667  | 1.19 | 5.88E-02 | transcription_start_site | - | 26408  | 26408  | -4122 | 10353 | AN1775 |
| 2520 | CONTIG28 | 30393  | 30667  | 1.19 | 5.88E-02 | transcription_start_site | - | 25948  | 25948  | -4582 | 10354 | AN1775 |
| 2948 | CONTIG28 | 24613  | 25252  | 0.97 | 1.28E-01 | transcription_start_site | - | 25948  | 25948  | 1015  | 10354 | AN1775 |
| 2520 | CONTIG28 | 30393  | 30667  | 1.19 | 5.88E-02 | transcription_start_site | + | 29663  | 29663  | 867   | 10358 | AN1776 |
| 2948 | CONTIG28 | 24613  | 25252  | 0.97 | 1.28E-01 | transcription_start_site | + | 28534  | 28534  | -3601 | 10355 | AN1776 |
| 2948 | CONTIG28 | 24613  | 25252  | 0.97 | 1.28E-01 | transcription_start_site | + | 28639  | 28639  | -3706 | 10356 | AN1776 |
| 2948 | CONTIG28 | 24613  | 25252  | 0.97 | 1.28E-01 | transcription_start_site | + | 29045  | 29045  | -4112 | 10357 | AN1776 |
| 2948 | CONTIG28 | 24613  | 25252  | 0.97 | 1.28E-01 | transcription_start_site | + | 29663  | 29663  | -4730 | 10358 | AN1776 |
| 2314 | CONTIG28 | 90236  | 90585  | 1.26 | 4.36E-02 | transcription_start_site | - | 87318  | 87318  | -3092 | 10426 | AN1794 |
| 2314 | CONTIG28 | 90236  | 90585  | 1.26 | 4.36E-02 | transcription_start_site | - | 86978  | 86978  | -3432 | 10427 | AN1794 |
| 2314 | CONTIG28 | 90236  | 90585  | 1.26 | 4.36E-02 | transcription_start_site | - | 86035  | 86035  | -4375 | 10428 | AN1794 |
| 2314 | CONTIG28 | 90236  | 90585  | 1.26 | 4.36E-02 | transcription_start_site | - | 85904  | 85904  | -4506 | 10429 | AN1794 |
| 2314 | CONTIG28 | 90236  | 90585  | 1.26 | 4.36E-02 | transcription_start_site | - | 85687  | 85687  | -4723 | 10430 | AN1794 |
| 2314 | CONTIG28 | 90236  | 90585  | 1.26 | 4.36E-02 | transcription_start_site | + | 90457  | 90457  | -46   | 10435 | AN1795 |
| 2314 | CONTIG28 | 90236  | 90585  | 1.26 | 4.36E-02 | transcription_start_site | + | 90087  | 90087  | 323   | 10434 | AN1795 |
| 2314 | CONTIG28 | 90236  | 90585  | 1.26 | 4.36E-02 | transcription_start_site | + | 89941  | 89941  | 469   | 10433 | AN1795 |
| 2314 | CONTIG28 | 90236  | 90585  | 1.26 | 4.36E-02 | transcription_start_site | + | 89848  | 89848  | 562   | 10432 | AN1795 |
| 2314 | CONTIG28 | 90236  | 90585  | 1.26 | 4.36E-02 | transcription_start_site | + | 89717  | 89717  | 693   | 10431 | AN1795 |
| 2314 | CONTIG28 | 90236  | 90585  | 1.26 | 4.36E-02 | transcription_start_site | + | 92144  | 92144  | -1733 | 10436 | AN1796 |
| 2314 | CONTIG28 | 90236  | 90585  | 1.26 | 4.36E-02 | transcription_start_site | + | 92536  | 92536  | -2125 | 10437 | AN1796 |
| 180  | CONTIG28 | 95259  | 95538  | 2.98 | 0.00E+00 | transcription_start_site | + | 96084  | 96084  | -685  | 10438 | AN1797 |
| 180  | CONTIG28 | 95259  | 95538  | 2.98 | 0.00E+00 | transcription_start_site | + | 96237  | 96237  | -838  | 10439 | AN1797 |
| 180  | CONTIG28 | 95259  | 95538  | 2.98 | 0.00E+00 | transcription_start_site | + | 97075  | 97075  | -1676 | 10440 | AN1797 |
| 964  | CONTIG28 | 93621  | 93951  | 1.94 | 1.22E-03 | transcription_start_site | + | 96084  | 96084  | -2298 | 10438 | AN1797 |
| 964  | CONTIG28 | 93621  | 93951  | 1.94 | 1.22E-03 | transcription_start_site | + | 96237  | 96237  | -2451 | 10439 | AN1797 |
| 964  | CONTIG28 | 93621  | 93951  | 1.94 | 1.22E-03 | transcription_start_site | + | 97075  | 97075  | -3289 | 10440 | AN1797 |
| 1733 | CONTIG29 | 5477   | 5836   | 1.49 | 9.24E-02 | transcription_start_site | + | 5354   | 5354   | 302   | 10442 | AN1799 |
| 2240 | CONTIG29 | 6082   | 6666   | 1.29 | 1.66E-01 | transcription_start_site | + | 5354   | 5354   | 1020  | 10442 | AN1799 |
| 514  | CONTIG29 | 7217   | 7556   | 2.43 | 3.61E-03 | transcription_start_site | + | 7741   | 7741   | -354  | 10443 | AN1800 |
| 514  | CONTIG29 | 7217   | 7556   | 2.43 | 3.61E-03 | transcription_start_site | + | 7877   | 7877   | -490  | 10444 | AN1800 |
| 514  | CONTIG29 | 7217   | 7556   | 2.43 | 3.61E-03 | transcription_start_site | + | 7964   | 7964   | -577  | 10445 | AN1800 |
| 514  | CONTIG29 | 7217   | 7556   | 2.43 | 3.61E-03 | transcription_start_site | + | 8571   | 8571   | -1184 | 10446 | AN1800 |
| 514  | CONTIG29 | 7217   | 7556   | 2.43 | 3.61E-03 | transcription_start_site | + | 10782  | 10782  | -3395 | 10447 | AN1800 |
| 514  | CONTIG29 | 7217   | 7556   | 2.43 | 3.61E-03 | transcription_start_site | + | 10953  | 10953  | -3566 | 10448 | AN1800 |
| 514  | CONTIG29 | 7217   | 7556   | 2.43 | 3.61E-03 | transcription_start_site | + | 11144  | 11144  | -3757 | 10449 | AN1800 |
| 1733 | CONTIG29 | 5477   | 5836   | 1.49 | 9.24E-02 | transcription_start_site | + | 7741   | 7741   | -2084 | 10443 | AN1800 |
| 1733 | CONTIG29 | 5477   | 5836   | 1.49 | 9.24E-02 | transcription_start_site | + | 7877   | 7877   | -2220 | 10444 | AN1800 |
| 1733 | CONTIG29 | 5477   | 5836   | 1.49 | 9.24E-02 | transcription_start_site | + | 7964   | 7964   | -2307 | 10445 | AN1800 |

|      |          |       |       |      |          |                          |   |       |       |       |       |        |
|------|----------|-------|-------|------|----------|--------------------------|---|-------|-------|-------|-------|--------|
| 1733 | CONTIG29 | 5477  | 5836  | 1.49 | 9.24E-02 | transcription_start_site | + | 8571  | 8571  | -2914 | 10446 | AN1800 |
| 1733 | CONTIG29 | 5477  | 5836  | 1.49 | 9.24E-02 | transcription_start_site | + | 10782 | 10782 | -5125 | 10447 | AN1800 |
| 2240 | CONTIG29 | 6082  | 6666  | 1.29 | 1.66E-01 | transcription_start_site | + | 7741  | 7741  | -1367 | 10443 | AN1800 |
| 2240 | CONTIG29 | 6082  | 6666  | 1.29 | 1.66E-01 | transcription_start_site | + | 7877  | 7877  | -1503 | 10444 | AN1800 |
| 2240 | CONTIG29 | 6082  | 6666  | 1.29 | 1.66E-01 | transcription_start_site | + | 7964  | 7964  | -1590 | 10445 | AN1800 |
| 2240 | CONTIG29 | 6082  | 6666  | 1.29 | 1.66E-01 | transcription_start_site | + | 8571  | 8571  | -2197 | 10446 | AN1800 |
| 2240 | CONTIG29 | 6082  | 6666  | 1.29 | 1.66E-01 | transcription_start_site | + | 10782 | 10782 | -4408 | 10447 | AN1800 |
| 2240 | CONTIG29 | 6082  | 6666  | 1.29 | 1.66E-01 | transcription_start_site | + | 10953 | 10953 | -4579 | 10448 | AN1800 |
| 2240 | CONTIG29 | 6082  | 6666  | 1.29 | 1.66E-01 | transcription_start_site | + | 11144 | 11144 | -4770 | 10449 | AN1800 |
| 2394 | CONTIG29 | 12242 | 12581 | 1.24 | 1.93E-01 | transcription_start_site | - | 12274 | 12274 | -137  | 10450 | AN1801 |
| 2394 | CONTIG29 | 12242 | 12581 | 1.24 | 1.93E-01 | transcription_start_site | - | 11535 | 11535 | -876  | 10451 | AN1801 |
| 2394 | CONTIG29 | 12242 | 12581 | 1.24 | 1.93E-01 | transcription_start_site | + | 14355 | 14355 | -1943 | 10452 | AN1802 |
| 2394 | CONTIG29 | 12242 | 12581 | 1.24 | 1.93E-01 | transcription_start_site | + | 14423 | 14423 | -2011 | 10453 | AN1802 |
| 2394 | CONTIG29 | 12242 | 12581 | 1.24 | 1.93E-01 | transcription_start_site | + | 14514 | 14514 | -2102 | 10454 | AN1802 |
| 2394 | CONTIG29 | 12242 | 12581 | 1.24 | 1.93E-01 | transcription_start_site | + | 14658 | 14658 | -2246 | 10455 | AN1802 |
| 2394 | CONTIG29 | 12242 | 12581 | 1.24 | 1.93E-01 | transcription_start_site | + | 14821 | 14821 | -2409 | 10456 | AN1802 |
| 2394 | CONTIG29 | 12242 | 12581 | 1.24 | 1.93E-01 | transcription_start_site | + | 14922 | 14922 | -2510 | 10457 | AN1802 |
| 2394 | CONTIG29 | 12242 | 12581 | 1.24 | 1.93E-01 | transcription_start_site | + | 15004 | 15004 | -2592 | 10458 | AN1802 |
| 669  | CONTIG29 | 26718 | 26977 | 2.23 | 7.85E-03 | transcription_start_site | - | 27823 | 27823 | 975   | 10462 | AN1805 |
| 1606 | CONTIG29 | 39844 | 40188 | 1.54 | 8.01E-02 | transcription_start_site | - | 37458 | 37458 | -2558 | 10469 | AN1809 |
| 1606 | CONTIG29 | 39844 | 40188 | 1.54 | 8.01E-02 | transcription_start_site | - | 37233 | 37233 | -2783 | 10470 | AN1809 |
| 1606 | CONTIG29 | 39844 | 40188 | 1.54 | 8.01E-02 | transcription_start_site | - | 36937 | 36937 | -3079 | 10471 | AN1809 |
| 1606 | CONTIG29 | 39844 | 40188 | 1.54 | 8.01E-02 | transcription_start_site | - | 36359 | 36359 | -3657 | 10472 | AN1809 |
| 1606 | CONTIG29 | 39844 | 40188 | 1.54 | 8.01E-02 | transcription_start_site | - | 36145 | 36145 | -3871 | 10473 | AN1809 |
| 1606 | CONTIG29 | 39844 | 40188 | 1.54 | 8.01E-02 | transcription_start_site | - | 39614 | 39614 | -402  | 10474 | AN1810 |
| 1606 | CONTIG29 | 39844 | 40188 | 1.54 | 8.01E-02 | transcription_start_site | - | 39079 | 39079 | -937  | 10475 | AN1810 |
| 1606 | CONTIG29 | 39844 | 40188 | 1.54 | 8.01E-02 | transcription_start_site | - | 38330 | 38330 | -1686 | 10476 | AN1810 |
| 1606 | CONTIG29 | 39844 | 40188 | 1.54 | 8.01E-02 | transcription_start_site | + | 39954 | 39954 | 62    | 10477 | AN1811 |
| 1606 | CONTIG29 | 39844 | 40188 | 1.54 | 8.01E-02 | transcription_start_site | + | 40315 | 40315 | -299  | 10478 | AN1811 |
| 1606 | CONTIG29 | 39844 | 40188 | 1.54 | 8.01E-02 | transcription_start_site | + | 40883 | 40883 | -867  | 10479 | AN1811 |
| 1606 | CONTIG29 | 39844 | 40188 | 1.54 | 8.01E-02 | transcription_start_site | + | 41004 | 41004 | -988  | 10480 | AN1811 |
| 1600 | CONTIG29 | 52509 | 53753 | 1.54 | 5.52E-02 | transcription_start_site | - | 54383 | 54383 | 1252  | 10489 | AN1814 |
| 1600 | CONTIG29 | 52509 | 53753 | 1.54 | 5.52E-02 | transcription_start_site | - | 54677 | 54677 | 1546  | 10488 | AN1814 |
| 2235 | CONTIG29 | 68644 | 69521 | 1.29 | 1.50E-01 | transcription_start_site | - | 63894 | 63894 | -5188 | 10493 | AN1817 |
| 1239 | CONTIG29 | 69544 | 69803 | 1.74 | 4.36E-02 | transcription_start_site | - | 66525 | 66525 | -3148 | 10495 | AN1818 |
| 1239 | CONTIG29 | 69544 | 69803 | 1.74 | 4.36E-02 | transcription_start_site | - | 66231 | 66231 | -3442 | 10496 | AN1818 |
| 1239 | CONTIG29 | 69544 | 69803 | 1.74 | 4.36E-02 | transcription_start_site | - | 66130 | 66130 | -3543 | 10497 | AN1818 |
| 1239 | CONTIG29 | 69544 | 69803 | 1.74 | 4.36E-02 | transcription_start_site | - | 66032 | 66032 | -3641 | 10498 | AN1818 |
| 1239 | CONTIG29 | 69544 | 69803 | 1.74 | 4.36E-02 | transcription_start_site | - | 65828 | 65828 | -3845 | 10499 | AN1818 |
| 1239 | CONTIG29 | 69544 | 69803 | 1.74 | 4.36E-02 | transcription_start_site | - | 65635 | 65635 | -4038 | 10500 | AN1818 |
| 1239 | CONTIG29 | 69544 | 69803 | 1.74 | 4.36E-02 | transcription_start_site | - | 65342 | 65342 | -4331 | 10501 | AN1818 |
| 1239 | CONTIG29 | 69544 | 69803 | 1.74 | 4.36E-02 | transcription_start_site | - | 65200 | 65200 | -4473 | 10502 | AN1818 |
| 2235 | CONTIG29 | 68644 | 69521 | 1.29 | 1.50E-01 | transcription_start_site | - | 66525 | 66525 | -2557 | 10495 | AN1818 |
| 2235 | CONTIG29 | 68644 | 69521 | 1.29 | 1.50E-01 | transcription_start_site | - | 66231 | 66231 | -2851 | 10496 | AN1818 |
| 2235 | CONTIG29 | 68644 | 69521 | 1.29 | 1.50E-01 | transcription_start_site | - | 66130 | 66130 | -2952 | 10497 | AN1818 |
| 2235 | CONTIG29 | 68644 | 69521 | 1.29 | 1.50E-01 | transcription_start_site | - | 66032 | 66032 | -3050 | 10498 | AN1818 |
| 2235 | CONTIG29 | 68644 | 69521 | 1.29 | 1.50E-01 | transcription_start_site | - | 65828 | 65828 | -3254 | 10499 | AN1818 |
| 2235 | CONTIG29 | 68644 | 69521 | 1.29 | 1.50E-01 | transcription_start_site | - | 65635 | 65635 | -3447 | 10500 | AN1818 |
| 2235 | CONTIG29 | 68644 | 69521 | 1.29 | 1.50E-01 | transcription_start_site | - | 65342 | 65342 | -3740 | 10501 | AN1818 |
| 2235 | CONTIG29 | 68644 | 69521 | 1.29 | 1.50E-01 | transcription_start_site | - | 65200 | 65200 | -3882 | 10502 | AN1818 |
| 1239 | CONTIG29 | 69544 | 69803 | 1.74 | 4.36E-02 | transcription_start_site | - | 68200 | 68200 | -1473 | 10503 | AN1819 |
| 1239 | CONTIG29 | 69544 | 69803 | 1.74 | 4.36E-02 | transcription_start_site | - | 67134 | 67134 | -2539 | 10504 | AN1819 |
| 2235 | CONTIG29 | 68644 | 69521 | 1.29 | 1.50E-01 | transcription_start_site | - | 68200 | 68200 | -882  | 10503 | AN1819 |
| 2235 | CONTIG29 | 68644 | 69521 | 1.29 | 1.50E-01 | transcription_start_site | - | 67134 | 67134 | -1948 | 10504 | AN1819 |
| 1239 | CONTIG29 | 69544 | 69803 | 1.74 | 4.36E-02 | transcription_start_site | + | 69522 | 69522 | 151   | 10506 | AN1820 |
| 1239 | CONTIG29 | 69544 | 69803 | 1.74 | 4.36E-02 | transcription_start_site | + | 70287 | 70287 | -613  | 10507 | AN1820 |
| 1239 | CONTIG29 | 69544 | 69803 | 1.74 | 4.36E-02 | transcription_start_site | + | 68785 | 68785 | 888   | 10505 | AN1820 |

|      |          |        |        |      |          |                          |   |        |        |       |       |        |
|------|----------|--------|--------|------|----------|--------------------------|---|--------|--------|-------|-------|--------|
| 1239 | CONTIG29 | 69544  | 69803  | 1.74 | 4.36E-02 | transcription_start_site | + | 70901  | 70901  | -1227 | 10508 | AN1820 |
| 2235 | CONTIG29 | 68644  | 69521  | 1.29 | 1.50E-01 | transcription_start_site | + | 68785  | 68785  | 297   | 10505 | AN1820 |
| 2235 | CONTIG29 | 68644  | 69521  | 1.29 | 1.50E-01 | transcription_start_site | + | 69522  | 69522  | -439  | 10506 | AN1820 |
| 2235 | CONTIG29 | 68644  | 69521  | 1.29 | 1.50E-01 | transcription_start_site | + | 70287  | 70287  | -1204 | 10507 | AN1820 |
| 2235 | CONTIG29 | 68644  | 69521  | 1.29 | 1.50E-01 | transcription_start_site | + | 70901  | 70901  | -1818 | 10508 | AN1820 |
| 719  | CONTIG29 | 73204  | 73478  | 2.18 | 8.81E-03 | transcription_start_site | - | 73831  | 73831  | 490   | 10509 | AN1821 |
| 719  | CONTIG29 | 73204  | 73478  | 2.18 | 8.81E-03 | transcription_start_site | + | 74166  | 74166  | -825  | 10510 | AN1822 |
| 719  | CONTIG29 | 73204  | 73478  | 2.18 | 8.81E-03 | transcription_start_site | + | 74769  | 74769  | -1428 | 10511 | AN1822 |
| 1239 | CONTIG29 | 69544  | 69803  | 1.74 | 4.36E-02 | transcription_start_site | + | 74166  | 74166  | -4492 | 10510 | AN1822 |
| 1239 | CONTIG29 | 69544  | 69803  | 1.74 | 4.36E-02 | transcription_start_site | + | 74769  | 74769  | -5095 | 10511 | AN1822 |
| 2235 | CONTIG29 | 68644  | 69521  | 1.29 | 1.50E-01 | transcription_start_site | + | 74166  | 74166  | -5083 | 10510 | AN1822 |
| 719  | CONTIG29 | 73204  | 73478  | 2.18 | 8.81E-03 | transcription_start_site | + | 76728  | 76728  | -3387 | 10512 | AN1823 |
| 719  | CONTIG29 | 73204  | 73478  | 2.18 | 8.81E-03 | transcription_start_site | + | 76943  | 76943  | -3602 | 10513 | AN1823 |
| 720  | CONTIG29 | 79879  | 80908  | 2.18 | 8.81E-03 | transcription_start_site | - | 80730  | 80730  | 336   | 10514 | AN1824 |
| 720  | CONTIG29 | 79879  | 80908  | 2.18 | 8.81E-03 | transcription_start_site | - | 78853  | 78853  | -1540 | 10515 | AN1824 |
| 2241 | CONTIG29 | 84986  | 85255  | 1.29 | 1.66E-01 | transcription_start_site | - | 80730  | 80730  | -4390 | 10514 | AN1824 |
| 2241 | CONTIG29 | 84986  | 85255  | 1.29 | 1.66E-01 | transcription_start_site | - | 82491  | 82491  | -2629 | 10516 | AN1825 |
| 720  | CONTIG29 | 79879  | 80908  | 2.18 | 8.81E-03 | transcription_start_site | + | 83121  | 83121  | -2727 | 10517 | AN1826 |
| 720  | CONTIG29 | 79879  | 80908  | 2.18 | 8.81E-03 | transcription_start_site | + | 84013  | 84013  | -3619 | 10518 | AN1826 |
| 2241 | CONTIG29 | 84986  | 85255  | 1.29 | 1.66E-01 | transcription_start_site | + | 84013  | 84013  | 1107  | 10518 | AN1826 |
| 2092 | CONTIG29 | 101101 | 101470 | 1.34 | 1.44E-01 | transcription_start_site | - | 97878  | 97878  | -3407 | 10541 | AN1832 |
| 2092 | CONTIG29 | 101101 | 101470 | 1.34 | 1.44E-01 | transcription_start_site | - | 97478  | 97478  | -3807 | 10542 | AN1832 |
| 2092 | CONTIG29 | 101101 | 101470 | 1.34 | 1.44E-01 | transcription_start_site | - | 96989  | 96989  | -4296 | 10543 | AN1832 |
| 2236 | CONTIG29 | 101791 | 102290 | 1.29 | 1.50E-01 | transcription_start_site | - | 97878  | 97878  | -4162 | 10541 | AN1832 |
| 2236 | CONTIG29 | 101791 | 102290 | 1.29 | 1.50E-01 | transcription_start_site | - | 97478  | 97478  | -4562 | 10542 | AN1832 |
| 2236 | CONTIG29 | 101791 | 102290 | 1.29 | 1.50E-01 | transcription_start_site | - | 96989  | 96989  | -5051 | 10543 | AN1832 |
| 2092 | CONTIG29 | 101101 | 101470 | 1.34 | 1.44E-01 | transcription_start_site | + | 101382 | 101382 | -96   | 10548 | AN1834 |
| 2092 | CONTIG29 | 101101 | 101470 | 1.34 | 1.44E-01 | transcription_start_site | + | 102672 | 102672 | -1386 | 10549 | AN1834 |
| 2092 | CONTIG29 | 101101 | 101470 | 1.34 | 1.44E-01 | transcription_start_site | + | 103702 | 103702 | -2416 | 10550 | AN1834 |
| 2236 | CONTIG29 | 101791 | 102290 | 1.29 | 1.50E-01 | transcription_start_site | + | 102672 | 102672 | -631  | 10549 | AN1834 |
| 2236 | CONTIG29 | 101791 | 102290 | 1.29 | 1.50E-01 | transcription_start_site | + | 101382 | 101382 | 658   | 10548 | AN1834 |
| 2236 | CONTIG29 | 101791 | 102290 | 1.29 | 1.50E-01 | transcription_start_site | + | 103702 | 103702 | -1661 | 10550 | AN1834 |
| 767  | CONTIG29 | 106140 | 106404 | 2.13 | 1.11E-02 | transcription_start_site | + | 105428 | 105428 | 844   | 10554 | AN1835 |
| 2092 | CONTIG29 | 101101 | 101470 | 1.34 | 1.44E-01 | transcription_start_site | + | 104312 | 104312 | -3026 | 10551 | AN1835 |
| 2092 | CONTIG29 | 101101 | 101470 | 1.34 | 1.44E-01 | transcription_start_site | + | 104635 | 104635 | -3349 | 10552 | AN1835 |
| 2092 | CONTIG29 | 101101 | 101470 | 1.34 | 1.44E-01 | transcription_start_site | + | 104919 | 104919 | -3633 | 10553 | AN1835 |
| 2092 | CONTIG29 | 101101 | 101470 | 1.34 | 1.44E-01 | transcription_start_site | + | 105428 | 105428 | -4142 | 10554 | AN1835 |
| 2236 | CONTIG29 | 101791 | 102290 | 1.29 | 1.50E-01 | transcription_start_site | + | 104312 | 104312 | -2271 | 10551 | AN1835 |
| 2236 | CONTIG29 | 101791 | 102290 | 1.29 | 1.50E-01 | transcription_start_site | + | 104635 | 104635 | -2594 | 10552 | AN1835 |
| 2236 | CONTIG29 | 101791 | 102290 | 1.29 | 1.50E-01 | transcription_start_site | + | 104919 | 104919 | -2878 | 10553 | AN1835 |
| 2236 | CONTIG29 | 101791 | 102290 | 1.29 | 1.50E-01 | transcription_start_site | + | 105428 | 105428 | -3387 | 10554 | AN1835 |
| 2242 | CONTIG29 | 104865 | 105744 | 1.29 | 1.66E-01 | transcription_start_site | + | 105428 | 105428 | -123  | 10554 | AN1835 |
| 2242 | CONTIG29 | 104865 | 105744 | 1.29 | 1.66E-01 | transcription_start_site | + | 104919 | 104919 | 385   | 10553 | AN1835 |
| 2242 | CONTIG29 | 104865 | 105744 | 1.29 | 1.66E-01 | transcription_start_site | + | 104635 | 104635 | 669   | 10552 | AN1835 |
| 2242 | CONTIG29 | 104865 | 105744 | 1.29 | 1.66E-01 | transcription_start_site | + | 104312 | 104312 | 992   | 10551 | AN1835 |
| 515  | CONTIG29 | 113118 | 113470 | 2.43 | 3.61E-03 | transcription_start_site | - | 109386 | 109386 | -3908 | 10555 | AN1837 |
| 515  | CONTIG29 | 113118 | 113470 | 2.43 | 3.61E-03 | transcription_start_site | - | 109035 | 109035 | -4259 | 10556 | AN1837 |
| 515  | CONTIG29 | 113118 | 113470 | 2.43 | 3.61E-03 | transcription_start_site | - | 108895 | 108895 | -4399 | 10557 | AN1837 |
| 515  | CONTIG29 | 113118 | 113470 | 2.43 | 3.61E-03 | transcription_start_site | - | 110929 | 110929 | -2365 | 10558 | AN1838 |
| 515  | CONTIG29 | 113118 | 113470 | 2.43 | 3.61E-03 | transcription_start_site | - | 110675 | 110675 | -2619 | 10559 | AN1838 |
| 515  | CONTIG29 | 113118 | 113470 | 2.43 | 3.61E-03 | transcription_start_site | - | 112786 | 112786 | -508  | 10560 | AN1839 |
| 515  | CONTIG29 | 113118 | 113470 | 2.43 | 3.61E-03 | transcription_start_site | - | 112367 | 112367 | -927  | 10561 | AN1839 |
| 515  | CONTIG29 | 113118 | 113470 | 2.43 | 3.61E-03 | transcription_start_site | - | 112126 | 112126 | -1168 | 10562 | AN1839 |
| 1163 | CONTIG29 | 121803 | 122092 | 1.79 | 3.70E-02 | transcription_start_site | - | 116884 | 116884 | -5063 | 10563 | AN1840 |
| 1163 | CONTIG29 | 121803 | 122092 | 1.79 | 3.70E-02 | transcription_start_site | - | 118237 | 118237 | -3710 | 10565 | AN1841 |
| 1163 | CONTIG29 | 121803 | 122092 | 1.79 | 3.70E-02 | transcription_start_site | - | 117881 | 117881 | -4066 | 10566 | AN1841 |
| 1163 | CONTIG29 | 121803 | 122092 | 1.79 | 3.70E-02 | transcription_start_site | - | 117734 | 117734 | -4213 | 10567 | AN1841 |



|      |          |        |        |      |          |                          |   |        |        |       |       |        |
|------|----------|--------|--------|------|----------|--------------------------|---|--------|--------|-------|-------|--------|
| 1163 | CONTIG29 | 121803 | 122092 | 1.79 | 3.70E-02 | transcription_start_site | + | 120870 | 120870 | 1077  | 10571 | AN1843 |
| 1163 | CONTIG29 | 121803 | 122092 | 1.79 | 3.70E-02 | transcription_start_site | + | 120805 | 120805 | 1142  | 10570 | AN1843 |
| 1163 | CONTIG29 | 121803 | 122092 | 1.79 | 3.70E-02 | transcription_start_site | + | 122707 | 122707 | -759  | 10572 | AN1844 |
| 1163 | CONTIG29 | 121803 | 122092 | 1.79 | 3.70E-02 | transcription_start_site | + | 123256 | 123256 | -1308 | 10573 | AN1844 |
| 1163 | CONTIG29 | 121803 | 122092 | 1.79 | 3.70E-02 | transcription_start_site | + | 125457 | 125457 | -3509 | 10574 | AN1845 |
| 1163 | CONTIG29 | 121803 | 122092 | 1.79 | 3.70E-02 | transcription_start_site | + | 125612 | 125612 | -3664 | 10575 | AN1845 |
| 159  | CONTIG29 | 130594 | 130853 | 3.03 | 2.39E-04 | transcription_start_site | - | 127557 | 127557 | -3166 | 10576 | AN1846 |
| 159  | CONTIG29 | 130594 | 130853 | 3.03 | 2.39E-04 | transcription_start_site | - | 126754 | 126754 | -3969 | 10577 | AN1846 |
| 818  | CONTIG29 | 132234 | 132729 | 2.08 | 1.30E-02 | transcription_start_site | - | 127557 | 127557 | -4924 | 10576 | AN1846 |
| 159  | CONTIG29 | 130594 | 130853 | 3.03 | 2.39E-04 | transcription_start_site | - | 131630 | 131630 | 906   | 10579 | AN1847 |
| 818  | CONTIG29 | 132234 | 132729 | 2.08 | 1.30E-02 | transcription_start_site | - | 132368 | 132368 | -113  | 10578 | AN1847 |
| 818  | CONTIG29 | 132234 | 132729 | 2.08 | 1.30E-02 | transcription_start_site | - | 131630 | 131630 | -851  | 10579 | AN1847 |
| 1386 | CONTIG29 | 178953 | 179307 | 1.64 | 5.88E-02 | transcription_start_site | - | 175603 | 175603 | -3527 | 10632 | AN1864 |
| 1386 | CONTIG29 | 178953 | 179307 | 1.64 | 5.88E-02 | transcription_start_site | - | 174741 | 174741 | -4389 | 10633 | AN1864 |
| 1386 | CONTIG29 | 178953 | 179307 | 1.64 | 5.88E-02 | transcription_start_site | + | 178535 | 178535 | 595   | 10636 | AN1865 |
| 1386 | CONTIG29 | 178953 | 179307 | 1.64 | 5.88E-02 | transcription_start_site | + | 179303 | 179303 | -173  | 10637 | AN1866 |
| 1386 | CONTIG29 | 178953 | 179307 | 1.64 | 5.88E-02 | transcription_start_site | + | 179548 | 179548 | -418  | 10638 | AN1866 |
| 1386 | CONTIG29 | 178953 | 179307 | 1.64 | 5.88E-02 | transcription_start_site | + | 179993 | 179993 | -863  | 10639 | AN1866 |
| 1386 | CONTIG29 | 178953 | 179307 | 1.64 | 5.88E-02 | transcription_start_site | + | 180218 | 180218 | -1088 | 10640 | AN1866 |
| 1386 | CONTIG29 | 178953 | 179307 | 1.64 | 5.88E-02 | transcription_start_site | + | 180636 | 180636 | -1506 | 10641 | AN1866 |
| 1492 | CONTIG29 | 183833 | 184177 | 1.59 | 5.05E-02 | transcription_start_site | - | 182071 | 182071 | -1934 | 10642 | AN1867 |
| 1492 | CONTIG29 | 183833 | 184177 | 1.59 | 5.05E-02 | transcription_start_site | - | 181140 | 181140 | -2865 | 10643 | AN1867 |
| 1492 | CONTIG29 | 183833 | 184177 | 1.59 | 5.05E-02 | transcription_start_site | - | 181022 | 181022 | -2983 | 10644 | AN1867 |
| 1386 | CONTIG29 | 178953 | 179307 | 1.64 | 5.88E-02 | transcription_start_site | + | 183007 | 183007 | -3877 | 10645 | AN1868 |
| 1386 | CONTIG29 | 178953 | 179307 | 1.64 | 5.88E-02 | transcription_start_site | + | 183478 | 183478 | -4348 | 10646 | AN1868 |
| 1386 | CONTIG29 | 178953 | 179307 | 1.64 | 5.88E-02 | transcription_start_site | + | 183588 | 183588 | -4458 | 10647 | AN1868 |
| 1492 | CONTIG29 | 183833 | 184177 | 1.59 | 5.05E-02 | transcription_start_site | + | 183588 | 183588 | 417   | 10647 | AN1868 |
| 1492 | CONTIG29 | 183833 | 184177 | 1.59 | 5.05E-02 | transcription_start_site | + | 183478 | 183478 | 527   | 10646 | AN1868 |
| 1492 | CONTIG29 | 183833 | 184177 | 1.59 | 5.05E-02 | transcription_start_site | + | 183007 | 183007 | 998   | 10645 | AN1868 |
| 721  | CONTIG29 | 187278 | 187552 | 2.18 | 8.81E-03 | transcription_start_site | - | 186081 | 186081 | -1334 | 10648 | AN1869 |
| 721  | CONTIG29 | 187278 | 187552 | 2.18 | 8.81E-03 | transcription_start_site | - | 185994 | 185994 | -1421 | 10649 | AN1869 |
| 721  | CONTIG29 | 187278 | 187552 | 2.18 | 8.81E-03 | transcription_start_site | - | 185884 | 185884 | -1531 | 10650 | AN1869 |
| 721  | CONTIG29 | 187278 | 187552 | 2.18 | 8.81E-03 | transcription_start_site | + | 187267 | 187267 | 148   | 10651 | AN1870 |
| 721  | CONTIG29 | 187278 | 187552 | 2.18 | 8.81E-03 | transcription_start_site | + | 188055 | 188055 | -640  | 10652 | AN1870 |
| 1492 | CONTIG29 | 183833 | 184177 | 1.59 | 5.05E-02 | transcription_start_site | + | 187267 | 187267 | -3262 | 10651 | AN1870 |
| 1492 | CONTIG29 | 183833 | 184177 | 1.59 | 5.05E-02 | transcription_start_site | + | 188055 | 188055 | -4050 | 10652 | AN1870 |
| 721  | CONTIG29 | 187278 | 187552 | 2.18 | 8.81E-03 | transcription_start_site | + | 192188 | 192188 | -4773 | 10656 | AN1872 |
| 721  | CONTIG29 | 187278 | 187552 | 2.18 | 8.81E-03 | transcription_start_site | + | 192398 | 192398 | -4983 | 10657 | AN1872 |
| 2395 | CONTIG29 | 224184 | 224528 | 1.24 | 1.93E-01 | transcription_start_site | - | 221300 | 221300 | -3056 | 10683 | AN1879 |
| 2395 | CONTIG29 | 224184 | 224528 | 1.24 | 1.93E-01 | transcription_start_site | - | 220989 | 220989 | -3367 | 10684 | AN1879 |
| 2395 | CONTIG29 | 224184 | 224528 | 1.24 | 1.93E-01 | transcription_start_site | - | 220806 | 220806 | -3550 | 10685 | AN1879 |
| 2395 | CONTIG29 | 224184 | 224528 | 1.24 | 1.93E-01 | transcription_start_site | - | 220622 | 220622 | -3734 | 10686 | AN1879 |
| 2395 | CONTIG29 | 224184 | 224528 | 1.24 | 1.93E-01 | transcription_start_site | - | 220027 | 220027 | -4329 | 10687 | AN1879 |
| 2395 | CONTIG29 | 224184 | 224528 | 1.24 | 1.93E-01 | transcription_start_site | - | 219790 | 219790 | -4566 | 10688 | AN1879 |
| 2395 | CONTIG29 | 224184 | 224528 | 1.24 | 1.93E-01 | transcription_start_site | + | 223483 | 223483 | 873   | 10690 | AN1880 |
| 2395 | CONTIG29 | 224184 | 224528 | 1.24 | 1.93E-01 | transcription_start_site | + | 223366 | 223366 | 990   | 10689 | AN1880 |
| 2395 | CONTIG29 | 224184 | 224528 | 1.24 | 1.93E-01 | transcription_start_site | + | 228548 | 228548 | -4192 | 10691 | AN1881 |
| 2395 | CONTIG29 | 224184 | 224528 | 1.24 | 1.93E-01 | transcription_start_site | + | 229250 | 229250 | -4894 | 10692 | AN1881 |
| 1045 | CONTIG29 | 257637 | 258064 | 1.88 | 1.44E-02 | transcription_start_site | - | 256444 | 256444 | -1406 | 10733 | AN1893 |
| 1045 | CONTIG29 | 257637 | 258064 | 1.88 | 1.44E-02 | transcription_start_site | - | 256167 | 256167 | -1683 | 10734 | AN1893 |
| 1045 | CONTIG29 | 257637 | 258064 | 1.88 | 1.44E-02 | transcription_start_site | - | 255755 | 255755 | -2095 | 10735 | AN1893 |
| 1045 | CONTIG29 | 257637 | 258064 | 1.88 | 1.44E-02 | transcription_start_site | - | 254766 | 254766 | -3084 | 10736 | AN1893 |
| 1045 | CONTIG29 | 257637 | 258064 | 1.88 | 1.44E-02 | transcription_start_site | + | 258483 | 258483 | -632  | 10737 | AN1894 |
| 1045 | CONTIG29 | 257637 | 258064 | 1.88 | 1.44E-02 | transcription_start_site | + | 258722 | 258722 | -871  | 10738 | AN1894 |
| 1045 | CONTIG29 | 257637 | 258064 | 1.88 | 1.44E-02 | transcription_start_site | + | 261357 | 261357 | -3506 | 10739 | AN1895 |
| 507  | CONTIG29 | 276226 | 276595 | 2.43 | 4.46E-04 | transcription_start_site | - | 271445 | 271445 | -4965 | 10750 | AN1900 |
| 160  | CONTIG29 | 282976 | 283269 | 3.03 | 2.39E-04 | transcription_start_site | - | 282330 | 282330 | -792  | 10762 | AN1902 |

|      |          |        |        |      |          |                          |   |        |        |       |       |        |
|------|----------|--------|--------|------|----------|--------------------------|---|--------|--------|-------|-------|--------|
| 160  | CONTIG29 | 282976 | 283269 | 3.03 | 2.39E-04 | transcription_start_site | - | 282184 | 282184 | -938  | 10763 | AN1902 |
| 231  | CONTIG29 | 286435 | 286929 | 2.88 | 5.64E-04 | transcription_start_site | - | 282330 | 282330 | -4352 | 10762 | AN1902 |
| 231  | CONTIG29 | 286435 | 286929 | 2.88 | 5.64E-04 | transcription_start_site | - | 282184 | 282184 | -4498 | 10763 | AN1902 |
| 930  | CONTIG29 | 329636 | 330058 | 1.98 | 1.84E-02 | transcription_start_site | - | 329388 | 329388 | -459  | 10813 | AN1917 |
| 930  | CONTIG29 | 329636 | 330058 | 1.98 | 1.84E-02 | transcription_start_site | - | 328419 | 328419 | -1428 | 10814 | AN1917 |
| 1387 | CONTIG29 | 334286 | 334720 | 1.64 | 5.88E-02 | transcription_start_site | - | 329388 | 329388 | -5115 | 10813 | AN1917 |
| 54   | CONTIG29 | 336301 | 337640 | 3.42 | 0.00E+00 | transcription_start_site | - | 336073 | 336073 | -897  | 10815 | AN1918 |
| 54   | CONTIG29 | 336301 | 337640 | 3.42 | 0.00E+00 | transcription_start_site | - | 335829 | 335829 | -1141 | 10816 | AN1918 |
| 54   | CONTIG29 | 336301 | 337640 | 3.42 | 0.00E+00 | transcription_start_site | - | 335692 | 335692 | -1278 | 10817 | AN1918 |
| 54   | CONTIG29 | 336301 | 337640 | 3.42 | 0.00E+00 | transcription_start_site | - | 335218 | 335218 | -1752 | 10818 | AN1918 |
| 1387 | CONTIG29 | 334286 | 334720 | 1.64 | 5.88E-02 | transcription_start_site | - | 335218 | 335218 | 715   | 10818 | AN1918 |
| 1387 | CONTIG29 | 334286 | 334720 | 1.64 | 5.88E-02 | transcription_start_site | - | 335692 | 335692 | 1189  | 10817 | AN1918 |
| 1495 | CONTIG29 | 348527 | 348961 | 1.59 | 6.84E-02 | transcription_start_site | - | 345454 | 345454 | -3290 | 10836 | AN1921 |
| 1495 | CONTIG29 | 348527 | 348961 | 1.59 | 6.84E-02 | transcription_start_site | - | 345258 | 345258 | -3486 | 10837 | AN1921 |
| 1495 | CONTIG29 | 348527 | 348961 | 1.59 | 6.84E-02 | transcription_start_site | - | 344722 | 344722 | -4022 | 10838 | AN1921 |
| 1495 | CONTIG29 | 348527 | 348961 | 1.59 | 6.84E-02 | transcription_start_site | + | 347863 | 347863 | 881   | 10841 | AN1922 |
| 1495 | CONTIG29 | 348527 | 348961 | 1.59 | 6.84E-02 | transcription_start_site | + | 349026 | 349026 | -282  | 10842 | AN1923 |
| 1495 | CONTIG29 | 348527 | 348961 | 1.59 | 6.84E-02 | transcription_start_site | + | 349487 | 349487 | -743  | 10843 | AN1923 |
| 1495 | CONTIG29 | 348527 | 348961 | 1.59 | 6.84E-02 | transcription_start_site | + | 350789 | 350789 | -2045 | 10844 | AN1923 |
| 1839 | CONTIG29 | 350937 | 351738 | 1.44 | 1.08E-01 | transcription_start_site | + | 350789 | 350789 | 548   | 10844 | AN1923 |
| 259  | CONTIG29 | 355807 | 356166 | 2.83 | 8.69E-04 | transcription_start_site | - | 354300 | 354300 | -1686 | 10845 | AN1924 |
| 259  | CONTIG29 | 355807 | 356166 | 2.83 | 8.69E-04 | transcription_start_site | - | 354168 | 354168 | -1818 | 10846 | AN1924 |
| 259  | CONTIG29 | 355807 | 356166 | 2.83 | 8.69E-04 | transcription_start_site | - | 353939 | 353939 | -2047 | 10847 | AN1924 |
| 259  | CONTIG29 | 355807 | 356166 | 2.83 | 8.69E-04 | transcription_start_site | - | 356293 | 356293 | 306   | 10850 | AN1925 |
| 259  | CONTIG29 | 355807 | 356166 | 2.83 | 8.69E-04 | transcription_start_site | - | 356368 | 356368 | 381   | 10849 | AN1925 |
| 259  | CONTIG29 | 355807 | 356166 | 2.83 | 8.69E-04 | transcription_start_site | - | 356559 | 356559 | 572   | 10848 | AN1925 |
| 182  | CONTIG29 | 371030 | 371539 | 2.98 | 2.16E-04 | transcription_start_site | - | 366385 | 366385 | -4899 | 10860 | AN1928 |
| 182  | CONTIG29 | 371030 | 371539 | 2.98 | 2.16E-04 | transcription_start_site | + | 372426 | 372426 | -1141 | 10867 | AN1930 |
| 182  | CONTIG29 | 371030 | 371539 | 2.98 | 2.16E-04 | transcription_start_site | + | 372645 | 372645 | -1360 | 10868 | AN1930 |
| 182  | CONTIG29 | 371030 | 371539 | 2.98 | 2.16E-04 | transcription_start_site | + | 372758 | 372758 | -1473 | 10869 | AN1930 |
| 182  | CONTIG29 | 371030 | 371539 | 2.98 | 2.16E-04 | transcription_start_site | + | 372903 | 372903 | -1618 | 10870 | AN1930 |
| 182  | CONTIG29 | 371030 | 371539 | 2.98 | 2.16E-04 | transcription_start_site | + | 373324 | 373324 | -2039 | 10871 | AN1930 |
| 182  | CONTIG29 | 371030 | 371539 | 2.98 | 2.16E-04 | transcription_start_site | + | 373456 | 373456 | -2171 | 10872 | AN1930 |
| 979  | CONTIG29 | 378001 | 378295 | 1.93 | 2.12E-02 | transcription_start_site | - | 376414 | 376414 | -1734 | 10873 | AN1931 |
| 979  | CONTIG29 | 378001 | 378295 | 1.93 | 2.12E-02 | transcription_start_site | - | 376225 | 376225 | -1923 | 10874 | AN1931 |
| 979  | CONTIG29 | 378001 | 378295 | 1.93 | 2.12E-02 | transcription_start_site | - | 376000 | 376000 | -2148 | 10875 | AN1931 |
| 979  | CONTIG29 | 378001 | 378295 | 1.93 | 2.12E-02 | transcription_start_site | - | 375900 | 375900 | -2248 | 10876 | AN1931 |
| 979  | CONTIG29 | 378001 | 378295 | 1.93 | 2.12E-02 | transcription_start_site | - | 375743 | 375743 | -2405 | 10877 | AN1931 |
| 1046 | CONTIG29 | 374795 | 375144 | 1.88 | 1.44E-02 | transcription_start_site | - | 375743 | 375743 | 773   | 10877 | AN1931 |
| 1046 | CONTIG29 | 374795 | 375144 | 1.88 | 1.44E-02 | transcription_start_site | - | 375900 | 375900 | 930   | 10876 | AN1931 |
| 1046 | CONTIG29 | 374795 | 375144 | 1.88 | 1.44E-02 | transcription_start_site | - | 376000 | 376000 | 1030  | 10875 | AN1931 |
| 2093 | CONTIG29 | 382506 | 382933 | 1.34 | 1.44E-01 | transcription_start_site | - | 382667 | 382667 | -52   | 10878 | AN1932 |
| 2093 | CONTIG29 | 382506 | 382933 | 1.34 | 1.44E-01 | transcription_start_site | - | 382462 | 382462 | -257  | 10879 | AN1932 |
| 2093 | CONTIG29 | 382506 | 382933 | 1.34 | 1.44E-01 | transcription_start_site | + | 383942 | 383942 | -1222 | 10880 | AN1933 |
| 2093 | CONTIG29 | 382506 | 382933 | 1.34 | 1.44E-01 | transcription_start_site | + | 384238 | 384238 | -1518 | 10881 | AN1933 |
| 2093 | CONTIG29 | 382506 | 382933 | 1.34 | 1.44E-01 | transcription_start_site | + | 384676 | 384676 | -1956 | 10882 | AN1933 |
| 2093 | CONTIG29 | 382506 | 382933 | 1.34 | 1.44E-01 | transcription_start_site | + | 385635 | 385635 | -2915 | 10883 | AN1934 |
| 2093 | CONTIG29 | 382506 | 382933 | 1.34 | 1.44E-01 | transcription_start_site | + | 385822 | 385822 | -3102 | 10884 | AN1934 |
| 143  | CONTIG29 | 393305 | 393579 | 3.07 | 2.67E-04 | transcription_start_site | - | 389780 | 389780 | -3662 | 10885 | AN1935 |
| 143  | CONTIG29 | 393305 | 393579 | 3.07 | 2.67E-04 | transcription_start_site | - | 389429 | 389429 | -4013 | 10886 | AN1935 |
| 2094 | CONTIG29 | 388070 | 388409 | 1.34 | 1.44E-01 | transcription_start_site | + | 390254 | 390254 | -2014 | 10887 | AN1936 |
| 2094 | CONTIG29 | 388070 | 388409 | 1.34 | 1.44E-01 | transcription_start_site | + | 390394 | 390394 | -2154 | 10888 | AN1936 |
| 2094 | CONTIG29 | 388070 | 388409 | 1.34 | 1.44E-01 | transcription_start_site | + | 390610 | 390610 | -2370 | 10889 | AN1936 |
| 143  | CONTIG29 | 393305 | 393579 | 3.07 | 2.67E-04 | transcription_start_site | - | 393221 | 393221 | -221  | 10890 | AN1937 |
| 143  | CONTIG29 | 393305 | 393579 | 3.07 | 2.67E-04 | transcription_start_site | + | 398251 | 398251 | -4809 | 10891 | AN1938 |
| 143  | CONTIG29 | 393305 | 393579 | 3.07 | 2.67E-04 | transcription_start_site | + | 398358 | 398358 | -4916 | 10892 | AN1938 |
| 1840 | CONTIG29 | 401341 | 401620 | 1.44 | 1.08E-01 | transcription_start_site | + | 402075 | 402075 | -594  | 10894 | AN1939 |

|      |          |        |        |      |          |                          |   |        |        |       |       |        |
|------|----------|--------|--------|------|----------|--------------------------|---|--------|--------|-------|-------|--------|
| 1958 | CONTIG29 | 405696 | 406175 | 1.39 | 1.25E-01 | transcription_start_site | + | 406741 | 406741 | -805  | 10895 | AN1940 |
| 1958 | CONTIG29 | 405696 | 406175 | 1.39 | 1.25E-01 | transcription_start_site | + | 409080 | 409080 | -3144 | 10896 | AN1940 |
| 1164 | CONTIG29 | 430363 | 430632 | 1.79 | 3.70E-02 | transcription_start_site | - | 428466 | 428466 | -2031 | 10916 | AN1948 |
| 588  | CONTIG29 | 435677 | 436111 | 2.33 | 2.32E-03 | transcription_start_site | - | 432924 | 432924 | -2970 | 10919 | AN1949 |
| 588  | CONTIG29 | 435677 | 436111 | 2.33 | 2.32E-03 | transcription_start_site | - | 432261 | 432261 | -3633 | 10920 | AN1949 |
| 588  | CONTIG29 | 435677 | 436111 | 2.33 | 2.32E-03 | transcription_start_site | - | 431490 | 431490 | -4404 | 10921 | AN1949 |
| 588  | CONTIG29 | 435677 | 436111 | 2.33 | 2.32E-03 | transcription_start_site | - | 431162 | 431162 | -4732 | 10922 | AN1949 |
| 1164 | CONTIG29 | 430363 | 430632 | 1.79 | 3.70E-02 | transcription_start_site | - | 431162 | 431162 | 664   | 10922 | AN1949 |
| 1164 | CONTIG29 | 430363 | 430632 | 1.79 | 3.70E-02 | transcription_start_site | - | 431490 | 431490 | 992   | 10921 | AN1949 |
| 588  | CONTIG29 | 435677 | 436111 | 2.33 | 2.32E-03 | transcription_start_site | + | 436765 | 436765 | -871  | 10923 | AN1950 |
| 588  | CONTIG29 | 435677 | 436111 | 2.33 | 2.32E-03 | transcription_start_site | + | 437188 | 437188 | -1294 | 10924 | AN1950 |
| 588  | CONTIG29 | 435677 | 436111 | 2.33 | 2.32E-03 | transcription_start_site | + | 440095 | 440095 | -4201 | 10925 | AN1951 |
| 588  | CONTIG29 | 435677 | 436111 | 2.33 | 2.32E-03 | transcription_start_site | + | 440231 | 440231 | -4337 | 10926 | AN1951 |
| 588  | CONTIG29 | 435677 | 436111 | 2.33 | 2.32E-03 | transcription_start_site | + | 440417 | 440417 | -4523 | 10927 | AN1951 |
| 588  | CONTIG29 | 435677 | 436111 | 2.33 | 2.32E-03 | transcription_start_site | + | 440533 | 440533 | -4639 | 10928 | AN1951 |
| 416  | CONTIG29 | 443254 | 443753 | 2.58 | 1.80E-03 | transcription_start_site | + | 444024 | 444024 | -520  | 10929 | AN1952 |
| 1496 | CONTIG29 | 442129 | 442651 | 1.59 | 6.84E-02 | transcription_start_site | + | 444024 | 444024 | -1634 | 10929 | AN1952 |
| 873  | CONTIG29 | 461416 | 461765 | 2.03 | 1.57E-02 | transcription_start_site | - | 458600 | 458600 | -2990 | 10937 | AN1956 |
| 873  | CONTIG29 | 461416 | 461765 | 2.03 | 1.57E-02 | transcription_start_site | - | 458329 | 458329 | -3261 | 10938 | AN1956 |
| 873  | CONTIG29 | 461416 | 461765 | 2.03 | 1.57E-02 | transcription_start_site | + | 461058 | 461058 | 532   | 10942 | AN1957 |
| 873  | CONTIG29 | 461416 | 461765 | 2.03 | 1.57E-02 | transcription_start_site | + | 460621 | 460621 | 969   | 10941 | AN1957 |
| 18   | CONTIG29 | 464418 | 464903 | 3.62 | 0.00E+00 | transcription_start_site | + | 464432 | 464432 | 228   | 10944 | AN1958 |
| 18   | CONTIG29 | 464418 | 464903 | 3.62 | 0.00E+00 | transcription_start_site | + | 464152 | 464152 | 508   | 10943 | AN1958 |
| 873  | CONTIG29 | 461416 | 461765 | 2.03 | 1.57E-02 | transcription_start_site | + | 464152 | 464152 | -2561 | 10943 | AN1958 |
| 873  | CONTIG29 | 461416 | 461765 | 2.03 | 1.57E-02 | transcription_start_site | + | 464432 | 464432 | -2841 | 10944 | AN1958 |
| 18   | CONTIG29 | 464418 | 464903 | 3.62 | 0.00E+00 | transcription_start_site | + | 465956 | 465956 | -1295 | 10945 | AN1959 |
| 18   | CONTIG29 | 464418 | 464903 | 3.62 | 0.00E+00 | transcription_start_site | + | 466089 | 466089 | -1428 | 10946 | AN1959 |
| 18   | CONTIG29 | 464418 | 464903 | 3.62 | 0.00E+00 | transcription_start_site | + | 466198 | 466198 | -1537 | 10947 | AN1959 |
| 18   | CONTIG29 | 464418 | 464903 | 3.62 | 0.00E+00 | transcription_start_site | + | 466419 | 466419 | -1758 | 10948 | AN1959 |
| 18   | CONTIG29 | 464418 | 464903 | 3.62 | 0.00E+00 | transcription_start_site | + | 466578 | 466578 | -1917 | 10949 | AN1959 |
| 18   | CONTIG29 | 464418 | 464903 | 3.62 | 0.00E+00 | transcription_start_site | + | 466710 | 466710 | -2049 | 10950 | AN1959 |
| 18   | CONTIG29 | 464418 | 464903 | 3.62 | 0.00E+00 | transcription_start_site | + | 466843 | 466843 | -2182 | 10951 | AN1959 |
| 18   | CONTIG29 | 464418 | 464903 | 3.62 | 0.00E+00 | transcription_start_site | + | 467009 | 467009 | -2348 | 10952 | AN1959 |
| 18   | CONTIG29 | 464418 | 464903 | 3.62 | 0.00E+00 | transcription_start_site | + | 467449 | 467449 | -2788 | 10953 | AN1959 |
| 18   | CONTIG29 | 464418 | 464903 | 3.62 | 0.00E+00 | transcription_start_site | + | 467636 | 467636 | -2975 | 10954 | AN1959 |
| 144  | CONTIG29 | 465542 | 465816 | 3.07 | 2.67E-04 | transcription_start_site | + | 465956 | 465956 | -277  | 10945 | AN1959 |
| 144  | CONTIG29 | 465542 | 465816 | 3.07 | 2.67E-04 | transcription_start_site | + | 466089 | 466089 | -410  | 10946 | AN1959 |
| 144  | CONTIG29 | 465542 | 465816 | 3.07 | 2.67E-04 | transcription_start_site | + | 466198 | 466198 | -519  | 10947 | AN1959 |
| 144  | CONTIG29 | 465542 | 465816 | 3.07 | 2.67E-04 | transcription_start_site | + | 466419 | 466419 | -740  | 10948 | AN1959 |
| 144  | CONTIG29 | 465542 | 465816 | 3.07 | 2.67E-04 | transcription_start_site | + | 466578 | 466578 | -899  | 10949 | AN1959 |
| 144  | CONTIG29 | 465542 | 465816 | 3.07 | 2.67E-04 | transcription_start_site | + | 466710 | 466710 | -1031 | 10950 | AN1959 |
| 144  | CONTIG29 | 465542 | 465816 | 3.07 | 2.67E-04 | transcription_start_site | + | 466843 | 466843 | -1164 | 10951 | AN1959 |
| 144  | CONTIG29 | 465542 | 465816 | 3.07 | 2.67E-04 | transcription_start_site | + | 467009 | 467009 | -1330 | 10952 | AN1959 |
| 144  | CONTIG29 | 465542 | 465816 | 3.07 | 2.67E-04 | transcription_start_site | + | 467449 | 467449 | -1770 | 10953 | AN1959 |
| 144  | CONTIG29 | 465542 | 465816 | 3.07 | 2.67E-04 | transcription_start_site | + | 467636 | 467636 | -1957 | 10954 | AN1959 |
| 873  | CONTIG29 | 461416 | 461765 | 2.03 | 1.57E-02 | transcription_start_site | + | 465956 | 465956 | -4365 | 10945 | AN1959 |
| 873  | CONTIG29 | 461416 | 461765 | 2.03 | 1.57E-02 | transcription_start_site | + | 466089 | 466089 | -4498 | 10946 | AN1959 |
| 873  | CONTIG29 | 461416 | 461765 | 2.03 | 1.57E-02 | transcription_start_site | + | 466198 | 466198 | -4607 | 10947 | AN1959 |
| 873  | CONTIG29 | 461416 | 461765 | 2.03 | 1.57E-02 | transcription_start_site | + | 466419 | 466419 | -4828 | 10948 | AN1959 |
| 873  | CONTIG29 | 461416 | 461765 | 2.03 | 1.57E-02 | transcription_start_site | + | 466578 | 466578 | -4987 | 10949 | AN1959 |
| 873  | CONTIG29 | 461416 | 461765 | 2.03 | 1.57E-02 | transcription_start_site | + | 466710 | 466710 | -5119 | 10950 | AN1959 |
| 18   | CONTIG29 | 464418 | 464903 | 3.62 | 0.00E+00 | transcription_start_site | + | 468518 | 468518 | -3857 | 10955 | AN1960 |
| 18   | CONTIG29 | 464418 | 464903 | 3.62 | 0.00E+00 | transcription_start_site | + | 468702 | 468702 | -4041 | 10956 | AN1960 |
| 144  | CONTIG29 | 465542 | 465816 | 3.07 | 2.67E-04 | transcription_start_site | + | 468518 | 468518 | -2839 | 10955 | AN1960 |
| 144  | CONTIG29 | 465542 | 465816 | 3.07 | 2.67E-04 | transcription_start_site | + | 468702 | 468702 | -3023 | 10956 | AN1960 |
| 1003 | CONTIG30 | 14868  | 15355  | 1.91 | 1.57E-02 | transcription_start_site | - | 13758  | 13758  | -1353 | 11033 | AN1983 |
| 1003 | CONTIG30 | 14868  | 15355  | 1.91 | 1.57E-02 | transcription_start_site | - | 13153  | 13153  | -1958 | 11034 | AN1983 |

|      |          |       |       |      |          |                          |   |       |       |       |       |        |
|------|----------|-------|-------|------|----------|--------------------------|---|-------|-------|-------|-------|--------|
| 1003 | CONTIG30 | 14868 | 15355 | 1.91 | 1.57E-02 | transcription_start_site | + | 15866 | 15866 | -754  | 11035 | AN1984 |
| 1003 | CONTIG30 | 14868 | 15355 | 1.91 | 1.57E-02 | transcription_start_site | + | 16031 | 16031 | -919  | 11036 | AN1984 |
| 1003 | CONTIG30 | 14868 | 15355 | 1.91 | 1.57E-02 | transcription_start_site | + | 18078 | 18078 | -2966 | 11037 | AN1984 |
| 1502 | CONTIG30 | 48152 | 49336 | 1.58 | 2.48E-02 | transcription_start_site | - | 47912 | 47912 | -832  | 11058 | AN1994 |
| 1502 | CONTIG30 | 48152 | 49336 | 1.58 | 2.48E-02 | transcription_start_site | - | 47728 | 47728 | -1016 | 11059 | AN1994 |
| 1502 | CONTIG30 | 48152 | 49336 | 1.58 | 2.48E-02 | transcription_start_site | - | 47485 | 47485 | -1259 | 11060 | AN1994 |
| 1502 | CONTIG30 | 48152 | 49336 | 1.58 | 2.48E-02 | transcription_start_site | - | 46892 | 46892 | -1852 | 11061 | AN1994 |
| 1502 | CONTIG30 | 48152 | 49336 | 1.58 | 2.48E-02 | transcription_start_site | + | 48824 | 48824 | -80   | 11062 | AN1995 |
| 1502 | CONTIG30 | 48152 | 49336 | 1.58 | 2.48E-02 | transcription_start_site | + | 49029 | 49029 | -285  | 11063 | AN1995 |
| 1502 | CONTIG30 | 48152 | 49336 | 1.58 | 2.48E-02 | transcription_start_site | + | 49283 | 49283 | -539  | 11064 | AN1995 |
| 1502 | CONTIG30 | 48152 | 49336 | 1.58 | 2.48E-02 | transcription_start_site | + | 52680 | 52680 | -3936 | 11065 | AN1996 |
| 1502 | CONTIG30 | 48152 | 49336 | 1.58 | 2.48E-02 | transcription_start_site | + | 52805 | 52805 | -4061 | 11066 | AN1996 |
| 205  | CONTIG30 | 60076 | 60378 | 2.93 | 0.00E+00 | transcription_start_site | - | 57449 | 57449 | -2778 | 11069 | AN1997 |
| 205  | CONTIG30 | 60076 | 60378 | 2.93 | 0.00E+00 | transcription_start_site | - | 57028 | 57028 | -3199 | 11070 | AN1997 |
| 205  | CONTIG30 | 60076 | 60378 | 2.93 | 0.00E+00 | transcription_start_site | - | 56829 | 56829 | -3398 | 11071 | AN1997 |
| 2199 | CONTIG30 | 65707 | 65991 | 1.3  | 1.25E-01 | transcription_start_site | - | 63223 | 63223 | -2626 | 11072 | AN1998 |
| 2199 | CONTIG30 | 65707 | 65991 | 1.3  | 1.25E-01 | transcription_start_site | - | 63144 | 63144 | -2705 | 11073 | AN1998 |
| 2341 | CONTIG30 | 64146 | 64415 | 1.26 | 1.44E-01 | transcription_start_site | - | 63223 | 63223 | -1057 | 11072 | AN1998 |
| 2341 | CONTIG30 | 64146 | 64415 | 1.26 | 1.44E-01 | transcription_start_site | - | 63144 | 63144 | -1136 | 11073 | AN1998 |
| 205  | CONTIG30 | 60076 | 60378 | 2.93 | 0.00E+00 | transcription_start_site | + | 64170 | 64170 | -3943 | 11074 | AN1999 |
| 2341 | CONTIG30 | 64146 | 64415 | 1.26 | 1.44E-01 | transcription_start_site | + | 64170 | 64170 | 110   | 11074 | AN1999 |
| 128  | CONTIG30 | 73811 | 74380 | 3.12 | 0.00E+00 | transcription_start_site | - | 69040 | 69040 | -5055 | 11075 | AN2000 |
| 128  | CONTIG30 | 73811 | 74380 | 3.12 | 0.00E+00 | transcription_start_site | - | 68957 | 68957 | -5138 | 11076 | AN2000 |
| 708  | CONTIG30 | 69387 | 69651 | 2.19 | 5.20E-03 | transcription_start_site | - | 69040 | 69040 | -479  | 11075 | AN2000 |
| 708  | CONTIG30 | 69387 | 69651 | 2.19 | 5.20E-03 | transcription_start_site | - | 68957 | 68957 | -562  | 11076 | AN2000 |
| 708  | CONTIG30 | 69387 | 69651 | 2.19 | 5.20E-03 | transcription_start_site | - | 68683 | 68683 | -836  | 11077 | AN2000 |
| 128  | CONTIG30 | 73811 | 74380 | 3.12 | 0.00E+00 | transcription_start_site | - | 73418 | 73418 | -677  | 11078 | AN2001 |
| 128  | CONTIG30 | 73811 | 74380 | 3.12 | 0.00E+00 | transcription_start_site | - | 72263 | 72263 | -1832 | 11079 | AN2001 |
| 128  | CONTIG30 | 73811 | 74380 | 3.12 | 0.00E+00 | transcription_start_site | - | 71958 | 71958 | -2137 | 11080 | AN2001 |
| 128  | CONTIG30 | 73811 | 74380 | 3.12 | 0.00E+00 | transcription_start_site | - | 71360 | 71360 | -2735 | 11081 | AN2001 |
| 128  | CONTIG30 | 73811 | 74380 | 3.12 | 0.00E+00 | transcription_start_site | - | 71113 | 71113 | -2982 | 11082 | AN2001 |
| 128  | CONTIG30 | 73811 | 74380 | 3.12 | 0.00E+00 | transcription_start_site | + | 76396 | 76396 | -2300 | 11083 | AN2002 |
| 128  | CONTIG30 | 73811 | 74380 | 3.12 | 0.00E+00 | transcription_start_site | + | 77034 | 77034 | -2938 | 11084 | AN2002 |
| 128  | CONTIG30 | 73811 | 74380 | 3.12 | 0.00E+00 | transcription_start_site | + | 77236 | 77236 | -3140 | 11085 | AN2002 |
| 128  | CONTIG30 | 73811 | 74380 | 3.12 | 0.00E+00 | transcription_start_site | + | 77364 | 77364 | -3268 | 11086 | AN2002 |
| 128  | CONTIG30 | 73811 | 74380 | 3.12 | 0.00E+00 | transcription_start_site | + | 77538 | 77538 | -3442 | 11087 | AN2002 |
| 128  | CONTIG30 | 73811 | 74380 | 3.12 | 0.00E+00 | transcription_start_site | + | 77707 | 77707 | -3611 | 11088 | AN2002 |
| 128  | CONTIG30 | 73811 | 74380 | 3.12 | 0.00E+00 | transcription_start_site | + | 78033 | 78033 | -3937 | 11089 | AN2002 |
| 396  | CONTIG30 | 89253 | 89762 | 2.61 | 9.51E-04 | transcription_start_site | - | 86144 | 86144 | -3363 | 11090 | AN2004 |
| 396  | CONTIG30 | 89253 | 89762 | 2.61 | 9.51E-04 | transcription_start_site | - | 85982 | 85982 | -3525 | 11091 | AN2004 |
| 396  | CONTIG30 | 89253 | 89762 | 2.61 | 9.51E-04 | transcription_start_site | - | 85397 | 85397 | -4110 | 11092 | AN2004 |
| 396  | CONTIG30 | 89253 | 89762 | 2.61 | 9.51E-04 | transcription_start_site | - | 88569 | 88569 | -938  | 11093 | AN2005 |
| 396  | CONTIG30 | 89253 | 89762 | 2.61 | 9.51E-04 | transcription_start_site | - | 88466 | 88466 | -1041 | 11094 | AN2005 |
| 396  | CONTIG30 | 89253 | 89762 | 2.61 | 9.51E-04 | transcription_start_site | - | 88250 | 88250 | -1257 | 11095 | AN2005 |
| 265  | CONTIG32 | 7880  | 8229  | 2.81 | 6.10E-04 | transcription_start_site | - | 6198  | 6198  | -1856 | 11104 | AN2009 |
| 265  | CONTIG32 | 7880  | 8229  | 2.81 | 6.10E-04 | transcription_start_site | - | 5810  | 5810  | -2244 | 11105 | AN2009 |
| 265  | CONTIG32 | 7880  | 8229  | 2.81 | 6.10E-04 | transcription_start_site | - | 5550  | 5550  | -2504 | 11106 | AN2009 |
| 1128 | CONTIG32 | 18611 | 18889 | 1.81 | 2.62E-02 | transcription_start_site | - | 18136 | 18136 | -614  | 11109 | AN2011 |
| 2270 | CONTIG32 | 22296 | 22720 | 1.28 | 1.44E-01 | transcription_start_site | - | 18136 | 18136 | -4372 | 11109 | AN2011 |
| 2270 | CONTIG32 | 22296 | 22720 | 1.28 | 1.44E-01 | transcription_start_site | - | 22337 | 22337 | -171  | 11113 | AN2012 |
| 2270 | CONTIG32 | 22296 | 22720 | 1.28 | 1.44E-01 | transcription_start_site | - | 23061 | 23061 | 553   | 11112 | AN2012 |
| 2270 | CONTIG32 | 22296 | 22720 | 1.28 | 1.44E-01 | transcription_start_site | - | 23294 | 23294 | 786   | 11111 | AN2012 |
| 2270 | CONTIG32 | 22296 | 22720 | 1.28 | 1.44E-01 | transcription_start_site | - | 23476 | 23476 | 968   | 11110 | AN2012 |
| 2270 | CONTIG32 | 22296 | 22720 | 1.28 | 1.44E-01 | transcription_start_site | - | 21400 | 21400 | -1108 | 11114 | AN2012 |
| 2270 | CONTIG32 | 22296 | 22720 | 1.28 | 1.44E-01 | transcription_start_site | + | 24455 | 24455 | -1947 | 11115 | AN2013 |
| 304  | CONTIG32 | 29268 | 29527 | 2.76 | 5.64E-04 | transcription_start_site | - | 27940 | 27940 | -1457 | 11116 | AN2014 |
| 304  | CONTIG32 | 29268 | 29527 | 2.76 | 5.64E-04 | transcription_start_site | - | 27561 | 27561 | -1836 | 11117 | AN2014 |

|      |          |        |        |      |          |                          |   |        |        |       |       |        |
|------|----------|--------|--------|------|----------|--------------------------|---|--------|--------|-------|-------|--------|
| 304  | CONTIG32 | 29268  | 29527  | 2.76 | 5.64E-04 | transcription_start_site | - | 27234  | 27234  | -2163 | 11118 | AN2014 |
| 304  | CONTIG32 | 29268  | 29527  | 2.76 | 5.64E-04 | transcription_start_site | - | 27040  | 27040  | -2357 | 11119 | AN2014 |
| 1862 | CONTIG32 | 29569  | 30353  | 1.43 | 7.51E-02 | transcription_start_site | - | 27940  | 27940  | -2021 | 11116 | AN2014 |
| 1862 | CONTIG32 | 29569  | 30353  | 1.43 | 7.51E-02 | transcription_start_site | - | 27561  | 27561  | -2400 | 11117 | AN2014 |
| 1862 | CONTIG32 | 29569  | 30353  | 1.43 | 7.51E-02 | transcription_start_site | - | 27234  | 27234  | -2727 | 11118 | AN2014 |
| 1862 | CONTIG32 | 29569  | 30353  | 1.43 | 7.51E-02 | transcription_start_site | - | 27040  | 27040  | -2921 | 11119 | AN2014 |
| 304  | CONTIG32 | 29268  | 29527  | 2.76 | 5.64E-04 | transcription_start_site | + | 29761  | 29761  | -363  | 11120 | AN2015 |
| 1862 | CONTIG32 | 29569  | 30353  | 1.43 | 7.51E-02 | transcription_start_site | + | 29761  | 29761  | 200   | 11120 | AN2015 |
| 450  | CONTIG32 | 34669  | 35476  | 2.52 | 0.00E+00 | transcription_start_site | - | 34223  | 34223  | -849  | 11121 | AN2016 |
| 450  | CONTIG32 | 34669  | 35476  | 2.52 | 0.00E+00 | transcription_start_site | - | 33202  | 33202  | -1870 | 11122 | AN2016 |
| 450  | CONTIG32 | 34669  | 35476  | 2.52 | 0.00E+00 | transcription_start_site | - | 32674  | 32674  | -2398 | 11123 | AN2016 |
| 1530 | CONTIG32 | 33694  | 33963  | 1.57 | 5.88E-02 | transcription_start_site | - | 34223  | 34223  | 394   | 11121 | AN2016 |
| 1530 | CONTIG32 | 33694  | 33963  | 1.57 | 5.88E-02 | transcription_start_site | - | 33202  | 33202  | -626  | 11122 | AN2016 |
| 1530 | CONTIG32 | 33694  | 33963  | 1.57 | 5.88E-02 | transcription_start_site | - | 32674  | 32674  | -1154 | 11123 | AN2016 |
| 450  | CONTIG32 | 34669  | 35476  | 2.52 | 0.00E+00 | transcription_start_site | + | 35862  | 35862  | -789  | 11124 | AN2017 |
| 450  | CONTIG32 | 34669  | 35476  | 2.52 | 0.00E+00 | transcription_start_site | + | 36636  | 36636  | -1563 | 11125 | AN2017 |
| 450  | CONTIG32 | 34669  | 35476  | 2.52 | 0.00E+00 | transcription_start_site | + | 37090  | 37090  | -2017 | 11126 | AN2017 |
| 450  | CONTIG32 | 34669  | 35476  | 2.52 | 0.00E+00 | transcription_start_site | + | 37305  | 37305  | -2232 | 11127 | AN2017 |
| 1530 | CONTIG32 | 33694  | 33963  | 1.57 | 5.88E-02 | transcription_start_site | + | 35862  | 35862  | -2033 | 11124 | AN2017 |
| 1530 | CONTIG32 | 33694  | 33963  | 1.57 | 5.88E-02 | transcription_start_site | + | 36636  | 36636  | -2807 | 11125 | AN2017 |
| 1530 | CONTIG32 | 33694  | 33963  | 1.57 | 5.88E-02 | transcription_start_site | + | 37090  | 37090  | -3261 | 11126 | AN2017 |
| 1530 | CONTIG32 | 33694  | 33963  | 1.57 | 5.88E-02 | transcription_start_site | + | 37305  | 37305  | -3476 | 11127 | AN2017 |
| 450  | CONTIG32 | 34669  | 35476  | 2.52 | 0.00E+00 | transcription_start_site | + | 39330  | 39330  | -4257 | 11128 | AN2018 |
| 450  | CONTIG32 | 34669  | 35476  | 2.52 | 0.00E+00 | transcription_start_site | + | 39534  | 39534  | -4461 | 11129 | AN2018 |
| 450  | CONTIG32 | 34669  | 35476  | 2.52 | 0.00E+00 | transcription_start_site | + | 39733  | 39733  | -4660 | 11130 | AN2018 |
| 450  | CONTIG32 | 34669  | 35476  | 2.52 | 0.00E+00 | transcription_start_site | + | 39902  | 39902  | -4829 | 11131 | AN2018 |
| 450  | CONTIG32 | 34669  | 35476  | 2.52 | 0.00E+00 | transcription_start_site | + | 40202  | 40202  | -5129 | 11132 | AN2018 |
| 450  | CONTIG32 | 34669  | 35476  | 2.52 | 0.00E+00 | transcription_start_site | + | 40417  | 40417  | -5344 | 11133 | AN2018 |
| 16   | CONTIG32 | 52431  | 53020  | 3.66 | 0.00E+00 | transcription_start_site | - | 48894  | 48894  | -3831 | 11138 | AN2020 |
| 16   | CONTIG32 | 52431  | 53020  | 3.66 | 0.00E+00 | transcription_start_site | - | 48672  | 48672  | -4053 | 11139 | AN2020 |
| 16   | CONTIG32 | 52431  | 53020  | 3.66 | 0.00E+00 | transcription_start_site | - | 47991  | 47991  | -4734 | 11140 | AN2020 |
| 49   | CONTIG32 | 47032  | 47381  | 3.43 | 0.00E+00 | transcription_start_site | - | 47991  | 47991  | 784   | 11140 | AN2020 |
| 584  | CONTIG32 | 49202  | 49701  | 2.33 | 0.00E+00 | transcription_start_site | - | 48894  | 48894  | -557  | 11138 | AN2020 |
| 584  | CONTIG32 | 49202  | 49701  | 2.33 | 0.00E+00 | transcription_start_site | - | 48672  | 48672  | -779  | 11139 | AN2020 |
| 584  | CONTIG32 | 49202  | 49701  | 2.33 | 0.00E+00 | transcription_start_site | - | 47991  | 47991  | -1460 | 11140 | AN2020 |
| 510  | CONTIG32 | 122258 | 122602 | 2.43 | 2.22E-03 | transcription_start_site | - | 120334 | 120334 | -2096 | 11173 | AN2036 |
| 510  | CONTIG32 | 122258 | 122602 | 2.43 | 2.22E-03 | transcription_start_site | - | 120234 | 120234 | -2196 | 11174 | AN2036 |
| 510  | CONTIG32 | 122258 | 122602 | 2.43 | 2.22E-03 | transcription_start_site | - | 119733 | 119733 | -2697 | 11175 | AN2036 |
| 510  | CONTIG32 | 122258 | 122602 | 2.43 | 2.22E-03 | transcription_start_site | - | 119139 | 119139 | -3291 | 11176 | AN2036 |
| 510  | CONTIG32 | 122258 | 122602 | 2.43 | 2.22E-03 | transcription_start_site | - | 118596 | 118596 | -3834 | 11177 | AN2036 |
| 510  | CONTIG32 | 122258 | 122602 | 2.43 | 2.22E-03 | transcription_start_site | - | 123590 | 123590 | 1160  | 11179 | AN2037 |
| 653  | CONTIG32 | 139584 | 139862 | 2.24 | 5.20E-03 | transcription_start_site | - | 139171 | 139171 | -552  | 11193 | AN2042 |
| 653  | CONTIG32 | 139584 | 139862 | 2.24 | 5.20E-03 | transcription_start_site | - | 139119 | 139119 | -604  | 11194 | AN2042 |
| 653  | CONTIG32 | 139584 | 139862 | 2.24 | 5.20E-03 | transcription_start_site | - | 137149 | 137149 | -2574 | 11195 | AN2042 |
| 758  | CONTIG32 | 168685 | 169334 | 2.14 | 3.31E-03 | transcription_start_site | - | 167911 | 167911 | -1098 | 11239 | AN2054 |
| 758  | CONTIG32 | 168685 | 169334 | 2.14 | 3.31E-03 | transcription_start_site | - | 166672 | 166672 | -2337 | 11240 | AN2054 |
| 758  | CONTIG32 | 168685 | 169334 | 2.14 | 3.31E-03 | transcription_start_site | - | 166319 | 166319 | -2690 | 11241 | AN2054 |
| 758  | CONTIG32 | 168685 | 169334 | 2.14 | 3.31E-03 | transcription_start_site | + | 169638 | 169638 | -628  | 11242 | AN2055 |
| 758  | CONTIG32 | 168685 | 169334 | 2.14 | 3.31E-03 | transcription_start_site | + | 170030 | 170030 | -1020 | 11243 | AN2055 |
| 758  | CONTIG32 | 168685 | 169334 | 2.14 | 3.31E-03 | transcription_start_site | + | 172164 | 172164 | -3154 | 11244 | AN2056 |
| 758  | CONTIG32 | 168685 | 169334 | 2.14 | 3.31E-03 | transcription_start_site | + | 172308 | 172308 | -3298 | 11245 | AN2056 |
| 758  | CONTIG32 | 168685 | 169334 | 2.14 | 3.31E-03 | transcription_start_site | + | 173229 | 173229 | -4219 | 11246 | AN2056 |
| 1985 | CONTIG32 | 173870 | 174373 | 1.38 | 1.08E-01 | transcription_start_site | + | 173229 | 173229 | 892   | 11246 | AN2056 |
| 758  | CONTIG32 | 168685 | 169334 | 2.14 | 3.31E-03 | transcription_start_site | + | 174046 | 174046 | -5036 | 11247 | AN2057 |
| 1985 | CONTIG32 | 173870 | 174373 | 1.38 | 1.08E-01 | transcription_start_site | + | 174046 | 174046 | 75    | 11247 | AN2057 |
| 1985 | CONTIG32 | 173870 | 174373 | 1.38 | 1.08E-01 | transcription_start_site | + | 174394 | 174394 | -272  | 11248 | AN2057 |
| 1985 | CONTIG32 | 173870 | 174373 | 1.38 | 1.08E-01 | transcription_start_site | + | 175798 | 175798 | -1676 | 11249 | AN2058 |

|      |          |        |        |      |          |                          |   |        |        |       |       |        |
|------|----------|--------|--------|------|----------|--------------------------|---|--------|--------|-------|-------|--------|
| 1985 | CONTIG32 | 173870 | 174373 | 1.38 | 1.08E-01 | transcription_start_site | + | 176398 | 176398 | -2276 | 11250 | AN2058 |
| 484  | CONTIG32 | 209046 | 210430 | 2.47 | 1.80E-03 | transcription_start_site | - | 205135 | 205135 | -4603 | 11276 | AN2066 |
| 484  | CONTIG32 | 209046 | 210430 | 2.47 | 1.80E-03 | transcription_start_site | - | 205013 | 205013 | -4725 | 11277 | AN2066 |
| 484  | CONTIG32 | 209046 | 210430 | 2.47 | 1.80E-03 | transcription_start_site | - | 204877 | 204877 | -4861 | 11278 | AN2066 |
| 484  | CONTIG32 | 209046 | 210430 | 2.47 | 1.80E-03 | transcription_start_site | - | 204771 | 204771 | -4967 | 11279 | AN2066 |
| 484  | CONTIG32 | 209046 | 210430 | 2.47 | 1.80E-03 | transcription_start_site | - | 204646 | 204646 | -5092 | 11280 | AN2066 |
| 484  | CONTIG32 | 209046 | 210430 | 2.47 | 1.80E-03 | transcription_start_site | - | 204495 | 204495 | -5243 | 11281 | AN2066 |
| 484  | CONTIG32 | 209046 | 210430 | 2.47 | 1.80E-03 | transcription_start_site | - | 204323 | 204323 | -5415 | 11282 | AN2066 |
| 1531 | CONTIG32 | 207766 | 208035 | 1.57 | 5.88E-02 | transcription_start_site | - | 205135 | 205135 | -2765 | 11276 | AN2066 |
| 1531 | CONTIG32 | 207766 | 208035 | 1.57 | 5.88E-02 | transcription_start_site | - | 205013 | 205013 | -2887 | 11277 | AN2066 |
| 1531 | CONTIG32 | 207766 | 208035 | 1.57 | 5.88E-02 | transcription_start_site | - | 204877 | 204877 | -3023 | 11278 | AN2066 |
| 1531 | CONTIG32 | 207766 | 208035 | 1.57 | 5.88E-02 | transcription_start_site | - | 204771 | 204771 | -3129 | 11279 | AN2066 |
| 1531 | CONTIG32 | 207766 | 208035 | 1.57 | 5.88E-02 | transcription_start_site | - | 204646 | 204646 | -3254 | 11280 | AN2066 |
| 1531 | CONTIG32 | 207766 | 208035 | 1.57 | 5.88E-02 | transcription_start_site | - | 204495 | 204495 | -3405 | 11281 | AN2066 |
| 1531 | CONTIG32 | 207766 | 208035 | 1.57 | 5.88E-02 | transcription_start_site | - | 204323 | 204323 | -3577 | 11282 | AN2066 |
| 1531 | CONTIG32 | 207766 | 208035 | 1.57 | 5.88E-02 | transcription_start_site | - | 203655 | 203655 | -4245 | 11283 | AN2066 |
| 1531 | CONTIG32 | 207766 | 208035 | 1.57 | 5.88E-02 | transcription_start_site | - | 203394 | 203394 | -4506 | 11284 | AN2066 |
| 484  | CONTIG32 | 209046 | 210430 | 2.47 | 1.80E-03 | transcription_start_site | - | 209022 | 209022 | -716  | 11285 | AN2067 |
| 484  | CONTIG32 | 209046 | 210430 | 2.47 | 1.80E-03 | transcription_start_site | - | 206964 | 206964 | -2774 | 11286 | AN2067 |
| 484  | CONTIG32 | 209046 | 210430 | 2.47 | 1.80E-03 | transcription_start_site | - | 206812 | 206812 | -2926 | 11287 | AN2067 |
| 484  | CONTIG32 | 209046 | 210430 | 2.47 | 1.80E-03 | transcription_start_site | - | 206429 | 206429 | -3309 | 11288 | AN2067 |
| 1531 | CONTIG32 | 207766 | 208035 | 1.57 | 5.88E-02 | transcription_start_site | - | 206964 | 206964 | -936  | 11286 | AN2067 |
| 1531 | CONTIG32 | 207766 | 208035 | 1.57 | 5.88E-02 | transcription_start_site | - | 206812 | 206812 | -1088 | 11287 | AN2067 |
| 1531 | CONTIG32 | 207766 | 208035 | 1.57 | 5.88E-02 | transcription_start_site | - | 209022 | 209022 | 1121  | 11285 | AN2067 |
| 1531 | CONTIG32 | 207766 | 208035 | 1.57 | 5.88E-02 | transcription_start_site | - | 206429 | 206429 | -1471 | 11288 | AN2067 |
| 484  | CONTIG32 | 209046 | 210430 | 2.47 | 1.80E-03 | transcription_start_site | + | 212683 | 212683 | -2945 | 11289 | AN2068 |
| 484  | CONTIG32 | 209046 | 210430 | 2.47 | 1.80E-03 | transcription_start_site | + | 213135 | 213135 | -3397 | 11290 | AN2068 |
| 484  | CONTIG32 | 209046 | 210430 | 2.47 | 1.80E-03 | transcription_start_site | + | 213439 | 213439 | -3701 | 11291 | AN2068 |
| 1531 | CONTIG32 | 207766 | 208035 | 1.57 | 5.88E-02 | transcription_start_site | + | 212683 | 212683 | -4782 | 11289 | AN2068 |
| 1651 | CONTIG32 | 221569 | 221833 | 1.52 | 6.84E-02 | transcription_start_site | - | 218475 | 218475 | -3226 | 11293 | AN2069 |
| 1651 | CONTIG32 | 221569 | 221833 | 1.52 | 6.84E-02 | transcription_start_site | - | 218282 | 218282 | -3419 | 11294 | AN2069 |
| 1651 | CONTIG32 | 221569 | 221833 | 1.52 | 6.84E-02 | transcription_start_site | - | 218097 | 218097 | -3604 | 11295 | AN2069 |
| 2385 | CONTIG32 | 220579 | 221078 | 1.24 | 1.50E-01 | transcription_start_site | - | 218475 | 218475 | -2353 | 11293 | AN2069 |
| 2385 | CONTIG32 | 220579 | 221078 | 1.24 | 1.50E-01 | transcription_start_site | - | 218282 | 218282 | -2546 | 11294 | AN2069 |
| 2385 | CONTIG32 | 220579 | 221078 | 1.24 | 1.50E-01 | transcription_start_site | - | 218097 | 218097 | -2731 | 11295 | AN2069 |
| 1651 | CONTIG32 | 221569 | 221833 | 1.52 | 6.84E-02 | transcription_start_site | - | 221907 | 221907 | 206   | 11296 | AN2070 |
| 2385 | CONTIG32 | 220579 | 221078 | 1.24 | 1.50E-01 | transcription_start_site | - | 221907 | 221907 | 1078  | 11296 | AN2070 |
| 1431 | CONTIG32 | 229809 | 230319 | 1.62 | 5.22E-02 | transcription_start_site | - | 224881 | 224881 | -5183 | 11297 | AN2071 |
| 1651 | CONTIG32 | 221569 | 221833 | 1.52 | 6.84E-02 | transcription_start_site | + | 225550 | 225550 | -3849 | 11301 | AN2072 |
| 1651 | CONTIG32 | 221569 | 221833 | 1.52 | 6.84E-02 | transcription_start_site | + | 226067 | 226067 | -4366 | 11302 | AN2072 |
| 2385 | CONTIG32 | 220579 | 221078 | 1.24 | 1.50E-01 | transcription_start_site | + | 225550 | 225550 | -4721 | 11301 | AN2072 |
| 2385 | CONTIG32 | 220579 | 221078 | 1.24 | 1.50E-01 | transcription_start_site | + | 226067 | 226067 | -5238 | 11302 | AN2072 |
| 1431 | CONTIG32 | 229809 | 230319 | 1.62 | 5.22E-02 | transcription_start_site | - | 231310 | 231310 | 1246  | 11305 | AN2073 |
| 2387 | CONTIG32 | 262894 | 263905 | 1.24 | 1.59E-01 | transcription_start_site | - | 258676 | 258676 | -4723 | 11325 | AN2080 |
| 2387 | CONTIG32 | 262894 | 263905 | 1.24 | 1.59E-01 | transcription_start_site | - | 263247 | 263247 | -152  | 11332 | AN2082 |
| 2387 | CONTIG32 | 262894 | 263905 | 1.24 | 1.59E-01 | transcription_start_site | - | 262168 | 262168 | -1231 | 11333 | AN2082 |
| 192  | CONTIG32 | 270096 | 270650 | 2.95 | 0.00E+00 | transcription_start_site | - | 265338 | 265338 | -5035 | 11334 | AN2083 |
| 305  | CONTIG32 | 269045 | 269320 | 2.76 | 5.64E-04 | transcription_start_site | - | 265338 | 265338 | -3844 | 11334 | AN2083 |
| 192  | CONTIG32 | 270096 | 270650 | 2.95 | 0.00E+00 | transcription_start_site | + | 272006 | 272006 | -1633 | 11335 | AN2084 |
| 192  | CONTIG32 | 270096 | 270650 | 2.95 | 0.00E+00 | transcription_start_site | + | 272724 | 272724 | -2351 | 11336 | AN2084 |
| 192  | CONTIG32 | 270096 | 270650 | 2.95 | 0.00E+00 | transcription_start_site | + | 273163 | 273163 | -2790 | 11337 | AN2084 |
| 305  | CONTIG32 | 269045 | 269320 | 2.76 | 5.64E-04 | transcription_start_site | + | 272006 | 272006 | -2823 | 11335 | AN2084 |
| 305  | CONTIG32 | 269045 | 269320 | 2.76 | 5.64E-04 | transcription_start_site | + | 272724 | 272724 | -3541 | 11336 | AN2084 |
| 305  | CONTIG32 | 269045 | 269320 | 2.76 | 5.64E-04 | transcription_start_site | + | 273163 | 273163 | -3980 | 11337 | AN2084 |
| 1522 | CONTIG32 | 312769 | 313188 | 1.57 | 3.99E-02 | transcription_start_site | - | 311288 | 311288 | -1690 | 11374 | AN2096 |
| 1522 | CONTIG32 | 312769 | 313188 | 1.57 | 3.99E-02 | transcription_start_site | - | 310974 | 310974 | -2004 | 11375 | AN2096 |
| 1522 | CONTIG32 | 312769 | 313188 | 1.57 | 3.99E-02 | transcription_start_site | - | 310846 | 310846 | -2132 | 11376 | AN2096 |



|      |          |        |        |      |          |                          |   |        |        |       |       |        |
|------|----------|--------|--------|------|----------|--------------------------|---|--------|--------|-------|-------|--------|
| 1522 | CONTIG32 | 312769 | 313188 | 1.57 | 3.99E-02 | transcription_start_site | - | 309129 | 309129 | -3849 | 11377 | AN2096 |
| 1522 | CONTIG32 | 312769 | 313188 | 1.57 | 3.99E-02 | transcription_start_site | - | 308990 | 308990 | -3988 | 11378 | AN2096 |
| 1986 | CONTIG32 | 314564 | 314851 | 1.38 | 1.08E-01 | transcription_start_site | - | 311288 | 311288 | -3419 | 11374 | AN2096 |
| 1986 | CONTIG32 | 314564 | 314851 | 1.38 | 1.08E-01 | transcription_start_site | - | 310974 | 310974 | -3733 | 11375 | AN2096 |
| 1986 | CONTIG32 | 314564 | 314851 | 1.38 | 1.08E-01 | transcription_start_site | - | 310846 | 310846 | -3861 | 11376 | AN2096 |
| 1522 | CONTIG32 | 312769 | 313188 | 1.57 | 3.99E-02 | transcription_start_site | - | 313229 | 313229 | 250   | 11380 | AN2097 |
| 1522 | CONTIG32 | 312769 | 313188 | 1.57 | 3.99E-02 | transcription_start_site | - | 312613 | 312613 | -365  | 11381 | AN2097 |
| 1522 | CONTIG32 | 312769 | 313188 | 1.57 | 3.99E-02 | transcription_start_site | - | 313425 | 313425 | 446   | 11379 | AN2097 |
| 1522 | CONTIG32 | 312769 | 313188 | 1.57 | 3.99E-02 | transcription_start_site | - | 312384 | 312384 | -594  | 11382 | AN2097 |
| 1986 | CONTIG32 | 314564 | 314851 | 1.38 | 1.08E-01 | transcription_start_site | - | 313425 | 313425 | -1282 | 11379 | AN2097 |
| 1986 | CONTIG32 | 314564 | 314851 | 1.38 | 1.08E-01 | transcription_start_site | - | 313229 | 313229 | -1478 | 11380 | AN2097 |
| 1986 | CONTIG32 | 314564 | 314851 | 1.38 | 1.08E-01 | transcription_start_site | - | 312613 | 312613 | -2094 | 11381 | AN2097 |
| 1986 | CONTIG32 | 314564 | 314851 | 1.38 | 1.08E-01 | transcription_start_site | - | 312384 | 312384 | -2323 | 11382 | AN2097 |
| 1522 | CONTIG32 | 312769 | 313188 | 1.57 | 3.99E-02 | transcription_start_site | + | 313825 | 313825 | -846  | 11383 | AN2098 |
| 1522 | CONTIG32 | 312769 | 313188 | 1.57 | 3.99E-02 | transcription_start_site | + | 313908 | 313908 | -929  | 11384 | AN2098 |
| 1522 | CONTIG32 | 312769 | 313188 | 1.57 | 3.99E-02 | transcription_start_site | + | 313973 | 313973 | -994  | 11385 | AN2098 |
| 1522 | CONTIG32 | 312769 | 313188 | 1.57 | 3.99E-02 | transcription_start_site | + | 314072 | 314072 | -1093 | 11386 | AN2098 |
| 1522 | CONTIG32 | 312769 | 313188 | 1.57 | 3.99E-02 | transcription_start_site | + | 314222 | 314222 | -1243 | 11387 | AN2098 |
| 1986 | CONTIG32 | 314564 | 314851 | 1.38 | 1.08E-01 | transcription_start_site | + | 314222 | 314222 | 485   | 11387 | AN2098 |
| 1986 | CONTIG32 | 314564 | 314851 | 1.38 | 1.08E-01 | transcription_start_site | + | 314072 | 314072 | 635   | 11386 | AN2098 |
| 1986 | CONTIG32 | 314564 | 314851 | 1.38 | 1.08E-01 | transcription_start_site | + | 313973 | 313973 | 734   | 11385 | AN2098 |
| 1986 | CONTIG32 | 314564 | 314851 | 1.38 | 1.08E-01 | transcription_start_site | + | 313908 | 313908 | 799   | 11384 | AN2098 |
| 1986 | CONTIG32 | 314564 | 314851 | 1.38 | 1.08E-01 | transcription_start_site | + | 313825 | 313825 | 882   | 11383 | AN2098 |
| 1522 | CONTIG32 | 312769 | 313188 | 1.57 | 3.99E-02 | transcription_start_site | + | 315316 | 315316 | -2337 | 11388 | AN2099 |
| 1522 | CONTIG32 | 312769 | 313188 | 1.57 | 3.99E-02 | transcription_start_site | + | 315628 | 315628 | -2649 | 11389 | AN2099 |
| 1522 | CONTIG32 | 312769 | 313188 | 1.57 | 3.99E-02 | transcription_start_site | + | 315979 | 315979 | -3000 | 11390 | AN2099 |
| 1986 | CONTIG32 | 314564 | 314851 | 1.38 | 1.08E-01 | transcription_start_site | + | 315316 | 315316 | -608  | 11388 | AN2099 |
| 1986 | CONTIG32 | 314564 | 314851 | 1.38 | 1.08E-01 | transcription_start_site | + | 315628 | 315628 | -920  | 11389 | AN2099 |
| 1986 | CONTIG32 | 314564 | 314851 | 1.38 | 1.08E-01 | transcription_start_site | + | 315979 | 315979 | -1271 | 11390 | AN2099 |
| 1522 | CONTIG32 | 312769 | 313188 | 1.57 | 3.99E-02 | transcription_start_site | + | 317381 | 317381 | -4402 | 11391 | AN2100 |
| 1986 | CONTIG32 | 314564 | 314851 | 1.38 | 1.08E-01 | transcription_start_site | + | 317381 | 317381 | -2673 | 11391 | AN2100 |
| 814  | CONTIG32 | 320264 | 320528 | 2.09 | 8.81E-03 | transcription_start_site | + | 319888 | 319888 | 508   | 11392 | AN2101 |
| 1781 | CONTIG32 | 322294 | 322568 | 1.47 | 8.01E-02 | transcription_start_site | - | 323313 | 323313 | 882   | 11395 | AN2102 |
| 1781 | CONTIG32 | 322294 | 322568 | 1.47 | 8.01E-02 | transcription_start_site | - | 323428 | 323428 | 997   | 11394 | AN2102 |
| 814  | CONTIG32 | 320264 | 320528 | 2.09 | 8.81E-03 | transcription_start_site | + | 325094 | 325094 | -4698 | 11399 | AN2104 |
| 1781 | CONTIG32 | 322294 | 322568 | 1.47 | 8.01E-02 | transcription_start_site | + | 325094 | 325094 | -2663 | 11399 | AN2104 |
| 266  | CONTIG32 | 340436 | 340795 | 2.81 | 6.10E-04 | transcription_start_site | + | 343418 | 343418 | -2802 | 11407 | AN2108 |
| 266  | CONTIG32 | 340436 | 340795 | 2.81 | 6.10E-04 | transcription_start_site | + | 343644 | 343644 | -3028 | 11408 | AN2108 |
| 266  | CONTIG32 | 340436 | 340795 | 2.81 | 6.10E-04 | transcription_start_site | + | 344125 | 344125 | -3509 | 11409 | AN2108 |
| 266  | CONTIG32 | 340436 | 340795 | 2.81 | 6.10E-04 | transcription_start_site | + | 344351 | 344351 | -3735 | 11410 | AN2108 |
| 266  | CONTIG32 | 340436 | 340795 | 2.81 | 6.10E-04 | transcription_start_site | + | 344503 | 344503 | -3887 | 11411 | AN2108 |
| 266  | CONTIG32 | 340436 | 340795 | 2.81 | 6.10E-04 | transcription_start_site | + | 344600 | 344600 | -3984 | 11412 | AN2108 |
| 1334 | CONTIG32 | 339231 | 339590 | 1.67 | 4.36E-02 | transcription_start_site | + | 343418 | 343418 | -4007 | 11407 | AN2108 |
| 1334 | CONTIG32 | 339231 | 339590 | 1.67 | 4.36E-02 | transcription_start_site | + | 343644 | 343644 | -4233 | 11408 | AN2108 |
| 1334 | CONTIG32 | 339231 | 339590 | 1.67 | 4.36E-02 | transcription_start_site | + | 344125 | 344125 | -4714 | 11409 | AN2108 |
| 1334 | CONTIG32 | 339231 | 339590 | 1.67 | 4.36E-02 | transcription_start_site | + | 344351 | 344351 | -4940 | 11410 | AN2108 |
| 1334 | CONTIG32 | 339231 | 339590 | 1.67 | 4.36E-02 | transcription_start_site | + | 344503 | 344503 | -5092 | 11411 | AN2108 |
| 2389 | CONTIG32 | 357676 | 358100 | 1.24 | 1.66E-01 | transcription_start_site | - | 352942 | 352942 | -4946 | 11413 | AN2110 |
| 151  | CONTIG32 | 362721 | 363055 | 3.04 | 0.00E+00 | transcription_start_site | - | 359115 | 359115 | -3773 | 11420 | AN2113 |
| 151  | CONTIG32 | 362721 | 363055 | 3.04 | 0.00E+00 | transcription_start_site | - | 358839 | 358839 | -4049 | 11421 | AN2113 |
| 151  | CONTIG32 | 362721 | 363055 | 3.04 | 0.00E+00 | transcription_start_site | - | 358630 | 358630 | -4258 | 11422 | AN2113 |
| 151  | CONTIG32 | 362721 | 363055 | 3.04 | 0.00E+00 | transcription_start_site | - | 357973 | 357973 | -4915 | 11423 | AN2113 |
| 1432 | CONTIG32 | 359721 | 360280 | 1.62 | 5.22E-02 | transcription_start_site | - | 359115 | 359115 | -885  | 11420 | AN2113 |
| 1432 | CONTIG32 | 359721 | 360280 | 1.62 | 5.22E-02 | transcription_start_site | - | 358839 | 358839 | -1161 | 11421 | AN2113 |
| 1432 | CONTIG32 | 359721 | 360280 | 1.62 | 5.22E-02 | transcription_start_site | - | 358630 | 358630 | -1370 | 11422 | AN2113 |
| 1432 | CONTIG32 | 359721 | 360280 | 1.62 | 5.22E-02 | transcription_start_site | - | 357973 | 357973 | -2027 | 11423 | AN2113 |
| 2389 | CONTIG32 | 357676 | 358100 | 1.24 | 1.66E-01 | transcription_start_site | - | 357973 | 357973 | 85    | 11423 | AN2113 |

|      |          |        |        |      |          |                          |   |        |        |       |       |        |
|------|----------|--------|--------|------|----------|--------------------------|---|--------|--------|-------|-------|--------|
| 2389 | CONTIG32 | 357676 | 358100 | 1.24 | 1.66E-01 | transcription_start_site | - | 358630 | 358630 | 742   | 11422 | AN2113 |
| 2389 | CONTIG32 | 357676 | 358100 | 1.24 | 1.66E-01 | transcription_start_site | - | 358839 | 358839 | 951   | 11421 | AN2113 |
| 151  | CONTIG32 | 362721 | 363055 | 3.04 | 0.00E+00 | transcription_start_site | + | 364723 | 364723 | -1835 | 11424 | AN2114 |
| 151  | CONTIG32 | 362721 | 363055 | 3.04 | 0.00E+00 | transcription_start_site | + | 365487 | 365487 | -2599 | 11425 | AN2114 |
| 151  | CONTIG32 | 362721 | 363055 | 3.04 | 0.00E+00 | transcription_start_site | + | 365766 | 365766 | -2878 | 11426 | AN2114 |
| 1432 | CONTIG32 | 359721 | 360280 | 1.62 | 5.22E-02 | transcription_start_site | + | 364723 | 364723 | -4722 | 11424 | AN2114 |
| 1864 | CONTIG32 | 426162 | 426507 | 1.43 | 9.24E-02 | transcription_start_site | - | 425993 | 425993 | -341  | 11471 | AN2130 |
| 1864 | CONTIG32 | 426162 | 426507 | 1.43 | 9.24E-02 | transcription_start_site | - | 422772 | 422772 | -3562 | 11472 | AN2130 |
| 1864 | CONTIG32 | 426162 | 426507 | 1.43 | 9.24E-02 | transcription_start_site | - | 422477 | 422477 | -3857 | 11473 | AN2130 |
| 434  | CONTIG34 | 7351   | 7722   | 2.54 | 2.16E-04 | transcription_start_site | - | 3195   | 3195   | -4341 | 11476 | AN2132 |
| 1743 | CONTIG34 | 2476   | 3065   | 1.48 | 2.64E-02 | transcription_start_site | - | 3195   | 3195   | 424   | 11476 | AN2132 |
| 1743 | CONTIG34 | 2476   | 3065   | 1.48 | 2.64E-02 | transcription_start_site | - | 1794   | 1794   | -976  | 11477 | AN2132 |
| 1743 | CONTIG34 | 2476   | 3065   | 1.48 | 2.64E-02 | transcription_start_site | - | 1755   | 1755   | -1015 | 11478 | AN2132 |
| 2746 | CONTIG34 | 4146   | 4711   | 1.1  | 1.50E-01 | transcription_start_site | - | 3195   | 3195   | -1233 | 11476 | AN2132 |
| 2746 | CONTIG34 | 4146   | 4711   | 1.1  | 1.50E-01 | transcription_start_site | - | 1794   | 1794   | -2634 | 11477 | AN2132 |
| 2746 | CONTIG34 | 4146   | 4711   | 1.1  | 1.50E-01 | transcription_start_site | - | 1755   | 1755   | -2673 | 11478 | AN2132 |
| 1743 | CONTIG34 | 2476   | 3065   | 1.48 | 2.64E-02 | transcription_start_site | + | 3640   | 3640   | -869  | 11479 | AN2133 |
| 1743 | CONTIG34 | 2476   | 3065   | 1.48 | 2.64E-02 | transcription_start_site | + | 3876   | 3876   | -1105 | 11480 | AN2133 |
| 1743 | CONTIG34 | 2476   | 3065   | 1.48 | 2.64E-02 | transcription_start_site | + | 4033   | 4033   | -1262 | 11481 | AN2133 |
| 2746 | CONTIG34 | 4146   | 4711   | 1.1  | 1.50E-01 | transcription_start_site | + | 4033   | 4033   | 395   | 11481 | AN2133 |
| 2746 | CONTIG34 | 4146   | 4711   | 1.1  | 1.50E-01 | transcription_start_site | + | 3876   | 3876   | 552   | 11480 | AN2133 |
| 2746 | CONTIG34 | 4146   | 4711   | 1.1  | 1.50E-01 | transcription_start_site | + | 3640   | 3640   | 788   | 11479 | AN2133 |
| 434  | CONTIG34 | 7351   | 7722   | 2.54 | 2.16E-04 | transcription_start_site | - | 6844   | 6844   | -692  | 11482 | AN2134 |
| 434  | CONTIG34 | 7351   | 7722   | 2.54 | 2.16E-04 | transcription_start_site | - | 6117   | 6117   | -1419 | 11483 | AN2134 |
| 434  | CONTIG34 | 7351   | 7722   | 2.54 | 2.16E-04 | transcription_start_site | - | 6051   | 6051   | -1485 | 11484 | AN2134 |
| 434  | CONTIG34 | 7351   | 7722   | 2.54 | 2.16E-04 | transcription_start_site | - | 5844   | 5844   | -1692 | 11485 | AN2134 |
| 434  | CONTIG34 | 7351   | 7722   | 2.54 | 2.16E-04 | transcription_start_site | - | 5735   | 5735   | -1801 | 11486 | AN2134 |
| 434  | CONTIG34 | 7351   | 7722   | 2.54 | 2.16E-04 | transcription_start_site | - | 5371   | 5371   | -2165 | 11487 | AN2134 |
| 434  | CONTIG34 | 7351   | 7722   | 2.54 | 2.16E-04 | transcription_start_site | - | 4957   | 4957   | -2579 | 11488 | AN2134 |
| 1306 | CONTIG34 | 9021   | 9575   | 1.69 | 1.84E-02 | transcription_start_site | - | 6844   | 6844   | -2454 | 11482 | AN2134 |
| 1306 | CONTIG34 | 9021   | 9575   | 1.69 | 1.84E-02 | transcription_start_site | - | 6117   | 6117   | -3181 | 11483 | AN2134 |
| 1306 | CONTIG34 | 9021   | 9575   | 1.69 | 1.84E-02 | transcription_start_site | - | 6051   | 6051   | -3247 | 11484 | AN2134 |
| 1306 | CONTIG34 | 9021   | 9575   | 1.69 | 1.84E-02 | transcription_start_site | - | 5844   | 5844   | -3454 | 11485 | AN2134 |
| 1306 | CONTIG34 | 9021   | 9575   | 1.69 | 1.84E-02 | transcription_start_site | - | 5735   | 5735   | -3563 | 11486 | AN2134 |
| 1306 | CONTIG34 | 9021   | 9575   | 1.69 | 1.84E-02 | transcription_start_site | - | 5371   | 5371   | -3927 | 11487 | AN2134 |
| 1306 | CONTIG34 | 9021   | 9575   | 1.69 | 1.84E-02 | transcription_start_site | - | 4957   | 4957   | -4341 | 11488 | AN2134 |
| 2746 | CONTIG34 | 4146   | 4711   | 1.1  | 1.50E-01 | transcription_start_site | - | 4957   | 4957   | 528   | 11488 | AN2134 |
| 2746 | CONTIG34 | 4146   | 4711   | 1.1  | 1.50E-01 | transcription_start_site | - | 5371   | 5371   | 942   | 11487 | AN2134 |
| 1306 | CONTIG34 | 9021   | 9575   | 1.69 | 1.84E-02 | transcription_start_site | - | 9544   | 9544   | 246   | 11489 | AN2135 |
| 789  | CONTIG34 | 42920  | 43254  | 2.11 | 3.03E-03 | transcription_start_site | - | 39010  | 39010  | -4077 | 11510 | AN2143 |
| 789  | CONTIG34 | 42920  | 43254  | 2.11 | 3.03E-03 | transcription_start_site | - | 38453  | 38453  | -4634 | 11511 | AN2143 |
| 789  | CONTIG34 | 42920  | 43254  | 2.11 | 3.03E-03 | transcription_start_site | - | 42921  | 42921  | -166  | 11513 | AN2145 |
| 789  | CONTIG34 | 42920  | 43254  | 2.11 | 3.03E-03 | transcription_start_site | - | 42450  | 42450  | -637  | 11514 | AN2145 |
| 789  | CONTIG34 | 42920  | 43254  | 2.11 | 3.03E-03 | transcription_start_site | + | 44646  | 44646  | -1559 | 11515 | AN2146 |
| 789  | CONTIG34 | 42920  | 43254  | 2.11 | 3.03E-03 | transcription_start_site | + | 44723  | 44723  | -1636 | 11516 | AN2146 |
| 2748 | CONTIG34 | 62401  | 62675  | 1.1  | 1.66E-01 | transcription_start_site | - | 61735  | 61735  | -803  | 11534 | AN2151 |
| 1244 | CONTIG34 | 86177  | 86461  | 1.73 | 1.57E-02 | transcription_start_site | + | 88745  | 88745  | -2426 | 11560 | AN2160 |
| 1244 | CONTIG34 | 86177  | 86461  | 1.73 | 1.57E-02 | transcription_start_site | + | 88932  | 88932  | -2613 | 11561 | AN2160 |
| 1244 | CONTIG34 | 86177  | 86461  | 1.73 | 1.57E-02 | transcription_start_site | + | 89797  | 89797  | -3478 | 11562 | AN2160 |
| 1244 | CONTIG34 | 86177  | 86461  | 1.73 | 1.57E-02 | transcription_start_site | + | 90049  | 90049  | -3730 | 11563 | AN2160 |
| 2289 | CONTIG34 | 97805  | 98155  | 1.27 | 9.24E-02 | transcription_start_site | - | 97503  | 97503  | -477  | 11568 | AN2163 |
| 2817 | CONTIG34 | 99084  | 99428  | 1.06 | 1.93E-01 | transcription_start_site | - | 97503  | 97503  | -1753 | 11568 | AN2163 |
| 2289 | CONTIG34 | 97805  | 98155  | 1.27 | 9.24E-02 | transcription_start_site | + | 99581  | 99581  | -1601 | 11569 | AN2164 |
| 2817 | CONTIG34 | 99084  | 99428  | 1.06 | 1.93E-01 | transcription_start_site | + | 99581  | 99581  | -325  | 11569 | AN2164 |
| 868  | CONTIG34 | 102994 | 103478 | 2.03 | 4.61E-03 | transcription_start_site | + | 103453 | 103453 | -217  | 11570 | AN2165 |
| 868  | CONTIG34 | 102994 | 103478 | 2.03 | 4.61E-03 | transcription_start_site | + | 104390 | 104390 | -1154 | 11571 | AN2165 |
| 2666 | CONTIG34 | 104784 | 105058 | 1.14 | 1.44E-01 | transcription_start_site | + | 104390 | 104390 | 531   | 11571 | AN2165 |

|      |          |        |        |      |          |                          |   |        |        |       |       |        |
|------|----------|--------|--------|------|----------|--------------------------|---|--------|--------|-------|-------|--------|
| 2817 | CONTIG34 | 99084  | 99428  | 1.06 | 1.93E-01 | transcription_start_site | + | 103453 | 103453 | -4197 | 11570 | AN2165 |
| 2817 | CONTIG34 | 99084  | 99428  | 1.06 | 1.93E-01 | transcription_start_site | + | 104390 | 104390 | -5134 | 11571 | AN2165 |
| 2050 | CONTIG34 | 107559 | 108818 | 1.35 | 6.84E-02 | transcription_start_site | - | 105792 | 105792 | -2396 | 11572 | AN2166 |
| 2666 | CONTIG34 | 104784 | 105058 | 1.14 | 1.44E-01 | transcription_start_site | - | 105792 | 105792 | 871   | 11572 | AN2166 |
| 868  | CONTIG34 | 102994 | 103478 | 2.03 | 4.61E-03 | transcription_start_site | + | 106334 | 106334 | -3098 | 11573 | AN2167 |
| 868  | CONTIG34 | 102994 | 103478 | 2.03 | 4.61E-03 | transcription_start_site | + | 106496 | 106496 | -3260 | 11574 | AN2167 |
| 868  | CONTIG34 | 102994 | 103478 | 2.03 | 4.61E-03 | transcription_start_site | + | 106710 | 106710 | -3474 | 11575 | AN2167 |
| 868  | CONTIG34 | 102994 | 103478 | 2.03 | 4.61E-03 | transcription_start_site | + | 106921 | 106921 | -3685 | 11576 | AN2167 |
| 2050 | CONTIG34 | 107559 | 108818 | 1.35 | 6.84E-02 | transcription_start_site | + | 106921 | 106921 | 1267  | 11576 | AN2167 |
| 2050 | CONTIG34 | 107559 | 108818 | 1.35 | 6.84E-02 | transcription_start_site | + | 106710 | 106710 | 1478  | 11575 | AN2167 |
| 2666 | CONTIG34 | 104784 | 105058 | 1.14 | 1.44E-01 | transcription_start_site | + | 106334 | 106334 | -1413 | 11573 | AN2167 |
| 2666 | CONTIG34 | 104784 | 105058 | 1.14 | 1.44E-01 | transcription_start_site | + | 106496 | 106496 | -1575 | 11574 | AN2167 |
| 2666 | CONTIG34 | 104784 | 105058 | 1.14 | 1.44E-01 | transcription_start_site | + | 106710 | 106710 | -1789 | 11575 | AN2167 |
| 2666 | CONTIG34 | 104784 | 105058 | 1.14 | 1.44E-01 | transcription_start_site | + | 106921 | 106921 | -2000 | 11576 | AN2167 |
| 1365 | CONTIG34 | 113194 | 113614 | 1.65 | 1.06E-02 | transcription_start_site | - | 110815 | 110815 | -2589 | 11577 | AN2168 |
| 1365 | CONTIG34 | 113194 | 113614 | 1.65 | 1.06E-02 | transcription_start_site | - | 110175 | 110175 | -3229 | 11578 | AN2168 |
| 2290 | CONTIG34 | 112054 | 113153 | 1.27 | 9.24E-02 | transcription_start_site | - | 110815 | 110815 | -1788 | 11577 | AN2168 |
| 2290 | CONTIG34 | 112054 | 113153 | 1.27 | 9.24E-02 | transcription_start_site | - | 110175 | 110175 | -2428 | 11578 | AN2168 |
| 2291 | CONTIG34 | 114908 | 115345 | 1.27 | 9.24E-02 | transcription_start_site | - | 110815 | 110815 | -4311 | 11577 | AN2168 |
| 2291 | CONTIG34 | 114908 | 115345 | 1.27 | 9.24E-02 | transcription_start_site | - | 110175 | 110175 | -4951 | 11578 | AN2168 |
| 2050 | CONTIG34 | 107559 | 108818 | 1.35 | 6.84E-02 | transcription_start_site | + | 111450 | 111450 | -3261 | 11579 | AN2169 |
| 2290 | CONTIG34 | 112054 | 113153 | 1.27 | 9.24E-02 | transcription_start_site | + | 111450 | 111450 | 1153  | 11579 | AN2169 |
| 1365 | CONTIG34 | 113194 | 113614 | 1.65 | 1.06E-02 | transcription_start_site | + | 113323 | 113323 | 81    | 11580 | AN2170 |
| 1365 | CONTIG34 | 113194 | 113614 | 1.65 | 1.06E-02 | transcription_start_site | + | 113593 | 113593 | -189  | 11581 | AN2170 |
| 2050 | CONTIG34 | 107559 | 108818 | 1.35 | 6.84E-02 | transcription_start_site | + | 113323 | 113323 | -5134 | 11580 | AN2170 |
| 2050 | CONTIG34 | 107559 | 108818 | 1.35 | 6.84E-02 | transcription_start_site | + | 113593 | 113593 | -5404 | 11581 | AN2170 |
| 2290 | CONTIG34 | 112054 | 113153 | 1.27 | 9.24E-02 | transcription_start_site | + | 113323 | 113323 | -719  | 11580 | AN2170 |
| 2290 | CONTIG34 | 112054 | 113153 | 1.27 | 9.24E-02 | transcription_start_site | + | 113593 | 113593 | -989  | 11581 | AN2170 |
| 525  | CONTIG34 | 116488 | 116841 | 2.41 | 8.69E-04 | transcription_start_site | - | 115658 | 115658 | -1006 | 11582 | AN2171 |
| 525  | CONTIG34 | 116488 | 116841 | 2.41 | 8.69E-04 | transcription_start_site | - | 115291 | 115291 | -1373 | 11583 | AN2171 |
| 1919 | CONTIG34 | 119643 | 119907 | 1.4  | 5.88E-02 | transcription_start_site | - | 115658 | 115658 | -4117 | 11582 | AN2171 |
| 1919 | CONTIG34 | 119643 | 119907 | 1.4  | 5.88E-02 | transcription_start_site | - | 115291 | 115291 | -4484 | 11583 | AN2171 |
| 2291 | CONTIG34 | 114908 | 115345 | 1.27 | 9.24E-02 | transcription_start_site | - | 115291 | 115291 | 164   | 11583 | AN2171 |
| 2291 | CONTIG34 | 114908 | 115345 | 1.27 | 9.24E-02 | transcription_start_site | - | 115658 | 115658 | 531   | 11582 | AN2171 |
| 1919 | CONTIG34 | 119643 | 119907 | 1.4  | 5.88E-02 | transcription_start_site | - | 119197 | 119197 | -578  | 11584 | AN2172 |
| 1919 | CONTIG34 | 119643 | 119907 | 1.4  | 5.88E-02 | transcription_start_site | - | 118964 | 118964 | -811  | 11585 | AN2172 |
| 525  | CONTIG34 | 116488 | 116841 | 2.41 | 8.69E-04 | transcription_start_site | + | 120005 | 120005 | -3340 | 11586 | AN2173 |
| 525  | CONTIG34 | 116488 | 116841 | 2.41 | 8.69E-04 | transcription_start_site | + | 120225 | 120225 | -3560 | 11587 | AN2173 |
| 525  | CONTIG34 | 116488 | 116841 | 2.41 | 8.69E-04 | transcription_start_site | + | 120396 | 120396 | -3731 | 11588 | AN2173 |
| 525  | CONTIG34 | 116488 | 116841 | 2.41 | 8.69E-04 | transcription_start_site | + | 120663 | 120663 | -3998 | 11589 | AN2173 |
| 525  | CONTIG34 | 116488 | 116841 | 2.41 | 8.69E-04 | transcription_start_site | + | 121314 | 121314 | -4649 | 11590 | AN2173 |
| 525  | CONTIG34 | 116488 | 116841 | 2.41 | 8.69E-04 | transcription_start_site | + | 121437 | 121437 | -4772 | 11591 | AN2173 |
| 525  | CONTIG34 | 116488 | 116841 | 2.41 | 8.69E-04 | transcription_start_site | + | 121594 | 121594 | -4929 | 11592 | AN2173 |
| 525  | CONTIG34 | 116488 | 116841 | 2.41 | 8.69E-04 | transcription_start_site | + | 121677 | 121677 | -5012 | 11593 | AN2173 |
| 1919 | CONTIG34 | 119643 | 119907 | 1.4  | 5.88E-02 | transcription_start_site | + | 120005 | 120005 | -230  | 11586 | AN2173 |
| 1919 | CONTIG34 | 119643 | 119907 | 1.4  | 5.88E-02 | transcription_start_site | + | 120225 | 120225 | -450  | 11587 | AN2173 |
| 1919 | CONTIG34 | 119643 | 119907 | 1.4  | 5.88E-02 | transcription_start_site | + | 120396 | 120396 | -621  | 11588 | AN2173 |
| 1919 | CONTIG34 | 119643 | 119907 | 1.4  | 5.88E-02 | transcription_start_site | + | 120663 | 120663 | -888  | 11589 | AN2173 |
| 1919 | CONTIG34 | 119643 | 119907 | 1.4  | 5.88E-02 | transcription_start_site | + | 121314 | 121314 | -1539 | 11590 | AN2173 |
| 1919 | CONTIG34 | 119643 | 119907 | 1.4  | 5.88E-02 | transcription_start_site | + | 121437 | 121437 | -1662 | 11591 | AN2173 |
| 1919 | CONTIG34 | 119643 | 119907 | 1.4  | 5.88E-02 | transcription_start_site | + | 121594 | 121594 | -1819 | 11592 | AN2173 |
| 1919 | CONTIG34 | 119643 | 119907 | 1.4  | 5.88E-02 | transcription_start_site | + | 121677 | 121677 | -1902 | 11593 | AN2173 |
| 2291 | CONTIG34 | 114908 | 115345 | 1.27 | 9.24E-02 | transcription_start_site | + | 120005 | 120005 | -4878 | 11586 | AN2173 |
| 2291 | CONTIG34 | 114908 | 115345 | 1.27 | 9.24E-02 | transcription_start_site | + | 120225 | 120225 | -5098 | 11587 | AN2173 |
| 209  | CONTIG34 | 135018 | 135292 | 2.92 | 0.00E+00 | transcription_start_site | + | 135894 | 135894 | -739  | 11602 | AN2177 |
| 209  | CONTIG34 | 135018 | 135292 | 2.92 | 0.00E+00 | transcription_start_site | + | 136288 | 136288 | -1133 | 11603 | AN2177 |
| 1741 | CONTIG34 | 135468 | 136329 | 1.48 | 2.45E-02 | transcription_start_site | + | 135894 | 135894 | 4     | 11602 | AN2177 |

|      |          |        |        |      |          |                          |   |        |        |       |       |        |
|------|----------|--------|--------|------|----------|--------------------------|---|--------|--------|-------|-------|--------|
| 1741 | CONTIG34 | 135468 | 136329 | 1.48 | 2.45E-02 | transcription_start_site | + | 136288 | 136288 | -389  | 11603 | AN2177 |
| 2292 | CONTIG34 | 137045 | 137394 | 1.27 | 9.24E-02 | transcription_start_site | + | 136288 | 136288 | 931   | 11603 | AN2177 |
| 2051 | CONTIG34 | 154276 | 154561 | 1.35 | 6.84E-02 | transcription_start_site | + | 154637 | 154637 | -218  | 11611 | AN2183 |
| 2051 | CONTIG34 | 154276 | 154561 | 1.35 | 6.84E-02 | transcription_start_site | + | 156347 | 156347 | -1928 | 11612 | AN2184 |
| 2051 | CONTIG34 | 154276 | 154561 | 1.35 | 6.84E-02 | transcription_start_site | + | 156970 | 156970 | -2551 | 11613 | AN2184 |
| 2051 | CONTIG34 | 154276 | 154561 | 1.35 | 6.84E-02 | transcription_start_site | + | 157267 | 157267 | -2848 | 11614 | AN2184 |
| 2052 | CONTIG34 | 156607 | 156876 | 1.35 | 6.84E-02 | transcription_start_site | + | 156970 | 156970 | -228  | 11613 | AN2184 |
| 2052 | CONTIG34 | 156607 | 156876 | 1.35 | 6.84E-02 | transcription_start_site | + | 156347 | 156347 | 394   | 11612 | AN2184 |
| 2052 | CONTIG34 | 156607 | 156876 | 1.35 | 6.84E-02 | transcription_start_site | + | 157267 | 157267 | -525  | 11614 | AN2184 |
| 2284 | CONTIG34 | 158027 | 158687 | 1.27 | 7.51E-02 | transcription_start_site | + | 157267 | 157267 | 1090  | 11614 | AN2184 |
| 2284 | CONTIG34 | 158027 | 158687 | 1.27 | 7.51E-02 | transcription_start_site | - | 158754 | 158754 | 397   | 11615 | AN2185 |
| 2052 | CONTIG34 | 156607 | 156876 | 1.35 | 6.84E-02 | transcription_start_site | + | 159796 | 159796 | -3054 | 11616 | AN2186 |
| 2052 | CONTIG34 | 156607 | 156876 | 1.35 | 6.84E-02 | transcription_start_site | + | 160517 | 160517 | -3775 | 11617 | AN2186 |
| 2284 | CONTIG34 | 158027 | 158687 | 1.27 | 7.51E-02 | transcription_start_site | + | 159796 | 159796 | -1439 | 11616 | AN2186 |
| 2284 | CONTIG34 | 158027 | 158687 | 1.27 | 7.51E-02 | transcription_start_site | + | 160517 | 160517 | -2160 | 11617 | AN2186 |
| 2667 | CONTIG34 | 164933 | 165202 | 1.14 | 1.44E-01 | transcription_start_site | - | 162515 | 162515 | -2552 | 11618 | AN2187 |
| 2667 | CONTIG34 | 164933 | 165202 | 1.14 | 1.44E-01 | transcription_start_site | - | 161929 | 161929 | -3138 | 11619 | AN2187 |
| 2284 | CONTIG34 | 158027 | 158687 | 1.27 | 7.51E-02 | transcription_start_site | + | 163091 | 163091 | -4734 | 11620 | AN2188 |
| 2667 | CONTIG34 | 164933 | 165202 | 1.14 | 1.44E-01 | transcription_start_site | - | 165500 | 165500 | 432   | 11622 | AN2189 |
| 2667 | CONTIG34 | 164933 | 165202 | 1.14 | 1.44E-01 | transcription_start_site | + | 166085 | 166085 | -1017 | 11623 | AN2190 |
| 2667 | CONTIG34 | 164933 | 165202 | 1.14 | 1.44E-01 | transcription_start_site | + | 167230 | 167230 | -2162 | 11624 | AN2190 |
| 2667 | CONTIG34 | 164933 | 165202 | 1.14 | 1.44E-01 | transcription_start_site | + | 170093 | 170093 | -5025 | 11625 | AN2191 |
| 2929 | CONTIG35 | 27826  | 28270  | 0.99 | 1.93E-01 | transcription_start_site | - | 24376  | 24376  | -3672 | 11670 | AN2199 |
| 2929 | CONTIG35 | 27826  | 28270  | 0.99 | 1.93E-01 | transcription_start_site | - | 23538  | 23538  | -4510 | 11671 | AN2199 |
| 2929 | CONTIG35 | 27826  | 28270  | 0.99 | 1.93E-01 | transcription_start_site | - | 23170  | 23170  | -4878 | 11672 | AN2199 |
| 2929 | CONTIG35 | 27826  | 28270  | 0.99 | 1.93E-01 | transcription_start_site | + | 27701  | 27701  | 347   | 11674 | AN2200 |
| 2929 | CONTIG35 | 27826  | 28270  | 0.99 | 1.93E-01 | transcription_start_site | + | 28471  | 28471  | -423  | 11675 | AN2200 |
| 2929 | CONTIG35 | 27826  | 28270  | 0.99 | 1.93E-01 | transcription_start_site | + | 27516  | 27516  | 532   | 11673 | AN2200 |
| 2929 | CONTIG35 | 27826  | 28270  | 0.99 | 1.93E-01 | transcription_start_site | + | 28691  | 28691  | -643  | 11676 | AN2200 |
| 2930 | CONTIG35 | 41187  | 41986  | 0.99 | 1.93E-01 | transcription_start_site | - | 36798  | 36798  | -4788 | 11685 | AN2204 |
| 2930 | CONTIG35 | 41187  | 41986  | 0.99 | 1.93E-01 | transcription_start_site | - | 36278  | 36278  | -5308 | 11686 | AN2204 |
| 2930 | CONTIG35 | 41187  | 41986  | 0.99 | 1.93E-01 | transcription_start_site | - | 40699  | 40699  | -887  | 11688 | AN2205 |
| 2930 | CONTIG35 | 41187  | 41986  | 0.99 | 1.93E-01 | transcription_start_site | - | 40345  | 40345  | -1241 | 11689 | AN2205 |
| 2930 | CONTIG35 | 41187  | 41986  | 0.99 | 1.93E-01 | transcription_start_site | + | 46843  | 46843  | -5256 | 11690 | AN2207 |
| 2930 | CONTIG35 | 41187  | 41986  | 0.99 | 1.93E-01 | transcription_start_site | + | 46939  | 46939  | -5352 | 11691 | AN2207 |
| 2931 | CONTIG35 | 47717  | 47988  | 0.99 | 1.93E-01 | transcription_start_site | + | 47745  | 47745  | 107   | 11692 | AN2207 |
| 2931 | CONTIG35 | 47717  | 47988  | 0.99 | 1.93E-01 | transcription_start_site | + | 46939  | 46939  | 913   | 11691 | AN2207 |
| 2931 | CONTIG35 | 47717  | 47988  | 0.99 | 1.93E-01 | transcription_start_site | + | 46843  | 46843  | 1009  | 11690 | AN2207 |
| 2932 | CONTIG35 | 48377  | 48956  | 0.99 | 1.93E-01 | transcription_start_site | + | 47745  | 47745  | 921   | 11692 | AN2207 |
| 798  | CONTIG35 | 49357  | 49725  | 2.1  | 1.54E-03 | transcription_start_site | + | 49193  | 49193  | 348   | 11697 | AN2208 |
| 798  | CONTIG35 | 49357  | 49725  | 2.1  | 1.54E-03 | transcription_start_site | + | 49041  | 49041  | 500   | 11696 | AN2208 |
| 798  | CONTIG35 | 49357  | 49725  | 2.1  | 1.54E-03 | transcription_start_site | + | 48578  | 48578  | 963   | 11695 | AN2208 |
| 798  | CONTIG35 | 49357  | 49725  | 2.1  | 1.54E-03 | transcription_start_site | + | 48430  | 48430  | 1111  | 11694 | AN2208 |
| 2931 | CONTIG35 | 47717  | 47988  | 0.99 | 1.93E-01 | transcription_start_site | + | 48056  | 48056  | -203  | 11693 | AN2208 |
| 2931 | CONTIG35 | 47717  | 47988  | 0.99 | 1.93E-01 | transcription_start_site | + | 48430  | 48430  | -577  | 11694 | AN2208 |
| 2931 | CONTIG35 | 47717  | 47988  | 0.99 | 1.93E-01 | transcription_start_site | + | 48578  | 48578  | -725  | 11695 | AN2208 |
| 2931 | CONTIG35 | 47717  | 47988  | 0.99 | 1.93E-01 | transcription_start_site | + | 49041  | 49041  | -1188 | 11696 | AN2208 |
| 2931 | CONTIG35 | 47717  | 47988  | 0.99 | 1.93E-01 | transcription_start_site | + | 49193  | 49193  | -1340 | 11697 | AN2208 |
| 2932 | CONTIG35 | 48377  | 48956  | 0.99 | 1.93E-01 | transcription_start_site | + | 48578  | 48578  | 88    | 11695 | AN2208 |
| 2932 | CONTIG35 | 48377  | 48956  | 0.99 | 1.93E-01 | transcription_start_site | + | 48430  | 48430  | 236   | 11694 | AN2208 |
| 2932 | CONTIG35 | 48377  | 48956  | 0.99 | 1.93E-01 | transcription_start_site | + | 49041  | 49041  | -374  | 11696 | AN2208 |
| 2932 | CONTIG35 | 48377  | 48956  | 0.99 | 1.93E-01 | transcription_start_site | + | 49193  | 49193  | -526  | 11697 | AN2208 |
| 2932 | CONTIG35 | 48377  | 48956  | 0.99 | 1.93E-01 | transcription_start_site | + | 48056  | 48056  | 610   | 11693 | AN2208 |
| 798  | CONTIG35 | 49357  | 49725  | 2.1  | 1.54E-03 | transcription_start_site | + | 50405  | 50405  | -864  | 11698 | AN2209 |
| 798  | CONTIG35 | 49357  | 49725  | 2.1  | 1.54E-03 | transcription_start_site | + | 50791  | 50791  | -1250 | 11699 | AN2209 |
| 965  | CONTIG35 | 51696  | 51957  | 1.94 | 3.61E-03 | transcription_start_site | + | 50791  | 50791  | 1035  | 11699 | AN2209 |
| 2931 | CONTIG35 | 47717  | 47988  | 0.99 | 1.93E-01 | transcription_start_site | + | 50405  | 50405  | -2552 | 11698 | AN2209 |

|               |       |       |      |          |                          |   |       |       |       |       |        |
|---------------|-------|-------|------|----------|--------------------------|---|-------|-------|-------|-------|--------|
| 2931 CONTIG35 | 47717 | 47988 | 0.99 | 1.93E-01 | transcription_start_site | + | 50791 | 50791 | -2938 | 11699 | AN2209 |
| 2932 CONTIG35 | 48377 | 48956 | 0.99 | 1.93E-01 | transcription_start_site | + | 50405 | 50405 | -1738 | 11698 | AN2209 |
| 2932 CONTIG35 | 48377 | 48956 | 0.99 | 1.93E-01 | transcription_start_site | + | 50791 | 50791 | -2124 | 11699 | AN2209 |
| 798 CONTIG35  | 49357 | 49725 | 2.1  | 1.54E-03 | transcription_start_site | + | 52026 | 52026 | -2485 | 11700 | AN2210 |
| 798 CONTIG35  | 49357 | 49725 | 2.1  | 1.54E-03 | transcription_start_site | + | 52638 | 52638 | -3097 | 11701 | AN2210 |
| 965 CONTIG35  | 51696 | 51957 | 1.94 | 3.61E-03 | transcription_start_site | + | 52026 | 52026 | -199  | 11700 | AN2210 |
| 965 CONTIG35  | 51696 | 51957 | 1.94 | 3.61E-03 | transcription_start_site | + | 52638 | 52638 | -811  | 11701 | AN2210 |
| 2931 CONTIG35 | 47717 | 47988 | 0.99 | 1.93E-01 | transcription_start_site | + | 52026 | 52026 | -4173 | 11700 | AN2210 |
| 2931 CONTIG35 | 47717 | 47988 | 0.99 | 1.93E-01 | transcription_start_site | + | 52638 | 52638 | -4785 | 11701 | AN2210 |
| 2932 CONTIG35 | 48377 | 48956 | 0.99 | 1.93E-01 | transcription_start_site | + | 52026 | 52026 | -3359 | 11700 | AN2210 |
| 2932 CONTIG35 | 48377 | 48956 | 0.99 | 1.93E-01 | transcription_start_site | + | 52638 | 52638 | -3971 | 11701 | AN2210 |
| 1170 CONTIG35 | 54992 | 55341 | 1.78 | 7.85E-03 | transcription_start_site | - | 55584 | 55584 | 417   | 11703 | AN2211 |
| 1170 CONTIG35 | 54992 | 55341 | 1.78 | 7.85E-03 | transcription_start_site | - | 55996 | 55996 | 829   | 11702 | AN2211 |
| 1170 CONTIG35 | 54992 | 55341 | 1.78 | 7.85E-03 | transcription_start_site | + | 58274 | 58274 | -3107 | 11707 | AN2213 |
| 1170 CONTIG35 | 54992 | 55341 | 1.78 | 7.85E-03 | transcription_start_site | + | 58336 | 58336 | -3169 | 11708 | AN2213 |
| 1170 CONTIG35 | 54992 | 55341 | 1.78 | 7.85E-03 | transcription_start_site | + | 58448 | 58448 | -3281 | 11709 | AN2213 |
| 1170 CONTIG35 | 54992 | 55341 | 1.78 | 7.85E-03 | transcription_start_site | + | 59564 | 59564 | -4397 | 11710 | AN2213 |
| 2933 CONTIG35 | 80040 | 80304 | 0.99 | 1.93E-01 | transcription_start_site | - | 76874 | 76874 | -3298 | 11729 | AN2218 |
| 2933 CONTIG35 | 80040 | 80304 | 0.99 | 1.93E-01 | transcription_start_site | - | 75901 | 75901 | -4271 | 11730 | AN2218 |
| 1009 CONTIG35 | 83420 | 83904 | 1.9  | 4.61E-03 | transcription_start_site | - | 80255 | 80255 | -3407 | 11731 | AN2219 |
| 1009 CONTIG35 | 83420 | 83904 | 1.9  | 4.61E-03 | transcription_start_site | - | 79532 | 79532 | -4130 | 11732 | AN2219 |
| 1009 CONTIG35 | 83420 | 83904 | 1.9  | 4.61E-03 | transcription_start_site | - | 79077 | 79077 | -4585 | 11733 | AN2219 |
| 1009 CONTIG35 | 83420 | 83904 | 1.9  | 4.61E-03 | transcription_start_site | - | 78934 | 78934 | -4728 | 11734 | AN2219 |
| 2933 CONTIG35 | 80040 | 80304 | 0.99 | 1.93E-01 | transcription_start_site | - | 80255 | 80255 | 83    | 11731 | AN2219 |
| 2933 CONTIG35 | 80040 | 80304 | 0.99 | 1.93E-01 | transcription_start_site | - | 79532 | 79532 | -640  | 11732 | AN2219 |
| 2933 CONTIG35 | 80040 | 80304 | 0.99 | 1.93E-01 | transcription_start_site | - | 79077 | 79077 | -1095 | 11733 | AN2219 |
| 2933 CONTIG35 | 80040 | 80304 | 0.99 | 1.93E-01 | transcription_start_site | - | 78934 | 78934 | -1238 | 11734 | AN2219 |
| 2933 CONTIG35 | 80040 | 80304 | 0.99 | 1.93E-01 | transcription_start_site | - | 77958 | 77958 | -2214 | 11735 | AN2219 |
| 2933 CONTIG35 | 80040 | 80304 | 0.99 | 1.93E-01 | transcription_start_site | + | 80918 | 80918 | -746  | 11736 | AN2220 |
| 2933 CONTIG35 | 80040 | 80304 | 0.99 | 1.93E-01 | transcription_start_site | + | 81487 | 81487 | -1315 | 11737 | AN2220 |
| 1009 CONTIG35 | 83420 | 83904 | 1.9  | 4.61E-03 | transcription_start_site | + | 82453 | 82453 | 1209  | 11739 | AN2221 |
| 2933 CONTIG35 | 80040 | 80304 | 0.99 | 1.93E-01 | transcription_start_site | + | 82124 | 82124 | -1952 | 11738 | AN2221 |
| 2933 CONTIG35 | 80040 | 80304 | 0.99 | 1.93E-01 | transcription_start_site | + | 82453 | 82453 | -2281 | 11739 | AN2221 |
| 1901 CONTIG36 | 16654 | 17843 | 1.41 | 5.52E-02 | transcription_start_site | + | 16053 | 16053 | 1195  | 11752 | AN2226 |
| 1901 CONTIG36 | 16654 | 17843 | 1.41 | 5.52E-02 | transcription_start_site | + | 19352 | 19352 | -2103 | 11753 | AN2227 |
| 1901 CONTIG36 | 16654 | 17843 | 1.41 | 5.52E-02 | transcription_start_site | + | 19480 | 19480 | -2231 | 11754 | AN2227 |
| 1901 CONTIG36 | 16654 | 17843 | 1.41 | 5.52E-02 | transcription_start_site | + | 20150 | 20150 | -2901 | 11755 | AN2227 |
| 2690 CONTIG36 | 25595 | 25929 | 1.13 | 1.93E-01 | transcription_start_site | - | 23711 | 23711 | -2051 | 11756 | AN2228 |
| 2690 CONTIG36 | 25595 | 25929 | 1.13 | 1.93E-01 | transcription_start_site | - | 23595 | 23595 | -2167 | 11757 | AN2228 |
| 2690 CONTIG36 | 25595 | 25929 | 1.13 | 1.93E-01 | transcription_start_site | - | 26282 | 26282 | 520   | 11760 | AN2229 |
| 2690 CONTIG36 | 25595 | 25929 | 1.13 | 1.93E-01 | transcription_start_site | - | 26723 | 26723 | 961   | 11759 | AN2229 |
| 2690 CONTIG36 | 25595 | 25929 | 1.13 | 1.93E-01 | transcription_start_site | - | 26820 | 26820 | 1058  | 11758 | AN2229 |
| 2690 CONTIG36 | 25595 | 25929 | 1.13 | 1.93E-01 | transcription_start_site | + | 29918 | 29918 | -4156 | 11765 | AN2231 |
| 89 CONTIG36   | 42902 | 43481 | 3.26 | 0.00E+00 | transcription_start_site | + | 43506 | 43506 | -314  | 11779 | AN2236 |
| 1390 CONTIG36 | 44187 | 45583 | 1.63 | 0.00E+00 | transcription_start_site | + | 43506 | 43506 | 1379  | 11779 | AN2236 |
| 89 CONTIG36   | 42902 | 43481 | 3.26 | 0.00E+00 | transcription_start_site | + | 46265 | 46265 | -3073 | 11780 | AN2237 |
| 89 CONTIG36   | 42902 | 43481 | 3.26 | 0.00E+00 | transcription_start_site | + | 46534 | 46534 | -3342 | 11781 | AN2237 |
| 303 CONTIG36  | 45770 | 46267 | 2.76 | 2.39E-04 | transcription_start_site | + | 46265 | 46265 | -246  | 11780 | AN2237 |
| 303 CONTIG36  | 45770 | 46267 | 2.76 | 2.39E-04 | transcription_start_site | + | 46534 | 46534 | -515  | 11781 | AN2237 |
| 1390 CONTIG36 | 44187 | 45583 | 1.63 | 0.00E+00 | transcription_start_site | + | 46265 | 46265 | -1380 | 11780 | AN2237 |
| 1390 CONTIG36 | 44187 | 45583 | 1.63 | 0.00E+00 | transcription_start_site | + | 46534 | 46534 | -1649 | 11781 | AN2237 |
| 303 CONTIG36  | 45770 | 46267 | 2.76 | 2.39E-04 | transcription_start_site | + | 48993 | 48993 | -2974 | 11782 | AN2238 |
| 303 CONTIG36  | 45770 | 46267 | 2.76 | 2.39E-04 | transcription_start_site | + | 49200 | 49200 | -3181 | 11783 | AN2238 |
| 303 CONTIG36  | 45770 | 46267 | 2.76 | 2.39E-04 | transcription_start_site | + | 49961 | 49961 | -3942 | 11784 | AN2238 |
| 1390 CONTIG36 | 44187 | 45583 | 1.63 | 0.00E+00 | transcription_start_site | + | 48993 | 48993 | -4108 | 11782 | AN2238 |
| 1390 CONTIG36 | 44187 | 45583 | 1.63 | 0.00E+00 | transcription_start_site | + | 49200 | 49200 | -4315 | 11783 | AN2238 |
| 1390 CONTIG36 | 44187 | 45583 | 1.63 | 0.00E+00 | transcription_start_site | + | 49961 | 49961 | -5076 | 11784 | AN2238 |

|      |          |       |       |      |          |                          |   |       |       |       |       |        |
|------|----------|-------|-------|------|----------|--------------------------|---|-------|-------|-------|-------|--------|
| 1185 | CONTIG36 | 84758 | 85327 | 1.77 | 2.12E-02 | transcription_start_site | - | 81072 | 81072 | -3970 | 11815 | AN2248 |
| 1185 | CONTIG36 | 84758 | 85327 | 1.77 | 2.12E-02 | transcription_start_site | - | 80760 | 80760 | -4282 | 11816 | AN2248 |
| 1185 | CONTIG36 | 84758 | 85327 | 1.77 | 2.12E-02 | transcription_start_site | - | 80661 | 80661 | -4381 | 11817 | AN2248 |
| 2293 | CONTIG36 | 78093 | 78667 | 1.27 | 1.07E-01 | transcription_start_site | - | 79448 | 79448 | 1068  | 11818 | AN2248 |
| 2443 | CONTIG36 | 80043 | 80387 | 1.22 | 1.44E-01 | transcription_start_site | - | 80661 | 80661 | 446   | 11817 | AN2248 |
| 2443 | CONTIG36 | 80043 | 80387 | 1.22 | 1.44E-01 | transcription_start_site | - | 80760 | 80760 | 545   | 11816 | AN2248 |
| 2443 | CONTIG36 | 80043 | 80387 | 1.22 | 1.44E-01 | transcription_start_site | - | 79448 | 79448 | -767  | 11818 | AN2248 |
| 2443 | CONTIG36 | 80043 | 80387 | 1.22 | 1.44E-01 | transcription_start_site | - | 81072 | 81072 | 857   | 11815 | AN2248 |
| 1185 | CONTIG36 | 84758 | 85327 | 1.77 | 2.12E-02 | transcription_start_site | - | 83560 | 83560 | -1482 | 11819 | AN2249 |
| 1185 | CONTIG36 | 84758 | 85327 | 1.77 | 2.12E-02 | transcription_start_site | - | 83306 | 83306 | -1736 | 11820 | AN2249 |
| 1185 | CONTIG36 | 84758 | 85327 | 1.77 | 2.12E-02 | transcription_start_site | - | 82951 | 82951 | -2091 | 11821 | AN2249 |
| 1185 | CONTIG36 | 84758 | 85327 | 1.77 | 2.12E-02 | transcription_start_site | - | 82578 | 82578 | -2464 | 11822 | AN2249 |
| 1185 | CONTIG36 | 84758 | 85327 | 1.77 | 2.12E-02 | transcription_start_site | - | 82014 | 82014 | -3028 | 11823 | AN2249 |
| 1905 | CONTIG36 | 88958 | 89302 | 1.41 | 8.01E-02 | transcription_start_site | - | 87155 | 87155 | -1975 | 11824 | AN2250 |
| 1905 | CONTIG36 | 88958 | 89302 | 1.41 | 8.01E-02 | transcription_start_site | - | 86830 | 86830 | -2300 | 11825 | AN2250 |
| 1905 | CONTIG36 | 88958 | 89302 | 1.41 | 8.01E-02 | transcription_start_site | - | 86588 | 86588 | -2542 | 11826 | AN2250 |
| 1185 | CONTIG36 | 84758 | 85327 | 1.77 | 2.12E-02 | transcription_start_site | + | 89582 | 89582 | -4539 | 11827 | AN2251 |
| 1185 | CONTIG36 | 84758 | 85327 | 1.77 | 2.12E-02 | transcription_start_site | + | 89903 | 89903 | -4860 | 11828 | AN2251 |
| 1185 | CONTIG36 | 84758 | 85327 | 1.77 | 2.12E-02 | transcription_start_site | + | 90100 | 90100 | -5057 | 11829 | AN2251 |
| 1185 | CONTIG36 | 84758 | 85327 | 1.77 | 2.12E-02 | transcription_start_site | + | 90238 | 90238 | -5195 | 11830 | AN2251 |
| 1905 | CONTIG36 | 88958 | 89302 | 1.41 | 8.01E-02 | transcription_start_site | + | 89582 | 89582 | -452  | 11827 | AN2251 |
| 1905 | CONTIG36 | 88958 | 89302 | 1.41 | 8.01E-02 | transcription_start_site | + | 89903 | 89903 | -773  | 11828 | AN2251 |
| 1905 | CONTIG36 | 88958 | 89302 | 1.41 | 8.01E-02 | transcription_start_site | + | 90100 | 90100 | -970  | 11829 | AN2251 |
| 1905 | CONTIG36 | 88958 | 89302 | 1.41 | 8.01E-02 | transcription_start_site | + | 90238 | 90238 | -1108 | 11830 | AN2251 |
| 1905 | CONTIG36 | 88958 | 89302 | 1.41 | 8.01E-02 | transcription_start_site | + | 90413 | 90413 | -1283 | 11831 | AN2251 |
| 1905 | CONTIG36 | 88958 | 89302 | 1.41 | 8.01E-02 | transcription_start_site | + | 90812 | 90812 | -1682 | 11832 | AN2251 |
| 1905 | CONTIG36 | 88958 | 89302 | 1.41 | 8.01E-02 | transcription_start_site | + | 94106 | 94106 | -4976 | 11838 | AN2254 |
| 1905 | CONTIG36 | 88958 | 89302 | 1.41 | 8.01E-02 | transcription_start_site | + | 94174 | 94174 | -5044 | 11839 | AN2254 |
| 22   | CONTIG37 | 37817 | 38686 | 3.6  | 0.00E+00 | transcription_start_site | - | 33205 | 33205 | -5046 | 11867 | AN2264 |
| 22   | CONTIG37 | 37817 | 38686 | 3.6  | 0.00E+00 | transcription_start_site | - | 36317 | 36317 | -1934 | 11875 | AN2265 |
| 1060 | CONTIG37 | 53492 | 53774 | 1.86 | 1.11E-02 | transcription_start_site | - | 52776 | 52776 | -857  | 11887 | AN2269 |
| 1060 | CONTIG37 | 53492 | 53774 | 1.86 | 1.11E-02 | transcription_start_site | - | 52543 | 52543 | -1090 | 11888 | AN2269 |
| 1060 | CONTIG37 | 53492 | 53774 | 1.86 | 1.11E-02 | transcription_start_site | - | 52416 | 52416 | -1217 | 11889 | AN2269 |
| 1060 | CONTIG37 | 53492 | 53774 | 1.86 | 1.11E-02 | transcription_start_site | - | 52215 | 52215 | -1418 | 11890 | AN2269 |
| 1060 | CONTIG37 | 53492 | 53774 | 1.86 | 1.11E-02 | transcription_start_site | + | 55075 | 55075 | -1442 | 11891 | AN2270 |
| 1060 | CONTIG37 | 53492 | 53774 | 1.86 | 1.11E-02 | transcription_start_site | + | 55274 | 55274 | -1641 | 11892 | AN2270 |
| 1060 | CONTIG37 | 53492 | 53774 | 1.86 | 1.11E-02 | transcription_start_site | + | 55398 | 55398 | -1765 | 11893 | AN2270 |
| 1000 | CONTIG37 | 73508 | 73782 | 1.91 | 8.81E-03 | transcription_start_site | - | 68933 | 68933 | -4712 | 11911 | AN2274 |
| 1000 | CONTIG37 | 73508 | 73782 | 1.91 | 8.81E-03 | transcription_start_site | - | 68623 | 68623 | -5022 | 11912 | AN2274 |
| 1000 | CONTIG37 | 73508 | 73782 | 1.91 | 8.81E-03 | transcription_start_site | + | 74426 | 74426 | -781  | 11921 | AN2277 |
| 1000 | CONTIG37 | 73508 | 73782 | 1.91 | 8.81E-03 | transcription_start_site | + | 74616 | 74616 | -971  | 11922 | AN2277 |
| 1000 | CONTIG37 | 73508 | 73782 | 1.91 | 8.81E-03 | transcription_start_site | + | 74840 | 74840 | -1195 | 11923 | AN2277 |
| 1000 | CONTIG37 | 73508 | 73782 | 1.91 | 8.81E-03 | transcription_start_site | + | 75011 | 75011 | -1366 | 11924 | AN2277 |
| 1052 | CONTIG38 | 1511  | 1851  | 1.86 | 3.61E-03 | transcription_start_site | + | 2093  | 2093  | -412  | 11925 | AN2278 |
| 1052 | CONTIG38 | 1511  | 1851  | 1.86 | 3.61E-03 | transcription_start_site | + | 2334  | 2334  | -653  | 11926 | AN2278 |
| 1052 | CONTIG38 | 1511  | 1851  | 1.86 | 3.61E-03 | transcription_start_site | + | 2603  | 2603  | -922  | 11927 | AN2278 |
| 1052 | CONTIG38 | 1511  | 1851  | 1.86 | 3.61E-03 | transcription_start_site | + | 6372  | 6372  | -4691 | 11928 | AN2278 |
| 1053 | CONTIG38 | 9687  | 10029 | 1.86 | 3.61E-03 | transcription_start_site | - | 9640  | 9640  | -218  | 11935 | AN2280 |
| 1053 | CONTIG38 | 9687  | 10029 | 1.86 | 3.61E-03 | transcription_start_site | - | 9483  | 9483  | -375  | 11936 | AN2280 |
| 1053 | CONTIG38 | 9687  | 10029 | 1.86 | 3.61E-03 | transcription_start_site | - | 9091  | 9091  | -767  | 11937 | AN2280 |
| 1631 | CONTIG38 | 12832 | 13716 | 1.52 | 3.45E-03 | transcription_start_site | - | 9640  | 9640  | -3634 | 11935 | AN2280 |
| 1631 | CONTIG38 | 12832 | 13716 | 1.52 | 3.45E-03 | transcription_start_site | - | 9483  | 9483  | -3791 | 11936 | AN2280 |
| 1631 | CONTIG38 | 12832 | 13716 | 1.52 | 3.45E-03 | transcription_start_site | - | 9091  | 9091  | -4183 | 11937 | AN2280 |
| 1053 | CONTIG38 | 9687  | 10029 | 1.86 | 3.61E-03 | transcription_start_site | + | 10587 | 10587 | -729  | 11938 | AN2281 |
| 1053 | CONTIG38 | 9687  | 10029 | 1.86 | 3.61E-03 | transcription_start_site | + | 10822 | 10822 | -964  | 11939 | AN2281 |
| 1053 | CONTIG38 | 9687  | 10029 | 1.86 | 3.61E-03 | transcription_start_site | + | 11301 | 11301 | -1443 | 11940 | AN2281 |
| 1053 | CONTIG38 | 9687  | 10029 | 1.86 | 3.61E-03 | transcription_start_site | + | 11755 | 11755 | -1897 | 11941 | AN2281 |



|      |          |       |       |      |          |                          |   |       |       |       |       |        |
|------|----------|-------|-------|------|----------|--------------------------|---|-------|-------|-------|-------|--------|
| 1053 | CONTIG38 | 9687  | 10029 | 1.86 | 3.61E-03 | transcription_start_site | + | 13477 | 13477 | -3619 | 11942 | AN2282 |
| 1053 | CONTIG38 | 9687  | 10029 | 1.86 | 3.61E-03 | transcription_start_site | + | 13539 | 13539 | -3681 | 11943 | AN2282 |
| 1053 | CONTIG38 | 9687  | 10029 | 1.86 | 3.61E-03 | transcription_start_site | + | 13804 | 13804 | -3946 | 11944 | AN2282 |
| 1053 | CONTIG38 | 9687  | 10029 | 1.86 | 3.61E-03 | transcription_start_site | + | 14016 | 14016 | -4158 | 11945 | AN2282 |
| 1053 | CONTIG38 | 9687  | 10029 | 1.86 | 3.61E-03 | transcription_start_site | + | 14161 | 14161 | -4303 | 11946 | AN2282 |
| 1053 | CONTIG38 | 9687  | 10029 | 1.86 | 3.61E-03 | transcription_start_site | + | 14245 | 14245 | -4387 | 11947 | AN2282 |
| 1053 | CONTIG38 | 9687  | 10029 | 1.86 | 3.61E-03 | transcription_start_site | + | 14660 | 14660 | -4802 | 11948 | AN2282 |
| 1053 | CONTIG38 | 9687  | 10029 | 1.86 | 3.61E-03 | transcription_start_site | + | 14772 | 14772 | -4914 | 11949 | AN2282 |
| 1053 | CONTIG38 | 9687  | 10029 | 1.86 | 3.61E-03 | transcription_start_site | + | 14870 | 14870 | -5012 | 11950 | AN2282 |
| 1631 | CONTIG38 | 12832 | 13716 | 1.52 | 3.45E-03 | transcription_start_site | + | 13477 | 13477 | -203  | 11942 | AN2282 |
| 1631 | CONTIG38 | 12832 | 13716 | 1.52 | 3.45E-03 | transcription_start_site | + | 13539 | 13539 | -265  | 11943 | AN2282 |
| 1631 | CONTIG38 | 12832 | 13716 | 1.52 | 3.45E-03 | transcription_start_site | + | 13804 | 13804 | -530  | 11944 | AN2282 |
| 1631 | CONTIG38 | 12832 | 13716 | 1.52 | 3.45E-03 | transcription_start_site | + | 14016 | 14016 | -742  | 11945 | AN2282 |
| 1631 | CONTIG38 | 12832 | 13716 | 1.52 | 3.45E-03 | transcription_start_site | + | 14161 | 14161 | -887  | 11946 | AN2282 |
| 1631 | CONTIG38 | 12832 | 13716 | 1.52 | 3.45E-03 | transcription_start_site | + | 14245 | 14245 | -971  | 11947 | AN2282 |
| 1631 | CONTIG38 | 12832 | 13716 | 1.52 | 3.45E-03 | transcription_start_site | + | 14660 | 14660 | -1386 | 11948 | AN2282 |
| 1631 | CONTIG38 | 12832 | 13716 | 1.52 | 3.45E-03 | transcription_start_site | + | 14772 | 14772 | -1498 | 11949 | AN2282 |
| 1631 | CONTIG38 | 12832 | 13716 | 1.52 | 3.45E-03 | transcription_start_site | + | 14870 | 14870 | -1596 | 11950 | AN2282 |
| 1631 | CONTIG38 | 12832 | 13716 | 1.52 | 3.45E-03 | transcription_start_site | + | 15237 | 15237 | -1963 | 11951 | AN2282 |
| 1544 | CONTIG38 | 17562 | 17911 | 1.56 | 1.57E-02 | transcription_start_site | + | 17399 | 17399 | 337   | 11954 | AN2283 |
| 1544 | CONTIG38 | 17562 | 17911 | 1.56 | 1.57E-02 | transcription_start_site | + | 17007 | 17007 | 729   | 11953 | AN2283 |
| 1544 | CONTIG38 | 17562 | 17911 | 1.56 | 1.57E-02 | transcription_start_site | + | 16791 | 16791 | 945   | 11952 | AN2283 |
| 1631 | CONTIG38 | 12832 | 13716 | 1.52 | 3.45E-03 | transcription_start_site | + | 16791 | 16791 | -3517 | 11952 | AN2283 |
| 1631 | CONTIG38 | 12832 | 13716 | 1.52 | 3.45E-03 | transcription_start_site | + | 17007 | 17007 | -3733 | 11953 | AN2283 |
| 1631 | CONTIG38 | 12832 | 13716 | 1.52 | 3.45E-03 | transcription_start_site | + | 17399 | 17399 | -4125 | 11954 | AN2283 |
| 2212 | CONTIG38 | 20777 | 21217 | 1.29 | 5.22E-02 | transcription_start_site | - | 20852 | 20852 | -145  | 11955 | AN2284 |
| 2212 | CONTIG38 | 20777 | 21217 | 1.29 | 5.22E-02 | transcription_start_site | - | 20433 | 20433 | -564  | 11956 | AN2284 |
| 1266 | CONTIG38 | 30396 | 30660 | 1.71 | 7.85E-03 | transcription_start_site | - | 27019 | 27019 | -3509 | 11957 | AN2285 |
| 1266 | CONTIG38 | 30396 | 30660 | 1.71 | 7.85E-03 | transcription_start_site | - | 26416 | 26416 | -4112 | 11958 | AN2285 |
| 1266 | CONTIG38 | 30396 | 30660 | 1.71 | 7.85E-03 | transcription_start_site | - | 25855 | 25855 | -4673 | 11959 | AN2285 |
| 1740 | CONTIG38 | 26871 | 27205 | 1.48 | 2.12E-02 | transcription_start_site | - | 27019 | 27019 | -19   | 11957 | AN2285 |
| 1740 | CONTIG38 | 26871 | 27205 | 1.48 | 2.12E-02 | transcription_start_site | - | 26416 | 26416 | -622  | 11958 | AN2285 |
| 1740 | CONTIG38 | 26871 | 27205 | 1.48 | 2.12E-02 | transcription_start_site | - | 25855 | 25855 | -1183 | 11959 | AN2285 |
| 1740 | CONTIG38 | 26871 | 27205 | 1.48 | 2.12E-02 | transcription_start_site | - | 23349 | 23349 | -3689 | 11960 | AN2285 |
| 1740 | CONTIG38 | 26871 | 27205 | 1.48 | 2.12E-02 | transcription_start_site | - | 22027 | 22027 | -5011 | 11961 | AN2285 |
| 2212 | CONTIG38 | 20777 | 21217 | 1.29 | 5.22E-02 | transcription_start_site | - | 22027 | 22027 | 1030  | 11961 | AN2285 |
| 1266 | CONTIG38 | 30396 | 30660 | 1.71 | 7.85E-03 | transcription_start_site | - | 30070 | 30070 | -458  | 11962 | AN2286 |
| 1266 | CONTIG38 | 30396 | 30660 | 1.71 | 7.85E-03 | transcription_start_site | - | 29340 | 29340 | -1188 | 11963 | AN2286 |
| 1266 | CONTIG38 | 30396 | 30660 | 1.71 | 7.85E-03 | transcription_start_site | - | 28917 | 28917 | -1611 | 11964 | AN2286 |
| 1266 | CONTIG38 | 30396 | 30660 | 1.71 | 7.85E-03 | transcription_start_site | - | 31025 | 31025 | 497   | 11974 | AN2287 |
| 1266 | CONTIG38 | 30396 | 30660 | 1.71 | 7.85E-03 | transcription_start_site | - | 31399 | 31399 | 871   | 11973 | AN2287 |
| 1267 | CONTIG38 | 43205 | 43491 | 1.71 | 7.85E-03 | transcription_start_site | - | 39015 | 39015 | -4333 | 11980 | AN2289 |
| 1267 | CONTIG38 | 43205 | 43491 | 1.71 | 7.85E-03 | transcription_start_site | - | 38747 | 38747 | -4601 | 11981 | AN2289 |
| 1267 | CONTIG38 | 43205 | 43491 | 1.71 | 7.85E-03 | transcription_start_site | - | 38654 | 38654 | -4694 | 11982 | AN2289 |
| 1267 | CONTIG38 | 43205 | 43491 | 1.71 | 7.85E-03 | transcription_start_site | - | 38283 | 38283 | -5065 | 11983 | AN2289 |
| 1267 | CONTIG38 | 43205 | 43491 | 1.71 | 7.85E-03 | transcription_start_site | - | 42443 | 42443 | -905  | 11984 | AN2290 |
| 1267 | CONTIG38 | 43205 | 43491 | 1.71 | 7.85E-03 | transcription_start_site | - | 42268 | 42268 | -1080 | 11985 | AN2290 |
| 1267 | CONTIG38 | 43205 | 43491 | 1.71 | 7.85E-03 | transcription_start_site | - | 42111 | 42111 | -1237 | 11986 | AN2290 |
| 1267 | CONTIG38 | 43205 | 43491 | 1.71 | 7.85E-03 | transcription_start_site | - | 40485 | 40485 | -2863 | 11987 | AN2290 |
| 1267 | CONTIG38 | 43205 | 43491 | 1.71 | 7.85E-03 | transcription_start_site | - | 40347 | 40347 | -3001 | 11988 | AN2290 |
| 1323 | CONTIG38 | 74942 | 75276 | 1.67 | 8.81E-03 | transcription_start_site | - | 74196 | 74196 | -913  | 12018 | AN2300 |
| 1323 | CONTIG38 | 74942 | 75276 | 1.67 | 8.81E-03 | transcription_start_site | - | 73721 | 73721 | -1388 | 12019 | AN2300 |
| 1323 | CONTIG38 | 74942 | 75276 | 1.67 | 8.81E-03 | transcription_start_site | - | 70399 | 70399 | -4710 | 12020 | AN2300 |
| 1323 | CONTIG38 | 74942 | 75276 | 1.67 | 8.81E-03 | transcription_start_site | + | 77018 | 77018 | -1909 | 12021 | AN2301 |
| 1323 | CONTIG38 | 74942 | 75276 | 1.67 | 8.81E-03 | transcription_start_site | + | 77160 | 77160 | -2051 | 12022 | AN2301 |
| 1323 | CONTIG38 | 74942 | 75276 | 1.67 | 8.81E-03 | transcription_start_site | + | 77529 | 77529 | -2420 | 12023 | AN2301 |
| 2740 | CONTIG38 | 83861 | 84220 | 1.1  | 1.08E-01 | transcription_start_site | - | 79519 | 79519 | -4521 | 12024 | AN2302 |

|      |          |        |        |      |          |                          |   |        |        |       |       |        |
|------|----------|--------|--------|------|----------|--------------------------|---|--------|--------|-------|-------|--------|
| 2740 | CONTIG38 | 83861  | 84220  | 1.1  | 1.08E-01 | transcription_start_site | - | 79396  | 79396  | -4644 | 12025 | AN2302 |
| 2740 | CONTIG38 | 83861  | 84220  | 1.1  | 1.08E-01 | transcription_start_site | - | 79250  | 79250  | -4790 | 12026 | AN2302 |
| 2740 | CONTIG38 | 83861  | 84220  | 1.1  | 1.08E-01 | transcription_start_site | - | 79021  | 79021  | -5019 | 12027 | AN2302 |
| 2740 | CONTIG38 | 83861  | 84220  | 1.1  | 1.08E-01 | transcription_start_site | - | 83900  | 83900  | -140  | 12038 | AN2304 |
| 2740 | CONTIG38 | 83861  | 84220  | 1.1  | 1.08E-01 | transcription_start_site | - | 84290  | 84290  | 249   | 12037 | AN2304 |
| 2740 | CONTIG38 | 83861  | 84220  | 1.1  | 1.08E-01 | transcription_start_site | - | 84427  | 84427  | 386   | 12036 | AN2304 |
| 2740 | CONTIG38 | 83861  | 84220  | 1.1  | 1.08E-01 | transcription_start_site | - | 84564  | 84564  | 523   | 12035 | AN2304 |
| 2740 | CONTIG38 | 83861  | 84220  | 1.1  | 1.08E-01 | transcription_start_site | - | 84671  | 84671  | 630   | 12034 | AN2304 |
| 2740 | CONTIG38 | 83861  | 84220  | 1.1  | 1.08E-01 | transcription_start_site | - | 83406  | 83406  | -634  | 12039 | AN2304 |
| 2740 | CONTIG38 | 83861  | 84220  | 1.1  | 1.08E-01 | transcription_start_site | - | 84757  | 84757  | 716   | 12033 | AN2304 |
| 2740 | CONTIG38 | 83861  | 84220  | 1.1  | 1.08E-01 | transcription_start_site | + | 86679  | 86679  | -2638 | 12040 | AN2305 |
| 2740 | CONTIG38 | 83861  | 84220  | 1.1  | 1.08E-01 | transcription_start_site | + | 86791  | 86791  | -2750 | 12041 | AN2305 |
| 2790 | CONTIG38 | 95412  | 96066  | 1.07 | 1.07E-01 | transcription_start_site | - | 90848  | 90848  | -4891 | 12042 | AN2306 |
| 2790 | CONTIG38 | 95412  | 96066  | 1.07 | 1.07E-01 | transcription_start_site | - | 90446  | 90446  | -5293 | 12043 | AN2306 |
| 2969 | CONTIG38 | 90677  | 90961  | 0.95 | 1.93E-01 | transcription_start_site | - | 90848  | 90848  | 29    | 12042 | AN2306 |
| 2969 | CONTIG38 | 90677  | 90961  | 0.95 | 1.93E-01 | transcription_start_site | - | 90446  | 90446  | -373  | 12043 | AN2306 |
| 2969 | CONTIG38 | 90677  | 90961  | 0.95 | 1.93E-01 | transcription_start_site | - | 90283  | 90283  | -536  | 12044 | AN2306 |
| 2969 | CONTIG38 | 90677  | 90961  | 0.95 | 1.93E-01 | transcription_start_site | - | 90075  | 90075  | -744  | 12045 | AN2306 |
| 2790 | CONTIG38 | 95412  | 96066  | 1.07 | 1.07E-01 | transcription_start_site | - | 91851  | 91851  | -3888 | 12046 | AN2307 |
| 2790 | CONTIG38 | 95412  | 96066  | 1.07 | 1.07E-01 | transcription_start_site | - | 91600  | 91600  | -4139 | 12047 | AN2307 |
| 2969 | CONTIG38 | 90677  | 90961  | 0.95 | 1.93E-01 | transcription_start_site | - | 91600  | 91600  | 781   | 12047 | AN2307 |
| 2969 | CONTIG38 | 90677  | 90961  | 0.95 | 1.93E-01 | transcription_start_site | - | 91851  | 91851  | 1032  | 12046 | AN2307 |
| 2790 | CONTIG38 | 95412  | 96066  | 1.07 | 1.07E-01 | transcription_start_site | + | 94442  | 94442  | 1297  | 12054 | AN2308 |
| 2969 | CONTIG38 | 90677  | 90961  | 0.95 | 1.93E-01 | transcription_start_site | + | 92405  | 92405  | -1586 | 12048 | AN2308 |
| 2969 | CONTIG38 | 90677  | 90961  | 0.95 | 1.93E-01 | transcription_start_site | + | 92472  | 92472  | -1653 | 12049 | AN2308 |
| 2969 | CONTIG38 | 90677  | 90961  | 0.95 | 1.93E-01 | transcription_start_site | + | 93160  | 93160  | -2341 | 12050 | AN2308 |
| 2969 | CONTIG38 | 90677  | 90961  | 0.95 | 1.93E-01 | transcription_start_site | + | 93549  | 93549  | -2730 | 12051 | AN2308 |
| 2969 | CONTIG38 | 90677  | 90961  | 0.95 | 1.93E-01 | transcription_start_site | + | 93674  | 93674  | -2855 | 12052 | AN2308 |
| 2969 | CONTIG38 | 90677  | 90961  | 0.95 | 1.93E-01 | transcription_start_site | + | 94043  | 94043  | -3224 | 12053 | AN2308 |
| 2969 | CONTIG38 | 90677  | 90961  | 0.95 | 1.93E-01 | transcription_start_site | + | 94442  | 94442  | -3623 | 12054 | AN2308 |
| 1805 | CONTIG38 | 97132  | 97420  | 1.45 | 2.62E-02 | transcription_start_site | - | 96047  | 96047  | -1229 | 12055 | AN2309 |
| 1805 | CONTIG38 | 97132  | 97420  | 1.45 | 2.62E-02 | transcription_start_site | - | 95878  | 95878  | -1398 | 12056 | AN2309 |
| 1805 | CONTIG38 | 97132  | 97420  | 1.45 | 2.62E-02 | transcription_start_site | - | 95692  | 95692  | -1584 | 12057 | AN2309 |
| 2790 | CONTIG38 | 95412  | 96066  | 1.07 | 1.07E-01 | transcription_start_site | - | 95692  | 95692  | -47   | 12057 | AN2309 |
| 2790 | CONTIG38 | 95412  | 96066  | 1.07 | 1.07E-01 | transcription_start_site | - | 95878  | 95878  | 139   | 12056 | AN2309 |
| 2790 | CONTIG38 | 95412  | 96066  | 1.07 | 1.07E-01 | transcription_start_site | - | 96047  | 96047  | 308   | 12055 | AN2309 |
| 428  | CONTIG38 | 102527 | 102806 | 2.55 | 0.00E+00 | transcription_start_site | + | 103767 | 103767 | -1100 | 12058 | AN2311 |
| 428  | CONTIG38 | 102527 | 102806 | 2.55 | 0.00E+00 | transcription_start_site | + | 104118 | 104118 | -1451 | 12059 | AN2311 |
| 428  | CONTIG38 | 102527 | 102806 | 2.55 | 0.00E+00 | transcription_start_site | + | 105504 | 105504 | -2837 | 12060 | AN2311 |
| 2103 | CONTIG38 | 101417 | 101676 | 1.33 | 4.36E-02 | transcription_start_site | + | 103767 | 103767 | -2220 | 12058 | AN2311 |
| 2103 | CONTIG38 | 101417 | 101676 | 1.33 | 4.36E-02 | transcription_start_site | + | 104118 | 104118 | -2571 | 12059 | AN2311 |
| 2103 | CONTIG38 | 101417 | 101676 | 1.33 | 4.36E-02 | transcription_start_site | + | 105504 | 105504 | -3957 | 12060 | AN2311 |
| 428  | CONTIG38 | 102527 | 102806 | 2.55 | 0.00E+00 | transcription_start_site | + | 107128 | 107128 | -4461 | 12061 | AN2312 |
| 428  | CONTIG38 | 102527 | 102806 | 2.55 | 0.00E+00 | transcription_start_site | + | 107235 | 107235 | -4568 | 12062 | AN2312 |
| 1992 | CONTIG38 | 117155 | 118254 | 1.37 | 2.18E-02 | transcription_start_site | - | 117681 | 117681 | -23   | 12073 | AN2315 |
| 1992 | CONTIG38 | 117155 | 118254 | 1.37 | 2.18E-02 | transcription_start_site | - | 117599 | 117599 | -105  | 12074 | AN2315 |
| 1992 | CONTIG38 | 117155 | 118254 | 1.37 | 2.18E-02 | transcription_start_site | - | 117290 | 117290 | -414  | 12075 | AN2315 |
| 1992 | CONTIG38 | 117155 | 118254 | 1.37 | 2.18E-02 | transcription_start_site | - | 117140 | 117140 | -564  | 12076 | AN2315 |
| 1992 | CONTIG38 | 117155 | 118254 | 1.37 | 2.18E-02 | transcription_start_site | - | 117018 | 117018 | -686  | 12077 | AN2315 |
| 1992 | CONTIG38 | 117155 | 118254 | 1.37 | 2.18E-02 | transcription_start_site | - | 116651 | 116651 | -1053 | 12078 | AN2315 |
| 1992 | CONTIG38 | 117155 | 118254 | 1.37 | 2.18E-02 | transcription_start_site | - | 115747 | 115747 | -1957 | 12079 | AN2315 |
| 1992 | CONTIG38 | 117155 | 118254 | 1.37 | 2.18E-02 | transcription_start_site | - | 118968 | 118968 | 1263  | 12082 | AN2316 |
| 1992 | CONTIG38 | 117155 | 118254 | 1.37 | 2.18E-02 | transcription_start_site | - | 119254 | 119254 | 1549  | 12081 | AN2316 |
| 2868 | CONTIG38 | 137712 | 138216 | 1.03 | 1.44E-01 | transcription_start_site | - | 132722 | 132722 | -5242 | 12093 | AN2320 |
| 2868 | CONTIG38 | 137712 | 138216 | 1.03 | 1.44E-01 | transcription_start_site | - | 134823 | 134823 | -3141 | 12097 | AN2321 |
| 2868 | CONTIG38 | 137712 | 138216 | 1.03 | 1.44E-01 | transcription_start_site | - | 134603 | 134603 | -3361 | 12098 | AN2321 |
| 2868 | CONTIG38 | 137712 | 138216 | 1.03 | 1.44E-01 | transcription_start_site | - | 134267 | 134267 | -3697 | 12099 | AN2321 |

|      |          |        |        |      |          |                          |   |        |        |       |       |        |
|------|----------|--------|--------|------|----------|--------------------------|---|--------|--------|-------|-------|--------|
| 2868 | CONTIG38 | 137712 | 138216 | 1.03 | 1.44E-01 | transcription_start_site | - | 137707 | 137707 | -257  | 12101 | AN2322 |
| 2868 | CONTIG38 | 137712 | 138216 | 1.03 | 1.44E-01 | transcription_start_site | - | 138427 | 138427 | 463   | 12100 | AN2322 |
| 2868 | CONTIG38 | 137712 | 138216 | 1.03 | 1.44E-01 | transcription_start_site | + | 142280 | 142280 | -4316 | 12104 | AN2324 |
| 2868 | CONTIG38 | 137712 | 138216 | 1.03 | 1.44E-01 | transcription_start_site | + | 142413 | 142413 | -4449 | 12105 | AN2324 |
| 2868 | CONTIG38 | 137712 | 138216 | 1.03 | 1.44E-01 | transcription_start_site | + | 142543 | 142543 | -4579 | 12106 | AN2324 |
| 2923 | CONTIG38 | 157365 | 157709 | 0.99 | 1.66E-01 | transcription_start_site | - | 157547 | 157547 | 10    | 12124 | AN2328 |
| 2317 | CONTIG38 | 169070 | 169404 | 1.26 | 5.88E-02 | transcription_start_site | - | 167229 | 167229 | -2008 | 12127 | AN2331 |
| 2317 | CONTIG38 | 169070 | 169404 | 1.26 | 5.88E-02 | transcription_start_site | - | 166959 | 166959 | -2278 | 12128 | AN2331 |
| 2317 | CONTIG38 | 169070 | 169404 | 1.26 | 5.88E-02 | transcription_start_site | - | 166618 | 166618 | -2619 | 12129 | AN2331 |
| 2317 | CONTIG38 | 169070 | 169404 | 1.26 | 5.88E-02 | transcription_start_site | - | 166481 | 166481 | -2756 | 12130 | AN2331 |
| 2317 | CONTIG38 | 169070 | 169404 | 1.26 | 5.88E-02 | transcription_start_site | - | 166154 | 166154 | -3083 | 12131 | AN2331 |
| 2922 | CONTIG38 | 169505 | 170154 | 0.99 | 1.50E-01 | transcription_start_site | - | 167229 | 167229 | -2600 | 12127 | AN2331 |
| 2922 | CONTIG38 | 169505 | 170154 | 0.99 | 1.50E-01 | transcription_start_site | - | 166959 | 166959 | -2870 | 12128 | AN2331 |
| 2922 | CONTIG38 | 169505 | 170154 | 0.99 | 1.50E-01 | transcription_start_site | - | 166618 | 166618 | -3211 | 12129 | AN2331 |
| 2922 | CONTIG38 | 169505 | 170154 | 0.99 | 1.50E-01 | transcription_start_site | - | 166481 | 166481 | -3348 | 12130 | AN2331 |
| 2922 | CONTIG38 | 169505 | 170154 | 0.99 | 1.50E-01 | transcription_start_site | - | 166154 | 166154 | -3675 | 12131 | AN2331 |
| 2317 | CONTIG38 | 169070 | 169404 | 1.26 | 5.88E-02 | transcription_start_site | + | 169244 | 169244 | -7    | 12132 | AN2332 |
| 2317 | CONTIG38 | 169070 | 169404 | 1.26 | 5.88E-02 | transcription_start_site | + | 169403 | 169403 | -166  | 12133 | AN2332 |
| 2317 | CONTIG38 | 169070 | 169404 | 1.26 | 5.88E-02 | transcription_start_site | + | 169705 | 169705 | -468  | 12134 | AN2332 |
| 2317 | CONTIG38 | 169070 | 169404 | 1.26 | 5.88E-02 | transcription_start_site | + | 169905 | 169905 | -668  | 12135 | AN2332 |
| 2922 | CONTIG38 | 169505 | 170154 | 0.99 | 1.50E-01 | transcription_start_site | + | 169905 | 169905 | -75   | 12135 | AN2332 |
| 2922 | CONTIG38 | 169505 | 170154 | 0.99 | 1.50E-01 | transcription_start_site | + | 169705 | 169705 | 124   | 12134 | AN2332 |
| 2922 | CONTIG38 | 169505 | 170154 | 0.99 | 1.50E-01 | transcription_start_site | + | 169403 | 169403 | 426   | 12133 | AN2332 |
| 2922 | CONTIG38 | 169505 | 170154 | 0.99 | 1.50E-01 | transcription_start_site | + | 169244 | 169244 | 585   | 12132 | AN2332 |
| 2922 | CONTIG38 | 169505 | 170154 | 0.99 | 1.50E-01 | transcription_start_site | - | 170743 | 170743 | 913   | 12139 | AN2333 |
| 1104 | CONTIG38 | 179028 | 179302 | 1.83 | 4.61E-03 | transcription_start_site | - | 176919 | 176919 | -2246 | 12140 | AN2334 |
| 1634 | CONTIG38 | 181893 | 182152 | 1.52 | 1.84E-02 | transcription_start_site | - | 176919 | 176919 | -5103 | 12140 | AN2334 |
| 2558 | CONTIG38 | 180528 | 180952 | 1.18 | 8.01E-02 | transcription_start_site | - | 176919 | 176919 | -3821 | 12140 | AN2334 |
| 2967 | CONTIG38 | 177618 | 178402 | 0.95 | 1.79E-01 | transcription_start_site | - | 176919 | 176919 | -1091 | 12140 | AN2334 |
| 1104 | CONTIG38 | 179028 | 179302 | 1.83 | 4.61E-03 | transcription_start_site | - | 179033 | 179033 | -132  | 12141 | AN2335 |
| 1104 | CONTIG38 | 179028 | 179302 | 1.83 | 4.61E-03 | transcription_start_site | - | 178668 | 178668 | -497  | 12142 | AN2335 |
| 1104 | CONTIG38 | 179028 | 179302 | 1.83 | 4.61E-03 | transcription_start_site | - | 178110 | 178110 | -1055 | 12143 | AN2335 |
| 1634 | CONTIG38 | 181893 | 182152 | 1.52 | 1.84E-02 | transcription_start_site | - | 179033 | 179033 | -2989 | 12141 | AN2335 |
| 1634 | CONTIG38 | 181893 | 182152 | 1.52 | 1.84E-02 | transcription_start_site | - | 178668 | 178668 | -3354 | 12142 | AN2335 |
| 1634 | CONTIG38 | 181893 | 182152 | 1.52 | 1.84E-02 | transcription_start_site | - | 178110 | 178110 | -3912 | 12143 | AN2335 |
| 2558 | CONTIG38 | 180528 | 180952 | 1.18 | 8.01E-02 | transcription_start_site | - | 179033 | 179033 | -1707 | 12141 | AN2335 |
| 2558 | CONTIG38 | 180528 | 180952 | 1.18 | 8.01E-02 | transcription_start_site | - | 178668 | 178668 | -2072 | 12142 | AN2335 |
| 2558 | CONTIG38 | 180528 | 180952 | 1.18 | 8.01E-02 | transcription_start_site | - | 178110 | 178110 | -2630 | 12143 | AN2335 |
| 2967 | CONTIG38 | 177618 | 178402 | 0.95 | 1.79E-01 | transcription_start_site | - | 178110 | 178110 | 100   | 12143 | AN2335 |
| 2967 | CONTIG38 | 177618 | 178402 | 0.95 | 1.79E-01 | transcription_start_site | - | 178668 | 178668 | 658   | 12142 | AN2335 |
| 2967 | CONTIG38 | 177618 | 178402 | 0.95 | 1.79E-01 | transcription_start_site | - | 179033 | 179033 | 1023  | 12141 | AN2335 |
| 1634 | CONTIG38 | 181893 | 182152 | 1.52 | 1.84E-02 | transcription_start_site | - | 181842 | 181842 | -180  | 12144 | AN2336 |
| 1634 | CONTIG38 | 181893 | 182152 | 1.52 | 1.84E-02 | transcription_start_site | - | 181231 | 181231 | -791  | 12145 | AN2336 |
| 2558 | CONTIG38 | 180528 | 180952 | 1.18 | 8.01E-02 | transcription_start_site | - | 181231 | 181231 | 491   | 12145 | AN2336 |
| 2558 | CONTIG38 | 180528 | 180952 | 1.18 | 8.01E-02 | transcription_start_site | - | 181842 | 181842 | 1102  | 12144 | AN2336 |
| 1634 | CONTIG38 | 181893 | 182152 | 1.52 | 1.84E-02 | transcription_start_site | + | 185784 | 185784 | -3761 | 12146 | AN2337 |
| 1634 | CONTIG38 | 181893 | 182152 | 1.52 | 1.84E-02 | transcription_start_site | + | 185874 | 185874 | -3851 | 12147 | AN2337 |
| 1634 | CONTIG38 | 181893 | 182152 | 1.52 | 1.84E-02 | transcription_start_site | + | 186269 | 186269 | -4246 | 12148 | AN2337 |
| 2558 | CONTIG38 | 180528 | 180952 | 1.18 | 8.01E-02 | transcription_start_site | + | 185784 | 185784 | -5044 | 12146 | AN2337 |
| 2558 | CONTIG38 | 180528 | 180952 | 1.18 | 8.01E-02 | transcription_start_site | + | 185874 | 185874 | -5134 | 12147 | AN2337 |
| 1268 | CONTIG38 | 187808 | 188167 | 1.71 | 7.85E-03 | transcription_start_site | - | 187828 | 187828 | -159  | 12149 | AN2338 |
| 1545 | CONTIG38 | 188788 | 189137 | 1.56 | 1.57E-02 | transcription_start_site | - | 187828 | 187828 | -1134 | 12149 | AN2338 |
| 1268 | CONTIG38 | 187808 | 188167 | 1.71 | 7.85E-03 | transcription_start_site | + | 191482 | 191482 | -3494 | 12150 | AN2339 |
| 1268 | CONTIG38 | 187808 | 188167 | 1.71 | 7.85E-03 | transcription_start_site | + | 191762 | 191762 | -3774 | 12151 | AN2339 |
| 1268 | CONTIG38 | 187808 | 188167 | 1.71 | 7.85E-03 | transcription_start_site | + | 192193 | 192193 | -4205 | 12152 | AN2339 |
| 1545 | CONTIG38 | 188788 | 189137 | 1.56 | 1.57E-02 | transcription_start_site | + | 191482 | 191482 | -2519 | 12150 | AN2339 |
| 1545 | CONTIG38 | 188788 | 189137 | 1.56 | 1.57E-02 | transcription_start_site | + | 191762 | 191762 | -2799 | 12151 | AN2339 |

|      |          |        |        |      |          |                          |   |        |        |       |       |        |
|------|----------|--------|--------|------|----------|--------------------------|---|--------|--------|-------|-------|--------|
| 1545 | CONTIG38 | 188788 | 189137 | 1.56 | 1.57E-02 | transcription_start_site | + | 192193 | 192193 | -3230 | 12152 | AN2339 |
| 1894 | CONTIG38 | 203101 | 203530 | 1.41 | 3.08E-02 | transcription_start_site | + | 202156 | 202156 | 1159  | 12155 | AN2342 |
| 1894 | CONTIG38 | 203101 | 203530 | 1.41 | 3.08E-02 | transcription_start_site | - | 203096 | 203096 | -219  | 12156 | AN2343 |
| 1894 | CONTIG38 | 203101 | 203530 | 1.41 | 3.08E-02 | transcription_start_site | - | 202710 | 202710 | -605  | 12157 | AN2343 |
| 1894 | CONTIG38 | 203101 | 203530 | 1.41 | 3.08E-02 | transcription_start_site | - | 202534 | 202534 | -781  | 12158 | AN2343 |
| 1894 | CONTIG38 | 203101 | 203530 | 1.41 | 3.08E-02 | transcription_start_site | + | 206029 | 206029 | -2713 | 12159 | AN2344 |
| 1894 | CONTIG38 | 203101 | 203530 | 1.41 | 3.08E-02 | transcription_start_site | + | 206265 | 206265 | -2949 | 12160 | AN2344 |
| 1894 | CONTIG38 | 203101 | 203530 | 1.41 | 3.08E-02 | transcription_start_site | + | 206345 | 206345 | -3029 | 12161 | AN2344 |
| 2971 | CONTIG38 | 226580 | 227001 | 0.95 | 1.93E-01 | transcription_start_site | + | 226459 | 226459 | 331   | 12169 | AN2348 |
| 2971 | CONTIG38 | 226580 | 227001 | 0.95 | 1.93E-01 | transcription_start_site | + | 228757 | 228757 | -1966 | 12170 | AN2349 |
| 2971 | CONTIG38 | 226580 | 227001 | 0.95 | 1.93E-01 | transcription_start_site | + | 228942 | 228942 | -2151 | 12171 | AN2349 |
| 2971 | CONTIG38 | 226580 | 227001 | 0.95 | 1.93E-01 | transcription_start_site | + | 229176 | 229176 | -2385 | 12172 | AN2349 |
| 2971 | CONTIG38 | 226580 | 227001 | 0.95 | 1.93E-01 | transcription_start_site | + | 229890 | 229890 | -3099 | 12173 | AN2349 |
| 1118 | CONTIG39 | 35929  | 36278  | 1.82 | 3.08E-02 | transcription_start_site | - | 31233  | 31233  | -4870 | 12201 | AN2360 |
| 1118 | CONTIG39 | 35929  | 36278  | 1.82 | 3.08E-02 | transcription_start_site | - | 31050  | 31050  | -5053 | 12202 | AN2360 |
| 1118 | CONTIG39 | 35929  | 36278  | 1.82 | 3.08E-02 | transcription_start_site | - | 32647  | 32647  | -3456 | 12203 | AN2361 |
| 1118 | CONTIG39 | 35929  | 36278  | 1.82 | 3.08E-02 | transcription_start_site | - | 32428  | 32428  | -3675 | 12204 | AN2361 |
| 1118 | CONTIG39 | 35929  | 36278  | 1.82 | 3.08E-02 | transcription_start_site | - | 34743  | 34743  | -1360 | 12205 | AN2362 |
| 1118 | CONTIG39 | 35929  | 36278  | 1.82 | 3.08E-02 | transcription_start_site | - | 34478  | 34478  | -1625 | 12206 | AN2362 |
| 1118 | CONTIG39 | 35929  | 36278  | 1.82 | 3.08E-02 | transcription_start_site | - | 34033  | 34033  | -2070 | 12207 | AN2362 |
| 1118 | CONTIG39 | 35929  | 36278  | 1.82 | 3.08E-02 | transcription_start_site | - | 33864  | 33864  | -2239 | 12208 | AN2362 |
| 1118 | CONTIG39 | 35929  | 36278  | 1.82 | 3.08E-02 | transcription_start_site | - | 33669  | 33669  | -2434 | 12209 | AN2362 |
| 1118 | CONTIG39 | 35929  | 36278  | 1.82 | 3.08E-02 | transcription_start_site | + | 36466  | 36466  | -362  | 12210 | AN2363 |
| 1118 | CONTIG39 | 35929  | 36278  | 1.82 | 3.08E-02 | transcription_start_site | + | 36604  | 36604  | -500  | 12211 | AN2363 |
| 1118 | CONTIG39 | 35929  | 36278  | 1.82 | 3.08E-02 | transcription_start_site | + | 37815  | 37815  | -1711 | 12212 | AN2363 |
| 1118 | CONTIG39 | 35929  | 36278  | 1.82 | 3.08E-02 | transcription_start_site | + | 38583  | 38583  | -2479 | 12213 | AN2363 |
| 1118 | CONTIG39 | 35929  | 36278  | 1.82 | 3.08E-02 | transcription_start_site | + | 39661  | 39661  | -3557 | 12214 | AN2363 |
| 1118 | CONTIG39 | 35929  | 36278  | 1.82 | 3.08E-02 | transcription_start_site | + | 40006  | 40006  | -3902 | 12215 | AN2363 |
| 1118 | CONTIG39 | 35929  | 36278  | 1.82 | 3.08E-02 | transcription_start_site | + | 40171  | 40171  | -4067 | 12216 | AN2363 |
| 78   | CONTIG39 | 49889  | 50468  | 3.3  | 0.00E+00 | transcription_start_site | - | 45846  | 45846  | -4332 | 12219 | AN2365 |
| 78   | CONTIG39 | 49889  | 50468  | 3.3  | 0.00E+00 | transcription_start_site | - | 45244  | 45244  | -4934 | 12220 | AN2365 |
| 78   | CONTIG39 | 49889  | 50468  | 3.3  | 0.00E+00 | transcription_start_site | + | 50426  | 50426  | -247  | 12222 | AN2366 |
| 940  | CONTIG39 | 51089  | 51588  | 1.97 | 1.84E-02 | transcription_start_site | + | 50426  | 50426  | 912   | 12222 | AN2366 |
| 940  | CONTIG39 | 51089  | 51588  | 1.97 | 1.84E-02 | transcription_start_site | - | 52078  | 52078  | 739   | 12225 | AN2367 |
| 2273 | CONTIG39 | 52204  | 52493  | 1.28 | 1.66E-01 | transcription_start_site | - | 52078  | 52078  | -270  | 12225 | AN2367 |
| 2273 | CONTIG39 | 52204  | 52493  | 1.28 | 1.66E-01 | transcription_start_site | - | 52626  | 52626  | 277   | 12224 | AN2367 |
| 2273 | CONTIG39 | 52204  | 52493  | 1.28 | 1.66E-01 | transcription_start_site | - | 52989  | 52989  | 640   | 12223 | AN2367 |
| 78   | CONTIG39 | 49889  | 50468  | 3.3  | 0.00E+00 | transcription_start_site | + | 53717  | 53717  | -3538 | 12226 | AN2368 |
| 78   | CONTIG39 | 49889  | 50468  | 3.3  | 0.00E+00 | transcription_start_site | + | 54018  | 54018  | -3839 | 12227 | AN2368 |
| 78   | CONTIG39 | 49889  | 50468  | 3.3  | 0.00E+00 | transcription_start_site | + | 54463  | 54463  | -4284 | 12228 | AN2368 |
| 78   | CONTIG39 | 49889  | 50468  | 3.3  | 0.00E+00 | transcription_start_site | + | 54541  | 54541  | -4362 | 12229 | AN2368 |
| 78   | CONTIG39 | 49889  | 50468  | 3.3  | 0.00E+00 | transcription_start_site | + | 54881  | 54881  | -4702 | 12230 | AN2368 |
| 940  | CONTIG39 | 51089  | 51588  | 1.97 | 1.84E-02 | transcription_start_site | + | 53717  | 53717  | -2378 | 12226 | AN2368 |
| 940  | CONTIG39 | 51089  | 51588  | 1.97 | 1.84E-02 | transcription_start_site | + | 54018  | 54018  | -2679 | 12227 | AN2368 |
| 940  | CONTIG39 | 51089  | 51588  | 1.97 | 1.84E-02 | transcription_start_site | + | 54463  | 54463  | -3124 | 12228 | AN2368 |
| 940  | CONTIG39 | 51089  | 51588  | 1.97 | 1.84E-02 | transcription_start_site | + | 54541  | 54541  | -3202 | 12229 | AN2368 |
| 940  | CONTIG39 | 51089  | 51588  | 1.97 | 1.84E-02 | transcription_start_site | + | 54881  | 54881  | -3542 | 12230 | AN2368 |
| 2273 | CONTIG39 | 52204  | 52493  | 1.28 | 1.66E-01 | transcription_start_site | + | 53717  | 53717  | -1368 | 12226 | AN2368 |
| 2273 | CONTIG39 | 52204  | 52493  | 1.28 | 1.66E-01 | transcription_start_site | + | 54018  | 54018  | -1669 | 12227 | AN2368 |
| 2273 | CONTIG39 | 52204  | 52493  | 1.28 | 1.66E-01 | transcription_start_site | + | 54463  | 54463  | -2114 | 12228 | AN2368 |
| 2273 | CONTIG39 | 52204  | 52493  | 1.28 | 1.66E-01 | transcription_start_site | + | 54541  | 54541  | -2192 | 12229 | AN2368 |
| 2273 | CONTIG39 | 52204  | 52493  | 1.28 | 1.66E-01 | transcription_start_site | + | 54881  | 54881  | -2532 | 12230 | AN2368 |
| 1319 | CONTIG39 | 92704  | 93503  | 1.68 | 5.22E-02 | transcription_start_site | - | 87960  | 87960  | -5143 | 12271 | AN2380 |
| 1319 | CONTIG39 | 92704  | 93503  | 1.68 | 5.22E-02 | transcription_start_site | - | 89462  | 89462  | -3641 | 12273 | AN2381 |
| 1319 | CONTIG39 | 92704  | 93503  | 1.68 | 5.22E-02 | transcription_start_site | - | 90752  | 90752  | -2351 | 12274 | AN2382 |
| 1319 | CONTIG39 | 92704  | 93503  | 1.68 | 5.22E-02 | transcription_start_site | + | 93356  | 93356  | -252  | 12277 | AN2383 |
| 1319 | CONTIG39 | 92704  | 93503  | 1.68 | 5.22E-02 | transcription_start_site | + | 93544  | 93544  | -440  | 12278 | AN2383 |

|      |          |        |        |      |          |                          |   |        |        |       |       |        |
|------|----------|--------|--------|------|----------|--------------------------|---|--------|--------|-------|-------|--------|
| 1319 | CONTIG39 | 92704  | 93503  | 1.68 | 5.22E-02 | transcription_start_site | + | 92643  | 92643  | 460   | 12276 | AN2383 |
| 1319 | CONTIG39 | 92704  | 93503  | 1.68 | 5.22E-02 | transcription_start_site | + | 92278  | 92278  | 825   | 12275 | AN2383 |
| 1319 | CONTIG39 | 92704  | 93503  | 1.68 | 5.22E-02 | transcription_start_site | + | 94092  | 94092  | -988  | 12279 | AN2383 |
| 1319 | CONTIG39 | 92704  | 93503  | 1.68 | 5.22E-02 | transcription_start_site | + | 95564  | 95564  | -2460 | 12280 | AN2384 |
| 1319 | CONTIG39 | 92704  | 93503  | 1.68 | 5.22E-02 | transcription_start_site | + | 96018  | 96018  | -2914 | 12281 | AN2384 |
| 1319 | CONTIG39 | 92704  | 93503  | 1.68 | 5.22E-02 | transcription_start_site | + | 96387  | 96387  | -3283 | 12282 | AN2384 |
| 1319 | CONTIG39 | 92704  | 93503  | 1.68 | 5.22E-02 | transcription_start_site | + | 97405  | 97405  | -4301 | 12283 | AN2384 |
| 362  | CONTIG39 | 102677 | 103026 | 2.66 | 0.00E+00 | transcription_start_site | - | 101937 | 101937 | -914  | 12284 | AN2385 |
| 1405 | CONTIG39 | 100502 | 101017 | 1.63 | 5.88E-02 | transcription_start_site | - | 101937 | 101937 | 1177  | 12284 | AN2385 |
| 1315 | CONTIG39 | 120376 | 120725 | 1.68 | 3.33E-02 | transcription_start_site | + | 120488 | 120488 | 62    | 12307 | AN2390 |
| 1315 | CONTIG39 | 120376 | 120725 | 1.68 | 3.33E-02 | transcription_start_site | + | 120696 | 120696 | -145  | 12308 | AN2390 |
| 1315 | CONTIG39 | 120376 | 120725 | 1.68 | 3.33E-02 | transcription_start_site | + | 120265 | 120265 | 285   | 12306 | AN2390 |
| 189  | CONTIG39 | 125646 | 126126 | 2.96 | 2.16E-04 | transcription_start_site | - | 125946 | 125946 | 60    | 12309 | AN2391 |
| 189  | CONTIG39 | 125646 | 126126 | 2.96 | 2.16E-04 | transcription_start_site | - | 125673 | 125673 | -213  | 12310 | AN2391 |
| 189  | CONTIG39 | 125646 | 126126 | 2.96 | 2.16E-04 | transcription_start_site | - | 125454 | 125454 | -432  | 12311 | AN2391 |
| 189  | CONTIG39 | 125646 | 126126 | 2.96 | 2.16E-04 | transcription_start_site | - | 123601 | 123601 | -2285 | 12312 | AN2391 |
| 1247 | CONTIG39 | 128496 | 128750 | 1.73 | 4.36E-02 | transcription_start_site | - | 125946 | 125946 | -2677 | 12309 | AN2391 |
| 1247 | CONTIG39 | 128496 | 128750 | 1.73 | 4.36E-02 | transcription_start_site | - | 125673 | 125673 | -2950 | 12310 | AN2391 |
| 1247 | CONTIG39 | 128496 | 128750 | 1.73 | 4.36E-02 | transcription_start_site | - | 125454 | 125454 | -3169 | 12311 | AN2391 |
| 1247 | CONTIG39 | 128496 | 128750 | 1.73 | 4.36E-02 | transcription_start_site | - | 123601 | 123601 | -5022 | 12312 | AN2391 |
| 189  | CONTIG39 | 125646 | 126126 | 2.96 | 2.16E-04 | transcription_start_site | + | 130155 | 130155 | -4269 | 12313 | AN2392 |
| 189  | CONTIG39 | 125646 | 126126 | 2.96 | 2.16E-04 | transcription_start_site | + | 130346 | 130346 | -4460 | 12314 | AN2392 |
| 1247 | CONTIG39 | 128496 | 128750 | 1.73 | 4.36E-02 | transcription_start_site | + | 130155 | 130155 | -1532 | 12313 | AN2392 |
| 1247 | CONTIG39 | 128496 | 128750 | 1.73 | 4.36E-02 | transcription_start_site | + | 130346 | 130346 | -1723 | 12314 | AN2392 |
| 1247 | CONTIG39 | 128496 | 128750 | 1.73 | 4.36E-02 | transcription_start_site | + | 131448 | 131448 | -2825 | 12315 | AN2392 |
| 1247 | CONTIG39 | 128496 | 128750 | 1.73 | 4.36E-02 | transcription_start_site | + | 131697 | 131697 | -3074 | 12316 | AN2392 |
| 678  | CONTIG39 | 142666 | 143095 | 2.22 | 7.85E-03 | transcription_start_site | - | 138263 | 138263 | -4617 | 12319 | AN2394 |
| 678  | CONTIG39 | 142666 | 143095 | 2.22 | 7.85E-03 | transcription_start_site | - | 138054 | 138054 | -4826 | 12320 | AN2394 |
| 2422 | CONTIG39 | 137556 | 137830 | 1.23 | 1.93E-01 | transcription_start_site | - | 138054 | 138054 | 361   | 12320 | AN2394 |
| 2422 | CONTIG39 | 137556 | 137830 | 1.23 | 1.93E-01 | transcription_start_site | - | 137271 | 137271 | -422  | 12321 | AN2394 |
| 2422 | CONTIG39 | 137556 | 137830 | 1.23 | 1.93E-01 | transcription_start_site | - | 138263 | 138263 | 570   | 12319 | AN2394 |
| 678  | CONTIG39 | 142666 | 143095 | 2.22 | 7.85E-03 | transcription_start_site | - | 142224 | 142224 | -656  | 12322 | AN2395 |
| 678  | CONTIG39 | 142666 | 143095 | 2.22 | 7.85E-03 | transcription_start_site | - | 141827 | 141827 | -1053 | 12323 | AN2395 |
| 678  | CONTIG39 | 142666 | 143095 | 2.22 | 7.85E-03 | transcription_start_site | - | 141561 | 141561 | -1319 | 12324 | AN2395 |
| 678  | CONTIG39 | 142666 | 143095 | 2.22 | 7.85E-03 | transcription_start_site | - | 141318 | 141318 | -1562 | 12325 | AN2395 |
| 678  | CONTIG39 | 142666 | 143095 | 2.22 | 7.85E-03 | transcription_start_site | - | 140851 | 140851 | -2029 | 12326 | AN2395 |
| 678  | CONTIG39 | 142666 | 143095 | 2.22 | 7.85E-03 | transcription_start_site | - | 140600 | 140600 | -2280 | 12327 | AN2395 |
| 678  | CONTIG39 | 142666 | 143095 | 2.22 | 7.85E-03 | transcription_start_site | - | 140395 | 140395 | -2485 | 12328 | AN2395 |
| 678  | CONTIG39 | 142666 | 143095 | 2.22 | 7.85E-03 | transcription_start_site | - | 143798 | 143798 | 917   | 12330 | AN2396 |
| 678  | CONTIG39 | 142666 | 143095 | 2.22 | 7.85E-03 | transcription_start_site | + | 145043 | 145043 | -2162 | 12331 | AN2397 |
| 678  | CONTIG39 | 142666 | 143095 | 2.22 | 7.85E-03 | transcription_start_site | + | 145236 | 145236 | -2355 | 12332 | AN2397 |
| 678  | CONTIG39 | 142666 | 143095 | 2.22 | 7.85E-03 | transcription_start_site | + | 146510 | 146510 | -3629 | 12333 | AN2397 |
| 1866 | CONTIG39 | 153171 | 153595 | 1.43 | 9.26E-02 | transcription_start_site | - | 149138 | 149138 | -4245 | 12334 | AN2398 |
| 1866 | CONTIG39 | 153171 | 153595 | 1.43 | 9.26E-02 | transcription_start_site | - | 148887 | 148887 | -4496 | 12335 | AN2398 |
| 1866 | CONTIG39 | 153171 | 153595 | 1.43 | 9.26E-02 | transcription_start_site | - | 148687 | 148687 | -4696 | 12336 | AN2398 |
| 1866 | CONTIG39 | 153171 | 153595 | 1.43 | 9.26E-02 | transcription_start_site | - | 148459 | 148459 | -4924 | 12337 | AN2398 |
| 1866 | CONTIG39 | 153171 | 153595 | 1.43 | 9.26E-02 | transcription_start_site | - | 150954 | 150954 | -2429 | 12338 | AN2399 |
| 1866 | CONTIG39 | 153171 | 153595 | 1.43 | 9.26E-02 | transcription_start_site | - | 150836 | 150836 | -2547 | 12339 | AN2399 |
| 1866 | CONTIG39 | 153171 | 153595 | 1.43 | 9.26E-02 | transcription_start_site | - | 150711 | 150711 | -2672 | 12340 | AN2399 |
| 1866 | CONTIG39 | 153171 | 153595 | 1.43 | 9.26E-02 | transcription_start_site | - | 150545 | 150545 | -2838 | 12341 | AN2399 |
| 1866 | CONTIG39 | 153171 | 153595 | 1.43 | 9.26E-02 | transcription_start_site | - | 150466 | 150466 | -2917 | 12342 | AN2399 |
| 2423 | CONTIG39 | 154669 | 154934 | 1.23 | 1.93E-01 | transcription_start_site | - | 150954 | 150954 | -3847 | 12338 | AN2399 |
| 2423 | CONTIG39 | 154669 | 154934 | 1.23 | 1.93E-01 | transcription_start_site | - | 150836 | 150836 | -3965 | 12339 | AN2399 |
| 2423 | CONTIG39 | 154669 | 154934 | 1.23 | 1.93E-01 | transcription_start_site | - | 150711 | 150711 | -4090 | 12340 | AN2399 |
| 2423 | CONTIG39 | 154669 | 154934 | 1.23 | 1.93E-01 | transcription_start_site | - | 150545 | 150545 | -4256 | 12341 | AN2399 |
| 2423 | CONTIG39 | 154669 | 154934 | 1.23 | 1.93E-01 | transcription_start_site | - | 150466 | 150466 | -4335 | 12342 | AN2399 |
| 1866 | CONTIG39 | 153171 | 153595 | 1.43 | 9.26E-02 | transcription_start_site | - | 153565 | 153565 | 182   | 12349 | AN2401 |

|      |          |        |        |      |          |                          |   |        |        |       |       |        |
|------|----------|--------|--------|------|----------|--------------------------|---|--------|--------|-------|-------|--------|
| 1866 | CONTIG39 | 153171 | 153595 | 1.43 | 9.26E-02 | transcription_start_site | - | 154543 | 154543 | 1160  | 12348 | AN2401 |
| 1869 | CONTIG39 | 160284 | 160628 | 1.43 | 1.08E-01 | transcription_start_site | - | 156763 | 156763 | -3693 | 12344 | AN2401 |
| 1869 | CONTIG39 | 160284 | 160628 | 1.43 | 1.08E-01 | transcription_start_site | - | 156544 | 156544 | -3912 | 12345 | AN2401 |
| 1869 | CONTIG39 | 160284 | 160628 | 1.43 | 1.08E-01 | transcription_start_site | - | 156047 | 156047 | -4409 | 12346 | AN2401 |
| 1869 | CONTIG39 | 160284 | 160628 | 1.43 | 1.08E-01 | transcription_start_site | - | 155719 | 155719 | -4737 | 12347 | AN2401 |
| 2423 | CONTIG39 | 154669 | 154934 | 1.23 | 1.93E-01 | transcription_start_site | - | 154543 | 154543 | -258  | 12348 | AN2401 |
| 2423 | CONTIG39 | 154669 | 154934 | 1.23 | 1.93E-01 | transcription_start_site | - | 155719 | 155719 | 917   | 12347 | AN2401 |
| 2423 | CONTIG39 | 154669 | 154934 | 1.23 | 1.93E-01 | transcription_start_site | - | 153565 | 153565 | -1236 | 12349 | AN2401 |
| 1866 | CONTIG39 | 153171 | 153595 | 1.43 | 9.26E-02 | transcription_start_site | + | 157427 | 157427 | -4044 | 12350 | AN2402 |
| 1866 | CONTIG39 | 153171 | 153595 | 1.43 | 9.26E-02 | transcription_start_site | + | 157585 | 157585 | -4202 | 12351 | AN2402 |
| 2423 | CONTIG39 | 154669 | 154934 | 1.23 | 1.93E-01 | transcription_start_site | + | 157427 | 157427 | -2625 | 12350 | AN2402 |
| 2423 | CONTIG39 | 154669 | 154934 | 1.23 | 1.93E-01 | transcription_start_site | + | 157585 | 157585 | -2783 | 12351 | AN2402 |
| 1406 | CONTIG39 | 167103 | 167472 | 1.63 | 5.88E-02 | transcription_start_site | - | 167363 | 167363 | 75    | 12352 | AN2404 |
| 1406 | CONTIG39 | 167103 | 167472 | 1.63 | 5.88E-02 | transcription_start_site | - | 166447 | 166447 | -840  | 12353 | AN2404 |
| 1406 | CONTIG39 | 167103 | 167472 | 1.63 | 5.88E-02 | transcription_start_site | + | 171417 | 171417 | -4129 | 12355 | AN2406 |
| 1406 | CONTIG39 | 167103 | 167472 | 1.63 | 5.88E-02 | transcription_start_site | + | 171795 | 171795 | -4507 | 12356 | AN2406 |
| 1407 | CONTIG39 | 177078 | 177442 | 1.63 | 5.88E-02 | transcription_start_site | + | 176237 | 176237 | 1023  | 12364 | AN2407 |
| 1407 | CONTIG39 | 177078 | 177442 | 1.63 | 5.88E-02 | transcription_start_site | + | 179872 | 179872 | -2612 | 12365 | AN2408 |
| 679  | CONTIG39 | 186993 | 187402 | 2.22 | 7.85E-03 | transcription_start_site | + | 188583 | 188583 | -1385 | 12366 | AN2410 |
| 679  | CONTIG39 | 186993 | 187402 | 2.22 | 7.85E-03 | transcription_start_site | + | 188779 | 188779 | -1581 | 12367 | AN2410 |
| 2125 | CONTIG39 | 187888 | 188464 | 1.33 | 1.44E-01 | transcription_start_site | + | 188583 | 188583 | -407  | 12366 | AN2410 |
| 2125 | CONTIG39 | 187888 | 188464 | 1.33 | 1.44E-01 | transcription_start_site | + | 188779 | 188779 | -603  | 12367 | AN2410 |
| 679  | CONTIG39 | 186993 | 187402 | 2.22 | 7.85E-03 | transcription_start_site | + | 190560 | 190560 | -3362 | 12368 | AN2411 |
| 679  | CONTIG39 | 186993 | 187402 | 2.22 | 7.85E-03 | transcription_start_site | + | 190843 | 190843 | -3645 | 12369 | AN2411 |
| 679  | CONTIG39 | 186993 | 187402 | 2.22 | 7.85E-03 | transcription_start_site | + | 191294 | 191294 | -4096 | 12370 | AN2411 |
| 679  | CONTIG39 | 186993 | 187402 | 2.22 | 7.85E-03 | transcription_start_site | + | 191894 | 191894 | -4696 | 12371 | AN2411 |
| 2125 | CONTIG39 | 187888 | 188464 | 1.33 | 1.44E-01 | transcription_start_site | + | 190560 | 190560 | -2384 | 12368 | AN2411 |
| 2125 | CONTIG39 | 187888 | 188464 | 1.33 | 1.44E-01 | transcription_start_site | + | 190843 | 190843 | -2667 | 12369 | AN2411 |
| 2125 | CONTIG39 | 187888 | 188464 | 1.33 | 1.44E-01 | transcription_start_site | + | 191294 | 191294 | -3118 | 12370 | AN2411 |
| 2125 | CONTIG39 | 187888 | 188464 | 1.33 | 1.44E-01 | transcription_start_site | + | 191894 | 191894 | -3718 | 12371 | AN2411 |
| 1867 | CONTIG39 | 201465 | 201884 | 1.43 | 9.26E-02 | transcription_start_site | - | 201592 | 201592 | -82   | 12379 | AN2414 |
| 1867 | CONTIG39 | 201465 | 201884 | 1.43 | 9.26E-02 | transcription_start_site | - | 200863 | 200863 | -811  | 12380 | AN2414 |
| 1867 | CONTIG39 | 201465 | 201884 | 1.43 | 9.26E-02 | transcription_start_site | - | 200092 | 200092 | -1582 | 12381 | AN2414 |
| 1867 | CONTIG39 | 201465 | 201884 | 1.43 | 9.26E-02 | transcription_start_site | + | 201987 | 201987 | -312  | 12382 | AN2415 |
| 1867 | CONTIG39 | 201465 | 201884 | 1.43 | 9.26E-02 | transcription_start_site | + | 202083 | 202083 | -408  | 12383 | AN2415 |
| 1867 | CONTIG39 | 201465 | 201884 | 1.43 | 9.26E-02 | transcription_start_site | + | 202236 | 202236 | -561  | 12384 | AN2415 |
| 1867 | CONTIG39 | 201465 | 201884 | 1.43 | 9.26E-02 | transcription_start_site | + | 205412 | 205412 | -3737 | 12390 | AN2417 |
| 1867 | CONTIG39 | 201465 | 201884 | 1.43 | 9.26E-02 | transcription_start_site | + | 206323 | 206323 | -4648 | 12391 | AN2417 |
| 1867 | CONTIG39 | 201465 | 201884 | 1.43 | 9.26E-02 | transcription_start_site | + | 206863 | 206863 | -5188 | 12392 | AN2417 |
| 1628 | CONTIG39 | 211665 | 212014 | 1.53 | 8.01E-02 | transcription_start_site | - | 211187 | 211187 | -652  | 12396 | AN2418 |
| 1628 | CONTIG39 | 211665 | 212014 | 1.53 | 8.01E-02 | transcription_start_site | - | 211047 | 211047 | -792  | 12397 | AN2418 |
| 1628 | CONTIG39 | 211665 | 212014 | 1.53 | 8.01E-02 | transcription_start_site | - | 210618 | 210618 | -1221 | 12398 | AN2418 |
| 1628 | CONTIG39 | 211665 | 212014 | 1.53 | 8.01E-02 | transcription_start_site | - | 210357 | 210357 | -1482 | 12399 | AN2418 |
| 1628 | CONTIG39 | 211665 | 212014 | 1.53 | 8.01E-02 | transcription_start_site | + | 211578 | 211578 | 261   | 12400 | AN2419 |
| 1628 | CONTIG39 | 211665 | 212014 | 1.53 | 8.01E-02 | transcription_start_site | + | 212859 | 212859 | -1019 | 12401 | AN2419 |
| 1628 | CONTIG39 | 211665 | 212014 | 1.53 | 8.01E-02 | transcription_start_site | + | 214645 | 214645 | -2805 | 12402 | AN2420 |
| 79   | CONTIG39 | 224930 | 225205 | 3.3  | 0.00E+00 | transcription_start_site | + | 228887 | 228887 | -3819 | 12403 | AN2421 |
| 79   | CONTIG39 | 224930 | 225205 | 3.3  | 0.00E+00 | transcription_start_site | + | 229398 | 229398 | -4330 | 12404 | AN2421 |
| 79   | CONTIG39 | 224930 | 225205 | 3.3  | 0.00E+00 | transcription_start_site | + | 229949 | 229949 | -4881 | 12405 | AN2421 |
| 130  | CONTIG39 | 223895 | 224454 | 3.11 | 0.00E+00 | transcription_start_site | + | 228887 | 228887 | -4712 | 12403 | AN2421 |
| 130  | CONTIG39 | 223895 | 224454 | 3.11 | 0.00E+00 | transcription_start_site | + | 229398 | 229398 | -5223 | 12404 | AN2421 |
| 518  | CONTIG39 | 226955 | 227389 | 2.42 | 4.46E-04 | transcription_start_site | + | 228887 | 228887 | -1715 | 12403 | AN2421 |
| 518  | CONTIG39 | 226955 | 227389 | 2.42 | 4.46E-04 | transcription_start_site | + | 229398 | 229398 | -2226 | 12404 | AN2421 |
| 518  | CONTIG39 | 226955 | 227389 | 2.42 | 4.46E-04 | transcription_start_site | + | 229949 | 229949 | -2777 | 12405 | AN2421 |
| 680  | CONTIG39 | 228090 | 228520 | 2.22 | 7.85E-03 | transcription_start_site | + | 228887 | 228887 | -582  | 12403 | AN2421 |
| 680  | CONTIG39 | 228090 | 228520 | 2.22 | 7.85E-03 | transcription_start_site | + | 229398 | 229398 | -1093 | 12404 | AN2421 |
| 680  | CONTIG39 | 228090 | 228520 | 2.22 | 7.85E-03 | transcription_start_site | + | 229949 | 229949 | -1644 | 12405 | AN2421 |



|      |          |        |        |      |          |                          |   |        |        |       |       |        |
|------|----------|--------|--------|------|----------|--------------------------|---|--------|--------|-------|-------|--------|
| 1119 | CONTIG39 | 228621 | 229270 | 1.82 | 3.08E-02 | transcription_start_site | + | 228887 | 228887 | 58    | 12403 | AN2421 |
| 1119 | CONTIG39 | 228621 | 229270 | 1.82 | 3.08E-02 | transcription_start_site | + | 229398 | 229398 | -452  | 12404 | AN2421 |
| 1119 | CONTIG39 | 228621 | 229270 | 1.82 | 3.08E-02 | transcription_start_site | + | 229949 | 229949 | -1003 | 12405 | AN2421 |
| 518  | CONTIG39 | 226955 | 227389 | 2.42 | 4.46E-04 | transcription_start_site | + | 231469 | 231469 | -4297 | 12406 | AN2422 |
| 518  | CONTIG39 | 226955 | 227389 | 2.42 | 4.46E-04 | transcription_start_site | + | 231714 | 231714 | -4542 | 12407 | AN2422 |
| 518  | CONTIG39 | 226955 | 227389 | 2.42 | 4.46E-04 | transcription_start_site | + | 231827 | 231827 | -4655 | 12408 | AN2422 |
| 518  | CONTIG39 | 226955 | 227389 | 2.42 | 4.46E-04 | transcription_start_site | + | 232260 | 232260 | -5088 | 12409 | AN2422 |
| 680  | CONTIG39 | 228090 | 228520 | 2.22 | 7.85E-03 | transcription_start_site | + | 231469 | 231469 | -3164 | 12406 | AN2422 |
| 680  | CONTIG39 | 228090 | 228520 | 2.22 | 7.85E-03 | transcription_start_site | + | 231714 | 231714 | -3409 | 12407 | AN2422 |
| 680  | CONTIG39 | 228090 | 228520 | 2.22 | 7.85E-03 | transcription_start_site | + | 231827 | 231827 | -3522 | 12408 | AN2422 |
| 680  | CONTIG39 | 228090 | 228520 | 2.22 | 7.85E-03 | transcription_start_site | + | 232260 | 232260 | -3955 | 12409 | AN2422 |
| 680  | CONTIG39 | 228090 | 228520 | 2.22 | 7.85E-03 | transcription_start_site | + | 233243 | 233243 | -4938 | 12410 | AN2422 |
| 1119 | CONTIG39 | 228621 | 229270 | 1.82 | 3.08E-02 | transcription_start_site | + | 231469 | 231469 | -2523 | 12406 | AN2422 |
| 1119 | CONTIG39 | 228621 | 229270 | 1.82 | 3.08E-02 | transcription_start_site | + | 231714 | 231714 | -2768 | 12407 | AN2422 |
| 1119 | CONTIG39 | 228621 | 229270 | 1.82 | 3.08E-02 | transcription_start_site | + | 231827 | 231827 | -2881 | 12408 | AN2422 |
| 1119 | CONTIG39 | 228621 | 229270 | 1.82 | 3.08E-02 | transcription_start_site | + | 232260 | 232260 | -3314 | 12409 | AN2422 |
| 1119 | CONTIG39 | 228621 | 229270 | 1.82 | 3.08E-02 | transcription_start_site | + | 233243 | 233243 | -4297 | 12410 | AN2422 |
| 38   | CONTIG40 | 14259  | 14538  | 3.49 | 0.00E+00 | transcription_start_site | + | 15158  | 15158  | -759  | 12415 | AN2425 |
| 38   | CONTIG40 | 14259  | 14538  | 3.49 | 0.00E+00 | transcription_start_site | + | 15298  | 15298  | -899  | 12416 | AN2425 |
| 38   | CONTIG40 | 14259  | 14538  | 3.49 | 0.00E+00 | transcription_start_site | + | 15590  | 15590  | -1191 | 12417 | AN2425 |
| 677  | CONTIG40 | 12242  | 12886  | 2.22 | 5.41E-03 | transcription_start_site | + | 15158  | 15158  | -2594 | 12415 | AN2425 |
| 677  | CONTIG40 | 12242  | 12886  | 2.22 | 5.41E-03 | transcription_start_site | + | 15298  | 15298  | -2734 | 12416 | AN2425 |
| 677  | CONTIG40 | 12242  | 12886  | 2.22 | 5.41E-03 | transcription_start_site | + | 15590  | 15590  | -3026 | 12417 | AN2425 |
| 38   | CONTIG40 | 14259  | 14538  | 3.49 | 0.00E+00 | transcription_start_site | + | 19059  | 19059  | -4660 | 12418 | AN2426 |
| 38   | CONTIG40 | 14259  | 14538  | 3.49 | 0.00E+00 | transcription_start_site | + | 19235  | 19235  | -4836 | 12419 | AN2426 |
| 847  | CONTIG40 | 18604  | 18878  | 2.06 | 2.12E-02 | transcription_start_site | + | 19059  | 19059  | -318  | 12418 | AN2426 |
| 847  | CONTIG40 | 18604  | 18878  | 2.06 | 2.12E-02 | transcription_start_site | + | 19235  | 19235  | -494  | 12419 | AN2426 |
| 556  | CONTIG40 | 21904  | 22338  | 2.38 | 7.85E-03 | transcription_start_site | + | 22461  | 22461  | -340  | 12420 | AN2427 |
| 847  | CONTIG40 | 18604  | 18878  | 2.06 | 2.12E-02 | transcription_start_site | + | 22461  | 22461  | -3720 | 12420 | AN2427 |
| 682  | CONTIG40 | 47193  | 47677  | 2.22 | 1.30E-02 | transcription_start_site | - | 47314  | 47314  | -121  | 12440 | AN2435 |
| 682  | CONTIG40 | 47193  | 47677  | 2.22 | 1.30E-02 | transcription_start_site | - | 46816  | 46816  | -619  | 12441 | AN2435 |
| 1143 | CONTIG40 | 48228  | 48817  | 1.8  | 3.33E-02 | transcription_start_site | - | 47314  | 47314  | -1208 | 12440 | AN2435 |
| 1143 | CONTIG40 | 48228  | 48817  | 1.8  | 3.33E-02 | transcription_start_site | - | 46816  | 46816  | -1706 | 12441 | AN2435 |
| 682  | CONTIG40 | 47193  | 47677  | 2.22 | 1.30E-02 | transcription_start_site | + | 49235  | 49235  | -1800 | 12442 | AN2436 |
| 682  | CONTIG40 | 47193  | 47677  | 2.22 | 1.30E-02 | transcription_start_site | + | 49426  | 49426  | -1991 | 12443 | AN2436 |
| 682  | CONTIG40 | 47193  | 47677  | 2.22 | 1.30E-02 | transcription_start_site | + | 49600  | 49600  | -2165 | 12444 | AN2436 |
| 682  | CONTIG40 | 47193  | 47677  | 2.22 | 1.30E-02 | transcription_start_site | + | 49846  | 49846  | -2411 | 12445 | AN2436 |
| 682  | CONTIG40 | 47193  | 47677  | 2.22 | 1.30E-02 | transcription_start_site | + | 51001  | 51001  | -3566 | 12446 | AN2436 |
| 1143 | CONTIG40 | 48228  | 48817  | 1.8  | 3.33E-02 | transcription_start_site | + | 49235  | 49235  | -712  | 12442 | AN2436 |
| 1143 | CONTIG40 | 48228  | 48817  | 1.8  | 3.33E-02 | transcription_start_site | + | 49426  | 49426  | -903  | 12443 | AN2436 |
| 1143 | CONTIG40 | 48228  | 48817  | 1.8  | 3.33E-02 | transcription_start_site | + | 49600  | 49600  | -1077 | 12444 | AN2436 |
| 1143 | CONTIG40 | 48228  | 48817  | 1.8  | 3.33E-02 | transcription_start_site | + | 49846  | 49846  | -1323 | 12445 | AN2436 |
| 1143 | CONTIG40 | 48228  | 48817  | 1.8  | 3.33E-02 | transcription_start_site | + | 51001  | 51001  | -2478 | 12446 | AN2436 |
| 682  | CONTIG40 | 47193  | 47677  | 2.22 | 1.30E-02 | transcription_start_site | + | 51971  | 51971  | -4536 | 12447 | AN2437 |
| 682  | CONTIG40 | 47193  | 47677  | 2.22 | 1.30E-02 | transcription_start_site | + | 52310  | 52310  | -4875 | 12448 | AN2437 |
| 1143 | CONTIG40 | 48228  | 48817  | 1.8  | 3.33E-02 | transcription_start_site | + | 51971  | 51971  | -3448 | 12447 | AN2437 |
| 1143 | CONTIG40 | 48228  | 48817  | 1.8  | 3.33E-02 | transcription_start_site | + | 52310  | 52310  | -3787 | 12448 | AN2437 |
| 413  | CONTIG40 | 109295 | 109569 | 2.59 | 3.61E-03 | transcription_start_site | - | 109745 | 109745 | 313   | 12506 | AN2459 |
| 413  | CONTIG40 | 109295 | 109569 | 2.59 | 3.61E-03 | transcription_start_site | - | 105487 | 105487 | -3945 | 12507 | AN2459 |
| 1759 | CONTIG40 | 111240 | 111819 | 1.48 | 8.00E-02 | transcription_start_site | - | 109745 | 109745 | -1784 | 12506 | AN2459 |
| 413  | CONTIG40 | 109295 | 109569 | 2.59 | 3.61E-03 | transcription_start_site | + | 111434 | 111434 | -2002 | 12508 | AN2460 |
| 1759 | CONTIG40 | 111240 | 111819 | 1.48 | 8.00E-02 | transcription_start_site | + | 111434 | 111434 | 95    | 12508 | AN2460 |
| 413  | CONTIG40 | 109295 | 109569 | 2.59 | 3.61E-03 | transcription_start_site | + | 113743 | 113743 | -4311 | 12509 | AN2461 |
| 413  | CONTIG40 | 109295 | 109569 | 2.59 | 3.61E-03 | transcription_start_site | + | 113818 | 113818 | -4386 | 12510 | AN2461 |
| 413  | CONTIG40 | 109295 | 109569 | 2.59 | 3.61E-03 | transcription_start_site | + | 113947 | 113947 | -4515 | 12511 | AN2461 |
| 413  | CONTIG40 | 109295 | 109569 | 2.59 | 3.61E-03 | transcription_start_site | + | 114299 | 114299 | -4867 | 12512 | AN2461 |
| 1759 | CONTIG40 | 111240 | 111819 | 1.48 | 8.00E-02 | transcription_start_site | + | 113743 | 113743 | -2213 | 12509 | AN2461 |

|      |          |        |        |      |          |                          |   |        |        |       |       |        |
|------|----------|--------|--------|------|----------|--------------------------|---|--------|--------|-------|-------|--------|
| 1759 | CONTIG40 | 111240 | 111819 | 1.48 | 8.00E-02 | transcription_start_site | + | 113818 | 113818 | -2288 | 12510 | AN2461 |
| 1759 | CONTIG40 | 111240 | 111819 | 1.48 | 8.00E-02 | transcription_start_site | + | 113947 | 113947 | -2417 | 12511 | AN2461 |
| 1759 | CONTIG40 | 111240 | 111819 | 1.48 | 8.00E-02 | transcription_start_site | + | 114299 | 114299 | -2769 | 12512 | AN2461 |
| 1759 | CONTIG40 | 111240 | 111819 | 1.48 | 8.00E-02 | transcription_start_site | + | 114975 | 114975 | -3445 | 12513 | AN2461 |
| 1759 | CONTIG40 | 111240 | 111819 | 1.48 | 8.00E-02 | transcription_start_site | + | 115259 | 115259 | -3729 | 12514 | AN2461 |
| 1759 | CONTIG40 | 111240 | 111819 | 1.48 | 8.00E-02 | transcription_start_site | + | 115638 | 115638 | -4108 | 12515 | AN2461 |
| 1759 | CONTIG40 | 111240 | 111819 | 1.48 | 8.00E-02 | transcription_start_site | + | 116235 | 116235 | -4705 | 12516 | AN2461 |
| 1759 | CONTIG40 | 111240 | 111819 | 1.48 | 8.00E-02 | transcription_start_site | + | 116687 | 116687 | -5157 | 12517 | AN2461 |
| 735  | CONTIG40 | 133741 | 134005 | 2.17 | 1.57E-02 | transcription_start_site | - | 129221 | 129221 | -4652 | 12522 | AN2464 |
| 735  | CONTIG40 | 133741 | 134005 | 2.17 | 1.57E-02 | transcription_start_site | - | 129037 | 129037 | -4836 | 12523 | AN2464 |
| 735  | CONTIG40 | 133741 | 134005 | 2.17 | 1.57E-02 | transcription_start_site | - | 133549 | 133549 | -324  | 12525 | AN2465 |
| 735  | CONTIG40 | 133741 | 134005 | 2.17 | 1.57E-02 | transcription_start_site | - | 133151 | 133151 | -722  | 12526 | AN2465 |
| 735  | CONTIG40 | 133741 | 134005 | 2.17 | 1.57E-02 | transcription_start_site | - | 131703 | 131703 | -2170 | 12527 | AN2465 |
| 735  | CONTIG40 | 133741 | 134005 | 2.17 | 1.57E-02 | transcription_start_site | - | 131323 | 131323 | -2550 | 12528 | AN2465 |
| 735  | CONTIG40 | 133741 | 134005 | 2.17 | 1.57E-02 | transcription_start_site | - | 131090 | 131090 | -2783 | 12529 | AN2465 |
| 735  | CONTIG40 | 133741 | 134005 | 2.17 | 1.57E-02 | transcription_start_site | - | 130840 | 130840 | -3033 | 12530 | AN2465 |
| 1989 | CONTIG40 | 138471 | 139480 | 1.38 | 1.59E-01 | transcription_start_site | - | 133549 | 133549 | -5426 | 12525 | AN2465 |
| 31   | CONTIG40 | 140646 | 141070 | 3.54 | 0.00E+00 | transcription_start_site | - | 139652 | 139652 | -1206 | 12531 | AN2466 |
| 31   | CONTIG40 | 140646 | 141070 | 3.54 | 0.00E+00 | transcription_start_site | - | 139478 | 139478 | -1380 | 12532 | AN2466 |
| 31   | CONTIG40 | 140646 | 141070 | 3.54 | 0.00E+00 | transcription_start_site | - | 139219 | 139219 | -1639 | 12533 | AN2466 |
| 31   | CONTIG40 | 140646 | 141070 | 3.54 | 0.00E+00 | transcription_start_site | - | 139043 | 139043 | -1815 | 12534 | AN2466 |
| 213  | CONTIG40 | 140031 | 140600 | 2.91 | 1.01E-03 | transcription_start_site | - | 139652 | 139652 | -663  | 12531 | AN2466 |
| 213  | CONTIG40 | 140031 | 140600 | 2.91 | 1.01E-03 | transcription_start_site | - | 139478 | 139478 | -837  | 12532 | AN2466 |
| 213  | CONTIG40 | 140031 | 140600 | 2.91 | 1.01E-03 | transcription_start_site | - | 139219 | 139219 | -1096 | 12533 | AN2466 |
| 213  | CONTIG40 | 140031 | 140600 | 2.91 | 1.01E-03 | transcription_start_site | - | 139043 | 139043 | -1272 | 12534 | AN2466 |
| 1388 | CONTIG40 | 142741 | 143020 | 1.64 | 8.01E-02 | transcription_start_site | - | 139652 | 139652 | -3228 | 12531 | AN2466 |
| 1388 | CONTIG40 | 142741 | 143020 | 1.64 | 8.01E-02 | transcription_start_site | - | 139478 | 139478 | -3402 | 12532 | AN2466 |
| 1388 | CONTIG40 | 142741 | 143020 | 1.64 | 8.01E-02 | transcription_start_site | - | 139219 | 139219 | -3661 | 12533 | AN2466 |
| 1388 | CONTIG40 | 142741 | 143020 | 1.64 | 8.01E-02 | transcription_start_site | - | 139043 | 139043 | -3837 | 12534 | AN2466 |
| 1989 | CONTIG40 | 138471 | 139480 | 1.38 | 1.59E-01 | transcription_start_site | - | 139043 | 139043 | 67    | 12534 | AN2466 |
| 1989 | CONTIG40 | 138471 | 139480 | 1.38 | 1.59E-01 | transcription_start_site | - | 139219 | 139219 | 243   | 12533 | AN2466 |
| 1989 | CONTIG40 | 138471 | 139480 | 1.38 | 1.59E-01 | transcription_start_site | - | 139478 | 139478 | 502   | 12532 | AN2466 |
| 1989 | CONTIG40 | 138471 | 139480 | 1.38 | 1.59E-01 | transcription_start_site | - | 139652 | 139652 | 676   | 12531 | AN2466 |
| 1388 | CONTIG40 | 142741 | 143020 | 1.64 | 8.01E-02 | transcription_start_site | - | 143040 | 143040 | 159   | 12535 | AN2467 |
| 31   | CONTIG40 | 140646 | 141070 | 3.54 | 0.00E+00 | transcription_start_site | + | 143760 | 143760 | -2902 | 12536 | AN2468 |
| 31   | CONTIG40 | 140646 | 141070 | 3.54 | 0.00E+00 | transcription_start_site | + | 143965 | 143965 | -3107 | 12537 | AN2468 |
| 31   | CONTIG40 | 140646 | 141070 | 3.54 | 0.00E+00 | transcription_start_site | + | 144126 | 144126 | -3268 | 12538 | AN2468 |
| 31   | CONTIG40 | 140646 | 141070 | 3.54 | 0.00E+00 | transcription_start_site | + | 144465 | 144465 | -3607 | 12539 | AN2468 |
| 31   | CONTIG40 | 140646 | 141070 | 3.54 | 0.00E+00 | transcription_start_site | + | 144697 | 144697 | -3839 | 12540 | AN2468 |
| 31   | CONTIG40 | 140646 | 141070 | 3.54 | 0.00E+00 | transcription_start_site | + | 144842 | 144842 | -3984 | 12541 | AN2468 |
| 213  | CONTIG40 | 140031 | 140600 | 2.91 | 1.01E-03 | transcription_start_site | + | 143760 | 143760 | -3444 | 12536 | AN2468 |
| 213  | CONTIG40 | 140031 | 140600 | 2.91 | 1.01E-03 | transcription_start_site | + | 143965 | 143965 | -3649 | 12537 | AN2468 |
| 213  | CONTIG40 | 140031 | 140600 | 2.91 | 1.01E-03 | transcription_start_site | + | 144126 | 144126 | -3810 | 12538 | AN2468 |
| 213  | CONTIG40 | 140031 | 140600 | 2.91 | 1.01E-03 | transcription_start_site | + | 144465 | 144465 | -4149 | 12539 | AN2468 |
| 213  | CONTIG40 | 140031 | 140600 | 2.91 | 1.01E-03 | transcription_start_site | + | 144697 | 144697 | -4381 | 12540 | AN2468 |
| 213  | CONTIG40 | 140031 | 140600 | 2.91 | 1.01E-03 | transcription_start_site | + | 144842 | 144842 | -4526 | 12541 | AN2468 |
| 1388 | CONTIG40 | 142741 | 143020 | 1.64 | 8.01E-02 | transcription_start_site | + | 143760 | 143760 | -879  | 12536 | AN2468 |
| 1388 | CONTIG40 | 142741 | 143020 | 1.64 | 8.01E-02 | transcription_start_site | + | 143965 | 143965 | -1084 | 12537 | AN2468 |
| 1388 | CONTIG40 | 142741 | 143020 | 1.64 | 8.01E-02 | transcription_start_site | + | 144126 | 144126 | -1245 | 12538 | AN2468 |
| 1388 | CONTIG40 | 142741 | 143020 | 1.64 | 8.01E-02 | transcription_start_site | + | 144465 | 144465 | -1584 | 12539 | AN2468 |
| 1388 | CONTIG40 | 142741 | 143020 | 1.64 | 8.01E-02 | transcription_start_site | + | 144697 | 144697 | -1816 | 12540 | AN2468 |
| 1388 | CONTIG40 | 142741 | 143020 | 1.64 | 8.01E-02 | transcription_start_site | + | 144842 | 144842 | -1961 | 12541 | AN2468 |
| 1989 | CONTIG40 | 138471 | 139480 | 1.38 | 1.59E-01 | transcription_start_site | + | 143760 | 143760 | -4784 | 12536 | AN2468 |
| 1989 | CONTIG40 | 138471 | 139480 | 1.38 | 1.59E-01 | transcription_start_site | + | 143965 | 143965 | -4989 | 12537 | AN2468 |
| 1989 | CONTIG40 | 138471 | 139480 | 1.38 | 1.59E-01 | transcription_start_site | + | 144126 | 144126 | -5150 | 12538 | AN2468 |
| 1989 | CONTIG40 | 138471 | 139480 | 1.38 | 1.59E-01 | transcription_start_site | + | 144465 | 144465 | -5489 | 12539 | AN2468 |
| 331  | CONTIG41 | 391    | 730    | 2.72 | 4.61E-03 | transcription_start_site | + | 4066   | 4066   | -3505 | 12544 | AN2470 |

|      |          |       |       |      |          |                          |   |       |       |       |       |        |
|------|----------|-------|-------|------|----------|--------------------------|---|-------|-------|-------|-------|--------|
| 331  | CONTIG41 | 391   | 730   | 2.72 | 4.61E-03 | transcription_start_site | + | 4293  | 4293  | -3732 | 12545 | AN2470 |
| 331  | CONTIG41 | 391   | 730   | 2.72 | 4.61E-03 | transcription_start_site | + | 4473  | 4473  | -3912 | 12546 | AN2470 |
| 331  | CONTIG41 | 391   | 730   | 2.72 | 4.61E-03 | transcription_start_site | + | 5335  | 5335  | -4774 | 12547 | AN2470 |
| 1389 | CONTIG41 | 9693  | 10198 | 1.64 | 1.08E-01 | transcription_start_site | - | 6106  | 6106  | -3839 | 12548 | AN2471 |
| 1389 | CONTIG41 | 9693  | 10198 | 1.64 | 1.08E-01 | transcription_start_site | - | 6010  | 6010  | -3935 | 12549 | AN2471 |
| 1389 | CONTIG41 | 9693  | 10198 | 1.64 | 1.08E-01 | transcription_start_site | - | 5851  | 5851  | -4094 | 12550 | AN2471 |
| 246  | CONTIG41 | 14792 | 15426 | 2.84 | 0.00E+00 | transcription_start_site | - | 9879  | 9879  | -5230 | 12555 | AN2473 |
| 1389 | CONTIG41 | 9693  | 10198 | 1.64 | 1.08E-01 | transcription_start_site | - | 9879  | 9879  | -66   | 12555 | AN2473 |
| 1389 | CONTIG41 | 9693  | 10198 | 1.64 | 1.08E-01 | transcription_start_site | - | 9511  | 9511  | -434  | 12556 | AN2473 |
| 1389 | CONTIG41 | 9693  | 10198 | 1.64 | 1.08E-01 | transcription_start_site | - | 8869  | 8869  | -1076 | 12557 | AN2473 |
| 246  | CONTIG41 | 14792 | 15426 | 2.84 | 0.00E+00 | transcription_start_site | - | 11990 | 11990 | -3119 | 12558 | AN2474 |
| 246  | CONTIG41 | 14792 | 15426 | 2.84 | 0.00E+00 | transcription_start_site | - | 11881 | 11881 | -3228 | 12559 | AN2474 |
| 504  | CONTIG41 | 16507 | 17001 | 2.44 | 4.81E-03 | transcription_start_site | - | 11990 | 11990 | -4764 | 12558 | AN2474 |
| 504  | CONTIG41 | 16507 | 17001 | 2.44 | 4.81E-03 | transcription_start_site | - | 11881 | 11881 | -4873 | 12559 | AN2474 |
| 246  | CONTIG41 | 14792 | 15426 | 2.84 | 0.00E+00 | transcription_start_site | - | 14444 | 14444 | -665  | 12560 | AN2475 |
| 246  | CONTIG41 | 14792 | 15426 | 2.84 | 0.00E+00 | transcription_start_site | - | 14094 | 14094 | -1015 | 12561 | AN2475 |
| 504  | CONTIG41 | 16507 | 17001 | 2.44 | 4.81E-03 | transcription_start_site | - | 14444 | 14444 | -2310 | 12560 | AN2475 |
| 504  | CONTIG41 | 16507 | 17001 | 2.44 | 4.81E-03 | transcription_start_site | - | 14094 | 14094 | -2660 | 12561 | AN2475 |
| 59   | CONTIG41 | 61070 | 61404 | 3.4  | 2.16E-04 | transcription_start_site | + | 60263 | 60263 | 974   | 12596 | AN2487 |
| 59   | CONTIG41 | 61070 | 61404 | 3.4  | 2.16E-04 | transcription_start_site | + | 61732 | 61732 | -495  | 12597 | AN2488 |
| 59   | CONTIG41 | 61070 | 61404 | 3.4  | 2.16E-04 | transcription_start_site | + | 61926 | 61926 | -689  | 12598 | AN2488 |
| 59   | CONTIG41 | 61070 | 61404 | 3.4  | 2.16E-04 | transcription_start_site | + | 62089 | 62089 | -852  | 12599 | AN2488 |
| 59   | CONTIG41 | 61070 | 61404 | 3.4  | 2.16E-04 | transcription_start_site | + | 62262 | 62262 | -1025 | 12600 | AN2488 |
| 295  | CONTIG42 | 28803 | 29092 | 2.77 | 1.54E-03 | transcription_start_site | + | 30566 | 30566 | -1618 | 12626 | AN2498 |
| 295  | CONTIG42 | 28803 | 29092 | 2.77 | 1.54E-03 | transcription_start_site | + | 31408 | 31408 | -2460 | 12627 | AN2498 |
| 295  | CONTIG42 | 28803 | 29092 | 2.77 | 1.54E-03 | transcription_start_site | + | 31727 | 31727 | -2779 | 12628 | AN2498 |
| 916  | CONTIG42 | 36828 | 37342 | 1.99 | 2.62E-02 | transcription_start_site | - | 34922 | 34922 | -2163 | 12629 | AN2499 |
| 916  | CONTIG42 | 36828 | 37342 | 1.99 | 2.62E-02 | transcription_start_site | - | 34854 | 34854 | -2231 | 12630 | AN2499 |
| 916  | CONTIG42 | 36828 | 37342 | 1.99 | 2.62E-02 | transcription_start_site | - | 34442 | 34442 | -2643 | 12631 | AN2499 |
| 916  | CONTIG42 | 36828 | 37342 | 1.99 | 2.62E-02 | transcription_start_site | - | 33287 | 33287 | -3798 | 12632 | AN2499 |
| 1339 | CONTIG42 | 39754 | 40043 | 1.67 | 6.84E-02 | transcription_start_site | - | 34922 | 34922 | -4976 | 12629 | AN2499 |
| 1339 | CONTIG42 | 39754 | 40043 | 1.67 | 6.84E-02 | transcription_start_site | - | 34854 | 34854 | -5044 | 12630 | AN2499 |
| 2047 | CONTIG42 | 33843 | 34102 | 1.36 | 1.66E-01 | transcription_start_site | - | 34442 | 34442 | 469   | 12631 | AN2499 |
| 2047 | CONTIG42 | 33843 | 34102 | 1.36 | 1.66E-01 | transcription_start_site | - | 33287 | 33287 | -685  | 12632 | AN2499 |
| 2047 | CONTIG42 | 33843 | 34102 | 1.36 | 1.66E-01 | transcription_start_site | - | 34854 | 34854 | 881   | 12630 | AN2499 |
| 2047 | CONTIG42 | 33843 | 34102 | 1.36 | 1.66E-01 | transcription_start_site | - | 34922 | 34922 | 949   | 12629 | AN2499 |
| 916  | CONTIG42 | 36828 | 37342 | 1.99 | 2.62E-02 | transcription_start_site | - | 36108 | 36108 | -977  | 12633 | AN2500 |
| 916  | CONTIG42 | 36828 | 37342 | 1.99 | 2.62E-02 | transcription_start_site | - | 35960 | 35960 | -1125 | 12634 | AN2500 |
| 916  | CONTIG42 | 36828 | 37342 | 1.99 | 2.62E-02 | transcription_start_site | - | 35291 | 35291 | -1794 | 12635 | AN2500 |
| 1339 | CONTIG42 | 39754 | 40043 | 1.67 | 6.84E-02 | transcription_start_site | - | 36108 | 36108 | -3790 | 12633 | AN2500 |
| 1339 | CONTIG42 | 39754 | 40043 | 1.67 | 6.84E-02 | transcription_start_site | - | 35960 | 35960 | -3938 | 12634 | AN2500 |
| 1339 | CONTIG42 | 39754 | 40043 | 1.67 | 6.84E-02 | transcription_start_site | - | 35291 | 35291 | -4607 | 12635 | AN2500 |
| 1340 | CONTIG42 | 40954 | 41458 | 1.67 | 6.84E-02 | transcription_start_site | - | 36108 | 36108 | -5098 | 12633 | AN2500 |
| 1340 | CONTIG42 | 40954 | 41458 | 1.67 | 6.84E-02 | transcription_start_site | - | 35960 | 35960 | -5246 | 12634 | AN2500 |
| 916  | CONTIG42 | 36828 | 37342 | 1.99 | 2.62E-02 | transcription_start_site | + | 37206 | 37206 | -121  | 12636 | AN2501 |
| 2047 | CONTIG42 | 33843 | 34102 | 1.36 | 1.66E-01 | transcription_start_site | + | 37206 | 37206 | -3233 | 12636 | AN2501 |
| 20   | CONTIG42 | 43596 | 44396 | 3.61 | 0.00E+00 | transcription_start_site | - | 40040 | 40040 | -3956 | 12637 | AN2502 |
| 81   | CONTIG42 | 42151 | 42579 | 3.3  | 0.00E+00 | transcription_start_site | - | 40040 | 40040 | -2325 | 12637 | AN2502 |
| 612  | CONTIG42 | 42696 | 43270 | 2.3  | 8.81E-03 | transcription_start_site | - | 40040 | 40040 | -2943 | 12637 | AN2502 |
| 1339 | CONTIG42 | 39754 | 40043 | 1.67 | 6.84E-02 | transcription_start_site | - | 40040 | 40040 | 141   | 12637 | AN2502 |
| 1340 | CONTIG42 | 40954 | 41458 | 1.67 | 6.84E-02 | transcription_start_site | - | 40040 | 40040 | -1166 | 12637 | AN2502 |
| 20   | CONTIG42 | 43596 | 44396 | 3.61 | 0.00E+00 | transcription_start_site | - | 43689 | 43689 | -307  | 12639 | AN2503 |
| 20   | CONTIG42 | 43596 | 44396 | 3.61 | 0.00E+00 | transcription_start_site | - | 44351 | 44351 | 355   | 12638 | AN2503 |
| 20   | CONTIG42 | 43596 | 44396 | 3.61 | 0.00E+00 | transcription_start_site | - | 43556 | 43556 | -440  | 12640 | AN2503 |
| 20   | CONTIG42 | 43596 | 44396 | 3.61 | 0.00E+00 | transcription_start_site | - | 43430 | 43430 | -566  | 12641 | AN2503 |
| 20   | CONTIG42 | 43596 | 44396 | 3.61 | 0.00E+00 | transcription_start_site | - | 43272 | 43272 | -724  | 12642 | AN2503 |
| 20   | CONTIG42 | 43596 | 44396 | 3.61 | 0.00E+00 | transcription_start_site | - | 42981 | 42981 | -1015 | 12643 | AN2503 |

|      |          |       |       |      |          |                          |   |       |       |       |       |        |
|------|----------|-------|-------|------|----------|--------------------------|---|-------|-------|-------|-------|--------|
| 81   | CONTIG42 | 42151 | 42579 | 3.3  | 0.00E+00 | transcription_start_site | - | 42981 | 42981 | 616   | 12643 | AN2503 |
| 81   | CONTIG42 | 42151 | 42579 | 3.3  | 0.00E+00 | transcription_start_site | - | 43272 | 43272 | 907   | 12642 | AN2503 |
| 81   | CONTIG42 | 42151 | 42579 | 3.3  | 0.00E+00 | transcription_start_site | - | 43430 | 43430 | 1065  | 12641 | AN2503 |
| 81   | CONTIG42 | 42151 | 42579 | 3.3  | 0.00E+00 | transcription_start_site | - | 43556 | 43556 | 1191  | 12640 | AN2503 |
| 612  | CONTIG42 | 42696 | 43270 | 2.3  | 8.81E-03 | transcription_start_site | - | 42981 | 42981 | -2    | 12643 | AN2503 |
| 612  | CONTIG42 | 42696 | 43270 | 2.3  | 8.81E-03 | transcription_start_site | - | 43272 | 43272 | 289   | 12642 | AN2503 |
| 612  | CONTIG42 | 42696 | 43270 | 2.3  | 8.81E-03 | transcription_start_site | - | 43430 | 43430 | 447   | 12641 | AN2503 |
| 612  | CONTIG42 | 42696 | 43270 | 2.3  | 8.81E-03 | transcription_start_site | - | 43556 | 43556 | 573   | 12640 | AN2503 |
| 612  | CONTIG42 | 42696 | 43270 | 2.3  | 8.81E-03 | transcription_start_site | - | 43689 | 43689 | 706   | 12639 | AN2503 |
| 235  | CONTIG42 | 71042 | 71301 | 2.88 | 1.01E-03 | transcription_start_site | - | 67236 | 67236 | -3935 | 12657 | AN2507 |
| 235  | CONTIG42 | 71042 | 71301 | 2.88 | 1.01E-03 | transcription_start_site | - | 67178 | 67178 | -3993 | 12658 | AN2507 |
| 1112 | CONTIG42 | 68702 | 68986 | 1.83 | 4.36E-02 | transcription_start_site | - | 67236 | 67236 | -1608 | 12657 | AN2507 |
| 1112 | CONTIG42 | 68702 | 68986 | 1.83 | 4.36E-02 | transcription_start_site | - | 67178 | 67178 | -1666 | 12658 | AN2507 |
| 235  | CONTIG42 | 71042 | 71301 | 2.88 | 1.01E-03 | transcription_start_site | + | 70246 | 70246 | 925   | 12660 | AN2508 |
| 1112 | CONTIG42 | 68702 | 68986 | 1.83 | 4.36E-02 | transcription_start_site | + | 68953 | 68953 | -109  | 12659 | AN2508 |
| 1112 | CONTIG42 | 68702 | 68986 | 1.83 | 4.36E-02 | transcription_start_site | + | 70246 | 70246 | -1402 | 12660 | AN2508 |
| 235  | CONTIG42 | 71042 | 71301 | 2.88 | 1.01E-03 | transcription_start_site | + | 72109 | 72109 | -937  | 12661 | AN2509 |
| 235  | CONTIG42 | 71042 | 71301 | 2.88 | 1.01E-03 | transcription_start_site | + | 72478 | 72478 | -1306 | 12662 | AN2509 |
| 235  | CONTIG42 | 71042 | 71301 | 2.88 | 1.01E-03 | transcription_start_site | + | 73735 | 73735 | -2563 | 12663 | AN2509 |
| 235  | CONTIG42 | 71042 | 71301 | 2.88 | 1.01E-03 | transcription_start_site | + | 73869 | 73869 | -2697 | 12664 | AN2509 |
| 1112 | CONTIG42 | 68702 | 68986 | 1.83 | 4.36E-02 | transcription_start_site | + | 72109 | 72109 | -3265 | 12661 | AN2509 |
| 1112 | CONTIG42 | 68702 | 68986 | 1.83 | 4.36E-02 | transcription_start_site | + | 72478 | 72478 | -3634 | 12662 | AN2509 |
| 1112 | CONTIG42 | 68702 | 68986 | 1.83 | 4.36E-02 | transcription_start_site | + | 73735 | 73735 | -4891 | 12663 | AN2509 |
| 1112 | CONTIG42 | 68702 | 68986 | 1.83 | 4.36E-02 | transcription_start_site | + | 73869 | 73869 | -5025 | 12664 | AN2509 |
| 235  | CONTIG42 | 71042 | 71301 | 2.88 | 1.01E-03 | transcription_start_site | + | 76281 | 76281 | -5109 | 12665 | AN2510 |
| 1341 | CONTIG42 | 96606 | 97028 | 1.67 | 6.84E-02 | transcription_start_site | - | 96163 | 96163 | -654  | 12686 | AN2517 |
| 1341 | CONTIG42 | 96606 | 97028 | 1.67 | 6.84E-02 | transcription_start_site | - | 95774 | 95774 | -1043 | 12687 | AN2517 |
| 1341 | CONTIG42 | 96606 | 97028 | 1.67 | 6.84E-02 | transcription_start_site | - | 95556 | 95556 | -1261 | 12688 | AN2517 |
| 1341 | CONTIG42 | 96606 | 97028 | 1.67 | 6.84E-02 | transcription_start_site | - | 95394 | 95394 | -1423 | 12689 | AN2517 |
| 1341 | CONTIG42 | 96606 | 97028 | 1.67 | 6.84E-02 | transcription_start_site | + | 97655 | 97655 | -838  | 12690 | AN2518 |
| 1341 | CONTIG42 | 96606 | 97028 | 1.67 | 6.84E-02 | transcription_start_site | + | 97735 | 97735 | -918  | 12691 | AN2518 |
| 1341 | CONTIG42 | 96606 | 97028 | 1.67 | 6.84E-02 | transcription_start_site | + | 98021 | 98021 | -1204 | 12692 | AN2518 |
| 1341 | CONTIG42 | 96606 | 97028 | 1.67 | 6.84E-02 | transcription_start_site | + | 98434 | 98434 | -1617 | 12693 | AN2518 |
| 971  | CONTIG43 | 4071  | 4795  | 1.93 | 3.31E-03 | transcription_start_site | - | 2519  | 2519  | -1914 | 12696 | AN2520 |
| 971  | CONTIG43 | 4071  | 4795  | 1.93 | 3.31E-03 | transcription_start_site | - | 2345  | 2345  | -2088 | 12697 | AN2520 |
| 971  | CONTIG43 | 4071  | 4795  | 1.93 | 3.31E-03 | transcription_start_site | - | 1501  | 1501  | -2932 | 12698 | AN2520 |
| 1875 | CONTIG43 | 6376  | 6650  | 1.42 | 5.88E-02 | transcription_start_site | - | 2519  | 2519  | -3994 | 12696 | AN2520 |
| 1875 | CONTIG43 | 6376  | 6650  | 1.42 | 5.88E-02 | transcription_start_site | - | 2345  | 2345  | -4168 | 12697 | AN2520 |
| 1875 | CONTIG43 | 6376  | 6650  | 1.42 | 5.88E-02 | transcription_start_site | - | 1501  | 1501  | -5012 | 12698 | AN2520 |
| 971  | CONTIG43 | 4071  | 4795  | 1.93 | 3.31E-03 | transcription_start_site | + | 4627  | 4627  | -194  | 12703 | AN2521 |
| 971  | CONTIG43 | 4071  | 4795  | 1.93 | 3.31E-03 | transcription_start_site | + | 4067  | 4067  | 366   | 12702 | AN2521 |
| 971  | CONTIG43 | 4071  | 4795  | 1.93 | 3.31E-03 | transcription_start_site | + | 3767  | 3767  | 666   | 12701 | AN2521 |
| 971  | CONTIG43 | 4071  | 4795  | 1.93 | 3.31E-03 | transcription_start_site | + | 3600  | 3600  | 833   | 12700 | AN2521 |
| 971  | CONTIG43 | 4071  | 4795  | 1.93 | 3.31E-03 | transcription_start_site | + | 3497  | 3497  | 936   | 12699 | AN2521 |
| 971  | CONTIG43 | 4071  | 4795  | 1.93 | 3.31E-03 | transcription_start_site | + | 5677  | 5677  | -1244 | 12704 | AN2521 |
| 971  | CONTIG43 | 4071  | 4795  | 1.93 | 3.31E-03 | transcription_start_site | + | 5763  | 5763  | -1330 | 12705 | AN2521 |
| 1875 | CONTIG43 | 6376  | 6650  | 1.42 | 5.88E-02 | transcription_start_site | + | 5763  | 5763  | 750   | 12705 | AN2521 |
| 1875 | CONTIG43 | 6376  | 6650  | 1.42 | 5.88E-02 | transcription_start_site | + | 5677  | 5677  | 836   | 12704 | AN2521 |
| 878  | CONTIG43 | 10521 | 10850 | 2.02 | 5.20E-03 | transcription_start_site | - | 7518  | 7518  | -3167 | 12706 | AN2522 |
| 878  | CONTIG43 | 10521 | 10850 | 2.02 | 5.20E-03 | transcription_start_site | - | 7426  | 7426  | -3259 | 12707 | AN2522 |
| 1875 | CONTIG43 | 6376  | 6650  | 1.42 | 5.88E-02 | transcription_start_site | - | 7426  | 7426  | 913   | 12707 | AN2522 |
| 1875 | CONTIG43 | 6376  | 6650  | 1.42 | 5.88E-02 | transcription_start_site | - | 7518  | 7518  | 1005  | 12706 | AN2522 |
| 1876 | CONTIG43 | 11416 | 11685 | 1.42 | 5.88E-02 | transcription_start_site | - | 7518  | 7518  | -4032 | 12706 | AN2522 |
| 1876 | CONTIG43 | 11416 | 11685 | 1.42 | 5.88E-02 | transcription_start_site | - | 7426  | 7426  | -4124 | 12707 | AN2522 |
| 878  | CONTIG43 | 10521 | 10850 | 2.02 | 5.20E-03 | transcription_start_site | + | 12355 | 12355 | -1669 | 12708 | AN2523 |
| 878  | CONTIG43 | 10521 | 10850 | 2.02 | 5.20E-03 | transcription_start_site | + | 12509 | 12509 | -1823 | 12709 | AN2523 |
| 878  | CONTIG43 | 10521 | 10850 | 2.02 | 5.20E-03 | transcription_start_site | + | 13049 | 13049 | -2363 | 12710 | AN2523 |

|               |        |        |      |          |                          |   |        |        |       |       |        |
|---------------|--------|--------|------|----------|--------------------------|---|--------|--------|-------|-------|--------|
| 878 CONTIG43  | 10521  | 10850  | 2.02 | 5.20E-03 | transcription_start_site | + | 13466  | 13466  | -2780 | 12711 | AN2523 |
| 878 CONTIG43  | 10521  | 10850  | 2.02 | 5.20E-03 | transcription_start_site | + | 14367  | 14367  | -3681 | 12712 | AN2523 |
| 878 CONTIG43  | 10521  | 10850  | 2.02 | 5.20E-03 | transcription_start_site | + | 15254  | 15254  | -4568 | 12713 | AN2523 |
| 1876 CONTIG43 | 11416  | 11685  | 1.42 | 5.88E-02 | transcription_start_site | + | 12355  | 12355  | -804  | 12708 | AN2523 |
| 1876 CONTIG43 | 11416  | 11685  | 1.42 | 5.88E-02 | transcription_start_site | + | 12509  | 12509  | -958  | 12709 | AN2523 |
| 1876 CONTIG43 | 11416  | 11685  | 1.42 | 5.88E-02 | transcription_start_site | + | 13049  | 13049  | -1498 | 12710 | AN2523 |
| 1876 CONTIG43 | 11416  | 11685  | 1.42 | 5.88E-02 | transcription_start_site | + | 13466  | 13466  | -1915 | 12711 | AN2523 |
| 1876 CONTIG43 | 11416  | 11685  | 1.42 | 5.88E-02 | transcription_start_site | + | 14367  | 14367  | -2816 | 12712 | AN2523 |
| 1876 CONTIG43 | 11416  | 11685  | 1.42 | 5.88E-02 | transcription_start_site | + | 15254  | 15254  | -3703 | 12713 | AN2523 |
| 1877 CONTIG43 | 24843  | 25182  | 1.42 | 5.88E-02 | transcription_start_site | - | 23455  | 23455  | -1557 | 12714 | AN2525 |
| 1877 CONTIG43 | 24843  | 25182  | 1.42 | 5.88E-02 | transcription_start_site | - | 23052  | 23052  | -1960 | 12715 | AN2525 |
| 1877 CONTIG43 | 24843  | 25182  | 1.42 | 5.88E-02 | transcription_start_site | - | 24981  | 24981  | -31   | 12716 | AN2526 |
| 1877 CONTIG43 | 24843  | 25182  | 1.42 | 5.88E-02 | transcription_start_site | + | 25785  | 25785  | -772  | 12717 | AN2527 |
| 926 CONTIG43  | 37967  | 38241  | 1.98 | 6.61E-03 | transcription_start_site | - | 33742  | 33742  | -4362 | 12723 | AN2530 |
| 926 CONTIG43  | 37967  | 38241  | 1.98 | 6.61E-03 | transcription_start_site | - | 37808  | 37808  | -296  | 12724 | AN2531 |
| 926 CONTIG43  | 37967  | 38241  | 1.98 | 6.61E-03 | transcription_start_site | - | 37579  | 37579  | -525  | 12725 | AN2531 |
| 926 CONTIG43  | 37967  | 38241  | 1.98 | 6.61E-03 | transcription_start_site | - | 37314  | 37314  | -790  | 12726 | AN2531 |
| 926 CONTIG43  | 37967  | 38241  | 1.98 | 6.61E-03 | transcription_start_site | - | 37054  | 37054  | -1050 | 12727 | AN2531 |
| 926 CONTIG43  | 37967  | 38241  | 1.98 | 6.61E-03 | transcription_start_site | - | 36841  | 36841  | -1263 | 12728 | AN2531 |
| 926 CONTIG43  | 37967  | 38241  | 1.98 | 6.61E-03 | transcription_start_site | - | 36375  | 36375  | -1729 | 12729 | AN2531 |
| 926 CONTIG43  | 37967  | 38241  | 1.98 | 6.61E-03 | transcription_start_site | + | 38873  | 38873  | -769  | 12730 | AN2532 |
| 926 CONTIG43  | 37967  | 38241  | 1.98 | 6.61E-03 | transcription_start_site | + | 39262  | 39262  | -1158 | 12731 | AN2532 |
| 926 CONTIG43  | 37967  | 38241  | 1.98 | 6.61E-03 | transcription_start_site | + | 39890  | 39890  | -1786 | 12732 | AN2532 |
| 926 CONTIG43  | 37967  | 38241  | 1.98 | 6.61E-03 | transcription_start_site | + | 40909  | 40909  | -2805 | 12733 | AN2532 |
| 659 CONTIG43  | 49067  | 49333  | 2.23 | 1.80E-03 | transcription_start_site | - | 45242  | 45242  | -3958 | 12734 | AN2533 |
| 659 CONTIG43  | 49067  | 49333  | 2.23 | 1.80E-03 | transcription_start_site | - | 44894  | 44894  | -4306 | 12735 | AN2533 |
| 659 CONTIG43  | 49067  | 49333  | 2.23 | 1.80E-03 | transcription_start_site | - | 44754  | 44754  | -4446 | 12736 | AN2533 |
| 659 CONTIG43  | 49067  | 49333  | 2.23 | 1.80E-03 | transcription_start_site | - | 44257  | 44257  | -4943 | 12737 | AN2533 |
| 837 CONTIG43  | 49512  | 50016  | 2.06 | 4.61E-03 | transcription_start_site | - | 45242  | 45242  | -4522 | 12734 | AN2533 |
| 837 CONTIG43  | 49512  | 50016  | 2.06 | 4.61E-03 | transcription_start_site | - | 44894  | 44894  | -4870 | 12735 | AN2533 |
| 837 CONTIG43  | 49512  | 50016  | 2.06 | 4.61E-03 | transcription_start_site | - | 44754  | 44754  | -5010 | 12736 | AN2533 |
| 659 CONTIG43  | 49067  | 49333  | 2.23 | 1.80E-03 | transcription_start_site | - | 48893  | 48893  | -307  | 12745 | AN2535 |
| 659 CONTIG43  | 49067  | 49333  | 2.23 | 1.80E-03 | transcription_start_site | - | 48730  | 48730  | -470  | 12746 | AN2535 |
| 659 CONTIG43  | 49067  | 49333  | 2.23 | 1.80E-03 | transcription_start_site | - | 48565  | 48565  | -635  | 12747 | AN2535 |
| 837 CONTIG43  | 49512  | 50016  | 2.06 | 4.61E-03 | transcription_start_site | - | 48893  | 48893  | -871  | 12745 | AN2535 |
| 837 CONTIG43  | 49512  | 50016  | 2.06 | 4.61E-03 | transcription_start_site | - | 48730  | 48730  | -1034 | 12746 | AN2535 |
| 837 CONTIG43  | 49512  | 50016  | 2.06 | 4.61E-03 | transcription_start_site | - | 48565  | 48565  | -1199 | 12747 | AN2535 |
| 659 CONTIG43  | 49067  | 49333  | 2.23 | 1.80E-03 | transcription_start_site | + | 52816  | 52816  | -3616 | 12748 | AN2537 |
| 659 CONTIG43  | 49067  | 49333  | 2.23 | 1.80E-03 | transcription_start_site | + | 53157  | 53157  | -3957 | 12749 | AN2537 |
| 659 CONTIG43  | 49067  | 49333  | 2.23 | 1.80E-03 | transcription_start_site | + | 53383  | 53383  | -4183 | 12750 | AN2537 |
| 659 CONTIG43  | 49067  | 49333  | 2.23 | 1.80E-03 | transcription_start_site | + | 53729  | 53729  | -4529 | 12751 | AN2537 |
| 837 CONTIG43  | 49512  | 50016  | 2.06 | 4.61E-03 | transcription_start_site | + | 52816  | 52816  | -3052 | 12748 | AN2537 |
| 837 CONTIG43  | 49512  | 50016  | 2.06 | 4.61E-03 | transcription_start_site | + | 53157  | 53157  | -3393 | 12749 | AN2537 |
| 837 CONTIG43  | 49512  | 50016  | 2.06 | 4.61E-03 | transcription_start_site | + | 53383  | 53383  | -3619 | 12750 | AN2537 |
| 837 CONTIG43  | 49512  | 50016  | 2.06 | 4.61E-03 | transcription_start_site | + | 53729  | 53729  | -3965 | 12751 | AN2537 |
| 2616 CONTIG43 | 63535  | 63805  | 1.16 | 1.44E-01 | transcription_start_site | - | 62975  | 62975  | -695  | 12759 | AN2541 |
| 2616 CONTIG43 | 63535  | 63805  | 1.16 | 1.44E-01 | transcription_start_site | - | 62526  | 62526  | -1144 | 12760 | AN2541 |
| 2616 CONTIG43 | 63535  | 63805  | 1.16 | 1.44E-01 | transcription_start_site | - | 62276  | 62276  | -1394 | 12761 | AN2541 |
| 2616 CONTIG43 | 63535  | 63805  | 1.16 | 1.44E-01 | transcription_start_site | + | 66790  | 66790  | -3120 | 12762 | AN2542 |
| 2616 CONTIG43 | 63535  | 63805  | 1.16 | 1.44E-01 | transcription_start_site | + | 67312  | 67312  | -3642 | 12763 | AN2542 |
| 2616 CONTIG43 | 63535  | 63805  | 1.16 | 1.44E-01 | transcription_start_site | + | 67645  | 67645  | -3975 | 12764 | AN2542 |
| 655 CONTIG43  | 115519 | 115853 | 2.23 | 0.00E+00 | transcription_start_site | - | 114202 | 114202 | -1484 | 12783 | AN2549 |
| 655 CONTIG43  | 115519 | 115853 | 2.23 | 0.00E+00 | transcription_start_site | - | 113861 | 113861 | -1825 | 12784 | AN2549 |
| 655 CONTIG43  | 115519 | 115853 | 2.23 | 0.00E+00 | transcription_start_site | - | 113430 | 113430 | -2256 | 12785 | AN2549 |
| 655 CONTIG43  | 115519 | 115853 | 2.23 | 0.00E+00 | transcription_start_site | - | 113138 | 113138 | -2548 | 12786 | AN2549 |
| 655 CONTIG43  | 115519 | 115853 | 2.23 | 0.00E+00 | transcription_start_site | - | 112925 | 112925 | -2761 | 12787 | AN2549 |
| 655 CONTIG43  | 115519 | 115853 | 2.23 | 0.00E+00 | transcription_start_site | - | 112534 | 112534 | -3152 | 12788 | AN2549 |

|      |          |        |        |      |          |                          |   |        |        |       |       |        |
|------|----------|--------|--------|------|----------|--------------------------|---|--------|--------|-------|-------|--------|
| 655  | CONTIG43 | 115519 | 115853 | 2.23 | 0.00E+00 | transcription_start_site | + | 117496 | 117496 | -1810 | 12789 | AN2550 |
| 655  | CONTIG43 | 115519 | 115853 | 2.23 | 0.00E+00 | transcription_start_site | + | 117742 | 117742 | -2056 | 12790 | AN2550 |
| 655  | CONTIG43 | 115519 | 115853 | 2.23 | 0.00E+00 | transcription_start_site | + | 117994 | 117994 | -2308 | 12791 | AN2550 |
| 655  | CONTIG43 | 115519 | 115853 | 2.23 | 0.00E+00 | transcription_start_site | + | 118441 | 118441 | -2755 | 12792 | AN2550 |
| 2615 | CONTIG43 | 146265 | 148109 | 1.16 | 1.28E-01 | transcription_start_site | - | 142269 | 142269 | -4918 | 12809 | AN2557 |
| 2615 | CONTIG43 | 146265 | 148109 | 1.16 | 1.28E-01 | transcription_start_site | + | 146036 | 146036 | 1151  | 12813 | AN2558 |
| 2615 | CONTIG43 | 146265 | 148109 | 1.16 | 1.28E-01 | transcription_start_site | + | 145729 | 145729 | 1458  | 12812 | AN2558 |
| 2615 | CONTIG43 | 146265 | 148109 | 1.16 | 1.28E-01 | transcription_start_site | + | 145391 | 145391 | 1796  | 12811 | AN2558 |
| 1577 | CONTIG43 | 149190 | 149469 | 1.55 | 3.70E-02 | transcription_start_site | - | 149232 | 149232 | -97   | 12815 | AN2559 |
| 1577 | CONTIG43 | 149190 | 149469 | 1.55 | 3.70E-02 | transcription_start_site | - | 149625 | 149625 | 295   | 12814 | AN2559 |
| 1577 | CONTIG43 | 149190 | 149469 | 1.55 | 3.70E-02 | transcription_start_site | - | 148730 | 148730 | -599  | 12816 | AN2559 |
| 2615 | CONTIG43 | 146265 | 148109 | 1.16 | 1.28E-01 | transcription_start_site | - | 148730 | 148730 | 1543  | 12816 | AN2559 |
| 1577 | CONTIG43 | 149190 | 149469 | 1.55 | 3.70E-02 | transcription_start_site | + | 150227 | 150227 | -897  | 12817 | AN2560 |
| 1577 | CONTIG43 | 149190 | 149469 | 1.55 | 3.70E-02 | transcription_start_site | + | 150404 | 150404 | -1074 | 12818 | AN2560 |
| 1577 | CONTIG43 | 149190 | 149469 | 1.55 | 3.70E-02 | transcription_start_site | + | 151571 | 151571 | -2241 | 12819 | AN2560 |
| 1577 | CONTIG43 | 149190 | 149469 | 1.55 | 3.70E-02 | transcription_start_site | + | 152043 | 152043 | -2713 | 12820 | AN2560 |
| 1577 | CONTIG43 | 149190 | 149469 | 1.55 | 3.70E-02 | transcription_start_site | + | 152205 | 152205 | -2875 | 12821 | AN2560 |
| 2615 | CONTIG43 | 146265 | 148109 | 1.16 | 1.28E-01 | transcription_start_site | + | 150227 | 150227 | -3040 | 12817 | AN2560 |
| 2615 | CONTIG43 | 146265 | 148109 | 1.16 | 1.28E-01 | transcription_start_site | + | 150404 | 150404 | -3217 | 12818 | AN2560 |
| 2615 | CONTIG43 | 146265 | 148109 | 1.16 | 1.28E-01 | transcription_start_site | + | 151571 | 151571 | -4384 | 12819 | AN2560 |
| 2615 | CONTIG43 | 146265 | 148109 | 1.16 | 1.28E-01 | transcription_start_site | + | 152043 | 152043 | -4856 | 12820 | AN2560 |
| 2615 | CONTIG43 | 146265 | 148109 | 1.16 | 1.28E-01 | transcription_start_site | + | 152205 | 152205 | -5018 | 12821 | AN2560 |
| 1577 | CONTIG43 | 149190 | 149469 | 1.55 | 3.70E-02 | transcription_start_site | + | 152746 | 152746 | -3416 | 12822 | AN2561 |
| 1577 | CONTIG43 | 149190 | 149469 | 1.55 | 3.70E-02 | transcription_start_site | + | 153179 | 153179 | -3849 | 12823 | AN2561 |
| 1577 | CONTIG43 | 149190 | 149469 | 1.55 | 3.70E-02 | transcription_start_site | + | 153808 | 153808 | -4478 | 12824 | AN2561 |
| 2615 | CONTIG43 | 146265 | 148109 | 1.16 | 1.28E-01 | transcription_start_site | + | 152746 | 152746 | -5559 | 12822 | AN2561 |
| 1577 | CONTIG43 | 149190 | 149469 | 1.55 | 3.70E-02 | transcription_start_site | + | 154321 | 154321 | -4991 | 12825 | AN2562 |
| 1577 | CONTIG43 | 149190 | 149469 | 1.55 | 3.70E-02 | transcription_start_site | + | 154433 | 154433 | -5103 | 12826 | AN2562 |
| 660  | CONTIG43 | 171605 | 172029 | 2.23 | 1.80E-03 | transcription_start_site | - | 166658 | 166658 | -5159 | 12839 | AN2567 |
| 660  | CONTIG43 | 171605 | 172029 | 2.23 | 1.80E-03 | transcription_start_site | - | 170575 | 170575 | -1242 | 12844 | AN2569 |
| 660  | CONTIG43 | 171605 | 172029 | 2.23 | 1.80E-03 | transcription_start_site | - | 170320 | 170320 | -1497 | 12845 | AN2569 |
| 660  | CONTIG43 | 171605 | 172029 | 2.23 | 1.80E-03 | transcription_start_site | - | 170115 | 170115 | -1702 | 12846 | AN2569 |
| 660  | CONTIG43 | 171605 | 172029 | 2.23 | 1.80E-03 | transcription_start_site | - | 169935 | 169935 | -1882 | 12847 | AN2569 |
| 660  | CONTIG43 | 171605 | 172029 | 2.23 | 1.80E-03 | transcription_start_site | - | 169780 | 169780 | -2037 | 12848 | AN2569 |
| 660  | CONTIG43 | 171605 | 172029 | 2.23 | 1.80E-03 | transcription_start_site | - | 169500 | 169500 | -2317 | 12849 | AN2569 |
| 751  | CONTIG43 | 174460 | 174739 | 2.15 | 3.03E-03 | transcription_start_site | - | 170575 | 170575 | -4024 | 12844 | AN2569 |
| 751  | CONTIG43 | 174460 | 174739 | 2.15 | 3.03E-03 | transcription_start_site | - | 170320 | 170320 | -4279 | 12845 | AN2569 |
| 751  | CONTIG43 | 174460 | 174739 | 2.15 | 3.03E-03 | transcription_start_site | - | 170115 | 170115 | -4484 | 12846 | AN2569 |
| 751  | CONTIG43 | 174460 | 174739 | 2.15 | 3.03E-03 | transcription_start_site | - | 169935 | 169935 | -4664 | 12847 | AN2569 |
| 751  | CONTIG43 | 174460 | 174739 | 2.15 | 3.03E-03 | transcription_start_site | - | 169780 | 169780 | -4819 | 12848 | AN2569 |
| 751  | CONTIG43 | 174460 | 174739 | 2.15 | 3.03E-03 | transcription_start_site | - | 169500 | 169500 | -5099 | 12849 | AN2569 |
| 660  | CONTIG43 | 171605 | 172029 | 2.23 | 1.80E-03 | transcription_start_site | + | 172014 | 172014 | -197  | 12850 | AN2570 |
| 660  | CONTIG43 | 171605 | 172029 | 2.23 | 1.80E-03 | transcription_start_site | + | 172698 | 172698 | -881  | 12851 | AN2570 |
| 660  | CONTIG43 | 171605 | 172029 | 2.23 | 1.80E-03 | transcription_start_site | + | 174961 | 174961 | -3144 | 12852 | AN2571 |
| 751  | CONTIG43 | 174460 | 174739 | 2.15 | 3.03E-03 | transcription_start_site | + | 174961 | 174961 | -361  | 12852 | AN2571 |
| 751  | CONTIG43 | 174460 | 174739 | 2.15 | 3.03E-03 | transcription_start_site | + | 178374 | 178374 | -3774 | 12853 | AN2572 |
| 751  | CONTIG43 | 174460 | 174739 | 2.15 | 3.03E-03 | transcription_start_site | + | 178508 | 178508 | -3908 | 12854 | AN2572 |
| 751  | CONTIG43 | 174460 | 174739 | 2.15 | 3.03E-03 | transcription_start_site | + | 178643 | 178643 | -4043 | 12855 | AN2572 |
| 751  | CONTIG43 | 174460 | 174739 | 2.15 | 3.03E-03 | transcription_start_site | + | 178925 | 178925 | -4325 | 12856 | AN2572 |
| 2004 | CONTIG43 | 193426 | 193705 | 1.37 | 6.84E-02 | transcription_start_site | + | 192462 | 192462 | 1103  | 12866 | AN2574 |
| 2004 | CONTIG43 | 193426 | 193705 | 1.37 | 6.84E-02 | transcription_start_site | + | 194467 | 194467 | -901  | 12867 | AN2575 |
| 2004 | CONTIG43 | 193426 | 193705 | 1.37 | 6.84E-02 | transcription_start_site | + | 194804 | 194804 | -1238 | 12868 | AN2575 |
| 2004 | CONTIG43 | 193426 | 193705 | 1.37 | 6.84E-02 | transcription_start_site | + | 194891 | 194891 | -1325 | 12869 | AN2575 |
| 2004 | CONTIG43 | 193426 | 193705 | 1.37 | 6.84E-02 | transcription_start_site | + | 195048 | 195048 | -1482 | 12870 | AN2575 |
| 2004 | CONTIG43 | 193426 | 193705 | 1.37 | 6.84E-02 | transcription_start_site | + | 195688 | 195688 | -2122 | 12871 | AN2575 |
| 2004 | CONTIG43 | 193426 | 193705 | 1.37 | 6.84E-02 | transcription_start_site | + | 196160 | 196160 | -2594 | 12872 | AN2575 |
| 2004 | CONTIG43 | 193426 | 193705 | 1.37 | 6.84E-02 | transcription_start_site | + | 196603 | 196603 | -3037 | 12873 | AN2576 |



|               |        |        |      |          |                          |   |        |        |       |       |        |
|---------------|--------|--------|------|----------|--------------------------|---|--------|--------|-------|-------|--------|
| 2004 CONTIG43 | 193426 | 193705 | 1.37 | 6.84E-02 | transcription_start_site | + | 198128 | 198128 | -4562 | 12874 | AN2576 |
| 1871 CONTIG43 | 209795 | 211194 | 1.42 | 2.86E-02 | transcription_start_site | + | 213629 | 213629 | -3134 | 12884 | AN2580 |
| 1871 CONTIG43 | 209795 | 211194 | 1.42 | 2.86E-02 | transcription_start_site | + | 214096 | 214096 | -3601 | 12885 | AN2580 |
| 1871 CONTIG43 | 209795 | 211194 | 1.42 | 2.86E-02 | transcription_start_site | + | 214331 | 214331 | -3836 | 12886 | AN2580 |
| 1871 CONTIG43 | 209795 | 211194 | 1.42 | 2.86E-02 | transcription_start_site | + | 214923 | 214923 | -4428 | 12887 | AN2580 |
| 1871 CONTIG43 | 209795 | 211194 | 1.42 | 2.86E-02 | transcription_start_site | + | 215065 | 215065 | -4570 | 12888 | AN2580 |
| 2617 CONTIG43 | 208294 | 208853 | 1.16 | 1.44E-01 | transcription_start_site | + | 213629 | 213629 | -5055 | 12884 | AN2580 |
| 148 CONTIG43  | 217054 | 217418 | 3.05 | 0.00E+00 | transcription_start_site | + | 217545 | 217545 | -309  | 12889 | AN2581 |
| 148 CONTIG43  | 217054 | 217418 | 3.05 | 0.00E+00 | transcription_start_site | + | 217675 | 217675 | -439  | 12890 | AN2581 |
| 148 CONTIG43  | 217054 | 217418 | 3.05 | 0.00E+00 | transcription_start_site | + | 221329 | 221329 | -4093 | 12891 | AN2581 |
| 2218 CONTIG43 | 218419 | 218838 | 1.29 | 9.24E-02 | transcription_start_site | + | 217675 | 217675 | 953   | 12890 | AN2581 |
| 2218 CONTIG43 | 218419 | 218838 | 1.29 | 9.24E-02 | transcription_start_site | + | 217545 | 217545 | 1083  | 12889 | AN2581 |
| 2218 CONTIG43 | 218419 | 218838 | 1.29 | 9.24E-02 | transcription_start_site | + | 221329 | 221329 | -2700 | 12891 | AN2581 |
| 2797 CONTIG43 | 220439 | 220933 | 1.07 | 1.93E-01 | transcription_start_site | + | 221329 | 221329 | -643  | 12891 | AN2581 |
| 2219 CONTIG43 | 222464 | 223478 | 1.29 | 9.24E-02 | transcription_start_site | - | 223307 | 223307 | 336   | 12893 | AN2582 |
| 2219 CONTIG43 | 222464 | 223478 | 1.29 | 9.24E-02 | transcription_start_site | - | 223601 | 223601 | 630   | 12892 | AN2582 |
| 2618 CONTIG43 | 225229 | 225503 | 1.16 | 1.44E-01 | transcription_start_site | - | 223601 | 223601 | -1765 | 12892 | AN2582 |
| 2618 CONTIG43 | 225229 | 225503 | 1.16 | 1.44E-01 | transcription_start_site | - | 223307 | 223307 | -2059 | 12893 | AN2582 |
| 2798 CONTIG43 | 224114 | 224603 | 1.07 | 1.93E-01 | transcription_start_site | - | 223601 | 223601 | -757  | 12892 | AN2582 |
| 2798 CONTIG43 | 224114 | 224603 | 1.07 | 1.93E-01 | transcription_start_site | - | 223307 | 223307 | -1051 | 12893 | AN2582 |
| 2618 CONTIG43 | 225229 | 225503 | 1.16 | 1.44E-01 | transcription_start_site | - | 225508 | 225508 | 142   | 12895 | AN2583 |
| 2618 CONTIG43 | 225229 | 225503 | 1.16 | 1.44E-01 | transcription_start_site | - | 225635 | 225635 | 269   | 12894 | AN2583 |
| 2618 CONTIG43 | 225229 | 225503 | 1.16 | 1.44E-01 | transcription_start_site | - | 224882 | 224882 | -484  | 12896 | AN2583 |
| 2618 CONTIG43 | 225229 | 225503 | 1.16 | 1.44E-01 | transcription_start_site | - | 224689 | 224689 | -677  | 12897 | AN2583 |
| 2798 CONTIG43 | 224114 | 224603 | 1.07 | 1.93E-01 | transcription_start_site | - | 224689 | 224689 | 330   | 12897 | AN2583 |
| 2798 CONTIG43 | 224114 | 224603 | 1.07 | 1.93E-01 | transcription_start_site | - | 224882 | 224882 | 523   | 12896 | AN2583 |
| 2798 CONTIG43 | 224114 | 224603 | 1.07 | 1.93E-01 | transcription_start_site | - | 225508 | 225508 | 1149  | 12895 | AN2583 |
| 1691 CONTIG43 | 232821 | 233155 | 1.5  | 4.36E-02 | transcription_start_site | - | 228332 | 228332 | -4656 | 12898 | AN2584 |
| 592 CONTIG43  | 233946 | 234200 | 2.32 | 1.22E-03 | transcription_start_site | - | 233431 | 233431 | -642  | 12899 | AN2585 |
| 592 CONTIG43  | 233946 | 234200 | 2.32 | 1.22E-03 | transcription_start_site | - | 232191 | 232191 | -1882 | 12900 | AN2585 |
| 592 CONTIG43  | 233946 | 234200 | 2.32 | 1.22E-03 | transcription_start_site | - | 232055 | 232055 | -2018 | 12901 | AN2585 |
| 1691 CONTIG43 | 232821 | 233155 | 1.5  | 4.36E-02 | transcription_start_site | - | 233431 | 233431 | 443   | 12899 | AN2585 |
| 1691 CONTIG43 | 232821 | 233155 | 1.5  | 4.36E-02 | transcription_start_site | - | 232191 | 232191 | -797  | 12900 | AN2585 |
| 1691 CONTIG43 | 232821 | 233155 | 1.5  | 4.36E-02 | transcription_start_site | - | 232055 | 232055 | -933  | 12901 | AN2585 |
| 2619 CONTIG43 | 255167 | 255501 | 1.16 | 1.44E-01 | transcription_start_site | + | 255277 | 255277 | 57    | 12932 | AN2593 |
| 2619 CONTIG43 | 255167 | 255501 | 1.16 | 1.44E-01 | transcription_start_site | + | 254779 | 254779 | 555   | 12931 | AN2593 |
| 2619 CONTIG43 | 255167 | 255501 | 1.16 | 1.44E-01 | transcription_start_site | + | 254646 | 254646 | 688   | 12930 | AN2593 |
| 2619 CONTIG43 | 255167 | 255501 | 1.16 | 1.44E-01 | transcription_start_site | + | 254462 | 254462 | 872   | 12929 | AN2593 |
| 2619 CONTIG43 | 255167 | 255501 | 1.16 | 1.44E-01 | transcription_start_site | + | 254206 | 254206 | 1128  | 12928 | AN2593 |
| 2619 CONTIG43 | 255167 | 255501 | 1.16 | 1.44E-01 | transcription_start_site | - | 256265 | 256265 | 931   | 12934 | AN2594 |
| 2619 CONTIG43 | 255167 | 255501 | 1.16 | 1.44E-01 | transcription_start_site | - | 256490 | 256490 | 1156  | 12933 | AN2594 |
| 39 CONTIG43   | 262216 | 262551 | 3.48 | 0.00E+00 | transcription_start_site | - | 258243 | 258243 | -4140 | 12935 | AN2595 |
| 39 CONTIG43   | 262216 | 262551 | 3.48 | 0.00E+00 | transcription_start_site | - | 257848 | 257848 | -4535 | 12936 | AN2595 |
| 309 CONTIG43  | 262667 | 263616 | 2.75 | 0.00E+00 | transcription_start_site | - | 258243 | 258243 | -4898 | 12935 | AN2595 |
| 309 CONTIG43  | 262667 | 263616 | 2.75 | 0.00E+00 | transcription_start_site | - | 257848 | 257848 | -5293 | 12936 | AN2595 |
| 39 CONTIG43   | 262216 | 262551 | 3.48 | 0.00E+00 | transcription_start_site | - | 262055 | 262055 | -328  | 12937 | AN2596 |
| 39 CONTIG43   | 262216 | 262551 | 3.48 | 0.00E+00 | transcription_start_site | - | 261675 | 261675 | -708  | 12938 | AN2596 |
| 39 CONTIG43   | 262216 | 262551 | 3.48 | 0.00E+00 | transcription_start_site | - | 261279 | 261279 | -1104 | 12939 | AN2596 |
| 39 CONTIG43   | 262216 | 262551 | 3.48 | 0.00E+00 | transcription_start_site | - | 261126 | 261126 | -1257 | 12940 | AN2596 |
| 39 CONTIG43   | 262216 | 262551 | 3.48 | 0.00E+00 | transcription_start_site | - | 260929 | 260929 | -1454 | 12941 | AN2596 |
| 39 CONTIG43   | 262216 | 262551 | 3.48 | 0.00E+00 | transcription_start_site | - | 260548 | 260548 | -1835 | 12942 | AN2596 |
| 39 CONTIG43   | 262216 | 262551 | 3.48 | 0.00E+00 | transcription_start_site | - | 260167 | 260167 | -2216 | 12943 | AN2596 |
| 309 CONTIG43  | 262667 | 263616 | 2.75 | 0.00E+00 | transcription_start_site | - | 262055 | 262055 | -1086 | 12937 | AN2596 |
| 309 CONTIG43  | 262667 | 263616 | 2.75 | 0.00E+00 | transcription_start_site | - | 261675 | 261675 | -1466 | 12938 | AN2596 |
| 309 CONTIG43  | 262667 | 263616 | 2.75 | 0.00E+00 | transcription_start_site | - | 261279 | 261279 | -1862 | 12939 | AN2596 |
| 309 CONTIG43  | 262667 | 263616 | 2.75 | 0.00E+00 | transcription_start_site | - | 261126 | 261126 | -2015 | 12940 | AN2596 |
| 309 CONTIG43  | 262667 | 263616 | 2.75 | 0.00E+00 | transcription_start_site | - | 260929 | 260929 | -2212 | 12941 | AN2596 |

|      |          |        |        |      |          |                          |   |        |        |       |       |        |
|------|----------|--------|--------|------|----------|--------------------------|---|--------|--------|-------|-------|--------|
| 309  | CONTIG43 | 262667 | 263616 | 2.75 | 0.00E+00 | transcription_start_site | - | 260548 | 260548 | -2593 | 12942 | AN2596 |
| 309  | CONTIG43 | 262667 | 263616 | 2.75 | 0.00E+00 | transcription_start_site | - | 260167 | 260167 | -2974 | 12943 | AN2596 |
| 39   | CONTIG43 | 262216 | 262551 | 3.48 | 0.00E+00 | transcription_start_site | + | 263523 | 263523 | -1139 | 12944 | AN2597 |
| 39   | CONTIG43 | 262216 | 262551 | 3.48 | 0.00E+00 | transcription_start_site | + | 263678 | 263678 | -1294 | 12945 | AN2597 |
| 309  | CONTIG43 | 262667 | 263616 | 2.75 | 0.00E+00 | transcription_start_site | + | 263523 | 263523 | -381  | 12944 | AN2597 |
| 309  | CONTIG43 | 262667 | 263616 | 2.75 | 0.00E+00 | transcription_start_site | + | 263678 | 263678 | -536  | 12945 | AN2597 |
| 2713 | CONTIG43 | 281255 | 281769 | 1.12 | 1.66E-01 | transcription_start_site | + | 281090 | 281090 | 422   | 12973 | AN2602 |
| 2713 | CONTIG43 | 281255 | 281769 | 1.12 | 1.66E-01 | transcription_start_site | + | 280970 | 280970 | 542   | 12972 | AN2602 |
| 2713 | CONTIG43 | 281255 | 281769 | 1.12 | 1.66E-01 | transcription_start_site | + | 280421 | 280421 | 1091  | 12971 | AN2602 |
| 2713 | CONTIG43 | 281255 | 281769 | 1.12 | 1.66E-01 | transcription_start_site | + | 281777 | 281777 | -265  | 12974 | AN2603 |
| 2713 | CONTIG43 | 281255 | 281769 | 1.12 | 1.66E-01 | transcription_start_site | + | 281999 | 281999 | -487  | 12975 | AN2603 |
| 2713 | CONTIG43 | 281255 | 281769 | 1.12 | 1.66E-01 | transcription_start_site | + | 282971 | 282971 | -1459 | 12976 | AN2603 |
| 2713 | CONTIG43 | 281255 | 281769 | 1.12 | 1.66E-01 | transcription_start_site | + | 283124 | 283124 | -1612 | 12977 | AN2603 |
| 2713 | CONTIG43 | 281255 | 281769 | 1.12 | 1.66E-01 | transcription_start_site | + | 283308 | 283308 | -1796 | 12978 | AN2603 |
| 2713 | CONTIG43 | 281255 | 281769 | 1.12 | 1.66E-01 | transcription_start_site | + | 283671 | 283671 | -2159 | 12979 | AN2603 |
| 2514 | CONTIG43 | 310145 | 310709 | 1.2  | 1.25E-01 | transcription_start_site | - | 305543 | 305543 | -4884 | 12995 | AN2609 |
| 2514 | CONTIG43 | 310145 | 310709 | 1.2  | 1.25E-01 | transcription_start_site | - | 305285 | 305285 | -5142 | 12996 | AN2609 |
| 2108 | CONTIG43 | 312010 | 312519 | 1.33 | 8.01E-02 | transcription_start_site | - | 309412 | 309412 | -2852 | 12999 | AN2610 |
| 2108 | CONTIG43 | 312010 | 312519 | 1.33 | 8.01E-02 | transcription_start_site | - | 309014 | 309014 | -3250 | 13000 | AN2610 |
| 2108 | CONTIG43 | 312010 | 312519 | 1.33 | 8.01E-02 | transcription_start_site | - | 308707 | 308707 | -3557 | 13001 | AN2610 |
| 2108 | CONTIG43 | 312010 | 312519 | 1.33 | 8.01E-02 | transcription_start_site | - | 308520 | 308520 | -3744 | 13002 | AN2610 |
| 2514 | CONTIG43 | 310145 | 310709 | 1.2  | 1.25E-01 | transcription_start_site | - | 309412 | 309412 | -1015 | 12999 | AN2610 |
| 2514 | CONTIG43 | 310145 | 310709 | 1.2  | 1.25E-01 | transcription_start_site | - | 309014 | 309014 | -1413 | 13000 | AN2610 |
| 2514 | CONTIG43 | 310145 | 310709 | 1.2  | 1.25E-01 | transcription_start_site | - | 308707 | 308707 | -1720 | 13001 | AN2610 |
| 2514 | CONTIG43 | 310145 | 310709 | 1.2  | 1.25E-01 | transcription_start_site | - | 308520 | 308520 | -1907 | 13002 | AN2610 |
| 1197 | CONTIG43 | 316956 | 317253 | 1.76 | 1.57E-02 | transcription_start_site | - | 315713 | 315713 | -1391 | 13003 | AN2611 |
| 1197 | CONTIG43 | 316956 | 317253 | 1.76 | 1.57E-02 | transcription_start_site | - | 315342 | 315342 | -1762 | 13004 | AN2611 |
| 1197 | CONTIG43 | 316956 | 317253 | 1.76 | 1.57E-02 | transcription_start_site | - | 314977 | 314977 | -2127 | 13005 | AN2611 |
| 1197 | CONTIG43 | 316956 | 317253 | 1.76 | 1.57E-02 | transcription_start_site | - | 314202 | 314202 | -2902 | 13006 | AN2611 |
| 1197 | CONTIG43 | 316956 | 317253 | 1.76 | 1.57E-02 | transcription_start_site | - | 314031 | 314031 | -3073 | 13007 | AN2611 |
| 1197 | CONTIG43 | 316956 | 317253 | 1.76 | 1.57E-02 | transcription_start_site | - | 313083 | 313083 | -4021 | 13008 | AN2611 |
| 1197 | CONTIG43 | 316956 | 317253 | 1.76 | 1.57E-02 | transcription_start_site | - | 312933 | 312933 | -4171 | 13009 | AN2611 |
| 1198 | CONTIG43 | 318993 | 319787 | 1.76 | 1.57E-02 | transcription_start_site | - | 315713 | 315713 | -3677 | 13003 | AN2611 |
| 1198 | CONTIG43 | 318993 | 319787 | 1.76 | 1.57E-02 | transcription_start_site | - | 315342 | 315342 | -4048 | 13004 | AN2611 |
| 1198 | CONTIG43 | 318993 | 319787 | 1.76 | 1.57E-02 | transcription_start_site | - | 314977 | 314977 | -4413 | 13005 | AN2611 |
| 1198 | CONTIG43 | 318993 | 319787 | 1.76 | 1.57E-02 | transcription_start_site | - | 314202 | 314202 | -5188 | 13006 | AN2611 |
| 1198 | CONTIG43 | 318993 | 319787 | 1.76 | 1.57E-02 | transcription_start_site | - | 314031 | 314031 | -5359 | 13007 | AN2611 |
| 2108 | CONTIG43 | 312010 | 312519 | 1.33 | 8.01E-02 | transcription_start_site | - | 312933 | 312933 | 668   | 13009 | AN2611 |
| 2108 | CONTIG43 | 312010 | 312519 | 1.33 | 8.01E-02 | transcription_start_site | - | 313083 | 313083 | 818   | 13008 | AN2611 |
| 1198 | CONTIG43 | 318993 | 319787 | 1.76 | 1.57E-02 | transcription_start_site | - | 320118 | 320118 | 728   | 13012 | AN2612 |
| 1198 | CONTIG43 | 318993 | 319787 | 1.76 | 1.57E-02 | transcription_start_site | - | 318622 | 318622 | -768  | 13013 | AN2612 |
| 1198 | CONTIG43 | 318993 | 319787 | 1.76 | 1.57E-02 | transcription_start_site | - | 320784 | 320784 | 1394  | 13011 | AN2612 |
| 1692 | CONTIG43 | 324603 | 325028 | 1.5  | 4.36E-02 | transcription_start_site | - | 320931 | 320931 | -3884 | 13010 | AN2612 |
| 1692 | CONTIG43 | 324603 | 325028 | 1.5  | 4.36E-02 | transcription_start_site | - | 320784 | 320784 | -4031 | 13011 | AN2612 |
| 1692 | CONTIG43 | 324603 | 325028 | 1.5  | 4.36E-02 | transcription_start_site | - | 320118 | 320118 | -4697 | 13012 | AN2612 |
| 1197 | CONTIG43 | 316956 | 317253 | 1.76 | 1.57E-02 | transcription_start_site | + | 321553 | 321553 | -4448 | 13014 | AN2613 |
| 1197 | CONTIG43 | 316956 | 317253 | 1.76 | 1.57E-02 | transcription_start_site | + | 321896 | 321896 | -4791 | 13015 | AN2613 |
| 1198 | CONTIG43 | 318993 | 319787 | 1.76 | 1.57E-02 | transcription_start_site | + | 321553 | 321553 | -2163 | 13014 | AN2613 |
| 1198 | CONTIG43 | 318993 | 319787 | 1.76 | 1.57E-02 | transcription_start_site | + | 321896 | 321896 | -2506 | 13015 | AN2613 |
| 1198 | CONTIG43 | 318993 | 319787 | 1.76 | 1.57E-02 | transcription_start_site | + | 322457 | 322457 | -3067 | 13016 | AN2613 |
| 1692 | CONTIG43 | 324603 | 325028 | 1.5  | 4.36E-02 | transcription_start_site | + | 325250 | 325250 | -434  | 13017 | AN2614 |
| 1692 | CONTIG43 | 324603 | 325028 | 1.5  | 4.36E-02 | transcription_start_site | + | 325356 | 325356 | -540  | 13018 | AN2614 |
| 1692 | CONTIG43 | 324603 | 325028 | 1.5  | 4.36E-02 | transcription_start_site | + | 325526 | 325526 | -710  | 13019 | AN2614 |
| 1692 | CONTIG43 | 324603 | 325028 | 1.5  | 4.36E-02 | transcription_start_site | + | 325935 | 325935 | -1119 | 13020 | AN2614 |
| 1692 | CONTIG43 | 324603 | 325028 | 1.5  | 4.36E-02 | transcription_start_site | + | 326128 | 326128 | -1312 | 13021 | AN2614 |
| 1688 | CONTIG43 | 329570 | 330214 | 1.5  | 2.64E-02 | transcription_start_site | + | 330048 | 330048 | -156  | 13023 | AN2615 |
| 1688 | CONTIG43 | 329570 | 330214 | 1.5  | 2.64E-02 | transcription_start_site | + | 329674 | 329674 | 218   | 13022 | AN2615 |

|      |          |        |        |      |          |                          |   |        |        |       |       |        |
|------|----------|--------|--------|------|----------|--------------------------|---|--------|--------|-------|-------|--------|
| 1692 | CONTIG43 | 324603 | 325028 | 1.5  | 4.36E-02 | transcription_start_site | + | 329674 | 329674 | -4858 | 13022 | AN2615 |
| 3036 | CONTIG45 | 6171   | 6575   | 0.81 | 1.28E-01 | transcription_start_site | + | 6277   | 6277   | 96    | 13033 | AN2619 |
| 3036 | CONTIG45 | 6171   | 6575   | 0.81 | 1.28E-01 | transcription_start_site | + | 6902   | 6902   | -529  | 13034 | AN2619 |
| 3036 | CONTIG45 | 6171   | 6575   | 0.81 | 1.28E-01 | transcription_start_site | + | 7246   | 7246   | -873  | 13035 | AN2619 |
| 2427 | CONTIG45 | 29036  | 29310  | 1.22 | 1.57E-02 | transcription_start_site | - | 26703  | 26703  | -2470 | 13050 | AN2621 |
| 2427 | CONTIG45 | 29036  | 29310  | 1.22 | 1.57E-02 | transcription_start_site | + | 29384  | 29384  | -211  | 13052 | AN2623 |
| 2427 | CONTIG45 | 29036  | 29310  | 1.22 | 1.57E-02 | transcription_start_site | + | 29473  | 29473  | -300  | 13053 | AN2623 |
| 2427 | CONTIG45 | 29036  | 29310  | 1.22 | 1.57E-02 | transcription_start_site | + | 29703  | 29703  | -530  | 13054 | AN2623 |
| 2427 | CONTIG45 | 29036  | 29310  | 1.22 | 1.57E-02 | transcription_start_site | + | 29914  | 29914  | -741  | 13055 | AN2623 |
| 1150 | CONTIG45 | 43293  | 43642  | 1.79 | 2.16E-04 | transcription_start_site | - | 42339  | 42339  | -1128 | 13063 | AN2626 |
| 1150 | CONTIG45 | 43293  | 43642  | 1.79 | 2.16E-04 | transcription_start_site | - | 42115  | 42115  | -1352 | 13064 | AN2626 |
| 1150 | CONTIG45 | 43293  | 43642  | 1.79 | 2.16E-04 | transcription_start_site | - | 41683  | 41683  | -1784 | 13065 | AN2626 |
| 2739 | CONTIG45 | 41180  | 41614  | 1.1  | 3.08E-02 | transcription_start_site | - | 41683  | 41683  | 286   | 13065 | AN2626 |
| 2739 | CONTIG45 | 41180  | 41614  | 1.1  | 3.08E-02 | transcription_start_site | - | 42115  | 42115  | 718   | 13064 | AN2626 |
| 2739 | CONTIG45 | 41180  | 41614  | 1.1  | 3.08E-02 | transcription_start_site | - | 42339  | 42339  | 942   | 13063 | AN2626 |
| 703  | CONTIG46 | 8701   | 9050   | 2.19 | 2.32E-03 | transcription_start_site | - | 5274   | 5274   | -3601 | 13092 | AN2637 |
| 1727 | CONTIG46 | 9696   | 9970   | 1.49 | 6.84E-02 | transcription_start_site | - | 5274   | 5274   | -4559 | 13092 | AN2637 |
| 703  | CONTIG46 | 8701   | 9050   | 2.19 | 2.32E-03 | transcription_start_site | - | 8360   | 8360   | -515  | 13093 | AN2638 |
| 703  | CONTIG46 | 8701   | 9050   | 2.19 | 2.32E-03 | transcription_start_site | - | 8022   | 8022   | -853  | 13094 | AN2638 |
| 1727 | CONTIG46 | 9696   | 9970   | 1.49 | 6.84E-02 | transcription_start_site | - | 8360   | 8360   | -1473 | 13093 | AN2638 |
| 1727 | CONTIG46 | 9696   | 9970   | 1.49 | 6.84E-02 | transcription_start_site | - | 8022   | 8022   | -1811 | 13094 | AN2638 |
| 703  | CONTIG46 | 8701   | 9050   | 2.19 | 2.32E-03 | transcription_start_site | + | 9779   | 9779   | -903  | 13095 | AN2639 |
| 703  | CONTIG46 | 8701   | 9050   | 2.19 | 2.32E-03 | transcription_start_site | + | 9876   | 9876   | -1000 | 13096 | AN2639 |
| 703  | CONTIG46 | 8701   | 9050   | 2.19 | 2.32E-03 | transcription_start_site | + | 10545  | 10545  | -1669 | 13097 | AN2639 |
| 1727 | CONTIG46 | 9696   | 9970   | 1.49 | 6.84E-02 | transcription_start_site | + | 9876   | 9876   | -43   | 13096 | AN2639 |
| 1727 | CONTIG46 | 9696   | 9970   | 1.49 | 6.84E-02 | transcription_start_site | + | 9779   | 9779   | 54    | 13095 | AN2639 |
| 1727 | CONTIG46 | 9696   | 9970   | 1.49 | 6.84E-02 | transcription_start_site | + | 10545  | 10545  | -712  | 13097 | AN2639 |
| 703  | CONTIG46 | 8701   | 9050   | 2.19 | 2.32E-03 | transcription_start_site | + | 11716  | 11716  | -2840 | 13098 | AN2640 |
| 1727 | CONTIG46 | 9696   | 9970   | 1.49 | 6.84E-02 | transcription_start_site | + | 11716  | 11716  | -1883 | 13098 | AN2640 |
| 1254 | CONTIG46 | 23942  | 24426  | 1.72 | 1.81E-02 | transcription_start_site | - | 19972  | 19972  | -4212 | 13099 | AN2642 |
| 1254 | CONTIG46 | 23942  | 24426  | 1.72 | 1.81E-02 | transcription_start_site | - | 19814  | 19814  | -4370 | 13100 | AN2642 |
| 1254 | CONTIG46 | 23942  | 24426  | 1.72 | 1.81E-02 | transcription_start_site | - | 19598  | 19598  | -4586 | 13101 | AN2642 |
| 1254 | CONTIG46 | 23942  | 24426  | 1.72 | 1.81E-02 | transcription_start_site | - | 19332  | 19332  | -4852 | 13102 | AN2642 |
| 1254 | CONTIG46 | 23942  | 24426  | 1.72 | 1.81E-02 | transcription_start_site | - | 19067  | 19067  | -5117 | 13103 | AN2642 |
| 1254 | CONTIG46 | 23942  | 24426  | 1.72 | 1.81E-02 | transcription_start_site | - | 23240  | 23240  | -944  | 13104 | AN2643 |
| 1254 | CONTIG46 | 23942  | 24426  | 1.72 | 1.81E-02 | transcription_start_site | - | 22963  | 22963  | -1221 | 13105 | AN2643 |
| 1254 | CONTIG46 | 23942  | 24426  | 1.72 | 1.81E-02 | transcription_start_site | - | 22385  | 22385  | -1799 | 13106 | AN2643 |
| 1254 | CONTIG46 | 23942  | 24426  | 1.72 | 1.81E-02 | transcription_start_site | - | 22154  | 22154  | -2030 | 13107 | AN2643 |
| 1254 | CONTIG46 | 23942  | 24426  | 1.72 | 1.81E-02 | transcription_start_site | - | 21730  | 21730  | -2454 | 13108 | AN2643 |
| 1254 | CONTIG46 | 23942  | 24426  | 1.72 | 1.81E-02 | transcription_start_site | + | 23759  | 23759  | 425   | 13109 | AN2644 |
| 1254 | CONTIG46 | 23942  | 24426  | 1.72 | 1.81E-02 | transcription_start_site | + | 25421  | 25421  | -1237 | 13110 | AN2644 |
| 1254 | CONTIG46 | 23942  | 24426  | 1.72 | 1.81E-02 | transcription_start_site | + | 26758  | 26758  | -2574 | 13111 | AN2645 |
| 1254 | CONTIG46 | 23942  | 24426  | 1.72 | 1.81E-02 | transcription_start_site | + | 26947  | 26947  | -2763 | 13112 | AN2645 |
| 1254 | CONTIG46 | 23942  | 24426  | 1.72 | 1.81E-02 | transcription_start_site | + | 27382  | 27382  | -3198 | 13113 | AN2645 |
| 1254 | CONTIG46 | 23942  | 24426  | 1.72 | 1.81E-02 | transcription_start_site | + | 27616  | 27616  | -3432 | 13114 | AN2645 |
| 129  | CONTIG46 | 37145  | 37704  | 3.12 | 0.00E+00 | transcription_start_site | - | 37101  | 37101  | -323  | 13130 | AN2648 |
| 129  | CONTIG46 | 37145  | 37704  | 3.12 | 0.00E+00 | transcription_start_site | - | 36785  | 36785  | -639  | 13131 | AN2648 |
| 129  | CONTIG46 | 37145  | 37704  | 3.12 | 0.00E+00 | transcription_start_site | - | 36530  | 36530  | -894  | 13132 | AN2648 |
| 129  | CONTIG46 | 37145  | 37704  | 3.12 | 0.00E+00 | transcription_start_site | + | 38445  | 38445  | -1020 | 13133 | AN2649 |
| 129  | CONTIG46 | 37145  | 37704  | 3.12 | 0.00E+00 | transcription_start_site | + | 38652  | 38652  | -1227 | 13134 | AN2649 |
| 129  | CONTIG46 | 37145  | 37704  | 3.12 | 0.00E+00 | transcription_start_site | + | 39101  | 39101  | -1676 | 13135 | AN2649 |
| 129  | CONTIG46 | 37145  | 37704  | 3.12 | 0.00E+00 | transcription_start_site | + | 39889  | 39889  | -2464 | 13136 | AN2649 |
| 129  | CONTIG46 | 37145  | 37704  | 3.12 | 0.00E+00 | transcription_start_site | + | 40077  | 40077  | -2652 | 13137 | AN2649 |
| 2062 | CONTIG46 | 63003  | 64027  | 1.35 | 9.26E-02 | transcription_start_site | - | 59557  | 59557  | -3958 | 13169 | AN2657 |
| 2062 | CONTIG46 | 63003  | 64027  | 1.35 | 9.26E-02 | transcription_start_site | - | 58604  | 58604  | -4911 | 13170 | AN2657 |
| 2198 | CONTIG46 | 59643  | 60592  | 1.3  | 1.09E-01 | transcription_start_site | - | 59557  | 59557  | -560  | 13169 | AN2657 |
| 2198 | CONTIG46 | 59643  | 60592  | 1.3  | 1.09E-01 | transcription_start_site | - | 58604  | 58604  | -1513 | 13170 | AN2657 |

|               |       |       |      |          |                          |   |       |       |       |       |        |
|---------------|-------|-------|------|----------|--------------------------|---|-------|-------|-------|-------|--------|
| 2627 CONTIG46 | 61203 | 61482 | 1.16 | 1.93E-01 | transcription_start_site | - | 59557 | 59557 | -1785 | 13169 | AN2657 |
| 2627 CONTIG46 | 61203 | 61482 | 1.16 | 1.93E-01 | transcription_start_site | - | 58604 | 58604 | -2738 | 13170 | AN2657 |
| 2062 CONTIG46 | 63003 | 64027 | 1.35 | 9.26E-02 | transcription_start_site | - | 62290 | 62290 | -1225 | 13171 | AN2658 |
| 2062 CONTIG46 | 63003 | 64027 | 1.35 | 9.26E-02 | transcription_start_site | - | 62042 | 62042 | -1473 | 13172 | AN2658 |
| 2062 CONTIG46 | 63003 | 64027 | 1.35 | 9.26E-02 | transcription_start_site | - | 61778 | 61778 | -1737 | 13173 | AN2658 |
| 2062 CONTIG46 | 63003 | 64027 | 1.35 | 9.26E-02 | transcription_start_site | - | 61182 | 61182 | -2333 | 13174 | AN2658 |
| 2062 CONTIG46 | 63003 | 64027 | 1.35 | 9.26E-02 | transcription_start_site | - | 60715 | 60715 | -2800 | 13175 | AN2658 |
| 2062 CONTIG46 | 63003 | 64027 | 1.35 | 9.26E-02 | transcription_start_site | - | 60487 | 60487 | -3028 | 13176 | AN2658 |
| 2062 CONTIG46 | 63003 | 64027 | 1.35 | 9.26E-02 | transcription_start_site | - | 60178 | 60178 | -3337 | 13177 | AN2658 |
| 2198 CONTIG46 | 59643 | 60592 | 1.3  | 1.09E-01 | transcription_start_site | - | 60178 | 60178 | 60    | 13177 | AN2658 |
| 2198 CONTIG46 | 59643 | 60592 | 1.3  | 1.09E-01 | transcription_start_site | - | 60487 | 60487 | 369   | 13176 | AN2658 |
| 2198 CONTIG46 | 59643 | 60592 | 1.3  | 1.09E-01 | transcription_start_site | - | 60715 | 60715 | 597   | 13175 | AN2658 |
| 2198 CONTIG46 | 59643 | 60592 | 1.3  | 1.09E-01 | transcription_start_site | - | 61182 | 61182 | 1064  | 13174 | AN2658 |
| 2627 CONTIG46 | 61203 | 61482 | 1.16 | 1.93E-01 | transcription_start_site | - | 61182 | 61182 | -160  | 13174 | AN2658 |
| 2627 CONTIG46 | 61203 | 61482 | 1.16 | 1.93E-01 | transcription_start_site | - | 61778 | 61778 | 435   | 13173 | AN2658 |
| 2627 CONTIG46 | 61203 | 61482 | 1.16 | 1.93E-01 | transcription_start_site | - | 60715 | 60715 | -627  | 13175 | AN2658 |
| 2627 CONTIG46 | 61203 | 61482 | 1.16 | 1.93E-01 | transcription_start_site | - | 62042 | 62042 | 699   | 13172 | AN2658 |
| 2627 CONTIG46 | 61203 | 61482 | 1.16 | 1.93E-01 | transcription_start_site | - | 60487 | 60487 | -855  | 13176 | AN2658 |
| 2627 CONTIG46 | 61203 | 61482 | 1.16 | 1.93E-01 | transcription_start_site | - | 62290 | 62290 | 947   | 13171 | AN2658 |
| 2627 CONTIG46 | 61203 | 61482 | 1.16 | 1.93E-01 | transcription_start_site | - | 60178 | 60178 | -1164 | 13177 | AN2658 |
| 2062 CONTIG46 | 63003 | 64027 | 1.35 | 9.26E-02 | transcription_start_site | + | 63543 | 63543 | -28   | 13178 | AN2659 |
| 2062 CONTIG46 | 63003 | 64027 | 1.35 | 9.26E-02 | transcription_start_site | + | 63940 | 63940 | -425  | 13179 | AN2659 |
| 2062 CONTIG46 | 63003 | 64027 | 1.35 | 9.26E-02 | transcription_start_site | + | 64908 | 64908 | -1393 | 13180 | AN2659 |
| 2062 CONTIG46 | 63003 | 64027 | 1.35 | 9.26E-02 | transcription_start_site | + | 65020 | 65020 | -1505 | 13181 | AN2659 |
| 2198 CONTIG46 | 59643 | 60592 | 1.3  | 1.09E-01 | transcription_start_site | + | 63543 | 63543 | -3425 | 13178 | AN2659 |
| 2198 CONTIG46 | 59643 | 60592 | 1.3  | 1.09E-01 | transcription_start_site | + | 63940 | 63940 | -3822 | 13179 | AN2659 |
| 2198 CONTIG46 | 59643 | 60592 | 1.3  | 1.09E-01 | transcription_start_site | + | 64908 | 64908 | -4790 | 13180 | AN2659 |
| 2198 CONTIG46 | 59643 | 60592 | 1.3  | 1.09E-01 | transcription_start_site | + | 65020 | 65020 | -4902 | 13181 | AN2659 |
| 2627 CONTIG46 | 61203 | 61482 | 1.16 | 1.93E-01 | transcription_start_site | + | 63543 | 63543 | -2200 | 13178 | AN2659 |
| 2627 CONTIG46 | 61203 | 61482 | 1.16 | 1.93E-01 | transcription_start_site | + | 63940 | 63940 | -2597 | 13179 | AN2659 |
| 2627 CONTIG46 | 61203 | 61482 | 1.16 | 1.93E-01 | transcription_start_site | + | 64908 | 64908 | -3565 | 13180 | AN2659 |
| 2627 CONTIG46 | 61203 | 61482 | 1.16 | 1.93E-01 | transcription_start_site | + | 65020 | 65020 | -3677 | 13181 | AN2659 |
| 1623 CONTIG46 | 93534 | 93909 | 1.53 | 5.88E-02 | transcription_start_site | - | 90495 | 90495 | -3226 | 13214 | AN2667 |
| 1623 CONTIG46 | 93534 | 93909 | 1.53 | 5.88E-02 | transcription_start_site | - | 90278 | 90278 | -3443 | 13215 | AN2667 |
| 1623 CONTIG46 | 93534 | 93909 | 1.53 | 5.88E-02 | transcription_start_site | - | 92496 | 92496 | -1225 | 13217 | AN2668 |
| 1623 CONTIG46 | 93534 | 93909 | 1.53 | 5.88E-02 | transcription_start_site | - | 92311 | 92311 | -1410 | 13218 | AN2668 |
| 1623 CONTIG46 | 93534 | 93909 | 1.53 | 5.88E-02 | transcription_start_site | - | 92109 | 92109 | -1612 | 13219 | AN2668 |
| 1623 CONTIG46 | 93534 | 93909 | 1.53 | 5.88E-02 | transcription_start_site | - | 91983 | 91983 | -1738 | 13220 | AN2668 |
| 1623 CONTIG46 | 93534 | 93909 | 1.53 | 5.88E-02 | transcription_start_site | - | 91524 | 91524 | -2197 | 13221 | AN2668 |
| 1623 CONTIG46 | 93534 | 93909 | 1.53 | 5.88E-02 | transcription_start_site | - | 91295 | 91295 | -2426 | 13222 | AN2668 |
| 1623 CONTIG46 | 93534 | 93909 | 1.53 | 5.88E-02 | transcription_start_site | + | 95591 | 95591 | -1869 | 13223 | AN2669 |
| 2605 CONTIG47 | 18545 | 18884 | 1.16 | 8.01E-02 | transcription_start_site | - | 14958 | 14958 | -3756 | 13235 | AN2673 |
| 2605 CONTIG47 | 18545 | 18884 | 1.16 | 8.01E-02 | transcription_start_site | - | 14401 | 14401 | -4313 | 13236 | AN2673 |
| 2605 CONTIG47 | 18545 | 18884 | 1.16 | 8.01E-02 | transcription_start_site | - | 13684 | 13684 | -5030 | 13237 | AN2673 |
| 2605 CONTIG47 | 18545 | 18884 | 1.16 | 8.01E-02 | transcription_start_site | - | 13580 | 13580 | -5134 | 13238 | AN2673 |
| 619 CONTIG47  | 20630 | 20909 | 2.28 | 2.39E-04 | transcription_start_site | - | 18605 | 18605 | -2164 | 13240 | AN2674 |
| 619 CONTIG47  | 20630 | 20909 | 2.28 | 2.39E-04 | transcription_start_site | - | 18396 | 18396 | -2373 | 13241 | AN2674 |
| 619 CONTIG47  | 20630 | 20909 | 2.28 | 2.39E-04 | transcription_start_site | - | 18152 | 18152 | -2617 | 13242 | AN2674 |
| 619 CONTIG47  | 20630 | 20909 | 2.28 | 2.39E-04 | transcription_start_site | - | 17620 | 17620 | -3149 | 13243 | AN2674 |
| 619 CONTIG47  | 20630 | 20909 | 2.28 | 2.39E-04 | transcription_start_site | - | 17106 | 17106 | -3663 | 13244 | AN2674 |
| 2605 CONTIG47 | 18545 | 18884 | 1.16 | 8.01E-02 | transcription_start_site | - | 18605 | 18605 | -109  | 13240 | AN2674 |
| 2605 CONTIG47 | 18545 | 18884 | 1.16 | 8.01E-02 | transcription_start_site | - | 18396 | 18396 | -318  | 13241 | AN2674 |
| 2605 CONTIG47 | 18545 | 18884 | 1.16 | 8.01E-02 | transcription_start_site | - | 18152 | 18152 | -562  | 13242 | AN2674 |
| 2605 CONTIG47 | 18545 | 18884 | 1.16 | 8.01E-02 | transcription_start_site | - | 17620 | 17620 | -1094 | 13243 | AN2674 |
| 2605 CONTIG47 | 18545 | 18884 | 1.16 | 8.01E-02 | transcription_start_site | - | 17106 | 17106 | -1608 | 13244 | AN2674 |
| 619 CONTIG47  | 20630 | 20909 | 2.28 | 2.39E-04 | transcription_start_site | - | 20575 | 20575 | -194  | 13245 | AN2675 |
| 619 CONTIG47  | 20630 | 20909 | 2.28 | 2.39E-04 | transcription_start_site | - | 20327 | 20327 | -442  | 13246 | AN2675 |

|      |          |       |       |      |          |                          |   |       |       |       |       |        |
|------|----------|-------|-------|------|----------|--------------------------|---|-------|-------|-------|-------|--------|
| 619  | CONTIG47 | 20630 | 20909 | 2.28 | 2.39E-04 | transcription_start_site | - | 19786 | 19786 | -983  | 13247 | AN2675 |
| 2605 | CONTIG47 | 18545 | 18884 | 1.16 | 8.01E-02 | transcription_start_site | - | 19786 | 19786 | 1071  | 13247 | AN2675 |
| 2503 | CONTIG47 | 32480 | 32914 | 1.2  | 6.84E-02 | transcription_start_site | - | 30548 | 30548 | -2149 | 13250 | AN2677 |
| 2503 | CONTIG47 | 32480 | 32914 | 1.2  | 6.84E-02 | transcription_start_site | - | 30381 | 30381 | -2316 | 13251 | AN2677 |
| 2503 | CONTIG47 | 32480 | 32914 | 1.2  | 6.84E-02 | transcription_start_site | - | 29872 | 29872 | -2825 | 13252 | AN2677 |
| 2503 | CONTIG47 | 32480 | 32914 | 1.2  | 6.84E-02 | transcription_start_site | - | 29053 | 29053 | -3644 | 13253 | AN2677 |
| 2503 | CONTIG47 | 32480 | 32914 | 1.2  | 6.84E-02 | transcription_start_site | - | 28801 | 28801 | -3896 | 13254 | AN2677 |
| 2503 | CONTIG47 | 32480 | 32914 | 1.2  | 6.84E-02 | transcription_start_site | - | 32356 | 32356 | -341  | 13255 | AN2678 |
| 2503 | CONTIG47 | 32480 | 32914 | 1.2  | 6.84E-02 | transcription_start_site | + | 32961 | 32961 | -264  | 13256 | AN2679 |
| 2503 | CONTIG47 | 32480 | 32914 | 1.2  | 6.84E-02 | transcription_start_site | + | 33275 | 33275 | -578  | 13257 | AN2679 |
| 2503 | CONTIG47 | 32480 | 32914 | 1.2  | 6.84E-02 | transcription_start_site | + | 33777 | 33777 | -1080 | 13258 | AN2679 |
| 2503 | CONTIG47 | 32480 | 32914 | 1.2  | 6.84E-02 | transcription_start_site | + | 33948 | 33948 | -1251 | 13259 | AN2679 |
| 2503 | CONTIG47 | 32480 | 32914 | 1.2  | 6.84E-02 | transcription_start_site | + | 36453 | 36453 | -3756 | 13260 | AN2680 |
| 2503 | CONTIG47 | 32480 | 32914 | 1.2  | 6.84E-02 | transcription_start_site | + | 36686 | 36686 | -3989 | 13261 | AN2680 |
| 2503 | CONTIG47 | 32480 | 32914 | 1.2  | 6.84E-02 | transcription_start_site | + | 36820 | 36820 | -4123 | 13262 | AN2680 |
| 2503 | CONTIG47 | 32480 | 32914 | 1.2  | 6.84E-02 | transcription_start_site | + | 37234 | 37234 | -4537 | 13263 | AN2680 |
| 2824 | CONTIG47 | 42385 | 43559 | 1.05 | 1.07E-01 | transcription_start_site | - | 40241 | 40241 | -2731 | 13264 | AN2681 |
| 2824 | CONTIG47 | 42385 | 43559 | 1.05 | 1.07E-01 | transcription_start_site | - | 40192 | 40192 | -2780 | 13265 | AN2681 |
| 2824 | CONTIG47 | 42385 | 43559 | 1.05 | 1.07E-01 | transcription_start_site | - | 40018 | 40018 | -2954 | 13266 | AN2681 |
| 2824 | CONTIG47 | 42385 | 43559 | 1.05 | 1.07E-01 | transcription_start_site | - | 39691 | 39691 | -3281 | 13267 | AN2681 |
| 2824 | CONTIG47 | 42385 | 43559 | 1.05 | 1.07E-01 | transcription_start_site | - | 39346 | 39346 | -3626 | 13268 | AN2681 |
| 2824 | CONTIG47 | 42385 | 43559 | 1.05 | 1.07E-01 | transcription_start_site | - | 38849 | 38849 | -4123 | 13269 | AN2681 |
| 2824 | CONTIG47 | 42385 | 43559 | 1.05 | 1.07E-01 | transcription_start_site | - | 38536 | 38536 | -4436 | 13270 | AN2681 |
| 2824 | CONTIG47 | 42385 | 43559 | 1.05 | 1.07E-01 | transcription_start_site | - | 42921 | 42921 | -51   | 13272 | AN2682 |
| 2824 | CONTIG47 | 42385 | 43559 | 1.05 | 1.07E-01 | transcription_start_site | - | 43224 | 43224 | 252   | 13271 | AN2682 |
| 2824 | CONTIG47 | 42385 | 43559 | 1.05 | 1.07E-01 | transcription_start_site | - | 42224 | 42224 | -748  | 13273 | AN2682 |
| 2824 | CONTIG47 | 42385 | 43559 | 1.05 | 1.07E-01 | transcription_start_site | + | 46468 | 46468 | -3496 | 13274 | AN2683 |
| 2824 | CONTIG47 | 42385 | 43559 | 1.05 | 1.07E-01 | transcription_start_site | + | 46599 | 46599 | -3627 | 13275 | AN2683 |
| 2824 | CONTIG47 | 42385 | 43559 | 1.05 | 1.07E-01 | transcription_start_site | + | 46749 | 46749 | -3777 | 13276 | AN2683 |
| 2824 | CONTIG47 | 42385 | 43559 | 1.05 | 1.07E-01 | transcription_start_site | + | 46852 | 46852 | -3880 | 13277 | AN2683 |
| 2824 | CONTIG47 | 42385 | 43559 | 1.05 | 1.07E-01 | transcription_start_site | + | 47496 | 47496 | -4524 | 13278 | AN2683 |
| 2892 | CONTIG47 | 50345 | 50614 | 1.01 | 1.44E-01 | transcription_start_site | - | 50350 | 50350 | -129  | 13279 | AN2684 |
| 2892 | CONTIG47 | 50345 | 50614 | 1.01 | 1.44E-01 | transcription_start_site | - | 50282 | 50282 | -197  | 13280 | AN2684 |
| 2892 | CONTIG47 | 50345 | 50614 | 1.01 | 1.44E-01 | transcription_start_site | - | 49393 | 49393 | -1086 | 13281 | AN2684 |
| 2892 | CONTIG47 | 50345 | 50614 | 1.01 | 1.44E-01 | transcription_start_site | - | 48989 | 48989 | -1490 | 13282 | AN2684 |
| 2892 | CONTIG47 | 50345 | 50614 | 1.01 | 1.44E-01 | transcription_start_site | + | 53171 | 53171 | -2691 | 13283 | AN2685 |
| 2892 | CONTIG47 | 50345 | 50614 | 1.01 | 1.44E-01 | transcription_start_site | + | 55081 | 55081 | -4601 | 13284 | AN2686 |
| 2892 | CONTIG47 | 50345 | 50614 | 1.01 | 1.44E-01 | transcription_start_site | + | 55232 | 55232 | -4752 | 13285 | AN2686 |
| 2892 | CONTIG47 | 50345 | 50614 | 1.01 | 1.44E-01 | transcription_start_site | + | 55379 | 55379 | -4899 | 13286 | AN2686 |
| 2498 | CONTIG47 | 70353 | 71152 | 1.2  | 4.42E-02 | transcription_start_site | - | 66447 | 66447 | -4305 | 13297 | AN2690 |
| 395  | CONTIG47 | 72078 | 72592 | 2.61 | 0.00E+00 | transcription_start_site | + | 72814 | 72814 | -479  | 13300 | AN2692 |
| 395  | CONTIG47 | 72078 | 72592 | 2.61 | 0.00E+00 | transcription_start_site | + | 73608 | 73608 | -1273 | 13301 | AN2692 |
| 2498 | CONTIG47 | 70353 | 71152 | 1.2  | 4.42E-02 | transcription_start_site | + | 72814 | 72814 | -2061 | 13300 | AN2692 |
| 2498 | CONTIG47 | 70353 | 71152 | 1.2  | 4.42E-02 | transcription_start_site | + | 73608 | 73608 | -2855 | 13301 | AN2692 |
| 2701 | CONTIG47 | 76593 | 76927 | 1.12 | 7.51E-02 | transcription_start_site | - | 76585 | 76585 | -175  | 13304 | AN2693 |
| 2701 | CONTIG47 | 76593 | 76927 | 1.12 | 7.51E-02 | transcription_start_site | - | 77151 | 77151 | 391   | 13303 | AN2693 |
| 2701 | CONTIG47 | 76593 | 76927 | 1.12 | 7.51E-02 | transcription_start_site | - | 77269 | 77269 | 509   | 13302 | AN2693 |
| 2701 | CONTIG47 | 76593 | 76927 | 1.12 | 7.51E-02 | transcription_start_site | + | 77786 | 77786 | -1026 | 13305 | AN2694 |
| 2701 | CONTIG47 | 76593 | 76927 | 1.12 | 7.51E-02 | transcription_start_site | + | 77883 | 77883 | -1123 | 13306 | AN2694 |
| 2701 | CONTIG47 | 76593 | 76927 | 1.12 | 7.51E-02 | transcription_start_site | + | 78252 | 78252 | -1492 | 13307 | AN2694 |
| 2701 | CONTIG47 | 76593 | 76927 | 1.12 | 7.51E-02 | transcription_start_site | + | 78613 | 78613 | -1853 | 13308 | AN2694 |
| 2701 | CONTIG47 | 76593 | 76927 | 1.12 | 7.51E-02 | transcription_start_site | + | 79326 | 79326 | -2566 | 13309 | AN2695 |
| 2701 | CONTIG47 | 76593 | 76927 | 1.12 | 7.51E-02 | transcription_start_site | + | 79522 | 79522 | -2762 | 13310 | AN2695 |
| 1973 | CONTIG47 | 85814 | 86308 | 1.38 | 3.08E-02 | transcription_start_site | - | 82686 | 82686 | -3375 | 13311 | AN2696 |
| 1973 | CONTIG47 | 85814 | 86308 | 1.38 | 3.08E-02 | transcription_start_site | - | 82523 | 82523 | -3538 | 13312 | AN2696 |
| 1973 | CONTIG47 | 85814 | 86308 | 1.38 | 3.08E-02 | transcription_start_site | - | 82283 | 82283 | -3778 | 13313 | AN2696 |
| 1973 | CONTIG47 | 85814 | 86308 | 1.38 | 3.08E-02 | transcription_start_site | - | 81991 | 81991 | -4070 | 13314 | AN2696 |

|               |        |        |      |          |                          |   |        |        |       |       |        |
|---------------|--------|--------|------|----------|--------------------------|---|--------|--------|-------|-------|--------|
| 1973 CONTIG47 | 85814  | 86308  | 1.38 | 3.08E-02 | transcription_start_site | - | 81515  | 81515  | -4546 | 13315 | AN2696 |
| 1973 CONTIG47 | 85814  | 86308  | 1.38 | 3.08E-02 | transcription_start_site | - | 81271  | 81271  | -4790 | 13316 | AN2696 |
| 2952 CONTIG47 | 85144  | 85703  | 0.97 | 1.50E-01 | transcription_start_site | - | 82686  | 82686  | -2737 | 13311 | AN2696 |
| 2952 CONTIG47 | 85144  | 85703  | 0.97 | 1.50E-01 | transcription_start_site | - | 82523  | 82523  | -2900 | 13312 | AN2696 |
| 2952 CONTIG47 | 85144  | 85703  | 0.97 | 1.50E-01 | transcription_start_site | - | 82283  | 82283  | -3140 | 13313 | AN2696 |
| 2952 CONTIG47 | 85144  | 85703  | 0.97 | 1.50E-01 | transcription_start_site | - | 81991  | 81991  | -3432 | 13314 | AN2696 |
| 2952 CONTIG47 | 85144  | 85703  | 0.97 | 1.50E-01 | transcription_start_site | - | 81515  | 81515  | -3908 | 13315 | AN2696 |
| 2952 CONTIG47 | 85144  | 85703  | 0.97 | 1.50E-01 | transcription_start_site | - | 81271  | 81271  | -4152 | 13316 | AN2696 |
| 1973 CONTIG47 | 85814  | 86308  | 1.38 | 3.08E-02 | transcription_start_site | - | 86538  | 86538  | 477   | 13317 | AN2697 |
| 1973 CONTIG47 | 85814  | 86308  | 1.38 | 3.08E-02 | transcription_start_site | - | 85186  | 85186  | -875  | 13318 | AN2697 |
| 2952 CONTIG47 | 85144  | 85703  | 0.97 | 1.50E-01 | transcription_start_site | - | 85186  | 85186  | -237  | 13318 | AN2697 |
| 2952 CONTIG47 | 85144  | 85703  | 0.97 | 1.50E-01 | transcription_start_site | - | 86538  | 86538  | 1114  | 13317 | AN2697 |
| 1973 CONTIG47 | 85814  | 86308  | 1.38 | 3.08E-02 | transcription_start_site | + | 89280  | 89280  | -3219 | 13320 | AN2699 |
| 2952 CONTIG47 | 85144  | 85703  | 0.97 | 1.50E-01 | transcription_start_site | + | 89280  | 89280  | -3856 | 13320 | AN2699 |
| 1377 CONTIG47 | 93919  | 94403  | 1.64 | 4.17E-03 | transcription_start_site | - | 92212  | 92212  | -1949 | 13321 | AN2700 |
| 2893 CONTIG47 | 104269 | 104608 | 1.01 | 1.44E-01 | transcription_start_site | + | 103831 | 103831 | 607   | 13327 | AN2702 |
| 2157 CONTIG47 | 105769 | 106028 | 1.31 | 4.36E-02 | transcription_start_site | - | 105840 | 105840 | -58   | 13328 | AN2703 |
| 2157 CONTIG47 | 105769 | 106028 | 1.31 | 4.36E-02 | transcription_start_site | + | 106683 | 106683 | -784  | 13329 | AN2704 |
| 2157 CONTIG47 | 105769 | 106028 | 1.31 | 4.36E-02 | transcription_start_site | + | 108660 | 108660 | -2761 | 13330 | AN2704 |
| 2893 CONTIG47 | 104269 | 104608 | 1.01 | 1.44E-01 | transcription_start_site | + | 106683 | 106683 | -2244 | 13329 | AN2704 |
| 2893 CONTIG47 | 104269 | 104608 | 1.01 | 1.44E-01 | transcription_start_site | + | 108660 | 108660 | -4221 | 13330 | AN2704 |
| 1171 CONTIG48 | 23703  | 23992  | 1.78 | 1.11E-02 | transcription_start_site | + | 24149  | 24149  | -301  | 13389 | AN2720 |
| 1171 CONTIG48 | 23703  | 23992  | 1.78 | 1.11E-02 | transcription_start_site | + | 24559  | 24559  | -711  | 13390 | AN2720 |
| 1171 CONTIG48 | 23703  | 23992  | 1.78 | 1.11E-02 | transcription_start_site | + | 24968  | 24968  | -1120 | 13391 | AN2720 |
| 1171 CONTIG48 | 23703  | 23992  | 1.78 | 1.11E-02 | transcription_start_site | + | 28945  | 28945  | -5097 | 13396 | AN2722 |
| 96 CONTIG48   | 65041  | 65310  | 3.23 | 0.00E+00 | transcription_start_site | - | 64232  | 64232  | -943  | 13426 | AN2730 |
| 96 CONTIG48   | 65041  | 65310  | 3.23 | 0.00E+00 | transcription_start_site | - | 63751  | 63751  | -1424 | 13427 | AN2730 |
| 2107 CONTIG48 | 73654  | 73939  | 1.33 | 6.84E-02 | transcription_start_site | - | 73350  | 73350  | -446  | 13428 | AN2731 |
| 2107 CONTIG48 | 73654  | 73939  | 1.33 | 6.84E-02 | transcription_start_site | - | 73251  | 73251  | -545  | 13429 | AN2731 |
| 2107 CONTIG48 | 73654  | 73939  | 1.33 | 6.84E-02 | transcription_start_site | - | 73119  | 73119  | -677  | 13430 | AN2731 |
| 2107 CONTIG48 | 73654  | 73939  | 1.33 | 6.84E-02 | transcription_start_site | - | 72232  | 72232  | -1564 | 13431 | AN2731 |
| 2511 CONTIG48 | 88959  | 89843  | 1.2  | 1.08E-01 | transcription_start_site | - | 85124  | 85124  | -4277 | 13444 | AN2736 |
| 2511 CONTIG48 | 88959  | 89843  | 1.2  | 1.08E-01 | transcription_start_site | - | 85010  | 85010  | -4391 | 13445 | AN2736 |
| 2511 CONTIG48 | 88959  | 89843  | 1.2  | 1.08E-01 | transcription_start_site | - | 87878  | 87878  | -1523 | 13448 | AN2737 |
| 2511 CONTIG48 | 88959  | 89843  | 1.2  | 1.08E-01 | transcription_start_site | - | 87225  | 87225  | -2176 | 13449 | AN2737 |
| 2511 CONTIG48 | 88959  | 89843  | 1.2  | 1.08E-01 | transcription_start_site | - | 85653  | 85653  | -3748 | 13450 | AN2737 |
| 2511 CONTIG48 | 88959  | 89843  | 1.2  | 1.08E-01 | transcription_start_site | + | 89179  | 89179  | 222   | 13452 | AN2738 |
| 2511 CONTIG48 | 88959  | 89843  | 1.2  | 1.08E-01 | transcription_start_site | + | 88746  | 88746  | 655   | 13451 | AN2738 |
| 649 CONTIG48  | 94204  | 94478  | 2.24 | 1.22E-03 | transcription_start_site | - | 93855  | 93855  | -486  | 13453 | AN2739 |
| 649 CONTIG48  | 94204  | 94478  | 2.24 | 1.22E-03 | transcription_start_site | - | 93028  | 93028  | -1313 | 13454 | AN2739 |
| 649 CONTIG48  | 94204  | 94478  | 2.24 | 1.22E-03 | transcription_start_site | - | 92806  | 92806  | -1535 | 13455 | AN2739 |
| 649 CONTIG48  | 94204  | 94478  | 2.24 | 1.22E-03 | transcription_start_site | - | 92265  | 92265  | -2076 | 13456 | AN2739 |
| 649 CONTIG48  | 94204  | 94478  | 2.24 | 1.22E-03 | transcription_start_site | - | 92047  | 92047  | -2294 | 13457 | AN2739 |
| 649 CONTIG48  | 94204  | 94478  | 2.24 | 1.22E-03 | transcription_start_site | - | 91839  | 91839  | -2502 | 13458 | AN2739 |
| 649 CONTIG48  | 94204  | 94478  | 2.24 | 1.22E-03 | transcription_start_site | - | 91342  | 91342  | -2999 | 13459 | AN2739 |
| 649 CONTIG48  | 94204  | 94478  | 2.24 | 1.22E-03 | transcription_start_site | - | 91016  | 91016  | -3325 | 13460 | AN2739 |
| 649 CONTIG48  | 94204  | 94478  | 2.24 | 1.22E-03 | transcription_start_site | - | 90870  | 90870  | -3471 | 13461 | AN2739 |
| 649 CONTIG48  | 94204  | 94478  | 2.24 | 1.22E-03 | transcription_start_site | - | 90694  | 90694  | -3647 | 13462 | AN2739 |
| 2511 CONTIG48 | 88959  | 89843  | 1.2  | 1.08E-01 | transcription_start_site | - | 90694  | 90694  | 1293  | 13462 | AN2739 |
| 529 CONTIG49  | 4277   | 5151   | 2.4  | 0.00E+00 | transcription_start_site | + | 6592   | 6592   | -1878 | 13463 | AN2740 |
| 529 CONTIG49  | 4277   | 5151   | 2.4  | 0.00E+00 | transcription_start_site | + | 6809   | 6809   | -2095 | 13464 | AN2740 |
| 529 CONTIG49  | 4277   | 5151   | 2.4  | 0.00E+00 | transcription_start_site | + | 7447   | 7447   | -2733 | 13465 | AN2740 |
| 529 CONTIG49  | 4277   | 5151   | 2.4  | 0.00E+00 | transcription_start_site | + | 7563   | 7563   | -2849 | 13466 | AN2740 |
| 815 CONTIG49  | 3016   | 3595   | 2.08 | 0.00E+00 | transcription_start_site | + | 6592   | 6592   | -3286 | 13463 | AN2740 |
| 815 CONTIG49  | 3016   | 3595   | 2.08 | 0.00E+00 | transcription_start_site | + | 6809   | 6809   | -3503 | 13464 | AN2740 |
| 815 CONTIG49  | 3016   | 3595   | 2.08 | 0.00E+00 | transcription_start_site | + | 7447   | 7447   | -4141 | 13465 | AN2740 |
| 815 CONTIG49  | 3016   | 3595   | 2.08 | 0.00E+00 | transcription_start_site | + | 7563   | 7563   | -4257 | 13466 | AN2740 |



|      |          |       |       |      |          |                          |   |       |       |       |       |        |
|------|----------|-------|-------|------|----------|--------------------------|---|-------|-------|-------|-------|--------|
| 1037 | CONTIG49 | 5329  | 6058  | 1.88 | 5.20E-03 | transcription_start_site | + | 6592  | 6592  | -898  | 13463 | AN2740 |
| 1037 | CONTIG49 | 5329  | 6058  | 1.88 | 5.20E-03 | transcription_start_site | + | 6809  | 6809  | -1115 | 13464 | AN2740 |
| 1037 | CONTIG49 | 5329  | 6058  | 1.88 | 5.20E-03 | transcription_start_site | + | 7447  | 7447  | -1753 | 13465 | AN2740 |
| 1037 | CONTIG49 | 5329  | 6058  | 1.88 | 5.20E-03 | transcription_start_site | + | 7563  | 7563  | -1869 | 13466 | AN2740 |
| 126  | CONTIG49 | 15087 | 15584 | 3.12 | 0.00E+00 | transcription_start_site | - | 11569 | 11569 | -3766 | 13467 | AN2741 |
| 126  | CONTIG49 | 15087 | 15584 | 3.12 | 0.00E+00 | transcription_start_site | - | 11349 | 11349 | -3986 | 13468 | AN2741 |
| 126  | CONTIG49 | 15087 | 15584 | 3.12 | 0.00E+00 | transcription_start_site | - | 11072 | 11072 | -4263 | 13469 | AN2741 |
| 2504 | CONTIG49 | 15832 | 16711 | 1.2  | 7.51E-02 | transcription_start_site | - | 11569 | 11569 | -4702 | 13467 | AN2741 |
| 2504 | CONTIG49 | 15832 | 16711 | 1.2  | 7.51E-02 | transcription_start_site | - | 11349 | 11349 | -4922 | 13468 | AN2741 |
| 2504 | CONTIG49 | 15832 | 16711 | 1.2  | 7.51E-02 | transcription_start_site | - | 11072 | 11072 | -5199 | 13469 | AN2741 |
| 126  | CONTIG49 | 15087 | 15584 | 3.12 | 0.00E+00 | transcription_start_site | - | 15045 | 15045 | -290  | 13470 | AN2742 |
| 126  | CONTIG49 | 15087 | 15584 | 3.12 | 0.00E+00 | transcription_start_site | - | 14824 | 14824 | -511  | 13471 | AN2742 |
| 126  | CONTIG49 | 15087 | 15584 | 3.12 | 0.00E+00 | transcription_start_site | - | 14717 | 14717 | -618  | 13472 | AN2742 |
| 126  | CONTIG49 | 15087 | 15584 | 3.12 | 0.00E+00 | transcription_start_site | - | 14632 | 14632 | -703  | 13473 | AN2742 |
| 2504 | CONTIG49 | 15832 | 16711 | 1.2  | 7.51E-02 | transcription_start_site | - | 15045 | 15045 | -1226 | 13470 | AN2742 |
| 2504 | CONTIG49 | 15832 | 16711 | 1.2  | 7.51E-02 | transcription_start_site | - | 14824 | 14824 | -1447 | 13471 | AN2742 |
| 2504 | CONTIG49 | 15832 | 16711 | 1.2  | 7.51E-02 | transcription_start_site | - | 14717 | 14717 | -1554 | 13472 | AN2742 |
| 2504 | CONTIG49 | 15832 | 16711 | 1.2  | 7.51E-02 | transcription_start_site | - | 14632 | 14632 | -1639 | 13473 | AN2742 |
| 126  | CONTIG49 | 15087 | 15584 | 3.12 | 0.00E+00 | transcription_start_site | + | 16482 | 16482 | -1146 | 13474 | AN2743 |
| 126  | CONTIG49 | 15087 | 15584 | 3.12 | 0.00E+00 | transcription_start_site | + | 16607 | 16607 | -1271 | 13475 | AN2743 |
| 126  | CONTIG49 | 15087 | 15584 | 3.12 | 0.00E+00 | transcription_start_site | + | 16888 | 16888 | -1552 | 13476 | AN2743 |
| 126  | CONTIG49 | 15087 | 15584 | 3.12 | 0.00E+00 | transcription_start_site | + | 19317 | 19317 | -3981 | 13477 | AN2743 |
| 2504 | CONTIG49 | 15832 | 16711 | 1.2  | 7.51E-02 | transcription_start_site | + | 16482 | 16482 | -210  | 13474 | AN2743 |
| 2504 | CONTIG49 | 15832 | 16711 | 1.2  | 7.51E-02 | transcription_start_site | + | 16607 | 16607 | -335  | 13475 | AN2743 |
| 2504 | CONTIG49 | 15832 | 16711 | 1.2  | 7.51E-02 | transcription_start_site | + | 16888 | 16888 | -616  | 13476 | AN2743 |
| 2504 | CONTIG49 | 15832 | 16711 | 1.2  | 7.51E-02 | transcription_start_site | + | 19317 | 19317 | -3045 | 13477 | AN2743 |
| 1543 | CONTIG49 | 35420 | 36286 | 1.56 | 1.05E-02 | transcription_start_site | - | 34475 | 34475 | -1378 | 13492 | AN2749 |
| 1543 | CONTIG49 | 35420 | 36286 | 1.56 | 1.05E-02 | transcription_start_site | - | 34376 | 34376 | -1477 | 13493 | AN2749 |
| 1543 | CONTIG49 | 35420 | 36286 | 1.56 | 1.05E-02 | transcription_start_site | - | 33999 | 33999 | -1854 | 13494 | AN2749 |
| 1543 | CONTIG49 | 35420 | 36286 | 1.56 | 1.05E-02 | transcription_start_site | - | 33786 | 33786 | -2067 | 13495 | AN2749 |
| 1543 | CONTIG49 | 35420 | 36286 | 1.56 | 1.05E-02 | transcription_start_site | + | 37461 | 37461 | -1608 | 13496 | AN2750 |
| 1543 | CONTIG49 | 35420 | 36286 | 1.56 | 1.05E-02 | transcription_start_site | + | 38107 | 38107 | -2254 | 13497 | AN2750 |
| 1543 | CONTIG49 | 35420 | 36286 | 1.56 | 1.05E-02 | transcription_start_site | + | 38937 | 38937 | -3084 | 13498 | AN2750 |
| 2908 | CONTIG49 | 42753 | 43192 | 1    | 1.93E-01 | transcription_start_site | - | 43568 | 43568 | 595   | 13500 | AN2751 |
| 2908 | CONTIG49 | 42753 | 43192 | 1    | 1.93E-01 | transcription_start_site | - | 43801 | 43801 | 828   | 13499 | AN2751 |
| 2908 | CONTIG49 | 42753 | 43192 | 1    | 1.93E-01 | transcription_start_site | - | 41322 | 41322 | -1650 | 13501 | AN2751 |
| 2908 | CONTIG49 | 42753 | 43192 | 1    | 1.93E-01 | transcription_start_site | + | 44684 | 44684 | -1711 | 13502 | AN2752 |
| 2908 | CONTIG49 | 42753 | 43192 | 1    | 1.93E-01 | transcription_start_site | + | 44789 | 44789 | -1816 | 13503 | AN2752 |
| 2908 | CONTIG49 | 42753 | 43192 | 1    | 1.93E-01 | transcription_start_site | + | 45628 | 45628 | -2655 | 13504 | AN2752 |
| 2908 | CONTIG49 | 42753 | 43192 | 1    | 1.93E-01 | transcription_start_site | + | 45972 | 45972 | -2999 | 13505 | AN2752 |
| 2253 | CONTIG49 | 50188 | 50677 | 1.28 | 6.84E-02 | transcription_start_site | - | 46851 | 46851 | -3581 | 13506 | AN2753 |
| 2253 | CONTIG49 | 50188 | 50677 | 1.28 | 6.84E-02 | transcription_start_site | - | 46598 | 46598 | -3834 | 13507 | AN2753 |
| 2253 | CONTIG49 | 50188 | 50677 | 1.28 | 6.84E-02 | transcription_start_site | - | 46422 | 46422 | -4010 | 13508 | AN2753 |
| 2253 | CONTIG49 | 50188 | 50677 | 1.28 | 6.84E-02 | transcription_start_site | + | 53697 | 53697 | -3264 | 13509 | AN2755 |
| 2253 | CONTIG49 | 50188 | 50677 | 1.28 | 6.84E-02 | transcription_start_site | + | 54042 | 54042 | -3609 | 13510 | AN2755 |
| 2780 | CONTIG49 | 70518 | 70927 | 1.08 | 1.44E-01 | transcription_start_site | + | 73399 | 73399 | -2676 | 13520 | AN2759 |
| 2780 | CONTIG49 | 70518 | 70927 | 1.08 | 1.44E-01 | transcription_start_site | + | 73758 | 73758 | -3035 | 13521 | AN2759 |
| 2780 | CONTIG49 | 70518 | 70927 | 1.08 | 1.44E-01 | transcription_start_site | + | 74092 | 74092 | -3369 | 13522 | AN2759 |
| 2130 | CONTIG49 | 80629 | 80981 | 1.32 | 5.88E-02 | transcription_start_site | - | 80292 | 80292 | -513  | 13525 | AN2761 |
| 2130 | CONTIG49 | 80629 | 80981 | 1.32 | 5.88E-02 | transcription_start_site | - | 80098 | 80098 | -707  | 13526 | AN2761 |
| 2130 | CONTIG49 | 80629 | 80981 | 1.32 | 5.88E-02 | transcription_start_site | - | 79953 | 79953 | -852  | 13527 | AN2761 |
| 2130 | CONTIG49 | 80629 | 80981 | 1.32 | 5.88E-02 | transcription_start_site | - | 79802 | 79802 | -1003 | 13528 | AN2761 |
| 2130 | CONTIG49 | 80629 | 80981 | 1.32 | 5.88E-02 | transcription_start_site | - | 79560 | 79560 | -1245 | 13529 | AN2761 |
| 2130 | CONTIG49 | 80629 | 80981 | 1.32 | 5.88E-02 | transcription_start_site | - | 81409 | 81409 | 604   | 13533 | AN2762 |
| 2130 | CONTIG49 | 80629 | 80981 | 1.32 | 5.88E-02 | transcription_start_site | - | 81569 | 81569 | 764   | 13532 | AN2762 |
| 1546 | CONTIG49 | 88369 | 88651 | 1.56 | 2.12E-02 | transcription_start_site | - | 85748 | 85748 | -2762 | 13534 | AN2763 |
| 1546 | CONTIG49 | 88369 | 88651 | 1.56 | 2.12E-02 | transcription_start_site | - | 84885 | 84885 | -3625 | 13535 | AN2763 |

|      |          |        |        |      |          |                          |   |        |        |       |       |        |
|------|----------|--------|--------|------|----------|--------------------------|---|--------|--------|-------|-------|--------|
| 1546 | CONTIG49 | 88369  | 88651  | 1.56 | 2.12E-02 | transcription_start_site | - | 84529  | 84529  | -3981 | 13536 | AN2763 |
| 1546 | CONTIG49 | 88369  | 88651  | 1.56 | 2.12E-02 | transcription_start_site | + | 87600  | 87600  | 910   | 13541 | AN2764 |
| 1546 | CONTIG49 | 88369  | 88651  | 1.56 | 2.12E-02 | transcription_start_site | + | 90263  | 90263  | -1753 | 13542 | AN2765 |
| 1546 | CONTIG49 | 88369  | 88651  | 1.56 | 2.12E-02 | transcription_start_site | + | 90428  | 90428  | -1918 | 13543 | AN2765 |
| 1546 | CONTIG49 | 88369  | 88651  | 1.56 | 2.12E-02 | transcription_start_site | + | 90613  | 90613  | -2103 | 13544 | AN2765 |
| 1546 | CONTIG49 | 88369  | 88651  | 1.56 | 2.12E-02 | transcription_start_site | + | 90760  | 90760  | -2250 | 13545 | AN2765 |
| 1546 | CONTIG49 | 88369  | 88651  | 1.56 | 2.12E-02 | transcription_start_site | + | 91030  | 91030  | -2520 | 13546 | AN2765 |
| 1546 | CONTIG49 | 88369  | 88651  | 1.56 | 2.12E-02 | transcription_start_site | + | 91141  | 91141  | -2631 | 13547 | AN2765 |
| 1546 | CONTIG49 | 88369  | 88651  | 1.56 | 2.12E-02 | transcription_start_site | + | 91366  | 91366  | -2856 | 13548 | AN2765 |
| 1546 | CONTIG49 | 88369  | 88651  | 1.56 | 2.12E-02 | transcription_start_site | + | 93342  | 93342  | -4832 | 13549 | AN2766 |
| 2369 | CONTIG49 | 92719  | 93283  | 1.24 | 8.01E-02 | transcription_start_site | + | 93342  | 93342  | -341  | 13549 | AN2766 |
| 2369 | CONTIG49 | 92719  | 93283  | 1.24 | 8.01E-02 | transcription_start_site | + | 93780  | 93780  | -779  | 13550 | AN2766 |
| 2369 | CONTIG49 | 92719  | 93283  | 1.24 | 8.01E-02 | transcription_start_site | + | 94533  | 94533  | -1532 | 13551 | AN2766 |
| 2369 | CONTIG49 | 92719  | 93283  | 1.24 | 8.01E-02 | transcription_start_site | + | 95545  | 95545  | -2544 | 13552 | AN2766 |
| 894  | CONTIG49 | 111471 | 111950 | 2    | 0.00E+00 | transcription_start_site | - | 110186 | 110186 | -1524 | 13558 | AN2770 |
| 894  | CONTIG49 | 111471 | 111950 | 2    | 0.00E+00 | transcription_start_site | - | 109685 | 109685 | -2025 | 13559 | AN2770 |
| 894  | CONTIG49 | 111471 | 111950 | 2    | 0.00E+00 | transcription_start_site | - | 108310 | 108310 | -3400 | 13560 | AN2770 |
| 984  | CONTIG49 | 109206 | 109495 | 1.92 | 4.61E-03 | transcription_start_site | - | 109685 | 109685 | 334   | 13559 | AN2770 |
| 984  | CONTIG49 | 109206 | 109495 | 1.92 | 4.61E-03 | transcription_start_site | - | 110186 | 110186 | 835   | 13558 | AN2770 |
| 984  | CONTIG49 | 109206 | 109495 | 1.92 | 4.61E-03 | transcription_start_site | - | 108310 | 108310 | -1040 | 13560 | AN2770 |
| 1311 | CONTIG49 | 109896 | 110525 | 1.68 | 1.30E-02 | transcription_start_site | - | 110186 | 110186 | -24   | 13558 | AN2770 |
| 1311 | CONTIG49 | 109896 | 110525 | 1.68 | 1.30E-02 | transcription_start_site | - | 109685 | 109685 | -525  | 13559 | AN2770 |
| 1311 | CONTIG49 | 109896 | 110525 | 1.68 | 1.30E-02 | transcription_start_site | - | 108310 | 108310 | -1900 | 13560 | AN2770 |
| 894  | CONTIG49 | 111471 | 111950 | 2    | 0.00E+00 | transcription_start_site | + | 111156 | 111156 | 554   | 13561 | AN2771 |
| 984  | CONTIG49 | 109206 | 109495 | 1.92 | 4.61E-03 | transcription_start_site | + | 111156 | 111156 | -1805 | 13561 | AN2771 |
| 1311 | CONTIG49 | 109896 | 110525 | 1.68 | 1.30E-02 | transcription_start_site | + | 111156 | 111156 | -945  | 13561 | AN2771 |
| 1909 | CONTIG49 | 126771 | 127555 | 1.4  | 2.47E-02 | transcription_start_site | - | 125568 | 125568 | -1595 | 13570 | AN2775 |
| 1909 | CONTIG49 | 126771 | 127555 | 1.4  | 2.47E-02 | transcription_start_site | - | 125471 | 125471 | -1692 | 13571 | AN2775 |
| 1909 | CONTIG49 | 126771 | 127555 | 1.4  | 2.47E-02 | transcription_start_site | - | 125219 | 125219 | -1944 | 13572 | AN2775 |
| 1909 | CONTIG49 | 126771 | 127555 | 1.4  | 2.47E-02 | transcription_start_site | - | 124759 | 124759 | -2404 | 13573 | AN2775 |
| 1909 | CONTIG49 | 126771 | 127555 | 1.4  | 2.47E-02 | transcription_start_site | - | 124481 | 124481 | -2682 | 13574 | AN2775 |
| 1909 | CONTIG49 | 126771 | 127555 | 1.4  | 2.47E-02 | transcription_start_site | - | 127285 | 127285 | 122   | 13576 | AN2776 |
| 1909 | CONTIG49 | 126771 | 127555 | 1.4  | 2.47E-02 | transcription_start_site | - | 127408 | 127408 | 245   | 13575 | AN2776 |
| 2909 | CONTIG49 | 133971 | 134233 | 1    | 1.93E-01 | transcription_start_site | - | 130225 | 130225 | -3877 | 13577 | AN2777 |
| 2909 | CONTIG49 | 133971 | 134233 | 1    | 1.93E-01 | transcription_start_site | - | 131699 | 131699 | -2403 | 13578 | AN2778 |
| 2909 | CONTIG49 | 133971 | 134233 | 1    | 1.93E-01 | transcription_start_site | - | 130969 | 130969 | -3133 | 13579 | AN2778 |
| 2909 | CONTIG49 | 133971 | 134233 | 1    | 1.93E-01 | transcription_start_site | - | 130919 | 130919 | -3183 | 13580 | AN2778 |
| 1909 | CONTIG49 | 126771 | 127555 | 1.4  | 2.47E-02 | transcription_start_site | + | 132155 | 132155 | -4992 | 13581 | AN2779 |
| 1909 | CONTIG49 | 126771 | 127555 | 1.4  | 2.47E-02 | transcription_start_site | + | 132425 | 132425 | -5262 | 13582 | AN2779 |
| 2909 | CONTIG49 | 133971 | 134233 | 1    | 1.93E-01 | transcription_start_site | + | 133573 | 133573 | 529   | 13587 | AN2779 |
| 2909 | CONTIG49 | 133971 | 134233 | 1    | 1.93E-01 | transcription_start_site | + | 133302 | 133302 | 800   | 13586 | AN2779 |
| 2909 | CONTIG49 | 133971 | 134233 | 1    | 1.93E-01 | transcription_start_site | + | 133072 | 133072 | 1030  | 13585 | AN2779 |
| 2909 | CONTIG49 | 133971 | 134233 | 1    | 1.93E-01 | transcription_start_site | + | 134234 | 134234 | -132  | 13588 | AN2780 |
| 771  | CONTIG49 | 169059 | 169333 | 2.12 | 1.54E-03 | transcription_start_site | - | 164758 | 164758 | -4438 | 13626 | AN2792 |
| 771  | CONTIG49 | 169059 | 169333 | 2.12 | 1.54E-03 | transcription_start_site | - | 164504 | 164504 | -4692 | 13627 | AN2792 |
| 771  | CONTIG49 | 169059 | 169333 | 2.12 | 1.54E-03 | transcription_start_site | - | 164191 | 164191 | -5005 | 13628 | AN2792 |
| 771  | CONTIG49 | 169059 | 169333 | 2.12 | 1.54E-03 | transcription_start_site | - | 166681 | 166681 | -2515 | 13631 | AN2793 |
| 771  | CONTIG49 | 169059 | 169333 | 2.12 | 1.54E-03 | transcription_start_site | - | 166149 | 166149 | -3047 | 13632 | AN2793 |
| 771  | CONTIG49 | 169059 | 169333 | 2.12 | 1.54E-03 | transcription_start_site | - | 165668 | 165668 | -3528 | 13633 | AN2793 |
| 771  | CONTIG49 | 169059 | 169333 | 2.12 | 1.54E-03 | transcription_start_site | + | 170235 | 170235 | -1039 | 13634 | AN2794 |
| 771  | CONTIG49 | 169059 | 169333 | 2.12 | 1.54E-03 | transcription_start_site | + | 170538 | 170538 | -1342 | 13635 | AN2794 |
| 771  | CONTIG49 | 169059 | 169333 | 2.12 | 1.54E-03 | transcription_start_site | + | 170825 | 170825 | -1629 | 13636 | AN2794 |
| 771  | CONTIG49 | 169059 | 169333 | 2.12 | 1.54E-03 | transcription_start_site | + | 172625 | 172625 | -3429 | 13637 | AN2795 |
| 771  | CONTIG49 | 169059 | 169333 | 2.12 | 1.54E-03 | transcription_start_site | + | 174312 | 174312 | -5116 | 13638 | AN2795 |
| 1129 | CONTIG50 | 6546   | 6895   | 1.81 | 2.64E-02 | transcription_start_site | + | 6935   | 6935   | -214  | 13692 | AN2809 |
| 1129 | CONTIG50 | 6546   | 6895   | 1.81 | 2.64E-02 | transcription_start_site | + | 7173   | 7173   | -452  | 13693 | AN2809 |
| 1959 | CONTIG50 | 8251   | 8545   | 1.39 | 1.44E-01 | transcription_start_site | - | 9062   | 9062   | 664   | 13696 | AN2810 |

|               |        |        |      |          |                          |   |        |        |       |       |        |
|---------------|--------|--------|------|----------|--------------------------|---|--------|--------|-------|-------|--------|
| 1207 CONTIG50 | 30838  | 31102  | 1.76 | 5.22E-02 | transcription_start_site | - | 27697  | 27697  | -3273 | 13706 | AN2814 |
| 1207 CONTIG50 | 30838  | 31102  | 1.76 | 5.22E-02 | transcription_start_site | - | 27532  | 27532  | -3438 | 13707 | AN2814 |
| 1207 CONTIG50 | 30838  | 31102  | 1.76 | 5.22E-02 | transcription_start_site | - | 27419  | 27419  | -3551 | 13708 | AN2814 |
| 1207 CONTIG50 | 30838  | 31102  | 1.76 | 5.22E-02 | transcription_start_site | - | 27318  | 27318  | -3652 | 13709 | AN2814 |
| 1207 CONTIG50 | 30838  | 31102  | 1.76 | 5.22E-02 | transcription_start_site | - | 27159  | 27159  | -3811 | 13710 | AN2814 |
| 1207 CONTIG50 | 30838  | 31102  | 1.76 | 5.22E-02 | transcription_start_site | - | 26864  | 26864  | -4106 | 13711 | AN2814 |
| 1207 CONTIG50 | 30838  | 31102  | 1.76 | 5.22E-02 | transcription_start_site | - | 26496  | 26496  | -4474 | 13712 | AN2814 |
| 1207 CONTIG50 | 30838  | 31102  | 1.76 | 5.22E-02 | transcription_start_site | - | 26176  | 26176  | -4794 | 13713 | AN2814 |
| 107 CONTIG50  | 34138  | 34487  | 3.2  | 2.67E-04 | transcription_start_site | + | 34837  | 34837  | -524  | 13715 | AN2815 |
| 1207 CONTIG50 | 30838  | 31102  | 1.76 | 5.22E-02 | transcription_start_site | + | 34837  | 34837  | -3867 | 13715 | AN2815 |
| 839 CONTIG51  | 12829  | 13103  | 2.06 | 1.30E-02 | transcription_start_site | + | 13540  | 13540  | -574  | 13730 | AN2822 |
| 1256 CONTIG51 | 13139  | 13853  | 1.72 | 2.45E-02 | transcription_start_site | + | 13540  | 13540  | -44   | 13730 | AN2822 |
| 1654 CONTIG51 | 23344  | 23611  | 1.52 | 8.01E-02 | transcription_start_site | - | 21165  | 21165  | -2312 | 13733 | AN2824 |
| 1654 CONTIG51 | 23344  | 23611  | 1.52 | 8.01E-02 | transcription_start_site | - | 18530  | 18530  | -4947 | 13734 | AN2824 |
| 1654 CONTIG51 | 23344  | 23611  | 1.52 | 8.01E-02 | transcription_start_site | - | 18398  | 18398  | -5079 | 13735 | AN2824 |
| 1654 CONTIG51 | 23344  | 23611  | 1.52 | 8.01E-02 | transcription_start_site | + | 28209  | 28209  | -4731 | 13738 | AN2827 |
| 1654 CONTIG51 | 23344  | 23611  | 1.52 | 8.01E-02 | transcription_start_site | + | 28302  | 28302  | -4824 | 13739 | AN2827 |
| 1655 CONTIG51 | 40745  | 42356  | 1.52 | 8.01E-02 | transcription_start_site | - | 37684  | 37684  | -3866 | 13741 | AN2828 |
| 1655 CONTIG51 | 40745  | 42356  | 1.52 | 8.01E-02 | transcription_start_site | - | 37093  | 37093  | -4457 | 13742 | AN2828 |
| 1655 CONTIG51 | 40745  | 42356  | 1.52 | 8.01E-02 | transcription_start_site | - | 36325  | 36325  | -5225 | 13743 | AN2828 |
| 1655 CONTIG51 | 40745  | 42356  | 1.52 | 8.01E-02 | transcription_start_site | - | 36112  | 36112  | -5438 | 13744 | AN2828 |
| 1655 CONTIG51 | 40745  | 42356  | 1.52 | 8.01E-02 | transcription_start_site | - | 40113  | 40113  | -1437 | 13746 | AN2829 |
| 1655 CONTIG51 | 40745  | 42356  | 1.52 | 8.01E-02 | transcription_start_site | - | 38656  | 38656  | -2894 | 13747 | AN2829 |
| 1655 CONTIG51 | 40745  | 42356  | 1.52 | 8.01E-02 | transcription_start_site | - | 38523  | 38523  | -3027 | 13748 | AN2829 |
| 1655 CONTIG51 | 40745  | 42356  | 1.52 | 8.01E-02 | transcription_start_site | - | 41841  | 41841  | 290   | 13749 | AN2830 |
| 2303 CONTIG51 | 78542  | 78808  | 1.27 | 1.66E-01 | transcription_start_site | - | 73921  | 73921  | -4754 | 13780 | AN2841 |
| 2303 CONTIG51 | 78542  | 78808  | 1.27 | 1.66E-01 | transcription_start_site | - | 76227  | 76227  | -2448 | 13782 | AN2842 |
| 2303 CONTIG51 | 78542  | 78808  | 1.27 | 1.66E-01 | transcription_start_site | - | 75523  | 75523  | -3152 | 13783 | AN2842 |
| 2303 CONTIG51 | 78542  | 78808  | 1.27 | 1.66E-01 | transcription_start_site | + | 78140  | 78140  | 535   | 13784 | AN2843 |
| 2303 CONTIG51 | 78542  | 78808  | 1.27 | 1.66E-01 | transcription_start_site | + | 79854  | 79854  | -1179 | 13785 | AN2844 |
| 2303 CONTIG51 | 78542  | 78808  | 1.27 | 1.66E-01 | transcription_start_site | + | 80267  | 80267  | -1592 | 13786 | AN2844 |
| 2303 CONTIG51 | 78542  | 78808  | 1.27 | 1.66E-01 | transcription_start_site | + | 80459  | 80459  | -1784 | 13787 | AN2844 |
| 247 CONTIG51  | 101271 | 101540 | 2.84 | 5.64E-04 | transcription_start_site | - | 100678 | 100678 | -727  | 13809 | AN2852 |
| 247 CONTIG51  | 101271 | 101540 | 2.84 | 5.64E-04 | transcription_start_site | - | 100338 | 100338 | -1067 | 13810 | AN2852 |
| 247 CONTIG51  | 101271 | 101540 | 2.84 | 5.64E-04 | transcription_start_site | - | 99482  | 99482  | -1923 | 13811 | AN2852 |
| 247 CONTIG51  | 101271 | 101540 | 2.84 | 5.64E-04 | transcription_start_site | - | 98823  | 98823  | -2582 | 13812 | AN2852 |
| 889 CONTIG51  | 101716 | 102220 | 2.01 | 1.57E-02 | transcription_start_site | - | 100678 | 100678 | -1290 | 13809 | AN2852 |
| 889 CONTIG51  | 101716 | 102220 | 2.01 | 1.57E-02 | transcription_start_site | - | 100338 | 100338 | -1630 | 13810 | AN2852 |
| 889 CONTIG51  | 101716 | 102220 | 2.01 | 1.57E-02 | transcription_start_site | - | 99482  | 99482  | -2486 | 13811 | AN2852 |
| 889 CONTIG51  | 101716 | 102220 | 2.01 | 1.57E-02 | transcription_start_site | - | 98823  | 98823  | -3145 | 13812 | AN2852 |
| 2304 CONTIG51 | 104861 | 105200 | 1.27 | 1.66E-01 | transcription_start_site | - | 100678 | 100678 | -4352 | 13809 | AN2852 |
| 2304 CONTIG51 | 104861 | 105200 | 1.27 | 1.66E-01 | transcription_start_site | - | 100338 | 100338 | -4692 | 13810 | AN2852 |
| 637 CONTIG51  | 107252 | 107676 | 2.26 | 6.61E-03 | transcription_start_site | - | 104014 | 104014 | -3450 | 13813 | AN2853 |
| 2017 CONTIG51 | 105762 | 106116 | 1.37 | 1.25E-01 | transcription_start_site | - | 104014 | 104014 | -1925 | 13813 | AN2853 |
| 2304 CONTIG51 | 104861 | 105200 | 1.27 | 1.66E-01 | transcription_start_site | - | 104014 | 104014 | -1016 | 13813 | AN2853 |
| 248 CONTIG51  | 110642 | 111051 | 2.84 | 5.64E-04 | transcription_start_site | - | 106882 | 106882 | -3964 | 13814 | AN2854 |
| 248 CONTIG51  | 110642 | 111051 | 2.84 | 5.64E-04 | transcription_start_site | - | 106630 | 106630 | -4216 | 13815 | AN2854 |
| 637 CONTIG51  | 107252 | 107676 | 2.26 | 6.61E-03 | transcription_start_site | - | 106882 | 106882 | -582  | 13814 | AN2854 |
| 637 CONTIG51  | 107252 | 107676 | 2.26 | 6.61E-03 | transcription_start_site | - | 106630 | 106630 | -834  | 13815 | AN2854 |
| 637 CONTIG51  | 107252 | 107676 | 2.26 | 6.61E-03 | transcription_start_site | - | 104629 | 104629 | -2835 | 13816 | AN2854 |
| 2017 CONTIG51 | 105762 | 106116 | 1.37 | 1.25E-01 | transcription_start_site | - | 106630 | 106630 | 691   | 13815 | AN2854 |
| 2017 CONTIG51 | 105762 | 106116 | 1.37 | 1.25E-01 | transcription_start_site | - | 106882 | 106882 | 943   | 13814 | AN2854 |
| 2017 CONTIG51 | 105762 | 106116 | 1.37 | 1.25E-01 | transcription_start_site | - | 104629 | 104629 | -1310 | 13816 | AN2854 |
| 2304 CONTIG51 | 104861 | 105200 | 1.27 | 1.66E-01 | transcription_start_site | - | 104629 | 104629 | -401  | 13816 | AN2854 |
| 248 CONTIG51  | 110642 | 111051 | 2.84 | 5.64E-04 | transcription_start_site | - | 110402 | 110402 | -444  | 13817 | AN2855 |
| 248 CONTIG51  | 110642 | 111051 | 2.84 | 5.64E-04 | transcription_start_site | - | 110035 | 110035 | -811  | 13818 | AN2855 |
| 248 CONTIG51  | 110642 | 111051 | 2.84 | 5.64E-04 | transcription_start_site | - | 109693 | 109693 | -1153 | 13819 | AN2855 |

|               |        |        |      |          |                          |   |        |        |       |       |        |
|---------------|--------|--------|------|----------|--------------------------|---|--------|--------|-------|-------|--------|
| 1434 CONTIG51 | 118805 | 119244 | 1.62 | 5.88E-02 | transcription_start_site | - | 114176 | 114176 | -4848 | 13820 | AN2856 |
| 248 CONTIG51  | 110642 | 111051 | 2.84 | 5.64E-04 | transcription_start_site | + | 115254 | 115254 | -4407 | 13824 | AN2857 |
| 1434 CONTIG51 | 118805 | 119244 | 1.62 | 5.88E-02 | transcription_start_site | - | 118951 | 118951 | -73   | 13827 | AN2858 |
| 1434 CONTIG51 | 118805 | 119244 | 1.62 | 5.88E-02 | transcription_start_site | - | 119201 | 119201 | 176   | 13826 | AN2858 |
| 1434 CONTIG51 | 118805 | 119244 | 1.62 | 5.88E-02 | transcription_start_site | - | 118190 | 118190 | -834  | 13828 | AN2858 |
| 1434 CONTIG51 | 118805 | 119244 | 1.62 | 5.88E-02 | transcription_start_site | - | 118046 | 118046 | -978  | 13829 | AN2858 |
| 1533 CONTIG51 | 122855 | 123129 | 1.57 | 6.84E-02 | transcription_start_site | - | 119201 | 119201 | -3791 | 13826 | AN2858 |
| 1533 CONTIG51 | 122855 | 123129 | 1.57 | 6.84E-02 | transcription_start_site | - | 118951 | 118951 | -4041 | 13827 | AN2858 |
| 1533 CONTIG51 | 122855 | 123129 | 1.57 | 6.84E-02 | transcription_start_site | - | 118190 | 118190 | -4802 | 13828 | AN2858 |
| 1533 CONTIG51 | 122855 | 123129 | 1.57 | 6.84E-02 | transcription_start_site | - | 118046 | 118046 | -4946 | 13829 | AN2858 |
| 1434 CONTIG51 | 118805 | 119244 | 1.62 | 5.88E-02 | transcription_start_site | + | 119746 | 119746 | -721  | 13830 | AN2859 |
| 1434 CONTIG51 | 118805 | 119244 | 1.62 | 5.88E-02 | transcription_start_site | + | 121446 | 121446 | -2421 | 13831 | AN2860 |
| 1434 CONTIG51 | 118805 | 119244 | 1.62 | 5.88E-02 | transcription_start_site | + | 121576 | 121576 | -2551 | 13832 | AN2860 |
| 1434 CONTIG51 | 118805 | 119244 | 1.62 | 5.88E-02 | transcription_start_site | + | 121656 | 121656 | -2631 | 13833 | AN2860 |
| 1434 CONTIG51 | 118805 | 119244 | 1.62 | 5.88E-02 | transcription_start_site | + | 121769 | 121769 | -2744 | 13834 | AN2860 |
| 1434 CONTIG51 | 118805 | 119244 | 1.62 | 5.88E-02 | transcription_start_site | + | 121858 | 121858 | -2833 | 13835 | AN2860 |
| 1533 CONTIG51 | 122855 | 123129 | 1.57 | 6.84E-02 | transcription_start_site | + | 121858 | 121858 | 1134  | 13835 | AN2860 |
| 1434 CONTIG51 | 118805 | 119244 | 1.62 | 5.88E-02 | transcription_start_site | + | 123619 | 123619 | -4594 | 13836 | AN2861 |
| 1533 CONTIG51 | 122855 | 123129 | 1.57 | 6.84E-02 | transcription_start_site | + | 123619 | 123619 | -627  | 13836 | AN2861 |
| 1533 CONTIG51 | 122855 | 123129 | 1.57 | 6.84E-02 | transcription_start_site | + | 124667 | 124667 | -1675 | 13837 | AN2861 |
| 202 CONTIG51  | 127970 | 128304 | 2.94 | 2.16E-04 | transcription_start_site | + | 127237 | 127237 | 900   | 13843 | AN2862 |
| 1533 CONTIG51 | 122855 | 123129 | 1.57 | 6.84E-02 | transcription_start_site | + | 126199 | 126199 | -3207 | 13838 | AN2862 |
| 1533 CONTIG51 | 122855 | 123129 | 1.57 | 6.84E-02 | transcription_start_site | + | 126292 | 126292 | -3300 | 13839 | AN2862 |
| 1533 CONTIG51 | 122855 | 123129 | 1.57 | 6.84E-02 | transcription_start_site | + | 126473 | 126473 | -3481 | 13840 | AN2862 |
| 1533 CONTIG51 | 122855 | 123129 | 1.57 | 6.84E-02 | transcription_start_site | + | 126570 | 126570 | -3578 | 13841 | AN2862 |
| 1533 CONTIG51 | 122855 | 123129 | 1.57 | 6.84E-02 | transcription_start_site | + | 126706 | 126706 | -3714 | 13842 | AN2862 |
| 1533 CONTIG51 | 122855 | 123129 | 1.57 | 6.84E-02 | transcription_start_site | + | 127237 | 127237 | -4245 | 13843 | AN2862 |
| 202 CONTIG51  | 127970 | 128304 | 2.94 | 2.16E-04 | transcription_start_site | + | 128876 | 128876 | -739  | 13844 | AN2863 |
| 202 CONTIG51  | 127970 | 128304 | 2.94 | 2.16E-04 | transcription_start_site | + | 131400 | 131400 | -3263 | 13845 | AN2864 |
| 202 CONTIG51  | 127970 | 128304 | 2.94 | 2.16E-04 | transcription_start_site | + | 131597 | 131597 | -3460 | 13846 | AN2864 |
| 202 CONTIG51  | 127970 | 128304 | 2.94 | 2.16E-04 | transcription_start_site | + | 132016 | 132016 | -3879 | 13847 | AN2864 |
| 2305 CONTIG51 | 130295 | 130779 | 1.27 | 1.66E-01 | transcription_start_site | + | 131400 | 131400 | -863  | 13845 | AN2864 |
| 2305 CONTIG51 | 130295 | 130779 | 1.27 | 1.66E-01 | transcription_start_site | + | 131597 | 131597 | -1060 | 13846 | AN2864 |
| 2305 CONTIG51 | 130295 | 130779 | 1.27 | 1.66E-01 | transcription_start_site | + | 132016 | 132016 | -1479 | 13847 | AN2864 |
| 2305 CONTIG51 | 130295 | 130779 | 1.27 | 1.66E-01 | transcription_start_site | + | 134491 | 134491 | -3954 | 13848 | AN2865 |
| 1520 CONTIG51 | 156237 | 157936 | 1.57 | 3.41E-02 | transcription_start_site | - | 155006 | 155006 | -2080 | 13861 | AN2870 |
| 1520 CONTIG51 | 156237 | 157936 | 1.57 | 3.41E-02 | transcription_start_site | - | 154217 | 154217 | -2869 | 13862 | AN2870 |
| 2018 CONTIG51 | 159004 | 159375 | 1.37 | 1.25E-01 | transcription_start_site | - | 155006 | 155006 | -4183 | 13861 | AN2870 |
| 2018 CONTIG51 | 159004 | 159375 | 1.37 | 1.25E-01 | transcription_start_site | - | 154217 | 154217 | -4972 | 13862 | AN2870 |
| 1520 CONTIG51 | 156237 | 157936 | 1.57 | 3.41E-02 | transcription_start_site | - | 158287 | 158287 | 1200  | 13864 | AN2871 |
| 1520 CONTIG51 | 156237 | 157936 | 1.57 | 3.41E-02 | transcription_start_site | - | 158651 | 158651 | 1564  | 13863 | AN2871 |
| 2018 CONTIG51 | 159004 | 159375 | 1.37 | 1.25E-01 | transcription_start_site | - | 158651 | 158651 | -538  | 13863 | AN2871 |
| 2018 CONTIG51 | 159004 | 159375 | 1.37 | 1.25E-01 | transcription_start_site | - | 158287 | 158287 | -902  | 13864 | AN2871 |
| 1520 CONTIG51 | 156237 | 157936 | 1.57 | 3.41E-02 | transcription_start_site | + | 159635 | 159635 | -2548 | 13865 | AN2872 |
| 1520 CONTIG51 | 156237 | 157936 | 1.57 | 3.41E-02 | transcription_start_site | + | 161089 | 161089 | -4002 | 13866 | AN2872 |
| 1520 CONTIG51 | 156237 | 157936 | 1.57 | 3.41E-02 | transcription_start_site | + | 161636 | 161636 | -4549 | 13867 | AN2872 |
| 2018 CONTIG51 | 159004 | 159375 | 1.37 | 1.25E-01 | transcription_start_site | + | 159635 | 159635 | -445  | 13865 | AN2872 |
| 2018 CONTIG51 | 159004 | 159375 | 1.37 | 1.25E-01 | transcription_start_site | + | 161089 | 161089 | -1899 | 13866 | AN2872 |
| 2018 CONTIG51 | 159004 | 159375 | 1.37 | 1.25E-01 | transcription_start_site | + | 161636 | 161636 | -2446 | 13867 | AN2872 |
| 1520 CONTIG51 | 156237 | 157936 | 1.57 | 3.41E-02 | transcription_start_site | + | 162550 | 162550 | -5463 | 13868 | AN2873 |
| 1520 CONTIG51 | 156237 | 157936 | 1.57 | 3.41E-02 | transcription_start_site | + | 162662 | 162662 | -5575 | 13869 | AN2873 |
| 1520 CONTIG51 | 156237 | 157936 | 1.57 | 3.41E-02 | transcription_start_site | + | 162857 | 162857 | -5770 | 13870 | AN2873 |
| 1520 CONTIG51 | 156237 | 157936 | 1.57 | 3.41E-02 | transcription_start_site | + | 162932 | 162932 | -5845 | 13871 | AN2873 |
| 2018 CONTIG51 | 159004 | 159375 | 1.37 | 1.25E-01 | transcription_start_site | + | 162550 | 162550 | -3360 | 13868 | AN2873 |
| 2018 CONTIG51 | 159004 | 159375 | 1.37 | 1.25E-01 | transcription_start_site | + | 162662 | 162662 | -3472 | 13869 | AN2873 |
| 2018 CONTIG51 | 159004 | 159375 | 1.37 | 1.25E-01 | transcription_start_site | + | 162857 | 162857 | -3667 | 13870 | AN2873 |
| 2018 CONTIG51 | 159004 | 159375 | 1.37 | 1.25E-01 | transcription_start_site | + | 162932 | 162932 | -3742 | 13871 | AN2873 |

|               |        |        |      |          |                          |   |        |        |       |       |        |
|---------------|--------|--------|------|----------|--------------------------|---|--------|--------|-------|-------|--------|
| 2018 CONTIG51 | 159004 | 159375 | 1.37 | 1.25E-01 | transcription_start_site | + | 163228 | 163228 | -4038 | 13872 | AN2873 |
| 2018 CONTIG51 | 159004 | 159375 | 1.37 | 1.25E-01 | transcription_start_site | + | 163306 | 163306 | -4116 | 13873 | AN2873 |
| 2018 CONTIG51 | 159004 | 159375 | 1.37 | 1.25E-01 | transcription_start_site | + | 163531 | 163531 | -4341 | 13874 | AN2873 |
| 2018 CONTIG51 | 159004 | 159375 | 1.37 | 1.25E-01 | transcription_start_site | + | 163675 | 163675 | -4485 | 13875 | AN2873 |
| 2018 CONTIG51 | 159004 | 159375 | 1.37 | 1.25E-01 | transcription_start_site | + | 163824 | 163824 | -4634 | 13876 | AN2873 |
| 2018 CONTIG51 | 159004 | 159375 | 1.37 | 1.25E-01 | transcription_start_site | + | 163946 | 163946 | -4756 | 13877 | AN2873 |
| 791 CONTIG51  | 175507 | 175784 | 2.11 | 1.11E-02 | transcription_start_site | + | 176018 | 176018 | -372  | 13885 | AN2875 |
| 791 CONTIG51  | 175507 | 175784 | 2.11 | 1.11E-02 | transcription_start_site | + | 176182 | 176182 | -536  | 13886 | AN2875 |
| 791 CONTIG51  | 175507 | 175784 | 2.11 | 1.11E-02 | transcription_start_site | + | 176341 | 176341 | -695  | 13887 | AN2875 |
| 791 CONTIG51  | 175507 | 175784 | 2.11 | 1.11E-02 | transcription_start_site | + | 176696 | 176696 | -1050 | 13888 | AN2875 |
| 791 CONTIG51  | 175507 | 175784 | 2.11 | 1.11E-02 | transcription_start_site | + | 177923 | 177923 | -2277 | 13889 | AN2876 |
| 791 CONTIG51  | 175507 | 175784 | 2.11 | 1.11E-02 | transcription_start_site | + | 178139 | 178139 | -2493 | 13890 | AN2876 |
| 791 CONTIG51  | 175507 | 175784 | 2.11 | 1.11E-02 | transcription_start_site | + | 178224 | 178224 | -2578 | 13891 | AN2876 |
| 791 CONTIG51  | 175507 | 175784 | 2.11 | 1.11E-02 | transcription_start_site | + | 178758 | 178758 | -3112 | 13892 | AN2876 |
| 791 CONTIG51  | 175507 | 175784 | 2.11 | 1.11E-02 | transcription_start_site | + | 178928 | 178928 | -3282 | 13893 | AN2876 |
| 791 CONTIG51  | 175507 | 175784 | 2.11 | 1.11E-02 | transcription_start_site | + | 179187 | 179187 | -3541 | 13894 | AN2876 |
| 791 CONTIG51  | 175507 | 175784 | 2.11 | 1.11E-02 | transcription_start_site | + | 179473 | 179473 | -3827 | 13895 | AN2876 |
| 791 CONTIG51  | 175507 | 175784 | 2.11 | 1.11E-02 | transcription_start_site | + | 179590 | 179590 | -3944 | 13896 | AN2876 |
| 791 CONTIG51  | 175507 | 175784 | 2.11 | 1.11E-02 | transcription_start_site | + | 179748 | 179748 | -4102 | 13897 | AN2876 |
| 608 CONTIG51  | 187361 | 187630 | 2.3  | 5.20E-03 | transcription_start_site | + | 186641 | 186641 | 854   | 13908 | AN2879 |
| 608 CONTIG51  | 187361 | 187630 | 2.3  | 5.20E-03 | transcription_start_site | + | 186501 | 186501 | 994   | 13907 | AN2879 |
| 608 CONTIG51  | 187361 | 187630 | 2.3  | 5.20E-03 | transcription_start_site | + | 188166 | 188166 | -670  | 13909 | AN2880 |
| 608 CONTIG51  | 187361 | 187630 | 2.3  | 5.20E-03 | transcription_start_site | + | 188301 | 188301 | -805  | 13910 | AN2880 |
| 608 CONTIG51  | 187361 | 187630 | 2.3  | 5.20E-03 | transcription_start_site | + | 188890 | 188890 | -1394 | 13911 | AN2880 |
| 608 CONTIG51  | 187361 | 187630 | 2.3  | 5.20E-03 | transcription_start_site | + | 191260 | 191260 | -3764 | 13912 | AN2880 |
| 608 CONTIG51  | 187361 | 187630 | 2.3  | 5.20E-03 | transcription_start_site | + | 192528 | 192528 | -5032 | 13913 | AN2881 |
| 2306 CONTIG51 | 194936 | 195210 | 1.27 | 1.66E-01 | transcription_start_site | - | 195138 | 195138 | 65    | 13917 | AN2882 |
| 2306 CONTIG51 | 194936 | 195210 | 1.27 | 1.66E-01 | transcription_start_site | - | 195277 | 195277 | 204   | 13916 | AN2882 |
| 2306 CONTIG51 | 194936 | 195210 | 1.27 | 1.66E-01 | transcription_start_site | + | 195540 | 195540 | -467  | 13918 | AN2883 |
| 1777 CONTIG51 | 202962 | 203301 | 1.47 | 7.51E-02 | transcription_start_site | - | 198959 | 198959 | -4172 | 13919 | AN2884 |
| 1777 CONTIG51 | 202962 | 203301 | 1.47 | 7.51E-02 | transcription_start_site | - | 198487 | 198487 | -4644 | 13920 | AN2884 |
| 1777 CONTIG51 | 202962 | 203301 | 1.47 | 7.51E-02 | transcription_start_site | - | 198029 | 198029 | -5102 | 13921 | AN2884 |
| 1883 CONTIG51 | 201617 | 202341 | 1.42 | 9.26E-02 | transcription_start_site | - | 198959 | 198959 | -3020 | 13919 | AN2884 |
| 1883 CONTIG51 | 201617 | 202341 | 1.42 | 9.26E-02 | transcription_start_site | - | 198487 | 198487 | -3492 | 13920 | AN2884 |
| 1883 CONTIG51 | 201617 | 202341 | 1.42 | 9.26E-02 | transcription_start_site | - | 198029 | 198029 | -3950 | 13921 | AN2884 |
| 1883 CONTIG51 | 201617 | 202341 | 1.42 | 9.26E-02 | transcription_start_site | - | 197901 | 197901 | -4078 | 13922 | AN2884 |
| 1883 CONTIG51 | 201617 | 202341 | 1.42 | 9.26E-02 | transcription_start_site | - | 197638 | 197638 | -4341 | 13923 | AN2884 |
| 1883 CONTIG51 | 201617 | 202341 | 1.42 | 9.26E-02 | transcription_start_site | - | 197436 | 197436 | -4543 | 13924 | AN2884 |
| 1883 CONTIG51 | 201617 | 202341 | 1.42 | 9.26E-02 | transcription_start_site | - | 197083 | 197083 | -4896 | 13925 | AN2884 |
| 1777 CONTIG51 | 202962 | 203301 | 1.47 | 7.51E-02 | transcription_start_site | - | 201379 | 201379 | -1752 | 13926 | AN2885 |
| 1777 CONTIG51 | 202962 | 203301 | 1.47 | 7.51E-02 | transcription_start_site | - | 201260 | 201260 | -1871 | 13927 | AN2885 |
| 1777 CONTIG51 | 202962 | 203301 | 1.47 | 7.51E-02 | transcription_start_site | - | 201111 | 201111 | -2020 | 13928 | AN2885 |
| 1777 CONTIG51 | 202962 | 203301 | 1.47 | 7.51E-02 | transcription_start_site | - | 200926 | 200926 | -2205 | 13929 | AN2885 |
| 1883 CONTIG51 | 201617 | 202341 | 1.42 | 9.26E-02 | transcription_start_site | - | 201379 | 201379 | -600  | 13926 | AN2885 |
| 1883 CONTIG51 | 201617 | 202341 | 1.42 | 9.26E-02 | transcription_start_site | - | 201260 | 201260 | -719  | 13927 | AN2885 |
| 1883 CONTIG51 | 201617 | 202341 | 1.42 | 9.26E-02 | transcription_start_site | - | 201111 | 201111 | -868  | 13928 | AN2885 |
| 1883 CONTIG51 | 201617 | 202341 | 1.42 | 9.26E-02 | transcription_start_site | - | 200926 | 200926 | -1053 | 13929 | AN2885 |
| 1777 CONTIG51 | 202962 | 203301 | 1.47 | 7.51E-02 | transcription_start_site | + | 205287 | 205287 | -2155 | 13933 | AN2887 |
| 1777 CONTIG51 | 202962 | 203301 | 1.47 | 7.51E-02 | transcription_start_site | + | 205374 | 205374 | -2242 | 13934 | AN2887 |
| 1883 CONTIG51 | 201617 | 202341 | 1.42 | 9.26E-02 | transcription_start_site | + | 205287 | 205287 | -3308 | 13933 | AN2887 |
| 1883 CONTIG51 | 201617 | 202341 | 1.42 | 9.26E-02 | transcription_start_site | + | 205374 | 205374 | -3395 | 13934 | AN2887 |
| 687 CONTIG51  | 215632 | 215901 | 2.21 | 7.85E-03 | transcription_start_site | - | 211143 | 211143 | -4623 | 13936 | AN2888 |
| 687 CONTIG51  | 215632 | 215901 | 2.21 | 7.85E-03 | transcription_start_site | - | 216062 | 216062 | 295   | 13939 | AN2890 |
| 687 CONTIG51  | 215632 | 215901 | 2.21 | 7.85E-03 | transcription_start_site | - | 216607 | 216607 | 840   | 13938 | AN2890 |
| 1435 CONTIG51 | 222676 | 223195 | 1.62 | 5.88E-02 | transcription_start_site | - | 218304 | 218304 | -4631 | 13940 | AN2891 |
| 1435 CONTIG51 | 222676 | 223195 | 1.62 | 5.88E-02 | transcription_start_site | - | 218026 | 218026 | -4909 | 13941 | AN2891 |
| 1435 CONTIG51 | 222676 | 223195 | 1.62 | 5.88E-02 | transcription_start_site | - | 220755 | 220755 | -2180 | 13943 | AN2892 |

|      |          |        |        |      |          |                          |   |        |        |       |       |        |
|------|----------|--------|--------|------|----------|--------------------------|---|--------|--------|-------|-------|--------|
| 1435 | CONTIG51 | 222676 | 223195 | 1.62 | 5.88E-02 | transcription_start_site | - | 220550 | 220550 | -2385 | 13944 | AN2892 |
| 1435 | CONTIG51 | 222676 | 223195 | 1.62 | 5.88E-02 | transcription_start_site | - | 220122 | 220122 | -2813 | 13945 | AN2892 |
| 1435 | CONTIG51 | 222676 | 223195 | 1.62 | 5.88E-02 | transcription_start_site | - | 219885 | 219885 | -3050 | 13946 | AN2892 |
| 1435 | CONTIG51 | 222676 | 223195 | 1.62 | 5.88E-02 | transcription_start_site | - | 219342 | 219342 | -3593 | 13947 | AN2892 |
| 1435 | CONTIG51 | 222676 | 223195 | 1.62 | 5.88E-02 | transcription_start_site | + | 222661 | 222661 | 274   | 13948 | AN2893 |
| 1435 | CONTIG51 | 222676 | 223195 | 1.62 | 5.88E-02 | transcription_start_site | - | 224049 | 224049 | 1113  | 13950 | AN2894 |
| 1124 | CONTIG51 | 230643 | 230995 | 1.81 | 1.81E-02 | transcription_start_site | - | 229970 | 229970 | -849  | 13951 | AN2895 |
| 1124 | CONTIG51 | 230643 | 230995 | 1.81 | 1.81E-02 | transcription_start_site | - | 229508 | 229508 | -1311 | 13952 | AN2895 |
| 1124 | CONTIG51 | 230643 | 230995 | 1.81 | 1.81E-02 | transcription_start_site | - | 228491 | 228491 | -2328 | 13953 | AN2895 |
| 952  | CONTIG51 | 240317 | 240731 | 1.96 | 1.84E-02 | transcription_start_site | - | 237723 | 237723 | -2801 | 13956 | AN2897 |
| 952  | CONTIG51 | 240317 | 240731 | 1.96 | 1.84E-02 | transcription_start_site | - | 237499 | 237499 | -3025 | 13957 | AN2897 |
| 952  | CONTIG51 | 240317 | 240731 | 1.96 | 1.84E-02 | transcription_start_site | + | 241347 | 241347 | -823  | 13960 | AN2898 |
| 952  | CONTIG51 | 240317 | 240731 | 1.96 | 1.84E-02 | transcription_start_site | + | 245386 | 245386 | -4862 | 13964 | AN2900 |
| 2019 | CONTIG51 | 256214 | 256493 | 1.37 | 1.25E-01 | transcription_start_site | - | 253838 | 253838 | -2515 | 13971 | AN2902 |
| 2019 | CONTIG51 | 256214 | 256493 | 1.37 | 1.25E-01 | transcription_start_site | - | 253539 | 253539 | -2814 | 13972 | AN2902 |
| 2019 | CONTIG51 | 256214 | 256493 | 1.37 | 1.25E-01 | transcription_start_site | - | 253403 | 253403 | -2950 | 13973 | AN2902 |
| 2424 | CONTIG51 | 254339 | 254617 | 1.23 | 1.93E-01 | transcription_start_site | - | 253838 | 253838 | -640  | 13971 | AN2902 |
| 2424 | CONTIG51 | 254339 | 254617 | 1.23 | 1.93E-01 | transcription_start_site | - | 253539 | 253539 | -939  | 13972 | AN2902 |
| 2424 | CONTIG51 | 254339 | 254617 | 1.23 | 1.93E-01 | transcription_start_site | - | 253403 | 253403 | -1075 | 13973 | AN2902 |
| 2019 | CONTIG51 | 256214 | 256493 | 1.37 | 1.25E-01 | transcription_start_site | - | 256203 | 256203 | -150  | 13974 | AN2903 |
| 2019 | CONTIG51 | 256214 | 256493 | 1.37 | 1.25E-01 | transcription_start_site | - | 256038 | 256038 | -315  | 13975 | AN2903 |
| 2019 | CONTIG51 | 256214 | 256493 | 1.37 | 1.25E-01 | transcription_start_site | - | 255848 | 255848 | -505  | 13976 | AN2903 |
| 2019 | CONTIG51 | 256214 | 256493 | 1.37 | 1.25E-01 | transcription_start_site | - | 255134 | 255134 | -1219 | 13977 | AN2903 |
| 2424 | CONTIG51 | 254339 | 254617 | 1.23 | 1.93E-01 | transcription_start_site | - | 255134 | 255134 | 656   | 13977 | AN2903 |
| 2019 | CONTIG51 | 256214 | 256493 | 1.37 | 1.25E-01 | transcription_start_site | - | 257163 | 257163 | 809   | 13983 | AN2904 |
| 2019 | CONTIG51 | 256214 | 256493 | 1.37 | 1.25E-01 | transcription_start_site | + | 261418 | 261418 | -5064 | 13984 | AN2905 |
| 179  | CONTIG51 | 275571 | 275843 | 2.99 | 2.39E-04 | transcription_start_site | - | 273162 | 273162 | -2545 | 13995 | AN2909 |
| 179  | CONTIG51 | 275571 | 275843 | 2.99 | 2.39E-04 | transcription_start_site | - | 272727 | 272727 | -2980 | 13996 | AN2909 |
| 179  | CONTIG51 | 275571 | 275843 | 2.99 | 2.39E-04 | transcription_start_site | - | 272083 | 272083 | -3624 | 13997 | AN2909 |
| 790  | CONTIG51 | 276770 | 277259 | 2.11 | 4.81E-03 | transcription_start_site | - | 273162 | 273162 | -3852 | 13995 | AN2909 |
| 790  | CONTIG51 | 276770 | 277259 | 2.11 | 4.81E-03 | transcription_start_site | - | 272727 | 272727 | -4287 | 13996 | AN2909 |
| 790  | CONTIG51 | 276770 | 277259 | 2.11 | 4.81E-03 | transcription_start_site | - | 272083 | 272083 | -4931 | 13997 | AN2909 |
| 1429 | CONTIG51 | 273986 | 274572 | 1.62 | 3.99E-02 | transcription_start_site | - | 273162 | 273162 | -1117 | 13995 | AN2909 |
| 1429 | CONTIG51 | 273986 | 274572 | 1.62 | 3.99E-02 | transcription_start_site | - | 272727 | 272727 | -1552 | 13996 | AN2909 |
| 1429 | CONTIG51 | 273986 | 274572 | 1.62 | 3.99E-02 | transcription_start_site | - | 272083 | 272083 | -2196 | 13997 | AN2909 |
| 179  | CONTIG51 | 275571 | 275843 | 2.99 | 2.39E-04 | transcription_start_site | + | 274832 | 274832 | 875   | 13999 | AN2910 |
| 1429 | CONTIG51 | 273986 | 274572 | 1.62 | 3.99E-02 | transcription_start_site | + | 273994 | 273994 | 285   | 13998 | AN2910 |
| 1429 | CONTIG51 | 273986 | 274572 | 1.62 | 3.99E-02 | transcription_start_site | + | 274832 | 274832 | -553  | 13999 | AN2910 |
| 179  | CONTIG51 | 275571 | 275843 | 2.99 | 2.39E-04 | transcription_start_site | + | 276855 | 276855 | -1148 | 14000 | AN2911 |
| 179  | CONTIG51 | 275571 | 275843 | 2.99 | 2.39E-04 | transcription_start_site | + | 277205 | 277205 | -1498 | 14001 | AN2911 |
| 179  | CONTIG51 | 275571 | 275843 | 2.99 | 2.39E-04 | transcription_start_site | + | 278390 | 278390 | -2683 | 14002 | AN2911 |
| 790  | CONTIG51 | 276770 | 277259 | 2.11 | 4.81E-03 | transcription_start_site | + | 276855 | 276855 | 159   | 14000 | AN2911 |
| 790  | CONTIG51 | 276770 | 277259 | 2.11 | 4.81E-03 | transcription_start_site | + | 277205 | 277205 | -190  | 14001 | AN2911 |
| 790  | CONTIG51 | 276770 | 277259 | 2.11 | 4.81E-03 | transcription_start_site | + | 278390 | 278390 | -1375 | 14002 | AN2911 |
| 1429 | CONTIG51 | 273986 | 274572 | 1.62 | 3.99E-02 | transcription_start_site | + | 276855 | 276855 | -2576 | 14000 | AN2911 |
| 1429 | CONTIG51 | 273986 | 274572 | 1.62 | 3.99E-02 | transcription_start_site | + | 277205 | 277205 | -2926 | 14001 | AN2911 |
| 1429 | CONTIG51 | 273986 | 274572 | 1.62 | 3.99E-02 | transcription_start_site | + | 278390 | 278390 | -4111 | 14002 | AN2911 |
| 1191 | CONTIG51 | 286126 | 286410 | 1.77 | 3.70E-02 | transcription_start_site | - | 285575 | 285575 | -693  | 14003 | AN2912 |
| 1191 | CONTIG51 | 286126 | 286410 | 1.77 | 3.70E-02 | transcription_start_site | - | 285425 | 285425 | -843  | 14004 | AN2912 |
| 1191 | CONTIG51 | 286126 | 286410 | 1.77 | 3.70E-02 | transcription_start_site | - | 285063 | 285063 | -1205 | 14005 | AN2912 |
| 1191 | CONTIG51 | 286126 | 286410 | 1.77 | 3.70E-02 | transcription_start_site | + | 287650 | 287650 | -1382 | 14006 | AN2913 |
| 1191 | CONTIG51 | 286126 | 286410 | 1.77 | 3.70E-02 | transcription_start_site | + | 287797 | 287797 | -1529 | 14007 | AN2913 |
| 1191 | CONTIG51 | 286126 | 286410 | 1.77 | 3.70E-02 | transcription_start_site | + | 291013 | 291013 | -4745 | 14008 | AN2914 |
| 1191 | CONTIG51 | 286126 | 286410 | 1.77 | 3.70E-02 | transcription_start_site | + | 291130 | 291130 | -4862 | 14009 | AN2914 |
| 571  | CONTIG51 | 306231 | 306652 | 2.35 | 1.22E-03 | transcription_start_site | - | 305813 | 305813 | -628  | 14030 | AN2919 |
| 571  | CONTIG51 | 306231 | 306652 | 2.35 | 1.22E-03 | transcription_start_site | - | 305242 | 305242 | -1199 | 14031 | AN2919 |
| 571  | CONTIG51 | 306231 | 306652 | 2.35 | 1.22E-03 | transcription_start_site | - | 304692 | 304692 | -1749 | 14032 | AN2919 |



|      |          |        |        |      |          |                          |   |        |        |       |       |        |
|------|----------|--------|--------|------|----------|--------------------------|---|--------|--------|-------|-------|--------|
| 571  | CONTIG51 | 306231 | 306652 | 2.35 | 1.22E-03 | transcription_start_site | + | 306674 | 306674 | -232  | 14033 | AN2920 |
| 609  | CONTIG51 | 311110 | 311394 | 2.3  | 5.20E-03 | transcription_start_site | - | 311858 | 311858 | 606   | 14037 | AN2921 |
| 609  | CONTIG51 | 311110 | 311394 | 2.3  | 5.20E-03 | transcription_start_site | + | 316393 | 316393 | -5141 | 14042 | AN2923 |
| 638  | CONTIG51 | 331578 | 331852 | 2.26 | 6.61E-03 | transcription_start_site | - | 331271 | 331271 | -444  | 14055 | AN2926 |
| 638  | CONTIG51 | 331578 | 331852 | 2.26 | 6.61E-03 | transcription_start_site | - | 331205 | 331205 | -510  | 14056 | AN2926 |
| 638  | CONTIG51 | 331578 | 331852 | 2.26 | 6.61E-03 | transcription_start_site | - | 331141 | 331141 | -574  | 14057 | AN2926 |
| 638  | CONTIG51 | 331578 | 331852 | 2.26 | 6.61E-03 | transcription_start_site | - | 330587 | 330587 | -1128 | 14058 | AN2926 |
| 638  | CONTIG51 | 331578 | 331852 | 2.26 | 6.61E-03 | transcription_start_site | - | 330220 | 330220 | -1495 | 14059 | AN2926 |
| 890  | CONTIG51 | 363842 | 364406 | 2.01 | 1.57E-02 | transcription_start_site | - | 359656 | 359656 | -4468 | 14082 | AN2936 |
| 890  | CONTIG51 | 363842 | 364406 | 2.01 | 1.57E-02 | transcription_start_site | - | 359407 | 359407 | -4717 | 14083 | AN2936 |
| 890  | CONTIG51 | 363842 | 364406 | 2.01 | 1.57E-02 | transcription_start_site | - | 358846 | 358846 | -5278 | 14084 | AN2936 |
| 1186 | CONTIG51 | 362045 | 362459 | 1.77 | 2.18E-02 | transcription_start_site | - | 359656 | 359656 | -2596 | 14082 | AN2936 |
| 1186 | CONTIG51 | 362045 | 362459 | 1.77 | 2.18E-02 | transcription_start_site | - | 359407 | 359407 | -2845 | 14083 | AN2936 |
| 1186 | CONTIG51 | 362045 | 362459 | 1.77 | 2.18E-02 | transcription_start_site | - | 358846 | 358846 | -3406 | 14084 | AN2936 |
| 890  | CONTIG51 | 363842 | 364406 | 2.01 | 1.57E-02 | transcription_start_site | + | 363508 | 363508 | 616   | 14086 | AN2937 |
| 1186 | CONTIG51 | 362045 | 362459 | 1.77 | 2.18E-02 | transcription_start_site | + | 363508 | 363508 | -1256 | 14086 | AN2937 |
| 1187 | CONTIG51 | 370652 | 371001 | 1.77 | 2.18E-02 | transcription_start_site | - | 368212 | 368212 | -2614 | 14087 | AN2938 |
| 1187 | CONTIG51 | 370652 | 371001 | 1.77 | 2.18E-02 | transcription_start_site | - | 368106 | 368106 | -2720 | 14088 | AN2938 |
| 1187 | CONTIG51 | 370652 | 371001 | 1.77 | 2.18E-02 | transcription_start_site | - | 367810 | 367810 | -3016 | 14089 | AN2938 |
| 1187 | CONTIG51 | 370652 | 371001 | 1.77 | 2.18E-02 | transcription_start_site | - | 367700 | 367700 | -3126 | 14090 | AN2938 |
| 1187 | CONTIG51 | 370652 | 371001 | 1.77 | 2.18E-02 | transcription_start_site | - | 367264 | 367264 | -3562 | 14091 | AN2938 |
| 1187 | CONTIG51 | 370652 | 371001 | 1.77 | 2.18E-02 | transcription_start_site | - | 366756 | 366756 | -4070 | 14092 | AN2938 |
| 1187 | CONTIG51 | 370652 | 371001 | 1.77 | 2.18E-02 | transcription_start_site | - | 366451 | 366451 | -4375 | 14093 | AN2938 |
| 1187 | CONTIG51 | 370652 | 371001 | 1.77 | 2.18E-02 | transcription_start_site | - | 370571 | 370571 | -255  | 14094 | AN2939 |
| 1187 | CONTIG51 | 370652 | 371001 | 1.77 | 2.18E-02 | transcription_start_site | - | 370426 | 370426 | -400  | 14095 | AN2939 |
| 1187 | CONTIG51 | 370652 | 371001 | 1.77 | 2.18E-02 | transcription_start_site | - | 369853 | 369853 | -973  | 14096 | AN2939 |
| 1884 | CONTIG51 | 374637 | 374994 | 1.42 | 9.26E-02 | transcription_start_site | - | 370571 | 370571 | -4244 | 14094 | AN2939 |
| 1884 | CONTIG51 | 374637 | 374994 | 1.42 | 9.26E-02 | transcription_start_site | - | 370426 | 370426 | -4389 | 14095 | AN2939 |
| 1884 | CONTIG51 | 374637 | 374994 | 1.42 | 9.26E-02 | transcription_start_site | - | 369853 | 369853 | -4962 | 14096 | AN2939 |
| 1884 | CONTIG51 | 374637 | 374994 | 1.42 | 9.26E-02 | transcription_start_site | - | 374318 | 374318 | -497  | 14097 | AN2940 |
| 1884 | CONTIG51 | 374637 | 374994 | 1.42 | 9.26E-02 | transcription_start_site | - | 373456 | 373456 | -1359 | 14098 | AN2940 |
| 572  | CONTIG51 | 384237 | 384591 | 2.35 | 4.61E-03 | transcription_start_site | - | 383275 | 383275 | -1139 | 14105 | AN2942 |
| 572  | CONTIG51 | 384237 | 384591 | 2.35 | 4.61E-03 | transcription_start_site | - | 382789 | 382789 | -1625 | 14106 | AN2942 |
| 1534 | CONTIG51 | 387077 | 387356 | 1.57 | 6.84E-02 | transcription_start_site | - | 383275 | 383275 | -3941 | 14105 | AN2942 |
| 1534 | CONTIG51 | 387077 | 387356 | 1.57 | 6.84E-02 | transcription_start_site | - | 382789 | 382789 | -4427 | 14106 | AN2942 |
| 572  | CONTIG51 | 384237 | 384591 | 2.35 | 4.61E-03 | transcription_start_site | + | 384661 | 384661 | -247  | 14107 | AN2943 |
| 572  | CONTIG51 | 384237 | 384591 | 2.35 | 4.61E-03 | transcription_start_site | + | 385918 | 385918 | -1504 | 14108 | AN2943 |
| 68   | CONTIG51 | 390087 | 390426 | 3.33 | 0.00E+00 | transcription_start_site | - | 388927 | 388927 | -1329 | 14109 | AN2944 |
| 68   | CONTIG51 | 390087 | 390426 | 3.33 | 0.00E+00 | transcription_start_site | - | 388346 | 388346 | -1910 | 14110 | AN2944 |
| 1534 | CONTIG51 | 387077 | 387356 | 1.57 | 6.84E-02 | transcription_start_site | - | 388346 | 388346 | 1129  | 14110 | AN2944 |
| 1656 | CONTIG51 | 388582 | 388866 | 1.52 | 8.01E-02 | transcription_start_site | - | 388927 | 388927 | 203   | 14109 | AN2944 |
| 1656 | CONTIG51 | 388582 | 388866 | 1.52 | 8.01E-02 | transcription_start_site | - | 388346 | 388346 | -378  | 14110 | AN2944 |
| 2146 | CONTIG51 | 392337 | 392623 | 1.32 | 1.44E-01 | transcription_start_site | - | 388927 | 388927 | -3553 | 14109 | AN2944 |
| 2146 | CONTIG51 | 392337 | 392623 | 1.32 | 1.44E-01 | transcription_start_site | - | 388346 | 388346 | -4134 | 14110 | AN2944 |
| 1436 | CONTIG51 | 399902 | 400181 | 1.62 | 5.88E-02 | transcription_start_site | + | 401192 | 401192 | -1150 | 14111 | AN2946 |
| 1436 | CONTIG51 | 399902 | 400181 | 1.62 | 5.88E-02 | transcription_start_site | + | 403589 | 403589 | -3547 | 14112 | AN2946 |
| 1436 | CONTIG51 | 399902 | 400181 | 1.62 | 5.88E-02 | transcription_start_site | + | 403940 | 403940 | -3898 | 14113 | AN2946 |
| 119  | CONTIG51 | 421576 | 421860 | 3.14 | 0.00E+00 | transcription_start_site | - | 416996 | 416996 | -4722 | 14126 | AN2951 |
| 1131 | CONTIG51 | 419552 | 419989 | 1.81 | 3.08E-02 | transcription_start_site | - | 416996 | 416996 | -2774 | 14126 | AN2951 |
| 1131 | CONTIG51 | 419552 | 419989 | 1.81 | 3.08E-02 | transcription_start_site | + | 418828 | 418828 | 942   | 14130 | AN2952 |
| 610  | CONTIG51 | 424671 | 424925 | 2.3  | 5.20E-03 | transcription_start_site | - | 423790 | 423790 | -1008 | 14131 | AN2953 |
| 1258 | CONTIG51 | 422946 | 423210 | 1.72 | 4.36E-02 | transcription_start_site | - | 423790 | 423790 | 712   | 14131 | AN2953 |
| 1885 | CONTIG51 | 426906 | 428170 | 1.42 | 9.26E-02 | transcription_start_site | - | 423790 | 423790 | -3748 | 14131 | AN2953 |
| 945  | CONTIG51 | 429906 | 430645 | 1.96 | 3.45E-03 | transcription_start_site | - | 429607 | 429607 | -668  | 14132 | AN2954 |
| 945  | CONTIG51 | 429906 | 430645 | 1.96 | 3.45E-03 | transcription_start_site | - | 427032 | 427032 | -3243 | 14133 | AN2954 |
| 1188 | CONTIG51 | 428851 | 429370 | 1.77 | 2.18E-02 | transcription_start_site | - | 429607 | 429607 | 496   | 14132 | AN2954 |
| 1188 | CONTIG51 | 428851 | 429370 | 1.77 | 2.18E-02 | transcription_start_site | - | 427032 | 427032 | -2078 | 14133 | AN2954 |

|      |          |        |        |      |          |                          |   |        |        |       |       |        |
|------|----------|--------|--------|------|----------|--------------------------|---|--------|--------|-------|-------|--------|
| 1885 | CONTIG51 | 426906 | 428170 | 1.42 | 9.26E-02 | transcription_start_site | - | 427032 | 427032 | -506  | 14133 | AN2954 |
| 945  | CONTIG51 | 429906 | 430645 | 1.96 | 3.45E-03 | transcription_start_site | + | 431649 | 431649 | -1373 | 14134 | AN2955 |
| 945  | CONTIG51 | 429906 | 430645 | 1.96 | 3.45E-03 | transcription_start_site | + | 431919 | 431919 | -1643 | 14135 | AN2955 |
| 1188 | CONTIG51 | 428851 | 429370 | 1.77 | 2.18E-02 | transcription_start_site | + | 431649 | 431649 | -2538 | 14134 | AN2955 |
| 1188 | CONTIG51 | 428851 | 429370 | 1.77 | 2.18E-02 | transcription_start_site | + | 431919 | 431919 | -2808 | 14135 | AN2955 |
| 1885 | CONTIG51 | 426906 | 428170 | 1.42 | 9.26E-02 | transcription_start_site | + | 431649 | 431649 | -4111 | 14134 | AN2955 |
| 1885 | CONTIG51 | 426906 | 428170 | 1.42 | 9.26E-02 | transcription_start_site | + | 431919 | 431919 | -4381 | 14135 | AN2955 |
| 639  | CONTIG51 | 439876 | 440170 | 2.26 | 6.61E-03 | transcription_start_site | + | 441177 | 441177 | -1154 | 14136 | AN2956 |
| 639  | CONTIG51 | 439876 | 440170 | 2.26 | 6.61E-03 | transcription_start_site | + | 441432 | 441432 | -1409 | 14137 | AN2956 |
| 639  | CONTIG51 | 439876 | 440170 | 2.26 | 6.61E-03 | transcription_start_site | + | 441675 | 441675 | -1652 | 14138 | AN2956 |
| 639  | CONTIG51 | 439876 | 440170 | 2.26 | 6.61E-03 | transcription_start_site | + | 442536 | 442536 | -2513 | 14139 | AN2956 |
| 639  | CONTIG51 | 439876 | 440170 | 2.26 | 6.61E-03 | transcription_start_site | + | 443046 | 443046 | -3023 | 14140 | AN2956 |
| 639  | CONTIG51 | 439876 | 440170 | 2.26 | 6.61E-03 | transcription_start_site | + | 443451 | 443451 | -3428 | 14141 | AN2956 |
| 639  | CONTIG51 | 439876 | 440170 | 2.26 | 6.61E-03 | transcription_start_site | + | 443575 | 443575 | -3552 | 14142 | AN2956 |
| 431  | CONTIG51 | 445583 | 446079 | 2.55 | 1.80E-03 | transcription_start_site | - | 445561 | 445561 | -270  | 14143 | AN2957 |
| 431  | CONTIG51 | 445583 | 446079 | 2.55 | 1.80E-03 | transcription_start_site | - | 444998 | 444998 | -833  | 14144 | AN2957 |
| 431  | CONTIG51 | 445583 | 446079 | 2.55 | 1.80E-03 | transcription_start_site | - | 444556 | 444556 | -1275 | 14145 | AN2957 |
| 431  | CONTIG51 | 445583 | 446079 | 2.55 | 1.80E-03 | transcription_start_site | + | 446410 | 446410 | -579  | 14146 | AN2958 |
| 431  | CONTIG51 | 445583 | 446079 | 2.55 | 1.80E-03 | transcription_start_site | + | 446535 | 446535 | -704  | 14147 | AN2958 |
| 431  | CONTIG51 | 445583 | 446079 | 2.55 | 1.80E-03 | transcription_start_site | + | 446788 | 446788 | -957  | 14148 | AN2958 |
| 431  | CONTIG51 | 445583 | 446079 | 2.55 | 1.80E-03 | transcription_start_site | + | 447040 | 447040 | -1209 | 14149 | AN2958 |
| 431  | CONTIG51 | 445583 | 446079 | 2.55 | 1.80E-03 | transcription_start_site | + | 447221 | 447221 | -1390 | 14150 | AN2958 |
| 431  | CONTIG51 | 445583 | 446079 | 2.55 | 1.80E-03 | transcription_start_site | + | 447511 | 447511 | -1680 | 14151 | AN2958 |
| 431  | CONTIG51 | 445583 | 446079 | 2.55 | 1.80E-03 | transcription_start_site | + | 447634 | 447634 | -1803 | 14152 | AN2958 |
| 431  | CONTIG51 | 445583 | 446079 | 2.55 | 1.80E-03 | transcription_start_site | + | 448069 | 448069 | -2238 | 14153 | AN2958 |
| 2425 | CONTIG51 | 466443 | 466779 | 1.23 | 1.93E-01 | transcription_start_site | - | 461513 | 461513 | -5098 | 14164 | AN2961 |
| 2425 | CONTIG51 | 466443 | 466779 | 1.23 | 1.93E-01 | transcription_start_site | - | 466143 | 466143 | -468  | 14167 | AN2962 |
| 2425 | CONTIG51 | 466443 | 466779 | 1.23 | 1.93E-01 | transcription_start_site | - | 465987 | 465987 | -624  | 14168 | AN2962 |
| 2425 | CONTIG51 | 466443 | 466779 | 1.23 | 1.93E-01 | transcription_start_site | - | 465884 | 465884 | -727  | 14169 | AN2962 |
| 2425 | CONTIG51 | 466443 | 466779 | 1.23 | 1.93E-01 | transcription_start_site | - | 465760 | 465760 | -851  | 14170 | AN2962 |
| 2425 | CONTIG51 | 466443 | 466779 | 1.23 | 1.93E-01 | transcription_start_site | - | 465636 | 465636 | -975  | 14171 | AN2962 |
| 2425 | CONTIG51 | 466443 | 466779 | 1.23 | 1.93E-01 | transcription_start_site | - | 465492 | 465492 | -1119 | 14172 | AN2962 |
| 2425 | CONTIG51 | 466443 | 466779 | 1.23 | 1.93E-01 | transcription_start_site | - | 465357 | 465357 | -1254 | 14173 | AN2962 |
| 2425 | CONTIG51 | 466443 | 466779 | 1.23 | 1.93E-01 | transcription_start_site | - | 465232 | 465232 | -1379 | 14174 | AN2962 |
| 2425 | CONTIG51 | 466443 | 466779 | 1.23 | 1.93E-01 | transcription_start_site | - | 465056 | 465056 | -1555 | 14175 | AN2962 |
| 2425 | CONTIG51 | 466443 | 466779 | 1.23 | 1.93E-01 | transcription_start_site | - | 464929 | 464929 | -1682 | 14176 | AN2962 |
| 2425 | CONTIG51 | 466443 | 466779 | 1.23 | 1.93E-01 | transcription_start_site | - | 464844 | 464844 | -1767 | 14177 | AN2962 |
| 2425 | CONTIG51 | 466443 | 466779 | 1.23 | 1.93E-01 | transcription_start_site | - | 464762 | 464762 | -1849 | 14178 | AN2962 |
| 2425 | CONTIG51 | 466443 | 466779 | 1.23 | 1.93E-01 | transcription_start_site | - | 464680 | 464680 | -1931 | 14179 | AN2962 |
| 2425 | CONTIG51 | 466443 | 466779 | 1.23 | 1.93E-01 | transcription_start_site | - | 464600 | 464600 | -2011 | 14180 | AN2962 |
| 2425 | CONTIG51 | 466443 | 466779 | 1.23 | 1.93E-01 | transcription_start_site | - | 464340 | 464340 | -2271 | 14181 | AN2962 |
| 2425 | CONTIG51 | 466443 | 466779 | 1.23 | 1.93E-01 | transcription_start_site | - | 464207 | 464207 | -2404 | 14182 | AN2962 |
| 2425 | CONTIG51 | 466443 | 466779 | 1.23 | 1.93E-01 | transcription_start_site | - | 464032 | 464032 | -2579 | 14183 | AN2962 |
| 2425 | CONTIG51 | 466443 | 466779 | 1.23 | 1.93E-01 | transcription_start_site | - | 463808 | 463808 | -2803 | 14184 | AN2962 |
| 2425 | CONTIG51 | 466443 | 466779 | 1.23 | 1.93E-01 | transcription_start_site | - | 463681 | 463681 | -2930 | 14185 | AN2962 |
| 2425 | CONTIG51 | 466443 | 466779 | 1.23 | 1.93E-01 | transcription_start_site | - | 466812 | 466812 | 201   | 14191 | AN2963 |
| 2425 | CONTIG51 | 466443 | 466779 | 1.23 | 1.93E-01 | transcription_start_site | - | 467229 | 467229 | 618   | 14190 | AN2963 |
| 2425 | CONTIG51 | 466443 | 466779 | 1.23 | 1.93E-01 | transcription_start_site | - | 467585 | 467585 | 974   | 14189 | AN2963 |
| 840  | CONTIG51 | 483093 | 484035 | 2.06 | 1.30E-02 | transcription_start_site | - | 483101 | 483101 | -463  | 14198 | AN2967 |
| 840  | CONTIG51 | 483093 | 484035 | 2.06 | 1.30E-02 | transcription_start_site | + | 484222 | 484222 | -658  | 14199 | AN2968 |
| 840  | CONTIG51 | 483093 | 484035 | 2.06 | 1.30E-02 | transcription_start_site | + | 484476 | 484476 | -912  | 14200 | AN2968 |
| 840  | CONTIG51 | 483093 | 484035 | 2.06 | 1.30E-02 | transcription_start_site | + | 484658 | 484658 | -1094 | 14201 | AN2968 |
| 840  | CONTIG51 | 483093 | 484035 | 2.06 | 1.30E-02 | transcription_start_site | + | 485052 | 485052 | -1488 | 14202 | AN2968 |
| 840  | CONTIG51 | 483093 | 484035 | 2.06 | 1.30E-02 | transcription_start_site | + | 485184 | 485184 | -1620 | 14203 | AN2968 |
| 840  | CONTIG51 | 483093 | 484035 | 2.06 | 1.30E-02 | transcription_start_site | + | 488168 | 488168 | -4604 | 14204 | AN2969 |
| 840  | CONTIG51 | 483093 | 484035 | 2.06 | 1.30E-02 | transcription_start_site | + | 488343 | 488343 | -4779 | 14205 | AN2969 |
| 840  | CONTIG51 | 483093 | 484035 | 2.06 | 1.30E-02 | transcription_start_site | + | 488474 | 488474 | -4910 | 14206 | AN2969 |

|      |          |        |        |      |          |                          |   |        |        |       |       |        |
|------|----------|--------|--------|------|----------|--------------------------|---|--------|--------|-------|-------|--------|
| 2147 | CONTIG51 | 511070 | 511569 | 1.32 | 1.44E-01 | transcription_start_site | - | 510340 | 510340 | -979  | 14239 | AN2979 |
| 2147 | CONTIG51 | 511070 | 511569 | 1.32 | 1.44E-01 | transcription_start_site | - | 510080 | 510080 | -1239 | 14240 | AN2979 |
| 2147 | CONTIG51 | 511070 | 511569 | 1.32 | 1.44E-01 | transcription_start_site | - | 509953 | 509953 | -1366 | 14241 | AN2979 |
| 2147 | CONTIG51 | 511070 | 511569 | 1.32 | 1.44E-01 | transcription_start_site | - | 509785 | 509785 | -1534 | 14242 | AN2979 |
| 2148 | CONTIG51 | 514595 | 514930 | 1.32 | 1.44E-01 | transcription_start_site | - | 510340 | 510340 | -4422 | 14239 | AN2979 |
| 2148 | CONTIG51 | 514595 | 514930 | 1.32 | 1.44E-01 | transcription_start_site | - | 510080 | 510080 | -4682 | 14240 | AN2979 |
| 2148 | CONTIG51 | 514595 | 514930 | 1.32 | 1.44E-01 | transcription_start_site | - | 509953 | 509953 | -4809 | 14241 | AN2979 |
| 2148 | CONTIG51 | 514595 | 514930 | 1.32 | 1.44E-01 | transcription_start_site | - | 509785 | 509785 | -4977 | 14242 | AN2979 |
| 2148 | CONTIG51 | 514595 | 514930 | 1.32 | 1.44E-01 | transcription_start_site | - | 514568 | 514568 | -194  | 14243 | AN2980 |
| 2148 | CONTIG51 | 514595 | 514930 | 1.32 | 1.44E-01 | transcription_start_site | - | 514419 | 514419 | -343  | 14244 | AN2980 |
| 2148 | CONTIG51 | 514595 | 514930 | 1.32 | 1.44E-01 | transcription_start_site | - | 514274 | 514274 | -488  | 14245 | AN2980 |
| 2148 | CONTIG51 | 514595 | 514930 | 1.32 | 1.44E-01 | transcription_start_site | - | 514161 | 514161 | -601  | 14246 | AN2980 |
| 2148 | CONTIG51 | 514595 | 514930 | 1.32 | 1.44E-01 | transcription_start_site | - | 514062 | 514062 | -700  | 14247 | AN2980 |
| 2148 | CONTIG51 | 514595 | 514930 | 1.32 | 1.44E-01 | transcription_start_site | - | 513884 | 513884 | -878  | 14248 | AN2980 |
| 2148 | CONTIG51 | 514595 | 514930 | 1.32 | 1.44E-01 | transcription_start_site | + | 516991 | 516991 | -2228 | 14249 | AN2981 |
| 2148 | CONTIG51 | 514595 | 514930 | 1.32 | 1.44E-01 | transcription_start_site | + | 517305 | 517305 | -2542 | 14250 | AN2981 |
| 2148 | CONTIG51 | 514595 | 514930 | 1.32 | 1.44E-01 | transcription_start_site | + | 517440 | 517440 | -2677 | 14251 | AN2981 |
| 2148 | CONTIG51 | 514595 | 514930 | 1.32 | 1.44E-01 | transcription_start_site | + | 517522 | 517522 | -2759 | 14252 | AN2981 |
| 2148 | CONTIG51 | 514595 | 514930 | 1.32 | 1.44E-01 | transcription_start_site | + | 517936 | 517936 | -3173 | 14253 | AN2981 |
| 2148 | CONTIG51 | 514595 | 514930 | 1.32 | 1.44E-01 | transcription_start_site | + | 518195 | 518195 | -3432 | 14254 | AN2981 |
| 2148 | CONTIG51 | 514595 | 514930 | 1.32 | 1.44E-01 | transcription_start_site | + | 518332 | 518332 | -3569 | 14255 | AN2981 |
| 2148 | CONTIG51 | 514595 | 514930 | 1.32 | 1.44E-01 | transcription_start_site | + | 518459 | 518459 | -3696 | 14256 | AN2981 |
| 2148 | CONTIG51 | 514595 | 514930 | 1.32 | 1.44E-01 | transcription_start_site | + | 518719 | 518719 | -3956 | 14257 | AN2981 |
| 2148 | CONTIG51 | 514595 | 514930 | 1.32 | 1.44E-01 | transcription_start_site | + | 519148 | 519148 | -4385 | 14258 | AN2981 |
| 688  | CONTIG51 | 529507 | 529786 | 2.21 | 7.85E-03 | transcription_start_site | - | 526566 | 526566 | -3080 | 14267 | AN2983 |
| 688  | CONTIG51 | 529507 | 529786 | 2.21 | 7.85E-03 | transcription_start_site | - | 526291 | 526291 | -3355 | 14268 | AN2983 |
| 688  | CONTIG51 | 529507 | 529786 | 2.21 | 7.85E-03 | transcription_start_site | - | 526052 | 526052 | -3594 | 14269 | AN2983 |
| 688  | CONTIG51 | 529507 | 529786 | 2.21 | 7.85E-03 | transcription_start_site | - | 525893 | 525893 | -3753 | 14270 | AN2983 |
| 688  | CONTIG51 | 529507 | 529786 | 2.21 | 7.85E-03 | transcription_start_site | - | 525614 | 525614 | -4032 | 14271 | AN2983 |
| 1132 | CONTIG51 | 527107 | 527393 | 1.81 | 3.08E-02 | transcription_start_site | - | 526566 | 526566 | -684  | 14267 | AN2983 |
| 1132 | CONTIG51 | 527107 | 527393 | 1.81 | 3.08E-02 | transcription_start_site | - | 526291 | 526291 | -959  | 14268 | AN2983 |
| 1132 | CONTIG51 | 527107 | 527393 | 1.81 | 3.08E-02 | transcription_start_site | - | 526052 | 526052 | -1198 | 14269 | AN2983 |
| 1132 | CONTIG51 | 527107 | 527393 | 1.81 | 3.08E-02 | transcription_start_site | - | 525893 | 525893 | -1357 | 14270 | AN2983 |
| 1132 | CONTIG51 | 527107 | 527393 | 1.81 | 3.08E-02 | transcription_start_site | - | 525614 | 525614 | -1636 | 14271 | AN2983 |
| 1132 | CONTIG51 | 527107 | 527393 | 1.81 | 3.08E-02 | transcription_start_site | - | 523300 | 523300 | -3950 | 14272 | AN2983 |
| 688  | CONTIG51 | 529507 | 529786 | 2.21 | 7.85E-03 | transcription_start_site | + | 529198 | 529198 | 448   | 14275 | AN2984 |
| 688  | CONTIG51 | 529507 | 529786 | 2.21 | 7.85E-03 | transcription_start_site | + | 528983 | 528983 | 663   | 14274 | AN2984 |
| 688  | CONTIG51 | 529507 | 529786 | 2.21 | 7.85E-03 | transcription_start_site | + | 528863 | 528863 | 783   | 14273 | AN2984 |
| 1132 | CONTIG51 | 527107 | 527393 | 1.81 | 3.08E-02 | transcription_start_site | + | 528863 | 528863 | -1613 | 14273 | AN2984 |
| 1132 | CONTIG51 | 527107 | 527393 | 1.81 | 3.08E-02 | transcription_start_site | + | 528983 | 528983 | -1733 | 14274 | AN2984 |
| 1132 | CONTIG51 | 527107 | 527393 | 1.81 | 3.08E-02 | transcription_start_site | + | 529198 | 529198 | -1948 | 14275 | AN2984 |
| 2307 | CONTIG51 | 535052 | 535341 | 1.27 | 1.66E-01 | transcription_start_site | - | 533683 | 533683 | -1513 | 14276 | AN2985 |
| 2307 | CONTIG51 | 535052 | 535341 | 1.27 | 1.66E-01 | transcription_start_site | - | 533329 | 533329 | -1867 | 14277 | AN2985 |
| 2307 | CONTIG51 | 535052 | 535341 | 1.27 | 1.66E-01 | transcription_start_site | - | 533246 | 533246 | -1950 | 14278 | AN2985 |
| 2307 | CONTIG51 | 535052 | 535341 | 1.27 | 1.66E-01 | transcription_start_site | - | 532881 | 532881 | -2315 | 14279 | AN2985 |
| 2307 | CONTIG51 | 535052 | 535341 | 1.27 | 1.66E-01 | transcription_start_site | - | 532707 | 532707 | -2489 | 14280 | AN2985 |
| 244  | CONTIG51 | 539792 | 540366 | 2.84 | 0.00E+00 | transcription_start_site | - | 535500 | 535500 | -4579 | 14281 | AN2986 |
| 244  | CONTIG51 | 539792 | 540366 | 2.84 | 0.00E+00 | transcription_start_site | - | 535396 | 535396 | -4683 | 14282 | AN2986 |
| 244  | CONTIG51 | 539792 | 540366 | 2.84 | 0.00E+00 | transcription_start_site | - | 535310 | 535310 | -4769 | 14283 | AN2986 |
| 2307 | CONTIG51 | 535052 | 535341 | 1.27 | 1.66E-01 | transcription_start_site | - | 535310 | 535310 | 113   | 14283 | AN2986 |
| 2307 | CONTIG51 | 535052 | 535341 | 1.27 | 1.66E-01 | transcription_start_site | - | 535396 | 535396 | 199   | 14282 | AN2986 |
| 2307 | CONTIG51 | 535052 | 535341 | 1.27 | 1.66E-01 | transcription_start_site | - | 535500 | 535500 | 303   | 14281 | AN2986 |
| 2307 | CONTIG51 | 535052 | 535341 | 1.27 | 1.66E-01 | transcription_start_site | - | 534423 | 534423 | -773  | 14284 | AN2986 |
| 244  | CONTIG51 | 539792 | 540366 | 2.84 | 0.00E+00 | transcription_start_site | - | 537233 | 537233 | -2846 | 14285 | AN2987 |
| 244  | CONTIG51 | 539792 | 540366 | 2.84 | 0.00E+00 | transcription_start_site | - | 536310 | 536310 | -3769 | 14286 | AN2987 |
| 2307 | CONTIG51 | 535052 | 535341 | 1.27 | 1.66E-01 | transcription_start_site | - | 536310 | 536310 | 1113  | 14286 | AN2987 |
| 2307 | CONTIG51 | 535052 | 535341 | 1.27 | 1.66E-01 | transcription_start_site | + | 538194 | 538194 | -2997 | 14287 | AN2988 |

|      |          |        |        |      |          |                          |   |        |        |       |       |        |
|------|----------|--------|--------|------|----------|--------------------------|---|--------|--------|-------|-------|--------|
| 2307 | CONTIG51 | 535052 | 535341 | 1.27 | 1.66E-01 | transcription_start_site | + | 538339 | 538339 | -3142 | 14288 | AN2988 |
| 2307 | CONTIG51 | 535052 | 535341 | 1.27 | 1.66E-01 | transcription_start_site | + | 538432 | 538432 | -3235 | 14289 | AN2988 |
| 2307 | CONTIG51 | 535052 | 535341 | 1.27 | 1.66E-01 | transcription_start_site | + | 538536 | 538536 | -3339 | 14290 | AN2988 |
| 2307 | CONTIG51 | 535052 | 535341 | 1.27 | 1.66E-01 | transcription_start_site | + | 538611 | 538611 | -3414 | 14291 | AN2988 |
| 2307 | CONTIG51 | 535052 | 535341 | 1.27 | 1.66E-01 | transcription_start_site | + | 538757 | 538757 | -3560 | 14292 | AN2988 |
| 244  | CONTIG51 | 539792 | 540366 | 2.84 | 0.00E+00 | transcription_start_site | - | 540182 | 540182 | 103   | 14296 | AN2989 |
| 244  | CONTIG51 | 539792 | 540366 | 2.84 | 0.00E+00 | transcription_start_site | - | 540341 | 540341 | 262   | 14295 | AN2989 |
| 244  | CONTIG51 | 539792 | 540366 | 2.84 | 0.00E+00 | transcription_start_site | - | 540484 | 540484 | 405   | 14294 | AN2989 |
| 244  | CONTIG51 | 539792 | 540366 | 2.84 | 0.00E+00 | transcription_start_site | - | 540618 | 540618 | 539   | 14293 | AN2989 |
| 244  | CONTIG51 | 539792 | 540366 | 2.84 | 0.00E+00 | transcription_start_site | + | 543979 | 543979 | -3900 | 14297 | AN2990 |
| 244  | CONTIG51 | 539792 | 540366 | 2.84 | 0.00E+00 | transcription_start_site | + | 544111 | 544111 | -4032 | 14298 | AN2990 |
| 1527 | CONTIG51 | 555379 | 555815 | 1.57 | 5.05E-02 | transcription_start_site | - | 553526 | 553526 | -2071 | 14310 | AN2994 |
| 1527 | CONTIG51 | 555379 | 555815 | 1.57 | 5.05E-02 | transcription_start_site | - | 553346 | 553346 | -2251 | 14311 | AN2994 |
| 1527 | CONTIG51 | 555379 | 555815 | 1.57 | 5.05E-02 | transcription_start_site | - | 552776 | 552776 | -2821 | 14312 | AN2994 |
| 1527 | CONTIG51 | 555379 | 555815 | 1.57 | 5.05E-02 | transcription_start_site | - | 555201 | 555201 | -396  | 14313 | AN2995 |
| 1527 | CONTIG51 | 555379 | 555815 | 1.57 | 5.05E-02 | transcription_start_site | - | 555065 | 555065 | -532  | 14314 | AN2995 |
| 1527 | CONTIG51 | 555379 | 555815 | 1.57 | 5.05E-02 | transcription_start_site | - | 554578 | 554578 | -1019 | 14315 | AN2995 |
| 1527 | CONTIG51 | 555379 | 555815 | 1.57 | 5.05E-02 | transcription_start_site | - | 554305 | 554305 | -1292 | 14316 | AN2995 |
| 1527 | CONTIG51 | 555379 | 555815 | 1.57 | 5.05E-02 | transcription_start_site | + | 556138 | 556138 | -541  | 14317 | AN2996 |
| 1527 | CONTIG51 | 555379 | 555815 | 1.57 | 5.05E-02 | transcription_start_site | + | 556356 | 556356 | -759  | 14318 | AN2996 |
| 496  | CONTIG51 | 563029 | 563468 | 2.45 | 0.00E+00 | transcription_start_site | - | 558406 | 558406 | -4842 | 14319 | AN2997 |
| 496  | CONTIG51 | 563029 | 563468 | 2.45 | 0.00E+00 | transcription_start_site | - | 558287 | 558287 | -4961 | 14320 | AN2997 |
| 496  | CONTIG51 | 563029 | 563468 | 2.45 | 0.00E+00 | transcription_start_site | + | 562271 | 562271 | 977   | 14327 | AN2998 |
| 1527 | CONTIG51 | 555379 | 555815 | 1.57 | 5.05E-02 | transcription_start_site | + | 559037 | 559037 | -3440 | 14323 | AN2998 |
| 1527 | CONTIG51 | 555379 | 555815 | 1.57 | 5.05E-02 | transcription_start_site | + | 559498 | 559498 | -3901 | 14324 | AN2998 |
| 1527 | CONTIG51 | 555379 | 555815 | 1.57 | 5.05E-02 | transcription_start_site | + | 559578 | 559578 | -3981 | 14325 | AN2998 |
| 1527 | CONTIG51 | 555379 | 555815 | 1.57 | 5.05E-02 | transcription_start_site | + | 559688 | 559688 | -4091 | 14326 | AN2998 |
| 338  | CONTIG51 | 566044 | 566313 | 2.7  | 1.01E-03 | transcription_start_site | + | 565248 | 565248 | 930   | 14335 | AN2999 |
| 496  | CONTIG51 | 563029 | 563468 | 2.45 | 0.00E+00 | transcription_start_site | + | 563550 | 563550 | -301  | 14328 | AN2999 |
| 496  | CONTIG51 | 563029 | 563468 | 2.45 | 0.00E+00 | transcription_start_site | + | 564142 | 564142 | -893  | 14329 | AN2999 |
| 496  | CONTIG51 | 563029 | 563468 | 2.45 | 0.00E+00 | transcription_start_site | + | 564268 | 564268 | -1019 | 14330 | AN2999 |
| 496  | CONTIG51 | 563029 | 563468 | 2.45 | 0.00E+00 | transcription_start_site | + | 564331 | 564331 | -1082 | 14331 | AN2999 |
| 496  | CONTIG51 | 563029 | 563468 | 2.45 | 0.00E+00 | transcription_start_site | + | 564416 | 564416 | -1167 | 14332 | AN2999 |
| 496  | CONTIG51 | 563029 | 563468 | 2.45 | 0.00E+00 | transcription_start_site | + | 564608 | 564608 | -1359 | 14333 | AN2999 |
| 496  | CONTIG51 | 563029 | 563468 | 2.45 | 0.00E+00 | transcription_start_site | + | 564703 | 564703 | -1454 | 14334 | AN2999 |
| 496  | CONTIG51 | 563029 | 563468 | 2.45 | 0.00E+00 | transcription_start_site | + | 565248 | 565248 | -1999 | 14335 | AN2999 |
| 338  | CONTIG51 | 566044 | 566313 | 2.7  | 1.01E-03 | transcription_start_site | + | 568306 | 568306 | -2127 | 14336 | AN3000 |
| 496  | CONTIG51 | 563029 | 563468 | 2.45 | 0.00E+00 | transcription_start_site | + | 568306 | 568306 | -5057 | 14336 | AN3000 |
| 689  | CONTIG51 | 569029 | 569303 | 2.21 | 7.85E-03 | transcription_start_site | + | 568306 | 568306 | 860   | 14336 | AN3000 |
| 338  | CONTIG51 | 566044 | 566313 | 2.7  | 1.01E-03 | transcription_start_site | + | 570560 | 570560 | -4381 | 14337 | AN3001 |
| 689  | CONTIG51 | 569029 | 569303 | 2.21 | 7.85E-03 | transcription_start_site | + | 570560 | 570560 | -1394 | 14337 | AN3001 |
| 787  | CONTIG51 | 569704 | 570808 | 2.11 | 2.24E-03 | transcription_start_site | + | 570560 | 570560 | -304  | 14337 | AN3001 |
| 1647 | CONTIG51 | 577811 | 578245 | 1.52 | 6.16E-02 | transcription_start_site | - | 575163 | 575163 | -2865 | 14338 | AN3002 |
| 1647 | CONTIG51 | 577811 | 578245 | 1.52 | 6.16E-02 | transcription_start_site | - | 574968 | 574968 | -3060 | 14339 | AN3002 |
| 787  | CONTIG51 | 569704 | 570808 | 2.11 | 2.24E-03 | transcription_start_site | + | 575553 | 575553 | -5297 | 14340 | AN3003 |
| 787  | CONTIG51 | 569704 | 570808 | 2.11 | 2.24E-03 | transcription_start_site | + | 575752 | 575752 | -5496 | 14341 | AN3003 |
| 1647 | CONTIG51 | 577811 | 578245 | 1.52 | 6.16E-02 | transcription_start_site | + | 577606 | 577606 | 422   | 14342 | AN3004 |
| 1647 | CONTIG51 | 577811 | 578245 | 1.52 | 6.16E-02 | transcription_start_site | + | 578867 | 578867 | -839  | 14343 | AN3004 |
| 1890 | CONTIG51 | 582301 | 582595 | 1.42 | 1.08E-01 | transcription_start_site | - | 582020 | 582020 | -428  | 14344 | AN3005 |
| 1890 | CONTIG51 | 582301 | 582595 | 1.42 | 1.08E-01 | transcription_start_site | - | 581858 | 581858 | -590  | 14345 | AN3005 |
| 1890 | CONTIG51 | 582301 | 582595 | 1.42 | 1.08E-01 | transcription_start_site | - | 580256 | 580256 | -2192 | 14346 | AN3005 |
| 1890 | CONTIG51 | 582301 | 582595 | 1.42 | 1.08E-01 | transcription_start_site | - | 583419 | 583419 | 971   | 14348 | AN3006 |
| 1890 | CONTIG51 | 582301 | 582595 | 1.42 | 1.08E-01 | transcription_start_site | - | 583587 | 583587 | 1139  | 14347 | AN3006 |
| 1890 | CONTIG51 | 582301 | 582595 | 1.42 | 1.08E-01 | transcription_start_site | + | 587469 | 587469 | -5021 | 14356 | AN3009 |
| 460  | CONTIG51 | 615388 | 615729 | 2.5  | 2.22E-03 | transcription_start_site | - | 613246 | 613246 | -2312 | 14393 | AN3019 |
| 460  | CONTIG51 | 615388 | 615729 | 2.5  | 2.22E-03 | transcription_start_site | - | 612619 | 612619 | -2939 | 14394 | AN3019 |
| 460  | CONTIG51 | 615388 | 615729 | 2.5  | 2.22E-03 | transcription_start_site | - | 615520 | 615520 | -38   | 14398 | AN3020 |

|      |          |        |        |      |          |                          |   |        |        |       |       |        |
|------|----------|--------|--------|------|----------|--------------------------|---|--------|--------|-------|-------|--------|
| 460  | CONTIG51 | 615388 | 615729 | 2.5  | 2.22E-03 | transcription_start_site | - | 615130 | 615130 | -428  | 14399 | AN3020 |
| 460  | CONTIG51 | 615388 | 615729 | 2.5  | 2.22E-03 | transcription_start_site | - | 616159 | 616159 | 600   | 14397 | AN3020 |
| 460  | CONTIG51 | 615388 | 615729 | 2.5  | 2.22E-03 | transcription_start_site | + | 619952 | 619952 | -4393 | 14400 | AN3021 |
| 460  | CONTIG51 | 615388 | 615729 | 2.5  | 2.22E-03 | transcription_start_site | + | 620646 | 620646 | -5087 | 14401 | AN3021 |
| 1784 | CONTIG51 | 623556 | 623923 | 1.47 | 9.24E-02 | transcription_start_site | + | 622667 | 622667 | 1072  | 14406 | AN3021 |
| 1784 | CONTIG51 | 623556 | 623923 | 1.47 | 9.24E-02 | transcription_start_site | + | 623986 | 623986 | -246  | 14407 | AN3022 |
| 1784 | CONTIG51 | 623556 | 623923 | 1.47 | 9.24E-02 | transcription_start_site | + | 624180 | 624180 | -440  | 14408 | AN3022 |
| 1784 | CONTIG51 | 623556 | 623923 | 1.47 | 9.24E-02 | transcription_start_site | + | 624396 | 624396 | -656  | 14409 | AN3022 |
| 1784 | CONTIG51 | 623556 | 623923 | 1.47 | 9.24E-02 | transcription_start_site | + | 625196 | 625196 | -1456 | 14410 | AN3022 |
| 2005 | CONTIG51 | 645766 | 646645 | 1.37 | 8.00E-02 | transcription_start_site | - | 646809 | 646809 | 603   | 14448 | AN3032 |
| 2005 | CONTIG51 | 645766 | 646645 | 1.37 | 8.00E-02 | transcription_start_site | - | 647020 | 647020 | 814   | 14447 | AN3032 |
| 2149 | CONTIG51 | 648306 | 648575 | 1.32 | 1.44E-01 | transcription_start_site | - | 647020 | 647020 | -1420 | 14447 | AN3032 |
| 2149 | CONTIG51 | 648306 | 648575 | 1.32 | 1.44E-01 | transcription_start_site | - | 646809 | 646809 | -1631 | 14448 | AN3032 |
| 2005 | CONTIG51 | 645766 | 646645 | 1.37 | 8.00E-02 | transcription_start_site | + | 648693 | 648693 | -2487 | 14449 | AN3033 |
| 2005 | CONTIG51 | 645766 | 646645 | 1.37 | 8.00E-02 | transcription_start_site | + | 648980 | 648980 | -2774 | 14450 | AN3033 |
| 2005 | CONTIG51 | 645766 | 646645 | 1.37 | 8.00E-02 | transcription_start_site | + | 649233 | 649233 | -3027 | 14451 | AN3033 |
| 2149 | CONTIG51 | 648306 | 648575 | 1.32 | 1.44E-01 | transcription_start_site | + | 648693 | 648693 | -252  | 14449 | AN3033 |
| 2149 | CONTIG51 | 648306 | 648575 | 1.32 | 1.44E-01 | transcription_start_site | + | 648980 | 648980 | -539  | 14450 | AN3033 |
| 2149 | CONTIG51 | 648306 | 648575 | 1.32 | 1.44E-01 | transcription_start_site | + | 649233 | 649233 | -792  | 14451 | AN3033 |
| 2149 | CONTIG51 | 648306 | 648575 | 1.32 | 1.44E-01 | transcription_start_site | + | 653535 | 653535 | -5094 | 14457 | AN3035 |
| 2308 | CONTIG51 | 681083 | 681443 | 1.27 | 1.66E-01 | transcription_start_site | - | 681295 | 681295 | 32    | 14487 | AN3044 |
| 2308 | CONTIG51 | 681083 | 681443 | 1.27 | 1.66E-01 | transcription_start_site | - | 680432 | 680432 | -831  | 14488 | AN3044 |
| 2308 | CONTIG51 | 681083 | 681443 | 1.27 | 1.66E-01 | transcription_start_site | - | 680191 | 680191 | -1072 | 14489 | AN3044 |
| 2308 | CONTIG51 | 681083 | 681443 | 1.27 | 1.66E-01 | transcription_start_site | - | 680084 | 680084 | -1179 | 14490 | AN3044 |
| 2308 | CONTIG51 | 681083 | 681443 | 1.27 | 1.66E-01 | transcription_start_site | - | 679953 | 679953 | -1310 | 14491 | AN3044 |
| 2308 | CONTIG51 | 681083 | 681443 | 1.27 | 1.66E-01 | transcription_start_site | - | 679687 | 679687 | -1576 | 14492 | AN3044 |
| 2308 | CONTIG51 | 681083 | 681443 | 1.27 | 1.66E-01 | transcription_start_site | + | 685861 | 685861 | -4598 | 14497 | AN3046 |
| 1785 | CONTIG51 | 693770 | 694044 | 1.47 | 9.24E-02 | transcription_start_site | + | 693998 | 693998 | -91   | 14505 | AN3049 |
| 1785 | CONTIG51 | 693770 | 694044 | 1.47 | 9.24E-02 | transcription_start_site | + | 694327 | 694327 | -420  | 14506 | AN3049 |
| 1785 | CONTIG51 | 693770 | 694044 | 1.47 | 9.24E-02 | transcription_start_site | + | 694647 | 694647 | -740  | 14507 | AN3049 |
| 1785 | CONTIG51 | 693770 | 694044 | 1.47 | 9.24E-02 | transcription_start_site | + | 695188 | 695188 | -1281 | 14508 | AN3049 |
| 1259 | CONTIG51 | 712365 | 712629 | 1.72 | 4.36E-02 | transcription_start_site | - | 707495 | 707495 | -5002 | 14521 | AN3052 |
| 1259 | CONTIG51 | 712365 | 712629 | 1.72 | 4.36E-02 | transcription_start_site | - | 711998 | 711998 | -499  | 14522 | AN3053 |
| 1259 | CONTIG51 | 712365 | 712629 | 1.72 | 4.36E-02 | transcription_start_site | - | 711150 | 711150 | -1347 | 14523 | AN3053 |
| 2309 | CONTIG51 | 717680 | 717964 | 1.27 | 1.66E-01 | transcription_start_site | - | 717053 | 717053 | -769  | 14524 | AN3054 |
| 2309 | CONTIG51 | 717680 | 717964 | 1.27 | 1.66E-01 | transcription_start_site | - | 716742 | 716742 | -1080 | 14525 | AN3054 |
| 2309 | CONTIG51 | 717680 | 717964 | 1.27 | 1.66E-01 | transcription_start_site | - | 716572 | 716572 | -1250 | 14526 | AN3054 |
| 2309 | CONTIG51 | 717680 | 717964 | 1.27 | 1.66E-01 | transcription_start_site | - | 716378 | 716378 | -1444 | 14527 | AN3054 |
| 2309 | CONTIG51 | 717680 | 717964 | 1.27 | 1.66E-01 | transcription_start_site | - | 716209 | 716209 | -1613 | 14528 | AN3054 |
| 2309 | CONTIG51 | 717680 | 717964 | 1.27 | 1.66E-01 | transcription_start_site | - | 715647 | 715647 | -2175 | 14529 | AN3054 |
| 2309 | CONTIG51 | 717680 | 717964 | 1.27 | 1.66E-01 | transcription_start_site | - | 715507 | 715507 | -2315 | 14530 | AN3054 |
| 2309 | CONTIG51 | 717680 | 717964 | 1.27 | 1.66E-01 | transcription_start_site | - | 714907 | 714907 | -2915 | 14531 | AN3054 |
| 2309 | CONTIG51 | 717680 | 717964 | 1.27 | 1.66E-01 | transcription_start_site | - | 714727 | 714727 | -3095 | 14532 | AN3054 |
| 2309 | CONTIG51 | 717680 | 717964 | 1.27 | 1.66E-01 | transcription_start_site | - | 714603 | 714603 | -3219 | 14533 | AN3054 |
| 2309 | CONTIG51 | 717680 | 717964 | 1.27 | 1.66E-01 | transcription_start_site | - | 714443 | 714443 | -3379 | 14534 | AN3054 |
| 1259 | CONTIG51 | 712365 | 712629 | 1.72 | 4.36E-02 | transcription_start_site | + | 717365 | 717365 | -4868 | 14535 | AN3055 |
| 2309 | CONTIG51 | 717680 | 717964 | 1.27 | 1.66E-01 | transcription_start_site | + | 717758 | 717758 | 64    | 14536 | AN3055 |
| 2309 | CONTIG51 | 717680 | 717964 | 1.27 | 1.66E-01 | transcription_start_site | + | 717365 | 717365 | 457   | 14535 | AN3055 |
| 2309 | CONTIG51 | 717680 | 717964 | 1.27 | 1.66E-01 | transcription_start_site | + | 720581 | 720581 | -2759 | 14539 | AN3057 |
| 2309 | CONTIG51 | 717680 | 717964 | 1.27 | 1.66E-01 | transcription_start_site | + | 720789 | 720789 | -2967 | 14540 | AN3057 |
| 1336 | CONTIG51 | 725790 | 726054 | 1.67 | 5.22E-02 | transcription_start_site | - | 724414 | 724414 | -1508 | 14541 | AN3058 |
| 1336 | CONTIG51 | 725790 | 726054 | 1.67 | 5.22E-02 | transcription_start_site | - | 724313 | 724313 | -1609 | 14542 | AN3058 |
| 1336 | CONTIG51 | 725790 | 726054 | 1.67 | 5.22E-02 | transcription_start_site | - | 724166 | 724166 | -1756 | 14543 | AN3058 |
| 1336 | CONTIG51 | 725790 | 726054 | 1.67 | 5.22E-02 | transcription_start_site | - | 723745 | 723745 | -2177 | 14544 | AN3058 |
| 1336 | CONTIG51 | 725790 | 726054 | 1.67 | 5.22E-02 | transcription_start_site | + | 726267 | 726267 | -345  | 14545 | AN3059 |
| 1336 | CONTIG51 | 725790 | 726054 | 1.67 | 5.22E-02 | transcription_start_site | + | 726366 | 726366 | -444  | 14546 | AN3059 |
| 1336 | CONTIG51 | 725790 | 726054 | 1.67 | 5.22E-02 | transcription_start_site | + | 727748 | 727748 | -1826 | 14547 | AN3059 |

|      |          |        |        |      |          |                          |   |        |        |       |       |        |
|------|----------|--------|--------|------|----------|--------------------------|---|--------|--------|-------|-------|--------|
| 1336 | CONTIG51 | 725790 | 726054 | 1.67 | 5.22E-02 | transcription_start_site | + | 729460 | 729460 | -3538 | 14552 | AN3061 |
| 1336 | CONTIG51 | 725790 | 726054 | 1.67 | 5.22E-02 | transcription_start_site | + | 729832 | 729832 | -3910 | 14553 | AN3061 |
| 1336 | CONTIG51 | 725790 | 726054 | 1.67 | 5.22E-02 | transcription_start_site | + | 730217 | 730217 | -4295 | 14554 | AN3061 |
| 1336 | CONTIG51 | 725790 | 726054 | 1.67 | 5.22E-02 | transcription_start_site | + | 730720 | 730720 | -4798 | 14555 | AN3061 |
| 2020 | CONTIG51 | 753760 | 754114 | 1.37 | 1.25E-01 | transcription_start_site | - | 751996 | 751996 | -1941 | 14574 | AN3067 |
| 2020 | CONTIG51 | 753760 | 754114 | 1.37 | 1.25E-01 | transcription_start_site | - | 751295 | 751295 | -2642 | 14575 | AN3067 |
| 2020 | CONTIG51 | 753760 | 754114 | 1.37 | 1.25E-01 | transcription_start_site | - | 751152 | 751152 | -2785 | 14576 | AN3067 |
| 2020 | CONTIG51 | 753760 | 754114 | 1.37 | 1.25E-01 | transcription_start_site | + | 752813 | 752813 | 1124  | 14578 | AN3068 |
| 2020 | CONTIG51 | 753760 | 754114 | 1.37 | 1.25E-01 | transcription_start_site | + | 756649 | 756649 | -2712 | 14579 | AN3070 |
| 2020 | CONTIG51 | 753760 | 754114 | 1.37 | 1.25E-01 | transcription_start_site | + | 756740 | 756740 | -2803 | 14580 | AN3070 |
| 2020 | CONTIG51 | 753760 | 754114 | 1.37 | 1.25E-01 | transcription_start_site | + | 756891 | 756891 | -2954 | 14581 | AN3070 |
| 2020 | CONTIG51 | 753760 | 754114 | 1.37 | 1.25E-01 | transcription_start_site | + | 756968 | 756968 | -3031 | 14582 | AN3070 |
| 2020 | CONTIG51 | 753760 | 754114 | 1.37 | 1.25E-01 | transcription_start_site | + | 757061 | 757061 | -3124 | 14583 | AN3070 |
| 2020 | CONTIG51 | 753760 | 754114 | 1.37 | 1.25E-01 | transcription_start_site | + | 757135 | 757135 | -3198 | 14584 | AN3070 |
| 2020 | CONTIG51 | 753760 | 754114 | 1.37 | 1.25E-01 | transcription_start_site | + | 757359 | 757359 | -3422 | 14585 | AN3070 |
| 310  | CONTIG51 | 768230 | 769426 | 2.75 | 0.00E+00 | transcription_start_site | + | 770027 | 770027 | -1199 | 14592 | AN3074 |
| 310  | CONTIG51 | 768230 | 769426 | 2.75 | 0.00E+00 | transcription_start_site | + | 770405 | 770405 | -1577 | 14593 | AN3074 |
| 310  | CONTIG51 | 768230 | 769426 | 2.75 | 0.00E+00 | transcription_start_site | + | 770742 | 770742 | -1914 | 14594 | AN3074 |
| 432  | CONTIG51 | 770110 | 770394 | 2.55 | 1.80E-03 | transcription_start_site | + | 770405 | 770405 | -153  | 14593 | AN3074 |
| 432  | CONTIG51 | 770110 | 770394 | 2.55 | 1.80E-03 | transcription_start_site | + | 770027 | 770027 | 225   | 14592 | AN3074 |
| 432  | CONTIG51 | 770110 | 770394 | 2.55 | 1.80E-03 | transcription_start_site | + | 770742 | 770742 | -490  | 14594 | AN3074 |
| 1430 | CONTIG51 | 771020 | 771669 | 1.62 | 3.99E-02 | transcription_start_site | + | 770742 | 770742 | 602   | 14594 | AN3074 |
| 1430 | CONTIG51 | 771020 | 771669 | 1.62 | 3.99E-02 | transcription_start_site | + | 770405 | 770405 | 939   | 14593 | AN3074 |
| 1430 | CONTIG51 | 771020 | 771669 | 1.62 | 3.99E-02 | transcription_start_site | + | 770027 | 770027 | 1317  | 14592 | AN3074 |
| 611  | CONTIG51 | 779490 | 779829 | 2.3  | 5.20E-03 | transcription_start_site | - | 777501 | 777501 | -2158 | 14595 | AN3075 |
| 611  | CONTIG51 | 779490 | 779829 | 2.3  | 5.20E-03 | transcription_start_site | - | 776835 | 776835 | -2824 | 14596 | AN3075 |
| 611  | CONTIG51 | 779490 | 779829 | 2.3  | 5.20E-03 | transcription_start_site | - | 776702 | 776702 | -2957 | 14597 | AN3075 |
| 741  | CONTIG51 | 776707 | 777586 | 2.16 | 0.00E+00 | transcription_start_site | - | 776835 | 776835 | -311  | 14596 | AN3075 |
| 741  | CONTIG51 | 776707 | 777586 | 2.16 | 0.00E+00 | transcription_start_site | - | 777501 | 777501 | 354   | 14595 | AN3075 |
| 741  | CONTIG51 | 776707 | 777586 | 2.16 | 0.00E+00 | transcription_start_site | - | 776702 | 776702 | -444  | 14597 | AN3075 |
| 1337 | CONTIG51 | 776117 | 776676 | 1.67 | 5.22E-02 | transcription_start_site | - | 776702 | 776702 | 305   | 14597 | AN3075 |
| 1337 | CONTIG51 | 776117 | 776676 | 1.67 | 5.22E-02 | transcription_start_site | - | 776835 | 776835 | 438   | 14596 | AN3075 |
| 1337 | CONTIG51 | 776117 | 776676 | 1.67 | 5.22E-02 | transcription_start_site | - | 777501 | 777501 | 1104  | 14595 | AN3075 |
| 611  | CONTIG51 | 779490 | 779829 | 2.3  | 5.20E-03 | transcription_start_site | + | 779937 | 779937 | -277  | 14598 | AN3076 |
| 611  | CONTIG51 | 779490 | 779829 | 2.3  | 5.20E-03 | transcription_start_site | + | 780455 | 780455 | -795  | 14599 | AN3076 |
| 611  | CONTIG51 | 779490 | 779829 | 2.3  | 5.20E-03 | transcription_start_site | + | 780754 | 780754 | -1094 | 14600 | AN3076 |
| 741  | CONTIG51 | 776707 | 777586 | 2.16 | 0.00E+00 | transcription_start_site | + | 779937 | 779937 | -2790 | 14598 | AN3076 |
| 741  | CONTIG51 | 776707 | 777586 | 2.16 | 0.00E+00 | transcription_start_site | + | 780455 | 780455 | -3308 | 14599 | AN3076 |
| 741  | CONTIG51 | 776707 | 777586 | 2.16 | 0.00E+00 | transcription_start_site | + | 780754 | 780754 | -3607 | 14600 | AN3076 |
| 1337 | CONTIG51 | 776117 | 776676 | 1.67 | 5.22E-02 | transcription_start_site | + | 779937 | 779937 | -3540 | 14598 | AN3076 |
| 1337 | CONTIG51 | 776117 | 776676 | 1.67 | 5.22E-02 | transcription_start_site | + | 780455 | 780455 | -4058 | 14599 | AN3076 |
| 1337 | CONTIG51 | 776117 | 776676 | 1.67 | 5.22E-02 | transcription_start_site | + | 780754 | 780754 | -4357 | 14600 | AN3076 |
| 1    | CONTIG51 | 792233 | 792657 | 4.02 | 0.00E+00 | transcription_start_site | - | 787945 | 787945 | -4500 | 14601 | AN3077 |
| 1    | CONTIG51 | 792233 | 792657 | 4.02 | 0.00E+00 | transcription_start_site | - | 787652 | 787652 | -4793 | 14602 | AN3077 |
| 311  | CONTIG51 | 791343 | 791985 | 2.75 | 9.51E-04 | transcription_start_site | - | 787945 | 787945 | -3719 | 14601 | AN3077 |
| 311  | CONTIG51 | 791343 | 791985 | 2.75 | 9.51E-04 | transcription_start_site | - | 787652 | 787652 | -4012 | 14602 | AN3077 |
| 339  | CONTIG51 | 789753 | 790178 | 2.7  | 1.01E-03 | transcription_start_site | - | 787945 | 787945 | -2020 | 14601 | AN3077 |
| 339  | CONTIG51 | 789753 | 790178 | 2.7  | 1.01E-03 | transcription_start_site | - | 787652 | 787652 | -2313 | 14602 | AN3077 |
| 749  | CONTIG51 | 790433 | 791085 | 2.16 | 8.81E-03 | transcription_start_site | - | 787945 | 787945 | -2814 | 14601 | AN3077 |
| 749  | CONTIG51 | 790433 | 791085 | 2.16 | 8.81E-03 | transcription_start_site | - | 787652 | 787652 | -3107 | 14602 | AN3077 |
| 339  | CONTIG51 | 789753 | 790178 | 2.7  | 1.01E-03 | transcription_start_site | + | 789676 | 789676 | 289   | 14604 | AN3078 |
| 339  | CONTIG51 | 789753 | 790178 | 2.7  | 1.01E-03 | transcription_start_site | + | 789496 | 789496 | 469   | 14603 | AN3078 |
| 749  | CONTIG51 | 790433 | 791085 | 2.16 | 8.81E-03 | transcription_start_site | + | 789676 | 789676 | 1083  | 14604 | AN3078 |
| 749  | CONTIG51 | 790433 | 791085 | 2.16 | 8.81E-03 | transcription_start_site | + | 789496 | 789496 | 1263  | 14603 | AN3078 |
| 1    | CONTIG51 | 792233 | 792657 | 4.02 | 0.00E+00 | transcription_start_site | - | 791804 | 791804 | -641  | 14605 | AN3079 |
| 311  | CONTIG51 | 791343 | 791985 | 2.75 | 9.51E-04 | transcription_start_site | - | 791804 | 791804 | 140   | 14605 | AN3079 |
| 749  | CONTIG51 | 790433 | 791085 | 2.16 | 8.81E-03 | transcription_start_site | - | 791804 | 791804 | 1045  | 14605 | AN3079 |



|      |          |        |        |      |          |                          |   |        |        |       |       |        |
|------|----------|--------|--------|------|----------|--------------------------|---|--------|--------|-------|-------|--------|
| 2426 | CONTIG51 | 795843 | 796177 | 1.23 | 1.93E-01 | transcription_start_site | - | 791804 | 791804 | -4206 | 14605 | AN3079 |
| 1    | CONTIG51 | 792233 | 792657 | 4.02 | 0.00E+00 | transcription_start_site | - | 793592 | 793592 | 1147  | 14610 | AN3080 |
| 2426 | CONTIG51 | 795843 | 796177 | 1.23 | 1.93E-01 | transcription_start_site | - | 796246 | 796246 | 236   | 14606 | AN3080 |
| 2426 | CONTIG51 | 795843 | 796177 | 1.23 | 1.93E-01 | transcription_start_site | - | 794850 | 794850 | -1160 | 14607 | AN3080 |
| 2426 | CONTIG51 | 795843 | 796177 | 1.23 | 1.93E-01 | transcription_start_site | - | 794704 | 794704 | -1306 | 14608 | AN3080 |
| 2426 | CONTIG51 | 795843 | 796177 | 1.23 | 1.93E-01 | transcription_start_site | - | 793833 | 793833 | -2177 | 14609 | AN3080 |
| 2426 | CONTIG51 | 795843 | 796177 | 1.23 | 1.93E-01 | transcription_start_site | - | 793592 | 793592 | -2418 | 14610 | AN3080 |
| 1    | CONTIG51 | 792233 | 792657 | 4.02 | 0.00E+00 | transcription_start_site | + | 796662 | 796662 | -4217 | 14611 | AN3081 |
| 1    | CONTIG51 | 792233 | 792657 | 4.02 | 0.00E+00 | transcription_start_site | + | 796769 | 796769 | -4324 | 14612 | AN3081 |
| 1    | CONTIG51 | 792233 | 792657 | 4.02 | 0.00E+00 | transcription_start_site | + | 797218 | 797218 | -4773 | 14613 | AN3081 |
| 1    | CONTIG51 | 792233 | 792657 | 4.02 | 0.00E+00 | transcription_start_site | + | 797430 | 797430 | -4985 | 14614 | AN3081 |
| 1    | CONTIG51 | 792233 | 792657 | 4.02 | 0.00E+00 | transcription_start_site | + | 797614 | 797614 | -5169 | 14615 | AN3081 |
| 311  | CONTIG51 | 791343 | 791985 | 2.75 | 9.51E-04 | transcription_start_site | + | 796662 | 796662 | -4998 | 14611 | AN3081 |
| 311  | CONTIG51 | 791343 | 791985 | 2.75 | 9.51E-04 | transcription_start_site | + | 796769 | 796769 | -5105 | 14612 | AN3081 |
| 2426 | CONTIG51 | 795843 | 796177 | 1.23 | 1.93E-01 | transcription_start_site | + | 796662 | 796662 | -652  | 14611 | AN3081 |
| 2426 | CONTIG51 | 795843 | 796177 | 1.23 | 1.93E-01 | transcription_start_site | + | 796769 | 796769 | -759  | 14612 | AN3081 |
| 2426 | CONTIG51 | 795843 | 796177 | 1.23 | 1.93E-01 | transcription_start_site | + | 797218 | 797218 | -1208 | 14613 | AN3081 |
| 2426 | CONTIG51 | 795843 | 796177 | 1.23 | 1.93E-01 | transcription_start_site | + | 797430 | 797430 | -1420 | 14614 | AN3081 |
| 2426 | CONTIG51 | 795843 | 796177 | 1.23 | 1.93E-01 | transcription_start_site | + | 797614 | 797614 | -1604 | 14615 | AN3081 |
| 2426 | CONTIG51 | 795843 | 796177 | 1.23 | 1.93E-01 | transcription_start_site | + | 797877 | 797877 | -1867 | 14616 | AN3081 |
| 2426 | CONTIG51 | 795843 | 796177 | 1.23 | 1.93E-01 | transcription_start_site | + | 798390 | 798390 | -2380 | 14617 | AN3081 |
| 2426 | CONTIG51 | 795843 | 796177 | 1.23 | 1.93E-01 | transcription_start_site | + | 798528 | 798528 | -2518 | 14618 | AN3081 |
| 340  | CONTIG51 | 812493 | 812842 | 2.7  | 1.01E-03 | transcription_start_site | - | 811986 | 811986 | -681  | 14626 | AN3085 |
| 340  | CONTIG51 | 812493 | 812842 | 2.7  | 1.01E-03 | transcription_start_site | - | 811531 | 811531 | -1136 | 14627 | AN3085 |
| 841  | CONTIG51 | 818183 | 818527 | 2.06 | 1.30E-02 | transcription_start_site | - | 816393 | 816393 | -1962 | 14628 | AN3086 |
| 841  | CONTIG51 | 818183 | 818527 | 2.06 | 1.30E-02 | transcription_start_site | + | 819112 | 819112 | -757  | 14629 | AN3087 |
| 841  | CONTIG51 | 818183 | 818527 | 2.06 | 1.30E-02 | transcription_start_site | + | 819521 | 819521 | -1166 | 14630 | AN3087 |
| 841  | CONTIG51 | 818183 | 818527 | 2.06 | 1.30E-02 | transcription_start_site | + | 821284 | 821284 | -2929 | 14631 | AN3088 |
| 841  | CONTIG51 | 818183 | 818527 | 2.06 | 1.30E-02 | transcription_start_site | + | 821419 | 821419 | -3064 | 14632 | AN3088 |
| 841  | CONTIG51 | 818183 | 818527 | 2.06 | 1.30E-02 | transcription_start_site | + | 821550 | 821550 | -3195 | 14633 | AN3088 |
| 841  | CONTIG51 | 818183 | 818527 | 2.06 | 1.30E-02 | transcription_start_site | + | 821733 | 821733 | -3378 | 14634 | AN3088 |
| 841  | CONTIG51 | 818183 | 818527 | 2.06 | 1.30E-02 | transcription_start_site | + | 821944 | 821944 | -3589 | 14635 | AN3088 |
| 841  | CONTIG51 | 818183 | 818527 | 2.06 | 1.30E-02 | transcription_start_site | + | 822114 | 822114 | -3759 | 14636 | AN3088 |
| 120  | CONTIG51 | 876458 | 876804 | 3.14 | 0.00E+00 | transcription_start_site | - | 874661 | 874661 | -1970 | 14682 | AN3101 |
| 120  | CONTIG51 | 876458 | 876804 | 3.14 | 0.00E+00 | transcription_start_site | + | 877650 | 877650 | -1019 | 14685 | AN3102 |
| 120  | CONTIG51 | 876458 | 876804 | 3.14 | 0.00E+00 | transcription_start_site | + | 878107 | 878107 | -1476 | 14686 | AN3102 |
| 120  | CONTIG51 | 876458 | 876804 | 3.14 | 0.00E+00 | transcription_start_site | + | 878565 | 878565 | -1934 | 14687 | AN3102 |
| 120  | CONTIG51 | 876458 | 876804 | 3.14 | 0.00E+00 | transcription_start_site | + | 881194 | 881194 | -4563 | 14688 | AN3102 |
| 1333 | CONTIG51 | 907577 | 907941 | 1.67 | 3.33E-02 | transcription_start_site | - | 904708 | 904708 | -3051 | 14703 | AN3109 |
| 1333 | CONTIG51 | 907577 | 907941 | 1.67 | 3.33E-02 | transcription_start_site | - | 904662 | 904662 | -3097 | 14704 | AN3109 |
| 1333 | CONTIG51 | 907577 | 907941 | 1.67 | 3.33E-02 | transcription_start_site | - | 908076 | 908076 | 317   | 14705 | AN3110 |
| 1333 | CONTIG51 | 907577 | 907941 | 1.67 | 3.33E-02 | transcription_start_site | - | 905921 | 905921 | -1838 | 14706 | AN3110 |
| 1333 | CONTIG51 | 907577 | 907941 | 1.67 | 3.33E-02 | transcription_start_site | + | 909120 | 909120 | -1361 | 14707 | AN3111 |
| 1333 | CONTIG51 | 907577 | 907941 | 1.67 | 3.33E-02 | transcription_start_site | + | 909881 | 909881 | -2122 | 14708 | AN3111 |
| 1333 | CONTIG51 | 907577 | 907941 | 1.67 | 3.33E-02 | transcription_start_site | + | 910269 | 910269 | -2510 | 14709 | AN3111 |
| 1333 | CONTIG51 | 907577 | 907941 | 1.67 | 3.33E-02 | transcription_start_site | + | 910448 | 910448 | -2689 | 14710 | AN3111 |
| 1333 | CONTIG51 | 907577 | 907941 | 1.67 | 3.33E-02 | transcription_start_site | + | 910746 | 910746 | -2987 | 14711 | AN3111 |
| 953  | CONTIG51 | 915695 | 916414 | 1.96 | 1.84E-02 | transcription_start_site | - | 913774 | 913774 | -2280 | 14712 | AN3112 |
| 953  | CONTIG51 | 915695 | 916414 | 1.96 | 1.84E-02 | transcription_start_site | - | 913627 | 913627 | -2427 | 14713 | AN3112 |
| 953  | CONTIG51 | 915695 | 916414 | 1.96 | 1.84E-02 | transcription_start_site | - | 913503 | 913503 | -2551 | 14714 | AN3112 |
| 953  | CONTIG51 | 915695 | 916414 | 1.96 | 1.84E-02 | transcription_start_site | - | 913365 | 913365 | -2689 | 14715 | AN3112 |
| 953  | CONTIG51 | 915695 | 916414 | 1.96 | 1.84E-02 | transcription_start_site | - | 912948 | 912948 | -3106 | 14716 | AN3112 |
| 953  | CONTIG51 | 915695 | 916414 | 1.96 | 1.84E-02 | transcription_start_site | - | 912470 | 912470 | -3584 | 14717 | AN3112 |
| 953  | CONTIG51 | 915695 | 916414 | 1.96 | 1.84E-02 | transcription_start_site | + | 916945 | 916945 | -890  | 14718 | AN3113 |
| 953  | CONTIG51 | 915695 | 916414 | 1.96 | 1.84E-02 | transcription_start_site | + | 917140 | 917140 | -1085 | 14719 | AN3113 |
| 953  | CONTIG51 | 915695 | 916414 | 1.96 | 1.84E-02 | transcription_start_site | + | 917280 | 917280 | -1225 | 14720 | AN3113 |
| 953  | CONTIG51 | 915695 | 916414 | 1.96 | 1.84E-02 | transcription_start_site | + | 917562 | 917562 | -1507 | 14721 | AN3113 |

|      |          |        |        |      |          |                          |   |        |        |       |       |        |
|------|----------|--------|--------|------|----------|--------------------------|---|--------|--------|-------|-------|--------|
| 953  | CONTIG51 | 915695 | 916414 | 1.96 | 1.84E-02 | transcription_start_site | + | 918022 | 918022 | -1967 | 14722 | AN3113 |
| 403  | CONTIG51 | 919068 | 919402 | 2.6  | 1.54E-03 | transcription_start_site | + | 919849 | 919849 | -614  | 14723 | AN3114 |
| 953  | CONTIG51 | 915695 | 916414 | 1.96 | 1.84E-02 | transcription_start_site | + | 919849 | 919849 | -3794 | 14723 | AN3114 |
| 1535 | CONTIG51 | 919593 | 920227 | 1.57 | 6.84E-02 | transcription_start_site | + | 919849 | 919849 | 61    | 14723 | AN3114 |
| 1058 | CONTIG51 | 939544 | 940268 | 1.86 | 1.00E-02 | transcription_start_site | - | 934928 | 934928 | -4978 | 14738 | AN3118 |
| 1058 | CONTIG51 | 939544 | 940268 | 1.86 | 1.00E-02 | transcription_start_site | - | 934668 | 934668 | -5238 | 14739 | AN3118 |
| 1536 | CONTIG51 | 936544 | 936883 | 1.57 | 6.84E-02 | transcription_start_site | - | 934928 | 934928 | -1785 | 14738 | AN3118 |
| 1536 | CONTIG51 | 936544 | 936883 | 1.57 | 6.84E-02 | transcription_start_site | - | 934668 | 934668 | -2045 | 14739 | AN3118 |
| 1536 | CONTIG51 | 936544 | 936883 | 1.57 | 6.84E-02 | transcription_start_site | - | 934491 | 934491 | -2222 | 14740 | AN3118 |
| 1536 | CONTIG51 | 936544 | 936883 | 1.57 | 6.84E-02 | transcription_start_site | - | 934268 | 934268 | -2445 | 14741 | AN3118 |
| 1536 | CONTIG51 | 936544 | 936883 | 1.57 | 6.84E-02 | transcription_start_site | - | 933814 | 933814 | -2899 | 14742 | AN3118 |
| 1058 | CONTIG51 | 939544 | 940268 | 1.86 | 1.00E-02 | transcription_start_site | - | 936207 | 936207 | -3699 | 14743 | AN3119 |
| 1536 | CONTIG51 | 936544 | 936883 | 1.57 | 6.84E-02 | transcription_start_site | - | 936207 | 936207 | -506  | 14743 | AN3119 |
| 1058 | CONTIG51 | 939544 | 940268 | 1.86 | 1.00E-02 | transcription_start_site | + | 938556 | 938556 | 1350  | 14747 | AN3120 |
| 1536 | CONTIG51 | 936544 | 936883 | 1.57 | 6.84E-02 | transcription_start_site | + | 937003 | 937003 | -289  | 14744 | AN3120 |
| 1536 | CONTIG51 | 936544 | 936883 | 1.57 | 6.84E-02 | transcription_start_site | + | 937200 | 937200 | -486  | 14745 | AN3120 |
| 1536 | CONTIG51 | 936544 | 936883 | 1.57 | 6.84E-02 | transcription_start_site | + | 937450 | 937450 | -736  | 14746 | AN3120 |
| 1536 | CONTIG51 | 936544 | 936883 | 1.57 | 6.84E-02 | transcription_start_site | + | 938556 | 938556 | -1842 | 14747 | AN3120 |
| 1058 | CONTIG51 | 939544 | 940268 | 1.86 | 1.00E-02 | transcription_start_site | + | 940604 | 940604 | -698  | 14748 | AN3121 |
| 1058 | CONTIG51 | 939544 | 940268 | 1.86 | 1.00E-02 | transcription_start_site | + | 941011 | 941011 | -1105 | 14749 | AN3121 |
| 1058 | CONTIG51 | 939544 | 940268 | 1.86 | 1.00E-02 | transcription_start_site | + | 941193 | 941193 | -1287 | 14750 | AN3121 |
| 1536 | CONTIG51 | 936544 | 936883 | 1.57 | 6.84E-02 | transcription_start_site | + | 940604 | 940604 | -3890 | 14748 | AN3121 |
| 1536 | CONTIG51 | 936544 | 936883 | 1.57 | 6.84E-02 | transcription_start_site | + | 941011 | 941011 | -4297 | 14749 | AN3121 |
| 1536 | CONTIG51 | 936544 | 936883 | 1.57 | 6.84E-02 | transcription_start_site | + | 941193 | 941193 | -4479 | 14750 | AN3121 |
| 108  | CONTIG51 | 954903 | 955192 | 3.19 | 0.00E+00 | transcription_start_site | - | 954808 | 954808 | -239  | 14762 | AN3124 |
| 108  | CONTIG51 | 954903 | 955192 | 3.19 | 0.00E+00 | transcription_start_site | - | 954405 | 954405 | -642  | 14763 | AN3124 |
| 108  | CONTIG51 | 954903 | 955192 | 3.19 | 0.00E+00 | transcription_start_site | - | 953344 | 953344 | -1703 | 14764 | AN3124 |
| 108  | CONTIG51 | 954903 | 955192 | 3.19 | 0.00E+00 | transcription_start_site | - | 953166 | 953166 | -1881 | 14765 | AN3124 |
| 108  | CONTIG51 | 954903 | 955192 | 3.19 | 0.00E+00 | transcription_start_site | - | 952597 | 952597 | -2450 | 14766 | AN3124 |
| 108  | CONTIG51 | 954903 | 955192 | 3.19 | 0.00E+00 | transcription_start_site | - | 952480 | 952480 | -2567 | 14767 | AN3124 |
| 108  | CONTIG51 | 954903 | 955192 | 3.19 | 0.00E+00 | transcription_start_site | + | 955500 | 955500 | -452  | 14768 | AN3125 |
| 108  | CONTIG51 | 954903 | 955192 | 3.19 | 0.00E+00 | transcription_start_site | + | 955571 | 955571 | -523  | 14769 | AN3125 |
| 108  | CONTIG51 | 954903 | 955192 | 3.19 | 0.00E+00 | transcription_start_site | + | 955717 | 955717 | -669  | 14770 | AN3125 |
| 108  | CONTIG51 | 954903 | 955192 | 3.19 | 0.00E+00 | transcription_start_site | + | 955915 | 955915 | -867  | 14771 | AN3125 |
| 154  | CONTIG51 | 967728 | 968092 | 3.04 | 2.67E-04 | transcription_start_site | + | 969035 | 969035 | -1125 | 14775 | AN3129 |
| 154  | CONTIG51 | 967728 | 968092 | 3.04 | 2.67E-04 | transcription_start_site | + | 969389 | 969389 | -1479 | 14776 | AN3129 |
| 154  | CONTIG51 | 967728 | 968092 | 3.04 | 2.67E-04 | transcription_start_site | + | 969731 | 969731 | -1821 | 14777 | AN3129 |
| 154  | CONTIG51 | 967728 | 968092 | 3.04 | 2.67E-04 | transcription_start_site | + | 970605 | 970605 | -2695 | 14778 | AN3129 |
| 154  | CONTIG51 | 967728 | 968092 | 3.04 | 2.67E-04 | transcription_start_site | + | 970739 | 970739 | -2829 | 14779 | AN3129 |
| 531  | CONTIG51 | 966678 | 967112 | 2.4  | 4.46E-04 | transcription_start_site | + | 969035 | 969035 | -2140 | 14775 | AN3129 |
| 531  | CONTIG51 | 966678 | 967112 | 2.4  | 4.46E-04 | transcription_start_site | + | 969389 | 969389 | -2494 | 14776 | AN3129 |
| 531  | CONTIG51 | 966678 | 967112 | 2.4  | 4.46E-04 | transcription_start_site | + | 969731 | 969731 | -2836 | 14777 | AN3129 |
| 531  | CONTIG51 | 966678 | 967112 | 2.4  | 4.46E-04 | transcription_start_site | + | 970605 | 970605 | -3710 | 14778 | AN3129 |
| 531  | CONTIG51 | 966678 | 967112 | 2.4  | 4.46E-04 | transcription_start_site | + | 970739 | 970739 | -3844 | 14779 | AN3129 |
| 684  | CONTIG51 | 964063 | 964627 | 2.21 | 3.31E-03 | transcription_start_site | + | 969035 | 969035 | -4690 | 14775 | AN3129 |
| 684  | CONTIG51 | 964063 | 964627 | 2.21 | 3.31E-03 | transcription_start_site | + | 969389 | 969389 | -5044 | 14776 | AN3129 |
| 792  | CONTIG51 | 982667 | 983151 | 2.11 | 1.11E-02 | transcription_start_site | + | 982021 | 982021 | 888   | 14794 | AN3134 |
| 792  | CONTIG51 | 982667 | 983151 | 2.11 | 1.11E-02 | transcription_start_site | - | 982852 | 982852 | -57   | 14795 | AN3135 |
| 792  | CONTIG51 | 982667 | 983151 | 2.11 | 1.11E-02 | transcription_start_site | + | 983950 | 983950 | -1041 | 14796 | AN3136 |
| 792  | CONTIG51 | 982667 | 983151 | 2.11 | 1.11E-02 | transcription_start_site | + | 984139 | 984139 | -1230 | 14797 | AN3136 |
| 792  | CONTIG51 | 982667 | 983151 | 2.11 | 1.11E-02 | transcription_start_site | + | 988106 | 988106 | -5197 | 14798 | AN3137 |
| 1133 | CONTIG51 | 994742 | 995011 | 1.81 | 3.08E-02 | transcription_start_site | - | 994744 | 994744 | -132  | 14804 | AN3139 |
| 1133 | CONTIG51 | 994742 | 995011 | 1.81 | 3.08E-02 | transcription_start_site | - | 994308 | 994308 | -568  | 14805 | AN3139 |
| 1133 | CONTIG51 | 994742 | 995011 | 1.81 | 3.08E-02 | transcription_start_site | - | 994103 | 994103 | -773  | 14806 | AN3139 |
| 1636 | CONTIG51 | 998494 | 999369 | 1.52 | 4.45E-02 | transcription_start_site | - | 994744 | 994744 | -4187 | 14804 | AN3139 |
| 1636 | CONTIG51 | 998494 | 999369 | 1.52 | 4.45E-02 | transcription_start_site | - | 994308 | 994308 | -4623 | 14805 | AN3139 |
| 1636 | CONTIG51 | 998494 | 999369 | 1.52 | 4.45E-02 | transcription_start_site | - | 994103 | 994103 | -4828 | 14806 | AN3139 |

|      |          |         |         |      |          |                          |   |         |         |       |       |        |
|------|----------|---------|---------|------|----------|--------------------------|---|---------|---------|-------|-------|--------|
| 1133 | CONTIG51 | 994742  | 995011  | 1.81 | 3.08E-02 | transcription_start_site | + | 995165  | 995165  | -288  | 14807 | AN3140 |
| 1133 | CONTIG51 | 994742  | 995011  | 1.81 | 3.08E-02 | transcription_start_site | + | 995780  | 995780  | -903  | 14808 | AN3140 |
| 1133 | CONTIG51 | 994742  | 995011  | 1.81 | 3.08E-02 | transcription_start_site | + | 996436  | 996436  | -1559 | 14809 | AN3140 |
| 1260 | CONTIG51 | 1004630 | 1005589 | 1.72 | 4.36E-02 | transcription_start_site | - | 1000937 | 1000937 | -4172 | 14810 | AN3141 |
| 1260 | CONTIG51 | 1004630 | 1005589 | 1.72 | 4.36E-02 | transcription_start_site | - | 1000815 | 1000815 | -4294 | 14811 | AN3141 |
| 1260 | CONTIG51 | 1004630 | 1005589 | 1.72 | 4.36E-02 | transcription_start_site | - | 1000565 | 1000565 | -4544 | 14812 | AN3141 |
| 1260 | CONTIG51 | 1004630 | 1005589 | 1.72 | 4.36E-02 | transcription_start_site | - | 1004091 | 1004091 | -1018 | 14813 | AN3142 |
| 1260 | CONTIG51 | 1004630 | 1005589 | 1.72 | 4.36E-02 | transcription_start_site | - | 1003122 | 1003122 | -1987 | 14814 | AN3142 |
| 500  | CONTIG51 | 1013263 | 1013605 | 2.45 | 3.03E-03 | transcription_start_site | - | 1010983 | 1010983 | -2451 | 14815 | AN3143 |
| 573  | CONTIG51 | 1012218 | 1012705 | 2.35 | 4.61E-03 | transcription_start_site | - | 1010983 | 1010983 | -1478 | 14815 | AN3143 |
| 574  | CONTIG51 | 1032303 | 1032577 | 2.35 | 4.61E-03 | transcription_start_site | - | 1033533 | 1033533 | 1093  | 14826 | AN3147 |
| 574  | CONTIG51 | 1032303 | 1032577 | 2.35 | 4.61E-03 | transcription_start_site | + | 1034479 | 1034479 | -2039 | 14827 | AN3148 |
| 574  | CONTIG51 | 1032303 | 1032577 | 2.35 | 4.61E-03 | transcription_start_site | + | 1034610 | 1034610 | -2170 | 14828 | AN3148 |
| 574  | CONTIG51 | 1032303 | 1032577 | 2.35 | 4.61E-03 | transcription_start_site | + | 1037127 | 1037127 | -4687 | 14829 | AN3148 |
| 1528 | CONTIG51 | 1030888 | 1031977 | 1.57 | 5.05E-02 | transcription_start_site | + | 1034479 | 1034479 | -3046 | 14827 | AN3148 |
| 1528 | CONTIG51 | 1030888 | 1031977 | 1.57 | 5.05E-02 | transcription_start_site | + | 1034610 | 1034610 | -3177 | 14828 | AN3148 |
| 0    | CONTIG51 | 1054142 | 1054561 | 4.07 | 0.00E+00 | transcription_start_site | + | 1054842 | 1054842 | -490  | 14840 | AN3152 |
| 0    | CONTIG51 | 1054142 | 1054561 | 4.07 | 0.00E+00 | transcription_start_site | + | 1054948 | 1054948 | -596  | 14841 | AN3152 |
| 0    | CONTIG51 | 1054142 | 1054561 | 4.07 | 0.00E+00 | transcription_start_site | + | 1055811 | 1055811 | -1459 | 14842 | AN3152 |
| 0    | CONTIG51 | 1054142 | 1054561 | 4.07 | 0.00E+00 | transcription_start_site | + | 1056197 | 1056197 | -1845 | 14843 | AN3152 |
| 3    | CONTIG51 | 1056452 | 1058008 | 3.97 | 0.00E+00 | transcription_start_site | + | 1056197 | 1056197 | 1033  | 14843 | AN3152 |
| 3    | CONTIG51 | 1056452 | 1058008 | 3.97 | 0.00E+00 | transcription_start_site | + | 1055811 | 1055811 | 1419  | 14842 | AN3152 |
| 1338 | CONTIG51 | 1052120 | 1052544 | 1.67 | 5.22E-02 | transcription_start_site | + | 1054842 | 1054842 | -2510 | 14840 | AN3152 |
| 1338 | CONTIG51 | 1052120 | 1052544 | 1.67 | 5.22E-02 | transcription_start_site | + | 1054948 | 1054948 | -2616 | 14841 | AN3152 |
| 1338 | CONTIG51 | 1052120 | 1052544 | 1.67 | 5.22E-02 | transcription_start_site | + | 1055811 | 1055811 | -3479 | 14842 | AN3152 |
| 1338 | CONTIG51 | 1052120 | 1052544 | 1.67 | 5.22E-02 | transcription_start_site | + | 1056197 | 1056197 | -3865 | 14843 | AN3152 |
| 3    | CONTIG51 | 1056452 | 1058008 | 3.97 | 0.00E+00 | transcription_start_site | + | 1062610 | 1062610 | -5380 | 14844 | AN3153 |
| 1134 | CONTIG51 | 1084221 | 1084855 | 1.81 | 3.08E-02 | transcription_start_site | - | 1080859 | 1080859 | -3679 | 14866 | AN3159 |
| 1134 | CONTIG51 | 1084221 | 1084855 | 1.81 | 3.08E-02 | transcription_start_site | - | 1079955 | 1079955 | -4583 | 14867 | AN3159 |
| 1134 | CONTIG51 | 1084221 | 1084855 | 1.81 | 3.08E-02 | transcription_start_site | - | 1079655 | 1079655 | -4883 | 14868 | AN3159 |
| 1134 | CONTIG51 | 1084221 | 1084855 | 1.81 | 3.08E-02 | transcription_start_site | - | 1083325 | 1083325 | -1213 | 14869 | AN3160 |
| 1134 | CONTIG51 | 1084221 | 1084855 | 1.81 | 3.08E-02 | transcription_start_site | - | 1083030 | 1083030 | -1508 | 14870 | AN3160 |
| 1134 | CONTIG51 | 1084221 | 1084855 | 1.81 | 3.08E-02 | transcription_start_site | - | 1082710 | 1082710 | -1828 | 14871 | AN3160 |
| 1134 | CONTIG51 | 1084221 | 1084855 | 1.81 | 3.08E-02 | transcription_start_site | - | 1082426 | 1082426 | -2112 | 14872 | AN3160 |
| 1134 | CONTIG51 | 1084221 | 1084855 | 1.81 | 3.08E-02 | transcription_start_site | - | 1082302 | 1082302 | -2236 | 14873 | AN3160 |
| 1134 | CONTIG51 | 1084221 | 1084855 | 1.81 | 3.08E-02 | transcription_start_site | + | 1084749 | 1084749 | -211  | 14874 | AN3161 |
| 1134 | CONTIG51 | 1084221 | 1084855 | 1.81 | 3.08E-02 | transcription_start_site | + | 1085413 | 1085413 | -875  | 14875 | AN3161 |
| 1134 | CONTIG51 | 1084221 | 1084855 | 1.81 | 3.08E-02 | transcription_start_site | + | 1085562 | 1085562 | -1024 | 14876 | AN3161 |
| 1134 | CONTIG51 | 1084221 | 1084855 | 1.81 | 3.08E-02 | transcription_start_site | + | 1087160 | 1087160 | -2622 | 14877 | AN3162 |
| 1134 | CONTIG51 | 1084221 | 1084855 | 1.81 | 3.08E-02 | transcription_start_site | + | 1087636 | 1087636 | -3098 | 14878 | AN3162 |
| 690  | CONTIG51 | 1088778 | 1089127 | 2.21 | 7.85E-03 | transcription_start_site | + | 1089185 | 1089185 | -232  | 14879 | AN3163 |
| 690  | CONTIG51 | 1088778 | 1089127 | 2.21 | 7.85E-03 | transcription_start_site | + | 1089436 | 1089436 | -483  | 14880 | AN3163 |
| 690  | CONTIG51 | 1088778 | 1089127 | 2.21 | 7.85E-03 | transcription_start_site | + | 1089619 | 1089619 | -666  | 14881 | AN3163 |
| 690  | CONTIG51 | 1088778 | 1089127 | 2.21 | 7.85E-03 | transcription_start_site | + | 1090157 | 1090157 | -1204 | 14882 | AN3163 |
| 1134 | CONTIG51 | 1084221 | 1084855 | 1.81 | 3.08E-02 | transcription_start_site | + | 1089185 | 1089185 | -4647 | 14879 | AN3163 |
| 1134 | CONTIG51 | 1084221 | 1084855 | 1.81 | 3.08E-02 | transcription_start_site | + | 1089436 | 1089436 | -4898 | 14880 | AN3163 |
| 1134 | CONTIG51 | 1084221 | 1084855 | 1.81 | 3.08E-02 | transcription_start_site | + | 1089619 | 1089619 | -5081 | 14881 | AN3163 |
| 690  | CONTIG51 | 1088778 | 1089127 | 2.21 | 7.85E-03 | transcription_start_site | + | 1090824 | 1090824 | -1871 | 14883 | AN3164 |
| 2150 | CONTIG51 | 1091553 | 1091927 | 1.32 | 1.44E-01 | transcription_start_site | + | 1090824 | 1090824 | 916   | 14883 | AN3164 |
| 690  | CONTIG51 | 1088778 | 1089127 | 2.21 | 7.85E-03 | transcription_start_site | + | 1092613 | 1092613 | -3660 | 14884 | AN3165 |
| 690  | CONTIG51 | 1088778 | 1089127 | 2.21 | 7.85E-03 | transcription_start_site | + | 1092871 | 1092871 | -3918 | 14885 | AN3165 |
| 2150 | CONTIG51 | 1091553 | 1091927 | 1.32 | 1.44E-01 | transcription_start_site | + | 1092613 | 1092613 | -873  | 14884 | AN3165 |
| 2150 | CONTIG51 | 1091553 | 1091927 | 1.32 | 1.44E-01 | transcription_start_site | + | 1092871 | 1092871 | -1131 | 14885 | AN3165 |
| 2    | CONTIG52 | 15526   | 16105   | 4.02 | 0.00E+00 | transcription_start_site | - | 12302   | 12302   | -3513 | 14915 | AN3178 |
| 2    | CONTIG52 | 15526   | 16105   | 4.02 | 0.00E+00 | transcription_start_site | - | 11800   | 11800   | -4015 | 14916 | AN3178 |
| 2    | CONTIG52 | 15526   | 16105   | 4.02 | 0.00E+00 | transcription_start_site | - | 16056   | 16056   | 240   | 14917 | AN3179 |
| 2    | CONTIG52 | 15526   | 16105   | 4.02 | 0.00E+00 | transcription_start_site | - | 15466   | 15466   | -349  | 14918 | AN3179 |

|      |          |       |       |      |          |                          |   |       |       |       |       |        |
|------|----------|-------|-------|------|----------|--------------------------|---|-------|-------|-------|-------|--------|
| 2    | CONTIG52 | 15526 | 16105 | 4.02 | 0.00E+00 | transcription_start_site | - | 13977 | 13977 | -1838 | 14919 | AN3179 |
| 137  | CONTIG52 | 19956 | 20320 | 3.09 | 1.54E-03 | transcription_start_site | - | 16056 | 16056 | -4082 | 14917 | AN3179 |
| 137  | CONTIG52 | 19956 | 20320 | 3.09 | 1.54E-03 | transcription_start_site | - | 15466 | 15466 | -4672 | 14918 | AN3179 |
| 1800 | CONTIG52 | 17796 | 18665 | 1.46 | 1.79E-01 | transcription_start_site | - | 16056 | 16056 | -2174 | 14917 | AN3179 |
| 1800 | CONTIG52 | 17796 | 18665 | 1.46 | 1.79E-01 | transcription_start_site | - | 15466 | 15466 | -2764 | 14918 | AN3179 |
| 1800 | CONTIG52 | 17796 | 18665 | 1.46 | 1.79E-01 | transcription_start_site | - | 13977 | 13977 | -4253 | 14919 | AN3179 |
| 137  | CONTIG52 | 19956 | 20320 | 3.09 | 1.54E-03 | transcription_start_site | - | 19805 | 19805 | -333  | 14920 | AN3180 |
| 137  | CONTIG52 | 19956 | 20320 | 3.09 | 1.54E-03 | transcription_start_site | - | 19603 | 19603 | -535  | 14921 | AN3180 |
| 137  | CONTIG52 | 19956 | 20320 | 3.09 | 1.54E-03 | transcription_start_site | - | 18738 | 18738 | -1400 | 14922 | AN3180 |
| 1800 | CONTIG52 | 17796 | 18665 | 1.46 | 1.79E-01 | transcription_start_site | - | 18738 | 18738 | 507   | 14922 | AN3180 |
| 1800 | CONTIG52 | 17796 | 18665 | 1.46 | 1.79E-01 | transcription_start_site | - | 19603 | 19603 | 1372  | 14921 | AN3180 |
| 1065 | CONTIG52 | 49128 | 49492 | 1.86 | 6.84E-02 | transcription_start_site | - | 48493 | 48493 | -817  | 14938 | AN3188 |
| 1065 | CONTIG52 | 49128 | 49492 | 1.86 | 6.84E-02 | transcription_start_site | - | 48272 | 48272 | -1038 | 14939 | AN3188 |
| 1065 | CONTIG52 | 49128 | 49492 | 1.86 | 6.84E-02 | transcription_start_site | - | 48130 | 48130 | -1180 | 14940 | AN3188 |
| 1065 | CONTIG52 | 49128 | 49492 | 1.86 | 6.84E-02 | transcription_start_site | - | 47861 | 47861 | -1449 | 14941 | AN3188 |
| 1065 | CONTIG52 | 49128 | 49492 | 1.86 | 6.84E-02 | transcription_start_site | - | 47388 | 47388 | -1922 | 14942 | AN3188 |
| 1065 | CONTIG52 | 49128 | 49492 | 1.86 | 6.84E-02 | transcription_start_site | - | 45919 | 45919 | -3391 | 14943 | AN3188 |
| 1065 | CONTIG52 | 49128 | 49492 | 1.86 | 6.84E-02 | transcription_start_site | - | 45104 | 45104 | -4206 | 14944 | AN3188 |
| 1310 | CONTIG52 | 62857 | 63141 | 1.69 | 1.08E-01 | transcription_start_site | - | 58038 | 58038 | -4961 | 14945 | AN3190 |
| 1310 | CONTIG52 | 62857 | 63141 | 1.69 | 1.08E-01 | transcription_start_site | - | 57951 | 57951 | -5048 | 14946 | AN3190 |
| 1310 | CONTIG52 | 62857 | 63141 | 1.69 | 1.08E-01 | transcription_start_site | - | 59525 | 59525 | -3474 | 14948 | AN3191 |
| 1310 | CONTIG52 | 62857 | 63141 | 1.69 | 1.08E-01 | transcription_start_site | - | 59325 | 59325 | -3674 | 14949 | AN3191 |
| 1310 | CONTIG52 | 62857 | 63141 | 1.69 | 1.08E-01 | transcription_start_site | - | 58506 | 58506 | -4493 | 14950 | AN3191 |
| 392  | CONTIG52 | 65412 | 65686 | 2.62 | 7.85E-03 | transcription_start_site | - | 65282 | 65282 | -267  | 14951 | AN3193 |
| 1541 | CONTIG52 | 73802 | 74301 | 1.57 | 1.28E-01 | transcription_start_site | - | 70687 | 70687 | -3364 | 14955 | AN3195 |
| 1541 | CONTIG52 | 73802 | 74301 | 1.57 | 1.28E-01 | transcription_start_site | - | 70246 | 70246 | -3805 | 14956 | AN3195 |
| 1541 | CONTIG52 | 73802 | 74301 | 1.57 | 1.28E-01 | transcription_start_site | - | 69901 | 69901 | -4150 | 14957 | AN3195 |
| 1541 | CONTIG52 | 73802 | 74301 | 1.57 | 1.28E-01 | transcription_start_site | - | 69511 | 69511 | -4540 | 14958 | AN3195 |
| 1541 | CONTIG52 | 73802 | 74301 | 1.57 | 1.28E-01 | transcription_start_site | - | 69230 | 69230 | -4821 | 14959 | AN3195 |
| 1541 | CONTIG52 | 73802 | 74301 | 1.57 | 1.28E-01 | transcription_start_site | + | 73848 | 73848 | 203   | 14961 | AN3197 |
| 1541 | CONTIG52 | 73802 | 74301 | 1.57 | 1.28E-01 | transcription_start_site | + | 74649 | 74649 | -597  | 14962 | AN3197 |
| 1375 | CONTIG53 | 4820  | 5309  | 1.65 | 8.01E-02 | transcription_start_site | + | 4985  | 4985  | 79    | 14974 | AN3201 |
| 1375 | CONTIG53 | 4820  | 5309  | 1.65 | 8.01E-02 | transcription_start_site | + | 8575  | 8575  | -3510 | 14975 | AN3202 |
| 1375 | CONTIG53 | 4820  | 5309  | 1.65 | 8.01E-02 | transcription_start_site | + | 8750  | 8750  | -3685 | 14976 | AN3202 |
| 1375 | CONTIG53 | 4820  | 5309  | 1.65 | 8.01E-02 | transcription_start_site | + | 9008  | 9008  | -3943 | 14977 | AN3202 |
| 1375 | CONTIG53 | 4820  | 5309  | 1.65 | 8.01E-02 | transcription_start_site | + | 9394  | 9394  | -4329 | 14978 | AN3202 |
| 1375 | CONTIG53 | 4820  | 5309  | 1.65 | 8.01E-02 | transcription_start_site | + | 9765  | 9765  | -4700 | 14979 | AN3202 |
| 332  | CONTIG53 | 10955 | 11614 | 2.71 | 0.00E+00 | transcription_start_site | + | 11363 | 11363 | -78   | 14980 | AN3203 |
| 2127 | CONTIG53 | 15235 | 15514 | 1.33 | 1.93E-01 | transcription_start_site | + | 19806 | 19806 | -4431 | 14983 | AN3205 |
| 1990 | CONTIG53 | 24227 | 24586 | 1.38 | 1.66E-01 | transcription_start_site | + | 24299 | 24299 | 107   | 14987 | AN3206 |
| 1990 | CONTIG53 | 24227 | 24586 | 1.38 | 1.66E-01 | transcription_start_site | + | 23505 | 23505 | 901   | 14986 | AN3206 |
| 1990 | CONTIG53 | 24227 | 24586 | 1.38 | 1.66E-01 | transcription_start_site | + | 23404 | 23404 | 1002  | 14985 | AN3206 |
| 1990 | CONTIG53 | 24227 | 24586 | 1.38 | 1.66E-01 | transcription_start_site | + | 26735 | 26735 | -2328 | 14988 | AN3207 |
| 1990 | CONTIG53 | 24227 | 24586 | 1.38 | 1.66E-01 | transcription_start_site | + | 27103 | 27103 | -2696 | 14989 | AN3207 |
| 1990 | CONTIG53 | 24227 | 24586 | 1.38 | 1.66E-01 | transcription_start_site | + | 27197 | 27197 | -2790 | 14990 | AN3207 |
| 1990 | CONTIG53 | 24227 | 24586 | 1.38 | 1.66E-01 | transcription_start_site | + | 27320 | 27320 | -2913 | 14991 | AN3207 |
| 1990 | CONTIG53 | 24227 | 24586 | 1.38 | 1.66E-01 | transcription_start_site | + | 27726 | 27726 | -3319 | 14992 | AN3207 |
| 1990 | CONTIG53 | 24227 | 24586 | 1.38 | 1.66E-01 | transcription_start_site | + | 27925 | 27925 | -3518 | 14993 | AN3207 |
| 1990 | CONTIG53 | 24227 | 24586 | 1.38 | 1.66E-01 | transcription_start_site | + | 28216 | 28216 | -3809 | 14994 | AN3207 |
| 1990 | CONTIG53 | 24227 | 24586 | 1.38 | 1.66E-01 | transcription_start_site | + | 28477 | 28477 | -4070 | 14995 | AN3207 |
| 1990 | CONTIG53 | 24227 | 24586 | 1.38 | 1.66E-01 | transcription_start_site | + | 28675 | 28675 | -4268 | 14996 | AN3207 |
| 1991 | CONTIG53 | 30918 | 31332 | 1.38 | 1.66E-01 | transcription_start_site | - | 31105 | 31105 | -20   | 14997 | AN3208 |
| 1991 | CONTIG53 | 30918 | 31332 | 1.38 | 1.66E-01 | transcription_start_site | + | 31495 | 31495 | -370  | 14998 | AN3209 |
| 1991 | CONTIG53 | 30918 | 31332 | 1.38 | 1.66E-01 | transcription_start_site | + | 31650 | 31650 | -525  | 14999 | AN3209 |
| 375  | CONTIG53 | 41496 | 41920 | 2.65 | 3.03E-03 | transcription_start_site | - | 41087 | 41087 | -621  | 15000 | AN3210 |
| 375  | CONTIG53 | 41496 | 41920 | 2.65 | 3.03E-03 | transcription_start_site | - | 40546 | 40546 | -1162 | 15001 | AN3210 |
| 375  | CONTIG53 | 41496 | 41920 | 2.65 | 3.03E-03 | transcription_start_site | - | 40189 | 40189 | -1519 | 15002 | AN3210 |

|      |          |       |       |      |          |                          |   |       |       |       |       |        |
|------|----------|-------|-------|------|----------|--------------------------|---|-------|-------|-------|-------|--------|
| 375  | CONTIG53 | 41496 | 41920 | 2.65 | 3.03E-03 | transcription_start_site | - | 39993 | 39993 | -1715 | 15003 | AN3210 |
| 375  | CONTIG53 | 41496 | 41920 | 2.65 | 3.03E-03 | transcription_start_site | - | 39846 | 39846 | -1862 | 15004 | AN3210 |
| 375  | CONTIG53 | 41496 | 41920 | 2.65 | 3.03E-03 | transcription_start_site | - | 39518 | 39518 | -2190 | 15005 | AN3210 |
| 375  | CONTIG53 | 41496 | 41920 | 2.65 | 3.03E-03 | transcription_start_site | - | 39123 | 39123 | -2585 | 15006 | AN3210 |
| 1497 | CONTIG53 | 44851 | 45740 | 1.59 | 7.25E-02 | transcription_start_site | - | 41087 | 41087 | -4208 | 15000 | AN3210 |
| 1497 | CONTIG53 | 44851 | 45740 | 1.59 | 7.25E-02 | transcription_start_site | - | 40546 | 40546 | -4749 | 15001 | AN3210 |
| 1497 | CONTIG53 | 44851 | 45740 | 1.59 | 7.25E-02 | transcription_start_site | - | 40189 | 40189 | -5106 | 15002 | AN3210 |
| 1497 | CONTIG53 | 44851 | 45740 | 1.59 | 7.25E-02 | transcription_start_site | - | 39993 | 39993 | -5302 | 15003 | AN3210 |
| 1499 | CONTIG53 | 44251 | 44535 | 1.59 | 9.24E-02 | transcription_start_site | - | 41087 | 41087 | -3306 | 15000 | AN3210 |
| 1499 | CONTIG53 | 44251 | 44535 | 1.59 | 9.24E-02 | transcription_start_site | - | 40546 | 40546 | -3847 | 15001 | AN3210 |
| 1499 | CONTIG53 | 44251 | 44535 | 1.59 | 9.24E-02 | transcription_start_site | - | 40189 | 40189 | -4204 | 15002 | AN3210 |
| 1499 | CONTIG53 | 44251 | 44535 | 1.59 | 9.24E-02 | transcription_start_site | - | 39993 | 39993 | -4400 | 15003 | AN3210 |
| 1499 | CONTIG53 | 44251 | 44535 | 1.59 | 9.24E-02 | transcription_start_site | - | 39846 | 39846 | -4547 | 15004 | AN3210 |
| 1499 | CONTIG53 | 44251 | 44535 | 1.59 | 9.24E-02 | transcription_start_site | - | 39518 | 39518 | -4875 | 15005 | AN3210 |
| 830  | CONTIG53 | 47851 | 49045 | 2.07 | 1.06E-02 | transcription_start_site | - | 45748 | 45748 | -2700 | 15007 | AN3211 |
| 830  | CONTIG53 | 47851 | 49045 | 2.07 | 1.06E-02 | transcription_start_site | - | 45458 | 45458 | -2990 | 15008 | AN3211 |
| 1497 | CONTIG53 | 44851 | 45740 | 1.59 | 7.25E-02 | transcription_start_site | - | 45458 | 45458 | 162   | 15008 | AN3211 |
| 1497 | CONTIG53 | 44851 | 45740 | 1.59 | 7.25E-02 | transcription_start_site | - | 45748 | 45748 | 452   | 15007 | AN3211 |
| 1499 | CONTIG53 | 44251 | 44535 | 1.59 | 9.24E-02 | transcription_start_site | - | 45458 | 45458 | 1065  | 15008 | AN3211 |
| 830  | CONTIG53 | 47851 | 49045 | 2.07 | 1.06E-02 | transcription_start_site | - | 47148 | 47148 | -1300 | 15009 | AN3212 |
| 830  | CONTIG53 | 47851 | 49045 | 2.07 | 1.06E-02 | transcription_start_site | - | 46860 | 46860 | -1588 | 15010 | AN3212 |
| 830  | CONTIG53 | 47851 | 49045 | 2.07 | 1.06E-02 | transcription_start_site | - | 48869 | 48869 | 421   | 15011 | AN3213 |
| 35   | CONTIG54 | 7806  | 8095  | 3.51 | 0.00E+00 | transcription_start_site | - | 7670  | 7670  | -280  | 15012 | AN3214 |
| 35   | CONTIG54 | 7806  | 8095  | 3.51 | 0.00E+00 | transcription_start_site | - | 7105  | 7105  | -845  | 15013 | AN3214 |
| 35   | CONTIG54 | 7806  | 8095  | 3.51 | 0.00E+00 | transcription_start_site | - | 6797  | 6797  | -1153 | 15014 | AN3214 |
| 35   | CONTIG54 | 7806  | 8095  | 3.51 | 0.00E+00 | transcription_start_site | - | 6359  | 6359  | -1591 | 15015 | AN3214 |
| 35   | CONTIG54 | 7806  | 8095  | 3.51 | 0.00E+00 | transcription_start_site | - | 5329  | 5329  | -2621 | 15016 | AN3214 |
| 35   | CONTIG54 | 7806  | 8095  | 3.51 | 0.00E+00 | transcription_start_site | - | 5039  | 5039  | -2911 | 15017 | AN3214 |
| 35   | CONTIG54 | 7806  | 8095  | 3.51 | 0.00E+00 | transcription_start_site | - | 4877  | 4877  | -3073 | 15018 | AN3214 |
| 94   | CONTIG54 | 12161 | 12740 | 3.24 | 0.00E+00 | transcription_start_site | - | 7670  | 7670  | -4780 | 15012 | AN3214 |
| 1697 | CONTIG54 | 11196 | 11825 | 1.5  | 5.88E-02 | transcription_start_site | - | 7670  | 7670  | -3840 | 15012 | AN3214 |
| 1697 | CONTIG54 | 11196 | 11825 | 1.5  | 5.88E-02 | transcription_start_site | - | 7105  | 7105  | -4405 | 15013 | AN3214 |
| 1697 | CONTIG54 | 11196 | 11825 | 1.5  | 5.88E-02 | transcription_start_site | - | 6797  | 6797  | -4713 | 15014 | AN3214 |
| 1697 | CONTIG54 | 11196 | 11825 | 1.5  | 5.88E-02 | transcription_start_site | - | 6359  | 6359  | -5151 | 15015 | AN3214 |
| 94   | CONTIG54 | 12161 | 12740 | 3.24 | 0.00E+00 | transcription_start_site | - | 9993  | 9993  | -2457 | 15019 | AN3215 |
| 94   | CONTIG54 | 12161 | 12740 | 3.24 | 0.00E+00 | transcription_start_site | - | 9841  | 9841  | -2609 | 15020 | AN3215 |
| 94   | CONTIG54 | 12161 | 12740 | 3.24 | 0.00E+00 | transcription_start_site | - | 9724  | 9724  | -2726 | 15021 | AN3215 |
| 1697 | CONTIG54 | 11196 | 11825 | 1.5  | 5.88E-02 | transcription_start_site | - | 9993  | 9993  | -1517 | 15019 | AN3215 |
| 1697 | CONTIG54 | 11196 | 11825 | 1.5  | 5.88E-02 | transcription_start_site | - | 9841  | 9841  | -1669 | 15020 | AN3215 |
| 1697 | CONTIG54 | 11196 | 11825 | 1.5  | 5.88E-02 | transcription_start_site | - | 9724  | 9724  | -1786 | 15021 | AN3215 |
| 35   | CONTIG54 | 7806  | 8095  | 3.51 | 0.00E+00 | transcription_start_site | + | 11190 | 11190 | -3239 | 15022 | AN3216 |
| 35   | CONTIG54 | 7806  | 8095  | 3.51 | 0.00E+00 | transcription_start_site | + | 12083 | 12083 | -4132 | 15023 | AN3216 |
| 35   | CONTIG54 | 7806  | 8095  | 3.51 | 0.00E+00 | transcription_start_site | + | 12528 | 12528 | -4577 | 15024 | AN3216 |
| 35   | CONTIG54 | 7806  | 8095  | 3.51 | 0.00E+00 | transcription_start_site | + | 12803 | 12803 | -4852 | 15025 | AN3216 |
| 94   | CONTIG54 | 12161 | 12740 | 3.24 | 0.00E+00 | transcription_start_site | + | 12528 | 12528 | -77   | 15024 | AN3216 |
| 94   | CONTIG54 | 12161 | 12740 | 3.24 | 0.00E+00 | transcription_start_site | + | 12803 | 12803 | -352  | 15025 | AN3216 |
| 94   | CONTIG54 | 12161 | 12740 | 3.24 | 0.00E+00 | transcription_start_site | + | 12083 | 12083 | 367   | 15023 | AN3216 |
| 94   | CONTIG54 | 12161 | 12740 | 3.24 | 0.00E+00 | transcription_start_site | + | 13262 | 13262 | -811  | 15026 | AN3216 |
| 94   | CONTIG54 | 12161 | 12740 | 3.24 | 0.00E+00 | transcription_start_site | + | 11190 | 11190 | 1260  | 15022 | AN3216 |
| 94   | CONTIG54 | 12161 | 12740 | 3.24 | 0.00E+00 | transcription_start_site | + | 13971 | 13971 | -1520 | 15027 | AN3216 |
| 94   | CONTIG54 | 12161 | 12740 | 3.24 | 0.00E+00 | transcription_start_site | + | 14144 | 14144 | -1693 | 15028 | AN3216 |
| 1697 | CONTIG54 | 11196 | 11825 | 1.5  | 5.88E-02 | transcription_start_site | + | 11190 | 11190 | 320   | 15022 | AN3216 |
| 1697 | CONTIG54 | 11196 | 11825 | 1.5  | 5.88E-02 | transcription_start_site | + | 12083 | 12083 | -572  | 15023 | AN3216 |
| 1697 | CONTIG54 | 11196 | 11825 | 1.5  | 5.88E-02 | transcription_start_site | + | 12528 | 12528 | -1017 | 15024 | AN3216 |
| 1697 | CONTIG54 | 11196 | 11825 | 1.5  | 5.88E-02 | transcription_start_site | + | 12803 | 12803 | -1292 | 15025 | AN3216 |
| 1697 | CONTIG54 | 11196 | 11825 | 1.5  | 5.88E-02 | transcription_start_site | + | 13262 | 13262 | -1751 | 15026 | AN3216 |
| 1697 | CONTIG54 | 11196 | 11825 | 1.5  | 5.88E-02 | transcription_start_site | + | 13971 | 13971 | -2460 | 15027 | AN3216 |

|               |       |       |      |          |                          |   |       |       |       |       |        |
|---------------|-------|-------|------|----------|--------------------------|---|-------|-------|-------|-------|--------|
| 1697 CONTIG54 | 11196 | 11825 | 1.5  | 5.88E-02 | transcription_start_site | + | 14144 | 14144 | -2633 | 15028 | AN3216 |
| 94 CONTIG54   | 12161 | 12740 | 3.24 | 0.00E+00 | transcription_start_site | + | 15427 | 15427 | -2976 | 15029 | AN3217 |
| 94 CONTIG54   | 12161 | 12740 | 3.24 | 0.00E+00 | transcription_start_site | + | 16342 | 16342 | -3891 | 15030 | AN3217 |
| 94 CONTIG54   | 12161 | 12740 | 3.24 | 0.00E+00 | transcription_start_site | + | 16558 | 16558 | -4107 | 15031 | AN3217 |
| 94 CONTIG54   | 12161 | 12740 | 3.24 | 0.00E+00 | transcription_start_site | + | 16904 | 16904 | -4453 | 15032 | AN3217 |
| 94 CONTIG54   | 12161 | 12740 | 3.24 | 0.00E+00 | transcription_start_site | + | 17166 | 17166 | -4715 | 15033 | AN3217 |
| 1697 CONTIG54 | 11196 | 11825 | 1.5  | 5.88E-02 | transcription_start_site | + | 15427 | 15427 | -3916 | 15029 | AN3217 |
| 1697 CONTIG54 | 11196 | 11825 | 1.5  | 5.88E-02 | transcription_start_site | + | 16342 | 16342 | -4831 | 15030 | AN3217 |
| 1697 CONTIG54 | 11196 | 11825 | 1.5  | 5.88E-02 | transcription_start_site | + | 16558 | 16558 | -5047 | 15031 | AN3217 |
| 663 CONTIG54  | 28127 | 28482 | 2.23 | 3.61E-03 | transcription_start_site | - | 25029 | 25029 | -3275 | 15039 | AN3220 |
| 663 CONTIG54  | 28127 | 28482 | 2.23 | 3.61E-03 | transcription_start_site | - | 24486 | 24486 | -3818 | 15040 | AN3220 |
| 663 CONTIG54  | 28127 | 28482 | 2.23 | 3.61E-03 | transcription_start_site | - | 24287 | 24287 | -4017 | 15041 | AN3220 |
| 663 CONTIG54  | 28127 | 28482 | 2.23 | 3.61E-03 | transcription_start_site | - | 23895 | 23895 | -4409 | 15042 | AN3220 |
| 1698 CONTIG54 | 25437 | 25779 | 1.5  | 5.88E-02 | transcription_start_site | - | 25029 | 25029 | -579  | 15039 | AN3220 |
| 1698 CONTIG54 | 25437 | 25779 | 1.5  | 5.88E-02 | transcription_start_site | - | 24486 | 24486 | -1122 | 15040 | AN3220 |
| 1698 CONTIG54 | 25437 | 25779 | 1.5  | 5.88E-02 | transcription_start_site | - | 24287 | 24287 | -1321 | 15041 | AN3220 |
| 1698 CONTIG54 | 25437 | 25779 | 1.5  | 5.88E-02 | transcription_start_site | - | 23895 | 23895 | -1713 | 15042 | AN3220 |
| 2007 CONTIG54 | 26032 | 26911 | 1.37 | 9.24E-02 | transcription_start_site | - | 25029 | 25029 | -1442 | 15039 | AN3220 |
| 2007 CONTIG54 | 26032 | 26911 | 1.37 | 9.24E-02 | transcription_start_site | - | 24486 | 24486 | -1985 | 15040 | AN3220 |
| 2007 CONTIG54 | 26032 | 26911 | 1.37 | 9.24E-02 | transcription_start_site | - | 24287 | 24287 | -2184 | 15041 | AN3220 |
| 2007 CONTIG54 | 26032 | 26911 | 1.37 | 9.24E-02 | transcription_start_site | - | 23895 | 23895 | -2576 | 15042 | AN3220 |
| 2547 CONTIG54 | 28667 | 29241 | 1.19 | 1.66E-01 | transcription_start_site | - | 25029 | 25029 | -3925 | 15039 | AN3220 |
| 2547 CONTIG54 | 28667 | 29241 | 1.19 | 1.66E-01 | transcription_start_site | - | 24486 | 24486 | -4468 | 15040 | AN3220 |
| 2547 CONTIG54 | 28667 | 29241 | 1.19 | 1.66E-01 | transcription_start_site | - | 24287 | 24287 | -4667 | 15041 | AN3220 |
| 2547 CONTIG54 | 28667 | 29241 | 1.19 | 1.66E-01 | transcription_start_site | - | 23895 | 23895 | -5059 | 15042 | AN3220 |
| 663 CONTIG54  | 28127 | 28482 | 2.23 | 3.61E-03 | transcription_start_site | - | 27712 | 27712 | -592  | 15043 | AN3221 |
| 663 CONTIG54  | 28127 | 28482 | 2.23 | 3.61E-03 | transcription_start_site | - | 27415 | 27415 | -889  | 15044 | AN3221 |
| 663 CONTIG54  | 28127 | 28482 | 2.23 | 3.61E-03 | transcription_start_site | - | 27163 | 27163 | -1141 | 15045 | AN3221 |
| 663 CONTIG54  | 28127 | 28482 | 2.23 | 3.61E-03 | transcription_start_site | - | 26720 | 26720 | -1584 | 15046 | AN3221 |
| 1578 CONTIG54 | 30312 | 30591 | 1.55 | 5.22E-02 | transcription_start_site | - | 27712 | 27712 | -2739 | 15043 | AN3221 |
| 1578 CONTIG54 | 30312 | 30591 | 1.55 | 5.22E-02 | transcription_start_site | - | 27415 | 27415 | -3036 | 15044 | AN3221 |
| 1578 CONTIG54 | 30312 | 30591 | 1.55 | 5.22E-02 | transcription_start_site | - | 27163 | 27163 | -3288 | 15045 | AN3221 |
| 1578 CONTIG54 | 30312 | 30591 | 1.55 | 5.22E-02 | transcription_start_site | - | 26720 | 26720 | -3731 | 15046 | AN3221 |
| 1698 CONTIG54 | 25437 | 25779 | 1.5  | 5.88E-02 | transcription_start_site | - | 26720 | 26720 | 1112  | 15046 | AN3221 |
| 2007 CONTIG54 | 26032 | 26911 | 1.37 | 9.24E-02 | transcription_start_site | - | 26720 | 26720 | 248   | 15046 | AN3221 |
| 2007 CONTIG54 | 26032 | 26911 | 1.37 | 9.24E-02 | transcription_start_site | - | 27163 | 27163 | 691   | 15045 | AN3221 |
| 2007 CONTIG54 | 26032 | 26911 | 1.37 | 9.24E-02 | transcription_start_site | - | 27415 | 27415 | 943   | 15044 | AN3221 |
| 2007 CONTIG54 | 26032 | 26911 | 1.37 | 9.24E-02 | transcription_start_site | - | 27712 | 27712 | 1240  | 15043 | AN3221 |
| 2547 CONTIG54 | 28667 | 29241 | 1.19 | 1.66E-01 | transcription_start_site | - | 27712 | 27712 | -1242 | 15043 | AN3221 |
| 2547 CONTIG54 | 28667 | 29241 | 1.19 | 1.66E-01 | transcription_start_site | - | 27415 | 27415 | -1539 | 15044 | AN3221 |
| 2547 CONTIG54 | 28667 | 29241 | 1.19 | 1.66E-01 | transcription_start_site | - | 27163 | 27163 | -1791 | 15045 | AN3221 |
| 2547 CONTIG54 | 28667 | 29241 | 1.19 | 1.66E-01 | transcription_start_site | - | 26720 | 26720 | -2234 | 15046 | AN3221 |
| 663 CONTIG54  | 28127 | 28482 | 2.23 | 3.61E-03 | transcription_start_site | + | 30738 | 30738 | -2433 | 15047 | AN3222 |
| 663 CONTIG54  | 28127 | 28482 | 2.23 | 3.61E-03 | transcription_start_site | + | 30826 | 30826 | -2521 | 15048 | AN3222 |
| 663 CONTIG54  | 28127 | 28482 | 2.23 | 3.61E-03 | transcription_start_site | + | 31045 | 31045 | -2740 | 15049 | AN3222 |
| 663 CONTIG54  | 28127 | 28482 | 2.23 | 3.61E-03 | transcription_start_site | + | 31247 | 31247 | -2942 | 15050 | AN3222 |
| 663 CONTIG54  | 28127 | 28482 | 2.23 | 3.61E-03 | transcription_start_site | + | 32346 | 32346 | -4041 | 15051 | AN3222 |
| 1578 CONTIG54 | 30312 | 30591 | 1.55 | 5.22E-02 | transcription_start_site | + | 30738 | 30738 | -286  | 15047 | AN3222 |
| 1578 CONTIG54 | 30312 | 30591 | 1.55 | 5.22E-02 | transcription_start_site | + | 30826 | 30826 | -374  | 15048 | AN3222 |
| 1578 CONTIG54 | 30312 | 30591 | 1.55 | 5.22E-02 | transcription_start_site | + | 31045 | 31045 | -593  | 15049 | AN3222 |
| 1578 CONTIG54 | 30312 | 30591 | 1.55 | 5.22E-02 | transcription_start_site | + | 31247 | 31247 | -795  | 15050 | AN3222 |
| 1578 CONTIG54 | 30312 | 30591 | 1.55 | 5.22E-02 | transcription_start_site | + | 32346 | 32346 | -1894 | 15051 | AN3222 |
| 1698 CONTIG54 | 25437 | 25779 | 1.5  | 5.88E-02 | transcription_start_site | + | 30738 | 30738 | -5130 | 15047 | AN3222 |
| 2007 CONTIG54 | 26032 | 26911 | 1.37 | 9.24E-02 | transcription_start_site | + | 30738 | 30738 | -4266 | 15047 | AN3222 |
| 2007 CONTIG54 | 26032 | 26911 | 1.37 | 9.24E-02 | transcription_start_site | + | 30826 | 30826 | -4354 | 15048 | AN3222 |
| 2007 CONTIG54 | 26032 | 26911 | 1.37 | 9.24E-02 | transcription_start_site | + | 31045 | 31045 | -4573 | 15049 | AN3222 |
| 2007 CONTIG54 | 26032 | 26911 | 1.37 | 9.24E-02 | transcription_start_site | + | 31247 | 31247 | -4775 | 15050 | AN3222 |



|      |          |        |        |      |          |                          |   |        |        |       |       |        |
|------|----------|--------|--------|------|----------|--------------------------|---|--------|--------|-------|-------|--------|
| 2547 | CONTIG54 | 28667  | 29241  | 1.19 | 1.66E-01 | transcription_start_site | + | 30738  | 30738  | -1784 | 15047 | AN3222 |
| 2547 | CONTIG54 | 28667  | 29241  | 1.19 | 1.66E-01 | transcription_start_site | + | 30826  | 30826  | -1872 | 15048 | AN3222 |
| 2547 | CONTIG54 | 28667  | 29241  | 1.19 | 1.66E-01 | transcription_start_site | + | 31045  | 31045  | -2091 | 15049 | AN3222 |
| 2547 | CONTIG54 | 28667  | 29241  | 1.19 | 1.66E-01 | transcription_start_site | + | 31247  | 31247  | -2293 | 15050 | AN3222 |
| 2547 | CONTIG54 | 28667  | 29241  | 1.19 | 1.66E-01 | transcription_start_site | + | 32346  | 32346  | -3392 | 15051 | AN3222 |
| 2008 | CONTIG54 | 35627  | 35925  | 1.37 | 9.24E-02 | transcription_start_site | - | 35541  | 35541  | -235  | 15052 | AN3223 |
| 2008 | CONTIG54 | 35627  | 35925  | 1.37 | 9.24E-02 | transcription_start_site | - | 34747  | 34747  | -1029 | 15053 | AN3223 |
| 2008 | CONTIG54 | 35627  | 35925  | 1.37 | 9.24E-02 | transcription_start_site | - | 34236  | 34236  | -1540 | 15054 | AN3223 |
| 2263 | CONTIG54 | 33677  | 33961  | 1.28 | 1.25E-01 | transcription_start_site | - | 34236  | 34236  | 417   | 15054 | AN3223 |
| 2263 | CONTIG54 | 33677  | 33961  | 1.28 | 1.25E-01 | transcription_start_site | - | 34747  | 34747  | 928   | 15053 | AN3223 |
| 2008 | CONTIG54 | 35627  | 35925  | 1.37 | 9.24E-02 | transcription_start_site | + | 36527  | 36527  | -751  | 15055 | AN3224 |
| 2008 | CONTIG54 | 35627  | 35925  | 1.37 | 9.24E-02 | transcription_start_site | + | 36854  | 36854  | -1078 | 15056 | AN3224 |
| 2008 | CONTIG54 | 35627  | 35925  | 1.37 | 9.24E-02 | transcription_start_site | + | 37284  | 37284  | -1508 | 15057 | AN3224 |
| 2263 | CONTIG54 | 33677  | 33961  | 1.28 | 1.25E-01 | transcription_start_site | + | 36527  | 36527  | -2708 | 15055 | AN3224 |
| 2263 | CONTIG54 | 33677  | 33961  | 1.28 | 1.25E-01 | transcription_start_site | + | 36854  | 36854  | -3035 | 15056 | AN3224 |
| 2263 | CONTIG54 | 33677  | 33961  | 1.28 | 1.25E-01 | transcription_start_site | + | 37284  | 37284  | -3465 | 15057 | AN3224 |
| 2537 | CONTIG54 | 44870  | 45654  | 1.19 | 1.59E-01 | transcription_start_site | - | 41893  | 41893  | -3369 | 15058 | AN3225 |
| 2537 | CONTIG54 | 44870  | 45654  | 1.19 | 1.59E-01 | transcription_start_site | - | 41144  | 41144  | -4118 | 15059 | AN3225 |
| 2537 | CONTIG54 | 44870  | 45654  | 1.19 | 1.59E-01 | transcription_start_site | - | 40856  | 40856  | -4406 | 15060 | AN3225 |
| 2537 | CONTIG54 | 44870  | 45654  | 1.19 | 1.59E-01 | transcription_start_site | - | 40337  | 40337  | -4925 | 15061 | AN3225 |
| 2537 | CONTIG54 | 44870  | 45654  | 1.19 | 1.59E-01 | transcription_start_site | - | 40176  | 40176  | -5086 | 15062 | AN3225 |
| 2671 | CONTIG54 | 43445  | 43794  | 1.14 | 1.93E-01 | transcription_start_site | - | 41893  | 41893  | -1726 | 15058 | AN3225 |
| 2671 | CONTIG54 | 43445  | 43794  | 1.14 | 1.93E-01 | transcription_start_site | - | 41144  | 41144  | -2475 | 15059 | AN3225 |
| 2671 | CONTIG54 | 43445  | 43794  | 1.14 | 1.93E-01 | transcription_start_site | - | 40856  | 40856  | -2763 | 15060 | AN3225 |
| 2671 | CONTIG54 | 43445  | 43794  | 1.14 | 1.93E-01 | transcription_start_site | - | 40337  | 40337  | -3282 | 15061 | AN3225 |
| 2671 | CONTIG54 | 43445  | 43794  | 1.14 | 1.93E-01 | transcription_start_site | - | 40176  | 40176  | -3443 | 15062 | AN3225 |
| 2537 | CONTIG54 | 44870  | 45654  | 1.19 | 1.59E-01 | transcription_start_site | - | 44038  | 44038  | -1224 | 15063 | AN3226 |
| 2537 | CONTIG54 | 44870  | 45654  | 1.19 | 1.59E-01 | transcription_start_site | - | 43891  | 43891  | -1371 | 15064 | AN3226 |
| 2671 | CONTIG54 | 43445  | 43794  | 1.14 | 1.93E-01 | transcription_start_site | - | 43891  | 43891  | 271   | 15064 | AN3226 |
| 2671 | CONTIG54 | 43445  | 43794  | 1.14 | 1.93E-01 | transcription_start_site | - | 44038  | 44038  | 418   | 15063 | AN3226 |
| 2537 | CONTIG54 | 44870  | 45654  | 1.19 | 1.59E-01 | transcription_start_site | - | 45468  | 45468  | 206   | 15066 | AN3227 |
| 2537 | CONTIG54 | 44870  | 45654  | 1.19 | 1.59E-01 | transcription_start_site | - | 46245  | 46245  | 983   | 15065 | AN3227 |
| 2672 | CONTIG54 | 80108  | 80382  | 1.14 | 1.93E-01 | transcription_start_site | - | 78107  | 78107  | -2138 | 15097 | AN3238 |
| 2672 | CONTIG54 | 80108  | 80382  | 1.14 | 1.93E-01 | transcription_start_site | - | 77957  | 77957  | -2288 | 15098 | AN3238 |
| 2672 | CONTIG54 | 80108  | 80382  | 1.14 | 1.93E-01 | transcription_start_site | - | 77149  | 77149  | -3096 | 15099 | AN3238 |
| 2672 | CONTIG54 | 80108  | 80382  | 1.14 | 1.93E-01 | transcription_start_site | + | 80343  | 80343  | -98   | 15101 | AN3239 |
| 2672 | CONTIG54 | 80108  | 80382  | 1.14 | 1.93E-01 | transcription_start_site | + | 79685  | 79685  | 560   | 15100 | AN3239 |
| 2672 | CONTIG54 | 80108  | 80382  | 1.14 | 1.93E-01 | transcription_start_site | + | 80903  | 80903  | -658  | 15102 | AN3239 |
| 256  | CONTIG54 | 99463  | 99732  | 2.83 | 2.67E-04 | transcription_start_site | - | 96999  | 96999  | -2598 | 15123 | AN3246 |
| 256  | CONTIG54 | 99463  | 99732  | 2.83 | 2.67E-04 | transcription_start_site | - | 96814  | 96814  | -2783 | 15124 | AN3246 |
| 256  | CONTIG54 | 99463  | 99732  | 2.83 | 2.67E-04 | transcription_start_site | + | 100366 | 100366 | -768  | 15125 | AN3247 |
| 256  | CONTIG54 | 99463  | 99732  | 2.83 | 2.67E-04 | transcription_start_site | + | 101243 | 101243 | -1645 | 15126 | AN3247 |
| 256  | CONTIG54 | 99463  | 99732  | 2.83 | 2.67E-04 | transcription_start_site | + | 101592 | 101592 | -1994 | 15127 | AN3247 |
| 256  | CONTIG54 | 99463  | 99732  | 2.83 | 2.67E-04 | transcription_start_site | + | 102334 | 102334 | -2736 | 15128 | AN3247 |
| 664  | CONTIG54 | 107268 | 107532 | 2.23 | 3.61E-03 | transcription_start_site | - | 107192 | 107192 | -208  | 15131 | AN3248 |
| 664  | CONTIG54 | 107268 | 107532 | 2.23 | 3.61E-03 | transcription_start_site | + | 107552 | 107552 | -152  | 15132 | AN3249 |
| 664  | CONTIG54 | 107268 | 107532 | 2.23 | 3.61E-03 | transcription_start_site | + | 107982 | 107982 | -582  | 15133 | AN3249 |
| 664  | CONTIG54 | 107268 | 107532 | 2.23 | 3.61E-03 | transcription_start_site | + | 108410 | 108410 | -1010 | 15134 | AN3249 |
| 664  | CONTIG54 | 107268 | 107532 | 2.23 | 3.61E-03 | transcription_start_site | + | 110421 | 110421 | -3021 | 15135 | AN3250 |
| 664  | CONTIG54 | 107268 | 107532 | 2.23 | 3.61E-03 | transcription_start_site | + | 110668 | 110668 | -3268 | 15136 | AN3250 |
| 664  | CONTIG54 | 107268 | 107532 | 2.23 | 3.61E-03 | transcription_start_site | + | 110754 | 110754 | -3354 | 15137 | AN3250 |
| 664  | CONTIG54 | 107268 | 107532 | 2.23 | 3.61E-03 | transcription_start_site | + | 111168 | 111168 | -3768 | 15138 | AN3250 |
| 1579 | CONTIG54 | 113788 | 114052 | 1.55 | 5.22E-02 | transcription_start_site | - | 113769 | 113769 | -151  | 15139 | AN3251 |
| 1579 | CONTIG54 | 113788 | 114052 | 1.55 | 5.22E-02 | transcription_start_site | - | 113259 | 113259 | -661  | 15140 | AN3251 |
| 1579 | CONTIG54 | 113788 | 114052 | 1.55 | 5.22E-02 | transcription_start_site | - | 115042 | 115042 | 1122  | 15146 | AN3252 |
| 2416 | CONTIG54 | 141541 | 141881 | 1.23 | 1.44E-01 | transcription_start_site | - | 141703 | 141703 | -8    | 15174 | AN3260 |
| 2416 | CONTIG54 | 141541 | 141881 | 1.23 | 1.44E-01 | transcription_start_site | - | 142276 | 142276 | 565   | 15173 | AN3260 |

|      |          |        |        |      |          |                          |   |        |        |       |       |        |
|------|----------|--------|--------|------|----------|--------------------------|---|--------|--------|-------|-------|--------|
| 2416 | CONTIG54 | 141541 | 141881 | 1.23 | 1.44E-01 | transcription_start_site | + | 143385 | 143385 | -1674 | 15175 | AN3261 |
| 2416 | CONTIG54 | 141541 | 141881 | 1.23 | 1.44E-01 | transcription_start_site | + | 143504 | 143504 | -1793 | 15176 | AN3261 |
| 2416 | CONTIG54 | 141541 | 141881 | 1.23 | 1.44E-01 | transcription_start_site | + | 143919 | 143919 | -2208 | 15177 | AN3261 |
| 2416 | CONTIG54 | 141541 | 141881 | 1.23 | 1.44E-01 | transcription_start_site | + | 144233 | 144233 | -2522 | 15178 | AN3261 |
| 2416 | CONTIG54 | 141541 | 141881 | 1.23 | 1.44E-01 | transcription_start_site | + | 144460 | 144460 | -2749 | 15179 | AN3261 |
| 2416 | CONTIG54 | 141541 | 141881 | 1.23 | 1.44E-01 | transcription_start_site | + | 144666 | 144666 | -2955 | 15180 | AN3261 |
| 2416 | CONTIG54 | 141541 | 141881 | 1.23 | 1.44E-01 | transcription_start_site | + | 145170 | 145170 | -3459 | 15181 | AN3261 |
| 2416 | CONTIG54 | 141541 | 141881 | 1.23 | 1.44E-01 | transcription_start_site | + | 145281 | 145281 | -3570 | 15182 | AN3261 |
| 2416 | CONTIG54 | 141541 | 141881 | 1.23 | 1.44E-01 | transcription_start_site | + | 145573 | 145573 | -3862 | 15183 | AN3261 |
| 2548 | CONTIG54 | 150471 | 150740 | 1.19 | 1.66E-01 | transcription_start_site | - | 150211 | 150211 | -394  | 15184 | AN3262 |
| 2548 | CONTIG54 | 150471 | 150740 | 1.19 | 1.66E-01 | transcription_start_site | - | 149899 | 149899 | -706  | 15185 | AN3262 |
| 2548 | CONTIG54 | 150471 | 150740 | 1.19 | 1.66E-01 | transcription_start_site | - | 149778 | 149778 | -827  | 15186 | AN3262 |
| 2548 | CONTIG54 | 150471 | 150740 | 1.19 | 1.66E-01 | transcription_start_site | - | 149646 | 149646 | -959  | 15187 | AN3262 |
| 2548 | CONTIG54 | 150471 | 150740 | 1.19 | 1.66E-01 | transcription_start_site | - | 149568 | 149568 | -1037 | 15188 | AN3262 |
| 2548 | CONTIG54 | 150471 | 150740 | 1.19 | 1.66E-01 | transcription_start_site | - | 149287 | 149287 | -1318 | 15189 | AN3262 |
| 2548 | CONTIG54 | 150471 | 150740 | 1.19 | 1.66E-01 | transcription_start_site | - | 149070 | 149070 | -1535 | 15190 | AN3262 |
| 2548 | CONTIG54 | 150471 | 150740 | 1.19 | 1.66E-01 | transcription_start_site | - | 148547 | 148547 | -2058 | 15191 | AN3262 |
| 2548 | CONTIG54 | 150471 | 150740 | 1.19 | 1.66E-01 | transcription_start_site | - | 151535 | 151535 | 929   | 15192 | AN3263 |
| 2264 | CONTIG54 | 157516 | 157775 | 1.28 | 1.25E-01 | transcription_start_site | - | 154794 | 154794 | -2851 | 15193 | AN3264 |
| 2264 | CONTIG54 | 157516 | 157775 | 1.28 | 1.25E-01 | transcription_start_site | - | 154517 | 154517 | -3128 | 15194 | AN3264 |
| 2264 | CONTIG54 | 157516 | 157775 | 1.28 | 1.25E-01 | transcription_start_site | - | 154070 | 154070 | -3575 | 15195 | AN3264 |
| 2264 | CONTIG54 | 157516 | 157775 | 1.28 | 1.25E-01 | transcription_start_site | - | 156719 | 156719 | -926  | 15196 | AN3265 |
| 2264 | CONTIG54 | 157516 | 157775 | 1.28 | 1.25E-01 | transcription_start_site | - | 156602 | 156602 | -1043 | 15197 | AN3265 |
| 2264 | CONTIG54 | 157516 | 157775 | 1.28 | 1.25E-01 | transcription_start_site | - | 156425 | 156425 | -1220 | 15198 | AN3265 |
| 2264 | CONTIG54 | 157516 | 157775 | 1.28 | 1.25E-01 | transcription_start_site | - | 156059 | 156059 | -1586 | 15199 | AN3265 |
| 2264 | CONTIG54 | 157516 | 157775 | 1.28 | 1.25E-01 | transcription_start_site | - | 155599 | 155599 | -2046 | 15200 | AN3265 |
| 2264 | CONTIG54 | 157516 | 157775 | 1.28 | 1.25E-01 | transcription_start_site | + | 160241 | 160241 | -2595 | 15201 | AN3267 |
| 2264 | CONTIG54 | 157516 | 157775 | 1.28 | 1.25E-01 | transcription_start_site | + | 160835 | 160835 | -3189 | 15202 | AN3267 |
| 2264 | CONTIG54 | 157516 | 157775 | 1.28 | 1.25E-01 | transcription_start_site | + | 161509 | 161509 | -3863 | 15203 | AN3267 |
| 2264 | CONTIG54 | 157516 | 157775 | 1.28 | 1.25E-01 | transcription_start_site | + | 161571 | 161571 | -3925 | 15204 | AN3267 |
| 887  | CONTIG54 | 171981 | 172256 | 2.01 | 8.81E-03 | transcription_start_site | - | 171959 | 171959 | -159  | 15205 | AN3269 |
| 887  | CONTIG54 | 171981 | 172256 | 2.01 | 8.81E-03 | transcription_start_site | - | 171797 | 171797 | -321  | 15206 | AN3269 |
| 887  | CONTIG54 | 171981 | 172256 | 2.01 | 8.81E-03 | transcription_start_site | - | 170877 | 170877 | -1241 | 15207 | AN3269 |
| 887  | CONTIG54 | 171981 | 172256 | 2.01 | 8.81E-03 | transcription_start_site | - | 170431 | 170431 | -1687 | 15208 | AN3269 |
| 2417 | CONTIG54 | 171301 | 171880 | 1.23 | 1.44E-01 | transcription_start_site | - | 171797 | 171797 | 206   | 15206 | AN3269 |
| 2417 | CONTIG54 | 171301 | 171880 | 1.23 | 1.44E-01 | transcription_start_site | - | 171959 | 171959 | 368   | 15205 | AN3269 |
| 2417 | CONTIG54 | 171301 | 171880 | 1.23 | 1.44E-01 | transcription_start_site | - | 170877 | 170877 | -713  | 15207 | AN3269 |
| 2417 | CONTIG54 | 171301 | 171880 | 1.23 | 1.44E-01 | transcription_start_site | - | 170431 | 170431 | -1159 | 15208 | AN3269 |
| 887  | CONTIG54 | 171981 | 172256 | 2.01 | 8.81E-03 | transcription_start_site | + | 172382 | 172382 | -263  | 15209 | AN3270 |
| 887  | CONTIG54 | 171981 | 172256 | 2.01 | 8.81E-03 | transcription_start_site | + | 172789 | 172789 | -670  | 15210 | AN3270 |
| 2417 | CONTIG54 | 171301 | 171880 | 1.23 | 1.44E-01 | transcription_start_site | + | 172382 | 172382 | -791  | 15209 | AN3270 |
| 2417 | CONTIG54 | 171301 | 171880 | 1.23 | 1.44E-01 | transcription_start_site | + | 172789 | 172789 | -1198 | 15210 | AN3270 |
| 887  | CONTIG54 | 171981 | 172256 | 2.01 | 8.81E-03 | transcription_start_site | + | 174919 | 174919 | -2800 | 15211 | AN3271 |
| 887  | CONTIG54 | 171981 | 172256 | 2.01 | 8.81E-03 | transcription_start_site | + | 174992 | 174992 | -2873 | 15212 | AN3271 |
| 887  | CONTIG54 | 171981 | 172256 | 2.01 | 8.81E-03 | transcription_start_site | + | 175168 | 175168 | -3049 | 15213 | AN3271 |
| 887  | CONTIG54 | 171981 | 172256 | 2.01 | 8.81E-03 | transcription_start_site | + | 176403 | 176403 | -4284 | 15214 | AN3271 |
| 2417 | CONTIG54 | 171301 | 171880 | 1.23 | 1.44E-01 | transcription_start_site | + | 174919 | 174919 | -3328 | 15211 | AN3271 |
| 2417 | CONTIG54 | 171301 | 171880 | 1.23 | 1.44E-01 | transcription_start_site | + | 174992 | 174992 | -3401 | 15212 | AN3271 |
| 2417 | CONTIG54 | 171301 | 171880 | 1.23 | 1.44E-01 | transcription_start_site | + | 175168 | 175168 | -3577 | 15213 | AN3271 |
| 2417 | CONTIG54 | 171301 | 171880 | 1.23 | 1.44E-01 | transcription_start_site | + | 176403 | 176403 | -4812 | 15214 | AN3271 |
| 175  | CONTIG55 | 8106   | 8395   | 2.99 | 0.00E+00 | transcription_start_site | + | 10440  | 10440  | -2189 | 15223 | AN3275 |
| 175  | CONTIG55 | 8106   | 8395   | 2.99 | 0.00E+00 | transcription_start_site | + | 10684  | 10684  | -2433 | 15224 | AN3275 |
| 175  | CONTIG55 | 8106   | 8395   | 2.99 | 0.00E+00 | transcription_start_site | + | 10824  | 10824  | -2573 | 15225 | AN3275 |
| 175  | CONTIG55 | 8106   | 8395   | 2.99 | 0.00E+00 | transcription_start_site | + | 11260  | 11260  | -3009 | 15226 | AN3275 |
| 175  | CONTIG55 | 8106   | 8395   | 2.99 | 0.00E+00 | transcription_start_site | + | 11532  | 11532  | -3281 | 15227 | AN3275 |
| 175  | CONTIG55 | 8106   | 8395   | 2.99 | 0.00E+00 | transcription_start_site | + | 11707  | 11707  | -3456 | 15228 | AN3275 |
| 175  | CONTIG55 | 8106   | 8395   | 2.99 | 0.00E+00 | transcription_start_site | + | 12070  | 12070  | -3819 | 15229 | AN3275 |

|      |          |       |       |      |          |                          |   |       |       |       |       |        |
|------|----------|-------|-------|------|----------|--------------------------|---|-------|-------|-------|-------|--------|
| 175  | CONTIG55 | 8106  | 8395  | 2.99 | 0.00E+00 | transcription_start_site | + | 12296 | 12296 | -4045 | 15230 | AN3275 |
| 1910 | CONTIG55 | 8862  | 9506  | 1.4  | 3.08E-02 | transcription_start_site | + | 10440 | 10440 | -1256 | 15223 | AN3275 |
| 1910 | CONTIG55 | 8862  | 9506  | 1.4  | 3.08E-02 | transcription_start_site | + | 10684 | 10684 | -1500 | 15224 | AN3275 |
| 1910 | CONTIG55 | 8862  | 9506  | 1.4  | 3.08E-02 | transcription_start_site | + | 10824 | 10824 | -1640 | 15225 | AN3275 |
| 1910 | CONTIG55 | 8862  | 9506  | 1.4  | 3.08E-02 | transcription_start_site | + | 11260 | 11260 | -2076 | 15226 | AN3275 |
| 1910 | CONTIG55 | 8862  | 9506  | 1.4  | 3.08E-02 | transcription_start_site | + | 11532 | 11532 | -2348 | 15227 | AN3275 |
| 1910 | CONTIG55 | 8862  | 9506  | 1.4  | 3.08E-02 | transcription_start_site | + | 11707 | 11707 | -2523 | 15228 | AN3275 |
| 1910 | CONTIG55 | 8862  | 9506  | 1.4  | 3.08E-02 | transcription_start_site | + | 12070 | 12070 | -2886 | 15229 | AN3275 |
| 1910 | CONTIG55 | 8862  | 9506  | 1.4  | 3.08E-02 | transcription_start_site | + | 12296 | 12296 | -3112 | 15230 | AN3275 |
| 2104 | CONTIG55 | 7201  | 7775  | 1.33 | 4.36E-02 | transcription_start_site | + | 10440 | 10440 | -2952 | 15223 | AN3275 |
| 2104 | CONTIG55 | 7201  | 7775  | 1.33 | 4.36E-02 | transcription_start_site | + | 10684 | 10684 | -3196 | 15224 | AN3275 |
| 2104 | CONTIG55 | 7201  | 7775  | 1.33 | 4.36E-02 | transcription_start_site | + | 10824 | 10824 | -3336 | 15225 | AN3275 |
| 2104 | CONTIG55 | 7201  | 7775  | 1.33 | 4.36E-02 | transcription_start_site | + | 11260 | 11260 | -3772 | 15226 | AN3275 |
| 2104 | CONTIG55 | 7201  | 7775  | 1.33 | 4.36E-02 | transcription_start_site | + | 11532 | 11532 | -4044 | 15227 | AN3275 |
| 2104 | CONTIG55 | 7201  | 7775  | 1.33 | 4.36E-02 | transcription_start_site | + | 11707 | 11707 | -4219 | 15228 | AN3275 |
| 2104 | CONTIG55 | 7201  | 7775  | 1.33 | 4.36E-02 | transcription_start_site | + | 12070 | 12070 | -4582 | 15229 | AN3275 |
| 2104 | CONTIG55 | 7201  | 7775  | 1.33 | 4.36E-02 | transcription_start_site | + | 12296 | 12296 | -4808 | 15230 | AN3275 |
| 1571 | CONTIG55 | 15978 | 17077 | 1.55 | 3.83E-03 | transcription_start_site | - | 13970 | 13970 | -2557 | 15231 | AN3276 |
| 1571 | CONTIG55 | 15978 | 17077 | 1.55 | 3.83E-03 | transcription_start_site | - | 13457 | 13457 | -3070 | 15232 | AN3276 |
| 1571 | CONTIG55 | 15978 | 17077 | 1.55 | 3.83E-03 | transcription_start_site | - | 13038 | 13038 | -3489 | 15233 | AN3276 |
| 2741 | CONTIG55 | 18094 | 18353 | 1.1  | 1.08E-01 | transcription_start_site | - | 13970 | 13970 | -4253 | 15231 | AN3276 |
| 2741 | CONTIG55 | 18094 | 18353 | 1.1  | 1.08E-01 | transcription_start_site | - | 13457 | 13457 | -4766 | 15232 | AN3276 |
| 1571 | CONTIG55 | 15978 | 17077 | 1.55 | 3.83E-03 | transcription_start_site | - | 15761 | 15761 | -766  | 15234 | AN3277 |
| 1571 | CONTIG55 | 15978 | 17077 | 1.55 | 3.83E-03 | transcription_start_site | - | 15413 | 15413 | -1114 | 15235 | AN3277 |
| 1571 | CONTIG55 | 15978 | 17077 | 1.55 | 3.83E-03 | transcription_start_site | - | 15287 | 15287 | -1240 | 15236 | AN3277 |
| 1571 | CONTIG55 | 15978 | 17077 | 1.55 | 3.83E-03 | transcription_start_site | - | 15008 | 15008 | -1519 | 15237 | AN3277 |
| 2035 | CONTIG55 | 19654 | 19928 | 1.36 | 3.70E-02 | transcription_start_site | - | 15761 | 15761 | -4030 | 15234 | AN3277 |
| 2035 | CONTIG55 | 19654 | 19928 | 1.36 | 3.70E-02 | transcription_start_site | - | 15413 | 15413 | -4378 | 15235 | AN3277 |
| 2035 | CONTIG55 | 19654 | 19928 | 1.36 | 3.70E-02 | transcription_start_site | - | 15287 | 15287 | -4504 | 15236 | AN3277 |
| 2035 | CONTIG55 | 19654 | 19928 | 1.36 | 3.70E-02 | transcription_start_site | - | 15008 | 15008 | -4783 | 15237 | AN3277 |
| 2741 | CONTIG55 | 18094 | 18353 | 1.1  | 1.08E-01 | transcription_start_site | - | 15761 | 15761 | -2462 | 15234 | AN3277 |
| 2741 | CONTIG55 | 18094 | 18353 | 1.1  | 1.08E-01 | transcription_start_site | - | 15413 | 15413 | -2810 | 15235 | AN3277 |
| 2741 | CONTIG55 | 18094 | 18353 | 1.1  | 1.08E-01 | transcription_start_site | - | 15287 | 15287 | -2936 | 15236 | AN3277 |
| 2741 | CONTIG55 | 18094 | 18353 | 1.1  | 1.08E-01 | transcription_start_site | - | 15008 | 15008 | -3215 | 15237 | AN3277 |
| 1571 | CONTIG55 | 15978 | 17077 | 1.55 | 3.83E-03 | transcription_start_site | + | 16550 | 16550 | -22   | 15239 | AN3278 |
| 1571 | CONTIG55 | 15978 | 17077 | 1.55 | 3.83E-03 | transcription_start_site | + | 16075 | 16075 | 452   | 15238 | AN3278 |
| 2035 | CONTIG55 | 19654 | 19928 | 1.36 | 3.70E-02 | transcription_start_site | - | 19265 | 19265 | -526  | 15240 | AN3279 |
| 2035 | CONTIG55 | 19654 | 19928 | 1.36 | 3.70E-02 | transcription_start_site | - | 18580 | 18580 | -1211 | 15241 | AN3279 |
| 2741 | CONTIG55 | 18094 | 18353 | 1.1  | 1.08E-01 | transcription_start_site | - | 18580 | 18580 | 356   | 15241 | AN3279 |
| 2741 | CONTIG55 | 18094 | 18353 | 1.1  | 1.08E-01 | transcription_start_site | - | 19265 | 19265 | 1041  | 15240 | AN3279 |
| 1571 | CONTIG55 | 15978 | 17077 | 1.55 | 3.83E-03 | transcription_start_site | + | 20165 | 20165 | -3637 | 15242 | AN3280 |
| 1571 | CONTIG55 | 15978 | 17077 | 1.55 | 3.83E-03 | transcription_start_site | + | 20264 | 20264 | -3736 | 15243 | AN3280 |
| 1571 | CONTIG55 | 15978 | 17077 | 1.55 | 3.83E-03 | transcription_start_site | + | 20363 | 20363 | -3835 | 15244 | AN3280 |
| 1571 | CONTIG55 | 15978 | 17077 | 1.55 | 3.83E-03 | transcription_start_site | + | 20903 | 20903 | -4375 | 15245 | AN3280 |
| 2035 | CONTIG55 | 19654 | 19928 | 1.36 | 3.70E-02 | transcription_start_site | + | 20165 | 20165 | -374  | 15242 | AN3280 |
| 2035 | CONTIG55 | 19654 | 19928 | 1.36 | 3.70E-02 | transcription_start_site | + | 20264 | 20264 | -473  | 15243 | AN3280 |
| 2035 | CONTIG55 | 19654 | 19928 | 1.36 | 3.70E-02 | transcription_start_site | + | 20363 | 20363 | -572  | 15244 | AN3280 |
| 2035 | CONTIG55 | 19654 | 19928 | 1.36 | 3.70E-02 | transcription_start_site | + | 20903 | 20903 | -1112 | 15245 | AN3280 |
| 2741 | CONTIG55 | 18094 | 18353 | 1.1  | 1.08E-01 | transcription_start_site | + | 20165 | 20165 | -1941 | 15242 | AN3280 |
| 2741 | CONTIG55 | 18094 | 18353 | 1.1  | 1.08E-01 | transcription_start_site | + | 20264 | 20264 | -2040 | 15243 | AN3280 |
| 2741 | CONTIG55 | 18094 | 18353 | 1.1  | 1.08E-01 | transcription_start_site | + | 20363 | 20363 | -2139 | 15244 | AN3280 |
| 2741 | CONTIG55 | 18094 | 18353 | 1.1  | 1.08E-01 | transcription_start_site | + | 20903 | 20903 | -2679 | 15245 | AN3280 |
| 1571 | CONTIG55 | 15978 | 17077 | 1.55 | 3.83E-03 | transcription_start_site | + | 22054 | 22054 | -5526 | 15246 | AN3281 |
| 2035 | CONTIG55 | 19654 | 19928 | 1.36 | 3.70E-02 | transcription_start_site | + | 22054 | 22054 | -2263 | 15246 | AN3281 |
| 2035 | CONTIG55 | 19654 | 19928 | 1.36 | 3.70E-02 | transcription_start_site | + | 22152 | 22152 | -2361 | 15247 | AN3281 |
| 2035 | CONTIG55 | 19654 | 19928 | 1.36 | 3.70E-02 | transcription_start_site | + | 22302 | 22302 | -2511 | 15248 | AN3281 |
| 2035 | CONTIG55 | 19654 | 19928 | 1.36 | 3.70E-02 | transcription_start_site | + | 22462 | 22462 | -2671 | 15249 | AN3281 |

|      |          |       |       |      |          |                          |   |       |       |       |       |        |
|------|----------|-------|-------|------|----------|--------------------------|---|-------|-------|-------|-------|--------|
| 2035 | CONTIG55 | 19654 | 19928 | 1.36 | 3.70E-02 | transcription_start_site | + | 22897 | 22897 | -3106 | 15250 | AN3281 |
| 2035 | CONTIG55 | 19654 | 19928 | 1.36 | 3.70E-02 | transcription_start_site | + | 23054 | 23054 | -3263 | 15251 | AN3281 |
| 2035 | CONTIG55 | 19654 | 19928 | 1.36 | 3.70E-02 | transcription_start_site | + | 23221 | 23221 | -3430 | 15252 | AN3281 |
| 2035 | CONTIG55 | 19654 | 19928 | 1.36 | 3.70E-02 | transcription_start_site | + | 23386 | 23386 | -3595 | 15253 | AN3281 |
| 2035 | CONTIG55 | 19654 | 19928 | 1.36 | 3.70E-02 | transcription_start_site | + | 23711 | 23711 | -3920 | 15254 | AN3281 |
| 2035 | CONTIG55 | 19654 | 19928 | 1.36 | 3.70E-02 | transcription_start_site | + | 23950 | 23950 | -4159 | 15255 | AN3281 |
| 2035 | CONTIG55 | 19654 | 19928 | 1.36 | 3.70E-02 | transcription_start_site | + | 24126 | 24126 | -4335 | 15256 | AN3281 |
| 2741 | CONTIG55 | 18094 | 18353 | 1.1  | 1.08E-01 | transcription_start_site | + | 22054 | 22054 | -3830 | 15246 | AN3281 |
| 2741 | CONTIG55 | 18094 | 18353 | 1.1  | 1.08E-01 | transcription_start_site | + | 22152 | 22152 | -3928 | 15247 | AN3281 |
| 2741 | CONTIG55 | 18094 | 18353 | 1.1  | 1.08E-01 | transcription_start_site | + | 22302 | 22302 | -4078 | 15248 | AN3281 |
| 2741 | CONTIG55 | 18094 | 18353 | 1.1  | 1.08E-01 | transcription_start_site | + | 22462 | 22462 | -4238 | 15249 | AN3281 |
| 2741 | CONTIG55 | 18094 | 18353 | 1.1  | 1.08E-01 | transcription_start_site | + | 22897 | 22897 | -4673 | 15250 | AN3281 |
| 2741 | CONTIG55 | 18094 | 18353 | 1.1  | 1.08E-01 | transcription_start_site | + | 23054 | 23054 | -4830 | 15251 | AN3281 |
| 2741 | CONTIG55 | 18094 | 18353 | 1.1  | 1.08E-01 | transcription_start_site | + | 23221 | 23221 | -4997 | 15252 | AN3281 |
| 1325 | CONTIG55 | 40515 | 40794 | 1.67 | 8.81E-03 | transcription_start_site | - | 40085 | 40085 | -569  | 15270 | AN3287 |
| 1325 | CONTIG55 | 40515 | 40794 | 1.67 | 8.81E-03 | transcription_start_site | - | 39492 | 39492 | -1162 | 15271 | AN3287 |
| 2972 | CONTIG55 | 54093 | 54437 | 0.95 | 1.93E-01 | transcription_start_site | - | 54368 | 54368 | 103   | 15276 | AN3290 |
| 2972 | CONTIG55 | 54093 | 54437 | 0.95 | 1.93E-01 | transcription_start_site | - | 54549 | 54549 | 284   | 15275 | AN3290 |
| 2972 | CONTIG55 | 54093 | 54437 | 0.95 | 1.93E-01 | transcription_start_site | - | 53935 | 53935 | -330  | 15277 | AN3290 |
| 2972 | CONTIG55 | 54093 | 54437 | 0.95 | 1.93E-01 | transcription_start_site | - | 54665 | 54665 | 400   | 15274 | AN3290 |
| 2972 | CONTIG55 | 54093 | 54437 | 0.95 | 1.93E-01 | transcription_start_site | - | 53295 | 53295 | -970  | 15278 | AN3290 |
| 2972 | CONTIG55 | 54093 | 54437 | 0.95 | 1.93E-01 | transcription_start_site | - | 52958 | 52958 | -1307 | 15279 | AN3290 |
| 2972 | CONTIG55 | 54093 | 54437 | 0.95 | 1.93E-01 | transcription_start_site | - | 52701 | 52701 | -1564 | 15280 | AN3290 |
| 2972 | CONTIG55 | 54093 | 54437 | 0.95 | 1.93E-01 | transcription_start_site | - | 52456 | 52456 | -1809 | 15281 | AN3290 |
| 2972 | CONTIG55 | 54093 | 54437 | 0.95 | 1.93E-01 | transcription_start_site | - | 51698 | 51698 | -2567 | 15282 | AN3290 |
| 2972 | CONTIG55 | 54093 | 54437 | 0.95 | 1.93E-01 | transcription_start_site | + | 55311 | 55311 | -1046 | 15283 | AN3291 |
| 2972 | CONTIG55 | 54093 | 54437 | 0.95 | 1.93E-01 | transcription_start_site | + | 55712 | 55712 | -1447 | 15284 | AN3291 |
| 2972 | CONTIG55 | 54093 | 54437 | 0.95 | 1.93E-01 | transcription_start_site | + | 56083 | 56083 | -1818 | 15285 | AN3291 |
| 1054 | CONTIG55 | 60453 | 60742 | 1.86 | 3.61E-03 | transcription_start_site | - | 57789 | 57789 | -2808 | 15286 | AN3292 |
| 1054 | CONTIG55 | 60453 | 60742 | 1.86 | 3.61E-03 | transcription_start_site | - | 57654 | 57654 | -2943 | 15287 | AN3292 |
| 1054 | CONTIG55 | 60453 | 60742 | 1.86 | 3.61E-03 | transcription_start_site | - | 57399 | 57399 | -3198 | 15288 | AN3292 |
| 2972 | CONTIG55 | 54093 | 54437 | 0.95 | 1.93E-01 | transcription_start_site | + | 59257 | 59257 | -4992 | 15289 | AN3293 |
| 1054 | CONTIG55 | 60453 | 60742 | 1.86 | 3.61E-03 | transcription_start_site | + | 60731 | 60731 | -133  | 15290 | AN3294 |
| 1054 | CONTIG55 | 60453 | 60742 | 1.86 | 3.61E-03 | transcription_start_site | + | 61068 | 61068 | -470  | 15291 | AN3294 |
| 1054 | CONTIG55 | 60453 | 60742 | 1.86 | 3.61E-03 | transcription_start_site | + | 61165 | 61165 | -567  | 15292 | AN3294 |
| 1054 | CONTIG55 | 60453 | 60742 | 1.86 | 3.61E-03 | transcription_start_site | + | 61273 | 61273 | -675  | 15293 | AN3294 |
| 1054 | CONTIG55 | 60453 | 60742 | 1.86 | 3.61E-03 | transcription_start_site | + | 61515 | 61515 | -917  | 15294 | AN3294 |
| 1054 | CONTIG55 | 60453 | 60742 | 1.86 | 3.61E-03 | transcription_start_site | + | 61644 | 61644 | -1046 | 15295 | AN3294 |
| 1054 | CONTIG55 | 60453 | 60742 | 1.86 | 3.61E-03 | transcription_start_site | + | 61793 | 61793 | -1195 | 15296 | AN3294 |
| 1054 | CONTIG55 | 60453 | 60742 | 1.86 | 3.61E-03 | transcription_start_site | + | 63160 | 63160 | -2562 | 15297 | AN3295 |
| 2578 | CONTIG55 | 63153 | 63442 | 1.17 | 8.01E-02 | transcription_start_site | + | 63160 | 63160 | 137   | 15297 | AN3295 |
| 1054 | CONTIG55 | 60453 | 60742 | 1.86 | 3.61E-03 | transcription_start_site | + | 64417 | 64417 | -3819 | 15298 | AN3296 |
| 1054 | CONTIG55 | 60453 | 60742 | 1.86 | 3.61E-03 | transcription_start_site | + | 64731 | 64731 | -4133 | 15299 | AN3296 |
| 2578 | CONTIG55 | 63153 | 63442 | 1.17 | 8.01E-02 | transcription_start_site | + | 64417 | 64417 | -1119 | 15298 | AN3296 |
| 2578 | CONTIG55 | 63153 | 63442 | 1.17 | 8.01E-02 | transcription_start_site | + | 64731 | 64731 | -1433 | 15299 | AN3296 |
| 2578 | CONTIG55 | 63153 | 63442 | 1.17 | 8.01E-02 | transcription_start_site | + | 67748 | 67748 | -4450 | 15302 | AN3298 |
| 2578 | CONTIG55 | 63153 | 63442 | 1.17 | 8.01E-02 | transcription_start_site | + | 68115 | 68115 | -4817 | 15303 | AN3298 |
| 2578 | CONTIG55 | 63153 | 63442 | 1.17 | 8.01E-02 | transcription_start_site | + | 68279 | 68279 | -4981 | 15304 | AN3298 |
| 2742 | CONTIG55 | 73428 | 73718 | 1.1  | 1.08E-01 | transcription_start_site | - | 69711 | 69711 | -3862 | 15305 | AN3299 |
| 2742 | CONTIG55 | 73428 | 73718 | 1.1  | 1.08E-01 | transcription_start_site | - | 69502 | 69502 | -4071 | 15306 | AN3299 |
| 2742 | CONTIG55 | 73428 | 73718 | 1.1  | 1.08E-01 | transcription_start_site | + | 72752 | 72752 | 821   | 15310 | AN3300 |
| 2742 | CONTIG55 | 73428 | 73718 | 1.1  | 1.08E-01 | transcription_start_site | + | 73787 | 73787 | -214  | 15311 | AN3301 |
| 2742 | CONTIG55 | 73428 | 73718 | 1.1  | 1.08E-01 | transcription_start_site | + | 74014 | 74014 | -441  | 15312 | AN3301 |
| 2742 | CONTIG55 | 73428 | 73718 | 1.1  | 1.08E-01 | transcription_start_site | + | 74882 | 74882 | -1309 | 15313 | AN3301 |
| 2742 | CONTIG55 | 73428 | 73718 | 1.1  | 1.08E-01 | transcription_start_site | + | 75504 | 75504 | -1931 | 15314 | AN3301 |
| 2742 | CONTIG55 | 73428 | 73718 | 1.1  | 1.08E-01 | transcription_start_site | + | 76746 | 76746 | -3173 | 15315 | AN3302 |
| 2742 | CONTIG55 | 73428 | 73718 | 1.1  | 1.08E-01 | transcription_start_site | + | 77491 | 77491 | -3918 | 15316 | AN3302 |

|      |          |        |        |      |          |                          |   |        |        |       |       |        |
|------|----------|--------|--------|------|----------|--------------------------|---|--------|--------|-------|-------|--------|
| 270  | CONTIG55 | 100054 | 100328 | 2.8  | 0.00E+00 | transcription_start_site | - | 99189  | 99189  | -1002 | 15338 | AN3307 |
| 270  | CONTIG55 | 100054 | 100328 | 2.8  | 0.00E+00 | transcription_start_site | - | 98759  | 98759  | -1432 | 15339 | AN3307 |
| 270  | CONTIG55 | 100054 | 100328 | 2.8  | 0.00E+00 | transcription_start_site | - | 98511  | 98511  | -1680 | 15340 | AN3307 |
| 2469 | CONTIG55 | 97369  | 97628  | 1.21 | 6.84E-02 | transcription_start_site | - | 98511  | 98511  | 1012  | 15340 | AN3307 |
| 2469 | CONTIG55 | 97369  | 97628  | 1.21 | 6.84E-02 | transcription_start_site | - | 92421  | 92421  | -5077 | 15341 | AN3307 |
| 2743 | CONTIG55 | 93171  | 94775  | 1.1  | 1.08E-01 | transcription_start_site | - | 92421  | 92421  | -1552 | 15341 | AN3307 |
| 2873 | CONTIG55 | 101639 | 102068 | 1.02 | 1.44E-01 | transcription_start_site | - | 99189  | 99189  | -2664 | 15338 | AN3307 |
| 2873 | CONTIG55 | 101639 | 102068 | 1.02 | 1.44E-01 | transcription_start_site | - | 98759  | 98759  | -3094 | 15339 | AN3307 |
| 2873 | CONTIG55 | 101639 | 102068 | 1.02 | 1.44E-01 | transcription_start_site | - | 98511  | 98511  | -3342 | 15340 | AN3307 |
| 270  | CONTIG55 | 100054 | 100328 | 2.8  | 0.00E+00 | transcription_start_site | + | 102033 | 102033 | -1842 | 15342 | AN3308 |
| 270  | CONTIG55 | 100054 | 100328 | 2.8  | 0.00E+00 | transcription_start_site | + | 103153 | 103153 | -2962 | 15343 | AN3308 |
| 2469 | CONTIG55 | 97369  | 97628  | 1.21 | 6.84E-02 | transcription_start_site | + | 102033 | 102033 | -4534 | 15342 | AN3308 |
| 2873 | CONTIG55 | 101639 | 102068 | 1.02 | 1.44E-01 | transcription_start_site | + | 102033 | 102033 | -179  | 15342 | AN3308 |
| 2873 | CONTIG55 | 101639 | 102068 | 1.02 | 1.44E-01 | transcription_start_site | + | 103153 | 103153 | -1299 | 15343 | AN3308 |
| 270  | CONTIG55 | 100054 | 100328 | 2.8  | 0.00E+00 | transcription_start_site | + | 104572 | 104572 | -4381 | 15344 | AN3309 |
| 270  | CONTIG55 | 100054 | 100328 | 2.8  | 0.00E+00 | transcription_start_site | + | 104690 | 104690 | -4499 | 15345 | AN3309 |
| 270  | CONTIG55 | 100054 | 100328 | 2.8  | 0.00E+00 | transcription_start_site | + | 105157 | 105157 | -4966 | 15346 | AN3309 |
| 1021 | CONTIG55 | 104254 | 104753 | 1.89 | 3.03E-03 | transcription_start_site | + | 104572 | 104572 | -68   | 15344 | AN3309 |
| 1021 | CONTIG55 | 104254 | 104753 | 1.89 | 3.03E-03 | transcription_start_site | + | 104690 | 104690 | -186  | 15345 | AN3309 |
| 1021 | CONTIG55 | 104254 | 104753 | 1.89 | 3.03E-03 | transcription_start_site | + | 105157 | 105157 | -653  | 15346 | AN3309 |
| 1021 | CONTIG55 | 104254 | 104753 | 1.89 | 3.03E-03 | transcription_start_site | + | 105895 | 105895 | -1391 | 15347 | AN3309 |
| 1021 | CONTIG55 | 104254 | 104753 | 1.89 | 3.03E-03 | transcription_start_site | + | 105974 | 105974 | -1470 | 15348 | AN3309 |
| 1021 | CONTIG55 | 104254 | 104753 | 1.89 | 3.03E-03 | transcription_start_site | + | 106254 | 106254 | -1750 | 15349 | AN3309 |
| 1021 | CONTIG55 | 104254 | 104753 | 1.89 | 3.03E-03 | transcription_start_site | + | 106698 | 106698 | -2194 | 15350 | AN3309 |
| 2655 | CONTIG55 | 106279 | 106638 | 1.14 | 9.24E-02 | transcription_start_site | + | 106254 | 106254 | 204   | 15349 | AN3309 |
| 2655 | CONTIG55 | 106279 | 106638 | 1.14 | 9.24E-02 | transcription_start_site | + | 106698 | 106698 | -239  | 15350 | AN3309 |
| 2655 | CONTIG55 | 106279 | 106638 | 1.14 | 9.24E-02 | transcription_start_site | + | 105974 | 105974 | 484   | 15348 | AN3309 |
| 2655 | CONTIG55 | 106279 | 106638 | 1.14 | 9.24E-02 | transcription_start_site | + | 105895 | 105895 | 563   | 15347 | AN3309 |
| 2873 | CONTIG55 | 101639 | 102068 | 1.02 | 1.44E-01 | transcription_start_site | + | 104572 | 104572 | -2718 | 15344 | AN3309 |
| 2873 | CONTIG55 | 101639 | 102068 | 1.02 | 1.44E-01 | transcription_start_site | + | 104690 | 104690 | -2836 | 15345 | AN3309 |
| 2873 | CONTIG55 | 101639 | 102068 | 1.02 | 1.44E-01 | transcription_start_site | + | 105157 | 105157 | -3303 | 15346 | AN3309 |
| 2873 | CONTIG55 | 101639 | 102068 | 1.02 | 1.44E-01 | transcription_start_site | + | 105895 | 105895 | -4041 | 15347 | AN3309 |
| 2873 | CONTIG55 | 101639 | 102068 | 1.02 | 1.44E-01 | transcription_start_site | + | 105974 | 105974 | -4120 | 15348 | AN3309 |
| 2873 | CONTIG55 | 101639 | 102068 | 1.02 | 1.44E-01 | transcription_start_site | + | 106254 | 106254 | -4400 | 15349 | AN3309 |
| 2873 | CONTIG55 | 101639 | 102068 | 1.02 | 1.44E-01 | transcription_start_site | + | 106698 | 106698 | -4844 | 15350 | AN3309 |
| 2941 | CONTIG55 | 137327 | 137616 | 0.98 | 1.66E-01 | transcription_start_site | - | 134744 | 134744 | -2727 | 15382 | AN3318 |
| 2941 | CONTIG55 | 137327 | 137616 | 0.98 | 1.66E-01 | transcription_start_site | - | 134518 | 134518 | -2953 | 15383 | AN3318 |
| 2941 | CONTIG55 | 137327 | 137616 | 0.98 | 1.66E-01 | transcription_start_site | - | 134415 | 134415 | -3056 | 15384 | AN3318 |
| 2941 | CONTIG55 | 137327 | 137616 | 0.98 | 1.66E-01 | transcription_start_site | - | 134282 | 134282 | -3189 | 15385 | AN3318 |
| 2941 | CONTIG55 | 137327 | 137616 | 0.98 | 1.66E-01 | transcription_start_site | - | 133203 | 133203 | -4268 | 15386 | AN3318 |
| 2941 | CONTIG55 | 137327 | 137616 | 0.98 | 1.66E-01 | transcription_start_site | - | 132928 | 132928 | -4543 | 15387 | AN3318 |
| 2941 | CONTIG55 | 137327 | 137616 | 0.98 | 1.66E-01 | transcription_start_site | - | 132410 | 132410 | -5061 | 15388 | AN3318 |
| 2941 | CONTIG55 | 137327 | 137616 | 0.98 | 1.66E-01 | transcription_start_site | + | 137154 | 137154 | 317   | 15396 | AN3319 |
| 2941 | CONTIG55 | 137327 | 137616 | 0.98 | 1.66E-01 | transcription_start_site | + | 136921 | 136921 | 550   | 15395 | AN3319 |
| 2941 | CONTIG55 | 137327 | 137616 | 0.98 | 1.66E-01 | transcription_start_site | + | 136742 | 136742 | 729   | 15394 | AN3319 |
| 1055 | CONTIG55 | 180906 | 181255 | 1.86 | 3.61E-03 | transcription_start_site | + | 183328 | 183328 | -2247 | 15421 | AN3329 |
| 2939 | CONTIG55 | 189546 | 190475 | 0.98 | 1.50E-01 | transcription_start_site | - | 189408 | 189408 | -602  | 15425 | AN3330 |
| 2939 | CONTIG55 | 189546 | 190475 | 0.98 | 1.50E-01 | transcription_start_site | - | 190692 | 190692 | 681   | 15424 | AN3330 |
| 2939 | CONTIG55 | 189546 | 190475 | 0.98 | 1.50E-01 | transcription_start_site | - | 191102 | 191102 | 1091  | 15423 | AN3330 |
| 2656 | CONTIG55 | 204690 | 205051 | 1.14 | 9.24E-02 | transcription_start_site | - | 204625 | 204625 | -245  | 15432 | AN3334 |
| 2656 | CONTIG55 | 204690 | 205051 | 1.14 | 9.24E-02 | transcription_start_site | - | 204074 | 204074 | -796  | 15433 | AN3334 |
| 2656 | CONTIG55 | 204690 | 205051 | 1.14 | 9.24E-02 | transcription_start_site | - | 203728 | 203728 | -1142 | 15434 | AN3334 |
| 2656 | CONTIG55 | 204690 | 205051 | 1.14 | 9.24E-02 | transcription_start_site | + | 208427 | 208427 | -3556 | 15435 | AN3335 |
| 2656 | CONTIG55 | 204690 | 205051 | 1.14 | 9.24E-02 | transcription_start_site | + | 208880 | 208880 | -4009 | 15436 | AN3335 |
| 2348 | CONTIG55 | 236788 | 237054 | 1.25 | 5.88E-02 | transcription_start_site | - | 236412 | 236412 | -509  | 15453 | AN3342 |
| 2348 | CONTIG55 | 236788 | 237054 | 1.25 | 5.88E-02 | transcription_start_site | - | 236103 | 236103 | -818  | 15454 | AN3342 |
| 2348 | CONTIG55 | 236788 | 237054 | 1.25 | 5.88E-02 | transcription_start_site | - | 233605 | 233605 | -3316 | 15455 | AN3342 |

|      |          |        |        |      |          |                          |   |        |        |       |       |        |
|------|----------|--------|--------|------|----------|--------------------------|---|--------|--------|-------|-------|--------|
| 2348 | CONTIG55 | 236788 | 237054 | 1.25 | 5.88E-02 | transcription_start_site | - | 233290 | 233290 | -3631 | 15456 | AN3342 |
| 2348 | CONTIG55 | 236788 | 237054 | 1.25 | 5.88E-02 | transcription_start_site | - | 237995 | 237995 | 1074  | 15463 | AN3343 |
| 433  | CONTIG55 | 264692 | 264957 | 2.54 | 0.00E+00 | transcription_start_site | - | 262712 | 262712 | -2112 | 15490 | AN3349 |
| 433  | CONTIG55 | 264692 | 264957 | 2.54 | 0.00E+00 | transcription_start_site | - | 262448 | 262448 | -2376 | 15491 | AN3349 |
| 433  | CONTIG55 | 264692 | 264957 | 2.54 | 0.00E+00 | transcription_start_site | - | 262376 | 262376 | -2448 | 15492 | AN3349 |
| 433  | CONTIG55 | 264692 | 264957 | 2.54 | 0.00E+00 | transcription_start_site | - | 262171 | 262171 | -2653 | 15493 | AN3349 |
| 433  | CONTIG55 | 264692 | 264957 | 2.54 | 0.00E+00 | transcription_start_site | - | 261715 | 261715 | -3109 | 15494 | AN3349 |
| 433  | CONTIG55 | 264692 | 264957 | 2.54 | 0.00E+00 | transcription_start_site | - | 261053 | 261053 | -3771 | 15495 | AN3349 |
| 433  | CONTIG55 | 264692 | 264957 | 2.54 | 0.00E+00 | transcription_start_site | - | 260786 | 260786 | -4038 | 15496 | AN3349 |
| 433  | CONTIG55 | 264692 | 264957 | 2.54 | 0.00E+00 | transcription_start_site | - | 260722 | 260722 | -4102 | 15497 | AN3349 |
| 433  | CONTIG55 | 264692 | 264957 | 2.54 | 0.00E+00 | transcription_start_site | - | 260482 | 260482 | -4342 | 15498 | AN3349 |
| 433  | CONTIG55 | 264692 | 264957 | 2.54 | 0.00E+00 | transcription_start_site | - | 260336 | 260336 | -4488 | 15499 | AN3349 |
| 433  | CONTIG55 | 264692 | 264957 | 2.54 | 0.00E+00 | transcription_start_site | - | 260203 | 260203 | -4621 | 15500 | AN3349 |
| 433  | CONTIG55 | 264692 | 264957 | 2.54 | 0.00E+00 | transcription_start_site | - | 260082 | 260082 | -4742 | 15501 | AN3349 |
| 433  | CONTIG55 | 264692 | 264957 | 2.54 | 0.00E+00 | transcription_start_site | - | 259837 | 259837 | -4987 | 15502 | AN3349 |
| 433  | CONTIG55 | 264692 | 264957 | 2.54 | 0.00E+00 | transcription_start_site | - | 259700 | 259700 | -5124 | 15503 | AN3349 |
| 2349 | CONTIG55 | 275628 | 276127 | 1.25 | 5.88E-02 | transcription_start_site | - | 276262 | 276262 | 384   | 15524 | AN3353 |
| 2349 | CONTIG55 | 275628 | 276127 | 1.25 | 5.88E-02 | transcription_start_site | - | 275420 | 275420 | -457  | 15525 | AN3353 |
| 2349 | CONTIG55 | 275628 | 276127 | 1.25 | 5.88E-02 | transcription_start_site | + | 278486 | 278486 | -2608 | 15530 | AN3355 |
| 2349 | CONTIG55 | 275628 | 276127 | 1.25 | 5.88E-02 | transcription_start_site | + | 278720 | 278720 | -2842 | 15531 | AN3355 |
| 2349 | CONTIG55 | 275628 | 276127 | 1.25 | 5.88E-02 | transcription_start_site | + | 279009 | 279009 | -3131 | 15532 | AN3355 |
| 2349 | CONTIG55 | 275628 | 276127 | 1.25 | 5.88E-02 | transcription_start_site | + | 279334 | 279334 | -3456 | 15533 | AN3355 |
| 2349 | CONTIG55 | 275628 | 276127 | 1.25 | 5.88E-02 | transcription_start_site | + | 279486 | 279486 | -3608 | 15534 | AN3355 |
| 2349 | CONTIG55 | 275628 | 276127 | 1.25 | 5.88E-02 | transcription_start_site | + | 280558 | 280558 | -4680 | 15535 | AN3355 |
| 2349 | CONTIG55 | 275628 | 276127 | 1.25 | 5.88E-02 | transcription_start_site | + | 280847 | 280847 | -4969 | 15536 | AN3355 |
| 535  | CONTIG55 | 291845 | 292265 | 2.39 | 0.00E+00 | transcription_start_site | - | 291005 | 291005 | -1050 | 15543 | AN3357 |
| 535  | CONTIG55 | 291845 | 292265 | 2.39 | 0.00E+00 | transcription_start_site | - | 289579 | 289579 | -2476 | 15544 | AN3357 |
| 535  | CONTIG55 | 291845 | 292265 | 2.39 | 0.00E+00 | transcription_start_site | + | 293530 | 293530 | -1475 | 15545 | AN3358 |
| 535  | CONTIG55 | 291845 | 292265 | 2.39 | 0.00E+00 | transcription_start_site | + | 294365 | 294365 | -2310 | 15546 | AN3358 |
| 535  | CONTIG55 | 291845 | 292265 | 2.39 | 0.00E+00 | transcription_start_site | + | 294565 | 294565 | -2510 | 15547 | AN3358 |
| 156  | CONTIG55 | 306085 | 306516 | 3.03 | 0.00E+00 | transcription_start_site | - | 301939 | 301939 | -4361 | 15549 | AN3360 |
| 2808 | CONTIG55 | 300985 | 301489 | 1.06 | 1.25E-01 | transcription_start_site | - | 300675 | 300675 | -562  | 15550 | AN3360 |
| 2808 | CONTIG55 | 300985 | 301489 | 1.06 | 1.25E-01 | transcription_start_site | - | 301939 | 301939 | 702   | 15549 | AN3360 |
| 2808 | CONTIG55 | 300985 | 301489 | 1.06 | 1.25E-01 | transcription_start_site | - | 300529 | 300529 | -708  | 15551 | AN3360 |
| 156  | CONTIG55 | 306085 | 306516 | 3.03 | 0.00E+00 | transcription_start_site | - | 306023 | 306023 | -277  | 15552 | AN3361 |
| 156  | CONTIG55 | 306085 | 306516 | 3.03 | 0.00E+00 | transcription_start_site | - | 305686 | 305686 | -614  | 15553 | AN3361 |
| 156  | CONTIG55 | 306085 | 306516 | 3.03 | 0.00E+00 | transcription_start_site | - | 305573 | 305573 | -727  | 15554 | AN3361 |
| 156  | CONTIG55 | 306085 | 306516 | 3.03 | 0.00E+00 | transcription_start_site | - | 305037 | 305037 | -1263 | 15555 | AN3361 |
| 156  | CONTIG55 | 306085 | 306516 | 3.03 | 0.00E+00 | transcription_start_site | - | 304840 | 304840 | -1460 | 15556 | AN3361 |
| 488  | CONTIG55 | 328053 | 328332 | 2.46 | 0.00E+00 | transcription_start_site | - | 324278 | 324278 | -3914 | 15565 | AN3367 |
| 488  | CONTIG55 | 328053 | 328332 | 2.46 | 0.00E+00 | transcription_start_site | - | 323939 | 323939 | -4253 | 15566 | AN3367 |
| 488  | CONTIG55 | 328053 | 328332 | 2.46 | 0.00E+00 | transcription_start_site | - | 327238 | 327238 | -954  | 15567 | AN3368 |
| 488  | CONTIG55 | 328053 | 328332 | 2.46 | 0.00E+00 | transcription_start_site | - | 327046 | 327046 | -1146 | 15568 | AN3368 |
| 488  | CONTIG55 | 328053 | 328332 | 2.46 | 0.00E+00 | transcription_start_site | - | 326041 | 326041 | -2151 | 15569 | AN3368 |
| 488  | CONTIG55 | 328053 | 328332 | 2.46 | 0.00E+00 | transcription_start_site | - | 325558 | 325558 | -2634 | 15570 | AN3368 |
| 488  | CONTIG55 | 328053 | 328332 | 2.46 | 0.00E+00 | transcription_start_site | - | 325251 | 325251 | -2941 | 15571 | AN3368 |
| 488  | CONTIG55 | 328053 | 328332 | 2.46 | 0.00E+00 | transcription_start_site | + | 330682 | 330682 | -2489 | 15572 | AN3369 |
| 488  | CONTIG55 | 328053 | 328332 | 2.46 | 0.00E+00 | transcription_start_site | + | 330967 | 330967 | -2774 | 15573 | AN3369 |
| 488  | CONTIG55 | 328053 | 328332 | 2.46 | 0.00E+00 | transcription_start_site | + | 332115 | 332115 | -3922 | 15574 | AN3369 |
| 1820 | CONTIG55 | 357538 | 357887 | 1.44 | 2.62E-02 | transcription_start_site | + | 356915 | 356915 | 797   | 15590 | AN3378 |
| 1820 | CONTIG55 | 357538 | 357887 | 1.44 | 2.62E-02 | transcription_start_site | + | 359571 | 359571 | -1858 | 15591 | AN3379 |
| 1820 | CONTIG55 | 357538 | 357887 | 1.44 | 2.62E-02 | transcription_start_site | + | 360878 | 360878 | -3165 | 15592 | AN3379 |
| 2942 | CONTIG55 | 381394 | 381953 | 0.98 | 1.66E-01 | transcription_start_site | - | 379509 | 379509 | -2164 | 15608 | AN3384 |
| 2942 | CONTIG55 | 381394 | 381953 | 0.98 | 1.66E-01 | transcription_start_site | + | 381785 | 381785 | -111  | 15610 | AN3385 |
| 2942 | CONTIG55 | 381394 | 381953 | 0.98 | 1.66E-01 | transcription_start_site | + | 381254 | 381254 | 419   | 15609 | AN3385 |
| 2942 | CONTIG55 | 381394 | 381953 | 0.98 | 1.66E-01 | transcription_start_site | + | 382371 | 382371 | -697  | 15611 | AN3385 |
| 2942 | CONTIG55 | 381394 | 381953 | 0.98 | 1.66E-01 | transcription_start_site | + | 383877 | 383877 | -2203 | 15612 | AN3386 |



|      |          |        |        |      |          |                          |   |        |        |       |       |        |
|------|----------|--------|--------|------|----------|--------------------------|---|--------|--------|-------|-------|--------|
| 2942 | CONTIG55 | 381394 | 381953 | 0.98 | 1.66E-01 | transcription_start_site | + | 384583 | 384583 | -2909 | 15613 | AN3386 |
| 296  | CONTIG55 | 393234 | 393751 | 2.76 | 0.00E+00 | transcription_start_site | - | 393119 | 393119 | -373  | 15615 | AN3387 |
| 296  | CONTIG55 | 393234 | 393751 | 2.76 | 0.00E+00 | transcription_start_site | - | 392440 | 392440 | -1052 | 15616 | AN3387 |
| 1665 | CONTIG55 | 392264 | 392918 | 1.51 | 9.21E-03 | transcription_start_site | - | 392440 | 392440 | -151  | 15616 | AN3387 |
| 1665 | CONTIG55 | 392264 | 392918 | 1.51 | 9.21E-03 | transcription_start_site | - | 393119 | 393119 | 528   | 15615 | AN3387 |
| 1667 | CONTIG55 | 394819 | 395170 | 1.51 | 1.84E-02 | transcription_start_site | - | 393119 | 393119 | -1875 | 15615 | AN3387 |
| 1667 | CONTIG55 | 394819 | 395170 | 1.51 | 1.84E-02 | transcription_start_site | - | 392440 | 392440 | -2554 | 15616 | AN3387 |
| 296  | CONTIG55 | 393234 | 393751 | 2.76 | 0.00E+00 | transcription_start_site | + | 398500 | 398500 | -5007 | 15617 | AN3388 |
| 1667 | CONTIG55 | 394819 | 395170 | 1.51 | 1.84E-02 | transcription_start_site | + | 398500 | 398500 | -3505 | 15617 | AN3388 |
| 1667 | CONTIG55 | 394819 | 395170 | 1.51 | 1.84E-02 | transcription_start_site | + | 398823 | 398823 | -3828 | 15618 | AN3388 |
| 1667 | CONTIG55 | 394819 | 395170 | 1.51 | 1.84E-02 | transcription_start_site | + | 398996 | 398996 | -4001 | 15619 | AN3388 |
| 1668 | CONTIG55 | 423983 | 424339 | 1.51 | 1.84E-02 | transcription_start_site | - | 422169 | 422169 | -1992 | 15638 | AN3394 |
| 1668 | CONTIG55 | 423983 | 424339 | 1.51 | 1.84E-02 | transcription_start_site | - | 421537 | 421537 | -2624 | 15639 | AN3394 |
| 1668 | CONTIG55 | 423983 | 424339 | 1.51 | 1.84E-02 | transcription_start_site | + | 423636 | 423636 | 525   | 15643 | AN3395 |
| 1668 | CONTIG55 | 423983 | 424339 | 1.51 | 1.84E-02 | transcription_start_site | + | 423493 | 423493 | 668   | 15642 | AN3395 |
| 1668 | CONTIG55 | 423983 | 424339 | 1.51 | 1.84E-02 | transcription_start_site | + | 423038 | 423038 | 1123  | 15641 | AN3395 |
| 1668 | CONTIG55 | 423983 | 424339 | 1.51 | 1.84E-02 | transcription_start_site | + | 425016 | 425016 | -855  | 15644 | AN3396 |
| 1668 | CONTIG55 | 423983 | 424339 | 1.51 | 1.84E-02 | transcription_start_site | + | 425793 | 425793 | -1632 | 15645 | AN3396 |
| 1668 | CONTIG55 | 423983 | 424339 | 1.51 | 1.84E-02 | transcription_start_site | + | 427065 | 427065 | -2904 | 15646 | AN3396 |
| 2805 | CONTIG55 | 435828 | 436867 | 1.06 | 1.07E-01 | transcription_start_site | + | 435030 | 435030 | 1317  | 15652 | AN3398 |
| 2805 | CONTIG55 | 435828 | 436867 | 1.06 | 1.07E-01 | transcription_start_site | + | 434866 | 434866 | 1481  | 15651 | AN3398 |
| 2805 | CONTIG55 | 435828 | 436867 | 1.06 | 1.07E-01 | transcription_start_site | + | 436259 | 436259 | 88    | 15654 | AN3399 |
| 2805 | CONTIG55 | 435828 | 436867 | 1.06 | 1.07E-01 | transcription_start_site | + | 436464 | 436464 | -116  | 15655 | AN3399 |
| 2805 | CONTIG55 | 435828 | 436867 | 1.06 | 1.07E-01 | transcription_start_site | + | 435764 | 435764 | 583   | 15653 | AN3399 |
| 2805 | CONTIG55 | 435828 | 436867 | 1.06 | 1.07E-01 | transcription_start_site | + | 437349 | 437349 | -1001 | 15656 | AN3399 |
| 2805 | CONTIG55 | 435828 | 436867 | 1.06 | 1.07E-01 | transcription_start_site | + | 437722 | 437722 | -1374 | 15657 | AN3400 |
| 2805 | CONTIG55 | 435828 | 436867 | 1.06 | 1.07E-01 | transcription_start_site | + | 438301 | 438301 | -1953 | 15658 | AN3400 |
| 2805 | CONTIG55 | 435828 | 436867 | 1.06 | 1.07E-01 | transcription_start_site | + | 438574 | 438574 | -2226 | 15659 | AN3400 |
| 2805 | CONTIG55 | 435828 | 436867 | 1.06 | 1.07E-01 | transcription_start_site | + | 441631 | 441631 | -5283 | 15664 | AN3402 |
| 2805 | CONTIG55 | 435828 | 436867 | 1.06 | 1.07E-01 | transcription_start_site | + | 441842 | 441842 | -5494 | 15665 | AN3402 |
| 2346 | CONTIG55 | 449329 | 450428 | 1.25 | 3.61E-02 | transcription_start_site | - | 446161 | 446161 | -3717 | 15673 | AN3403 |
| 2346 | CONTIG55 | 449329 | 450428 | 1.25 | 3.61E-02 | transcription_start_site | + | 449352 | 449352 | 526   | 15677 | AN3405 |
| 1821 | CONTIG55 | 455404 | 455678 | 1.44 | 2.62E-02 | transcription_start_site | - | 452611 | 452611 | -2930 | 15678 | AN3406 |
| 1821 | CONTIG55 | 455404 | 455678 | 1.44 | 2.62E-02 | transcription_start_site | - | 452386 | 452386 | -3155 | 15679 | AN3406 |
| 1821 | CONTIG55 | 455404 | 455678 | 1.44 | 2.62E-02 | transcription_start_site | - | 451862 | 451862 | -3679 | 15680 | AN3406 |
| 1821 | CONTIG55 | 455404 | 455678 | 1.44 | 2.62E-02 | transcription_start_site | + | 455050 | 455050 | 491   | 15683 | AN3407 |
| 1821 | CONTIG55 | 455404 | 455678 | 1.44 | 2.62E-02 | transcription_start_site | + | 454502 | 454502 | 1039  | 15682 | AN3407 |
| 2346 | CONTIG55 | 449329 | 450428 | 1.25 | 3.61E-02 | transcription_start_site | + | 454238 | 454238 | -4359 | 15681 | AN3407 |
| 2346 | CONTIG55 | 449329 | 450428 | 1.25 | 3.61E-02 | transcription_start_site | + | 454502 | 454502 | -4623 | 15682 | AN3407 |
| 2346 | CONTIG55 | 449329 | 450428 | 1.25 | 3.61E-02 | transcription_start_site | + | 455050 | 455050 | -5171 | 15683 | AN3407 |
| 1393 | CONTIG55 | 459980 | 460269 | 1.63 | 1.11E-02 | transcription_start_site | - | 459826 | 459826 | -298  | 15684 | AN3408 |
| 1393 | CONTIG55 | 459980 | 460269 | 1.63 | 1.11E-02 | transcription_start_site | - | 459554 | 459554 | -570  | 15685 | AN3408 |
| 1393 | CONTIG55 | 459980 | 460269 | 1.63 | 1.11E-02 | transcription_start_site | - | 459157 | 459157 | -967  | 15686 | AN3408 |
| 1393 | CONTIG55 | 459980 | 460269 | 1.63 | 1.11E-02 | transcription_start_site | - | 458888 | 458888 | -1236 | 15687 | AN3408 |
| 2463 | CONTIG55 | 460516 | 461611 | 1.21 | 4.42E-02 | transcription_start_site | - | 459826 | 459826 | -1237 | 15684 | AN3408 |
| 2463 | CONTIG55 | 460516 | 461611 | 1.21 | 4.42E-02 | transcription_start_site | - | 459554 | 459554 | -1509 | 15685 | AN3408 |
| 2463 | CONTIG55 | 460516 | 461611 | 1.21 | 4.42E-02 | transcription_start_site | - | 459157 | 459157 | -1906 | 15686 | AN3408 |
| 2463 | CONTIG55 | 460516 | 461611 | 1.21 | 4.42E-02 | transcription_start_site | - | 458888 | 458888 | -2175 | 15687 | AN3408 |
| 1393 | CONTIG55 | 459980 | 460269 | 1.63 | 1.11E-02 | transcription_start_site | + | 462473 | 462473 | -2348 | 15688 | AN3409 |
| 1393 | CONTIG55 | 459980 | 460269 | 1.63 | 1.11E-02 | transcription_start_site | + | 462541 | 462541 | -2416 | 15689 | AN3409 |
| 1393 | CONTIG55 | 459980 | 460269 | 1.63 | 1.11E-02 | transcription_start_site | + | 462732 | 462732 | -2607 | 15690 | AN3409 |
| 1393 | CONTIG55 | 459980 | 460269 | 1.63 | 1.11E-02 | transcription_start_site | + | 463422 | 463422 | -3297 | 15691 | AN3409 |
| 2463 | CONTIG55 | 460516 | 461611 | 1.21 | 4.42E-02 | transcription_start_site | + | 462473 | 462473 | -1409 | 15688 | AN3409 |
| 2463 | CONTIG55 | 460516 | 461611 | 1.21 | 4.42E-02 | transcription_start_site | + | 462541 | 462541 | -1477 | 15689 | AN3409 |
| 2463 | CONTIG55 | 460516 | 461611 | 1.21 | 4.42E-02 | transcription_start_site | + | 462732 | 462732 | -1668 | 15690 | AN3409 |
| 2463 | CONTIG55 | 460516 | 461611 | 1.21 | 4.42E-02 | transcription_start_site | + | 463422 | 463422 | -2358 | 15691 | AN3409 |
| 1166 | CONTIG55 | 469505 | 469944 | 1.78 | 5.20E-03 | transcription_start_site | - | 465990 | 465990 | -3734 | 15692 | AN3410 |

|      |          |        |        |      |          |                          |   |        |        |       |       |        |
|------|----------|--------|--------|------|----------|--------------------------|---|--------|--------|-------|-------|--------|
| 1166 | CONTIG55 | 469505 | 469944 | 1.78 | 5.20E-03 | transcription_start_site | - | 465757 | 465757 | -3967 | 15693 | AN3410 |
| 1166 | CONTIG55 | 469505 | 469944 | 1.78 | 5.20E-03 | transcription_start_site | - | 465635 | 465635 | -4089 | 15694 | AN3410 |
| 1166 | CONTIG55 | 469505 | 469944 | 1.78 | 5.20E-03 | transcription_start_site | - | 465291 | 465291 | -4433 | 15695 | AN3410 |
| 2657 | CONTIG55 | 470415 | 470684 | 1.14 | 9.24E-02 | transcription_start_site | - | 465990 | 465990 | -4559 | 15692 | AN3410 |
| 2657 | CONTIG55 | 470415 | 470684 | 1.14 | 9.24E-02 | transcription_start_site | - | 465757 | 465757 | -4792 | 15693 | AN3410 |
| 2657 | CONTIG55 | 470415 | 470684 | 1.14 | 9.24E-02 | transcription_start_site | - | 465635 | 465635 | -4914 | 15694 | AN3410 |
| 1166 | CONTIG55 | 469505 | 469944 | 1.78 | 5.20E-03 | transcription_start_site | - | 467718 | 467718 | -2006 | 15697 | AN3411 |
| 1166 | CONTIG55 | 469505 | 469944 | 1.78 | 5.20E-03 | transcription_start_site | - | 467465 | 467465 | -2259 | 15698 | AN3411 |
| 1166 | CONTIG55 | 469505 | 469944 | 1.78 | 5.20E-03 | transcription_start_site | - | 467333 | 467333 | -2391 | 15699 | AN3411 |
| 2657 | CONTIG55 | 470415 | 470684 | 1.14 | 9.24E-02 | transcription_start_site | - | 467718 | 467718 | -2831 | 15697 | AN3411 |
| 2657 | CONTIG55 | 470415 | 470684 | 1.14 | 9.24E-02 | transcription_start_site | - | 467465 | 467465 | -3084 | 15698 | AN3411 |
| 2657 | CONTIG55 | 470415 | 470684 | 1.14 | 9.24E-02 | transcription_start_site | - | 467333 | 467333 | -3216 | 15699 | AN3411 |
| 1166 | CONTIG55 | 469505 | 469944 | 1.78 | 5.20E-03 | transcription_start_site | - | 469266 | 469266 | -458  | 15700 | AN3412 |
| 1166 | CONTIG55 | 469505 | 469944 | 1.78 | 5.20E-03 | transcription_start_site | - | 469193 | 469193 | -531  | 15701 | AN3412 |
| 1166 | CONTIG55 | 469505 | 469944 | 1.78 | 5.20E-03 | transcription_start_site | - | 469064 | 469064 | -660  | 15702 | AN3412 |
| 1166 | CONTIG55 | 469505 | 469944 | 1.78 | 5.20E-03 | transcription_start_site | - | 468867 | 468867 | -857  | 15703 | AN3412 |
| 2657 | CONTIG55 | 470415 | 470684 | 1.14 | 9.24E-02 | transcription_start_site | - | 469266 | 469266 | -1283 | 15700 | AN3412 |
| 2657 | CONTIG55 | 470415 | 470684 | 1.14 | 9.24E-02 | transcription_start_site | - | 469193 | 469193 | -1356 | 15701 | AN3412 |
| 2657 | CONTIG55 | 470415 | 470684 | 1.14 | 9.24E-02 | transcription_start_site | - | 469064 | 469064 | -1485 | 15702 | AN3412 |
| 2657 | CONTIG55 | 470415 | 470684 | 1.14 | 9.24E-02 | transcription_start_site | - | 468867 | 468867 | -1682 | 15703 | AN3412 |
| 1166 | CONTIG55 | 469505 | 469944 | 1.78 | 5.20E-03 | transcription_start_site | + | 469790 | 469790 | -65   | 15704 | AN3413 |
| 1166 | CONTIG55 | 469505 | 469944 | 1.78 | 5.20E-03 | transcription_start_site | + | 469987 | 469987 | -262  | 15705 | AN3413 |
| 1166 | CONTIG55 | 469505 | 469944 | 1.78 | 5.20E-03 | transcription_start_site | + | 470256 | 470256 | -531  | 15706 | AN3413 |
| 1166 | CONTIG55 | 469505 | 469944 | 1.78 | 5.20E-03 | transcription_start_site | + | 470563 | 470563 | -838  | 15707 | AN3413 |
| 2657 | CONTIG55 | 470415 | 470684 | 1.14 | 9.24E-02 | transcription_start_site | + | 470563 | 470563 | -13   | 15707 | AN3413 |
| 2657 | CONTIG55 | 470415 | 470684 | 1.14 | 9.24E-02 | transcription_start_site | + | 470256 | 470256 | 293   | 15706 | AN3413 |
| 2657 | CONTIG55 | 470415 | 470684 | 1.14 | 9.24E-02 | transcription_start_site | + | 469987 | 469987 | 562   | 15705 | AN3413 |
| 2657 | CONTIG55 | 470415 | 470684 | 1.14 | 9.24E-02 | transcription_start_site | + | 469790 | 469790 | 759   | 15704 | AN3413 |
| 1166 | CONTIG55 | 469505 | 469944 | 1.78 | 5.20E-03 | transcription_start_site | + | 472116 | 472116 | -2391 | 15708 | AN3414 |
| 1166 | CONTIG55 | 469505 | 469944 | 1.78 | 5.20E-03 | transcription_start_site | + | 472456 | 472456 | -2731 | 15709 | AN3414 |
| 1166 | CONTIG55 | 469505 | 469944 | 1.78 | 5.20E-03 | transcription_start_site | + | 472672 | 472672 | -2947 | 15710 | AN3414 |
| 1166 | CONTIG55 | 469505 | 469944 | 1.78 | 5.20E-03 | transcription_start_site | + | 473110 | 473110 | -3385 | 15711 | AN3414 |
| 2657 | CONTIG55 | 470415 | 470684 | 1.14 | 9.24E-02 | transcription_start_site | + | 472116 | 472116 | -1566 | 15708 | AN3414 |
| 2657 | CONTIG55 | 470415 | 470684 | 1.14 | 9.24E-02 | transcription_start_site | + | 472456 | 472456 | -1906 | 15709 | AN3414 |
| 2657 | CONTIG55 | 470415 | 470684 | 1.14 | 9.24E-02 | transcription_start_site | + | 472672 | 472672 | -2122 | 15710 | AN3414 |
| 2657 | CONTIG55 | 470415 | 470684 | 1.14 | 9.24E-02 | transcription_start_site | + | 473110 | 473110 | -2560 | 15711 | AN3414 |
| 152  | CONTIG56 | 35711  | 36745  | 3.04 | 0.00E+00 | transcription_start_site | - | 31408  | 31408  | -4820 | 15742 | AN3431 |
| 152  | CONTIG56 | 35711  | 36745  | 3.04 | 0.00E+00 | transcription_start_site | - | 31179  | 31179  | -5049 | 15743 | AN3431 |
| 152  | CONTIG56 | 35711  | 36745  | 3.04 | 0.00E+00 | transcription_start_site | - | 31068  | 31068  | -5160 | 15744 | AN3431 |
| 152  | CONTIG56 | 35711  | 36745  | 3.04 | 0.00E+00 | transcription_start_site | - | 34687  | 34687  | -1541 | 15745 | AN3432 |
| 152  | CONTIG56 | 35711  | 36745  | 3.04 | 0.00E+00 | transcription_start_site | - | 34138  | 34138  | -2090 | 15746 | AN3432 |
| 337  | CONTIG56 | 39017  | 39430  | 2.71 | 3.61E-03 | transcription_start_site | - | 34687  | 34687  | -4536 | 15745 | AN3432 |
| 337  | CONTIG56 | 39017  | 39430  | 2.71 | 3.61E-03 | transcription_start_site | - | 34138  | 34138  | -5085 | 15746 | AN3432 |
| 915  | CONTIG56 | 37962  | 38611  | 1.99 | 2.18E-02 | transcription_start_site | - | 34687  | 34687  | -3599 | 15745 | AN3432 |
| 915  | CONTIG56 | 37962  | 38611  | 1.99 | 2.18E-02 | transcription_start_site | - | 34138  | 34138  | -4148 | 15746 | AN3432 |
| 337  | CONTIG56 | 39017  | 39430  | 2.71 | 3.61E-03 | transcription_start_site | - | 38713  | 38713  | -510  | 15747 | AN3433 |
| 337  | CONTIG56 | 39017  | 39430  | 2.71 | 3.61E-03 | transcription_start_site | - | 38544  | 38544  | -679  | 15748 | AN3433 |
| 337  | CONTIG56 | 39017  | 39430  | 2.71 | 3.61E-03 | transcription_start_site | - | 38385  | 38385  | -838  | 15749 | AN3433 |
| 915  | CONTIG56 | 37962  | 38611  | 1.99 | 2.18E-02 | transcription_start_site | - | 38385  | 38385  | 98    | 15749 | AN3433 |
| 915  | CONTIG56 | 37962  | 38611  | 1.99 | 2.18E-02 | transcription_start_site | - | 38544  | 38544  | 257   | 15748 | AN3433 |
| 915  | CONTIG56 | 37962  | 38611  | 1.99 | 2.18E-02 | transcription_start_site | - | 38713  | 38713  | 426   | 15747 | AN3433 |
| 337  | CONTIG56 | 39017  | 39430  | 2.71 | 3.61E-03 | transcription_start_site | + | 43563  | 43563  | -4339 | 15754 | AN3435 |
| 337  | CONTIG56 | 39017  | 39430  | 2.71 | 3.61E-03 | transcription_start_site | + | 44189  | 44189  | -4965 | 15755 | AN3435 |
| 337  | CONTIG56 | 39017  | 39430  | 2.71 | 3.61E-03 | transcription_start_site | + | 44335  | 44335  | -5111 | 15756 | AN3435 |
| 915  | CONTIG56 | 37962  | 38611  | 1.99 | 2.18E-02 | transcription_start_site | + | 43563  | 43563  | -5276 | 15754 | AN3435 |
| 892  | CONTIG57 | 9621   | 9892   | 2.01 | 4.36E-02 | transcription_start_site | - | 7737   | 7737   | -2019 | 15761 | AN3437 |
| 892  | CONTIG57 | 9621   | 9892   | 2.01 | 4.36E-02 | transcription_start_site | - | 7209   | 7209   | -2547 | 15762 | AN3437 |

|      |          |       |       |      |          |                          |   |       |       |       |       |        |
|------|----------|-------|-------|------|----------|--------------------------|---|-------|-------|-------|-------|--------|
| 104  | CONTIG57 | 14717 | 15137 | 3.22 | 9.51E-04 | transcription_start_site | - | 14504 | 14504 | -423  | 15763 | AN3438 |
| 104  | CONTIG57 | 14717 | 15137 | 3.22 | 9.51E-04 | transcription_start_site | - | 11929 | 11929 | -2998 | 15764 | AN3438 |
| 104  | CONTIG57 | 14717 | 15137 | 3.22 | 9.51E-04 | transcription_start_site | + | 16135 | 16135 | -1208 | 15765 | AN3439 |
| 104  | CONTIG57 | 14717 | 15137 | 3.22 | 9.51E-04 | transcription_start_site | + | 16299 | 16299 | -1372 | 15766 | AN3439 |
| 104  | CONTIG57 | 14717 | 15137 | 3.22 | 9.51E-04 | transcription_start_site | + | 16456 | 16456 | -1529 | 15767 | AN3439 |
| 104  | CONTIG57 | 14717 | 15137 | 3.22 | 9.51E-04 | transcription_start_site | + | 16517 | 16517 | -1590 | 15768 | AN3439 |
| 104  | CONTIG57 | 14717 | 15137 | 3.22 | 9.51E-04 | transcription_start_site | + | 16925 | 16925 | -1998 | 15769 | AN3439 |
| 477  | CONTIG57 | 24620 | 25042 | 2.48 | 1.11E-02 | transcription_start_site | - | 24408 | 24408 | -423  | 15770 | AN3441 |
| 477  | CONTIG57 | 24620 | 25042 | 2.48 | 1.11E-02 | transcription_start_site | - | 24032 | 24032 | -799  | 15771 | AN3441 |
| 477  | CONTIG57 | 24620 | 25042 | 2.48 | 1.11E-02 | transcription_start_site | - | 21729 | 21729 | -3102 | 15772 | AN3441 |
| 477  | CONTIG57 | 24620 | 25042 | 2.48 | 1.11E-02 | transcription_start_site | + | 25510 | 25510 | -679  | 15773 | AN3442 |
| 1737 | CONTIG58 | 15996 | 16400 | 1.48 | 3.03E-03 | transcription_start_site | + | 16595 | 16595 | -397  | 15778 | AN3445 |
| 1737 | CONTIG58 | 15996 | 16400 | 1.48 | 3.03E-03 | transcription_start_site | + | 15321 | 15321 | 877   | 15777 | AN3445 |
| 1737 | CONTIG58 | 15996 | 16400 | 1.48 | 3.03E-03 | transcription_start_site | + | 15177 | 15177 | 1021  | 15776 | AN3445 |
| 1737 | CONTIG58 | 15996 | 16400 | 1.48 | 3.03E-03 | transcription_start_site | + | 17007 | 17007 | -809  | 15779 | AN3446 |
| 1737 | CONTIG58 | 15996 | 16400 | 1.48 | 3.03E-03 | transcription_start_site | + | 17104 | 17104 | -906  | 15780 | AN3446 |
| 1737 | CONTIG58 | 15996 | 16400 | 1.48 | 3.03E-03 | transcription_start_site | + | 17403 | 17403 | -1205 | 15781 | AN3446 |
| 1737 | CONTIG58 | 15996 | 16400 | 1.48 | 3.03E-03 | transcription_start_site | + | 17508 | 17508 | -1310 | 15782 | AN3446 |
| 1737 | CONTIG58 | 15996 | 16400 | 1.48 | 3.03E-03 | transcription_start_site | + | 18076 | 18076 | -1878 | 15783 | AN3446 |
| 1737 | CONTIG58 | 15996 | 16400 | 1.48 | 3.03E-03 | transcription_start_site | + | 18273 | 18273 | -2075 | 15784 | AN3446 |
| 1737 | CONTIG58 | 15996 | 16400 | 1.48 | 3.03E-03 | transcription_start_site | + | 18879 | 18879 | -2681 | 15785 | AN3447 |
| 1737 | CONTIG58 | 15996 | 16400 | 1.48 | 3.03E-03 | transcription_start_site | + | 19195 | 19195 | -2997 | 15786 | AN3447 |
| 1737 | CONTIG58 | 15996 | 16400 | 1.48 | 3.03E-03 | transcription_start_site | + | 19392 | 19392 | -3194 | 15787 | AN3447 |
| 1512 | CONTIG58 | 29104 | 29378 | 1.57 | 1.54E-03 | transcription_start_site | - | 24885 | 24885 | -4356 | 15788 | AN3448 |
| 1512 | CONTIG58 | 29104 | 29378 | 1.57 | 1.54E-03 | transcription_start_site | - | 24616 | 24616 | -4625 | 15789 | AN3448 |
| 1512 | CONTIG58 | 29104 | 29378 | 1.57 | 1.54E-03 | transcription_start_site | - | 24380 | 24380 | -4861 | 15790 | AN3448 |
| 3015 | CONTIG58 | 25283 | 25632 | 0.89 | 9.24E-02 | transcription_start_site | - | 24885 | 24885 | -572  | 15788 | AN3448 |
| 3015 | CONTIG58 | 25283 | 25632 | 0.89 | 9.24E-02 | transcription_start_site | - | 24616 | 24616 | -841  | 15789 | AN3448 |
| 3015 | CONTIG58 | 25283 | 25632 | 0.89 | 9.24E-02 | transcription_start_site | - | 24380 | 24380 | -1077 | 15790 | AN3448 |
| 3015 | CONTIG58 | 25283 | 25632 | 0.89 | 9.24E-02 | transcription_start_site | - | 22978 | 22978 | -2479 | 15791 | AN3448 |
| 3015 | CONTIG58 | 25283 | 25632 | 0.89 | 9.24E-02 | transcription_start_site | + | 25956 | 25956 | -498  | 15792 | AN3449 |
| 1512 | CONTIG58 | 29104 | 29378 | 1.57 | 1.54E-03 | transcription_start_site | - | 28704 | 28704 | -537  | 15793 | AN3450 |
| 1512 | CONTIG58 | 29104 | 29378 | 1.57 | 1.54E-03 | transcription_start_site | - | 28353 | 28353 | -888  | 15794 | AN3450 |
| 1512 | CONTIG58 | 29104 | 29378 | 1.57 | 1.54E-03 | transcription_start_site | + | 29431 | 29431 | -190  | 15795 | AN3451 |
| 1512 | CONTIG58 | 29104 | 29378 | 1.57 | 1.54E-03 | transcription_start_site | + | 29742 | 29742 | -501  | 15796 | AN3451 |
| 1512 | CONTIG58 | 29104 | 29378 | 1.57 | 1.54E-03 | transcription_start_site | + | 30304 | 30304 | -1063 | 15797 | AN3451 |
| 1512 | CONTIG58 | 29104 | 29378 | 1.57 | 1.54E-03 | transcription_start_site | + | 30481 | 30481 | -1240 | 15798 | AN3451 |
| 1512 | CONTIG58 | 29104 | 29378 | 1.57 | 1.54E-03 | transcription_start_site | + | 30682 | 30682 | -1441 | 15799 | AN3451 |
| 1512 | CONTIG58 | 29104 | 29378 | 1.57 | 1.54E-03 | transcription_start_site | + | 33140 | 33140 | -3899 | 15800 | AN3451 |
| 3015 | CONTIG58 | 25283 | 25632 | 0.89 | 9.24E-02 | transcription_start_site | + | 29431 | 29431 | -3973 | 15795 | AN3451 |
| 3015 | CONTIG58 | 25283 | 25632 | 0.89 | 9.24E-02 | transcription_start_site | + | 29742 | 29742 | -4284 | 15796 | AN3451 |
| 3015 | CONTIG58 | 25283 | 25632 | 0.89 | 9.24E-02 | transcription_start_site | + | 30304 | 30304 | -4846 | 15797 | AN3451 |
| 3015 | CONTIG58 | 25283 | 25632 | 0.89 | 9.24E-02 | transcription_start_site | + | 30481 | 30481 | -5023 | 15798 | AN3451 |
| 944  | CONTIG58 | 74195 | 74534 | 1.96 | 0.00E+00 | transcription_start_site | - | 72216 | 72216 | -2148 | 15848 | AN3466 |
| 944  | CONTIG58 | 74195 | 74534 | 1.96 | 0.00E+00 | transcription_start_site | - | 71995 | 71995 | -2369 | 15849 | AN3466 |
| 944  | CONTIG58 | 74195 | 74534 | 1.96 | 0.00E+00 | transcription_start_site | - | 71888 | 71888 | -2476 | 15850 | AN3466 |
| 944  | CONTIG58 | 74195 | 74534 | 1.96 | 0.00E+00 | transcription_start_site | - | 71768 | 71768 | -2596 | 15851 | AN3466 |
| 944  | CONTIG58 | 74195 | 74534 | 1.96 | 0.00E+00 | transcription_start_site | - | 71651 | 71651 | -2713 | 15852 | AN3466 |
| 944  | CONTIG58 | 74195 | 74534 | 1.96 | 0.00E+00 | transcription_start_site | - | 71238 | 71238 | -3126 | 15853 | AN3466 |
| 944  | CONTIG58 | 74195 | 74534 | 1.96 | 0.00E+00 | transcription_start_site | - | 70797 | 70797 | -3567 | 15854 | AN3466 |
| 944  | CONTIG58 | 74195 | 74534 | 1.96 | 0.00E+00 | transcription_start_site | - | 70684 | 70684 | -3680 | 15855 | AN3466 |
| 944  | CONTIG58 | 74195 | 74534 | 1.96 | 0.00E+00 | transcription_start_site | - | 70576 | 70576 | -3788 | 15856 | AN3466 |
| 944  | CONTIG58 | 74195 | 74534 | 1.96 | 0.00E+00 | transcription_start_site | - | 70453 | 70453 | -3911 | 15857 | AN3466 |
| 944  | CONTIG58 | 74195 | 74534 | 1.96 | 0.00E+00 | transcription_start_site | - | 70318 | 70318 | -4046 | 15858 | AN3466 |
| 944  | CONTIG58 | 74195 | 74534 | 1.96 | 0.00E+00 | transcription_start_site | - | 74049 | 74049 | -315  | 15864 | AN3468 |
| 944  | CONTIG58 | 74195 | 74534 | 1.96 | 0.00E+00 | transcription_start_site | - | 73945 | 73945 | -419  | 15865 | AN3468 |
| 944  | CONTIG58 | 74195 | 74534 | 1.96 | 0.00E+00 | transcription_start_site | - | 73799 | 73799 | -565  | 15866 | AN3468 |

|      |          |       |       |      |          |                          |   |       |       |       |       |        |
|------|----------|-------|-------|------|----------|--------------------------|---|-------|-------|-------|-------|--------|
| 944  | CONTIG58 | 74195 | 74534 | 1.96 | 0.00E+00 | transcription_start_site | - | 73545 | 73545 | -819  | 15867 | AN3468 |
| 944  | CONTIG58 | 74195 | 74534 | 1.96 | 0.00E+00 | transcription_start_site | + | 74691 | 74691 | -326  | 15868 | AN3469 |
| 944  | CONTIG58 | 74195 | 74534 | 1.96 | 0.00E+00 | transcription_start_site | + | 74915 | 74915 | -550  | 15869 | AN3469 |
| 944  | CONTIG58 | 74195 | 74534 | 1.96 | 0.00E+00 | transcription_start_site | + | 75039 | 75039 | -674  | 15870 | AN3469 |
| 944  | CONTIG58 | 74195 | 74534 | 1.96 | 0.00E+00 | transcription_start_site | + | 75173 | 75173 | -808  | 15871 | AN3469 |
| 3024 | CONTIG59 | 13054 | 13418 | 0.87 | 1.93E-01 | transcription_start_site | - | 10492 | 10492 | -2744 | 15890 | AN3473 |
| 3024 | CONTIG59 | 13054 | 13418 | 0.87 | 1.93E-01 | transcription_start_site | - | 12927 | 12927 | -309  | 15891 | AN3474 |
| 3024 | CONTIG59 | 13054 | 13418 | 0.87 | 1.93E-01 | transcription_start_site | + | 17946 | 17946 | -4710 | 15895 | AN3476 |
| 2974 | CONTIG59 | 29029 | 29305 | 0.94 | 1.44E-01 | transcription_start_site | - | 29036 | 29036 | -131  | 15909 | AN3480 |
| 2974 | CONTIG59 | 29029 | 29305 | 0.94 | 1.44E-01 | transcription_start_site | - | 28890 | 28890 | -277  | 15910 | AN3480 |
| 2974 | CONTIG59 | 29029 | 29305 | 0.94 | 1.44E-01 | transcription_start_site | - | 28540 | 28540 | -627  | 15911 | AN3480 |
| 2974 | CONTIG59 | 29029 | 29305 | 0.94 | 1.44E-01 | transcription_start_site | + | 31096 | 31096 | -1929 | 15912 | AN3481 |
| 2974 | CONTIG59 | 29029 | 29305 | 0.94 | 1.44E-01 | transcription_start_site | + | 31312 | 31312 | -2145 | 15913 | AN3481 |
| 2878 | CONTIG59 | 34291 | 34640 | 1.01 | 1.08E-01 | transcription_start_site | - | 33365 | 33365 | -1100 | 15914 | AN3482 |
| 2878 | CONTIG59 | 34291 | 34640 | 1.01 | 1.08E-01 | transcription_start_site | - | 33301 | 33301 | -1164 | 15915 | AN3482 |
| 2878 | CONTIG59 | 34291 | 34640 | 1.01 | 1.08E-01 | transcription_start_site | - | 32393 | 32393 | -2072 | 15916 | AN3482 |
| 1033 | CONTIG59 | 60767 | 61111 | 1.88 | 1.22E-03 | transcription_start_site | + | 60945 | 60945 | -6    | 15933 | AN3489 |
| 1033 | CONTIG59 | 60767 | 61111 | 1.88 | 1.22E-03 | transcription_start_site | + | 61201 | 61201 | -262  | 15934 | AN3489 |
| 1033 | CONTIG59 | 60767 | 61111 | 1.88 | 1.22E-03 | transcription_start_site | + | 61574 | 61574 | -635  | 15935 | AN3489 |
| 1033 | CONTIG59 | 60767 | 61111 | 1.88 | 1.22E-03 | transcription_start_site | + | 63320 | 63320 | -2381 | 15936 | AN3489 |
| 1033 | CONTIG59 | 60767 | 61111 | 1.88 | 1.22E-03 | transcription_start_site | + | 64095 | 64095 | -3156 | 15937 | AN3489 |
| 3005 | CONTIG59 | 62702 | 63881 | 0.91 | 1.50E-01 | transcription_start_site | + | 63320 | 63320 | -28   | 15936 | AN3489 |
| 3005 | CONTIG59 | 62702 | 63881 | 0.91 | 1.50E-01 | transcription_start_site | + | 64095 | 64095 | -803  | 15937 | AN3489 |
| 2431 | CONTIG59 | 69307 | 70419 | 1.22 | 4.36E-02 | transcription_start_site | - | 66389 | 66389 | -3474 | 15938 | AN3490 |
| 2431 | CONTIG59 | 69307 | 70419 | 1.22 | 4.36E-02 | transcription_start_site | - | 66224 | 66224 | -3639 | 15939 | AN3490 |
| 2431 | CONTIG59 | 69307 | 70419 | 1.22 | 4.36E-02 | transcription_start_site | - | 66052 | 66052 | -3811 | 15940 | AN3490 |
| 2431 | CONTIG59 | 69307 | 70419 | 1.22 | 4.36E-02 | transcription_start_site | - | 65639 | 65639 | -4224 | 15941 | AN3490 |
| 2431 | CONTIG59 | 69307 | 70419 | 1.22 | 4.36E-02 | transcription_start_site | - | 65157 | 65157 | -4706 | 15942 | AN3490 |
| 2431 | CONTIG59 | 69307 | 70419 | 1.22 | 4.36E-02 | transcription_start_site | - | 64410 | 64410 | -5453 | 15943 | AN3490 |
| 3005 | CONTIG59 | 62702 | 63881 | 0.91 | 1.50E-01 | transcription_start_site | - | 64231 | 64231 | 939   | 15944 | AN3490 |
| 3005 | CONTIG59 | 62702 | 63881 | 0.91 | 1.50E-01 | transcription_start_site | - | 64410 | 64410 | 1118  | 15943 | AN3490 |
| 3005 | CONTIG59 | 62702 | 63881 | 0.91 | 1.50E-01 | transcription_start_site | + | 67029 | 67029 | -3737 | 15945 | AN3491 |
| 3005 | CONTIG59 | 62702 | 63881 | 0.91 | 1.50E-01 | transcription_start_site | + | 67290 | 67290 | -3998 | 15946 | AN3491 |
| 3005 | CONTIG59 | 62702 | 63881 | 0.91 | 1.50E-01 | transcription_start_site | + | 67537 | 67537 | -4245 | 15947 | AN3491 |
| 3005 | CONTIG59 | 62702 | 63881 | 0.91 | 1.50E-01 | transcription_start_site | + | 68163 | 68163 | -4871 | 15948 | AN3491 |
| 2431 | CONTIG59 | 69307 | 70419 | 1.22 | 4.36E-02 | transcription_start_site | + | 69198 | 69198 | 665   | 15949 | AN3492 |
| 2431 | CONTIG59 | 69307 | 70419 | 1.22 | 4.36E-02 | transcription_start_site | + | 70649 | 70649 | -786  | 15950 | AN3493 |
| 2431 | CONTIG59 | 69307 | 70419 | 1.22 | 4.36E-02 | transcription_start_site | + | 70736 | 70736 | -873  | 15951 | AN3493 |
| 2431 | CONTIG59 | 69307 | 70419 | 1.22 | 4.36E-02 | transcription_start_site | + | 72664 | 72664 | -2801 | 15952 | AN3494 |
| 2553 | CONTIG59 | 93171 | 93520 | 1.18 | 5.22E-02 | transcription_start_site | - | 88430 | 88430 | -4915 | 15957 | AN3497 |
| 2879 | CONTIG59 | 91221 | 91555 | 1.01 | 1.08E-01 | transcription_start_site | - | 88430 | 88430 | -2958 | 15957 | AN3497 |
| 2879 | CONTIG59 | 91221 | 91555 | 1.01 | 1.08E-01 | transcription_start_site | - | 87770 | 87770 | -3618 | 15958 | AN3497 |
| 2553 | CONTIG59 | 93171 | 93520 | 1.18 | 5.22E-02 | transcription_start_site | - | 93116 | 93116 | -229  | 15959 | AN3498 |
| 2553 | CONTIG59 | 93171 | 93520 | 1.18 | 5.22E-02 | transcription_start_site | - | 92664 | 92664 | -681  | 15960 | AN3498 |
| 2553 | CONTIG59 | 93171 | 93520 | 1.18 | 5.22E-02 | transcription_start_site | - | 92516 | 92516 | -829  | 15961 | AN3498 |
| 2553 | CONTIG59 | 93171 | 93520 | 1.18 | 5.22E-02 | transcription_start_site | - | 92059 | 92059 | -1286 | 15962 | AN3498 |
| 2553 | CONTIG59 | 93171 | 93520 | 1.18 | 5.22E-02 | transcription_start_site | - | 91820 | 91820 | -1525 | 15963 | AN3498 |
| 2553 | CONTIG59 | 93171 | 93520 | 1.18 | 5.22E-02 | transcription_start_site | - | 91025 | 91025 | -2320 | 15964 | AN3498 |
| 2553 | CONTIG59 | 93171 | 93520 | 1.18 | 5.22E-02 | transcription_start_site | - | 90445 | 90445 | -2900 | 15965 | AN3498 |
| 2553 | CONTIG59 | 93171 | 93520 | 1.18 | 5.22E-02 | transcription_start_site | - | 90204 | 90204 | -3141 | 15966 | AN3498 |
| 2553 | CONTIG59 | 93171 | 93520 | 1.18 | 5.22E-02 | transcription_start_site | - | 90156 | 90156 | -3189 | 15967 | AN3498 |
| 2879 | CONTIG59 | 91221 | 91555 | 1.01 | 1.08E-01 | transcription_start_site | - | 91025 | 91025 | -363  | 15964 | AN3498 |
| 2879 | CONTIG59 | 91221 | 91555 | 1.01 | 1.08E-01 | transcription_start_site | - | 91820 | 91820 | 432   | 15963 | AN3498 |
| 2879 | CONTIG59 | 91221 | 91555 | 1.01 | 1.08E-01 | transcription_start_site | - | 92059 | 92059 | 671   | 15962 | AN3498 |
| 2879 | CONTIG59 | 91221 | 91555 | 1.01 | 1.08E-01 | transcription_start_site | - | 90445 | 90445 | -943  | 15965 | AN3498 |
| 2879 | CONTIG59 | 91221 | 91555 | 1.01 | 1.08E-01 | transcription_start_site | - | 92516 | 92516 | 1128  | 15961 | AN3498 |
| 2879 | CONTIG59 | 91221 | 91555 | 1.01 | 1.08E-01 | transcription_start_site | - | 90204 | 90204 | -1184 | 15966 | AN3498 |

|               |        |        |      |          |                          |   |        |        |       |       |        |
|---------------|--------|--------|------|----------|--------------------------|---|--------|--------|-------|-------|--------|
| 2879 CONTIG59 | 91221  | 91555  | 1.01 | 1.08E-01 | transcription_start_site | - | 90156  | 90156  | -1232 | 15967 | AN3498 |
| 3007 CONTIG59 | 94366  | 94640  | 0.91 | 1.66E-01 | transcription_start_site | - | 93116  | 93116  | -1387 | 15959 | AN3498 |
| 3007 CONTIG59 | 94366  | 94640  | 0.91 | 1.66E-01 | transcription_start_site | - | 92664  | 92664  | -1839 | 15960 | AN3498 |
| 3007 CONTIG59 | 94366  | 94640  | 0.91 | 1.66E-01 | transcription_start_site | - | 92516  | 92516  | -1987 | 15961 | AN3498 |
| 3007 CONTIG59 | 94366  | 94640  | 0.91 | 1.66E-01 | transcription_start_site | - | 92059  | 92059  | -2444 | 15962 | AN3498 |
| 3007 CONTIG59 | 94366  | 94640  | 0.91 | 1.66E-01 | transcription_start_site | - | 91820  | 91820  | -2683 | 15963 | AN3498 |
| 3007 CONTIG59 | 94366  | 94640  | 0.91 | 1.66E-01 | transcription_start_site | - | 91025  | 91025  | -3478 | 15964 | AN3498 |
| 3007 CONTIG59 | 94366  | 94640  | 0.91 | 1.66E-01 | transcription_start_site | - | 90445  | 90445  | -4058 | 15965 | AN3498 |
| 3007 CONTIG59 | 94366  | 94640  | 0.91 | 1.66E-01 | transcription_start_site | - | 90204  | 90204  | -4299 | 15966 | AN3498 |
| 3007 CONTIG59 | 94366  | 94640  | 0.91 | 1.66E-01 | transcription_start_site | - | 90156  | 90156  | -4347 | 15967 | AN3498 |
| 2553 CONTIG59 | 93171  | 93520  | 1.18 | 5.22E-02 | transcription_start_site | + | 93548  | 93548  | -202  | 15968 | AN3499 |
| 2553 CONTIG59 | 93171  | 93520  | 1.18 | 5.22E-02 | transcription_start_site | + | 93671  | 93671  | -325  | 15969 | AN3499 |
| 2553 CONTIG59 | 93171  | 93520  | 1.18 | 5.22E-02 | transcription_start_site | + | 93796  | 93796  | -450  | 15970 | AN3499 |
| 2879 CONTIG59 | 91221  | 91555  | 1.01 | 1.08E-01 | transcription_start_site | + | 93548  | 93548  | -2160 | 15968 | AN3499 |
| 2879 CONTIG59 | 91221  | 91555  | 1.01 | 1.08E-01 | transcription_start_site | + | 93671  | 93671  | -2283 | 15969 | AN3499 |
| 2879 CONTIG59 | 91221  | 91555  | 1.01 | 1.08E-01 | transcription_start_site | + | 93796  | 93796  | -2408 | 15970 | AN3499 |
| 3007 CONTIG59 | 94366  | 94640  | 0.91 | 1.66E-01 | transcription_start_site | + | 93796  | 93796  | 707   | 15970 | AN3499 |
| 3007 CONTIG59 | 94366  | 94640  | 0.91 | 1.66E-01 | transcription_start_site | + | 93671  | 93671  | 832   | 15969 | AN3499 |
| 3007 CONTIG59 | 94366  | 94640  | 0.91 | 1.66E-01 | transcription_start_site | + | 93548  | 93548  | 955   | 15968 | AN3499 |
| 2553 CONTIG59 | 93171  | 93520  | 1.18 | 5.22E-02 | transcription_start_site | + | 95438  | 95438  | -2092 | 15971 | AN3500 |
| 2553 CONTIG59 | 93171  | 93520  | 1.18 | 5.22E-02 | transcription_start_site | + | 95999  | 95999  | -2653 | 15972 | AN3500 |
| 2553 CONTIG59 | 93171  | 93520  | 1.18 | 5.22E-02 | transcription_start_site | + | 96750  | 96750  | -3404 | 15973 | AN3500 |
| 2553 CONTIG59 | 93171  | 93520  | 1.18 | 5.22E-02 | transcription_start_site | + | 97067  | 97067  | -3721 | 15974 | AN3500 |
| 2553 CONTIG59 | 93171  | 93520  | 1.18 | 5.22E-02 | transcription_start_site | + | 97414  | 97414  | -4068 | 15975 | AN3500 |
| 2879 CONTIG59 | 91221  | 91555  | 1.01 | 1.08E-01 | transcription_start_site | + | 95438  | 95438  | -4050 | 15971 | AN3500 |
| 2879 CONTIG59 | 91221  | 91555  | 1.01 | 1.08E-01 | transcription_start_site | + | 95999  | 95999  | -4611 | 15972 | AN3500 |
| 3007 CONTIG59 | 94366  | 94640  | 0.91 | 1.66E-01 | transcription_start_site | + | 95438  | 95438  | -935  | 15971 | AN3500 |
| 3007 CONTIG59 | 94366  | 94640  | 0.91 | 1.66E-01 | transcription_start_site | + | 95999  | 95999  | -1496 | 15972 | AN3500 |
| 3007 CONTIG59 | 94366  | 94640  | 0.91 | 1.66E-01 | transcription_start_site | + | 96750  | 96750  | -2247 | 15973 | AN3500 |
| 3007 CONTIG59 | 94366  | 94640  | 0.91 | 1.66E-01 | transcription_start_site | + | 97067  | 97067  | -2564 | 15974 | AN3500 |
| 3007 CONTIG59 | 94366  | 94640  | 0.91 | 1.66E-01 | transcription_start_site | + | 97414  | 97414  | -2911 | 15975 | AN3500 |
| 2553 CONTIG59 | 93171  | 93520  | 1.18 | 5.22E-02 | transcription_start_site | + | 97975  | 97975  | -4629 | 15976 | AN3501 |
| 2553 CONTIG59 | 93171  | 93520  | 1.18 | 5.22E-02 | transcription_start_site | + | 98335  | 98335  | -4989 | 15977 | AN3501 |
| 3007 CONTIG59 | 94366  | 94640  | 0.91 | 1.66E-01 | transcription_start_site | + | 97975  | 97975  | -3472 | 15976 | AN3501 |
| 3007 CONTIG59 | 94366  | 94640  | 0.91 | 1.66E-01 | transcription_start_site | + | 98335  | 98335  | -3832 | 15977 | AN3501 |
| 3007 CONTIG59 | 94366  | 94640  | 0.91 | 1.66E-01 | transcription_start_site | + | 98970  | 98970  | -4467 | 15978 | AN3501 |
| 2347 CONTIG59 | 109071 | 109415 | 1.25 | 3.70E-02 | transcription_start_site | - | 105713 | 105713 | -3530 | 15984 | AN3502 |
| 2347 CONTIG59 | 109071 | 109415 | 1.25 | 3.70E-02 | transcription_start_site | - | 105517 | 105517 | -3726 | 15985 | AN3502 |
| 2347 CONTIG59 | 109071 | 109415 | 1.25 | 3.70E-02 | transcription_start_site | - | 105357 | 105357 | -3886 | 15986 | AN3502 |
| 2347 CONTIG59 | 109071 | 109415 | 1.25 | 3.70E-02 | transcription_start_site | - | 104927 | 104927 | -4316 | 15987 | AN3502 |
| 2347 CONTIG59 | 109071 | 109415 | 1.25 | 3.70E-02 | transcription_start_site | - | 104865 | 104865 | -4378 | 15988 | AN3502 |
| 2347 CONTIG59 | 109071 | 109415 | 1.25 | 3.70E-02 | transcription_start_site | - | 104708 | 104708 | -4535 | 15989 | AN3502 |
| 2347 CONTIG59 | 109071 | 109415 | 1.25 | 3.70E-02 | transcription_start_site | - | 104333 | 104333 | -4910 | 15990 | AN3502 |
| 2347 CONTIG59 | 109071 | 109415 | 1.25 | 3.70E-02 | transcription_start_site | - | 104164 | 104164 | -5079 | 15991 | AN3502 |
| 2347 CONTIG59 | 109071 | 109415 | 1.25 | 3.70E-02 | transcription_start_site | - | 104078 | 104078 | -5165 | 15992 | AN3502 |
| 2347 CONTIG59 | 109071 | 109415 | 1.25 | 3.70E-02 | transcription_start_site | - | 108184 | 108184 | -1059 | 15994 | AN3503 |
| 2347 CONTIG59 | 109071 | 109415 | 1.25 | 3.70E-02 | transcription_start_site | - | 107588 | 107588 | -1655 | 15995 | AN3503 |
| 2347 CONTIG59 | 109071 | 109415 | 1.25 | 3.70E-02 | transcription_start_site | - | 107431 | 107431 | -1812 | 15996 | AN3503 |
| 2347 CONTIG59 | 109071 | 109415 | 1.25 | 3.70E-02 | transcription_start_site | - | 107261 | 107261 | -1982 | 15997 | AN3503 |
| 2347 CONTIG59 | 109071 | 109415 | 1.25 | 3.70E-02 | transcription_start_site | - | 107022 | 107022 | -2221 | 15998 | AN3503 |
| 2347 CONTIG59 | 109071 | 109415 | 1.25 | 3.70E-02 | transcription_start_site | - | 106708 | 106708 | -2535 | 15999 | AN3503 |
| 2347 CONTIG59 | 109071 | 109415 | 1.25 | 3.70E-02 | transcription_start_site | - | 106645 | 106645 | -2598 | 16000 | AN3503 |
| 2347 CONTIG59 | 109071 | 109415 | 1.25 | 3.70E-02 | transcription_start_site | - | 106473 | 106473 | -2770 | 16001 | AN3503 |
| 2347 CONTIG59 | 109071 | 109415 | 1.25 | 3.70E-02 | transcription_start_site | - | 106360 | 106360 | -2883 | 16002 | AN3503 |
| 2347 CONTIG59 | 109071 | 109415 | 1.25 | 3.70E-02 | transcription_start_site | - | 106272 | 106272 | -2971 | 16003 | AN3503 |
| 2347 CONTIG59 | 109071 | 109415 | 1.25 | 3.70E-02 | transcription_start_site | + | 108970 | 108970 | 273   | 16004 | AN3504 |
| 2347 CONTIG59 | 109071 | 109415 | 1.25 | 3.70E-02 | transcription_start_site | + | 110563 | 110563 | -1320 | 16005 | AN3504 |

|      |          |        |        |      |          |                          |   |        |        |       |       |        |
|------|----------|--------|--------|------|----------|--------------------------|---|--------|--------|-------|-------|--------|
| 2880 | CONTIG59 | 116330 | 116619 | 1.01 | 1.08E-01 | transcription_start_site | - | 113118 | 113118 | -3356 | 16006 | AN3505 |
| 2880 | CONTIG59 | 116330 | 116619 | 1.01 | 1.08E-01 | transcription_start_site | - | 112917 | 112917 | -3557 | 16007 | AN3505 |
| 2880 | CONTIG59 | 116330 | 116619 | 1.01 | 1.08E-01 | transcription_start_site | - | 112036 | 112036 | -4438 | 16008 | AN3505 |
| 2880 | CONTIG59 | 116330 | 116619 | 1.01 | 1.08E-01 | transcription_start_site | + | 116421 | 116421 | 53    | 16010 | AN3506 |
| 2880 | CONTIG59 | 116330 | 116619 | 1.01 | 1.08E-01 | transcription_start_site | + | 116305 | 116305 | 169   | 16009 | AN3506 |
| 2880 | CONTIG59 | 116330 | 116619 | 1.01 | 1.08E-01 | transcription_start_site | + | 118053 | 118053 | -1578 | 16011 | AN3507 |
| 2880 | CONTIG59 | 116330 | 116619 | 1.01 | 1.08E-01 | transcription_start_site | + | 118274 | 118274 | -1799 | 16012 | AN3507 |
| 2880 | CONTIG59 | 116330 | 116619 | 1.01 | 1.08E-01 | transcription_start_site | + | 118503 | 118503 | -2028 | 16013 | AN3507 |
| 2880 | CONTIG59 | 116330 | 116619 | 1.01 | 1.08E-01 | transcription_start_site | + | 120356 | 120356 | -3881 | 16017 | AN3509 |
| 2880 | CONTIG59 | 116330 | 116619 | 1.01 | 1.08E-01 | transcription_start_site | + | 120835 | 120835 | -4360 | 16018 | AN3509 |
| 2128 | CONTIG59 | 127295 | 127714 | 1.32 | 2.62E-02 | transcription_start_site | - | 123478 | 123478 | -4026 | 16019 | AN3510 |
| 2128 | CONTIG59 | 127295 | 127714 | 1.32 | 2.62E-02 | transcription_start_site | - | 123270 | 123270 | -4234 | 16020 | AN3510 |
| 2946 | CONTIG59 | 128345 | 128829 | 0.97 | 1.07E-01 | transcription_start_site | - | 123478 | 123478 | -5109 | 16019 | AN3510 |
| 996  | CONTIG59 | 130970 | 131229 | 1.91 | 1.01E-03 | transcription_start_site | + | 131150 | 131150 | -50   | 16024 | AN3512 |
| 996  | CONTIG59 | 130970 | 131229 | 1.91 | 1.01E-03 | transcription_start_site | + | 131032 | 131032 | 67    | 16023 | AN3512 |
| 1611 | CONTIG59 | 129530 | 130344 | 1.53 | 1.17E-03 | transcription_start_site | + | 131032 | 131032 | -1095 | 16023 | AN3512 |
| 1611 | CONTIG59 | 129530 | 130344 | 1.53 | 1.17E-03 | transcription_start_site | + | 131150 | 131150 | -1213 | 16024 | AN3512 |
| 2128 | CONTIG59 | 127295 | 127714 | 1.32 | 2.62E-02 | transcription_start_site | + | 131032 | 131032 | -3527 | 16023 | AN3512 |
| 2128 | CONTIG59 | 127295 | 127714 | 1.32 | 2.62E-02 | transcription_start_site | + | 131150 | 131150 | -3645 | 16024 | AN3512 |
| 2881 | CONTIG59 | 131485 | 132069 | 1.01 | 1.08E-01 | transcription_start_site | + | 131150 | 131150 | 627   | 16024 | AN3512 |
| 2881 | CONTIG59 | 131485 | 132069 | 1.01 | 1.08E-01 | transcription_start_site | + | 131032 | 131032 | 745   | 16023 | AN3512 |
| 2946 | CONTIG59 | 128345 | 128829 | 0.97 | 1.07E-01 | transcription_start_site | + | 131032 | 131032 | -2445 | 16023 | AN3512 |
| 2946 | CONTIG59 | 128345 | 128829 | 0.97 | 1.07E-01 | transcription_start_site | + | 131150 | 131150 | -2563 | 16024 | AN3512 |
| 1477 | CONTIG59 | 141757 | 142266 | 1.6  | 6.61E-03 | transcription_start_site | - | 137040 | 137040 | -4971 | 16026 | AN3514 |
| 1477 | CONTIG59 | 141757 | 142266 | 1.6  | 6.61E-03 | transcription_start_site | - | 142326 | 142326 | 314   | 16029 | AN3515 |
| 1513 | CONTIG59 | 150232 | 150523 | 1.57 | 7.85E-03 | transcription_start_site | + | 151148 | 151148 | -770  | 16030 | AN3517 |
| 2554 | CONTIG59 | 153317 | 153581 | 1.18 | 5.22E-02 | transcription_start_site | - | 153766 | 153766 | 317   | 16031 | AN3518 |
| 2554 | CONTIG59 | 153317 | 153581 | 1.18 | 5.22E-02 | transcription_start_site | - | 152735 | 152735 | -714  | 16032 | AN3518 |
| 1513 | CONTIG59 | 150232 | 150523 | 1.57 | 7.85E-03 | transcription_start_site | + | 154219 | 154219 | -3841 | 16033 | AN3519 |
| 1513 | CONTIG59 | 150232 | 150523 | 1.57 | 7.85E-03 | transcription_start_site | + | 154344 | 154344 | -3966 | 16034 | AN3519 |
| 1513 | CONTIG59 | 150232 | 150523 | 1.57 | 7.85E-03 | transcription_start_site | + | 154924 | 154924 | -4546 | 16035 | AN3519 |
| 1513 | CONTIG59 | 150232 | 150523 | 1.57 | 7.85E-03 | transcription_start_site | + | 155182 | 155182 | -4804 | 16036 | AN3519 |
| 1513 | CONTIG59 | 150232 | 150523 | 1.57 | 7.85E-03 | transcription_start_site | + | 155459 | 155459 | -5081 | 16037 | AN3519 |
| 2554 | CONTIG59 | 153317 | 153581 | 1.18 | 5.22E-02 | transcription_start_site | + | 154219 | 154219 | -770  | 16033 | AN3519 |
| 2554 | CONTIG59 | 153317 | 153581 | 1.18 | 5.22E-02 | transcription_start_site | + | 154344 | 154344 | -895  | 16034 | AN3519 |
| 2554 | CONTIG59 | 153317 | 153581 | 1.18 | 5.22E-02 | transcription_start_site | + | 154924 | 154924 | -1475 | 16035 | AN3519 |
| 2554 | CONTIG59 | 153317 | 153581 | 1.18 | 5.22E-02 | transcription_start_site | + | 155182 | 155182 | -1733 | 16036 | AN3519 |
| 2554 | CONTIG59 | 153317 | 153581 | 1.18 | 5.22E-02 | transcription_start_site | + | 155459 | 155459 | -2010 | 16037 | AN3519 |
| 2554 | CONTIG59 | 153317 | 153581 | 1.18 | 5.22E-02 | transcription_start_site | + | 155608 | 155608 | -2159 | 16038 | AN3519 |
| 2554 | CONTIG59 | 153317 | 153581 | 1.18 | 5.22E-02 | transcription_start_site | + | 156003 | 156003 | -2554 | 16039 | AN3519 |
| 2772 | CONTIG59 | 170478 | 170829 | 1.08 | 8.01E-02 | transcription_start_site | - | 169369 | 169369 | -1284 | 16053 | AN3524 |
| 2772 | CONTIG59 | 170478 | 170829 | 1.08 | 8.01E-02 | transcription_start_site | - | 169186 | 169186 | -1467 | 16054 | AN3524 |
| 2772 | CONTIG59 | 170478 | 170829 | 1.08 | 8.01E-02 | transcription_start_site | - | 169000 | 169000 | -1653 | 16055 | AN3524 |
| 859  | CONTIG60 | 11926  | 12225  | 2.04 | 0.00E+00 | transcription_start_site | - | 11641  | 11641  | -434  | 16069 | AN3529 |
| 859  | CONTIG60 | 11926  | 12225  | 2.04 | 0.00E+00 | transcription_start_site | - | 11270  | 11270  | -805  | 16070 | AN3529 |
| 859  | CONTIG60 | 11926  | 12225  | 2.04 | 0.00E+00 | transcription_start_site | + | 13401  | 13401  | -1325 | 16071 | AN3530 |
| 859  | CONTIG60 | 11926  | 12225  | 2.04 | 0.00E+00 | transcription_start_site | + | 13656  | 13656  | -1580 | 16072 | AN3530 |
| 859  | CONTIG60 | 11926  | 12225  | 2.04 | 0.00E+00 | transcription_start_site | + | 13977  | 13977  | -1901 | 16073 | AN3530 |
| 859  | CONTIG60 | 11926  | 12225  | 2.04 | 0.00E+00 | transcription_start_site | + | 14293  | 14293  | -2217 | 16074 | AN3530 |
| 859  | CONTIG60 | 11926  | 12225  | 2.04 | 0.00E+00 | transcription_start_site | + | 14473  | 14473  | -2397 | 16075 | AN3530 |
| 859  | CONTIG60 | 11926  | 12225  | 2.04 | 0.00E+00 | transcription_start_site | + | 15993  | 15993  | -3917 | 16076 | AN3531 |
| 3042 | CONTIG60 | 40743  | 41087  | 0.78 | 1.44E-01 | transcription_start_site | - | 37757  | 37757  | -3158 | 16088 | AN3536 |
| 3042 | CONTIG60 | 40743  | 41087  | 0.78 | 1.44E-01 | transcription_start_site | - | 37628  | 37628  | -3287 | 16089 | AN3536 |
| 3042 | CONTIG60 | 40743  | 41087  | 0.78 | 1.44E-01 | transcription_start_site | - | 37380  | 37380  | -3535 | 16090 | AN3536 |
| 3042 | CONTIG60 | 40743  | 41087  | 0.78 | 1.44E-01 | transcription_start_site | - | 36844  | 36844  | -4071 | 16091 | AN3536 |
| 3042 | CONTIG60 | 40743  | 41087  | 0.78 | 1.44E-01 | transcription_start_site | - | 36563  | 36563  | -4352 | 16092 | AN3536 |
| 3042 | CONTIG60 | 40743  | 41087  | 0.78 | 1.44E-01 | transcription_start_site | + | 41098  | 41098  | -183  | 16096 | AN3538 |



|               |        |        |      |          |                          |   |        |        |       |       |        |
|---------------|--------|--------|------|----------|--------------------------|---|--------|--------|-------|-------|--------|
| 2594 CONTIG61 | 33093  | 33357  | 1.17 | 1.66E-01 | transcription_start_site | - | 28349  | 28349  | -4876 | 16131 | AN3549 |
| 2594 CONTIG61 | 33093  | 33357  | 1.17 | 1.66E-01 | transcription_start_site | - | 28237  | 28237  | -4988 | 16132 | AN3549 |
| 1920 CONTIG61 | 38185  | 38679  | 1.4  | 6.16E-02 | transcription_start_site | - | 36581  | 36581  | -1851 | 16149 | AN3552 |
| 1920 CONTIG61 | 38185  | 38679  | 1.4  | 6.16E-02 | transcription_start_site | - | 38836  | 38836  | 404   | 16150 | AN3553 |
| 1920 CONTIG61 | 38185  | 38679  | 1.4  | 6.16E-02 | transcription_start_site | + | 39553  | 39553  | -1121 | 16151 | AN3554 |
| 1920 CONTIG61 | 38185  | 38679  | 1.4  | 6.16E-02 | transcription_start_site | + | 42257  | 42257  | -3825 | 16152 | AN3554 |
| 468 CONTIG61  | 73355  | 74154  | 2.48 | 1.01E-03 | transcription_start_site | - | 71987  | 71987  | -1767 | 16192 | AN3564 |
| 468 CONTIG61  | 73355  | 74154  | 2.48 | 1.01E-03 | transcription_start_site | - | 71884  | 71884  | -1870 | 16193 | AN3564 |
| 468 CONTIG61  | 73355  | 74154  | 2.48 | 1.01E-03 | transcription_start_site | - | 71495  | 71495  | -2259 | 16194 | AN3564 |
| 468 CONTIG61  | 73355  | 74154  | 2.48 | 1.01E-03 | transcription_start_site | - | 70896  | 70896  | -2858 | 16195 | AN3564 |
| 468 CONTIG61  | 73355  | 74154  | 2.48 | 1.01E-03 | transcription_start_site | + | 72892  | 72892  | 862   | 16197 | AN3565 |
| 468 CONTIG61  | 73355  | 74154  | 2.48 | 1.01E-03 | transcription_start_site | + | 73753  | 73753  | 1     | 16198 | AN3566 |
| 603 CONTIG61  | 98853  | 99150  | 2.3  | 2.22E-03 | transcription_start_site | - | 95057  | 95057  | -3944 | 16219 | AN3572 |
| 603 CONTIG61  | 98853  | 99150  | 2.3  | 2.22E-03 | transcription_start_site | - | 94977  | 94977  | -4024 | 16220 | AN3572 |
| 603 CONTIG61  | 98853  | 99150  | 2.3  | 2.22E-03 | transcription_start_site | - | 98737  | 98737  | -264  | 16231 | AN3574 |
| 603 CONTIG61  | 98853  | 99150  | 2.3  | 2.22E-03 | transcription_start_site | - | 99406  | 99406  | 404   | 16230 | AN3574 |
| 603 CONTIG61  | 98853  | 99150  | 2.3  | 2.22E-03 | transcription_start_site | - | 99485  | 99485  | 483   | 16229 | AN3574 |
| 603 CONTIG61  | 98853  | 99150  | 2.3  | 2.22E-03 | transcription_start_site | - | 99772  | 99772  | 770   | 16228 | AN3574 |
| 603 CONTIG61  | 98853  | 99150  | 2.3  | 2.22E-03 | transcription_start_site | - | 100077 | 100077 | 1075  | 16227 | AN3574 |
| 603 CONTIG61  | 98853  | 99150  | 2.3  | 2.22E-03 | transcription_start_site | + | 101626 | 101626 | -2624 | 16232 | AN3575 |
| 603 CONTIG61  | 98853  | 99150  | 2.3  | 2.22E-03 | transcription_start_site | + | 101779 | 101779 | -2777 | 16233 | AN3575 |
| 603 CONTIG61  | 98853  | 99150  | 2.3  | 2.22E-03 | transcription_start_site | + | 102179 | 102179 | -3177 | 16234 | AN3575 |
| 603 CONTIG61  | 98853  | 99150  | 2.3  | 2.22E-03 | transcription_start_site | + | 102968 | 102968 | -3966 | 16235 | AN3575 |
| 1507 CONTIG61 | 118951 | 119235 | 1.58 | 4.36E-02 | transcription_start_site | - | 118847 | 118847 | -246  | 16249 | AN3581 |
| 1507 CONTIG61 | 118951 | 119235 | 1.58 | 4.36E-02 | transcription_start_site | - | 118740 | 118740 | -353  | 16250 | AN3581 |
| 1273 CONTIG61 | 135610 | 135959 | 1.71 | 2.62E-02 | transcription_start_site | - | 131776 | 131776 | -4008 | 16261 | AN3585 |
| 1273 CONTIG61 | 135610 | 135959 | 1.71 | 2.62E-02 | transcription_start_site | - | 131350 | 131350 | -4434 | 16262 | AN3585 |
| 1715 CONTIG61 | 133360 | 134079 | 1.49 | 3.99E-02 | transcription_start_site | - | 131776 | 131776 | -1943 | 16261 | AN3585 |
| 1715 CONTIG61 | 133360 | 134079 | 1.49 | 3.99E-02 | transcription_start_site | - | 131350 | 131350 | -2369 | 16262 | AN3585 |
| 1826 CONTIG61 | 136365 | 137394 | 1.44 | 5.05E-02 | transcription_start_site | - | 131776 | 131776 | -5103 | 16261 | AN3585 |
| 1715 CONTIG61 | 133360 | 134079 | 1.49 | 3.99E-02 | transcription_start_site | + | 133134 | 133134 | 585   | 16264 | AN3586 |
| 1715 CONTIG61 | 133360 | 134079 | 1.49 | 3.99E-02 | transcription_start_site | + | 132891 | 132891 | 828   | 16263 | AN3586 |
| 1273 CONTIG61 | 135610 | 135959 | 1.71 | 2.62E-02 | transcription_start_site | + | 137531 | 137531 | -1746 | 16265 | AN3587 |
| 1273 CONTIG61 | 135610 | 135959 | 1.71 | 2.62E-02 | transcription_start_site | + | 137760 | 137760 | -1975 | 16266 | AN3587 |
| 1273 CONTIG61 | 135610 | 135959 | 1.71 | 2.62E-02 | transcription_start_site | + | 137967 | 137967 | -2182 | 16267 | AN3587 |
| 1273 CONTIG61 | 135610 | 135959 | 1.71 | 2.62E-02 | transcription_start_site | + | 138035 | 138035 | -2250 | 16268 | AN3587 |
| 1715 CONTIG61 | 133360 | 134079 | 1.49 | 3.99E-02 | transcription_start_site | + | 137531 | 137531 | -3811 | 16265 | AN3587 |
| 1715 CONTIG61 | 133360 | 134079 | 1.49 | 3.99E-02 | transcription_start_site | + | 137760 | 137760 | -4040 | 16266 | AN3587 |
| 1715 CONTIG61 | 133360 | 134079 | 1.49 | 3.99E-02 | transcription_start_site | + | 137967 | 137967 | -4247 | 16267 | AN3587 |
| 1715 CONTIG61 | 133360 | 134079 | 1.49 | 3.99E-02 | transcription_start_site | + | 138035 | 138035 | -4315 | 16268 | AN3587 |
| 1826 CONTIG61 | 136365 | 137394 | 1.44 | 5.05E-02 | transcription_start_site | + | 137531 | 137531 | -651  | 16265 | AN3587 |
| 1826 CONTIG61 | 136365 | 137394 | 1.44 | 5.05E-02 | transcription_start_site | + | 137760 | 137760 | -880  | 16266 | AN3587 |
| 1826 CONTIG61 | 136365 | 137394 | 1.44 | 5.05E-02 | transcription_start_site | + | 137967 | 137967 | -1087 | 16267 | AN3587 |
| 1826 CONTIG61 | 136365 | 137394 | 1.44 | 5.05E-02 | transcription_start_site | + | 138035 | 138035 | -1155 | 16268 | AN3587 |
| 1826 CONTIG61 | 136365 | 137394 | 1.44 | 5.05E-02 | transcription_start_site | + | 141977 | 141977 | -5097 | 16269 | AN3588 |
| 1826 CONTIG61 | 136365 | 137394 | 1.44 | 5.05E-02 | transcription_start_site | + | 142372 | 142372 | -5492 | 16270 | AN3588 |
| 163 CONTIG61  | 149335 | 149679 | 3.02 | 0.00E+00 | transcription_start_site | - | 145513 | 145513 | -3994 | 16271 | AN3589 |
| 163 CONTIG61  | 149335 | 149679 | 3.02 | 0.00E+00 | transcription_start_site | - | 145421 | 145421 | -4086 | 16272 | AN3589 |
| 163 CONTIG61  | 149335 | 149679 | 3.02 | 0.00E+00 | transcription_start_site | - | 145311 | 145311 | -4196 | 16273 | AN3589 |
| 1720 CONTIG61 | 144540 | 144804 | 1.49 | 5.88E-02 | transcription_start_site | - | 145311 | 145311 | 639   | 16273 | AN3589 |
| 1720 CONTIG61 | 144540 | 144804 | 1.49 | 5.88E-02 | transcription_start_site | - | 145421 | 145421 | 749   | 16272 | AN3589 |
| 1720 CONTIG61 | 144540 | 144804 | 1.49 | 5.88E-02 | transcription_start_site | - | 145513 | 145513 | 841   | 16271 | AN3589 |
| 1720 CONTIG61 | 144540 | 144804 | 1.49 | 5.88E-02 | transcription_start_site | + | 146344 | 146344 | -1672 | 16274 | AN3590 |
| 1720 CONTIG61 | 144540 | 144804 | 1.49 | 5.88E-02 | transcription_start_site | + | 146509 | 146509 | -1837 | 16275 | AN3590 |
| 1720 CONTIG61 | 144540 | 144804 | 1.49 | 5.88E-02 | transcription_start_site | + | 146619 | 146619 | -1947 | 16276 | AN3590 |
| 1720 CONTIG61 | 144540 | 144804 | 1.49 | 5.88E-02 | transcription_start_site | + | 147136 | 147136 | -2464 | 16277 | AN3590 |
| 163 CONTIG61  | 149335 | 149679 | 3.02 | 0.00E+00 | transcription_start_site | - | 149192 | 149192 | -315  | 16278 | AN3591 |

|      |          |        |        |      |          |                          |   |        |        |       |       |        |
|------|----------|--------|--------|------|----------|--------------------------|---|--------|--------|-------|-------|--------|
| 163  | CONTIG61 | 149335 | 149679 | 3.02 | 0.00E+00 | transcription_start_site | - | 148587 | 148587 | -920  | 16279 | AN3591 |
| 163  | CONTIG61 | 149335 | 149679 | 3.02 | 0.00E+00 | transcription_start_site | + | 153263 | 153263 | -3756 | 16285 | AN3593 |
| 163  | CONTIG61 | 149335 | 149679 | 3.02 | 0.00E+00 | transcription_start_site | + | 153469 | 153469 | -3962 | 16286 | AN3593 |
| 163  | CONTIG61 | 149335 | 149679 | 3.02 | 0.00E+00 | transcription_start_site | + | 153996 | 153996 | -4489 | 16287 | AN3593 |
| 163  | CONTIG61 | 149335 | 149679 | 3.02 | 0.00E+00 | transcription_start_site | + | 154612 | 154612 | -5105 | 16288 | AN3594 |
| 604  | CONTIG61 | 164410 | 164839 | 2.3  | 2.22E-03 | transcription_start_site | - | 162305 | 162305 | -2319 | 16297 | AN3597 |
| 604  | CONTIG61 | 164410 | 164839 | 2.3  | 2.22E-03 | transcription_start_site | - | 161268 | 161268 | -3356 | 16298 | AN3597 |
| 604  | CONTIG61 | 164410 | 164839 | 2.3  | 2.22E-03 | transcription_start_site | - | 160508 | 160508 | -4116 | 16299 | AN3597 |
| 604  | CONTIG61 | 164410 | 164839 | 2.3  | 2.22E-03 | transcription_start_site | - | 165596 | 165596 | 971   | 16303 | AN3598 |
| 604  | CONTIG61 | 164410 | 164839 | 2.3  | 2.22E-03 | transcription_start_site | - | 165688 | 165688 | 1063  | 16302 | AN3598 |
| 604  | CONTIG61 | 164410 | 164839 | 2.3  | 2.22E-03 | transcription_start_site | - | 165828 | 165828 | 1203  | 16301 | AN3598 |
| 1195 | CONTIG61 | 170410 | 171212 | 1.76 | 1.05E-02 | transcription_start_site | - | 166131 | 166131 | -4680 | 16300 | AN3598 |
| 1195 | CONTIG61 | 170410 | 171212 | 1.76 | 1.05E-02 | transcription_start_site | - | 165828 | 165828 | -4983 | 16301 | AN3598 |
| 1195 | CONTIG61 | 170410 | 171212 | 1.76 | 1.05E-02 | transcription_start_site | - | 165688 | 165688 | -5123 | 16302 | AN3598 |
| 1195 | CONTIG61 | 170410 | 171212 | 1.76 | 1.05E-02 | transcription_start_site | - | 165596 | 165596 | -5215 | 16303 | AN3598 |
| 1721 | CONTIG61 | 169735 | 170019 | 1.49 | 5.88E-02 | transcription_start_site | - | 166131 | 166131 | -3746 | 16300 | AN3598 |
| 1721 | CONTIG61 | 169735 | 170019 | 1.49 | 5.88E-02 | transcription_start_site | - | 165828 | 165828 | -4049 | 16301 | AN3598 |
| 1721 | CONTIG61 | 169735 | 170019 | 1.49 | 5.88E-02 | transcription_start_site | - | 165688 | 165688 | -4189 | 16302 | AN3598 |
| 1721 | CONTIG61 | 169735 | 170019 | 1.49 | 5.88E-02 | transcription_start_site | - | 165596 | 165596 | -4281 | 16303 | AN3598 |
| 114  | CONTIG61 | 171243 | 171593 | 3.16 | 0.00E+00 | transcription_start_site | - | 167717 | 167717 | -3701 | 16304 | AN3599 |
| 114  | CONTIG61 | 171243 | 171593 | 3.16 | 0.00E+00 | transcription_start_site | - | 167273 | 167273 | -4145 | 16305 | AN3599 |
| 114  | CONTIG61 | 171243 | 171593 | 3.16 | 0.00E+00 | transcription_start_site | - | 167156 | 167156 | -4262 | 16306 | AN3599 |
| 114  | CONTIG61 | 171243 | 171593 | 3.16 | 0.00E+00 | transcription_start_site | - | 166919 | 166919 | -4499 | 16307 | AN3599 |
| 1195 | CONTIG61 | 170410 | 171212 | 1.76 | 1.05E-02 | transcription_start_site | - | 167717 | 167717 | -3094 | 16304 | AN3599 |
| 1195 | CONTIG61 | 170410 | 171212 | 1.76 | 1.05E-02 | transcription_start_site | - | 167273 | 167273 | -3538 | 16305 | AN3599 |
| 1195 | CONTIG61 | 170410 | 171212 | 1.76 | 1.05E-02 | transcription_start_site | - | 167156 | 167156 | -3655 | 16306 | AN3599 |
| 1195 | CONTIG61 | 170410 | 171212 | 1.76 | 1.05E-02 | transcription_start_site | - | 166919 | 166919 | -3892 | 16307 | AN3599 |
| 1721 | CONTIG61 | 169735 | 170019 | 1.49 | 5.88E-02 | transcription_start_site | - | 167717 | 167717 | -2160 | 16304 | AN3599 |
| 1721 | CONTIG61 | 169735 | 170019 | 1.49 | 5.88E-02 | transcription_start_site | - | 167273 | 167273 | -2604 | 16305 | AN3599 |
| 1721 | CONTIG61 | 169735 | 170019 | 1.49 | 5.88E-02 | transcription_start_site | - | 167156 | 167156 | -2721 | 16306 | AN3599 |
| 1721 | CONTIG61 | 169735 | 170019 | 1.49 | 5.88E-02 | transcription_start_site | - | 166919 | 166919 | -2958 | 16307 | AN3599 |
| 114  | CONTIG61 | 171243 | 171593 | 3.16 | 0.00E+00 | transcription_start_site | - | 170064 | 170064 | -1354 | 16308 | AN3600 |
| 1023 | CONTIG61 | 174688 | 175252 | 1.89 | 1.30E-02 | transcription_start_site | - | 170064 | 170064 | -4906 | 16308 | AN3600 |
| 1195 | CONTIG61 | 170410 | 171212 | 1.76 | 1.05E-02 | transcription_start_site | - | 170064 | 170064 | -747  | 16308 | AN3600 |
| 1721 | CONTIG61 | 169735 | 170019 | 1.49 | 5.88E-02 | transcription_start_site | - | 170064 | 170064 | 187   | 16308 | AN3600 |
| 1023 | CONTIG61 | 174688 | 175252 | 1.89 | 1.30E-02 | transcription_start_site | - | 173220 | 173220 | -1750 | 16309 | AN3601 |
| 1023 | CONTIG61 | 174688 | 175252 | 1.89 | 1.30E-02 | transcription_start_site | - | 172946 | 172946 | -2024 | 16310 | AN3601 |
| 114  | CONTIG61 | 171243 | 171593 | 3.16 | 0.00E+00 | transcription_start_site | + | 175146 | 175146 | -3728 | 16311 | AN3602 |
| 114  | CONTIG61 | 171243 | 171593 | 3.16 | 0.00E+00 | transcription_start_site | + | 176054 | 176054 | -4636 | 16312 | AN3602 |
| 1023 | CONTIG61 | 174688 | 175252 | 1.89 | 1.30E-02 | transcription_start_site | + | 175146 | 175146 | -176  | 16311 | AN3602 |
| 1023 | CONTIG61 | 174688 | 175252 | 1.89 | 1.30E-02 | transcription_start_site | + | 176054 | 176054 | -1084 | 16312 | AN3602 |
| 1195 | CONTIG61 | 170410 | 171212 | 1.76 | 1.05E-02 | transcription_start_site | + | 175146 | 175146 | -4335 | 16311 | AN3602 |
| 1195 | CONTIG61 | 170410 | 171212 | 1.76 | 1.05E-02 | transcription_start_site | + | 176054 | 176054 | -5243 | 16312 | AN3602 |
| 1508 | CONTIG61 | 189154 | 189445 | 1.58 | 4.36E-02 | transcription_start_site | - | 185071 | 185071 | -4228 | 16315 | AN3605 |
| 1508 | CONTIG61 | 189154 | 189445 | 1.58 | 4.36E-02 | transcription_start_site | - | 184821 | 184821 | -4478 | 16316 | AN3605 |
| 1508 | CONTIG61 | 189154 | 189445 | 1.58 | 4.36E-02 | transcription_start_site | - | 184375 | 184375 | -4924 | 16317 | AN3605 |
| 1508 | CONTIG61 | 189154 | 189445 | 1.58 | 4.36E-02 | transcription_start_site | - | 189220 | 189220 | -79   | 16322 | AN3607 |
| 1508 | CONTIG61 | 189154 | 189445 | 1.58 | 4.36E-02 | transcription_start_site | - | 187902 | 187902 | -1397 | 16323 | AN3607 |
| 2167 | CONTIG61 | 252459 | 252878 | 1.31 | 1.08E-01 | transcription_start_site | - | 249995 | 249995 | -2673 | 16356 | AN3620 |
| 2167 | CONTIG61 | 252459 | 252878 | 1.31 | 1.08E-01 | transcription_start_site | + | 251607 | 251607 | 1061  | 16361 | AN3621 |
| 2167 | CONTIG61 | 252459 | 252878 | 1.31 | 1.08E-01 | transcription_start_site | + | 253369 | 253369 | -700  | 16362 | AN3622 |
| 2167 | CONTIG61 | 252459 | 252878 | 1.31 | 1.08E-01 | transcription_start_site | + | 253598 | 253598 | -929  | 16363 | AN3622 |
| 2167 | CONTIG61 | 252459 | 252878 | 1.31 | 1.08E-01 | transcription_start_site | + | 254371 | 254371 | -1702 | 16364 | AN3622 |
| 2167 | CONTIG61 | 252459 | 252878 | 1.31 | 1.08E-01 | transcription_start_site | + | 257428 | 257428 | -4759 | 16366 | AN3624 |
| 1269 | CONTIG61 | 264468 | 264802 | 1.71 | 1.44E-02 | transcription_start_site | - | 262925 | 262925 | -1710 | 16367 | AN3625 |
| 1269 | CONTIG61 | 264468 | 264802 | 1.71 | 1.44E-02 | transcription_start_site | - | 262231 | 262231 | -2404 | 16368 | AN3625 |
| 1269 | CONTIG61 | 264468 | 264802 | 1.71 | 1.44E-02 | transcription_start_site | - | 261973 | 261973 | -2662 | 16369 | AN3625 |

|      |          |        |        |      |          |                          |   |        |        |       |       |        |
|------|----------|--------|--------|------|----------|--------------------------|---|--------|--------|-------|-------|--------|
| 1269 | CONTIG61 | 264468 | 264802 | 1.71 | 1.44E-02 | transcription_start_site | + | 264300 | 264300 | 335   | 16372 | AN3626 |
| 1269 | CONTIG61 | 264468 | 264802 | 1.71 | 1.44E-02 | transcription_start_site | + | 264160 | 264160 | 475   | 16371 | AN3626 |
| 1269 | CONTIG61 | 264468 | 264802 | 1.71 | 1.44E-02 | transcription_start_site | + | 265351 | 265351 | -716  | 16373 | AN3626 |
| 1269 | CONTIG61 | 264468 | 264802 | 1.71 | 1.44E-02 | transcription_start_site | + | 263643 | 263643 | 992   | 16370 | AN3626 |
| 630  | CONTIG61 | 269118 | 269767 | 2.26 | 0.00E+00 | transcription_start_site | - | 268847 | 268847 | -595  | 16374 | AN3627 |
| 630  | CONTIG61 | 269118 | 269767 | 2.26 | 0.00E+00 | transcription_start_site | - | 268672 | 268672 | -770  | 16375 | AN3627 |
| 630  | CONTIG61 | 269118 | 269767 | 2.26 | 0.00E+00 | transcription_start_site | - | 268294 | 268294 | -1148 | 16376 | AN3627 |
| 630  | CONTIG61 | 269118 | 269767 | 2.26 | 0.00E+00 | transcription_start_site | - | 268047 | 268047 | -1395 | 16377 | AN3627 |
| 630  | CONTIG61 | 269118 | 269767 | 2.26 | 0.00E+00 | transcription_start_site | - | 267725 | 267725 | -1717 | 16378 | AN3627 |
| 630  | CONTIG61 | 269118 | 269767 | 2.26 | 0.00E+00 | transcription_start_site | - | 267535 | 267535 | -1907 | 16379 | AN3627 |
| 630  | CONTIG61 | 269118 | 269767 | 2.26 | 0.00E+00 | transcription_start_site | - | 267348 | 267348 | -2094 | 16380 | AN3627 |
| 630  | CONTIG61 | 269118 | 269767 | 2.26 | 0.00E+00 | transcription_start_site | - | 270516 | 270516 | 1073  | 16383 | AN3628 |
| 1426 | CONTIG61 | 279758 | 280027 | 1.62 | 3.70E-02 | transcription_start_site | - | 279875 | 279875 | -17   | 16389 | AN3631 |
| 1426 | CONTIG61 | 279758 | 280027 | 1.62 | 3.70E-02 | transcription_start_site | - | 280614 | 280614 | 721   | 16388 | AN3631 |
| 1073 | CONTIG61 | 291833 | 292267 | 1.85 | 1.57E-02 | transcription_start_site | - | 288737 | 288737 | -3313 | 16395 | AN3634 |
| 1073 | CONTIG61 | 291833 | 292267 | 1.85 | 1.57E-02 | transcription_start_site | - | 288353 | 288353 | -3697 | 16396 | AN3634 |
| 1073 | CONTIG61 | 291833 | 292267 | 1.85 | 1.57E-02 | transcription_start_site | - | 291888 | 291888 | -162  | 16398 | AN3636 |
| 1073 | CONTIG61 | 291833 | 292267 | 1.85 | 1.57E-02 | transcription_start_site | + | 292440 | 292440 | -390  | 16399 | AN3637 |
| 1073 | CONTIG61 | 291833 | 292267 | 1.85 | 1.57E-02 | transcription_start_site | + | 292616 | 292616 | -566  | 16400 | AN3637 |
| 1073 | CONTIG61 | 291833 | 292267 | 1.85 | 1.57E-02 | transcription_start_site | + | 292774 | 292774 | -724  | 16401 | AN3637 |
| 1073 | CONTIG61 | 291833 | 292267 | 1.85 | 1.57E-02 | transcription_start_site | + | 294209 | 294209 | -2159 | 16402 | AN3637 |
| 1722 | CONTIG61 | 300021 | 300730 | 1.49 | 5.88E-02 | transcription_start_site | - | 295628 | 295628 | -4747 | 16403 | AN3638 |
| 1722 | CONTIG61 | 300021 | 300730 | 1.49 | 5.88E-02 | transcription_start_site | - | 295341 | 295341 | -5034 | 16404 | AN3638 |
| 1073 | CONTIG61 | 291833 | 292267 | 1.85 | 1.57E-02 | transcription_start_site | + | 296255 | 296255 | -4205 | 16405 | AN3639 |
| 1073 | CONTIG61 | 291833 | 292267 | 1.85 | 1.57E-02 | transcription_start_site | + | 296527 | 296527 | -4477 | 16406 | AN3639 |
| 1073 | CONTIG61 | 291833 | 292267 | 1.85 | 1.57E-02 | transcription_start_site | + | 296684 | 296684 | -4634 | 16407 | AN3639 |
| 1073 | CONTIG61 | 291833 | 292267 | 1.85 | 1.57E-02 | transcription_start_site | + | 296812 | 296812 | -4762 | 16408 | AN3639 |
| 1722 | CONTIG61 | 300021 | 300730 | 1.49 | 5.88E-02 | transcription_start_site | - | 300911 | 300911 | 535   | 16409 | AN3640 |
| 2168 | CONTIG61 | 302867 | 303141 | 1.31 | 1.08E-01 | transcription_start_site | - | 300911 | 300911 | -2093 | 16409 | AN3640 |
| 2691 | CONTIG61 | 303457 | 304336 | 1.13 | 1.93E-01 | transcription_start_site | - | 300911 | 300911 | -2985 | 16409 | AN3640 |
| 1723 | CONTIG61 | 306827 | 307191 | 1.49 | 5.88E-02 | transcription_start_site | - | 303271 | 303271 | -3738 | 16410 | AN3641 |
| 1723 | CONTIG61 | 306827 | 307191 | 1.49 | 5.88E-02 | transcription_start_site | - | 302943 | 302943 | -4066 | 16411 | AN3641 |
| 2168 | CONTIG61 | 302867 | 303141 | 1.31 | 1.08E-01 | transcription_start_site | - | 302943 | 302943 | -61   | 16411 | AN3641 |
| 2168 | CONTIG61 | 302867 | 303141 | 1.31 | 1.08E-01 | transcription_start_site | - | 303271 | 303271 | 267   | 16410 | AN3641 |
| 2691 | CONTIG61 | 303457 | 304336 | 1.13 | 1.93E-01 | transcription_start_site | - | 303271 | 303271 | -625  | 16410 | AN3641 |
| 2691 | CONTIG61 | 303457 | 304336 | 1.13 | 1.93E-01 | transcription_start_site | - | 302943 | 302943 | -953  | 16411 | AN3641 |
| 1722 | CONTIG61 | 300021 | 300730 | 1.49 | 5.88E-02 | transcription_start_site | + | 305580 | 305580 | -5204 | 16412 | AN3642 |
| 1723 | CONTIG61 | 306827 | 307191 | 1.49 | 5.88E-02 | transcription_start_site | + | 307095 | 307095 | -86   | 16416 | AN3642 |
| 1723 | CONTIG61 | 306827 | 307191 | 1.49 | 5.88E-02 | transcription_start_site | + | 306569 | 306569 | 440   | 16415 | AN3642 |
| 1723 | CONTIG61 | 306827 | 307191 | 1.49 | 5.88E-02 | transcription_start_site | + | 306427 | 306427 | 582   | 16414 | AN3642 |
| 1723 | CONTIG61 | 306827 | 307191 | 1.49 | 5.88E-02 | transcription_start_site | + | 305899 | 305899 | 1110  | 16413 | AN3642 |
| 2168 | CONTIG61 | 302867 | 303141 | 1.31 | 1.08E-01 | transcription_start_site | + | 305580 | 305580 | -2576 | 16412 | AN3642 |
| 2168 | CONTIG61 | 302867 | 303141 | 1.31 | 1.08E-01 | transcription_start_site | + | 305899 | 305899 | -2895 | 16413 | AN3642 |
| 2168 | CONTIG61 | 302867 | 303141 | 1.31 | 1.08E-01 | transcription_start_site | + | 306427 | 306427 | -3423 | 16414 | AN3642 |
| 2168 | CONTIG61 | 302867 | 303141 | 1.31 | 1.08E-01 | transcription_start_site | + | 306569 | 306569 | -3565 | 16415 | AN3642 |
| 2168 | CONTIG61 | 302867 | 303141 | 1.31 | 1.08E-01 | transcription_start_site | + | 307095 | 307095 | -4091 | 16416 | AN3642 |
| 2691 | CONTIG61 | 303457 | 304336 | 1.13 | 1.93E-01 | transcription_start_site | + | 305580 | 305580 | -1683 | 16412 | AN3642 |
| 2691 | CONTIG61 | 303457 | 304336 | 1.13 | 1.93E-01 | transcription_start_site | + | 305899 | 305899 | -2002 | 16413 | AN3642 |
| 2691 | CONTIG61 | 303457 | 304336 | 1.13 | 1.93E-01 | transcription_start_site | + | 306427 | 306427 | -2530 | 16414 | AN3642 |
| 2691 | CONTIG61 | 303457 | 304336 | 1.13 | 1.93E-01 | transcription_start_site | + | 306569 | 306569 | -2672 | 16415 | AN3642 |
| 2691 | CONTIG61 | 303457 | 304336 | 1.13 | 1.93E-01 | transcription_start_site | + | 307095 | 307095 | -3198 | 16416 | AN3642 |
| 2692 | CONTIG61 | 333242 | 333581 | 1.13 | 1.93E-01 | transcription_start_site | - | 333668 | 333668 | 256   | 16446 | AN3651 |
| 2692 | CONTIG61 | 333242 | 333581 | 1.13 | 1.93E-01 | transcription_start_site | - | 334036 | 334036 | 624   | 16445 | AN3651 |
| 2692 | CONTIG61 | 333242 | 333581 | 1.13 | 1.93E-01 | transcription_start_site | - | 334229 | 334229 | 817   | 16444 | AN3651 |
| 2692 | CONTIG61 | 333242 | 333581 | 1.13 | 1.93E-01 | transcription_start_site | + | 334587 | 334587 | -1175 | 16447 | AN3652 |
| 2692 | CONTIG61 | 333242 | 333581 | 1.13 | 1.93E-01 | transcription_start_site | + | 335056 | 335056 | -1644 | 16448 | AN3652 |
| 2692 | CONTIG61 | 333242 | 333581 | 1.13 | 1.93E-01 | transcription_start_site | + | 335170 | 335170 | -1758 | 16449 | AN3652 |

|      |          |        |        |      |          |                          |   |        |        |       |       |        |
|------|----------|--------|--------|------|----------|--------------------------|---|--------|--------|-------|-------|--------|
| 2692 | CONTIG61 | 333242 | 333581 | 1.13 | 1.93E-01 | transcription_start_site | + | 335324 | 335324 | -1912 | 16450 | AN3652 |
| 2692 | CONTIG61 | 333242 | 333581 | 1.13 | 1.93E-01 | transcription_start_site | + | 335515 | 335515 | -2103 | 16451 | AN3652 |
| 2692 | CONTIG61 | 333242 | 333581 | 1.13 | 1.93E-01 | transcription_start_site | + | 335927 | 335927 | -2515 | 16452 | AN3652 |
| 1427 | CONTIG61 | 346503 | 346867 | 1.62 | 3.70E-02 | transcription_start_site | - | 341507 | 341507 | -5178 | 16456 | AN3654 |
| 1427 | CONTIG61 | 346503 | 346867 | 1.62 | 3.70E-02 | transcription_start_site | - | 343942 | 343942 | -2743 | 16459 | AN3656 |
| 1427 | CONTIG61 | 346503 | 346867 | 1.62 | 3.70E-02 | transcription_start_site | - | 343862 | 343862 | -2823 | 16460 | AN3656 |
| 1427 | CONTIG61 | 346503 | 346867 | 1.62 | 3.70E-02 | transcription_start_site | - | 343709 | 343709 | -2976 | 16461 | AN3656 |
| 1427 | CONTIG61 | 346503 | 346867 | 1.62 | 3.70E-02 | transcription_start_site | - | 343372 | 343372 | -3313 | 16462 | AN3656 |
| 1427 | CONTIG61 | 346503 | 346867 | 1.62 | 3.70E-02 | transcription_start_site | - | 343226 | 343226 | -3459 | 16463 | AN3656 |
| 1427 | CONTIG61 | 346503 | 346867 | 1.62 | 3.70E-02 | transcription_start_site | + | 347381 | 347381 | -696  | 16466 | AN3657 |
| 776  | CONTIG61 | 349508 | 349852 | 2.12 | 5.20E-03 | transcription_start_site | - | 349121 | 349121 | -559  | 16467 | AN3658 |
| 776  | CONTIG61 | 349508 | 349852 | 2.12 | 5.20E-03 | transcription_start_site | - | 348846 | 348846 | -834  | 16468 | AN3658 |
| 776  | CONTIG61 | 349508 | 349852 | 2.12 | 5.20E-03 | transcription_start_site | + | 350195 | 350195 | -515  | 16469 | AN3659 |
| 776  | CONTIG61 | 349508 | 349852 | 2.12 | 5.20E-03 | transcription_start_site | + | 350427 | 350427 | -747  | 16470 | AN3659 |
| 776  | CONTIG61 | 349508 | 349852 | 2.12 | 5.20E-03 | transcription_start_site | + | 352381 | 352381 | -2701 | 16471 | AN3659 |
| 1427 | CONTIG61 | 346503 | 346867 | 1.62 | 3.70E-02 | transcription_start_site | + | 350195 | 350195 | -3510 | 16469 | AN3659 |
| 1427 | CONTIG61 | 346503 | 346867 | 1.62 | 3.70E-02 | transcription_start_site | + | 350427 | 350427 | -3742 | 16470 | AN3659 |
| 1329 | CONTIG61 | 369992 | 370251 | 1.67 | 3.08E-02 | transcription_start_site | - | 369613 | 369613 | -508  | 16478 | AN3664 |
| 1329 | CONTIG61 | 369992 | 370251 | 1.67 | 3.08E-02 | transcription_start_site | - | 368285 | 368285 | -1836 | 16479 | AN3664 |
| 1329 | CONTIG61 | 369992 | 370251 | 1.67 | 3.08E-02 | transcription_start_site | - | 368150 | 368150 | -1971 | 16480 | AN3664 |
| 1830 | CONTIG61 | 374492 | 374908 | 1.44 | 6.84E-02 | transcription_start_site | - | 369613 | 369613 | -5087 | 16478 | AN3664 |
| 1830 | CONTIG61 | 374492 | 374908 | 1.44 | 6.84E-02 | transcription_start_site | - | 374463 | 374463 | -237  | 16481 | AN3665 |
| 1830 | CONTIG61 | 374492 | 374908 | 1.44 | 6.84E-02 | transcription_start_site | - | 374181 | 374181 | -519  | 16482 | AN3665 |
| 1830 | CONTIG61 | 374492 | 374908 | 1.44 | 6.84E-02 | transcription_start_site | - | 372805 | 372805 | -1895 | 16483 | AN3665 |
| 1830 | CONTIG61 | 374492 | 374908 | 1.44 | 6.84E-02 | transcription_start_site | - | 372557 | 372557 | -2143 | 16484 | AN3665 |
| 1830 | CONTIG61 | 374492 | 374908 | 1.44 | 6.84E-02 | transcription_start_site | - | 372278 | 372278 | -2422 | 16485 | AN3665 |
| 1830 | CONTIG61 | 374492 | 374908 | 1.44 | 6.84E-02 | transcription_start_site | - | 375397 | 375397 | 697   | 16488 | AN3666 |
| 1918 | CONTIG61 | 380026 | 381515 | 1.4  | 5.52E-02 | transcription_start_site | - | 376136 | 376136 | -4634 | 16486 | AN3666 |
| 1918 | CONTIG61 | 380026 | 381515 | 1.4  | 5.52E-02 | transcription_start_site | - | 376037 | 376037 | -4733 | 16487 | AN3666 |
| 1918 | CONTIG61 | 380026 | 381515 | 1.4  | 5.52E-02 | transcription_start_site | - | 375397 | 375397 | -5373 | 16488 | AN3666 |
| 1918 | CONTIG61 | 380026 | 381515 | 1.4  | 5.52E-02 | transcription_start_site | - | 378571 | 378571 | -2199 | 16489 | AN3667 |
| 1918 | CONTIG61 | 380026 | 381515 | 1.4  | 5.52E-02 | transcription_start_site | - | 378330 | 378330 | -2440 | 16490 | AN3667 |
| 2327 | CONTIG61 | 395720 | 396073 | 1.26 | 1.07E-01 | transcription_start_site | - | 393335 | 393335 | -2561 | 16491 | AN3668 |
| 2327 | CONTIG61 | 395720 | 396073 | 1.26 | 1.07E-01 | transcription_start_site | - | 393059 | 393059 | -2837 | 16492 | AN3668 |
| 2327 | CONTIG61 | 395720 | 396073 | 1.26 | 1.07E-01 | transcription_start_site | - | 392896 | 392896 | -3000 | 16493 | AN3668 |
| 2327 | CONTIG61 | 395720 | 396073 | 1.26 | 1.07E-01 | transcription_start_site | - | 392623 | 392623 | -3273 | 16494 | AN3668 |
| 2327 | CONTIG61 | 395720 | 396073 | 1.26 | 1.07E-01 | transcription_start_site | - | 391732 | 391732 | -4164 | 16495 | AN3668 |
| 2327 | CONTIG61 | 395720 | 396073 | 1.26 | 1.07E-01 | transcription_start_site | - | 395636 | 395636 | -260  | 16496 | AN3669 |
| 2327 | CONTIG61 | 395720 | 396073 | 1.26 | 1.07E-01 | transcription_start_site | - | 395101 | 395101 | -795  | 16497 | AN3669 |
| 2327 | CONTIG61 | 395720 | 396073 | 1.26 | 1.07E-01 | transcription_start_site | - | 394885 | 394885 | -1011 | 16498 | AN3669 |
| 2327 | CONTIG61 | 395720 | 396073 | 1.26 | 1.07E-01 | transcription_start_site | - | 394461 | 394461 | -1435 | 16499 | AN3669 |
| 2327 | CONTIG61 | 395720 | 396073 | 1.26 | 1.07E-01 | transcription_start_site | - | 396719 | 396719 | 822   | 16501 | AN3670 |
| 277  | CONTIG61 | 407346 | 407755 | 2.8  | 2.67E-04 | transcription_start_site | + | 408593 | 408593 | -1042 | 16509 | AN3674 |
| 277  | CONTIG61 | 407346 | 407755 | 2.8  | 2.67E-04 | transcription_start_site | + | 408939 | 408939 | -1388 | 16510 | AN3674 |
| 277  | CONTIG61 | 407346 | 407755 | 2.8  | 2.67E-04 | transcription_start_site | + | 409196 | 409196 | -1645 | 16511 | AN3674 |
| 277  | CONTIG61 | 407346 | 407755 | 2.8  | 2.67E-04 | transcription_start_site | + | 409777 | 409777 | -2226 | 16512 | AN3674 |
| 2444 | CONTIG61 | 410042 | 410391 | 1.22 | 1.44E-01 | transcription_start_site | + | 409777 | 409777 | 439   | 16512 | AN3674 |
| 2444 | CONTIG61 | 410042 | 410391 | 1.22 | 1.44E-01 | transcription_start_site | + | 409196 | 409196 | 1020  | 16511 | AN3674 |
| 440  | CONTIG61 | 411904 | 412478 | 2.53 | 9.51E-04 | transcription_start_site | + | 413385 | 413385 | -1194 | 16513 | AN3675 |
| 440  | CONTIG61 | 411904 | 412478 | 2.53 | 9.51E-04 | transcription_start_site | + | 413473 | 413473 | -1282 | 16514 | AN3675 |
| 2444 | CONTIG61 | 410042 | 410391 | 1.22 | 1.44E-01 | transcription_start_site | + | 413385 | 413385 | -3168 | 16513 | AN3675 |
| 2444 | CONTIG61 | 410042 | 410391 | 1.22 | 1.44E-01 | transcription_start_site | + | 413473 | 413473 | -3256 | 16514 | AN3675 |
| 2445 | CONTIG61 | 412894 | 413913 | 1.22 | 1.44E-01 | transcription_start_site | + | 413385 | 413385 | 18    | 16513 | AN3675 |
| 2445 | CONTIG61 | 412894 | 413913 | 1.22 | 1.44E-01 | transcription_start_site | + | 413473 | 413473 | -69   | 16514 | AN3675 |
| 2595 | CONTIG61 | 421518 | 422077 | 1.17 | 1.66E-01 | transcription_start_site | - | 418035 | 418035 | -3762 | 16515 | AN3677 |
| 2595 | CONTIG61 | 421518 | 422077 | 1.17 | 1.66E-01 | transcription_start_site | - | 417238 | 417238 | -4559 | 16516 | AN3677 |
| 2445 | CONTIG61 | 412894 | 413913 | 1.22 | 1.44E-01 | transcription_start_site | + | 418426 | 418426 | -5022 | 16517 | AN3678 |

|               |        |        |      |          |                          |   |        |        |       |       |        |
|---------------|--------|--------|------|----------|--------------------------|---|--------|--------|-------|-------|--------|
| 2590 CONTIG61 | 423228 | 424115 | 1.17 | 1.59E-01 | transcription_start_site | + | 422764 | 422764 | 907   | 16524 | AN3679 |
| 2590 CONTIG61 | 423228 | 424115 | 1.17 | 1.59E-01 | transcription_start_site | + | 422384 | 422384 | 1287  | 16523 | AN3679 |
| 2590 CONTIG61 | 423228 | 424115 | 1.17 | 1.59E-01 | transcription_start_site | + | 422267 | 422267 | 1404  | 16522 | AN3679 |
| 2595 CONTIG61 | 421518 | 422077 | 1.17 | 1.66E-01 | transcription_start_site | + | 422151 | 422151 | -353  | 16521 | AN3679 |
| 2595 CONTIG61 | 421518 | 422077 | 1.17 | 1.66E-01 | transcription_start_site | + | 422267 | 422267 | -469  | 16522 | AN3679 |
| 2595 CONTIG61 | 421518 | 422077 | 1.17 | 1.66E-01 | transcription_start_site | + | 422384 | 422384 | -586  | 16523 | AN3679 |
| 2595 CONTIG61 | 421518 | 422077 | 1.17 | 1.66E-01 | transcription_start_site | + | 422764 | 422764 | -966  | 16524 | AN3679 |
| 2590 CONTIG61 | 423228 | 424115 | 1.17 | 1.59E-01 | transcription_start_site | + | 423586 | 423586 | 85    | 16525 | AN3680 |
| 2595 CONTIG61 | 421518 | 422077 | 1.17 | 1.66E-01 | transcription_start_site | + | 423586 | 423586 | -1788 | 16525 | AN3680 |
| 2059 CONTIG61 | 426164 | 426521 | 1.35 | 9.24E-02 | transcription_start_site | + | 426508 | 426508 | -165  | 16527 | AN3681 |
| 2059 CONTIG61 | 426164 | 426521 | 1.35 | 9.24E-02 | transcription_start_site | + | 426055 | 426055 | 287   | 16526 | AN3681 |
| 2590 CONTIG61 | 423228 | 424115 | 1.17 | 1.59E-01 | transcription_start_site | + | 426055 | 426055 | -2383 | 16526 | AN3681 |
| 2590 CONTIG61 | 423228 | 424115 | 1.17 | 1.59E-01 | transcription_start_site | + | 426508 | 426508 | -2836 | 16527 | AN3681 |
| 2595 CONTIG61 | 421518 | 422077 | 1.17 | 1.66E-01 | transcription_start_site | + | 426055 | 426055 | -4257 | 16526 | AN3681 |
| 2595 CONTIG61 | 421518 | 422077 | 1.17 | 1.66E-01 | transcription_start_site | + | 426508 | 426508 | -4710 | 16527 | AN3681 |
| 1330 CONTIG61 | 438232 | 438594 | 1.67 | 3.08E-02 | transcription_start_site | - | 433364 | 433364 | -5049 | 16528 | AN3683 |
| 1724 CONTIG61 | 429989 | 430259 | 1.49 | 5.88E-02 | transcription_start_site | + | 435201 | 435201 | -5077 | 16532 | AN3684 |
| 1331 CONTIG61 | 450991 | 451340 | 1.67 | 3.08E-02 | transcription_start_site | - | 446291 | 446291 | -4874 | 16537 | AN3687 |
| 1331 CONTIG61 | 450991 | 451340 | 1.67 | 3.08E-02 | transcription_start_site | - | 445997 | 445997 | -5168 | 16538 | AN3687 |
| 2694 CONTIG61 | 449855 | 450369 | 1.13 | 1.93E-01 | transcription_start_site | - | 446291 | 446291 | -3821 | 16537 | AN3687 |
| 2694 CONTIG61 | 449855 | 450369 | 1.13 | 1.93E-01 | transcription_start_site | - | 445997 | 445997 | -4115 | 16538 | AN3687 |
| 2694 CONTIG61 | 449855 | 450369 | 1.13 | 1.93E-01 | transcription_start_site | - | 445813 | 445813 | -4299 | 16539 | AN3687 |
| 2694 CONTIG61 | 449855 | 450369 | 1.13 | 1.93E-01 | transcription_start_site | - | 445714 | 445714 | -4398 | 16540 | AN3687 |
| 2694 CONTIG61 | 449855 | 450369 | 1.13 | 1.93E-01 | transcription_start_site | - | 445496 | 445496 | -4616 | 16541 | AN3687 |
| 1331 CONTIG61 | 450991 | 451340 | 1.67 | 3.08E-02 | transcription_start_site | + | 450194 | 450194 | 971   | 16547 | AN3688 |
| 2694 CONTIG61 | 449855 | 450369 | 1.13 | 1.93E-01 | transcription_start_site | + | 450194 | 450194 | -82   | 16547 | AN3688 |
| 2694 CONTIG61 | 449855 | 450369 | 1.13 | 1.93E-01 | transcription_start_site | + | 449801 | 449801 | 311   | 16546 | AN3688 |
| 2694 CONTIG61 | 449855 | 450369 | 1.13 | 1.93E-01 | transcription_start_site | + | 449557 | 449557 | 555   | 16545 | AN3688 |
| 1331 CONTIG61 | 450991 | 451340 | 1.67 | 3.08E-02 | transcription_start_site | + | 455026 | 455026 | -3860 | 16548 | AN3689 |
| 1331 CONTIG61 | 450991 | 451340 | 1.67 | 3.08E-02 | transcription_start_site | + | 455180 | 455180 | -4014 | 16549 | AN3689 |
| 1331 CONTIG61 | 450991 | 451340 | 1.67 | 3.08E-02 | transcription_start_site | + | 455774 | 455774 | -4608 | 16550 | AN3689 |
| 2694 CONTIG61 | 449855 | 450369 | 1.13 | 1.93E-01 | transcription_start_site | + | 455026 | 455026 | -4914 | 16548 | AN3689 |
| 2694 CONTIG61 | 449855 | 450369 | 1.13 | 1.93E-01 | transcription_start_site | + | 455180 | 455180 | -5068 | 16549 | AN3689 |
| 1924 CONTIG61 | 465157 | 465726 | 1.4  | 8.01E-02 | transcription_start_site | - | 464948 | 464948 | -493  | 16564 | AN3692 |
| 1924 CONTIG61 | 465157 | 465726 | 1.4  | 8.01E-02 | transcription_start_site | + | 466348 | 466348 | -906  | 16565 | AN3693 |
| 1924 CONTIG61 | 465157 | 465726 | 1.4  | 8.01E-02 | transcription_start_site | + | 466471 | 466471 | -1029 | 16566 | AN3693 |
| 1924 CONTIG61 | 465157 | 465726 | 1.4  | 8.01E-02 | transcription_start_site | + | 466583 | 466583 | -1141 | 16567 | AN3693 |
| 1924 CONTIG61 | 465157 | 465726 | 1.4  | 8.01E-02 | transcription_start_site | + | 466802 | 466802 | -1360 | 16568 | AN3693 |
| 1924 CONTIG61 | 465157 | 465726 | 1.4  | 8.01E-02 | transcription_start_site | + | 468426 | 468426 | -2984 | 16569 | AN3693 |
| 388 CONTIG61  | 491637 | 491977 | 2.62 | 5.64E-04 | transcription_start_site | + | 492093 | 492093 | -286  | 16602 | AN3703 |
| 388 CONTIG61  | 491637 | 491977 | 2.62 | 5.64E-04 | transcription_start_site | - | 492810 | 492810 | 1003  | 16609 | AN3704 |
| 2440 CONTIG61 | 496952 | 497601 | 1.22 | 1.28E-01 | transcription_start_site | - | 494173 | 494173 | -3103 | 16603 | AN3704 |
| 2440 CONTIG61 | 496952 | 497601 | 1.22 | 1.28E-01 | transcription_start_site | - | 493995 | 493995 | -3281 | 16604 | AN3704 |
| 2440 CONTIG61 | 496952 | 497601 | 1.22 | 1.28E-01 | transcription_start_site | - | 493482 | 493482 | -3794 | 16605 | AN3704 |
| 2440 CONTIG61 | 496952 | 497601 | 1.22 | 1.28E-01 | transcription_start_site | - | 493280 | 493280 | -3996 | 16606 | AN3704 |
| 2440 CONTIG61 | 496952 | 497601 | 1.22 | 1.28E-01 | transcription_start_site | - | 493217 | 493217 | -4059 | 16607 | AN3704 |
| 2440 CONTIG61 | 496952 | 497601 | 1.22 | 1.28E-01 | transcription_start_site | - | 493052 | 493052 | -4224 | 16608 | AN3704 |
| 2440 CONTIG61 | 496952 | 497601 | 1.22 | 1.28E-01 | transcription_start_site | - | 492810 | 492810 | -4466 | 16609 | AN3704 |
| 2440 CONTIG61 | 496952 | 497601 | 1.22 | 1.28E-01 | transcription_start_site | + | 498292 | 498292 | -1015 | 16610 | AN3706 |
| 2440 CONTIG61 | 496952 | 497601 | 1.22 | 1.28E-01 | transcription_start_site | + | 498350 | 498350 | -1073 | 16611 | AN3706 |
| 2440 CONTIG61 | 496952 | 497601 | 1.22 | 1.28E-01 | transcription_start_site | + | 498507 | 498507 | -1230 | 16612 | AN3706 |
| 2440 CONTIG61 | 496952 | 497601 | 1.22 | 1.28E-01 | transcription_start_site | + | 498732 | 498732 | -1455 | 16613 | AN3706 |
| 2440 CONTIG61 | 496952 | 497601 | 1.22 | 1.28E-01 | transcription_start_site | + | 501282 | 501282 | -4005 | 16617 | AN3708 |
| 2440 CONTIG61 | 496952 | 497601 | 1.22 | 1.28E-01 | transcription_start_site | + | 501389 | 501389 | -4112 | 16618 | AN3708 |
| 2440 CONTIG61 | 496952 | 497601 | 1.22 | 1.28E-01 | transcription_start_site | + | 501574 | 501574 | -4297 | 16619 | AN3708 |
| 2440 CONTIG61 | 496952 | 497601 | 1.22 | 1.28E-01 | transcription_start_site | + | 501858 | 501858 | -4581 | 16620 | AN3708 |
| 2440 CONTIG61 | 496952 | 497601 | 1.22 | 1.28E-01 | transcription_start_site | + | 502022 | 502022 | -4745 | 16621 | AN3708 |

|      |          |        |        |      |          |                          |   |        |        |       |       |        |
|------|----------|--------|--------|------|----------|--------------------------|---|--------|--------|-------|-------|--------|
| 2440 | CONTIG61 | 496952 | 497601 | 1.22 | 1.28E-01 | transcription_start_site | + | 502089 | 502089 | -4812 | 16622 | AN3708 |
| 2446 | CONTIG61 | 512719 | 512978 | 1.22 | 1.44E-01 | transcription_start_site | + | 512925 | 512925 | -76   | 16639 | AN3712 |
| 2446 | CONTIG61 | 512719 | 512978 | 1.22 | 1.44E-01 | transcription_start_site | + | 512770 | 512770 | 78    | 16638 | AN3712 |
| 2446 | CONTIG61 | 512719 | 512978 | 1.22 | 1.44E-01 | transcription_start_site | + | 513312 | 513312 | -463  | 16640 | AN3712 |
| 2446 | CONTIG61 | 512719 | 512978 | 1.22 | 1.44E-01 | transcription_start_site | + | 513509 | 513509 | -660  | 16641 | AN3712 |
| 730  | CONTIG61 | 515864 | 516138 | 2.17 | 4.61E-03 | transcription_start_site | - | 515995 | 515995 | -6    | 16642 | AN3713 |
| 730  | CONTIG61 | 515864 | 516138 | 2.17 | 4.61E-03 | transcription_start_site | - | 515706 | 515706 | -295  | 16643 | AN3713 |
| 730  | CONTIG61 | 515864 | 516138 | 2.17 | 4.61E-03 | transcription_start_site | + | 517353 | 517353 | -1352 | 16644 | AN3714 |
| 730  | CONTIG61 | 515864 | 516138 | 2.17 | 4.61E-03 | transcription_start_site | + | 517676 | 517676 | -1675 | 16645 | AN3714 |
| 730  | CONTIG61 | 515864 | 516138 | 2.17 | 4.61E-03 | transcription_start_site | + | 518370 | 518370 | -2369 | 16646 | AN3714 |
| 730  | CONTIG61 | 515864 | 516138 | 2.17 | 4.61E-03 | transcription_start_site | + | 519118 | 519118 | -3117 | 16647 | AN3714 |
| 2446 | CONTIG61 | 512719 | 512978 | 1.22 | 1.44E-01 | transcription_start_site | + | 517353 | 517353 | -4504 | 16644 | AN3714 |
| 2446 | CONTIG61 | 512719 | 512978 | 1.22 | 1.44E-01 | transcription_start_site | + | 517676 | 517676 | -4827 | 16645 | AN3714 |
| 2060 | CONTIG61 | 536795 | 537064 | 1.35 | 9.24E-02 | transcription_start_site | - | 532415 | 532415 | -4514 | 16653 | AN3719 |
| 2060 | CONTIG61 | 536795 | 537064 | 1.35 | 9.24E-02 | transcription_start_site | - | 532256 | 532256 | -4673 | 16654 | AN3719 |
| 2060 | CONTIG61 | 536795 | 537064 | 1.35 | 9.24E-02 | transcription_start_site | - | 532003 | 532003 | -4926 | 16655 | AN3719 |
| 2060 | CONTIG61 | 536795 | 537064 | 1.35 | 9.24E-02 | transcription_start_site | - | 537159 | 537159 | 229   | 16658 | AN3720 |
| 2060 | CONTIG61 | 536795 | 537064 | 1.35 | 9.24E-02 | transcription_start_site | - | 536598 | 536598 | -331  | 16659 | AN3720 |
| 2060 | CONTIG61 | 536795 | 537064 | 1.35 | 9.24E-02 | transcription_start_site | - | 534895 | 534895 | -2034 | 16660 | AN3720 |
| 2060 | CONTIG61 | 536795 | 537064 | 1.35 | 9.24E-02 | transcription_start_site | + | 538437 | 538437 | -1507 | 16661 | AN3721 |
| 2060 | CONTIG61 | 536795 | 537064 | 1.35 | 9.24E-02 | transcription_start_site | + | 538759 | 538759 | -1829 | 16662 | AN3721 |
| 2060 | CONTIG61 | 536795 | 537064 | 1.35 | 9.24E-02 | transcription_start_site | + | 540681 | 540681 | -3751 | 16663 | AN3721 |
| 1139 | CONTIG61 | 549456 | 549810 | 1.8  | 1.84E-02 | transcription_start_site | - | 549342 | 549342 | -291  | 16669 | AN3725 |
| 1139 | CONTIG61 | 549456 | 549810 | 1.8  | 1.84E-02 | transcription_start_site | - | 549253 | 549253 | -380  | 16670 | AN3725 |
| 1139 | CONTIG61 | 549456 | 549810 | 1.8  | 1.84E-02 | transcription_start_site | - | 549008 | 549008 | -625  | 16671 | AN3725 |
| 1139 | CONTIG61 | 549456 | 549810 | 1.8  | 1.84E-02 | transcription_start_site | + | 550199 | 550199 | -566  | 16672 | AN3726 |
| 1139 | CONTIG61 | 549456 | 549810 | 1.8  | 1.84E-02 | transcription_start_site | + | 551156 | 551156 | -1523 | 16673 | AN3726 |
| 1139 | CONTIG61 | 549456 | 549810 | 1.8  | 1.84E-02 | transcription_start_site | + | 552000 | 552000 | -2367 | 16674 | AN3726 |
| 1139 | CONTIG61 | 549456 | 549810 | 1.8  | 1.84E-02 | transcription_start_site | + | 552241 | 552241 | -2608 | 16675 | AN3726 |
| 1139 | CONTIG61 | 549456 | 549810 | 1.8  | 1.84E-02 | transcription_start_site | + | 553712 | 553712 | -4079 | 16676 | AN3727 |
| 1139 | CONTIG61 | 549456 | 549810 | 1.8  | 1.84E-02 | transcription_start_site | + | 553938 | 553938 | -4305 | 16677 | AN3727 |
| 365  | CONTIG61 | 567152 | 567450 | 2.66 | 6.10E-04 | transcription_start_site | - | 564109 | 564109 | -3192 | 16682 | AN3729 |
| 365  | CONTIG61 | 567152 | 567450 | 2.66 | 6.10E-04 | transcription_start_site | - | 563895 | 563895 | -3406 | 16683 | AN3729 |
| 502  | CONTIG61 | 565142 | 565494 | 2.44 | 0.00E+00 | transcription_start_site | - | 564109 | 564109 | -1209 | 16682 | AN3729 |
| 502  | CONTIG61 | 565142 | 565494 | 2.44 | 0.00E+00 | transcription_start_site | - | 563895 | 563895 | -1423 | 16683 | AN3729 |
| 365  | CONTIG61 | 567152 | 567450 | 2.66 | 6.10E-04 | transcription_start_site | + | 568900 | 568900 | -1599 | 16685 | AN3730 |
| 365  | CONTIG61 | 567152 | 567450 | 2.66 | 6.10E-04 | transcription_start_site | + | 569048 | 569048 | -1747 | 16686 | AN3730 |
| 365  | CONTIG61 | 567152 | 567450 | 2.66 | 6.10E-04 | transcription_start_site | + | 569141 | 569141 | -1840 | 16687 | AN3730 |
| 365  | CONTIG61 | 567152 | 567450 | 2.66 | 6.10E-04 | transcription_start_site | + | 569228 | 569228 | -1927 | 16688 | AN3730 |
| 365  | CONTIG61 | 567152 | 567450 | 2.66 | 6.10E-04 | transcription_start_site | + | 570030 | 570030 | -2729 | 16689 | AN3730 |
| 502  | CONTIG61 | 565142 | 565494 | 2.44 | 0.00E+00 | transcription_start_site | + | 568900 | 568900 | -3582 | 16685 | AN3730 |
| 502  | CONTIG61 | 565142 | 565494 | 2.44 | 0.00E+00 | transcription_start_site | + | 569048 | 569048 | -3730 | 16686 | AN3730 |
| 502  | CONTIG61 | 565142 | 565494 | 2.44 | 0.00E+00 | transcription_start_site | + | 569141 | 569141 | -3823 | 16687 | AN3730 |
| 502  | CONTIG61 | 565142 | 565494 | 2.44 | 0.00E+00 | transcription_start_site | + | 569228 | 569228 | -3910 | 16688 | AN3730 |
| 502  | CONTIG61 | 565142 | 565494 | 2.44 | 0.00E+00 | transcription_start_site | + | 570030 | 570030 | -4712 | 16689 | AN3730 |
| 365  | CONTIG61 | 567152 | 567450 | 2.66 | 6.10E-04 | transcription_start_site | + | 571692 | 571692 | -4391 | 16690 | AN3731 |
| 927  | CONTIG61 | 574587 | 574868 | 1.98 | 8.81E-03 | transcription_start_site | - | 575755 | 575755 | 1027  | 16696 | AN3732 |
| 634  | CONTIG61 | 585682 | 585964 | 2.26 | 3.03E-03 | transcription_start_site | - | 583805 | 583805 | -2018 | 16699 | AN3734 |
| 634  | CONTIG61 | 585682 | 585964 | 2.26 | 3.03E-03 | transcription_start_site | - | 583006 | 583006 | -2817 | 16700 | AN3734 |
| 634  | CONTIG61 | 585682 | 585964 | 2.26 | 3.03E-03 | transcription_start_site | - | 582261 | 582261 | -3562 | 16701 | AN3734 |
| 634  | CONTIG61 | 585682 | 585964 | 2.26 | 3.03E-03 | transcription_start_site | + | 586348 | 586348 | -525  | 16702 | AN3735 |
| 634  | CONTIG61 | 585682 | 585964 | 2.26 | 3.03E-03 | transcription_start_site | + | 589217 | 589217 | -3394 | 16703 | AN3735 |
| 1140 | CONTIG61 | 596861 | 597378 | 1.8  | 1.84E-02 | transcription_start_site | - | 592393 | 592393 | -4726 | 16704 | AN3736 |
| 1428 | CONTIG61 | 595587 | 595861 | 1.62 | 3.70E-02 | transcription_start_site | - | 592393 | 592393 | -3331 | 16704 | AN3736 |
| 1428 | CONTIG61 | 595587 | 595861 | 1.62 | 3.70E-02 | transcription_start_site | - | 591709 | 591709 | -4015 | 16705 | AN3736 |
| 1140 | CONTIG61 | 596861 | 597378 | 1.8  | 1.84E-02 | transcription_start_site | - | 595814 | 595814 | -1305 | 16709 | AN3738 |
| 1140 | CONTIG61 | 596861 | 597378 | 1.8  | 1.84E-02 | transcription_start_site | - | 595248 | 595248 | -1871 | 16710 | AN3738 |



|      |          |        |        |      |          |                          |   |        |        |       |       |        |
|------|----------|--------|--------|------|----------|--------------------------|---|--------|--------|-------|-------|--------|
| 1428 | CONTIG61 | 595587 | 595861 | 1.62 | 3.70E-02 | transcription_start_site | - | 595814 | 595814 | 90    | 16709 | AN3738 |
| 1428 | CONTIG61 | 595587 | 595861 | 1.62 | 3.70E-02 | transcription_start_site | - | 595248 | 595248 | -476  | 16710 | AN3738 |
| 1140 | CONTIG61 | 596861 | 597378 | 1.8  | 1.84E-02 | transcription_start_site | + | 597983 | 597983 | -863  | 16711 | AN3739 |
| 1140 | CONTIG61 | 596861 | 597378 | 1.8  | 1.84E-02 | transcription_start_site | + | 598480 | 598480 | -1360 | 16712 | AN3739 |
| 1140 | CONTIG61 | 596861 | 597378 | 1.8  | 1.84E-02 | transcription_start_site | + | 598668 | 598668 | -1548 | 16713 | AN3739 |
| 1140 | CONTIG61 | 596861 | 597378 | 1.8  | 1.84E-02 | transcription_start_site | + | 598728 | 598728 | -1608 | 16714 | AN3739 |
| 1140 | CONTIG61 | 596861 | 597378 | 1.8  | 1.84E-02 | transcription_start_site | + | 598879 | 598879 | -1759 | 16715 | AN3739 |
| 1140 | CONTIG61 | 596861 | 597378 | 1.8  | 1.84E-02 | transcription_start_site | + | 599082 | 599082 | -1962 | 16716 | AN3739 |
| 1140 | CONTIG61 | 596861 | 597378 | 1.8  | 1.84E-02 | transcription_start_site | + | 599245 | 599245 | -2125 | 16717 | AN3739 |
| 1140 | CONTIG61 | 596861 | 597378 | 1.8  | 1.84E-02 | transcription_start_site | + | 599722 | 599722 | -2602 | 16718 | AN3739 |
| 1140 | CONTIG61 | 596861 | 597378 | 1.8  | 1.84E-02 | transcription_start_site | + | 599926 | 599926 | -2806 | 16719 | AN3739 |
| 1428 | CONTIG61 | 595587 | 595861 | 1.62 | 3.70E-02 | transcription_start_site | + | 597983 | 597983 | -2259 | 16711 | AN3739 |
| 1428 | CONTIG61 | 595587 | 595861 | 1.62 | 3.70E-02 | transcription_start_site | + | 598480 | 598480 | -2756 | 16712 | AN3739 |
| 1428 | CONTIG61 | 595587 | 595861 | 1.62 | 3.70E-02 | transcription_start_site | + | 598668 | 598668 | -2944 | 16713 | AN3739 |
| 1428 | CONTIG61 | 595587 | 595861 | 1.62 | 3.70E-02 | transcription_start_site | + | 598728 | 598728 | -3004 | 16714 | AN3739 |
| 1428 | CONTIG61 | 595587 | 595861 | 1.62 | 3.70E-02 | transcription_start_site | + | 598879 | 598879 | -3155 | 16715 | AN3739 |
| 1428 | CONTIG61 | 595587 | 595861 | 1.62 | 3.70E-02 | transcription_start_site | + | 599082 | 599082 | -3358 | 16716 | AN3739 |
| 1428 | CONTIG61 | 595587 | 595861 | 1.62 | 3.70E-02 | transcription_start_site | + | 599245 | 599245 | -3521 | 16717 | AN3739 |
| 1428 | CONTIG61 | 595587 | 595861 | 1.62 | 3.70E-02 | transcription_start_site | + | 599722 | 599722 | -3998 | 16718 | AN3739 |
| 1428 | CONTIG61 | 595587 | 595861 | 1.62 | 3.70E-02 | transcription_start_site | + | 599926 | 599926 | -4202 | 16719 | AN3739 |
| 1504 | CONTIG61 | 609751 | 610120 | 1.58 | 2.64E-02 | transcription_start_site | - | 605893 | 605893 | -4042 | 16726 | AN3742 |
| 1504 | CONTIG61 | 609751 | 610120 | 1.58 | 2.64E-02 | transcription_start_site | - | 605346 | 605346 | -4589 | 16727 | AN3742 |
| 1504 | CONTIG61 | 609751 | 610120 | 1.58 | 2.64E-02 | transcription_start_site | - | 610096 | 610096 | 160   | 16729 | AN3743 |
| 1504 | CONTIG61 | 609751 | 610120 | 1.58 | 2.64E-02 | transcription_start_site | - | 610426 | 610426 | 490   | 16728 | AN3743 |
| 1504 | CONTIG61 | 609751 | 610120 | 1.58 | 2.64E-02 | transcription_start_site | + | 613027 | 613027 | -3091 | 16732 | AN3745 |
| 1504 | CONTIG61 | 609751 | 610120 | 1.58 | 2.64E-02 | transcription_start_site | + | 613143 | 613143 | -3207 | 16733 | AN3745 |
| 870  | CONTIG61 | 618311 | 618590 | 2.03 | 7.85E-03 | transcription_start_site | - | 616710 | 616710 | -1740 | 16734 | AN3746 |
| 870  | CONTIG61 | 618311 | 618590 | 2.03 | 7.85E-03 | transcription_start_site | - | 616133 | 616133 | -2317 | 16735 | AN3746 |
| 870  | CONTIG61 | 618311 | 618590 | 2.03 | 7.85E-03 | transcription_start_site | - | 615427 | 615427 | -3023 | 16736 | AN3746 |
| 870  | CONTIG61 | 618311 | 618590 | 2.03 | 7.85E-03 | transcription_start_site | - | 615250 | 615250 | -3200 | 16737 | AN3746 |
| 870  | CONTIG61 | 618311 | 618590 | 2.03 | 7.85E-03 | transcription_start_site | + | 619870 | 619870 | -1419 | 16738 | AN3747 |
| 870  | CONTIG61 | 618311 | 618590 | 2.03 | 7.85E-03 | transcription_start_site | + | 620037 | 620037 | -1586 | 16739 | AN3747 |
| 870  | CONTIG61 | 618311 | 618590 | 2.03 | 7.85E-03 | transcription_start_site | + | 620383 | 620383 | -1932 | 16740 | AN3747 |
| 870  | CONTIG61 | 618311 | 618590 | 2.03 | 7.85E-03 | transcription_start_site | + | 620883 | 620883 | -2432 | 16741 | AN3747 |
| 870  | CONTIG61 | 618311 | 618590 | 2.03 | 7.85E-03 | transcription_start_site | + | 621064 | 621064 | -2613 | 16742 | AN3747 |
| 2336 | CONTIG61 | 639695 | 640264 | 1.26 | 1.25E-01 | transcription_start_site | - | 634997 | 634997 | -4982 | 16751 | AN3750 |
| 2596 | CONTIG61 | 638705 | 639144 | 1.17 | 1.66E-01 | transcription_start_site | - | 634997 | 634997 | -3927 | 16751 | AN3750 |
| 2596 | CONTIG61 | 638705 | 639144 | 1.17 | 1.66E-01 | transcription_start_site | - | 634544 | 634544 | -4380 | 16752 | AN3750 |
| 41   | CONTIG61 | 644405 | 644834 | 3.47 | 0.00E+00 | transcription_start_site | - | 640367 | 640367 | -4252 | 16753 | AN3751 |
| 605  | CONTIG61 | 642920 | 643184 | 2.3  | 2.22E-03 | transcription_start_site | - | 640367 | 640367 | -2685 | 16753 | AN3751 |
| 635  | CONTIG61 | 640365 | 640644 | 2.26 | 3.03E-03 | transcription_start_site | - | 640367 | 640367 | -137  | 16753 | AN3751 |
| 1831 | CONTIG61 | 643505 | 644079 | 1.44 | 6.84E-02 | transcription_start_site | - | 640367 | 640367 | -3425 | 16753 | AN3751 |
| 2336 | CONTIG61 | 639695 | 640264 | 1.26 | 1.25E-01 | transcription_start_site | - | 640367 | 640367 | 387   | 16753 | AN3751 |
| 41   | CONTIG61 | 644405 | 644834 | 3.47 | 0.00E+00 | transcription_start_site | - | 643505 | 643505 | -1114 | 16754 | AN3752 |
| 41   | CONTIG61 | 644405 | 644834 | 3.47 | 0.00E+00 | transcription_start_site | - | 641835 | 641835 | -2784 | 16755 | AN3752 |
| 605  | CONTIG61 | 642920 | 643184 | 2.3  | 2.22E-03 | transcription_start_site | - | 643505 | 643505 | 453   | 16754 | AN3752 |
| 605  | CONTIG61 | 642920 | 643184 | 2.3  | 2.22E-03 | transcription_start_site | - | 641835 | 641835 | -1217 | 16755 | AN3752 |
| 1831 | CONTIG61 | 643505 | 644079 | 1.44 | 6.84E-02 | transcription_start_site | - | 643505 | 643505 | -287  | 16754 | AN3752 |
| 1831 | CONTIG61 | 643505 | 644079 | 1.44 | 6.84E-02 | transcription_start_site | - | 641835 | 641835 | -1957 | 16755 | AN3752 |
| 1200 | CONTIG61 | 651680 | 651954 | 1.76 | 2.12E-02 | transcription_start_site | - | 648671 | 648671 | -3146 | 16756 | AN3753 |
| 1200 | CONTIG61 | 651680 | 651954 | 1.76 | 2.12E-02 | transcription_start_site | - | 648144 | 648144 | -3673 | 16757 | AN3753 |
| 1200 | CONTIG61 | 651680 | 651954 | 1.76 | 2.12E-02 | transcription_start_site | - | 647791 | 647791 | -4026 | 16758 | AN3753 |
| 1200 | CONTIG61 | 651680 | 651954 | 1.76 | 2.12E-02 | transcription_start_site | - | 647487 | 647487 | -4330 | 16759 | AN3753 |
| 1200 | CONTIG61 | 651680 | 651954 | 1.76 | 2.12E-02 | transcription_start_site | - | 647080 | 647080 | -4737 | 16760 | AN3753 |
| 1725 | CONTIG61 | 650045 | 650389 | 1.49 | 5.88E-02 | transcription_start_site | - | 648671 | 648671 | -1546 | 16756 | AN3753 |
| 1725 | CONTIG61 | 650045 | 650389 | 1.49 | 5.88E-02 | transcription_start_site | - | 648144 | 648144 | -2073 | 16757 | AN3753 |
| 1725 | CONTIG61 | 650045 | 650389 | 1.49 | 5.88E-02 | transcription_start_site | - | 647791 | 647791 | -2426 | 16758 | AN3753 |

|      |          |        |        |      |          |                          |   |        |        |       |       |        |
|------|----------|--------|--------|------|----------|--------------------------|---|--------|--------|-------|-------|--------|
| 1725 | CONTIG61 | 650045 | 650389 | 1.49 | 5.88E-02 | transcription_start_site | - | 647487 | 647487 | -2730 | 16759 | AN3753 |
| 1725 | CONTIG61 | 650045 | 650389 | 1.49 | 5.88E-02 | transcription_start_site | - | 647080 | 647080 | -3137 | 16760 | AN3753 |
| 1725 | CONTIG61 | 650045 | 650389 | 1.49 | 5.88E-02 | transcription_start_site | - | 646620 | 646620 | -3597 | 16761 | AN3753 |
| 2165 | CONTIG61 | 663469 | 664408 | 1.31 | 9.26E-02 | transcription_start_site | - | 663903 | 663903 | -35   | 16762 | AN3755 |
| 2165 | CONTIG61 | 663469 | 664408 | 1.31 | 9.26E-02 | transcription_start_site | - | 662661 | 662661 | -1277 | 16763 | AN3755 |
| 1024 | CONTIG61 | 669164 | 669433 | 1.89 | 1.30E-02 | transcription_start_site | - | 666437 | 666437 | -2861 | 16764 | AN3756 |
| 1024 | CONTIG61 | 669164 | 669433 | 1.89 | 1.30E-02 | transcription_start_site | - | 666336 | 666336 | -2962 | 16765 | AN3756 |
| 1024 | CONTIG61 | 669164 | 669433 | 1.89 | 1.30E-02 | transcription_start_site | - | 666231 | 666231 | -3067 | 16766 | AN3756 |
| 1024 | CONTIG61 | 669164 | 669433 | 1.89 | 1.30E-02 | transcription_start_site | - | 666156 | 666156 | -3142 | 16767 | AN3756 |
| 1024 | CONTIG61 | 669164 | 669433 | 1.89 | 1.30E-02 | transcription_start_site | - | 665824 | 665824 | -3474 | 16768 | AN3756 |
| 2165 | CONTIG61 | 663469 | 664408 | 1.31 | 9.26E-02 | transcription_start_site | + | 666982 | 666982 | -3043 | 16769 | AN3757 |
| 2165 | CONTIG61 | 663469 | 664408 | 1.31 | 9.26E-02 | transcription_start_site | + | 667124 | 667124 | -3185 | 16770 | AN3757 |
| 2165 | CONTIG61 | 663469 | 664408 | 1.31 | 9.26E-02 | transcription_start_site | + | 667660 | 667660 | -3721 | 16771 | AN3757 |
| 2165 | CONTIG61 | 663469 | 664408 | 1.31 | 9.26E-02 | transcription_start_site | + | 667887 | 667887 | -3948 | 16772 | AN3757 |
| 1024 | CONTIG61 | 669164 | 669433 | 1.89 | 1.30E-02 | transcription_start_site | - | 669428 | 669428 | 129   | 16774 | AN3758 |
| 1024 | CONTIG61 | 669164 | 669433 | 1.89 | 1.30E-02 | transcription_start_site | - | 669663 | 669663 | 364   | 16773 | AN3758 |
| 1024 | CONTIG61 | 669164 | 669433 | 1.89 | 1.30E-02 | transcription_start_site | + | 670305 | 670305 | -1006 | 16775 | AN3759 |
| 1024 | CONTIG61 | 669164 | 669433 | 1.89 | 1.30E-02 | transcription_start_site | + | 670563 | 670563 | -1264 | 16776 | AN3759 |
| 1024 | CONTIG61 | 669164 | 669433 | 1.89 | 1.30E-02 | transcription_start_site | + | 670749 | 670749 | -1450 | 16777 | AN3759 |
| 1024 | CONTIG61 | 669164 | 669433 | 1.89 | 1.30E-02 | transcription_start_site | + | 671096 | 671096 | -1797 | 16778 | AN3759 |
| 1024 | CONTIG61 | 669164 | 669433 | 1.89 | 1.30E-02 | transcription_start_site | + | 672631 | 672631 | -3332 | 16779 | AN3760 |
| 1024 | CONTIG61 | 669164 | 669433 | 1.89 | 1.30E-02 | transcription_start_site | + | 672738 | 672738 | -3439 | 16780 | AN3760 |
| 1024 | CONTIG61 | 669164 | 669433 | 1.89 | 1.30E-02 | transcription_start_site | + | 673059 | 673059 | -3760 | 16781 | AN3760 |
| 1501 | CONTIG61 | 674707 | 675436 | 1.58 | 2.45E-02 | transcription_start_site | + | 675037 | 675037 | 34    | 16782 | AN3761 |
| 420  | CONTIG61 | 681753 | 682184 | 2.57 | 8.69E-04 | transcription_start_site | + | 681182 | 681182 | 786   | 16785 | AN3762 |
| 420  | CONTIG61 | 681753 | 682184 | 2.57 | 8.69E-04 | transcription_start_site | + | 680833 | 680833 | 1135  | 16784 | AN3762 |
| 420  | CONTIG61 | 681753 | 682184 | 2.57 | 8.69E-04 | transcription_start_site | + | 682468 | 682468 | -499  | 16786 | AN3763 |
| 420  | CONTIG61 | 681753 | 682184 | 2.57 | 8.69E-04 | transcription_start_site | + | 682781 | 682781 | -812  | 16787 | AN3763 |
| 420  | CONTIG61 | 681753 | 682184 | 2.57 | 8.69E-04 | transcription_start_site | + | 683441 | 683441 | -1472 | 16788 | AN3763 |
| 420  | CONTIG61 | 681753 | 682184 | 2.57 | 8.69E-04 | transcription_start_site | + | 685327 | 685327 | -3358 | 16789 | AN3764 |
| 420  | CONTIG61 | 681753 | 682184 | 2.57 | 8.69E-04 | transcription_start_site | + | 685458 | 685458 | -3489 | 16790 | AN3764 |
| 420  | CONTIG61 | 681753 | 682184 | 2.57 | 8.69E-04 | transcription_start_site | + | 686301 | 686301 | -4332 | 16791 | AN3764 |
| 420  | CONTIG61 | 681753 | 682184 | 2.57 | 8.69E-04 | transcription_start_site | + | 686581 | 686581 | -4612 | 16792 | AN3764 |
| 543  | CONTIG61 | 694357 | 694626 | 2.39 | 1.54E-03 | transcription_start_site | - | 692136 | 692136 | -2355 | 16794 | AN3765 |
| 543  | CONTIG61 | 694357 | 694626 | 2.39 | 1.54E-03 | transcription_start_site | - | 691491 | 691491 | -3000 | 16795 | AN3765 |
| 2328 | CONTIG61 | 696917 | 697416 | 1.26 | 1.07E-01 | transcription_start_site | - | 692136 | 692136 | -5030 | 16794 | AN3765 |
| 1274 | CONTIG61 | 718432 | 718711 | 1.71 | 2.62E-02 | transcription_start_site | - | 717187 | 717187 | -1384 | 16805 | AN3770 |
| 1925 | CONTIG61 | 722179 | 722603 | 1.4  | 8.01E-02 | transcription_start_site | - | 717187 | 717187 | -5204 | 16805 | AN3770 |
| 1274 | CONTIG61 | 718432 | 718711 | 1.71 | 2.62E-02 | transcription_start_site | + | 717903 | 717903 | 668   | 16809 | AN3771 |
| 1274 | CONTIG61 | 718432 | 718711 | 1.71 | 2.62E-02 | transcription_start_site | + | 717721 | 717721 | 850   | 16808 | AN3771 |
| 1274 | CONTIG61 | 718432 | 718711 | 1.71 | 2.62E-02 | transcription_start_site | + | 717564 | 717564 | 1007  | 16807 | AN3771 |
| 1274 | CONTIG61 | 718432 | 718711 | 1.71 | 2.62E-02 | transcription_start_site | + | 717441 | 717441 | 1130  | 16806 | AN3771 |
| 1074 | CONTIG61 | 725859 | 726128 | 1.85 | 1.57E-02 | transcription_start_site | - | 723021 | 723021 | -2972 | 16810 | AN3773 |
| 1074 | CONTIG61 | 725859 | 726128 | 1.85 | 1.57E-02 | transcription_start_site | - | 722329 | 722329 | -3664 | 16811 | AN3773 |
| 1925 | CONTIG61 | 722179 | 722603 | 1.4  | 8.01E-02 | transcription_start_site | - | 722329 | 722329 | -62   | 16811 | AN3773 |
| 1925 | CONTIG61 | 722179 | 722603 | 1.4  | 8.01E-02 | transcription_start_site | - | 723021 | 723021 | 630   | 16810 | AN3773 |
| 1075 | CONTIG61 | 732079 | 732353 | 1.85 | 1.57E-02 | transcription_start_site | - | 727912 | 727912 | -4304 | 16812 | AN3774 |
| 1075 | CONTIG61 | 732079 | 732353 | 1.85 | 1.57E-02 | transcription_start_site | - | 727765 | 727765 | -4451 | 16813 | AN3774 |
| 1075 | CONTIG61 | 732079 | 732353 | 1.85 | 1.57E-02 | transcription_start_site | - | 727490 | 727490 | -4726 | 16814 | AN3774 |
| 1074 | CONTIG61 | 725859 | 726128 | 1.85 | 1.57E-02 | transcription_start_site | + | 729127 | 729127 | -3133 | 16815 | AN3775 |
| 1074 | CONTIG61 | 725859 | 726128 | 1.85 | 1.57E-02 | transcription_start_site | + | 729693 | 729693 | -3699 | 16816 | AN3775 |
| 1075 | CONTIG61 | 732079 | 732353 | 1.85 | 1.57E-02 | transcription_start_site | - | 732172 | 732172 | -44   | 16817 | AN3776 |
| 1075 | CONTIG61 | 732079 | 732353 | 1.85 | 1.57E-02 | transcription_start_site | - | 731450 | 731450 | -766  | 16818 | AN3776 |
| 1075 | CONTIG61 | 732079 | 732353 | 1.85 | 1.57E-02 | transcription_start_site | + | 734492 | 734492 | -2276 | 16819 | AN3777 |
| 1075 | CONTIG61 | 732079 | 732353 | 1.85 | 1.57E-02 | transcription_start_site | + | 735103 | 735103 | -2887 | 16820 | AN3777 |
| 1075 | CONTIG61 | 732079 | 732353 | 1.85 | 1.57E-02 | transcription_start_site | + | 735359 | 735359 | -3143 | 16821 | AN3777 |
| 1075 | CONTIG61 | 732079 | 732353 | 1.85 | 1.57E-02 | transcription_start_site | + | 735819 | 735819 | -3603 | 16822 | AN3777 |

|      |          |        |        |      |          |                          |   |        |        |       |       |        |
|------|----------|--------|--------|------|----------|--------------------------|---|--------|--------|-------|-------|--------|
| 278  | CONTIG61 | 750467 | 750741 | 2.8  | 2.67E-04 | transcription_start_site | - | 746289 | 746289 | -4315 | 16829 | AN3781 |
| 278  | CONTIG61 | 750467 | 750741 | 2.8  | 2.67E-04 | transcription_start_site | - | 746052 | 746052 | -4552 | 16830 | AN3781 |
| 777  | CONTIG61 | 749412 | 749901 | 2.12 | 5.20E-03 | transcription_start_site | - | 746289 | 746289 | -3367 | 16829 | AN3781 |
| 777  | CONTIG61 | 749412 | 749901 | 2.12 | 5.20E-03 | transcription_start_site | - | 746052 | 746052 | -3604 | 16830 | AN3781 |
| 777  | CONTIG61 | 749412 | 749901 | 2.12 | 5.20E-03 | transcription_start_site | - | 744508 | 744508 | -5148 | 16831 | AN3781 |
| 867  | CONTIG61 | 745962 | 746991 | 2.03 | 3.31E-03 | transcription_start_site | - | 746289 | 746289 | -187  | 16829 | AN3781 |
| 867  | CONTIG61 | 745962 | 746991 | 2.03 | 3.31E-03 | transcription_start_site | - | 746052 | 746052 | -424  | 16830 | AN3781 |
| 867  | CONTIG61 | 745962 | 746991 | 2.03 | 3.31E-03 | transcription_start_site | - | 744508 | 744508 | -1968 | 16831 | AN3781 |
| 278  | CONTIG61 | 750467 | 750741 | 2.8  | 2.67E-04 | transcription_start_site | - | 749332 | 749332 | -1272 | 16832 | AN3782 |
| 777  | CONTIG61 | 749412 | 749901 | 2.12 | 5.20E-03 | transcription_start_site | - | 749332 | 749332 | -324  | 16832 | AN3782 |
| 278  | CONTIG61 | 750467 | 750741 | 2.8  | 2.67E-04 | transcription_start_site | - | 750396 | 750396 | -208  | 16833 | AN3783 |
| 278  | CONTIG61 | 750467 | 750741 | 2.8  | 2.67E-04 | transcription_start_site | - | 750292 | 750292 | -312  | 16834 | AN3783 |
| 777  | CONTIG61 | 749412 | 749901 | 2.12 | 5.20E-03 | transcription_start_site | - | 750292 | 750292 | 635   | 16834 | AN3783 |
| 777  | CONTIG61 | 749412 | 749901 | 2.12 | 5.20E-03 | transcription_start_site | - | 750396 | 750396 | 739   | 16833 | AN3783 |
| 278  | CONTIG61 | 750467 | 750741 | 2.8  | 2.67E-04 | transcription_start_site | + | 752439 | 752439 | -1835 | 16835 | AN3784 |
| 278  | CONTIG61 | 750467 | 750741 | 2.8  | 2.67E-04 | transcription_start_site | + | 752603 | 752603 | -1999 | 16836 | AN3784 |
| 278  | CONTIG61 | 750467 | 750741 | 2.8  | 2.67E-04 | transcription_start_site | + | 752802 | 752802 | -2198 | 16837 | AN3784 |
| 278  | CONTIG61 | 750467 | 750741 | 2.8  | 2.67E-04 | transcription_start_site | + | 753231 | 753231 | -2627 | 16838 | AN3784 |
| 777  | CONTIG61 | 749412 | 749901 | 2.12 | 5.20E-03 | transcription_start_site | + | 752439 | 752439 | -2782 | 16835 | AN3784 |
| 777  | CONTIG61 | 749412 | 749901 | 2.12 | 5.20E-03 | transcription_start_site | + | 752603 | 752603 | -2946 | 16836 | AN3784 |
| 777  | CONTIG61 | 749412 | 749901 | 2.12 | 5.20E-03 | transcription_start_site | + | 752802 | 752802 | -3145 | 16837 | AN3784 |
| 777  | CONTIG61 | 749412 | 749901 | 2.12 | 5.20E-03 | transcription_start_site | + | 753231 | 753231 | -3574 | 16838 | AN3784 |
| 1069 | CONTIG61 | 758032 | 758676 | 1.85 | 3.83E-03 | transcription_start_site | - | 756366 | 756366 | -1988 | 16839 | AN3785 |
| 1069 | CONTIG61 | 758032 | 758676 | 1.85 | 3.83E-03 | transcription_start_site | - | 756201 | 756201 | -2153 | 16840 | AN3785 |
| 1069 | CONTIG61 | 758032 | 758676 | 1.85 | 3.83E-03 | transcription_start_site | - | 756119 | 756119 | -2235 | 16841 | AN3785 |
| 1069 | CONTIG61 | 758032 | 758676 | 1.85 | 3.83E-03 | transcription_start_site | - | 755962 | 755962 | -2392 | 16842 | AN3785 |
| 1069 | CONTIG61 | 758032 | 758676 | 1.85 | 3.83E-03 | transcription_start_site | - | 755667 | 755667 | -2687 | 16843 | AN3785 |
| 1069 | CONTIG61 | 758032 | 758676 | 1.85 | 3.83E-03 | transcription_start_site | - | 754604 | 754604 | -3750 | 16844 | AN3785 |
| 2061 | CONTIG61 | 759677 | 760036 | 1.35 | 9.24E-02 | transcription_start_site | - | 756366 | 756366 | -3490 | 16839 | AN3785 |
| 2061 | CONTIG61 | 759677 | 760036 | 1.35 | 9.24E-02 | transcription_start_site | - | 756201 | 756201 | -3655 | 16840 | AN3785 |
| 2061 | CONTIG61 | 759677 | 760036 | 1.35 | 9.24E-02 | transcription_start_site | - | 756119 | 756119 | -3737 | 16841 | AN3785 |
| 2061 | CONTIG61 | 759677 | 760036 | 1.35 | 9.24E-02 | transcription_start_site | - | 755962 | 755962 | -3894 | 16842 | AN3785 |
| 2061 | CONTIG61 | 759677 | 760036 | 1.35 | 9.24E-02 | transcription_start_site | - | 755667 | 755667 | -4189 | 16843 | AN3785 |
| 2447 | CONTIG61 | 756467 | 756811 | 1.22 | 1.44E-01 | transcription_start_site | - | 756366 | 756366 | -273  | 16839 | AN3785 |
| 2447 | CONTIG61 | 756467 | 756811 | 1.22 | 1.44E-01 | transcription_start_site | - | 756201 | 756201 | -438  | 16840 | AN3785 |
| 2447 | CONTIG61 | 756467 | 756811 | 1.22 | 1.44E-01 | transcription_start_site | - | 756119 | 756119 | -520  | 16841 | AN3785 |
| 2447 | CONTIG61 | 756467 | 756811 | 1.22 | 1.44E-01 | transcription_start_site | - | 755962 | 755962 | -677  | 16842 | AN3785 |
| 2447 | CONTIG61 | 756467 | 756811 | 1.22 | 1.44E-01 | transcription_start_site | - | 755667 | 755667 | -972  | 16843 | AN3785 |
| 2447 | CONTIG61 | 756467 | 756811 | 1.22 | 1.44E-01 | transcription_start_site | - | 754604 | 754604 | -2035 | 16844 | AN3785 |
| 1069 | CONTIG61 | 758032 | 758676 | 1.85 | 3.83E-03 | transcription_start_site | - | 759369 | 759369 | 1015  | 16849 | AN3786 |
| 1069 | CONTIG61 | 758032 | 758676 | 1.85 | 3.83E-03 | transcription_start_site | - | 759561 | 759561 | 1207  | 16848 | AN3786 |
| 1069 | CONTIG61 | 758032 | 758676 | 1.85 | 3.83E-03 | transcription_start_site | - | 759626 | 759626 | 1272  | 16847 | AN3786 |
| 2061 | CONTIG61 | 759677 | 760036 | 1.35 | 9.24E-02 | transcription_start_site | - | 759842 | 759842 | -14   | 16846 | AN3786 |
| 2061 | CONTIG61 | 759677 | 760036 | 1.35 | 9.24E-02 | transcription_start_site | - | 760021 | 760021 | 164   | 16845 | AN3786 |
| 2061 | CONTIG61 | 759677 | 760036 | 1.35 | 9.24E-02 | transcription_start_site | - | 759626 | 759626 | -230  | 16847 | AN3786 |
| 2061 | CONTIG61 | 759677 | 760036 | 1.35 | 9.24E-02 | transcription_start_site | - | 759561 | 759561 | -295  | 16848 | AN3786 |
| 2061 | CONTIG61 | 759677 | 760036 | 1.35 | 9.24E-02 | transcription_start_site | - | 759369 | 759369 | -487  | 16849 | AN3786 |
| 1069 | CONTIG61 | 758032 | 758676 | 1.85 | 3.83E-03 | transcription_start_site | + | 760528 | 760528 | -2174 | 16850 | AN3787 |
| 1069 | CONTIG61 | 758032 | 758676 | 1.85 | 3.83E-03 | transcription_start_site | + | 761108 | 761108 | -2754 | 16851 | AN3787 |
| 1069 | CONTIG61 | 758032 | 758676 | 1.85 | 3.83E-03 | transcription_start_site | + | 761560 | 761560 | -3206 | 16852 | AN3787 |
| 2061 | CONTIG61 | 759677 | 760036 | 1.35 | 9.24E-02 | transcription_start_site | + | 760528 | 760528 | -671  | 16850 | AN3787 |
| 2061 | CONTIG61 | 759677 | 760036 | 1.35 | 9.24E-02 | transcription_start_site | + | 761108 | 761108 | -1251 | 16851 | AN3787 |
| 2061 | CONTIG61 | 759677 | 760036 | 1.35 | 9.24E-02 | transcription_start_site | + | 761560 | 761560 | -1703 | 16852 | AN3787 |
| 2447 | CONTIG61 | 756467 | 756811 | 1.22 | 1.44E-01 | transcription_start_site | + | 760528 | 760528 | -3889 | 16850 | AN3787 |
| 2447 | CONTIG61 | 756467 | 756811 | 1.22 | 1.44E-01 | transcription_start_site | + | 761108 | 761108 | -4469 | 16851 | AN3787 |
| 2447 | CONTIG61 | 756467 | 756811 | 1.22 | 1.44E-01 | transcription_start_site | + | 761560 | 761560 | -4921 | 16852 | AN3787 |
| 871  | CONTIG61 | 775446 | 776000 | 2.03 | 7.85E-03 | transcription_start_site | + | 776620 | 776620 | -897  | 16866 | AN3793 |

|      |          |        |        |      |          |                          |   |        |        |       |       |        |
|------|----------|--------|--------|------|----------|--------------------------|---|--------|--------|-------|-------|--------|
| 871  | CONTIG61 | 775446 | 776000 | 2.03 | 7.85E-03 | transcription_start_site | + | 778023 | 778023 | -2300 | 16867 | AN3793 |
| 871  | CONTIG61 | 775446 | 776000 | 2.03 | 7.85E-03 | transcription_start_site | + | 778316 | 778316 | -2593 | 16868 | AN3793 |
| 2448 | CONTIG61 | 778146 | 778485 | 1.22 | 1.44E-01 | transcription_start_site | + | 778316 | 778316 | 0     | 16868 | AN3793 |
| 2448 | CONTIG61 | 778146 | 778485 | 1.22 | 1.44E-01 | transcription_start_site | + | 778023 | 778023 | 292   | 16867 | AN3793 |
| 2441 | CONTIG61 | 785476 | 785900 | 1.22 | 1.28E-01 | transcription_start_site | - | 782738 | 782738 | -2950 | 16869 | AN3794 |
| 2441 | CONTIG61 | 785476 | 785900 | 1.22 | 1.28E-01 | transcription_start_site | - | 781635 | 781635 | -4053 | 16870 | AN3794 |
| 2441 | CONTIG61 | 785476 | 785900 | 1.22 | 1.28E-01 | transcription_start_site | - | 781337 | 781337 | -4351 | 16871 | AN3794 |
| 2695 | CONTIG61 | 780751 | 781100 | 1.13 | 1.93E-01 | transcription_start_site | - | 781337 | 781337 | 411   | 16871 | AN3794 |
| 2695 | CONTIG61 | 780751 | 781100 | 1.13 | 1.93E-01 | transcription_start_site | - | 781635 | 781635 | 709   | 16870 | AN3794 |
| 2337 | CONTIG61 | 802201 | 802475 | 1.26 | 1.25E-01 | transcription_start_site | - | 801503 | 801503 | -835  | 16876 | AN3797 |
| 2337 | CONTIG61 | 802201 | 802475 | 1.26 | 1.25E-01 | transcription_start_site | - | 801071 | 801071 | -1267 | 16877 | AN3797 |
| 2337 | CONTIG61 | 802201 | 802475 | 1.26 | 1.25E-01 | transcription_start_site | + | 801861 | 801861 | 477   | 16878 | AN3798 |
| 2337 | CONTIG61 | 802201 | 802475 | 1.26 | 1.25E-01 | transcription_start_site | + | 805564 | 805564 | -3226 | 16880 | AN3800 |
| 2337 | CONTIG61 | 802201 | 802475 | 1.26 | 1.25E-01 | transcription_start_site | + | 805725 | 805725 | -3387 | 16881 | AN3800 |
| 2337 | CONTIG61 | 802201 | 802475 | 1.26 | 1.25E-01 | transcription_start_site | + | 805835 | 805835 | -3497 | 16882 | AN3800 |
| 2337 | CONTIG61 | 802201 | 802475 | 1.26 | 1.25E-01 | transcription_start_site | + | 806015 | 806015 | -3677 | 16883 | AN3800 |
| 2337 | CONTIG61 | 802201 | 802475 | 1.26 | 1.25E-01 | transcription_start_site | + | 806152 | 806152 | -3814 | 16884 | AN3800 |
| 2337 | CONTIG61 | 802201 | 802475 | 1.26 | 1.25E-01 | transcription_start_site | + | 806291 | 806291 | -3953 | 16885 | AN3800 |
| 537  | CONTIG61 | 812104 | 812913 | 2.39 | 0.00E+00 | transcription_start_site | - | 809767 | 809767 | -2741 | 16886 | AN3801 |
| 537  | CONTIG61 | 812104 | 812913 | 2.39 | 0.00E+00 | transcription_start_site | - | 809393 | 809393 | -3115 | 16887 | AN3801 |
| 537  | CONTIG61 | 812104 | 812913 | 2.39 | 0.00E+00 | transcription_start_site | - | 809164 | 809164 | -3344 | 16888 | AN3801 |
| 537  | CONTIG61 | 812104 | 812913 | 2.39 | 0.00E+00 | transcription_start_site | - | 809003 | 809003 | -3505 | 16889 | AN3801 |
| 537  | CONTIG61 | 812104 | 812913 | 2.39 | 0.00E+00 | transcription_start_site | - | 808616 | 808616 | -3892 | 16890 | AN3801 |
| 537  | CONTIG61 | 812104 | 812913 | 2.39 | 0.00E+00 | transcription_start_site | - | 808493 | 808493 | -4015 | 16891 | AN3801 |
| 537  | CONTIG61 | 812104 | 812913 | 2.39 | 0.00E+00 | transcription_start_site | - | 808323 | 808323 | -4185 | 16892 | AN3801 |
| 537  | CONTIG61 | 812104 | 812913 | 2.39 | 0.00E+00 | transcription_start_site | - | 808081 | 808081 | -4427 | 16893 | AN3801 |
| 537  | CONTIG61 | 812104 | 812913 | 2.39 | 0.00E+00 | transcription_start_site | - | 807852 | 807852 | -4656 | 16894 | AN3801 |
| 537  | CONTIG61 | 812104 | 812913 | 2.39 | 0.00E+00 | transcription_start_site | - | 807699 | 807699 | -4809 | 16895 | AN3801 |
| 537  | CONTIG61 | 812104 | 812913 | 2.39 | 0.00E+00 | transcription_start_site | - | 807624 | 807624 | -4884 | 16896 | AN3801 |
| 537  | CONTIG61 | 812104 | 812913 | 2.39 | 0.00E+00 | transcription_start_site | - | 807502 | 807502 | -5006 | 16897 | AN3801 |
| 537  | CONTIG61 | 812104 | 812913 | 2.39 | 0.00E+00 | transcription_start_site | - | 807347 | 807347 | -5161 | 16898 | AN3801 |
| 537  | CONTIG61 | 812104 | 812913 | 2.39 | 0.00E+00 | transcription_start_site | - | 807161 | 807161 | -5347 | 16899 | AN3801 |
| 361  | CONTIG61 | 816234 | 817328 | 2.66 | 0.00E+00 | transcription_start_site | + | 818986 | 818986 | -2205 | 16907 | AN3803 |
| 361  | CONTIG61 | 816234 | 817328 | 2.66 | 0.00E+00 | transcription_start_site | + | 819215 | 819215 | -2434 | 16908 | AN3803 |
| 361  | CONTIG61 | 816234 | 817328 | 2.66 | 0.00E+00 | transcription_start_site | + | 819417 | 819417 | -2636 | 16909 | AN3803 |
| 1275 | CONTIG61 | 815119 | 815912 | 1.71 | 2.62E-02 | transcription_start_site | + | 818986 | 818986 | -3470 | 16907 | AN3803 |
| 1275 | CONTIG61 | 815119 | 815912 | 1.71 | 2.62E-02 | transcription_start_site | + | 819215 | 819215 | -3699 | 16908 | AN3803 |
| 1275 | CONTIG61 | 815119 | 815912 | 1.71 | 2.62E-02 | transcription_start_site | + | 819417 | 819417 | -3901 | 16909 | AN3803 |
| 2696 | CONTIG61 | 819094 | 819503 | 1.13 | 1.93E-01 | transcription_start_site | + | 819215 | 819215 | 83    | 16908 | AN3803 |
| 2696 | CONTIG61 | 819094 | 819503 | 1.13 | 1.93E-01 | transcription_start_site | + | 819417 | 819417 | -118  | 16909 | AN3803 |
| 2696 | CONTIG61 | 819094 | 819503 | 1.13 | 1.93E-01 | transcription_start_site | + | 818986 | 818986 | 312   | 16907 | AN3803 |
| 42   | CONTIG61 | 824554 | 824834 | 3.47 | 0.00E+00 | transcription_start_site | - | 822828 | 822828 | -1866 | 16910 | AN3804 |
| 1622 | CONTIG61 | 822004 | 822890 | 1.53 | 5.22E-02 | transcription_start_site | - | 822828 | 822828 | 381   | 16910 | AN3804 |
| 2338 | CONTIG61 | 826204 | 826718 | 1.26 | 1.25E-01 | transcription_start_site | - | 822828 | 822828 | -3633 | 16910 | AN3804 |
| 2338 | CONTIG61 | 826204 | 826718 | 1.26 | 1.25E-01 | transcription_start_site | - | 825957 | 825957 | -504  | 16911 | AN3805 |
| 42   | CONTIG61 | 824554 | 824834 | 3.47 | 0.00E+00 | transcription_start_site | + | 826512 | 826512 | -1818 | 16912 | AN3806 |
| 1622 | CONTIG61 | 822004 | 822890 | 1.53 | 5.22E-02 | transcription_start_site | + | 826512 | 826512 | -4065 | 16912 | AN3806 |
| 2338 | CONTIG61 | 826204 | 826718 | 1.26 | 1.25E-01 | transcription_start_site | + | 826512 | 826512 | -51   | 16912 | AN3806 |
| 1832 | CONTIG61 | 838804 | 839168 | 1.44 | 6.84E-02 | transcription_start_site | - | 838171 | 838171 | -815  | 16927 | AN3811 |
| 1832 | CONTIG61 | 838804 | 839168 | 1.44 | 6.84E-02 | transcription_start_site | - | 838010 | 838010 | -976  | 16928 | AN3811 |
| 2697 | CONTIG61 | 840009 | 840733 | 1.13 | 1.93E-01 | transcription_start_site | - | 838171 | 838171 | -2200 | 16927 | AN3811 |
| 2697 | CONTIG61 | 840009 | 840733 | 1.13 | 1.93E-01 | transcription_start_site | - | 838010 | 838010 | -2361 | 16928 | AN3811 |
| 1832 | CONTIG61 | 838804 | 839168 | 1.44 | 6.84E-02 | transcription_start_site | + | 838932 | 838932 | 54    | 16930 | AN3812 |
| 1832 | CONTIG61 | 838804 | 839168 | 1.44 | 6.84E-02 | transcription_start_site | + | 838567 | 838567 | 419   | 16929 | AN3812 |
| 1832 | CONTIG61 | 838804 | 839168 | 1.44 | 6.84E-02 | transcription_start_site | + | 840297 | 840297 | -1311 | 16931 | AN3813 |
| 1832 | CONTIG61 | 838804 | 839168 | 1.44 | 6.84E-02 | transcription_start_site | + | 840417 | 840417 | -1431 | 16932 | AN3813 |
| 1832 | CONTIG61 | 838804 | 839168 | 1.44 | 6.84E-02 | transcription_start_site | + | 840511 | 840511 | -1525 | 16933 | AN3813 |

|      |          |        |        |      |          |                          |   |        |        |       |       |        |
|------|----------|--------|--------|------|----------|--------------------------|---|--------|--------|-------|-------|--------|
| 1832 | CONTIG61 | 838804 | 839168 | 1.44 | 6.84E-02 | transcription_start_site | + | 841163 | 841163 | -2177 | 16934 | AN3813 |
| 2697 | CONTIG61 | 840009 | 840733 | 1.13 | 1.93E-01 | transcription_start_site | + | 840417 | 840417 | -46   | 16932 | AN3813 |
| 2697 | CONTIG61 | 840009 | 840733 | 1.13 | 1.93E-01 | transcription_start_site | + | 840297 | 840297 | 74    | 16931 | AN3813 |
| 2697 | CONTIG61 | 840009 | 840733 | 1.13 | 1.93E-01 | transcription_start_site | + | 840511 | 840511 | -140  | 16933 | AN3813 |
| 2697 | CONTIG61 | 840009 | 840733 | 1.13 | 1.93E-01 | transcription_start_site | + | 841163 | 841163 | -792  | 16934 | AN3813 |
| 1201 | CONTIG61 | 852839 | 853108 | 1.76 | 2.12E-02 | transcription_start_site | - | 851966 | 851966 | -1007 | 16943 | AN3817 |
| 1201 | CONTIG61 | 852839 | 853108 | 1.76 | 2.12E-02 | transcription_start_site | - | 851566 | 851566 | -1407 | 16944 | AN3817 |
| 1201 | CONTIG61 | 852839 | 853108 | 1.76 | 2.12E-02 | transcription_start_site | - | 851150 | 851150 | -1823 | 16945 | AN3817 |
| 1201 | CONTIG61 | 852839 | 853108 | 1.76 | 2.12E-02 | transcription_start_site | - | 848789 | 848789 | -4184 | 16946 | AN3817 |
| 1201 | CONTIG61 | 852839 | 853108 | 1.76 | 2.12E-02 | transcription_start_site | + | 855771 | 855771 | -2797 | 16947 | AN3818 |
| 1911 | CONTIG62 | 3691   | 3965   | 1.4  | 3.08E-02 | transcription_start_site | + | 3106   | 3106   | 722   | 16960 | AN3822 |
| 1911 | CONTIG62 | 3691   | 3965   | 1.4  | 3.08E-02 | transcription_start_site | + | 2701   | 2701   | 1127  | 16959 | AN3822 |
| 2973 | CONTIG62 | 526    | 895    | 0.95 | 1.93E-01 | transcription_start_site | + | 2391   | 2391   | -1680 | 16958 | AN3822 |
| 2973 | CONTIG62 | 526    | 895    | 0.95 | 1.93E-01 | transcription_start_site | + | 2701   | 2701   | -1990 | 16959 | AN3822 |
| 2973 | CONTIG62 | 526    | 895    | 0.95 | 1.93E-01 | transcription_start_site | + | 3106   | 3106   | -2395 | 16960 | AN3822 |
| 1911 | CONTIG62 | 3691   | 3965   | 1.4  | 3.08E-02 | transcription_start_site | + | 3962   | 3962   | -134  | 16961 | AN3823 |
| 1911 | CONTIG62 | 3691   | 3965   | 1.4  | 3.08E-02 | transcription_start_site | + | 4255   | 4255   | -427  | 16962 | AN3823 |
| 2973 | CONTIG62 | 526    | 895    | 0.95 | 1.93E-01 | transcription_start_site | + | 3962   | 3962   | -3251 | 16961 | AN3823 |
| 2973 | CONTIG62 | 526    | 895    | 0.95 | 1.93E-01 | transcription_start_site | + | 4255   | 4255   | -3544 | 16962 | AN3823 |
| 1068 | CONTIG62 | 31958  | 32532  | 1.85 | 3.61E-03 | transcription_start_site | - | 30721  | 30721  | -1524 | 16990 | AN3833 |
| 1068 | CONTIG62 | 31958  | 32532  | 1.85 | 3.61E-03 | transcription_start_site | - | 30535  | 30535  | -1710 | 16991 | AN3833 |
| 1068 | CONTIG62 | 31958  | 32532  | 1.85 | 3.61E-03 | transcription_start_site | - | 30406  | 30406  | -1839 | 16992 | AN3833 |
| 1068 | CONTIG62 | 31958  | 32532  | 1.85 | 3.61E-03 | transcription_start_site | - | 30151  | 30151  | -2094 | 16993 | AN3833 |
| 1068 | CONTIG62 | 31958  | 32532  | 1.85 | 3.61E-03 | transcription_start_site | - | 29289  | 29289  | -2956 | 16994 | AN3833 |
| 1068 | CONTIG62 | 31958  | 32532  | 1.85 | 3.61E-03 | transcription_start_site | + | 31584  | 31584  | 661   | 16997 | AN3834 |
| 1068 | CONTIG62 | 31958  | 32532  | 1.85 | 3.61E-03 | transcription_start_site | + | 31219  | 31219  | 1026  | 16996 | AN3834 |
| 1068 | CONTIG62 | 31958  | 32532  | 1.85 | 3.61E-03 | transcription_start_site | + | 31156  | 31156  | 1089  | 16995 | AN3834 |
| 1068 | CONTIG62 | 31958  | 32532  | 1.85 | 3.61E-03 | transcription_start_site | + | 36671  | 36671  | -4426 | 16998 | AN3835 |
| 1068 | CONTIG62 | 31958  | 32532  | 1.85 | 3.61E-03 | transcription_start_site | + | 36825  | 36825  | -4580 | 16999 | AN3835 |
| 1068 | CONTIG62 | 31958  | 32532  | 1.85 | 3.61E-03 | transcription_start_site | + | 36965  | 36965  | -4720 | 17000 | AN3835 |
| 2943 | CONTIG62 | 36226  | 36575  | 0.98 | 1.66E-01 | transcription_start_site | + | 36671  | 36671  | -270  | 16998 | AN3835 |
| 2943 | CONTIG62 | 36226  | 36575  | 0.98 | 1.66E-01 | transcription_start_site | + | 36825  | 36825  | -424  | 16999 | AN3835 |
| 2943 | CONTIG62 | 36226  | 36575  | 0.98 | 1.66E-01 | transcription_start_site | + | 36965  | 36965  | -564  | 17000 | AN3835 |
| 2943 | CONTIG62 | 36226  | 36575  | 0.98 | 1.66E-01 | transcription_start_site | + | 37938  | 37938  | -1537 | 17001 | AN3835 |
| 2943 | CONTIG62 | 36226  | 36575  | 0.98 | 1.66E-01 | transcription_start_site | + | 38687  | 38687  | -2286 | 17002 | AN3835 |
| 2968 | CONTIG62 | 39988  | 40942  | 0.95 | 1.79E-01 | transcription_start_site | - | 40525  | 40525  | 60    | 17003 | AN3836 |
| 2943 | CONTIG62 | 36226  | 36575  | 0.98 | 1.66E-01 | transcription_start_site | + | 40913  | 40913  | -4512 | 17004 | AN3837 |
| 2968 | CONTIG62 | 39988  | 40942  | 0.95 | 1.79E-01 | transcription_start_site | + | 40913  | 40913  | -448  | 17004 | AN3837 |
| 2968 | CONTIG62 | 39988  | 40942  | 0.95 | 1.79E-01 | transcription_start_site | + | 42499  | 42499  | -2034 | 17005 | AN3837 |
| 2809 | CONTIG62 | 52731  | 53094  | 1.06 | 1.25E-01 | transcription_start_site | - | 49860  | 49860  | -3052 | 17013 | AN3840 |
| 2809 | CONTIG62 | 52731  | 53094  | 1.06 | 1.25E-01 | transcription_start_site | - | 49789  | 49789  | -3123 | 17014 | AN3840 |
| 2809 | CONTIG62 | 52731  | 53094  | 1.06 | 1.25E-01 | transcription_start_site | - | 49581  | 49581  | -3331 | 17015 | AN3840 |
| 2809 | CONTIG62 | 52731  | 53094  | 1.06 | 1.25E-01 | transcription_start_site | - | 52629  | 52629  | -283  | 17016 | AN3841 |
| 2809 | CONTIG62 | 52731  | 53094  | 1.06 | 1.25E-01 | transcription_start_site | - | 52354  | 52354  | -558  | 17017 | AN3841 |
| 2809 | CONTIG62 | 52731  | 53094  | 1.06 | 1.25E-01 | transcription_start_site | - | 50563  | 50563  | -2349 | 17018 | AN3841 |
| 2809 | CONTIG62 | 52731  | 53094  | 1.06 | 1.25E-01 | transcription_start_site | + | 53246  | 53246  | -333  | 17019 | AN3842 |
| 2809 | CONTIG62 | 52731  | 53094  | 1.06 | 1.25E-01 | transcription_start_site | + | 53398  | 53398  | -485  | 17020 | AN3842 |
| 2809 | CONTIG62 | 52731  | 53094  | 1.06 | 1.25E-01 | transcription_start_site | + | 53475  | 53475  | -562  | 17021 | AN3842 |
| 2809 | CONTIG62 | 52731  | 53094  | 1.06 | 1.25E-01 | transcription_start_site | + | 53549  | 53549  | -636  | 17022 | AN3842 |
| 2809 | CONTIG62 | 52731  | 53094  | 1.06 | 1.25E-01 | transcription_start_site | + | 53806  | 53806  | -893  | 17023 | AN3842 |
| 2809 | CONTIG62 | 52731  | 53094  | 1.06 | 1.25E-01 | transcription_start_site | + | 55055  | 55055  | -2142 | 17024 | AN3843 |
| 2809 | CONTIG62 | 52731  | 53094  | 1.06 | 1.25E-01 | transcription_start_site | + | 55233  | 55233  | -2320 | 17025 | AN3843 |
| 2809 | CONTIG62 | 52731  | 53094  | 1.06 | 1.25E-01 | transcription_start_site | + | 55392  | 55392  | -2479 | 17026 | AN3843 |
| 2809 | CONTIG62 | 52731  | 53094  | 1.06 | 1.25E-01 | transcription_start_site | + | 57063  | 57063  | -4150 | 17027 | AN3843 |
| 2809 | CONTIG62 | 52731  | 53094  | 1.06 | 1.25E-01 | transcription_start_site | + | 57633  | 57633  | -4720 | 17028 | AN3844 |
| 489  | CONTIG62 | 63302  | 63738  | 2.46 | 0.00E+00 | transcription_start_site | - | 63795  | 63795  | 275   | 17030 | AN3845 |
| 489  | CONTIG62 | 63302  | 63738  | 2.46 | 0.00E+00 | transcription_start_site | - | 64111  | 64111  | 591   | 17029 | AN3845 |

|      |          |        |        |      |          |                          |   |        |        |       |       |        |
|------|----------|--------|--------|------|----------|--------------------------|---|--------|--------|-------|-------|--------|
| 2940 | CONTIG62 | 64579  | 65392  | 0.98 | 1.50E-01 | transcription_start_site | - | 64111  | 64111  | -874  | 17029 | AN3845 |
| 2940 | CONTIG62 | 64579  | 65392  | 0.98 | 1.50E-01 | transcription_start_site | - | 63795  | 63795  | -1190 | 17030 | AN3845 |
| 489  | CONTIG62 | 63302  | 63738  | 2.46 | 0.00E+00 | transcription_start_site | + | 64337  | 64337  | -817  | 17031 | AN3846 |
| 489  | CONTIG62 | 63302  | 63738  | 2.46 | 0.00E+00 | transcription_start_site | + | 64649  | 64649  | -1129 | 17032 | AN3846 |
| 2214 | CONTIG62 | 60677  | 61048  | 1.29 | 5.22E-02 | transcription_start_site | + | 64337  | 64337  | -3474 | 17031 | AN3846 |
| 2214 | CONTIG62 | 60677  | 61048  | 1.29 | 5.22E-02 | transcription_start_site | + | 64649  | 64649  | -3786 | 17032 | AN3846 |
| 2940 | CONTIG62 | 64579  | 65392  | 0.98 | 1.50E-01 | transcription_start_site | + | 64649  | 64649  | 336   | 17032 | AN3846 |
| 2940 | CONTIG62 | 64579  | 65392  | 0.98 | 1.50E-01 | transcription_start_site | + | 64337  | 64337  | 648   | 17031 | AN3846 |
| 2940 | CONTIG62 | 64579  | 65392  | 0.98 | 1.50E-01 | transcription_start_site | + | 68785  | 68785  | -3799 | 17033 | AN3848 |
| 2940 | CONTIG62 | 64579  | 65392  | 0.98 | 1.50E-01 | transcription_start_site | + | 68966  | 68966  | -3980 | 17034 | AN3848 |
| 2350 | CONTIG62 | 82576  | 82850  | 1.25 | 5.88E-02 | transcription_start_site | - | 79410  | 79410  | -3303 | 17045 | AN3853 |
| 2350 | CONTIG62 | 82576  | 82850  | 1.25 | 5.88E-02 | transcription_start_site | - | 78968  | 78968  | -3745 | 17046 | AN3853 |
| 2350 | CONTIG62 | 82576  | 82850  | 1.25 | 5.88E-02 | transcription_start_site | - | 83242  | 83242  | 529   | 17052 | AN3855 |
| 1912 | CONTIG62 | 110866 | 111275 | 1.4  | 3.08E-02 | transcription_start_site | - | 106966 | 106966 | -4104 | 17068 | AN3864 |
| 1912 | CONTIG62 | 110866 | 111275 | 1.4  | 3.08E-02 | transcription_start_site | - | 106869 | 106869 | -4201 | 17069 | AN3864 |
| 2464 | CONTIG62 | 105376 | 106100 | 1.21 | 4.42E-02 | transcription_start_site | - | 106869 | 106869 | 1131  | 17069 | AN3864 |
| 2464 | CONTIG62 | 105376 | 106100 | 1.21 | 4.42E-02 | transcription_start_site | - | 106966 | 106966 | 1228  | 17068 | AN3864 |
| 2464 | CONTIG62 | 105376 | 106100 | 1.21 | 4.42E-02 | transcription_start_site | + | 107244 | 107244 | -1506 | 17070 | AN3865 |
| 2464 | CONTIG62 | 105376 | 106100 | 1.21 | 4.42E-02 | transcription_start_site | + | 107500 | 107500 | -1762 | 17071 | AN3865 |
| 2464 | CONTIG62 | 105376 | 106100 | 1.21 | 4.42E-02 | transcription_start_site | + | 107667 | 107667 | -1929 | 17072 | AN3865 |
| 2464 | CONTIG62 | 105376 | 106100 | 1.21 | 4.42E-02 | transcription_start_site | + | 107797 | 107797 | -2059 | 17073 | AN3865 |
| 2464 | CONTIG62 | 105376 | 106100 | 1.21 | 4.42E-02 | transcription_start_site | + | 107931 | 107931 | -2193 | 17074 | AN3865 |
| 2464 | CONTIG62 | 105376 | 106100 | 1.21 | 4.42E-02 | transcription_start_site | + | 108107 | 108107 | -2369 | 17075 | AN3865 |
| 2464 | CONTIG62 | 105376 | 106100 | 1.21 | 4.42E-02 | transcription_start_site | + | 108515 | 108515 | -2777 | 17076 | AN3865 |
| 2464 | CONTIG62 | 105376 | 106100 | 1.21 | 4.42E-02 | transcription_start_site | + | 109042 | 109042 | -3304 | 17077 | AN3865 |
| 1912 | CONTIG62 | 110866 | 111275 | 1.4  | 3.08E-02 | transcription_start_site | + | 109986 | 109986 | 1084  | 17078 | AN3866 |
| 2464 | CONTIG62 | 105376 | 106100 | 1.21 | 4.42E-02 | transcription_start_site | + | 109986 | 109986 | -4248 | 17078 | AN3866 |
| 1912 | CONTIG62 | 110866 | 111275 | 1.4  | 3.08E-02 | transcription_start_site | - | 111408 | 111408 | 337   | 17083 | AN3867 |
| 1912 | CONTIG62 | 110866 | 111275 | 1.4  | 3.08E-02 | transcription_start_site | - | 111821 | 111821 | 750   | 17082 | AN3867 |
| 1912 | CONTIG62 | 110866 | 111275 | 1.4  | 3.08E-02 | transcription_start_site | - | 112156 | 112156 | 1085  | 17081 | AN3867 |
| 2036 | CONTIG62 | 114601 | 115030 | 1.36 | 3.70E-02 | transcription_start_site | - | 112582 | 112582 | -2233 | 17079 | AN3867 |
| 2036 | CONTIG62 | 114601 | 115030 | 1.36 | 3.70E-02 | transcription_start_site | - | 112311 | 112311 | -2504 | 17080 | AN3867 |
| 2036 | CONTIG62 | 114601 | 115030 | 1.36 | 3.70E-02 | transcription_start_site | - | 112156 | 112156 | -2659 | 17081 | AN3867 |
| 2036 | CONTIG62 | 114601 | 115030 | 1.36 | 3.70E-02 | transcription_start_site | - | 111821 | 111821 | -2994 | 17082 | AN3867 |
| 2036 | CONTIG62 | 114601 | 115030 | 1.36 | 3.70E-02 | transcription_start_site | - | 111408 | 111408 | -3407 | 17083 | AN3867 |
| 1912 | CONTIG62 | 110866 | 111275 | 1.4  | 3.08E-02 | transcription_start_site | + | 113216 | 113216 | -2145 | 17084 | AN3868 |
| 1912 | CONTIG62 | 110866 | 111275 | 1.4  | 3.08E-02 | transcription_start_site | + | 113323 | 113323 | -2252 | 17085 | AN3868 |
| 2036 | CONTIG62 | 114601 | 115030 | 1.36 | 3.70E-02 | transcription_start_site | + | 119640 | 119640 | -4824 | 17092 | AN3870 |
| 2036 | CONTIG62 | 114601 | 115030 | 1.36 | 3.70E-02 | transcription_start_site | + | 120000 | 120000 | -5184 | 17093 | AN3870 |
| 437  | CONTIG62 | 133371 | 133625 | 2.53 | 0.00E+00 | transcription_start_site | - | 130934 | 130934 | -2564 | 17104 | AN3874 |
| 437  | CONTIG62 | 133371 | 133625 | 2.53 | 0.00E+00 | transcription_start_site | - | 130829 | 130829 | -2669 | 17105 | AN3874 |
| 437  | CONTIG62 | 133371 | 133625 | 2.53 | 0.00E+00 | transcription_start_site | - | 132922 | 132922 | -576  | 17106 | AN3875 |
| 437  | CONTIG62 | 133371 | 133625 | 2.53 | 0.00E+00 | transcription_start_site | - | 132407 | 132407 | -1091 | 17107 | AN3875 |
| 437  | CONTIG62 | 133371 | 133625 | 2.53 | 0.00E+00 | transcription_start_site | - | 132130 | 132130 | -1368 | 17108 | AN3875 |
| 437  | CONTIG62 | 133371 | 133625 | 2.53 | 0.00E+00 | transcription_start_site | + | 133911 | 133911 | -413  | 17109 | AN3876 |
| 437  | CONTIG62 | 133371 | 133625 | 2.53 | 0.00E+00 | transcription_start_site | + | 134439 | 134439 | -941  | 17110 | AN3876 |
| 893  | CONTIG62 | 151143 | 151567 | 2    | 0.00E+00 | transcription_start_site | - | 151427 | 151427 | 72    | 17116 | AN3880 |
| 893  | CONTIG62 | 151143 | 151567 | 2    | 0.00E+00 | transcription_start_site | - | 151191 | 151191 | -164  | 17117 | AN3880 |
| 893  | CONTIG62 | 151143 | 151567 | 2    | 0.00E+00 | transcription_start_site | - | 150118 | 150118 | -1237 | 17118 | AN3880 |
| 893  | CONTIG62 | 151143 | 151567 | 2    | 0.00E+00 | transcription_start_site | + | 152920 | 152920 | -1565 | 17119 | AN3881 |
| 893  | CONTIG62 | 151143 | 151567 | 2    | 0.00E+00 | transcription_start_site | + | 155815 | 155815 | -4460 | 17120 | AN3881 |
| 1167 | CONTIG62 | 160668 | 161088 | 1.78 | 5.20E-03 | transcription_start_site | - | 158389 | 158389 | -2489 | 17121 | AN3882 |
| 1167 | CONTIG62 | 160668 | 161088 | 1.78 | 5.20E-03 | transcription_start_site | - | 156748 | 156748 | -4130 | 17122 | AN3882 |
| 1167 | CONTIG62 | 160668 | 161088 | 1.78 | 5.20E-03 | transcription_start_site | + | 162554 | 162554 | -1676 | 17123 | AN3883 |
| 1167 | CONTIG62 | 160668 | 161088 | 1.78 | 5.20E-03 | transcription_start_site | + | 162943 | 162943 | -2065 | 17124 | AN3883 |
| 1167 | CONTIG62 | 160668 | 161088 | 1.78 | 5.20E-03 | transcription_start_site | + | 163454 | 163454 | -2576 | 17125 | AN3883 |
| 2810 | CONTIG62 | 177532 | 177811 | 1.06 | 1.25E-01 | transcription_start_site | - | 177659 | 177659 | -12   | 17148 | AN3889 |



|      |          |        |        |      |          |                          |   |        |        |       |       |        |
|------|----------|--------|--------|------|----------|--------------------------|---|--------|--------|-------|-------|--------|
| 2810 | CONTIG62 | 177532 | 177811 | 1.06 | 1.25E-01 | transcription_start_site | - | 177476 | 177476 | -195  | 17149 | AN3889 |
| 2810 | CONTIG62 | 177532 | 177811 | 1.06 | 1.25E-01 | transcription_start_site | - | 176698 | 176698 | -973  | 17150 | AN3889 |
| 1762 | CONTIG62 | 184142 | 184493 | 1.47 | 1.06E-02 | transcription_start_site | - | 181288 | 181288 | -3029 | 17151 | AN3890 |
| 1762 | CONTIG62 | 184142 | 184493 | 1.47 | 1.06E-02 | transcription_start_site | - | 180639 | 180639 | -3678 | 17152 | AN3890 |
| 1762 | CONTIG62 | 184142 | 184493 | 1.47 | 1.06E-02 | transcription_start_site | - | 180433 | 180433 | -3884 | 17153 | AN3890 |
| 1762 | CONTIG62 | 184142 | 184493 | 1.47 | 1.06E-02 | transcription_start_site | - | 180041 | 180041 | -4276 | 17154 | AN3890 |
| 1762 | CONTIG62 | 184142 | 184493 | 1.47 | 1.06E-02 | transcription_start_site | - | 184392 | 184392 | 74    | 17156 | AN3891 |
| 1762 | CONTIG62 | 184142 | 184493 | 1.47 | 1.06E-02 | transcription_start_site | - | 184534 | 184534 | 216   | 17155 | AN3891 |
| 1762 | CONTIG62 | 184142 | 184493 | 1.47 | 1.06E-02 | transcription_start_site | - | 184070 | 184070 | -247  | 17157 | AN3891 |
| 1762 | CONTIG62 | 184142 | 184493 | 1.47 | 1.06E-02 | transcription_start_site | - | 183599 | 183599 | -718  | 17158 | AN3891 |
| 1762 | CONTIG62 | 184142 | 184493 | 1.47 | 1.06E-02 | transcription_start_site | + | 187319 | 187319 | -3001 | 17159 | AN3892 |
| 1762 | CONTIG62 | 184142 | 184493 | 1.47 | 1.06E-02 | transcription_start_site | + | 187419 | 187419 | -3101 | 17160 | AN3892 |
| 1762 | CONTIG62 | 184142 | 184493 | 1.47 | 1.06E-02 | transcription_start_site | + | 187606 | 187606 | -3288 | 17161 | AN3892 |
| 549  | CONTIG62 | 195237 | 195656 | 2.38 | 0.00E+00 | transcription_start_site | + | 197834 | 197834 | -2387 | 17175 | AN3895 |
| 549  | CONTIG62 | 195237 | 195656 | 2.38 | 0.00E+00 | transcription_start_site | + | 198238 | 198238 | -2791 | 17176 | AN3895 |
| 549  | CONTIG62 | 195237 | 195656 | 2.38 | 0.00E+00 | transcription_start_site | + | 198590 | 198590 | -3143 | 17177 | AN3895 |
| 549  | CONTIG62 | 195237 | 195656 | 2.38 | 0.00E+00 | transcription_start_site | + | 199142 | 199142 | -3695 | 17178 | AN3895 |
| 10   | CONTIG63 | 7291   | 7550   | 3.69 | 0.00E+00 | transcription_start_site | - | 2975   | 2975   | -4445 | 17181 | AN3897 |
| 10   | CONTIG63 | 7291   | 7550   | 3.69 | 0.00E+00 | transcription_start_site | - | 2782   | 2782   | -4638 | 17182 | AN3897 |
| 2044 | CONTIG63 | 6001   | 6666   | 1.36 | 1.07E-01 | transcription_start_site | - | 2975   | 2975   | -3358 | 17181 | AN3897 |
| 2044 | CONTIG63 | 6001   | 6666   | 1.36 | 1.07E-01 | transcription_start_site | - | 2782   | 2782   | -3551 | 17182 | AN3897 |
| 10   | CONTIG63 | 7291   | 7550   | 3.69 | 0.00E+00 | transcription_start_site | - | 4857   | 4857   | -2563 | 17183 | AN3898 |
| 10   | CONTIG63 | 7291   | 7550   | 3.69 | 0.00E+00 | transcription_start_site | - | 4560   | 4560   | -2860 | 17184 | AN3898 |
| 10   | CONTIG63 | 7291   | 7550   | 3.69 | 0.00E+00 | transcription_start_site | - | 4090   | 4090   | -3330 | 17185 | AN3898 |
| 10   | CONTIG63 | 7291   | 7550   | 3.69 | 0.00E+00 | transcription_start_site | - | 3924   | 3924   | -3496 | 17186 | AN3898 |
| 1080 | CONTIG63 | 9676   | 9950   | 1.85 | 2.62E-02 | transcription_start_site | - | 4857   | 4857   | -4956 | 17183 | AN3898 |
| 2044 | CONTIG63 | 6001   | 6666   | 1.36 | 1.07E-01 | transcription_start_site | - | 4857   | 4857   | -1476 | 17183 | AN3898 |
| 2044 | CONTIG63 | 6001   | 6666   | 1.36 | 1.07E-01 | transcription_start_site | - | 4560   | 4560   | -1773 | 17184 | AN3898 |
| 2044 | CONTIG63 | 6001   | 6666   | 1.36 | 1.07E-01 | transcription_start_site | - | 4090   | 4090   | -2243 | 17185 | AN3898 |
| 2044 | CONTIG63 | 6001   | 6666   | 1.36 | 1.07E-01 | transcription_start_site | - | 3924   | 3924   | -2409 | 17186 | AN3898 |
| 914  | CONTIG63 | 13971  | 14241  | 1.99 | 1.57E-02 | transcription_start_site | - | 11691  | 11691  | -2415 | 17187 | AN3900 |
| 914  | CONTIG63 | 13971  | 14241  | 1.99 | 1.57E-02 | transcription_start_site | - | 11483  | 11483  | -2623 | 17188 | AN3900 |
| 914  | CONTIG63 | 13971  | 14241  | 1.99 | 1.57E-02 | transcription_start_site | - | 11324  | 11324  | -2782 | 17189 | AN3900 |
| 914  | CONTIG63 | 13971  | 14241  | 1.99 | 1.57E-02 | transcription_start_site | - | 10446  | 10446  | -3660 | 17190 | AN3900 |
| 914  | CONTIG63 | 13971  | 14241  | 1.99 | 1.57E-02 | transcription_start_site | - | 10305  | 10305  | -3801 | 17191 | AN3900 |
| 1080 | CONTIG63 | 9676   | 9950   | 1.85 | 2.62E-02 | transcription_start_site | - | 10305  | 10305  | 492   | 17191 | AN3900 |
| 1080 | CONTIG63 | 9676   | 9950   | 1.85 | 2.62E-02 | transcription_start_site | - | 10446  | 10446  | 633   | 17190 | AN3900 |
| 914  | CONTIG63 | 13971  | 14241  | 1.99 | 1.57E-02 | transcription_start_site | - | 13896  | 13896  | -210  | 17192 | AN3901 |
| 914  | CONTIG63 | 13971  | 14241  | 1.99 | 1.57E-02 | transcription_start_site | - | 13729  | 13729  | -377  | 17193 | AN3901 |
| 914  | CONTIG63 | 13971  | 14241  | 1.99 | 1.57E-02 | transcription_start_site | - | 13357  | 13357  | -749  | 17194 | AN3901 |
| 1081 | CONTIG63 | 33527  | 33801  | 1.85 | 2.62E-02 | transcription_start_site | - | 30643  | 30643  | -3021 | 17201 | AN3905 |
| 1081 | CONTIG63 | 33527  | 33801  | 1.85 | 2.62E-02 | transcription_start_site | - | 29959  | 29959  | -3705 | 17202 | AN3905 |
| 1081 | CONTIG63 | 33527  | 33801  | 1.85 | 2.62E-02 | transcription_start_site | - | 29545  | 29545  | -4119 | 17203 | AN3905 |
| 1081 | CONTIG63 | 33527  | 33801  | 1.85 | 2.62E-02 | transcription_start_site | - | 29300  | 29300  | -4364 | 17204 | AN3905 |
| 1081 | CONTIG63 | 33527  | 33801  | 1.85 | 2.62E-02 | transcription_start_site | + | 34606  | 34606  | -942  | 17205 | AN3906 |
| 1081 | CONTIG63 | 33527  | 33801  | 1.85 | 2.62E-02 | transcription_start_site | + | 37996  | 37996  | -4332 | 17206 | AN3906 |
| 1081 | CONTIG63 | 33527  | 33801  | 1.85 | 2.62E-02 | transcription_start_site | + | 38115  | 38115  | -4451 | 17207 | AN3906 |
| 2654 | CONTIG64 | 13729  | 14153  | 1.14 | 6.84E-02 | transcription_start_site | + | 15666  | 15666  | -1725 | 17213 | AN3910 |
| 2654 | CONTIG64 | 13729  | 14153  | 1.14 | 6.84E-02 | transcription_start_site | + | 17291  | 17291  | -3350 | 17214 | AN3910 |
| 1151 | CONTIG64 | 18919  | 19193  | 1.79 | 3.03E-03 | transcription_start_site | + | 21241  | 21241  | -2185 | 17215 | AN3911 |
| 1151 | CONTIG64 | 18919  | 19193  | 1.79 | 3.03E-03 | transcription_start_site | + | 21523  | 21523  | -2467 | 17216 | AN3911 |
| 2987 | CONTIG64 | 69165  | 69729  | 0.93 | 1.66E-01 | transcription_start_site | + | 68498  | 68498  | 949   | 17250 | AN3924 |
| 2987 | CONTIG64 | 69165  | 69729  | 0.93 | 1.66E-01 | transcription_start_site | + | 68217  | 68217  | 1230  | 17249 | AN3924 |
| 2987 | CONTIG64 | 69165  | 69729  | 0.93 | 1.66E-01 | transcription_start_site | + | 72300  | 72300  | -2853 | 17251 | AN3925 |
| 2028 | CONTIG64 | 73435  | 74469  | 1.36 | 1.44E-02 | transcription_start_site | - | 74650  | 74650  | 698   | 17254 | AN3926 |
| 2028 | CONTIG64 | 73435  | 74469  | 1.36 | 1.44E-02 | transcription_start_site | - | 74861  | 74861  | 909   | 17253 | AN3926 |
| 2556 | CONTIG64 | 74870  | 75129  | 1.18 | 5.88E-02 | transcription_start_site | - | 74861  | 74861  | -138  | 17253 | AN3926 |

|      |          |        |        |      |          |                          |   |        |        |       |       |        |
|------|----------|--------|--------|------|----------|--------------------------|---|--------|--------|-------|-------|--------|
| 2556 | CONTIG64 | 74870  | 75129  | 1.18 | 5.88E-02 | transcription_start_site | - | 74650  | 74650  | -349  | 17254 | AN3926 |
| 2556 | CONTIG64 | 74870  | 75129  | 1.18 | 5.88E-02 | transcription_start_site | - | 75489  | 75489  | 489   | 17252 | AN3926 |
| 2982 | CONTIG64 | 75380  | 76719  | 0.93 | 9.40E-02 | transcription_start_site | - | 75489  | 75489  | -560  | 17252 | AN3926 |
| 2982 | CONTIG64 | 75380  | 76719  | 0.93 | 9.40E-02 | transcription_start_site | - | 74861  | 74861  | -1188 | 17253 | AN3926 |
| 2982 | CONTIG64 | 75380  | 76719  | 0.93 | 9.40E-02 | transcription_start_site | - | 74650  | 74650  | -1399 | 17254 | AN3926 |
| 2028 | CONTIG64 | 73435  | 74469  | 1.36 | 1.44E-02 | transcription_start_site | + | 75686  | 75686  | -1734 | 17255 | AN3927 |
| 2556 | CONTIG64 | 74870  | 75129  | 1.18 | 5.88E-02 | transcription_start_site | + | 75686  | 75686  | -686  | 17255 | AN3927 |
| 2982 | CONTIG64 | 75380  | 76719  | 0.93 | 9.40E-02 | transcription_start_site | + | 75686  | 75686  | 363   | 17255 | AN3927 |
| 1788 | CONTIG64 | 84676  | 84960  | 1.46 | 1.57E-02 | transcription_start_site | + | 84730  | 84730  | 88    | 17258 | AN3930 |
| 486  | CONTIG64 | 87241  | 87650  | 2.46 | 0.00E+00 | transcription_start_site | + | 87779  | 87779  | -333  | 17259 | AN3931 |
| 486  | CONTIG64 | 87241  | 87650  | 2.46 | 0.00E+00 | transcription_start_site | + | 87838  | 87838  | -392  | 17260 | AN3931 |
| 486  | CONTIG64 | 87241  | 87650  | 2.46 | 0.00E+00 | transcription_start_site | + | 88402  | 88402  | -956  | 17261 | AN3931 |
| 1788 | CONTIG64 | 84676  | 84960  | 1.46 | 1.57E-02 | transcription_start_site | + | 87779  | 87779  | -2961 | 17259 | AN3931 |
| 1788 | CONTIG64 | 84676  | 84960  | 1.46 | 1.57E-02 | transcription_start_site | + | 87838  | 87838  | -3020 | 17260 | AN3931 |
| 1788 | CONTIG64 | 84676  | 84960  | 1.46 | 1.57E-02 | transcription_start_site | + | 88402  | 88402  | -3584 | 17261 | AN3931 |
| 486  | CONTIG64 | 87241  | 87650  | 2.46 | 0.00E+00 | transcription_start_site | + | 89446  | 89446  | -2000 | 17262 | AN3932 |
| 486  | CONTIG64 | 87241  | 87650  | 2.46 | 0.00E+00 | transcription_start_site | + | 89733  | 89733  | -2287 | 17263 | AN3932 |
| 486  | CONTIG64 | 87241  | 87650  | 2.46 | 0.00E+00 | transcription_start_site | + | 89901  | 89901  | -2455 | 17264 | AN3932 |
| 486  | CONTIG64 | 87241  | 87650  | 2.46 | 0.00E+00 | transcription_start_site | + | 90114  | 90114  | -2668 | 17265 | AN3932 |
| 486  | CONTIG64 | 87241  | 87650  | 2.46 | 0.00E+00 | transcription_start_site | + | 90212  | 90212  | -2766 | 17266 | AN3932 |
| 486  | CONTIG64 | 87241  | 87650  | 2.46 | 0.00E+00 | transcription_start_site | + | 90381  | 90381  | -2935 | 17267 | AN3932 |
| 1788 | CONTIG64 | 84676  | 84960  | 1.46 | 1.57E-02 | transcription_start_site | + | 89446  | 89446  | -4628 | 17262 | AN3932 |
| 1788 | CONTIG64 | 84676  | 84960  | 1.46 | 1.57E-02 | transcription_start_site | + | 89733  | 89733  | -4915 | 17263 | AN3932 |
| 1788 | CONTIG64 | 84676  | 84960  | 1.46 | 1.57E-02 | transcription_start_site | + | 89901  | 89901  | -5083 | 17264 | AN3932 |
| 1514 | CONTIG64 | 98716  | 98990  | 1.57 | 8.81E-03 | transcription_start_site | - | 94879  | 94879  | -3974 | 17268 | AN3933 |
| 1514 | CONTIG64 | 98716  | 98990  | 1.57 | 8.81E-03 | transcription_start_site | - | 94328  | 94328  | -4525 | 17269 | AN3933 |
| 1850 | CONTIG64 | 98101  | 98398  | 1.43 | 1.84E-02 | transcription_start_site | - | 94879  | 94879  | -3370 | 17268 | AN3933 |
| 1850 | CONTIG64 | 98101  | 98398  | 1.43 | 1.84E-02 | transcription_start_site | - | 94328  | 94328  | -3921 | 17269 | AN3933 |
| 2466 | CONTIG64 | 95926  | 96895  | 1.21 | 5.22E-02 | transcription_start_site | - | 94879  | 94879  | -1531 | 17268 | AN3933 |
| 2466 | CONTIG64 | 95926  | 96895  | 1.21 | 5.22E-02 | transcription_start_site | - | 94328  | 94328  | -2082 | 17269 | AN3933 |
| 2466 | CONTIG64 | 95926  | 96895  | 1.21 | 5.22E-02 | transcription_start_site | - | 91823  | 91823  | -4587 | 17270 | AN3933 |
| 2466 | CONTIG64 | 95926  | 96895  | 1.21 | 5.22E-02 | transcription_start_site | + | 96348  | 96348  | 62    | 17272 | AN3934 |
| 2466 | CONTIG64 | 95926  | 96895  | 1.21 | 5.22E-02 | transcription_start_site | + | 96565  | 96565  | -154  | 17273 | AN3934 |
| 2466 | CONTIG64 | 95926  | 96895  | 1.21 | 5.22E-02 | transcription_start_site | + | 96197  | 96197  | 213   | 17271 | AN3934 |
| 2466 | CONTIG64 | 95926  | 96895  | 1.21 | 5.22E-02 | transcription_start_site | + | 96682  | 96682  | -271  | 17274 | AN3934 |
| 2466 | CONTIG64 | 95926  | 96895  | 1.21 | 5.22E-02 | transcription_start_site | + | 96802  | 96802  | -391  | 17275 | AN3934 |
| 1514 | CONTIG64 | 98716  | 98990  | 1.57 | 8.81E-03 | transcription_start_site | + | 98846  | 98846  | 7     | 17278 | AN3935 |
| 1514 | CONTIG64 | 98716  | 98990  | 1.57 | 8.81E-03 | transcription_start_site | + | 98667  | 98667  | 186   | 17277 | AN3935 |
| 1514 | CONTIG64 | 98716  | 98990  | 1.57 | 8.81E-03 | transcription_start_site | + | 98529  | 98529  | 324   | 17276 | AN3935 |
| 1850 | CONTIG64 | 98101  | 98398  | 1.43 | 1.84E-02 | transcription_start_site | + | 98529  | 98529  | -279  | 17276 | AN3935 |
| 1850 | CONTIG64 | 98101  | 98398  | 1.43 | 1.84E-02 | transcription_start_site | + | 98667  | 98667  | -417  | 17277 | AN3935 |
| 1850 | CONTIG64 | 98101  | 98398  | 1.43 | 1.84E-02 | transcription_start_site | + | 98846  | 98846  | -596  | 17278 | AN3935 |
| 2466 | CONTIG64 | 95926  | 96895  | 1.21 | 5.22E-02 | transcription_start_site | + | 98529  | 98529  | -2118 | 17276 | AN3935 |
| 2466 | CONTIG64 | 95926  | 96895  | 1.21 | 5.22E-02 | transcription_start_site | + | 98667  | 98667  | -2256 | 17277 | AN3935 |
| 2466 | CONTIG64 | 95926  | 96895  | 1.21 | 5.22E-02 | transcription_start_site | + | 98846  | 98846  | -2435 | 17278 | AN3935 |
| 1514 | CONTIG64 | 98716  | 98990  | 1.57 | 8.81E-03 | transcription_start_site | + | 100708 | 100708 | -1855 | 17279 | AN3936 |
| 1514 | CONTIG64 | 98716  | 98990  | 1.57 | 8.81E-03 | transcription_start_site | + | 100874 | 100874 | -2021 | 17280 | AN3936 |
| 1850 | CONTIG64 | 98101  | 98398  | 1.43 | 1.84E-02 | transcription_start_site | + | 100708 | 100708 | -2458 | 17279 | AN3936 |
| 1850 | CONTIG64 | 98101  | 98398  | 1.43 | 1.84E-02 | transcription_start_site | + | 100874 | 100874 | -2624 | 17280 | AN3936 |
| 2466 | CONTIG64 | 95926  | 96895  | 1.21 | 5.22E-02 | transcription_start_site | + | 100708 | 100708 | -4297 | 17279 | AN3936 |
| 2466 | CONTIG64 | 95926  | 96895  | 1.21 | 5.22E-02 | transcription_start_site | + | 100874 | 100874 | -4463 | 17280 | AN3936 |
| 896  | CONTIG64 | 103126 | 103405 | 2    | 9.51E-04 | transcription_start_site | - | 104064 | 104064 | 798   | 17282 | AN3937 |
| 896  | CONTIG64 | 103126 | 103405 | 2    | 9.51E-04 | transcription_start_site | - | 104125 | 104125 | 859   | 17281 | AN3937 |
| 896  | CONTIG64 | 103126 | 103405 | 2    | 9.51E-04 | transcription_start_site | + | 104544 | 104544 | -1278 | 17283 | AN3938 |
| 896  | CONTIG64 | 103126 | 103405 | 2    | 9.51E-04 | transcription_start_site | + | 105944 | 105944 | -2678 | 17284 | AN3938 |
| 2207 | CONTIG64 | 121213 | 121712 | 1.29 | 1.86E-02 | transcription_start_site | - | 117761 | 117761 | -3701 | 17289 | AN3940 |
| 2207 | CONTIG64 | 121213 | 121712 | 1.29 | 1.86E-02 | transcription_start_site | - | 117519 | 117519 | -3943 | 17290 | AN3940 |

|      |          |        |        |      |          |                          |   |        |        |       |       |        |
|------|----------|--------|--------|------|----------|--------------------------|---|--------|--------|-------|-------|--------|
| 2958 | CONTIG64 | 117537 | 117826 | 0.96 | 1.44E-01 | transcription_start_site | - | 117761 | 117761 | 79    | 17289 | AN3940 |
| 2958 | CONTIG64 | 117537 | 117826 | 0.96 | 1.44E-01 | transcription_start_site | - | 117519 | 117519 | -162  | 17290 | AN3940 |
| 2207 | CONTIG64 | 121213 | 121712 | 1.29 | 1.86E-02 | transcription_start_site | - | 120620 | 120620 | -842  | 17291 | AN3941 |
| 2207 | CONTIG64 | 121213 | 121712 | 1.29 | 1.86E-02 | transcription_start_site | - | 120286 | 120286 | -1176 | 17292 | AN3941 |
| 2207 | CONTIG64 | 121213 | 121712 | 1.29 | 1.86E-02 | transcription_start_site | - | 120163 | 120163 | -1299 | 17293 | AN3941 |
| 2207 | CONTIG64 | 121213 | 121712 | 1.29 | 1.86E-02 | transcription_start_site | - | 119873 | 119873 | -1589 | 17294 | AN3941 |
| 2898 | CONTIG64 | 140944 | 141213 | 1    | 1.25E-01 | transcription_start_site | + | 140804 | 140804 | 274   | 17304 | AN3945 |
| 2839 | CONTIG64 | 151514 | 152018 | 1.04 | 8.36E-02 | transcription_start_site | - | 148460 | 148460 | -3306 | 17305 | AN3946 |
| 2839 | CONTIG64 | 151514 | 152018 | 1.04 | 8.36E-02 | transcription_start_site | - | 147360 | 147360 | -4406 | 17306 | AN3946 |
| 2839 | CONTIG64 | 151514 | 152018 | 1.04 | 8.36E-02 | transcription_start_site | - | 146866 | 146866 | -4900 | 17307 | AN3946 |
| 2839 | CONTIG64 | 151514 | 152018 | 1.04 | 8.36E-02 | transcription_start_site | + | 153729 | 153729 | -1963 | 17313 | AN3948 |
| 2839 | CONTIG64 | 151514 | 152018 | 1.04 | 8.36E-02 | transcription_start_site | + | 154204 | 154204 | -2438 | 17314 | AN3948 |
| 2030 | CONTIG64 | 176343 | 176827 | 1.36 | 2.62E-02 | transcription_start_site | - | 173558 | 173558 | -3027 | 17333 | AN3952 |
| 2030 | CONTIG64 | 176343 | 176827 | 1.36 | 2.62E-02 | transcription_start_site | - | 172862 | 172862 | -3723 | 17334 | AN3952 |
| 2030 | CONTIG64 | 176343 | 176827 | 1.36 | 2.62E-02 | transcription_start_site | - | 172747 | 172747 | -3838 | 17335 | AN3952 |
| 2030 | CONTIG64 | 176343 | 176827 | 1.36 | 2.62E-02 | transcription_start_site | - | 171780 | 171780 | -4805 | 17336 | AN3952 |
| 2030 | CONTIG64 | 176343 | 176827 | 1.36 | 2.62E-02 | transcription_start_site | - | 171623 | 171623 | -4962 | 17337 | AN3952 |
| 2030 | CONTIG64 | 176343 | 176827 | 1.36 | 2.62E-02 | transcription_start_site | - | 171483 | 171483 | -5102 | 17338 | AN3952 |
| 2899 | CONTIG64 | 177768 | 178327 | 1    | 1.25E-01 | transcription_start_site | - | 173558 | 173558 | -4489 | 17333 | AN3952 |
| 2899 | CONTIG64 | 177768 | 178327 | 1    | 1.25E-01 | transcription_start_site | - | 172862 | 172862 | -5185 | 17334 | AN3952 |
| 2030 | CONTIG64 | 176343 | 176827 | 1.36 | 2.62E-02 | transcription_start_site | - | 176865 | 176865 | 280   | 17347 | AN3953 |
| 2208 | CONTIG64 | 179028 | 180142 | 1.29 | 2.18E-02 | transcription_start_site | - | 176865 | 176865 | -2720 | 17347 | AN3953 |
| 2899 | CONTIG64 | 177768 | 178327 | 1    | 1.25E-01 | transcription_start_site | - | 176865 | 176865 | -1182 | 17347 | AN3953 |
| 2030 | CONTIG64 | 176343 | 176827 | 1.36 | 2.62E-02 | transcription_start_site | + | 178271 | 178271 | -1686 | 17348 | AN3954 |
| 2030 | CONTIG64 | 176343 | 176827 | 1.36 | 2.62E-02 | transcription_start_site | + | 178621 | 178621 | -2036 | 17349 | AN3954 |
| 2030 | CONTIG64 | 176343 | 176827 | 1.36 | 2.62E-02 | transcription_start_site | + | 178825 | 178825 | -2240 | 17350 | AN3954 |
| 2030 | CONTIG64 | 176343 | 176827 | 1.36 | 2.62E-02 | transcription_start_site | + | 179322 | 179322 | -2737 | 17351 | AN3954 |
| 2030 | CONTIG64 | 176343 | 176827 | 1.36 | 2.62E-02 | transcription_start_site | + | 179802 | 179802 | -3217 | 17352 | AN3954 |
| 2208 | CONTIG64 | 179028 | 180142 | 1.29 | 2.18E-02 | transcription_start_site | + | 179802 | 179802 | -217  | 17352 | AN3954 |
| 2208 | CONTIG64 | 179028 | 180142 | 1.29 | 2.18E-02 | transcription_start_site | + | 179322 | 179322 | 263   | 17351 | AN3954 |
| 2208 | CONTIG64 | 179028 | 180142 | 1.29 | 2.18E-02 | transcription_start_site | + | 178825 | 178825 | 760   | 17350 | AN3954 |
| 2208 | CONTIG64 | 179028 | 180142 | 1.29 | 2.18E-02 | transcription_start_site | + | 178621 | 178621 | 964   | 17349 | AN3954 |
| 2208 | CONTIG64 | 179028 | 180142 | 1.29 | 2.18E-02 | transcription_start_site | + | 178271 | 178271 | 1314  | 17348 | AN3954 |
| 2899 | CONTIG64 | 177768 | 178327 | 1    | 1.25E-01 | transcription_start_site | + | 178271 | 178271 | -223  | 17348 | AN3954 |
| 2899 | CONTIG64 | 177768 | 178327 | 1    | 1.25E-01 | transcription_start_site | + | 178621 | 178621 | -573  | 17349 | AN3954 |
| 2899 | CONTIG64 | 177768 | 178327 | 1    | 1.25E-01 | transcription_start_site | + | 178825 | 178825 | -777  | 17350 | AN3954 |
| 2899 | CONTIG64 | 177768 | 178327 | 1    | 1.25E-01 | transcription_start_site | + | 179322 | 179322 | -1274 | 17351 | AN3954 |
| 2899 | CONTIG64 | 177768 | 178327 | 1    | 1.25E-01 | transcription_start_site | + | 179802 | 179802 | -1754 | 17352 | AN3954 |
| 2030 | CONTIG64 | 176343 | 176827 | 1.36 | 2.62E-02 | transcription_start_site | + | 180998 | 180998 | -4413 | 17353 | AN3955 |
| 2030 | CONTIG64 | 176343 | 176827 | 1.36 | 2.62E-02 | transcription_start_site | + | 181248 | 181248 | -4663 | 17354 | AN3955 |
| 2030 | CONTIG64 | 176343 | 176827 | 1.36 | 2.62E-02 | transcription_start_site | + | 181806 | 181806 | -5221 | 17355 | AN3955 |
| 2208 | CONTIG64 | 179028 | 180142 | 1.29 | 2.18E-02 | transcription_start_site | + | 180998 | 180998 | -1413 | 17353 | AN3955 |
| 2208 | CONTIG64 | 179028 | 180142 | 1.29 | 2.18E-02 | transcription_start_site | + | 181248 | 181248 | -1663 | 17354 | AN3955 |
| 2208 | CONTIG64 | 179028 | 180142 | 1.29 | 2.18E-02 | transcription_start_site | + | 181806 | 181806 | -2221 | 17355 | AN3955 |
| 2899 | CONTIG64 | 177768 | 178327 | 1    | 1.25E-01 | transcription_start_site | + | 180998 | 180998 | -2950 | 17353 | AN3955 |
| 2899 | CONTIG64 | 177768 | 178327 | 1    | 1.25E-01 | transcription_start_site | + | 181248 | 181248 | -3200 | 17354 | AN3955 |
| 2899 | CONTIG64 | 177768 | 178327 | 1    | 1.25E-01 | transcription_start_site | + | 181806 | 181806 | -3758 | 17355 | AN3955 |
| 2342 | CONTIG64 | 183244 | 184418 | 1.25 | 2.45E-02 | transcription_start_site | - | 184008 | 184008 | 177   | 17357 | AN3956 |
| 2342 | CONTIG64 | 183244 | 184418 | 1.25 | 2.45E-02 | transcription_start_site | - | 184642 | 184642 | 811   | 17356 | AN3956 |
| 2342 | CONTIG64 | 183244 | 184418 | 1.25 | 2.45E-02 | transcription_start_site | - | 185210 | 185210 | 1379  | 17362 | AN3957 |
| 2342 | CONTIG64 | 183244 | 184418 | 1.25 | 2.45E-02 | transcription_start_site | + | 187671 | 187671 | -3840 | 17363 | AN3958 |
| 2342 | CONTIG64 | 183244 | 184418 | 1.25 | 2.45E-02 | transcription_start_site | + | 188001 | 188001 | -4170 | 17364 | AN3958 |
| 2069 | CONTIG65 | 1351   | 1645   | 1.34 | 3.08E-02 | transcription_start_site | + | 6303   | 6303   | -4805 | 17375 | AN3963 |
| 1971 | CONTIG65 | 14868  | 15142  | 1.38 | 2.62E-02 | transcription_start_site | + | 15268  | 15268  | -263  | 17391 | AN3967 |
| 1971 | CONTIG65 | 14868  | 15142  | 1.38 | 2.62E-02 | transcription_start_site | + | 14529  | 14529  | 476   | 17390 | AN3967 |
| 1971 | CONTIG65 | 14868  | 15142  | 1.38 | 2.62E-02 | transcription_start_site | + | 14303  | 14303  | 702   | 17389 | AN3967 |
| 1228 | CONTIG65 | 18228  | 18585  | 1.74 | 4.61E-03 | transcription_start_site | + | 18868  | 18868  | -461  | 17392 | AN3968 |

|      |          |        |        |      |          |                          |   |        |        |       |       |        |
|------|----------|--------|--------|------|----------|--------------------------|---|--------|--------|-------|-------|--------|
| 1971 | CONTIG65 | 14868  | 15142  | 1.38 | 2.62E-02 | transcription_start_site | + | 18868  | 18868  | -3863 | 17392 | AN3968 |
| 1228 | CONTIG65 | 18228  | 18585  | 1.74 | 4.61E-03 | transcription_start_site | + | 22792  | 22792  | -4385 | 17393 | AN3969 |
| 1228 | CONTIG65 | 18228  | 18585  | 1.74 | 4.61E-03 | transcription_start_site | + | 23075  | 23075  | -4668 | 17394 | AN3969 |
| 2978 | CONTIG65 | 20268  | 20762  | 0.94 | 1.66E-01 | transcription_start_site | + | 22792  | 22792  | -2277 | 17393 | AN3969 |
| 2978 | CONTIG65 | 20268  | 20762  | 0.94 | 1.66E-01 | transcription_start_site | + | 23075  | 23075  | -2560 | 17394 | AN3969 |
| 2978 | CONTIG65 | 20268  | 20762  | 0.94 | 1.66E-01 | transcription_start_site | + | 23617  | 23617  | -3102 | 17395 | AN3969 |
| 2820 | CONTIG65 | 29481  | 30289  | 1.05 | 5.82E-02 | transcription_start_site | - | 25624  | 25624  | -4261 | 17396 | AN3970 |
| 2936 | CONTIG65 | 49365  | 49634  | 0.98 | 1.44E-01 | transcription_start_site | - | 48285  | 48285  | -1214 | 17406 | AN3977 |
| 2936 | CONTIG65 | 49365  | 49634  | 0.98 | 1.44E-01 | transcription_start_site | - | 48068  | 48068  | -1431 | 17407 | AN3977 |
| 2936 | CONTIG65 | 49365  | 49634  | 0.98 | 1.44E-01 | transcription_start_site | - | 47664  | 47664  | -1835 | 17408 | AN3977 |
| 2521 | CONTIG65 | 53637  | 54056  | 1.19 | 5.88E-02 | transcription_start_site | + | 56230  | 56230  | -2383 | 17409 | AN3979 |
| 2885 | CONTIG65 | 78085  | 78354  | 1.01 | 1.25E-01 | transcription_start_site | - | 73886  | 73886  | -4333 | 17423 | AN3985 |
| 2885 | CONTIG65 | 78085  | 78354  | 1.01 | 1.25E-01 | transcription_start_site | - | 73528  | 73528  | -4691 | 17424 | AN3985 |
| 2885 | CONTIG65 | 78085  | 78354  | 1.01 | 1.25E-01 | transcription_start_site | - | 76499  | 76499  | -1720 | 17426 | AN3986 |
| 2885 | CONTIG65 | 78085  | 78354  | 1.01 | 1.25E-01 | transcription_start_site | - | 76400  | 76400  | -1819 | 17427 | AN3986 |
| 2885 | CONTIG65 | 78085  | 78354  | 1.01 | 1.25E-01 | transcription_start_site | - | 76273  | 76273  | -1946 | 17428 | AN3986 |
| 2885 | CONTIG65 | 78085  | 78354  | 1.01 | 1.25E-01 | transcription_start_site | - | 75891  | 75891  | -2328 | 17429 | AN3986 |
| 2885 | CONTIG65 | 78085  | 78354  | 1.01 | 1.25E-01 | transcription_start_site | - | 75304  | 75304  | -2915 | 17430 | AN3986 |
| 2885 | CONTIG65 | 78085  | 78354  | 1.01 | 1.25E-01 | transcription_start_site | - | 75213  | 75213  | -3006 | 17431 | AN3986 |
| 2979 | CONTIG65 | 101630 | 101919 | 0.94 | 1.66E-01 | transcription_start_site | - | 97184  | 97184  | -4590 | 17443 | AN3992 |
| 2703 | CONTIG65 | 106139 | 106403 | 1.12 | 8.01E-02 | transcription_start_site | - | 101164 | 101164 | -5107 | 17449 | AN3994 |
| 2979 | CONTIG65 | 101630 | 101919 | 0.94 | 1.66E-01 | transcription_start_site | - | 101164 | 101164 | -610  | 17449 | AN3994 |
| 2979 | CONTIG65 | 101630 | 101919 | 0.94 | 1.66E-01 | transcription_start_site | - | 101007 | 101007 | -767  | 17450 | AN3994 |
| 2979 | CONTIG65 | 101630 | 101919 | 0.94 | 1.66E-01 | transcription_start_site | - | 100726 | 100726 | -1048 | 17451 | AN3994 |
| 2979 | CONTIG65 | 101630 | 101919 | 0.94 | 1.66E-01 | transcription_start_site | + | 101600 | 101600 | 174   | 17452 | AN3995 |
| 2979 | CONTIG65 | 101630 | 101919 | 0.94 | 1.66E-01 | transcription_start_site | + | 102959 | 102959 | -1184 | 17453 | AN3995 |
| 2703 | CONTIG65 | 106139 | 106403 | 1.12 | 8.01E-02 | transcription_start_site | + | 106073 | 106073 | 198   | 17454 | AN3996 |
| 2979 | CONTIG65 | 101630 | 101919 | 0.94 | 1.66E-01 | transcription_start_site | + | 106073 | 106073 | -4298 | 17454 | AN3996 |
| 2278 | CONTIG65 | 112295 | 112555 | 1.27 | 4.36E-02 | transcription_start_site | - | 110208 | 110208 | -2217 | 17455 | AN3997 |
| 2278 | CONTIG65 | 112295 | 112555 | 1.27 | 4.36E-02 | transcription_start_site | - | 109954 | 109954 | -2471 | 17456 | AN3997 |
| 2754 | CONTIG65 | 111619 | 112045 | 1.09 | 9.24E-02 | transcription_start_site | - | 110208 | 110208 | -1624 | 17455 | AN3997 |
| 2754 | CONTIG65 | 111619 | 112045 | 1.09 | 9.24E-02 | transcription_start_site | - | 109954 | 109954 | -1878 | 17456 | AN3997 |
| 2278 | CONTIG65 | 112295 | 112555 | 1.27 | 4.36E-02 | transcription_start_site | - | 112131 | 112131 | -294  | 17457 | AN3998 |
| 2754 | CONTIG65 | 111619 | 112045 | 1.09 | 9.24E-02 | transcription_start_site | - | 112131 | 112131 | 299   | 17457 | AN3998 |
| 2278 | CONTIG65 | 112295 | 112555 | 1.27 | 4.36E-02 | transcription_start_site | + | 114940 | 114940 | -2515 | 17458 | AN3999 |
| 2754 | CONTIG65 | 111619 | 112045 | 1.09 | 9.24E-02 | transcription_start_site | + | 114940 | 114940 | -3108 | 17458 | AN3999 |
| 1392 | CONTIG65 | 121067 | 121491 | 1.63 | 7.85E-03 | transcription_start_site | + | 121692 | 121692 | -413  | 17461 | AN4000 |
| 2398 | CONTIG65 | 119552 | 119841 | 1.23 | 5.22E-02 | transcription_start_site | + | 119581 | 119581 | 115   | 17460 | AN4000 |
| 2398 | CONTIG65 | 119552 | 119841 | 1.23 | 5.22E-02 | transcription_start_site | + | 121692 | 121692 | -1995 | 17461 | AN4000 |
| 1972 | CONTIG65 | 123095 | 123519 | 1.38 | 2.62E-02 | transcription_start_site | - | 124266 | 124266 | 959   | 17462 | AN4001 |
| 1972 | CONTIG65 | 123095 | 123519 | 1.38 | 2.62E-02 | transcription_start_site | + | 127254 | 127254 | -3947 | 17470 | AN4003 |
| 1972 | CONTIG65 | 123095 | 123519 | 1.38 | 2.62E-02 | transcription_start_site | + | 127539 | 127539 | -4232 | 17471 | AN4003 |
| 1968 | CONTIG65 | 154583 | 155467 | 1.38 | 1.01E-02 | transcription_start_site | + | 154229 | 154229 | 796   | 17500 | AN4012 |
| 1968 | CONTIG65 | 154583 | 155467 | 1.38 | 1.01E-02 | transcription_start_site | + | 154129 | 154129 | 896   | 17499 | AN4012 |
| 1968 | CONTIG65 | 154583 | 155467 | 1.38 | 1.01E-02 | transcription_start_site | + | 155065 | 155065 | -40   | 17501 | AN4013 |
| 1968 | CONTIG65 | 154583 | 155467 | 1.38 | 1.01E-02 | transcription_start_site | + | 155189 | 155189 | -164  | 17502 | AN4013 |
| 1968 | CONTIG65 | 154583 | 155467 | 1.38 | 1.01E-02 | transcription_start_site | + | 155296 | 155296 | -271  | 17503 | AN4013 |
| 1968 | CONTIG65 | 154583 | 155467 | 1.38 | 1.01E-02 | transcription_start_site | + | 156453 | 156453 | -1428 | 17504 | AN4013 |
| 1968 | CONTIG65 | 154583 | 155467 | 1.38 | 1.01E-02 | transcription_start_site | + | 156616 | 156616 | -1591 | 17505 | AN4013 |
| 1968 | CONTIG65 | 154583 | 155467 | 1.38 | 1.01E-02 | transcription_start_site | + | 156711 | 156711 | -1686 | 17506 | AN4013 |
| 1968 | CONTIG65 | 154583 | 155467 | 1.38 | 1.01E-02 | transcription_start_site | + | 156887 | 156887 | -1862 | 17507 | AN4013 |
| 1739 | CONTIG65 | 178054 | 178943 | 1.48 | 7.16E-03 | transcription_start_site | - | 177977 | 177977 | -521  | 17537 | AN4021 |
| 1739 | CONTIG65 | 178054 | 178943 | 1.48 | 7.16E-03 | transcription_start_site | - | 177756 | 177756 | -742  | 17538 | AN4021 |
| 1739 | CONTIG65 | 178054 | 178943 | 1.48 | 7.16E-03 | transcription_start_site | - | 177321 | 177321 | -1177 | 17539 | AN4021 |
| 2937 | CONTIG65 | 182938 | 183509 | 0.98 | 1.44E-01 | transcription_start_site | - | 177977 | 177977 | -5246 | 17537 | AN4021 |
| 2823 | CONTIG65 | 185043 | 185677 | 1.05 | 9.26E-02 | transcription_start_site | - | 180827 | 180827 | -4533 | 17540 | AN4022 |
| 2937 | CONTIG65 | 182938 | 183509 | 0.98 | 1.44E-01 | transcription_start_site | - | 180827 | 180827 | -2396 | 17540 | AN4022 |

|      |          |        |        |      |          |                          |   |        |        |       |       |        |
|------|----------|--------|--------|------|----------|--------------------------|---|--------|--------|-------|-------|--------|
| 2600 | CONTIG65 | 187058 | 187637 | 1.16 | 6.84E-02 | transcription_start_site | - | 183111 | 183111 | -4236 | 17541 | AN4023 |
| 2600 | CONTIG65 | 187058 | 187637 | 1.16 | 6.84E-02 | transcription_start_site | - | 182494 | 182494 | -4853 | 17542 | AN4023 |
| 2823 | CONTIG65 | 185043 | 185677 | 1.05 | 9.26E-02 | transcription_start_site | - | 183111 | 183111 | -2249 | 17541 | AN4023 |
| 2823 | CONTIG65 | 185043 | 185677 | 1.05 | 9.26E-02 | transcription_start_site | - | 182494 | 182494 | -2866 | 17542 | AN4023 |
| 2937 | CONTIG65 | 182938 | 183509 | 0.98 | 1.44E-01 | transcription_start_site | - | 183111 | 183111 | -112  | 17541 | AN4023 |
| 2937 | CONTIG65 | 182938 | 183509 | 0.98 | 1.44E-01 | transcription_start_site | - | 182494 | 182494 | -729  | 17542 | AN4023 |
| 1739 | CONTIG65 | 178054 | 178943 | 1.48 | 7.16E-03 | transcription_start_site | + | 183710 | 183710 | -5211 | 17543 | AN4024 |
| 1739 | CONTIG65 | 178054 | 178943 | 1.48 | 7.16E-03 | transcription_start_site | + | 183912 | 183912 | -5413 | 17544 | AN4024 |
| 2823 | CONTIG65 | 185043 | 185677 | 1.05 | 9.26E-02 | transcription_start_site | + | 184822 | 184822 | 538   | 17546 | AN4024 |
| 2823 | CONTIG65 | 185043 | 185677 | 1.05 | 9.26E-02 | transcription_start_site | + | 184181 | 184181 | 1179  | 17545 | AN4024 |
| 2937 | CONTIG65 | 182938 | 183509 | 0.98 | 1.44E-01 | transcription_start_site | + | 183710 | 183710 | -486  | 17543 | AN4024 |
| 2937 | CONTIG65 | 182938 | 183509 | 0.98 | 1.44E-01 | transcription_start_site | + | 183912 | 183912 | -688  | 17544 | AN4024 |
| 2937 | CONTIG65 | 182938 | 183509 | 0.98 | 1.44E-01 | transcription_start_site | + | 184181 | 184181 | -957  | 17545 | AN4024 |
| 2937 | CONTIG65 | 182938 | 183509 | 0.98 | 1.44E-01 | transcription_start_site | + | 184822 | 184822 | -1598 | 17546 | AN4024 |
| 282  | CONTIG65 | 188183 | 188602 | 2.79 | 0.00E+00 | transcription_start_site | - | 187535 | 187535 | -857  | 17547 | AN4025 |
| 282  | CONTIG65 | 188183 | 188602 | 2.79 | 0.00E+00 | transcription_start_site | - | 187332 | 187332 | -1060 | 17548 | AN4025 |
| 282  | CONTIG65 | 188183 | 188602 | 2.79 | 0.00E+00 | transcription_start_site | - | 186327 | 186327 | -2065 | 17549 | AN4025 |
| 2600 | CONTIG65 | 187058 | 187637 | 1.16 | 6.84E-02 | transcription_start_site | - | 187332 | 187332 | -15   | 17548 | AN4025 |
| 2600 | CONTIG65 | 187058 | 187637 | 1.16 | 6.84E-02 | transcription_start_site | - | 187535 | 187535 | 187   | 17547 | AN4025 |
| 2600 | CONTIG65 | 187058 | 187637 | 1.16 | 6.84E-02 | transcription_start_site | - | 186327 | 186327 | -1020 | 17549 | AN4025 |
| 2823 | CONTIG65 | 185043 | 185677 | 1.05 | 9.26E-02 | transcription_start_site | - | 186327 | 186327 | 967   | 17549 | AN4025 |
| 282  | CONTIG65 | 188183 | 188602 | 2.79 | 0.00E+00 | transcription_start_site | + | 189460 | 189460 | -1067 | 17550 | AN4026 |
| 282  | CONTIG65 | 188183 | 188602 | 2.79 | 0.00E+00 | transcription_start_site | + | 189746 | 189746 | -1353 | 17551 | AN4026 |
| 282  | CONTIG65 | 188183 | 188602 | 2.79 | 0.00E+00 | transcription_start_site | + | 190924 | 190924 | -2531 | 17552 | AN4026 |
| 282  | CONTIG65 | 188183 | 188602 | 2.79 | 0.00E+00 | transcription_start_site | + | 191082 | 191082 | -2689 | 17553 | AN4026 |
| 282  | CONTIG65 | 188183 | 188602 | 2.79 | 0.00E+00 | transcription_start_site | + | 191455 | 191455 | -3062 | 17554 | AN4026 |
| 2600 | CONTIG65 | 187058 | 187637 | 1.16 | 6.84E-02 | transcription_start_site | + | 189460 | 189460 | -2112 | 17550 | AN4026 |
| 2600 | CONTIG65 | 187058 | 187637 | 1.16 | 6.84E-02 | transcription_start_site | + | 189746 | 189746 | -2398 | 17551 | AN4026 |
| 2600 | CONTIG65 | 187058 | 187637 | 1.16 | 6.84E-02 | transcription_start_site | + | 190924 | 190924 | -3576 | 17552 | AN4026 |
| 2600 | CONTIG65 | 187058 | 187637 | 1.16 | 6.84E-02 | transcription_start_site | + | 191082 | 191082 | -3734 | 17553 | AN4026 |
| 2600 | CONTIG65 | 187058 | 187637 | 1.16 | 6.84E-02 | transcription_start_site | + | 191455 | 191455 | -4107 | 17554 | AN4026 |
| 2823 | CONTIG65 | 185043 | 185677 | 1.05 | 9.26E-02 | transcription_start_site | + | 189460 | 189460 | -4100 | 17550 | AN4026 |
| 2823 | CONTIG65 | 185043 | 185677 | 1.05 | 9.26E-02 | transcription_start_site | + | 189746 | 189746 | -4386 | 17551 | AN4026 |
| 2522 | CONTIG65 | 201680 | 201965 | 1.19 | 5.88E-02 | transcription_start_site | - | 199470 | 199470 | -2352 | 17557 | AN4028 |
| 2522 | CONTIG65 | 201680 | 201965 | 1.19 | 5.88E-02 | transcription_start_site | - | 197288 | 197288 | -4534 | 17558 | AN4028 |
| 2522 | CONTIG65 | 201680 | 201965 | 1.19 | 5.88E-02 | transcription_start_site | - | 200721 | 200721 | -1101 | 17559 | AN4029 |
| 2522 | CONTIG65 | 201680 | 201965 | 1.19 | 5.88E-02 | transcription_start_site | - | 200616 | 200616 | -1206 | 17560 | AN4029 |
| 2522 | CONTIG65 | 201680 | 201965 | 1.19 | 5.88E-02 | transcription_start_site | - | 200373 | 200373 | -1449 | 17561 | AN4029 |
| 2176 | CONTIG65 | 213994 | 214403 | 1.3  | 2.18E-02 | transcription_start_site | - | 211703 | 211703 | -2495 | 17565 | AN4032 |
| 2176 | CONTIG65 | 213994 | 214403 | 1.3  | 2.18E-02 | transcription_start_site | - | 209248 | 209248 | -4950 | 17566 | AN4032 |
| 2176 | CONTIG65 | 213994 | 214403 | 1.3  | 2.18E-02 | transcription_start_site | + | 215129 | 215129 | -930  | 17571 | AN4034 |
| 2176 | CONTIG65 | 213994 | 214403 | 1.3  | 2.18E-02 | transcription_start_site | + | 215529 | 215529 | -1330 | 17572 | AN4034 |
| 2176 | CONTIG65 | 213994 | 214403 | 1.3  | 2.18E-02 | transcription_start_site | + | 215692 | 215692 | -1493 | 17573 | AN4034 |
| 2176 | CONTIG65 | 213994 | 214403 | 1.3  | 2.18E-02 | transcription_start_site | + | 215904 | 215904 | -1705 | 17574 | AN4034 |
| 1633 | CONTIG65 | 230935 | 231219 | 1.52 | 1.30E-02 | transcription_start_site | + | 230351 | 230351 | 726   | 17588 | AN4038 |
| 982  | CONTIG65 | 236570 | 236920 | 1.92 | 1.54E-03 | transcription_start_site | - | 231746 | 231746 | -4999 | 17589 | AN4039 |
| 1633 | CONTIG65 | 230935 | 231219 | 1.52 | 1.30E-02 | transcription_start_site | - | 231372 | 231372 | 295   | 17590 | AN4039 |
| 1633 | CONTIG65 | 230935 | 231219 | 1.52 | 1.30E-02 | transcription_start_site | - | 231746 | 231746 | 669   | 17589 | AN4039 |
| 982  | CONTIG65 | 236570 | 236920 | 1.92 | 1.54E-03 | transcription_start_site | - | 233716 | 233716 | -3029 | 17591 | AN4040 |
| 982  | CONTIG65 | 236570 | 236920 | 1.92 | 1.54E-03 | transcription_start_site | - | 232449 | 232449 | -4296 | 17592 | AN4040 |
| 982  | CONTIG65 | 236570 | 236920 | 1.92 | 1.54E-03 | transcription_start_site | - | 235292 | 235292 | -1453 | 17593 | AN4041 |
| 982  | CONTIG65 | 236570 | 236920 | 1.92 | 1.54E-03 | transcription_start_site | + | 237261 | 237261 | -516  | 17594 | AN4042 |
| 982  | CONTIG65 | 236570 | 236920 | 1.92 | 1.54E-03 | transcription_start_site | + | 237471 | 237471 | -726  | 17595 | AN4042 |
| 982  | CONTIG65 | 236570 | 236920 | 1.92 | 1.54E-03 | transcription_start_site | + | 237683 | 237683 | -938  | 17596 | AN4042 |
| 982  | CONTIG65 | 236570 | 236920 | 1.92 | 1.54E-03 | transcription_start_site | + | 238986 | 238986 | -2241 | 17597 | AN4042 |
| 1489 | CONTIG65 | 252617 | 254081 | 1.59 | 8.81E-03 | transcription_start_site | - | 252096 | 252096 | -1253 | 17601 | AN4045 |
| 2938 | CONTIG65 | 255607 | 255876 | 0.98 | 1.44E-01 | transcription_start_site | - | 252096 | 252096 | -3645 | 17601 | AN4045 |

|      |          |        |        |      |          |                          |   |        |        |       |       |        |
|------|----------|--------|--------|------|----------|--------------------------|---|--------|--------|-------|-------|--------|
| 1489 | CONTIG65 | 252617 | 254081 | 1.59 | 8.81E-03 | transcription_start_site | + | 253038 | 253038 | 311   | 17603 | AN4046 |
| 1489 | CONTIG65 | 252617 | 254081 | 1.59 | 8.81E-03 | transcription_start_site | + | 252944 | 252944 | 405   | 17602 | AN4046 |
| 2399 | CONTIG65 | 249682 | 249951 | 1.23 | 5.22E-02 | transcription_start_site | + | 252944 | 252944 | -3127 | 17602 | AN4046 |
| 2399 | CONTIG65 | 249682 | 249951 | 1.23 | 5.22E-02 | transcription_start_site | + | 253038 | 253038 | -3221 | 17603 | AN4046 |
| 1489 | CONTIG65 | 252617 | 254081 | 1.59 | 8.81E-03 | transcription_start_site | - | 255022 | 255022 | 1673  | 17605 | AN4047 |
| 1738 | CONTIG65 | 258392 | 259181 | 1.48 | 3.83E-03 | transcription_start_site | - | 256219 | 256219 | -2567 | 17604 | AN4047 |
| 1738 | CONTIG65 | 258392 | 259181 | 1.48 | 3.83E-03 | transcription_start_site | - | 255022 | 255022 | -3764 | 17605 | AN4047 |
| 2523 | CONTIG65 | 260637 | 261051 | 1.19 | 5.88E-02 | transcription_start_site | - | 256219 | 256219 | -4625 | 17604 | AN4047 |
| 2876 | CONTIG65 | 259652 | 260601 | 1.01 | 8.00E-02 | transcription_start_site | - | 256219 | 256219 | -3907 | 17604 | AN4047 |
| 2876 | CONTIG65 | 259652 | 260601 | 1.01 | 8.00E-02 | transcription_start_site | - | 255022 | 255022 | -5104 | 17605 | AN4047 |
| 2938 | CONTIG65 | 255607 | 255876 | 0.98 | 1.44E-01 | transcription_start_site | - | 256219 | 256219 | 477   | 17604 | AN4047 |
| 2938 | CONTIG65 | 255607 | 255876 | 0.98 | 1.44E-01 | transcription_start_site | - | 255022 | 255022 | -719  | 17605 | AN4047 |
| 1489 | CONTIG65 | 252617 | 254081 | 1.59 | 8.81E-03 | transcription_start_site | + | 256530 | 256530 | -3181 | 17606 | AN4048 |
| 2938 | CONTIG65 | 255607 | 255876 | 0.98 | 1.44E-01 | transcription_start_site | + | 256530 | 256530 | -788  | 17606 | AN4048 |
| 1738 | CONTIG65 | 258392 | 259181 | 1.48 | 3.83E-03 | transcription_start_site | - | 258825 | 258825 | 38    | 17607 | AN4049 |
| 2523 | CONTIG65 | 260637 | 261051 | 1.19 | 5.88E-02 | transcription_start_site | - | 258825 | 258825 | -2019 | 17607 | AN4049 |
| 2876 | CONTIG65 | 259652 | 260601 | 1.01 | 8.00E-02 | transcription_start_site | - | 258825 | 258825 | -1301 | 17607 | AN4049 |
| 3009 | CONTIG65 | 261692 | 261968 | 0.91 | 1.93E-01 | transcription_start_site | - | 258825 | 258825 | -3005 | 17607 | AN4049 |
| 3009 | CONTIG65 | 261692 | 261968 | 0.91 | 1.93E-01 | transcription_start_site | - | 262192 | 262192 | 362   | 17611 | AN4050 |
| 3009 | CONTIG65 | 261692 | 261968 | 0.91 | 1.93E-01 | transcription_start_site | - | 262693 | 262693 | 863   | 17610 | AN4050 |
| 2877 | CONTIG65 | 270907 | 271266 | 1.01 | 1.07E-01 | transcription_start_site | - | 271294 | 271294 | 207   | 17625 | AN4053 |
| 2877 | CONTIG65 | 270907 | 271266 | 1.01 | 1.07E-01 | transcription_start_site | - | 271535 | 271535 | 448   | 17624 | AN4053 |
| 2877 | CONTIG65 | 270907 | 271266 | 1.01 | 1.07E-01 | transcription_start_site | - | 272053 | 272053 | 966   | 17623 | AN4053 |
| 2877 | CONTIG65 | 270907 | 271266 | 1.01 | 1.07E-01 | transcription_start_site | + | 274503 | 274503 | -3416 | 17626 | AN4054 |
| 2877 | CONTIG65 | 270907 | 271266 | 1.01 | 1.07E-01 | transcription_start_site | + | 274633 | 274633 | -3546 | 17627 | AN4054 |
| 2877 | CONTIG65 | 270907 | 271266 | 1.01 | 1.07E-01 | transcription_start_site | + | 274769 | 274769 | -3682 | 17628 | AN4054 |
| 2877 | CONTIG65 | 270907 | 271266 | 1.01 | 1.07E-01 | transcription_start_site | + | 275252 | 275252 | -4165 | 17629 | AN4054 |
| 2872 | CONTIG66 | 11552  | 12372  | 1.02 | 1.28E-01 | transcription_start_site | - | 8405   | 8405   | -3557 | 17637 | AN4058 |
| 2872 | CONTIG66 | 11552  | 12372  | 1.02 | 1.28E-01 | transcription_start_site | - | 8189   | 8189   | -3773 | 17638 | AN4058 |
| 2872 | CONTIG66 | 11552  | 12372  | 1.02 | 1.28E-01 | transcription_start_site | - | 8010   | 8010   | -3952 | 17639 | AN4058 |
| 2872 | CONTIG66 | 11552  | 12372  | 1.02 | 1.28E-01 | transcription_start_site | - | 7860   | 7860   | -4102 | 17640 | AN4058 |
| 2872 | CONTIG66 | 11552  | 12372  | 1.02 | 1.28E-01 | transcription_start_site | - | 9674   | 9674   | -2288 | 17641 | AN4059 |
| 2872 | CONTIG66 | 11552  | 12372  | 1.02 | 1.28E-01 | transcription_start_site | - | 9202   | 9202   | -2760 | 17642 | AN4059 |
| 2872 | CONTIG66 | 11552  | 12372  | 1.02 | 1.28E-01 | transcription_start_site | - | 8978   | 8978   | -2984 | 17643 | AN4059 |
| 2872 | CONTIG66 | 11552  | 12372  | 1.02 | 1.28E-01 | transcription_start_site | + | 11434  | 11434  | 528   | 17646 | AN4060 |
| 2872 | CONTIG66 | 11552  | 12372  | 1.02 | 1.28E-01 | transcription_start_site | + | 11318  | 11318  | 644   | 17645 | AN4060 |
| 2872 | CONTIG66 | 11552  | 12372  | 1.02 | 1.28E-01 | transcription_start_site | + | 10926  | 10926  | 1036  | 17644 | AN4060 |
| 1913 | CONTIG66 | 15617  | 15951  | 1.4  | 3.08E-02 | transcription_start_site | - | 12795  | 12795  | -2989 | 17647 | AN4061 |
| 1913 | CONTIG66 | 15617  | 15951  | 1.4  | 3.08E-02 | transcription_start_site | - | 12563  | 12563  | -3221 | 17648 | AN4061 |
| 1913 | CONTIG66 | 15617  | 15951  | 1.4  | 3.08E-02 | transcription_start_site | - | 12153  | 12153  | -3631 | 17649 | AN4061 |
| 2872 | CONTIG66 | 11552  | 12372  | 1.02 | 1.28E-01 | transcription_start_site | - | 12153  | 12153  | 191   | 17649 | AN4061 |
| 2872 | CONTIG66 | 11552  | 12372  | 1.02 | 1.28E-01 | transcription_start_site | - | 12563  | 12563  | 601   | 17648 | AN4061 |
| 2872 | CONTIG66 | 11552  | 12372  | 1.02 | 1.28E-01 | transcription_start_site | - | 12795  | 12795  | 833   | 17647 | AN4061 |
| 2944 | CONTIG66 | 16577  | 16866  | 0.98 | 1.66E-01 | transcription_start_site | - | 12795  | 12795  | -3926 | 17647 | AN4061 |
| 2944 | CONTIG66 | 16577  | 16866  | 0.98 | 1.66E-01 | transcription_start_site | - | 12563  | 12563  | -4158 | 17648 | AN4061 |
| 2944 | CONTIG66 | 16577  | 16866  | 0.98 | 1.66E-01 | transcription_start_site | - | 12153  | 12153  | -4568 | 17649 | AN4061 |
| 1913 | CONTIG66 | 15617  | 15951  | 1.4  | 3.08E-02 | transcription_start_site | + | 15812  | 15812  | -28   | 17650 | AN4062 |
| 2872 | CONTIG66 | 11552  | 12372  | 1.02 | 1.28E-01 | transcription_start_site | + | 15812  | 15812  | -3850 | 17650 | AN4062 |
| 2944 | CONTIG66 | 16577  | 16866  | 0.98 | 1.66E-01 | transcription_start_site | + | 15812  | 15812  | 909   | 17650 | AN4062 |
| 628  | CONTIG66 | 20489  | 20828  | 2.27 | 2.16E-04 | transcription_start_site | - | 18652  | 18652  | -2006 | 17651 | AN4063 |
| 628  | CONTIG66 | 20489  | 20828  | 2.27 | 2.16E-04 | transcription_start_site | - | 20324  | 20324  | -334  | 17652 | AN4064 |
| 628  | CONTIG66 | 20489  | 20828  | 2.27 | 2.16E-04 | transcription_start_site | - | 20079  | 20079  | -579  | 17653 | AN4064 |
| 628  | CONTIG66 | 20489  | 20828  | 2.27 | 2.16E-04 | transcription_start_site | - | 19936  | 19936  | -722  | 17654 | AN4064 |
| 628  | CONTIG66 | 20489  | 20828  | 2.27 | 2.16E-04 | transcription_start_site | - | 19564  | 19564  | -1094 | 17655 | AN4064 |
| 628  | CONTIG66 | 20489  | 20828  | 2.27 | 2.16E-04 | transcription_start_site | + | 23855  | 23855  | -3196 | 17658 | AN4066 |
| 628  | CONTIG66 | 20489  | 20828  | 2.27 | 2.16E-04 | transcription_start_site | + | 24001  | 24001  | -3342 | 17659 | AN4066 |
| 628  | CONTIG66 | 20489  | 20828  | 2.27 | 2.16E-04 | transcription_start_site | + | 24414  | 24414  | -3755 | 17660 | AN4066 |



|      |          |       |       |      |          |                          |   |       |       |       |       |        |
|------|----------|-------|-------|------|----------|--------------------------|---|-------|-------|-------|-------|--------|
| 2470 | CONTIG66 | 32339 | 32753 | 1.21 | 6.84E-02 | transcription_start_site | - | 28981 | 28981 | -3565 | 17664 | AN4067 |
| 191  | CONTIG66 | 34739 | 35078 | 2.95 | 0.00E+00 | transcription_start_site | - | 31547 | 31547 | -3361 | 17667 | AN4069 |
| 191  | CONTIG66 | 34739 | 35078 | 2.95 | 0.00E+00 | transcription_start_site | - | 31139 | 31139 | -3769 | 17668 | AN4069 |
| 191  | CONTIG66 | 34739 | 35078 | 2.95 | 0.00E+00 | transcription_start_site | - | 30948 | 30948 | -3960 | 17669 | AN4069 |
| 2470 | CONTIG66 | 32339 | 32753 | 1.21 | 6.84E-02 | transcription_start_site | - | 31547 | 31547 | -999  | 17667 | AN4069 |
| 2470 | CONTIG66 | 32339 | 32753 | 1.21 | 6.84E-02 | transcription_start_site | - | 31139 | 31139 | -1407 | 17668 | AN4069 |
| 2470 | CONTIG66 | 32339 | 32753 | 1.21 | 6.84E-02 | transcription_start_site | - | 30948 | 30948 | -1598 | 17669 | AN4069 |
| 2470 | CONTIG66 | 32339 | 32753 | 1.21 | 6.84E-02 | transcription_start_site | + | 32511 | 32511 | 35    | 17671 | AN4070 |
| 2470 | CONTIG66 | 32339 | 32753 | 1.21 | 6.84E-02 | transcription_start_site | + | 32185 | 32185 | 361   | 17670 | AN4070 |
| 191  | CONTIG66 | 34739 | 35078 | 2.95 | 0.00E+00 | transcription_start_site | - | 34421 | 34421 | -487  | 17672 | AN4071 |
| 191  | CONTIG66 | 34739 | 35078 | 2.95 | 0.00E+00 | transcription_start_site | - | 34333 | 34333 | -575  | 17673 | AN4071 |
| 191  | CONTIG66 | 34739 | 35078 | 2.95 | 0.00E+00 | transcription_start_site | - | 34168 | 34168 | -740  | 17674 | AN4071 |
| 191  | CONTIG66 | 34739 | 35078 | 2.95 | 0.00E+00 | transcription_start_site | - | 33615 | 33615 | -1293 | 17675 | AN4071 |
| 2470 | CONTIG66 | 32339 | 32753 | 1.21 | 6.84E-02 | transcription_start_site | - | 33615 | 33615 | 1069  | 17675 | AN4071 |
| 191  | CONTIG66 | 34739 | 35078 | 2.95 | 0.00E+00 | transcription_start_site | + | 36068 | 36068 | -1159 | 17676 | AN4072 |
| 191  | CONTIG66 | 34739 | 35078 | 2.95 | 0.00E+00 | transcription_start_site | + | 39610 | 39610 | -4701 | 17677 | AN4072 |
| 2470 | CONTIG66 | 32339 | 32753 | 1.21 | 6.84E-02 | transcription_start_site | + | 36068 | 36068 | -3522 | 17676 | AN4072 |
| 2945 | CONTIG66 | 42318 | 42577 | 0.98 | 1.66E-01 | transcription_start_site | - | 43040 | 43040 | 592   | 17681 | AN4074 |
| 2945 | CONTIG66 | 42318 | 42577 | 0.98 | 1.66E-01 | transcription_start_site | - | 43196 | 43196 | 748   | 17680 | AN4074 |
| 2945 | CONTIG66 | 42318 | 42577 | 0.98 | 1.66E-01 | transcription_start_site | - | 41480 | 41480 | -967  | 17682 | AN4074 |
| 2945 | CONTIG66 | 42318 | 42577 | 0.98 | 1.66E-01 | transcription_start_site | + | 46127 | 46127 | -3679 | 17684 | AN4076 |
| 2945 | CONTIG66 | 42318 | 42577 | 0.98 | 1.66E-01 | transcription_start_site | + | 46796 | 46796 | -4348 | 17685 | AN4076 |
| 2806 | CONTIG66 | 65490 | 65909 | 1.06 | 1.07E-01 | transcription_start_site | - | 62982 | 62982 | -2717 | 17699 | AN4080 |
| 2806 | CONTIG66 | 65490 | 65909 | 1.06 | 1.07E-01 | transcription_start_site | - | 62903 | 62903 | -2796 | 17700 | AN4080 |
| 2806 | CONTIG66 | 65490 | 65909 | 1.06 | 1.07E-01 | transcription_start_site | - | 62828 | 62828 | -2871 | 17701 | AN4080 |
| 2806 | CONTIG66 | 65490 | 65909 | 1.06 | 1.07E-01 | transcription_start_site | - | 62730 | 62730 | -2969 | 17702 | AN4080 |
| 2806 | CONTIG66 | 65490 | 65909 | 1.06 | 1.07E-01 | transcription_start_site | - | 62599 | 62599 | -3100 | 17703 | AN4080 |
| 2806 | CONTIG66 | 65490 | 65909 | 1.06 | 1.07E-01 | transcription_start_site | - | 62506 | 62506 | -3193 | 17704 | AN4080 |
| 2806 | CONTIG66 | 65490 | 65909 | 1.06 | 1.07E-01 | transcription_start_site | - | 62379 | 62379 | -3320 | 17705 | AN4080 |
| 2806 | CONTIG66 | 65490 | 65909 | 1.06 | 1.07E-01 | transcription_start_site | - | 61972 | 61972 | -3727 | 17706 | AN4080 |
| 2806 | CONTIG66 | 65490 | 65909 | 1.06 | 1.07E-01 | transcription_start_site | - | 61562 | 61562 | -4137 | 17707 | AN4080 |
| 2806 | CONTIG66 | 65490 | 65909 | 1.06 | 1.07E-01 | transcription_start_site | - | 66010 | 66010 | 310   | 17717 | AN4082 |
| 2806 | CONTIG66 | 65490 | 65909 | 1.06 | 1.07E-01 | transcription_start_site | - | 65237 | 65237 | -462  | 17718 | AN4082 |
| 2806 | CONTIG66 | 65490 | 65909 | 1.06 | 1.07E-01 | transcription_start_site | - | 66688 | 66688 | 988   | 17716 | AN4082 |
| 2806 | CONTIG66 | 65490 | 65909 | 1.06 | 1.07E-01 | transcription_start_site | - | 66842 | 66842 | 1142  | 17715 | AN4082 |
| 2673 | CONTIG66 | 76886 | 77225 | 1.13 | 9.24E-02 | transcription_start_site | - | 72557 | 72557 | -4498 | 17723 | AN4084 |
| 2673 | CONTIG66 | 76886 | 77225 | 1.13 | 9.24E-02 | transcription_start_site | - | 76560 | 76560 | -495  | 17724 | AN4085 |
| 2673 | CONTIG66 | 76886 | 77225 | 1.13 | 9.24E-02 | transcription_start_site | - | 76423 | 76423 | -632  | 17725 | AN4085 |
| 2673 | CONTIG66 | 76886 | 77225 | 1.13 | 9.24E-02 | transcription_start_site | - | 76248 | 76248 | -807  | 17726 | AN4085 |
| 2673 | CONTIG66 | 76886 | 77225 | 1.13 | 9.24E-02 | transcription_start_site | - | 76042 | 76042 | -1013 | 17727 | AN4085 |
| 2673 | CONTIG66 | 76886 | 77225 | 1.13 | 9.24E-02 | transcription_start_site | - | 75494 | 75494 | -1561 | 17728 | AN4085 |
| 2673 | CONTIG66 | 76886 | 77225 | 1.13 | 9.24E-02 | transcription_start_site | - | 75321 | 75321 | -1734 | 17729 | AN4085 |
| 2673 | CONTIG66 | 76886 | 77225 | 1.13 | 9.24E-02 | transcription_start_site | - | 75113 | 75113 | -1942 | 17730 | AN4085 |
| 2673 | CONTIG66 | 76886 | 77225 | 1.13 | 9.24E-02 | transcription_start_site | - | 74961 | 74961 | -2094 | 17731 | AN4085 |
| 2673 | CONTIG66 | 76886 | 77225 | 1.13 | 9.24E-02 | transcription_start_site | - | 74570 | 74570 | -2485 | 17732 | AN4085 |
| 2673 | CONTIG66 | 76886 | 77225 | 1.13 | 9.24E-02 | transcription_start_site | + | 77374 | 77374 | -318  | 17733 | AN4086 |
| 2673 | CONTIG66 | 76886 | 77225 | 1.13 | 9.24E-02 | transcription_start_site | + | 77484 | 77484 | -428  | 17734 | AN4086 |
| 2673 | CONTIG66 | 76886 | 77225 | 1.13 | 9.24E-02 | transcription_start_site | + | 77589 | 77589 | -533  | 17735 | AN4086 |
| 2673 | CONTIG66 | 76886 | 77225 | 1.13 | 9.24E-02 | transcription_start_site | + | 77663 | 77663 | -607  | 17736 | AN4086 |
| 2673 | CONTIG66 | 76886 | 77225 | 1.13 | 9.24E-02 | transcription_start_site | + | 77794 | 77794 | -738  | 17737 | AN4086 |
| 2673 | CONTIG66 | 76886 | 77225 | 1.13 | 9.24E-02 | transcription_start_site | + | 77987 | 77987 | -931  | 17738 | AN4086 |
| 2673 | CONTIG66 | 76886 | 77225 | 1.13 | 9.24E-02 | transcription_start_site | + | 78303 | 78303 | -1247 | 17739 | AN4086 |
| 2673 | CONTIG66 | 76886 | 77225 | 1.13 | 9.24E-02 | transcription_start_site | + | 78609 | 78609 | -1553 | 17740 | AN4086 |
| 2673 | CONTIG66 | 76886 | 77225 | 1.13 | 9.24E-02 | transcription_start_site | + | 79478 | 79478 | -2422 | 17741 | AN4086 |
| 615  | CONTIG67 | 8944  | 9203  | 2.29 | 1.80E-03 | transcription_start_site | + | 10748 | 10748 | -1674 | 17745 | AN4088 |
| 2411 | CONTIG67 | 7671  | 7945  | 1.23 | 1.25E-01 | transcription_start_site | + | 10748 | 10748 | -2940 | 17745 | AN4088 |
| 615  | CONTIG67 | 8944  | 9203  | 2.29 | 1.80E-03 | transcription_start_site | + | 13102 | 13102 | -4028 | 17746 | AN4089 |

|      |          |       |       |      |          |                          |   |       |       |       |       |        |
|------|----------|-------|-------|------|----------|--------------------------|---|-------|-------|-------|-------|--------|
| 1693 | CONTIG67 | 26788 | 27592 | 1.5  | 5.22E-02 | transcription_start_site | + | 29236 | 29236 | -2046 | 17765 | AN4095 |
| 1693 | CONTIG67 | 26788 | 27592 | 1.5  | 5.22E-02 | transcription_start_site | + | 29645 | 29645 | -2455 | 17766 | AN4095 |
| 1693 | CONTIG67 | 26788 | 27592 | 1.5  | 5.22E-02 | transcription_start_site | + | 29968 | 29968 | -2778 | 17767 | AN4095 |
| 1693 | CONTIG67 | 26788 | 27592 | 1.5  | 5.22E-02 | transcription_start_site | + | 30471 | 30471 | -3281 | 17768 | AN4095 |
| 1122 | CONTIG67 | 34442 | 34713 | 1.81 | 1.57E-02 | transcription_start_site | - | 34497 | 34497 | -80   | 17769 | AN4096 |
| 1122 | CONTIG67 | 34442 | 34713 | 1.81 | 1.57E-02 | transcription_start_site | - | 31381 | 31381 | -3196 | 17770 | AN4096 |
| 1122 | CONTIG67 | 34442 | 34713 | 1.81 | 1.57E-02 | transcription_start_site | + | 36893 | 36893 | -2315 | 17772 | AN4098 |
| 1122 | CONTIG67 | 34442 | 34713 | 1.81 | 1.57E-02 | transcription_start_site | + | 37115 | 37115 | -2537 | 17773 | AN4098 |
| 1193 | CONTIG67 | 45009 | 45668 | 1.76 | 9.21E-03 | transcription_start_site | - | 41655 | 41655 | -3683 | 17774 | AN4099 |
| 1193 | CONTIG67 | 45009 | 45668 | 1.76 | 9.21E-03 | transcription_start_site | - | 41058 | 41058 | -4280 | 17775 | AN4099 |
| 1193 | CONTIG67 | 45009 | 45668 | 1.76 | 9.21E-03 | transcription_start_site | - | 40916 | 40916 | -4422 | 17776 | AN4099 |
| 1193 | CONTIG67 | 45009 | 45668 | 1.76 | 9.21E-03 | transcription_start_site | - | 40727 | 40727 | -4611 | 17777 | AN4099 |
| 1193 | CONTIG67 | 45009 | 45668 | 1.76 | 9.21E-03 | transcription_start_site | - | 40399 | 40399 | -4939 | 17778 | AN4099 |
| 1193 | CONTIG67 | 45009 | 45668 | 1.76 | 9.21E-03 | transcription_start_site | - | 40250 | 40250 | -5088 | 17779 | AN4099 |
| 2138 | CONTIG67 | 44339 | 44994 | 1.32 | 9.24E-02 | transcription_start_site | - | 41655 | 41655 | -3011 | 17774 | AN4099 |
| 2138 | CONTIG67 | 44339 | 44994 | 1.32 | 9.24E-02 | transcription_start_site | - | 41058 | 41058 | -3608 | 17775 | AN4099 |
| 2138 | CONTIG67 | 44339 | 44994 | 1.32 | 9.24E-02 | transcription_start_site | - | 40916 | 40916 | -3750 | 17776 | AN4099 |
| 2138 | CONTIG67 | 44339 | 44994 | 1.32 | 9.24E-02 | transcription_start_site | - | 40727 | 40727 | -3939 | 17777 | AN4099 |
| 2138 | CONTIG67 | 44339 | 44994 | 1.32 | 9.24E-02 | transcription_start_site | - | 40399 | 40399 | -4267 | 17778 | AN4099 |
| 2138 | CONTIG67 | 44339 | 44994 | 1.32 | 9.24E-02 | transcription_start_site | - | 40250 | 40250 | -4416 | 17779 | AN4099 |
| 2412 | CONTIG67 | 41189 | 41678 | 1.23 | 1.25E-01 | transcription_start_site | - | 41655 | 41655 | 221   | 17774 | AN4099 |
| 2412 | CONTIG67 | 41189 | 41678 | 1.23 | 1.25E-01 | transcription_start_site | - | 41058 | 41058 | -375  | 17775 | AN4099 |
| 2412 | CONTIG67 | 41189 | 41678 | 1.23 | 1.25E-01 | transcription_start_site | - | 40916 | 40916 | -517  | 17776 | AN4099 |
| 2412 | CONTIG67 | 41189 | 41678 | 1.23 | 1.25E-01 | transcription_start_site | - | 40727 | 40727 | -706  | 17777 | AN4099 |
| 2412 | CONTIG67 | 41189 | 41678 | 1.23 | 1.25E-01 | transcription_start_site | - | 40399 | 40399 | -1034 | 17778 | AN4099 |
| 2412 | CONTIG67 | 41189 | 41678 | 1.23 | 1.25E-01 | transcription_start_site | - | 40250 | 40250 | -1183 | 17779 | AN4099 |
| 2412 | CONTIG67 | 41189 | 41678 | 1.23 | 1.25E-01 | transcription_start_site | - | 38803 | 38803 | -2630 | 17780 | AN4099 |
| 2412 | CONTIG67 | 41189 | 41678 | 1.23 | 1.25E-01 | transcription_start_site | + | 42164 | 42164 | -730  | 17781 | AN4100 |
| 2412 | CONTIG67 | 41189 | 41678 | 1.23 | 1.25E-01 | transcription_start_site | + | 42238 | 42238 | -804  | 17782 | AN4100 |
| 2412 | CONTIG67 | 41189 | 41678 | 1.23 | 1.25E-01 | transcription_start_site | + | 42754 | 42754 | -1320 | 17783 | AN4100 |
| 1193 | CONTIG67 | 45009 | 45668 | 1.76 | 9.21E-03 | transcription_start_site | - | 44257 | 44257 | -1081 | 17784 | AN4101 |
| 1193 | CONTIG67 | 45009 | 45668 | 1.76 | 9.21E-03 | transcription_start_site | - | 43949 | 43949 | -1389 | 17785 | AN4101 |
| 1193 | CONTIG67 | 45009 | 45668 | 1.76 | 9.21E-03 | transcription_start_site | - | 43753 | 43753 | -1585 | 17786 | AN4101 |
| 1193 | CONTIG67 | 45009 | 45668 | 1.76 | 9.21E-03 | transcription_start_site | - | 43543 | 43543 | -1795 | 17787 | AN4101 |
| 2138 | CONTIG67 | 44339 | 44994 | 1.32 | 9.24E-02 | transcription_start_site | - | 44257 | 44257 | -409  | 17784 | AN4101 |
| 2138 | CONTIG67 | 44339 | 44994 | 1.32 | 9.24E-02 | transcription_start_site | - | 43949 | 43949 | -717  | 17785 | AN4101 |
| 2138 | CONTIG67 | 44339 | 44994 | 1.32 | 9.24E-02 | transcription_start_site | - | 43753 | 43753 | -913  | 17786 | AN4101 |
| 2138 | CONTIG67 | 44339 | 44994 | 1.32 | 9.24E-02 | transcription_start_site | - | 43543 | 43543 | -1123 | 17787 | AN4101 |
| 1193 | CONTIG67 | 45009 | 45668 | 1.76 | 9.21E-03 | transcription_start_site | + | 46064 | 46064 | -725  | 17788 | AN4102 |
| 1193 | CONTIG67 | 45009 | 45668 | 1.76 | 9.21E-03 | transcription_start_site | + | 46173 | 46173 | -834  | 17789 | AN4102 |
| 1193 | CONTIG67 | 45009 | 45668 | 1.76 | 9.21E-03 | transcription_start_site | + | 46366 | 46366 | -1027 | 17790 | AN4102 |
| 1193 | CONTIG67 | 45009 | 45668 | 1.76 | 9.21E-03 | transcription_start_site | + | 46457 | 46457 | -1118 | 17791 | AN4102 |
| 1193 | CONTIG67 | 45009 | 45668 | 1.76 | 9.21E-03 | transcription_start_site | + | 46562 | 46562 | -1223 | 17792 | AN4102 |
| 1193 | CONTIG67 | 45009 | 45668 | 1.76 | 9.21E-03 | transcription_start_site | + | 47800 | 47800 | -2461 | 17793 | AN4102 |
| 1193 | CONTIG67 | 45009 | 45668 | 1.76 | 9.21E-03 | transcription_start_site | + | 48717 | 48717 | -3378 | 17794 | AN4102 |
| 2138 | CONTIG67 | 44339 | 44994 | 1.32 | 9.24E-02 | transcription_start_site | + | 46064 | 46064 | -1397 | 17788 | AN4102 |
| 2138 | CONTIG67 | 44339 | 44994 | 1.32 | 9.24E-02 | transcription_start_site | + | 46173 | 46173 | -1506 | 17789 | AN4102 |
| 2138 | CONTIG67 | 44339 | 44994 | 1.32 | 9.24E-02 | transcription_start_site | + | 46366 | 46366 | -1699 | 17790 | AN4102 |
| 2138 | CONTIG67 | 44339 | 44994 | 1.32 | 9.24E-02 | transcription_start_site | + | 46457 | 46457 | -1790 | 17791 | AN4102 |
| 2138 | CONTIG67 | 44339 | 44994 | 1.32 | 9.24E-02 | transcription_start_site | + | 46562 | 46562 | -1895 | 17792 | AN4102 |
| 2138 | CONTIG67 | 44339 | 44994 | 1.32 | 9.24E-02 | transcription_start_site | + | 47800 | 47800 | -3133 | 17793 | AN4102 |
| 2138 | CONTIG67 | 44339 | 44994 | 1.32 | 9.24E-02 | transcription_start_site | + | 48717 | 48717 | -4050 | 17794 | AN4102 |
| 2412 | CONTIG67 | 41189 | 41678 | 1.23 | 1.25E-01 | transcription_start_site | + | 46064 | 46064 | -4630 | 17788 | AN4102 |
| 2412 | CONTIG67 | 41189 | 41678 | 1.23 | 1.25E-01 | transcription_start_site | + | 46173 | 46173 | -4739 | 17789 | AN4102 |
| 2412 | CONTIG67 | 41189 | 41678 | 1.23 | 1.25E-01 | transcription_start_site | + | 46366 | 46366 | -4932 | 17790 | AN4102 |
| 2412 | CONTIG67 | 41189 | 41678 | 1.23 | 1.25E-01 | transcription_start_site | + | 46457 | 46457 | -5023 | 17791 | AN4102 |
| 2412 | CONTIG67 | 41189 | 41678 | 1.23 | 1.25E-01 | transcription_start_site | + | 46562 | 46562 | -5128 | 17792 | AN4102 |

|      |          |        |        |      |          |                          |   |        |        |       |       |        |
|------|----------|--------|--------|------|----------|--------------------------|---|--------|--------|-------|-------|--------|
| 1193 | CONTIG67 | 45009  | 45668  | 1.76 | 9.21E-03 | transcription_start_site | + | 49564  | 49564  | -4225 | 17795 | AN4103 |
| 1193 | CONTIG67 | 45009  | 45668  | 1.76 | 9.21E-03 | transcription_start_site | + | 49730  | 49730  | -4391 | 17796 | AN4103 |
| 1193 | CONTIG67 | 45009  | 45668  | 1.76 | 9.21E-03 | transcription_start_site | + | 50041  | 50041  | -4702 | 17797 | AN4103 |
| 1193 | CONTIG67 | 45009  | 45668  | 1.76 | 9.21E-03 | transcription_start_site | + | 50268  | 50268  | -4929 | 17798 | AN4103 |
| 1193 | CONTIG67 | 45009  | 45668  | 1.76 | 9.21E-03 | transcription_start_site | + | 50417  | 50417  | -5078 | 17799 | AN4103 |
| 1694 | CONTIG67 | 51090  | 51970  | 1.5  | 5.22E-02 | transcription_start_site | + | 50417  | 50417  | 1113  | 17799 | AN4103 |
| 1694 | CONTIG67 | 51090  | 51970  | 1.5  | 5.22E-02 | transcription_start_site | + | 50268  | 50268  | 1262  | 17798 | AN4103 |
| 2138 | CONTIG67 | 44339  | 44994  | 1.32 | 9.24E-02 | transcription_start_site | + | 49564  | 49564  | -4897 | 17795 | AN4103 |
| 2138 | CONTIG67 | 44339  | 44994  | 1.32 | 9.24E-02 | transcription_start_site | + | 49730  | 49730  | -5063 | 17796 | AN4103 |
| 1255 | CONTIG67 | 54306  | 55250  | 1.72 | 2.12E-02 | transcription_start_site | - | 54182  | 54182  | -596  | 17800 | AN4104 |
| 1255 | CONTIG67 | 54306  | 55250  | 1.72 | 2.12E-02 | transcription_start_site | - | 53151  | 53151  | -1627 | 17801 | AN4104 |
| 2139 | CONTIG67 | 55276  | 55630  | 1.32 | 9.24E-02 | transcription_start_site | - | 54182  | 54182  | -1271 | 17800 | AN4104 |
| 2139 | CONTIG67 | 55276  | 55630  | 1.32 | 9.24E-02 | transcription_start_site | - | 53151  | 53151  | -2302 | 17801 | AN4104 |
| 1255 | CONTIG67 | 54306  | 55250  | 1.72 | 2.12E-02 | transcription_start_site | + | 54488  | 54488  | 290   | 17802 | AN4105 |
| 1694 | CONTIG67 | 51090  | 51970  | 1.5  | 5.22E-02 | transcription_start_site | + | 54488  | 54488  | -2958 | 17802 | AN4105 |
| 2139 | CONTIG67 | 55276  | 55630  | 1.32 | 9.24E-02 | transcription_start_site | + | 54488  | 54488  | 965   | 17802 | AN4105 |
| 1255 | CONTIG67 | 54306  | 55250  | 1.72 | 2.12E-02 | transcription_start_site | - | 55981  | 55981  | 1203  | 17810 | AN4106 |
| 1255 | CONTIG67 | 54306  | 55250  | 1.72 | 2.12E-02 | transcription_start_site | - | 56241  | 56241  | 1463  | 17809 | AN4106 |
| 2139 | CONTIG67 | 55276  | 55630  | 1.32 | 9.24E-02 | transcription_start_site | - | 55981  | 55981  | 528   | 17810 | AN4106 |
| 2139 | CONTIG67 | 55276  | 55630  | 1.32 | 9.24E-02 | transcription_start_site | - | 56241  | 56241  | 788   | 17809 | AN4106 |
| 2139 | CONTIG67 | 55276  | 55630  | 1.32 | 9.24E-02 | transcription_start_site | - | 56608  | 56608  | 1155  | 17808 | AN4106 |
| 1199 | CONTIG67 | 71192  | 71466  | 1.76 | 1.84E-02 | transcription_start_site | - | 67852  | 67852  | -3477 | 17837 | AN4110 |
| 1199 | CONTIG67 | 71192  | 71466  | 1.76 | 1.84E-02 | transcription_start_site | - | 67674  | 67674  | -3655 | 17838 | AN4110 |
| 1199 | CONTIG67 | 71192  | 71466  | 1.76 | 1.84E-02 | transcription_start_site | - | 67513  | 67513  | -3816 | 17839 | AN4110 |
| 1199 | CONTIG67 | 71192  | 71466  | 1.76 | 1.84E-02 | transcription_start_site | - | 67198  | 67198  | -4131 | 17840 | AN4110 |
| 1199 | CONTIG67 | 71192  | 71466  | 1.76 | 1.84E-02 | transcription_start_site | - | 67006  | 67006  | -4323 | 17841 | AN4110 |
| 1597 | CONTIG67 | 72387  | 72726  | 1.54 | 4.36E-02 | transcription_start_site | - | 67852  | 67852  | -4704 | 17837 | AN4110 |
| 1597 | CONTIG67 | 72387  | 72726  | 1.54 | 4.36E-02 | transcription_start_site | - | 67674  | 67674  | -4882 | 17838 | AN4110 |
| 1597 | CONTIG67 | 72387  | 72726  | 1.54 | 4.36E-02 | transcription_start_site | - | 67513  | 67513  | -5043 | 17839 | AN4110 |
| 1199 | CONTIG67 | 71192  | 71466  | 1.76 | 1.84E-02 | transcription_start_site | + | 70492  | 70492  | 837   | 17846 | AN4112 |
| 1199 | CONTIG67 | 71192  | 71466  | 1.76 | 1.84E-02 | transcription_start_site | + | 70372  | 70372  | 957   | 17845 | AN4112 |
| 1199 | CONTIG67 | 71192  | 71466  | 1.76 | 1.84E-02 | transcription_start_site | + | 72819  | 72819  | -1490 | 17847 | AN4113 |
| 1199 | CONTIG67 | 71192  | 71466  | 1.76 | 1.84E-02 | transcription_start_site | + | 72943  | 72943  | -1614 | 17848 | AN4113 |
| 1597 | CONTIG67 | 72387  | 72726  | 1.54 | 4.36E-02 | transcription_start_site | + | 72819  | 72819  | -262  | 17847 | AN4113 |
| 1597 | CONTIG67 | 72387  | 72726  | 1.54 | 4.36E-02 | transcription_start_site | + | 72943  | 72943  | -386  | 17848 | AN4113 |
| 1903 | CONTIG67 | 86187  | 86456  | 1.41 | 6.84E-02 | transcription_start_site | - | 83047  | 83047  | -3274 | 17849 | AN4114 |
| 1903 | CONTIG67 | 86187  | 86456  | 1.41 | 6.84E-02 | transcription_start_site | - | 82344  | 82344  | -3977 | 17850 | AN4114 |
| 1903 | CONTIG67 | 86187  | 86456  | 1.41 | 6.84E-02 | transcription_start_site | - | 81341  | 81341  | -4980 | 17851 | AN4114 |
| 1903 | CONTIG67 | 86187  | 86456  | 1.41 | 6.84E-02 | transcription_start_site | + | 85629  | 85629  | 692   | 17855 | AN4115 |
| 1903 | CONTIG67 | 86187  | 86456  | 1.41 | 6.84E-02 | transcription_start_site | + | 85414  | 85414  | 907   | 17854 | AN4115 |
| 1695 | CONTIG67 | 93908  | 94267  | 1.5  | 5.22E-02 | transcription_start_site | - | 88961  | 88961  | -5126 | 17856 | AN4116 |
| 1695 | CONTIG67 | 93908  | 94267  | 1.5  | 5.22E-02 | transcription_start_site | - | 92350  | 92350  | -1737 | 17860 | AN4117 |
| 1695 | CONTIG67 | 93908  | 94267  | 1.5  | 5.22E-02 | transcription_start_site | - | 92097  | 92097  | -1990 | 17861 | AN4117 |
| 1695 | CONTIG67 | 93908  | 94267  | 1.5  | 5.22E-02 | transcription_start_site | - | 95224  | 95224  | 1136  | 17862 | AN4118 |
| 1695 | CONTIG67 | 93908  | 94267  | 1.5  | 5.22E-02 | transcription_start_site | + | 95525  | 95525  | -1437 | 17863 | AN4119 |
| 1695 | CONTIG67 | 93908  | 94267  | 1.5  | 5.22E-02 | transcription_start_site | + | 95747  | 95747  | -1659 | 17864 | AN4119 |
| 1695 | CONTIG67 | 93908  | 94267  | 1.5  | 5.22E-02 | transcription_start_site | + | 96810  | 96810  | -2722 | 17865 | AN4119 |
| 1695 | CONTIG67 | 93908  | 94267  | 1.5  | 5.22E-02 | transcription_start_site | + | 96995  | 96995  | -2907 | 17866 | AN4119 |
| 1490 | CONTIG67 | 103068 | 103492 | 1.59 | 2.18E-02 | transcription_start_site | - | 100963 | 100963 | -2317 | 17867 | AN4120 |
| 1490 | CONTIG67 | 103068 | 103492 | 1.59 | 2.18E-02 | transcription_start_site | - | 103697 | 103697 | 417   | 17869 | AN4121 |
| 1490 | CONTIG67 | 103068 | 103492 | 1.59 | 2.18E-02 | transcription_start_site | - | 102654 | 102654 | -626  | 17870 | AN4121 |
| 1490 | CONTIG67 | 103068 | 103492 | 1.59 | 2.18E-02 | transcription_start_site | - | 104038 | 104038 | 758   | 17868 | AN4121 |
| 2251 | CONTIG67 | 106883 | 107692 | 1.28 | 5.82E-02 | transcription_start_site | - | 104038 | 104038 | -3249 | 17868 | AN4121 |
| 2251 | CONTIG67 | 106883 | 107692 | 1.28 | 5.82E-02 | transcription_start_site | - | 103697 | 103697 | -3590 | 17869 | AN4121 |
| 2251 | CONTIG67 | 106883 | 107692 | 1.28 | 5.82E-02 | transcription_start_site | - | 102654 | 102654 | -4633 | 17870 | AN4121 |
| 2251 | CONTIG67 | 106883 | 107692 | 1.28 | 5.82E-02 | transcription_start_site | - | 106889 | 106889 | -398  | 17871 | AN4122 |
| 2251 | CONTIG67 | 106883 | 107692 | 1.28 | 5.82E-02 | transcription_start_site | - | 106298 | 106298 | -989  | 17872 | AN4122 |

|      |          |        |        |      |          |                          |   |        |        |       |       |        |
|------|----------|--------|--------|------|----------|--------------------------|---|--------|--------|-------|-------|--------|
| 2251 | CONTIG67 | 106883 | 107692 | 1.28 | 5.82E-02 | transcription_start_site | - | 105924 | 105924 | -1363 | 17873 | AN4122 |
| 2251 | CONTIG67 | 106883 | 107692 | 1.28 | 5.82E-02 | transcription_start_site | - | 105802 | 105802 | -1485 | 17874 | AN4122 |
| 1490 | CONTIG67 | 103068 | 103492 | 1.59 | 2.18E-02 | transcription_start_site | + | 107377 | 107377 | -4097 | 17875 | AN4123 |
| 2251 | CONTIG67 | 106883 | 107692 | 1.28 | 5.82E-02 | transcription_start_site | + | 107377 | 107377 | -89   | 17875 | AN4123 |
| 1491 | CONTIG67 | 112503 | 112852 | 1.59 | 3.70E-02 | transcription_start_site | - | 110438 | 110438 | -2239 | 17876 | AN4124 |
| 1491 | CONTIG67 | 112503 | 112852 | 1.59 | 3.70E-02 | transcription_start_site | - | 109062 | 109062 | -3615 | 17877 | AN4124 |
| 2251 | CONTIG67 | 106883 | 107692 | 1.28 | 5.82E-02 | transcription_start_site | + | 111068 | 111068 | -3780 | 17878 | AN4125 |
| 1491 | CONTIG67 | 112503 | 112852 | 1.59 | 3.70E-02 | transcription_start_site | + | 112740 | 112740 | -62   | 17881 | AN4126 |
| 1491 | CONTIG67 | 112503 | 112852 | 1.59 | 3.70E-02 | transcription_start_site | + | 112218 | 112218 | 459   | 17880 | AN4126 |
| 1491 | CONTIG67 | 112503 | 112852 | 1.59 | 3.70E-02 | transcription_start_site | + | 113167 | 113167 | -489  | 17882 | AN4126 |
| 1491 | CONTIG67 | 112503 | 112852 | 1.59 | 3.70E-02 | transcription_start_site | + | 112110 | 112110 | 567   | 17879 | AN4126 |
| 1491 | CONTIG67 | 112503 | 112852 | 1.59 | 3.70E-02 | transcription_start_site | + | 113704 | 113704 | -1026 | 17883 | AN4126 |
| 1491 | CONTIG67 | 112503 | 112852 | 1.59 | 3.70E-02 | transcription_start_site | + | 113881 | 113881 | -1203 | 17884 | AN4126 |
| 2251 | CONTIG67 | 106883 | 107692 | 1.28 | 5.82E-02 | transcription_start_site | + | 112110 | 112110 | -4822 | 17879 | AN4126 |
| 2251 | CONTIG67 | 106883 | 107692 | 1.28 | 5.82E-02 | transcription_start_site | + | 112218 | 112218 | -4930 | 17880 | AN4126 |
| 1491 | CONTIG67 | 112503 | 112852 | 1.59 | 3.70E-02 | transcription_start_site | + | 116383 | 116383 | -3705 | 17885 | AN4127 |
| 2750 | CONTIG67 | 147165 | 147444 | 1.1  | 1.93E-01 | transcription_start_site | - | 142392 | 142392 | -4912 | 17913 | AN4134 |
| 2750 | CONTIG67 | 147165 | 147444 | 1.1  | 1.93E-01 | transcription_start_site | - | 142311 | 142311 | -4993 | 17914 | AN4134 |
| 2750 | CONTIG67 | 147165 | 147444 | 1.1  | 1.93E-01 | transcription_start_site | + | 146941 | 146941 | 363   | 17921 | AN4136 |
| 2750 | CONTIG67 | 147165 | 147444 | 1.1  | 1.93E-01 | transcription_start_site | + | 146599 | 146599 | 705   | 17920 | AN4136 |
| 2750 | CONTIG67 | 147165 | 147444 | 1.1  | 1.93E-01 | transcription_start_site | + | 146404 | 146404 | 900   | 17919 | AN4136 |
| 2140 | CONTIG67 | 167345 | 167619 | 1.32 | 9.24E-02 | transcription_start_site | - | 164601 | 164601 | -2881 | 17940 | AN4142 |
| 2140 | CONTIG67 | 167345 | 167619 | 1.32 | 9.24E-02 | transcription_start_site | + | 168120 | 168120 | -638  | 17941 | AN4143 |
| 2140 | CONTIG67 | 167345 | 167619 | 1.32 | 9.24E-02 | transcription_start_site | + | 168732 | 168732 | -1250 | 17942 | AN4143 |
| 553  | CONTIG67 | 178885 | 179154 | 2.38 | 1.22E-03 | transcription_start_site | - | 176304 | 176304 | -2715 | 17945 | AN4145 |
| 553  | CONTIG67 | 178885 | 179154 | 2.38 | 1.22E-03 | transcription_start_site | - | 174729 | 174729 | -4290 | 17946 | AN4145 |
| 553  | CONTIG67 | 178885 | 179154 | 2.38 | 1.22E-03 | transcription_start_site | - | 174180 | 174180 | -4839 | 17947 | AN4145 |
| 1194 | CONTIG67 | 179195 | 180279 | 1.76 | 1.00E-02 | transcription_start_site | - | 176304 | 176304 | -3433 | 17945 | AN4145 |
| 1194 | CONTIG67 | 179195 | 180279 | 1.76 | 1.00E-02 | transcription_start_site | - | 174729 | 174729 | -5008 | 17946 | AN4145 |
| 553  | CONTIG67 | 178885 | 179154 | 2.38 | 1.22E-03 | transcription_start_site | - | 177258 | 177258 | -1761 | 17949 | AN4146 |
| 1194 | CONTIG67 | 179195 | 180279 | 1.76 | 1.00E-02 | transcription_start_site | - | 177258 | 177258 | -2479 | 17949 | AN4146 |
| 553  | CONTIG67 | 178885 | 179154 | 2.38 | 1.22E-03 | transcription_start_site | + | 178716 | 178716 | 303   | 17951 | AN4147 |
| 553  | CONTIG67 | 178885 | 179154 | 2.38 | 1.22E-03 | transcription_start_site | + | 178061 | 178061 | 958   | 17950 | AN4147 |
| 1194 | CONTIG67 | 179195 | 180279 | 1.76 | 1.00E-02 | transcription_start_site | + | 178716 | 178716 | 1021  | 17951 | AN4147 |
| 553  | CONTIG67 | 178885 | 179154 | 2.38 | 1.22E-03 | transcription_start_site | + | 180804 | 180804 | -1784 | 17952 | AN4148 |
| 553  | CONTIG67 | 178885 | 179154 | 2.38 | 1.22E-03 | transcription_start_site | + | 181075 | 181075 | -2055 | 17953 | AN4148 |
| 553  | CONTIG67 | 178885 | 179154 | 2.38 | 1.22E-03 | transcription_start_site | + | 181349 | 181349 | -2329 | 17954 | AN4148 |
| 553  | CONTIG67 | 178885 | 179154 | 2.38 | 1.22E-03 | transcription_start_site | + | 182339 | 182339 | -3319 | 17955 | AN4148 |
| 1194 | CONTIG67 | 179195 | 180279 | 1.76 | 1.00E-02 | transcription_start_site | + | 180804 | 180804 | -1067 | 17952 | AN4148 |
| 1194 | CONTIG67 | 179195 | 180279 | 1.76 | 1.00E-02 | transcription_start_site | + | 181075 | 181075 | -1338 | 17953 | AN4148 |
| 1194 | CONTIG67 | 179195 | 180279 | 1.76 | 1.00E-02 | transcription_start_site | + | 181349 | 181349 | -1612 | 17954 | AN4148 |
| 1194 | CONTIG67 | 179195 | 180279 | 1.76 | 1.00E-02 | transcription_start_site | + | 182339 | 182339 | -2602 | 17955 | AN4148 |
| 693  | CONTIG67 | 197196 | 197695 | 2.2  | 3.03E-03 | transcription_start_site | - | 194277 | 194277 | -3168 | 17963 | AN4152 |
| 693  | CONTIG67 | 197196 | 197695 | 2.2  | 3.03E-03 | transcription_start_site | - | 194124 | 194124 | -3321 | 17964 | AN4152 |
| 693  | CONTIG67 | 197196 | 197695 | 2.2  | 3.03E-03 | transcription_start_site | - | 193978 | 193978 | -3467 | 17965 | AN4152 |
| 693  | CONTIG67 | 197196 | 197695 | 2.2  | 3.03E-03 | transcription_start_site | - | 192932 | 192932 | -4513 | 17966 | AN4152 |
| 693  | CONTIG67 | 197196 | 197695 | 2.2  | 3.03E-03 | transcription_start_site | - | 192574 | 192574 | -4871 | 17967 | AN4152 |
| 693  | CONTIG67 | 197196 | 197695 | 2.2  | 3.03E-03 | transcription_start_site | - | 196738 | 196738 | -707  | 17968 | AN4153 |
| 693  | CONTIG67 | 197196 | 197695 | 2.2  | 3.03E-03 | transcription_start_site | - | 196618 | 196618 | -827  | 17969 | AN4153 |
| 693  | CONTIG67 | 197196 | 197695 | 2.2  | 3.03E-03 | transcription_start_site | - | 196444 | 196444 | -1001 | 17970 | AN4153 |
| 693  | CONTIG67 | 197196 | 197695 | 2.2  | 3.03E-03 | transcription_start_site | - | 195930 | 195930 | -1515 | 17971 | AN4153 |
| 693  | CONTIG67 | 197196 | 197695 | 2.2  | 3.03E-03 | transcription_start_site | + | 197711 | 197711 | -265  | 17972 | AN4154 |
| 693  | CONTIG67 | 197196 | 197695 | 2.2  | 3.03E-03 | transcription_start_site | + | 201808 | 201808 | -4362 | 17975 | AN4156 |
| 693  | CONTIG67 | 197196 | 197695 | 2.2  | 3.03E-03 | transcription_start_site | + | 202018 | 202018 | -4572 | 17976 | AN4156 |
| 693  | CONTIG67 | 197196 | 197695 | 2.2  | 3.03E-03 | transcription_start_site | + | 202253 | 202253 | -4807 | 17977 | AN4156 |
| 693  | CONTIG67 | 197196 | 197695 | 2.2  | 3.03E-03 | transcription_start_site | + | 202631 | 202631 | -5185 | 17978 | AN4156 |
| 1394 | CONTIG67 | 210386 | 211564 | 1.63 | 1.23E-02 | transcription_start_site | - | 205963 | 205963 | -5012 | 17981 | AN4157 |

|      |          |        |        |      |          |                          |   |        |        |       |       |        |
|------|----------|--------|--------|------|----------|--------------------------|---|--------|--------|-------|-------|--------|
| 1394 | CONTIG67 | 210386 | 211564 | 1.63 | 1.23E-02 | transcription_start_site | - | 205609 | 205609 | -5366 | 17982 | AN4157 |
| 1394 | CONTIG67 | 210386 | 211564 | 1.63 | 1.23E-02 | transcription_start_site | - | 207896 | 207896 | -3079 | 17987 | AN4158 |
| 1394 | CONTIG67 | 210386 | 211564 | 1.63 | 1.23E-02 | transcription_start_site | - | 207684 | 207684 | -3291 | 17988 | AN4158 |
| 1394 | CONTIG67 | 210386 | 211564 | 1.63 | 1.23E-02 | transcription_start_site | - | 207499 | 207499 | -3476 | 17989 | AN4158 |
| 478  | CONTIG67 | 212930 | 213584 | 2.47 | 0.00E+00 | transcription_start_site | - | 211211 | 211211 | -2046 | 17990 | AN4159 |
| 478  | CONTIG67 | 212930 | 213584 | 2.47 | 0.00E+00 | transcription_start_site | - | 211148 | 211148 | -2109 | 17991 | AN4159 |
| 478  | CONTIG67 | 212930 | 213584 | 2.47 | 0.00E+00 | transcription_start_site | - | 211042 | 211042 | -2215 | 17992 | AN4159 |
| 478  | CONTIG67 | 212930 | 213584 | 2.47 | 0.00E+00 | transcription_start_site | - | 210781 | 210781 | -2476 | 17993 | AN4159 |
| 478  | CONTIG67 | 212930 | 213584 | 2.47 | 0.00E+00 | transcription_start_site | - | 209806 | 209806 | -3451 | 17994 | AN4159 |
| 1394 | CONTIG67 | 210386 | 211564 | 1.63 | 1.23E-02 | transcription_start_site | - | 211042 | 211042 | 67    | 17992 | AN4159 |
| 1394 | CONTIG67 | 210386 | 211564 | 1.63 | 1.23E-02 | transcription_start_site | - | 211148 | 211148 | 173   | 17991 | AN4159 |
| 1394 | CONTIG67 | 210386 | 211564 | 1.63 | 1.23E-02 | transcription_start_site | - | 210781 | 210781 | -194  | 17993 | AN4159 |
| 1394 | CONTIG67 | 210386 | 211564 | 1.63 | 1.23E-02 | transcription_start_site | - | 211211 | 211211 | 236   | 17990 | AN4159 |
| 1394 | CONTIG67 | 210386 | 211564 | 1.63 | 1.23E-02 | transcription_start_site | - | 209806 | 209806 | -1169 | 17994 | AN4159 |
| 2535 | CONTIG67 | 214576 | 214935 | 1.19 | 1.44E-01 | transcription_start_site | - | 211211 | 211211 | -3544 | 17990 | AN4159 |
| 2535 | CONTIG67 | 214576 | 214935 | 1.19 | 1.44E-01 | transcription_start_site | - | 211148 | 211148 | -3607 | 17991 | AN4159 |
| 2535 | CONTIG67 | 214576 | 214935 | 1.19 | 1.44E-01 | transcription_start_site | - | 211042 | 211042 | -3713 | 17992 | AN4159 |
| 2535 | CONTIG67 | 214576 | 214935 | 1.19 | 1.44E-01 | transcription_start_site | - | 210781 | 210781 | -3974 | 17993 | AN4159 |
| 2535 | CONTIG67 | 214576 | 214935 | 1.19 | 1.44E-01 | transcription_start_site | - | 209806 | 209806 | -4949 | 17994 | AN4159 |
| 478  | CONTIG67 | 212930 | 213584 | 2.47 | 0.00E+00 | transcription_start_site | - | 214387 | 214387 | 1130  | 17997 | AN4160 |
| 2535 | CONTIG67 | 214576 | 214935 | 1.19 | 1.44E-01 | transcription_start_site | - | 214387 | 214387 | -368  | 17997 | AN4160 |
| 2535 | CONTIG67 | 214576 | 214935 | 1.19 | 1.44E-01 | transcription_start_site | - | 215538 | 215538 | 782   | 17996 | AN4160 |
| 2003 | CONTIG67 | 232056 | 232490 | 1.37 | 6.16E-02 | transcription_start_site | - | 229289 | 229289 | -2984 | 18012 | AN4166 |
| 2003 | CONTIG67 | 232056 | 232490 | 1.37 | 6.16E-02 | transcription_start_site | - | 229117 | 229117 | -3156 | 18013 | AN4166 |
| 2003 | CONTIG67 | 232056 | 232490 | 1.37 | 6.16E-02 | transcription_start_site | - | 228861 | 228861 | -3412 | 18014 | AN4166 |
| 2003 | CONTIG67 | 232056 | 232490 | 1.37 | 6.16E-02 | transcription_start_site | - | 227874 | 227874 | -4399 | 18015 | AN4166 |
| 2003 | CONTIG67 | 232056 | 232490 | 1.37 | 6.16E-02 | transcription_start_site | - | 227524 | 227524 | -4749 | 18016 | AN4166 |
| 2003 | CONTIG67 | 232056 | 232490 | 1.37 | 6.16E-02 | transcription_start_site | - | 227268 | 227268 | -5005 | 18017 | AN4166 |
| 2003 | CONTIG67 | 232056 | 232490 | 1.37 | 6.16E-02 | transcription_start_site | - | 227138 | 227138 | -5135 | 18018 | AN4166 |
| 2003 | CONTIG67 | 232056 | 232490 | 1.37 | 6.16E-02 | transcription_start_site | - | 232312 | 232312 | 39    | 18019 | AN4167 |
| 2003 | CONTIG67 | 232056 | 232490 | 1.37 | 6.16E-02 | transcription_start_site | - | 231955 | 231955 | -318  | 18020 | AN4167 |
| 2003 | CONTIG67 | 232056 | 232490 | 1.37 | 6.16E-02 | transcription_start_site | + | 232740 | 232740 | -467  | 18021 | AN4168 |
| 2003 | CONTIG67 | 232056 | 232490 | 1.37 | 6.16E-02 | transcription_start_site | + | 232876 | 232876 | -603  | 18022 | AN4168 |
| 2003 | CONTIG67 | 232056 | 232490 | 1.37 | 6.16E-02 | transcription_start_site | + | 233041 | 233041 | -768  | 18023 | AN4168 |
| 2003 | CONTIG67 | 232056 | 232490 | 1.37 | 6.16E-02 | transcription_start_site | + | 234159 | 234159 | -1886 | 18024 | AN4168 |
| 2751 | CONTIG67 | 237542 | 237806 | 1.1  | 1.93E-01 | transcription_start_site | + | 238126 | 238126 | -452  | 18025 | AN4169 |
| 2751 | CONTIG67 | 237542 | 237806 | 1.1  | 1.93E-01 | transcription_start_site | + | 238365 | 238365 | -691  | 18026 | AN4169 |
| 2751 | CONTIG67 | 237542 | 237806 | 1.1  | 1.93E-01 | transcription_start_site | + | 240718 | 240718 | -3044 | 18027 | AN4169 |
| 519  | CONTIG67 | 244283 | 244797 | 2.42 | 1.01E-03 | transcription_start_site | + | 247018 | 247018 | -2478 | 18028 | AN4170 |
| 519  | CONTIG67 | 244283 | 244797 | 2.42 | 1.01E-03 | transcription_start_site | + | 247150 | 247150 | -2610 | 18029 | AN4170 |
| 519  | CONTIG67 | 244283 | 244797 | 2.42 | 1.01E-03 | transcription_start_site | + | 247358 | 247358 | -2818 | 18030 | AN4170 |
| 519  | CONTIG67 | 244283 | 244797 | 2.42 | 1.01E-03 | transcription_start_site | + | 247727 | 247727 | -3187 | 18031 | AN4170 |
| 519  | CONTIG67 | 244283 | 244797 | 2.42 | 1.01E-03 | transcription_start_site | + | 248206 | 248206 | -3666 | 18032 | AN4170 |
| 1123 | CONTIG67 | 246088 | 246437 | 1.81 | 1.57E-02 | transcription_start_site | + | 247018 | 247018 | -755  | 18028 | AN4170 |
| 1123 | CONTIG67 | 246088 | 246437 | 1.81 | 1.57E-02 | transcription_start_site | + | 247150 | 247150 | -887  | 18029 | AN4170 |
| 1123 | CONTIG67 | 246088 | 246437 | 1.81 | 1.57E-02 | transcription_start_site | + | 247358 | 247358 | -1095 | 18030 | AN4170 |
| 1123 | CONTIG67 | 246088 | 246437 | 1.81 | 1.57E-02 | transcription_start_site | + | 247727 | 247727 | -1464 | 18031 | AN4170 |
| 1123 | CONTIG67 | 246088 | 246437 | 1.81 | 1.57E-02 | transcription_start_site | + | 248206 | 248206 | -1943 | 18032 | AN4170 |
| 1123 | CONTIG67 | 246088 | 246437 | 1.81 | 1.57E-02 | transcription_start_site | + | 250289 | 250289 | -4026 | 18033 | AN4171 |
| 1123 | CONTIG67 | 246088 | 246437 | 1.81 | 1.57E-02 | transcription_start_site | + | 250491 | 250491 | -4228 | 18034 | AN4171 |
| 1123 | CONTIG67 | 246088 | 246437 | 1.81 | 1.57E-02 | transcription_start_site | + | 250688 | 250688 | -4425 | 18035 | AN4171 |
| 1123 | CONTIG67 | 246088 | 246437 | 1.81 | 1.57E-02 | transcription_start_site | + | 250831 | 250831 | -4568 | 18036 | AN4171 |
| 1904 | CONTIG67 | 249768 | 250032 | 1.41 | 6.84E-02 | transcription_start_site | + | 250289 | 250289 | -389  | 18033 | AN4171 |
| 1904 | CONTIG67 | 249768 | 250032 | 1.41 | 6.84E-02 | transcription_start_site | + | 250491 | 250491 | -591  | 18034 | AN4171 |
| 1904 | CONTIG67 | 249768 | 250032 | 1.41 | 6.84E-02 | transcription_start_site | + | 250688 | 250688 | -788  | 18035 | AN4171 |
| 1904 | CONTIG67 | 249768 | 250032 | 1.41 | 6.84E-02 | transcription_start_site | + | 250831 | 250831 | -931  | 18036 | AN4171 |
| 1897 | CONTIG67 | 252620 | 253109 | 1.41 | 5.05E-02 | transcription_start_site | - | 253258 | 253258 | 393   | 18038 | AN4172 |

|      |          |        |        |      |          |                          |   |        |        |       |       |        |
|------|----------|--------|--------|------|----------|--------------------------|---|--------|--------|-------|-------|--------|
| 1897 | CONTIG67 | 252620 | 253109 | 1.41 | 5.05E-02 | transcription_start_site | - | 253732 | 253732 | 867   | 18037 | AN4172 |
| 1718 | CONTIG68 | 15468  | 16267  | 1.49 | 4.36E-02 | transcription_start_site | - | 13101  | 13101  | -2766 | 18053 | AN4176 |
| 1718 | CONTIG68 | 15468  | 16267  | 1.49 | 4.36E-02 | transcription_start_site | - | 11361  | 11361  | -4506 | 18054 | AN4176 |
| 2040 | CONTIG68 | 16353  | 16720  | 1.36 | 6.84E-02 | transcription_start_site | - | 13101  | 13101  | -3435 | 18053 | AN4176 |
| 2040 | CONTIG68 | 16353  | 16720  | 1.36 | 6.84E-02 | transcription_start_site | - | 11361  | 11361  | -5175 | 18054 | AN4176 |
| 2724 | CONTIG68 | 17253  | 18292  | 1.11 | 1.11E-01 | transcription_start_site | - | 13101  | 13101  | -4671 | 18053 | AN4176 |
| 1718 | CONTIG68 | 15468  | 16267  | 1.49 | 4.36E-02 | transcription_start_site | + | 15634  | 15634  | 233   | 18058 | AN4178 |
| 1718 | CONTIG68 | 15468  | 16267  | 1.49 | 4.36E-02 | transcription_start_site | + | 15510  | 15510  | 357   | 18057 | AN4178 |
| 2040 | CONTIG68 | 16353  | 16720  | 1.36 | 6.84E-02 | transcription_start_site | + | 15634  | 15634  | 902   | 18058 | AN4178 |
| 2040 | CONTIG68 | 16353  | 16720  | 1.36 | 6.84E-02 | transcription_start_site | + | 15510  | 15510  | 1026  | 18057 | AN4178 |
| 1718 | CONTIG68 | 15468  | 16267  | 1.49 | 4.36E-02 | transcription_start_site | + | 21071  | 21071  | -5203 | 18059 | AN4180 |
| 2040 | CONTIG68 | 16353  | 16720  | 1.36 | 6.84E-02 | transcription_start_site | + | 21071  | 21071  | -4534 | 18059 | AN4180 |
| 2724 | CONTIG68 | 17253  | 18292  | 1.11 | 1.11E-01 | transcription_start_site | + | 21071  | 21071  | -3298 | 18059 | AN4180 |
| 2724 | CONTIG68 | 17253  | 18292  | 1.11 | 1.11E-01 | transcription_start_site | + | 21961  | 21961  | -4188 | 18060 | AN4180 |
| 2724 | CONTIG68 | 17253  | 18292  | 1.11 | 1.11E-01 | transcription_start_site | + | 22274  | 22274  | -4501 | 18061 | AN4180 |
| 857  | CONTIG68 | 54453  | 54727  | 2.05 | 4.61E-03 | transcription_start_site | - | 50236  | 50236  | -4354 | 18080 | AN4187 |
| 857  | CONTIG68 | 54453  | 54727  | 2.05 | 4.61E-03 | transcription_start_site | - | 50173  | 50173  | -4417 | 18081 | AN4187 |
| 857  | CONTIG68 | 54453  | 54727  | 2.05 | 4.61E-03 | transcription_start_site | - | 50083  | 50083  | -4507 | 18082 | AN4187 |
| 2733 | CONTIG68 | 50793  | 51074  | 1.11 | 1.66E-01 | transcription_start_site | - | 50236  | 50236  | -697  | 18080 | AN4187 |
| 2733 | CONTIG68 | 50793  | 51074  | 1.11 | 1.66E-01 | transcription_start_site | - | 50173  | 50173  | -760  | 18081 | AN4187 |
| 2733 | CONTIG68 | 50793  | 51074  | 1.11 | 1.66E-01 | transcription_start_site | - | 50083  | 50083  | -850  | 18082 | AN4187 |
| 857  | CONTIG68 | 54453  | 54727  | 2.05 | 4.61E-03 | transcription_start_site | + | 54074  | 54074  | 516   | 18086 | AN4188 |
| 857  | CONTIG68 | 54453  | 54727  | 2.05 | 4.61E-03 | transcription_start_site | + | 53867  | 53867  | 723   | 18085 | AN4188 |
| 2733 | CONTIG68 | 50793  | 51074  | 1.11 | 1.66E-01 | transcription_start_site | + | 52299  | 52299  | -1365 | 18084 | AN4188 |
| 2733 | CONTIG68 | 50793  | 51074  | 1.11 | 1.66E-01 | transcription_start_site | + | 53867  | 53867  | -2933 | 18085 | AN4188 |
| 2733 | CONTIG68 | 50793  | 51074  | 1.11 | 1.66E-01 | transcription_start_site | + | 54074  | 54074  | -3140 | 18086 | AN4188 |
| 899  | CONTIG68 | 58134  | 58403  | 2    | 5.20E-03 | transcription_start_site | - | 57823  | 57823  | -445  | 18087 | AN4189 |
| 899  | CONTIG68 | 58134  | 58403  | 2    | 5.20E-03 | transcription_start_site | - | 57063  | 57063  | -1205 | 18088 | AN4189 |
| 899  | CONTIG68 | 58134  | 58403  | 2    | 5.20E-03 | transcription_start_site | - | 56724  | 56724  | -1544 | 18089 | AN4189 |
| 899  | CONTIG68 | 58134  | 58403  | 2    | 5.20E-03 | transcription_start_site | - | 56312  | 56312  | -1956 | 18090 | AN4189 |
| 899  | CONTIG68 | 58134  | 58403  | 2    | 5.20E-03 | transcription_start_site | - | 56117  | 56117  | -2151 | 18091 | AN4189 |
| 1595 | CONTIG68 | 61521  | 62151  | 1.54 | 3.70E-02 | transcription_start_site | - | 57823  | 57823  | -4013 | 18087 | AN4189 |
| 1595 | CONTIG68 | 61521  | 62151  | 1.54 | 3.70E-02 | transcription_start_site | - | 57063  | 57063  | -4773 | 18088 | AN4189 |
| 1595 | CONTIG68 | 61521  | 62151  | 1.54 | 3.70E-02 | transcription_start_site | - | 56724  | 56724  | -5112 | 18089 | AN4189 |
| 899  | CONTIG68 | 58134  | 58403  | 2    | 5.20E-03 | transcription_start_site | + | 61788  | 61788  | -3519 | 18092 | AN4190 |
| 899  | CONTIG68 | 58134  | 58403  | 2    | 5.20E-03 | transcription_start_site | + | 62273  | 62273  | -4004 | 18093 | AN4190 |
| 1595 | CONTIG68 | 61521  | 62151  | 1.54 | 3.70E-02 | transcription_start_site | + | 61788  | 61788  | 48    | 18092 | AN4190 |
| 1595 | CONTIG68 | 61521  | 62151  | 1.54 | 3.70E-02 | transcription_start_site | + | 62273  | 62273  | -437  | 18093 | AN4190 |
| 1595 | CONTIG68 | 61521  | 62151  | 1.54 | 3.70E-02 | transcription_start_site | + | 64116  | 64116  | -2280 | 18094 | AN4191 |
| 1595 | CONTIG68 | 61521  | 62151  | 1.54 | 3.70E-02 | transcription_start_site | + | 64328  | 64328  | -2492 | 18095 | AN4191 |
| 1595 | CONTIG68 | 61521  | 62151  | 1.54 | 3.70E-02 | transcription_start_site | + | 64537  | 64537  | -2701 | 18096 | AN4191 |
| 2734 | CONTIG68 | 64662  | 64941  | 1.11 | 1.66E-01 | transcription_start_site | + | 64537  | 64537  | 264   | 18096 | AN4191 |
| 2734 | CONTIG68 | 64662  | 64941  | 1.11 | 1.66E-01 | transcription_start_site | + | 64328  | 64328  | 473   | 18095 | AN4191 |
| 2734 | CONTIG68 | 64662  | 64941  | 1.11 | 1.66E-01 | transcription_start_site | + | 64116  | 64116  | 685   | 18094 | AN4191 |
| 1595 | CONTIG68 | 61521  | 62151  | 1.54 | 3.70E-02 | transcription_start_site | + | 65956  | 65956  | -4120 | 18097 | AN4192 |
| 1595 | CONTIG68 | 61521  | 62151  | 1.54 | 3.70E-02 | transcription_start_site | + | 66497  | 66497  | -4661 | 18098 | AN4192 |
| 2734 | CONTIG68 | 64662  | 64941  | 1.11 | 1.66E-01 | transcription_start_site | + | 65956  | 65956  | -1154 | 18097 | AN4192 |
| 2734 | CONTIG68 | 64662  | 64941  | 1.11 | 1.66E-01 | transcription_start_site | + | 66497  | 66497  | -1695 | 18098 | AN4192 |
| 2734 | CONTIG68 | 64662  | 64941  | 1.11 | 1.66E-01 | transcription_start_site | + | 67711  | 67711  | -2909 | 18099 | AN4192 |
| 1811 | CONTIG68 | 72757  | 73027  | 1.45 | 5.22E-02 | transcription_start_site | - | 71221  | 71221  | -1671 | 18100 | AN4193 |
| 1811 | CONTIG68 | 72757  | 73027  | 1.45 | 5.22E-02 | transcription_start_site | - | 68771  | 68771  | -4121 | 18101 | AN4193 |
| 2254 | CONTIG68 | 86269  | 86678  | 1.28 | 7.25E-02 | transcription_start_site | - | 83061  | 83061  | -3412 | 18112 | AN4196 |
| 2254 | CONTIG68 | 86269  | 86678  | 1.28 | 7.25E-02 | transcription_start_site | - | 82977  | 82977  | -3496 | 18113 | AN4196 |
| 2254 | CONTIG68 | 86269  | 86678  | 1.28 | 7.25E-02 | transcription_start_site | + | 86252  | 86252  | 221   | 18119 | AN4197 |
| 2254 | CONTIG68 | 86269  | 86678  | 1.28 | 7.25E-02 | transcription_start_site | + | 85973  | 85973  | 500   | 18118 | AN4197 |
| 2254 | CONTIG68 | 86269  | 86678  | 1.28 | 7.25E-02 | transcription_start_site | + | 85530  | 85530  | 943   | 18117 | AN4197 |
| 2254 | CONTIG68 | 86269  | 86678  | 1.28 | 7.25E-02 | transcription_start_site | - | 87248  | 87248  | 774   | 18124 | AN4198 |



|      |          |        |        |      |          |                          |   |        |        |       |       |        |
|------|----------|--------|--------|------|----------|--------------------------|---|--------|--------|-------|-------|--------|
| 2254 | CONTIG68 | 86269  | 86678  | 1.28 | 7.25E-02 | transcription_start_site | - | 87515  | 87515  | 1041  | 18123 | AN4198 |
| 2254 | CONTIG68 | 86269  | 86678  | 1.28 | 7.25E-02 | transcription_start_site | - | 87637  | 87637  | 1163  | 18122 | AN4198 |
| 2735 | CONTIG68 | 92933  | 93209  | 1.11 | 1.66E-01 | transcription_start_site | - | 88406  | 88406  | -4665 | 18120 | AN4198 |
| 2735 | CONTIG68 | 92933  | 93209  | 1.11 | 1.66E-01 | transcription_start_site | - | 87933  | 87933  | -5138 | 18121 | AN4198 |
| 2735 | CONTIG68 | 92933  | 93209  | 1.11 | 1.66E-01 | transcription_start_site | + | 94267  | 94267  | -1196 | 18125 | AN4199 |
| 2800 | CONTIG68 | 109132 | 109420 | 1.07 | 1.93E-01 | transcription_start_site | - | 106827 | 106827 | -2449 | 18126 | AN4201 |
| 2800 | CONTIG68 | 109132 | 109420 | 1.07 | 1.93E-01 | transcription_start_site | - | 106625 | 106625 | -2651 | 18127 | AN4201 |
| 2800 | CONTIG68 | 109132 | 109420 | 1.07 | 1.93E-01 | transcription_start_site | - | 106338 | 106338 | -2938 | 18128 | AN4201 |
| 2800 | CONTIG68 | 109132 | 109420 | 1.07 | 1.93E-01 | transcription_start_site | - | 105833 | 105833 | -3443 | 18129 | AN4201 |
| 2800 | CONTIG68 | 109132 | 109420 | 1.07 | 1.93E-01 | transcription_start_site | - | 105145 | 105145 | -4131 | 18130 | AN4201 |
| 2800 | CONTIG68 | 109132 | 109420 | 1.07 | 1.93E-01 | transcription_start_site | - | 109117 | 109117 | -159  | 18131 | AN4202 |
| 2800 | CONTIG68 | 109132 | 109420 | 1.07 | 1.93E-01 | transcription_start_site | - | 108995 | 108995 | -281  | 18132 | AN4202 |
| 2800 | CONTIG68 | 109132 | 109420 | 1.07 | 1.93E-01 | transcription_start_site | - | 108661 | 108661 | -615  | 18133 | AN4202 |
| 2800 | CONTIG68 | 109132 | 109420 | 1.07 | 1.93E-01 | transcription_start_site | - | 108272 | 108272 | -1004 | 18134 | AN4202 |
| 239  | CONTIG68 | 119787 | 120056 | 2.86 | 0.00E+00 | transcription_start_site | + | 121654 | 121654 | -1732 | 18140 | AN4206 |
| 344  | CONTIG68 | 122112 | 122467 | 2.69 | 0.00E+00 | transcription_start_site | + | 121654 | 121654 | 635   | 18140 | AN4206 |
| 983  | CONTIG68 | 120977 | 121630 | 1.92 | 3.31E-03 | transcription_start_site | + | 121654 | 121654 | -350  | 18140 | AN4206 |
| 671  | CONTIG68 | 138162 | 138501 | 2.22 | 1.80E-03 | transcription_start_site | - | 137126 | 137126 | -1205 | 18156 | AN4210 |
| 671  | CONTIG68 | 138162 | 138501 | 2.22 | 1.80E-03 | transcription_start_site | - | 136811 | 136811 | -1520 | 18157 | AN4210 |
| 671  | CONTIG68 | 138162 | 138501 | 2.22 | 1.80E-03 | transcription_start_site | - | 136647 | 136647 | -1684 | 18158 | AN4210 |
| 671  | CONTIG68 | 138162 | 138501 | 2.22 | 1.80E-03 | transcription_start_site | - | 133797 | 133797 | -4534 | 18159 | AN4210 |
| 671  | CONTIG68 | 138162 | 138501 | 2.22 | 1.80E-03 | transcription_start_site | + | 139399 | 139399 | -1067 | 18160 | AN4211 |
| 671  | CONTIG68 | 138162 | 138501 | 2.22 | 1.80E-03 | transcription_start_site | + | 139763 | 139763 | -1431 | 18161 | AN4211 |
| 671  | CONTIG68 | 138162 | 138501 | 2.22 | 1.80E-03 | transcription_start_site | + | 141660 | 141660 | -3328 | 18162 | AN4211 |
| 671  | CONTIG68 | 138162 | 138501 | 2.22 | 1.80E-03 | transcription_start_site | + | 142185 | 142185 | -3853 | 18163 | AN4211 |
| 715  | CONTIG68 | 142207 | 142486 | 2.18 | 2.22E-03 | transcription_start_site | + | 142185 | 142185 | 161   | 18163 | AN4211 |
| 715  | CONTIG68 | 142207 | 142486 | 2.18 | 2.22E-03 | transcription_start_site | + | 141660 | 141660 | 686   | 18162 | AN4211 |
| 1271 | CONTIG68 | 149706 | 150052 | 1.71 | 1.84E-02 | transcription_start_site | - | 145786 | 145786 | -4093 | 18164 | AN4212 |
| 1271 | CONTIG68 | 149706 | 150052 | 1.71 | 1.84E-02 | transcription_start_site | - | 145398 | 145398 | -4481 | 18165 | AN4212 |
| 1271 | CONTIG68 | 149706 | 150052 | 1.71 | 1.84E-02 | transcription_start_site | - | 145256 | 145256 | -4623 | 18166 | AN4212 |
| 715  | CONTIG68 | 142207 | 142486 | 2.18 | 2.22E-03 | transcription_start_site | + | 147268 | 147268 | -4921 | 18167 | AN4213 |
| 1271 | CONTIG68 | 149706 | 150052 | 1.71 | 1.84E-02 | transcription_start_site | + | 150378 | 150378 | -499  | 18171 | AN4214 |
| 1271 | CONTIG68 | 149706 | 150052 | 1.71 | 1.84E-02 | transcription_start_site | + | 150558 | 150558 | -679  | 18172 | AN4214 |
| 2374 | CONTIG68 | 151431 | 151865 | 1.24 | 9.26E-02 | transcription_start_site | + | 150558 | 150558 | 1090  | 18172 | AN4214 |
| 1271 | CONTIG68 | 149706 | 150052 | 1.71 | 1.84E-02 | transcription_start_site | + | 152754 | 152754 | -2875 | 18173 | AN4215 |
| 1271 | CONTIG68 | 149706 | 150052 | 1.71 | 1.84E-02 | transcription_start_site | + | 152870 | 152870 | -2991 | 18174 | AN4215 |
| 1271 | CONTIG68 | 149706 | 150052 | 1.71 | 1.84E-02 | transcription_start_site | + | 153051 | 153051 | -3172 | 18175 | AN4215 |
| 2374 | CONTIG68 | 151431 | 151865 | 1.24 | 9.26E-02 | transcription_start_site | + | 152754 | 152754 | -1106 | 18173 | AN4215 |
| 2374 | CONTIG68 | 151431 | 151865 | 1.24 | 9.26E-02 | transcription_start_site | + | 152870 | 152870 | -1222 | 18174 | AN4215 |
| 2374 | CONTIG68 | 151431 | 151865 | 1.24 | 9.26E-02 | transcription_start_site | + | 153051 | 153051 | -1403 | 18175 | AN4215 |
| 2374 | CONTIG68 | 151431 | 151865 | 1.24 | 9.26E-02 | transcription_start_site | + | 155158 | 155158 | -3510 | 18177 | AN4217 |
| 2374 | CONTIG68 | 151431 | 151865 | 1.24 | 9.26E-02 | transcription_start_site | + | 155286 | 155286 | -3638 | 18178 | AN4217 |
| 2374 | CONTIG68 | 151431 | 151865 | 1.24 | 9.26E-02 | transcription_start_site | + | 155391 | 155391 | -3743 | 18179 | AN4217 |
| 400  | CONTIG68 | 161942 | 162207 | 2.6  | 2.39E-04 | transcription_start_site | - | 161800 | 161800 | -274  | 18180 | AN4218 |
| 400  | CONTIG68 | 161942 | 162207 | 2.6  | 2.39E-04 | transcription_start_site | - | 161734 | 161734 | -340  | 18181 | AN4218 |
| 400  | CONTIG68 | 161942 | 162207 | 2.6  | 2.39E-04 | transcription_start_site | - | 161611 | 161611 | -463  | 18182 | AN4218 |
| 400  | CONTIG68 | 161942 | 162207 | 2.6  | 2.39E-04 | transcription_start_site | - | 161361 | 161361 | -713  | 18183 | AN4218 |
| 2526 | CONTIG68 | 160427 | 161076 | 1.19 | 1.07E-01 | transcription_start_site | - | 161361 | 161361 | 609   | 18183 | AN4218 |
| 2526 | CONTIG68 | 160427 | 161076 | 1.19 | 1.07E-01 | transcription_start_site | - | 161611 | 161611 | 859   | 18182 | AN4218 |
| 2526 | CONTIG68 | 160427 | 161076 | 1.19 | 1.07E-01 | transcription_start_site | - | 161734 | 161734 | 982   | 18181 | AN4218 |
| 2526 | CONTIG68 | 160427 | 161076 | 1.19 | 1.07E-01 | transcription_start_site | - | 161800 | 161800 | 1048  | 18180 | AN4218 |
| 400  | CONTIG68 | 161942 | 162207 | 2.6  | 2.39E-04 | transcription_start_site | - | 162735 | 162735 | 660   | 18187 | AN4219 |
| 400  | CONTIG68 | 161942 | 162207 | 2.6  | 2.39E-04 | transcription_start_site | - | 163118 | 163118 | 1043  | 18186 | AN4219 |
| 400  | CONTIG68 | 161942 | 162207 | 2.6  | 2.39E-04 | transcription_start_site | + | 163801 | 163801 | -1726 | 18188 | AN4220 |
| 400  | CONTIG68 | 161942 | 162207 | 2.6  | 2.39E-04 | transcription_start_site | + | 163992 | 163992 | -1917 | 18189 | AN4220 |
| 400  | CONTIG68 | 161942 | 162207 | 2.6  | 2.39E-04 | transcription_start_site | + | 164071 | 164071 | -1996 | 18190 | AN4220 |
| 400  | CONTIG68 | 161942 | 162207 | 2.6  | 2.39E-04 | transcription_start_site | + | 164449 | 164449 | -2374 | 18191 | AN4220 |

|      |          |        |        |      |          |                          |   |        |        |       |       |        |
|------|----------|--------|--------|------|----------|--------------------------|---|--------|--------|-------|-------|--------|
| 2526 | CONTIG68 | 160427 | 161076 | 1.19 | 1.07E-01 | transcription_start_site | + | 163801 | 163801 | -3049 | 18188 | AN4220 |
| 2526 | CONTIG68 | 160427 | 161076 | 1.19 | 1.07E-01 | transcription_start_site | + | 163992 | 163992 | -3240 | 18189 | AN4220 |
| 2526 | CONTIG68 | 160427 | 161076 | 1.19 | 1.07E-01 | transcription_start_site | + | 164071 | 164071 | -3319 | 18190 | AN4220 |
| 2526 | CONTIG68 | 160427 | 161076 | 1.19 | 1.07E-01 | transcription_start_site | + | 164449 | 164449 | -3697 | 18191 | AN4220 |
| 2375 | CONTIG68 | 221115 | 221474 | 1.24 | 9.26E-02 | transcription_start_site | - | 216341 | 216341 | -4953 | 18233 | AN4237 |
| 401  | CONTIG68 | 222980 | 223329 | 2.6  | 2.39E-04 | transcription_start_site | - | 222390 | 222390 | -764  | 18235 | AN4238 |
| 401  | CONTIG68 | 222980 | 223329 | 2.6  | 2.39E-04 | transcription_start_site | - | 221934 | 221934 | -1220 | 18236 | AN4238 |
| 401  | CONTIG68 | 222980 | 223329 | 2.6  | 2.39E-04 | transcription_start_site | - | 220589 | 220589 | -2565 | 18237 | AN4238 |
| 1801 | CONTIG68 | 223965 | 224902 | 1.45 | 5.26E-03 | transcription_start_site | - | 222390 | 222390 | -2043 | 18235 | AN4238 |
| 1801 | CONTIG68 | 223965 | 224902 | 1.45 | 5.26E-03 | transcription_start_site | - | 221934 | 221934 | -2499 | 18236 | AN4238 |
| 1801 | CONTIG68 | 223965 | 224902 | 1.45 | 5.26E-03 | transcription_start_site | - | 220589 | 220589 | -3844 | 18237 | AN4238 |
| 2375 | CONTIG68 | 221115 | 221474 | 1.24 | 9.26E-02 | transcription_start_site | - | 221934 | 221934 | 639   | 18236 | AN4238 |
| 2375 | CONTIG68 | 221115 | 221474 | 1.24 | 9.26E-02 | transcription_start_site | - | 220589 | 220589 | -705  | 18237 | AN4238 |
| 2375 | CONTIG68 | 221115 | 221474 | 1.24 | 9.26E-02 | transcription_start_site | - | 222390 | 222390 | 1095  | 18235 | AN4238 |
| 401  | CONTIG68 | 222980 | 223329 | 2.6  | 2.39E-04 | transcription_start_site | + | 225186 | 225186 | -2031 | 18238 | AN4239 |
| 401  | CONTIG68 | 222980 | 223329 | 2.6  | 2.39E-04 | transcription_start_site | + | 225345 | 225345 | -2190 | 18239 | AN4239 |
| 401  | CONTIG68 | 222980 | 223329 | 2.6  | 2.39E-04 | transcription_start_site | + | 226542 | 226542 | -3387 | 18240 | AN4239 |
| 1801 | CONTIG68 | 223965 | 224902 | 1.45 | 5.26E-03 | transcription_start_site | + | 225186 | 225186 | -752  | 18238 | AN4239 |
| 1801 | CONTIG68 | 223965 | 224902 | 1.45 | 5.26E-03 | transcription_start_site | + | 225345 | 225345 | -911  | 18239 | AN4239 |
| 1801 | CONTIG68 | 223965 | 224902 | 1.45 | 5.26E-03 | transcription_start_site | + | 226542 | 226542 | -2108 | 18240 | AN4239 |
| 2375 | CONTIG68 | 221115 | 221474 | 1.24 | 9.26E-02 | transcription_start_site | + | 225186 | 225186 | -3891 | 18238 | AN4239 |
| 2375 | CONTIG68 | 221115 | 221474 | 1.24 | 9.26E-02 | transcription_start_site | + | 225345 | 225345 | -4050 | 18239 | AN4239 |
| 1425 | CONTIG68 | 232878 | 233302 | 1.62 | 2.62E-02 | transcription_start_site | - | 228658 | 228658 | -4432 | 18241 | AN4240 |
| 1425 | CONTIG68 | 232878 | 233302 | 1.62 | 2.62E-02 | transcription_start_site | - | 228425 | 228425 | -4665 | 18242 | AN4240 |
| 1425 | CONTIG68 | 232878 | 233302 | 1.62 | 2.62E-02 | transcription_start_site | - | 228168 | 228168 | -4922 | 18243 | AN4240 |
| 1425 | CONTIG68 | 232878 | 233302 | 1.62 | 2.62E-02 | transcription_start_site | - | 231245 | 231245 | -1845 | 18244 | AN4241 |
| 1425 | CONTIG68 | 232878 | 233302 | 1.62 | 2.62E-02 | transcription_start_site | - | 230936 | 230936 | -2154 | 18245 | AN4241 |
| 1425 | CONTIG68 | 232878 | 233302 | 1.62 | 2.62E-02 | transcription_start_site | - | 230604 | 230604 | -2486 | 18246 | AN4241 |
| 2796 | CONTIG68 | 234694 | 235108 | 1.07 | 1.79E-01 | transcription_start_site | - | 231245 | 231245 | -3656 | 18244 | AN4241 |
| 2796 | CONTIG68 | 234694 | 235108 | 1.07 | 1.79E-01 | transcription_start_site | - | 230936 | 230936 | -3965 | 18245 | AN4241 |
| 2796 | CONTIG68 | 234694 | 235108 | 1.07 | 1.79E-01 | transcription_start_site | - | 230604 | 230604 | -4297 | 18246 | AN4241 |
| 1425 | CONTIG68 | 232878 | 233302 | 1.62 | 2.62E-02 | transcription_start_site | + | 232197 | 232197 | 893   | 18248 | AN4242 |
| 1425 | CONTIG68 | 232878 | 233302 | 1.62 | 2.62E-02 | transcription_start_site | + | 234177 | 234177 | -1087 | 18249 | AN4243 |
| 1425 | CONTIG68 | 232878 | 233302 | 1.62 | 2.62E-02 | transcription_start_site | + | 234756 | 234756 | -1666 | 18250 | AN4243 |
| 1425 | CONTIG68 | 232878 | 233302 | 1.62 | 2.62E-02 | transcription_start_site | + | 235426 | 235426 | -2336 | 18251 | AN4243 |
| 1425 | CONTIG68 | 232878 | 233302 | 1.62 | 2.62E-02 | transcription_start_site | + | 236036 | 236036 | -2946 | 18252 | AN4243 |
| 2796 | CONTIG68 | 234694 | 235108 | 1.07 | 1.79E-01 | transcription_start_site | + | 234756 | 234756 | 145   | 18250 | AN4243 |
| 2796 | CONTIG68 | 234694 | 235108 | 1.07 | 1.79E-01 | transcription_start_site | + | 235426 | 235426 | -525  | 18251 | AN4243 |
| 2796 | CONTIG68 | 234694 | 235108 | 1.07 | 1.79E-01 | transcription_start_site | + | 234177 | 234177 | 724   | 18249 | AN4243 |
| 2796 | CONTIG68 | 234694 | 235108 | 1.07 | 1.79E-01 | transcription_start_site | + | 236036 | 236036 | -1135 | 18252 | AN4243 |
| 1425 | CONTIG68 | 232878 | 233302 | 1.62 | 2.62E-02 | transcription_start_site | + | 238166 | 238166 | -5076 | 18255 | AN4245 |
| 2796 | CONTIG68 | 234694 | 235108 | 1.07 | 1.79E-01 | transcription_start_site | + | 238166 | 238166 | -3265 | 18255 | AN4245 |
| 2796 | CONTIG68 | 234694 | 235108 | 1.07 | 1.79E-01 | transcription_start_site | + | 238418 | 238418 | -3517 | 18256 | AN4245 |
| 2796 | CONTIG68 | 234694 | 235108 | 1.07 | 1.79E-01 | transcription_start_site | + | 238550 | 238550 | -3649 | 18257 | AN4245 |
| 2796 | CONTIG68 | 234694 | 235108 | 1.07 | 1.79E-01 | transcription_start_site | + | 238802 | 238802 | -3901 | 18258 | AN4245 |
| 1353 | CONTIG68 | 246095 | 246504 | 1.66 | 2.12E-02 | transcription_start_site | - | 246194 | 246194 | -105  | 18260 | AN4247 |
| 1353 | CONTIG68 | 246095 | 246504 | 1.66 | 2.12E-02 | transcription_start_site | - | 246057 | 246057 | -242  | 18261 | AN4247 |
| 1353 | CONTIG68 | 246095 | 246504 | 1.66 | 2.12E-02 | transcription_start_site | - | 244478 | 244478 | -1821 | 18262 | AN4247 |
| 2636 | CONTIG68 | 249535 | 249814 | 1.15 | 1.44E-01 | transcription_start_site | - | 246194 | 246194 | -3480 | 18260 | AN4247 |
| 2636 | CONTIG68 | 249535 | 249814 | 1.15 | 1.44E-01 | transcription_start_site | - | 246057 | 246057 | -3617 | 18261 | AN4247 |
| 2636 | CONTIG68 | 249535 | 249814 | 1.15 | 1.44E-01 | transcription_start_site | - | 248599 | 248599 | -1075 | 18263 | AN4248 |
| 2636 | CONTIG68 | 249535 | 249814 | 1.15 | 1.44E-01 | transcription_start_site | - | 248374 | 248374 | -1300 | 18264 | AN4248 |
| 2636 | CONTIG68 | 249535 | 249814 | 1.15 | 1.44E-01 | transcription_start_site | - | 247870 | 247870 | -1804 | 18265 | AN4248 |
| 1353 | CONTIG68 | 246095 | 246504 | 1.66 | 2.12E-02 | transcription_start_site | + | 249283 | 249283 | -2983 | 18266 | AN4249 |
| 1353 | CONTIG68 | 246095 | 246504 | 1.66 | 2.12E-02 | transcription_start_site | + | 249586 | 249586 | -3286 | 18267 | AN4249 |
| 1353 | CONTIG68 | 246095 | 246504 | 1.66 | 2.12E-02 | transcription_start_site | + | 250261 | 250261 | -3961 | 18268 | AN4249 |
| 1353 | CONTIG68 | 246095 | 246504 | 1.66 | 2.12E-02 | transcription_start_site | + | 250317 | 250317 | -4017 | 18269 | AN4249 |

|               |        |        |      |          |                          |   |        |        |       |       |        |
|---------------|--------|--------|------|----------|--------------------------|---|--------|--------|-------|-------|--------|
| 2636 CONTIG68 | 249535 | 249814 | 1.15 | 1.44E-01 | transcription_start_site | + | 249586 | 249586 | 88    | 18267 | AN4249 |
| 2636 CONTIG68 | 249535 | 249814 | 1.15 | 1.44E-01 | transcription_start_site | + | 249283 | 249283 | 391   | 18266 | AN4249 |
| 2636 CONTIG68 | 249535 | 249814 | 1.15 | 1.44E-01 | transcription_start_site | + | 250261 | 250261 | -586  | 18268 | AN4249 |
| 2636 CONTIG68 | 249535 | 249814 | 1.15 | 1.44E-01 | transcription_start_site | + | 250317 | 250317 | -642  | 18269 | AN4249 |
| 877 CONTIG69  | 9310   | 9804   | 2.02 | 3.61E-03 | transcription_start_site | - | 6168   | 6168   | -3389 | 18275 | AN4251 |
| 877 CONTIG69  | 9310   | 9804   | 2.02 | 3.61E-03 | transcription_start_site | - | 6069   | 6069   | -3488 | 18276 | AN4251 |
| 877 CONTIG69  | 9310   | 9804   | 2.02 | 3.61E-03 | transcription_start_site | - | 5824   | 5824   | -3733 | 18277 | AN4251 |
| 1617 CONTIG69 | 9995   | 10494  | 1.53 | 3.08E-02 | transcription_start_site | - | 6168   | 6168   | -4076 | 18275 | AN4251 |
| 1617 CONTIG69 | 9995   | 10494  | 1.53 | 3.08E-02 | transcription_start_site | - | 6069   | 6069   | -4175 | 18276 | AN4251 |
| 1617 CONTIG69 | 9995   | 10494  | 1.53 | 3.08E-02 | transcription_start_site | - | 5824   | 5824   | -4420 | 18277 | AN4251 |
| 877 CONTIG69  | 9310   | 9804   | 2.02 | 3.61E-03 | transcription_start_site | - | 9256   | 9256   | -301  | 18278 | AN4252 |
| 877 CONTIG69  | 9310   | 9804   | 2.02 | 3.61E-03 | transcription_start_site | - | 8926   | 8926   | -631  | 18279 | AN4252 |
| 877 CONTIG69  | 9310   | 9804   | 2.02 | 3.61E-03 | transcription_start_site | - | 8784   | 8784   | -773  | 18280 | AN4252 |
| 1617 CONTIG69 | 9995   | 10494  | 1.53 | 3.08E-02 | transcription_start_site | - | 9256   | 9256   | -988  | 18278 | AN4252 |
| 1617 CONTIG69 | 9995   | 10494  | 1.53 | 3.08E-02 | transcription_start_site | - | 8926   | 8926   | -1318 | 18279 | AN4252 |
| 1617 CONTIG69 | 9995   | 10494  | 1.53 | 3.08E-02 | transcription_start_site | - | 8784   | 8784   | -1460 | 18280 | AN4252 |
| 2726 CONTIG69 | 11345  | 11852  | 1.11 | 1.44E-01 | transcription_start_site | - | 9256   | 9256   | -2342 | 18278 | AN4252 |
| 2726 CONTIG69 | 11345  | 11852  | 1.11 | 1.44E-01 | transcription_start_site | - | 8926   | 8926   | -2672 | 18279 | AN4252 |
| 2726 CONTIG69 | 11345  | 11852  | 1.11 | 1.44E-01 | transcription_start_site | - | 8784   | 8784   | -2814 | 18280 | AN4252 |
| 597 CONTIG69  | 15845  | 16196  | 2.31 | 9.51E-04 | transcription_start_site | - | 11387  | 11387  | -4633 | 18281 | AN4253 |
| 597 CONTIG69  | 15845  | 16196  | 2.31 | 9.51E-04 | transcription_start_site | - | 10981  | 10981  | -5039 | 18282 | AN4253 |
| 1617 CONTIG69 | 9995   | 10494  | 1.53 | 3.08E-02 | transcription_start_site | - | 10981  | 10981  | 736   | 18282 | AN4253 |
| 1617 CONTIG69 | 9995   | 10494  | 1.53 | 3.08E-02 | transcription_start_site | - | 11387  | 11387  | 1142  | 18281 | AN4253 |
| 2726 CONTIG69 | 11345  | 11852  | 1.11 | 1.44E-01 | transcription_start_site | - | 11387  | 11387  | -211  | 18281 | AN4253 |
| 2726 CONTIG69 | 11345  | 11852  | 1.11 | 1.44E-01 | transcription_start_site | - | 10981  | 10981  | -617  | 18282 | AN4253 |
| 877 CONTIG69  | 9310   | 9804   | 2.02 | 3.61E-03 | transcription_start_site | + | 12009  | 12009  | -2452 | 18283 | AN4254 |
| 877 CONTIG69  | 9310   | 9804   | 2.02 | 3.61E-03 | transcription_start_site | + | 12267  | 12267  | -2710 | 18284 | AN4254 |
| 877 CONTIG69  | 9310   | 9804   | 2.02 | 3.61E-03 | transcription_start_site | + | 12365  | 12365  | -2808 | 18285 | AN4254 |
| 1617 CONTIG69 | 9995   | 10494  | 1.53 | 3.08E-02 | transcription_start_site | + | 12009  | 12009  | -1764 | 18283 | AN4254 |
| 1617 CONTIG69 | 9995   | 10494  | 1.53 | 3.08E-02 | transcription_start_site | + | 12267  | 12267  | -2022 | 18284 | AN4254 |
| 1617 CONTIG69 | 9995   | 10494  | 1.53 | 3.08E-02 | transcription_start_site | + | 12365  | 12365  | -2120 | 18285 | AN4254 |
| 2726 CONTIG69 | 11345  | 11852  | 1.11 | 1.44E-01 | transcription_start_site | + | 12009  | 12009  | -410  | 18283 | AN4254 |
| 2726 CONTIG69 | 11345  | 11852  | 1.11 | 1.44E-01 | transcription_start_site | + | 12267  | 12267  | -668  | 18284 | AN4254 |
| 2726 CONTIG69 | 11345  | 11852  | 1.11 | 1.44E-01 | transcription_start_site | + | 12365  | 12365  | -766  | 18285 | AN4254 |
| 597 CONTIG69  | 15845  | 16196  | 2.31 | 9.51E-04 | transcription_start_site | - | 14686  | 14686  | -1334 | 18286 | AN4255 |
| 597 CONTIG69  | 15845  | 16196  | 2.31 | 9.51E-04 | transcription_start_site | + | 16953  | 16953  | -932  | 18287 | AN4256 |
| 597 CONTIG69  | 15845  | 16196  | 2.31 | 9.51E-04 | transcription_start_site | + | 17217  | 17217  | -1196 | 18288 | AN4256 |
| 597 CONTIG69  | 15845  | 16196  | 2.31 | 9.51E-04 | transcription_start_site | + | 17338  | 17338  | -1317 | 18289 | AN4256 |
| 597 CONTIG69  | 15845  | 16196  | 2.31 | 9.51E-04 | transcription_start_site | + | 20693  | 20693  | -4672 | 18290 | AN4257 |
| 597 CONTIG69  | 15845  | 16196  | 2.31 | 9.51E-04 | transcription_start_site | + | 20830  | 20830  | -4809 | 18291 | AN4257 |
| 597 CONTIG69  | 15845  | 16196  | 2.31 | 9.51E-04 | transcription_start_site | + | 21040  | 21040  | -5019 | 18292 | AN4257 |
| 2129 CONTIG69 | 23645  | 24144  | 1.32 | 5.05E-02 | transcription_start_site | + | 24068  | 24068  | -173  | 18293 | AN4258 |
| 2510 CONTIG69 | 25295  | 26169  | 1.2  | 9.26E-02 | transcription_start_site | - | 26044  | 26044  | 312   | 18295 | AN4259 |
| 2510 CONTIG69 | 25295  | 26169  | 1.2  | 9.26E-02 | transcription_start_site | - | 26352  | 26352  | 620   | 18294 | AN4259 |
| 2510 CONTIG69 | 25295  | 26169  | 1.2  | 9.26E-02 | transcription_start_site | - | 27022  | 27022  | 1290  | 18298 | AN4260 |
| 2510 CONTIG69 | 25295  | 26169  | 1.2  | 9.26E-02 | transcription_start_site | - | 27154  | 27154  | 1422  | 18297 | AN4260 |
| 2129 CONTIG69 | 23645  | 24144  | 1.32 | 5.05E-02 | transcription_start_site | + | 27857  | 27857  | -3962 | 18299 | AN4261 |
| 2510 CONTIG69 | 25295  | 26169  | 1.2  | 9.26E-02 | transcription_start_site | + | 27857  | 27857  | -2125 | 18299 | AN4261 |
| 2133 CONTIG69 | 45089  | 45358  | 1.32 | 6.84E-02 | transcription_start_site | - | 44910  | 44910  | -313  | 18304 | AN4265 |
| 2133 CONTIG69 | 45089  | 45358  | 1.32 | 6.84E-02 | transcription_start_site | - | 44810  | 44810  | -413  | 18305 | AN4265 |
| 2133 CONTIG69 | 45089  | 45358  | 1.32 | 6.84E-02 | transcription_start_site | - | 44137  | 44137  | -1086 | 18306 | AN4265 |
| 2133 CONTIG69 | 45089  | 45358  | 1.32 | 6.84E-02 | transcription_start_site | + | 45350  | 45350  | -126  | 18307 | AN4266 |
| 2133 CONTIG69 | 45089  | 45358  | 1.32 | 6.84E-02 | transcription_start_site | + | 45489  | 45489  | -265  | 18308 | AN4266 |
| 2133 CONTIG69 | 45089  | 45358  | 1.32 | 6.84E-02 | transcription_start_site | + | 45816  | 45816  | -592  | 18309 | AN4266 |
| 2632 CONTIG69 | 61511  | 61795  | 1.15 | 1.25E-01 | transcription_start_site | + | 61221  | 61221  | 432   | 18322 | AN4270 |
| 2632 CONTIG69 | 61511  | 61795  | 1.15 | 1.25E-01 | transcription_start_site | + | 60617  | 60617  | 1036  | 18321 | AN4270 |
| 1517 CONTIG69 | 68937  | 69295  | 1.57 | 2.62E-02 | transcription_start_site | - | 64832  | 64832  | -4284 | 18323 | AN4271 |

|               |       |       |      |          |                          |   |       |       |       |       |        |
|---------------|-------|-------|------|----------|--------------------------|---|-------|-------|-------|-------|--------|
| 1517 CONTIG69 | 68937 | 69295 | 1.57 | 2.62E-02 | transcription_start_site | - | 64712 | 64712 | -4404 | 18324 | AN4271 |
| 1517 CONTIG69 | 68937 | 69295 | 1.57 | 2.62E-02 | transcription_start_site | - | 64128 | 64128 | -4988 | 18325 | AN4271 |
| 1517 CONTIG69 | 68937 | 69295 | 1.57 | 2.62E-02 | transcription_start_site | - | 64016 | 64016 | -5100 | 18326 | AN4271 |
| 1517 CONTIG69 | 68937 | 69295 | 1.57 | 2.62E-02 | transcription_start_site | + | 68531 | 68531 | 585   | 18337 | AN4272 |
| 2632 CONTIG69 | 61511 | 61795 | 1.15 | 1.25E-01 | transcription_start_site | + | 65310 | 65310 | -3657 | 18328 | AN4272 |
| 2632 CONTIG69 | 61511 | 61795 | 1.15 | 1.25E-01 | transcription_start_site | + | 65445 | 65445 | -3792 | 18329 | AN4272 |
| 2632 CONTIG69 | 61511 | 61795 | 1.15 | 1.25E-01 | transcription_start_site | + | 66395 | 66395 | -4742 | 18330 | AN4272 |
| 2632 CONTIG69 | 61511 | 61795 | 1.15 | 1.25E-01 | transcription_start_site | + | 66776 | 66776 | -5123 | 18331 | AN4272 |
| 1517 CONTIG69 | 68937 | 69295 | 1.57 | 2.62E-02 | transcription_start_site | + | 69418 | 69418 | -302  | 18338 | AN4273 |
| 1517 CONTIG69 | 68937 | 69295 | 1.57 | 2.62E-02 | transcription_start_site | + | 70267 | 70267 | -1151 | 18339 | AN4273 |
| 1517 CONTIG69 | 68937 | 69295 | 1.57 | 2.62E-02 | transcription_start_site | + | 72442 | 72442 | -3326 | 18340 | AN4274 |
| 1517 CONTIG69 | 68937 | 69295 | 1.57 | 2.62E-02 | transcription_start_site | + | 72562 | 72562 | -3446 | 18341 | AN4274 |
| 1517 CONTIG69 | 68937 | 69295 | 1.57 | 2.62E-02 | transcription_start_site | + | 72757 | 72757 | -3641 | 18342 | AN4274 |
| 1208 CONTIG70 | 1126  | 2305  | 1.75 | 0.00E+00 | transcription_start_site | + | 1879  | 1879  | -163  | 18351 | AN4276 |
| 1208 CONTIG70 | 1126  | 2305  | 1.75 | 0.00E+00 | transcription_start_site | + | 1362  | 1362  | 353   | 18350 | AN4276 |
| 1208 CONTIG70 | 1126  | 2305  | 1.75 | 0.00E+00 | transcription_start_site | + | 1077  | 1077  | 638   | 18349 | AN4276 |
| 1208 CONTIG70 | 1126  | 2305  | 1.75 | 0.00E+00 | transcription_start_site | + | 1018  | 1018  | 697   | 18348 | AN4276 |
| 1208 CONTIG70 | 1126  | 2305  | 1.75 | 0.00E+00 | transcription_start_site | + | 2466  | 2466  | -750  | 18352 | AN4276 |
| 1803 CONTIG70 | 5871  | 6154  | 1.45 | 1.11E-02 | transcription_start_site | - | 5735  | 5735  | -277  | 18353 | AN4277 |
| 1803 CONTIG70 | 5871  | 6154  | 1.45 | 1.11E-02 | transcription_start_site | - | 5357  | 5357  | -655  | 18354 | AN4277 |
| 1803 CONTIG70 | 5871  | 6154  | 1.45 | 1.11E-02 | transcription_start_site | - | 5107  | 5107  | -905  | 18355 | AN4277 |
| 1803 CONTIG70 | 5871  | 6154  | 1.45 | 1.11E-02 | transcription_start_site | - | 4981  | 4981  | -1031 | 18356 | AN4277 |
| 1803 CONTIG70 | 5871  | 6154  | 1.45 | 1.11E-02 | transcription_start_site | - | 4401  | 4401  | -1611 | 18357 | AN4277 |
| 1803 CONTIG70 | 5871  | 6154  | 1.45 | 1.11E-02 | transcription_start_site | - | 4060  | 4060  | -1952 | 18358 | AN4277 |
| 1803 CONTIG70 | 5871  | 6154  | 1.45 | 1.11E-02 | transcription_start_site | - | 3892  | 3892  | -2120 | 18359 | AN4277 |
| 2629 CONTIG70 | 16881 | 17156 | 1.15 | 5.22E-02 | transcription_start_site | - | 12678 | 12678 | -4340 | 18360 | AN4278 |
| 2629 CONTIG70 | 16881 | 17156 | 1.15 | 5.22E-02 | transcription_start_site | - | 12289 | 12289 | -4729 | 18361 | AN4278 |
| 2629 CONTIG70 | 16881 | 17156 | 1.15 | 5.22E-02 | transcription_start_site | - | 12051 | 12051 | -4967 | 18362 | AN4278 |
| 2629 CONTIG70 | 16881 | 17156 | 1.15 | 5.22E-02 | transcription_start_site | - | 16887 | 16887 | -131  | 18377 | AN4280 |
| 2629 CONTIG70 | 16881 | 17156 | 1.15 | 5.22E-02 | transcription_start_site | - | 16701 | 16701 | -317  | 18378 | AN4280 |
| 2629 CONTIG70 | 16881 | 17156 | 1.15 | 5.22E-02 | transcription_start_site | - | 15921 | 15921 | -1097 | 18379 | AN4280 |
| 3021 CONTIG70 | 36537 | 36807 | 0.88 | 1.66E-01 | transcription_start_site | - | 33624 | 33624 | -3048 | 18410 | AN4286 |
| 3021 CONTIG70 | 36537 | 36807 | 0.88 | 1.66E-01 | transcription_start_site | - | 33354 | 33354 | -3318 | 18411 | AN4286 |
| 3021 CONTIG70 | 36537 | 36807 | 0.88 | 1.66E-01 | transcription_start_site | - | 32989 | 32989 | -3683 | 18412 | AN4286 |
| 3021 CONTIG70 | 36537 | 36807 | 0.88 | 1.66E-01 | transcription_start_site | - | 32649 | 32649 | -4023 | 18413 | AN4286 |
| 3021 CONTIG70 | 36537 | 36807 | 0.88 | 1.66E-01 | transcription_start_site | - | 32464 | 32464 | -4208 | 18414 | AN4286 |
| 3021 CONTIG70 | 36537 | 36807 | 0.88 | 1.66E-01 | transcription_start_site | - | 32121 | 32121 | -4551 | 18415 | AN4286 |
| 3021 CONTIG70 | 36537 | 36807 | 0.88 | 1.66E-01 | transcription_start_site | - | 31945 | 31945 | -4727 | 18416 | AN4286 |
| 3021 CONTIG70 | 36537 | 36807 | 0.88 | 1.66E-01 | transcription_start_site | - | 31792 | 31792 | -4880 | 18417 | AN4286 |
| 3021 CONTIG70 | 36537 | 36807 | 0.88 | 1.66E-01 | transcription_start_site | + | 36958 | 36958 | -286  | 18419 | AN4288 |
| 3021 CONTIG70 | 36537 | 36807 | 0.88 | 1.66E-01 | transcription_start_site | + | 37133 | 37133 | -461  | 18420 | AN4288 |
| 3021 CONTIG70 | 36537 | 36807 | 0.88 | 1.66E-01 | transcription_start_site | + | 37213 | 37213 | -541  | 18421 | AN4288 |
| 3021 CONTIG70 | 36537 | 36807 | 0.88 | 1.66E-01 | transcription_start_site | + | 37325 | 37325 | -653  | 18422 | AN4288 |
| 3021 CONTIG70 | 36537 | 36807 | 0.88 | 1.66E-01 | transcription_start_site | + | 37406 | 37406 | -734  | 18423 | AN4288 |
| 3021 CONTIG70 | 36537 | 36807 | 0.88 | 1.66E-01 | transcription_start_site | + | 37488 | 37488 | -816  | 18424 | AN4288 |
| 3021 CONTIG70 | 36537 | 36807 | 0.88 | 1.66E-01 | transcription_start_site | + | 39421 | 39421 | -2749 | 18425 | AN4288 |
| 347 CONTIG71  | 2102  | 2455  | 2.69 | 1.57E-02 | transcription_start_site | + | 3865  | 3865  | -1586 | 18426 | AN4289 |
| 347 CONTIG71  | 2102  | 2455  | 2.69 | 1.57E-02 | transcription_start_site | + | 6306  | 6306  | -4027 | 18427 | AN4289 |
| 347 CONTIG71  | 2102  | 2455  | 2.69 | 1.57E-02 | transcription_start_site | + | 6976  | 6976  | -4697 | 18428 | AN4289 |
| 348 CONTIG72  | 9607  | 9892  | 2.68 | 0.00E+00 | transcription_start_site | - | 9347  | 9347  | -402  | 18432 | AN4291 |
| 348 CONTIG72  | 9607  | 9892  | 2.68 | 0.00E+00 | transcription_start_site | - | 8815  | 8815  | -934  | 18433 | AN4291 |
| 348 CONTIG72  | 9607  | 9892  | 2.68 | 0.00E+00 | transcription_start_site | + | 10351 | 10351 | -601  | 18434 | AN4292 |
| 348 CONTIG72  | 9607  | 9892  | 2.68 | 0.00E+00 | transcription_start_site | + | 10445 | 10445 | -695  | 18435 | AN4292 |
| 348 CONTIG72  | 9607  | 9892  | 2.68 | 0.00E+00 | transcription_start_site | + | 10665 | 10665 | -915  | 18436 | AN4292 |
| 2524 CONTIG73 | 2182  | 2461  | 1.19 | 5.88E-02 | transcription_start_site | + | 2672  | 2672  | -350  | 18445 | AN4295 |
| 2524 CONTIG73 | 2182  | 2461  | 1.19 | 5.88E-02 | transcription_start_site | + | 2877  | 2877  | -555  | 18446 | AN4295 |
| 2915 CONTIG74 | 1806  | 2076  | 0.99 | 9.24E-02 | transcription_start_site | - | 1206  | 1206  | -735  | 18447 | AN4296 |

|               |       |       |      |          |                          |   |       |       |       |       |        |
|---------------|-------|-------|------|----------|--------------------------|---|-------|-------|-------|-------|--------|
| 2915 CONTIG74 | 1806  | 2076  | 0.99 | 9.24E-02 | transcription_start_site | - | 1116  | 1116  | -825  | 18448 | AN4296 |
| 2915 CONTIG74 | 1806  | 2076  | 0.99 | 9.24E-02 | transcription_start_site | - | 774   | 774   | -1167 | 18449 | AN4296 |
| 2915 CONTIG74 | 1806  | 2076  | 0.99 | 9.24E-02 | transcription_start_site | + | 2144  | 2144  | -203  | 18450 | AN4297 |
| 2915 CONTIG74 | 1806  | 2076  | 0.99 | 9.24E-02 | transcription_start_site | + | 2239  | 2239  | -298  | 18451 | AN4297 |
| 2915 CONTIG74 | 1806  | 2076  | 0.99 | 9.24E-02 | transcription_start_site | + | 2476  | 2476  | -535  | 18452 | AN4297 |
| 2915 CONTIG74 | 1806  | 2076  | 0.99 | 9.24E-02 | transcription_start_site | + | 2887  | 2887  | -946  | 18453 | AN4297 |
| 2915 CONTIG74 | 1806  | 2076  | 0.99 | 9.24E-02 | transcription_start_site | + | 3575  | 3575  | -1634 | 18454 | AN4298 |
| 2429 CONTIG74 | 6610  | 7329  | 1.22 | 3.08E-02 | transcription_start_site | + | 7256  | 7256  | -286  | 18455 | AN4299 |
| 2429 CONTIG74 | 6610  | 7329  | 1.22 | 3.08E-02 | transcription_start_site | + | 7321  | 7321  | -351  | 18456 | AN4299 |
| 2429 CONTIG74 | 6610  | 7329  | 1.22 | 3.08E-02 | transcription_start_site | + | 7676  | 7676  | -706  | 18457 | AN4299 |
| 2860 CONTIG74 | 8570  | 8836  | 1.03 | 8.01E-02 | transcription_start_site | + | 7676  | 7676  | 1027  | 18457 | AN4299 |
| 2429 CONTIG74 | 6610  | 7329  | 1.22 | 3.08E-02 | transcription_start_site | - | 8252  | 8252  | 1282  | 18460 | AN4300 |
| 2860 CONTIG74 | 8570  | 8836  | 1.03 | 8.01E-02 | transcription_start_site | - | 8802  | 8802  | 99    | 18459 | AN4300 |
| 2860 CONTIG74 | 8570  | 8836  | 1.03 | 8.01E-02 | transcription_start_site | - | 8911  | 8911  | 208   | 18458 | AN4300 |
| 2860 CONTIG74 | 8570  | 8836  | 1.03 | 8.01E-02 | transcription_start_site | - | 8252  | 8252  | -451  | 18460 | AN4300 |
| 2860 CONTIG74 | 8570  | 8836  | 1.03 | 8.01E-02 | transcription_start_site | - | 9823  | 9823  | 1120  | 18462 | AN4301 |
| 80 CONTIG75   | 22738 | 23077 | 3.3  | 0.00E+00 | transcription_start_site | - | 18043 | 18043 | -4864 | 18483 | AN4310 |
| 80 CONTIG75   | 22738 | 23077 | 3.3  | 0.00E+00 | transcription_start_site | - | 17885 | 17885 | -5022 | 18484 | AN4310 |
| 80 CONTIG75   | 22738 | 23077 | 3.3  | 0.00E+00 | transcription_start_site | - | 21521 | 21521 | -1386 | 18489 | AN4311 |
| 937 CONTIG75  | 23942 | 24366 | 1.97 | 9.21E-03 | transcription_start_site | - | 21521 | 21521 | -2633 | 18489 | AN4311 |
| 80 CONTIG75   | 22738 | 23077 | 3.3  | 0.00E+00 | transcription_start_site | - | 23774 | 23774 | 866   | 18492 | AN4312 |
| 937 CONTIG75  | 23942 | 24366 | 1.97 | 9.21E-03 | transcription_start_site | - | 23774 | 23774 | -380  | 18492 | AN4312 |
| 80 CONTIG75   | 22738 | 23077 | 3.3  | 0.00E+00 | transcription_start_site | + | 28036 | 28036 | -5128 | 18493 | AN4313 |
| 937 CONTIG75  | 23942 | 24366 | 1.97 | 9.21E-03 | transcription_start_site | + | 28036 | 28036 | -3882 | 18493 | AN4313 |
| 937 CONTIG75  | 23942 | 24366 | 1.97 | 9.21E-03 | transcription_start_site | + | 28540 | 28540 | -4386 | 18494 | AN4313 |
| 106 CONTIG75  | 35703 | 35993 | 3.2  | 0.00E+00 | transcription_start_site | - | 34069 | 34069 | -1779 | 18497 | AN4314 |
| 106 CONTIG75  | 35703 | 35993 | 3.2  | 0.00E+00 | transcription_start_site | - | 33880 | 33880 | -1968 | 18498 | AN4314 |
| 2274 CONTIG75 | 33318 | 33652 | 1.28 | 1.66E-01 | transcription_start_site | - | 33880 | 33880 | 395   | 18498 | AN4314 |
| 2274 CONTIG75 | 33318 | 33652 | 1.28 | 1.66E-01 | transcription_start_site | - | 34069 | 34069 | 584   | 18497 | AN4314 |
| 106 CONTIG75  | 35703 | 35993 | 3.2  | 0.00E+00 | transcription_start_site | + | 37528 | 37528 | -1680 | 18499 | AN4315 |
| 106 CONTIG75  | 35703 | 35993 | 3.2  | 0.00E+00 | transcription_start_site | + | 37645 | 37645 | -1797 | 18500 | AN4315 |
| 106 CONTIG75  | 35703 | 35993 | 3.2  | 0.00E+00 | transcription_start_site | + | 38416 | 38416 | -2568 | 18501 | AN4315 |
| 106 CONTIG75  | 35703 | 35993 | 3.2  | 0.00E+00 | transcription_start_site | + | 38544 | 38544 | -2696 | 18502 | AN4315 |
| 106 CONTIG75  | 35703 | 35993 | 3.2  | 0.00E+00 | transcription_start_site | + | 38894 | 38894 | -3046 | 18503 | AN4315 |
| 106 CONTIG75  | 35703 | 35993 | 3.2  | 0.00E+00 | transcription_start_site | + | 39119 | 39119 | -3271 | 18504 | AN4315 |
| 106 CONTIG75  | 35703 | 35993 | 3.2  | 0.00E+00 | transcription_start_site | + | 39258 | 39258 | -3410 | 18505 | AN4315 |
| 106 CONTIG75  | 35703 | 35993 | 3.2  | 0.00E+00 | transcription_start_site | + | 39772 | 39772 | -3924 | 18506 | AN4315 |
| 2274 CONTIG75 | 33318 | 33652 | 1.28 | 1.66E-01 | transcription_start_site | + | 37528 | 37528 | -4043 | 18499 | AN4315 |
| 2274 CONTIG75 | 33318 | 33652 | 1.28 | 1.66E-01 | transcription_start_site | + | 37645 | 37645 | -4160 | 18500 | AN4315 |
| 2274 CONTIG75 | 33318 | 33652 | 1.28 | 1.66E-01 | transcription_start_site | + | 38416 | 38416 | -4931 | 18501 | AN4315 |
| 2274 CONTIG75 | 33318 | 33652 | 1.28 | 1.66E-01 | transcription_start_site | + | 38544 | 38544 | -5059 | 18502 | AN4315 |
| 367 CONTIG75  | 68183 | 68615 | 2.66 | 1.22E-03 | transcription_start_site | + | 69057 | 69057 | -658  | 18533 | AN4324 |
| 367 CONTIG75  | 68183 | 68615 | 2.66 | 1.22E-03 | transcription_start_site | + | 69264 | 69264 | -865  | 18534 | AN4324 |
| 681 CONTIG75  | 69471 | 69740 | 2.22 | 7.85E-03 | transcription_start_site | + | 69264 | 69264 | 341   | 18534 | AN4324 |
| 681 CONTIG75  | 69471 | 69740 | 2.22 | 7.85E-03 | transcription_start_site | + | 69057 | 69057 | 548   | 18533 | AN4324 |
| 595 CONTIG75  | 70811 | 71375 | 2.32 | 5.20E-03 | transcription_start_site | - | 72219 | 72219 | 1126  | 18539 | AN4325 |
| 595 CONTIG75  | 70811 | 71375 | 2.32 | 5.20E-03 | transcription_start_site | - | 72328 | 72328 | 1235  | 18538 | AN4325 |
| 1408 CONTIG75 | 85744 | 86022 | 1.63 | 5.88E-02 | transcription_start_site | - | 84276 | 84276 | -1607 | 18540 | AN4328 |
| 1408 CONTIG75 | 85744 | 86022 | 1.63 | 5.88E-02 | transcription_start_site | - | 83535 | 83535 | -2348 | 18541 | AN4328 |
| 1408 CONTIG75 | 85744 | 86022 | 1.63 | 5.88E-02 | transcription_start_site | - | 83320 | 83320 | -2563 | 18542 | AN4328 |
| 1408 CONTIG75 | 85744 | 86022 | 1.63 | 5.88E-02 | transcription_start_site | - | 82410 | 82410 | -3473 | 18543 | AN4328 |
| 1408 CONTIG75 | 85744 | 86022 | 1.63 | 5.88E-02 | transcription_start_site | - | 81985 | 81985 | -3898 | 18544 | AN4328 |
| 1408 CONTIG75 | 85744 | 86022 | 1.63 | 5.88E-02 | transcription_start_site | + | 86086 | 86086 | -203  | 18545 | AN4329 |
| 1408 CONTIG75 | 85744 | 86022 | 1.63 | 5.88E-02 | transcription_start_site | + | 86298 | 86298 | -415  | 18546 | AN4329 |
| 1408 CONTIG75 | 85744 | 86022 | 1.63 | 5.88E-02 | transcription_start_site | + | 86479 | 86479 | -596  | 18547 | AN4329 |
| 941 CONTIG75  | 93680 | 93969 | 1.97 | 1.84E-02 | transcription_start_site | - | 89160 | 89160 | -4664 | 18548 | AN4330 |
| 1408 CONTIG75 | 85744 | 86022 | 1.63 | 5.88E-02 | transcription_start_site | + | 89332 | 89332 | -3449 | 18549 | AN4331 |

|      |          |        |        |      |          |                          |   |        |        |       |       |        |
|------|----------|--------|--------|------|----------|--------------------------|---|--------|--------|-------|-------|--------|
| 941  | CONTIG75 | 93680  | 93969  | 1.97 | 1.84E-02 | transcription_start_site | - | 92937  | 92937  | -887  | 18550 | AN4332 |
| 941  | CONTIG75 | 93680  | 93969  | 1.97 | 1.84E-02 | transcription_start_site | - | 92718  | 92718  | -1106 | 18551 | AN4332 |
| 941  | CONTIG75 | 93680  | 93969  | 1.97 | 1.84E-02 | transcription_start_site | - | 92358  | 92358  | -1466 | 18552 | AN4332 |
| 941  | CONTIG75 | 93680  | 93969  | 1.97 | 1.84E-02 | transcription_start_site | - | 92020  | 92020  | -1804 | 18553 | AN4332 |
| 941  | CONTIG75 | 93680  | 93969  | 1.97 | 1.84E-02 | transcription_start_site | - | 94819  | 94819  | 994   | 18555 | AN4333 |
| 941  | CONTIG75 | 93680  | 93969  | 1.97 | 1.84E-02 | transcription_start_site | - | 94879  | 94879  | 1054  | 18554 | AN4333 |
| 1974 | CONTIG75 | 98405  | 100939 | 1.38 | 3.64E-02 | transcription_start_site | - | 94879  | 94879  | -4793 | 18554 | AN4333 |
| 1974 | CONTIG75 | 98405  | 100939 | 1.38 | 3.64E-02 | transcription_start_site | - | 94819  | 94819  | -4853 | 18555 | AN4333 |
| 1974 | CONTIG75 | 98405  | 100939 | 1.38 | 3.64E-02 | transcription_start_site | - | 101493 | 101493 | 1821  | 18557 | AN4335 |
| 1974 | CONTIG75 | 98405  | 100939 | 1.38 | 3.64E-02 | transcription_start_site | + | 104205 | 104205 | -4533 | 18558 | AN4336 |
| 1974 | CONTIG75 | 98405  | 100939 | 1.38 | 3.64E-02 | transcription_start_site | + | 104606 | 104606 | -4934 | 18559 | AN4336 |
| 1974 | CONTIG75 | 98405  | 100939 | 1.38 | 3.64E-02 | transcription_start_site | + | 105132 | 105132 | -5460 | 18560 | AN4336 |
| 1974 | CONTIG75 | 98405  | 100939 | 1.38 | 3.64E-02 | transcription_start_site | + | 105461 | 105461 | -5789 | 18561 | AN4336 |
| 1974 | CONTIG75 | 98405  | 100939 | 1.38 | 3.64E-02 | transcription_start_site | + | 105617 | 105617 | -5945 | 18562 | AN4336 |
| 1409 | CONTIG75 | 114526 | 114815 | 1.63 | 5.88E-02 | transcription_start_site | - | 109578 | 109578 | -5092 | 18569 | AN4338 |
| 1409 | CONTIG75 | 114526 | 114815 | 1.63 | 5.88E-02 | transcription_start_site | + | 114880 | 114880 | -209  | 18582 | AN4340 |
| 1409 | CONTIG75 | 114526 | 114815 | 1.63 | 5.88E-02 | transcription_start_site | + | 115022 | 115022 | -351  | 18583 | AN4340 |
| 1409 | CONTIG75 | 114526 | 114815 | 1.63 | 5.88E-02 | transcription_start_site | + | 115265 | 115265 | -594  | 18584 | AN4340 |
| 1409 | CONTIG75 | 114526 | 114815 | 1.63 | 5.88E-02 | transcription_start_site | + | 117228 | 117228 | -2557 | 18586 | AN4342 |
| 1409 | CONTIG75 | 114526 | 114815 | 1.63 | 5.88E-02 | transcription_start_site | + | 117369 | 117369 | -2698 | 18587 | AN4342 |
| 1409 | CONTIG75 | 114526 | 114815 | 1.63 | 5.88E-02 | transcription_start_site | + | 117634 | 117634 | -2963 | 18588 | AN4342 |
| 1409 | CONTIG75 | 114526 | 114815 | 1.63 | 5.88E-02 | transcription_start_site | + | 119673 | 119673 | -5002 | 18589 | AN4343 |
| 824  | CONTIG75 | 133439 | 133793 | 2.07 | 5.41E-03 | transcription_start_site | - | 129290 | 129290 | -4326 | 18607 | AN4346 |
| 824  | CONTIG75 | 133439 | 133793 | 2.07 | 5.41E-03 | transcription_start_site | - | 129208 | 129208 | -4408 | 18608 | AN4346 |
| 824  | CONTIG75 | 133439 | 133793 | 2.07 | 5.41E-03 | transcription_start_site | - | 128548 | 128548 | -5068 | 18609 | AN4346 |
| 1410 | CONTIG75 | 134044 | 134918 | 1.63 | 5.88E-02 | transcription_start_site | - | 129290 | 129290 | -5191 | 18607 | AN4346 |
| 1410 | CONTIG75 | 134044 | 134918 | 1.63 | 5.88E-02 | transcription_start_site | - | 129208 | 129208 | -5273 | 18608 | AN4346 |
| 824  | CONTIG75 | 133439 | 133793 | 2.07 | 5.41E-03 | transcription_start_site | - | 132487 | 132487 | -1129 | 18616 | AN4348 |
| 1410 | CONTIG75 | 134044 | 134918 | 1.63 | 5.88E-02 | transcription_start_site | - | 132487 | 132487 | -1994 | 18616 | AN4348 |
| 824  | CONTIG75 | 133439 | 133793 | 2.07 | 5.41E-03 | transcription_start_site | + | 134902 | 134902 | -1286 | 18617 | AN4349 |
| 824  | CONTIG75 | 133439 | 133793 | 2.07 | 5.41E-03 | transcription_start_site | + | 135625 | 135625 | -2009 | 18618 | AN4349 |
| 824  | CONTIG75 | 133439 | 133793 | 2.07 | 5.41E-03 | transcription_start_site | + | 137988 | 137988 | -4372 | 18619 | AN4349 |
| 824  | CONTIG75 | 133439 | 133793 | 2.07 | 5.41E-03 | transcription_start_site | + | 138292 | 138292 | -4676 | 18620 | AN4349 |
| 1410 | CONTIG75 | 134044 | 134918 | 1.63 | 5.88E-02 | transcription_start_site | + | 134902 | 134902 | -421  | 18617 | AN4349 |
| 1410 | CONTIG75 | 134044 | 134918 | 1.63 | 5.88E-02 | transcription_start_site | + | 135625 | 135625 | -1144 | 18618 | AN4349 |
| 1410 | CONTIG75 | 134044 | 134918 | 1.63 | 5.88E-02 | transcription_start_site | + | 137988 | 137988 | -3507 | 18619 | AN4349 |
| 1410 | CONTIG75 | 134044 | 134918 | 1.63 | 5.88E-02 | transcription_start_site | + | 138292 | 138292 | -3811 | 18620 | AN4349 |
| 727  | CONTIG75 | 152115 | 153209 | 2.17 | 0.00E+00 | transcription_start_site | - | 150145 | 150145 | -2517 | 18621 | AN4351 |
| 727  | CONTIG75 | 152115 | 153209 | 2.17 | 0.00E+00 | transcription_start_site | - | 150088 | 150088 | -2574 | 18622 | AN4351 |
| 727  | CONTIG75 | 152115 | 153209 | 2.17 | 0.00E+00 | transcription_start_site | - | 149800 | 149800 | -2862 | 18623 | AN4351 |
| 727  | CONTIG75 | 152115 | 153209 | 2.17 | 0.00E+00 | transcription_start_site | - | 149693 | 149693 | -2969 | 18624 | AN4351 |
| 727  | CONTIG75 | 152115 | 153209 | 2.17 | 0.00E+00 | transcription_start_site | - | 148753 | 148753 | -3909 | 18625 | AN4351 |
| 727  | CONTIG75 | 152115 | 153209 | 2.17 | 0.00E+00 | transcription_start_site | - | 147725 | 147725 | -4937 | 18626 | AN4351 |
| 2275 | CONTIG75 | 148430 | 148934 | 1.28 | 1.66E-01 | transcription_start_site | - | 148753 | 148753 | 71    | 18625 | AN4351 |
| 2275 | CONTIG75 | 148430 | 148934 | 1.28 | 1.66E-01 | transcription_start_site | - | 147725 | 147725 | -957  | 18626 | AN4351 |
| 2275 | CONTIG75 | 148430 | 148934 | 1.28 | 1.66E-01 | transcription_start_site | - | 149693 | 149693 | 1011  | 18624 | AN4351 |
| 2275 | CONTIG75 | 148430 | 148934 | 1.28 | 1.66E-01 | transcription_start_site | - | 149800 | 149800 | 1118  | 18623 | AN4351 |
| 727  | CONTIG75 | 152115 | 153209 | 2.17 | 0.00E+00 | transcription_start_site | - | 151680 | 151680 | -982  | 18627 | AN4352 |
| 727  | CONTIG75 | 152115 | 153209 | 2.17 | 0.00E+00 | transcription_start_site | - | 151443 | 151443 | -1219 | 18628 | AN4352 |
| 727  | CONTIG75 | 152115 | 153209 | 2.17 | 0.00E+00 | transcription_start_site | - | 151338 | 151338 | -1324 | 18629 | AN4352 |
| 727  | CONTIG75 | 152115 | 153209 | 2.17 | 0.00E+00 | transcription_start_site | - | 150991 | 150991 | -1671 | 18630 | AN4352 |
| 727  | CONTIG75 | 152115 | 153209 | 2.17 | 0.00E+00 | transcription_start_site | - | 150592 | 150592 | -2070 | 18631 | AN4352 |
| 727  | CONTIG75 | 152115 | 153209 | 2.17 | 0.00E+00 | transcription_start_site | + | 153479 | 153479 | -817  | 18632 | AN4353 |
| 727  | CONTIG75 | 152115 | 153209 | 2.17 | 0.00E+00 | transcription_start_site | + | 154022 | 154022 | -1360 | 18633 | AN4353 |
| 2275 | CONTIG75 | 148430 | 148934 | 1.28 | 1.66E-01 | transcription_start_site | + | 153479 | 153479 | -4797 | 18632 | AN4353 |
| 727  | CONTIG75 | 152115 | 153209 | 2.17 | 0.00E+00 | transcription_start_site | + | 156103 | 156103 | -3441 | 18634 | AN4354 |
| 727  | CONTIG75 | 152115 | 153209 | 2.17 | 0.00E+00 | transcription_start_site | + | 156290 | 156290 | -3628 | 18635 | AN4354 |



|      |          |        |        |      |          |                          |   |        |        |       |       |        |
|------|----------|--------|--------|------|----------|--------------------------|---|--------|--------|-------|-------|--------|
| 727  | CONTIG75 | 152115 | 153209 | 2.17 | 0.00E+00 | transcription_start_site | + | 156814 | 156814 | -4152 | 18636 | AN4354 |
| 780  | CONTIG75 | 165320 | 165894 | 2.12 | 1.11E-02 | transcription_start_site | - | 165344 | 165344 | -263  | 18644 | AN4357 |
| 780  | CONTIG75 | 165320 | 165894 | 2.12 | 1.11E-02 | transcription_start_site | - | 165140 | 165140 | -467  | 18645 | AN4357 |
| 780  | CONTIG75 | 165320 | 165894 | 2.12 | 1.11E-02 | transcription_start_site | - | 164401 | 164401 | -1206 | 18646 | AN4357 |
| 780  | CONTIG75 | 165320 | 165894 | 2.12 | 1.11E-02 | transcription_start_site | - | 164246 | 164246 | -1361 | 18647 | AN4357 |
| 44   | CONTIG75 | 173930 | 174354 | 3.45 | 0.00E+00 | transcription_start_site | - | 169295 | 169295 | -4847 | 18648 | AN4358 |
| 44   | CONTIG75 | 173930 | 174354 | 3.45 | 0.00E+00 | transcription_start_site | - | 169189 | 169189 | -4953 | 18649 | AN4358 |
| 780  | CONTIG75 | 165320 | 165894 | 2.12 | 1.11E-02 | transcription_start_site | + | 169738 | 169738 | -4131 | 18652 | AN4359 |
| 780  | CONTIG75 | 165320 | 165894 | 2.12 | 1.11E-02 | transcription_start_site | + | 170094 | 170094 | -4487 | 18653 | AN4359 |
| 780  | CONTIG75 | 165320 | 165894 | 2.12 | 1.11E-02 | transcription_start_site | + | 170366 | 170366 | -4759 | 18654 | AN4359 |
| 780  | CONTIG75 | 165320 | 165894 | 2.12 | 1.11E-02 | transcription_start_site | + | 170476 | 170476 | -4869 | 18655 | AN4359 |
| 780  | CONTIG75 | 165320 | 165894 | 2.12 | 1.11E-02 | transcription_start_site | + | 170770 | 170770 | -5163 | 18656 | AN4359 |
| 44   | CONTIG75 | 173930 | 174354 | 3.45 | 0.00E+00 | transcription_start_site | - | 173101 | 173101 | -1041 | 18658 | AN4360 |
| 831  | CONTIG75 | 176405 | 176681 | 2.07 | 1.30E-02 | transcription_start_site | - | 173101 | 173101 | -3442 | 18658 | AN4360 |
| 2421 | CONTIG75 | 175440 | 176314 | 1.23 | 1.79E-01 | transcription_start_site | - | 173101 | 173101 | -2776 | 18658 | AN4360 |
| 44   | CONTIG75 | 173930 | 174354 | 3.45 | 0.00E+00 | transcription_start_site | + | 174673 | 174673 | -531  | 18659 | AN4361 |
| 44   | CONTIG75 | 173930 | 174354 | 3.45 | 0.00E+00 | transcription_start_site | + | 175427 | 175427 | -1285 | 18660 | AN4361 |
| 831  | CONTIG75 | 176405 | 176681 | 2.07 | 1.30E-02 | transcription_start_site | + | 175427 | 175427 | 1116  | 18660 | AN4361 |
| 2421 | CONTIG75 | 175440 | 176314 | 1.23 | 1.79E-01 | transcription_start_site | + | 175427 | 175427 | 450   | 18660 | AN4361 |
| 2421 | CONTIG75 | 175440 | 176314 | 1.23 | 1.79E-01 | transcription_start_site | + | 174673 | 174673 | 1204  | 18659 | AN4361 |
| 831  | CONTIG75 | 176405 | 176681 | 2.07 | 1.30E-02 | transcription_start_site | - | 176334 | 176334 | -209  | 18663 | AN4362 |
| 831  | CONTIG75 | 176405 | 176681 | 2.07 | 1.30E-02 | transcription_start_site | - | 177424 | 177424 | 881   | 18662 | AN4362 |
| 831  | CONTIG75 | 176405 | 176681 | 2.07 | 1.30E-02 | transcription_start_site | - | 177606 | 177606 | 1063  | 18661 | AN4362 |
| 2421 | CONTIG75 | 175440 | 176314 | 1.23 | 1.79E-01 | transcription_start_site | - | 176334 | 176334 | 457   | 18663 | AN4362 |
| 1320 | CONTIG75 | 183232 | 183726 | 1.68 | 5.22E-02 | transcription_start_site | - | 181272 | 181272 | -2207 | 18664 | AN4363 |
| 1320 | CONTIG75 | 183232 | 183726 | 1.68 | 5.22E-02 | transcription_start_site | - | 180935 | 180935 | -2544 | 18665 | AN4363 |
| 1320 | CONTIG75 | 183232 | 183726 | 1.68 | 5.22E-02 | transcription_start_site | - | 183954 | 183954 | 475   | 18667 | AN4364 |
| 1320 | CONTIG75 | 183232 | 183726 | 1.68 | 5.22E-02 | transcription_start_site | - | 184039 | 184039 | 560   | 18666 | AN4364 |
| 1320 | CONTIG75 | 183232 | 183726 | 1.68 | 5.22E-02 | transcription_start_site | + | 184964 | 184964 | -1485 | 18668 | AN4365 |
| 1320 | CONTIG75 | 183232 | 183726 | 1.68 | 5.22E-02 | transcription_start_site | + | 185259 | 185259 | -1780 | 18669 | AN4365 |
| 1629 | CONTIG75 | 210238 | 210502 | 1.53 | 8.01E-02 | transcription_start_site | - | 206634 | 206634 | -3736 | 18681 | AN4368 |
| 1629 | CONTIG75 | 210238 | 210502 | 1.53 | 8.01E-02 | transcription_start_site | - | 206527 | 206527 | -3843 | 18682 | AN4368 |
| 2126 | CONTIG75 | 206783 | 207060 | 1.33 | 1.44E-01 | transcription_start_site | - | 206634 | 206634 | -287  | 18681 | AN4368 |
| 2126 | CONTIG75 | 206783 | 207060 | 1.33 | 1.44E-01 | transcription_start_site | - | 206527 | 206527 | -394  | 18682 | AN4368 |
| 2123 | CONTIG75 | 204168 | 204503 | 1.33 | 1.28E-01 | transcription_start_site | + | 208698 | 208698 | -4362 | 18683 | AN4369 |
| 2126 | CONTIG75 | 206783 | 207060 | 1.33 | 1.44E-01 | transcription_start_site | + | 208698 | 208698 | -1776 | 18683 | AN4369 |
| 2367 | CONTIG76 | 15528  | 16028  | 1.25 | 1.44E-01 | transcription_start_site | - | 10550  | 10550  | -5228 | 18690 | AN4373 |
| 562  | CONTIG76 | 18469  | 19343  | 2.36 | 0.00E+00 | transcription_start_site | - | 14013  | 14013  | -4893 | 18692 | AN4374 |
| 562  | CONTIG76 | 18469  | 19343  | 2.36 | 0.00E+00 | transcription_start_site | - | 13903  | 13903  | -5003 | 18693 | AN4374 |
| 562  | CONTIG76 | 18469  | 19343  | 2.36 | 0.00E+00 | transcription_start_site | - | 13471  | 13471  | -5435 | 18694 | AN4374 |
| 2367 | CONTIG76 | 15528  | 16028  | 1.25 | 1.44E-01 | transcription_start_site | - | 14013  | 14013  | -1765 | 18692 | AN4374 |
| 2367 | CONTIG76 | 15528  | 16028  | 1.25 | 1.44E-01 | transcription_start_site | - | 13903  | 13903  | -1875 | 18693 | AN4374 |
| 2367 | CONTIG76 | 15528  | 16028  | 1.25 | 1.44E-01 | transcription_start_site | - | 13471  | 13471  | -2307 | 18694 | AN4374 |
| 2367 | CONTIG76 | 15528  | 16028  | 1.25 | 1.44E-01 | transcription_start_site | - | 12953  | 12953  | -2825 | 18695 | AN4374 |
| 562  | CONTIG76 | 18469  | 19343  | 2.36 | 0.00E+00 | transcription_start_site | - | 17469  | 17469  | -1437 | 18696 | AN4375 |
| 562  | CONTIG76 | 18469  | 19343  | 2.36 | 0.00E+00 | transcription_start_site | - | 17320  | 17320  | -1586 | 18697 | AN4375 |
| 674  | CONTIG76 | 20569  | 20913  | 2.22 | 4.61E-03 | transcription_start_site | - | 17469  | 17469  | -3272 | 18696 | AN4375 |
| 674  | CONTIG76 | 20569  | 20913  | 2.22 | 4.61E-03 | transcription_start_site | - | 17320  | 17320  | -3421 | 18697 | AN4375 |
| 1757 | CONTIG76 | 19589  | 20233  | 1.48 | 6.84E-02 | transcription_start_site | - | 17469  | 17469  | -2442 | 18696 | AN4375 |
| 1757 | CONTIG76 | 19589  | 20233  | 1.48 | 6.84E-02 | transcription_start_site | - | 17320  | 17320  | -2591 | 18697 | AN4375 |
| 82   | CONTIG76 | 22894  | 23153  | 3.29 | 0.00E+00 | transcription_start_site | + | 23350  | 23350  | -326  | 18698 | AN4376 |
| 82   | CONTIG76 | 22894  | 23153  | 3.29 | 0.00E+00 | transcription_start_site | + | 23449  | 23449  | -425  | 18699 | AN4376 |
| 82   | CONTIG76 | 22894  | 23153  | 3.29 | 0.00E+00 | transcription_start_site | + | 23778  | 23778  | -754  | 18700 | AN4376 |
| 562  | CONTIG76 | 18469  | 19343  | 2.36 | 0.00E+00 | transcription_start_site | + | 23350  | 23350  | -4444 | 18698 | AN4376 |
| 562  | CONTIG76 | 18469  | 19343  | 2.36 | 0.00E+00 | transcription_start_site | + | 23449  | 23449  | -4543 | 18699 | AN4376 |
| 562  | CONTIG76 | 18469  | 19343  | 2.36 | 0.00E+00 | transcription_start_site | + | 23778  | 23778  | -4872 | 18700 | AN4376 |
| 674  | CONTIG76 | 20569  | 20913  | 2.22 | 4.61E-03 | transcription_start_site | + | 23350  | 23350  | -2609 | 18698 | AN4376 |

|               |       |       |      |          |                          |   |       |       |       |       |        |
|---------------|-------|-------|------|----------|--------------------------|---|-------|-------|-------|-------|--------|
| 674 CONTIG76  | 20569 | 20913 | 2.22 | 4.61E-03 | transcription_start_site | + | 23449 | 23449 | -2708 | 18699 | AN4376 |
| 674 CONTIG76  | 20569 | 20913 | 2.22 | 4.61E-03 | transcription_start_site | + | 23778 | 23778 | -3037 | 18700 | AN4376 |
| 1510 CONTIG76 | 24019 | 24588 | 1.58 | 5.22E-02 | transcription_start_site | + | 23778 | 23778 | 525   | 18700 | AN4376 |
| 1510 CONTIG76 | 24019 | 24588 | 1.58 | 5.22E-02 | transcription_start_site | + | 23449 | 23449 | 854   | 18699 | AN4376 |
| 1510 CONTIG76 | 24019 | 24588 | 1.58 | 5.22E-02 | transcription_start_site | + | 23350 | 23350 | 953   | 18698 | AN4376 |
| 1757 CONTIG76 | 19589 | 20233 | 1.48 | 6.84E-02 | transcription_start_site | + | 23350 | 23350 | -3439 | 18698 | AN4376 |
| 1757 CONTIG76 | 19589 | 20233 | 1.48 | 6.84E-02 | transcription_start_site | + | 23449 | 23449 | -3538 | 18699 | AN4376 |
| 1757 CONTIG76 | 19589 | 20233 | 1.48 | 6.84E-02 | transcription_start_site | + | 23778 | 23778 | -3867 | 18700 | AN4376 |
| 82 CONTIG76   | 22894 | 23153 | 3.29 | 0.00E+00 | transcription_start_site | + | 25586 | 25586 | -2562 | 18701 | AN4377 |
| 82 CONTIG76   | 22894 | 23153 | 3.29 | 0.00E+00 | transcription_start_site | + | 26045 | 26045 | -3021 | 18702 | AN4377 |
| 82 CONTIG76   | 22894 | 23153 | 3.29 | 0.00E+00 | transcription_start_site | + | 26336 | 26336 | -3312 | 18703 | AN4377 |
| 82 CONTIG76   | 22894 | 23153 | 3.29 | 0.00E+00 | transcription_start_site | + | 26445 | 26445 | -3421 | 18704 | AN4377 |
| 82 CONTIG76   | 22894 | 23153 | 3.29 | 0.00E+00 | transcription_start_site | + | 26996 | 26996 | -3972 | 18705 | AN4377 |
| 82 CONTIG76   | 22894 | 23153 | 3.29 | 0.00E+00 | transcription_start_site | + | 27577 | 27577 | -4553 | 18706 | AN4377 |
| 674 CONTIG76  | 20569 | 20913 | 2.22 | 4.61E-03 | transcription_start_site | + | 25586 | 25586 | -4845 | 18701 | AN4377 |
| 1510 CONTIG76 | 24019 | 24588 | 1.58 | 5.22E-02 | transcription_start_site | + | 25586 | 25586 | -1282 | 18701 | AN4377 |
| 1510 CONTIG76 | 24019 | 24588 | 1.58 | 5.22E-02 | transcription_start_site | + | 26045 | 26045 | -1741 | 18702 | AN4377 |
| 1510 CONTIG76 | 24019 | 24588 | 1.58 | 5.22E-02 | transcription_start_site | + | 26336 | 26336 | -2032 | 18703 | AN4377 |
| 1510 CONTIG76 | 24019 | 24588 | 1.58 | 5.22E-02 | transcription_start_site | + | 26445 | 26445 | -2141 | 18704 | AN4377 |
| 1510 CONTIG76 | 24019 | 24588 | 1.58 | 5.22E-02 | transcription_start_site | + | 26996 | 26996 | -2692 | 18705 | AN4377 |
| 1510 CONTIG76 | 24019 | 24588 | 1.58 | 5.22E-02 | transcription_start_site | + | 27577 | 27577 | -3273 | 18706 | AN4377 |
| 860 CONTIG76  | 33389 | 35548 | 2.04 | 0.00E+00 | transcription_start_site | - | 33154 | 33154 | -1314 | 18707 | AN4378 |
| 860 CONTIG76  | 33389 | 35548 | 2.04 | 0.00E+00 | transcription_start_site | - | 32949 | 32949 | -1519 | 18708 | AN4378 |
| 860 CONTIG76  | 33389 | 35548 | 2.04 | 0.00E+00 | transcription_start_site | - | 32730 | 32730 | -1738 | 18709 | AN4378 |
| 860 CONTIG76  | 33389 | 35548 | 2.04 | 0.00E+00 | transcription_start_site | - | 32234 | 32234 | -2234 | 18710 | AN4378 |
| 860 CONTIG76  | 33389 | 35548 | 2.04 | 0.00E+00 | transcription_start_site | - | 35035 | 35035 | 566   | 18711 | AN4379 |
| 718 CONTIG76  | 63613 | 63952 | 2.18 | 5.20E-03 | transcription_start_site | - | 61734 | 61734 | -2048 | 18743 | AN4389 |
| 718 CONTIG76  | 63613 | 63952 | 2.18 | 5.20E-03 | transcription_start_site | - | 60602 | 60602 | -3180 | 18744 | AN4389 |
| 718 CONTIG76  | 63613 | 63952 | 2.18 | 5.20E-03 | transcription_start_site | - | 60541 | 60541 | -3241 | 18745 | AN4389 |
| 718 CONTIG76  | 63613 | 63952 | 2.18 | 5.20E-03 | transcription_start_site | - | 60422 | 60422 | -3360 | 18746 | AN4389 |
| 718 CONTIG76  | 63613 | 63952 | 2.18 | 5.20E-03 | transcription_start_site | + | 65116 | 65116 | -1333 | 18747 | AN4390 |
| 718 CONTIG76  | 63613 | 63952 | 2.18 | 5.20E-03 | transcription_start_site | + | 65239 | 65239 | -1456 | 18748 | AN4390 |
| 718 CONTIG76  | 63613 | 63952 | 2.18 | 5.20E-03 | transcription_start_site | + | 67144 | 67144 | -3361 | 18749 | AN4391 |
| 2083 CONTIG76 | 80565 | 80839 | 1.34 | 1.08E-01 | transcription_start_site | + | 79772 | 79772 | 930   | 18764 | AN4395 |
| 2083 CONTIG76 | 80565 | 80839 | 1.34 | 1.08E-01 | transcription_start_site | + | 80916 | 80916 | -214  | 18765 | AN4396 |
| 2083 CONTIG76 | 80565 | 80839 | 1.34 | 1.08E-01 | transcription_start_site | + | 81052 | 81052 | -350  | 18766 | AN4396 |
| 2083 CONTIG76 | 80565 | 80839 | 1.34 | 1.08E-01 | transcription_start_site | + | 81227 | 81227 | -525  | 18767 | AN4396 |
| 2083 CONTIG76 | 80565 | 80839 | 1.34 | 1.08E-01 | transcription_start_site | + | 81487 | 81487 | -785  | 18768 | AN4396 |
| 2083 CONTIG76 | 80565 | 80839 | 1.34 | 1.08E-01 | transcription_start_site | - | 81718 | 81718 | 1016  | 18772 | AN4397 |
| 2083 CONTIG76 | 80565 | 80839 | 1.34 | 1.08E-01 | transcription_start_site | + | 83692 | 83692 | -2990 | 18773 | AN4398 |
| 2083 CONTIG76 | 80565 | 80839 | 1.34 | 1.08E-01 | transcription_start_site | + | 83940 | 83940 | -3238 | 18774 | AN4398 |
| 2083 CONTIG76 | 80565 | 80839 | 1.34 | 1.08E-01 | transcription_start_site | + | 84404 | 84404 | -3702 | 18775 | AN4398 |
| 2083 CONTIG76 | 80565 | 80839 | 1.34 | 1.08E-01 | transcription_start_site | + | 85242 | 85242 | -4540 | 18776 | AN4398 |
| 2083 CONTIG76 | 80565 | 80839 | 1.34 | 1.08E-01 | transcription_start_site | + | 85406 | 85406 | -4704 | 18777 | AN4398 |
| 1951 CONTIG76 | 91517 | 91801 | 1.39 | 9.24E-02 | transcription_start_site | - | 88510 | 88510 | -3149 | 18782 | AN4400 |
| 1951 CONTIG76 | 91517 | 91801 | 1.39 | 9.24E-02 | transcription_start_site | - | 88295 | 88295 | -3364 | 18783 | AN4400 |
| 1951 CONTIG76 | 91517 | 91801 | 1.39 | 9.24E-02 | transcription_start_site | - | 88165 | 88165 | -3494 | 18784 | AN4400 |
| 1951 CONTIG76 | 91517 | 91801 | 1.39 | 9.24E-02 | transcription_start_site | + | 91065 | 91065 | 594   | 18793 | AN4401 |
| 1951 CONTIG76 | 91517 | 91801 | 1.39 | 9.24E-02 | transcription_start_site | + | 90901 | 90901 | 758   | 18792 | AN4401 |
| 1951 CONTIG76 | 91517 | 91801 | 1.39 | 9.24E-02 | transcription_start_site | + | 91820 | 91820 | -161  | 18794 | AN4402 |
| 1951 CONTIG76 | 91517 | 91801 | 1.39 | 9.24E-02 | transcription_start_site | + | 91971 | 91971 | -312  | 18795 | AN4402 |
| 1951 CONTIG76 | 91517 | 91801 | 1.39 | 9.24E-02 | transcription_start_site | + | 92080 | 92080 | -421  | 18796 | AN4402 |
| 1951 CONTIG76 | 91517 | 91801 | 1.39 | 9.24E-02 | transcription_start_site | + | 92231 | 92231 | -572  | 18797 | AN4402 |
| 1951 CONTIG76 | 91517 | 91801 | 1.39 | 9.24E-02 | transcription_start_site | + | 92424 | 92424 | -765  | 18798 | AN4402 |
| 1951 CONTIG76 | 91517 | 91801 | 1.39 | 9.24E-02 | transcription_start_site | + | 92990 | 92990 | -1331 | 18799 | AN4402 |
| 1951 CONTIG76 | 91517 | 91801 | 1.39 | 9.24E-02 | transcription_start_site | + | 95152 | 95152 | -3493 | 18803 | AN4404 |
| 1951 CONTIG76 | 91517 | 91801 | 1.39 | 9.24E-02 | transcription_start_site | + | 95248 | 95248 | -3589 | 18804 | AN4404 |

|               |        |        |      |          |                          |   |        |        |       |       |        |
|---------------|--------|--------|------|----------|--------------------------|---|--------|--------|-------|-------|--------|
| 1951 CONTIG76 | 91517  | 91801  | 1.39 | 9.24E-02 | transcription_start_site | + | 95457  | 95457  | -3798 | 18805 | AN4404 |
| 1951 CONTIG76 | 91517  | 91801  | 1.39 | 9.24E-02 | transcription_start_site | + | 96095  | 96095  | -4436 | 18806 | AN4404 |
| 1951 CONTIG76 | 91517  | 91801  | 1.39 | 9.24E-02 | transcription_start_site | + | 96417  | 96417  | -4758 | 18807 | AN4404 |
| 1951 CONTIG76 | 91517  | 91801  | 1.39 | 9.24E-02 | transcription_start_site | + | 96628  | 96628  | -4969 | 18808 | AN4404 |
| 1951 CONTIG76 | 91517  | 91801  | 1.39 | 9.24E-02 | transcription_start_site | + | 96765  | 96765  | -5106 | 18809 | AN4404 |
| 2200 CONTIG76 | 100803 | 101101 | 1.3  | 1.25E-01 | transcription_start_site | - | 100615 | 100615 | -337  | 18813 | AN4406 |
| 2200 CONTIG76 | 100803 | 101101 | 1.3  | 1.25E-01 | transcription_start_site | - | 100514 | 100514 | -438  | 18814 | AN4406 |
| 2200 CONTIG76 | 100803 | 101101 | 1.3  | 1.25E-01 | transcription_start_site | - | 100381 | 100381 | -571  | 18815 | AN4406 |
| 2200 CONTIG76 | 100803 | 101101 | 1.3  | 1.25E-01 | transcription_start_site | - | 100304 | 100304 | -648  | 18816 | AN4406 |
| 2200 CONTIG76 | 100803 | 101101 | 1.3  | 1.25E-01 | transcription_start_site | - | 100188 | 100188 | -764  | 18817 | AN4406 |
| 2200 CONTIG76 | 100803 | 101101 | 1.3  | 1.25E-01 | transcription_start_site | - | 100024 | 100024 | -928  | 18818 | AN4406 |
| 2200 CONTIG76 | 100803 | 101101 | 1.3  | 1.25E-01 | transcription_start_site | - | 99853  | 99853  | -1099 | 18819 | AN4406 |
| 2200 CONTIG76 | 100803 | 101101 | 1.3  | 1.25E-01 | transcription_start_site | - | 98991  | 98991  | -1961 | 18820 | AN4406 |
| 2200 CONTIG76 | 100803 | 101101 | 1.3  | 1.25E-01 | transcription_start_site | + | 103434 | 103434 | -2482 | 18821 | AN4407 |
| 2200 CONTIG76 | 100803 | 101101 | 1.3  | 1.25E-01 | transcription_start_site | + | 103779 | 103779 | -2827 | 18822 | AN4407 |
| 2200 CONTIG76 | 100803 | 101101 | 1.3  | 1.25E-01 | transcription_start_site | + | 103930 | 103930 | -2978 | 18823 | AN4407 |
| 2200 CONTIG76 | 100803 | 101101 | 1.3  | 1.25E-01 | transcription_start_site | + | 104161 | 104161 | -3209 | 18824 | AN4407 |
| 2200 CONTIG76 | 100803 | 101101 | 1.3  | 1.25E-01 | transcription_start_site | + | 104386 | 104386 | -3434 | 18825 | AN4407 |
| 959 CONTIG76  | 109054 | 109853 | 1.95 | 1.30E-02 | transcription_start_site | - | 108902 | 108902 | -551  | 18826 | AN4408 |
| 959 CONTIG76  | 109054 | 109853 | 1.95 | 1.30E-02 | transcription_start_site | - | 108055 | 108055 | -1398 | 18827 | AN4408 |
| 959 CONTIG76  | 109054 | 109853 | 1.95 | 1.30E-02 | transcription_start_site | - | 107051 | 107051 | -2402 | 18828 | AN4408 |
| 959 CONTIG76  | 109054 | 109853 | 1.95 | 1.30E-02 | transcription_start_site | - | 106318 | 106318 | -3135 | 18829 | AN4408 |
| 959 CONTIG76  | 109054 | 109853 | 1.95 | 1.30E-02 | transcription_start_site | + | 109243 | 109243 | 210   | 18830 | AN4409 |
| 959 CONTIG76  | 109054 | 109853 | 1.95 | 1.30E-02 | transcription_start_site | + | 111323 | 111323 | -1869 | 18831 | AN4410 |
| 1758 CONTIG76 | 129392 | 129736 | 1.48 | 6.84E-02 | transcription_start_site | - | 125276 | 125276 | -4288 | 18839 | AN4414 |
| 1758 CONTIG76 | 129392 | 129736 | 1.48 | 6.84E-02 | transcription_start_site | - | 125152 | 125152 | -4412 | 18840 | AN4414 |
| 1758 CONTIG76 | 129392 | 129736 | 1.48 | 6.84E-02 | transcription_start_site | - | 127622 | 127622 | -1942 | 18842 | AN4416 |
| 1758 CONTIG76 | 129392 | 129736 | 1.48 | 6.84E-02 | transcription_start_site | - | 127259 | 127259 | -2305 | 18843 | AN4416 |
| 1758 CONTIG76 | 129392 | 129736 | 1.48 | 6.84E-02 | transcription_start_site | + | 128535 | 128535 | 1029  | 18846 | AN4417 |
| 1011 CONTIG76 | 136208 | 136643 | 1.9  | 1.57E-02 | transcription_start_site | - | 133098 | 133098 | -3327 | 18847 | AN4418 |
| 1011 CONTIG76 | 136208 | 136643 | 1.9  | 1.57E-02 | transcription_start_site | - | 132659 | 132659 | -3766 | 18848 | AN4418 |
| 1011 CONTIG76 | 136208 | 136643 | 1.9  | 1.57E-02 | transcription_start_site | - | 131453 | 131453 | -4972 | 18849 | AN4418 |
| 1072 CONTIG76 | 134185 | 135442 | 1.85 | 1.00E-02 | transcription_start_site | - | 133098 | 133098 | -1715 | 18847 | AN4418 |
| 1072 CONTIG76 | 134185 | 135442 | 1.85 | 1.00E-02 | transcription_start_site | - | 132659 | 132659 | -2154 | 18848 | AN4418 |
| 1072 CONTIG76 | 134185 | 135442 | 1.85 | 1.00E-02 | transcription_start_site | - | 131453 | 131453 | -3360 | 18849 | AN4418 |
| 1952 CONTIG76 | 135463 | 136117 | 1.39 | 9.24E-02 | transcription_start_site | - | 133098 | 133098 | -2692 | 18847 | AN4418 |
| 1952 CONTIG76 | 135463 | 136117 | 1.39 | 9.24E-02 | transcription_start_site | - | 132659 | 132659 | -3131 | 18848 | AN4418 |
| 1952 CONTIG76 | 135463 | 136117 | 1.39 | 9.24E-02 | transcription_start_site | - | 131453 | 131453 | -4337 | 18849 | AN4418 |
| 2084 CONTIG76 | 137859 | 138138 | 1.34 | 1.08E-01 | transcription_start_site | - | 133098 | 133098 | -4900 | 18847 | AN4418 |
| 960 CONTIG76  | 140404 | 140678 | 1.95 | 1.30E-02 | transcription_start_site | + | 139584 | 139584 | 957   | 18854 | AN4419 |
| 1011 CONTIG76 | 136208 | 136643 | 1.9  | 1.57E-02 | transcription_start_site | + | 138291 | 138291 | -1865 | 18850 | AN4419 |
| 1011 CONTIG76 | 136208 | 136643 | 1.9  | 1.57E-02 | transcription_start_site | + | 138396 | 138396 | -1970 | 18851 | AN4419 |
| 1011 CONTIG76 | 136208 | 136643 | 1.9  | 1.57E-02 | transcription_start_site | + | 138696 | 138696 | -2270 | 18852 | AN4419 |
| 1011 CONTIG76 | 136208 | 136643 | 1.9  | 1.57E-02 | transcription_start_site | + | 139113 | 139113 | -2687 | 18853 | AN4419 |
| 1011 CONTIG76 | 136208 | 136643 | 1.9  | 1.57E-02 | transcription_start_site | + | 139584 | 139584 | -3158 | 18854 | AN4419 |
| 1072 CONTIG76 | 134185 | 135442 | 1.85 | 1.00E-02 | transcription_start_site | + | 138291 | 138291 | -3477 | 18850 | AN4419 |
| 1072 CONTIG76 | 134185 | 135442 | 1.85 | 1.00E-02 | transcription_start_site | + | 138396 | 138396 | -3582 | 18851 | AN4419 |
| 1072 CONTIG76 | 134185 | 135442 | 1.85 | 1.00E-02 | transcription_start_site | + | 138696 | 138696 | -3882 | 18852 | AN4419 |
| 1072 CONTIG76 | 134185 | 135442 | 1.85 | 1.00E-02 | transcription_start_site | + | 139113 | 139113 | -4299 | 18853 | AN4419 |
| 1072 CONTIG76 | 134185 | 135442 | 1.85 | 1.00E-02 | transcription_start_site | + | 139584 | 139584 | -4770 | 18854 | AN4419 |
| 1952 CONTIG76 | 135463 | 136117 | 1.39 | 9.24E-02 | transcription_start_site | + | 138291 | 138291 | -2501 | 18850 | AN4419 |
| 1952 CONTIG76 | 135463 | 136117 | 1.39 | 9.24E-02 | transcription_start_site | + | 138396 | 138396 | -2606 | 18851 | AN4419 |
| 1952 CONTIG76 | 135463 | 136117 | 1.39 | 9.24E-02 | transcription_start_site | + | 138696 | 138696 | -2906 | 18852 | AN4419 |
| 1952 CONTIG76 | 135463 | 136117 | 1.39 | 9.24E-02 | transcription_start_site | + | 139113 | 139113 | -3323 | 18853 | AN4419 |
| 1952 CONTIG76 | 135463 | 136117 | 1.39 | 9.24E-02 | transcription_start_site | + | 139584 | 139584 | -3794 | 18854 | AN4419 |
| 2084 CONTIG76 | 137859 | 138138 | 1.34 | 1.08E-01 | transcription_start_site | + | 138291 | 138291 | -292  | 18850 | AN4419 |
| 2084 CONTIG76 | 137859 | 138138 | 1.34 | 1.08E-01 | transcription_start_site | + | 138396 | 138396 | -397  | 18851 | AN4419 |

|      |          |        |        |      |          |                          |   |        |        |       |       |        |
|------|----------|--------|--------|------|----------|--------------------------|---|--------|--------|-------|-------|--------|
| 2084 | CONTIG76 | 137859 | 138138 | 1.34 | 1.08E-01 | transcription_start_site | + | 138696 | 138696 | -697  | 18852 | AN4419 |
| 2084 | CONTIG76 | 137859 | 138138 | 1.34 | 1.08E-01 | transcription_start_site | + | 139113 | 139113 | -1114 | 18853 | AN4419 |
| 2084 | CONTIG76 | 137859 | 138138 | 1.34 | 1.08E-01 | transcription_start_site | + | 139584 | 139584 | -1585 | 18854 | AN4419 |
| 1943 | CONTIG76 | 147019 | 147653 | 1.39 | 7.51E-02 | transcription_start_site | + | 147272 | 147272 | 64    | 18856 | AN4421 |
| 1943 | CONTIG76 | 147019 | 147653 | 1.39 | 7.51E-02 | transcription_start_site | + | 147474 | 147474 | -138  | 18857 | AN4421 |
| 1943 | CONTIG76 | 147019 | 147653 | 1.39 | 7.51E-02 | transcription_start_site | + | 147077 | 147077 | 259   | 18855 | AN4421 |
| 1943 | CONTIG76 | 147019 | 147653 | 1.39 | 7.51E-02 | transcription_start_site | + | 148631 | 148631 | -1295 | 18858 | AN4421 |
| 1746 | CONTIG76 | 150839 | 151253 | 1.48 | 4.42E-02 | transcription_start_site | - | 150357 | 150357 | -689  | 18859 | AN4422 |
| 1379 | CONTIG77 | 11     | 280    | 1.64 | 1.84E-02 | transcription_start_site | + | 4451   | 4451   | -4305 | 18867 | AN4425 |
| 1379 | CONTIG77 | 11     | 280    | 1.64 | 1.84E-02 | transcription_start_site | + | 4532   | 4532   | -4386 | 18868 | AN4425 |
| 1379 | CONTIG77 | 11     | 280    | 1.64 | 1.84E-02 | transcription_start_site | + | 4803   | 4803   | -4657 | 18869 | AN4425 |
| 2633 | CONTIG77 | 17260  | 17609  | 1.15 | 1.25E-01 | transcription_start_site | - | 17701  | 17701  | 266   | 18891 | AN4430 |
| 2633 | CONTIG77 | 17260  | 17609  | 1.15 | 1.25E-01 | transcription_start_site | - | 16839  | 16839  | -595  | 18892 | AN4430 |
| 2633 | CONTIG77 | 17260  | 17609  | 1.15 | 1.25E-01 | transcription_start_site | + | 18240  | 18240  | -805  | 18893 | AN4431 |
| 2633 | CONTIG77 | 17260  | 17609  | 1.15 | 1.25E-01 | transcription_start_site | + | 18504  | 18504  | -1069 | 18894 | AN4431 |
| 2633 | CONTIG77 | 17260  | 17609  | 1.15 | 1.25E-01 | transcription_start_site | + | 18651  | 18651  | -1216 | 18895 | AN4431 |
| 2633 | CONTIG77 | 17260  | 17609  | 1.15 | 1.25E-01 | transcription_start_site | + | 18957  | 18957  | -1522 | 18896 | AN4431 |
| 2633 | CONTIG77 | 17260  | 17609  | 1.15 | 1.25E-01 | transcription_start_site | + | 19054  | 19054  | -1619 | 18897 | AN4431 |
| 2633 | CONTIG77 | 17260  | 17609  | 1.15 | 1.25E-01 | transcription_start_site | + | 19166  | 19166  | -1731 | 18898 | AN4431 |
| 2633 | CONTIG77 | 17260  | 17609  | 1.15 | 1.25E-01 | transcription_start_site | + | 19381  | 19381  | -1946 | 18899 | AN4431 |
| 2633 | CONTIG77 | 17260  | 17609  | 1.15 | 1.25E-01 | transcription_start_site | + | 19637  | 19637  | -2202 | 18900 | AN4431 |
| 2633 | CONTIG77 | 17260  | 17609  | 1.15 | 1.25E-01 | transcription_start_site | + | 20196  | 20196  | -2761 | 18901 | AN4431 |
| 1305 | CONTIG77 | 44041  | 44402  | 1.69 | 1.57E-02 | transcription_start_site | - | 43049  | 43049  | -1172 | 18919 | AN4438 |
| 1305 | CONTIG77 | 44041  | 44402  | 1.69 | 1.57E-02 | transcription_start_site | - | 41861  | 41861  | -2360 | 18920 | AN4438 |
| 1305 | CONTIG77 | 44041  | 44402  | 1.69 | 1.57E-02 | transcription_start_site | - | 41592  | 41592  | -2629 | 18921 | AN4438 |
| 2281 | CONTIG77 | 41326  | 41924  | 1.27 | 6.16E-02 | transcription_start_site | - | 41592  | 41592  | -33   | 18921 | AN4438 |
| 2281 | CONTIG77 | 41326  | 41924  | 1.27 | 6.16E-02 | transcription_start_site | - | 41861  | 41861  | 236   | 18920 | AN4438 |
| 2727 | CONTIG77 | 46881  | 47245  | 1.11 | 1.44E-01 | transcription_start_site | - | 43049  | 43049  | -4014 | 18919 | AN4438 |
| 1305 | CONTIG77 | 44041  | 44402  | 1.69 | 1.57E-02 | transcription_start_site | + | 44534  | 44534  | -312  | 18922 | AN4439 |
| 2281 | CONTIG77 | 41326  | 41924  | 1.27 | 6.16E-02 | transcription_start_site | + | 44534  | 44534  | -2909 | 18922 | AN4439 |
| 2727 | CONTIG77 | 46881  | 47245  | 1.11 | 1.44E-01 | transcription_start_site | - | 46072  | 46072  | -991  | 18923 | AN4440 |
| 2727 | CONTIG77 | 46881  | 47245  | 1.11 | 1.44E-01 | transcription_start_site | - | 45896  | 45896  | -1167 | 18924 | AN4440 |
| 1305 | CONTIG77 | 44041  | 44402  | 1.69 | 1.57E-02 | transcription_start_site | + | 46473  | 46473  | -2251 | 18925 | AN4441 |
| 1305 | CONTIG77 | 44041  | 44402  | 1.69 | 1.57E-02 | transcription_start_site | + | 46808  | 46808  | -2586 | 18926 | AN4441 |
| 1305 | CONTIG77 | 44041  | 44402  | 1.69 | 1.57E-02 | transcription_start_site | + | 47106  | 47106  | -2884 | 18927 | AN4441 |
| 2281 | CONTIG77 | 41326  | 41924  | 1.27 | 6.16E-02 | transcription_start_site | + | 46473  | 46473  | -4848 | 18925 | AN4441 |
| 2281 | CONTIG77 | 41326  | 41924  | 1.27 | 6.16E-02 | transcription_start_site | + | 46808  | 46808  | -5183 | 18926 | AN4441 |
| 2727 | CONTIG77 | 46881  | 47245  | 1.11 | 1.44E-01 | transcription_start_site | + | 47106  | 47106  | -43   | 18927 | AN4441 |
| 2727 | CONTIG77 | 46881  | 47245  | 1.11 | 1.44E-01 | transcription_start_site | + | 46808  | 46808  | 255   | 18926 | AN4441 |
| 2727 | CONTIG77 | 46881  | 47245  | 1.11 | 1.44E-01 | transcription_start_site | + | 46473  | 46473  | 590   | 18925 | AN4441 |
| 797  | CONTIG77 | 56565  | 56919  | 2.1  | 0.00E+00 | transcription_start_site | - | 56353  | 56353  | -389  | 18928 | AN4443 |
| 797  | CONTIG77 | 56565  | 56919  | 2.1  | 0.00E+00 | transcription_start_site | - | 56277  | 56277  | -465  | 18929 | AN4443 |
| 1243 | CONTIG77 | 60840  | 61114  | 1.73 | 1.30E-02 | transcription_start_site | - | 56353  | 56353  | -4624 | 18928 | AN4443 |
| 1243 | CONTIG77 | 60840  | 61114  | 1.73 | 1.30E-02 | transcription_start_site | - | 56277  | 56277  | -4700 | 18929 | AN4443 |
| 797  | CONTIG77 | 56565  | 56919  | 2.1  | 0.00E+00 | transcription_start_site | + | 58394  | 58394  | -1652 | 18930 | AN4444 |
| 797  | CONTIG77 | 56565  | 56919  | 2.1  | 0.00E+00 | transcription_start_site | + | 58458  | 58458  | -1716 | 18931 | AN4444 |
| 1243 | CONTIG77 | 60840  | 61114  | 1.73 | 1.30E-02 | transcription_start_site | - | 61763  | 61763  | 786   | 18934 | AN4445 |
| 1243 | CONTIG77 | 60840  | 61114  | 1.73 | 1.30E-02 | transcription_start_site | - | 61957  | 61957  | 980   | 18933 | AN4445 |
| 1243 | CONTIG77 | 60840  | 61114  | 1.73 | 1.30E-02 | transcription_start_site | - | 62098  | 62098  | 1121  | 18932 | AN4445 |
| 2134 | CONTIG77 | 65410  | 65694  | 1.32 | 6.84E-02 | transcription_start_site | - | 62098  | 62098  | -3454 | 18932 | AN4445 |
| 2134 | CONTIG77 | 65410  | 65694  | 1.32 | 6.84E-02 | transcription_start_site | - | 61957  | 61957  | -3595 | 18933 | AN4445 |
| 2134 | CONTIG77 | 65410  | 65694  | 1.32 | 6.84E-02 | transcription_start_site | - | 61763  | 61763  | -3789 | 18934 | AN4445 |
| 1243 | CONTIG77 | 60840  | 61114  | 1.73 | 1.30E-02 | transcription_start_site | + | 62366  | 62366  | -1389 | 18935 | AN4446 |
| 1243 | CONTIG77 | 60840  | 61114  | 1.73 | 1.30E-02 | transcription_start_site | + | 62583  | 62583  | -1606 | 18936 | AN4446 |
| 1243 | CONTIG77 | 60840  | 61114  | 1.73 | 1.30E-02 | transcription_start_site | + | 63061  | 63061  | -2084 | 18937 | AN4446 |
| 406  | CONTIG77 | 68260  | 68529  | 2.59 | 0.00E+00 | transcription_start_site | - | 67554  | 67554  | -840  | 18938 | AN4447 |
| 406  | CONTIG77 | 68260  | 68529  | 2.59 | 0.00E+00 | transcription_start_site | - | 66556  | 66556  | -1838 | 18939 | AN4447 |

|      |          |        |        |      |          |                          |   |        |        |       |       |        |
|------|----------|--------|--------|------|----------|--------------------------|---|--------|--------|-------|-------|--------|
| 2134 | CONTIG77 | 65410  | 65694  | 1.32 | 6.84E-02 | transcription_start_site | - | 66556  | 66556  | 1004  | 18939 | AN4447 |
| 406  | CONTIG77 | 68260  | 68529  | 2.59 | 0.00E+00 | transcription_start_site | - | 68297  | 68297  | -97   | 18942 | AN4448 |
| 406  | CONTIG77 | 68260  | 68529  | 2.59 | 0.00E+00 | transcription_start_site | - | 68663  | 68663  | 268   | 18941 | AN4448 |
| 406  | CONTIG77 | 68260  | 68529  | 2.59 | 0.00E+00 | transcription_start_site | - | 68054  | 68054  | -340  | 18943 | AN4448 |
| 406  | CONTIG77 | 68260  | 68529  | 2.59 | 0.00E+00 | transcription_start_site | - | 68983  | 68983  | 588   | 18940 | AN4448 |
| 406  | CONTIG77 | 68260  | 68529  | 2.59 | 0.00E+00 | transcription_start_site | - | 69416  | 69416  | 1021  | 18945 | AN4449 |
| 406  | CONTIG77 | 68260  | 68529  | 2.59 | 0.00E+00 | transcription_start_site | + | 70452  | 70452  | -2057 | 18946 | AN4450 |
| 406  | CONTIG77 | 68260  | 68529  | 2.59 | 0.00E+00 | transcription_start_site | + | 70647  | 70647  | -2252 | 18947 | AN4450 |
| 2134 | CONTIG77 | 65410  | 65694  | 1.32 | 6.84E-02 | transcription_start_site | + | 70452  | 70452  | -4900 | 18946 | AN4450 |
| 2134 | CONTIG77 | 65410  | 65694  | 1.32 | 6.84E-02 | transcription_start_site | + | 70647  | 70647  | -5095 | 18947 | AN4450 |
| 714  | CONTIG77 | 93462  | 93741  | 2.18 | 1.54E-03 | transcription_start_site | - | 90715  | 90715  | -2886 | 18970 | AN4456 |
| 714  | CONTIG77 | 93462  | 93741  | 2.18 | 1.54E-03 | transcription_start_site | - | 90292  | 90292  | -3309 | 18971 | AN4456 |
| 714  | CONTIG77 | 93462  | 93741  | 2.18 | 1.54E-03 | transcription_start_site | + | 92958  | 92958  | 643   | 18977 | AN4458 |
| 2407 | CONTIG77 | 99752  | 100041 | 1.23 | 9.24E-02 | transcription_start_site | - | 96623  | 96623  | -3273 | 18978 | AN4459 |
| 2407 | CONTIG77 | 99752  | 100041 | 1.23 | 9.24E-02 | transcription_start_site | - | 96351  | 96351  | -3545 | 18979 | AN4459 |
| 2407 | CONTIG77 | 99752  | 100041 | 1.23 | 9.24E-02 | transcription_start_site | - | 96116  | 96116  | -3780 | 18980 | AN4459 |
| 714  | CONTIG77 | 93462  | 93741  | 2.18 | 1.54E-03 | transcription_start_site | + | 97476  | 97476  | -3874 | 18981 | AN4460 |
| 714  | CONTIG77 | 93462  | 93741  | 2.18 | 1.54E-03 | transcription_start_site | + | 97703  | 97703  | -4101 | 18982 | AN4460 |
| 714  | CONTIG77 | 93462  | 93741  | 2.18 | 1.54E-03 | transcription_start_site | + | 97787  | 97787  | -4185 | 18983 | AN4460 |
| 2729 | CONTIG77 | 106746 | 107013 | 1.11 | 1.44E-01 | transcription_start_site | - | 102438 | 102438 | -4441 | 18984 | AN4461 |
| 2794 | CONTIG77 | 101717 | 101991 | 1.07 | 1.66E-01 | transcription_start_site | - | 102438 | 102438 | 584   | 18984 | AN4461 |
| 1917 | CONTIG77 | 107857 | 108131 | 1.4  | 5.22E-02 | transcription_start_site | - | 106846 | 106846 | -1148 | 18985 | AN4462 |
| 1917 | CONTIG77 | 107857 | 108131 | 1.4  | 5.22E-02 | transcription_start_site | - | 103309 | 103309 | -4685 | 18986 | AN4462 |
| 2729 | CONTIG77 | 106746 | 107013 | 1.11 | 1.44E-01 | transcription_start_site | - | 106846 | 106846 | -33   | 18985 | AN4462 |
| 2729 | CONTIG77 | 106746 | 107013 | 1.11 | 1.44E-01 | transcription_start_site | - | 103309 | 103309 | -3570 | 18986 | AN4462 |
| 1917 | CONTIG77 | 107857 | 108131 | 1.4  | 5.22E-02 | transcription_start_site | - | 108813 | 108813 | 819   | 18992 | AN4463 |
| 2795 | CONTIG77 | 118953 | 119302 | 1.07 | 1.66E-01 | transcription_start_site | - | 117244 | 117244 | -1883 | 18993 | AN4464 |
| 2795 | CONTIG77 | 118953 | 119302 | 1.07 | 1.66E-01 | transcription_start_site | - | 117042 | 117042 | -2085 | 18994 | AN4464 |
| 2795 | CONTIG77 | 118953 | 119302 | 1.07 | 1.66E-01 | transcription_start_site | - | 116803 | 116803 | -2324 | 18995 | AN4464 |
| 2795 | CONTIG77 | 118953 | 119302 | 1.07 | 1.66E-01 | transcription_start_site | - | 115264 | 115264 | -3863 | 18996 | AN4464 |
| 2795 | CONTIG77 | 118953 | 119302 | 1.07 | 1.66E-01 | transcription_start_site | - | 119318 | 119318 | 190   | 18997 | AN4465 |
| 2795 | CONTIG77 | 118953 | 119302 | 1.07 | 1.66E-01 | transcription_start_site | - | 118555 | 118555 | -572  | 18998 | AN4465 |
| 2725 | CONTIG77 | 127430 | 128100 | 1.11 | 1.33E-01 | transcription_start_site | - | 128527 | 128527 | 762   | 19004 | AN4467 |
| 2725 | CONTIG77 | 127430 | 128100 | 1.11 | 1.33E-01 | transcription_start_site | - | 128726 | 128726 | 961   | 19003 | AN4467 |
| 2725 | CONTIG77 | 127430 | 128100 | 1.11 | 1.33E-01 | transcription_start_site | - | 128892 | 128892 | 1127  | 19002 | AN4467 |
| 2725 | CONTIG77 | 127430 | 128100 | 1.11 | 1.33E-01 | transcription_start_site | - | 128971 | 128971 | 1206  | 19001 | AN4467 |
| 757  | CONTIG77 | 126096 | 126590 | 2.14 | 1.80E-03 | transcription_start_site | + | 129607 | 129607 | -3264 | 19005 | AN4468 |
| 757  | CONTIG77 | 126096 | 126590 | 2.14 | 1.80E-03 | transcription_start_site | + | 129662 | 129662 | -3319 | 19006 | AN4468 |
| 757  | CONTIG77 | 126096 | 126590 | 2.14 | 1.80E-03 | transcription_start_site | + | 129788 | 129788 | -3445 | 19007 | AN4468 |
| 757  | CONTIG77 | 126096 | 126590 | 2.14 | 1.80E-03 | transcription_start_site | + | 130118 | 130118 | -3775 | 19008 | AN4468 |
| 2725 | CONTIG77 | 127430 | 128100 | 1.11 | 1.33E-01 | transcription_start_site | + | 129607 | 129607 | -1842 | 19005 | AN4468 |
| 2725 | CONTIG77 | 127430 | 128100 | 1.11 | 1.33E-01 | transcription_start_site | + | 129662 | 129662 | -1897 | 19006 | AN4468 |
| 2725 | CONTIG77 | 127430 | 128100 | 1.11 | 1.33E-01 | transcription_start_site | + | 129788 | 129788 | -2023 | 19007 | AN4468 |
| 2725 | CONTIG77 | 127430 | 128100 | 1.11 | 1.33E-01 | transcription_start_site | + | 130118 | 130118 | -2353 | 19008 | AN4468 |
| 1949 | CONTIG78 | 4071   | 4420   | 1.39 | 8.01E-02 | transcription_start_site | - | 1825   | 1825   | -2420 | 19011 | AN4470 |
| 1949 | CONTIG78 | 4071   | 4420   | 1.39 | 8.01E-02 | transcription_start_site | - | 1235   | 1235   | -3010 | 19012 | AN4470 |
| 1949 | CONTIG78 | 4071   | 4420   | 1.39 | 8.01E-02 | transcription_start_site | - | 171    | 171    | -4074 | 19013 | AN4470 |
| 2360 | CONTIG78 | 4955   | 5529   | 1.25 | 1.07E-01 | transcription_start_site | - | 1825   | 1825   | -3417 | 19011 | AN4470 |
| 2360 | CONTIG78 | 4955   | 5529   | 1.25 | 1.07E-01 | transcription_start_site | - | 1235   | 1235   | -4007 | 19012 | AN4470 |
| 2360 | CONTIG78 | 4955   | 5529   | 1.25 | 1.07E-01 | transcription_start_site | - | 171    | 171    | -5071 | 19013 | AN4470 |
| 1949 | CONTIG78 | 4071   | 4420   | 1.39 | 8.01E-02 | transcription_start_site | - | 3924   | 3924   | -321  | 19014 | AN4471 |
| 1949 | CONTIG78 | 4071   | 4420   | 1.39 | 8.01E-02 | transcription_start_site | - | 2939   | 2939   | -1306 | 19015 | AN4471 |
| 2360 | CONTIG78 | 4955   | 5529   | 1.25 | 1.07E-01 | transcription_start_site | - | 3924   | 3924   | -1318 | 19014 | AN4471 |
| 2360 | CONTIG78 | 4955   | 5529   | 1.25 | 1.07E-01 | transcription_start_site | - | 2939   | 2939   | -2303 | 19015 | AN4471 |
| 1949 | CONTIG78 | 4071   | 4420   | 1.39 | 8.01E-02 | transcription_start_site | + | 4590   | 4590   | -344  | 19016 | AN4472 |
| 1949 | CONTIG78 | 4071   | 4420   | 1.39 | 8.01E-02 | transcription_start_site | + | 4734   | 4734   | -488  | 19017 | AN4472 |
| 1949 | CONTIG78 | 4071   | 4420   | 1.39 | 8.01E-02 | transcription_start_site | + | 4960   | 4960   | -714  | 19018 | AN4472 |

|      |          |       |       |      |          |                          |   |       |       |       |       |        |
|------|----------|-------|-------|------|----------|--------------------------|---|-------|-------|-------|-------|--------|
| 1949 | CONTIG78 | 4071  | 4420  | 1.39 | 8.01E-02 | transcription_start_site | + | 7902  | 7902  | -3656 | 19019 | AN4472 |
| 1949 | CONTIG78 | 4071  | 4420  | 1.39 | 8.01E-02 | transcription_start_site | + | 8113  | 8113  | -3867 | 19020 | AN4472 |
| 2360 | CONTIG78 | 4955  | 5529  | 1.25 | 1.07E-01 | transcription_start_site | + | 4960  | 4960  | 282   | 19018 | AN4472 |
| 2360 | CONTIG78 | 4955  | 5529  | 1.25 | 1.07E-01 | transcription_start_site | + | 4734  | 4734  | 508   | 19017 | AN4472 |
| 2360 | CONTIG78 | 4955  | 5529  | 1.25 | 1.07E-01 | transcription_start_site | + | 4590  | 4590  | 652   | 19016 | AN4472 |
| 2360 | CONTIG78 | 4955  | 5529  | 1.25 | 1.07E-01 | transcription_start_site | + | 7902  | 7902  | -2660 | 19019 | AN4472 |
| 2360 | CONTIG78 | 4955  | 5529  | 1.25 | 1.07E-01 | transcription_start_site | + | 8113  | 8113  | -2871 | 19020 | AN4472 |
| 73   | CONTIG78 | 11568 | 12502 | 3.31 | 0.00E+00 | transcription_start_site | - | 11773 | 11773 | -262  | 19021 | AN4473 |
| 73   | CONTIG78 | 11568 | 12502 | 3.31 | 0.00E+00 | transcription_start_site | - | 11381 | 11381 | -654  | 19022 | AN4473 |
| 73   | CONTIG78 | 11568 | 12502 | 3.31 | 0.00E+00 | transcription_start_site | - | 11298 | 11298 | -737  | 19023 | AN4473 |
| 885  | CONTIG78 | 10593 | 10927 | 2.01 | 7.85E-03 | transcription_start_site | - | 11298 | 11298 | 538   | 19023 | AN4473 |
| 885  | CONTIG78 | 10593 | 10927 | 2.01 | 7.85E-03 | transcription_start_site | - | 11381 | 11381 | 621   | 19022 | AN4473 |
| 885  | CONTIG78 | 10593 | 10927 | 2.01 | 7.85E-03 | transcription_start_site | - | 11773 | 11773 | 1013  | 19021 | AN4473 |
| 1459 | CONTIG78 | 14935 | 15371 | 1.61 | 3.70E-02 | transcription_start_site | - | 11773 | 11773 | -3380 | 19021 | AN4473 |
| 1459 | CONTIG78 | 14935 | 15371 | 1.61 | 3.70E-02 | transcription_start_site | - | 11381 | 11381 | -3772 | 19022 | AN4473 |
| 1459 | CONTIG78 | 14935 | 15371 | 1.61 | 3.70E-02 | transcription_start_site | - | 11298 | 11298 | -3855 | 19023 | AN4473 |
| 73   | CONTIG78 | 11568 | 12502 | 3.31 | 0.00E+00 | transcription_start_site | + | 12951 | 12951 | -916  | 19024 | AN4474 |
| 73   | CONTIG78 | 11568 | 12502 | 3.31 | 0.00E+00 | transcription_start_site | + | 13185 | 13185 | -1150 | 19025 | AN4474 |
| 885  | CONTIG78 | 10593 | 10927 | 2.01 | 7.85E-03 | transcription_start_site | + | 12951 | 12951 | -2191 | 19024 | AN4474 |
| 885  | CONTIG78 | 10593 | 10927 | 2.01 | 7.85E-03 | transcription_start_site | + | 13185 | 13185 | -2425 | 19025 | AN4474 |
| 1459 | CONTIG78 | 14935 | 15371 | 1.61 | 3.70E-02 | transcription_start_site | - | 15007 | 15007 | -146  | 19026 | AN4475 |
| 1459 | CONTIG78 | 14935 | 15371 | 1.61 | 3.70E-02 | transcription_start_site | - | 14925 | 14925 | -228  | 19027 | AN4475 |
| 1459 | CONTIG78 | 14935 | 15371 | 1.61 | 3.70E-02 | transcription_start_site | - | 14663 | 14663 | -490  | 19028 | AN4475 |
| 1459 | CONTIG78 | 14935 | 15371 | 1.61 | 3.70E-02 | transcription_start_site | - | 14342 | 14342 | -811  | 19029 | AN4475 |
| 989  | CONTIG78 | 25952 | 26320 | 1.92 | 1.11E-02 | transcription_start_site | + | 27350 | 27350 | -1214 | 19036 | AN4479 |
| 989  | CONTIG78 | 25952 | 26320 | 1.92 | 1.11E-02 | transcription_start_site | + | 27645 | 27645 | -1509 | 19037 | AN4479 |
| 138  | CONTIG78 | 38859 | 39428 | 3.08 | 0.00E+00 | transcription_start_site | - | 34838 | 34838 | -4305 | 19038 | AN4480 |
| 138  | CONTIG78 | 38859 | 39428 | 3.08 | 0.00E+00 | transcription_start_site | - | 37171 | 37171 | -1972 | 19039 | AN4481 |
| 138  | CONTIG78 | 38859 | 39428 | 3.08 | 0.00E+00 | transcription_start_site | - | 35802 | 35802 | -3341 | 19040 | AN4481 |
| 138  | CONTIG78 | 38859 | 39428 | 3.08 | 0.00E+00 | transcription_start_site | - | 35738 | 35738 | -3405 | 19041 | AN4481 |
| 138  | CONTIG78 | 38859 | 39428 | 3.08 | 0.00E+00 | transcription_start_site | - | 35558 | 35558 | -3585 | 19042 | AN4481 |
| 2717 | CONTIG78 | 42007 | 42597 | 1.12 | 1.93E-01 | transcription_start_site | - | 37171 | 37171 | -5131 | 19039 | AN4481 |
| 138  | CONTIG78 | 38859 | 39428 | 3.08 | 0.00E+00 | transcription_start_site | + | 40298 | 40298 | -1154 | 19043 | AN4482 |
| 138  | CONTIG78 | 38859 | 39428 | 3.08 | 0.00E+00 | transcription_start_site | + | 40700 | 40700 | -1556 | 19044 | AN4482 |
| 138  | CONTIG78 | 38859 | 39428 | 3.08 | 0.00E+00 | transcription_start_site | + | 40847 | 40847 | -1703 | 19045 | AN4482 |
| 138  | CONTIG78 | 38859 | 39428 | 3.08 | 0.00E+00 | transcription_start_site | + | 40909 | 40909 | -1765 | 19046 | AN4482 |
| 138  | CONTIG78 | 38859 | 39428 | 3.08 | 0.00E+00 | transcription_start_site | + | 41176 | 41176 | -2032 | 19047 | AN4482 |
| 138  | CONTIG78 | 38859 | 39428 | 3.08 | 0.00E+00 | transcription_start_site | + | 41777 | 41777 | -2633 | 19048 | AN4482 |
| 2717 | CONTIG78 | 42007 | 42597 | 1.12 | 1.93E-01 | transcription_start_site | + | 41777 | 41777 | 525   | 19048 | AN4482 |
| 2717 | CONTIG78 | 42007 | 42597 | 1.12 | 1.93E-01 | transcription_start_site | + | 41176 | 41176 | 1126  | 19047 | AN4482 |
| 936  | CONTIG78 | 46502 | 46786 | 1.97 | 8.81E-03 | transcription_start_site | - | 45899 | 45899 | -745  | 19049 | AN4483 |
| 936  | CONTIG78 | 46502 | 46786 | 1.97 | 8.81E-03 | transcription_start_site | - | 45340 | 45340 | -1304 | 19050 | AN4483 |
| 936  | CONTIG78 | 46502 | 46786 | 1.97 | 8.81E-03 | transcription_start_site | - | 45185 | 45185 | -1459 | 19051 | AN4483 |
| 936  | CONTIG78 | 46502 | 46786 | 1.97 | 8.81E-03 | transcription_start_site | - | 44893 | 44893 | -1751 | 19052 | AN4483 |
| 2624 | CONTIG78 | 43517 | 44241 | 1.16 | 1.66E-01 | transcription_start_site | - | 44893 | 44893 | 1014  | 19052 | AN4483 |
| 2624 | CONTIG78 | 43517 | 44241 | 1.16 | 1.66E-01 | transcription_start_site | - | 45185 | 45185 | 1306  | 19051 | AN4483 |
| 838  | CONTIG78 | 42917 | 43256 | 2.06 | 6.61E-03 | transcription_start_site | + | 47872 | 47872 | -4785 | 19053 | AN4484 |
| 936  | CONTIG78 | 46502 | 46786 | 1.97 | 8.81E-03 | transcription_start_site | + | 47872 | 47872 | -1228 | 19053 | AN4484 |
| 2624 | CONTIG78 | 43517 | 44241 | 1.16 | 1.66E-01 | transcription_start_site | + | 47872 | 47872 | -3993 | 19053 | AN4484 |
| 2082 | CONTIG78 | 77480 | 77769 | 1.34 | 9.24E-02 | transcription_start_site | + | 76662 | 76662 | 962   | 19089 | AN4494 |
| 2082 | CONTIG78 | 77480 | 77769 | 1.34 | 9.24E-02 | transcription_start_site | + | 76522 | 76522 | 1102  | 19088 | AN4494 |
| 1640 | CONTIG78 | 84991 | 85410 | 1.52 | 5.22E-02 | transcription_start_site | - | 82578 | 82578 | -2622 | 19091 | AN4496 |
| 1640 | CONTIG78 | 84991 | 85410 | 1.52 | 5.22E-02 | transcription_start_site | - | 82390 | 82390 | -2810 | 19092 | AN4496 |
| 1640 | CONTIG78 | 84991 | 85410 | 1.52 | 5.22E-02 | transcription_start_site | - | 82178 | 82178 | -3022 | 19093 | AN4496 |
| 1640 | CONTIG78 | 84991 | 85410 | 1.52 | 5.22E-02 | transcription_start_site | + | 84937 | 84937 | 263   | 19094 | AN4497 |
| 1460 | CONTIG78 | 95483 | 95757 | 1.61 | 3.70E-02 | transcription_start_site | - | 91218 | 91218 | -4402 | 19095 | AN4498 |
| 1460 | CONTIG78 | 95483 | 95757 | 1.61 | 3.70E-02 | transcription_start_site | - | 91056 | 91056 | -4564 | 19096 | AN4498 |



|               |        |        |      |          |                          |   |        |        |       |       |        |
|---------------|--------|--------|------|----------|--------------------------|---|--------|--------|-------|-------|--------|
| 2718 CONTIG78 | 91953  | 92237  | 1.12 | 1.93E-01 | transcription_start_site | - | 91218  | 91218  | -877  | 19095 | AN4498 |
| 2718 CONTIG78 | 91953  | 92237  | 1.12 | 1.93E-01 | transcription_start_site | - | 91056  | 91056  | -1039 | 19096 | AN4498 |
| 2718 CONTIG78 | 91953  | 92237  | 1.12 | 1.93E-01 | transcription_start_site | - | 90404  | 90404  | -1691 | 19097 | AN4498 |
| 2718 CONTIG78 | 91953  | 92237  | 1.12 | 1.93E-01 | transcription_start_site | - | 90115  | 90115  | -1980 | 19098 | AN4498 |
| 2718 CONTIG78 | 91953  | 92237  | 1.12 | 1.93E-01 | transcription_start_site | + | 91733  | 91733  | 362   | 19099 | AN4499 |
| 2718 CONTIG78 | 91953  | 92237  | 1.12 | 1.93E-01 | transcription_start_site | + | 93346  | 93346  | -1251 | 19100 | AN4499 |
| 2718 CONTIG78 | 91953  | 92237  | 1.12 | 1.93E-01 | transcription_start_site | + | 93538  | 93538  | -1443 | 19101 | AN4499 |
| 1460 CONTIG78 | 95483  | 95757  | 1.61 | 3.70E-02 | transcription_start_site | - | 94819  | 94819  | -801  | 19102 | AN4500 |
| 1460 CONTIG78 | 95483  | 95757  | 1.61 | 3.70E-02 | transcription_start_site | - | 94499  | 94499  | -1121 | 19103 | AN4500 |
| 1460 CONTIG78 | 95483  | 95757  | 1.61 | 3.70E-02 | transcription_start_site | - | 94351  | 94351  | -1269 | 19104 | AN4500 |
| 1460 CONTIG78 | 95483  | 95757  | 1.61 | 3.70E-02 | transcription_start_site | - | 94200  | 94200  | -1420 | 19105 | AN4500 |
| 1460 CONTIG78 | 95483  | 95757  | 1.61 | 3.70E-02 | transcription_start_site | + | 96592  | 96592  | -972  | 19106 | AN4501 |
| 1460 CONTIG78 | 95483  | 95757  | 1.61 | 3.70E-02 | transcription_start_site | + | 96721  | 96721  | -1101 | 19107 | AN4501 |
| 1460 CONTIG78 | 95483  | 95757  | 1.61 | 3.70E-02 | transcription_start_site | + | 97087  | 97087  | -1467 | 19108 | AN4501 |
| 1460 CONTIG78 | 95483  | 95757  | 1.61 | 3.70E-02 | transcription_start_site | + | 97381  | 97381  | -1761 | 19109 | AN4501 |
| 1460 CONTIG78 | 95483  | 95757  | 1.61 | 3.70E-02 | transcription_start_site | + | 97502  | 97502  | -1882 | 19110 | AN4501 |
| 2718 CONTIG78 | 91953  | 92237  | 1.12 | 1.93E-01 | transcription_start_site | + | 96592  | 96592  | -4497 | 19106 | AN4501 |
| 2718 CONTIG78 | 91953  | 92237  | 1.12 | 1.93E-01 | transcription_start_site | + | 96721  | 96721  | -4626 | 19107 | AN4501 |
| 2718 CONTIG78 | 91953  | 92237  | 1.12 | 1.93E-01 | transcription_start_site | + | 97087  | 97087  | -4992 | 19108 | AN4501 |
| 262 CONTIG78  | 101121 | 102287 | 2.82 | 0.00E+00 | transcription_start_site | - | 101111 | 101111 | -593  | 19111 | AN4502 |
| 262 CONTIG78  | 101121 | 102287 | 2.82 | 0.00E+00 | transcription_start_site | - | 100731 | 100731 | -973  | 19112 | AN4502 |
| 801 CONTIG78  | 103143 | 103639 | 2.1  | 5.20E-03 | transcription_start_site | - | 101111 | 101111 | -2280 | 19111 | AN4502 |
| 801 CONTIG78  | 103143 | 103639 | 2.1  | 5.20E-03 | transcription_start_site | - | 100731 | 100731 | -2660 | 19112 | AN4502 |
| 836 CONTIG78  | 104330 | 104776 | 2.06 | 2.49E-03 | transcription_start_site | - | 101111 | 101111 | -3442 | 19111 | AN4502 |
| 836 CONTIG78  | 104330 | 104776 | 2.06 | 2.49E-03 | transcription_start_site | - | 100731 | 100731 | -3822 | 19112 | AN4502 |
| 1950 CONTIG78 | 118502 | 118781 | 1.39 | 8.01E-02 | transcription_start_site | - | 117172 | 117172 | -1469 | 19125 | AN4508 |
| 1950 CONTIG78 | 118502 | 118781 | 1.39 | 8.01E-02 | transcription_start_site | - | 116591 | 116591 | -2050 | 19126 | AN4508 |
| 1950 CONTIG78 | 118502 | 118781 | 1.39 | 8.01E-02 | transcription_start_site | + | 118824 | 118824 | -182  | 19127 | AN4509 |
| 1950 CONTIG78 | 118502 | 118781 | 1.39 | 8.01E-02 | transcription_start_site | + | 119659 | 119659 | -1017 | 19128 | AN4509 |
| 2620 CONTIG78 | 126529 | 126968 | 1.16 | 1.50E-01 | transcription_start_site | - | 126481 | 126481 | -267  | 19129 | AN4510 |
| 2620 CONTIG78 | 126529 | 126968 | 1.16 | 1.50E-01 | transcription_start_site | - | 124001 | 124001 | -2747 | 19130 | AN4510 |
| 2620 CONTIG78 | 126529 | 126968 | 1.16 | 1.50E-01 | transcription_start_site | + | 129091 | 129091 | -2342 | 19133 | AN4512 |
| 2620 CONTIG78 | 126529 | 126968 | 1.16 | 1.50E-01 | transcription_start_site | + | 129180 | 129180 | -2431 | 19134 | AN4512 |
| 2620 CONTIG78 | 126529 | 126968 | 1.16 | 1.50E-01 | transcription_start_site | + | 130396 | 130396 | -3647 | 19135 | AN4513 |
| 2620 CONTIG78 | 126529 | 126968 | 1.16 | 1.50E-01 | transcription_start_site | + | 130652 | 130652 | -3903 | 19136 | AN4513 |
| 2625 CONTIG78 | 138996 | 139353 | 1.16 | 1.66E-01 | transcription_start_site | + | 140026 | 140026 | -851  | 19137 | AN4515 |
| 2625 CONTIG78 | 138996 | 139353 | 1.16 | 1.66E-01 | transcription_start_site | + | 140202 | 140202 | -1027 | 19138 | AN4515 |
| 2625 CONTIG78 | 138996 | 139353 | 1.16 | 1.66E-01 | transcription_start_site | + | 140695 | 140695 | -1520 | 19139 | AN4515 |
| 1860 CONTIG78 | 214132 | 214931 | 1.43 | 5.05E-02 | transcription_start_site | - | 213479 | 213479 | -1052 | 19202 | AN4535 |
| 1860 CONTIG78 | 214132 | 214931 | 1.43 | 5.05E-02 | transcription_start_site | - | 215749 | 215749 | 1217  | 19206 | AN4536 |
| 2365 CONTIG78 | 220212 | 220711 | 1.25 | 1.25E-01 | transcription_start_site | - | 219312 | 219312 | -1149 | 19203 | AN4536 |
| 2365 CONTIG78 | 220212 | 220711 | 1.25 | 1.25E-01 | transcription_start_site | - | 218978 | 218978 | -1483 | 19204 | AN4536 |
| 2365 CONTIG78 | 220212 | 220711 | 1.25 | 1.25E-01 | transcription_start_site | - | 218721 | 218721 | -1740 | 19205 | AN4536 |
| 2365 CONTIG78 | 220212 | 220711 | 1.25 | 1.25E-01 | transcription_start_site | - | 215749 | 215749 | -4712 | 19206 | AN4536 |
| 2365 CONTIG78 | 220212 | 220711 | 1.25 | 1.25E-01 | transcription_start_site | - | 220364 | 220364 | -97   | 19213 | AN4537 |
| 2365 CONTIG78 | 220212 | 220711 | 1.25 | 1.25E-01 | transcription_start_site | + | 223440 | 223440 | -2978 | 19214 | AN4538 |
| 707 CONTIG78  | 230937 | 231276 | 2.19 | 3.61E-03 | transcription_start_site | - | 229728 | 229728 | -1378 | 19223 | AN4541 |
| 707 CONTIG78  | 230937 | 231276 | 2.19 | 3.61E-03 | transcription_start_site | - | 229161 | 229161 | -1945 | 19224 | AN4541 |
| 2626 CONTIG78 | 232067 | 232631 | 1.16 | 1.66E-01 | transcription_start_site | - | 229728 | 229728 | -2621 | 19223 | AN4541 |
| 2626 CONTIG78 | 232067 | 232631 | 1.16 | 1.66E-01 | transcription_start_site | - | 229161 | 229161 | -3188 | 19224 | AN4541 |
| 707 CONTIG78  | 230937 | 231276 | 2.19 | 3.61E-03 | transcription_start_site | + | 232183 | 232183 | -1076 | 19225 | AN4542 |
| 707 CONTIG78  | 230937 | 231276 | 2.19 | 3.61E-03 | transcription_start_site | + | 232301 | 232301 | -1194 | 19226 | AN4542 |
| 707 CONTIG78  | 230937 | 231276 | 2.19 | 3.61E-03 | transcription_start_site | + | 233015 | 233015 | -1908 | 19227 | AN4542 |
| 2626 CONTIG78 | 232067 | 232631 | 1.16 | 1.66E-01 | transcription_start_site | + | 232301 | 232301 | 48    | 19226 | AN4542 |
| 2626 CONTIG78 | 232067 | 232631 | 1.16 | 1.66E-01 | transcription_start_site | + | 232183 | 232183 | 166   | 19225 | AN4542 |
| 2626 CONTIG78 | 232067 | 232631 | 1.16 | 1.66E-01 | transcription_start_site | + | 233015 | 233015 | -666  | 19227 | AN4542 |
| 753 CONTIG78  | 239854 | 240203 | 2.15 | 4.61E-03 | transcription_start_site | - | 236226 | 236226 | -3802 | 19228 | AN4543 |

|               |        |        |      |          |                          |   |        |        |       |       |        |
|---------------|--------|--------|------|----------|--------------------------|---|--------|--------|-------|-------|--------|
| 753 CONTIG78  | 239854 | 240203 | 2.15 | 4.61E-03 | transcription_start_site | - | 236007 | 236007 | -4021 | 19229 | AN4543 |
| 241 CONTIG78  | 242929 | 243218 | 2.86 | 0.00E+00 | transcription_start_site | - | 238917 | 238917 | -4156 | 19230 | AN4544 |
| 526 CONTIG78  | 243244 | 243893 | 2.41 | 1.22E-03 | transcription_start_site | - | 238917 | 238917 | -4651 | 19230 | AN4544 |
| 753 CONTIG78  | 239854 | 240203 | 2.15 | 4.61E-03 | transcription_start_site | - | 238917 | 238917 | -1111 | 19230 | AN4544 |
| 241 CONTIG78  | 242929 | 243218 | 2.86 | 0.00E+00 | transcription_start_site | + | 243691 | 243691 | -617  | 19231 | AN4545 |
| 241 CONTIG78  | 242929 | 243218 | 2.86 | 0.00E+00 | transcription_start_site | + | 244863 | 244863 | -1789 | 19232 | AN4545 |
| 351 CONTIG78  | 243989 | 244263 | 2.68 | 2.16E-04 | transcription_start_site | + | 243691 | 243691 | 435   | 19231 | AN4545 |
| 351 CONTIG78  | 243989 | 244263 | 2.68 | 2.16E-04 | transcription_start_site | + | 244863 | 244863 | -737  | 19232 | AN4545 |
| 526 CONTIG78  | 243244 | 243893 | 2.41 | 1.22E-03 | transcription_start_site | + | 243691 | 243691 | -122  | 19231 | AN4545 |
| 526 CONTIG78  | 243244 | 243893 | 2.41 | 1.22E-03 | transcription_start_site | + | 244863 | 244863 | -1294 | 19232 | AN4545 |
| 753 CONTIG78  | 239854 | 240203 | 2.15 | 4.61E-03 | transcription_start_site | + | 243691 | 243691 | -3662 | 19231 | AN4545 |
| 753 CONTIG78  | 239854 | 240203 | 2.15 | 4.61E-03 | transcription_start_site | + | 244863 | 244863 | -4834 | 19232 | AN4545 |
| 2621 CONTIG78 | 250069 | 250484 | 1.16 | 1.50E-01 | transcription_start_site | - | 250375 | 250375 | 98    | 19234 | AN4546 |
| 2621 CONTIG78 | 250069 | 250484 | 1.16 | 1.50E-01 | transcription_start_site | - | 250445 | 250445 | 168   | 19233 | AN4546 |
| 2621 CONTIG78 | 250069 | 250484 | 1.16 | 1.50E-01 | transcription_start_site | - | 249760 | 249760 | -516  | 19235 | AN4546 |
| 2621 CONTIG78 | 250069 | 250484 | 1.16 | 1.50E-01 | transcription_start_site | - | 249250 | 249250 | -1026 | 19236 | AN4546 |
| 2621 CONTIG78 | 250069 | 250484 | 1.16 | 1.50E-01 | transcription_start_site | + | 251217 | 251217 | -940  | 19237 | AN4547 |
| 2621 CONTIG78 | 250069 | 250484 | 1.16 | 1.50E-01 | transcription_start_site | + | 251370 | 251370 | -1093 | 19238 | AN4547 |
| 2621 CONTIG78 | 250069 | 250484 | 1.16 | 1.50E-01 | transcription_start_site | + | 251728 | 251728 | -1451 | 19239 | AN4547 |
| 2621 CONTIG78 | 250069 | 250484 | 1.16 | 1.50E-01 | transcription_start_site | + | 252748 | 252748 | -2471 | 19240 | AN4547 |
| 2621 CONTIG78 | 250069 | 250484 | 1.16 | 1.50E-01 | transcription_start_site | + | 253146 | 253146 | -2869 | 19241 | AN4547 |
| 2621 CONTIG78 | 250069 | 250484 | 1.16 | 1.50E-01 | transcription_start_site | + | 254014 | 254014 | -3737 | 19242 | AN4547 |
| 1553 CONTIG78 | 266035 | 266304 | 1.56 | 4.36E-02 | transcription_start_site | - | 265866 | 265866 | -303  | 19254 | AN4552 |
| 1553 CONTIG78 | 266035 | 266304 | 1.56 | 4.36E-02 | transcription_start_site | - | 265692 | 265692 | -477  | 19255 | AN4552 |
| 1553 CONTIG78 | 266035 | 266304 | 1.56 | 4.36E-02 | transcription_start_site | - | 265587 | 265587 | -582  | 19256 | AN4552 |
| 1553 CONTIG78 | 266035 | 266304 | 1.56 | 4.36E-02 | transcription_start_site | - | 265468 | 265468 | -701  | 19257 | AN4552 |
| 1553 CONTIG78 | 266035 | 266304 | 1.56 | 4.36E-02 | transcription_start_site | - | 265355 | 265355 | -814  | 19258 | AN4552 |
| 1553 CONTIG78 | 266035 | 266304 | 1.56 | 4.36E-02 | transcription_start_site | - | 265157 | 265157 | -1012 | 19259 | AN4552 |
| 1553 CONTIG78 | 266035 | 266304 | 1.56 | 4.36E-02 | transcription_start_site | - | 265032 | 265032 | -1137 | 19260 | AN4552 |
| 1553 CONTIG78 | 266035 | 266304 | 1.56 | 4.36E-02 | transcription_start_site | - | 264454 | 264454 | -1715 | 19261 | AN4552 |
| 1553 CONTIG78 | 266035 | 266304 | 1.56 | 4.36E-02 | transcription_start_site | - | 264019 | 264019 | -2150 | 19262 | AN4552 |
| 1553 CONTIG78 | 266035 | 266304 | 1.56 | 4.36E-02 | transcription_start_site | - | 263745 | 263745 | -2424 | 19263 | AN4552 |
| 1553 CONTIG78 | 266035 | 266304 | 1.56 | 4.36E-02 | transcription_start_site | + | 266265 | 266265 | -95   | 19264 | AN4553 |
| 1553 CONTIG78 | 266035 | 266304 | 1.56 | 4.36E-02 | transcription_start_site | + | 266352 | 266352 | -182  | 19265 | AN4553 |
| 1553 CONTIG78 | 266035 | 266304 | 1.56 | 4.36E-02 | transcription_start_site | + | 266441 | 266441 | -271  | 19266 | AN4553 |
| 1553 CONTIG78 | 266035 | 266304 | 1.56 | 4.36E-02 | transcription_start_site | + | 266773 | 266773 | -603  | 19267 | AN4553 |
| 1553 CONTIG78 | 266035 | 266304 | 1.56 | 4.36E-02 | transcription_start_site | + | 267422 | 267422 | -1252 | 19268 | AN4554 |
| 1158 CONTIG78 | 280446 | 280872 | 1.79 | 1.84E-02 | transcription_start_site | - | 276253 | 276253 | -4406 | 19278 | AN4557 |
| 1158 CONTIG78 | 280446 | 280872 | 1.79 | 1.84E-02 | transcription_start_site | - | 280067 | 280067 | -592  | 19280 | AN4558 |
| 1158 CONTIG78 | 280446 | 280872 | 1.79 | 1.84E-02 | transcription_start_site | - | 279793 | 279793 | -866  | 19281 | AN4558 |
| 1158 CONTIG78 | 280446 | 280872 | 1.79 | 1.84E-02 | transcription_start_site | - | 279607 | 279607 | -1052 | 19282 | AN4558 |
| 1158 CONTIG78 | 280446 | 280872 | 1.79 | 1.84E-02 | transcription_start_site | - | 279081 | 279081 | -1578 | 19283 | AN4558 |
| 1158 CONTIG78 | 280446 | 280872 | 1.79 | 1.84E-02 | transcription_start_site | - | 278625 | 278625 | -2034 | 19284 | AN4558 |
| 1158 CONTIG78 | 280446 | 280872 | 1.79 | 1.84E-02 | transcription_start_site | - | 278400 | 278400 | -2259 | 19285 | AN4558 |
| 1158 CONTIG78 | 280446 | 280872 | 1.79 | 1.84E-02 | transcription_start_site | - | 277780 | 277780 | -2879 | 19286 | AN4558 |
| 1158 CONTIG78 | 280446 | 280872 | 1.79 | 1.84E-02 | transcription_start_site | - | 281443 | 281443 | 784   | 19290 | AN4559 |
| 1158 CONTIG78 | 280446 | 280872 | 1.79 | 1.84E-02 | transcription_start_site | - | 281552 | 281552 | 893   | 19289 | AN4559 |
| 1158 CONTIG78 | 280446 | 280872 | 1.79 | 1.84E-02 | transcription_start_site | - | 281675 | 281675 | 1016  | 19288 | AN4559 |
| 1158 CONTIG78 | 280446 | 280872 | 1.79 | 1.84E-02 | transcription_start_site | - | 281781 | 281781 | 1122  | 19287 | AN4559 |
| 1158 CONTIG78 | 280446 | 280872 | 1.79 | 1.84E-02 | transcription_start_site | + | 282052 | 282052 | -1393 | 19291 | AN4560 |
| 1158 CONTIG78 | 280446 | 280872 | 1.79 | 1.84E-02 | transcription_start_site | + | 282126 | 282126 | -1467 | 19292 | AN4560 |
| 1158 CONTIG78 | 280446 | 280872 | 1.79 | 1.84E-02 | transcription_start_site | + | 283244 | 283244 | -2585 | 19293 | AN4561 |
| 1158 CONTIG78 | 280446 | 280872 | 1.79 | 1.84E-02 | transcription_start_site | + | 283367 | 283367 | -2708 | 19294 | AN4561 |
| 1158 CONTIG78 | 280446 | 280872 | 1.79 | 1.84E-02 | transcription_start_site | + | 283638 | 283638 | -2979 | 19295 | AN4561 |
| 1158 CONTIG78 | 280446 | 280872 | 1.79 | 1.84E-02 | transcription_start_site | + | 284061 | 284061 | -3402 | 19296 | AN4561 |
| 2720 CONTIG78 | 289501 | 289935 | 1.12 | 1.99E-01 | transcription_start_site | - | 285905 | 285905 | -3813 | 19297 | AN4562 |
| 2720 CONTIG78 | 289501 | 289935 | 1.12 | 1.99E-01 | transcription_start_site | - | 285708 | 285708 | -4010 | 19298 | AN4562 |

|               |        |        |      |          |                          |   |        |        |       |       |        |
|---------------|--------|--------|------|----------|--------------------------|---|--------|--------|-------|-------|--------|
| 2720 CONTIG78 | 289501 | 289935 | 1.12 | 1.99E-01 | transcription_start_site | - | 285372 | 285372 | -4346 | 19299 | AN4562 |
| 2720 CONTIG78 | 289501 | 289935 | 1.12 | 1.99E-01 | transcription_start_site | - | 288873 | 288873 | -845  | 19300 | AN4563 |
| 2720 CONTIG78 | 289501 | 289935 | 1.12 | 1.99E-01 | transcription_start_site | - | 288800 | 288800 | -918  | 19301 | AN4563 |
| 2720 CONTIG78 | 289501 | 289935 | 1.12 | 1.99E-01 | transcription_start_site | - | 288674 | 288674 | -1044 | 19302 | AN4563 |
| 2720 CONTIG78 | 289501 | 289935 | 1.12 | 1.99E-01 | transcription_start_site | - | 287528 | 287528 | -2190 | 19303 | AN4563 |
| 2493 CONTIG78 | 296718 | 296977 | 1.21 | 1.44E-01 | transcription_start_site | - | 295712 | 295712 | -1135 | 19304 | AN4564 |
| 2493 CONTIG78 | 296718 | 296977 | 1.21 | 1.44E-01 | transcription_start_site | - | 295375 | 295375 | -1472 | 19305 | AN4564 |
| 2493 CONTIG78 | 296718 | 296977 | 1.21 | 1.44E-01 | transcription_start_site | - | 294926 | 294926 | -1921 | 19306 | AN4564 |
| 2493 CONTIG78 | 296718 | 296977 | 1.21 | 1.44E-01 | transcription_start_site | - | 294583 | 294583 | -2264 | 19307 | AN4564 |
| 2493 CONTIG78 | 296718 | 296977 | 1.21 | 1.44E-01 | transcription_start_site | + | 297869 | 297869 | -1021 | 19308 | AN4565 |
| 2493 CONTIG78 | 296718 | 296977 | 1.21 | 1.44E-01 | transcription_start_site | + | 298387 | 298387 | -1539 | 19309 | AN4565 |
| 123 CONTIG78  | 303093 | 303362 | 3.13 | 0.00E+00 | transcription_start_site | - | 302824 | 302824 | -403  | 19310 | AN4566 |
| 123 CONTIG78  | 303093 | 303362 | 3.13 | 0.00E+00 | transcription_start_site | - | 302483 | 302483 | -744  | 19311 | AN4566 |
| 123 CONTIG78  | 303093 | 303362 | 3.13 | 0.00E+00 | transcription_start_site | - | 302248 | 302248 | -979  | 19312 | AN4566 |
| 123 CONTIG78  | 303093 | 303362 | 3.13 | 0.00E+00 | transcription_start_site | - | 300568 | 300568 | -2659 | 19313 | AN4566 |
| 123 CONTIG78  | 303093 | 303362 | 3.13 | 0.00E+00 | transcription_start_site | - | 300118 | 300118 | -3109 | 19314 | AN4566 |
| 123 CONTIG78  | 303093 | 303362 | 3.13 | 0.00E+00 | transcription_start_site | - | 299552 | 299552 | -3675 | 19315 | AN4566 |
| 1641 CONTIG78 | 302258 | 302907 | 1.52 | 5.22E-02 | transcription_start_site | - | 302483 | 302483 | -99   | 19311 | AN4566 |
| 1641 CONTIG78 | 302258 | 302907 | 1.52 | 5.22E-02 | transcription_start_site | - | 302824 | 302824 | 241   | 19310 | AN4566 |
| 1641 CONTIG78 | 302258 | 302907 | 1.52 | 5.22E-02 | transcription_start_site | - | 302248 | 302248 | -334  | 19312 | AN4566 |
| 1641 CONTIG78 | 302258 | 302907 | 1.52 | 5.22E-02 | transcription_start_site | - | 300568 | 300568 | -2014 | 19313 | AN4566 |
| 1641 CONTIG78 | 302258 | 302907 | 1.52 | 5.22E-02 | transcription_start_site | - | 300118 | 300118 | -2464 | 19314 | AN4566 |
| 1641 CONTIG78 | 302258 | 302907 | 1.52 | 5.22E-02 | transcription_start_site | - | 299552 | 299552 | -3030 | 19315 | AN4566 |
| 2494 CONTIG78 | 308780 | 309229 | 1.21 | 1.44E-01 | transcription_start_site | - | 305629 | 305629 | -3375 | 19316 | AN4567 |
| 2494 CONTIG78 | 308780 | 309229 | 1.21 | 1.44E-01 | transcription_start_site | - | 305410 | 305410 | -3594 | 19317 | AN4567 |
| 2494 CONTIG78 | 308780 | 309229 | 1.21 | 1.44E-01 | transcription_start_site | - | 304616 | 304616 | -4388 | 19318 | AN4567 |
| 2494 CONTIG78 | 308780 | 309229 | 1.21 | 1.44E-01 | transcription_start_site | - | 304451 | 304451 | -4553 | 19319 | AN4567 |
| 2494 CONTIG78 | 308780 | 309229 | 1.21 | 1.44E-01 | transcription_start_site | - | 308910 | 308910 | -94   | 19320 | AN4569 |
| 2494 CONTIG78 | 308780 | 309229 | 1.21 | 1.44E-01 | transcription_start_site | + | 309444 | 309444 | -439  | 19321 | AN4570 |
| 2494 CONTIG78 | 308780 | 309229 | 1.21 | 1.44E-01 | transcription_start_site | + | 309754 | 309754 | -749  | 19322 | AN4570 |
| 2494 CONTIG78 | 308780 | 309229 | 1.21 | 1.44E-01 | transcription_start_site | + | 310537 | 310537 | -1532 | 19323 | AN4570 |
| 2494 CONTIG78 | 308780 | 309229 | 1.21 | 1.44E-01 | transcription_start_site | + | 310726 | 310726 | -1721 | 19324 | AN4570 |
| 2494 CONTIG78 | 308780 | 309229 | 1.21 | 1.44E-01 | transcription_start_site | + | 311971 | 311971 | -2966 | 19325 | AN4571 |
| 2361 CONTIG78 | 322295 | 322864 | 1.25 | 1.07E-01 | transcription_start_site | + | 322211 | 322211 | 368   | 19335 | AN4575 |
| 2361 CONTIG78 | 322295 | 322864 | 1.25 | 1.07E-01 | transcription_start_site | + | 323784 | 323784 | -1204 | 19336 | AN4576 |
| 2361 CONTIG78 | 322295 | 322864 | 1.25 | 1.07E-01 | transcription_start_site | + | 323891 | 323891 | -1311 | 19337 | AN4576 |
| 2361 CONTIG78 | 322295 | 322864 | 1.25 | 1.07E-01 | transcription_start_site | + | 324169 | 324169 | -1589 | 19338 | AN4576 |
| 1755 CONTIG78 | 335176 | 335470 | 1.48 | 5.88E-02 | transcription_start_site | - | 331587 | 331587 | -3736 | 19350 | AN4580 |
| 1755 CONTIG78 | 335176 | 335470 | 1.48 | 5.88E-02 | transcription_start_site | - | 331467 | 331467 | -3856 | 19351 | AN4580 |
| 1755 CONTIG78 | 335176 | 335470 | 1.48 | 5.88E-02 | transcription_start_site | - | 335995 | 335995 | 672   | 19355 | AN4582 |
| 1755 CONTIG78 | 335176 | 335470 | 1.48 | 5.88E-02 | transcription_start_site | - | 336057 | 336057 | 734   | 19354 | AN4582 |
| 2366 CONTIG78 | 340746 | 341000 | 1.25 | 1.25E-01 | transcription_start_site | - | 336057 | 336057 | -4816 | 19354 | AN4582 |
| 2366 CONTIG78 | 340746 | 341000 | 1.25 | 1.25E-01 | transcription_start_site | - | 335995 | 335995 | -4878 | 19355 | AN4582 |
| 2366 CONTIG78 | 340746 | 341000 | 1.25 | 1.25E-01 | transcription_start_site | - | 337946 | 337946 | -2927 | 19356 | AN4583 |
| 2366 CONTIG78 | 340746 | 341000 | 1.25 | 1.25E-01 | transcription_start_site | - | 337861 | 337861 | -3012 | 19357 | AN4583 |
| 2366 CONTIG78 | 340746 | 341000 | 1.25 | 1.25E-01 | transcription_start_site | - | 337739 | 337739 | -3134 | 19358 | AN4583 |
| 2366 CONTIG78 | 340746 | 341000 | 1.25 | 1.25E-01 | transcription_start_site | - | 337676 | 337676 | -3197 | 19359 | AN4583 |
| 2366 CONTIG78 | 340746 | 341000 | 1.25 | 1.25E-01 | transcription_start_site | - | 337531 | 337531 | -3342 | 19360 | AN4583 |
| 1756 CONTIG78 | 343893 | 344302 | 1.48 | 5.88E-02 | transcription_start_site | - | 339053 | 339053 | -5044 | 19361 | AN4584 |
| 1756 CONTIG78 | 343893 | 344302 | 1.48 | 5.88E-02 | transcription_start_site | - | 338931 | 338931 | -5166 | 19362 | AN4584 |
| 2366 CONTIG78 | 340746 | 341000 | 1.25 | 1.25E-01 | transcription_start_site | - | 339053 | 339053 | -1820 | 19361 | AN4584 |
| 2366 CONTIG78 | 340746 | 341000 | 1.25 | 1.25E-01 | transcription_start_site | - | 338931 | 338931 | -1942 | 19362 | AN4584 |
| 2366 CONTIG78 | 340746 | 341000 | 1.25 | 1.25E-01 | transcription_start_site | - | 338860 | 338860 | -2013 | 19363 | AN4584 |
| 2366 CONTIG78 | 340746 | 341000 | 1.25 | 1.25E-01 | transcription_start_site | - | 338564 | 338564 | -2309 | 19364 | AN4584 |
| 1755 CONTIG78 | 335176 | 335470 | 1.48 | 5.88E-02 | transcription_start_site | + | 339770 | 339770 | -4447 | 19365 | AN4585 |
| 1755 CONTIG78 | 335176 | 335470 | 1.48 | 5.88E-02 | transcription_start_site | + | 340071 | 340071 | -4748 | 19366 | AN4585 |
| 2366 CONTIG78 | 340746 | 341000 | 1.25 | 1.25E-01 | transcription_start_site | + | 341656 | 341656 | -783  | 19367 | AN4585 |

|      |          |        |        |      |          |                          |   |        |        |       |       |        |
|------|----------|--------|--------|------|----------|--------------------------|---|--------|--------|-------|-------|--------|
| 2366 | CONTIG78 | 340746 | 341000 | 1.25 | 1.25E-01 | transcription_start_site | + | 340071 | 340071 | 802   | 19366 | AN4585 |
| 2366 | CONTIG78 | 340746 | 341000 | 1.25 | 1.25E-01 | transcription_start_site | + | 339770 | 339770 | 1103  | 19365 | AN4585 |
| 1756 | CONTIG78 | 343893 | 344302 | 1.48 | 5.88E-02 | transcription_start_site | + | 344129 | 344129 | -31   | 19370 | AN4586 |
| 1756 | CONTIG78 | 343893 | 344302 | 1.48 | 5.88E-02 | transcription_start_site | + | 343652 | 343652 | 445   | 19369 | AN4586 |
| 1756 | CONTIG78 | 343893 | 344302 | 1.48 | 5.88E-02 | transcription_start_site | + | 343575 | 343575 | 522   | 19368 | AN4586 |
| 2366 | CONTIG78 | 340746 | 341000 | 1.25 | 1.25E-01 | transcription_start_site | + | 343575 | 343575 | -2702 | 19368 | AN4586 |
| 2366 | CONTIG78 | 340746 | 341000 | 1.25 | 1.25E-01 | transcription_start_site | + | 343652 | 343652 | -2779 | 19369 | AN4586 |
| 2366 | CONTIG78 | 340746 | 341000 | 1.25 | 1.25E-01 | transcription_start_site | + | 344129 | 344129 | -3256 | 19370 | AN4586 |
| 1756 | CONTIG78 | 343893 | 344302 | 1.48 | 5.88E-02 | transcription_start_site | - | 345148 | 345148 | 1050  | 19373 | AN4587 |
| 1756 | CONTIG78 | 343893 | 344302 | 1.48 | 5.88E-02 | transcription_start_site | + | 348360 | 348360 | -4262 | 19374 | AN4588 |
| 1756 | CONTIG78 | 343893 | 344302 | 1.48 | 5.88E-02 | transcription_start_site | + | 348581 | 348581 | -4483 | 19375 | AN4588 |
| 1050 | CONTIG79 | 7658   | 7927   | 1.87 | 7.85E-03 | transcription_start_site | - | 4467   | 4467   | -3325 | 19385 | AN4591 |
| 1050 | CONTIG79 | 7658   | 7927   | 1.87 | 7.85E-03 | transcription_start_site | - | 4400   | 4400   | -3392 | 19386 | AN4591 |
| 1050 | CONTIG79 | 7658   | 7927   | 1.87 | 7.85E-03 | transcription_start_site | - | 4317   | 4317   | -3475 | 19387 | AN4591 |
| 1050 | CONTIG79 | 7658   | 7927   | 1.87 | 7.85E-03 | transcription_start_site | - | 4172   | 4172   | -3620 | 19388 | AN4591 |
| 1050 | CONTIG79 | 7658   | 7927   | 1.87 | 7.85E-03 | transcription_start_site | - | 3736   | 3736   | -4056 | 19389 | AN4591 |
| 1050 | CONTIG79 | 7658   | 7927   | 1.87 | 7.85E-03 | transcription_start_site | - | 3452   | 3452   | -4340 | 19390 | AN4591 |
| 1050 | CONTIG79 | 7658   | 7927   | 1.87 | 7.85E-03 | transcription_start_site | - | 3112   | 3112   | -4680 | 19391 | AN4591 |
| 2358 | CONTIG79 | 246    | 500    | 1.25 | 9.24E-02 | transcription_start_site | + | 4821   | 4821   | -4448 | 19393 | AN4592 |
| 2358 | CONTIG79 | 246    | 500    | 1.25 | 9.24E-02 | transcription_start_site | + | 5064   | 5064   | -4691 | 19394 | AN4592 |
| 1806 | CONTIG79 | 11038  | 11387  | 1.45 | 4.36E-02 | transcription_start_site | - | 9042   | 9042   | -2170 | 19395 | AN4593 |
| 1050 | CONTIG79 | 7658   | 7927   | 1.87 | 7.85E-03 | transcription_start_site | + | 9706   | 9706   | -1913 | 19396 | AN4594 |
| 1050 | CONTIG79 | 7658   | 7927   | 1.87 | 7.85E-03 | transcription_start_site | + | 9831   | 9831   | -2038 | 19397 | AN4594 |
| 1050 | CONTIG79 | 7658   | 7927   | 1.87 | 7.85E-03 | transcription_start_site | + | 10139  | 10139  | -2346 | 19398 | AN4594 |
| 1806 | CONTIG79 | 11038  | 11387  | 1.45 | 4.36E-02 | transcription_start_site | + | 10139  | 10139  | 1073  | 19398 | AN4594 |
| 1806 | CONTIG79 | 11038  | 11387  | 1.45 | 4.36E-02 | transcription_start_site | - | 11931  | 11931  | 718   | 19402 | AN4595 |
| 1806 | CONTIG79 | 11038  | 11387  | 1.45 | 4.36E-02 | transcription_start_site | - | 12032  | 12032  | 819   | 19401 | AN4595 |
| 1806 | CONTIG79 | 11038  | 11387  | 1.45 | 4.36E-02 | transcription_start_site | - | 12316  | 12316  | 1103  | 19400 | AN4595 |
| 1806 | CONTIG79 | 11038  | 11387  | 1.45 | 4.36E-02 | transcription_start_site | + | 14303  | 14303  | -3090 | 19406 | AN4597 |
| 1503 | CONTIG79 | 23853  | 24127  | 1.58 | 2.62E-02 | transcription_start_site | - | 21942  | 21942  | -2048 | 19412 | AN4598 |
| 1503 | CONTIG79 | 23853  | 24127  | 1.58 | 2.62E-02 | transcription_start_site | - | 21591  | 21591  | -2399 | 19413 | AN4598 |
| 1590 | CONTIG79 | 22593  | 23696  | 1.54 | 1.81E-02 | transcription_start_site | - | 21942  | 21942  | -1202 | 19412 | AN4598 |
| 1590 | CONTIG79 | 22593  | 23696  | 1.54 | 1.81E-02 | transcription_start_site | - | 21591  | 21591  | -1553 | 19413 | AN4598 |
| 2002 | CONTIG79 | 25959  | 26322  | 1.37 | 5.88E-02 | transcription_start_site | - | 21942  | 21942  | -4198 | 19412 | AN4598 |
| 2002 | CONTIG79 | 25959  | 26322  | 1.37 | 5.88E-02 | transcription_start_site | - | 21591  | 21591  | -4549 | 19413 | AN4598 |
| 2855 | CONTIG79 | 20638  | 21202  | 1.04 | 1.79E-01 | transcription_start_site | - | 21591  | 21591  | 671   | 19413 | AN4598 |
| 2855 | CONTIG79 | 20638  | 21202  | 1.04 | 1.79E-01 | transcription_start_site | - | 21942  | 21942  | 1022  | 19412 | AN4598 |
| 744  | CONTIG79 | 30321  | 30575  | 2.16 | 1.80E-03 | transcription_start_site | - | 28467  | 28467  | -1981 | 19414 | AN4599 |
| 744  | CONTIG79 | 30321  | 30575  | 2.16 | 1.80E-03 | transcription_start_site | - | 28367  | 28367  | -2081 | 19415 | AN4599 |
| 744  | CONTIG79 | 30321  | 30575  | 2.16 | 1.80E-03 | transcription_start_site | - | 27912  | 27912  | -2536 | 19416 | AN4599 |
| 744  | CONTIG79 | 30321  | 30575  | 2.16 | 1.80E-03 | transcription_start_site | - | 27739  | 27739  | -2709 | 19417 | AN4599 |
| 744  | CONTIG79 | 30321  | 30575  | 2.16 | 1.80E-03 | transcription_start_site | - | 27377  | 27377  | -3071 | 19418 | AN4599 |
| 1503 | CONTIG79 | 23853  | 24127  | 1.58 | 2.62E-02 | transcription_start_site | + | 28811  | 28811  | -4821 | 19419 | AN4600 |
| 1503 | CONTIG79 | 23853  | 24127  | 1.58 | 2.62E-02 | transcription_start_site | + | 29072  | 29072  | -5082 | 19420 | AN4600 |
| 2002 | CONTIG79 | 25959  | 26322  | 1.37 | 5.88E-02 | transcription_start_site | + | 28811  | 28811  | -2670 | 19419 | AN4600 |
| 2002 | CONTIG79 | 25959  | 26322  | 1.37 | 5.88E-02 | transcription_start_site | + | 29072  | 29072  | -2931 | 19420 | AN4600 |
| 744  | CONTIG79 | 30321  | 30575  | 2.16 | 1.80E-03 | transcription_start_site | + | 31188  | 31188  | -740  | 19421 | AN4601 |
| 744  | CONTIG79 | 30321  | 30575  | 2.16 | 1.80E-03 | transcription_start_site | + | 32546  | 32546  | -2098 | 19422 | AN4601 |
| 744  | CONTIG79 | 30321  | 30575  | 2.16 | 1.80E-03 | transcription_start_site | + | 35178  | 35178  | -4730 | 19423 | AN4601 |
| 2002 | CONTIG79 | 25959  | 26322  | 1.37 | 5.88E-02 | transcription_start_site | + | 31188  | 31188  | -5047 | 19421 | AN4601 |
| 650  | CONTIG79 | 40652  | 41003  | 2.24 | 1.22E-03 | transcription_start_site | - | 36814  | 36814  | -4013 | 19424 | AN4602 |
| 650  | CONTIG79 | 40652  | 41003  | 2.24 | 1.22E-03 | transcription_start_site | - | 36723  | 36723  | -4104 | 19425 | AN4602 |
| 650  | CONTIG79 | 40652  | 41003  | 2.24 | 1.22E-03 | transcription_start_site | - | 36186  | 36186  | -4641 | 19426 | AN4602 |
| 1417 | CONTIG79 | 39153  | 40042  | 1.62 | 7.64E-03 | transcription_start_site | - | 36814  | 36814  | -2783 | 19424 | AN4602 |
| 1417 | CONTIG79 | 39153  | 40042  | 1.62 | 7.64E-03 | transcription_start_site | - | 36723  | 36723  | -2874 | 19425 | AN4602 |
| 1417 | CONTIG79 | 39153  | 40042  | 1.62 | 7.64E-03 | transcription_start_site | - | 36186  | 36186  | -3411 | 19426 | AN4602 |
| 650  | CONTIG79 | 40652  | 41003  | 2.24 | 1.22E-03 | transcription_start_site | - | 40222  | 40222  | -605  | 19427 | AN4603 |

|               |        |        |      |          |                          |   |        |        |       |       |        |
|---------------|--------|--------|------|----------|--------------------------|---|--------|--------|-------|-------|--------|
| 650 CONTIG79  | 40652  | 41003  | 2.24 | 1.22E-03 | transcription_start_site | - | 39671  | 39671  | -1156 | 19428 | AN4603 |
| 1417 CONTIG79 | 39153  | 40042  | 1.62 | 7.64E-03 | transcription_start_site | - | 39671  | 39671  | 73    | 19428 | AN4603 |
| 1417 CONTIG79 | 39153  | 40042  | 1.62 | 7.64E-03 | transcription_start_site | - | 40222  | 40222  | 624   | 19427 | AN4603 |
| 650 CONTIG79  | 40652  | 41003  | 2.24 | 1.22E-03 | transcription_start_site | + | 44830  | 44830  | -4002 | 19434 | AN4605 |
| 650 CONTIG79  | 40652  | 41003  | 2.24 | 1.22E-03 | transcription_start_site | + | 45419  | 45419  | -4591 | 19435 | AN4605 |
| 1417 CONTIG79 | 39153  | 40042  | 1.62 | 7.64E-03 | transcription_start_site | + | 44830  | 44830  | -5232 | 19434 | AN4605 |
| 1351 CONTIG79 | 66768  | 67267  | 1.66 | 1.84E-02 | transcription_start_site | - | 65348  | 65348  | -1669 | 19456 | AN4613 |
| 2512 CONTIG79 | 70278  | 70632  | 1.2  | 1.08E-01 | transcription_start_site | - | 65348  | 65348  | -5107 | 19456 | AN4613 |
| 2788 CONTIG79 | 69393  | 69657  | 1.08 | 1.66E-01 | transcription_start_site | - | 65348  | 65348  | -4177 | 19456 | AN4613 |
| 1351 CONTIG79 | 66768  | 67267  | 1.66 | 1.84E-02 | transcription_start_site | - | 66758  | 66758  | -259  | 19457 | AN4614 |
| 1351 CONTIG79 | 66768  | 67267  | 1.66 | 1.84E-02 | transcription_start_site | - | 66625  | 66625  | -392  | 19458 | AN4614 |
| 1351 CONTIG79 | 66768  | 67267  | 1.66 | 1.84E-02 | transcription_start_site | - | 66376  | 66376  | -641  | 19459 | AN4614 |
| 1351 CONTIG79 | 66768  | 67267  | 1.66 | 1.84E-02 | transcription_start_site | - | 66023  | 66023  | -994  | 19460 | AN4614 |
| 2512 CONTIG79 | 70278  | 70632  | 1.2  | 1.08E-01 | transcription_start_site | - | 66758  | 66758  | -3697 | 19457 | AN4614 |
| 2512 CONTIG79 | 70278  | 70632  | 1.2  | 1.08E-01 | transcription_start_site | - | 66625  | 66625  | -3830 | 19458 | AN4614 |
| 2512 CONTIG79 | 70278  | 70632  | 1.2  | 1.08E-01 | transcription_start_site | - | 66376  | 66376  | -4079 | 19459 | AN4614 |
| 2512 CONTIG79 | 70278  | 70632  | 1.2  | 1.08E-01 | transcription_start_site | - | 66023  | 66023  | -4432 | 19460 | AN4614 |
| 2788 CONTIG79 | 69393  | 69657  | 1.08 | 1.66E-01 | transcription_start_site | - | 66758  | 66758  | -2767 | 19457 | AN4614 |
| 2788 CONTIG79 | 69393  | 69657  | 1.08 | 1.66E-01 | transcription_start_site | - | 66625  | 66625  | -2900 | 19458 | AN4614 |
| 2788 CONTIG79 | 69393  | 69657  | 1.08 | 1.66E-01 | transcription_start_site | - | 66376  | 66376  | -3149 | 19459 | AN4614 |
| 2788 CONTIG79 | 69393  | 69657  | 1.08 | 1.66E-01 | transcription_start_site | - | 66023  | 66023  | -3502 | 19460 | AN4614 |
| 1351 CONTIG79 | 66768  | 67267  | 1.66 | 1.84E-02 | transcription_start_site | + | 67480  | 67480  | -462  | 19461 | AN4615 |
| 1351 CONTIG79 | 66768  | 67267  | 1.66 | 1.84E-02 | transcription_start_site | + | 67551  | 67551  | -533  | 19462 | AN4615 |
| 1351 CONTIG79 | 66768  | 67267  | 1.66 | 1.84E-02 | transcription_start_site | + | 67905  | 67905  | -887  | 19463 | AN4615 |
| 1351 CONTIG79 | 66768  | 67267  | 1.66 | 1.84E-02 | transcription_start_site | + | 68141  | 68141  | -1123 | 19464 | AN4615 |
| 2512 CONTIG79 | 70278  | 70632  | 1.2  | 1.08E-01 | transcription_start_site | - | 70584  | 70584  | 129   | 19468 | AN4616 |
| 2512 CONTIG79 | 70278  | 70632  | 1.2  | 1.08E-01 | transcription_start_site | - | 70773  | 70773  | 318   | 19467 | AN4616 |
| 2512 CONTIG79 | 70278  | 70632  | 1.2  | 1.08E-01 | transcription_start_site | - | 70889  | 70889  | 434   | 19466 | AN4616 |
| 2512 CONTIG79 | 70278  | 70632  | 1.2  | 1.08E-01 | transcription_start_site | - | 71055  | 71055  | 600   | 19465 | AN4616 |
| 2788 CONTIG79 | 69393  | 69657  | 1.08 | 1.66E-01 | transcription_start_site | - | 70584  | 70584  | 1059  | 19468 | AN4616 |
| 1351 CONTIG79 | 66768  | 67267  | 1.66 | 1.84E-02 | transcription_start_site | + | 71505  | 71505  | -4487 | 19469 | AN4617 |
| 2512 CONTIG79 | 70278  | 70632  | 1.2  | 1.08E-01 | transcription_start_site | + | 71505  | 71505  | -1050 | 19469 | AN4617 |
| 2788 CONTIG79 | 69393  | 69657  | 1.08 | 1.66E-01 | transcription_start_site | + | 71505  | 71505  | -1980 | 19469 | AN4617 |
| 2512 CONTIG79 | 70278  | 70632  | 1.2  | 1.08E-01 | transcription_start_site | + | 72525  | 72525  | -2070 | 19470 | AN4618 |
| 2512 CONTIG79 | 70278  | 70632  | 1.2  | 1.08E-01 | transcription_start_site | + | 72637  | 72637  | -2182 | 19471 | AN4618 |
| 2788 CONTIG79 | 69393  | 69657  | 1.08 | 1.66E-01 | transcription_start_site | + | 72525  | 72525  | -3000 | 19470 | AN4618 |
| 2788 CONTIG79 | 69393  | 69657  | 1.08 | 1.66E-01 | transcription_start_site | + | 72637  | 72637  | -3112 | 19471 | AN4618 |
| 560 CONTIG79  | 84826  | 85250  | 2.37 | 8.69E-04 | transcription_start_site | + | 84301  | 84301  | 737   | 19483 | AN4621 |
| 560 CONTIG79  | 84826  | 85250  | 2.37 | 8.69E-04 | transcription_start_site | + | 83864  | 83864  | 1174  | 19482 | AN4621 |
| 523 CONTIG79  | 86626  | 86920  | 2.41 | 5.64E-04 | transcription_start_site | + | 88024  | 88024  | -1251 | 19484 | AN4622 |
| 523 CONTIG79  | 86626  | 86920  | 2.41 | 5.64E-04 | transcription_start_site | + | 88647  | 88647  | -1874 | 19485 | AN4622 |
| 560 CONTIG79  | 84826  | 85250  | 2.37 | 8.69E-04 | transcription_start_site | + | 88024  | 88024  | -2986 | 19484 | AN4622 |
| 560 CONTIG79  | 84826  | 85250  | 2.37 | 8.69E-04 | transcription_start_site | + | 88647  | 88647  | -3609 | 19485 | AN4622 |
| 1105 CONTIG79 | 87156  | 87735  | 1.83 | 8.81E-03 | transcription_start_site | + | 88024  | 88024  | -578  | 19484 | AN4622 |
| 1105 CONTIG79 | 87156  | 87735  | 1.83 | 8.81E-03 | transcription_start_site | + | 88647  | 88647  | -1201 | 19485 | AN4622 |
| 523 CONTIG79  | 86626  | 86920  | 2.41 | 5.64E-04 | transcription_start_site | + | 90167  | 90167  | -3394 | 19486 | AN4623 |
| 523 CONTIG79  | 86626  | 86920  | 2.41 | 5.64E-04 | transcription_start_site | + | 90376  | 90376  | -3603 | 19487 | AN4623 |
| 523 CONTIG79  | 86626  | 86920  | 2.41 | 5.64E-04 | transcription_start_site | + | 90785  | 90785  | -4012 | 19488 | AN4623 |
| 523 CONTIG79  | 86626  | 86920  | 2.41 | 5.64E-04 | transcription_start_site | + | 91651  | 91651  | -4878 | 19489 | AN4623 |
| 560 CONTIG79  | 84826  | 85250  | 2.37 | 8.69E-04 | transcription_start_site | + | 90167  | 90167  | -5129 | 19486 | AN4623 |
| 1105 CONTIG79 | 87156  | 87735  | 1.83 | 8.81E-03 | transcription_start_site | + | 90167  | 90167  | -2721 | 19486 | AN4623 |
| 1105 CONTIG79 | 87156  | 87735  | 1.83 | 8.81E-03 | transcription_start_site | + | 90376  | 90376  | -2930 | 19487 | AN4623 |
| 1105 CONTIG79 | 87156  | 87735  | 1.83 | 8.81E-03 | transcription_start_site | + | 90785  | 90785  | -3339 | 19488 | AN4623 |
| 1105 CONTIG79 | 87156  | 87735  | 1.83 | 8.81E-03 | transcription_start_site | + | 91651  | 91651  | -4205 | 19489 | AN4623 |
| 1105 CONTIG79 | 87156  | 87735  | 1.83 | 8.81E-03 | transcription_start_site | + | 91961  | 91961  | -4515 | 19490 | AN4623 |
| 2359 CONTIG79 | 106446 | 106945 | 1.25 | 9.24E-02 | transcription_start_site | - | 102213 | 102213 | -4482 | 19496 | AN4626 |
| 2359 CONTIG79 | 106446 | 106945 | 1.25 | 9.24E-02 | transcription_start_site | - | 106558 | 106558 | -137  | 19499 | AN4628 |

|      |          |        |        |      |          |                          |   |        |        |       |       |        |
|------|----------|--------|--------|------|----------|--------------------------|---|--------|--------|-------|-------|--------|
| 2359 | CONTIG79 | 106446 | 106945 | 1.25 | 9.24E-02 | transcription_start_site | - | 106398 | 106398 | -297  | 19500 | AN4628 |
| 2359 | CONTIG79 | 106446 | 106945 | 1.25 | 9.24E-02 | transcription_start_site | - | 106059 | 106059 | -636  | 19501 | AN4628 |
| 2359 | CONTIG79 | 106446 | 106945 | 1.25 | 9.24E-02 | transcription_start_site | - | 105691 | 105691 | -1004 | 19502 | AN4628 |
| 2359 | CONTIG79 | 106446 | 106945 | 1.25 | 9.24E-02 | transcription_start_site | - | 105520 | 105520 | -1175 | 19503 | AN4628 |
| 2359 | CONTIG79 | 106446 | 106945 | 1.25 | 9.24E-02 | transcription_start_site | - | 104929 | 104929 | -1766 | 19504 | AN4628 |
| 2359 | CONTIG79 | 106446 | 106945 | 1.25 | 9.24E-02 | transcription_start_site | - | 104758 | 104758 | -1937 | 19505 | AN4628 |
| 2359 | CONTIG79 | 106446 | 106945 | 1.25 | 9.24E-02 | transcription_start_site | + | 106683 | 106683 | 12    | 19506 | AN4629 |
| 2359 | CONTIG79 | 106446 | 106945 | 1.25 | 9.24E-02 | transcription_start_site | + | 107052 | 107052 | -356  | 19507 | AN4629 |
| 2359 | CONTIG79 | 106446 | 106945 | 1.25 | 9.24E-02 | transcription_start_site | + | 109844 | 109844 | -3148 | 19508 | AN4630 |
| 2359 | CONTIG79 | 106446 | 106945 | 1.25 | 9.24E-02 | transcription_start_site | + | 110428 | 110428 | -3732 | 19509 | AN4630 |
| 2359 | CONTIG79 | 106446 | 106945 | 1.25 | 9.24E-02 | transcription_start_site | + | 110816 | 110816 | -4120 | 19510 | AN4630 |
| 1807 | CONTIG79 | 123826 | 124100 | 1.45 | 4.36E-02 | transcription_start_site | - | 121335 | 121335 | -2628 | 19521 | AN4634 |
| 1807 | CONTIG79 | 123826 | 124100 | 1.45 | 4.36E-02 | transcription_start_site | - | 121028 | 121028 | -2935 | 19522 | AN4634 |
| 1807 | CONTIG79 | 123826 | 124100 | 1.45 | 4.36E-02 | transcription_start_site | - | 120811 | 120811 | -3152 | 19523 | AN4634 |
| 1807 | CONTIG79 | 123826 | 124100 | 1.45 | 4.36E-02 | transcription_start_site | - | 119920 | 119920 | -4043 | 19524 | AN4634 |
| 1423 | CONTIG79 | 128417 | 128761 | 1.62 | 2.12E-02 | transcription_start_site | - | 128609 | 128609 | 20    | 19525 | AN4636 |
| 1423 | CONTIG79 | 128417 | 128761 | 1.62 | 2.12E-02 | transcription_start_site | - | 128423 | 128423 | -166  | 19526 | AN4636 |
| 1423 | CONTIG79 | 128417 | 128761 | 1.62 | 2.12E-02 | transcription_start_site | - | 127759 | 127759 | -830  | 19527 | AN4636 |
| 2789 | CONTIG79 | 132082 | 132360 | 1.08 | 1.66E-01 | transcription_start_site | - | 128609 | 128609 | -3612 | 19525 | AN4636 |
| 2789 | CONTIG79 | 132082 | 132360 | 1.08 | 1.66E-01 | transcription_start_site | - | 128423 | 128423 | -3798 | 19526 | AN4636 |
| 2789 | CONTIG79 | 132082 | 132360 | 1.08 | 1.66E-01 | transcription_start_site | - | 127759 | 127759 | -4462 | 19527 | AN4636 |
| 1423 | CONTIG79 | 128417 | 128761 | 1.62 | 2.12E-02 | transcription_start_site | - | 129325 | 129325 | 736   | 19529 | AN4637 |
| 2789 | CONTIG79 | 132082 | 132360 | 1.08 | 1.66E-01 | transcription_start_site | - | 131487 | 131487 | -734  | 19528 | AN4637 |
| 2789 | CONTIG79 | 132082 | 132360 | 1.08 | 1.66E-01 | transcription_start_site | - | 129325 | 129325 | -2896 | 19529 | AN4637 |
| 1423 | CONTIG79 | 128417 | 128761 | 1.62 | 2.12E-02 | transcription_start_site | + | 133141 | 133141 | -4552 | 19530 | AN4638 |
| 1423 | CONTIG79 | 128417 | 128761 | 1.62 | 2.12E-02 | transcription_start_site | + | 133472 | 133472 | -4883 | 19531 | AN4638 |
| 2789 | CONTIG79 | 132082 | 132360 | 1.08 | 1.66E-01 | transcription_start_site | + | 133141 | 133141 | -920  | 19530 | AN4638 |
| 2789 | CONTIG79 | 132082 | 132360 | 1.08 | 1.66E-01 | transcription_start_site | + | 133472 | 133472 | -1251 | 19531 | AN4638 |
| 1591 | CONTIG79 | 159696 | 160410 | 1.54 | 1.81E-02 | transcription_start_site | - | 159281 | 159281 | -772  | 19547 | AN4642 |
| 1591 | CONTIG79 | 159696 | 160410 | 1.54 | 1.81E-02 | transcription_start_site | - | 159088 | 159088 | -965  | 19548 | AN4642 |
| 1591 | CONTIG79 | 159696 | 160410 | 1.54 | 1.81E-02 | transcription_start_site | - | 158757 | 158757 | -1296 | 19549 | AN4642 |
| 1591 | CONTIG79 | 159696 | 160410 | 1.54 | 1.81E-02 | transcription_start_site | - | 158555 | 158555 | -1498 | 19550 | AN4642 |
| 1591 | CONTIG79 | 159696 | 160410 | 1.54 | 1.81E-02 | transcription_start_site | - | 158236 | 158236 | -1817 | 19551 | AN4642 |
| 1686 | CONTIG79 | 176337 | 176691 | 1.5  | 2.18E-02 | transcription_start_site | - | 172809 | 172809 | -3705 | 19566 | AN4648 |
| 1690 | CONTIG79 | 177457 | 177726 | 1.5  | 3.70E-02 | transcription_start_site | - | 172809 | 172809 | -4782 | 19566 | AN4648 |
| 1686 | CONTIG79 | 176337 | 176691 | 1.5  | 2.18E-02 | transcription_start_site | + | 176922 | 176922 | -408  | 19570 | AN4650 |
| 1686 | CONTIG79 | 176337 | 176691 | 1.5  | 2.18E-02 | transcription_start_site | + | 177189 | 177189 | -675  | 19571 | AN4650 |
| 1687 | CONTIG79 | 177832 | 179076 | 1.5  | 2.18E-02 | transcription_start_site | + | 177189 | 177189 | 1265  | 19571 | AN4650 |
| 1687 | CONTIG79 | 177832 | 179076 | 1.5  | 2.18E-02 | transcription_start_site | + | 176922 | 176922 | 1532  | 19570 | AN4650 |
| 1690 | CONTIG79 | 177457 | 177726 | 1.5  | 3.70E-02 | transcription_start_site | + | 177189 | 177189 | 402   | 19571 | AN4650 |
| 1690 | CONTIG79 | 177457 | 177726 | 1.5  | 3.70E-02 | transcription_start_site | + | 176922 | 176922 | 669   | 19570 | AN4650 |
| 2614 | CONTIG79 | 188937 | 189201 | 1.16 | 1.25E-01 | transcription_start_site | + | 190170 | 190170 | -1101 | 19572 | AN4652 |
| 2614 | CONTIG79 | 188937 | 189201 | 1.16 | 1.25E-01 | transcription_start_site | + | 190292 | 190292 | -1223 | 19573 | AN4652 |
| 2513 | CONTIG79 | 192617 | 193113 | 1.2  | 1.08E-01 | transcription_start_site | - | 192781 | 192781 | -84   | 19574 | AN4653 |
| 2513 | CONTIG79 | 192617 | 193113 | 1.2  | 1.08E-01 | transcription_start_site | - | 192592 | 192592 | -273  | 19575 | AN4653 |
| 2513 | CONTIG79 | 192617 | 193113 | 1.2  | 1.08E-01 | transcription_start_site | - | 192287 | 192287 | -578  | 19576 | AN4653 |
| 2513 | CONTIG79 | 192617 | 193113 | 1.2  | 1.08E-01 | transcription_start_site | - | 191950 | 191950 | -915  | 19577 | AN4653 |
| 2513 | CONTIG79 | 192617 | 193113 | 1.2  | 1.08E-01 | transcription_start_site | - | 194112 | 194112 | 1247  | 19579 | AN4654 |
| 2215 | CONTIG79 | 201838 | 202640 | 1.29 | 5.52E-02 | transcription_start_site | - | 201793 | 201793 | -446  | 19583 | AN4657 |
| 2215 | CONTIG79 | 201838 | 202640 | 1.29 | 5.52E-02 | transcription_start_site | - | 201285 | 201285 | -954  | 19584 | AN4657 |
| 2215 | CONTIG79 | 201838 | 202640 | 1.29 | 5.52E-02 | transcription_start_site | - | 200784 | 200784 | -1455 | 19585 | AN4657 |
| 2215 | CONTIG79 | 201838 | 202640 | 1.29 | 5.52E-02 | transcription_start_site | + | 203932 | 203932 | -1693 | 19586 | AN4658 |
| 2215 | CONTIG79 | 201838 | 202640 | 1.29 | 5.52E-02 | transcription_start_site | + | 205750 | 205750 | -3511 | 19587 | AN4659 |
| 2215 | CONTIG79 | 201838 | 202640 | 1.29 | 5.52E-02 | transcription_start_site | + | 205947 | 205947 | -3708 | 19588 | AN4659 |
| 2215 | CONTIG79 | 201838 | 202640 | 1.29 | 5.52E-02 | transcription_start_site | + | 206091 | 206091 | -3852 | 19589 | AN4659 |
| 2215 | CONTIG79 | 201838 | 202640 | 1.29 | 5.52E-02 | transcription_start_site | + | 206341 | 206341 | -4102 | 19590 | AN4659 |
| 2215 | CONTIG79 | 201838 | 202640 | 1.29 | 5.52E-02 | transcription_start_site | + | 207461 | 207461 | -5222 | 19591 | AN4659 |



|      |          |       |       |      |          |                          |   |       |       |       |       |        |
|------|----------|-------|-------|------|----------|--------------------------|---|-------|-------|-------|-------|--------|
| 1511 | CONTIG80 | 16954 | 17244 | 1.58 | 5.22E-02 | transcription_start_site | - | 16873 | 16873 | -226  | 19623 | AN4668 |
| 1511 | CONTIG80 | 16954 | 17244 | 1.58 | 5.22E-02 | transcription_start_site | - | 16760 | 16760 | -339  | 19624 | AN4668 |
| 1511 | CONTIG80 | 16954 | 17244 | 1.58 | 5.22E-02 | transcription_start_site | - | 16656 | 16656 | -443  | 19625 | AN4668 |
| 1511 | CONTIG80 | 16954 | 17244 | 1.58 | 5.22E-02 | transcription_start_site | - | 16448 | 16448 | -651  | 19626 | AN4668 |
| 1511 | CONTIG80 | 16954 | 17244 | 1.58 | 5.22E-02 | transcription_start_site | - | 16341 | 16341 | -758  | 19627 | AN4668 |
| 1511 | CONTIG80 | 16954 | 17244 | 1.58 | 5.22E-02 | transcription_start_site | - | 16133 | 16133 | -966  | 19628 | AN4668 |
| 1511 | CONTIG80 | 16954 | 17244 | 1.58 | 5.22E-02 | transcription_start_site | - | 15566 | 15566 | -1533 | 19629 | AN4668 |
| 226  | CONTIG80 | 32939 | 33509 | 2.89 | 0.00E+00 | transcription_start_site | - | 29515 | 29515 | -3709 | 19644 | AN4673 |
| 226  | CONTIG80 | 32939 | 33509 | 2.89 | 0.00E+00 | transcription_start_site | - | 28929 | 28929 | -4295 | 19645 | AN4673 |
| 226  | CONTIG80 | 32939 | 33509 | 2.89 | 0.00E+00 | transcription_start_site | - | 28397 | 28397 | -4827 | 19646 | AN4673 |
| 226  | CONTIG80 | 32939 | 33509 | 2.89 | 0.00E+00 | transcription_start_site | - | 31664 | 31664 | -1560 | 19647 | AN4674 |
| 226  | CONTIG80 | 32939 | 33509 | 2.89 | 0.00E+00 | transcription_start_site | - | 31495 | 31495 | -1729 | 19648 | AN4674 |
| 226  | CONTIG80 | 32939 | 33509 | 2.89 | 0.00E+00 | transcription_start_site | - | 31156 | 31156 | -2068 | 19649 | AN4674 |
| 226  | CONTIG80 | 32939 | 33509 | 2.89 | 0.00E+00 | transcription_start_site | - | 30614 | 30614 | -2610 | 19650 | AN4674 |
| 1126 | CONTIG80 | 35402 | 35826 | 1.81 | 2.12E-02 | transcription_start_site | - | 31664 | 31664 | -3950 | 19647 | AN4674 |
| 1126 | CONTIG80 | 35402 | 35826 | 1.81 | 2.12E-02 | transcription_start_site | - | 31495 | 31495 | -4119 | 19648 | AN4674 |
| 1126 | CONTIG80 | 35402 | 35826 | 1.81 | 2.12E-02 | transcription_start_site | - | 31156 | 31156 | -4458 | 19649 | AN4674 |
| 1126 | CONTIG80 | 35402 | 35826 | 1.81 | 2.12E-02 | transcription_start_site | - | 30614 | 30614 | -5000 | 19650 | AN4674 |
| 226  | CONTIG80 | 32939 | 33509 | 2.89 | 0.00E+00 | transcription_start_site | + | 32486 | 32486 | 738   | 19652 | AN4675 |
| 226  | CONTIG80 | 32939 | 33509 | 2.89 | 0.00E+00 | transcription_start_site | + | 32122 | 32122 | 1102  | 19651 | AN4675 |
| 1126 | CONTIG80 | 35402 | 35826 | 1.81 | 2.12E-02 | transcription_start_site | - | 36432 | 36432 | 818   | 19656 | AN4676 |
| 2180 | CONTIG80 | 44042 | 45216 | 1.3  | 6.32E-02 | transcription_start_site | - | 41021 | 41021 | -3608 | 19657 | AN4677 |
| 2180 | CONTIG80 | 44042 | 45216 | 1.3  | 6.32E-02 | transcription_start_site | - | 40823 | 40823 | -3806 | 19658 | AN4677 |
| 47   | CONTIG80 | 46142 | 46551 | 3.44 | 0.00E+00 | transcription_start_site | - | 44387 | 44387 | -1959 | 19659 | AN4678 |
| 657  | CONTIG80 | 47107 | 47766 | 2.23 | 1.22E-03 | transcription_start_site | - | 44387 | 44387 | -3049 | 19659 | AN4678 |
| 2180 | CONTIG80 | 44042 | 45216 | 1.3  | 6.32E-02 | transcription_start_site | - | 44387 | 44387 | -242  | 19659 | AN4678 |
| 47   | CONTIG80 | 46142 | 46551 | 3.44 | 0.00E+00 | transcription_start_site | + | 48283 | 48283 | -1936 | 19660 | AN4680 |
| 47   | CONTIG80 | 46142 | 46551 | 3.44 | 0.00E+00 | transcription_start_site | + | 48504 | 48504 | -2157 | 19661 | AN4680 |
| 47   | CONTIG80 | 46142 | 46551 | 3.44 | 0.00E+00 | transcription_start_site | + | 48607 | 48607 | -2260 | 19662 | AN4680 |
| 657  | CONTIG80 | 47107 | 47766 | 2.23 | 1.22E-03 | transcription_start_site | + | 48283 | 48283 | -846  | 19660 | AN4680 |
| 657  | CONTIG80 | 47107 | 47766 | 2.23 | 1.22E-03 | transcription_start_site | + | 48504 | 48504 | -1067 | 19661 | AN4680 |
| 657  | CONTIG80 | 47107 | 47766 | 2.23 | 1.22E-03 | transcription_start_site | + | 48607 | 48607 | -1170 | 19662 | AN4680 |
| 2180 | CONTIG80 | 44042 | 45216 | 1.3  | 6.32E-02 | transcription_start_site | + | 48283 | 48283 | -3654 | 19660 | AN4680 |
| 2180 | CONTIG80 | 44042 | 45216 | 1.3  | 6.32E-02 | transcription_start_site | + | 48504 | 48504 | -3875 | 19661 | AN4680 |
| 2180 | CONTIG80 | 44042 | 45216 | 1.3  | 6.32E-02 | transcription_start_site | + | 48607 | 48607 | -3978 | 19662 | AN4680 |
| 47   | CONTIG80 | 46142 | 46551 | 3.44 | 0.00E+00 | transcription_start_site | + | 50646 | 50646 | -4299 | 19663 | AN4681 |
| 47   | CONTIG80 | 46142 | 46551 | 3.44 | 0.00E+00 | transcription_start_site | + | 50760 | 50760 | -4413 | 19664 | AN4681 |
| 657  | CONTIG80 | 47107 | 47766 | 2.23 | 1.22E-03 | transcription_start_site | + | 50646 | 50646 | -3209 | 19663 | AN4681 |
| 657  | CONTIG80 | 47107 | 47766 | 2.23 | 1.22E-03 | transcription_start_site | + | 50760 | 50760 | -3323 | 19664 | AN4681 |
| 2063 | CONTIG80 | 53114 | 53388 | 1.35 | 1.08E-01 | transcription_start_site | - | 53134 | 53134 | -117  | 19665 | AN4682 |
| 2063 | CONTIG80 | 53114 | 53388 | 1.35 | 1.08E-01 | transcription_start_site | - | 52859 | 52859 | -392  | 19666 | AN4682 |
| 2063 | CONTIG80 | 53114 | 53388 | 1.35 | 1.08E-01 | transcription_start_site | + | 53558 | 53558 | -307  | 19667 | AN4683 |
| 2063 | CONTIG80 | 53114 | 53388 | 1.35 | 1.08E-01 | transcription_start_site | + | 53761 | 53761 | -510  | 19668 | AN4683 |
| 2063 | CONTIG80 | 53114 | 53388 | 1.35 | 1.08E-01 | transcription_start_site | + | 53925 | 53925 | -674  | 19669 | AN4683 |
| 2063 | CONTIG80 | 53114 | 53388 | 1.35 | 1.08E-01 | transcription_start_site | + | 54671 | 54671 | -1420 | 19670 | AN4683 |
| 2063 | CONTIG80 | 53114 | 53388 | 1.35 | 1.08E-01 | transcription_start_site | + | 56283 | 56283 | -3032 | 19671 | AN4684 |
| 2063 | CONTIG80 | 53114 | 53388 | 1.35 | 1.08E-01 | transcription_start_site | + | 56453 | 56453 | -3202 | 19672 | AN4684 |
| 1728 | CONTIG80 | 58964 | 59305 | 1.49 | 6.84E-02 | transcription_start_site | + | 59718 | 59718 | -583  | 19673 | AN4685 |
| 1728 | CONTIG80 | 58964 | 59305 | 1.49 | 6.84E-02 | transcription_start_site | + | 59809 | 59809 | -674  | 19674 | AN4685 |
| 1728 | CONTIG80 | 58964 | 59305 | 1.49 | 6.84E-02 | transcription_start_site | + | 59912 | 59912 | -777  | 19675 | AN4685 |
| 1728 | CONTIG80 | 58964 | 59305 | 1.49 | 6.84E-02 | transcription_start_site | + | 60019 | 60019 | -884  | 19676 | AN4685 |
| 1728 | CONTIG80 | 58964 | 59305 | 1.49 | 6.84E-02 | transcription_start_site | + | 60150 | 60150 | -1015 | 19677 | AN4685 |
| 1728 | CONTIG80 | 58964 | 59305 | 1.49 | 6.84E-02 | transcription_start_site | + | 60238 | 60238 | -1103 | 19678 | AN4685 |
| 1728 | CONTIG80 | 58964 | 59305 | 1.49 | 6.84E-02 | transcription_start_site | + | 60424 | 60424 | -1289 | 19679 | AN4685 |
| 1728 | CONTIG80 | 58964 | 59305 | 1.49 | 6.84E-02 | transcription_start_site | + | 62199 | 62199 | -3064 | 19680 | AN4686 |
| 1927 | CONTIG80 | 73669 | 73943 | 1.4  | 9.24E-02 | transcription_start_site | - | 69027 | 69027 | -4779 | 19689 | AN4689 |
| 1927 | CONTIG80 | 73669 | 73943 | 1.4  | 9.24E-02 | transcription_start_site | - | 68875 | 68875 | -4931 | 19690 | AN4689 |

|               |        |        |      |          |                          |   |        |        |       |       |        |
|---------------|--------|--------|------|----------|--------------------------|---|--------|--------|-------|-------|--------|
| 1927 CONTIG80 | 73669  | 73943  | 1.4  | 9.24E-02 | transcription_start_site | + | 74482  | 74482  | -676  | 19696 | AN4691 |
| 1927 CONTIG80 | 73669  | 73943  | 1.4  | 9.24E-02 | transcription_start_site | + | 74932  | 74932  | -1126 | 19697 | AN4691 |
| 1927 CONTIG80 | 73669  | 73943  | 1.4  | 9.24E-02 | transcription_start_site | + | 75097  | 75097  | -1291 | 19698 | AN4691 |
| 1927 CONTIG80 | 73669  | 73943  | 1.4  | 9.24E-02 | transcription_start_site | + | 75587  | 75587  | -1781 | 19699 | AN4691 |
| 1927 CONTIG80 | 73669  | 73943  | 1.4  | 9.24E-02 | transcription_start_site | + | 78760  | 78760  | -4954 | 19700 | AN4692 |
| 1927 CONTIG80 | 73669  | 73943  | 1.4  | 9.24E-02 | transcription_start_site | + | 78937  | 78937  | -5131 | 19701 | AN4692 |
| 2064 CONTIG80 | 77719  | 78203  | 1.35 | 1.08E-01 | transcription_start_site | + | 78760  | 78760  | -799  | 19700 | AN4692 |
| 2064 CONTIG80 | 77719  | 78203  | 1.35 | 1.08E-01 | transcription_start_site | + | 78937  | 78937  | -976  | 19701 | AN4692 |
| 2064 CONTIG80 | 77719  | 78203  | 1.35 | 1.08E-01 | transcription_start_site | + | 79864  | 79864  | -1903 | 19702 | AN4692 |
| 658 CONTIG80  | 93153  | 93526  | 2.23 | 1.22E-03 | transcription_start_site | - | 90854  | 90854  | -2485 | 19706 | AN4695 |
| 658 CONTIG80  | 93153  | 93526  | 2.23 | 1.22E-03 | transcription_start_site | - | 90700  | 90700  | -2639 | 19707 | AN4695 |
| 1313 CONTIG80 | 101628 | 102067 | 1.68 | 2.18E-02 | transcription_start_site | - | 98542  | 98542  | -3305 | 19708 | AN4696 |
| 1313 CONTIG80 | 101628 | 102067 | 1.68 | 2.18E-02 | transcription_start_site | - | 98417  | 98417  | -3430 | 19709 | AN4696 |
| 2065 CONTIG80 | 97363  | 97627  | 1.35 | 1.08E-01 | transcription_start_site | - | 98417  | 98417  | 922   | 19709 | AN4696 |
| 2065 CONTIG80 | 97363  | 97627  | 1.35 | 1.08E-01 | transcription_start_site | - | 98542  | 98542  | 1047  | 19708 | AN4696 |
| 2201 CONTIG80 | 98118  | 98462  | 1.3  | 1.25E-01 | transcription_start_site | - | 98417  | 98417  | 127   | 19709 | AN4696 |
| 2201 CONTIG80 | 98118  | 98462  | 1.3  | 1.25E-01 | transcription_start_site | - | 98542  | 98542  | 252   | 19708 | AN4696 |
| 1189 CONTIG80 | 105612 | 106041 | 1.77 | 2.62E-02 | transcription_start_site | - | 101522 | 101522 | -4304 | 19710 | AN4697 |
| 1189 CONTIG80 | 105612 | 106041 | 1.77 | 2.62E-02 | transcription_start_site | - | 101361 | 101361 | -4465 | 19711 | AN4697 |
| 1189 CONTIG80 | 105612 | 106041 | 1.77 | 2.62E-02 | transcription_start_site | - | 100813 | 100813 | -5013 | 19712 | AN4697 |
| 1313 CONTIG80 | 101628 | 102067 | 1.68 | 2.18E-02 | transcription_start_site | - | 101522 | 101522 | -325  | 19710 | AN4697 |
| 1313 CONTIG80 | 101628 | 102067 | 1.68 | 2.18E-02 | transcription_start_site | - | 101361 | 101361 | -486  | 19711 | AN4697 |
| 1313 CONTIG80 | 101628 | 102067 | 1.68 | 2.18E-02 | transcription_start_site | - | 100813 | 100813 | -1034 | 19712 | AN4697 |
| 1313 CONTIG80 | 101628 | 102067 | 1.68 | 2.18E-02 | transcription_start_site | - | 100511 | 100511 | -1336 | 19713 | AN4697 |
| 76 CONTIG80   | 109733 | 110017 | 3.3  | 0.00E+00 | transcription_start_site | + | 110463 | 110463 | -588  | 19714 | AN4698 |
| 76 CONTIG80   | 109733 | 110017 | 3.3  | 0.00E+00 | transcription_start_site | + | 112214 | 112214 | -2339 | 19715 | AN4698 |
| 1189 CONTIG80 | 105612 | 106041 | 1.77 | 2.62E-02 | transcription_start_site | + | 110463 | 110463 | -4636 | 19714 | AN4698 |
| 483 CONTIG80  | 119930 | 120279 | 2.47 | 1.54E-03 | transcription_start_site | + | 123054 | 123054 | -2949 | 19716 | AN4699 |
| 483 CONTIG80  | 119930 | 120279 | 2.47 | 1.54E-03 | transcription_start_site | + | 124439 | 124439 | -4334 | 19717 | AN4699 |
| 483 CONTIG80  | 119930 | 120279 | 2.47 | 1.54E-03 | transcription_start_site | + | 125253 | 125253 | -5148 | 19718 | AN4699 |
| 763 CONTIG80  | 122483 | 123432 | 2.14 | 6.61E-03 | transcription_start_site | + | 123054 | 123054 | -96   | 19716 | AN4699 |
| 763 CONTIG80  | 122483 | 123432 | 2.14 | 6.61E-03 | transcription_start_site | + | 124439 | 124439 | -1481 | 19717 | AN4699 |
| 763 CONTIG80  | 122483 | 123432 | 2.14 | 6.61E-03 | transcription_start_site | + | 125253 | 125253 | -2295 | 19718 | AN4699 |
| 164 CONTIG80  | 126688 | 127102 | 3.02 | 0.00E+00 | transcription_start_site | + | 127282 | 127282 | -387  | 19719 | AN4700 |
| 164 CONTIG80  | 126688 | 127102 | 3.02 | 0.00E+00 | transcription_start_site | + | 129159 | 129159 | -2264 | 19720 | AN4700 |
| 763 CONTIG80  | 122483 | 123432 | 2.14 | 6.61E-03 | transcription_start_site | + | 127282 | 127282 | -4324 | 19719 | AN4700 |
| 164 CONTIG80  | 126688 | 127102 | 3.02 | 0.00E+00 | transcription_start_site | + | 132013 | 132013 | -5118 | 19723 | AN4702 |
| 665 CONTIG80  | 172584 | 173608 | 2.23 | 4.61E-03 | transcription_start_site | - | 173402 | 173402 | 306   | 19754 | AN4713 |
| 665 CONTIG80  | 172584 | 173608 | 2.23 | 4.61E-03 | transcription_start_site | - | 172762 | 172762 | -334  | 19755 | AN4713 |
| 1596 CONTIG80 | 177014 | 177503 | 1.54 | 3.99E-02 | transcription_start_site | - | 173402 | 173402 | -3856 | 19754 | AN4713 |
| 1596 CONTIG80 | 177014 | 177503 | 1.54 | 3.99E-02 | transcription_start_site | - | 172762 | 172762 | -4496 | 19755 | AN4713 |
| 1596 CONTIG80 | 177014 | 177503 | 1.54 | 3.99E-02 | transcription_start_site | - | 175467 | 175467 | -1791 | 19756 | AN4714 |
| 1596 CONTIG80 | 177014 | 177503 | 1.54 | 3.99E-02 | transcription_start_site | - | 175115 | 175115 | -2143 | 19757 | AN4714 |
| 665 CONTIG80  | 172584 | 173608 | 2.23 | 4.61E-03 | transcription_start_site | + | 175617 | 175617 | -2521 | 19758 | AN4715 |
| 665 CONTIG80  | 172584 | 173608 | 2.23 | 4.61E-03 | transcription_start_site | + | 175918 | 175918 | -2822 | 19759 | AN4715 |
| 665 CONTIG80  | 172584 | 173608 | 2.23 | 4.61E-03 | transcription_start_site | + | 178020 | 178020 | -4924 | 19760 | AN4716 |
| 1596 CONTIG80 | 177014 | 177503 | 1.54 | 3.99E-02 | transcription_start_site | + | 178020 | 178020 | -761  | 19760 | AN4716 |
| 1596 CONTIG80 | 177014 | 177503 | 1.54 | 3.99E-02 | transcription_start_site | + | 179133 | 179133 | -1874 | 19761 | AN4716 |
| 2202 CONTIG80 | 184504 | 185009 | 1.3  | 1.25E-01 | transcription_start_site | - | 182441 | 182441 | -2315 | 19762 | AN4717 |
| 2202 CONTIG80 | 184504 | 185009 | 1.3  | 1.25E-01 | transcription_start_site | - | 182126 | 182126 | -2630 | 19763 | AN4717 |
| 2202 CONTIG80 | 184504 | 185009 | 1.3  | 1.25E-01 | transcription_start_site | - | 181969 | 181969 | -2787 | 19764 | AN4717 |
| 2202 CONTIG80 | 184504 | 185009 | 1.3  | 1.25E-01 | transcription_start_site | - | 181790 | 181790 | -2966 | 19765 | AN4717 |
| 2202 CONTIG80 | 184504 | 185009 | 1.3  | 1.25E-01 | transcription_start_site | - | 184406 | 184406 | -350  | 19766 | AN4718 |
| 2202 CONTIG80 | 184504 | 185009 | 1.3  | 1.25E-01 | transcription_start_site | - | 184069 | 184069 | -687  | 19767 | AN4718 |
| 2202 CONTIG80 | 184504 | 185009 | 1.3  | 1.25E-01 | transcription_start_site | - | 183871 | 183871 | -885  | 19768 | AN4718 |
| 2202 CONTIG80 | 184504 | 185009 | 1.3  | 1.25E-01 | transcription_start_site | - | 183762 | 183762 | -994  | 19769 | AN4718 |
| 2202 CONTIG80 | 184504 | 185009 | 1.3  | 1.25E-01 | transcription_start_site | - | 183578 | 183578 | -1178 | 19770 | AN4718 |

|      |          |        |        |      |          |                          |   |        |        |       |       |        |
|------|----------|--------|--------|------|----------|--------------------------|---|--------|--------|-------|-------|--------|
| 2202 | CONTIG80 | 184504 | 185009 | 1.3  | 1.25E-01 | transcription_start_site | - | 183410 | 183410 | -1346 | 19771 | AN4718 |
| 2202 | CONTIG80 | 184504 | 185009 | 1.3  | 1.25E-01 | transcription_start_site | - | 183272 | 183272 | -1484 | 19772 | AN4718 |
| 2202 | CONTIG80 | 184504 | 185009 | 1.3  | 1.25E-01 | transcription_start_site | - | 183133 | 183133 | -1623 | 19773 | AN4718 |
| 2202 | CONTIG80 | 184504 | 185009 | 1.3  | 1.25E-01 | transcription_start_site | + | 184883 | 184883 | -126  | 19774 | AN4719 |
| 2202 | CONTIG80 | 184504 | 185009 | 1.3  | 1.25E-01 | transcription_start_site | + | 187583 | 187583 | -2826 | 19775 | AN4719 |
| 2202 | CONTIG80 | 184504 | 185009 | 1.3  | 1.25E-01 | transcription_start_site | + | 188065 | 188065 | -3308 | 19776 | AN4719 |
| 2202 | CONTIG80 | 184504 | 185009 | 1.3  | 1.25E-01 | transcription_start_site | + | 188545 | 188545 | -3788 | 19777 | AN4719 |
| 56   | CONTIG80 | 191860 | 192134 | 3.4  | 0.00E+00 | transcription_start_site | - | 191056 | 191056 | -941  | 19778 | AN4720 |
| 56   | CONTIG80 | 191860 | 192134 | 3.4  | 0.00E+00 | transcription_start_site | - | 190843 | 190843 | -1154 | 19779 | AN4720 |
| 56   | CONTIG80 | 191860 | 192134 | 3.4  | 0.00E+00 | transcription_start_site | - | 190352 | 190352 | -1645 | 19780 | AN4720 |
| 1403 | CONTIG80 | 213093 | 213502 | 1.63 | 4.36E-02 | transcription_start_site | - | 209998 | 209998 | -3299 | 19793 | AN4725 |
| 1729 | CONTIG80 | 214435 | 214929 | 1.49 | 6.84E-02 | transcription_start_site | - | 209998 | 209998 | -4684 | 19793 | AN4725 |
| 1403 | CONTIG80 | 213093 | 213502 | 1.63 | 4.36E-02 | transcription_start_site | - | 213105 | 213105 | -192  | 19796 | AN4727 |
| 1403 | CONTIG80 | 213093 | 213502 | 1.63 | 4.36E-02 | transcription_start_site | - | 213026 | 213026 | -271  | 19797 | AN4727 |
| 1403 | CONTIG80 | 213093 | 213502 | 1.63 | 4.36E-02 | transcription_start_site | - | 212729 | 212729 | -568  | 19798 | AN4727 |
| 1403 | CONTIG80 | 213093 | 213502 | 1.63 | 4.36E-02 | transcription_start_site | - | 212217 | 212217 | -1080 | 19799 | AN4727 |
| 1729 | CONTIG80 | 214435 | 214929 | 1.49 | 6.84E-02 | transcription_start_site | - | 213105 | 213105 | -1577 | 19796 | AN4727 |
| 1729 | CONTIG80 | 214435 | 214929 | 1.49 | 6.84E-02 | transcription_start_site | - | 213026 | 213026 | -1656 | 19797 | AN4727 |
| 1729 | CONTIG80 | 214435 | 214929 | 1.49 | 6.84E-02 | transcription_start_site | - | 212729 | 212729 | -1953 | 19798 | AN4727 |
| 1729 | CONTIG80 | 214435 | 214929 | 1.49 | 6.84E-02 | transcription_start_site | - | 212217 | 212217 | -2465 | 19799 | AN4727 |
| 1403 | CONTIG80 | 213093 | 213502 | 1.63 | 4.36E-02 | transcription_start_site | - | 214035 | 214035 | 737   | 19803 | AN4728 |
| 1729 | CONTIG80 | 214435 | 214929 | 1.49 | 6.84E-02 | transcription_start_site | - | 214773 | 214773 | 91    | 19802 | AN4728 |
| 1729 | CONTIG80 | 214435 | 214929 | 1.49 | 6.84E-02 | transcription_start_site | - | 214035 | 214035 | -647  | 19803 | AN4728 |
| 2339 | CONTIG80 | 220729 | 221543 | 1.26 | 1.28E-01 | transcription_start_site | - | 216877 | 216877 | -4259 | 19800 | AN4728 |
| 2339 | CONTIG80 | 220729 | 221543 | 1.26 | 1.28E-01 | transcription_start_site | - | 216272 | 216272 | -4864 | 19801 | AN4728 |
| 2339 | CONTIG80 | 220729 | 221543 | 1.26 | 1.28E-01 | transcription_start_site | - | 218579 | 218579 | -2557 | 19804 | AN4729 |
| 2339 | CONTIG80 | 220729 | 221543 | 1.26 | 1.28E-01 | transcription_start_site | - | 218266 | 218266 | -2870 | 19805 | AN4729 |
| 2339 | CONTIG80 | 220729 | 221543 | 1.26 | 1.28E-01 | transcription_start_site | - | 220642 | 220642 | -494  | 19806 | AN4730 |
| 2339 | CONTIG80 | 220729 | 221543 | 1.26 | 1.28E-01 | transcription_start_site | - | 220413 | 220413 | -723  | 19807 | AN4730 |
| 2339 | CONTIG80 | 220729 | 221543 | 1.26 | 1.28E-01 | transcription_start_site | - | 220238 | 220238 | -898  | 19808 | AN4730 |
| 2339 | CONTIG80 | 220729 | 221543 | 1.26 | 1.28E-01 | transcription_start_site | + | 221268 | 221268 | -132  | 19809 | AN4731 |
| 2339 | CONTIG80 | 220729 | 221543 | 1.26 | 1.28E-01 | transcription_start_site | + | 221341 | 221341 | -205  | 19810 | AN4731 |
| 2339 | CONTIG80 | 220729 | 221543 | 1.26 | 1.28E-01 | transcription_start_site | + | 221851 | 221851 | -715  | 19811 | AN4731 |
| 1316 | CONTIG80 | 225769 | 226105 | 1.68 | 3.70E-02 | transcription_start_site | - | 223794 | 223794 | -2143 | 19812 | AN4732 |
| 1316 | CONTIG80 | 225769 | 226105 | 1.68 | 3.70E-02 | transcription_start_site | - | 223220 | 223220 | -2717 | 19813 | AN4732 |
| 1316 | CONTIG80 | 225769 | 226105 | 1.68 | 3.70E-02 | transcription_start_site | - | 223079 | 223079 | -2858 | 19814 | AN4732 |
| 1316 | CONTIG80 | 225769 | 226105 | 1.68 | 3.70E-02 | transcription_start_site | + | 226461 | 226461 | -524  | 19815 | AN4733 |
| 1316 | CONTIG80 | 225769 | 226105 | 1.68 | 3.70E-02 | transcription_start_site | + | 226542 | 226542 | -605  | 19816 | AN4733 |
| 1316 | CONTIG80 | 225769 | 226105 | 1.68 | 3.70E-02 | transcription_start_site | + | 226664 | 226664 | -727  | 19817 | AN4733 |
| 1316 | CONTIG80 | 225769 | 226105 | 1.68 | 3.70E-02 | transcription_start_site | + | 228215 | 228215 | -2278 | 19818 | AN4733 |
| 1316 | CONTIG80 | 225769 | 226105 | 1.68 | 3.70E-02 | transcription_start_site | + | 228628 | 228628 | -2691 | 19819 | AN4733 |
| 1316 | CONTIG80 | 225769 | 226105 | 1.68 | 3.70E-02 | transcription_start_site | + | 228802 | 228802 | -2865 | 19820 | AN4733 |
| 2339 | CONTIG80 | 220729 | 221543 | 1.26 | 1.28E-01 | transcription_start_site | + | 226461 | 226461 | -5325 | 19815 | AN4733 |
| 2339 | CONTIG80 | 220729 | 221543 | 1.26 | 1.28E-01 | transcription_start_site | + | 226542 | 226542 | -5406 | 19816 | AN4733 |
| 1316 | CONTIG80 | 225769 | 226105 | 1.68 | 3.70E-02 | transcription_start_site | + | 230913 | 230913 | -4976 | 19821 | AN4734 |
| 1184 | CONTIG80 | 263932 | 264426 | 1.77 | 1.44E-02 | transcription_start_site | - | 260156 | 260156 | -4023 | 19862 | AN4743 |
| 1184 | CONTIG80 | 263932 | 264426 | 1.77 | 1.44E-02 | transcription_start_site | - | 260056 | 260056 | -4123 | 19863 | AN4743 |
| 1184 | CONTIG80 | 263932 | 264426 | 1.77 | 1.44E-02 | transcription_start_site | - | 259961 | 259961 | -4218 | 19864 | AN4743 |
| 1184 | CONTIG80 | 263932 | 264426 | 1.77 | 1.44E-02 | transcription_start_site | - | 259839 | 259839 | -4340 | 19865 | AN4743 |
| 1184 | CONTIG80 | 263932 | 264426 | 1.77 | 1.44E-02 | transcription_start_site | - | 259584 | 259584 | -4595 | 19866 | AN4743 |
| 1184 | CONTIG80 | 263932 | 264426 | 1.77 | 1.44E-02 | transcription_start_site | - | 259292 | 259292 | -4887 | 19867 | AN4743 |
| 2340 | CONTIG80 | 260795 | 261144 | 1.26 | 1.28E-01 | transcription_start_site | - | 260156 | 260156 | -813  | 19862 | AN4743 |
| 2340 | CONTIG80 | 260795 | 261144 | 1.26 | 1.28E-01 | transcription_start_site | - | 260056 | 260056 | -913  | 19863 | AN4743 |
| 2340 | CONTIG80 | 260795 | 261144 | 1.26 | 1.28E-01 | transcription_start_site | - | 259961 | 259961 | -1008 | 19864 | AN4743 |
| 2340 | CONTIG80 | 260795 | 261144 | 1.26 | 1.28E-01 | transcription_start_site | - | 259839 | 259839 | -1130 | 19865 | AN4743 |
| 2340 | CONTIG80 | 260795 | 261144 | 1.26 | 1.28E-01 | transcription_start_site | - | 259584 | 259584 | -1385 | 19866 | AN4743 |
| 2340 | CONTIG80 | 260795 | 261144 | 1.26 | 1.28E-01 | transcription_start_site | - | 259292 | 259292 | -1677 | 19867 | AN4743 |

|               |        |        |      |          |                          |   |        |        |       |              |
|---------------|--------|--------|------|----------|--------------------------|---|--------|--------|-------|--------------|
| 1184 CONTIG80 | 263932 | 264426 | 1.77 | 1.44E-02 | transcription_start_site | - | 263799 | 263799 | -380  | 19868 AN4744 |
| 1184 CONTIG80 | 263932 | 264426 | 1.77 | 1.44E-02 | transcription_start_site | - | 263397 | 263397 | -782  | 19869 AN4744 |
| 1184 CONTIG80 | 263932 | 264426 | 1.77 | 1.44E-02 | transcription_start_site | - | 263231 | 263231 | -948  | 19870 AN4744 |
| 1184 CONTIG80 | 263932 | 264426 | 1.77 | 1.44E-02 | transcription_start_site | - | 263041 | 263041 | -1138 | 19871 AN4744 |
| 1184 CONTIG80 | 263932 | 264426 | 1.77 | 1.44E-02 | transcription_start_site | - | 262671 | 262671 | -1508 | 19872 AN4744 |
| 1184 CONTIG80 | 263932 | 264426 | 1.77 | 1.44E-02 | transcription_start_site | - | 262377 | 262377 | -1802 | 19873 AN4744 |
| 1184 CONTIG80 | 263932 | 264426 | 1.77 | 1.44E-02 | transcription_start_site | - | 261994 | 261994 | -2185 | 19874 AN4744 |
| 2340 CONTIG80 | 260795 | 261144 | 1.26 | 1.28E-01 | transcription_start_site | - | 261994 | 261994 | 1024  | 19874 AN4744 |
| 1184 CONTIG80 | 263932 | 264426 | 1.77 | 1.44E-02 | transcription_start_site | + | 264399 | 264399 | -220  | 19875 AN4745 |
| 1184 CONTIG80 | 263932 | 264426 | 1.77 | 1.44E-02 | transcription_start_site | + | 264648 | 264648 | -469  | 19876 AN4745 |
| 1184 CONTIG80 | 263932 | 264426 | 1.77 | 1.44E-02 | transcription_start_site | + | 264775 | 264775 | -596  | 19877 AN4745 |
| 1184 CONTIG80 | 263932 | 264426 | 1.77 | 1.44E-02 | transcription_start_site | + | 265433 | 265433 | -1254 | 19878 AN4745 |
| 1184 CONTIG80 | 263932 | 264426 | 1.77 | 1.44E-02 | transcription_start_site | + | 265688 | 265688 | -1509 | 19879 AN4745 |
| 1184 CONTIG80 | 263932 | 264426 | 1.77 | 1.44E-02 | transcription_start_site | + | 266266 | 266266 | -2087 | 19880 AN4745 |
| 1184 CONTIG80 | 263932 | 264426 | 1.77 | 1.44E-02 | transcription_start_site | + | 266465 | 266465 | -2286 | 19881 AN4745 |
| 1184 CONTIG80 | 263932 | 264426 | 1.77 | 1.44E-02 | transcription_start_site | + | 266614 | 266614 | -2435 | 19882 AN4745 |
| 1184 CONTIG80 | 263932 | 264426 | 1.77 | 1.44E-02 | transcription_start_site | + | 266734 | 266734 | -2555 | 19883 AN4745 |
| 2340 CONTIG80 | 260795 | 261144 | 1.26 | 1.28E-01 | transcription_start_site | + | 264399 | 264399 | -3429 | 19875 AN4745 |
| 2340 CONTIG80 | 260795 | 261144 | 1.26 | 1.28E-01 | transcription_start_site | + | 264648 | 264648 | -3678 | 19876 AN4745 |
| 2340 CONTIG80 | 260795 | 261144 | 1.26 | 1.28E-01 | transcription_start_site | + | 264775 | 264775 | -3805 | 19877 AN4745 |
| 2340 CONTIG80 | 260795 | 261144 | 1.26 | 1.28E-01 | transcription_start_site | + | 265433 | 265433 | -4463 | 19878 AN4745 |
| 2340 CONTIG80 | 260795 | 261144 | 1.26 | 1.28E-01 | transcription_start_site | + | 265688 | 265688 | -4718 | 19879 AN4745 |
| 1184 CONTIG80 | 263932 | 264426 | 1.77 | 1.44E-02 | transcription_start_site | + | 269262 | 269262 | -5083 | 19887 AN4747 |
| 2496 CONTIG80 | 287927 | 288292 | 1.21 | 1.66E-01 | transcription_start_site | - | 285359 | 285359 | -2750 | 19910 AN4753 |
| 2496 CONTIG80 | 287927 | 288292 | 1.21 | 1.66E-01 | transcription_start_site | - | 285045 | 285045 | -3064 | 19911 AN4753 |
| 2496 CONTIG80 | 287927 | 288292 | 1.21 | 1.66E-01 | transcription_start_site | - | 284477 | 284477 | -3632 | 19912 AN4753 |
| 2496 CONTIG80 | 287927 | 288292 | 1.21 | 1.66E-01 | transcription_start_site | - | 284306 | 284306 | -3803 | 19913 AN4753 |
| 2496 CONTIG80 | 287927 | 288292 | 1.21 | 1.66E-01 | transcription_start_site | + | 287177 | 287177 | 932   | 19918 AN4754 |
| 2496 CONTIG80 | 287927 | 288292 | 1.21 | 1.66E-01 | transcription_start_site | - | 288182 | 288182 | 72    | 19919 AN4755 |
| 2496 CONTIG80 | 287927 | 288292 | 1.21 | 1.66E-01 | transcription_start_site | - | 287831 | 287831 | -278  | 19920 AN4755 |
| 2496 CONTIG80 | 287927 | 288292 | 1.21 | 1.66E-01 | transcription_start_site | - | 287503 | 287503 | -606  | 19921 AN4755 |
| 2496 CONTIG80 | 287927 | 288292 | 1.21 | 1.66E-01 | transcription_start_site | + | 293154 | 293154 | -5044 | 19922 AN4757 |
| 2057 CONTIG80 | 295363 | 296007 | 1.35 | 8.36E-02 | transcription_start_site | - | 295029 | 295029 | -656  | 19924 AN4758 |
| 2057 CONTIG80 | 295363 | 296007 | 1.35 | 8.36E-02 | transcription_start_site | - | 294922 | 294922 | -763  | 19925 AN4758 |
| 2057 CONTIG80 | 295363 | 296007 | 1.35 | 8.36E-02 | transcription_start_site | - | 294769 | 294769 | -916  | 19926 AN4758 |
| 2057 CONTIG80 | 295363 | 296007 | 1.35 | 8.36E-02 | transcription_start_site | - | 294724 | 294724 | -961  | 19927 AN4758 |
| 2497 CONTIG80 | 299626 | 299910 | 1.21 | 1.66E-01 | transcription_start_site | - | 295029 | 295029 | -4739 | 19924 AN4758 |
| 2497 CONTIG80 | 299626 | 299910 | 1.21 | 1.66E-01 | transcription_start_site | - | 294922 | 294922 | -4846 | 19925 AN4758 |
| 2497 CONTIG80 | 299626 | 299910 | 1.21 | 1.66E-01 | transcription_start_site | - | 294769 | 294769 | -4999 | 19926 AN4758 |
| 2497 CONTIG80 | 299626 | 299910 | 1.21 | 1.66E-01 | transcription_start_site | - | 294724 | 294724 | -5044 | 19927 AN4758 |
| 2057 CONTIG80 | 295363 | 296007 | 1.35 | 8.36E-02 | transcription_start_site | + | 296518 | 296518 | -833  | 19928 AN4759 |
| 2057 CONTIG80 | 295363 | 296007 | 1.35 | 8.36E-02 | transcription_start_site | + | 296587 | 296587 | -902  | 19929 AN4759 |
| 2057 CONTIG80 | 295363 | 296007 | 1.35 | 8.36E-02 | transcription_start_site | + | 297259 | 297259 | -1574 | 19930 AN4759 |
| 2497 CONTIG80 | 299626 | 299910 | 1.21 | 1.66E-01 | transcription_start_site | - | 300815 | 300815 | 1047  | 19933 AN4760 |
| 2497 CONTIG80 | 299626 | 299910 | 1.21 | 1.66E-01 | transcription_start_site | + | 301901 | 301901 | -2133 | 19934 AN4761 |
| 2497 CONTIG80 | 299626 | 299910 | 1.21 | 1.66E-01 | transcription_start_site | + | 302217 | 302217 | -2449 | 19935 AN4761 |
| 2497 CONTIG80 | 299626 | 299910 | 1.21 | 1.66E-01 | transcription_start_site | + | 302559 | 302559 | -2791 | 19936 AN4761 |
| 2497 CONTIG80 | 299626 | 299910 | 1.21 | 1.66E-01 | transcription_start_site | + | 302901 | 302901 | -3133 | 19937 AN4761 |
| 2497 CONTIG80 | 299626 | 299910 | 1.21 | 1.66E-01 | transcription_start_site | + | 304237 | 304237 | -4469 | 19938 AN4761 |
| 2497 CONTIG80 | 299626 | 299910 | 1.21 | 1.66E-01 | transcription_start_site | + | 304429 | 304429 | -4661 | 19939 AN4761 |
| 1404 CONTIG80 | 325896 | 326170 | 1.63 | 4.36E-02 | transcription_start_site | - | 326094 | 326094 | 61    | 19956 AN4768 |
| 764 CONTIG80  | 334276 | 334850 | 2.14 | 6.61E-03 | transcription_start_site | - | 329454 | 329454 | -5109 | 19957 AN4769 |
| 764 CONTIG80  | 334276 | 334850 | 2.14 | 6.61E-03 | transcription_start_site | - | 333487 | 333487 | -1076 | 19963 AN4770 |
| 2723 CONTIG81 | 6376   | 6725   | 1.11 | 1.07E-01 | transcription_start_site | - | 6116   | 6116   | -434  | 19966 AN4772 |
| 2723 CONTIG81 | 6376   | 6725   | 1.11 | 1.07E-01 | transcription_start_site | - | 5746   | 5746   | -804  | 19967 AN4772 |
| 2723 CONTIG81 | 6376   | 6725   | 1.11 | 1.07E-01 | transcription_start_site | - | 5343   | 5343   | -1207 | 19968 AN4772 |
| 2723 CONTIG81 | 6376   | 6725   | 1.11 | 1.07E-01 | transcription_start_site | - | 4990   | 4990   | -1560 | 19969 AN4772 |

|      |          |       |       |      |          |                          |   |       |       |       |       |        |
|------|----------|-------|-------|------|----------|--------------------------|---|-------|-------|-------|-------|--------|
| 2723 | CONTIG81 | 6376  | 6725  | 1.11 | 1.07E-01 | transcription_start_site | - | 4091  | 4091  | -2459 | 19970 | AN4772 |
| 2723 | CONTIG81 | 6376  | 6725  | 1.11 | 1.07E-01 | transcription_start_site | - | 7699  | 7699  | 1148  | 19978 | AN4773 |
| 2525 | CONTIG81 | 15996 | 16490 | 1.19 | 9.24E-02 | transcription_start_site | - | 13030 | 13030 | -3213 | 19979 | AN4774 |
| 2525 | CONTIG81 | 15996 | 16490 | 1.19 | 9.24E-02 | transcription_start_site | - | 12655 | 12655 | -3588 | 19980 | AN4774 |
| 2525 | CONTIG81 | 15996 | 16490 | 1.19 | 9.24E-02 | transcription_start_site | + | 15140 | 15140 | 1103  | 19985 | AN4775 |
| 1572 | CONTIG81 | 21005 | 21359 | 1.55 | 1.06E-02 | transcription_start_site | - | 16821 | 16821 | -4361 | 19986 | AN4776 |
| 1572 | CONTIG81 | 21005 | 21359 | 1.55 | 1.06E-02 | transcription_start_site | - | 16243 | 16243 | -4939 | 19987 | AN4776 |
| 2400 | CONTIG81 | 18095 | 18828 | 1.23 | 5.52E-02 | transcription_start_site | - | 16821 | 16821 | -1640 | 19986 | AN4776 |
| 2400 | CONTIG81 | 18095 | 18828 | 1.23 | 5.52E-02 | transcription_start_site | - | 16243 | 16243 | -2218 | 19987 | AN4776 |
| 2525 | CONTIG81 | 15996 | 16490 | 1.19 | 9.24E-02 | transcription_start_site | - | 16243 | 16243 | 0     | 19987 | AN4776 |
| 2525 | CONTIG81 | 15996 | 16490 | 1.19 | 9.24E-02 | transcription_start_site | - | 16821 | 16821 | 578   | 19986 | AN4776 |
| 1572 | CONTIG81 | 21005 | 21359 | 1.55 | 1.06E-02 | transcription_start_site | - | 18532 | 18532 | -2650 | 19988 | AN4777 |
| 1572 | CONTIG81 | 21005 | 21359 | 1.55 | 1.06E-02 | transcription_start_site | - | 18343 | 18343 | -2839 | 19989 | AN4777 |
| 1572 | CONTIG81 | 21005 | 21359 | 1.55 | 1.06E-02 | transcription_start_site | - | 18214 | 18214 | -2968 | 19990 | AN4777 |
| 2400 | CONTIG81 | 18095 | 18828 | 1.23 | 5.52E-02 | transcription_start_site | - | 18532 | 18532 | 70    | 19988 | AN4777 |
| 2400 | CONTIG81 | 18095 | 18828 | 1.23 | 5.52E-02 | transcription_start_site | - | 18343 | 18343 | -118  | 19989 | AN4777 |
| 2400 | CONTIG81 | 18095 | 18828 | 1.23 | 5.52E-02 | transcription_start_site | - | 18214 | 18214 | -247  | 19990 | AN4777 |
| 1572 | CONTIG81 | 21005 | 21359 | 1.55 | 1.06E-02 | transcription_start_site | - | 20673 | 20673 | -509  | 19991 | AN4778 |
| 1572 | CONTIG81 | 21005 | 21359 | 1.55 | 1.06E-02 | transcription_start_site | - | 20468 | 20468 | -714  | 19992 | AN4778 |
| 1572 | CONTIG81 | 21005 | 21359 | 1.55 | 1.06E-02 | transcription_start_site | - | 20319 | 20319 | -863  | 19993 | AN4778 |
| 1572 | CONTIG81 | 21005 | 21359 | 1.55 | 1.06E-02 | transcription_start_site | - | 20111 | 20111 | -1071 | 19994 | AN4778 |
| 1572 | CONTIG81 | 21005 | 21359 | 1.55 | 1.06E-02 | transcription_start_site | - | 20009 | 20009 | -1173 | 19995 | AN4778 |
| 1572 | CONTIG81 | 21005 | 21359 | 1.55 | 1.06E-02 | transcription_start_site | - | 19860 | 19860 | -1322 | 19996 | AN4778 |
| 1572 | CONTIG81 | 21005 | 21359 | 1.55 | 1.06E-02 | transcription_start_site | - | 19146 | 19146 | -2036 | 19997 | AN4778 |
| 1765 | CONTIG81 | 24005 | 24294 | 1.47 | 3.08E-02 | transcription_start_site | - | 20673 | 20673 | -3476 | 19991 | AN4778 |
| 1765 | CONTIG81 | 24005 | 24294 | 1.47 | 3.08E-02 | transcription_start_site | - | 20468 | 20468 | -3681 | 19992 | AN4778 |
| 1765 | CONTIG81 | 24005 | 24294 | 1.47 | 3.08E-02 | transcription_start_site | - | 20319 | 20319 | -3830 | 19993 | AN4778 |
| 1765 | CONTIG81 | 24005 | 24294 | 1.47 | 3.08E-02 | transcription_start_site | - | 20111 | 20111 | -4038 | 19994 | AN4778 |
| 1765 | CONTIG81 | 24005 | 24294 | 1.47 | 3.08E-02 | transcription_start_site | - | 20009 | 20009 | -4140 | 19995 | AN4778 |
| 1765 | CONTIG81 | 24005 | 24294 | 1.47 | 3.08E-02 | transcription_start_site | - | 19860 | 19860 | -4289 | 19996 | AN4778 |
| 1765 | CONTIG81 | 24005 | 24294 | 1.47 | 3.08E-02 | transcription_start_site | - | 19146 | 19146 | -5003 | 19997 | AN4778 |
| 1935 | CONTIG81 | 25430 | 25709 | 1.39 | 4.36E-02 | transcription_start_site | - | 20673 | 20673 | -4896 | 19991 | AN4778 |
| 1935 | CONTIG81 | 25430 | 25709 | 1.39 | 4.36E-02 | transcription_start_site | - | 20468 | 20468 | -5101 | 19992 | AN4778 |
| 2400 | CONTIG81 | 18095 | 18828 | 1.23 | 5.52E-02 | transcription_start_site | - | 19146 | 19146 | 684   | 19997 | AN4778 |
| 1572 | CONTIG81 | 21005 | 21359 | 1.55 | 1.06E-02 | transcription_start_site | - | 22259 | 22259 | 1077  | 19999 | AN4779 |
| 1765 | CONTIG81 | 24005 | 24294 | 1.47 | 3.08E-02 | transcription_start_site | - | 23012 | 23012 | -1137 | 19998 | AN4779 |
| 1765 | CONTIG81 | 24005 | 24294 | 1.47 | 3.08E-02 | transcription_start_site | - | 22259 | 22259 | -1890 | 19999 | AN4779 |
| 1935 | CONTIG81 | 25430 | 25709 | 1.39 | 4.36E-02 | transcription_start_site | - | 23012 | 23012 | -2557 | 19998 | AN4779 |
| 1935 | CONTIG81 | 25430 | 25709 | 1.39 | 4.36E-02 | transcription_start_site | - | 22259 | 22259 | -3310 | 19999 | AN4779 |
| 1572 | CONTIG81 | 21005 | 21359 | 1.55 | 1.06E-02 | transcription_start_site | + | 24172 | 24172 | -2990 | 20000 | AN4780 |
| 1572 | CONTIG81 | 21005 | 21359 | 1.55 | 1.06E-02 | transcription_start_site | + | 24402 | 24402 | -3220 | 20001 | AN4780 |
| 1765 | CONTIG81 | 24005 | 24294 | 1.47 | 3.08E-02 | transcription_start_site | + | 24172 | 24172 | -22   | 20000 | AN4780 |
| 1765 | CONTIG81 | 24005 | 24294 | 1.47 | 3.08E-02 | transcription_start_site | + | 24402 | 24402 | -252  | 20001 | AN4780 |
| 1572 | CONTIG81 | 21005 | 21359 | 1.55 | 1.06E-02 | transcription_start_site | + | 25521 | 25521 | -4339 | 20002 | AN4781 |
| 1765 | CONTIG81 | 24005 | 24294 | 1.47 | 3.08E-02 | transcription_start_site | + | 25521 | 25521 | -1371 | 20002 | AN4781 |
| 1765 | CONTIG81 | 24005 | 24294 | 1.47 | 3.08E-02 | transcription_start_site | + | 26434 | 26434 | -2284 | 20003 | AN4781 |
| 1935 | CONTIG81 | 25430 | 25709 | 1.39 | 4.36E-02 | transcription_start_site | + | 25521 | 25521 | 48    | 20002 | AN4781 |
| 1935 | CONTIG81 | 25430 | 25709 | 1.39 | 4.36E-02 | transcription_start_site | + | 26434 | 26434 | -864  | 20003 | AN4781 |
| 1765 | CONTIG81 | 24005 | 24294 | 1.47 | 3.08E-02 | transcription_start_site | + | 28950 | 28950 | -4800 | 20009 | AN4783 |
| 1765 | CONTIG81 | 24005 | 24294 | 1.47 | 3.08E-02 | transcription_start_site | + | 29055 | 29055 | -4905 | 20010 | AN4783 |
| 1765 | CONTIG81 | 24005 | 24294 | 1.47 | 3.08E-02 | transcription_start_site | + | 29266 | 29266 | -5116 | 20011 | AN4783 |
| 1935 | CONTIG81 | 25430 | 25709 | 1.39 | 4.36E-02 | transcription_start_site | + | 28950 | 28950 | -3380 | 20009 | AN4783 |
| 1935 | CONTIG81 | 25430 | 25709 | 1.39 | 4.36E-02 | transcription_start_site | + | 29055 | 29055 | -3485 | 20010 | AN4783 |
| 1935 | CONTIG81 | 25430 | 25709 | 1.39 | 4.36E-02 | transcription_start_site | + | 29266 | 29266 | -3696 | 20011 | AN4783 |
| 1935 | CONTIG81 | 25430 | 25709 | 1.39 | 4.36E-02 | transcription_start_site | + | 29376 | 29376 | -3806 | 20012 | AN4783 |
| 2934 | CONTIG81 | 43207 | 44011 | 0.99 | 1.99E-01 | transcription_start_site | - | 40030 | 40030 | -3579 | 20020 | AN4785 |
| 2934 | CONTIG81 | 43207 | 44011 | 0.99 | 1.99E-01 | transcription_start_site | - | 39921 | 39921 | -3688 | 20021 | AN4785 |

|      |          |        |        |      |          |                          |   |        |        |       |       |        |
|------|----------|--------|--------|------|----------|--------------------------|---|--------|--------|-------|-------|--------|
| 2934 | CONTIG81 | 43207  | 44011  | 0.99 | 1.99E-01 | transcription_start_site | - | 39837  | 39837  | -3772 | 20022 | AN4785 |
| 2934 | CONTIG81 | 43207  | 44011  | 0.99 | 1.99E-01 | transcription_start_site | - | 39671  | 39671  | -3938 | 20023 | AN4785 |
| 2934 | CONTIG81 | 43207  | 44011  | 0.99 | 1.99E-01 | transcription_start_site | - | 39297  | 39297  | -4312 | 20024 | AN4785 |
| 2934 | CONTIG81 | 43207  | 44011  | 0.99 | 1.99E-01 | transcription_start_site | + | 43709  | 43709  | -100  | 20027 | AN4786 |
| 2934 | CONTIG81 | 43207  | 44011  | 0.99 | 1.99E-01 | transcription_start_site | + | 43404  | 43404  | 205   | 20026 | AN4786 |
| 2934 | CONTIG81 | 43207  | 44011  | 0.99 | 1.99E-01 | transcription_start_site | + | 44264  | 44264  | -655  | 20028 | AN4786 |
| 2934 | CONTIG81 | 43207  | 44011  | 0.99 | 1.99E-01 | transcription_start_site | + | 47933  | 47933  | -4324 | 20034 | AN4789 |
| 2934 | CONTIG81 | 43207  | 44011  | 0.99 | 1.99E-01 | transcription_start_site | + | 48222  | 48222  | -4613 | 20035 | AN4789 |
| 2925 | CONTIG81 | 62419  | 62838  | 0.99 | 1.79E-01 | transcription_start_site | - | 57750  | 57750  | -4878 | 20036 | AN4790 |
| 2925 | CONTIG81 | 62419  | 62838  | 0.99 | 1.79E-01 | transcription_start_site | - | 57440  | 57440  | -5188 | 20037 | AN4790 |
| 2925 | CONTIG81 | 62419  | 62838  | 0.99 | 1.79E-01 | transcription_start_site | - | 61992  | 61992  | -636  | 20047 | AN4791 |
| 2925 | CONTIG81 | 62419  | 62838  | 0.99 | 1.79E-01 | transcription_start_site | - | 61853  | 61853  | -775  | 20048 | AN4791 |
| 2925 | CONTIG81 | 62419  | 62838  | 0.99 | 1.79E-01 | transcription_start_site | - | 61647  | 61647  | -981  | 20049 | AN4791 |
| 2925 | CONTIG81 | 62419  | 62838  | 0.99 | 1.79E-01 | transcription_start_site | - | 61486  | 61486  | -1142 | 20050 | AN4791 |
| 2925 | CONTIG81 | 62419  | 62838  | 0.99 | 1.79E-01 | transcription_start_site | - | 60717  | 60717  | -1911 | 20051 | AN4791 |
| 2925 | CONTIG81 | 62419  | 62838  | 0.99 | 1.79E-01 | transcription_start_site | - | 60622  | 60622  | -2006 | 20052 | AN4791 |
| 2925 | CONTIG81 | 62419  | 62838  | 0.99 | 1.79E-01 | transcription_start_site | - | 59374  | 59374  | -3254 | 20053 | AN4791 |
| 2925 | CONTIG81 | 62419  | 62838  | 0.99 | 1.79E-01 | transcription_start_site | - | 59199  | 59199  | -3429 | 20054 | AN4791 |
| 2925 | CONTIG81 | 62419  | 62838  | 0.99 | 1.79E-01 | transcription_start_site | - | 59035  | 59035  | -3593 | 20055 | AN4791 |
| 2925 | CONTIG81 | 62419  | 62838  | 0.99 | 1.79E-01 | transcription_start_site | + | 62940  | 62940  | -311  | 20056 | AN4792 |
| 2925 | CONTIG81 | 62419  | 62838  | 0.99 | 1.79E-01 | transcription_start_site | + | 63330  | 63330  | -701  | 20057 | AN4792 |
| 2925 | CONTIG81 | 62419  | 62838  | 0.99 | 1.79E-01 | transcription_start_site | + | 63907  | 63907  | -1278 | 20058 | AN4792 |
| 2925 | CONTIG81 | 62419  | 62838  | 0.99 | 1.79E-01 | transcription_start_site | + | 64421  | 64421  | -1792 | 20059 | AN4792 |
| 2925 | CONTIG81 | 62419  | 62838  | 0.99 | 1.79E-01 | transcription_start_site | + | 65323  | 65323  | -2694 | 20060 | AN4793 |
| 2925 | CONTIG81 | 62419  | 62838  | 0.99 | 1.79E-01 | transcription_start_site | + | 65404  | 65404  | -2775 | 20061 | AN4793 |
| 2925 | CONTIG81 | 62419  | 62838  | 0.99 | 1.79E-01 | transcription_start_site | + | 65724  | 65724  | -3095 | 20062 | AN4793 |
| 384  | CONTIG81 | 72689  | 73178  | 2.62 | 0.00E+00 | transcription_start_site | + | 75419  | 75419  | -2485 | 20068 | AN4795 |
| 384  | CONTIG81 | 72689  | 73178  | 2.62 | 0.00E+00 | transcription_start_site | + | 76131  | 76131  | -3197 | 20069 | AN4795 |
| 384  | CONTIG81 | 72689  | 73178  | 2.62 | 0.00E+00 | transcription_start_site | + | 76655  | 76655  | -3721 | 20070 | AN4795 |
| 799  | CONTIG81 | 94668  | 95084  | 2.1  | 1.54E-03 | transcription_start_site | - | 90633  | 90633  | -4243 | 20079 | AN4800 |
| 799  | CONTIG81 | 94668  | 95084  | 2.1  | 1.54E-03 | transcription_start_site | - | 90358  | 90358  | -4518 | 20080 | AN4800 |
| 799  | CONTIG81 | 94668  | 95084  | 2.1  | 1.54E-03 | transcription_start_site | - | 90196  | 90196  | -4680 | 20081 | AN4800 |
| 799  | CONTIG81 | 94668  | 95084  | 2.1  | 1.54E-03 | transcription_start_site | - | 89783  | 89783  | -5093 | 20082 | AN4800 |
| 799  | CONTIG81 | 94668  | 95084  | 2.1  | 1.54E-03 | transcription_start_site | - | 93223  | 93223  | -1653 | 20085 | AN4801 |
| 799  | CONTIG81 | 94668  | 95084  | 2.1  | 1.54E-03 | transcription_start_site | - | 92620  | 92620  | -2256 | 20086 | AN4801 |
| 799  | CONTIG81 | 94668  | 95084  | 2.1  | 1.54E-03 | transcription_start_site | - | 91323  | 91323  | -3553 | 20087 | AN4801 |
| 799  | CONTIG81 | 94668  | 95084  | 2.1  | 1.54E-03 | transcription_start_site | + | 97601  | 97601  | -2725 | 20092 | AN4803 |
| 799  | CONTIG81 | 94668  | 95084  | 2.1  | 1.54E-03 | transcription_start_site | + | 97685  | 97685  | -2809 | 20093 | AN4803 |
| 799  | CONTIG81 | 94668  | 95084  | 2.1  | 1.54E-03 | transcription_start_site | + | 97791  | 97791  | -2915 | 20094 | AN4803 |
| 799  | CONTIG81 | 94668  | 95084  | 2.1  | 1.54E-03 | transcription_start_site | + | 97890  | 97890  | -3014 | 20095 | AN4803 |
| 799  | CONTIG81 | 94668  | 95084  | 2.1  | 1.54E-03 | transcription_start_site | + | 98050  | 98050  | -3174 | 20096 | AN4803 |
| 799  | CONTIG81 | 94668  | 95084  | 2.1  | 1.54E-03 | transcription_start_site | + | 100068 | 100068 | -5192 | 20100 | AN4805 |
| 1113 | CONTIG81 | 104938 | 105301 | 1.82 | 6.61E-03 | transcription_start_site | + | 104664 | 104664 | 455   | 20110 | AN4807 |
| 1113 | CONTIG81 | 104938 | 105301 | 1.82 | 6.61E-03 | transcription_start_site | + | 104072 | 104072 | 1047  | 20109 | AN4807 |
| 1225 | CONTIG81 | 109593 | 110017 | 1.74 | 1.17E-03 | transcription_start_site | + | 114650 | 114650 | -4845 | 20111 | AN4809 |
| 1225 | CONTIG81 | 109593 | 110017 | 1.74 | 1.17E-03 | transcription_start_site | + | 114904 | 114904 | -5099 | 20112 | AN4809 |
| 1397 | CONTIG81 | 110413 | 110912 | 1.63 | 1.57E-02 | transcription_start_site | + | 114650 | 114650 | -3987 | 20111 | AN4809 |
| 1397 | CONTIG81 | 110413 | 110912 | 1.63 | 1.57E-02 | transcription_start_site | + | 114904 | 114904 | -4241 | 20112 | AN4809 |
| 1397 | CONTIG81 | 110413 | 110912 | 1.63 | 1.57E-02 | transcription_start_site | + | 115255 | 115255 | -4592 | 20113 | AN4809 |
| 1397 | CONTIG81 | 110413 | 110912 | 1.63 | 1.57E-02 | transcription_start_site | + | 115758 | 115758 | -5095 | 20114 | AN4809 |
| 1056 | CONTIG81 | 123153 | 123432 | 1.86 | 5.20E-03 | transcription_start_site | - | 119339 | 119339 | -3953 | 20119 | AN4810 |
| 1056 | CONTIG81 | 123153 | 123432 | 1.86 | 5.20E-03 | transcription_start_site | - | 118902 | 118902 | -4390 | 20120 | AN4810 |
| 1056 | CONTIG81 | 123153 | 123432 | 1.86 | 5.20E-03 | transcription_start_site | + | 122890 | 122890 | 402   | 20131 | AN4812 |
| 1056 | CONTIG81 | 123153 | 123432 | 1.86 | 5.20E-03 | transcription_start_site | - | 124030 | 124030 | 737   | 20135 | AN4813 |
| 490  | CONTIG81 | 140851 | 141125 | 2.46 | 2.67E-04 | transcription_start_site | - | 136619 | 136619 | -4369 | 20142 | AN4816 |
| 490  | CONTIG81 | 140851 | 141125 | 2.46 | 2.67E-04 | transcription_start_site | - | 136386 | 136386 | -4602 | 20143 | AN4816 |
| 2406 | CONTIG81 | 135976 | 136330 | 1.23 | 6.16E-02 | transcription_start_site | - | 136386 | 136386 | 233   | 20143 | AN4816 |



|      |          |        |        |      |          |                          |   |        |        |       |       |        |
|------|----------|--------|--------|------|----------|--------------------------|---|--------|--------|-------|-------|--------|
| 2406 | CONTIG81 | 135976 | 136330 | 1.23 | 6.16E-02 | transcription_start_site | - | 136619 | 136619 | 466   | 20142 | AN4816 |
| 2869 | CONTIG81 | 137796 | 138207 | 1.03 | 1.50E-01 | transcription_start_site | - | 136619 | 136619 | -1382 | 20142 | AN4816 |
| 2869 | CONTIG81 | 137796 | 138207 | 1.03 | 1.50E-01 | transcription_start_site | - | 136386 | 136386 | -1615 | 20143 | AN4816 |
| 490  | CONTIG81 | 140851 | 141125 | 2.46 | 2.67E-04 | transcription_start_site | + | 140399 | 140399 | 589   | 20146 | AN4817 |
| 2406 | CONTIG81 | 135976 | 136330 | 1.23 | 6.16E-02 | transcription_start_site | + | 138282 | 138282 | -2129 | 20144 | AN4817 |
| 2406 | CONTIG81 | 135976 | 136330 | 1.23 | 6.16E-02 | transcription_start_site | + | 138522 | 138522 | -2369 | 20145 | AN4817 |
| 2406 | CONTIG81 | 135976 | 136330 | 1.23 | 6.16E-02 | transcription_start_site | + | 140399 | 140399 | -4246 | 20146 | AN4817 |
| 2869 | CONTIG81 | 137796 | 138207 | 1.03 | 1.50E-01 | transcription_start_site | + | 138282 | 138282 | -280  | 20144 | AN4817 |
| 2869 | CONTIG81 | 137796 | 138207 | 1.03 | 1.50E-01 | transcription_start_site | + | 138522 | 138522 | -520  | 20145 | AN4817 |
| 2869 | CONTIG81 | 137796 | 138207 | 1.03 | 1.50E-01 | transcription_start_site | + | 140399 | 140399 | -2397 | 20146 | AN4817 |
| 490  | CONTIG81 | 140851 | 141125 | 2.46 | 2.67E-04 | transcription_start_site | + | 141550 | 141550 | -562  | 20147 | AN4818 |
| 490  | CONTIG81 | 140851 | 141125 | 2.46 | 2.67E-04 | transcription_start_site | + | 141932 | 141932 | -944  | 20148 | AN4818 |
| 490  | CONTIG81 | 140851 | 141125 | 2.46 | 2.67E-04 | transcription_start_site | + | 142148 | 142148 | -1160 | 20149 | AN4818 |
| 490  | CONTIG81 | 140851 | 141125 | 2.46 | 2.67E-04 | transcription_start_site | + | 143508 | 143508 | -2520 | 20150 | AN4818 |
| 490  | CONTIG81 | 140851 | 141125 | 2.46 | 2.67E-04 | transcription_start_site | + | 145287 | 145287 | -4299 | 20151 | AN4818 |
| 2869 | CONTIG81 | 137796 | 138207 | 1.03 | 1.50E-01 | transcription_start_site | + | 141550 | 141550 | -3548 | 20147 | AN4818 |
| 2869 | CONTIG81 | 137796 | 138207 | 1.03 | 1.50E-01 | transcription_start_site | + | 141932 | 141932 | -3930 | 20148 | AN4818 |
| 2869 | CONTIG81 | 137796 | 138207 | 1.03 | 1.50E-01 | transcription_start_site | + | 142148 | 142148 | -4146 | 20149 | AN4818 |
| 1932 | CONTIG81 | 150318 | 150957 | 1.39 | 2.64E-02 | transcription_start_site | - | 150623 | 150623 | -14   | 20157 | AN4820 |
| 1932 | CONTIG81 | 150318 | 150957 | 1.39 | 2.64E-02 | transcription_start_site | - | 150764 | 150764 | 126   | 20156 | AN4820 |
| 1932 | CONTIG81 | 150318 | 150957 | 1.39 | 2.64E-02 | transcription_start_site | - | 150844 | 150844 | 206   | 20155 | AN4820 |
| 1932 | CONTIG81 | 150318 | 150957 | 1.39 | 2.64E-02 | transcription_start_site | + | 152026 | 152026 | -1388 | 20158 | AN4821 |
| 1932 | CONTIG81 | 150318 | 150957 | 1.39 | 2.64E-02 | transcription_start_site | + | 152979 | 152979 | -2341 | 20159 | AN4821 |
| 1932 | CONTIG81 | 150318 | 150957 | 1.39 | 2.64E-02 | transcription_start_site | + | 153579 | 153579 | -2941 | 20160 | AN4821 |
| 1932 | CONTIG81 | 150318 | 150957 | 1.39 | 2.64E-02 | transcription_start_site | + | 154337 | 154337 | -3699 | 20161 | AN4822 |
| 1932 | CONTIG81 | 150318 | 150957 | 1.39 | 2.64E-02 | transcription_start_site | + | 154651 | 154651 | -4013 | 20162 | AN4822 |
| 1932 | CONTIG81 | 150318 | 150957 | 1.39 | 2.64E-02 | transcription_start_site | + | 155203 | 155203 | -4565 | 20163 | AN4822 |
| 3030 | CONTIG82 | 30153  | 30662  | 0.85 | 1.08E-01 | transcription_start_site | - | 25314  | 25314  | -5093 | 20194 | AN4830 |
| 3030 | CONTIG82 | 30153  | 30662  | 0.85 | 1.08E-01 | transcription_start_site | - | 27101  | 27101  | -3306 | 20196 | AN4831 |
| 3030 | CONTIG82 | 30153  | 30662  | 0.85 | 1.08E-01 | transcription_start_site | - | 26923  | 26923  | -3484 | 20197 | AN4831 |
| 3030 | CONTIG82 | 30153  | 30662  | 0.85 | 1.08E-01 | transcription_start_site | - | 26777  | 26777  | -3630 | 20198 | AN4831 |
| 3030 | CONTIG82 | 30153  | 30662  | 0.85 | 1.08E-01 | transcription_start_site | - | 26640  | 26640  | -3767 | 20199 | AN4831 |
| 3030 | CONTIG82 | 30153  | 30662  | 0.85 | 1.08E-01 | transcription_start_site | - | 26023  | 26023  | -4384 | 20200 | AN4831 |
| 3030 | CONTIG82 | 30153  | 30662  | 0.85 | 1.08E-01 | transcription_start_site | - | 29216  | 29216  | -1191 | 20201 | AN4832 |
| 3030 | CONTIG82 | 30153  | 30662  | 0.85 | 1.08E-01 | transcription_start_site | - | 29077  | 29077  | -1330 | 20202 | AN4832 |
| 3030 | CONTIG82 | 30153  | 30662  | 0.85 | 1.08E-01 | transcription_start_site | - | 28946  | 28946  | -1461 | 20203 | AN4832 |
| 3030 | CONTIG82 | 30153  | 30662  | 0.85 | 1.08E-01 | transcription_start_site | - | 28889  | 28889  | -1518 | 20204 | AN4832 |
| 3030 | CONTIG82 | 30153  | 30662  | 0.85 | 1.08E-01 | transcription_start_site | - | 28641  | 28641  | -1766 | 20205 | AN4832 |
| 3030 | CONTIG82 | 30153  | 30662  | 0.85 | 1.08E-01 | transcription_start_site | - | 28535  | 28535  | -1872 | 20206 | AN4832 |
| 3030 | CONTIG82 | 30153  | 30662  | 0.85 | 1.08E-01 | transcription_start_site | + | 29848  | 29848  | 559   | 20207 | AN4833 |
| 3030 | CONTIG82 | 30153  | 30662  | 0.85 | 1.08E-01 | transcription_start_site | + | 31968  | 31968  | -1560 | 20208 | AN4834 |
| 3030 | CONTIG82 | 30153  | 30662  | 0.85 | 1.08E-01 | transcription_start_site | + | 32922  | 32922  | -2514 | 20209 | AN4834 |
| 2203 | CONTIG82 | 42686  | 43490  | 1.29 | 4.17E-03 | transcription_start_site | - | 40376  | 40376  | -2712 | 20214 | AN4837 |
| 2203 | CONTIG82 | 42686  | 43490  | 1.29 | 4.17E-03 | transcription_start_site | - | 40229  | 40229  | -2859 | 20215 | AN4837 |
| 2203 | CONTIG82 | 42686  | 43490  | 1.29 | 4.17E-03 | transcription_start_site | - | 39910  | 39910  | -3178 | 20216 | AN4837 |
| 2203 | CONTIG82 | 42686  | 43490  | 1.29 | 4.17E-03 | transcription_start_site | + | 42816  | 42816  | 272   | 20217 | AN4838 |
| 2203 | CONTIG82 | 42686  | 43490  | 1.29 | 4.17E-03 | transcription_start_site | + | 43473  | 43473  | -385  | 20218 | AN4838 |
| 1554 | CONTIG83 | 1746   | 2005   | 1.56 | 4.36E-02 | transcription_start_site | - | 1735   | 1735   | -140  | 20219 | AN4839 |
| 1554 | CONTIG83 | 1746   | 2005   | 1.56 | 4.36E-02 | transcription_start_site | + | 4364   | 4364   | -2488 | 20220 | AN4840 |
| 1554 | CONTIG83 | 1746   | 2005   | 1.56 | 4.36E-02 | transcription_start_site | + | 4761   | 4761   | -2885 | 20221 | AN4840 |
| 1554 | CONTIG83 | 1746   | 2005   | 1.56 | 4.36E-02 | transcription_start_site | + | 4896   | 4896   | -3020 | 20222 | AN4840 |
| 1554 | CONTIG83 | 1746   | 2005   | 1.56 | 4.36E-02 | transcription_start_site | + | 5047   | 5047   | -3171 | 20223 | AN4840 |
| 1554 | CONTIG83 | 1746   | 2005   | 1.56 | 4.36E-02 | transcription_start_site | + | 5878   | 5878   | -4002 | 20224 | AN4840 |
| 1294 | CONTIG83 | 8701   | 8995   | 1.7  | 2.62E-02 | transcription_start_site | + | 8500   | 8500   | 348   | 20225 | AN4841 |
| 1110 | CONTIG83 | 12691  | 12955  | 1.83 | 1.57E-02 | transcription_start_site | - | 10151  | 10151  | -2672 | 20226 | AN4842 |
| 1110 | CONTIG83 | 12691  | 12955  | 1.83 | 1.57E-02 | transcription_start_site | - | 9679   | 9679   | -3144 | 20227 | AN4842 |
| 1110 | CONTIG83 | 12691  | 12955  | 1.83 | 1.57E-02 | transcription_start_site | - | 9290   | 9290   | -3533 | 20228 | AN4842 |

|               |       |       |      |          |                          |   |       |       |       |       |        |
|---------------|-------|-------|------|----------|--------------------------|---|-------|-------|-------|-------|--------|
| 1294 CONTIG83 | 8701  | 8995  | 1.7  | 2.62E-02 | transcription_start_site | - | 9290  | 9290  | 442   | 20228 | AN4842 |
| 1294 CONTIG83 | 8701  | 8995  | 1.7  | 2.62E-02 | transcription_start_site | - | 9679  | 9679  | 831   | 20227 | AN4842 |
| 1295 CONTIG83 | 13066 | 14300 | 1.7  | 2.62E-02 | transcription_start_site | - | 10151 | 10151 | -3532 | 20226 | AN4842 |
| 1295 CONTIG83 | 13066 | 14300 | 1.7  | 2.62E-02 | transcription_start_site | - | 9679  | 9679  | -4004 | 20227 | AN4842 |
| 1295 CONTIG83 | 13066 | 14300 | 1.7  | 2.62E-02 | transcription_start_site | - | 9290  | 9290  | -4393 | 20228 | AN4842 |
| 802 CONTIG83  | 16052 | 16413 | 2.1  | 5.20E-03 | transcription_start_site | - | 12300 | 12300 | -3932 | 20229 | AN4843 |
| 802 CONTIG83  | 16052 | 16413 | 2.1  | 5.20E-03 | transcription_start_site | - | 11766 | 11766 | -4466 | 20230 | AN4843 |
| 1110 CONTIG83 | 12691 | 12955 | 1.83 | 1.57E-02 | transcription_start_site | - | 12300 | 12300 | -523  | 20229 | AN4843 |
| 1110 CONTIG83 | 12691 | 12955 | 1.83 | 1.57E-02 | transcription_start_site | - | 11766 | 11766 | -1057 | 20230 | AN4843 |
| 1110 CONTIG83 | 12691 | 12955 | 1.83 | 1.57E-02 | transcription_start_site | - | 10957 | 10957 | -1866 | 20231 | AN4843 |
| 1295 CONTIG83 | 13066 | 14300 | 1.7  | 2.62E-02 | transcription_start_site | - | 12300 | 12300 | -1383 | 20229 | AN4843 |
| 1295 CONTIG83 | 13066 | 14300 | 1.7  | 2.62E-02 | transcription_start_site | - | 11766 | 11766 | -1917 | 20230 | AN4843 |
| 1295 CONTIG83 | 13066 | 14300 | 1.7  | 2.62E-02 | transcription_start_site | - | 10957 | 10957 | -2726 | 20231 | AN4843 |
| 802 CONTIG83  | 16052 | 16413 | 2.1  | 5.20E-03 | transcription_start_site | + | 16807 | 16807 | -574  | 20232 | AN4845 |
| 802 CONTIG83  | 16052 | 16413 | 2.1  | 5.20E-03 | transcription_start_site | + | 17114 | 17114 | -881  | 20233 | AN4845 |
| 802 CONTIG83  | 16052 | 16413 | 2.1  | 5.20E-03 | transcription_start_site | + | 18163 | 18163 | -1930 | 20234 | AN4845 |
| 802 CONTIG83  | 16052 | 16413 | 2.1  | 5.20E-03 | transcription_start_site | + | 18255 | 18255 | -2022 | 20235 | AN4845 |
| 1110 CONTIG83 | 12691 | 12955 | 1.83 | 1.57E-02 | transcription_start_site | + | 16807 | 16807 | -3984 | 20232 | AN4845 |
| 1110 CONTIG83 | 12691 | 12955 | 1.83 | 1.57E-02 | transcription_start_site | + | 17114 | 17114 | -4291 | 20233 | AN4845 |
| 1295 CONTIG83 | 13066 | 14300 | 1.7  | 2.62E-02 | transcription_start_site | + | 16807 | 16807 | -3124 | 20232 | AN4845 |
| 1295 CONTIG83 | 13066 | 14300 | 1.7  | 2.62E-02 | transcription_start_site | + | 17114 | 17114 | -3431 | 20233 | AN4845 |
| 1295 CONTIG83 | 13066 | 14300 | 1.7  | 2.62E-02 | transcription_start_site | + | 18163 | 18163 | -4480 | 20234 | AN4845 |
| 1295 CONTIG83 | 13066 | 14300 | 1.7  | 2.62E-02 | transcription_start_site | + | 18255 | 18255 | -4572 | 20235 | AN4845 |
| 802 CONTIG83  | 16052 | 16413 | 2.1  | 5.20E-03 | transcription_start_site | + | 19893 | 19893 | -3660 | 20236 | AN4846 |
| 802 CONTIG83  | 16052 | 16413 | 2.1  | 5.20E-03 | transcription_start_site | + | 20254 | 20254 | -4021 | 20237 | AN4846 |
| 761 CONTIG83  | 52065 | 52414 | 2.14 | 4.61E-03 | transcription_start_site | - | 49403 | 49403 | -2836 | 20258 | AN4854 |
| 761 CONTIG83  | 52065 | 52414 | 2.14 | 4.61E-03 | transcription_start_site | - | 49158 | 49158 | -3081 | 20259 | AN4854 |
| 761 CONTIG83  | 52065 | 52414 | 2.14 | 4.61E-03 | transcription_start_site | - | 48723 | 48723 | -3516 | 20260 | AN4854 |
| 761 CONTIG83  | 52065 | 52414 | 2.14 | 4.61E-03 | transcription_start_site | - | 48619 | 48619 | -3620 | 20261 | AN4854 |
| 761 CONTIG83  | 52065 | 52414 | 2.14 | 4.61E-03 | transcription_start_site | + | 53765 | 53765 | -1525 | 20262 | AN4855 |
| 761 CONTIG83  | 52065 | 52414 | 2.14 | 4.61E-03 | transcription_start_site | + | 54193 | 54193 | -1953 | 20263 | AN4855 |
| 517 CONTIG84  | 15994 | 17603 | 2.42 | 0.00E+00 | transcription_start_site | + | 21823 | 21823 | -5024 | 20266 | AN4859 |
| 517 CONTIG84  | 15994 | 17603 | 2.42 | 0.00E+00 | transcription_start_site | + | 22286 | 22286 | -5487 | 20267 | AN4859 |
| 517 CONTIG84  | 15994 | 17603 | 2.42 | 0.00E+00 | transcription_start_site | + | 22576 | 22576 | -5777 | 20268 | AN4859 |
| 845 CONTIG84  | 21159 | 21662 | 2.06 | 1.84E-02 | transcription_start_site | + | 21823 | 21823 | -412  | 20266 | AN4859 |
| 845 CONTIG84  | 21159 | 21662 | 2.06 | 1.84E-02 | transcription_start_site | + | 22286 | 22286 | -875  | 20267 | AN4859 |
| 845 CONTIG84  | 21159 | 21662 | 2.06 | 1.84E-02 | transcription_start_site | + | 22576 | 22576 | -1165 | 20268 | AN4859 |
| 845 CONTIG84  | 21159 | 21662 | 2.06 | 1.84E-02 | transcription_start_site | + | 26591 | 26591 | -5180 | 20269 | AN4860 |
| 675 CONTIG84  | 47565 | 47989 | 2.22 | 4.81E-03 | transcription_start_site | + | 46608 | 46608 | 1169  | 20289 | AN4869 |
| 675 CONTIG84  | 47565 | 47989 | 2.22 | 4.81E-03 | transcription_start_site | + | 48488 | 48488 | -711  | 20290 | AN4870 |
| 675 CONTIG84  | 47565 | 47989 | 2.22 | 4.81E-03 | transcription_start_site | + | 48560 | 48560 | -783  | 20291 | AN4870 |
| 675 CONTIG84  | 47565 | 47989 | 2.22 | 4.81E-03 | transcription_start_site | + | 48854 | 48854 | -1077 | 20292 | AN4870 |
| 675 CONTIG84  | 47565 | 47989 | 2.22 | 4.81E-03 | transcription_start_site | + | 49076 | 49076 | -1299 | 20293 | AN4870 |
| 675 CONTIG84  | 47565 | 47989 | 2.22 | 4.81E-03 | transcription_start_site | + | 51428 | 51428 | -3651 | 20294 | AN4871 |
| 675 CONTIG84  | 47565 | 47989 | 2.22 | 4.81E-03 | transcription_start_site | + | 51521 | 51521 | -3744 | 20295 | AN4871 |
| 675 CONTIG84  | 47565 | 47989 | 2.22 | 4.81E-03 | transcription_start_site | + | 51681 | 51681 | -3904 | 20296 | AN4871 |
| 675 CONTIG84  | 47565 | 47989 | 2.22 | 4.81E-03 | transcription_start_site | + | 51996 | 51996 | -4219 | 20297 | AN4871 |
| 675 CONTIG84  | 47565 | 47989 | 2.22 | 4.81E-03 | transcription_start_site | + | 52073 | 52073 | -4296 | 20298 | AN4871 |
| 675 CONTIG84  | 47565 | 47989 | 2.22 | 4.81E-03 | transcription_start_site | + | 52172 | 52172 | -4395 | 20299 | AN4871 |
| 675 CONTIG84  | 47565 | 47989 | 2.22 | 4.81E-03 | transcription_start_site | + | 52276 | 52276 | -4499 | 20300 | AN4871 |
| 1482 CONTIG84 | 54160 | 54659 | 1.6  | 8.01E-02 | transcription_start_site | - | 53784 | 53784 | -625  | 20301 | AN4872 |
| 1482 CONTIG84 | 54160 | 54659 | 1.6  | 8.01E-02 | transcription_start_site | - | 53633 | 53633 | -776  | 20302 | AN4872 |
| 1482 CONTIG84 | 54160 | 54659 | 1.6  | 8.01E-02 | transcription_start_site | - | 53302 | 53302 | -1107 | 20303 | AN4872 |
| 1482 CONTIG84 | 54160 | 54659 | 1.6  | 8.01E-02 | transcription_start_site | + | 55154 | 55154 | -744  | 20304 | AN4873 |
| 1482 CONTIG84 | 54160 | 54659 | 1.6  | 8.01E-02 | transcription_start_site | + | 55861 | 55861 | -1451 | 20305 | AN4873 |
| 676 CONTIG84  | 65857 | 66667 | 2.22 | 4.81E-03 | transcription_start_site | - | 61719 | 61719 | -4543 | 20312 | AN4875 |
| 676 CONTIG84  | 65857 | 66667 | 2.22 | 4.81E-03 | transcription_start_site | - | 61311 | 61311 | -4951 | 20313 | AN4875 |

|      |          |        |        |      |          |                          |   |        |        |       |       |        |
|------|----------|--------|--------|------|----------|--------------------------|---|--------|--------|-------|-------|--------|
| 676  | CONTIG84 | 65857  | 66667  | 2.22 | 4.81E-03 | transcription_start_site | + | 65775  | 65775  | 487   | 20318 | AN4876 |
| 846  | CONTIG84 | 72242  | 72507  | 2.06 | 1.84E-02 | transcription_start_site | - | 71575  | 71575  | -799  | 20319 | AN4877 |
| 846  | CONTIG84 | 72242  | 72507  | 2.06 | 1.84E-02 | transcription_start_site | - | 70965  | 70965  | -1409 | 20320 | AN4877 |
| 381  | CONTIG84 | 67592  | 69361  | 2.63 | 0.00E+00 | transcription_start_site | + | 73365  | 73365  | -4888 | 20321 | AN4878 |
| 381  | CONTIG84 | 67592  | 69361  | 2.63 | 0.00E+00 | transcription_start_site | + | 73452  | 73452  | -4975 | 20322 | AN4878 |
| 381  | CONTIG84 | 67592  | 69361  | 2.63 | 0.00E+00 | transcription_start_site | + | 73707  | 73707  | -5230 | 20323 | AN4878 |
| 381  | CONTIG84 | 67592  | 69361  | 2.63 | 0.00E+00 | transcription_start_site | + | 74279  | 74279  | -5802 | 20324 | AN4878 |
| 846  | CONTIG84 | 72242  | 72507  | 2.06 | 1.84E-02 | transcription_start_site | + | 73365  | 73365  | -990  | 20321 | AN4878 |
| 846  | CONTIG84 | 72242  | 72507  | 2.06 | 1.84E-02 | transcription_start_site | + | 73452  | 73452  | -1077 | 20322 | AN4878 |
| 846  | CONTIG84 | 72242  | 72507  | 2.06 | 1.84E-02 | transcription_start_site | + | 73707  | 73707  | -1332 | 20323 | AN4878 |
| 846  | CONTIG84 | 72242  | 72507  | 2.06 | 1.84E-02 | transcription_start_site | + | 74279  | 74279  | -1904 | 20324 | AN4878 |
| 846  | CONTIG84 | 72242  | 72507  | 2.06 | 1.84E-02 | transcription_start_site | + | 75583  | 75583  | -3208 | 20325 | AN4878 |
| 473  | CONTIG84 | 77037  | 77311  | 2.48 | 4.61E-03 | transcription_start_site | + | 78668  | 78668  | -1494 | 20326 | AN4879 |
| 473  | CONTIG84 | 77037  | 77311  | 2.48 | 4.61E-03 | transcription_start_site | + | 78790  | 78790  | -1616 | 20327 | AN4879 |
| 1144 | CONTIG84 | 83942  | 84441  | 1.8  | 4.36E-02 | transcription_start_site | - | 82800  | 82800  | -1391 | 20328 | AN4880 |
| 1144 | CONTIG84 | 83942  | 84441  | 1.8  | 4.36E-02 | transcription_start_site | - | 82427  | 82427  | -1764 | 20329 | AN4880 |
| 1144 | CONTIG84 | 83942  | 84441  | 1.8  | 4.36E-02 | transcription_start_site | - | 82275  | 82275  | -1916 | 20330 | AN4880 |
| 1144 | CONTIG84 | 83942  | 84441  | 1.8  | 4.36E-02 | transcription_start_site | - | 80485  | 80485  | -3706 | 20331 | AN4880 |
| 1144 | CONTIG84 | 83942  | 84441  | 1.8  | 4.36E-02 | transcription_start_site | - | 80303  | 80303  | -3888 | 20332 | AN4880 |
| 1145 | CONTIG84 | 85502  | 85936  | 1.8  | 4.36E-02 | transcription_start_site | - | 82800  | 82800  | -2919 | 20328 | AN4880 |
| 1145 | CONTIG84 | 85502  | 85936  | 1.8  | 4.36E-02 | transcription_start_site | - | 82427  | 82427  | -3292 | 20329 | AN4880 |
| 1145 | CONTIG84 | 85502  | 85936  | 1.8  | 4.36E-02 | transcription_start_site | - | 82275  | 82275  | -3444 | 20330 | AN4880 |
| 1144 | CONTIG84 | 83942  | 84441  | 1.8  | 4.36E-02 | transcription_start_site | + | 84984  | 84984  | -792  | 20333 | AN4881 |
| 1144 | CONTIG84 | 83942  | 84441  | 1.8  | 4.36E-02 | transcription_start_site | + | 85105  | 85105  | -913  | 20334 | AN4881 |
| 1145 | CONTIG84 | 85502  | 85936  | 1.8  | 4.36E-02 | transcription_start_site | + | 85105  | 85105  | 614   | 20334 | AN4881 |
| 1145 | CONTIG84 | 85502  | 85936  | 1.8  | 4.36E-02 | transcription_start_site | + | 84984  | 84984  | 735   | 20333 | AN4881 |
| 1145 | CONTIG84 | 85502  | 85936  | 1.8  | 4.36E-02 | transcription_start_site | - | 86734  | 86734  | 1015  | 20338 | AN4882 |
| 1580 | CONTIG84 | 112505 | 112940 | 1.55 | 9.24E-02 | transcription_start_site | - | 109397 | 109397 | -3325 | 20350 | AN4887 |
| 1580 | CONTIG84 | 112505 | 112940 | 1.55 | 9.24E-02 | transcription_start_site | - | 112409 | 112409 | -313  | 20353 | AN4888 |
| 1580 | CONTIG84 | 112505 | 112940 | 1.55 | 9.24E-02 | transcription_start_site | - | 112242 | 112242 | -480  | 20354 | AN4888 |
| 1580 | CONTIG84 | 112505 | 112940 | 1.55 | 9.24E-02 | transcription_start_site | - | 112101 | 112101 | -621  | 20355 | AN4888 |
| 1580 | CONTIG84 | 112505 | 112940 | 1.55 | 9.24E-02 | transcription_start_site | - | 110821 | 110821 | -1901 | 20356 | AN4888 |
| 1580 | CONTIG84 | 112505 | 112940 | 1.55 | 9.24E-02 | transcription_start_site | - | 110562 | 110562 | -2160 | 20357 | AN4888 |
| 1580 | CONTIG84 | 112505 | 112940 | 1.55 | 9.24E-02 | transcription_start_site | + | 112977 | 112977 | -254  | 20358 | AN4889 |
| 1580 | CONTIG84 | 112505 | 112940 | 1.55 | 9.24E-02 | transcription_start_site | + | 113104 | 113104 | -381  | 20359 | AN4889 |
| 1580 | CONTIG84 | 112505 | 112940 | 1.55 | 9.24E-02 | transcription_start_site | + | 113295 | 113295 | -572  | 20360 | AN4889 |
| 1580 | CONTIG84 | 112505 | 112940 | 1.55 | 9.24E-02 | transcription_start_site | + | 113505 | 113505 | -782  | 20361 | AN4889 |
| 1580 | CONTIG84 | 112505 | 112940 | 1.55 | 9.24E-02 | transcription_start_site | + | 113779 | 113779 | -1056 | 20362 | AN4889 |
| 1580 | CONTIG84 | 112505 | 112940 | 1.55 | 9.24E-02 | transcription_start_site | + | 113969 | 113969 | -1246 | 20363 | AN4889 |
| 1580 | CONTIG84 | 112505 | 112940 | 1.55 | 9.24E-02 | transcription_start_site | + | 116528 | 116528 | -3805 | 20364 | AN4890 |
| 1580 | CONTIG84 | 112505 | 112940 | 1.55 | 9.24E-02 | transcription_start_site | + | 116678 | 116678 | -3955 | 20365 | AN4890 |
| 1580 | CONTIG84 | 112505 | 112940 | 1.55 | 9.24E-02 | transcription_start_site | + | 117063 | 117063 | -4340 | 20366 | AN4890 |
| 1581 | CONTIG84 | 134412 | 134837 | 1.55 | 9.24E-02 | transcription_start_site | - | 134770 | 134770 | 145   | 20383 | AN4894 |
| 1581 | CONTIG84 | 134412 | 134837 | 1.55 | 9.24E-02 | transcription_start_site | - | 133649 | 133649 | -975  | 20384 | AN4894 |
| 1581 | CONTIG84 | 134412 | 134837 | 1.55 | 9.24E-02 | transcription_start_site | - | 132474 | 132474 | -2150 | 20385 | AN4894 |
| 1581 | CONTIG84 | 134412 | 134837 | 1.55 | 9.24E-02 | transcription_start_site | - | 131735 | 131735 | -2889 | 20386 | AN4894 |
| 1581 | CONTIG84 | 134412 | 134837 | 1.55 | 9.24E-02 | transcription_start_site | - | 131510 | 131510 | -3114 | 20387 | AN4894 |
| 1581 | CONTIG84 | 134412 | 134837 | 1.55 | 9.24E-02 | transcription_start_site | + | 135389 | 135389 | -764  | 20388 | AN4895 |
| 1581 | CONTIG84 | 134412 | 134837 | 1.55 | 9.24E-02 | transcription_start_site | + | 135525 | 135525 | -900  | 20389 | AN4895 |
| 118  | CONTIG84 | 141618 | 141962 | 3.15 | 2.39E-04 | transcription_start_site | - | 138755 | 138755 | -3035 | 20390 | AN4896 |
| 118  | CONTIG84 | 141618 | 141962 | 3.15 | 2.39E-04 | transcription_start_site | - | 138519 | 138519 | -3271 | 20391 | AN4896 |
| 118  | CONTIG84 | 141618 | 141962 | 3.15 | 2.39E-04 | transcription_start_site | - | 138202 | 138202 | -3588 | 20392 | AN4896 |
| 2243 | CONTIG84 | 142593 | 143546 | 1.29 | 1.79E-01 | transcription_start_site | - | 138755 | 138755 | -4314 | 20390 | AN4896 |
| 2243 | CONTIG84 | 142593 | 143546 | 1.29 | 1.79E-01 | transcription_start_site | - | 138519 | 138519 | -4550 | 20391 | AN4896 |
| 2243 | CONTIG84 | 142593 | 143546 | 1.29 | 1.79E-01 | transcription_start_site | - | 138202 | 138202 | -4867 | 20392 | AN4896 |
| 118  | CONTIG84 | 141618 | 141962 | 3.15 | 2.39E-04 | transcription_start_site | + | 142558 | 142558 | -768  | 20393 | AN4897 |
| 2243 | CONTIG84 | 142593 | 143546 | 1.29 | 1.79E-01 | transcription_start_site | + | 142558 | 142558 | 511   | 20393 | AN4897 |

|      |          |        |        |      |          |                          |   |        |        |       |       |        |
|------|----------|--------|--------|------|----------|--------------------------|---|--------|--------|-------|-------|--------|
| 118  | CONTIG84 | 141618 | 141962 | 3.15 | 2.39E-04 | transcription_start_site | + | 144006 | 144006 | -2216 | 20394 | AN4898 |
| 118  | CONTIG84 | 141618 | 141962 | 3.15 | 2.39E-04 | transcription_start_site | + | 144091 | 144091 | -2301 | 20395 | AN4898 |
| 118  | CONTIG84 | 141618 | 141962 | 3.15 | 2.39E-04 | transcription_start_site | + | 144489 | 144489 | -2699 | 20396 | AN4898 |
| 118  | CONTIG84 | 141618 | 141962 | 3.15 | 2.39E-04 | transcription_start_site | + | 144847 | 144847 | -3057 | 20397 | AN4898 |
| 118  | CONTIG84 | 141618 | 141962 | 3.15 | 2.39E-04 | transcription_start_site | + | 144979 | 144979 | -3189 | 20398 | AN4898 |
| 118  | CONTIG84 | 141618 | 141962 | 3.15 | 2.39E-04 | transcription_start_site | + | 145585 | 145585 | -3795 | 20399 | AN4898 |
| 118  | CONTIG84 | 141618 | 141962 | 3.15 | 2.39E-04 | transcription_start_site | + | 146563 | 146563 | -4773 | 20400 | AN4898 |
| 2243 | CONTIG84 | 142593 | 143546 | 1.29 | 1.79E-01 | transcription_start_site | + | 144006 | 144006 | -936  | 20394 | AN4898 |
| 2243 | CONTIG84 | 142593 | 143546 | 1.29 | 1.79E-01 | transcription_start_site | + | 144091 | 144091 | -1021 | 20395 | AN4898 |
| 2243 | CONTIG84 | 142593 | 143546 | 1.29 | 1.79E-01 | transcription_start_site | + | 144489 | 144489 | -1419 | 20396 | AN4898 |
| 2243 | CONTIG84 | 142593 | 143546 | 1.29 | 1.79E-01 | transcription_start_site | + | 144847 | 144847 | -1777 | 20397 | AN4898 |
| 2243 | CONTIG84 | 142593 | 143546 | 1.29 | 1.79E-01 | transcription_start_site | + | 144979 | 144979 | -1909 | 20398 | AN4898 |
| 2243 | CONTIG84 | 142593 | 143546 | 1.29 | 1.79E-01 | transcription_start_site | + | 145585 | 145585 | -2515 | 20399 | AN4898 |
| 2243 | CONTIG84 | 142593 | 143546 | 1.29 | 1.79E-01 | transcription_start_site | + | 146563 | 146563 | -3493 | 20400 | AN4898 |
| 322  | CONTIG84 | 149259 | 149619 | 2.73 | 1.54E-03 | transcription_start_site | - | 148476 | 148476 | -963  | 20401 | AN4899 |
| 322  | CONTIG84 | 149259 | 149619 | 2.73 | 1.54E-03 | transcription_start_site | - | 148184 | 148184 | -1255 | 20402 | AN4899 |
| 322  | CONTIG84 | 149259 | 149619 | 2.73 | 1.54E-03 | transcription_start_site | - | 147322 | 147322 | -2117 | 20403 | AN4899 |
| 1483 | CONTIG84 | 151671 | 151940 | 1.6  | 8.01E-02 | transcription_start_site | - | 148476 | 148476 | -3329 | 20401 | AN4899 |
| 1483 | CONTIG84 | 151671 | 151940 | 1.6  | 8.01E-02 | transcription_start_site | - | 148184 | 148184 | -3621 | 20402 | AN4899 |
| 1483 | CONTIG84 | 151671 | 151940 | 1.6  | 8.01E-02 | transcription_start_site | - | 147322 | 147322 | -4483 | 20403 | AN4899 |
| 1484 | CONTIG84 | 152781 | 153275 | 1.6  | 8.01E-02 | transcription_start_site | - | 148476 | 148476 | -4552 | 20401 | AN4899 |
| 1484 | CONTIG84 | 152781 | 153275 | 1.6  | 8.01E-02 | transcription_start_site | - | 148184 | 148184 | -4844 | 20402 | AN4899 |
| 1702 | CONTIG84 | 148144 | 148718 | 1.5  | 9.26E-02 | transcription_start_site | - | 148476 | 148476 | 45    | 20401 | AN4899 |
| 1702 | CONTIG84 | 148144 | 148718 | 1.5  | 9.26E-02 | transcription_start_site | - | 148184 | 148184 | -247  | 20402 | AN4899 |
| 1702 | CONTIG84 | 148144 | 148718 | 1.5  | 9.26E-02 | transcription_start_site | - | 147322 | 147322 | -1109 | 20403 | AN4899 |
| 322  | CONTIG84 | 149259 | 149619 | 2.73 | 1.54E-03 | transcription_start_site | + | 150842 | 150842 | -1403 | 20404 | AN4900 |
| 322  | CONTIG84 | 149259 | 149619 | 2.73 | 1.54E-03 | transcription_start_site | + | 151360 | 151360 | -1921 | 20405 | AN4900 |
| 322  | CONTIG84 | 149259 | 149619 | 2.73 | 1.54E-03 | transcription_start_site | + | 151630 | 151630 | -2191 | 20406 | AN4900 |
| 322  | CONTIG84 | 149259 | 149619 | 2.73 | 1.54E-03 | transcription_start_site | + | 152180 | 152180 | -2741 | 20407 | AN4900 |
| 1483 | CONTIG84 | 151671 | 151940 | 1.6  | 8.01E-02 | transcription_start_site | + | 151630 | 151630 | 175   | 20406 | AN4900 |
| 1483 | CONTIG84 | 151671 | 151940 | 1.6  | 8.01E-02 | transcription_start_site | + | 152180 | 152180 | -374  | 20407 | AN4900 |
| 1483 | CONTIG84 | 151671 | 151940 | 1.6  | 8.01E-02 | transcription_start_site | + | 151360 | 151360 | 445   | 20405 | AN4900 |
| 1483 | CONTIG84 | 151671 | 151940 | 1.6  | 8.01E-02 | transcription_start_site | + | 150842 | 150842 | 963   | 20404 | AN4900 |
| 1484 | CONTIG84 | 152781 | 153275 | 1.6  | 8.01E-02 | transcription_start_site | + | 152180 | 152180 | 848   | 20407 | AN4900 |
| 1702 | CONTIG84 | 148144 | 148718 | 1.5  | 9.26E-02 | transcription_start_site | + | 150842 | 150842 | -2411 | 20404 | AN4900 |
| 1702 | CONTIG84 | 148144 | 148718 | 1.5  | 9.26E-02 | transcription_start_site | + | 151360 | 151360 | -2929 | 20405 | AN4900 |
| 1702 | CONTIG84 | 148144 | 148718 | 1.5  | 9.26E-02 | transcription_start_site | + | 151630 | 151630 | -3199 | 20406 | AN4900 |
| 1702 | CONTIG84 | 148144 | 148718 | 1.5  | 9.26E-02 | transcription_start_site | + | 152180 | 152180 | -3749 | 20407 | AN4900 |
| 1706 | CONTIG84 | 161116 | 161450 | 1.5  | 1.08E-01 | transcription_start_site | - | 158042 | 158042 | -3241 | 20408 | AN4901 |
| 1706 | CONTIG84 | 161116 | 161450 | 1.5  | 1.08E-01 | transcription_start_site | - | 157732 | 157732 | -3551 | 20409 | AN4901 |
| 1706 | CONTIG84 | 161116 | 161450 | 1.5  | 1.08E-01 | transcription_start_site | - | 157276 | 157276 | -4007 | 20410 | AN4901 |
| 1706 | CONTIG84 | 161116 | 161450 | 1.5  | 1.08E-01 | transcription_start_site | - | 156220 | 156220 | -5063 | 20411 | AN4901 |
| 2245 | CONTIG84 | 158251 | 158535 | 1.29 | 1.93E-01 | transcription_start_site | - | 158042 | 158042 | -351  | 20408 | AN4901 |
| 2245 | CONTIG84 | 158251 | 158535 | 1.29 | 1.93E-01 | transcription_start_site | - | 157732 | 157732 | -661  | 20409 | AN4901 |
| 2245 | CONTIG84 | 158251 | 158535 | 1.29 | 1.93E-01 | transcription_start_site | - | 157276 | 157276 | -1117 | 20410 | AN4901 |
| 2245 | CONTIG84 | 158251 | 158535 | 1.29 | 1.93E-01 | transcription_start_site | - | 156220 | 156220 | -2173 | 20411 | AN4901 |
| 2245 | CONTIG84 | 158251 | 158535 | 1.29 | 1.93E-01 | transcription_start_site | - | 156041 | 156041 | -2352 | 20412 | AN4901 |
| 2097 | CONTIG84 | 153996 | 154485 | 1.34 | 1.66E-01 | transcription_start_site | + | 159242 | 159242 | -5001 | 20413 | AN4902 |
| 2245 | CONTIG84 | 158251 | 158535 | 1.29 | 1.93E-01 | transcription_start_site | + | 159242 | 159242 | -849  | 20413 | AN4902 |
| 2245 | CONTIG84 | 158251 | 158535 | 1.29 | 1.93E-01 | transcription_start_site | + | 159689 | 159689 | -1296 | 20414 | AN4902 |
| 1706 | CONTIG84 | 161116 | 161450 | 1.5  | 1.08E-01 | transcription_start_site | - | 161583 | 161583 | 300   | 20416 | AN4903 |
| 1706 | CONTIG84 | 161116 | 161450 | 1.5  | 1.08E-01 | transcription_start_site | - | 162149 | 162149 | 866   | 20415 | AN4903 |
| 1961 | CONTIG84 | 172135 | 172479 | 1.39 | 1.44E-01 | transcription_start_site | - | 168821 | 168821 | -3486 | 20422 | AN4905 |
| 1961 | CONTIG84 | 172135 | 172479 | 1.39 | 1.44E-01 | transcription_start_site | - | 168537 | 168537 | -3770 | 20423 | AN4905 |
| 1961 | CONTIG84 | 172135 | 172479 | 1.39 | 1.44E-01 | transcription_start_site | - | 168433 | 168433 | -3874 | 20424 | AN4905 |
| 1961 | CONTIG84 | 172135 | 172479 | 1.39 | 1.44E-01 | transcription_start_site | - | 171357 | 171357 | -950  | 20425 | AN4906 |
| 1961 | CONTIG84 | 172135 | 172479 | 1.39 | 1.44E-01 | transcription_start_site | - | 170646 | 170646 | -1661 | 20426 | AN4906 |

|      |          |        |        |      |          |                          |   |        |        |       |       |        |
|------|----------|--------|--------|------|----------|--------------------------|---|--------|--------|-------|-------|--------|
| 1961 | CONTIG84 | 172135 | 172479 | 1.39 | 1.44E-01 | transcription_start_site | - | 170538 | 170538 | -1769 | 20427 | AN4906 |
| 2098 | CONTIG84 | 181064 | 181496 | 1.34 | 1.66E-01 | transcription_start_site | - | 176085 | 176085 | -5195 | 20428 | AN4907 |
| 1302 | CONTIG84 | 185329 | 186432 | 1.7  | 5.88E-02 | transcription_start_site | - | 180837 | 180837 | -5043 | 20429 | AN4908 |
| 1302 | CONTIG84 | 185329 | 186432 | 1.7  | 5.88E-02 | transcription_start_site | - | 180751 | 180751 | -5129 | 20430 | AN4908 |
| 1302 | CONTIG84 | 185329 | 186432 | 1.7  | 5.88E-02 | transcription_start_site | - | 180619 | 180619 | -5261 | 20431 | AN4908 |
| 1302 | CONTIG84 | 185329 | 186432 | 1.7  | 5.88E-02 | transcription_start_site | - | 180505 | 180505 | -5375 | 20432 | AN4908 |
| 2098 | CONTIG84 | 181064 | 181496 | 1.34 | 1.66E-01 | transcription_start_site | - | 180837 | 180837 | -443  | 20429 | AN4908 |
| 2098 | CONTIG84 | 181064 | 181496 | 1.34 | 1.66E-01 | transcription_start_site | - | 180751 | 180751 | -529  | 20430 | AN4908 |
| 2098 | CONTIG84 | 181064 | 181496 | 1.34 | 1.66E-01 | transcription_start_site | - | 180619 | 180619 | -661  | 20431 | AN4908 |
| 2098 | CONTIG84 | 181064 | 181496 | 1.34 | 1.66E-01 | transcription_start_site | - | 180505 | 180505 | -775  | 20432 | AN4908 |
| 2098 | CONTIG84 | 181064 | 181496 | 1.34 | 1.66E-01 | transcription_start_site | - | 179254 | 179254 | -2026 | 20433 | AN4908 |
| 1302 | CONTIG84 | 185329 | 186432 | 1.7  | 5.88E-02 | transcription_start_site | - | 182141 | 182141 | -3739 | 20434 | AN4909 |
| 1302 | CONTIG84 | 185329 | 186432 | 1.7  | 5.88E-02 | transcription_start_site | - | 182053 | 182053 | -3827 | 20435 | AN4909 |
| 1302 | CONTIG84 | 185329 | 186432 | 1.7  | 5.88E-02 | transcription_start_site | - | 181919 | 181919 | -3961 | 20436 | AN4909 |
| 1302 | CONTIG84 | 185329 | 186432 | 1.7  | 5.88E-02 | transcription_start_site | - | 181588 | 181588 | -4292 | 20437 | AN4909 |
| 1302 | CONTIG84 | 185329 | 186432 | 1.7  | 5.88E-02 | transcription_start_site | - | 181367 | 181367 | -4513 | 20438 | AN4909 |
| 2098 | CONTIG84 | 181064 | 181496 | 1.34 | 1.66E-01 | transcription_start_site | - | 181367 | 181367 | 87    | 20438 | AN4909 |
| 2098 | CONTIG84 | 181064 | 181496 | 1.34 | 1.66E-01 | transcription_start_site | - | 181588 | 181588 | 308   | 20437 | AN4909 |
| 2098 | CONTIG84 | 181064 | 181496 | 1.34 | 1.66E-01 | transcription_start_site | - | 181919 | 181919 | 639   | 20436 | AN4909 |
| 2098 | CONTIG84 | 181064 | 181496 | 1.34 | 1.66E-01 | transcription_start_site | - | 182053 | 182053 | 773   | 20435 | AN4909 |
| 2098 | CONTIG84 | 181064 | 181496 | 1.34 | 1.66E-01 | transcription_start_site | - | 182141 | 182141 | 861   | 20434 | AN4909 |
| 1302 | CONTIG84 | 185329 | 186432 | 1.7  | 5.88E-02 | transcription_start_site | + | 184558 | 184558 | 1322  | 20443 | AN4910 |
| 2098 | CONTIG84 | 181064 | 181496 | 1.34 | 1.66E-01 | transcription_start_site | + | 183124 | 183124 | -1844 | 20439 | AN4910 |
| 2098 | CONTIG84 | 181064 | 181496 | 1.34 | 1.66E-01 | transcription_start_site | + | 183446 | 183446 | -2166 | 20440 | AN4910 |
| 2098 | CONTIG84 | 181064 | 181496 | 1.34 | 1.66E-01 | transcription_start_site | + | 183864 | 183864 | -2584 | 20441 | AN4910 |
| 2098 | CONTIG84 | 181064 | 181496 | 1.34 | 1.66E-01 | transcription_start_site | + | 184167 | 184167 | -2887 | 20442 | AN4910 |
| 2098 | CONTIG84 | 181064 | 181496 | 1.34 | 1.66E-01 | transcription_start_site | + | 184558 | 184558 | -3278 | 20443 | AN4910 |
| 1302 | CONTIG84 | 185329 | 186432 | 1.7  | 5.88E-02 | transcription_start_site | + | 186048 | 186048 | -167  | 20445 | AN4911 |
| 1302 | CONTIG84 | 185329 | 186432 | 1.7  | 5.88E-02 | transcription_start_site | + | 185690 | 185690 | 190   | 20444 | AN4911 |
| 2098 | CONTIG84 | 181064 | 181496 | 1.34 | 1.66E-01 | transcription_start_site | + | 185690 | 185690 | -4410 | 20444 | AN4911 |
| 2098 | CONTIG84 | 181064 | 181496 | 1.34 | 1.66E-01 | transcription_start_site | + | 186048 | 186048 | -4768 | 20445 | AN4911 |
| 795  | CONTIG84 | 208586 | 208925 | 2.11 | 1.57E-02 | transcription_start_site | - | 208991 | 208991 | 235   | 20470 | AN4917 |
| 795  | CONTIG84 | 208586 | 208925 | 2.11 | 1.57E-02 | transcription_start_site | - | 209570 | 209570 | 814   | 20469 | AN4917 |
| 795  | CONTIG84 | 208586 | 208925 | 2.11 | 1.57E-02 | transcription_start_site | + | 210243 | 210243 | -1487 | 20471 | AN4918 |
| 795  | CONTIG84 | 208586 | 208925 | 2.11 | 1.57E-02 | transcription_start_site | + | 210552 | 210552 | -1796 | 20472 | AN4918 |
| 1222 | CONTIG84 | 216996 | 217415 | 1.75 | 3.33E-02 | transcription_start_site | - | 212185 | 212185 | -5020 | 20473 | AN4919 |
| 1222 | CONTIG84 | 216996 | 217415 | 1.75 | 3.33E-02 | transcription_start_site | - | 216620 | 216620 | -585  | 20475 | AN4920 |
| 1222 | CONTIG84 | 216996 | 217415 | 1.75 | 3.33E-02 | transcription_start_site | - | 215670 | 215670 | -1535 | 20476 | AN4920 |
| 1222 | CONTIG84 | 216996 | 217415 | 1.75 | 3.33E-02 | transcription_start_site | - | 215186 | 215186 | -2019 | 20477 | AN4920 |
| 1222 | CONTIG84 | 216996 | 217415 | 1.75 | 3.33E-02 | transcription_start_site | - | 214994 | 214994 | -2211 | 20478 | AN4920 |
| 1222 | CONTIG84 | 216996 | 217415 | 1.75 | 3.33E-02 | transcription_start_site | + | 220432 | 220432 | -3226 | 20479 | AN4921 |
| 1222 | CONTIG84 | 216996 | 217415 | 1.75 | 3.33E-02 | transcription_start_site | + | 221610 | 221610 | -4404 | 20480 | AN4921 |
| 2246 | CONTIG84 | 227487 | 227981 | 1.29 | 1.93E-01 | transcription_start_site | - | 224496 | 224496 | -3238 | 20481 | AN4922 |
| 2246 | CONTIG84 | 227487 | 227981 | 1.29 | 1.93E-01 | transcription_start_site | - | 223551 | 223551 | -4183 | 20482 | AN4922 |
| 2246 | CONTIG84 | 227487 | 227981 | 1.29 | 1.93E-01 | transcription_start_site | - | 227439 | 227439 | -295  | 20483 | AN4923 |
| 2246 | CONTIG84 | 227487 | 227981 | 1.29 | 1.93E-01 | transcription_start_site | - | 227221 | 227221 | -513  | 20484 | AN4923 |
| 2246 | CONTIG84 | 227487 | 227981 | 1.29 | 1.93E-01 | transcription_start_site | + | 231186 | 231186 | -3452 | 20487 | AN4925 |
| 1962 | CONTIG84 | 238217 | 238626 | 1.39 | 1.44E-01 | transcription_start_site | - | 238637 | 238637 | 215   | 20489 | AN4926 |
| 1962 | CONTIG84 | 238217 | 238626 | 1.39 | 1.44E-01 | transcription_start_site | - | 237726 | 237726 | -695  | 20490 | AN4926 |
| 1962 | CONTIG84 | 238217 | 238626 | 1.39 | 1.44E-01 | transcription_start_site | - | 236108 | 236108 | -2313 | 20491 | AN4926 |
| 1962 | CONTIG84 | 238217 | 238626 | 1.39 | 1.44E-01 | transcription_start_site | + | 242652 | 242652 | -4230 | 20495 | AN4928 |
| 729  | CONTIG84 | 249231 | 249880 | 2.17 | 4.13E-03 | transcription_start_site | - | 247347 | 247347 | -2208 | 20496 | AN4929 |
| 729  | CONTIG84 | 249231 | 249880 | 2.17 | 4.13E-03 | transcription_start_site | - | 246358 | 246358 | -3197 | 20497 | AN4929 |
| 1223 | CONTIG84 | 248029 | 248391 | 1.75 | 5.22E-02 | transcription_start_site | - | 247347 | 247347 | -863  | 20496 | AN4929 |
| 1223 | CONTIG84 | 248029 | 248391 | 1.75 | 5.22E-02 | transcription_start_site | - | 246358 | 246358 | -1852 | 20497 | AN4929 |
| 729  | CONTIG84 | 249231 | 249880 | 2.17 | 4.13E-03 | transcription_start_site | + | 253493 | 253493 | -3937 | 20498 | AN4930 |
| 729  | CONTIG84 | 249231 | 249880 | 2.17 | 4.13E-03 | transcription_start_site | + | 254637 | 254637 | -5081 | 20499 | AN4930 |

|      |          |        |        |      |          |                          |   |        |        |       |       |        |
|------|----------|--------|--------|------|----------|--------------------------|---|--------|--------|-------|-------|--------|
| 136  | CONTIG84 | 264979 | 265628 | 3.09 | 2.16E-04 | transcription_start_site | - | 263173 | 263173 | -2130 | 20509 | AN4935 |
| 136  | CONTIG84 | 264979 | 265628 | 3.09 | 2.16E-04 | transcription_start_site | - | 262460 | 262460 | -2843 | 20510 | AN4935 |
| 446  | CONTIG84 | 263869 | 264138 | 2.53 | 3.61E-03 | transcription_start_site | - | 263173 | 263173 | -830  | 20509 | AN4935 |
| 446  | CONTIG84 | 263869 | 264138 | 2.53 | 3.61E-03 | transcription_start_site | - | 262460 | 262460 | -1543 | 20510 | AN4935 |
| 955  | CONTIG84 | 263034 | 263384 | 1.96 | 2.62E-02 | transcription_start_site | - | 263173 | 263173 | -36   | 20509 | AN4935 |
| 955  | CONTIG84 | 263034 | 263384 | 1.96 | 2.62E-02 | transcription_start_site | - | 262460 | 262460 | -749  | 20510 | AN4935 |
| 383  | CONTIG84 | 270766 | 271030 | 2.63 | 2.22E-03 | transcription_start_site | - | 268912 | 268912 | -1986 | 20511 | AN4936 |
| 383  | CONTIG84 | 270766 | 271030 | 2.63 | 2.22E-03 | transcription_start_site | - | 268165 | 268165 | -2733 | 20512 | AN4936 |
| 383  | CONTIG84 | 270766 | 271030 | 2.63 | 2.22E-03 | transcription_start_site | - | 267905 | 267905 | -2993 | 20513 | AN4936 |
| 136  | CONTIG84 | 264979 | 265628 | 3.09 | 2.16E-04 | transcription_start_site | + | 269374 | 269374 | -4070 | 20514 | AN4937 |
| 136  | CONTIG84 | 264979 | 265628 | 3.09 | 2.16E-04 | transcription_start_site | + | 269462 | 269462 | -4158 | 20515 | AN4937 |
| 136  | CONTIG84 | 264979 | 265628 | 3.09 | 2.16E-04 | transcription_start_site | + | 269616 | 269616 | -4312 | 20516 | AN4937 |
| 383  | CONTIG84 | 270766 | 271030 | 2.63 | 2.22E-03 | transcription_start_site | - | 271664 | 271664 | 766   | 20518 | AN4938 |
| 383  | CONTIG84 | 270766 | 271030 | 2.63 | 2.22E-03 | transcription_start_site | - | 271860 | 271860 | 962   | 20517 | AN4938 |
| 383  | CONTIG84 | 270766 | 271030 | 2.63 | 2.22E-03 | transcription_start_site | + | 274571 | 274571 | -3673 | 20519 | AN4939 |
| 383  | CONTIG84 | 270766 | 271030 | 2.63 | 2.22E-03 | transcription_start_site | + | 274638 | 274638 | -3740 | 20520 | AN4939 |
| 383  | CONTIG84 | 270766 | 271030 | 2.63 | 2.22E-03 | transcription_start_site | + | 274731 | 274731 | -3833 | 20521 | AN4939 |
| 383  | CONTIG84 | 270766 | 271030 | 2.63 | 2.22E-03 | transcription_start_site | + | 275043 | 275043 | -4145 | 20522 | AN4939 |
| 474  | CONTIG84 | 277746 | 278155 | 2.48 | 4.61E-03 | transcription_start_site | - | 277490 | 277490 | -460  | 20523 | AN4940 |
| 474  | CONTIG84 | 277746 | 278155 | 2.48 | 4.61E-03 | transcription_start_site | - | 277350 | 277350 | -600  | 20524 | AN4940 |
| 474  | CONTIG84 | 277746 | 278155 | 2.48 | 4.61E-03 | transcription_start_site | - | 277248 | 277248 | -702  | 20525 | AN4940 |
| 474  | CONTIG84 | 277746 | 278155 | 2.48 | 4.61E-03 | transcription_start_site | - | 277054 | 277054 | -896  | 20526 | AN4940 |
| 474  | CONTIG84 | 277746 | 278155 | 2.48 | 4.61E-03 | transcription_start_site | - | 276214 | 276214 | -1736 | 20527 | AN4940 |
| 474  | CONTIG84 | 277746 | 278155 | 2.48 | 4.61E-03 | transcription_start_site | + | 278273 | 278273 | -322  | 20528 | AN4941 |
| 474  | CONTIG84 | 277746 | 278155 | 2.48 | 4.61E-03 | transcription_start_site | + | 278388 | 278388 | -437  | 20529 | AN4941 |
| 474  | CONTIG84 | 277746 | 278155 | 2.48 | 4.61E-03 | transcription_start_site | + | 278697 | 278697 | -746  | 20530 | AN4941 |
| 956  | CONTIG84 | 285836 | 286342 | 1.96 | 2.62E-02 | transcription_start_site | - | 283294 | 283294 | -2795 | 20537 | AN4943 |
| 956  | CONTIG84 | 285836 | 286342 | 1.96 | 2.62E-02 | transcription_start_site | + | 286718 | 286718 | -629  | 20540 | AN4945 |
| 956  | CONTIG84 | 285836 | 286342 | 1.96 | 2.62E-02 | transcription_start_site | + | 289608 | 289608 | -3519 | 20541 | AN4946 |
| 956  | CONTIG84 | 285836 | 286342 | 1.96 | 2.62E-02 | transcription_start_site | + | 289824 | 289824 | -3735 | 20542 | AN4946 |
| 956  | CONTIG84 | 285836 | 286342 | 1.96 | 2.62E-02 | transcription_start_site | + | 290476 | 290476 | -4387 | 20543 | AN4947 |
| 956  | CONTIG84 | 285836 | 286342 | 1.96 | 2.62E-02 | transcription_start_site | + | 290670 | 290670 | -4581 | 20544 | AN4947 |
| 1582 | CONTIG84 | 328956 | 329380 | 1.55 | 9.24E-02 | transcription_start_site | - | 324080 | 324080 | -5088 | 20579 | AN4960 |
| 1582 | CONTIG84 | 328956 | 329380 | 1.55 | 9.24E-02 | transcription_start_site | - | 328418 | 328418 | -750  | 20592 | AN4963 |
| 2247 | CONTIG84 | 334666 | 335080 | 1.29 | 1.93E-01 | transcription_start_site | - | 331784 | 331784 | -3089 | 20586 | AN4963 |
| 2247 | CONTIG84 | 334666 | 335080 | 1.29 | 1.93E-01 | transcription_start_site | - | 331687 | 331687 | -3186 | 20587 | AN4963 |
| 2247 | CONTIG84 | 334666 | 335080 | 1.29 | 1.93E-01 | transcription_start_site | - | 331526 | 331526 | -3347 | 20588 | AN4963 |
| 2247 | CONTIG84 | 334666 | 335080 | 1.29 | 1.93E-01 | transcription_start_site | - | 331170 | 331170 | -3703 | 20589 | AN4963 |
| 2247 | CONTIG84 | 334666 | 335080 | 1.29 | 1.93E-01 | transcription_start_site | - | 330926 | 330926 | -3947 | 20590 | AN4963 |
| 2247 | CONTIG84 | 334666 | 335080 | 1.29 | 1.93E-01 | transcription_start_site | - | 330768 | 330768 | -4105 | 20591 | AN4963 |
| 1582 | CONTIG84 | 328956 | 329380 | 1.55 | 9.24E-02 | transcription_start_site | + | 332733 | 332733 | -3565 | 20593 | AN4964 |
| 1582 | CONTIG84 | 328956 | 329380 | 1.55 | 9.24E-02 | transcription_start_site | + | 332825 | 332825 | -3657 | 20594 | AN4964 |
| 2247 | CONTIG84 | 334666 | 335080 | 1.29 | 1.93E-01 | transcription_start_site | + | 334734 | 334734 | 139   | 20595 | AN4965 |
| 2247 | CONTIG84 | 334666 | 335080 | 1.29 | 1.93E-01 | transcription_start_site | + | 335499 | 335499 | -626  | 20596 | AN4965 |
| 2247 | CONTIG84 | 334666 | 335080 | 1.29 | 1.93E-01 | transcription_start_site | + | 335880 | 335880 | -1007 | 20597 | AN4965 |
| 28   | CONTIG84 | 365719 | 366213 | 3.56 | 0.00E+00 | transcription_start_site | - | 362115 | 362115 | -3851 | 20612 | AN4972 |
| 28   | CONTIG84 | 365719 | 366213 | 3.56 | 0.00E+00 | transcription_start_site | - | 361680 | 361680 | -4286 | 20613 | AN4972 |
| 28   | CONTIG84 | 365719 | 366213 | 3.56 | 0.00E+00 | transcription_start_site | - | 361514 | 361514 | -4452 | 20614 | AN4972 |
| 28   | CONTIG84 | 365719 | 366213 | 3.56 | 0.00E+00 | transcription_start_site | - | 360729 | 360729 | -5237 | 20615 | AN4972 |
| 249  | CONTIG84 | 365038 | 365688 | 2.84 | 1.01E-03 | transcription_start_site | - | 362115 | 362115 | -3248 | 20612 | AN4972 |
| 249  | CONTIG84 | 365038 | 365688 | 2.84 | 1.01E-03 | transcription_start_site | - | 361680 | 361680 | -3683 | 20613 | AN4972 |
| 249  | CONTIG84 | 365038 | 365688 | 2.84 | 1.01E-03 | transcription_start_site | - | 361514 | 361514 | -3849 | 20614 | AN4972 |
| 249  | CONTIG84 | 365038 | 365688 | 2.84 | 1.01E-03 | transcription_start_site | - | 360729 | 360729 | -4634 | 20615 | AN4972 |
| 28   | CONTIG84 | 365719 | 366213 | 3.56 | 0.00E+00 | transcription_start_site | - | 364628 | 364628 | -1338 | 20616 | AN4973 |
| 28   | CONTIG84 | 365719 | 366213 | 3.56 | 0.00E+00 | transcription_start_site | - | 364140 | 364140 | -1826 | 20617 | AN4973 |
| 249  | CONTIG84 | 365038 | 365688 | 2.84 | 1.01E-03 | transcription_start_site | - | 364628 | 364628 | -735  | 20616 | AN4973 |
| 249  | CONTIG84 | 365038 | 365688 | 2.84 | 1.01E-03 | transcription_start_site | - | 364140 | 364140 | -1223 | 20617 | AN4973 |



|      |          |        |        |      |          |                          |   |        |        |       |       |        |
|------|----------|--------|--------|------|----------|--------------------------|---|--------|--------|-------|-------|--------|
| 1583 | CONTIG84 | 369609 | 370118 | 1.55 | 9.24E-02 | transcription_start_site | - | 364628 | 364628 | -5235 | 20616 | AN4973 |
| 1701 | CONTIG84 | 367739 | 368613 | 1.5  | 8.36E-02 | transcription_start_site | - | 364628 | 364628 | -3548 | 20616 | AN4973 |
| 1701 | CONTIG84 | 367739 | 368613 | 1.5  | 8.36E-02 | transcription_start_site | - | 364140 | 364140 | -4036 | 20617 | AN4973 |
| 288  | CONTIG84 | 372908 | 373192 | 2.78 | 1.22E-03 | transcription_start_site | - | 368654 | 368654 | -4396 | 20618 | AN4974 |
| 288  | CONTIG84 | 372908 | 373192 | 2.78 | 1.22E-03 | transcription_start_site | - | 368489 | 368489 | -4561 | 20619 | AN4974 |
| 1583 | CONTIG84 | 369609 | 370118 | 1.55 | 9.24E-02 | transcription_start_site | - | 368654 | 368654 | -1209 | 20618 | AN4974 |
| 1583 | CONTIG84 | 369609 | 370118 | 1.55 | 9.24E-02 | transcription_start_site | - | 368489 | 368489 | -1374 | 20619 | AN4974 |
| 1701 | CONTIG84 | 367739 | 368613 | 1.5  | 8.36E-02 | transcription_start_site | - | 368489 | 368489 | 313   | 20619 | AN4974 |
| 1701 | CONTIG84 | 367739 | 368613 | 1.5  | 8.36E-02 | transcription_start_site | - | 368654 | 368654 | 478   | 20618 | AN4974 |
| 28   | CONTIG84 | 365719 | 366213 | 3.56 | 0.00E+00 | transcription_start_site | + | 368981 | 368981 | -3015 | 20620 | AN4975 |
| 28   | CONTIG84 | 365719 | 366213 | 3.56 | 0.00E+00 | transcription_start_site | + | 369125 | 369125 | -3159 | 20621 | AN4975 |
| 28   | CONTIG84 | 365719 | 366213 | 3.56 | 0.00E+00 | transcription_start_site | + | 370173 | 370173 | -4207 | 20622 | AN4975 |
| 249  | CONTIG84 | 365038 | 365688 | 2.84 | 1.01E-03 | transcription_start_site | + | 368981 | 368981 | -3618 | 20620 | AN4975 |
| 249  | CONTIG84 | 365038 | 365688 | 2.84 | 1.01E-03 | transcription_start_site | + | 369125 | 369125 | -3762 | 20621 | AN4975 |
| 249  | CONTIG84 | 365038 | 365688 | 2.84 | 1.01E-03 | transcription_start_site | + | 370173 | 370173 | -4810 | 20622 | AN4975 |
| 1583 | CONTIG84 | 369609 | 370118 | 1.55 | 9.24E-02 | transcription_start_site | + | 370173 | 370173 | -309  | 20622 | AN4975 |
| 1583 | CONTIG84 | 369609 | 370118 | 1.55 | 9.24E-02 | transcription_start_site | + | 369125 | 369125 | 738   | 20621 | AN4975 |
| 1583 | CONTIG84 | 369609 | 370118 | 1.55 | 9.24E-02 | transcription_start_site | + | 368981 | 368981 | 882   | 20620 | AN4975 |
| 1701 | CONTIG84 | 367739 | 368613 | 1.5  | 8.36E-02 | transcription_start_site | + | 368981 | 368981 | -805  | 20620 | AN4975 |
| 1701 | CONTIG84 | 367739 | 368613 | 1.5  | 8.36E-02 | transcription_start_site | + | 369125 | 369125 | -949  | 20621 | AN4975 |
| 1701 | CONTIG84 | 367739 | 368613 | 1.5  | 8.36E-02 | transcription_start_site | + | 370173 | 370173 | -1997 | 20622 | AN4975 |
| 288  | CONTIG84 | 372908 | 373192 | 2.78 | 1.22E-03 | transcription_start_site | - | 372220 | 372220 | -830  | 20623 | AN4976 |
| 288  | CONTIG84 | 372908 | 373192 | 2.78 | 1.22E-03 | transcription_start_site | - | 371869 | 371869 | -1181 | 20624 | AN4976 |
| 288  | CONTIG84 | 372908 | 373192 | 2.78 | 1.22E-03 | transcription_start_site | - | 371711 | 371711 | -1339 | 20625 | AN4976 |
| 475  | CONTIG84 | 376655 | 376941 | 2.48 | 4.61E-03 | transcription_start_site | - | 372220 | 372220 | -4578 | 20623 | AN4976 |
| 475  | CONTIG84 | 376655 | 376941 | 2.48 | 4.61E-03 | transcription_start_site | - | 371869 | 371869 | -4929 | 20624 | AN4976 |
| 475  | CONTIG84 | 376655 | 376941 | 2.48 | 4.61E-03 | transcription_start_site | - | 371711 | 371711 | -5087 | 20625 | AN4976 |
| 1374 | CONTIG84 | 373963 | 374452 | 1.65 | 6.84E-02 | transcription_start_site | - | 372220 | 372220 | -1987 | 20623 | AN4976 |
| 1374 | CONTIG84 | 373963 | 374452 | 1.65 | 6.84E-02 | transcription_start_site | - | 371869 | 371869 | -2338 | 20624 | AN4976 |
| 1374 | CONTIG84 | 373963 | 374452 | 1.65 | 6.84E-02 | transcription_start_site | - | 371711 | 371711 | -2496 | 20625 | AN4976 |
| 288  | CONTIG84 | 372908 | 373192 | 2.78 | 1.22E-03 | transcription_start_site | + | 374527 | 374527 | -1477 | 20626 | AN4977 |
| 288  | CONTIG84 | 372908 | 373192 | 2.78 | 1.22E-03 | transcription_start_site | + | 374893 | 374893 | -1843 | 20627 | AN4977 |
| 288  | CONTIG84 | 372908 | 373192 | 2.78 | 1.22E-03 | transcription_start_site | + | 376468 | 376468 | -3418 | 20628 | AN4977 |
| 475  | CONTIG84 | 376655 | 376941 | 2.48 | 4.61E-03 | transcription_start_site | + | 376468 | 376468 | 330   | 20628 | AN4977 |
| 1374 | CONTIG84 | 373963 | 374452 | 1.65 | 6.84E-02 | transcription_start_site | + | 374527 | 374527 | -319  | 20626 | AN4977 |
| 1374 | CONTIG84 | 373963 | 374452 | 1.65 | 6.84E-02 | transcription_start_site | + | 374893 | 374893 | -685  | 20627 | AN4977 |
| 1374 | CONTIG84 | 373963 | 374452 | 1.65 | 6.84E-02 | transcription_start_site | + | 376468 | 376468 | -2260 | 20628 | AN4977 |
| 1583 | CONTIG84 | 369609 | 370118 | 1.55 | 9.24E-02 | transcription_start_site | + | 374527 | 374527 | -4663 | 20626 | AN4977 |
| 1583 | CONTIG84 | 369609 | 370118 | 1.55 | 9.24E-02 | transcription_start_site | + | 374893 | 374893 | -5029 | 20627 | AN4977 |
| 288  | CONTIG84 | 372908 | 373192 | 2.78 | 1.22E-03 | transcription_start_site | + | 377474 | 377474 | -4424 | 20629 | AN4978 |
| 288  | CONTIG84 | 372908 | 373192 | 2.78 | 1.22E-03 | transcription_start_site | + | 377877 | 377877 | -4827 | 20630 | AN4978 |
| 288  | CONTIG84 | 372908 | 373192 | 2.78 | 1.22E-03 | transcription_start_site | + | 378056 | 378056 | -5006 | 20631 | AN4978 |
| 288  | CONTIG84 | 372908 | 373192 | 2.78 | 1.22E-03 | transcription_start_site | + | 378116 | 378116 | -5066 | 20632 | AN4978 |
| 475  | CONTIG84 | 376655 | 376941 | 2.48 | 4.61E-03 | transcription_start_site | + | 377474 | 377474 | -676  | 20629 | AN4978 |
| 475  | CONTIG84 | 376655 | 376941 | 2.48 | 4.61E-03 | transcription_start_site | + | 377877 | 377877 | -1079 | 20630 | AN4978 |
| 475  | CONTIG84 | 376655 | 376941 | 2.48 | 4.61E-03 | transcription_start_site | + | 378056 | 378056 | -1258 | 20631 | AN4978 |
| 475  | CONTIG84 | 376655 | 376941 | 2.48 | 4.61E-03 | transcription_start_site | + | 378116 | 378116 | -1318 | 20632 | AN4978 |
| 475  | CONTIG84 | 376655 | 376941 | 2.48 | 4.61E-03 | transcription_start_site | + | 378659 | 378659 | -1861 | 20633 | AN4978 |
| 475  | CONTIG84 | 376655 | 376941 | 2.48 | 4.61E-03 | transcription_start_site | + | 378787 | 378787 | -1989 | 20634 | AN4978 |
| 475  | CONTIG84 | 376655 | 376941 | 2.48 | 4.61E-03 | transcription_start_site | + | 378943 | 378943 | -2145 | 20635 | AN4978 |
| 1374 | CONTIG84 | 373963 | 374452 | 1.65 | 6.84E-02 | transcription_start_site | + | 377474 | 377474 | -3266 | 20629 | AN4978 |
| 1374 | CONTIG84 | 373963 | 374452 | 1.65 | 6.84E-02 | transcription_start_site | + | 377877 | 377877 | -3669 | 20630 | AN4978 |
| 1374 | CONTIG84 | 373963 | 374452 | 1.65 | 6.84E-02 | transcription_start_site | + | 378056 | 378056 | -3848 | 20631 | AN4978 |
| 1374 | CONTIG84 | 373963 | 374452 | 1.65 | 6.84E-02 | transcription_start_site | + | 378116 | 378116 | -3908 | 20632 | AN4978 |
| 1374 | CONTIG84 | 373963 | 374452 | 1.65 | 6.84E-02 | transcription_start_site | + | 378659 | 378659 | -4451 | 20633 | AN4978 |
| 1374 | CONTIG84 | 373963 | 374452 | 1.65 | 6.84E-02 | transcription_start_site | + | 378787 | 378787 | -4579 | 20634 | AN4978 |
| 1374 | CONTIG84 | 373963 | 374452 | 1.65 | 6.84E-02 | transcription_start_site | + | 378943 | 378943 | -4735 | 20635 | AN4978 |

|      |          |        |        |      |          |                          |   |        |        |       |       |        |
|------|----------|--------|--------|------|----------|--------------------------|---|--------|--------|-------|-------|--------|
| 475  | CONTIG84 | 376655 | 376941 | 2.48 | 4.61E-03 | transcription_start_site | + | 380005 | 380005 | -3207 | 20636 | AN4979 |
| 475  | CONTIG84 | 376655 | 376941 | 2.48 | 4.61E-03 | transcription_start_site | + | 380939 | 380939 | -4141 | 20637 | AN4979 |
| 321  | CONTIG84 | 396230 | 396819 | 2.73 | 0.00E+00 | transcription_start_site | - | 395471 | 395471 | -1053 | 20644 | AN4984 |
| 796  | CONTIG84 | 395114 | 395544 | 2.11 | 1.57E-02 | transcription_start_site | - | 395471 | 395471 | 142   | 20644 | AN4984 |
| 66   | CONTIG84 | 407495 | 407979 | 3.35 | 0.00E+00 | transcription_start_site | - | 402654 | 402654 | -5083 | 20645 | AN4985 |
| 250  | CONTIG84 | 406595 | 407169 | 2.84 | 1.01E-03 | transcription_start_site | - | 402654 | 402654 | -4228 | 20645 | AN4985 |
| 1301 | CONTIG84 | 402695 | 403194 | 1.7  | 3.99E-02 | transcription_start_site | - | 402654 | 402654 | -290  | 20645 | AN4985 |
| 1301 | CONTIG84 | 402695 | 403194 | 1.7  | 3.99E-02 | transcription_start_site | + | 402976 | 402976 | -31   | 20646 | AN4986 |
| 1301 | CONTIG84 | 402695 | 403194 | 1.7  | 3.99E-02 | transcription_start_site | + | 403582 | 403582 | -637  | 20647 | AN4986 |
| 66   | CONTIG84 | 407495 | 407979 | 3.35 | 0.00E+00 | transcription_start_site | - | 405592 | 405592 | -2145 | 20648 | AN4987 |
| 250  | CONTIG84 | 406595 | 407169 | 2.84 | 1.01E-03 | transcription_start_site | - | 405592 | 405592 | -1290 | 20648 | AN4987 |
| 1146 | CONTIG84 | 408910 | 409334 | 1.8  | 4.36E-02 | transcription_start_site | - | 405592 | 405592 | -3530 | 20648 | AN4987 |
| 66   | CONTIG84 | 407495 | 407979 | 3.35 | 0.00E+00 | transcription_start_site | + | 407908 | 407908 | -171  | 20649 | AN4988 |
| 66   | CONTIG84 | 407495 | 407979 | 3.35 | 0.00E+00 | transcription_start_site | + | 408015 | 408015 | -278  | 20650 | AN4988 |
| 66   | CONTIG84 | 407495 | 407979 | 3.35 | 0.00E+00 | transcription_start_site | + | 408430 | 408430 | -693  | 20651 | AN4988 |
| 250  | CONTIG84 | 406595 | 407169 | 2.84 | 1.01E-03 | transcription_start_site | + | 407908 | 407908 | -1026 | 20649 | AN4988 |
| 250  | CONTIG84 | 406595 | 407169 | 2.84 | 1.01E-03 | transcription_start_site | + | 408015 | 408015 | -1133 | 20650 | AN4988 |
| 250  | CONTIG84 | 406595 | 407169 | 2.84 | 1.01E-03 | transcription_start_site | + | 408430 | 408430 | -1548 | 20651 | AN4988 |
| 1146 | CONTIG84 | 408910 | 409334 | 1.8  | 4.36E-02 | transcription_start_site | + | 408430 | 408430 | 692   | 20651 | AN4988 |
| 1146 | CONTIG84 | 408910 | 409334 | 1.8  | 4.36E-02 | transcription_start_site | + | 408015 | 408015 | 1107  | 20650 | AN4988 |
| 1301 | CONTIG84 | 402695 | 403194 | 1.7  | 3.99E-02 | transcription_start_site | + | 407908 | 407908 | -4963 | 20649 | AN4988 |
| 1301 | CONTIG84 | 402695 | 403194 | 1.7  | 3.99E-02 | transcription_start_site | + | 408015 | 408015 | -5070 | 20650 | AN4988 |
| 66   | CONTIG84 | 407495 | 407979 | 3.35 | 0.00E+00 | transcription_start_site | + | 411117 | 411117 | -3380 | 20652 | AN4989 |
| 66   | CONTIG84 | 407495 | 407979 | 3.35 | 0.00E+00 | transcription_start_site | + | 411406 | 411406 | -3669 | 20653 | AN4989 |
| 66   | CONTIG84 | 407495 | 407979 | 3.35 | 0.00E+00 | transcription_start_site | + | 411604 | 411604 | -3867 | 20654 | AN4989 |
| 250  | CONTIG84 | 406595 | 407169 | 2.84 | 1.01E-03 | transcription_start_site | + | 411117 | 411117 | -4235 | 20652 | AN4989 |
| 250  | CONTIG84 | 406595 | 407169 | 2.84 | 1.01E-03 | transcription_start_site | + | 411406 | 411406 | -4524 | 20653 | AN4989 |
| 250  | CONTIG84 | 406595 | 407169 | 2.84 | 1.01E-03 | transcription_start_site | + | 411604 | 411604 | -4722 | 20654 | AN4989 |
| 1146 | CONTIG84 | 408910 | 409334 | 1.8  | 4.36E-02 | transcription_start_site | + | 411117 | 411117 | -1995 | 20652 | AN4989 |
| 1146 | CONTIG84 | 408910 | 409334 | 1.8  | 4.36E-02 | transcription_start_site | + | 411406 | 411406 | -2284 | 20653 | AN4989 |
| 1146 | CONTIG84 | 408910 | 409334 | 1.8  | 4.36E-02 | transcription_start_site | + | 411604 | 411604 | -2482 | 20654 | AN4989 |
| 1146 | CONTIG84 | 408910 | 409334 | 1.8  | 4.36E-02 | transcription_start_site | + | 413152 | 413152 | -4030 | 20655 | AN4990 |
| 1146 | CONTIG84 | 408910 | 409334 | 1.8  | 4.36E-02 | transcription_start_site | + | 413547 | 413547 | -4425 | 20656 | AN4990 |
| 1147 | CONTIG84 | 413645 | 413994 | 1.8  | 4.36E-02 | transcription_start_site | + | 413547 | 413547 | 272   | 20656 | AN4990 |
| 1147 | CONTIG84 | 413645 | 413994 | 1.8  | 4.36E-02 | transcription_start_site | + | 413152 | 413152 | 667   | 20655 | AN4990 |
| 417  | CONTIG84 | 417242 | 418101 | 2.58 | 3.03E-03 | transcription_start_site | + | 418807 | 418807 | -1135 | 20657 | AN4991 |
| 417  | CONTIG84 | 417242 | 418101 | 2.58 | 3.03E-03 | transcription_start_site | + | 419285 | 419285 | -1613 | 20658 | AN4991 |
| 1147 | CONTIG84 | 413645 | 413994 | 1.8  | 4.36E-02 | transcription_start_site | + | 418807 | 418807 | -4987 | 20657 | AN4991 |
| 2248 | CONTIG84 | 415890 | 416233 | 1.29 | 1.93E-01 | transcription_start_site | + | 418807 | 418807 | -2745 | 20657 | AN4991 |
| 2248 | CONTIG84 | 415890 | 416233 | 1.29 | 1.93E-01 | transcription_start_site | + | 419285 | 419285 | -3223 | 20658 | AN4991 |
| 1963 | CONTIG84 | 422344 | 422603 | 1.39 | 1.44E-01 | transcription_start_site | - | 421786 | 421786 | -687  | 20661 | AN4992 |
| 1963 | CONTIG84 | 422344 | 422603 | 1.39 | 1.44E-01 | transcription_start_site | - | 423253 | 423253 | 779   | 20660 | AN4992 |
| 1963 | CONTIG84 | 422344 | 422603 | 1.39 | 1.44E-01 | transcription_start_site | + | 423944 | 423944 | -1470 | 20662 | AN4993 |
| 1963 | CONTIG84 | 422344 | 422603 | 1.39 | 1.44E-01 | transcription_start_site | + | 424425 | 424425 | -1951 | 20663 | AN4993 |
| 629  | CONTIG84 | 439657 | 439926 | 2.27 | 8.81E-03 | transcription_start_site | - | 437543 | 437543 | -2248 | 20672 | AN4998 |
| 629  | CONTIG84 | 439657 | 439926 | 2.27 | 8.81E-03 | transcription_start_site | - | 437372 | 437372 | -2419 | 20673 | AN4998 |
| 629  | CONTIG84 | 439657 | 439926 | 2.27 | 8.81E-03 | transcription_start_site | - | 437184 | 437184 | -2607 | 20674 | AN4998 |
| 629  | CONTIG84 | 439657 | 439926 | 2.27 | 8.81E-03 | transcription_start_site | - | 440442 | 440442 | 650   | 20678 | AN4999 |
| 629  | CONTIG84 | 439657 | 439926 | 2.27 | 8.81E-03 | transcription_start_site | - | 440636 | 440636 | 844   | 20677 | AN4999 |
| 629  | CONTIG84 | 439657 | 439926 | 2.27 | 8.81E-03 | transcription_start_site | + | 441951 | 441951 | -2159 | 20679 | AN5000 |
| 629  | CONTIG84 | 439657 | 439926 | 2.27 | 8.81E-03 | transcription_start_site | + | 442243 | 442243 | -2451 | 20680 | AN5000 |
| 629  | CONTIG84 | 439657 | 439926 | 2.27 | 8.81E-03 | transcription_start_site | + | 442521 | 442521 | -2729 | 20681 | AN5000 |
| 629  | CONTIG84 | 439657 | 439926 | 2.27 | 8.81E-03 | transcription_start_site | + | 442694 | 442694 | -2902 | 20682 | AN5000 |
| 629  | CONTIG84 | 439657 | 439926 | 2.27 | 8.81E-03 | transcription_start_site | + | 443934 | 443934 | -4142 | 20683 | AN5001 |
| 1707 | CONTIG84 | 447762 | 448101 | 1.5  | 1.08E-01 | transcription_start_site | + | 446799 | 446799 | 1132  | 20684 | AN5001 |
| 1707 | CONTIG84 | 447762 | 448101 | 1.5  | 1.08E-01 | transcription_start_site | + | 449695 | 449695 | -1763 | 20685 | AN5002 |
| 1707 | CONTIG84 | 447762 | 448101 | 1.5  | 1.08E-01 | transcription_start_site | + | 450002 | 450002 | -2070 | 20686 | AN5002 |

|      |          |        |        |      |          |                          |   |        |        |       |       |        |
|------|----------|--------|--------|------|----------|--------------------------|---|--------|--------|-------|-------|--------|
| 1707 | CONTIG84 | 447762 | 448101 | 1.5  | 1.08E-01 | transcription_start_site | + | 450261 | 450261 | -2329 | 20687 | AN5002 |
| 57   | CONTIG84 | 451592 | 452156 | 3.4  | 0.00E+00 | transcription_start_site | + | 454782 | 454782 | -2908 | 20688 | AN5003 |
| 58   | CONTIG84 | 452177 | 453651 | 3.4  | 0.00E+00 | transcription_start_site | + | 454782 | 454782 | -1868 | 20688 | AN5003 |
| 1708 | CONTIG84 | 455251 | 456808 | 1.5  | 1.08E-01 | transcription_start_site | + | 454782 | 454782 | 1247  | 20688 | AN5003 |
| 58   | CONTIG84 | 452177 | 453651 | 3.4  | 0.00E+00 | transcription_start_site | + | 457755 | 457755 | -4841 | 20689 | AN5004 |
| 58   | CONTIG84 | 452177 | 453651 | 3.4  | 0.00E+00 | transcription_start_site | + | 457945 | 457945 | -5031 | 20690 | AN5004 |
| 58   | CONTIG84 | 452177 | 453651 | 3.4  | 0.00E+00 | transcription_start_site | + | 458105 | 458105 | -5191 | 20691 | AN5004 |
| 1708 | CONTIG84 | 455251 | 456808 | 1.5  | 1.08E-01 | transcription_start_site | + | 457755 | 457755 | -1725 | 20689 | AN5004 |
| 1708 | CONTIG84 | 455251 | 456808 | 1.5  | 1.08E-01 | transcription_start_site | + | 457945 | 457945 | -1915 | 20690 | AN5004 |
| 1708 | CONTIG84 | 455251 | 456808 | 1.5  | 1.08E-01 | transcription_start_site | + | 458105 | 458105 | -2075 | 20691 | AN5004 |
| 1708 | CONTIG84 | 455251 | 456808 | 1.5  | 1.08E-01 | transcription_start_site | + | 458956 | 458956 | -2926 | 20692 | AN5005 |
| 2244 | CONTIG84 | 459826 | 460255 | 1.29 | 1.79E-01 | transcription_start_site | + | 458956 | 458956 | 1084  | 20692 | AN5005 |
| 1480 | CONTIG84 | 474905 | 475271 | 1.6  | 6.16E-02 | transcription_start_site | - | 474723 | 474723 | -365  | 20700 | AN5009 |
| 1480 | CONTIG84 | 474905 | 475271 | 1.6  | 6.16E-02 | transcription_start_site | - | 473416 | 473416 | -1672 | 20701 | AN5009 |
| 1480 | CONTIG84 | 474905 | 475271 | 1.6  | 6.16E-02 | transcription_start_site | - | 473179 | 473179 | -1909 | 20702 | AN5009 |
| 1480 | CONTIG84 | 474905 | 475271 | 1.6  | 6.16E-02 | transcription_start_site | - | 472643 | 472643 | -2445 | 20703 | AN5009 |
| 1480 | CONTIG84 | 474905 | 475271 | 1.6  | 6.16E-02 | transcription_start_site | - | 472465 | 472465 | -2623 | 20704 | AN5009 |
| 1480 | CONTIG84 | 474905 | 475271 | 1.6  | 6.16E-02 | transcription_start_site | - | 472373 | 472373 | -2715 | 20705 | AN5009 |
| 1480 | CONTIG84 | 474905 | 475271 | 1.6  | 6.16E-02 | transcription_start_site | + | 478130 | 478130 | -3042 | 20707 | AN5011 |
| 1480 | CONTIG84 | 474905 | 475271 | 1.6  | 6.16E-02 | transcription_start_site | + | 478222 | 478222 | -3134 | 20708 | AN5011 |
| 1480 | CONTIG84 | 474905 | 475271 | 1.6  | 6.16E-02 | transcription_start_site | + | 478823 | 478823 | -3735 | 20709 | AN5011 |
| 1480 | CONTIG84 | 474905 | 475271 | 1.6  | 6.16E-02 | transcription_start_site | + | 479053 | 479053 | -3965 | 20710 | AN5011 |
| 1480 | CONTIG84 | 474905 | 475271 | 1.6  | 6.16E-02 | transcription_start_site | + | 479146 | 479146 | -4058 | 20711 | AN5011 |
| 1480 | CONTIG84 | 474905 | 475271 | 1.6  | 6.16E-02 | transcription_start_site | + | 479283 | 479283 | -4195 | 20712 | AN5011 |
| 1964 | CONTIG84 | 485261 | 485766 | 1.39 | 1.44E-01 | transcription_start_site | + | 485423 | 485423 | 90    | 20724 | AN5012 |
| 1964 | CONTIG84 | 485261 | 485766 | 1.39 | 1.44E-01 | transcription_start_site | + | 485283 | 485283 | 230   | 20723 | AN5012 |
| 1964 | CONTIG84 | 485261 | 485766 | 1.39 | 1.44E-01 | transcription_start_site | + | 485745 | 485745 | -231  | 20725 | AN5012 |
| 1964 | CONTIG84 | 485261 | 485766 | 1.39 | 1.44E-01 | transcription_start_site | + | 485213 | 485213 | 300   | 20722 | AN5012 |
| 1964 | CONTIG84 | 485261 | 485766 | 1.39 | 1.44E-01 | transcription_start_site | + | 485083 | 485083 | 430   | 20721 | AN5012 |
| 1964 | CONTIG84 | 485261 | 485766 | 1.39 | 1.44E-01 | transcription_start_site | + | 484807 | 484807 | 706   | 20720 | AN5012 |
| 1964 | CONTIG84 | 485261 | 485766 | 1.39 | 1.44E-01 | transcription_start_site | + | 486269 | 486269 | -755  | 20726 | AN5012 |
| 1964 | CONTIG84 | 485261 | 485766 | 1.39 | 1.44E-01 | transcription_start_site | + | 484638 | 484638 | 875   | 20719 | AN5012 |
| 1964 | CONTIG84 | 485261 | 485766 | 1.39 | 1.44E-01 | transcription_start_site | + | 489071 | 489071 | -3557 | 20727 | AN5013 |
| 203  | CONTIG84 | 494346 | 494836 | 2.94 | 8.69E-04 | transcription_start_site | - | 492012 | 492012 | -2579 | 20728 | AN5014 |
| 203  | CONTIG84 | 494346 | 494836 | 2.94 | 8.69E-04 | transcription_start_site | - | 491805 | 491805 | -2786 | 20729 | AN5014 |
| 203  | CONTIG84 | 494346 | 494836 | 2.94 | 8.69E-04 | transcription_start_site | - | 491503 | 491503 | -3088 | 20730 | AN5014 |
| 203  | CONTIG84 | 494346 | 494836 | 2.94 | 8.69E-04 | transcription_start_site | + | 494859 | 494859 | -268  | 20731 | AN5015 |
| 203  | CONTIG84 | 494346 | 494836 | 2.94 | 8.69E-04 | transcription_start_site | + | 495065 | 495065 | -474  | 20732 | AN5015 |
| 1148 | CONTIG84 | 499727 | 500016 | 1.8  | 4.36E-02 | transcription_start_site | - | 497230 | 497230 | -2641 | 20733 | AN5016 |
| 1148 | CONTIG84 | 499727 | 500016 | 1.8  | 4.36E-02 | transcription_start_site | - | 496910 | 496910 | -2961 | 20734 | AN5016 |
| 1148 | CONTIG84 | 499727 | 500016 | 1.8  | 4.36E-02 | transcription_start_site | - | 496446 | 496446 | -3425 | 20735 | AN5016 |
| 1148 | CONTIG84 | 499727 | 500016 | 1.8  | 4.36E-02 | transcription_start_site | - | 499396 | 499396 | -475  | 20736 | AN5017 |
| 1148 | CONTIG84 | 499727 | 500016 | 1.8  | 4.36E-02 | transcription_start_site | - | 499045 | 499045 | -826  | 20737 | AN5017 |
| 1709 | CONTIG84 | 511726 | 512005 | 1.5  | 1.08E-01 | transcription_start_site | - | 508272 | 508272 | -3593 | 20745 | AN5020 |
| 1709 | CONTIG84 | 511726 | 512005 | 1.5  | 1.08E-01 | transcription_start_site | - | 508120 | 508120 | -3745 | 20746 | AN5020 |
| 1709 | CONTIG84 | 511726 | 512005 | 1.5  | 1.08E-01 | transcription_start_site | - | 507909 | 507909 | -3956 | 20747 | AN5020 |
| 1709 | CONTIG84 | 511726 | 512005 | 1.5  | 1.08E-01 | transcription_start_site | - | 507711 | 507711 | -4154 | 20748 | AN5020 |
| 1709 | CONTIG84 | 511726 | 512005 | 1.5  | 1.08E-01 | transcription_start_site | - | 507547 | 507547 | -4318 | 20749 | AN5020 |
| 1709 | CONTIG84 | 511726 | 512005 | 1.5  | 1.08E-01 | transcription_start_site | + | 510861 | 510861 | 1004  | 20755 | AN5021 |
| 1709 | CONTIG84 | 511726 | 512005 | 1.5  | 1.08E-01 | transcription_start_site | - | 512306 | 512306 | 440   | 20757 | AN5022 |
| 1709 | CONTIG84 | 511726 | 512005 | 1.5  | 1.08E-01 | transcription_start_site | - | 512553 | 512553 | 687   | 20756 | AN5022 |
| 1709 | CONTIG84 | 511726 | 512005 | 1.5  | 1.08E-01 | transcription_start_site | + | 515823 | 515823 | -3957 | 20763 | AN5024 |
| 1709 | CONTIG84 | 511726 | 512005 | 1.5  | 1.08E-01 | transcription_start_site | + | 515978 | 515978 | -4112 | 20764 | AN5024 |
| 1709 | CONTIG84 | 511726 | 512005 | 1.5  | 1.08E-01 | transcription_start_site | + | 516159 | 516159 | -4293 | 20765 | AN5024 |
| 1709 | CONTIG84 | 511726 | 512005 | 1.5  | 1.08E-01 | transcription_start_site | + | 516570 | 516570 | -4704 | 20766 | AN5024 |
| 1709 | CONTIG84 | 511726 | 512005 | 1.5  | 1.08E-01 | transcription_start_site | + | 516728 | 516728 | -4862 | 20767 | AN5024 |
| 476  | CONTIG84 | 522228 | 522507 | 2.48 | 4.61E-03 | transcription_start_site | - | 522413 | 522413 | 45    | 20777 | AN5026 |

|      |          |        |        |      |          |                          |   |        |        |       |       |        |
|------|----------|--------|--------|------|----------|--------------------------|---|--------|--------|-------|-------|--------|
| 1149 | CONTIG84 | 526951 | 527300 | 1.8  | 4.36E-02 | transcription_start_site | - | 522413 | 522413 | -4712 | 20777 | AN5026 |
| 1149 | CONTIG84 | 526951 | 527300 | 1.8  | 4.36E-02 | transcription_start_site | - | 525540 | 525540 | -1585 | 20778 | AN5027 |
| 1149 | CONTIG84 | 526951 | 527300 | 1.8  | 4.36E-02 | transcription_start_site | - | 525362 | 525362 | -1763 | 20779 | AN5027 |
| 1149 | CONTIG84 | 526951 | 527300 | 1.8  | 4.36E-02 | transcription_start_site | + | 529075 | 529075 | -1949 | 20780 | AN5028 |
| 1149 | CONTIG84 | 526951 | 527300 | 1.8  | 4.36E-02 | transcription_start_site | + | 529567 | 529567 | -2441 | 20781 | AN5028 |
| 1149 | CONTIG84 | 526951 | 527300 | 1.8  | 4.36E-02 | transcription_start_site | + | 529718 | 529718 | -2592 | 20782 | AN5028 |
| 1149 | CONTIG84 | 526951 | 527300 | 1.8  | 4.36E-02 | transcription_start_site | + | 530011 | 530011 | -2885 | 20783 | AN5028 |
| 1149 | CONTIG84 | 526951 | 527300 | 1.8  | 4.36E-02 | transcription_start_site | + | 530270 | 530270 | -3144 | 20784 | AN5028 |
| 1149 | CONTIG84 | 526951 | 527300 | 1.8  | 4.36E-02 | transcription_start_site | + | 530459 | 530459 | -3333 | 20785 | AN5028 |
| 1149 | CONTIG84 | 526951 | 527300 | 1.8  | 4.36E-02 | transcription_start_site | + | 530597 | 530597 | -3471 | 20786 | AN5028 |
| 1149 | CONTIG84 | 526951 | 527300 | 1.8  | 4.36E-02 | transcription_start_site | + | 530978 | 530978 | -3852 | 20787 | AN5028 |
| 1149 | CONTIG84 | 526951 | 527300 | 1.8  | 4.36E-02 | transcription_start_site | + | 531370 | 531370 | -4244 | 20788 | AN5028 |
| 1149 | CONTIG84 | 526951 | 527300 | 1.8  | 4.36E-02 | transcription_start_site | + | 531906 | 531906 | -4780 | 20789 | AN5028 |
| 1844 | CONTIG84 | 544137 | 544476 | 1.44 | 1.25E-01 | transcription_start_site | - | 539480 | 539480 | -4826 | 20797 | AN5031 |
| 1844 | CONTIG84 | 544137 | 544476 | 1.44 | 1.25E-01 | transcription_start_site | - | 539348 | 539348 | -4958 | 20798 | AN5031 |
| 1844 | CONTIG84 | 544137 | 544476 | 1.44 | 1.25E-01 | transcription_start_site | + | 544673 | 544673 | -366  | 20805 | AN5033 |
| 1844 | CONTIG84 | 544137 | 544476 | 1.44 | 1.25E-01 | transcription_start_site | + | 544958 | 544958 | -651  | 20806 | AN5033 |
| 1844 | CONTIG84 | 544137 | 544476 | 1.44 | 1.25E-01 | transcription_start_site | + | 545053 | 545053 | -746  | 20807 | AN5033 |
| 1844 | CONTIG84 | 544137 | 544476 | 1.44 | 1.25E-01 | transcription_start_site | + | 545275 | 545275 | -968  | 20808 | AN5033 |
| 1844 | CONTIG84 | 544137 | 544476 | 1.44 | 1.25E-01 | transcription_start_site | + | 545396 | 545396 | -1089 | 20809 | AN5033 |
| 1844 | CONTIG84 | 544137 | 544476 | 1.44 | 1.25E-01 | transcription_start_site | + | 545802 | 545802 | -1495 | 20810 | AN5033 |
| 1844 | CONTIG84 | 544137 | 544476 | 1.44 | 1.25E-01 | transcription_start_site | + | 545894 | 545894 | -1587 | 20811 | AN5033 |
| 1844 | CONTIG84 | 544137 | 544476 | 1.44 | 1.25E-01 | transcription_start_site | + | 546398 | 546398 | -2091 | 20812 | AN5033 |
| 1844 | CONTIG84 | 544137 | 544476 | 1.44 | 1.25E-01 | transcription_start_site | + | 546641 | 546641 | -2334 | 20813 | AN5033 |
| 1844 | CONTIG84 | 544137 | 544476 | 1.44 | 1.25E-01 | transcription_start_site | + | 548987 | 548987 | -4680 | 20814 | AN5034 |
| 1844 | CONTIG84 | 544137 | 544476 | 1.44 | 1.25E-01 | transcription_start_site | + | 549072 | 549072 | -4765 | 20815 | AN5034 |
| 293  | CONTIG85 | 5946   | 6425   | 2.77 | 2.16E-04 | transcription_start_site | - | 2231   | 2231   | -3954 | 20877 | AN5053 |
| 293  | CONTIG85 | 5946   | 6425   | 2.77 | 2.16E-04 | transcription_start_site | - | 5022   | 5022   | -1163 | 20878 | AN5054 |
| 293  | CONTIG85 | 5946   | 6425   | 2.77 | 2.16E-04 | transcription_start_site | - | 4345   | 4345   | -1840 | 20879 | AN5054 |
| 293  | CONTIG85 | 5946   | 6425   | 2.77 | 2.16E-04 | transcription_start_site | - | 4236   | 4236   | -1949 | 20880 | AN5054 |
| 293  | CONTIG85 | 5946   | 6425   | 2.77 | 2.16E-04 | transcription_start_site | + | 7136   | 7136   | -950  | 20881 | AN5055 |
| 293  | CONTIG85 | 5946   | 6425   | 2.77 | 2.16E-04 | transcription_start_site | + | 7368   | 7368   | -1182 | 20882 | AN5055 |
| 293  | CONTIG85 | 5946   | 6425   | 2.77 | 2.16E-04 | transcription_start_site | + | 7740   | 7740   | -1554 | 20883 | AN5055 |
| 293  | CONTIG85 | 5946   | 6425   | 2.77 | 2.16E-04 | transcription_start_site | + | 8367   | 8367   | -2181 | 20884 | AN5055 |
| 293  | CONTIG85 | 5946   | 6425   | 2.77 | 2.16E-04 | transcription_start_site | + | 11265  | 11265  | -5079 | 20885 | AN5056 |
| 293  | CONTIG85 | 5946   | 6425   | 2.77 | 2.16E-04 | transcription_start_site | + | 11345  | 11345  | -5159 | 20886 | AN5056 |
| 1076 | CONTIG85 | 10956  | 11243  | 1.85 | 1.84E-02 | transcription_start_site | + | 11265  | 11265  | -165  | 20885 | AN5056 |
| 1076 | CONTIG85 | 10956  | 11243  | 1.85 | 1.84E-02 | transcription_start_site | + | 11345  | 11345  | -245  | 20886 | AN5056 |
| 1076 | CONTIG85 | 10956  | 11243  | 1.85 | 1.84E-02 | transcription_start_site | + | 11610  | 11610  | -510  | 20887 | AN5056 |
| 1863 | CONTIG85 | 29629  | 29918  | 1.43 | 8.01E-02 | transcription_start_site | + | 29075  | 29075  | 698   | 20905 | AN5061 |
| 1863 | CONTIG85 | 29629  | 29918  | 1.43 | 8.01E-02 | transcription_start_site | + | 28971  | 28971  | 802   | 20904 | AN5061 |
| 1863 | CONTIG85 | 29629  | 29918  | 1.43 | 8.01E-02 | transcription_start_site | + | 28677  | 28677  | 1096  | 20903 | AN5061 |
| 1863 | CONTIG85 | 29629  | 29918  | 1.43 | 8.01E-02 | transcription_start_site | + | 31013  | 31013  | -1239 | 20906 | AN5061 |
| 210  | CONTIG86 | 21089  | 21658  | 2.92 | 0.00E+00 | transcription_start_site | - | 17444  | 17444  | -3929 | 20922 | AN5067 |
| 210  | CONTIG86 | 21089  | 21658  | 2.92 | 0.00E+00 | transcription_start_site | - | 17300  | 17300  | -4073 | 20923 | AN5067 |
| 210  | CONTIG86 | 21089  | 21658  | 2.92 | 0.00E+00 | transcription_start_site | - | 16965  | 16965  | -4408 | 20924 | AN5067 |
| 210  | CONTIG86 | 21089  | 21658  | 2.92 | 0.00E+00 | transcription_start_site | - | 16363  | 16363  | -5010 | 20925 | AN5067 |
| 210  | CONTIG86 | 21089  | 21658  | 2.92 | 0.00E+00 | transcription_start_site | - | 16223  | 16223  | -5150 | 20926 | AN5067 |
| 210  | CONTIG86 | 21089  | 21658  | 2.92 | 0.00E+00 | transcription_start_site | + | 20945  | 20945  | 428   | 20935 | AN5068 |
| 210  | CONTIG86 | 21089  | 21658  | 2.92 | 0.00E+00 | transcription_start_site | + | 20097  | 20097  | 1276  | 20934 | AN5068 |
| 210  | CONTIG86 | 21089  | 21658  | 2.92 | 0.00E+00 | transcription_start_site | + | 22106  | 22106  | -732  | 20936 | AN5069 |
| 210  | CONTIG86 | 21089  | 21658  | 2.92 | 0.00E+00 | transcription_start_site | + | 22345  | 22345  | -971  | 20937 | AN5069 |
| 210  | CONTIG86 | 21089  | 21658  | 2.92 | 0.00E+00 | transcription_start_site | + | 22429  | 22429  | -1055 | 20938 | AN5069 |
| 210  | CONTIG86 | 21089  | 21658  | 2.92 | 0.00E+00 | transcription_start_site | + | 22530  | 22530  | -1156 | 20939 | AN5069 |
| 210  | CONTIG86 | 21089  | 21658  | 2.92 | 0.00E+00 | transcription_start_site | + | 22665  | 22665  | -1291 | 20940 | AN5069 |
| 210  | CONTIG86 | 21089  | 21658  | 2.92 | 0.00E+00 | transcription_start_site | + | 23212  | 23212  | -1838 | 20941 | AN5069 |
| 980  | CONTIG86 | 28141  | 28420  | 1.93 | 4.36E-02 | transcription_start_site | + | 28527  | 28527  | -246  | 20942 | AN5070 |

|               |       |       |      |          |                          |   |       |       |       |       |        |
|---------------|-------|-------|------|----------|--------------------------|---|-------|-------|-------|-------|--------|
| 980 CONTIG86  | 28141 | 28420 | 1.93 | 4.36E-02 | transcription_start_site | + | 28636 | 28636 | -355  | 20943 | AN5070 |
| 980 CONTIG86  | 28141 | 28420 | 1.93 | 4.36E-02 | transcription_start_site | + | 29675 | 29675 | -1394 | 20944 | AN5070 |
| 980 CONTIG86  | 28141 | 28420 | 1.93 | 4.36E-02 | transcription_start_site | + | 29969 | 29969 | -1688 | 20945 | AN5070 |
| 980 CONTIG86  | 28141 | 28420 | 1.93 | 4.36E-02 | transcription_start_site | + | 30719 | 30719 | -2438 | 20946 | AN5070 |
| 1610 CONTIG86 | 24454 | 24803 | 1.54 | 1.25E-01 | transcription_start_site | + | 28527 | 28527 | -3898 | 20942 | AN5070 |
| 1610 CONTIG86 | 24454 | 24803 | 1.54 | 1.25E-01 | transcription_start_site | + | 28636 | 28636 | -4007 | 20943 | AN5070 |
| 1610 CONTIG86 | 24454 | 24803 | 1.54 | 1.25E-01 | transcription_start_site | + | 29675 | 29675 | -5046 | 20944 | AN5070 |
| 980 CONTIG86  | 28141 | 28420 | 1.93 | 4.36E-02 | transcription_start_site | + | 31965 | 31965 | -3684 | 20947 | AN5071 |
| 980 CONTIG86  | 28141 | 28420 | 1.93 | 4.36E-02 | transcription_start_site | + | 32081 | 32081 | -3800 | 20948 | AN5071 |
| 980 CONTIG86  | 28141 | 28420 | 1.93 | 4.36E-02 | transcription_start_site | + | 32708 | 32708 | -4427 | 20949 | AN5071 |
| 980 CONTIG86  | 28141 | 28420 | 1.93 | 4.36E-02 | transcription_start_site | + | 33154 | 33154 | -4873 | 20950 | AN5071 |
| 1486 CONTIG86 | 38478 | 38755 | 1.6  | 1.08E-01 | transcription_start_site | - | 34748 | 34748 | -3868 | 20951 | AN5072 |
| 1486 CONTIG86 | 38478 | 38755 | 1.6  | 1.08E-01 | transcription_start_site | - | 34446 | 34446 | -4170 | 20952 | AN5072 |
| 1486 CONTIG86 | 38478 | 38755 | 1.6  | 1.08E-01 | transcription_start_site | - | 34278 | 34278 | -4338 | 20953 | AN5072 |
| 1486 CONTIG86 | 38478 | 38755 | 1.6  | 1.08E-01 | transcription_start_site | - | 34189 | 34189 | -4427 | 20954 | AN5072 |
| 1486 CONTIG86 | 38478 | 38755 | 1.6  | 1.08E-01 | transcription_start_site | + | 40696 | 40696 | -2079 | 20960 | AN5075 |
| 1486 CONTIG86 | 38478 | 38755 | 1.6  | 1.08E-01 | transcription_start_site | + | 41085 | 41085 | -2468 | 20961 | AN5075 |
| 1486 CONTIG86 | 38478 | 38755 | 1.6  | 1.08E-01 | transcription_start_site | + | 41293 | 41293 | -2676 | 20962 | AN5075 |
| 1486 CONTIG86 | 38478 | 38755 | 1.6  | 1.08E-01 | transcription_start_site | + | 41381 | 41381 | -2764 | 20963 | AN5075 |
| 1486 CONTIG86 | 38478 | 38755 | 1.6  | 1.08E-01 | transcription_start_site | + | 41760 | 41760 | -3143 | 20964 | AN5075 |
| 1486 CONTIG86 | 38478 | 38755 | 1.6  | 1.08E-01 | transcription_start_site | + | 42128 | 42128 | -3511 | 20965 | AN5075 |
| 1486 CONTIG86 | 38478 | 38755 | 1.6  | 1.08E-01 | transcription_start_site | + | 42444 | 42444 | -3827 | 20966 | AN5075 |
| 1486 CONTIG86 | 38478 | 38755 | 1.6  | 1.08E-01 | transcription_start_site | + | 42648 | 42648 | -4031 | 20967 | AN5075 |
| 1486 CONTIG86 | 38478 | 38755 | 1.6  | 1.08E-01 | transcription_start_site | + | 43163 | 43163 | -4546 | 20968 | AN5075 |
| 378 CONTIG86  | 47420 | 47684 | 2.64 | 4.61E-03 | transcription_start_site | - | 47055 | 47055 | -497  | 20969 | AN5076 |
| 378 CONTIG86  | 47420 | 47684 | 2.64 | 4.61E-03 | transcription_start_site | - | 46826 | 46826 | -726  | 20970 | AN5076 |
| 378 CONTIG86  | 47420 | 47684 | 2.64 | 4.61E-03 | transcription_start_site | - | 46671 | 46671 | -881  | 20971 | AN5076 |
| 378 CONTIG86  | 47420 | 47684 | 2.64 | 4.61E-03 | transcription_start_site | - | 46506 | 46506 | -1046 | 20972 | AN5076 |
| 378 CONTIG86  | 47420 | 47684 | 2.64 | 4.61E-03 | transcription_start_site | - | 46223 | 46223 | -1329 | 20973 | AN5076 |
| 378 CONTIG86  | 47420 | 47684 | 2.64 | 4.61E-03 | transcription_start_site | - | 46088 | 46088 | -1464 | 20974 | AN5076 |
| 931 CONTIG86  | 51835 | 52189 | 1.98 | 3.70E-02 | transcription_start_site | - | 47055 | 47055 | -4957 | 20969 | AN5076 |
| 1735 CONTIG86 | 45920 | 46179 | 1.49 | 1.44E-01 | transcription_start_site | - | 46088 | 46088 | 38    | 20974 | AN5076 |
| 1735 CONTIG86 | 45920 | 46179 | 1.49 | 1.44E-01 | transcription_start_site | - | 46223 | 46223 | 173   | 20973 | AN5076 |
| 1735 CONTIG86 | 45920 | 46179 | 1.49 | 1.44E-01 | transcription_start_site | - | 46506 | 46506 | 456   | 20972 | AN5076 |
| 1735 CONTIG86 | 45920 | 46179 | 1.49 | 1.44E-01 | transcription_start_site | - | 46671 | 46671 | 621   | 20971 | AN5076 |
| 1735 CONTIG86 | 45920 | 46179 | 1.49 | 1.44E-01 | transcription_start_site | - | 46826 | 46826 | 776   | 20970 | AN5076 |
| 1735 CONTIG86 | 45920 | 46179 | 1.49 | 1.44E-01 | transcription_start_site | - | 47055 | 47055 | 1005  | 20969 | AN5076 |
| 378 CONTIG86  | 47420 | 47684 | 2.64 | 4.61E-03 | transcription_start_site | + | 47748 | 47748 | -196  | 20975 | AN5077 |
| 378 CONTIG86  | 47420 | 47684 | 2.64 | 4.61E-03 | transcription_start_site | + | 50158 | 50158 | -2606 | 20976 | AN5077 |
| 378 CONTIG86  | 47420 | 47684 | 2.64 | 4.61E-03 | transcription_start_site | + | 50730 | 50730 | -3178 | 20977 | AN5077 |
| 378 CONTIG86  | 47420 | 47684 | 2.64 | 4.61E-03 | transcription_start_site | + | 50847 | 50847 | -3295 | 20978 | AN5077 |
| 378 CONTIG86  | 47420 | 47684 | 2.64 | 4.61E-03 | transcription_start_site | + | 51008 | 51008 | -3456 | 20979 | AN5077 |
| 378 CONTIG86  | 47420 | 47684 | 2.64 | 4.61E-03 | transcription_start_site | + | 51848 | 51848 | -4296 | 20980 | AN5077 |
| 378 CONTIG86  | 47420 | 47684 | 2.64 | 4.61E-03 | transcription_start_site | + | 52575 | 52575 | -5023 | 20981 | AN5077 |
| 931 CONTIG86  | 51835 | 52189 | 1.98 | 3.70E-02 | transcription_start_site | + | 51848 | 51848 | 164   | 20980 | AN5077 |
| 931 CONTIG86  | 51835 | 52189 | 1.98 | 3.70E-02 | transcription_start_site | + | 52575 | 52575 | -563  | 20981 | AN5077 |
| 931 CONTIG86  | 51835 | 52189 | 1.98 | 3.70E-02 | transcription_start_site | + | 51008 | 51008 | 1004  | 20979 | AN5077 |
| 931 CONTIG86  | 51835 | 52189 | 1.98 | 3.70E-02 | transcription_start_site | + | 50847 | 50847 | 1165  | 20978 | AN5077 |
| 931 CONTIG86  | 51835 | 52189 | 1.98 | 3.70E-02 | transcription_start_site | + | 53182 | 53182 | -1170 | 20982 | AN5077 |
| 1487 CONTIG86 | 44326 | 44694 | 1.6  | 1.08E-01 | transcription_start_site | + | 47748 | 47748 | -3238 | 20975 | AN5077 |
| 1735 CONTIG86 | 45920 | 46179 | 1.49 | 1.44E-01 | transcription_start_site | + | 47748 | 47748 | -1698 | 20975 | AN5077 |
| 1735 CONTIG86 | 45920 | 46179 | 1.49 | 1.44E-01 | transcription_start_site | + | 50158 | 50158 | -4108 | 20976 | AN5077 |
| 1735 CONTIG86 | 45920 | 46179 | 1.49 | 1.44E-01 | transcription_start_site | + | 50730 | 50730 | -4680 | 20977 | AN5077 |
| 1735 CONTIG86 | 45920 | 46179 | 1.49 | 1.44E-01 | transcription_start_site | + | 50847 | 50847 | -4797 | 20978 | AN5077 |
| 1735 CONTIG86 | 45920 | 46179 | 1.49 | 1.44E-01 | transcription_start_site | + | 51008 | 51008 | -4958 | 20979 | AN5077 |
| 931 CONTIG86  | 51835 | 52189 | 1.98 | 3.70E-02 | transcription_start_site | + | 55476 | 55476 | -3464 | 20983 | AN5078 |
| 931 CONTIG86  | 51835 | 52189 | 1.98 | 3.70E-02 | transcription_start_site | + | 55821 | 55821 | -3809 | 20984 | AN5078 |

|      |          |        |        |      |          |                          |   |        |        |       |       |        |
|------|----------|--------|--------|------|----------|--------------------------|---|--------|--------|-------|-------|--------|
| 931  | CONTIG86 | 51835  | 52189  | 1.98 | 3.70E-02 | transcription_start_site | + | 55925  | 55925  | -3913 | 20985 | AN5078 |
| 267  | CONTIG86 | 66230  | 66890  | 2.81 | 2.22E-03 | transcription_start_site | + | 67694  | 67694  | -1134 | 20991 | AN5082 |
| 267  | CONTIG86 | 66230  | 66890  | 2.81 | 2.22E-03 | transcription_start_site | + | 68163  | 68163  | -1603 | 20992 | AN5082 |
| 267  | CONTIG86 | 66230  | 66890  | 2.81 | 2.22E-03 | transcription_start_site | + | 68748  | 68748  | -2188 | 20993 | AN5082 |
| 313  | CONTIG86 | 74490  | 74851  | 2.75 | 3.03E-03 | transcription_start_site | - | 73173  | 73173  | -1497 | 20994 | AN5083 |
| 313  | CONTIG86 | 74490  | 74851  | 2.75 | 3.03E-03 | transcription_start_site | - | 72973  | 72973  | -1697 | 20995 | AN5083 |
| 313  | CONTIG86 | 74490  | 74851  | 2.75 | 3.03E-03 | transcription_start_site | - | 72824  | 72824  | -1846 | 20996 | AN5083 |
| 313  | CONTIG86 | 74490  | 74851  | 2.75 | 3.03E-03 | transcription_start_site | - | 71315  | 71315  | -3355 | 20997 | AN5083 |
| 313  | CONTIG86 | 74490  | 74851  | 2.75 | 3.03E-03 | transcription_start_site | - | 70380  | 70380  | -4290 | 20998 | AN5083 |
| 1282 | CONTIG86 | 82587  | 83006  | 1.71 | 8.01E-02 | transcription_start_site | + | 83100  | 83100  | -303  | 20999 | AN5086 |
| 1609 | CONTIG86 | 79067  | 79558  | 1.54 | 1.07E-01 | transcription_start_site | + | 83100  | 83100  | -3787 | 20999 | AN5086 |
| 161  | CONTIG86 | 89252  | 89766  | 3.03 | 1.01E-03 | transcription_start_site | - | 85868  | 85868  | -3641 | 21000 | AN5087 |
| 161  | CONTIG86 | 89252  | 89766  | 3.03 | 1.01E-03 | transcription_start_site | - | 85767  | 85767  | -3742 | 21001 | AN5087 |
| 161  | CONTIG86 | 89252  | 89766  | 3.03 | 1.01E-03 | transcription_start_site | - | 85358  | 85358  | -4151 | 21002 | AN5087 |
| 161  | CONTIG86 | 89252  | 89766  | 3.03 | 1.01E-03 | transcription_start_site | + | 90401  | 90401  | -892  | 21003 | AN5088 |
| 161  | CONTIG86 | 89252  | 89766  | 3.03 | 1.01E-03 | transcription_start_site | + | 93082  | 93082  | -3573 | 21004 | AN5088 |
| 161  | CONTIG86 | 89252  | 89766  | 3.03 | 1.01E-03 | transcription_start_site | + | 93314  | 93314  | -3805 | 21005 | AN5088 |
| 161  | CONTIG86 | 89252  | 89766  | 3.03 | 1.01E-03 | transcription_start_site | + | 93599  | 93599  | -4090 | 21006 | AN5088 |
| 161  | CONTIG86 | 89252  | 89766  | 3.03 | 1.01E-03 | transcription_start_site | + | 93842  | 93842  | -4333 | 21007 | AN5088 |
| 756  | CONTIG86 | 96396  | 96808  | 2.15 | 1.06E-02 | transcription_start_site | + | 96899  | 96899  | -297  | 21008 | AN5089 |
| 1283 | CONTIG86 | 103745 | 104019 | 1.71 | 8.01E-02 | transcription_start_site | - | 99164  | 99164  | -4718 | 21009 | AN5090 |
| 756  | CONTIG86 | 96396  | 96808  | 2.15 | 1.06E-02 | transcription_start_site | + | 100480 | 100480 | -3878 | 21010 | AN5091 |
| 756  | CONTIG86 | 96396  | 96808  | 2.15 | 1.06E-02 | transcription_start_site | + | 100805 | 100805 | -4203 | 21011 | AN5091 |
| 756  | CONTIG86 | 96396  | 96808  | 2.15 | 1.06E-02 | transcription_start_site | + | 101128 | 101128 | -4526 | 21012 | AN5091 |
| 756  | CONTIG86 | 96396  | 96808  | 2.15 | 1.06E-02 | transcription_start_site | + | 101309 | 101309 | -4707 | 21013 | AN5091 |
| 756  | CONTIG86 | 96396  | 96808  | 2.15 | 1.06E-02 | transcription_start_site | + | 101395 | 101395 | -4793 | 21014 | AN5091 |
| 1283 | CONTIG86 | 103745 | 104019 | 1.71 | 8.01E-02 | transcription_start_site | + | 105324 | 105324 | -1442 | 21016 | AN5092 |
| 1283 | CONTIG86 | 103745 | 104019 | 1.71 | 8.01E-02 | transcription_start_site | + | 105726 | 105726 | -1844 | 21017 | AN5092 |
| 1283 | CONTIG86 | 103745 | 104019 | 1.71 | 8.01E-02 | transcription_start_site | + | 107242 | 107242 | -3360 | 21018 | AN5092 |
| 2033 | CONTIG88 | 10501  | 10935  | 1.36 | 3.33E-02 | transcription_start_site | + | 11647  | 11647  | -929  | 21034 | AN5099 |
| 2033 | CONTIG88 | 10501  | 10935  | 1.36 | 3.33E-02 | transcription_start_site | + | 13986  | 13986  | -3268 | 21035 | AN5100 |
| 2033 | CONTIG88 | 10501  | 10935  | 1.36 | 3.33E-02 | transcription_start_site | + | 14138  | 14138  | -3420 | 21036 | AN5100 |
| 2033 | CONTIG88 | 10501  | 10935  | 1.36 | 3.33E-02 | transcription_start_site | + | 14229  | 14229  | -3511 | 21037 | AN5100 |
| 2033 | CONTIG88 | 10501  | 10935  | 1.36 | 3.33E-02 | transcription_start_site | + | 14385  | 14385  | -3667 | 21038 | AN5100 |
| 2033 | CONTIG88 | 10501  | 10935  | 1.36 | 3.33E-02 | transcription_start_site | + | 15149  | 15149  | -4431 | 21039 | AN5100 |
| 2033 | CONTIG88 | 10501  | 10935  | 1.36 | 3.33E-02 | transcription_start_site | + | 15404  | 15404  | -4686 | 21040 | AN5100 |
| 646  | CONTIG88 | 23476  | 23830  | 2.24 | 9.51E-04 | transcription_start_site | - | 20864  | 20864  | -2789 | 21043 | AN5102 |
| 646  | CONTIG88 | 23476  | 23830  | 2.24 | 9.51E-04 | transcription_start_site | - | 20634  | 20634  | -3019 | 21044 | AN5102 |
| 646  | CONTIG88 | 23476  | 23830  | 2.24 | 9.51E-04 | transcription_start_site | - | 20489  | 20489  | -3164 | 21045 | AN5102 |
| 646  | CONTIG88 | 23476  | 23830  | 2.24 | 9.51E-04 | transcription_start_site | - | 20284  | 20284  | -3369 | 21046 | AN5102 |
| 646  | CONTIG88 | 23476  | 23830  | 2.24 | 9.51E-04 | transcription_start_site | - | 20078  | 20078  | -3575 | 21047 | AN5102 |
| 646  | CONTIG88 | 23476  | 23830  | 2.24 | 9.51E-04 | transcription_start_site | - | 18597  | 18597  | -5056 | 21048 | AN5102 |
| 646  | CONTIG88 | 23476  | 23830  | 2.24 | 9.51E-04 | transcription_start_site | + | 24966  | 24966  | -1313 | 21054 | AN5104 |
| 646  | CONTIG88 | 23476  | 23830  | 2.24 | 9.51E-04 | transcription_start_site | + | 25079  | 25079  | -1426 | 21055 | AN5104 |
| 646  | CONTIG88 | 23476  | 23830  | 2.24 | 9.51E-04 | transcription_start_site | + | 25220  | 25220  | -1567 | 21056 | AN5104 |
| 646  | CONTIG88 | 23476  | 23830  | 2.24 | 9.51E-04 | transcription_start_site | + | 25575  | 25575  | -1922 | 21057 | AN5104 |
| 646  | CONTIG88 | 23476  | 23830  | 2.24 | 9.51E-04 | transcription_start_site | + | 25839  | 25839  | -2186 | 21058 | AN5104 |
| 646  | CONTIG88 | 23476  | 23830  | 2.24 | 9.51E-04 | transcription_start_site | + | 26599  | 26599  | -2946 | 21059 | AN5104 |
| 646  | CONTIG88 | 23476  | 23830  | 2.24 | 9.51E-04 | transcription_start_site | + | 27951  | 27951  | -4298 | 21060 | AN5105 |
| 646  | CONTIG88 | 23476  | 23830  | 2.24 | 9.51E-04 | transcription_start_site | + | 28162  | 28162  | -4509 | 21061 | AN5105 |
| 646  | CONTIG88 | 23476  | 23830  | 2.24 | 9.51E-04 | transcription_start_site | + | 28349  | 28349  | -4696 | 21062 | AN5105 |
| 647  | CONTIG88 | 65046  | 65310  | 2.24 | 9.51E-04 | transcription_start_site | + | 65264  | 65264  | -86   | 21104 | AN5117 |
| 647  | CONTIG88 | 65046  | 65310  | 2.24 | 9.51E-04 | transcription_start_site | + | 65082  | 65082  | 96    | 21103 | AN5117 |
| 647  | CONTIG88 | 65046  | 65310  | 2.24 | 9.51E-04 | transcription_start_site | + | 64761  | 64761  | 417   | 21102 | AN5117 |
| 647  | CONTIG88 | 65046  | 65310  | 2.24 | 9.51E-04 | transcription_start_site | + | 64485  | 64485  | 693   | 21101 | AN5117 |
| 647  | CONTIG88 | 65046  | 65310  | 2.24 | 9.51E-04 | transcription_start_site | + | 66073  | 66073  | -895  | 21105 | AN5118 |
| 647  | CONTIG88 | 65046  | 65310  | 2.24 | 9.51E-04 | transcription_start_site | + | 66707  | 66707  | -1529 | 21106 | AN5118 |



|      |          |        |        |      |          |                          |   |        |        |       |       |        |
|------|----------|--------|--------|------|----------|--------------------------|---|--------|--------|-------|-------|--------|
| 647  | CONTIG88 | 65046  | 65310  | 2.24 | 9.51E-04 | transcription_start_site | + | 66959  | 66959  | -1781 | 21107 | AN5118 |
| 2781 | CONTIG88 | 66377  | 67478  | 1.08 | 1.44E-01 | transcription_start_site | + | 66959  | 66959  | -31   | 21107 | AN5118 |
| 2781 | CONTIG88 | 66377  | 67478  | 1.08 | 1.44E-01 | transcription_start_site | + | 66707  | 66707  | 220   | 21106 | AN5118 |
| 2781 | CONTIG88 | 66377  | 67478  | 1.08 | 1.44E-01 | transcription_start_site | + | 66073  | 66073  | 854   | 21105 | AN5118 |
| 2781 | CONTIG88 | 66377  | 67478  | 1.08 | 1.44E-01 | transcription_start_site | - | 68228  | 68228  | 1300  | 21111 | AN5119 |
| 647  | CONTIG88 | 65046  | 65310  | 2.24 | 9.51E-04 | transcription_start_site | + | 69593  | 69593  | -4415 | 21112 | AN5120 |
| 647  | CONTIG88 | 65046  | 65310  | 2.24 | 9.51E-04 | transcription_start_site | + | 70118  | 70118  | -4940 | 21113 | AN5120 |
| 2781 | CONTIG88 | 66377  | 67478  | 1.08 | 1.44E-01 | transcription_start_site | + | 69593  | 69593  | -2665 | 21112 | AN5120 |
| 2781 | CONTIG88 | 66377  | 67478  | 1.08 | 1.44E-01 | transcription_start_site | + | 70118  | 70118  | -3190 | 21113 | AN5120 |
| 2706 | CONTIG88 | 78010  | 78284  | 1.12 | 1.25E-01 | transcription_start_site | - | 73338  | 73338  | -4809 | 21114 | AN5121 |
| 2706 | CONTIG88 | 78010  | 78284  | 1.12 | 1.25E-01 | transcription_start_site | - | 73105  | 73105  | -5042 | 21115 | AN5121 |
| 2706 | CONTIG88 | 78010  | 78284  | 1.12 | 1.25E-01 | transcription_start_site | - | 76421  | 76421  | -1726 | 21121 | AN5123 |
| 2706 | CONTIG88 | 78010  | 78284  | 1.12 | 1.25E-01 | transcription_start_site | - | 76325  | 76325  | -1822 | 21122 | AN5123 |
| 2706 | CONTIG88 | 78010  | 78284  | 1.12 | 1.25E-01 | transcription_start_site | - | 76252  | 76252  | -1895 | 21123 | AN5123 |
| 2706 | CONTIG88 | 78010  | 78284  | 1.12 | 1.25E-01 | transcription_start_site | - | 75663  | 75663  | -2484 | 21124 | AN5123 |
| 2706 | CONTIG88 | 78010  | 78284  | 1.12 | 1.25E-01 | transcription_start_site | - | 78401  | 78401  | 254   | 21127 | AN5124 |
| 2706 | CONTIG88 | 78010  | 78284  | 1.12 | 1.25E-01 | transcription_start_site | - | 77646  | 77646  | -501  | 21128 | AN5124 |
| 2706 | CONTIG88 | 78010  | 78284  | 1.12 | 1.25E-01 | transcription_start_site | - | 78890  | 78890  | 743   | 21126 | AN5124 |
| 2706 | CONTIG88 | 78010  | 78284  | 1.12 | 1.25E-01 | transcription_start_site | - | 77403  | 77403  | -744  | 21129 | AN5124 |
| 2706 | CONTIG88 | 78010  | 78284  | 1.12 | 1.25E-01 | transcription_start_site | - | 79142  | 79142  | 995   | 21125 | AN5124 |
| 2706 | CONTIG88 | 78010  | 78284  | 1.12 | 1.25E-01 | transcription_start_site | - | 76988  | 76988  | -1159 | 21130 | AN5124 |
| 2706 | CONTIG88 | 78010  | 78284  | 1.12 | 1.25E-01 | transcription_start_site | + | 80016  | 80016  | -1869 | 21131 | AN5125 |
| 2706 | CONTIG88 | 78010  | 78284  | 1.12 | 1.25E-01 | transcription_start_site | + | 80199  | 80199  | -2052 | 21132 | AN5125 |
| 2706 | CONTIG88 | 78010  | 78284  | 1.12 | 1.25E-01 | transcription_start_site | + | 80278  | 80278  | -2131 | 21133 | AN5125 |
| 2706 | CONTIG88 | 78010  | 78284  | 1.12 | 1.25E-01 | transcription_start_site | + | 80353  | 80353  | -2206 | 21134 | AN5125 |
| 2706 | CONTIG88 | 78010  | 78284  | 1.12 | 1.25E-01 | transcription_start_site | + | 81044  | 81044  | -2897 | 21135 | AN5126 |
| 2706 | CONTIG88 | 78010  | 78284  | 1.12 | 1.25E-01 | transcription_start_site | + | 82980  | 82980  | -4833 | 21136 | AN5126 |
| 2706 | CONTIG88 | 78010  | 78284  | 1.12 | 1.25E-01 | transcription_start_site | + | 83214  | 83214  | -5067 | 21137 | AN5126 |
| 1914 | CONTIG88 | 87539  | 87968  | 1.4  | 4.36E-02 | transcription_start_site | - | 85842  | 85842  | -1911 | 21138 | AN5127 |
| 1914 | CONTIG88 | 87539  | 87968  | 1.4  | 4.36E-02 | transcription_start_site | - | 85778  | 85778  | -1975 | 21139 | AN5127 |
| 1914 | CONTIG88 | 87539  | 87968  | 1.4  | 4.36E-02 | transcription_start_site | - | 85502  | 85502  | -2251 | 21140 | AN5127 |
| 1914 | CONTIG88 | 87539  | 87968  | 1.4  | 4.36E-02 | transcription_start_site | - | 85330  | 85330  | -2423 | 21141 | AN5127 |
| 2508 | CONTIG88 | 88884  | 89158  | 1.2  | 9.24E-02 | transcription_start_site | - | 85842  | 85842  | -3179 | 21138 | AN5127 |
| 2508 | CONTIG88 | 88884  | 89158  | 1.2  | 9.24E-02 | transcription_start_site | - | 85778  | 85778  | -3243 | 21139 | AN5127 |
| 2508 | CONTIG88 | 88884  | 89158  | 1.2  | 9.24E-02 | transcription_start_site | - | 85502  | 85502  | -3519 | 21140 | AN5127 |
| 2508 | CONTIG88 | 88884  | 89158  | 1.2  | 9.24E-02 | transcription_start_site | - | 85330  | 85330  | -3691 | 21141 | AN5127 |
| 1914 | CONTIG88 | 87539  | 87968  | 1.4  | 4.36E-02 | transcription_start_site | - | 86796  | 86796  | -957  | 21142 | AN5128 |
| 1914 | CONTIG88 | 87539  | 87968  | 1.4  | 4.36E-02 | transcription_start_site | - | 86576  | 86576  | -1177 | 21143 | AN5128 |
| 1914 | CONTIG88 | 87539  | 87968  | 1.4  | 4.36E-02 | transcription_start_site | - | 86509  | 86509  | -1244 | 21144 | AN5128 |
| 2508 | CONTIG88 | 88884  | 89158  | 1.2  | 9.24E-02 | transcription_start_site | - | 86796  | 86796  | -2225 | 21142 | AN5128 |
| 2508 | CONTIG88 | 88884  | 89158  | 1.2  | 9.24E-02 | transcription_start_site | - | 86576  | 86576  | -2445 | 21143 | AN5128 |
| 2508 | CONTIG88 | 88884  | 89158  | 1.2  | 9.24E-02 | transcription_start_site | - | 86509  | 86509  | -2512 | 21144 | AN5128 |
| 1914 | CONTIG88 | 87539  | 87968  | 1.4  | 4.36E-02 | transcription_start_site | + | 88164  | 88164  | -410  | 21145 | AN5129 |
| 2508 | CONTIG88 | 88884  | 89158  | 1.2  | 9.24E-02 | transcription_start_site | + | 88164  | 88164  | 857   | 21145 | AN5129 |
| 2508 | CONTIG88 | 88884  | 89158  | 1.2  | 9.24E-02 | transcription_start_site | + | 93965  | 93965  | -4944 | 21148 | AN5131 |
| 376  | CONTIG88 | 103351 | 103700 | 2.64 | 0.00E+00 | transcription_start_site | - | 98456  | 98456  | -5069 | 21157 | AN5133 |
| 376  | CONTIG88 | 103351 | 103700 | 2.64 | 0.00E+00 | transcription_start_site | - | 98373  | 98373  | -5152 | 21158 | AN5133 |
| 898  | CONTIG88 | 101176 | 101465 | 2    | 3.03E-03 | transcription_start_site | - | 98456  | 98456  | -2864 | 21157 | AN5133 |
| 898  | CONTIG88 | 101176 | 101465 | 2    | 3.03E-03 | transcription_start_site | - | 98373  | 98373  | -2947 | 21158 | AN5133 |
| 1915 | CONTIG88 | 99830  | 100119 | 1.4  | 4.36E-02 | transcription_start_site | - | 98456  | 98456  | -1518 | 21157 | AN5133 |
| 1915 | CONTIG88 | 99830  | 100119 | 1.4  | 4.36E-02 | transcription_start_site | - | 98373  | 98373  | -1601 | 21158 | AN5133 |
| 376  | CONTIG88 | 103351 | 103700 | 2.64 | 0.00E+00 | transcription_start_site | + | 104045 | 104045 | -519  | 21159 | AN5134 |
| 376  | CONTIG88 | 103351 | 103700 | 2.64 | 0.00E+00 | transcription_start_site | + | 104285 | 104285 | -759  | 21160 | AN5134 |
| 376  | CONTIG88 | 103351 | 103700 | 2.64 | 0.00E+00 | transcription_start_site | + | 104384 | 104384 | -858  | 21161 | AN5134 |
| 376  | CONTIG88 | 103351 | 103700 | 2.64 | 0.00E+00 | transcription_start_site | + | 107783 | 107783 | -4257 | 21162 | AN5134 |
| 376  | CONTIG88 | 103351 | 103700 | 2.64 | 0.00E+00 | transcription_start_site | + | 107870 | 107870 | -4344 | 21163 | AN5134 |
| 898  | CONTIG88 | 101176 | 101465 | 2    | 3.03E-03 | transcription_start_site | + | 104045 | 104045 | -2724 | 21159 | AN5134 |

|      |          |        |        |      |          |                          |   |        |        |       |       |        |
|------|----------|--------|--------|------|----------|--------------------------|---|--------|--------|-------|-------|--------|
| 898  | CONTIG88 | 101176 | 101465 | 2    | 3.03E-03 | transcription_start_site | + | 104285 | 104285 | -2964 | 21160 | AN5134 |
| 898  | CONTIG88 | 101176 | 101465 | 2    | 3.03E-03 | transcription_start_site | + | 104384 | 104384 | -3063 | 21161 | AN5134 |
| 1915 | CONTIG88 | 99830  | 100119 | 1.4  | 4.36E-02 | transcription_start_site | + | 104045 | 104045 | -4070 | 21159 | AN5134 |
| 1915 | CONTIG88 | 99830  | 100119 | 1.4  | 4.36E-02 | transcription_start_site | + | 104285 | 104285 | -4310 | 21160 | AN5134 |
| 1915 | CONTIG88 | 99830  | 100119 | 1.4  | 4.36E-02 | transcription_start_site | + | 104384 | 104384 | -4409 | 21161 | AN5134 |
| 2370 | CONTIG88 | 113566 | 113991 | 1.24 | 8.01E-02 | transcription_start_site | - | 112272 | 112272 | -1506 | 21164 | AN5135 |
| 2370 | CONTIG88 | 113566 | 113991 | 1.24 | 8.01E-02 | transcription_start_site | - | 113464 | 113464 | -314  | 21165 | AN5136 |
| 2370 | CONTIG88 | 113566 | 113991 | 1.24 | 8.01E-02 | transcription_start_site | + | 118738 | 118738 | -4959 | 21166 | AN5138 |
| 2843 | CONTIG88 | 126231 | 126735 | 1.04 | 1.50E-01 | transcription_start_site | - | 126761 | 126761 | 278   | 21170 | AN5140 |
| 2843 | CONTIG88 | 126231 | 126735 | 1.04 | 1.50E-01 | transcription_start_site | - | 126884 | 126884 | 401   | 21169 | AN5140 |
| 1035 | CONTIG88 | 139581 | 139935 | 1.88 | 2.32E-03 | transcription_start_site | - | 139114 | 139114 | -644  | 21175 | AN5144 |
| 1035 | CONTIG88 | 139581 | 139935 | 1.88 | 2.32E-03 | transcription_start_site | - | 138555 | 138555 | -1203 | 21176 | AN5144 |
| 2608 | CONTIG88 | 138161 | 138505 | 1.16 | 1.08E-01 | transcription_start_site | - | 138555 | 138555 | 222   | 21176 | AN5144 |
| 2608 | CONTIG88 | 138161 | 138505 | 1.16 | 1.08E-01 | transcription_start_site | - | 139114 | 139114 | 781   | 21175 | AN5144 |
| 2850 | CONTIG88 | 141236 | 141520 | 1.04 | 1.66E-01 | transcription_start_site | - | 139114 | 139114 | -2264 | 21175 | AN5144 |
| 2850 | CONTIG88 | 141236 | 141520 | 1.04 | 1.66E-01 | transcription_start_site | - | 138555 | 138555 | -2823 | 21176 | AN5144 |
| 1035 | CONTIG88 | 139581 | 139935 | 1.88 | 2.32E-03 | transcription_start_site | - | 140833 | 140833 | 1075  | 21178 | AN5145 |
| 2850 | CONTIG88 | 141236 | 141520 | 1.04 | 1.66E-01 | transcription_start_site | - | 140945 | 140945 | -433  | 21177 | AN5145 |
| 2850 | CONTIG88 | 141236 | 141520 | 1.04 | 1.66E-01 | transcription_start_site | - | 140833 | 140833 | -545  | 21178 | AN5145 |
| 1035 | CONTIG88 | 139581 | 139935 | 1.88 | 2.32E-03 | transcription_start_site | + | 141707 | 141707 | -1949 | 21179 | AN5146 |
| 1035 | CONTIG88 | 139581 | 139935 | 1.88 | 2.32E-03 | transcription_start_site | + | 141788 | 141788 | -2030 | 21180 | AN5146 |
| 1035 | CONTIG88 | 139581 | 139935 | 1.88 | 2.32E-03 | transcription_start_site | + | 141904 | 141904 | -2146 | 21181 | AN5146 |
| 1035 | CONTIG88 | 139581 | 139935 | 1.88 | 2.32E-03 | transcription_start_site | + | 143145 | 143145 | -3387 | 21182 | AN5146 |
| 1035 | CONTIG88 | 139581 | 139935 | 1.88 | 2.32E-03 | transcription_start_site | + | 143270 | 143270 | -3512 | 21183 | AN5146 |
| 2608 | CONTIG88 | 138161 | 138505 | 1.16 | 1.08E-01 | transcription_start_site | + | 141707 | 141707 | -3374 | 21179 | AN5146 |
| 2608 | CONTIG88 | 138161 | 138505 | 1.16 | 1.08E-01 | transcription_start_site | + | 141788 | 141788 | -3455 | 21180 | AN5146 |
| 2608 | CONTIG88 | 138161 | 138505 | 1.16 | 1.08E-01 | transcription_start_site | + | 141904 | 141904 | -3571 | 21181 | AN5146 |
| 2608 | CONTIG88 | 138161 | 138505 | 1.16 | 1.08E-01 | transcription_start_site | + | 143145 | 143145 | -4812 | 21182 | AN5146 |
| 2608 | CONTIG88 | 138161 | 138505 | 1.16 | 1.08E-01 | transcription_start_site | + | 143270 | 143270 | -4937 | 21183 | AN5146 |
| 2850 | CONTIG88 | 141236 | 141520 | 1.04 | 1.66E-01 | transcription_start_site | + | 141707 | 141707 | -329  | 21179 | AN5146 |
| 2850 | CONTIG88 | 141236 | 141520 | 1.04 | 1.66E-01 | transcription_start_site | + | 141788 | 141788 | -410  | 21180 | AN5146 |
| 2850 | CONTIG88 | 141236 | 141520 | 1.04 | 1.66E-01 | transcription_start_site | + | 141904 | 141904 | -526  | 21181 | AN5146 |
| 2850 | CONTIG88 | 141236 | 141520 | 1.04 | 1.66E-01 | transcription_start_site | + | 143145 | 143145 | -1767 | 21182 | AN5146 |
| 2850 | CONTIG88 | 141236 | 141520 | 1.04 | 1.66E-01 | transcription_start_site | + | 143270 | 143270 | -1892 | 21183 | AN5146 |
| 1312 | CONTIG88 | 151818 | 152092 | 1.68 | 1.30E-02 | transcription_start_site | - | 149034 | 149034 | -2921 | 21184 | AN5148 |
| 1312 | CONTIG88 | 151818 | 152092 | 1.68 | 1.30E-02 | transcription_start_site | - | 148909 | 148909 | -3046 | 21185 | AN5148 |
| 1312 | CONTIG88 | 151818 | 152092 | 1.68 | 1.30E-02 | transcription_start_site | - | 148638 | 148638 | -3317 | 21186 | AN5148 |
| 1312 | CONTIG88 | 151818 | 152092 | 1.68 | 1.30E-02 | transcription_start_site | - | 148455 | 148455 | -3500 | 21187 | AN5148 |
| 1312 | CONTIG88 | 151818 | 152092 | 1.68 | 1.30E-02 | transcription_start_site | + | 154813 | 154813 | -2858 | 21189 | AN5151 |
| 1312 | CONTIG88 | 151818 | 152092 | 1.68 | 1.30E-02 | transcription_start_site | + | 155038 | 155038 | -3083 | 21190 | AN5151 |
| 1136 | CONTIG88 | 159019 | 159293 | 1.8  | 7.85E-03 | transcription_start_site | + | 160062 | 160062 | -906  | 21191 | AN5152 |
| 1136 | CONTIG88 | 159019 | 159293 | 1.8  | 7.85E-03 | transcription_start_site | + | 160165 | 160165 | -1009 | 21192 | AN5152 |
| 1136 | CONTIG88 | 159019 | 159293 | 1.8  | 7.85E-03 | transcription_start_site | + | 160273 | 160273 | -1117 | 21193 | AN5152 |
| 1136 | CONTIG88 | 159019 | 159293 | 1.8  | 7.85E-03 | transcription_start_site | + | 160417 | 160417 | -1261 | 21194 | AN5152 |
| 1136 | CONTIG88 | 159019 | 159293 | 1.8  | 7.85E-03 | transcription_start_site | + | 160558 | 160558 | -1402 | 21195 | AN5152 |
| 1136 | CONTIG88 | 159019 | 159293 | 1.8  | 7.85E-03 | transcription_start_site | + | 160702 | 160702 | -1546 | 21196 | AN5152 |
| 1136 | CONTIG88 | 159019 | 159293 | 1.8  | 7.85E-03 | transcription_start_site | + | 161089 | 161089 | -1933 | 21197 | AN5152 |
| 2131 | CONTIG88 | 163589 | 163853 | 1.32 | 5.88E-02 | transcription_start_site | - | 162930 | 162930 | -791  | 21198 | AN5153 |
| 2131 | CONTIG88 | 163589 | 163853 | 1.32 | 5.88E-02 | transcription_start_site | - | 162833 | 162833 | -888  | 21199 | AN5153 |
| 1136 | CONTIG88 | 159019 | 159293 | 1.8  | 7.85E-03 | transcription_start_site | + | 163524 | 163524 | -4368 | 21200 | AN5154 |
| 2131 | CONTIG88 | 163589 | 163853 | 1.32 | 5.88E-02 | transcription_start_site | + | 163524 | 163524 | 197   | 21200 | AN5154 |
| 2131 | CONTIG88 | 163589 | 163853 | 1.32 | 5.88E-02 | transcription_start_site | + | 167543 | 167543 | -3822 | 21201 | AN5154 |
| 2131 | CONTIG88 | 163589 | 163853 | 1.32 | 5.88E-02 | transcription_start_site | + | 167781 | 167781 | -4060 | 21202 | AN5154 |
| 449  | CONTIG88 | 172070 | 172559 | 2.52 | 0.00E+00 | transcription_start_site | - | 170208 | 170208 | -2106 | 21203 | AN5155 |
| 449  | CONTIG88 | 172070 | 172559 | 2.52 | 0.00E+00 | transcription_start_site | - | 170059 | 170059 | -2255 | 21204 | AN5155 |
| 449  | CONTIG88 | 172070 | 172559 | 2.52 | 0.00E+00 | transcription_start_site | - | 169952 | 169952 | -2362 | 21205 | AN5155 |
| 2910 | CONTIG88 | 168979 | 169488 | 1    | 1.93E-01 | transcription_start_site | - | 169952 | 169952 | 718   | 21205 | AN5155 |

|      |          |        |        |      |          |                          |   |        |        |       |       |        |
|------|----------|--------|--------|------|----------|--------------------------|---|--------|--------|-------|-------|--------|
| 2910 | CONTIG88 | 168979 | 169488 | 1    | 1.93E-01 | transcription_start_site | - | 170059 | 170059 | 825   | 21204 | AN5155 |
| 2910 | CONTIG88 | 168979 | 169488 | 1    | 1.93E-01 | transcription_start_site | - | 170208 | 170208 | 974   | 21203 | AN5155 |
| 449  | CONTIG88 | 172070 | 172559 | 2.52 | 0.00E+00 | transcription_start_site | - | 172010 | 172010 | -304  | 21206 | AN5156 |
| 449  | CONTIG88 | 172070 | 172559 | 2.52 | 0.00E+00 | transcription_start_site | + | 173224 | 173224 | -909  | 21207 | AN5157 |
| 449  | CONTIG88 | 172070 | 172559 | 2.52 | 0.00E+00 | transcription_start_site | + | 173573 | 173573 | -1258 | 21208 | AN5157 |
| 449  | CONTIG88 | 172070 | 172559 | 2.52 | 0.00E+00 | transcription_start_site | + | 175319 | 175319 | -3004 | 21209 | AN5157 |
| 2910 | CONTIG88 | 168979 | 169488 | 1    | 1.93E-01 | transcription_start_site | + | 173224 | 173224 | -3990 | 21207 | AN5157 |
| 2910 | CONTIG88 | 168979 | 169488 | 1    | 1.93E-01 | transcription_start_site | + | 173573 | 173573 | -4339 | 21208 | AN5157 |
| 1505 | CONTIG89 | 18540  | 19569  | 1.58 | 2.64E-02 | transcription_start_site | - | 19646  | 19646  | 591   | 21229 | AN5163 |
| 598  | CONTIG89 | 32262  | 32686  | 2.31 | 2.22E-03 | transcription_start_site | + | 33967  | 33967  | -1493 | 21239 | AN5167 |
| 598  | CONTIG89 | 32262  | 32686  | 2.31 | 2.22E-03 | transcription_start_site | + | 34437  | 34437  | -1963 | 21240 | AN5167 |
| 598  | CONTIG89 | 32262  | 32686  | 2.31 | 2.22E-03 | transcription_start_site | + | 35752  | 35752  | -3278 | 21241 | AN5167 |
| 598  | CONTIG89 | 32262  | 32686  | 2.31 | 2.22E-03 | transcription_start_site | + | 36770  | 36770  | -4296 | 21242 | AN5167 |
| 1921 | CONTIG89 | 33677  | 34854  | 1.4  | 6.16E-02 | transcription_start_site | + | 34437  | 34437  | -171  | 21240 | AN5167 |
| 1921 | CONTIG89 | 33677  | 34854  | 1.4  | 6.16E-02 | transcription_start_site | + | 33967  | 33967  | 298   | 21239 | AN5167 |
| 1921 | CONTIG89 | 33677  | 34854  | 1.4  | 6.16E-02 | transcription_start_site | + | 35752  | 35752  | -1486 | 21241 | AN5167 |
| 1921 | CONTIG89 | 33677  | 34854  | 1.4  | 6.16E-02 | transcription_start_site | + | 36770  | 36770  | -2504 | 21242 | AN5167 |
| 1399 | CONTIG89 | 45760  | 46029  | 1.63 | 3.70E-02 | transcription_start_site | - | 43680  | 43680  | -2214 | 21243 | AN5168 |
| 1399 | CONTIG89 | 45760  | 46029  | 1.63 | 3.70E-02 | transcription_start_site | - | 43214  | 43214  | -2680 | 21244 | AN5168 |
| 1399 | CONTIG89 | 45760  | 46029  | 1.63 | 3.70E-02 | transcription_start_site | - | 43090  | 43090  | -2804 | 21245 | AN5168 |
| 1399 | CONTIG89 | 45760  | 46029  | 1.63 | 3.70E-02 | transcription_start_site | - | 42840  | 42840  | -3054 | 21246 | AN5168 |
| 1399 | CONTIG89 | 45760  | 46029  | 1.63 | 3.70E-02 | transcription_start_site | - | 42761  | 42761  | -3133 | 21247 | AN5168 |
| 2169 | CONTIG89 | 48395  | 48812  | 1.31 | 1.08E-01 | transcription_start_site | - | 43680  | 43680  | -4923 | 21243 | AN5168 |
| 1257 | CONTIG89 | 50630  | 51066  | 1.72 | 2.62E-02 | transcription_start_site | - | 47954  | 47954  | -2894 | 21249 | AN5169 |
| 1257 | CONTIG89 | 50630  | 51066  | 1.72 | 2.62E-02 | transcription_start_site | - | 47903  | 47903  | -2945 | 21250 | AN5169 |
| 1257 | CONTIG89 | 50630  | 51066  | 1.72 | 2.62E-02 | transcription_start_site | - | 47648  | 47648  | -3200 | 21251 | AN5169 |
| 2169 | CONTIG89 | 48395  | 48812  | 1.31 | 1.08E-01 | transcription_start_site | - | 47954  | 47954  | -649  | 21249 | AN5169 |
| 2169 | CONTIG89 | 48395  | 48812  | 1.31 | 1.08E-01 | transcription_start_site | - | 47903  | 47903  | -700  | 21250 | AN5169 |
| 2169 | CONTIG89 | 48395  | 48812  | 1.31 | 1.08E-01 | transcription_start_site | - | 47648  | 47648  | -955  | 21251 | AN5169 |
| 1257 | CONTIG89 | 50630  | 51066  | 1.72 | 2.62E-02 | transcription_start_site | + | 51651  | 51651  | -803  | 21252 | AN5170 |
| 1257 | CONTIG89 | 50630  | 51066  | 1.72 | 2.62E-02 | transcription_start_site | + | 51878  | 51878  | -1030 | 21253 | AN5170 |
| 1257 | CONTIG89 | 50630  | 51066  | 1.72 | 2.62E-02 | transcription_start_site | + | 52124  | 52124  | -1276 | 21254 | AN5170 |
| 2169 | CONTIG89 | 48395  | 48812  | 1.31 | 1.08E-01 | transcription_start_site | + | 51651  | 51651  | -3047 | 21252 | AN5170 |
| 2169 | CONTIG89 | 48395  | 48812  | 1.31 | 1.08E-01 | transcription_start_site | + | 51878  | 51878  | -3274 | 21253 | AN5170 |
| 2169 | CONTIG89 | 48395  | 48812  | 1.31 | 1.08E-01 | transcription_start_site | + | 52124  | 52124  | -3520 | 21254 | AN5170 |
| 1257 | CONTIG89 | 50630  | 51066  | 1.72 | 2.62E-02 | transcription_start_site | + | 55454  | 55454  | -4606 | 21255 | AN5171 |
| 1257 | CONTIG89 | 50630  | 51066  | 1.72 | 2.62E-02 | transcription_start_site | + | 55637  | 55637  | -4789 | 21256 | AN5171 |
| 2170 | CONTIG89 | 77719  | 77993  | 1.31 | 1.08E-01 | transcription_start_site | + | 77326  | 77326  | 530   | 21276 | AN5177 |
| 2170 | CONTIG89 | 77719  | 77993  | 1.31 | 1.08E-01 | transcription_start_site | + | 76886  | 76886  | 970   | 21275 | AN5177 |
| 2170 | CONTIG89 | 77719  | 77993  | 1.31 | 1.08E-01 | transcription_start_site | + | 78704  | 78704  | -848  | 21277 | AN5178 |
| 2170 | CONTIG89 | 77719  | 77993  | 1.31 | 1.08E-01 | transcription_start_site | + | 79289  | 79289  | -1433 | 21278 | AN5178 |
| 2170 | CONTIG89 | 77719  | 77993  | 1.31 | 1.08E-01 | transcription_start_site | + | 80060  | 80060  | -2204 | 21279 | AN5179 |
| 2170 | CONTIG89 | 77719  | 77993  | 1.31 | 1.08E-01 | transcription_start_site | + | 82389  | 82389  | -4533 | 21280 | AN5180 |
| 463  | CONTIG89 | 99088  | 99960  | 2.49 | 1.01E-03 | transcription_start_site | - | 98214  | 98214  | -1310 | 21292 | AN5185 |
| 463  | CONTIG89 | 99088  | 99960  | 2.49 | 1.01E-03 | transcription_start_site | - | 97917  | 97917  | -1607 | 21293 | AN5185 |
| 463  | CONTIG89 | 99088  | 99960  | 2.49 | 1.01E-03 | transcription_start_site | - | 97520  | 97520  | -2004 | 21294 | AN5185 |
| 463  | CONTIG89 | 99088  | 99960  | 2.49 | 1.01E-03 | transcription_start_site | + | 99504  | 99504  | 20    | 21296 | AN5186 |
| 463  | CONTIG89 | 99088  | 99960  | 2.49 | 1.01E-03 | transcription_start_site | + | 98958  | 98958  | 566   | 21295 | AN5186 |
| 1400 | CONTIG89 | 105316 | 106700 | 1.63 | 3.70E-02 | transcription_start_site | - | 104539 | 104539 | -1469 | 21297 | AN5187 |
| 1400 | CONTIG89 | 105316 | 106700 | 1.63 | 3.70E-02 | transcription_start_site | - | 104373 | 104373 | -1635 | 21298 | AN5187 |
| 1400 | CONTIG89 | 105316 | 106700 | 1.63 | 3.70E-02 | transcription_start_site | - | 103651 | 103651 | -2357 | 21299 | AN5187 |
| 1400 | CONTIG89 | 105316 | 106700 | 1.63 | 3.70E-02 | transcription_start_site | - | 103567 | 103567 | -2441 | 21300 | AN5187 |
| 1400 | CONTIG89 | 105316 | 106700 | 1.63 | 3.70E-02 | transcription_start_site | - | 102589 | 102589 | -3419 | 21301 | AN5187 |
| 1400 | CONTIG89 | 105316 | 106700 | 1.63 | 3.70E-02 | transcription_start_site | - | 102443 | 102443 | -3565 | 21302 | AN5187 |
| 1726 | CONTIG89 | 104721 | 104975 | 1.49 | 5.88E-02 | transcription_start_site | - | 104539 | 104539 | -309  | 21297 | AN5187 |
| 1726 | CONTIG89 | 104721 | 104975 | 1.49 | 5.88E-02 | transcription_start_site | - | 104373 | 104373 | -475  | 21298 | AN5187 |
| 1726 | CONTIG89 | 104721 | 104975 | 1.49 | 5.88E-02 | transcription_start_site | - | 103651 | 103651 | -1197 | 21299 | AN5187 |

|               |        |        |      |          |                          |   |        |        |       |       |        |
|---------------|--------|--------|------|----------|--------------------------|---|--------|--------|-------|-------|--------|
| 1726 CONTIG89 | 104721 | 104975 | 1.49 | 5.88E-02 | transcription_start_site | - | 103567 | 103567 | -1281 | 21300 | AN5187 |
| 1726 CONTIG89 | 104721 | 104975 | 1.49 | 5.88E-02 | transcription_start_site | - | 102589 | 102589 | -2259 | 21301 | AN5187 |
| 1726 CONTIG89 | 104721 | 104975 | 1.49 | 5.88E-02 | transcription_start_site | - | 102443 | 102443 | -2405 | 21302 | AN5187 |
| 1400 CONTIG89 | 105316 | 106700 | 1.63 | 3.70E-02 | transcription_start_site | - | 106106 | 106106 | 98    | 21304 | AN5188 |
| 1400 CONTIG89 | 105316 | 106700 | 1.63 | 3.70E-02 | transcription_start_site | - | 106533 | 106533 | 525   | 21303 | AN5188 |
| 1400 CONTIG89 | 105316 | 106700 | 1.63 | 3.70E-02 | transcription_start_site | - | 105474 | 105474 | -534  | 21305 | AN5188 |
| 1400 CONTIG89 | 105316 | 106700 | 1.63 | 3.70E-02 | transcription_start_site | - | 104996 | 104996 | -1012 | 21306 | AN5188 |
| 1726 CONTIG89 | 104721 | 104975 | 1.49 | 5.88E-02 | transcription_start_site | - | 104996 | 104996 | 148   | 21306 | AN5188 |
| 1726 CONTIG89 | 104721 | 104975 | 1.49 | 5.88E-02 | transcription_start_site | - | 105474 | 105474 | 626   | 21305 | AN5188 |
| 1400 CONTIG89 | 105316 | 106700 | 1.63 | 3.70E-02 | transcription_start_site | + | 107983 | 107983 | -1975 | 21307 | AN5189 |
| 1400 CONTIG89 | 105316 | 106700 | 1.63 | 3.70E-02 | transcription_start_site | + | 108649 | 108649 | -2641 | 21308 | AN5189 |
| 1400 CONTIG89 | 105316 | 106700 | 1.63 | 3.70E-02 | transcription_start_site | + | 108947 | 108947 | -2939 | 21309 | AN5189 |
| 1726 CONTIG89 | 104721 | 104975 | 1.49 | 5.88E-02 | transcription_start_site | + | 107983 | 107983 | -3135 | 21307 | AN5189 |
| 1726 CONTIG89 | 104721 | 104975 | 1.49 | 5.88E-02 | transcription_start_site | + | 108649 | 108649 | -3801 | 21308 | AN5189 |
| 1726 CONTIG89 | 104721 | 104975 | 1.49 | 5.88E-02 | transcription_start_site | + | 108947 | 108947 | -4099 | 21309 | AN5189 |
| 1400 CONTIG89 | 105316 | 106700 | 1.63 | 3.70E-02 | transcription_start_site | + | 110462 | 110462 | -4454 | 21310 | AN5190 |
| 1400 CONTIG89 | 105316 | 106700 | 1.63 | 3.70E-02 | transcription_start_site | + | 111661 | 111661 | -5653 | 21311 | AN5190 |
| 464 CONTIG89  | 119328 | 119619 | 2.49 | 1.01E-03 | transcription_start_site | - | 114482 | 114482 | -4991 | 21313 | AN5191 |
| 2567 CONTIG89 | 113701 | 114050 | 1.18 | 1.50E-01 | transcription_start_site | - | 113813 | 113813 | -62   | 21314 | AN5191 |
| 2567 CONTIG89 | 113701 | 114050 | 1.18 | 1.50E-01 | transcription_start_site | - | 114482 | 114482 | 606   | 21313 | AN5191 |
| 464 CONTIG89  | 119328 | 119619 | 2.49 | 1.01E-03 | transcription_start_site | - | 117344 | 117344 | -2129 | 21315 | AN5192 |
| 464 CONTIG89  | 119328 | 119619 | 2.49 | 1.01E-03 | transcription_start_site | - | 116849 | 116849 | -2624 | 21316 | AN5192 |
| 464 CONTIG89  | 119328 | 119619 | 2.49 | 1.01E-03 | transcription_start_site | - | 116772 | 116772 | -2701 | 21317 | AN5192 |
| 464 CONTIG89  | 119328 | 119619 | 2.49 | 1.01E-03 | transcription_start_site | - | 115940 | 115940 | -3533 | 21318 | AN5192 |
| 464 CONTIG89  | 119328 | 119619 | 2.49 | 1.01E-03 | transcription_start_site | - | 119065 | 119065 | -408  | 21319 | AN5193 |
| 464 CONTIG89  | 119328 | 119619 | 2.49 | 1.01E-03 | transcription_start_site | - | 118972 | 118972 | -501  | 21320 | AN5193 |
| 464 CONTIG89  | 119328 | 119619 | 2.49 | 1.01E-03 | transcription_start_site | - | 118456 | 118456 | -1017 | 21321 | AN5193 |
| 464 CONTIG89  | 119328 | 119619 | 2.49 | 1.01E-03 | transcription_start_site | + | 120088 | 120088 | -614  | 21322 | AN5194 |
| 464 CONTIG89  | 119328 | 119619 | 2.49 | 1.01E-03 | transcription_start_site | + | 121400 | 121400 | -1926 | 21323 | AN5194 |
| 464 CONTIG89  | 119328 | 119619 | 2.49 | 1.01E-03 | transcription_start_site | + | 122847 | 122847 | -3373 | 21324 | AN5194 |
| 464 CONTIG89  | 119328 | 119619 | 2.49 | 1.01E-03 | transcription_start_site | + | 123662 | 123662 | -4188 | 21325 | AN5195 |
| 464 CONTIG89  | 119328 | 119619 | 2.49 | 1.01E-03 | transcription_start_site | + | 123869 | 123869 | -4395 | 21326 | AN5195 |
| 464 CONTIG89  | 119328 | 119619 | 2.49 | 1.01E-03 | transcription_start_site | + | 124101 | 124101 | -4627 | 21327 | AN5195 |
| 464 CONTIG89  | 119328 | 119619 | 2.49 | 1.01E-03 | transcription_start_site | + | 124229 | 124229 | -4755 | 21328 | AN5195 |
| 224 CONTIG89  | 127218 | 127552 | 2.89 | 0.00E+00 | transcription_start_site | + | 126846 | 126846 | 539   | 21331 | AN5196 |
| 2043 CONTIG89 | 135765 | 136189 | 1.36 | 9.24E-02 | transcription_start_site | - | 132614 | 132614 | -3363 | 21333 | AN5198 |
| 2043 CONTIG89 | 135765 | 136189 | 1.36 | 9.24E-02 | transcription_start_site | - | 132371 | 132371 | -3606 | 21334 | AN5198 |
| 2043 CONTIG89 | 135765 | 136189 | 1.36 | 9.24E-02 | transcription_start_site | - | 132057 | 132057 | -3920 | 21335 | AN5198 |
| 2043 CONTIG89 | 135765 | 136189 | 1.36 | 9.24E-02 | transcription_start_site | - | 131858 | 131858 | -4119 | 21336 | AN5198 |
| 2043 CONTIG89 | 135765 | 136189 | 1.36 | 9.24E-02 | transcription_start_site | - | 131778 | 131778 | -4199 | 21337 | AN5198 |
| 2043 CONTIG89 | 135765 | 136189 | 1.36 | 9.24E-02 | transcription_start_site | - | 131041 | 131041 | -4936 | 21338 | AN5198 |
| 2043 CONTIG89 | 135765 | 136189 | 1.36 | 9.24E-02 | transcription_start_site | - | 134381 | 134381 | -1596 | 21339 | AN5199 |
| 2043 CONTIG89 | 135765 | 136189 | 1.36 | 9.24E-02 | transcription_start_site | - | 134174 | 134174 | -1803 | 21340 | AN5199 |
| 2043 CONTIG89 | 135765 | 136189 | 1.36 | 9.24E-02 | transcription_start_site | - | 133711 | 133711 | -2266 | 21341 | AN5199 |
| 2043 CONTIG89 | 135765 | 136189 | 1.36 | 9.24E-02 | transcription_start_site | + | 135354 | 135354 | 623   | 21344 | AN5200 |
| 2043 CONTIG89 | 135765 | 136189 | 1.36 | 9.24E-02 | transcription_start_site | + | 135084 | 135084 | 893   | 21343 | AN5200 |
| 2043 CONTIG89 | 135765 | 136189 | 1.36 | 9.24E-02 | transcription_start_site | + | 134802 | 134802 | 1175  | 21342 | AN5200 |
| 817 CONTIG89  | 146855 | 147279 | 2.08 | 6.61E-03 | transcription_start_site | - | 142174 | 142174 | -4893 | 21348 | AN5202 |
| 817 CONTIG89  | 146855 | 147279 | 2.08 | 6.61E-03 | transcription_start_site | - | 145540 | 145540 | -1527 | 21351 | AN5203 |
| 817 CONTIG89  | 146855 | 147279 | 2.08 | 6.61E-03 | transcription_start_site | + | 146377 | 146377 | 690   | 21354 | AN5204 |
| 817 CONTIG89  | 146855 | 147279 | 2.08 | 6.61E-03 | transcription_start_site | + | 146160 | 146160 | 907   | 21353 | AN5204 |
| 817 CONTIG89  | 146855 | 147279 | 2.08 | 6.61E-03 | transcription_start_site | + | 146070 | 146070 | 997   | 21352 | AN5204 |
| 2568 CONTIG89 | 153755 | 154044 | 1.18 | 1.66E-01 | transcription_start_site | - | 150562 | 150562 | -3337 | 21355 | AN5205 |
| 2568 CONTIG89 | 153755 | 154044 | 1.18 | 1.66E-01 | transcription_start_site | + | 153777 | 153777 | 122   | 21359 | AN5206 |
| 2568 CONTIG89 | 153755 | 154044 | 1.18 | 1.66E-01 | transcription_start_site | + | 153551 | 153551 | 348   | 21358 | AN5206 |
| 2568 CONTIG89 | 153755 | 154044 | 1.18 | 1.66E-01 | transcription_start_site | + | 153447 | 153447 | 452   | 21357 | AN5206 |
| 2568 CONTIG89 | 153755 | 154044 | 1.18 | 1.66E-01 | transcription_start_site | + | 153353 | 153353 | 546   | 21356 | AN5206 |

|      |          |        |        |      |          |                          |   |        |        |       |       |        |
|------|----------|--------|--------|------|----------|--------------------------|---|--------|--------|-------|-------|--------|
| 1401 | CONTIG89 | 155780 | 156069 | 1.63 | 3.70E-02 | transcription_start_site | - | 155884 | 155884 | -40   | 21360 | AN5207 |
| 1401 | CONTIG89 | 155780 | 156069 | 1.63 | 3.70E-02 | transcription_start_site | - | 155654 | 155654 | -270  | 21361 | AN5207 |
| 1401 | CONTIG89 | 155780 | 156069 | 1.63 | 3.70E-02 | transcription_start_site | - | 155056 | 155056 | -868  | 21362 | AN5207 |
| 2171 | CONTIG89 | 162995 | 163264 | 1.31 | 1.08E-01 | transcription_start_site | - | 159140 | 159140 | -3989 | 21363 | AN5208 |
| 2171 | CONTIG89 | 162995 | 163264 | 1.31 | 1.08E-01 | transcription_start_site | - | 158817 | 158817 | -4312 | 21364 | AN5208 |
| 1401 | CONTIG89 | 155780 | 156069 | 1.63 | 3.70E-02 | transcription_start_site | + | 159729 | 159729 | -3804 | 21365 | AN5209 |
| 1401 | CONTIG89 | 155780 | 156069 | 1.63 | 3.70E-02 | transcription_start_site | + | 161028 | 161028 | -5103 | 21366 | AN5209 |
| 2171 | CONTIG89 | 162995 | 163264 | 1.31 | 1.08E-01 | transcription_start_site | + | 163364 | 163364 | -234  | 21367 | AN5210 |
| 2171 | CONTIG89 | 162995 | 163264 | 1.31 | 1.08E-01 | transcription_start_site | + | 163560 | 163560 | -430  | 21368 | AN5210 |
| 2171 | CONTIG89 | 162995 | 163264 | 1.31 | 1.08E-01 | transcription_start_site | + | 163656 | 163656 | -526  | 21369 | AN5210 |
| 2171 | CONTIG89 | 162995 | 163264 | 1.31 | 1.08E-01 | transcription_start_site | + | 163761 | 163761 | -631  | 21370 | AN5210 |
| 2171 | CONTIG89 | 162995 | 163264 | 1.31 | 1.08E-01 | transcription_start_site | + | 163894 | 163894 | -764  | 21371 | AN5210 |
| 2171 | CONTIG89 | 162995 | 163264 | 1.31 | 1.08E-01 | transcription_start_site | + | 164071 | 164071 | -941  | 21372 | AN5210 |
| 2171 | CONTIG89 | 162995 | 163264 | 1.31 | 1.08E-01 | transcription_start_site | + | 164955 | 164955 | -1825 | 21373 | AN5210 |
| 2171 | CONTIG89 | 162995 | 163264 | 1.31 | 1.08E-01 | transcription_start_site | + | 165086 | 165086 | -1956 | 21374 | AN5210 |
| 731  | CONTIG89 | 181438 | 181780 | 2.17 | 4.61E-03 | transcription_start_site | - | 181089 | 181089 | -520  | 21381 | AN5213 |
| 731  | CONTIG89 | 181438 | 181780 | 2.17 | 4.61E-03 | transcription_start_site | - | 180895 | 180895 | -714  | 21382 | AN5213 |
| 966  | CONTIG89 | 192618 | 193267 | 1.94 | 1.11E-02 | transcription_start_site | - | 189010 | 189010 | -3932 | 21389 | AN5215 |
| 966  | CONTIG89 | 192618 | 193267 | 1.94 | 1.11E-02 | transcription_start_site | - | 188947 | 188947 | -3995 | 21390 | AN5215 |
| 966  | CONTIG89 | 192618 | 193267 | 1.94 | 1.11E-02 | transcription_start_site | + | 193766 | 193766 | -823  | 21392 | AN5217 |
| 966  | CONTIG89 | 192618 | 193267 | 1.94 | 1.11E-02 | transcription_start_site | + | 193937 | 193937 | -994  | 21393 | AN5217 |
| 966  | CONTIG89 | 192618 | 193267 | 1.94 | 1.11E-02 | transcription_start_site | + | 194119 | 194119 | -1176 | 21394 | AN5217 |
| 966  | CONTIG89 | 192618 | 193267 | 1.94 | 1.11E-02 | transcription_start_site | + | 194350 | 194350 | -1407 | 21395 | AN5217 |
| 1598 | CONTIG89 | 200256 | 200530 | 1.54 | 5.22E-02 | transcription_start_site | - | 200058 | 200058 | -335  | 21396 | AN5218 |
| 1598 | CONTIG89 | 200256 | 200530 | 1.54 | 5.22E-02 | transcription_start_site | - | 199217 | 199217 | -1176 | 21397 | AN5218 |
| 1598 | CONTIG89 | 200256 | 200530 | 1.54 | 5.22E-02 | transcription_start_site | - | 201433 | 201433 | 1040  | 21401 | AN5219 |
| 1598 | CONTIG89 | 200256 | 200530 | 1.54 | 5.22E-02 | transcription_start_site | + | 202631 | 202631 | -2238 | 21402 | AN5220 |
| 1598 | CONTIG89 | 200256 | 200530 | 1.54 | 5.22E-02 | transcription_start_site | + | 202799 | 202799 | -2406 | 21403 | AN5220 |
| 1598 | CONTIG89 | 200256 | 200530 | 1.54 | 5.22E-02 | transcription_start_site | + | 202971 | 202971 | -2578 | 21404 | AN5220 |
| 1598 | CONTIG89 | 200256 | 200530 | 1.54 | 5.22E-02 | transcription_start_site | + | 203362 | 203362 | -2969 | 21405 | AN5220 |
| 1598 | CONTIG89 | 200256 | 200530 | 1.54 | 5.22E-02 | transcription_start_site | + | 204081 | 204081 | -3688 | 21406 | AN5220 |
| 1598 | CONTIG89 | 200256 | 200530 | 1.54 | 5.22E-02 | transcription_start_site | + | 204677 | 204677 | -4284 | 21407 | AN5220 |
| 414  | CONTIG89 | 218043 | 218767 | 2.58 | 0.00E+00 | transcription_start_site | - | 214665 | 214665 | -3740 | 21416 | AN5223 |
| 414  | CONTIG89 | 218043 | 218767 | 2.58 | 0.00E+00 | transcription_start_site | - | 214196 | 214196 | -4209 | 21417 | AN5223 |
| 414  | CONTIG89 | 218043 | 218767 | 2.58 | 0.00E+00 | transcription_start_site | - | 214088 | 214088 | -4317 | 21418 | AN5223 |
| 596  | CONTIG89 | 217218 | 218012 | 2.31 | 0.00E+00 | transcription_start_site | - | 214665 | 214665 | -2950 | 21416 | AN5223 |
| 596  | CONTIG89 | 217218 | 218012 | 2.31 | 0.00E+00 | transcription_start_site | - | 214196 | 214196 | -3419 | 21417 | AN5223 |
| 596  | CONTIG89 | 217218 | 218012 | 2.31 | 0.00E+00 | transcription_start_site | - | 214088 | 214088 | -3527 | 21418 | AN5223 |
| 596  | CONTIG89 | 217218 | 218012 | 2.31 | 0.00E+00 | transcription_start_site | + | 216553 | 216553 | 1062  | 21423 | AN5224 |
| 596  | CONTIG89 | 217218 | 218012 | 2.31 | 0.00E+00 | transcription_start_site | + | 216386 | 216386 | 1229  | 21422 | AN5224 |
| 414  | CONTIG89 | 218043 | 218767 | 2.58 | 0.00E+00 | transcription_start_site | + | 218647 | 218647 | -242  | 21424 | AN5225 |
| 414  | CONTIG89 | 218043 | 218767 | 2.58 | 0.00E+00 | transcription_start_site | + | 219609 | 219609 | -1204 | 21425 | AN5225 |
| 414  | CONTIG89 | 218043 | 218767 | 2.58 | 0.00E+00 | transcription_start_site | + | 219970 | 219970 | -1565 | 21426 | AN5225 |
| 414  | CONTIG89 | 218043 | 218767 | 2.58 | 0.00E+00 | transcription_start_site | + | 220131 | 220131 | -1726 | 21427 | AN5225 |
| 596  | CONTIG89 | 217218 | 218012 | 2.31 | 0.00E+00 | transcription_start_site | + | 218647 | 218647 | -1032 | 21424 | AN5225 |
| 596  | CONTIG89 | 217218 | 218012 | 2.31 | 0.00E+00 | transcription_start_site | + | 219609 | 219609 | -1994 | 21425 | AN5225 |
| 596  | CONTIG89 | 217218 | 218012 | 2.31 | 0.00E+00 | transcription_start_site | + | 219970 | 219970 | -2355 | 21426 | AN5225 |
| 596  | CONTIG89 | 217218 | 218012 | 2.31 | 0.00E+00 | transcription_start_site | + | 220131 | 220131 | -2516 | 21427 | AN5225 |
| 24   | CONTIG89 | 224567 | 225366 | 3.57 | 0.00E+00 | transcription_start_site | - | 223332 | 223332 | -1634 | 21428 | AN5226 |
| 24   | CONTIG89 | 224567 | 225366 | 3.57 | 0.00E+00 | transcription_start_site | - | 222866 | 222866 | -2100 | 21429 | AN5226 |
| 24   | CONTIG89 | 224567 | 225366 | 3.57 | 0.00E+00 | transcription_start_site | - | 222641 | 222641 | -2325 | 21430 | AN5226 |
| 765  | CONTIG89 | 227552 | 227901 | 2.13 | 2.32E-03 | transcription_start_site | - | 223332 | 223332 | -4394 | 21428 | AN5226 |
| 765  | CONTIG89 | 227552 | 227901 | 2.13 | 2.32E-03 | transcription_start_site | - | 222866 | 222866 | -4860 | 21429 | AN5226 |
| 765  | CONTIG89 | 227552 | 227901 | 2.13 | 2.32E-03 | transcription_start_site | - | 222641 | 222641 | -5085 | 21430 | AN5226 |
| 765  | CONTIG89 | 227552 | 227901 | 2.13 | 2.32E-03 | transcription_start_site | + | 232393 | 232393 | -4666 | 21431 | AN5227 |
| 765  | CONTIG89 | 227552 | 227901 | 2.13 | 2.32E-03 | transcription_start_site | + | 232572 | 232572 | -4845 | 21432 | AN5227 |
| 2449 | CONTIG89 | 238051 | 239020 | 1.22 | 1.44E-01 | transcription_start_site | - | 237276 | 237276 | -1259 | 21434 | AN5228 |

|      |          |        |        |      |          |                          |   |        |        |       |       |        |
|------|----------|--------|--------|------|----------|--------------------------|---|--------|--------|-------|-------|--------|
| 2569 | CONTIG89 | 236570 | 237204 | 1.18 | 1.66E-01 | transcription_start_site | - | 237276 | 237276 | 389   | 21434 | AN5228 |
| 1926 | CONTIG89 | 242852 | 243216 | 1.4  | 8.01E-02 | transcription_start_site | - | 240909 | 240909 | -2125 | 21435 | AN5229 |
| 1926 | CONTIG89 | 242852 | 243216 | 1.4  | 8.01E-02 | transcription_start_site | - | 240838 | 240838 | -2196 | 21436 | AN5229 |
| 1926 | CONTIG89 | 242852 | 243216 | 1.4  | 8.01E-02 | transcription_start_site | - | 240741 | 240741 | -2293 | 21437 | AN5229 |
| 1926 | CONTIG89 | 242852 | 243216 | 1.4  | 8.01E-02 | transcription_start_site | - | 240326 | 240326 | -2708 | 21438 | AN5229 |
| 1926 | CONTIG89 | 242852 | 243216 | 1.4  | 8.01E-02 | transcription_start_site | - | 238244 | 238244 | -4790 | 21439 | AN5229 |
| 2449 | CONTIG89 | 238051 | 239020 | 1.22 | 1.44E-01 | transcription_start_site | - | 238244 | 238244 | -291  | 21439 | AN5229 |
| 2449 | CONTIG89 | 238051 | 239020 | 1.22 | 1.44E-01 | transcription_start_site | + | 241183 | 241183 | -2647 | 21440 | AN5230 |
| 2449 | CONTIG89 | 238051 | 239020 | 1.22 | 1.44E-01 | transcription_start_site | + | 241705 | 241705 | -3169 | 21441 | AN5230 |
| 2569 | CONTIG89 | 236570 | 237204 | 1.18 | 1.66E-01 | transcription_start_site | + | 241183 | 241183 | -4296 | 21440 | AN5230 |
| 2569 | CONTIG89 | 236570 | 237204 | 1.18 | 1.66E-01 | transcription_start_site | + | 241705 | 241705 | -4818 | 21441 | AN5230 |
| 1926 | CONTIG89 | 242852 | 243216 | 1.4  | 8.01E-02 | transcription_start_site | + | 242821 | 242821 | 213   | 21442 | AN5231 |
| 2449 | CONTIG89 | 238051 | 239020 | 1.22 | 1.44E-01 | transcription_start_site | + | 242821 | 242821 | -4285 | 21442 | AN5231 |
| 2163 | CONTIG89 | 252383 | 253402 | 1.31 | 8.36E-02 | transcription_start_site | - | 249094 | 249094 | -3798 | 21444 | AN5233 |
| 2163 | CONTIG89 | 252383 | 253402 | 1.31 | 8.36E-02 | transcription_start_site | - | 251095 | 251095 | -1797 | 21448 | AN5234 |
| 2163 | CONTIG89 | 252383 | 253402 | 1.31 | 8.36E-02 | transcription_start_site | - | 250702 | 250702 | -2190 | 21449 | AN5234 |
| 2163 | CONTIG89 | 252383 | 253402 | 1.31 | 8.36E-02 | transcription_start_site | + | 251737 | 251737 | 1155  | 21451 | AN5235 |
| 2163 | CONTIG89 | 252383 | 253402 | 1.31 | 8.36E-02 | transcription_start_site | + | 251637 | 251637 | 1255  | 21450 | AN5235 |
| 2163 | CONTIG89 | 252383 | 253402 | 1.31 | 8.36E-02 | transcription_start_site | + | 253706 | 253706 | -813  | 21452 | AN5236 |
| 2163 | CONTIG89 | 252383 | 253402 | 1.31 | 8.36E-02 | transcription_start_site | + | 253963 | 253963 | -1070 | 21453 | AN5236 |
| 2163 | CONTIG89 | 252383 | 253402 | 1.31 | 8.36E-02 | transcription_start_site | + | 254223 | 254223 | -1330 | 21454 | AN5236 |
| 2252 | CONTIG90 | 2486   | 3205   | 1.28 | 5.88E-02 | transcription_start_site | - | 2710   | 2710   | -135  | 21474 | AN5245 |
| 2252 | CONTIG90 | 2486   | 3205   | 1.28 | 5.88E-02 | transcription_start_site | - | 3126   | 3126   | 280   | 21473 | AN5245 |
| 3018 | CONTIG92 | 50483  | 50912  | 0.88 | 5.05E-02 | transcription_start_site | - | 45899  | 45899  | -4798 | 21542 | AN5259 |
| 3018 | CONTIG92 | 50483  | 50912  | 0.88 | 5.05E-02 | transcription_start_site | - | 45699  | 45699  | -4998 | 21543 | AN5259 |
| 3018 | CONTIG92 | 50483  | 50912  | 0.88 | 5.05E-02 | transcription_start_site | - | 45581  | 45581  | -5116 | 21544 | AN5259 |
| 3018 | CONTIG92 | 50483  | 50912  | 0.88 | 5.05E-02 | transcription_start_site | - | 49243  | 49243  | -1454 | 21556 | AN5261 |
| 3018 | CONTIG92 | 50483  | 50912  | 0.88 | 5.05E-02 | transcription_start_site | - | 49172  | 49172  | -1525 | 21557 | AN5261 |
| 3018 | CONTIG92 | 50483  | 50912  | 0.88 | 5.05E-02 | transcription_start_site | - | 48967  | 48967  | -1730 | 21558 | AN5261 |
| 3018 | CONTIG92 | 50483  | 50912  | 0.88 | 5.05E-02 | transcription_start_site | - | 48593  | 48593  | -2104 | 21559 | AN5261 |
| 3018 | CONTIG92 | 50483  | 50912  | 0.88 | 5.05E-02 | transcription_start_site | - | 48362  | 48362  | -2335 | 21560 | AN5261 |
| 3018 | CONTIG92 | 50483  | 50912  | 0.88 | 5.05E-02 | transcription_start_site | + | 50285  | 50285  | 412   | 21562 | AN5262 |
| 3018 | CONTIG92 | 50483  | 50912  | 0.88 | 5.05E-02 | transcription_start_site | + | 51204  | 51204  | -506  | 21563 | AN5262 |
| 3018 | CONTIG92 | 50483  | 50912  | 0.88 | 5.05E-02 | transcription_start_site | + | 49997  | 49997  | 700   | 21561 | AN5262 |
| 829  | CONTIG93 | 25428  | 25867  | 2.07 | 8.81E-03 | transcription_start_site | + | 26242  | 26242  | -594  | 21609 | AN5274 |
| 829  | CONTIG93 | 25428  | 25867  | 2.07 | 8.81E-03 | transcription_start_site | + | 26362  | 26362  | -714  | 21610 | AN5274 |
| 829  | CONTIG93 | 25428  | 25867  | 2.07 | 8.81E-03 | transcription_start_site | + | 26486  | 26486  | -838  | 21611 | AN5274 |
| 829  | CONTIG93 | 25428  | 25867  | 2.07 | 8.81E-03 | transcription_start_site | + | 26882  | 26882  | -1234 | 21612 | AN5274 |
| 829  | CONTIG93 | 25428  | 25867  | 2.07 | 8.81E-03 | transcription_start_site | + | 27848  | 27848  | -2200 | 21613 | AN5274 |
| 829  | CONTIG93 | 25428  | 25867  | 2.07 | 8.81E-03 | transcription_start_site | + | 29070  | 29070  | -3422 | 21614 | AN5275 |
| 829  | CONTIG93 | 25428  | 25867  | 2.07 | 8.81E-03 | transcription_start_site | + | 29161  | 29161  | -3513 | 21615 | AN5275 |
| 829  | CONTIG93 | 25428  | 25867  | 2.07 | 8.81E-03 | transcription_start_site | + | 29542  | 29542  | -3894 | 21616 | AN5275 |
| 829  | CONTIG93 | 25428  | 25867  | 2.07 | 8.81E-03 | transcription_start_site | + | 29823  | 29823  | -4175 | 21617 | AN5275 |
| 829  | CONTIG93 | 25428  | 25867  | 2.07 | 8.81E-03 | transcription_start_site | + | 30228  | 30228  | -4580 | 21618 | AN5275 |
| 829  | CONTIG93 | 25428  | 25867  | 2.07 | 8.81E-03 | transcription_start_site | + | 30791  | 30791  | -5143 | 21619 | AN5275 |
| 377  | CONTIG93 | 55819  | 56090  | 2.64 | 9.51E-04 | transcription_start_site | + | 56062  | 56062  | -107  | 21660 | AN5283 |
| 377  | CONTIG93 | 55819  | 56090  | 2.64 | 9.51E-04 | transcription_start_site | + | 56881  | 56881  | -926  | 21661 | AN5283 |
| 409  | CONTIG93 | 97727  | 98226  | 2.59 | 1.01E-03 | transcription_start_site | - | 97067  | 97067  | -909  | 21709 | AN5295 |
| 409  | CONTIG93 | 97727  | 98226  | 2.59 | 1.01E-03 | transcription_start_site | + | 98122  | 98122  | -145  | 21710 | AN5296 |
| 409  | CONTIG93 | 97727  | 98226  | 2.59 | 1.01E-03 | transcription_start_site | + | 101728 | 101728 | -3751 | 21712 | AN5298 |
| 409  | CONTIG93 | 97727  | 98226  | 2.59 | 1.01E-03 | transcription_start_site | + | 101978 | 101978 | -4001 | 21713 | AN5298 |
| 409  | CONTIG93 | 97727  | 98226  | 2.59 | 1.01E-03 | transcription_start_site | + | 102346 | 102346 | -4369 | 21714 | AN5298 |
| 1291 | CONTIG93 | 140859 | 141358 | 1.7  | 2.18E-02 | transcription_start_site | - | 137064 | 137064 | -4044 | 21742 | AN5309 |
| 1291 | CONTIG93 | 140859 | 141358 | 1.7  | 2.18E-02 | transcription_start_site | - | 136924 | 136924 | -4184 | 21743 | AN5309 |
| 1291 | CONTIG93 | 140859 | 141358 | 1.7  | 2.18E-02 | transcription_start_site | - | 136782 | 136782 | -4326 | 21744 | AN5309 |
| 1291 | CONTIG93 | 140859 | 141358 | 1.7  | 2.18E-02 | transcription_start_site | - | 141152 | 141152 | 43    | 21752 | AN5311 |
| 1291 | CONTIG93 | 140859 | 141358 | 1.7  | 2.18E-02 | transcription_start_site | - | 141479 | 141479 | 370   | 21751 | AN5311 |



|      |          |        |        |      |          |                          |   |        |        |       |       |        |
|------|----------|--------|--------|------|----------|--------------------------|---|--------|--------|-------|-------|--------|
| 1291 | CONTIG93 | 140859 | 141358 | 1.7  | 2.18E-02 | transcription_start_site | - | 141714 | 141714 | 605   | 21750 | AN5311 |
| 1291 | CONTIG93 | 140859 | 141358 | 1.7  | 2.18E-02 | transcription_start_site | - | 141963 | 141963 | 854   | 21749 | AN5311 |
| 1551 | CONTIG93 | 142964 | 144063 | 1.56 | 3.99E-02 | transcription_start_site | - | 141963 | 141963 | -1550 | 21749 | AN5311 |
| 1551 | CONTIG93 | 142964 | 144063 | 1.56 | 3.99E-02 | transcription_start_site | - | 141714 | 141714 | -1799 | 21750 | AN5311 |
| 1551 | CONTIG93 | 142964 | 144063 | 1.56 | 3.99E-02 | transcription_start_site | - | 141479 | 141479 | -2034 | 21751 | AN5311 |
| 1551 | CONTIG93 | 142964 | 144063 | 1.56 | 3.99E-02 | transcription_start_site | - | 141152 | 141152 | -2361 | 21752 | AN5311 |
| 1291 | CONTIG93 | 140859 | 141358 | 1.7  | 2.18E-02 | transcription_start_site | + | 144794 | 144794 | -3685 | 21753 | AN5312 |
| 1291 | CONTIG93 | 140859 | 141358 | 1.7  | 2.18E-02 | transcription_start_site | + | 145038 | 145038 | -3929 | 21754 | AN5312 |
| 1291 | CONTIG93 | 140859 | 141358 | 1.7  | 2.18E-02 | transcription_start_site | + | 145322 | 145322 | -4213 | 21755 | AN5312 |
| 1291 | CONTIG93 | 140859 | 141358 | 1.7  | 2.18E-02 | transcription_start_site | + | 145520 | 145520 | -4411 | 21756 | AN5312 |
| 1291 | CONTIG93 | 140859 | 141358 | 1.7  | 2.18E-02 | transcription_start_site | + | 145710 | 145710 | -4601 | 21757 | AN5312 |
| 1551 | CONTIG93 | 142964 | 144063 | 1.56 | 3.99E-02 | transcription_start_site | + | 144794 | 144794 | -1280 | 21753 | AN5312 |
| 1551 | CONTIG93 | 142964 | 144063 | 1.56 | 3.99E-02 | transcription_start_site | + | 145038 | 145038 | -1524 | 21754 | AN5312 |
| 1551 | CONTIG93 | 142964 | 144063 | 1.56 | 3.99E-02 | transcription_start_site | + | 145322 | 145322 | -1808 | 21755 | AN5312 |
| 1551 | CONTIG93 | 142964 | 144063 | 1.56 | 3.99E-02 | transcription_start_site | + | 145520 | 145520 | -2006 | 21756 | AN5312 |
| 1551 | CONTIG93 | 142964 | 144063 | 1.56 | 3.99E-02 | transcription_start_site | + | 145710 | 145710 | -2196 | 21757 | AN5312 |
| 532  | CONTIG93 | 163960 | 164244 | 2.4  | 2.22E-03 | transcription_start_site | - | 161650 | 161650 | -2452 | 21767 | AN5317 |
| 532  | CONTIG93 | 163960 | 164244 | 2.4  | 2.22E-03 | transcription_start_site | - | 161143 | 161143 | -2959 | 21768 | AN5317 |
| 2010 | CONTIG93 | 164420 | 165070 | 1.37 | 9.26E-02 | transcription_start_site | - | 161650 | 161650 | -3095 | 21767 | AN5317 |
| 2010 | CONTIG93 | 164420 | 165070 | 1.37 | 9.26E-02 | transcription_start_site | - | 161143 | 161143 | -3602 | 21768 | AN5317 |
| 532  | CONTIG93 | 163960 | 164244 | 2.4  | 2.22E-03 | transcription_start_site | + | 164592 | 164592 | -490  | 21769 | AN5318 |
| 2010 | CONTIG93 | 164420 | 165070 | 1.37 | 9.26E-02 | transcription_start_site | + | 164592 | 164592 | 153   | 21769 | AN5318 |
| 165  | CONTIG93 | 181576 | 181870 | 3.02 | 0.00E+00 | transcription_start_site | - | 177062 | 177062 | -4661 | 21778 | AN5321 |
| 165  | CONTIG93 | 181576 | 181870 | 3.02 | 0.00E+00 | transcription_start_site | - | 176713 | 176713 | -5010 | 21779 | AN5321 |
| 165  | CONTIG93 | 181576 | 181870 | 3.02 | 0.00E+00 | transcription_start_site | - | 180921 | 180921 | -802  | 21784 | AN5323 |
| 165  | CONTIG93 | 181576 | 181870 | 3.02 | 0.00E+00 | transcription_start_site | - | 180508 | 180508 | -1215 | 21785 | AN5323 |
| 165  | CONTIG93 | 181576 | 181870 | 3.02 | 0.00E+00 | transcription_start_site | - | 180379 | 180379 | -1344 | 21786 | AN5323 |
| 165  | CONTIG93 | 181576 | 181870 | 3.02 | 0.00E+00 | transcription_start_site | - | 179992 | 179992 | -1731 | 21787 | AN5323 |
| 345  | CONTIG93 | 183241 | 184571 | 2.69 | 0.00E+00 | transcription_start_site | - | 180921 | 180921 | -2985 | 21784 | AN5323 |
| 345  | CONTIG93 | 183241 | 184571 | 2.69 | 0.00E+00 | transcription_start_site | - | 180508 | 180508 | -3398 | 21785 | AN5323 |
| 345  | CONTIG93 | 183241 | 184571 | 2.69 | 0.00E+00 | transcription_start_site | - | 180379 | 180379 | -3527 | 21786 | AN5323 |
| 345  | CONTIG93 | 183241 | 184571 | 2.69 | 0.00E+00 | transcription_start_site | - | 179992 | 179992 | -3914 | 21787 | AN5323 |
| 1025 | CONTIG93 | 185105 | 185459 | 1.89 | 1.84E-02 | transcription_start_site | - | 180921 | 180921 | -4361 | 21784 | AN5323 |
| 1025 | CONTIG93 | 185105 | 185459 | 1.89 | 1.84E-02 | transcription_start_site | - | 180508 | 180508 | -4774 | 21785 | AN5323 |
| 1025 | CONTIG93 | 185105 | 185459 | 1.89 | 1.84E-02 | transcription_start_site | - | 180379 | 180379 | -4903 | 21786 | AN5323 |
| 2141 | CONTIG93 | 182336 | 182975 | 1.32 | 1.25E-01 | transcription_start_site | - | 180921 | 180921 | -1734 | 21784 | AN5323 |
| 2141 | CONTIG93 | 182336 | 182975 | 1.32 | 1.25E-01 | transcription_start_site | - | 180508 | 180508 | -2147 | 21785 | AN5323 |
| 2141 | CONTIG93 | 182336 | 182975 | 1.32 | 1.25E-01 | transcription_start_site | - | 180379 | 180379 | -2276 | 21786 | AN5323 |
| 2141 | CONTIG93 | 182336 | 182975 | 1.32 | 1.25E-01 | transcription_start_site | - | 179992 | 179992 | -2663 | 21787 | AN5323 |
| 345  | CONTIG93 | 183241 | 184571 | 2.69 | 0.00E+00 | transcription_start_site | - | 184515 | 184515 | 609   | 21788 | AN5324 |
| 345  | CONTIG93 | 183241 | 184571 | 2.69 | 0.00E+00 | transcription_start_site | - | 183047 | 183047 | -859  | 21789 | AN5324 |
| 1025 | CONTIG93 | 185105 | 185459 | 1.89 | 1.84E-02 | transcription_start_site | - | 184515 | 184515 | -767  | 21788 | AN5324 |
| 1025 | CONTIG93 | 185105 | 185459 | 1.89 | 1.84E-02 | transcription_start_site | - | 183047 | 183047 | -2235 | 21789 | AN5324 |
| 2141 | CONTIG93 | 182336 | 182975 | 1.32 | 1.25E-01 | transcription_start_site | - | 183047 | 183047 | 391   | 21789 | AN5324 |
| 345  | CONTIG93 | 183241 | 184571 | 2.69 | 0.00E+00 | transcription_start_site | + | 188097 | 188097 | -4191 | 21790 | AN5325 |
| 345  | CONTIG93 | 183241 | 184571 | 2.69 | 0.00E+00 | transcription_start_site | + | 188419 | 188419 | -4513 | 21791 | AN5325 |
| 1025 | CONTIG93 | 185105 | 185459 | 1.89 | 1.84E-02 | transcription_start_site | + | 188097 | 188097 | -2815 | 21790 | AN5325 |
| 1025 | CONTIG93 | 185105 | 185459 | 1.89 | 1.84E-02 | transcription_start_site | + | 188419 | 188419 | -3137 | 21791 | AN5325 |
| 345  | CONTIG93 | 183241 | 184571 | 2.69 | 0.00E+00 | transcription_start_site | + | 189394 | 189394 | -5488 | 21792 | AN5326 |
| 1025 | CONTIG93 | 185105 | 185459 | 1.89 | 1.84E-02 | transcription_start_site | + | 189394 | 189394 | -4112 | 21792 | AN5326 |
| 1025 | CONTIG93 | 185105 | 185459 | 1.89 | 1.84E-02 | transcription_start_site | + | 189769 | 189769 | -4487 | 21793 | AN5326 |
| 1025 | CONTIG93 | 185105 | 185459 | 1.89 | 1.84E-02 | transcription_start_site | + | 190053 | 190053 | -4771 | 21794 | AN5326 |
| 1025 | CONTIG93 | 185105 | 185459 | 1.89 | 1.84E-02 | transcription_start_site | + | 190337 | 190337 | -5055 | 21795 | AN5326 |
| 1559 | CONTIG93 | 231089 | 231443 | 1.56 | 5.88E-02 | transcription_start_site | - | 227053 | 227053 | -4213 | 21825 | AN5339 |
| 1559 | CONTIG93 | 231089 | 231443 | 1.56 | 5.88E-02 | transcription_start_site | - | 226890 | 226890 | -4376 | 21826 | AN5339 |
| 1559 | CONTIG93 | 231089 | 231443 | 1.56 | 5.88E-02 | transcription_start_site | - | 226605 | 226605 | -4661 | 21827 | AN5339 |
| 145  | CONTIG93 | 233264 | 233618 | 3.06 | 0.00E+00 | transcription_start_site | - | 228558 | 228558 | -4883 | 21828 | AN5340 |

|      |          |        |        |      |          |                          |   |        |        |       |       |        |
|------|----------|--------|--------|------|----------|--------------------------|---|--------|--------|-------|-------|--------|
| 1559 | CONTIG93 | 231089 | 231443 | 1.56 | 5.88E-02 | transcription_start_site | - | 228558 | 228558 | -2708 | 21828 | AN5340 |
| 145  | CONTIG93 | 233264 | 233618 | 3.06 | 0.00E+00 | transcription_start_site | + | 232580 | 232580 | 861   | 21830 | AN5341 |
| 145  | CONTIG93 | 233264 | 233618 | 3.06 | 0.00E+00 | transcription_start_site | + | 232371 | 232371 | 1070  | 21829 | AN5341 |
| 1559 | CONTIG93 | 231089 | 231443 | 1.56 | 5.88E-02 | transcription_start_site | + | 232371 | 232371 | -1105 | 21829 | AN5341 |
| 1559 | CONTIG93 | 231089 | 231443 | 1.56 | 5.88E-02 | transcription_start_site | + | 232580 | 232580 | -1314 | 21830 | AN5341 |
| 145  | CONTIG93 | 233264 | 233618 | 3.06 | 0.00E+00 | transcription_start_site | + | 233821 | 233821 | -380  | 21831 | AN5342 |
| 145  | CONTIG93 | 233264 | 233618 | 3.06 | 0.00E+00 | transcription_start_site | + | 234206 | 234206 | -765  | 21832 | AN5342 |
| 1559 | CONTIG93 | 231089 | 231443 | 1.56 | 5.88E-02 | transcription_start_site | + | 233821 | 233821 | -2555 | 21831 | AN5342 |
| 1559 | CONTIG93 | 231089 | 231443 | 1.56 | 5.88E-02 | transcription_start_site | + | 234206 | 234206 | -2940 | 21832 | AN5342 |
| 2142 | CONTIG93 | 256285 | 256564 | 1.32 | 1.25E-01 | transcription_start_site | - | 253021 | 253021 | -3403 | 21854 | AN5349 |
| 2142 | CONTIG93 | 256285 | 256564 | 1.32 | 1.25E-01 | transcription_start_site | - | 252936 | 252936 | -3488 | 21855 | AN5349 |
| 2142 | CONTIG93 | 256285 | 256564 | 1.32 | 1.25E-01 | transcription_start_site | - | 252566 | 252566 | -3858 | 21856 | AN5349 |
| 872  | CONTIG93 | 258170 | 258504 | 2.03 | 1.11E-02 | transcription_start_site | - | 256217 | 256217 | -2120 | 21860 | AN5351 |
| 872  | CONTIG93 | 258170 | 258504 | 2.03 | 1.11E-02 | transcription_start_site | - | 255965 | 255965 | -2372 | 21861 | AN5351 |
| 872  | CONTIG93 | 258170 | 258504 | 2.03 | 1.11E-02 | transcription_start_site | - | 255802 | 255802 | -2535 | 21862 | AN5351 |
| 2142 | CONTIG93 | 256285 | 256564 | 1.32 | 1.25E-01 | transcription_start_site | - | 256217 | 256217 | -207  | 21860 | AN5351 |
| 2142 | CONTIG93 | 256285 | 256564 | 1.32 | 1.25E-01 | transcription_start_site | - | 255965 | 255965 | -459  | 21861 | AN5351 |
| 2142 | CONTIG93 | 256285 | 256564 | 1.32 | 1.25E-01 | transcription_start_site | - | 255802 | 255802 | -622  | 21862 | AN5351 |
| 346  | CONTIG93 | 264980 | 265344 | 2.69 | 8.69E-04 | transcription_start_site | - | 262385 | 262385 | -2777 | 21863 | AN5353 |
| 346  | CONTIG93 | 264980 | 265344 | 2.69 | 8.69E-04 | transcription_start_site | - | 262246 | 262246 | -2916 | 21864 | AN5353 |
| 636  | CONTIG93 | 267320 | 267579 | 2.26 | 4.61E-03 | transcription_start_site | - | 262385 | 262385 | -5064 | 21863 | AN5353 |
| 1161 | CONTIG93 | 266030 | 266314 | 1.79 | 2.62E-02 | transcription_start_site | - | 262385 | 262385 | -3787 | 21863 | AN5353 |
| 1161 | CONTIG93 | 266030 | 266314 | 1.79 | 2.62E-02 | transcription_start_site | - | 262246 | 262246 | -3926 | 21864 | AN5353 |
| 346  | CONTIG93 | 264980 | 265344 | 2.69 | 8.69E-04 | transcription_start_site | + | 265652 | 265652 | -490  | 21865 | AN5354 |
| 346  | CONTIG93 | 264980 | 265344 | 2.69 | 8.69E-04 | transcription_start_site | + | 265778 | 265778 | -616  | 21866 | AN5354 |
| 346  | CONTIG93 | 264980 | 265344 | 2.69 | 8.69E-04 | transcription_start_site | + | 266126 | 266126 | -964  | 21867 | AN5354 |
| 1161 | CONTIG93 | 266030 | 266314 | 1.79 | 2.62E-02 | transcription_start_site | + | 266126 | 266126 | 46    | 21867 | AN5354 |
| 1161 | CONTIG93 | 266030 | 266314 | 1.79 | 2.62E-02 | transcription_start_site | + | 265778 | 265778 | 394   | 21866 | AN5354 |
| 1161 | CONTIG93 | 266030 | 266314 | 1.79 | 2.62E-02 | transcription_start_site | + | 265652 | 265652 | 520   | 21865 | AN5354 |
| 346  | CONTIG93 | 264980 | 265344 | 2.69 | 8.69E-04 | transcription_start_site | + | 267703 | 267703 | -2541 | 21868 | AN5355 |
| 346  | CONTIG93 | 264980 | 265344 | 2.69 | 8.69E-04 | transcription_start_site | + | 267948 | 267948 | -2786 | 21869 | AN5355 |
| 636  | CONTIG93 | 267320 | 267579 | 2.26 | 4.61E-03 | transcription_start_site | + | 267703 | 267703 | -253  | 21868 | AN5355 |
| 636  | CONTIG93 | 267320 | 267579 | 2.26 | 4.61E-03 | transcription_start_site | + | 267948 | 267948 | -498  | 21869 | AN5355 |
| 1161 | CONTIG93 | 266030 | 266314 | 1.79 | 2.62E-02 | transcription_start_site | + | 267703 | 267703 | -1531 | 21868 | AN5355 |
| 1161 | CONTIG93 | 266030 | 266314 | 1.79 | 2.62E-02 | transcription_start_site | + | 267948 | 267948 | -1776 | 21869 | AN5355 |
| 407  | CONTIG93 | 272560 | 273214 | 2.59 | 0.00E+00 | transcription_start_site | - | 272549 | 272549 | -338  | 21870 | AN5356 |
| 407  | CONTIG93 | 272560 | 273214 | 2.59 | 0.00E+00 | transcription_start_site | - | 272249 | 272249 | -638  | 21871 | AN5356 |
| 407  | CONTIG93 | 272560 | 273214 | 2.59 | 0.00E+00 | transcription_start_site | - | 272147 | 272147 | -740  | 21872 | AN5356 |
| 407  | CONTIG93 | 272560 | 273214 | 2.59 | 0.00E+00 | transcription_start_site | - | 271468 | 271468 | -1419 | 21873 | AN5356 |
| 115  | CONTIG93 | 279615 | 279954 | 3.16 | 0.00E+00 | transcription_start_site | - | 279054 | 279054 | -730  | 21874 | AN5357 |
| 115  | CONTIG93 | 279615 | 279954 | 3.16 | 0.00E+00 | transcription_start_site | - | 278922 | 278922 | -862  | 21875 | AN5357 |
| 115  | CONTIG93 | 279615 | 279954 | 3.16 | 0.00E+00 | transcription_start_site | - | 278694 | 278694 | -1090 | 21876 | AN5357 |
| 115  | CONTIG93 | 279615 | 279954 | 3.16 | 0.00E+00 | transcription_start_site | - | 278229 | 278229 | -1555 | 21877 | AN5357 |
| 2419 | CONTIG93 | 280888 | 281527 | 1.23 | 1.50E-01 | transcription_start_site | - | 279054 | 279054 | -2153 | 21874 | AN5357 |
| 2419 | CONTIG93 | 280888 | 281527 | 1.23 | 1.50E-01 | transcription_start_site | - | 278922 | 278922 | -2285 | 21875 | AN5357 |
| 2419 | CONTIG93 | 280888 | 281527 | 1.23 | 1.50E-01 | transcription_start_site | - | 278694 | 278694 | -2513 | 21876 | AN5357 |
| 2419 | CONTIG93 | 280888 | 281527 | 1.23 | 1.50E-01 | transcription_start_site | - | 278229 | 278229 | -2978 | 21877 | AN5357 |
| 2572 | CONTIG93 | 278410 | 278981 | 1.18 | 1.93E-01 | transcription_start_site | - | 278694 | 278694 | -1    | 21876 | AN5357 |
| 2572 | CONTIG93 | 278410 | 278981 | 1.18 | 1.93E-01 | transcription_start_site | - | 278922 | 278922 | 226   | 21875 | AN5357 |
| 2572 | CONTIG93 | 278410 | 278981 | 1.18 | 1.93E-01 | transcription_start_site | - | 279054 | 279054 | 358   | 21874 | AN5357 |
| 2572 | CONTIG93 | 278410 | 278981 | 1.18 | 1.93E-01 | transcription_start_site | - | 278229 | 278229 | -466  | 21877 | AN5357 |
| 115  | CONTIG93 | 279615 | 279954 | 3.16 | 0.00E+00 | transcription_start_site | - | 280005 | 280005 | 220   | 21880 | AN5358 |
| 115  | CONTIG93 | 279615 | 279954 | 3.16 | 0.00E+00 | transcription_start_site | - | 280424 | 280424 | 639   | 21879 | AN5358 |
| 115  | CONTIG93 | 279615 | 279954 | 3.16 | 0.00E+00 | transcription_start_site | - | 280582 | 280582 | 797   | 21878 | AN5358 |
| 2419 | CONTIG93 | 280888 | 281527 | 1.23 | 1.50E-01 | transcription_start_site | - | 280582 | 280582 | -625  | 21878 | AN5358 |
| 2419 | CONTIG93 | 280888 | 281527 | 1.23 | 1.50E-01 | transcription_start_site | - | 280424 | 280424 | -783  | 21879 | AN5358 |
| 2419 | CONTIG93 | 280888 | 281527 | 1.23 | 1.50E-01 | transcription_start_site | - | 280005 | 280005 | -1202 | 21880 | AN5358 |

|      |          |        |        |      |          |                          |   |        |        |       |       |        |
|------|----------|--------|--------|------|----------|--------------------------|---|--------|--------|-------|-------|--------|
| 2419 | CONTIG93 | 280888 | 281527 | 1.23 | 1.50E-01 | transcription_start_site | - | 281511 | 281511 | 303   | 21881 | AN5359 |
| 115  | CONTIG93 | 279615 | 279954 | 3.16 | 0.00E+00 | transcription_start_site | + | 282134 | 282134 | -2349 | 21882 | AN5360 |
| 115  | CONTIG93 | 279615 | 279954 | 3.16 | 0.00E+00 | transcription_start_site | + | 283301 | 283301 | -3516 | 21883 | AN5360 |
| 115  | CONTIG93 | 279615 | 279954 | 3.16 | 0.00E+00 | transcription_start_site | + | 283464 | 283464 | -3679 | 21884 | AN5360 |
| 115  | CONTIG93 | 279615 | 279954 | 3.16 | 0.00E+00 | transcription_start_site | + | 283717 | 283717 | -3932 | 21885 | AN5360 |
| 115  | CONTIG93 | 279615 | 279954 | 3.16 | 0.00E+00 | transcription_start_site | + | 283909 | 283909 | -4124 | 21886 | AN5360 |
| 115  | CONTIG93 | 279615 | 279954 | 3.16 | 0.00E+00 | transcription_start_site | + | 284016 | 284016 | -4231 | 21887 | AN5360 |
| 2419 | CONTIG93 | 280888 | 281527 | 1.23 | 1.50E-01 | transcription_start_site | + | 282134 | 282134 | -926  | 21882 | AN5360 |
| 2419 | CONTIG93 | 280888 | 281527 | 1.23 | 1.50E-01 | transcription_start_site | + | 283301 | 283301 | -2093 | 21883 | AN5360 |
| 2419 | CONTIG93 | 280888 | 281527 | 1.23 | 1.50E-01 | transcription_start_site | + | 283464 | 283464 | -2256 | 21884 | AN5360 |
| 2419 | CONTIG93 | 280888 | 281527 | 1.23 | 1.50E-01 | transcription_start_site | + | 283717 | 283717 | -2509 | 21885 | AN5360 |
| 2419 | CONTIG93 | 280888 | 281527 | 1.23 | 1.50E-01 | transcription_start_site | + | 283909 | 283909 | -2701 | 21886 | AN5360 |
| 2419 | CONTIG93 | 280888 | 281527 | 1.23 | 1.50E-01 | transcription_start_site | + | 284016 | 284016 | -2808 | 21887 | AN5360 |
| 2572 | CONTIG93 | 278410 | 278981 | 1.18 | 1.93E-01 | transcription_start_site | + | 282134 | 282134 | -3438 | 21882 | AN5360 |
| 2572 | CONTIG93 | 278410 | 278981 | 1.18 | 1.93E-01 | transcription_start_site | + | 283301 | 283301 | -4605 | 21883 | AN5360 |
| 2572 | CONTIG93 | 278410 | 278981 | 1.18 | 1.93E-01 | transcription_start_site | + | 283464 | 283464 | -4768 | 21884 | AN5360 |
| 2572 | CONTIG93 | 278410 | 278981 | 1.18 | 1.93E-01 | transcription_start_site | + | 283717 | 283717 | -5021 | 21885 | AN5360 |
| 2572 | CONTIG93 | 278410 | 278981 | 1.18 | 1.93E-01 | transcription_start_site | + | 283909 | 283909 | -5213 | 21886 | AN5360 |
| 2419 | CONTIG93 | 280888 | 281527 | 1.23 | 1.50E-01 | transcription_start_site | + | 285862 | 285862 | -4654 | 21888 | AN5361 |
| 2015 | CONTIG93 | 286958 | 287302 | 1.37 | 1.08E-01 | transcription_start_site | - | 288299 | 288299 | 1169  | 21890 | AN5362 |
| 2015 | CONTIG93 | 286958 | 287302 | 1.37 | 1.08E-01 | transcription_start_site | + | 292231 | 292231 | -5101 | 21896 | AN5364 |
| 1560 | CONTIG93 | 297393 | 297654 | 1.56 | 5.88E-02 | transcription_start_site | - | 297475 | 297475 | -48   | 21898 | AN5365 |
| 1560 | CONTIG93 | 297393 | 297654 | 1.56 | 5.88E-02 | transcription_start_site | - | 296807 | 296807 | -716  | 21899 | AN5365 |
| 1231 | CONTIG93 | 303841 | 304190 | 1.74 | 1.81E-02 | transcription_start_site | - | 298867 | 298867 | -5148 | 21900 | AN5366 |
| 1560 | CONTIG93 | 297393 | 297654 | 1.56 | 5.88E-02 | transcription_start_site | - | 298226 | 298226 | 702   | 21904 | AN5366 |
| 1560 | CONTIG93 | 297393 | 297654 | 1.56 | 5.88E-02 | transcription_start_site | - | 298338 | 298338 | 814   | 21903 | AN5366 |
| 1560 | CONTIG93 | 297393 | 297654 | 1.56 | 5.88E-02 | transcription_start_site | - | 298452 | 298452 | 928   | 21902 | AN5366 |
| 1560 | CONTIG93 | 297393 | 297654 | 1.56 | 5.88E-02 | transcription_start_site | + | 299345 | 299345 | -1821 | 21905 | AN5367 |
| 1560 | CONTIG93 | 297393 | 297654 | 1.56 | 5.88E-02 | transcription_start_site | + | 299735 | 299735 | -2211 | 21906 | AN5367 |
| 1560 | CONTIG93 | 297393 | 297654 | 1.56 | 5.88E-02 | transcription_start_site | + | 299848 | 299848 | -2324 | 21907 | AN5367 |
| 1560 | CONTIG93 | 297393 | 297654 | 1.56 | 5.88E-02 | transcription_start_site | + | 301164 | 301164 | -3640 | 21908 | AN5367 |
| 1560 | CONTIG93 | 297393 | 297654 | 1.56 | 5.88E-02 | transcription_start_site | + | 302581 | 302581 | -5057 | 21909 | AN5368 |
| 1231 | CONTIG93 | 303841 | 304190 | 1.74 | 1.81E-02 | transcription_start_site | + | 303962 | 303962 | 53    | 21910 | AN5369 |
| 1231 | CONTIG93 | 303841 | 304190 | 1.74 | 1.81E-02 | transcription_start_site | + | 304430 | 304430 | -414  | 21911 | AN5369 |
| 1231 | CONTIG93 | 303841 | 304190 | 1.74 | 1.81E-02 | transcription_start_site | + | 305652 | 305652 | -1636 | 21912 | AN5369 |
| 2573 | CONTIG93 | 304596 | 305010 | 1.18 | 1.93E-01 | transcription_start_site | + | 304430 | 304430 | 373   | 21911 | AN5369 |
| 2573 | CONTIG93 | 304596 | 305010 | 1.18 | 1.93E-01 | transcription_start_site | + | 303962 | 303962 | 841   | 21910 | AN5369 |
| 2573 | CONTIG93 | 304596 | 305010 | 1.18 | 1.93E-01 | transcription_start_site | + | 305652 | 305652 | -849  | 21912 | AN5369 |
| 1231 | CONTIG93 | 303841 | 304190 | 1.74 | 1.81E-02 | transcription_start_site | + | 307531 | 307531 | -3515 | 21913 | AN5370 |
| 1231 | CONTIG93 | 303841 | 304190 | 1.74 | 1.81E-02 | transcription_start_site | + | 307894 | 307894 | -3878 | 21914 | AN5370 |
| 1231 | CONTIG93 | 303841 | 304190 | 1.74 | 1.81E-02 | transcription_start_site | + | 308154 | 308154 | -4138 | 21915 | AN5370 |
| 1231 | CONTIG93 | 303841 | 304190 | 1.74 | 1.81E-02 | transcription_start_site | + | 308352 | 308352 | -4336 | 21916 | AN5370 |
| 1231 | CONTIG93 | 303841 | 304190 | 1.74 | 1.81E-02 | transcription_start_site | + | 308562 | 308562 | -4546 | 21917 | AN5370 |
| 1231 | CONTIG93 | 303841 | 304190 | 1.74 | 1.81E-02 | transcription_start_site | + | 309137 | 309137 | -5121 | 21918 | AN5370 |
| 2573 | CONTIG93 | 304596 | 305010 | 1.18 | 1.93E-01 | transcription_start_site | + | 307531 | 307531 | -2728 | 21913 | AN5370 |
| 2573 | CONTIG93 | 304596 | 305010 | 1.18 | 1.93E-01 | transcription_start_site | + | 307894 | 307894 | -3091 | 21914 | AN5370 |
| 2573 | CONTIG93 | 304596 | 305010 | 1.18 | 1.93E-01 | transcription_start_site | + | 308154 | 308154 | -3351 | 21915 | AN5370 |
| 2573 | CONTIG93 | 304596 | 305010 | 1.18 | 1.93E-01 | transcription_start_site | + | 308352 | 308352 | -3549 | 21916 | AN5370 |
| 2573 | CONTIG93 | 304596 | 305010 | 1.18 | 1.93E-01 | transcription_start_site | + | 308562 | 308562 | -3759 | 21917 | AN5370 |
| 2573 | CONTIG93 | 304596 | 305010 | 1.18 | 1.93E-01 | transcription_start_site | + | 309137 | 309137 | -4334 | 21918 | AN5370 |
| 2573 | CONTIG93 | 304596 | 305010 | 1.18 | 1.93E-01 | transcription_start_site | + | 309390 | 309390 | -4587 | 21919 | AN5370 |
| 8    | CONTIG93 | 312463 | 312730 | 3.77 | 0.00E+00 | transcription_start_site | - | 312434 | 312434 | -162  | 21920 | AN5371 |
| 8    | CONTIG93 | 312463 | 312730 | 3.77 | 0.00E+00 | transcription_start_site | - | 311124 | 311124 | -1472 | 21921 | AN5371 |
| 8    | CONTIG93 | 312463 | 312730 | 3.77 | 0.00E+00 | transcription_start_site | - | 311052 | 311052 | -1544 | 21922 | AN5371 |
| 1906 | CONTIG93 | 319139 | 319418 | 1.41 | 9.24E-02 | transcription_start_site | - | 314620 | 314620 | -4658 | 21923 | AN5372 |
| 1906 | CONTIG93 | 319139 | 319418 | 1.41 | 9.24E-02 | transcription_start_site | - | 314554 | 314554 | -4724 | 21924 | AN5372 |
| 1906 | CONTIG93 | 319139 | 319418 | 1.41 | 9.24E-02 | transcription_start_site | - | 316670 | 316670 | -2608 | 21925 | AN5373 |

|               |        |        |      |          |                          |   |        |        |       |       |        |
|---------------|--------|--------|------|----------|--------------------------|---|--------|--------|-------|-------|--------|
| 1906 CONTIG93 | 319139 | 319418 | 1.41 | 9.24E-02 | transcription_start_site | - | 316540 | 316540 | -2738 | 21926 | AN5373 |
| 8 CONTIG93    | 312463 | 312730 | 3.77 | 0.00E+00 | transcription_start_site | + | 317583 | 317583 | -4986 | 21927 | AN5374 |
| 1906 CONTIG93 | 319139 | 319418 | 1.41 | 9.24E-02 | transcription_start_site | - | 319919 | 319919 | 640   | 21928 | AN5375 |
| 1906 CONTIG93 | 319139 | 319418 | 1.41 | 9.24E-02 | transcription_start_site | + | 320318 | 320318 | -1039 | 21929 | AN5376 |
| 1906 CONTIG93 | 319139 | 319418 | 1.41 | 9.24E-02 | transcription_start_site | + | 320699 | 320699 | -1420 | 21930 | AN5376 |
| 1906 CONTIG93 | 319139 | 319418 | 1.41 | 9.24E-02 | transcription_start_site | + | 321170 | 321170 | -1891 | 21931 | AN5376 |
| 1906 CONTIG93 | 319139 | 319418 | 1.41 | 9.24E-02 | transcription_start_site | + | 321392 | 321392 | -2113 | 21932 | AN5376 |
| 1447 CONTIG94 | 3546   | 3885   | 1.61 | 1.84E-02 | transcription_start_site | - | 1102   | 1102   | -2613 | 21958 | AN5382 |
| 1447 CONTIG94 | 3546   | 3885   | 1.61 | 1.84E-02 | transcription_start_site | + | 5741   | 5741   | -2025 | 21960 | AN5384 |
| 1447 CONTIG94 | 3546   | 3885   | 1.61 | 1.84E-02 | transcription_start_site | + | 5838   | 5838   | -2122 | 21961 | AN5384 |
| 1447 CONTIG94 | 3546   | 3885   | 1.61 | 1.84E-02 | transcription_start_site | + | 8600   | 8600   | -4884 | 21962 | AN5385 |
| 2851 CONTIG94 | 30301  | 30810  | 1.04 | 1.66E-01 | transcription_start_site | - | 25394  | 25394  | -5161 | 21968 | AN5390 |
| 2851 CONTIG94 | 30301  | 30810  | 1.04 | 1.66E-01 | transcription_start_site | - | 31453  | 31453  | 897   | 21978 | AN5393 |
| 2851 CONTIG94 | 30301  | 30810  | 1.04 | 1.66E-01 | transcription_start_site | + | 32289  | 32289  | -1733 | 21979 | AN5394 |
| 2851 CONTIG94 | 30301  | 30810  | 1.04 | 1.66E-01 | transcription_start_site | + | 32511  | 32511  | -1955 | 21980 | AN5394 |
| 2851 CONTIG94 | 30301  | 30810  | 1.04 | 1.66E-01 | transcription_start_site | + | 32755  | 32755  | -2199 | 21981 | AN5394 |
| 2851 CONTIG94 | 30301  | 30810  | 1.04 | 1.66E-01 | transcription_start_site | + | 33173  | 33173  | -2617 | 21982 | AN5394 |
| 2851 CONTIG94 | 30301  | 30810  | 1.04 | 1.66E-01 | transcription_start_site | + | 33510  | 33510  | -2954 | 21983 | AN5394 |
| 2851 CONTIG94 | 30301  | 30810  | 1.04 | 1.66E-01 | transcription_start_site | + | 33678  | 33678  | -3122 | 21984 | AN5394 |
| 2851 CONTIG94 | 30301  | 30810  | 1.04 | 1.66E-01 | transcription_start_site | + | 34616  | 34616  | -4060 | 21985 | AN5395 |
| 2851 CONTIG94 | 30301  | 30810  | 1.04 | 1.66E-01 | transcription_start_site | + | 34724  | 34724  | -4168 | 21986 | AN5395 |
| 2851 CONTIG94 | 30301  | 30810  | 1.04 | 1.66E-01 | transcription_start_site | + | 34785  | 34785  | -4229 | 21987 | AN5395 |
| 2851 CONTIG94 | 30301  | 30810  | 1.04 | 1.66E-01 | transcription_start_site | + | 34960  | 34960  | -4404 | 21988 | AN5395 |
| 2851 CONTIG94 | 30301  | 30810  | 1.04 | 1.66E-01 | transcription_start_site | + | 35414  | 35414  | -4858 | 21989 | AN5395 |
| 1819 CONTIG94 | 51845  | 52644  | 1.44 | 2.18E-02 | transcription_start_site | - | 48132  | 48132  | -4112 | 21995 | AN5398 |
| 1819 CONTIG94 | 51845  | 52644  | 1.44 | 2.18E-02 | transcription_start_site | - | 52313  | 52313  | 68    | 21996 | AN5399 |
| 1819 CONTIG94 | 51845  | 52644  | 1.44 | 2.18E-02 | transcription_start_site | - | 51300  | 51300  | -944  | 21997 | AN5399 |
| 2852 CONTIG94 | 65412  | 65914  | 1.04 | 1.66E-01 | transcription_start_site | - | 61152  | 61152  | -4511 | 22004 | AN5401 |
| 2852 CONTIG94 | 65412  | 65914  | 1.04 | 1.66E-01 | transcription_start_site | - | 61047  | 61047  | -4616 | 22005 | AN5401 |
| 2852 CONTIG94 | 65412  | 65914  | 1.04 | 1.66E-01 | transcription_start_site | - | 60839  | 60839  | -4824 | 22006 | AN5401 |
| 2249 CONTIG94 | 67445  | 68679  | 1.28 | 4.42E-02 | transcription_start_site | - | 65170  | 65170  | -2892 | 22007 | AN5402 |
| 2249 CONTIG94 | 67445  | 68679  | 1.28 | 4.42E-02 | transcription_start_site | - | 64955  | 64955  | -3107 | 22008 | AN5402 |
| 2249 CONTIG94 | 67445  | 68679  | 1.28 | 4.42E-02 | transcription_start_site | - | 64633  | 64633  | -3429 | 22009 | AN5402 |
| 2852 CONTIG94 | 65412  | 65914  | 1.04 | 1.66E-01 | transcription_start_site | - | 65170  | 65170  | -493  | 22007 | AN5402 |
| 2852 CONTIG94 | 65412  | 65914  | 1.04 | 1.66E-01 | transcription_start_site | - | 64955  | 64955  | -708  | 22008 | AN5402 |
| 2852 CONTIG94 | 65412  | 65914  | 1.04 | 1.66E-01 | transcription_start_site | - | 64633  | 64633  | -1030 | 22009 | AN5402 |
| 2904 CONTIG94 | 69980  | 70700  | 1    | 1.79E-01 | transcription_start_site | - | 65170  | 65170  | -5170 | 22007 | AN5402 |
| 2249 CONTIG94 | 67445  | 68679  | 1.28 | 4.42E-02 | transcription_start_site | - | 67785  | 67785  | -277  | 22013 | AN5403 |
| 2249 CONTIG94 | 67445  | 68679  | 1.28 | 4.42E-02 | transcription_start_site | - | 67438  | 67438  | -624  | 22014 | AN5403 |
| 2904 CONTIG94 | 69980  | 70700  | 1    | 1.79E-01 | transcription_start_site | - | 70380  | 70380  | 40    | 22012 | AN5403 |
| 2904 CONTIG94 | 69980  | 70700  | 1    | 1.79E-01 | transcription_start_site | - | 70517  | 70517  | 177   | 22011 | AN5403 |
| 2904 CONTIG94 | 69980  | 70700  | 1    | 1.79E-01 | transcription_start_site | - | 70750  | 70750  | 410   | 22010 | AN5403 |
| 2904 CONTIG94 | 69980  | 70700  | 1    | 1.79E-01 | transcription_start_site | - | 67785  | 67785  | -2555 | 22013 | AN5403 |
| 2904 CONTIG94 | 69980  | 70700  | 1    | 1.79E-01 | transcription_start_site | - | 67438  | 67438  | -2902 | 22014 | AN5403 |
| 2911 CONTIG94 | 71706  | 72650  | 1    | 1.93E-01 | transcription_start_site | - | 70750  | 70750  | -1428 | 22010 | AN5403 |
| 2911 CONTIG94 | 71706  | 72650  | 1    | 1.93E-01 | transcription_start_site | - | 70517  | 70517  | -1661 | 22011 | AN5403 |
| 2911 CONTIG94 | 71706  | 72650  | 1    | 1.93E-01 | transcription_start_site | - | 70380  | 70380  | -1798 | 22012 | AN5403 |
| 2911 CONTIG94 | 71706  | 72650  | 1    | 1.93E-01 | transcription_start_site | - | 67785  | 67785  | -4393 | 22013 | AN5403 |
| 2911 CONTIG94 | 71706  | 72650  | 1    | 1.93E-01 | transcription_start_site | - | 67438  | 67438  | -4740 | 22014 | AN5403 |
| 2249 CONTIG94 | 67445  | 68679  | 1.28 | 4.42E-02 | transcription_start_site | + | 72128  | 72128  | -4066 | 22015 | AN5404 |
| 2249 CONTIG94 | 67445  | 68679  | 1.28 | 4.42E-02 | transcription_start_site | + | 72322  | 72322  | -4260 | 22016 | AN5404 |
| 2249 CONTIG94 | 67445  | 68679  | 1.28 | 4.42E-02 | transcription_start_site | + | 72397  | 72397  | -4335 | 22017 | AN5404 |
| 2249 CONTIG94 | 67445  | 68679  | 1.28 | 4.42E-02 | transcription_start_site | + | 72567  | 72567  | -4505 | 22018 | AN5404 |
| 2249 CONTIG94 | 67445  | 68679  | 1.28 | 4.42E-02 | transcription_start_site | + | 72658  | 72658  | -4596 | 22019 | AN5404 |
| 2249 CONTIG94 | 67445  | 68679  | 1.28 | 4.42E-02 | transcription_start_site | + | 72826  | 72826  | -4764 | 22020 | AN5404 |
| 2249 CONTIG94 | 67445  | 68679  | 1.28 | 4.42E-02 | transcription_start_site | + | 73085  | 73085  | -5023 | 22021 | AN5404 |
| 2904 CONTIG94 | 69980  | 70700  | 1    | 1.79E-01 | transcription_start_site | + | 72128  | 72128  | -1788 | 22015 | AN5404 |

|               |        |        |      |          |                          |   |        |        |       |       |        |
|---------------|--------|--------|------|----------|--------------------------|---|--------|--------|-------|-------|--------|
| 2904 CONTIG94 | 69980  | 70700  | 1    | 1.79E-01 | transcription_start_site | + | 72322  | 72322  | -1982 | 22016 | AN5404 |
| 2904 CONTIG94 | 69980  | 70700  | 1    | 1.79E-01 | transcription_start_site | + | 72397  | 72397  | -2057 | 22017 | AN5404 |
| 2904 CONTIG94 | 69980  | 70700  | 1    | 1.79E-01 | transcription_start_site | + | 72567  | 72567  | -2227 | 22018 | AN5404 |
| 2904 CONTIG94 | 69980  | 70700  | 1    | 1.79E-01 | transcription_start_site | + | 72658  | 72658  | -2318 | 22019 | AN5404 |
| 2904 CONTIG94 | 69980  | 70700  | 1    | 1.79E-01 | transcription_start_site | + | 72826  | 72826  | -2486 | 22020 | AN5404 |
| 2904 CONTIG94 | 69980  | 70700  | 1    | 1.79E-01 | transcription_start_site | + | 73085  | 73085  | -2745 | 22021 | AN5404 |
| 2911 CONTIG94 | 71706  | 72650  | 1    | 1.93E-01 | transcription_start_site | + | 72128  | 72128  | 50    | 22015 | AN5404 |
| 2911 CONTIG94 | 71706  | 72650  | 1    | 1.93E-01 | transcription_start_site | + | 72322  | 72322  | -144  | 22016 | AN5404 |
| 2911 CONTIG94 | 71706  | 72650  | 1    | 1.93E-01 | transcription_start_site | + | 72397  | 72397  | -219  | 22017 | AN5404 |
| 2911 CONTIG94 | 71706  | 72650  | 1    | 1.93E-01 | transcription_start_site | + | 72567  | 72567  | -389  | 22018 | AN5404 |
| 2911 CONTIG94 | 71706  | 72650  | 1    | 1.93E-01 | transcription_start_site | + | 72658  | 72658  | -480  | 22019 | AN5404 |
| 2911 CONTIG94 | 71706  | 72650  | 1    | 1.93E-01 | transcription_start_site | + | 72826  | 72826  | -648  | 22020 | AN5404 |
| 2911 CONTIG94 | 71706  | 72650  | 1    | 1.93E-01 | transcription_start_site | + | 73085  | 73085  | -907  | 22021 | AN5404 |
| 2911 CONTIG94 | 71706  | 72650  | 1    | 1.93E-01 | transcription_start_site | + | 76974  | 76974  | -4796 | 22022 | AN5405 |
| 2911 CONTIG94 | 71706  | 72650  | 1    | 1.93E-01 | transcription_start_site | + | 77377  | 77377  | -5199 | 22023 | AN5405 |
| 2911 CONTIG94 | 71706  | 72650  | 1    | 1.93E-01 | transcription_start_site | + | 77539  | 77539  | -5361 | 22024 | AN5405 |
| 1822 CONTIG94 | 86108  | 86682  | 1.44 | 3.70E-02 | transcription_start_site | - | 85127  | 85127  | -1268 | 22026 | AN5406 |
| 1822 CONTIG94 | 86108  | 86682  | 1.44 | 3.70E-02 | transcription_start_site | - | 84989  | 84989  | -1406 | 22027 | AN5406 |
| 1822 CONTIG94 | 86108  | 86682  | 1.44 | 3.70E-02 | transcription_start_site | - | 84647  | 84647  | -1748 | 22028 | AN5406 |
| 1822 CONTIG94 | 86108  | 86682  | 1.44 | 3.70E-02 | transcription_start_site | - | 81614  | 81614  | -4781 | 22029 | AN5406 |
| 1822 CONTIG94 | 86108  | 86682  | 1.44 | 3.70E-02 | transcription_start_site | + | 86989  | 86989  | -594  | 22030 | AN5407 |
| 1822 CONTIG94 | 86108  | 86682  | 1.44 | 3.70E-02 | transcription_start_site | + | 87392  | 87392  | -997  | 22031 | AN5407 |
| 1822 CONTIG94 | 86108  | 86682  | 1.44 | 3.70E-02 | transcription_start_site | + | 88048  | 88048  | -1653 | 22032 | AN5407 |
| 1822 CONTIG94 | 86108  | 86682  | 1.44 | 3.70E-02 | transcription_start_site | + | 88449  | 88449  | -2054 | 22033 | AN5407 |
| 1822 CONTIG94 | 86108  | 86682  | 1.44 | 3.70E-02 | transcription_start_site | + | 91318  | 91318  | -4923 | 22034 | AN5408 |
| 1822 CONTIG94 | 86108  | 86682  | 1.44 | 3.70E-02 | transcription_start_site | + | 91588  | 91588  | -5193 | 22035 | AN5408 |
| 2609 CONTIG94 | 139052 | 139491 | 1.16 | 1.08E-01 | transcription_start_site | - | 135486 | 135486 | -3785 | 22080 | AN5425 |
| 2609 CONTIG94 | 139052 | 139491 | 1.16 | 1.08E-01 | transcription_start_site | - | 135390 | 135390 | -3881 | 22081 | AN5425 |
| 2609 CONTIG94 | 139052 | 139491 | 1.16 | 1.08E-01 | transcription_start_site | - | 135018 | 135018 | -4253 | 22082 | AN5425 |
| 2912 CONTIG94 | 136367 | 136641 | 1    | 1.93E-01 | transcription_start_site | - | 135486 | 135486 | -1018 | 22080 | AN5425 |
| 2912 CONTIG94 | 136367 | 136641 | 1    | 1.93E-01 | transcription_start_site | - | 135390 | 135390 | -1114 | 22081 | AN5425 |
| 2912 CONTIG94 | 136367 | 136641 | 1    | 1.93E-01 | transcription_start_site | - | 135018 | 135018 | -1486 | 22082 | AN5425 |
| 2609 CONTIG94 | 139052 | 139491 | 1.16 | 1.08E-01 | transcription_start_site | - | 137059 | 137059 | -2212 | 22083 | AN5426 |
| 2912 CONTIG94 | 136367 | 136641 | 1    | 1.93E-01 | transcription_start_site | - | 137059 | 137059 | 555   | 22083 | AN5426 |
| 2609 CONTIG94 | 139052 | 139491 | 1.16 | 1.08E-01 | transcription_start_site | - | 138951 | 138951 | -320  | 22088 | AN5427 |
| 2609 CONTIG94 | 139052 | 139491 | 1.16 | 1.08E-01 | transcription_start_site | - | 139855 | 139855 | 583   | 22087 | AN5427 |
| 1823 CONTIG94 | 149331 | 149750 | 1.44 | 3.70E-02 | transcription_start_site | - | 144880 | 144880 | -4660 | 22089 | AN5428 |
| 1823 CONTIG94 | 149331 | 149750 | 1.44 | 3.70E-02 | transcription_start_site | - | 144590 | 144590 | -4950 | 22090 | AN5428 |
| 1823 CONTIG94 | 149331 | 149750 | 1.44 | 3.70E-02 | transcription_start_site | - | 144367 | 144367 | -5173 | 22091 | AN5428 |
| 1823 CONTIG94 | 149331 | 149750 | 1.44 | 3.70E-02 | transcription_start_site | - | 150516 | 150516 | 975   | 22094 | AN5430 |
| 1823 CONTIG94 | 149331 | 149750 | 1.44 | 3.70E-02 | transcription_start_site | - | 150658 | 150658 | 1117  | 22093 | AN5430 |
| 1823 CONTIG94 | 149331 | 149750 | 1.44 | 3.70E-02 | transcription_start_site | + | 152944 | 152944 | -3403 | 22095 | AN5431 |
| 1823 CONTIG94 | 149331 | 149750 | 1.44 | 3.70E-02 | transcription_start_site | + | 153193 | 153193 | -3652 | 22096 | AN5431 |
| 1823 CONTIG94 | 149331 | 149750 | 1.44 | 3.70E-02 | transcription_start_site | + | 154344 | 154344 | -4803 | 22097 | AN5431 |
| 1823 CONTIG94 | 149331 | 149750 | 1.44 | 3.70E-02 | transcription_start_site | + | 154503 | 154503 | -4962 | 22098 | AN5431 |
| 2610 CONTIG94 | 171314 | 171750 | 1.16 | 1.08E-01 | transcription_start_site | + | 174432 | 174432 | -2900 | 22119 | AN5437 |
| 2610 CONTIG94 | 171314 | 171750 | 1.16 | 1.08E-01 | transcription_start_site | + | 174488 | 174488 | -2956 | 22120 | AN5437 |
| 2610 CONTIG94 | 171314 | 171750 | 1.16 | 1.08E-01 | transcription_start_site | + | 174736 | 174736 | -3204 | 22121 | AN5437 |
| 2610 CONTIG94 | 171314 | 171750 | 1.16 | 1.08E-01 | transcription_start_site | + | 174873 | 174873 | -3341 | 22122 | AN5437 |
| 2610 CONTIG94 | 171314 | 171750 | 1.16 | 1.08E-01 | transcription_start_site | + | 175268 | 175268 | -3736 | 22123 | AN5437 |
| 2610 CONTIG94 | 171314 | 171750 | 1.16 | 1.08E-01 | transcription_start_site | + | 175505 | 175505 | -3973 | 22124 | AN5437 |
| 1368 CONTIG94 | 180004 | 180580 | 1.65 | 1.57E-02 | transcription_start_site | - | 179279 | 179279 | -1013 | 22125 | AN5438 |
| 1368 CONTIG94 | 180004 | 180580 | 1.65 | 1.57E-02 | transcription_start_site | - | 178919 | 178919 | -1373 | 22126 | AN5438 |
| 1368 CONTIG94 | 180004 | 180580 | 1.65 | 1.57E-02 | transcription_start_site | - | 178576 | 178576 | -1716 | 22127 | AN5438 |
| 1368 CONTIG94 | 180004 | 180580 | 1.65 | 1.57E-02 | transcription_start_site | + | 179715 | 179715 | 577   | 22128 | AN5439 |
| 1368 CONTIG94 | 180004 | 180580 | 1.65 | 1.57E-02 | transcription_start_site | + | 180621 | 180621 | -329  | 22129 | AN5440 |
| 1368 CONTIG94 | 180004 | 180580 | 1.65 | 1.57E-02 | transcription_start_site | + | 180794 | 180794 | -502  | 22130 | AN5440 |

|      |          |        |        |      |          |                          |   |        |        |       |       |        |
|------|----------|--------|--------|------|----------|--------------------------|---|--------|--------|-------|-------|--------|
| 1368 | CONTIG94 | 180004 | 180580 | 1.65 | 1.57E-02 | transcription_start_site | + | 183708 | 183708 | -3416 | 22131 | AN5441 |
| 1368 | CONTIG94 | 180004 | 180580 | 1.65 | 1.57E-02 | transcription_start_site | + | 183944 | 183944 | -3652 | 22132 | AN5441 |
| 1368 | CONTIG94 | 180004 | 180580 | 1.65 | 1.57E-02 | transcription_start_site | + | 184228 | 184228 | -3936 | 22133 | AN5441 |
| 559  | CONTIG94 | 194568 | 194977 | 2.37 | 6.10E-04 | transcription_start_site | - | 190371 | 190371 | -4401 | 22137 | AN5444 |
| 2372 | CONTIG94 | 193438 | 193792 | 1.24 | 8.01E-02 | transcription_start_site | - | 190371 | 190371 | -3244 | 22137 | AN5444 |
| 559  | CONTIG94 | 194568 | 194977 | 2.37 | 6.10E-04 | transcription_start_site | - | 193856 | 193856 | -916  | 22138 | AN5445 |
| 559  | CONTIG94 | 194568 | 194977 | 2.37 | 6.10E-04 | transcription_start_site | - | 193453 | 193453 | -1319 | 22139 | AN5445 |
| 2372 | CONTIG94 | 193438 | 193792 | 1.24 | 8.01E-02 | transcription_start_site | - | 193453 | 193453 | -162  | 22139 | AN5445 |
| 2372 | CONTIG94 | 193438 | 193792 | 1.24 | 8.01E-02 | transcription_start_site | - | 193856 | 193856 | 241   | 22138 | AN5445 |
| 2707 | CONTIG94 | 197038 | 197392 | 1.12 | 1.25E-01 | transcription_start_site | - | 193856 | 193856 | -3359 | 22138 | AN5445 |
| 2707 | CONTIG94 | 197038 | 197392 | 1.12 | 1.25E-01 | transcription_start_site | - | 193453 | 193453 | -3762 | 22139 | AN5445 |
| 559  | CONTIG94 | 194568 | 194977 | 2.37 | 6.10E-04 | transcription_start_site | + | 196941 | 196941 | -2168 | 22140 | AN5446 |
| 559  | CONTIG94 | 194568 | 194977 | 2.37 | 6.10E-04 | transcription_start_site | + | 197168 | 197168 | -2395 | 22141 | AN5446 |
| 559  | CONTIG94 | 194568 | 194977 | 2.37 | 6.10E-04 | transcription_start_site | + | 197517 | 197517 | -2744 | 22142 | AN5446 |
| 2372 | CONTIG94 | 193438 | 193792 | 1.24 | 8.01E-02 | transcription_start_site | + | 196941 | 196941 | -3326 | 22140 | AN5446 |
| 2372 | CONTIG94 | 193438 | 193792 | 1.24 | 8.01E-02 | transcription_start_site | + | 197168 | 197168 | -3553 | 22141 | AN5446 |
| 2372 | CONTIG94 | 193438 | 193792 | 1.24 | 8.01E-02 | transcription_start_site | + | 197517 | 197517 | -3902 | 22142 | AN5446 |
| 2707 | CONTIG94 | 197038 | 197392 | 1.12 | 1.25E-01 | transcription_start_site | + | 197168 | 197168 | 47    | 22141 | AN5446 |
| 2707 | CONTIG94 | 197038 | 197392 | 1.12 | 1.25E-01 | transcription_start_site | + | 196941 | 196941 | 274   | 22140 | AN5446 |
| 2707 | CONTIG94 | 197038 | 197392 | 1.12 | 1.25E-01 | transcription_start_site | + | 197517 | 197517 | -302  | 22142 | AN5446 |
| 559  | CONTIG94 | 194568 | 194977 | 2.37 | 6.10E-04 | transcription_start_site | + | 199831 | 199831 | -5058 | 22143 | AN5447 |
| 1070 | CONTIG94 | 202353 | 202852 | 1.85 | 6.61E-03 | transcription_start_site | + | 201413 | 201413 | 1189  | 22146 | AN5447 |
| 2707 | CONTIG94 | 197038 | 197392 | 1.12 | 1.25E-01 | transcription_start_site | + | 199831 | 199831 | -2616 | 22143 | AN5447 |
| 2707 | CONTIG94 | 197038 | 197392 | 1.12 | 1.25E-01 | transcription_start_site | + | 200116 | 200116 | -2901 | 22144 | AN5447 |
| 2707 | CONTIG94 | 197038 | 197392 | 1.12 | 1.25E-01 | transcription_start_site | + | 200192 | 200192 | -2977 | 22145 | AN5447 |
| 2707 | CONTIG94 | 197038 | 197392 | 1.12 | 1.25E-01 | transcription_start_site | + | 201413 | 201413 | -4198 | 22146 | AN5447 |
| 1070 | CONTIG94 | 202353 | 202852 | 1.85 | 6.61E-03 | transcription_start_site | + | 201971 | 201971 | 631   | 22147 | AN5448 |
| 1070 | CONTIG94 | 202353 | 202852 | 1.85 | 6.61E-03 | transcription_start_site | + | 203272 | 203272 | -669  | 22148 | AN5448 |
| 2509 | CONTIG94 | 203943 | 204217 | 1.2  | 9.24E-02 | transcription_start_site | + | 203272 | 203272 | 808   | 22148 | AN5448 |
| 2707 | CONTIG94 | 197038 | 197392 | 1.12 | 1.25E-01 | transcription_start_site | + | 201971 | 201971 | -4756 | 22147 | AN5448 |
| 342  | CONTIG94 | 209265 | 209529 | 2.69 | 0.00E+00 | transcription_start_site | - | 208052 | 208052 | -1345 | 22149 | AN5449 |
| 342  | CONTIG94 | 209265 | 209529 | 2.69 | 0.00E+00 | transcription_start_site | - | 207586 | 207586 | -1811 | 22150 | AN5449 |
| 1020 | CONTIG94 | 206415 | 206979 | 1.89 | 1.46E-03 | transcription_start_site | - | 207586 | 207586 | 889   | 22150 | AN5449 |
| 1448 | CONTIG94 | 207830 | 208414 | 1.61 | 1.84E-02 | transcription_start_site | - | 208052 | 208052 | -70   | 22149 | AN5449 |
| 1448 | CONTIG94 | 207830 | 208414 | 1.61 | 1.84E-02 | transcription_start_site | - | 207586 | 207586 | -536  | 22150 | AN5449 |
| 2782 | CONTIG94 | 207080 | 207659 | 1.08 | 1.44E-01 | transcription_start_site | - | 207586 | 207586 | 216   | 22150 | AN5449 |
| 2782 | CONTIG94 | 207080 | 207659 | 1.08 | 1.44E-01 | transcription_start_site | - | 208052 | 208052 | 682   | 22149 | AN5449 |
| 1121 | CONTIG94 | 215420 | 215694 | 1.81 | 7.85E-03 | transcription_start_site | - | 212841 | 212841 | -2716 | 22151 | AN5450 |
| 1121 | CONTIG94 | 215420 | 215694 | 1.81 | 7.85E-03 | transcription_start_site | - | 212698 | 212698 | -2859 | 22152 | AN5450 |
| 1121 | CONTIG94 | 215420 | 215694 | 1.81 | 7.85E-03 | transcription_start_site | - | 211326 | 211326 | -4231 | 22153 | AN5450 |
| 1121 | CONTIG94 | 215420 | 215694 | 1.81 | 7.85E-03 | transcription_start_site | - | 210818 | 210818 | -4739 | 22154 | AN5450 |
| 1121 | CONTIG94 | 215420 | 215694 | 1.81 | 7.85E-03 | transcription_start_site | - | 210541 | 210541 | -5016 | 22155 | AN5450 |
| 1121 | CONTIG94 | 215420 | 215694 | 1.81 | 7.85E-03 | transcription_start_site | - | 215347 | 215347 | -210  | 22156 | AN5451 |
| 1121 | CONTIG94 | 215420 | 215694 | 1.81 | 7.85E-03 | transcription_start_site | - | 214821 | 214821 | -736  | 22157 | AN5451 |
| 1121 | CONTIG94 | 215420 | 215694 | 1.81 | 7.85E-03 | transcription_start_site | + | 216008 | 216008 | -451  | 22158 | AN5452 |
| 1121 | CONTIG94 | 215420 | 215694 | 1.81 | 7.85E-03 | transcription_start_site | + | 216425 | 216425 | -868  | 22159 | AN5452 |
| 1121 | CONTIG94 | 215420 | 215694 | 1.81 | 7.85E-03 | transcription_start_site | + | 218693 | 218693 | -3136 | 22160 | AN5452 |
| 1121 | CONTIG94 | 215420 | 215694 | 1.81 | 7.85E-03 | transcription_start_site | + | 220038 | 220038 | -4481 | 22161 | AN5452 |
| 855  | CONTIG94 | 227630 | 227909 | 2.05 | 2.22E-03 | transcription_start_site | + | 227965 | 227965 | -195  | 22169 | AN5454 |
| 855  | CONTIG94 | 227630 | 227909 | 2.05 | 2.22E-03 | transcription_start_site | + | 227321 | 227321 | 448   | 22168 | AN5454 |
| 855  | CONTIG94 | 227630 | 227909 | 2.05 | 2.22E-03 | transcription_start_site | + | 227170 | 227170 | 599   | 22167 | AN5454 |
| 855  | CONTIG94 | 227630 | 227909 | 2.05 | 2.22E-03 | transcription_start_site | + | 227043 | 227043 | 726   | 22166 | AN5454 |
| 1071 | CONTIG94 | 252692 | 253031 | 1.85 | 6.61E-03 | transcription_start_site | - | 249539 | 249539 | -3322 | 22187 | AN5460 |
| 1071 | CONTIG94 | 252692 | 253031 | 1.85 | 6.61E-03 | transcription_start_site | - | 249394 | 249394 | -3467 | 22188 | AN5460 |
| 1071 | CONTIG94 | 252692 | 253031 | 1.85 | 6.61E-03 | transcription_start_site | - | 249174 | 249174 | -3687 | 22189 | AN5460 |
| 1071 | CONTIG94 | 252692 | 253031 | 1.85 | 6.61E-03 | transcription_start_site | - | 248835 | 248835 | -4026 | 22190 | AN5460 |
| 1071 | CONTIG94 | 252692 | 253031 | 1.85 | 6.61E-03 | transcription_start_site | - | 248707 | 248707 | -4154 | 22191 | AN5460 |



|      |          |        |        |      |          |                          |   |        |        |       |       |        |
|------|----------|--------|--------|------|----------|--------------------------|---|--------|--------|-------|-------|--------|
| 1071 | CONTIG94 | 252692 | 253031 | 1.85 | 6.61E-03 | transcription_start_site | - | 248613 | 248613 | -4248 | 22192 | AN5460 |
| 1071 | CONTIG94 | 252692 | 253031 | 1.85 | 6.61E-03 | transcription_start_site | - | 248433 | 248433 | -4428 | 22193 | AN5460 |
| 1071 | CONTIG94 | 252692 | 253031 | 1.85 | 6.61E-03 | transcription_start_site | - | 247998 | 247998 | -4863 | 22194 | AN5460 |
| 1071 | CONTIG94 | 252692 | 253031 | 1.85 | 6.61E-03 | transcription_start_site | - | 247784 | 247784 | -5077 | 22195 | AN5460 |
| 1071 | CONTIG94 | 252692 | 253031 | 1.85 | 6.61E-03 | transcription_start_site | - | 252715 | 252715 | -146  | 22197 | AN5461 |
| 1071 | CONTIG94 | 252692 | 253031 | 1.85 | 6.61E-03 | transcription_start_site | + | 254216 | 254216 | -1354 | 22198 | AN5462 |
| 1071 | CONTIG94 | 252692 | 253031 | 1.85 | 6.61E-03 | transcription_start_site | + | 254486 | 254486 | -1624 | 22199 | AN5462 |
| 1071 | CONTIG94 | 252692 | 253031 | 1.85 | 6.61E-03 | transcription_start_site | + | 256660 | 256660 | -3798 | 22200 | AN5463 |
| 1071 | CONTIG94 | 252692 | 253031 | 1.85 | 6.61E-03 | transcription_start_site | + | 256821 | 256821 | -3959 | 22201 | AN5463 |
| 1824 | CONTIG94 | 314029 | 314693 | 1.44 | 3.70E-02 | transcription_start_site | + | 313488 | 313488 | 873   | 22255 | AN5479 |
| 1824 | CONTIG94 | 314029 | 314693 | 1.44 | 3.70E-02 | transcription_start_site | - | 315026 | 315026 | 665   | 22258 | AN5480 |
| 1824 | CONTIG94 | 314029 | 314693 | 1.44 | 3.70E-02 | transcription_start_site | - | 315215 | 315215 | 854   | 22257 | AN5480 |
| 1824 | CONTIG94 | 314029 | 314693 | 1.44 | 3.70E-02 | transcription_start_site | - | 315459 | 315459 | 1098  | 22256 | AN5480 |
| 1916 | CONTIG94 | 315604 | 315878 | 1.4  | 4.36E-02 | transcription_start_site | - | 315459 | 315459 | -282  | 22256 | AN5480 |
| 1916 | CONTIG94 | 315604 | 315878 | 1.4  | 4.36E-02 | transcription_start_site | - | 315215 | 315215 | -526  | 22257 | AN5480 |
| 1916 | CONTIG94 | 315604 | 315878 | 1.4  | 4.36E-02 | transcription_start_site | - | 315026 | 315026 | -715  | 22258 | AN5480 |
| 368  | CONTIG94 | 354921 | 355870 | 2.65 | 0.00E+00 | transcription_start_site | - | 350844 | 350844 | -4551 | 22282 | AN5488 |
| 726  | CONTIG94 | 351246 | 352410 | 2.17 | 0.00E+00 | transcription_start_site | - | 350844 | 350844 | -984  | 22282 | AN5488 |
| 726  | CONTIG94 | 351246 | 352410 | 2.17 | 0.00E+00 | transcription_start_site | - | 348869 | 348869 | -2959 | 22283 | AN5488 |
| 726  | CONTIG94 | 351246 | 352410 | 2.17 | 0.00E+00 | transcription_start_site | - | 348224 | 348224 | -3604 | 22284 | AN5488 |
| 726  | CONTIG94 | 351246 | 352410 | 2.17 | 0.00E+00 | transcription_start_site | - | 347953 | 347953 | -3875 | 22285 | AN5488 |
| 726  | CONTIG94 | 351246 | 352410 | 2.17 | 0.00E+00 | transcription_start_site | - | 347867 | 347867 | -3961 | 22286 | AN5488 |
| 726  | CONTIG94 | 351246 | 352410 | 2.17 | 0.00E+00 | transcription_start_site | - | 346939 | 346939 | -4889 | 22287 | AN5488 |
| 726  | CONTIG94 | 351246 | 352410 | 2.17 | 0.00E+00 | transcription_start_site | - | 346635 | 346635 | -5193 | 22288 | AN5488 |
| 368  | CONTIG94 | 354921 | 355870 | 2.65 | 0.00E+00 | transcription_start_site | + | 355655 | 355655 | -259  | 22295 | AN5489 |
| 726  | CONTIG94 | 351246 | 352410 | 2.17 | 0.00E+00 | transcription_start_site | + | 355655 | 355655 | -3827 | 22295 | AN5489 |
| 2708 | CONTIG94 | 360244 | 360518 | 1.12 | 1.25E-01 | transcription_start_site | - | 359641 | 359641 | -740  | 22296 | AN5490 |
| 2708 | CONTIG94 | 360244 | 360518 | 1.12 | 1.25E-01 | transcription_start_site | - | 359086 | 359086 | -1295 | 22297 | AN5490 |
| 2708 | CONTIG94 | 360244 | 360518 | 1.12 | 1.25E-01 | transcription_start_site | - | 358952 | 358952 | -1429 | 22298 | AN5490 |
| 495  | CONTIG94 | 369844 | 370553 | 2.45 | 0.00E+00 | transcription_start_site | - | 367310 | 367310 | -2888 | 22299 | AN5491 |
| 495  | CONTIG94 | 369844 | 370553 | 2.45 | 0.00E+00 | transcription_start_site | - | 367065 | 367065 | -3133 | 22300 | AN5491 |
| 495  | CONTIG94 | 369844 | 370553 | 2.45 | 0.00E+00 | transcription_start_site | - | 369698 | 369698 | -500  | 22302 | AN5492 |
| 495  | CONTIG94 | 369844 | 370553 | 2.45 | 0.00E+00 | transcription_start_site | - | 369517 | 369517 | -681  | 22303 | AN5492 |
| 495  | CONTIG94 | 369844 | 370553 | 2.45 | 0.00E+00 | transcription_start_site | + | 371333 | 371333 | -1134 | 22304 | AN5493 |
| 495  | CONTIG94 | 369844 | 370553 | 2.45 | 0.00E+00 | transcription_start_site | + | 371719 | 371719 | -1520 | 22305 | AN5493 |
| 495  | CONTIG94 | 369844 | 370553 | 2.45 | 0.00E+00 | transcription_start_site | + | 373031 | 373031 | -2832 | 22306 | AN5493 |
| 1615 | CONTIG94 | 391430 | 391709 | 1.53 | 2.62E-02 | transcription_start_site | + | 390892 | 390892 | 677   | 22324 | AN5500 |
| 1615 | CONTIG94 | 391430 | 391709 | 1.53 | 2.62E-02 | transcription_start_site | + | 390797 | 390797 | 772   | 22323 | AN5500 |
| 2913 | CONTIG94 | 389270 | 389604 | 1    | 1.93E-01 | transcription_start_site | + | 390797 | 390797 | -1360 | 22323 | AN5500 |
| 2913 | CONTIG94 | 389270 | 389604 | 1    | 1.93E-01 | transcription_start_site | + | 390892 | 390892 | -1455 | 22324 | AN5500 |
| 1615 | CONTIG94 | 391430 | 391709 | 1.53 | 2.62E-02 | transcription_start_site | + | 392816 | 392816 | -1246 | 22325 | AN5501 |
| 1615 | CONTIG94 | 391430 | 391709 | 1.53 | 2.62E-02 | transcription_start_site | + | 393892 | 393892 | -2322 | 22326 | AN5501 |
| 1615 | CONTIG94 | 391430 | 391709 | 1.53 | 2.62E-02 | transcription_start_site | + | 394063 | 394063 | -2493 | 22327 | AN5501 |
| 1615 | CONTIG94 | 391430 | 391709 | 1.53 | 2.62E-02 | transcription_start_site | + | 394139 | 394139 | -2569 | 22328 | AN5501 |
| 2606 | CONTIG94 | 392570 | 393204 | 1.16 | 8.36E-02 | transcription_start_site | + | 392816 | 392816 | 71    | 22325 | AN5501 |
| 2606 | CONTIG94 | 392570 | 393204 | 1.16 | 8.36E-02 | transcription_start_site | + | 393892 | 393892 | -1005 | 22326 | AN5501 |
| 2606 | CONTIG94 | 392570 | 393204 | 1.16 | 8.36E-02 | transcription_start_site | + | 394063 | 394063 | -1176 | 22327 | AN5501 |
| 2606 | CONTIG94 | 392570 | 393204 | 1.16 | 8.36E-02 | transcription_start_site | + | 394139 | 394139 | -1252 | 22328 | AN5501 |
| 2913 | CONTIG94 | 389270 | 389604 | 1    | 1.93E-01 | transcription_start_site | + | 392816 | 392816 | -3379 | 22325 | AN5501 |
| 2913 | CONTIG94 | 389270 | 389604 | 1    | 1.93E-01 | transcription_start_site | + | 393892 | 393892 | -4455 | 22326 | AN5501 |
| 2913 | CONTIG94 | 389270 | 389604 | 1    | 1.93E-01 | transcription_start_site | + | 394063 | 394063 | -4626 | 22327 | AN5501 |
| 2913 | CONTIG94 | 389270 | 389604 | 1    | 1.93E-01 | transcription_start_site | + | 394139 | 394139 | -4702 | 22328 | AN5501 |
| 1615 | CONTIG94 | 391430 | 391709 | 1.53 | 2.62E-02 | transcription_start_site | + | 395820 | 395820 | -4250 | 22329 | AN5502 |
| 1615 | CONTIG94 | 391430 | 391709 | 1.53 | 2.62E-02 | transcription_start_site | + | 396540 | 396540 | -4970 | 22330 | AN5502 |
| 2606 | CONTIG94 | 392570 | 393204 | 1.16 | 8.36E-02 | transcription_start_site | + | 395820 | 395820 | -2933 | 22329 | AN5502 |
| 2606 | CONTIG94 | 392570 | 393204 | 1.16 | 8.36E-02 | transcription_start_site | + | 396540 | 396540 | -3653 | 22330 | AN5502 |
| 2606 | CONTIG94 | 392570 | 393204 | 1.16 | 8.36E-02 | transcription_start_site | + | 396936 | 396936 | -4049 | 22331 | AN5502 |

|      |          |        |        |      |          |                          |   |        |        |       |       |        |
|------|----------|--------|--------|------|----------|--------------------------|---|--------|--------|-------|-------|--------|
| 2606 | CONTIG94 | 392570 | 393204 | 1.16 | 8.36E-02 | transcription_start_site | + | 397245 | 397245 | -4358 | 22332 | AN5502 |
| 2606 | CONTIG94 | 392570 | 393204 | 1.16 | 8.36E-02 | transcription_start_site | + | 397932 | 397932 | -5045 | 22333 | AN5503 |
| 2606 | CONTIG94 | 392570 | 393204 | 1.16 | 8.36E-02 | transcription_start_site | + | 397973 | 397973 | -5086 | 22334 | AN5503 |
| 2606 | CONTIG94 | 392570 | 393204 | 1.16 | 8.36E-02 | transcription_start_site | + | 398183 | 398183 | -5296 | 22335 | AN5503 |
| 2373 | CONTIG94 | 422102 | 422766 | 1.24 | 8.01E-02 | transcription_start_site | + | 423794 | 423794 | -1360 | 22361 | AN5510 |
| 933  | CONTIG94 | 442968 | 443467 | 1.97 | 3.61E-03 | transcription_start_site | - | 438576 | 438576 | -4641 | 22371 | AN5514 |
| 933  | CONTIG94 | 442968 | 443467 | 1.97 | 3.61E-03 | transcription_start_site | - | 438216 | 438216 | -5001 | 22372 | AN5514 |
| 933  | CONTIG94 | 442968 | 443467 | 1.97 | 3.61E-03 | transcription_start_site | - | 437998 | 437998 | -5219 | 22373 | AN5514 |
| 1516 | CONTIG94 | 441678 | 441958 | 1.57 | 2.12E-02 | transcription_start_site | - | 438576 | 438576 | -3242 | 22371 | AN5514 |
| 1516 | CONTIG94 | 441678 | 441958 | 1.57 | 2.12E-02 | transcription_start_site | - | 438216 | 438216 | -3602 | 22372 | AN5514 |
| 1516 | CONTIG94 | 441678 | 441958 | 1.57 | 2.12E-02 | transcription_start_site | - | 437998 | 437998 | -3820 | 22373 | AN5514 |
| 1516 | CONTIG94 | 441678 | 441958 | 1.57 | 2.12E-02 | transcription_start_site | - | 436944 | 436944 | -4874 | 22374 | AN5514 |
| 1516 | CONTIG94 | 441678 | 441958 | 1.57 | 2.12E-02 | transcription_start_site | - | 436713 | 436713 | -5105 | 22375 | AN5514 |
| 2250 | CONTIG94 | 440788 | 441657 | 1.28 | 5.05E-02 | transcription_start_site | - | 438576 | 438576 | -2646 | 22371 | AN5514 |
| 2250 | CONTIG94 | 440788 | 441657 | 1.28 | 5.05E-02 | transcription_start_site | - | 438216 | 438216 | -3006 | 22372 | AN5514 |
| 2250 | CONTIG94 | 440788 | 441657 | 1.28 | 5.05E-02 | transcription_start_site | - | 437998 | 437998 | -3224 | 22373 | AN5514 |
| 2250 | CONTIG94 | 440788 | 441657 | 1.28 | 5.05E-02 | transcription_start_site | - | 436944 | 436944 | -4278 | 22374 | AN5514 |
| 2250 | CONTIG94 | 440788 | 441657 | 1.28 | 5.05E-02 | transcription_start_site | - | 436713 | 436713 | -4509 | 22375 | AN5514 |
| 2250 | CONTIG94 | 440788 | 441657 | 1.28 | 5.05E-02 | transcription_start_site | - | 436533 | 436533 | -4689 | 22376 | AN5514 |
| 2250 | CONTIG94 | 440788 | 441657 | 1.28 | 5.05E-02 | transcription_start_site | - | 435977 | 435977 | -5245 | 22377 | AN5514 |
| 2783 | CONTIG94 | 441993 | 442637 | 1.08 | 1.44E-01 | transcription_start_site | - | 438576 | 438576 | -3739 | 22371 | AN5514 |
| 2783 | CONTIG94 | 441993 | 442637 | 1.08 | 1.44E-01 | transcription_start_site | - | 438216 | 438216 | -4099 | 22372 | AN5514 |
| 2783 | CONTIG94 | 441993 | 442637 | 1.08 | 1.44E-01 | transcription_start_site | - | 437998 | 437998 | -4317 | 22373 | AN5514 |
| 1182 | CONTIG94 | 451808 | 452082 | 1.77 | 8.81E-03 | transcription_start_site | - | 450434 | 450434 | -1511 | 22383 | AN5516 |
| 1182 | CONTIG94 | 451808 | 452082 | 1.77 | 8.81E-03 | transcription_start_site | - | 450163 | 450163 | -1782 | 22384 | AN5516 |
| 1182 | CONTIG94 | 451808 | 452082 | 1.77 | 8.81E-03 | transcription_start_site | - | 450084 | 450084 | -1861 | 22385 | AN5516 |
| 1182 | CONTIG94 | 451808 | 452082 | 1.77 | 8.81E-03 | transcription_start_site | - | 449822 | 449822 | -2123 | 22386 | AN5516 |
| 1182 | CONTIG94 | 451808 | 452082 | 1.77 | 8.81E-03 | transcription_start_site | - | 449494 | 449494 | -2451 | 22387 | AN5516 |
| 1182 | CONTIG94 | 451808 | 452082 | 1.77 | 8.81E-03 | transcription_start_site | - | 449287 | 449287 | -2658 | 22388 | AN5516 |
| 1182 | CONTIG94 | 451808 | 452082 | 1.77 | 8.81E-03 | transcription_start_site | - | 449054 | 449054 | -2891 | 22389 | AN5516 |
| 1182 | CONTIG94 | 451808 | 452082 | 1.77 | 8.81E-03 | transcription_start_site | - | 448931 | 448931 | -3014 | 22390 | AN5516 |
| 1182 | CONTIG94 | 451808 | 452082 | 1.77 | 8.81E-03 | transcription_start_site | - | 448654 | 448654 | -3291 | 22391 | AN5516 |
| 1182 | CONTIG94 | 451808 | 452082 | 1.77 | 8.81E-03 | transcription_start_site | - | 448375 | 448375 | -3570 | 22392 | AN5516 |
| 1182 | CONTIG94 | 451808 | 452082 | 1.77 | 8.81E-03 | transcription_start_site | - | 448134 | 448134 | -3811 | 22393 | AN5516 |
| 1182 | CONTIG94 | 451808 | 452082 | 1.77 | 8.81E-03 | transcription_start_site | + | 452495 | 452495 | -550  | 22394 | AN5517 |
| 1182 | CONTIG94 | 451808 | 452082 | 1.77 | 8.81E-03 | transcription_start_site | + | 452842 | 452842 | -897  | 22395 | AN5517 |
| 1182 | CONTIG94 | 451808 | 452082 | 1.77 | 8.81E-03 | transcription_start_site | + | 455605 | 455605 | -3660 | 22396 | AN5517 |
| 2905 | CONTIG94 | 459088 | 459504 | 1    | 1.79E-01 | transcription_start_site | - | 457537 | 457537 | -1759 | 22397 | AN5518 |
| 2905 | CONTIG94 | 459088 | 459504 | 1    | 1.79E-01 | transcription_start_site | - | 456921 | 456921 | -2375 | 22398 | AN5518 |
| 2905 | CONTIG94 | 459088 | 459504 | 1    | 1.79E-01 | transcription_start_site | + | 459357 | 459357 | -61   | 22403 | AN5520 |
| 2905 | CONTIG94 | 459088 | 459504 | 1    | 1.79E-01 | transcription_start_site | + | 459219 | 459219 | 77    | 22402 | AN5520 |
| 2905 | CONTIG94 | 459088 | 459504 | 1    | 1.79E-01 | transcription_start_site | + | 458948 | 458948 | 348   | 22401 | AN5520 |
| 2905 | CONTIG94 | 459088 | 459504 | 1    | 1.79E-01 | transcription_start_site | + | 459923 | 459923 | -627  | 22404 | AN5520 |
| 1183 | CONTIG94 | 468827 | 469116 | 1.77 | 8.81E-03 | transcription_start_site | - | 463929 | 463929 | -5042 | 22405 | AN5521 |
| 1183 | CONTIG94 | 468827 | 469116 | 1.77 | 8.81E-03 | transcription_start_site | - | 465470 | 465470 | -3501 | 22409 | AN5522 |
| 1183 | CONTIG94 | 468827 | 469116 | 1.77 | 8.81E-03 | transcription_start_site | - | 468355 | 468355 | -616  | 22410 | AN5523 |
| 1183 | CONTIG94 | 468827 | 469116 | 1.77 | 8.81E-03 | transcription_start_site | - | 467988 | 467988 | -983  | 22411 | AN5523 |
| 1183 | CONTIG94 | 468827 | 469116 | 1.77 | 8.81E-03 | transcription_start_site | - | 467560 | 467560 | -1411 | 22412 | AN5523 |
| 1183 | CONTIG94 | 468827 | 469116 | 1.77 | 8.81E-03 | transcription_start_site | - | 467141 | 467141 | -1830 | 22413 | AN5523 |
| 1183 | CONTIG94 | 468827 | 469116 | 1.77 | 8.81E-03 | transcription_start_site | - | 466746 | 466746 | -2225 | 22414 | AN5523 |
| 2038 | CONTIG94 | 471077 | 471366 | 1.36 | 5.22E-02 | transcription_start_site | - | 468355 | 468355 | -2866 | 22410 | AN5523 |
| 2038 | CONTIG94 | 471077 | 471366 | 1.36 | 5.22E-02 | transcription_start_site | - | 467988 | 467988 | -3233 | 22411 | AN5523 |
| 2038 | CONTIG94 | 471077 | 471366 | 1.36 | 5.22E-02 | transcription_start_site | - | 467560 | 467560 | -3661 | 22412 | AN5523 |
| 2038 | CONTIG94 | 471077 | 471366 | 1.36 | 5.22E-02 | transcription_start_site | - | 467141 | 467141 | -4080 | 22413 | AN5523 |
| 2038 | CONTIG94 | 471077 | 471366 | 1.36 | 5.22E-02 | transcription_start_site | - | 466746 | 466746 | -4475 | 22414 | AN5523 |
| 972  | CONTIG94 | 474392 | 474726 | 1.93 | 4.61E-03 | transcription_start_site | - | 470334 | 470334 | -4225 | 22415 | AN5524 |
| 972  | CONTIG94 | 474392 | 474726 | 1.93 | 4.61E-03 | transcription_start_site | - | 470135 | 470135 | -4424 | 22416 | AN5524 |

|      |          |        |        |      |          |                          |   |        |        |       |       |        |
|------|----------|--------|--------|------|----------|--------------------------|---|--------|--------|-------|-------|--------|
| 972  | CONTIG94 | 474392 | 474726 | 1.93 | 4.61E-03 | transcription_start_site | - | 470066 | 470066 | -4493 | 22417 | AN5524 |
| 972  | CONTIG94 | 474392 | 474726 | 1.93 | 4.61E-03 | transcription_start_site | - | 469643 | 469643 | -4916 | 22418 | AN5524 |
| 1183 | CONTIG94 | 468827 | 469116 | 1.77 | 8.81E-03 | transcription_start_site | - | 469643 | 469643 | 671   | 22418 | AN5524 |
| 1183 | CONTIG94 | 468827 | 469116 | 1.77 | 8.81E-03 | transcription_start_site | - | 470066 | 470066 | 1094  | 22417 | AN5524 |
| 2038 | CONTIG94 | 471077 | 471366 | 1.36 | 5.22E-02 | transcription_start_site | - | 470334 | 470334 | -887  | 22415 | AN5524 |
| 2038 | CONTIG94 | 471077 | 471366 | 1.36 | 5.22E-02 | transcription_start_site | - | 470135 | 470135 | -1086 | 22416 | AN5524 |
| 2038 | CONTIG94 | 471077 | 471366 | 1.36 | 5.22E-02 | transcription_start_site | - | 470066 | 470066 | -1155 | 22417 | AN5524 |
| 2038 | CONTIG94 | 471077 | 471366 | 1.36 | 5.22E-02 | transcription_start_site | - | 469643 | 469643 | -1578 | 22418 | AN5524 |
| 972  | CONTIG94 | 474392 | 474726 | 1.93 | 4.61E-03 | transcription_start_site | - | 473810 | 473810 | -749  | 22419 | AN5525 |
| 972  | CONTIG94 | 474392 | 474726 | 1.93 | 4.61E-03 | transcription_start_site | - | 473646 | 473646 | -913  | 22420 | AN5525 |
| 972  | CONTIG94 | 474392 | 474726 | 1.93 | 4.61E-03 | transcription_start_site | - | 473554 | 473554 | -1005 | 22421 | AN5525 |
| 972  | CONTIG94 | 474392 | 474726 | 1.93 | 4.61E-03 | transcription_start_site | - | 473385 | 473385 | -1174 | 22422 | AN5525 |
| 972  | CONTIG94 | 474392 | 474726 | 1.93 | 4.61E-03 | transcription_start_site | - | 473275 | 473275 | -1284 | 22423 | AN5525 |
| 972  | CONTIG94 | 474392 | 474726 | 1.93 | 4.61E-03 | transcription_start_site | - | 472612 | 472612 | -1947 | 22424 | AN5525 |
| 972  | CONTIG94 | 474392 | 474726 | 1.93 | 4.61E-03 | transcription_start_site | - | 471207 | 471207 | -3352 | 22425 | AN5525 |
| 2038 | CONTIG94 | 471077 | 471366 | 1.36 | 5.22E-02 | transcription_start_site | - | 471207 | 471207 | -14   | 22425 | AN5525 |
| 972  | CONTIG94 | 474392 | 474726 | 1.93 | 4.61E-03 | transcription_start_site | + | 475023 | 475023 | -464  | 22426 | AN5526 |
| 972  | CONTIG94 | 474392 | 474726 | 1.93 | 4.61E-03 | transcription_start_site | + | 475129 | 475129 | -570  | 22427 | AN5526 |
| 972  | CONTIG94 | 474392 | 474726 | 1.93 | 4.61E-03 | transcription_start_site | + | 475377 | 475377 | -818  | 22428 | AN5526 |
| 2038 | CONTIG94 | 471077 | 471366 | 1.36 | 5.22E-02 | transcription_start_site | + | 475023 | 475023 | -3801 | 22426 | AN5526 |
| 2038 | CONTIG94 | 471077 | 471366 | 1.36 | 5.22E-02 | transcription_start_site | + | 475129 | 475129 | -3907 | 22427 | AN5526 |
| 2038 | CONTIG94 | 471077 | 471366 | 1.36 | 5.22E-02 | transcription_start_site | + | 475377 | 475377 | -4155 | 22428 | AN5526 |
| 810  | CONTIG94 | 491253 | 491542 | 2.09 | 1.80E-03 | transcription_start_site | - | 488710 | 488710 | -2687 | 22429 | AN5528 |
| 810  | CONTIG94 | 491253 | 491542 | 2.09 | 1.80E-03 | transcription_start_site | - | 488288 | 488288 | -3109 | 22430 | AN5528 |
| 810  | CONTIG94 | 491253 | 491542 | 2.09 | 1.80E-03 | transcription_start_site | - | 488171 | 488171 | -3226 | 22431 | AN5528 |
| 810  | CONTIG94 | 491253 | 491542 | 2.09 | 1.80E-03 | transcription_start_site | - | 488003 | 488003 | -3394 | 22432 | AN5528 |
| 810  | CONTIG94 | 491253 | 491542 | 2.09 | 1.80E-03 | transcription_start_site | - | 487682 | 487682 | -3715 | 22433 | AN5528 |
| 810  | CONTIG94 | 491253 | 491542 | 2.09 | 1.80E-03 | transcription_start_site | - | 486564 | 486564 | -4833 | 22434 | AN5528 |
| 810  | CONTIG94 | 491253 | 491542 | 2.09 | 1.80E-03 | transcription_start_site | - | 486284 | 486284 | -5113 | 22435 | AN5528 |
| 810  | CONTIG94 | 491253 | 491542 | 2.09 | 1.80E-03 | transcription_start_site | + | 491499 | 491499 | -101  | 22436 | AN5529 |
| 810  | CONTIG94 | 491253 | 491542 | 2.09 | 1.80E-03 | transcription_start_site | + | 492042 | 492042 | -644  | 22437 | AN5529 |
| 810  | CONTIG94 | 491253 | 491542 | 2.09 | 1.80E-03 | transcription_start_site | + | 492608 | 492608 | -1210 | 22438 | AN5529 |
| 810  | CONTIG94 | 491253 | 491542 | 2.09 | 1.80E-03 | transcription_start_site | + | 493135 | 493135 | -1737 | 22439 | AN5529 |
| 810  | CONTIG94 | 491253 | 491542 | 2.09 | 1.80E-03 | transcription_start_site | + | 495001 | 495001 | -3603 | 22442 | AN5531 |
| 810  | CONTIG94 | 491253 | 491542 | 2.09 | 1.80E-03 | transcription_start_site | + | 495274 | 495274 | -3876 | 22443 | AN5531 |
| 810  | CONTIG94 | 491253 | 491542 | 2.09 | 1.80E-03 | transcription_start_site | + | 495771 | 495771 | -4373 | 22444 | AN5531 |
| 810  | CONTIG94 | 491253 | 491542 | 2.09 | 1.80E-03 | transcription_start_site | + | 495908 | 495908 | -4510 | 22445 | AN5531 |
| 1808 | CONTIG95 | 12901  | 14525  | 1.45 | 5.02E-02 | transcription_start_site | - | 8433   | 8433   | -5280 | 22468 | AN5542 |
| 1808 | CONTIG95 | 12901  | 14525  | 1.45 | 5.02E-02 | transcription_start_site | - | 7989   | 7989   | -5724 | 22469 | AN5542 |
| 1808 | CONTIG95 | 12901  | 14525  | 1.45 | 5.02E-02 | transcription_start_site | - | 10696  | 10696  | -3017 | 22475 | AN5544 |
| 456  | CONTIG95 | 18686  | 19325  | 2.51 | 1.80E-03 | transcription_start_site | - | 16373  | 16373  | -2632 | 22477 | AN5546 |
| 456  | CONTIG95 | 18686  | 19325  | 2.51 | 1.80E-03 | transcription_start_site | - | 15005  | 15005  | -4000 | 22478 | AN5546 |
| 456  | CONTIG95 | 18686  | 19325  | 2.51 | 1.80E-03 | transcription_start_site | - | 14724  | 14724  | -4281 | 22479 | AN5546 |
| 1808 | CONTIG95 | 12901  | 14525  | 1.45 | 5.02E-02 | transcription_start_site | - | 14724  | 14724  | 1011  | 22479 | AN5546 |
| 1808 | CONTIG95 | 12901  | 14525  | 1.45 | 5.02E-02 | transcription_start_site | - | 15005  | 15005  | 1292  | 22478 | AN5546 |
| 456  | CONTIG95 | 18686  | 19325  | 2.51 | 1.80E-03 | transcription_start_site | - | 18630  | 18630  | -375  | 22480 | AN5547 |
| 456  | CONTIG95 | 18686  | 19325  | 2.51 | 1.80E-03 | transcription_start_site | - | 18349  | 18349  | -656  | 22481 | AN5547 |
| 456  | CONTIG95 | 18686  | 19325  | 2.51 | 1.80E-03 | transcription_start_site | - | 18190  | 18190  | -815  | 22482 | AN5547 |
| 456  | CONTIG95 | 18686  | 19325  | 2.51 | 1.80E-03 | transcription_start_site | - | 18011  | 18011  | -994  | 22483 | AN5547 |
| 456  | CONTIG95 | 18686  | 19325  | 2.51 | 1.80E-03 | transcription_start_site | - | 17377  | 17377  | -1628 | 22484 | AN5547 |
| 2173 | CONTIG95 | 40818  | 41152  | 1.31 | 1.44E-01 | transcription_start_site | - | 40907  | 40907  | -78   | 22496 | AN5553 |
| 2173 | CONTIG95 | 40818  | 41152  | 1.31 | 1.44E-01 | transcription_start_site | - | 40270  | 40270  | -715  | 22497 | AN5553 |
| 2173 | CONTIG95 | 40818  | 41152  | 1.31 | 1.44E-01 | transcription_start_site | - | 39612  | 39612  | -1373 | 22498 | AN5553 |
| 83   | CONTIG95 | 72246  | 72505  | 3.29 | 0.00E+00 | transcription_start_site | - | 71963  | 71963  | -412  | 22516 | AN5563 |
| 83   | CONTIG95 | 72246  | 72505  | 3.29 | 0.00E+00 | transcription_start_site | - | 71497  | 71497  | -878  | 22517 | AN5563 |
| 335  | CONTIG95 | 74866  | 75290  | 2.71 | 9.51E-04 | transcription_start_site | - | 71963  | 71963  | -3115 | 22516 | AN5563 |
| 335  | CONTIG95 | 74866  | 75290  | 2.71 | 9.51E-04 | transcription_start_site | - | 71497  | 71497  | -3581 | 22517 | AN5563 |

|      |          |       |       |      |          |                          |   |       |       |       |       |        |
|------|----------|-------|-------|------|----------|--------------------------|---|-------|-------|-------|-------|--------|
| 1380 | CONTIG95 | 70066 | 71600 | 1.64 | 3.08E-02 | transcription_start_site | - | 71497 | 71497 | 664   | 22517 | AN5563 |
| 1380 | CONTIG95 | 70066 | 71600 | 1.64 | 3.08E-02 | transcription_start_site | - | 71963 | 71963 | 1130  | 22516 | AN5563 |
| 1928 | CONTIG95 | 73956 | 74680 | 1.4  | 9.26E-02 | transcription_start_site | - | 71963 | 71963 | -2355 | 22516 | AN5563 |
| 1928 | CONTIG95 | 73956 | 74680 | 1.4  | 9.26E-02 | transcription_start_site | - | 71497 | 71497 | -2821 | 22517 | AN5563 |
| 83   | CONTIG95 | 72246 | 72505 | 3.29 | 0.00E+00 | transcription_start_site | + | 73248 | 73248 | -872  | 22518 | AN5564 |
| 1380 | CONTIG95 | 70066 | 71600 | 1.64 | 3.08E-02 | transcription_start_site | + | 73248 | 73248 | -2415 | 22518 | AN5564 |
| 1928 | CONTIG95 | 73956 | 74680 | 1.4  | 9.26E-02 | transcription_start_site | + | 73248 | 73248 | 1070  | 22518 | AN5564 |
| 83   | CONTIG95 | 72246 | 72505 | 3.29 | 0.00E+00 | transcription_start_site | + | 76227 | 76227 | -3851 | 22519 | AN5565 |
| 83   | CONTIG95 | 72246 | 72505 | 3.29 | 0.00E+00 | transcription_start_site | + | 76329 | 76329 | -3953 | 22520 | AN5565 |
| 335  | CONTIG95 | 74866 | 75290 | 2.71 | 9.51E-04 | transcription_start_site | + | 76227 | 76227 | -1149 | 22519 | AN5565 |
| 335  | CONTIG95 | 74866 | 75290 | 2.71 | 9.51E-04 | transcription_start_site | + | 76329 | 76329 | -1251 | 22520 | AN5565 |
| 1380 | CONTIG95 | 70066 | 71600 | 1.64 | 3.08E-02 | transcription_start_site | + | 76227 | 76227 | -5394 | 22519 | AN5565 |
| 1380 | CONTIG95 | 70066 | 71600 | 1.64 | 3.08E-02 | transcription_start_site | + | 76329 | 76329 | -5496 | 22520 | AN5565 |
| 1928 | CONTIG95 | 73956 | 74680 | 1.4  | 9.26E-02 | transcription_start_site | + | 76227 | 76227 | -1909 | 22519 | AN5565 |
| 1928 | CONTIG95 | 73956 | 74680 | 1.4  | 9.26E-02 | transcription_start_site | + | 76329 | 76329 | -2011 | 22520 | AN5565 |
| 335  | CONTIG95 | 74866 | 75290 | 2.71 | 9.51E-04 | transcription_start_site | + | 79641 | 79641 | -4563 | 22521 | AN5566 |
| 335  | CONTIG95 | 74866 | 75290 | 2.71 | 9.51E-04 | transcription_start_site | + | 79758 | 79758 | -4680 | 22522 | AN5566 |
| 1928 | CONTIG95 | 73956 | 74680 | 1.4  | 9.26E-02 | transcription_start_site | + | 79641 | 79641 | -5323 | 22521 | AN5566 |
| 299  | CONTIG95 | 85518 | 86109 | 2.76 | 0.00E+00 | transcription_start_site | + | 87440 | 87440 | -1626 | 22527 | AN5568 |
| 299  | CONTIG95 | 85518 | 86109 | 2.76 | 0.00E+00 | transcription_start_site | + | 87739 | 87739 | -1925 | 22528 | AN5568 |
| 299  | CONTIG95 | 85518 | 86109 | 2.76 | 0.00E+00 | transcription_start_site | + | 88115 | 88115 | -2301 | 22529 | AN5568 |
| 299  | CONTIG95 | 85518 | 86109 | 2.76 | 0.00E+00 | transcription_start_site | + | 90143 | 90143 | -4329 | 22530 | AN5569 |
| 299  | CONTIG95 | 85518 | 86109 | 2.76 | 0.00E+00 | transcription_start_site | + | 90337 | 90337 | -4523 | 22531 | AN5569 |
| 819  | CONTIG96 | 7971  | 8320  | 2.08 | 2.12E-02 | transcription_start_site | - | 4471  | 4471  | -3674 | 22545 | AN5573 |
| 942  | CONTIG96 | 4731  | 5155  | 1.97 | 3.08E-02 | transcription_start_site | - | 4471  | 4471  | -472  | 22545 | AN5573 |
| 819  | CONTIG96 | 7971  | 8320  | 2.08 | 2.12E-02 | transcription_start_site | + | 7329  | 7329  | 816   | 22549 | AN5574 |
| 819  | CONTIG96 | 7971  | 8320  | 2.08 | 2.12E-02 | transcription_start_site | + | 7004  | 7004  | 1141  | 22548 | AN5574 |
| 942  | CONTIG96 | 4731  | 5155  | 1.97 | 3.08E-02 | transcription_start_site | + | 6566  | 6566  | -1623 | 22546 | AN5574 |
| 942  | CONTIG96 | 4731  | 5155  | 1.97 | 3.08E-02 | transcription_start_site | + | 6674  | 6674  | -1731 | 22547 | AN5574 |
| 942  | CONTIG96 | 4731  | 5155  | 1.97 | 3.08E-02 | transcription_start_site | + | 7004  | 7004  | -2061 | 22548 | AN5574 |
| 942  | CONTIG96 | 4731  | 5155  | 1.97 | 3.08E-02 | transcription_start_site | + | 7329  | 7329  | -2386 | 22549 | AN5574 |
| 819  | CONTIG96 | 7971  | 8320  | 2.08 | 2.12E-02 | transcription_start_site | + | 9581  | 9581  | -1435 | 22550 | AN5575 |
| 819  | CONTIG96 | 7971  | 8320  | 2.08 | 2.12E-02 | transcription_start_site | + | 9667  | 9667  | -1521 | 22551 | AN5575 |
| 819  | CONTIG96 | 7971  | 8320  | 2.08 | 2.12E-02 | transcription_start_site | + | 9820  | 9820  | -1674 | 22552 | AN5575 |
| 942  | CONTIG96 | 4731  | 5155  | 1.97 | 3.08E-02 | transcription_start_site | + | 9581  | 9581  | -4638 | 22550 | AN5575 |
| 942  | CONTIG96 | 4731  | 5155  | 1.97 | 3.08E-02 | transcription_start_site | + | 9667  | 9667  | -4724 | 22551 | AN5575 |
| 942  | CONTIG96 | 4731  | 5155  | 1.97 | 3.08E-02 | transcription_start_site | + | 9820  | 9820  | -4877 | 22552 | AN5575 |
| 713  | CONTIG96 | 14420 | 14684 | 2.19 | 1.57E-02 | transcription_start_site | - | 14903 | 14903 | 351   | 22554 | AN5576 |
| 713  | CONTIG96 | 14420 | 14684 | 2.19 | 1.57E-02 | transcription_start_site | - | 15257 | 15257 | 705   | 22553 | AN5576 |
| 938  | CONTIG96 | 15245 | 15804 | 1.97 | 1.20E-02 | transcription_start_site | - | 15257 | 15257 | -267  | 22553 | AN5576 |
| 938  | CONTIG96 | 15245 | 15804 | 1.97 | 1.20E-02 | transcription_start_site | - | 14903 | 14903 | -621  | 22554 | AN5576 |
| 938  | CONTIG96 | 15245 | 15804 | 1.97 | 1.20E-02 | transcription_start_site | - | 15857 | 15857 | 332   | 22558 | AN5577 |
| 938  | CONTIG96 | 15245 | 15804 | 1.97 | 1.20E-02 | transcription_start_site | - | 15976 | 15976 | 451   | 22557 | AN5577 |
| 938  | CONTIG96 | 15245 | 15804 | 1.97 | 1.20E-02 | transcription_start_site | - | 16447 | 16447 | 922   | 22556 | AN5577 |
| 938  | CONTIG96 | 15245 | 15804 | 1.97 | 1.20E-02 | transcription_start_site | - | 16620 | 16620 | 1095  | 22555 | AN5577 |
| 713  | CONTIG96 | 14420 | 14684 | 2.19 | 1.57E-02 | transcription_start_site | + | 16871 | 16871 | -2319 | 22559 | AN5578 |
| 938  | CONTIG96 | 15245 | 15804 | 1.97 | 1.20E-02 | transcription_start_site | + | 16871 | 16871 | -1346 | 22559 | AN5578 |
| 943  | CONTIG96 | 11710 | 11979 | 1.97 | 3.08E-02 | transcription_start_site | + | 16871 | 16871 | -5026 | 22559 | AN5578 |
| 768  | CONTIG96 | 32255 | 33439 | 2.13 | 1.84E-02 | transcription_start_site | - | 29618 | 29618 | -3229 | 22560 | AN5579 |
| 874  | CONTIG96 | 30315 | 30729 | 2.03 | 2.62E-02 | transcription_start_site | - | 29618 | 29618 | -904  | 22560 | AN5579 |
| 768  | CONTIG96 | 32255 | 33439 | 2.13 | 1.84E-02 | transcription_start_site | + | 31338 | 31338 | 1509  | 22567 | AN5580 |
| 874  | CONTIG96 | 30315 | 30729 | 2.03 | 2.62E-02 | transcription_start_site | + | 30598 | 30598 | -76   | 22564 | AN5580 |
| 874  | CONTIG96 | 30315 | 30729 | 2.03 | 2.62E-02 | transcription_start_site | + | 30896 | 30896 | -374  | 22565 | AN5580 |
| 874  | CONTIG96 | 30315 | 30729 | 2.03 | 2.62E-02 | transcription_start_site | + | 31044 | 31044 | -522  | 22566 | AN5580 |
| 874  | CONTIG96 | 30315 | 30729 | 2.03 | 2.62E-02 | transcription_start_site | + | 31338 | 31338 | -816  | 22567 | AN5580 |
| 768  | CONTIG96 | 32255 | 33439 | 2.13 | 1.84E-02 | transcription_start_site | + | 32961 | 32961 | -114  | 22569 | AN5581 |
| 768  | CONTIG96 | 32255 | 33439 | 2.13 | 1.84E-02 | transcription_start_site | + | 32473 | 32473 | 374   | 22568 | AN5581 |

|               |       |       |      |          |                          |   |       |       |       |       |        |
|---------------|-------|-------|------|----------|--------------------------|---|-------|-------|-------|-------|--------|
| 874 CONTIG96  | 30315 | 30729 | 2.03 | 2.62E-02 | transcription_start_site | + | 32473 | 32473 | -1951 | 22568 | AN5581 |
| 874 CONTIG96  | 30315 | 30729 | 2.03 | 2.62E-02 | transcription_start_site | + | 32961 | 32961 | -2439 | 22569 | AN5581 |
| 330 CONTIG96  | 36621 | 37030 | 2.72 | 2.22E-03 | transcription_start_site | + | 36974 | 36974 | -148  | 22574 | AN5582 |
| 330 CONTIG96  | 36621 | 37030 | 2.72 | 2.22E-03 | transcription_start_site | + | 36561 | 36561 | 264   | 22573 | AN5582 |
| 330 CONTIG96  | 36621 | 37030 | 2.72 | 2.22E-03 | transcription_start_site | + | 36481 | 36481 | 344   | 22572 | AN5582 |
| 330 CONTIG96  | 36621 | 37030 | 2.72 | 2.22E-03 | transcription_start_site | + | 35951 | 35951 | 874   | 22571 | AN5582 |
| 330 CONTIG96  | 36621 | 37030 | 2.72 | 2.22E-03 | transcription_start_site | + | 35624 | 35624 | 1201  | 22570 | AN5582 |
| 768 CONTIG96  | 32255 | 33439 | 2.13 | 1.84E-02 | transcription_start_site | + | 35624 | 35624 | -2777 | 22570 | AN5582 |
| 768 CONTIG96  | 32255 | 33439 | 2.13 | 1.84E-02 | transcription_start_site | + | 35951 | 35951 | -3104 | 22571 | AN5582 |
| 768 CONTIG96  | 32255 | 33439 | 2.13 | 1.84E-02 | transcription_start_site | + | 36481 | 36481 | -3634 | 22572 | AN5582 |
| 768 CONTIG96  | 32255 | 33439 | 2.13 | 1.84E-02 | transcription_start_site | + | 36561 | 36561 | -3714 | 22573 | AN5582 |
| 768 CONTIG96  | 32255 | 33439 | 2.13 | 1.84E-02 | transcription_start_site | + | 36974 | 36974 | -4127 | 22574 | AN5582 |
| 874 CONTIG96  | 30315 | 30729 | 2.03 | 2.62E-02 | transcription_start_site | + | 35624 | 35624 | -5102 | 22570 | AN5582 |
| 358 CONTIG96  | 42313 | 42657 | 2.67 | 3.03E-03 | transcription_start_site | - | 41205 | 41205 | -1280 | 22575 | AN5583 |
| 358 CONTIG96  | 42313 | 42657 | 2.67 | 3.03E-03 | transcription_start_site | - | 41097 | 41097 | -1388 | 22576 | AN5583 |
| 358 CONTIG96  | 42313 | 42657 | 2.67 | 3.03E-03 | transcription_start_site | - | 40850 | 40850 | -1635 | 22577 | AN5583 |
| 358 CONTIG96  | 42313 | 42657 | 2.67 | 3.03E-03 | transcription_start_site | - | 40719 | 40719 | -1766 | 22578 | AN5583 |
| 820 CONTIG96  | 39906 | 40250 | 2.08 | 2.12E-02 | transcription_start_site | - | 40719 | 40719 | 641   | 22578 | AN5583 |
| 820 CONTIG96  | 39906 | 40250 | 2.08 | 2.12E-02 | transcription_start_site | - | 40850 | 40850 | 772   | 22577 | AN5583 |
| 820 CONTIG96  | 39906 | 40250 | 2.08 | 2.12E-02 | transcription_start_site | - | 41097 | 41097 | 1019  | 22576 | AN5583 |
| 820 CONTIG96  | 39906 | 40250 | 2.08 | 2.12E-02 | transcription_start_site | - | 41205 | 41205 | 1127  | 22575 | AN5583 |
| 1277 CONTIG96 | 41271 | 42284 | 1.71 | 3.41E-02 | transcription_start_site | - | 41205 | 41205 | -572  | 22575 | AN5583 |
| 1277 CONTIG96 | 41271 | 42284 | 1.71 | 3.41E-02 | transcription_start_site | - | 41097 | 41097 | -680  | 22576 | AN5583 |
| 1277 CONTIG96 | 41271 | 42284 | 1.71 | 3.41E-02 | transcription_start_site | - | 40850 | 40850 | -927  | 22577 | AN5583 |
| 1277 CONTIG96 | 41271 | 42284 | 1.71 | 3.41E-02 | transcription_start_site | - | 40719 | 40719 | -1058 | 22578 | AN5583 |
| 1485 CONTIG96 | 43221 | 43475 | 1.6  | 9.24E-02 | transcription_start_site | - | 41205 | 41205 | -2143 | 22575 | AN5583 |
| 1485 CONTIG96 | 43221 | 43475 | 1.6  | 9.24E-02 | transcription_start_site | - | 41097 | 41097 | -2251 | 22576 | AN5583 |
| 1485 CONTIG96 | 43221 | 43475 | 1.6  | 9.24E-02 | transcription_start_site | - | 40850 | 40850 | -2498 | 22577 | AN5583 |
| 1485 CONTIG96 | 43221 | 43475 | 1.6  | 9.24E-02 | transcription_start_site | - | 40719 | 40719 | -2629 | 22578 | AN5583 |
| 426 CONTIG96  | 59345 | 59619 | 2.56 | 4.61E-03 | transcription_start_site | - | 54698 | 54698 | -4784 | 22590 | AN5587 |
| 426 CONTIG96  | 59345 | 59619 | 2.56 | 4.61E-03 | transcription_start_site | + | 59878 | 59878 | -396  | 22596 | AN5589 |
| 426 CONTIG96  | 59345 | 59619 | 2.56 | 4.61E-03 | transcription_start_site | + | 60218 | 60218 | -736  | 22597 | AN5589 |
| 426 CONTIG96  | 59345 | 59619 | 2.56 | 4.61E-03 | transcription_start_site | + | 61261 | 61261 | -1779 | 22598 | AN5589 |
| 426 CONTIG96  | 59345 | 59619 | 2.56 | 4.61E-03 | transcription_start_site | + | 61490 | 61490 | -2008 | 22599 | AN5589 |
| 1965 CONTIG96 | 63320 | 63669 | 1.39 | 1.50E-01 | transcription_start_site | - | 64024 | 64024 | 529   | 22600 | AN5590 |
| 1845 CONTIG96 | 74195 | 74459 | 1.44 | 1.44E-01 | transcription_start_site | - | 70070 | 70070 | -4257 | 22604 | AN5592 |
| 527 CONTIG97  | 9691  | 10495 | 2.41 | 1.22E-03 | transcription_start_site | - | 6427  | 6427  | -3666 | 22639 | AN5603 |
| 527 CONTIG97  | 9691  | 10495 | 2.41 | 1.22E-03 | transcription_start_site | - | 6334  | 6334  | -3759 | 22640 | AN5603 |
| 527 CONTIG97  | 9691  | 10495 | 2.41 | 1.22E-03 | transcription_start_site | - | 6281  | 6281  | -3812 | 22641 | AN5603 |
| 527 CONTIG97  | 9691  | 10495 | 2.41 | 1.22E-03 | transcription_start_site | - | 9467  | 9467  | -626  | 22642 | AN5604 |
| 527 CONTIG97  | 9691  | 10495 | 2.41 | 1.22E-03 | transcription_start_site | - | 9282  | 9282  | -811  | 22643 | AN5604 |
| 2450 CONTIG98 | 10060 | 10944 | 1.22 | 1.53E-01 | transcription_start_site | + | 10826 | 10826 | -324  | 22657 | AN5610 |
| 2450 CONTIG98 | 10060 | 10944 | 1.22 | 1.53E-01 | transcription_start_site | + | 11218 | 11218 | -716  | 22658 | AN5610 |
| 2450 CONTIG98 | 10060 | 10944 | 1.22 | 1.53E-01 | transcription_start_site | + | 12869 | 12869 | -2367 | 22659 | AN5611 |
| 2450 CONTIG98 | 10060 | 10944 | 1.22 | 1.53E-01 | transcription_start_site | + | 13235 | 13235 | -2733 | 22660 | AN5611 |
| 2455 CONTIG98 | 22580 | 22854 | 1.22 | 1.93E-01 | transcription_start_site | + | 26209 | 26209 | -3492 | 22667 | AN5615 |
| 2455 CONTIG98 | 22580 | 22854 | 1.22 | 1.93E-01 | transcription_start_site | + | 26750 | 26750 | -4033 | 22668 | AN5615 |
| 2455 CONTIG98 | 22580 | 22854 | 1.22 | 1.93E-01 | transcription_start_site | + | 27638 | 27638 | -4921 | 22669 | AN5615 |
| 2455 CONTIG98 | 22580 | 22854 | 1.22 | 1.93E-01 | transcription_start_site | + | 27834 | 27834 | -5117 | 22670 | AN5615 |
| 1082 CONTIG98 | 46221 | 46475 | 1.85 | 2.62E-02 | transcription_start_site | - | 44977 | 44977 | -1371 | 22685 | AN5621 |
| 2456 CONTIG98 | 50701 | 51210 | 1.22 | 1.93E-01 | transcription_start_site | - | 47646 | 47646 | -3309 | 22686 | AN5622 |
| 1082 CONTIG98 | 46221 | 46475 | 1.85 | 2.62E-02 | transcription_start_site | + | 48275 | 48275 | -1927 | 22687 | AN5623 |
| 5 CONTIG98    | 59417 | 59837 | 3.85 | 0.00E+00 | transcription_start_site | - | 54423 | 54423 | -5204 | 22688 | AN5624 |
| 1467 CONTIG98 | 56183 | 56462 | 1.61 | 5.88E-02 | transcription_start_site | - | 54423 | 54423 | -1899 | 22688 | AN5624 |
| 1467 CONTIG98 | 56183 | 56462 | 1.61 | 5.88E-02 | transcription_start_site | - | 54061 | 54061 | -2261 | 22689 | AN5624 |
| 1467 CONTIG98 | 56183 | 56462 | 1.61 | 5.88E-02 | transcription_start_site | - | 53971 | 53971 | -2351 | 22690 | AN5624 |
| 1467 CONTIG98 | 56183 | 56462 | 1.61 | 5.88E-02 | transcription_start_site | - | 53545 | 53545 | -2777 | 22691 | AN5624 |

|               |        |        |      |          |                          |   |        |        |       |       |        |
|---------------|--------|--------|------|----------|--------------------------|---|--------|--------|-------|-------|--------|
| 1467 CONTIG98 | 56183  | 56462  | 1.61 | 5.88E-02 | transcription_start_site | - | 52011  | 52011  | -4311 | 22692 | AN5624 |
| 1677 CONTIG98 | 54688  | 55117  | 1.51 | 8.01E-02 | transcription_start_site | - | 54423  | 54423  | -479  | 22688 | AN5624 |
| 1677 CONTIG98 | 54688  | 55117  | 1.51 | 8.01E-02 | transcription_start_site | - | 54061  | 54061  | -841  | 22689 | AN5624 |
| 1677 CONTIG98 | 54688  | 55117  | 1.51 | 8.01E-02 | transcription_start_site | - | 53971  | 53971  | -931  | 22690 | AN5624 |
| 1677 CONTIG98 | 54688  | 55117  | 1.51 | 8.01E-02 | transcription_start_site | - | 53545  | 53545  | -1357 | 22691 | AN5624 |
| 1677 CONTIG98 | 54688  | 55117  | 1.51 | 8.01E-02 | transcription_start_site | - | 52011  | 52011  | -2891 | 22692 | AN5624 |
| 2456 CONTIG98 | 50701  | 51210  | 1.22 | 1.93E-01 | transcription_start_site | - | 52011  | 52011  | 1055  | 22692 | AN5624 |
| 1467 CONTIG98 | 56183  | 56462  | 1.61 | 5.88E-02 | transcription_start_site | + | 56288  | 56288  | 34    | 22694 | AN5625 |
| 1467 CONTIG98 | 56183  | 56462  | 1.61 | 5.88E-02 | transcription_start_site | + | 56052  | 56052  | 270   | 22693 | AN5625 |
| 1677 CONTIG98 | 54688  | 55117  | 1.51 | 8.01E-02 | transcription_start_site | + | 56052  | 56052  | -1149 | 22693 | AN5625 |
| 1677 CONTIG98 | 54688  | 55117  | 1.51 | 8.01E-02 | transcription_start_site | + | 56288  | 56288  | -1385 | 22694 | AN5625 |
| 2456 CONTIG98 | 50701  | 51210  | 1.22 | 1.93E-01 | transcription_start_site | + | 56052  | 56052  | -5096 | 22693 | AN5625 |
| 5 CONTIG98    | 59417  | 59837  | 3.85 | 0.00E+00 | transcription_start_site | + | 60217  | 60217  | -590  | 22695 | AN5626 |
| 5 CONTIG98    | 59417  | 59837  | 3.85 | 0.00E+00 | transcription_start_site | + | 60320  | 60320  | -693  | 22696 | AN5626 |
| 5 CONTIG98    | 59417  | 59837  | 3.85 | 0.00E+00 | transcription_start_site | + | 61627  | 61627  | -2000 | 22697 | AN5626 |
| 5 CONTIG98    | 59417  | 59837  | 3.85 | 0.00E+00 | transcription_start_site | + | 61944  | 61944  | -2317 | 22698 | AN5626 |
| 5 CONTIG98    | 59417  | 59837  | 3.85 | 0.00E+00 | transcription_start_site | + | 62123  | 62123  | -2496 | 22699 | AN5626 |
| 5 CONTIG98    | 59417  | 59837  | 3.85 | 0.00E+00 | transcription_start_site | + | 62452  | 62452  | -2825 | 22700 | AN5626 |
| 1137 CONTIG98 | 62327  | 63291  | 1.8  | 1.81E-02 | transcription_start_site | + | 62452  | 62452  | 357   | 22700 | AN5626 |
| 1137 CONTIG98 | 62327  | 63291  | 1.8  | 1.81E-02 | transcription_start_site | + | 62123  | 62123  | 686   | 22699 | AN5626 |
| 1137 CONTIG98 | 62327  | 63291  | 1.8  | 1.81E-02 | transcription_start_site | + | 61944  | 61944  | 865   | 22698 | AN5626 |
| 1137 CONTIG98 | 62327  | 63291  | 1.8  | 1.81E-02 | transcription_start_site | + | 61627  | 61627  | 1182  | 22697 | AN5626 |
| 1467 CONTIG98 | 56183  | 56462  | 1.61 | 5.88E-02 | transcription_start_site | + | 60217  | 60217  | -3894 | 22695 | AN5626 |
| 1467 CONTIG98 | 56183  | 56462  | 1.61 | 5.88E-02 | transcription_start_site | + | 60320  | 60320  | -3997 | 22696 | AN5626 |
| 5 CONTIG98    | 59417  | 59837  | 3.85 | 0.00E+00 | transcription_start_site | + | 63735  | 63735  | -4108 | 22701 | AN5627 |
| 5 CONTIG98    | 59417  | 59837  | 3.85 | 0.00E+00 | transcription_start_site | + | 64101  | 64101  | -4474 | 22702 | AN5627 |
| 5 CONTIG98    | 59417  | 59837  | 3.85 | 0.00E+00 | transcription_start_site | + | 64490  | 64490  | -4863 | 22703 | AN5627 |
| 1137 CONTIG98 | 62327  | 63291  | 1.8  | 1.81E-02 | transcription_start_site | + | 63735  | 63735  | -926  | 22701 | AN5627 |
| 1137 CONTIG98 | 62327  | 63291  | 1.8  | 1.81E-02 | transcription_start_site | + | 64101  | 64101  | -1292 | 22702 | AN5627 |
| 1137 CONTIG98 | 62327  | 63291  | 1.8  | 1.81E-02 | transcription_start_site | + | 64490  | 64490  | -1681 | 22703 | AN5627 |
| 1137 CONTIG98 | 62327  | 63291  | 1.8  | 1.81E-02 | transcription_start_site | + | 68233  | 68233  | -5424 | 22704 | AN5627 |
| 2295 CONTIG98 | 73652  | 74606  | 1.27 | 1.50E-01 | transcription_start_site | - | 74211  | 74211  | 82    | 22710 | AN5629 |
| 2295 CONTIG98 | 73652  | 74606  | 1.27 | 1.50E-01 | transcription_start_site | - | 74345  | 74345  | 216   | 22709 | AN5629 |
| 2295 CONTIG98 | 73652  | 74606  | 1.27 | 1.50E-01 | transcription_start_site | - | 74670  | 74670  | 541   | 22708 | AN5629 |
| 2295 CONTIG98 | 73652  | 74606  | 1.27 | 1.50E-01 | transcription_start_site | + | 74938  | 74938  | -809  | 22711 | AN5630 |
| 2295 CONTIG98 | 73652  | 74606  | 1.27 | 1.50E-01 | transcription_start_site | + | 75009  | 75009  | -880  | 22712 | AN5630 |
| 2295 CONTIG98 | 73652  | 74606  | 1.27 | 1.50E-01 | transcription_start_site | + | 75605  | 75605  | -1476 | 22713 | AN5630 |
| 2295 CONTIG98 | 73652  | 74606  | 1.27 | 1.50E-01 | transcription_start_site | + | 75915  | 75915  | -1786 | 22714 | AN5630 |
| 2457 CONTIG98 | 86252  | 86531  | 1.22 | 1.93E-01 | transcription_start_site | - | 81337  | 81337  | -5054 | 22715 | AN5631 |
| 2457 CONTIG98 | 86252  | 86531  | 1.22 | 1.93E-01 | transcription_start_site | + | 86321  | 86321  | 70    | 22722 | AN5633 |
| 2457 CONTIG98 | 86252  | 86531  | 1.22 | 1.93E-01 | transcription_start_site | + | 87017  | 87017  | -625  | 22723 | AN5633 |
| 2457 CONTIG98 | 86252  | 86531  | 1.22 | 1.93E-01 | transcription_start_site | + | 87335  | 87335  | -943  | 22724 | AN5633 |
| 233 CONTIG98  | 90757  | 91267  | 2.88 | 6.10E-04 | transcription_start_site | - | 90541  | 90541  | -471  | 22725 | AN5634 |
| 233 CONTIG98  | 90757  | 91267  | 2.88 | 6.10E-04 | transcription_start_site | - | 90274  | 90274  | -738  | 22726 | AN5634 |
| 233 CONTIG98  | 90757  | 91267  | 2.88 | 6.10E-04 | transcription_start_site | - | 90056  | 90056  | -956  | 22727 | AN5634 |
| 858 CONTIG98  | 89267  | 89831  | 2.05 | 1.30E-02 | transcription_start_site | - | 90056  | 90056  | 507   | 22727 | AN5634 |
| 858 CONTIG98  | 89267  | 89831  | 2.05 | 1.30E-02 | transcription_start_site | - | 90274  | 90274  | 725   | 22726 | AN5634 |
| 858 CONTIG98  | 89267  | 89831  | 2.05 | 1.30E-02 | transcription_start_site | - | 90541  | 90541  | 992   | 22725 | AN5634 |
| 2151 CONTIG98 | 104552 | 104977 | 1.32 | 1.44E-01 | transcription_start_site | - | 100700 | 100700 | -4064 | 22742 | AN5637 |
| 2151 CONTIG98 | 104552 | 104977 | 1.32 | 1.44E-01 | transcription_start_site | - | 100595 | 100595 | -4169 | 22743 | AN5637 |
| 2151 CONTIG98 | 104552 | 104977 | 1.32 | 1.44E-01 | transcription_start_site | - | 100311 | 100311 | -4453 | 22744 | AN5637 |
| 2151 CONTIG98 | 104552 | 104977 | 1.32 | 1.44E-01 | transcription_start_site | - | 99941  | 99941  | -4823 | 22745 | AN5637 |
| 2151 CONTIG98 | 104552 | 104977 | 1.32 | 1.44E-01 | transcription_start_site | - | 104279 | 104279 | -485  | 22747 | AN5639 |
| 2151 CONTIG98 | 104552 | 104977 | 1.32 | 1.44E-01 | transcription_start_site | - | 104190 | 104190 | -574  | 22748 | AN5639 |
| 2151 CONTIG98 | 104552 | 104977 | 1.32 | 1.44E-01 | transcription_start_site | - | 103998 | 103998 | -766  | 22749 | AN5639 |
| 2151 CONTIG98 | 104552 | 104977 | 1.32 | 1.44E-01 | transcription_start_site | - | 103770 | 103770 | -994  | 22750 | AN5639 |
| 2151 CONTIG98 | 104552 | 104977 | 1.32 | 1.44E-01 | transcription_start_site | - | 103686 | 103686 | -1078 | 22751 | AN5639 |



|      |          |        |        |      |          |                          |   |        |        |       |       |        |
|------|----------|--------|--------|------|----------|--------------------------|---|--------|--------|-------|-------|--------|
| 2151 | CONTIG98 | 104552 | 104977 | 1.32 | 1.44E-01 | transcription_start_site | - | 103566 | 103566 | -1198 | 22752 | AN5639 |
| 2151 | CONTIG98 | 104552 | 104977 | 1.32 | 1.44E-01 | transcription_start_site | - | 103127 | 103127 | -1637 | 22753 | AN5639 |
| 2151 | CONTIG98 | 104552 | 104977 | 1.32 | 1.44E-01 | transcription_start_site | - | 103003 | 103003 | -1761 | 22754 | AN5639 |
| 1564 | CONTIG98 | 113851 | 114145 | 1.56 | 6.84E-02 | transcription_start_site | - | 108858 | 108858 | -5140 | 22755 | AN5640 |
| 1564 | CONTIG98 | 113851 | 114145 | 1.56 | 6.84E-02 | transcription_start_site | - | 112716 | 112716 | -1282 | 22759 | AN5641 |
| 1564 | CONTIG98 | 113851 | 114145 | 1.56 | 6.84E-02 | transcription_start_site | - | 112618 | 112618 | -1380 | 22760 | AN5641 |
| 1564 | CONTIG98 | 113851 | 114145 | 1.56 | 6.84E-02 | transcription_start_site | - | 112136 | 112136 | -1862 | 22761 | AN5641 |
| 1564 | CONTIG98 | 113851 | 114145 | 1.56 | 6.84E-02 | transcription_start_site | - | 114384 | 114384 | 386   | 22762 | AN5642 |
| 1564 | CONTIG98 | 113851 | 114145 | 1.56 | 6.84E-02 | transcription_start_site | + | 115107 | 115107 | -1109 | 22763 | AN5643 |
| 1564 | CONTIG98 | 113851 | 114145 | 1.56 | 6.84E-02 | transcription_start_site | + | 115325 | 115325 | -1327 | 22764 | AN5643 |
| 1564 | CONTIG98 | 113851 | 114145 | 1.56 | 6.84E-02 | transcription_start_site | + | 115406 | 115406 | -1408 | 22765 | AN5643 |
| 1564 | CONTIG98 | 113851 | 114145 | 1.56 | 6.84E-02 | transcription_start_site | + | 115610 | 115610 | -1612 | 22766 | AN5643 |
| 1564 | CONTIG98 | 113851 | 114145 | 1.56 | 6.84E-02 | transcription_start_site | + | 118620 | 118620 | -4622 | 22767 | AN5643 |
| 2296 | CONTIG98 | 135977 | 137016 | 1.27 | 1.50E-01 | transcription_start_site | - | 137216 | 137216 | 719   | 22784 | AN5649 |
| 2296 | CONTIG98 | 135977 | 137016 | 1.27 | 1.50E-01 | transcription_start_site | - | 137375 | 137375 | 878   | 22783 | AN5649 |
| 2296 | CONTIG98 | 135977 | 137016 | 1.27 | 1.50E-01 | transcription_start_site | - | 137658 | 137658 | 1161  | 22782 | AN5649 |
| 2296 | CONTIG98 | 135977 | 137016 | 1.27 | 1.50E-01 | transcription_start_site | - | 134423 | 134423 | -2073 | 22785 | AN5649 |
| 1276 | CONTIG98 | 167709 | 168888 | 1.71 | 2.64E-02 | transcription_start_site | - | 166525 | 166525 | -1773 | 22817 | AN5659 |
| 1276 | CONTIG98 | 167709 | 168888 | 1.71 | 2.64E-02 | transcription_start_site | - | 166323 | 166323 | -1975 | 22818 | AN5659 |
| 1276 | CONTIG98 | 167709 | 168888 | 1.71 | 2.64E-02 | transcription_start_site | - | 166166 | 166166 | -2132 | 22819 | AN5659 |
| 1276 | CONTIG98 | 167709 | 168888 | 1.71 | 2.64E-02 | transcription_start_site | - | 165567 | 165567 | -2731 | 22820 | AN5659 |
| 234  | CONTIG98 | 178876 | 179311 | 2.88 | 6.10E-04 | transcription_start_site | - | 177655 | 177655 | -1438 | 22821 | AN5660 |
| 234  | CONTIG98 | 178876 | 179311 | 2.88 | 6.10E-04 | transcription_start_site | - | 177296 | 177296 | -1797 | 22822 | AN5660 |
| 234  | CONTIG98 | 178876 | 179311 | 2.88 | 6.10E-04 | transcription_start_site | + | 182988 | 182988 | -3894 | 22823 | AN5662 |
| 234  | CONTIG98 | 178876 | 179311 | 2.88 | 6.10E-04 | transcription_start_site | + | 183112 | 183112 | -4018 | 22824 | AN5662 |
| 234  | CONTIG98 | 178876 | 179311 | 2.88 | 6.10E-04 | transcription_start_site | + | 183602 | 183602 | -4508 | 22825 | AN5662 |
| 234  | CONTIG98 | 178876 | 179311 | 2.88 | 6.10E-04 | transcription_start_site | + | 183919 | 183919 | -4825 | 22826 | AN5662 |
| 1083 | CONTIG98 | 187882 | 188166 | 1.85 | 2.62E-02 | transcription_start_site | + | 190863 | 190863 | -2839 | 22834 | AN5665 |
| 1083 | CONTIG98 | 187882 | 188166 | 1.85 | 2.62E-02 | transcription_start_site | + | 191240 | 191240 | -3216 | 22835 | AN5665 |
| 1083 | CONTIG98 | 187882 | 188166 | 1.85 | 2.62E-02 | transcription_start_site | + | 191530 | 191530 | -3506 | 22836 | AN5665 |
| 1083 | CONTIG98 | 187882 | 188166 | 1.85 | 2.62E-02 | transcription_start_site | + | 192472 | 192472 | -4448 | 22837 | AN5665 |
| 1468 | CONTIG98 | 196512 | 196866 | 1.61 | 5.88E-02 | transcription_start_site | - | 193961 | 193961 | -2728 | 22838 | AN5666 |
| 1468 | CONTIG98 | 196512 | 196866 | 1.61 | 5.88E-02 | transcription_start_site | - | 193847 | 193847 | -2842 | 22839 | AN5666 |
| 1468 | CONTIG98 | 196512 | 196866 | 1.61 | 5.88E-02 | transcription_start_site | - | 193482 | 193482 | -3207 | 22840 | AN5666 |
| 2021 | CONTIG98 | 197027 | 197606 | 1.37 | 1.25E-01 | transcription_start_site | - | 193961 | 193961 | -3355 | 22838 | AN5666 |
| 2021 | CONTIG98 | 197027 | 197606 | 1.37 | 1.25E-01 | transcription_start_site | - | 193847 | 193847 | -3469 | 22839 | AN5666 |
| 2021 | CONTIG98 | 197027 | 197606 | 1.37 | 1.25E-01 | transcription_start_site | - | 193482 | 193482 | -3834 | 22840 | AN5666 |
| 1468 | CONTIG98 | 196512 | 196866 | 1.61 | 5.88E-02 | transcription_start_site | - | 197315 | 197315 | 626   | 22842 | AN5667 |
| 1468 | CONTIG98 | 196512 | 196866 | 1.61 | 5.88E-02 | transcription_start_site | - | 197632 | 197632 | 943   | 22841 | AN5667 |
| 1907 | CONTIG98 | 199292 | 199865 | 1.41 | 9.26E-02 | transcription_start_site | - | 197632 | 197632 | -1946 | 22841 | AN5667 |
| 1907 | CONTIG98 | 199292 | 199865 | 1.41 | 9.26E-02 | transcription_start_site | - | 197315 | 197315 | -2263 | 22842 | AN5667 |
| 2021 | CONTIG98 | 197027 | 197606 | 1.37 | 1.25E-01 | transcription_start_site | - | 197315 | 197315 | -1    | 22842 | AN5667 |
| 2021 | CONTIG98 | 197027 | 197606 | 1.37 | 1.25E-01 | transcription_start_site | - | 197632 | 197632 | 315   | 22841 | AN5667 |
| 1907 | CONTIG98 | 199292 | 199865 | 1.41 | 9.26E-02 | transcription_start_site | - | 199509 | 199509 | -69   | 22843 | AN5668 |
| 1907 | CONTIG98 | 199292 | 199865 | 1.41 | 9.26E-02 | transcription_start_site | - | 199384 | 199384 | -194  | 22844 | AN5668 |
| 1907 | CONTIG98 | 199292 | 199865 | 1.41 | 9.26E-02 | transcription_start_site | - | 198809 | 198809 | -769  | 22845 | AN5668 |
| 903  | CONTIG98 | 210002 | 210593 | 2    | 1.57E-02 | transcription_start_site | + | 211676 | 211676 | -1378 | 22853 | AN5671 |
| 903  | CONTIG98 | 210002 | 210593 | 2    | 1.57E-02 | transcription_start_site | + | 212260 | 212260 | -1962 | 22854 | AN5671 |
| 903  | CONTIG98 | 210002 | 210593 | 2    | 1.57E-02 | transcription_start_site | + | 212796 | 212796 | -2498 | 22855 | AN5671 |
| 903  | CONTIG98 | 210002 | 210593 | 2    | 1.57E-02 | transcription_start_site | + | 213183 | 213183 | -2885 | 22856 | AN5671 |
| 1084 | CONTIG98 | 210757 | 211331 | 1.85 | 2.62E-02 | transcription_start_site | + | 211676 | 211676 | -632  | 22853 | AN5671 |
| 1084 | CONTIG98 | 210757 | 211331 | 1.85 | 2.62E-02 | transcription_start_site | + | 212260 | 212260 | -1216 | 22854 | AN5671 |
| 1084 | CONTIG98 | 210757 | 211331 | 1.85 | 2.62E-02 | transcription_start_site | + | 212796 | 212796 | -1752 | 22855 | AN5671 |
| 1084 | CONTIG98 | 210757 | 211331 | 1.85 | 2.62E-02 | transcription_start_site | + | 213183 | 213183 | -2139 | 22856 | AN5671 |
| 1678 | CONTIG98 | 216839 | 217195 | 1.51 | 8.01E-02 | transcription_start_site | - | 216711 | 216711 | -306  | 22857 | AN5672 |
| 1678 | CONTIG98 | 216839 | 217195 | 1.51 | 8.01E-02 | transcription_start_site | - | 216570 | 216570 | -447  | 22858 | AN5672 |
| 1678 | CONTIG98 | 216839 | 217195 | 1.51 | 8.01E-02 | transcription_start_site | - | 216297 | 216297 | -720  | 22859 | AN5672 |

|               |        |        |      |          |                          |   |        |        |       |       |        |
|---------------|--------|--------|------|----------|--------------------------|---|--------|--------|-------|-------|--------|
| 1678 CONTIG98 | 216839 | 217195 | 1.51 | 8.01E-02 | transcription_start_site | + | 217454 | 217454 | -437  | 22860 | AN5673 |
| 1678 CONTIG98 | 216839 | 217195 | 1.51 | 8.01E-02 | transcription_start_site | + | 217737 | 217737 | -720  | 22861 | AN5673 |
| 1678 CONTIG98 | 216839 | 217195 | 1.51 | 8.01E-02 | transcription_start_site | + | 217875 | 217875 | -858  | 22862 | AN5673 |
| 1678 CONTIG98 | 216839 | 217195 | 1.51 | 8.01E-02 | transcription_start_site | + | 218066 | 218066 | -1049 | 22863 | AN5673 |
| 1678 CONTIG98 | 216839 | 217195 | 1.51 | 8.01E-02 | transcription_start_site | + | 219470 | 219470 | -2453 | 22864 | AN5673 |
| 1678 CONTIG98 | 216839 | 217195 | 1.51 | 8.01E-02 | transcription_start_site | + | 220391 | 220391 | -3374 | 22865 | AN5673 |
| 1678 CONTIG98 | 216839 | 217195 | 1.51 | 8.01E-02 | transcription_start_site | + | 220765 | 220765 | -3748 | 22866 | AN5673 |
| 1794 CONTIG98 | 230855 | 231135 | 1.46 | 9.24E-02 | transcription_start_site | - | 227591 | 227591 | -3404 | 22870 | AN5675 |
| 1794 CONTIG98 | 230855 | 231135 | 1.46 | 9.24E-02 | transcription_start_site | - | 227062 | 227062 | -3933 | 22871 | AN5675 |
| 1794 CONTIG98 | 230855 | 231135 | 1.46 | 9.24E-02 | transcription_start_site | - | 231708 | 231708 | 713   | 22880 | AN5677 |
| 1794 CONTIG98 | 230855 | 231135 | 1.46 | 9.24E-02 | transcription_start_site | - | 231964 | 231964 | 969   | 22879 | AN5677 |
| 1794 CONTIG98 | 230855 | 231135 | 1.46 | 9.24E-02 | transcription_start_site | - | 232109 | 232109 | 1114  | 22878 | AN5677 |
| 2022 CONTIG98 | 244127 | 244411 | 1.37 | 1.25E-01 | transcription_start_site | - | 241131 | 241131 | -3138 | 22892 | AN5681 |
| 2022 CONTIG98 | 244127 | 244411 | 1.37 | 1.25E-01 | transcription_start_site | - | 243818 | 243818 | -451  | 22899 | AN5683 |
| 2022 CONTIG98 | 244127 | 244411 | 1.37 | 1.25E-01 | transcription_start_site | - | 244900 | 244900 | 631   | 22898 | AN5683 |
| 2022 CONTIG98 | 244127 | 244411 | 1.37 | 1.25E-01 | transcription_start_site | + | 246922 | 246922 | -2653 | 22905 | AN5685 |
| 2022 CONTIG98 | 244127 | 244411 | 1.37 | 1.25E-01 | transcription_start_site | + | 247178 | 247178 | -2909 | 22906 | AN5685 |
| 2022 CONTIG98 | 244127 | 244411 | 1.37 | 1.25E-01 | transcription_start_site | + | 249101 | 249101 | -4832 | 22910 | AN5687 |
| 1142 CONTIG98 | 258237 | 258516 | 1.8  | 3.08E-02 | transcription_start_site | - | 256697 | 256697 | -1679 | 22917 | AN5689 |
| 1142 CONTIG98 | 258237 | 258516 | 1.8  | 3.08E-02 | transcription_start_site | - | 255925 | 255925 | -2451 | 22918 | AN5689 |
| 1142 CONTIG98 | 258237 | 258516 | 1.8  | 3.08E-02 | transcription_start_site | - | 259101 | 259101 | 724   | 22922 | AN5690 |
| 1142 CONTIG98 | 258237 | 258516 | 1.8  | 3.08E-02 | transcription_start_site | + | 262015 | 262015 | -3638 | 22923 | AN5691 |
| 1142 CONTIG98 | 258237 | 258516 | 1.8  | 3.08E-02 | transcription_start_site | + | 262218 | 262218 | -3841 | 22924 | AN5691 |
| 1142 CONTIG98 | 258237 | 258516 | 1.8  | 3.08E-02 | transcription_start_site | + | 263062 | 263062 | -4685 | 22925 | AN5691 |
| 1142 CONTIG98 | 258237 | 258516 | 1.8  | 3.08E-02 | transcription_start_site | + | 263344 | 263344 | -4967 | 22926 | AN5691 |
| 2458 CONTIG98 | 283140 | 283419 | 1.22 | 1.93E-01 | transcription_start_site | - | 281317 | 281317 | -1962 | 22939 | AN5698 |
| 2458 CONTIG98 | 283140 | 283419 | 1.22 | 1.93E-01 | transcription_start_site | - | 282978 | 282978 | -301  | 22940 | AN5699 |
| 2458 CONTIG98 | 283140 | 283419 | 1.22 | 1.93E-01 | transcription_start_site | - | 282841 | 282841 | -438  | 22941 | AN5699 |
| 2458 CONTIG98 | 283140 | 283419 | 1.22 | 1.93E-01 | transcription_start_site | + | 283605 | 283605 | -325  | 22942 | AN5700 |
| 2458 CONTIG98 | 283140 | 283419 | 1.22 | 1.93E-01 | transcription_start_site | + | 287571 | 287571 | -4291 | 22943 | AN5701 |
| 2458 CONTIG98 | 283140 | 283419 | 1.22 | 1.93E-01 | transcription_start_site | + | 287649 | 287649 | -4369 | 22944 | AN5701 |
| 2458 CONTIG98 | 283140 | 283419 | 1.22 | 1.93E-01 | transcription_start_site | + | 287787 | 287787 | -4507 | 22945 | AN5701 |
| 2013 CONTIG98 | 297227 | 298123 | 1.37 | 1.07E-01 | transcription_start_site | - | 292658 | 292658 | -5017 | 22949 | AN5703 |
| 2013 CONTIG98 | 297227 | 298123 | 1.37 | 1.07E-01 | transcription_start_site | - | 292259 | 292259 | -5416 | 22950 | AN5703 |
| 2013 CONTIG98 | 297227 | 298123 | 1.37 | 1.07E-01 | transcription_start_site | + | 300815 | 300815 | -3140 | 22962 | AN5707 |
| 2013 CONTIG98 | 297227 | 298123 | 1.37 | 1.07E-01 | transcription_start_site | + | 300885 | 300885 | -3210 | 22963 | AN5707 |
| 2013 CONTIG98 | 297227 | 298123 | 1.37 | 1.07E-01 | transcription_start_site | + | 302197 | 302197 | -4522 | 22964 | AN5708 |
| 2013 CONTIG98 | 297227 | 298123 | 1.37 | 1.07E-01 | transcription_start_site | + | 302623 | 302623 | -4948 | 22965 | AN5708 |
| 27 CONTIG98   | 308778 | 309137 | 3.56 | 0.00E+00 | transcription_start_site | - | 308403 | 308403 | -554  | 22968 | AN5709 |
| 27 CONTIG98   | 308778 | 309137 | 3.56 | 0.00E+00 | transcription_start_site | - | 308254 | 308254 | -703  | 22969 | AN5709 |
| 27 CONTIG98   | 308778 | 309137 | 3.56 | 0.00E+00 | transcription_start_site | - | 306578 | 306578 | -2379 | 22970 | AN5709 |
| 102 CONTIG98  | 305938 | 306282 | 3.22 | 0.00E+00 | transcription_start_site | - | 306578 | 306578 | 468   | 22970 | AN5709 |
| 706 CONTIG98  | 307218 | 307852 | 2.19 | 3.31E-03 | transcription_start_site | - | 308254 | 308254 | 719   | 22969 | AN5709 |
| 706 CONTIG98  | 307218 | 307852 | 2.19 | 3.31E-03 | transcription_start_site | - | 308403 | 308403 | 868   | 22968 | AN5709 |
| 706 CONTIG98  | 307218 | 307852 | 2.19 | 3.31E-03 | transcription_start_site | - | 306578 | 306578 | -957  | 22970 | AN5709 |
| 617 CONTIG98  | 316426 | 316720 | 2.29 | 5.20E-03 | transcription_start_site | - | 312966 | 312966 | -3607 | 22971 | AN5710 |
| 617 CONTIG98  | 316426 | 316720 | 2.29 | 5.20E-03 | transcription_start_site | - | 312834 | 312834 | -3739 | 22972 | AN5710 |
| 617 CONTIG98  | 316426 | 316720 | 2.29 | 5.20E-03 | transcription_start_site | - | 312660 | 312660 | -3913 | 22973 | AN5710 |
| 617 CONTIG98  | 316426 | 316720 | 2.29 | 5.20E-03 | transcription_start_site | - | 312522 | 312522 | -4051 | 22974 | AN5710 |
| 617 CONTIG98  | 316426 | 316720 | 2.29 | 5.20E-03 | transcription_start_site | - | 312178 | 312178 | -4395 | 22975 | AN5710 |
| 617 CONTIG98  | 316426 | 316720 | 2.29 | 5.20E-03 | transcription_start_site | - | 311855 | 311855 | -4718 | 22976 | AN5710 |
| 617 CONTIG98  | 316426 | 316720 | 2.29 | 5.20E-03 | transcription_start_site | - | 311437 | 311437 | -5136 | 22977 | AN5710 |
| 27 CONTIG98   | 308778 | 309137 | 3.56 | 0.00E+00 | transcription_start_site | + | 313279 | 313279 | -4321 | 22979 | AN5711 |
| 27 CONTIG98   | 308778 | 309137 | 3.56 | 0.00E+00 | transcription_start_site | + | 313569 | 313569 | -4611 | 22980 | AN5711 |
| 27 CONTIG98   | 308778 | 309137 | 3.56 | 0.00E+00 | transcription_start_site | + | 313761 | 313761 | -4803 | 22981 | AN5711 |
| 617 CONTIG98  | 316426 | 316720 | 2.29 | 5.20E-03 | transcription_start_site | - | 316393 | 316393 | -180  | 22982 | AN5712 |
| 617 CONTIG98  | 316426 | 316720 | 2.29 | 5.20E-03 | transcription_start_site | - | 316147 | 316147 | -426  | 22983 | AN5712 |

|               |        |        |      |          |                          |   |        |        |       |       |        |
|---------------|--------|--------|------|----------|--------------------------|---|--------|--------|-------|-------|--------|
| 617 CONTIG98  | 316426 | 316720 | 2.29 | 5.20E-03 | transcription_start_site | - | 315952 | 315952 | -621  | 22984 | AN5712 |
| 617 CONTIG98  | 316426 | 316720 | 2.29 | 5.20E-03 | transcription_start_site | - | 315832 | 315832 | -741  | 22985 | AN5712 |
| 617 CONTIG98  | 316426 | 316720 | 2.29 | 5.20E-03 | transcription_start_site | - | 314779 | 314779 | -1794 | 22986 | AN5712 |
| 617 CONTIG98  | 316426 | 316720 | 2.29 | 5.20E-03 | transcription_start_site | - | 317524 | 317524 | 951   | 22992 | AN5713 |
| 617 CONTIG98  | 316426 | 316720 | 2.29 | 5.20E-03 | transcription_start_site | + | 321504 | 321504 | -4931 | 22993 | AN5714 |
| 1202 CONTIG98 | 325295 | 325649 | 1.76 | 2.18E-02 | transcription_start_site | - | 325172 | 325172 | -300  | 22995 | AN5715 |
| 1202 CONTIG98 | 325295 | 325649 | 1.76 | 2.18E-02 | transcription_start_site | - | 324940 | 324940 | -532  | 22996 | AN5715 |
| 1202 CONTIG98 | 325295 | 325649 | 1.76 | 2.18E-02 | transcription_start_site | - | 324630 | 324630 | -842  | 22997 | AN5715 |
| 1202 CONTIG98 | 325295 | 325649 | 1.76 | 2.18E-02 | transcription_start_site | - | 324459 | 324459 | -1013 | 22998 | AN5715 |
| 1202 CONTIG98 | 325295 | 325649 | 1.76 | 2.18E-02 | transcription_start_site | + | 325945 | 325945 | -473  | 22999 | AN5716 |
| 1202 CONTIG98 | 325295 | 325649 | 1.76 | 2.18E-02 | transcription_start_site | + | 326257 | 326257 | -785  | 23000 | AN5716 |
| 1202 CONTIG98 | 325295 | 325649 | 1.76 | 2.18E-02 | transcription_start_site | + | 327181 | 327181 | -1709 | 23001 | AN5716 |
| 1202 CONTIG98 | 325295 | 325649 | 1.76 | 2.18E-02 | transcription_start_site | + | 327332 | 327332 | -1860 | 23002 | AN5716 |
| 1202 CONTIG98 | 325295 | 325649 | 1.76 | 2.18E-02 | transcription_start_site | + | 328877 | 328877 | -3405 | 23003 | AN5717 |
| 1202 CONTIG98 | 325295 | 325649 | 1.76 | 2.18E-02 | transcription_start_site | + | 329165 | 329165 | -3693 | 23004 | AN5717 |
| 1202 CONTIG98 | 325295 | 325649 | 1.76 | 2.18E-02 | transcription_start_site | + | 329464 | 329464 | -3992 | 23005 | AN5717 |
| 1202 CONTIG98 | 325295 | 325649 | 1.76 | 2.18E-02 | transcription_start_site | + | 329708 | 329708 | -4236 | 23006 | AN5717 |
| 1202 CONTIG98 | 325295 | 325649 | 1.76 | 2.18E-02 | transcription_start_site | + | 330191 | 330191 | -4719 | 23007 | AN5717 |
| 904 CONTIG98  | 340504 | 340778 | 2    | 1.57E-02 | transcription_start_site | - | 337630 | 337630 | -3011 | 23020 | AN5720 |
| 904 CONTIG98  | 340504 | 340778 | 2    | 1.57E-02 | transcription_start_site | - | 337453 | 337453 | -3188 | 23021 | AN5720 |
| 904 CONTIG98  | 340504 | 340778 | 2    | 1.57E-02 | transcription_start_site | - | 336770 | 336770 | -3871 | 23022 | AN5720 |
| 904 CONTIG98  | 340504 | 340778 | 2    | 1.57E-02 | transcription_start_site | - | 336669 | 336669 | -3972 | 23023 | AN5720 |
| 904 CONTIG98  | 340504 | 340778 | 2    | 1.57E-02 | transcription_start_site | - | 336558 | 336558 | -4083 | 23024 | AN5720 |
| 904 CONTIG98  | 340504 | 340778 | 2    | 1.57E-02 | transcription_start_site | - | 340314 | 340314 | -327  | 23025 | AN5721 |
| 904 CONTIG98  | 340504 | 340778 | 2    | 1.57E-02 | transcription_start_site | + | 340709 | 340709 | -68   | 23026 | AN5722 |
| 904 CONTIG98  | 340504 | 340778 | 2    | 1.57E-02 | transcription_start_site | + | 341424 | 341424 | -783  | 23027 | AN5722 |
| 904 CONTIG98  | 340504 | 340778 | 2    | 1.57E-02 | transcription_start_site | + | 342504 | 342504 | -1863 | 23028 | AN5722 |
| 904 CONTIG98  | 340504 | 340778 | 2    | 1.57E-02 | transcription_start_site | + | 343263 | 343263 | -2622 | 23029 | AN5723 |
| 904 CONTIG98  | 340504 | 340778 | 2    | 1.57E-02 | transcription_start_site | + | 343457 | 343457 | -2816 | 23030 | AN5723 |
| 904 CONTIG98  | 340504 | 340778 | 2    | 1.57E-02 | transcription_start_site | + | 343550 | 343550 | -2909 | 23031 | AN5723 |
| 2297 CONTIG98 | 350409 | 351654 | 1.27 | 1.59E-01 | transcription_start_site | - | 345672 | 345672 | -5359 | 23032 | AN5724 |
| 1206 CONTIG98 | 351754 | 352193 | 1.76 | 3.70E-02 | transcription_start_site | - | 350632 | 350632 | -1341 | 23036 | AN5726 |
| 1206 CONTIG98 | 351754 | 352193 | 1.76 | 3.70E-02 | transcription_start_site | - | 349408 | 349408 | -2565 | 23037 | AN5726 |
| 2297 CONTIG98 | 350409 | 351654 | 1.27 | 1.59E-01 | transcription_start_site | - | 350632 | 350632 | -399  | 23036 | AN5726 |
| 2297 CONTIG98 | 350409 | 351654 | 1.27 | 1.59E-01 | transcription_start_site | - | 349408 | 349408 | -1623 | 23037 | AN5726 |
| 1206 CONTIG98 | 351754 | 352193 | 1.76 | 3.70E-02 | transcription_start_site | - | 352315 | 352315 | 341   | 23040 | AN5727 |
| 1206 CONTIG98 | 351754 | 352193 | 1.76 | 3.70E-02 | transcription_start_site | - | 353089 | 353089 | 1115  | 23039 | AN5727 |
| 2297 CONTIG98 | 350409 | 351654 | 1.27 | 1.59E-01 | transcription_start_site | - | 352315 | 352315 | 1283  | 23040 | AN5727 |
| 166 CONTIG98  | 359034 | 359538 | 3.02 | 0.00E+00 | transcription_start_site | - | 357976 | 357976 | -1310 | 23041 | AN5728 |
| 166 CONTIG98  | 359034 | 359538 | 3.02 | 0.00E+00 | transcription_start_site | - | 357204 | 357204 | -2082 | 23042 | AN5728 |
| 207 CONTIG98  | 360086 | 360580 | 2.93 | 2.16E-04 | transcription_start_site | - | 357976 | 357976 | -2357 | 23041 | AN5728 |
| 207 CONTIG98  | 360086 | 360580 | 2.93 | 2.16E-04 | transcription_start_site | - | 357204 | 357204 | -3129 | 23042 | AN5728 |
| 1013 CONTIG98 | 373353 | 373632 | 1.9  | 2.12E-02 | transcription_start_site | - | 373531 | 373531 | 38    | 23050 | AN5731 |
| 1013 CONTIG98 | 373353 | 373632 | 1.9  | 2.12E-02 | transcription_start_site | - | 373949 | 373949 | 456   | 23049 | AN5731 |
| 1013 CONTIG98 | 373353 | 373632 | 1.9  | 2.12E-02 | transcription_start_site | - | 374041 | 374041 | 548   | 23048 | AN5731 |
| 1013 CONTIG98 | 373353 | 373632 | 1.9  | 2.12E-02 | transcription_start_site | + | 374382 | 374382 | -889  | 23051 | AN5732 |
| 1013 CONTIG98 | 373353 | 373632 | 1.9  | 2.12E-02 | transcription_start_site | + | 375397 | 375397 | -1904 | 23052 | AN5732 |
| 1013 CONTIG98 | 373353 | 373632 | 1.9  | 2.12E-02 | transcription_start_site | + | 375555 | 375555 | -2062 | 23053 | AN5732 |
| 1013 CONTIG98 | 373353 | 373632 | 1.9  | 2.12E-02 | transcription_start_site | + | 376614 | 376614 | -3121 | 23054 | AN5733 |
| 1013 CONTIG98 | 373353 | 373632 | 1.9  | 2.12E-02 | transcription_start_site | + | 377157 | 377157 | -3664 | 23055 | AN5733 |
| 1013 CONTIG98 | 373353 | 373632 | 1.9  | 2.12E-02 | transcription_start_site | + | 377872 | 377872 | -4379 | 23056 | AN5733 |
| 1013 CONTIG98 | 373353 | 373632 | 1.9  | 2.12E-02 | transcription_start_site | + | 378489 | 378489 | -4996 | 23057 | AN5733 |
| 1795 CONTIG98 | 412143 | 412402 | 1.46 | 9.24E-02 | transcription_start_site | - | 409790 | 409790 | -2482 | 23116 | AN5745 |
| 1795 CONTIG98 | 412143 | 412402 | 1.46 | 9.24E-02 | transcription_start_site | - | 409717 | 409717 | -2555 | 23117 | AN5745 |
| 1795 CONTIG98 | 412143 | 412402 | 1.46 | 9.24E-02 | transcription_start_site | - | 409582 | 409582 | -2690 | 23118 | AN5745 |
| 1795 CONTIG98 | 412143 | 412402 | 1.46 | 9.24E-02 | transcription_start_site | - | 411863 | 411863 | -409  | 23119 | AN5746 |
| 1795 CONTIG98 | 412143 | 412402 | 1.46 | 9.24E-02 | transcription_start_site | - | 411676 | 411676 | -596  | 23120 | AN5746 |

|      |          |        |        |      |          |                          |   |        |        |       |       |        |
|------|----------|--------|--------|------|----------|--------------------------|---|--------|--------|-------|-------|--------|
| 1795 | CONTIG98 | 412143 | 412402 | 1.46 | 9.24E-02 | transcription_start_site | - | 411552 | 411552 | -720  | 23121 | AN5746 |
| 1795 | CONTIG98 | 412143 | 412402 | 1.46 | 9.24E-02 | transcription_start_site | - | 411158 | 411158 | -1114 | 23122 | AN5746 |
| 1795 | CONTIG98 | 412143 | 412402 | 1.46 | 9.24E-02 | transcription_start_site | - | 410666 | 410666 | -1606 | 23123 | AN5746 |
| 1795 | CONTIG98 | 412143 | 412402 | 1.46 | 9.24E-02 | transcription_start_site | + | 413073 | 413073 | -800  | 23124 | AN5747 |
| 1795 | CONTIG98 | 412143 | 412402 | 1.46 | 9.24E-02 | transcription_start_site | + | 413356 | 413356 | -1083 | 23125 | AN5747 |
| 1795 | CONTIG98 | 412143 | 412402 | 1.46 | 9.24E-02 | transcription_start_site | + | 413792 | 413792 | -1519 | 23126 | AN5747 |
| 1795 | CONTIG98 | 412143 | 412402 | 1.46 | 9.24E-02 | transcription_start_site | + | 414298 | 414298 | -2025 | 23127 | AN5747 |
| 1795 | CONTIG98 | 412143 | 412402 | 1.46 | 9.24E-02 | transcription_start_site | + | 415019 | 415019 | -2746 | 23128 | AN5748 |
| 1795 | CONTIG98 | 412143 | 412402 | 1.46 | 9.24E-02 | transcription_start_site | + | 415576 | 415576 | -3303 | 23129 | AN5748 |
| 1795 | CONTIG98 | 412143 | 412402 | 1.46 | 9.24E-02 | transcription_start_site | + | 416269 | 416269 | -3996 | 23130 | AN5748 |
| 257  | CONTIG98 | 420229 | 420527 | 2.83 | 5.64E-04 | transcription_start_site | - | 418762 | 418762 | -1616 | 23131 | AN5749 |
| 411  | CONTIG98 | 419409 | 420128 | 2.59 | 1.54E-03 | transcription_start_site | - | 418762 | 418762 | -1006 | 23131 | AN5749 |
| 257  | CONTIG98 | 420229 | 420527 | 2.83 | 5.64E-04 | transcription_start_site | + | 421082 | 421082 | -704  | 23132 | AN5750 |
| 257  | CONTIG98 | 420229 | 420527 | 2.83 | 5.64E-04 | transcription_start_site | + | 421488 | 421488 | -1110 | 23133 | AN5750 |
| 411  | CONTIG98 | 419409 | 420128 | 2.59 | 1.54E-03 | transcription_start_site | + | 421082 | 421082 | -1313 | 23132 | AN5750 |
| 411  | CONTIG98 | 419409 | 420128 | 2.59 | 1.54E-03 | transcription_start_site | + | 421488 | 421488 | -1719 | 23133 | AN5750 |
| 539  | CONTIG98 | 427893 | 428465 | 2.39 | 4.46E-04 | transcription_start_site | - | 426324 | 426324 | -1855 | 23134 | AN5751 |
| 539  | CONTIG98 | 427893 | 428465 | 2.39 | 4.46E-04 | transcription_start_site | - | 426181 | 426181 | -1998 | 23135 | AN5751 |
| 539  | CONTIG98 | 427893 | 428465 | 2.39 | 4.46E-04 | transcription_start_site | - | 425955 | 425955 | -2224 | 23136 | AN5751 |
| 539  | CONTIG98 | 427893 | 428465 | 2.39 | 4.46E-04 | transcription_start_site | - | 425794 | 425794 | -2385 | 23137 | AN5751 |
| 539  | CONTIG98 | 427893 | 428465 | 2.39 | 4.46E-04 | transcription_start_site | - | 425440 | 425440 | -2739 | 23138 | AN5751 |
| 539  | CONTIG98 | 427893 | 428465 | 2.39 | 4.46E-04 | transcription_start_site | - | 425252 | 425252 | -2927 | 23139 | AN5751 |
| 539  | CONTIG98 | 427893 | 428465 | 2.39 | 4.46E-04 | transcription_start_site | - | 425061 | 425061 | -3118 | 23140 | AN5751 |
| 539  | CONTIG98 | 427893 | 428465 | 2.39 | 4.46E-04 | transcription_start_site | - | 424728 | 424728 | -3451 | 23141 | AN5751 |
| 539  | CONTIG98 | 427893 | 428465 | 2.39 | 4.46E-04 | transcription_start_site | - | 424349 | 424349 | -3830 | 23142 | AN5751 |
| 539  | CONTIG98 | 427893 | 428465 | 2.39 | 4.46E-04 | transcription_start_site | - | 423761 | 423761 | -4418 | 23143 | AN5751 |
| 539  | CONTIG98 | 427893 | 428465 | 2.39 | 4.46E-04 | transcription_start_site | - | 423656 | 423656 | -4523 | 23144 | AN5751 |
| 539  | CONTIG98 | 427893 | 428465 | 2.39 | 4.46E-04 | transcription_start_site | - | 423306 | 423306 | -4873 | 23145 | AN5751 |
| 539  | CONTIG98 | 427893 | 428465 | 2.39 | 4.46E-04 | transcription_start_site | - | 427671 | 427671 | -508  | 23146 | AN5752 |
| 539  | CONTIG98 | 427893 | 428465 | 2.39 | 4.46E-04 | transcription_start_site | - | 427127 | 427127 | -1052 | 23147 | AN5752 |
| 2310 | CONTIG98 | 432467 | 432741 | 1.27 | 1.66E-01 | transcription_start_site | - | 427671 | 427671 | -4933 | 23146 | AN5752 |
| 539  | CONTIG98 | 427893 | 428465 | 2.39 | 4.46E-04 | transcription_start_site | + | 428704 | 428704 | -525  | 23148 | AN5753 |
| 539  | CONTIG98 | 427893 | 428465 | 2.39 | 4.46E-04 | transcription_start_site | + | 428833 | 428833 | -654  | 23149 | AN5753 |
| 539  | CONTIG98 | 427893 | 428465 | 2.39 | 4.46E-04 | transcription_start_site | + | 429806 | 429806 | -1627 | 23150 | AN5754 |
| 539  | CONTIG98 | 427893 | 428465 | 2.39 | 4.46E-04 | transcription_start_site | + | 430015 | 430015 | -1836 | 23151 | AN5754 |
| 539  | CONTIG98 | 427893 | 428465 | 2.39 | 4.46E-04 | transcription_start_site | + | 430175 | 430175 | -1996 | 23152 | AN5754 |
| 539  | CONTIG98 | 427893 | 428465 | 2.39 | 4.46E-04 | transcription_start_site | + | 430235 | 430235 | -2056 | 23153 | AN5754 |
| 539  | CONTIG98 | 427893 | 428465 | 2.39 | 4.46E-04 | transcription_start_site | + | 430370 | 430370 | -2191 | 23154 | AN5754 |
| 539  | CONTIG98 | 427893 | 428465 | 2.39 | 4.46E-04 | transcription_start_site | + | 430802 | 430802 | -2623 | 23155 | AN5754 |
| 63   | CONTIG98 | 436515 | 437082 | 3.37 | 0.00E+00 | transcription_start_site | - | 433532 | 433532 | -3266 | 23156 | AN5755 |
| 412  | CONTIG98 | 433953 | 434251 | 2.59 | 1.54E-03 | transcription_start_site | - | 433532 | 433532 | -570  | 23156 | AN5755 |
| 701  | CONTIG98 | 434343 | 435442 | 2.19 | 1.28E-03 | transcription_start_site | - | 433532 | 433532 | -1360 | 23156 | AN5755 |
| 2310 | CONTIG98 | 432467 | 432741 | 1.27 | 1.66E-01 | transcription_start_site | - | 433532 | 433532 | 928   | 23156 | AN5755 |
| 63   | CONTIG98 | 436515 | 437082 | 3.37 | 0.00E+00 | transcription_start_site | + | 436227 | 436227 | 571   | 23158 | AN5756 |
| 63   | CONTIG98 | 436515 | 437082 | 3.37 | 0.00E+00 | transcription_start_site | + | 436065 | 436065 | 733   | 23157 | AN5756 |
| 412  | CONTIG98 | 433953 | 434251 | 2.59 | 1.54E-03 | transcription_start_site | + | 436065 | 436065 | -1963 | 23157 | AN5756 |
| 412  | CONTIG98 | 433953 | 434251 | 2.59 | 1.54E-03 | transcription_start_site | + | 436227 | 436227 | -2125 | 23158 | AN5756 |
| 701  | CONTIG98 | 434343 | 435442 | 2.19 | 1.28E-03 | transcription_start_site | + | 436065 | 436065 | -1172 | 23157 | AN5756 |
| 701  | CONTIG98 | 434343 | 435442 | 2.19 | 1.28E-03 | transcription_start_site | + | 436227 | 436227 | -1334 | 23158 | AN5756 |
| 2310 | CONTIG98 | 432467 | 432741 | 1.27 | 1.66E-01 | transcription_start_site | + | 436065 | 436065 | -3461 | 23157 | AN5756 |
| 2310 | CONTIG98 | 432467 | 432741 | 1.27 | 1.66E-01 | transcription_start_site | + | 436227 | 436227 | -3623 | 23158 | AN5756 |
| 1679 | CONTIG98 | 443705 | 443986 | 1.51 | 8.01E-02 | transcription_start_site | - | 443055 | 443055 | -790  | 23159 | AN5757 |
| 1679 | CONTIG98 | 443705 | 443986 | 1.51 | 8.01E-02 | transcription_start_site | - | 442873 | 442873 | -972  | 23160 | AN5757 |
| 1679 | CONTIG98 | 443705 | 443986 | 1.51 | 8.01E-02 | transcription_start_site | - | 442757 | 442757 | -1088 | 23161 | AN5757 |
| 1679 | CONTIG98 | 443705 | 443986 | 1.51 | 8.01E-02 | transcription_start_site | - | 442554 | 442554 | -1291 | 23162 | AN5757 |
| 1679 | CONTIG98 | 443705 | 443986 | 1.51 | 8.01E-02 | transcription_start_site | - | 442102 | 442102 | -1743 | 23163 | AN5757 |
| 1679 | CONTIG98 | 443705 | 443986 | 1.51 | 8.01E-02 | transcription_start_site | - | 441471 | 441471 | -2374 | 23164 | AN5757 |

|      |          |        |        |      |          |                          |   |        |        |       |       |        |
|------|----------|--------|--------|------|----------|--------------------------|---|--------|--------|-------|-------|--------|
| 1014 | CONTIG98 | 448802 | 449086 | 1.9  | 2.12E-02 | transcription_start_site | - | 446674 | 446674 | -2270 | 23165 | AN5758 |
| 1014 | CONTIG98 | 448802 | 449086 | 1.9  | 2.12E-02 | transcription_start_site | - | 446479 | 446479 | -2465 | 23166 | AN5758 |
| 1014 | CONTIG98 | 448802 | 449086 | 1.9  | 2.12E-02 | transcription_start_site | - | 446074 | 446074 | -2870 | 23167 | AN5758 |
| 1014 | CONTIG98 | 448802 | 449086 | 1.9  | 2.12E-02 | transcription_start_site | - | 445587 | 445587 | -3357 | 23168 | AN5758 |
| 1014 | CONTIG98 | 448802 | 449086 | 1.9  | 2.12E-02 | transcription_start_site | - | 449997 | 449997 | 1053  | 23172 | AN5759 |
| 1014 | CONTIG98 | 448802 | 449086 | 1.9  | 2.12E-02 | transcription_start_site | + | 453767 | 453767 | -4823 | 23177 | AN5761 |
| 1014 | CONTIG98 | 448802 | 449086 | 1.9  | 2.12E-02 | transcription_start_site | + | 453972 | 453972 | -5028 | 23178 | AN5761 |
| 230  | CONTIG98 | 459308 | 459732 | 2.88 | 0.00E+00 | transcription_start_site | - | 455565 | 455565 | -3955 | 23181 | AN5762 |
| 230  | CONTIG98 | 459308 | 459732 | 2.88 | 0.00E+00 | transcription_start_site | - | 455399 | 455399 | -4121 | 23182 | AN5762 |
| 230  | CONTIG98 | 459308 | 459732 | 2.88 | 0.00E+00 | transcription_start_site | - | 455184 | 455184 | -4336 | 23183 | AN5762 |
| 230  | CONTIG98 | 459308 | 459732 | 2.88 | 0.00E+00 | transcription_start_site | + | 459095 | 459095 | 425   | 23190 | AN5763 |
| 230  | CONTIG98 | 459308 | 459732 | 2.88 | 0.00E+00 | transcription_start_site | + | 458879 | 458879 | 641   | 23189 | AN5763 |
| 230  | CONTIG98 | 459308 | 459732 | 2.88 | 0.00E+00 | transcription_start_site | + | 458423 | 458423 | 1097  | 23188 | AN5763 |
| 230  | CONTIG98 | 459308 | 459732 | 2.88 | 0.00E+00 | transcription_start_site | + | 459902 | 459902 | -382  | 23191 | AN5764 |
| 230  | CONTIG98 | 459308 | 459732 | 2.88 | 0.00E+00 | transcription_start_site | + | 460036 | 460036 | -516  | 23192 | AN5764 |
| 230  | CONTIG98 | 459308 | 459732 | 2.88 | 0.00E+00 | transcription_start_site | + | 460179 | 460179 | -659  | 23193 | AN5764 |
| 230  | CONTIG98 | 459308 | 459732 | 2.88 | 0.00E+00 | transcription_start_site | + | 461496 | 461496 | -1976 | 23194 | AN5764 |
| 230  | CONTIG98 | 459308 | 459732 | 2.88 | 0.00E+00 | transcription_start_site | + | 463086 | 463086 | -3566 | 23195 | AN5765 |
| 230  | CONTIG98 | 459308 | 459732 | 2.88 | 0.00E+00 | transcription_start_site | + | 463274 | 463274 | -3754 | 23196 | AN5765 |
| 230  | CONTIG98 | 459308 | 459732 | 2.88 | 0.00E+00 | transcription_start_site | + | 463495 | 463495 | -3975 | 23197 | AN5765 |
| 2459 | CONTIG98 | 463518 | 463785 | 1.22 | 1.93E-01 | transcription_start_site | + | 463495 | 463495 | 156   | 23197 | AN5765 |
| 2459 | CONTIG98 | 463518 | 463785 | 1.22 | 1.93E-01 | transcription_start_site | + | 463274 | 463274 | 377   | 23196 | AN5765 |
| 2459 | CONTIG98 | 463518 | 463785 | 1.22 | 1.93E-01 | transcription_start_site | + | 463086 | 463086 | 565   | 23195 | AN5765 |
| 2459 | CONTIG98 | 463518 | 463785 | 1.22 | 1.93E-01 | transcription_start_site | + | 468477 | 468477 | -4825 | 23198 | AN5767 |
| 462  | CONTIG98 | 470562 | 471051 | 2.49 | 0.00E+00 | transcription_start_site | - | 470596 | 470596 | -210  | 23200 | AN5768 |
| 462  | CONTIG98 | 470562 | 471051 | 2.49 | 0.00E+00 | transcription_start_site | - | 470486 | 470486 | -320  | 23201 | AN5768 |
| 462  | CONTIG98 | 470562 | 471051 | 2.49 | 0.00E+00 | transcription_start_site | - | 470351 | 470351 | -455  | 23202 | AN5768 |
| 462  | CONTIG98 | 470562 | 471051 | 2.49 | 0.00E+00 | transcription_start_site | - | 470012 | 470012 | -794  | 23203 | AN5768 |
| 462  | CONTIG98 | 470562 | 471051 | 2.49 | 0.00E+00 | transcription_start_site | - | 469754 | 469754 | -1052 | 23204 | AN5768 |
| 1469 | CONTIG98 | 471527 | 471886 | 1.61 | 5.88E-02 | transcription_start_site | - | 470596 | 470596 | -1110 | 23200 | AN5768 |
| 1469 | CONTIG98 | 471527 | 471886 | 1.61 | 5.88E-02 | transcription_start_site | - | 470486 | 470486 | -1220 | 23201 | AN5768 |
| 1469 | CONTIG98 | 471527 | 471886 | 1.61 | 5.88E-02 | transcription_start_site | - | 470351 | 470351 | -1355 | 23202 | AN5768 |
| 1469 | CONTIG98 | 471527 | 471886 | 1.61 | 5.88E-02 | transcription_start_site | - | 470012 | 470012 | -1694 | 23203 | AN5768 |
| 1469 | CONTIG98 | 471527 | 471886 | 1.61 | 5.88E-02 | transcription_start_site | - | 469754 | 469754 | -1952 | 23204 | AN5768 |
| 462  | CONTIG98 | 470562 | 471051 | 2.49 | 0.00E+00 | transcription_start_site | + | 474607 | 474607 | -3800 | 23205 | AN5770 |
| 462  | CONTIG98 | 470562 | 471051 | 2.49 | 0.00E+00 | transcription_start_site | + | 474736 | 474736 | -3929 | 23206 | AN5770 |
| 462  | CONTIG98 | 470562 | 471051 | 2.49 | 0.00E+00 | transcription_start_site | + | 474855 | 474855 | -4048 | 23207 | AN5770 |
| 1469 | CONTIG98 | 471527 | 471886 | 1.61 | 5.88E-02 | transcription_start_site | + | 474607 | 474607 | -2900 | 23205 | AN5770 |
| 1469 | CONTIG98 | 471527 | 471886 | 1.61 | 5.88E-02 | transcription_start_site | + | 474736 | 474736 | -3029 | 23206 | AN5770 |
| 1469 | CONTIG98 | 471527 | 471886 | 1.61 | 5.88E-02 | transcription_start_site | + | 474855 | 474855 | -3148 | 23207 | AN5770 |
| 2023 | CONTIG98 | 477313 | 477592 | 1.37 | 1.25E-01 | transcription_start_site | - | 476734 | 476734 | -718  | 23208 | AN5771 |
| 255  | CONTIG98 | 500037 | 500526 | 2.83 | 0.00E+00 | transcription_start_site | + | 499778 | 499778 | 503   | 23219 | AN5775 |
| 255  | CONTIG98 | 500037 | 500526 | 2.83 | 0.00E+00 | transcription_start_site | + | 499202 | 499202 | 1079  | 23218 | AN5775 |
| 613  | CONTIG98 | 500567 | 501516 | 2.29 | 0.00E+00 | transcription_start_site | + | 499778 | 499778 | 1263  | 23219 | AN5775 |
| 255  | CONTIG98 | 500037 | 500526 | 2.83 | 0.00E+00 | transcription_start_site | + | 500928 | 500928 | -646  | 23220 | AN5776 |
| 255  | CONTIG98 | 500037 | 500526 | 2.83 | 0.00E+00 | transcription_start_site | + | 503388 | 503388 | -3106 | 23221 | AN5776 |
| 255  | CONTIG98 | 500037 | 500526 | 2.83 | 0.00E+00 | transcription_start_site | + | 504078 | 504078 | -3796 | 23222 | AN5776 |
| 613  | CONTIG98 | 500567 | 501516 | 2.29 | 0.00E+00 | transcription_start_site | + | 500928 | 500928 | 113   | 23220 | AN5776 |
| 613  | CONTIG98 | 500567 | 501516 | 2.29 | 0.00E+00 | transcription_start_site | + | 503388 | 503388 | -2346 | 23221 | AN5776 |
| 613  | CONTIG98 | 500567 | 501516 | 2.29 | 0.00E+00 | transcription_start_site | + | 504078 | 504078 | -3036 | 23222 | AN5776 |
| 1680 | CONTIG98 | 501827 | 502331 | 1.51 | 8.01E-02 | transcription_start_site | + | 500928 | 500928 | 1151  | 23220 | AN5776 |
| 1680 | CONTIG98 | 501827 | 502331 | 1.51 | 8.01E-02 | transcription_start_site | + | 503388 | 503388 | -1309 | 23221 | AN5776 |
| 1680 | CONTIG98 | 501827 | 502331 | 1.51 | 8.01E-02 | transcription_start_site | + | 504078 | 504078 | -1999 | 23222 | AN5776 |
| 2311 | CONTIG98 | 525983 | 526253 | 1.27 | 1.66E-01 | transcription_start_site | - | 522800 | 522800 | -3318 | 23239 | AN5785 |
| 2311 | CONTIG98 | 525983 | 526253 | 1.27 | 1.66E-01 | transcription_start_site | - | 522672 | 522672 | -3446 | 23240 | AN5785 |
| 2311 | CONTIG98 | 525983 | 526253 | 1.27 | 1.66E-01 | transcription_start_site | - | 521978 | 521978 | -4140 | 23241 | AN5785 |
| 2311 | CONTIG98 | 525983 | 526253 | 1.27 | 1.66E-01 | transcription_start_site | + | 525277 | 525277 | 841   | 23245 | AN5786 |

|      |           |        |        |      |          |                          |   |        |        |       |       |        |
|------|-----------|--------|--------|------|----------|--------------------------|---|--------|--------|-------|-------|--------|
| 2311 | CONTIG98  | 525983 | 526253 | 1.27 | 1.66E-01 | transcription_start_site | + | 526094 | 526094 | 24    | 23246 | AN5787 |
| 2311 | CONTIG98  | 525983 | 526253 | 1.27 | 1.66E-01 | transcription_start_site | + | 526236 | 526236 | -118  | 23247 | AN5787 |
| 2311 | CONTIG98  | 525983 | 526253 | 1.27 | 1.66E-01 | transcription_start_site | + | 529768 | 529768 | -3650 | 23248 | AN5787 |
| 1280 | CONTIG98  | 544202 | 544491 | 1.71 | 4.36E-02 | transcription_start_site | + | 547450 | 547450 | -3103 | 23266 | AN5795 |
| 1015 | CONTIG98  | 553371 | 553630 | 1.9  | 2.12E-02 | transcription_start_site | - | 553691 | 553691 | 190   | 23268 | AN5796 |
| 1015 | CONTIG98  | 553371 | 553630 | 1.9  | 2.12E-02 | transcription_start_site | + | 555825 | 555825 | -2324 | 23269 | AN5797 |
| 1015 | CONTIG98  | 553371 | 553630 | 1.9  | 2.12E-02 | transcription_start_site | + | 557171 | 557171 | -3670 | 23270 | AN5797 |
| 1015 | CONTIG98  | 553371 | 553630 | 1.9  | 2.12E-02 | transcription_start_site | + | 558299 | 558299 | -4798 | 23271 | AN5797 |
| 555  | CONTIG100 | 15167  | 15516  | 2.38 | 4.61E-03 | transcription_start_site | - | 14743  | 14743  | -598  | 23296 | AN5803 |
| 555  | CONTIG100 | 15167  | 15516  | 2.38 | 4.61E-03 | transcription_start_site | - | 14630  | 14630  | -711  | 23297 | AN5803 |
| 555  | CONTIG100 | 15167  | 15516  | 2.38 | 4.61E-03 | transcription_start_site | - | 14361  | 14361  | -980  | 23298 | AN5803 |
| 555  | CONTIG100 | 15167  | 15516  | 2.38 | 4.61E-03 | transcription_start_site | - | 13585  | 13585  | -1756 | 23299 | AN5803 |
| 555  | CONTIG100 | 15167  | 15516  | 2.38 | 4.61E-03 | transcription_start_site | - | 12541  | 12541  | -2800 | 23300 | AN5803 |
| 555  | CONTIG100 | 15167  | 15516  | 2.38 | 4.61E-03 | transcription_start_site | + | 15872  | 15872  | -530  | 23301 | AN5804 |
| 555  | CONTIG100 | 15167  | 15516  | 2.38 | 4.61E-03 | transcription_start_site | + | 16696  | 16696  | -1354 | 23302 | AN5804 |
| 555  | CONTIG100 | 15167  | 15516  | 2.38 | 4.61E-03 | transcription_start_site | + | 17359  | 17359  | -2017 | 23303 | AN5804 |
| 555  | CONTIG100 | 15167  | 15516  | 2.38 | 4.61E-03 | transcription_start_site | + | 17922  | 17922  | -2580 | 23304 | AN5804 |
| 555  | CONTIG100 | 15167  | 15516  | 2.38 | 4.61E-03 | transcription_start_site | + | 18062  | 18062  | -2720 | 23305 | AN5804 |
| 555  | CONTIG100 | 15167  | 15516  | 2.38 | 4.61E-03 | transcription_start_site | + | 18589  | 18589  | -3247 | 23306 | AN5804 |
| 1175 | CONTIG100 | 50935  | 51296  | 1.78 | 3.70E-02 | transcription_start_site | - | 48613  | 48613  | -2502 | 23340 | AN5816 |
| 1175 | CONTIG100 | 50935  | 51296  | 1.78 | 3.70E-02 | transcription_start_site | - | 48310  | 48310  | -2805 | 23341 | AN5816 |
| 1175 | CONTIG100 | 50935  | 51296  | 1.78 | 3.70E-02 | transcription_start_site | - | 47985  | 47985  | -3130 | 23342 | AN5816 |
| 1176 | CONTIG100 | 53120  | 53469  | 1.78 | 3.70E-02 | transcription_start_site | - | 48613  | 48613  | -4681 | 23340 | AN5816 |
| 1176 | CONTIG100 | 53120  | 53469  | 1.78 | 3.70E-02 | transcription_start_site | - | 48310  | 48310  | -4984 | 23341 | AN5816 |
| 1175 | CONTIG100 | 50935  | 51296  | 1.78 | 3.70E-02 | transcription_start_site | - | 51266  | 51266  | 150   | 23348 | AN5818 |
| 1175 | CONTIG100 | 50935  | 51296  | 1.78 | 3.70E-02 | transcription_start_site | - | 50748  | 50748  | -367  | 23349 | AN5818 |
| 1176 | CONTIG100 | 53120  | 53469  | 1.78 | 3.70E-02 | transcription_start_site | - | 51266  | 51266  | -2028 | 23348 | AN5818 |
| 1176 | CONTIG100 | 53120  | 53469  | 1.78 | 3.70E-02 | transcription_start_site | - | 50748  | 50748  | -2546 | 23349 | AN5818 |
| 1175 | CONTIG100 | 50935  | 51296  | 1.78 | 3.70E-02 | transcription_start_site | + | 51768  | 51768  | -652  | 23350 | AN5819 |
| 1175 | CONTIG100 | 50935  | 51296  | 1.78 | 3.70E-02 | transcription_start_site | + | 52037  | 52037  | -921  | 23351 | AN5819 |
| 1176 | CONTIG100 | 53120  | 53469  | 1.78 | 3.70E-02 | transcription_start_site | - | 53741  | 53741  | 446   | 23355 | AN5820 |
| 1176 | CONTIG100 | 53120  | 53469  | 1.78 | 3.70E-02 | transcription_start_site | - | 54464  | 54464  | 1169  | 23354 | AN5820 |
| 1176 | CONTIG100 | 53120  | 53469  | 1.78 | 3.70E-02 | transcription_start_site | + | 56969  | 56969  | -3674 | 23356 | AN5821 |
| 1176 | CONTIG100 | 53120  | 53469  | 1.78 | 3.70E-02 | transcription_start_site | + | 57842  | 57842  | -4547 | 23357 | AN5821 |
| 1176 | CONTIG100 | 53120  | 53469  | 1.78 | 3.70E-02 | transcription_start_site | + | 58201  | 58201  | -4906 | 23358 | AN5821 |
| 2392 | CONTIG100 | 63831  | 64120  | 1.24 | 1.93E-01 | transcription_start_site | - | 62773  | 62773  | -1202 | 23359 | AN5822 |
| 2392 | CONTIG100 | 63831  | 64120  | 1.24 | 1.93E-01 | transcription_start_site | - | 60843  | 60843  | -3132 | 23360 | AN5822 |
| 2392 | CONTIG100 | 63831  | 64120  | 1.24 | 1.93E-01 | transcription_start_site | - | 60243  | 60243  | -3732 | 23361 | AN5822 |
| 2392 | CONTIG100 | 63831  | 64120  | 1.24 | 1.93E-01 | transcription_start_site | + | 68439  | 68439  | -4463 | 23362 | AN5823 |
| 1601 | CONTIG100 | 92795  | 93062  | 1.54 | 8.01E-02 | transcription_start_site | - | 91060  | 91060  | -1868 | 23378 | AN5829 |
| 1601 | CONTIG100 | 92795  | 93062  | 1.54 | 8.01E-02 | transcription_start_site | - | 88024  | 88024  | -4904 | 23379 | AN5829 |
| 1601 | CONTIG100 | 92795  | 93062  | 1.54 | 8.01E-02 | transcription_start_site | + | 94174  | 94174  | -1245 | 23380 | AN5830 |
| 1601 | CONTIG100 | 92795  | 93062  | 1.54 | 8.01E-02 | transcription_start_site | + | 95256  | 95256  | -2327 | 23381 | AN5831 |
| 1601 | CONTIG100 | 92795  | 93062  | 1.54 | 8.01E-02 | transcription_start_site | + | 95310  | 95310  | -2381 | 23382 | AN5831 |
| 1601 | CONTIG100 | 92795  | 93062  | 1.54 | 8.01E-02 | transcription_start_site | + | 96261  | 96261  | -3332 | 23383 | AN5831 |
| 2390 | CONTIG100 | 99765  | 100104 | 1.24 | 1.79E-01 | transcription_start_site | + | 100831 | 100831 | -896  | 23384 | AN5832 |
| 2390 | CONTIG100 | 99765  | 100104 | 1.24 | 1.79E-01 | transcription_start_site | + | 100972 | 100972 | -1037 | 23385 | AN5832 |
| 2390 | CONTIG100 | 99765  | 100104 | 1.24 | 1.79E-01 | transcription_start_site | + | 101476 | 101476 | -1541 | 23386 | AN5832 |
| 2390 | CONTIG100 | 99765  | 100104 | 1.24 | 1.79E-01 | transcription_start_site | + | 103177 | 103177 | -3242 | 23387 | AN5833 |
| 2390 | CONTIG100 | 99765  | 100104 | 1.24 | 1.79E-01 | transcription_start_site | + | 103614 | 103614 | -3679 | 23388 | AN5833 |
| 2390 | CONTIG100 | 99765  | 100104 | 1.24 | 1.79E-01 | transcription_start_site | + | 104059 | 104059 | -4124 | 23389 | AN5833 |
| 2390 | CONTIG100 | 99765  | 100104 | 1.24 | 1.79E-01 | transcription_start_site | + | 104987 | 104987 | -5052 | 23390 | AN5833 |
| 1107 | CONTIG100 | 106366 | 106870 | 1.83 | 1.20E-02 | transcription_start_site | - | 106502 | 106502 | -116  | 23391 | AN5834 |
| 1107 | CONTIG100 | 106366 | 106870 | 1.83 | 1.20E-02 | transcription_start_site | - | 106263 | 106263 | -355  | 23392 | AN5834 |
| 1107 | CONTIG100 | 106366 | 106870 | 1.83 | 1.20E-02 | transcription_start_site | - | 106075 | 106075 | -543  | 23393 | AN5834 |
| 1177 | CONTIG100 | 111466 | 111725 | 1.78 | 3.70E-02 | transcription_start_site | - | 106502 | 106502 | -5093 | 23391 | AN5834 |
| 2087 | CONTIG100 | 108921 | 109405 | 1.34 | 1.44E-01 | transcription_start_site | - | 106502 | 106502 | -2661 | 23391 | AN5834 |



|      |           |        |        |      |          |                          |   |        |        |       |       |        |
|------|-----------|--------|--------|------|----------|--------------------------|---|--------|--------|-------|-------|--------|
| 2087 | CONTIG100 | 108921 | 109405 | 1.34 | 1.44E-01 | transcription_start_site | - | 106263 | 106263 | -2900 | 23392 | AN5834 |
| 2087 | CONTIG100 | 108921 | 109405 | 1.34 | 1.44E-01 | transcription_start_site | - | 106075 | 106075 | -3088 | 23393 | AN5834 |
| 2393 | CONTIG100 | 108076 | 108425 | 1.24 | 1.93E-01 | transcription_start_site | - | 106502 | 106502 | -1748 | 23391 | AN5834 |
| 2393 | CONTIG100 | 108076 | 108425 | 1.24 | 1.93E-01 | transcription_start_site | - | 106263 | 106263 | -1987 | 23392 | AN5834 |
| 2393 | CONTIG100 | 108076 | 108425 | 1.24 | 1.93E-01 | transcription_start_site | - | 106075 | 106075 | -2175 | 23393 | AN5834 |
| 439  | CONTIG100 | 119718 | 120140 | 2.53 | 0.00E+00 | transcription_start_site | + | 122060 | 122060 | -2131 | 23394 | AN5836 |
| 439  | CONTIG100 | 119718 | 120140 | 2.53 | 0.00E+00 | transcription_start_site | + | 122379 | 122379 | -2450 | 23395 | AN5836 |
| 439  | CONTIG100 | 119718 | 120140 | 2.53 | 0.00E+00 | transcription_start_site | + | 122621 | 122621 | -2692 | 23396 | AN5836 |
| 439  | CONTIG100 | 119718 | 120140 | 2.53 | 0.00E+00 | transcription_start_site | + | 122800 | 122800 | -2871 | 23397 | AN5836 |
| 929  | CONTIG100 | 120168 | 120802 | 1.98 | 1.84E-02 | transcription_start_site | + | 122060 | 122060 | -1575 | 23394 | AN5836 |
| 929  | CONTIG100 | 120168 | 120802 | 1.98 | 1.84E-02 | transcription_start_site | + | 122379 | 122379 | -1894 | 23395 | AN5836 |
| 929  | CONTIG100 | 120168 | 120802 | 1.98 | 1.84E-02 | transcription_start_site | + | 122621 | 122621 | -2136 | 23396 | AN5836 |
| 929  | CONTIG100 | 120168 | 120802 | 1.98 | 1.84E-02 | transcription_start_site | + | 122800 | 122800 | -2315 | 23397 | AN5836 |
| 2088 | CONTIG100 | 123243 | 123577 | 1.34 | 1.44E-01 | transcription_start_site | + | 122800 | 122800 | 610   | 23397 | AN5836 |
| 2088 | CONTIG100 | 123243 | 123577 | 1.34 | 1.44E-01 | transcription_start_site | + | 122621 | 122621 | 789   | 23396 | AN5836 |
| 2088 | CONTIG100 | 123243 | 123577 | 1.34 | 1.44E-01 | transcription_start_site | + | 122379 | 122379 | 1031  | 23395 | AN5836 |
| 439  | CONTIG100 | 119718 | 120140 | 2.53 | 0.00E+00 | transcription_start_site | + | 124906 | 124906 | -4977 | 23398 | AN5837 |
| 439  | CONTIG100 | 119718 | 120140 | 2.53 | 0.00E+00 | transcription_start_site | + | 125047 | 125047 | -5118 | 23399 | AN5837 |
| 929  | CONTIG100 | 120168 | 120802 | 1.98 | 1.84E-02 | transcription_start_site | + | 124906 | 124906 | -4421 | 23398 | AN5837 |
| 929  | CONTIG100 | 120168 | 120802 | 1.98 | 1.84E-02 | transcription_start_site | + | 125047 | 125047 | -4562 | 23399 | AN5837 |
| 2088 | CONTIG100 | 123243 | 123577 | 1.34 | 1.44E-01 | transcription_start_site | + | 124906 | 124906 | -1496 | 23398 | AN5837 |
| 2088 | CONTIG100 | 123243 | 123577 | 1.34 | 1.44E-01 | transcription_start_site | + | 125047 | 125047 | -1637 | 23399 | AN5837 |
| 2089 | CONTIG100 | 125493 | 125977 | 1.34 | 1.44E-01 | transcription_start_site | + | 125047 | 125047 | 688   | 23399 | AN5837 |
| 2089 | CONTIG100 | 125493 | 125977 | 1.34 | 1.44E-01 | transcription_start_site | + | 124906 | 124906 | 829   | 23398 | AN5837 |
| 2088 | CONTIG100 | 123243 | 123577 | 1.34 | 1.44E-01 | transcription_start_site | + | 127313 | 127313 | -3903 | 23400 | AN5838 |
| 2089 | CONTIG100 | 125493 | 125977 | 1.34 | 1.44E-01 | transcription_start_site | + | 127313 | 127313 | -1578 | 23400 | AN5838 |
| 1317 | CONTIG100 | 154887 | 155170 | 1.68 | 5.22E-02 | transcription_start_site | - | 153888 | 153888 | -1140 | 23418 | AN5843 |
| 1317 | CONTIG100 | 154887 | 155170 | 1.68 | 5.22E-02 | transcription_start_site | - | 153586 | 153586 | -1442 | 23419 | AN5843 |
| 1953 | CONTIG100 | 153832 | 154401 | 1.39 | 1.07E-01 | transcription_start_site | - | 153888 | 153888 | -228  | 23418 | AN5843 |
| 1953 | CONTIG100 | 153832 | 154401 | 1.39 | 1.07E-01 | transcription_start_site | - | 153586 | 153586 | -530  | 23419 | AN5843 |
| 1317 | CONTIG100 | 154887 | 155170 | 1.68 | 5.22E-02 | transcription_start_site | + | 154683 | 154683 | 345   | 23422 | AN5844 |
| 1317 | CONTIG100 | 154887 | 155170 | 1.68 | 5.22E-02 | transcription_start_site | + | 154465 | 154465 | 563   | 23421 | AN5844 |
| 1317 | CONTIG100 | 154887 | 155170 | 1.68 | 5.22E-02 | transcription_start_site | + | 154138 | 154138 | 890   | 23420 | AN5844 |
| 1953 | CONTIG100 | 153832 | 154401 | 1.39 | 1.07E-01 | transcription_start_site | + | 154138 | 154138 | -21   | 23420 | AN5844 |
| 1953 | CONTIG100 | 153832 | 154401 | 1.39 | 1.07E-01 | transcription_start_site | + | 154465 | 154465 | -348  | 23421 | AN5844 |
| 1953 | CONTIG100 | 153832 | 154401 | 1.39 | 1.07E-01 | transcription_start_site | + | 154683 | 154683 | -566  | 23422 | AN5844 |
| 1317 | CONTIG100 | 154887 | 155170 | 1.68 | 5.22E-02 | transcription_start_site | + | 155460 | 155460 | -431  | 23423 | AN5845 |
| 1317 | CONTIG100 | 154887 | 155170 | 1.68 | 5.22E-02 | transcription_start_site | + | 155675 | 155675 | -646  | 23424 | AN5845 |
| 1953 | CONTIG100 | 153832 | 154401 | 1.39 | 1.07E-01 | transcription_start_site | + | 155460 | 155460 | -1343 | 23423 | AN5845 |
| 1953 | CONTIG100 | 153832 | 154401 | 1.39 | 1.07E-01 | transcription_start_site | + | 155675 | 155675 | -1558 | 23424 | AN5845 |
| 1317 | CONTIG100 | 154887 | 155170 | 1.68 | 5.22E-02 | transcription_start_site | + | 156726 | 156726 | -1697 | 23425 | AN5846 |
| 1317 | CONTIG100 | 154887 | 155170 | 1.68 | 5.22E-02 | transcription_start_site | + | 156975 | 156975 | -1946 | 23426 | AN5846 |
| 1317 | CONTIG100 | 154887 | 155170 | 1.68 | 5.22E-02 | transcription_start_site | + | 158217 | 158217 | -3188 | 23427 | AN5846 |
| 1953 | CONTIG100 | 153832 | 154401 | 1.39 | 1.07E-01 | transcription_start_site | + | 156726 | 156726 | -2609 | 23425 | AN5846 |
| 1953 | CONTIG100 | 153832 | 154401 | 1.39 | 1.07E-01 | transcription_start_site | + | 156975 | 156975 | -2858 | 23426 | AN5846 |
| 1953 | CONTIG100 | 153832 | 154401 | 1.39 | 1.07E-01 | transcription_start_site | + | 158217 | 158217 | -4100 | 23427 | AN5846 |
| 661  | CONTIG100 | 160292 | 162282 | 2.23 | 3.31E-03 | transcription_start_site | - | 160265 | 160265 | -1022 | 23428 | AN5847 |
| 661  | CONTIG100 | 160292 | 162282 | 2.23 | 3.31E-03 | transcription_start_site | - | 159892 | 159892 | -1395 | 23429 | AN5847 |
| 661  | CONTIG100 | 160292 | 162282 | 2.23 | 3.31E-03 | transcription_start_site | + | 161237 | 161237 | 50    | 23430 | AN5848 |
| 661  | CONTIG100 | 160292 | 162282 | 2.23 | 3.31E-03 | transcription_start_site | + | 161354 | 161354 | -67   | 23431 | AN5848 |
| 661  | CONTIG100 | 160292 | 162282 | 2.23 | 3.31E-03 | transcription_start_site | + | 162792 | 162792 | -1505 | 23432 | AN5848 |
| 443  | CONTIG100 | 170779 | 171128 | 2.53 | 2.22E-03 | transcription_start_site | + | 173304 | 173304 | -2350 | 23433 | AN5849 |
| 443  | CONTIG100 | 170779 | 171128 | 2.53 | 2.22E-03 | transcription_start_site | + | 174066 | 174066 | -3112 | 23434 | AN5849 |
| 443  | CONTIG100 | 170779 | 171128 | 2.53 | 2.22E-03 | transcription_start_site | + | 174235 | 174235 | -3281 | 23435 | AN5849 |
| 443  | CONTIG100 | 170779 | 171128 | 2.53 | 2.22E-03 | transcription_start_site | + | 175712 | 175712 | -4758 | 23436 | AN5849 |
| 443  | CONTIG100 | 170779 | 171128 | 2.53 | 2.22E-03 | transcription_start_site | + | 175842 | 175842 | -4888 | 23437 | AN5849 |
| 443  | CONTIG100 | 170779 | 171128 | 2.53 | 2.22E-03 | transcription_start_site | + | 176097 | 176097 | -5143 | 23438 | AN5849 |

|                |        |        |      |          |                          |   |        |        |       |       |        |
|----------------|--------|--------|------|----------|--------------------------|---|--------|--------|-------|-------|--------|
| 1602 CONTIG100 | 170119 | 170678 | 1.54 | 8.01E-02 | transcription_start_site | + | 173304 | 173304 | -2905 | 23433 | AN5849 |
| 1602 CONTIG100 | 170119 | 170678 | 1.54 | 8.01E-02 | transcription_start_site | + | 174066 | 174066 | -3667 | 23434 | AN5849 |
| 1602 CONTIG100 | 170119 | 170678 | 1.54 | 8.01E-02 | transcription_start_site | + | 174235 | 174235 | -3836 | 23435 | AN5849 |
| 1730 CONTIG100 | 173187 | 173616 | 1.49 | 9.24E-02 | transcription_start_site | + | 173304 | 173304 | 97    | 23433 | AN5849 |
| 1730 CONTIG100 | 173187 | 173616 | 1.49 | 9.24E-02 | transcription_start_site | + | 174066 | 174066 | -664  | 23434 | AN5849 |
| 1730 CONTIG100 | 173187 | 173616 | 1.49 | 9.24E-02 | transcription_start_site | + | 174235 | 174235 | -833  | 23435 | AN5849 |
| 1730 CONTIG100 | 173187 | 173616 | 1.49 | 9.24E-02 | transcription_start_site | + | 175712 | 175712 | -2310 | 23436 | AN5849 |
| 1730 CONTIG100 | 173187 | 173616 | 1.49 | 9.24E-02 | transcription_start_site | + | 175842 | 175842 | -2440 | 23437 | AN5849 |
| 1730 CONTIG100 | 173187 | 173616 | 1.49 | 9.24E-02 | transcription_start_site | + | 176097 | 176097 | -2695 | 23438 | AN5849 |
| 1730 CONTIG100 | 173187 | 173616 | 1.49 | 9.24E-02 | transcription_start_site | + | 176649 | 176649 | -3247 | 23439 | AN5849 |
| 1955 CONTIG100 | 171837 | 172709 | 1.39 | 1.25E-01 | transcription_start_site | + | 173304 | 173304 | -1031 | 23433 | AN5849 |
| 1955 CONTIG100 | 171837 | 172709 | 1.39 | 1.25E-01 | transcription_start_site | + | 174066 | 174066 | -1793 | 23434 | AN5849 |
| 1955 CONTIG100 | 171837 | 172709 | 1.39 | 1.25E-01 | transcription_start_site | + | 174235 | 174235 | -1962 | 23435 | AN5849 |
| 1955 CONTIG100 | 171837 | 172709 | 1.39 | 1.25E-01 | transcription_start_site | + | 175712 | 175712 | -3439 | 23436 | AN5849 |
| 1955 CONTIG100 | 171837 | 172709 | 1.39 | 1.25E-01 | transcription_start_site | + | 175842 | 175842 | -3569 | 23437 | AN5849 |
| 1955 CONTIG100 | 171837 | 172709 | 1.39 | 1.25E-01 | transcription_start_site | + | 176097 | 176097 | -3824 | 23438 | AN5849 |
| 1955 CONTIG100 | 171837 | 172709 | 1.39 | 1.25E-01 | transcription_start_site | + | 176649 | 176649 | -4376 | 23439 | AN5849 |
| 1730 CONTIG100 | 173187 | 173616 | 1.49 | 9.24E-02 | transcription_start_site | + | 177740 | 177740 | -4338 | 23440 | AN5850 |
| 1730 CONTIG100 | 173187 | 173616 | 1.49 | 9.24E-02 | transcription_start_site | + | 177820 | 177820 | -4418 | 23441 | AN5850 |
| 354 CONTIG100  | 194927 | 195366 | 2.67 | 0.00E+00 | transcription_start_site | + | 198112 | 198112 | -2965 | 23442 | AN5852 |
| 354 CONTIG100  | 194927 | 195366 | 2.67 | 0.00E+00 | transcription_start_site | + | 198598 | 198598 | -3451 | 23443 | AN5852 |
| 53 CONTIG100   | 204917 | 205191 | 3.42 | 0.00E+00 | transcription_start_site | - | 201180 | 201180 | -3874 | 23444 | AN5853 |
| 53 CONTIG100   | 204917 | 205191 | 3.42 | 0.00E+00 | transcription_start_site | - | 200674 | 200674 | -4380 | 23445 | AN5853 |
| 53 CONTIG100   | 204917 | 205191 | 3.42 | 0.00E+00 | transcription_start_site | - | 200614 | 200614 | -4440 | 23446 | AN5853 |
| 53 CONTIG100   | 204917 | 205191 | 3.42 | 0.00E+00 | transcription_start_site | - | 200313 | 200313 | -4741 | 23447 | AN5853 |
| 53 CONTIG100   | 204917 | 205191 | 3.42 | 0.00E+00 | transcription_start_site | - | 200117 | 200117 | -4937 | 23448 | AN5853 |
| 53 CONTIG100   | 204917 | 205191 | 3.42 | 0.00E+00 | transcription_start_site | - | 199952 | 199952 | -5102 | 23449 | AN5853 |
| 2234 CONTIG100 | 203552 | 204202 | 1.29 | 1.50E-01 | transcription_start_site | - | 201180 | 201180 | -2697 | 23444 | AN5853 |
| 2234 CONTIG100 | 203552 | 204202 | 1.29 | 1.50E-01 | transcription_start_site | - | 200674 | 200674 | -3203 | 23445 | AN5853 |
| 2234 CONTIG100 | 203552 | 204202 | 1.29 | 1.50E-01 | transcription_start_site | - | 200614 | 200614 | -3263 | 23446 | AN5853 |
| 2234 CONTIG100 | 203552 | 204202 | 1.29 | 1.50E-01 | transcription_start_site | - | 200313 | 200313 | -3564 | 23447 | AN5853 |
| 2234 CONTIG100 | 203552 | 204202 | 1.29 | 1.50E-01 | transcription_start_site | - | 200117 | 200117 | -3760 | 23448 | AN5853 |
| 2234 CONTIG100 | 203552 | 204202 | 1.29 | 1.50E-01 | transcription_start_site | - | 199952 | 199952 | -3925 | 23449 | AN5853 |
| 2234 CONTIG100 | 203552 | 204202 | 1.29 | 1.50E-01 | transcription_start_site | - | 199756 | 199756 | -4121 | 23450 | AN5853 |
| 2234 CONTIG100 | 203552 | 204202 | 1.29 | 1.50E-01 | transcription_start_site | - | 199450 | 199450 | -4427 | 23451 | AN5853 |
| 53 CONTIG100   | 204917 | 205191 | 3.42 | 0.00E+00 | transcription_start_site | - | 204755 | 204755 | -299  | 23455 | AN5855 |
| 53 CONTIG100   | 204917 | 205191 | 3.42 | 0.00E+00 | transcription_start_site | - | 204591 | 204591 | -463  | 23456 | AN5855 |
| 2234 CONTIG100 | 203552 | 204202 | 1.29 | 1.50E-01 | transcription_start_site | - | 204591 | 204591 | 714   | 23456 | AN5855 |
| 2234 CONTIG100 | 203552 | 204202 | 1.29 | 1.50E-01 | transcription_start_site | - | 204755 | 204755 | 878   | 23455 | AN5855 |
| 53 CONTIG100   | 204917 | 205191 | 3.42 | 0.00E+00 | transcription_start_site | + | 206946 | 206946 | -1892 | 23457 | AN5856 |
| 53 CONTIG100   | 204917 | 205191 | 3.42 | 0.00E+00 | transcription_start_site | + | 207388 | 207388 | -2334 | 23458 | AN5856 |
| 53 CONTIG100   | 204917 | 205191 | 3.42 | 0.00E+00 | transcription_start_site | + | 209397 | 209397 | -4343 | 23459 | AN5856 |
| 53 CONTIG100   | 204917 | 205191 | 3.42 | 0.00E+00 | transcription_start_site | + | 209656 | 209656 | -4602 | 23460 | AN5856 |
| 1833 CONTIG100 | 210002 | 210741 | 1.44 | 9.26E-02 | transcription_start_site | + | 209656 | 209656 | 715   | 23460 | AN5856 |
| 1833 CONTIG100 | 210002 | 210741 | 1.44 | 9.26E-02 | transcription_start_site | + | 209397 | 209397 | 974   | 23459 | AN5856 |
| 2234 CONTIG100 | 203552 | 204202 | 1.29 | 1.50E-01 | transcription_start_site | + | 206946 | 206946 | -3069 | 23457 | AN5856 |
| 2234 CONTIG100 | 203552 | 204202 | 1.29 | 1.50E-01 | transcription_start_site | + | 207388 | 207388 | -3511 | 23458 | AN5856 |
| 1833 CONTIG100 | 210002 | 210741 | 1.44 | 9.26E-02 | transcription_start_site | + | 211293 | 211293 | -921  | 23461 | AN5857 |
| 142 CONTIG100  | 218628 | 218987 | 3.07 | 2.67E-04 | transcription_start_site | + | 220655 | 220655 | -1847 | 23462 | AN5859 |
| 142 CONTIG100  | 218628 | 218987 | 3.07 | 2.67E-04 | transcription_start_site | + | 221131 | 221131 | -2323 | 23463 | AN5859 |
| 142 CONTIG100  | 218628 | 218987 | 3.07 | 2.67E-04 | transcription_start_site | + | 221429 | 221429 | -2621 | 23464 | AN5859 |
| 975 CONTIG100  | 219528 | 220192 | 1.93 | 1.06E-02 | transcription_start_site | + | 220655 | 220655 | -795  | 23462 | AN5859 |
| 975 CONTIG100  | 219528 | 220192 | 1.93 | 1.06E-02 | transcription_start_site | + | 221131 | 221131 | -1271 | 23463 | AN5859 |
| 975 CONTIG100  | 219528 | 220192 | 1.93 | 1.06E-02 | transcription_start_site | + | 221429 | 221429 | -1569 | 23464 | AN5859 |
| 2238 CONTIG100 | 215868 | 216362 | 1.29 | 1.66E-01 | transcription_start_site | + | 220655 | 220655 | -4540 | 23462 | AN5859 |
| 2238 CONTIG100 | 215868 | 216362 | 1.29 | 1.66E-01 | transcription_start_site | + | 221131 | 221131 | -5016 | 23463 | AN5859 |
| 2391 CONTIG100 | 216463 | 217112 | 1.24 | 1.79E-01 | transcription_start_site | + | 220655 | 220655 | -3867 | 23462 | AN5859 |

|      |           |        |        |      |          |                          |   |        |        |       |       |        |
|------|-----------|--------|--------|------|----------|--------------------------|---|--------|--------|-------|-------|--------|
| 2391 | CONTIG100 | 216463 | 217112 | 1.24 | 1.79E-01 | transcription_start_site | + | 221131 | 221131 | -4343 | 23463 | AN5859 |
| 2391 | CONTIG100 | 216463 | 217112 | 1.24 | 1.79E-01 | transcription_start_site | + | 221429 | 221429 | -4641 | 23464 | AN5859 |
| 263  | CONTIG100 | 250746 | 251231 | 2.82 | 0.00E+00 | transcription_start_site | + | 255700 | 255700 | -4711 | 23504 | AN5871 |
| 263  | CONTIG100 | 250746 | 251231 | 2.82 | 0.00E+00 | transcription_start_site | + | 256208 | 256208 | -5219 | 23505 | AN5871 |
| 1245 | CONTIG100 | 262221 | 262705 | 1.73 | 2.64E-02 | transcription_start_site | - | 258584 | 258584 | -3879 | 23507 | AN5872 |
| 1245 | CONTIG100 | 262221 | 262705 | 1.73 | 2.64E-02 | transcription_start_site | - | 258506 | 258506 | -3957 | 23508 | AN5872 |
| 1245 | CONTIG100 | 262221 | 262705 | 1.73 | 2.64E-02 | transcription_start_site | - | 258427 | 258427 | -4036 | 23509 | AN5872 |
| 1245 | CONTIG100 | 262221 | 262705 | 1.73 | 2.64E-02 | transcription_start_site | - | 258229 | 258229 | -4234 | 23510 | AN5872 |
| 1245 | CONTIG100 | 262221 | 262705 | 1.73 | 2.64E-02 | transcription_start_site | - | 257775 | 257775 | -4688 | 23511 | AN5872 |
| 1245 | CONTIG100 | 262221 | 262705 | 1.73 | 2.64E-02 | transcription_start_site | + | 261647 | 261647 | 816   | 23515 | AN5873 |
| 1245 | CONTIG100 | 262221 | 262705 | 1.73 | 2.64E-02 | transcription_start_site | + | 261363 | 261363 | 1100  | 23514 | AN5873 |
| 1245 | CONTIG100 | 262221 | 262705 | 1.73 | 2.64E-02 | transcription_start_site | + | 264477 | 264477 | -2014 | 23516 | AN5874 |
| 1245 | CONTIG100 | 262221 | 262705 | 1.73 | 2.64E-02 | transcription_start_site | + | 264799 | 264799 | -2336 | 23517 | AN5874 |
| 1245 | CONTIG100 | 262221 | 262705 | 1.73 | 2.64E-02 | transcription_start_site | + | 265006 | 265006 | -2543 | 23518 | AN5874 |
| 1245 | CONTIG100 | 262221 | 262705 | 1.73 | 2.64E-02 | transcription_start_site | + | 265233 | 265233 | -2770 | 23519 | AN5874 |
| 1245 | CONTIG100 | 262221 | 262705 | 1.73 | 2.64E-02 | transcription_start_site | + | 265477 | 265477 | -3014 | 23520 | AN5874 |
| 1245 | CONTIG100 | 262221 | 262705 | 1.73 | 2.64E-02 | transcription_start_site | + | 265672 | 265672 | -3209 | 23521 | AN5874 |
| 1318 | CONTIG100 | 291014 | 291301 | 1.68 | 5.22E-02 | transcription_start_site | - | 287164 | 287164 | -3993 | 23551 | AN5883 |
| 1318 | CONTIG100 | 291014 | 291301 | 1.68 | 5.22E-02 | transcription_start_site | - | 286289 | 286289 | -4868 | 23552 | AN5883 |
| 1111 | CONTIG100 | 301966 | 302240 | 1.83 | 3.08E-02 | transcription_start_site | + | 300993 | 300993 | 1110  | 23561 | AN5885 |
| 1318 | CONTIG100 | 291014 | 291301 | 1.68 | 5.22E-02 | transcription_start_site | + | 293102 | 293102 | -1944 | 23555 | AN5885 |
| 1318 | CONTIG100 | 291014 | 291301 | 1.68 | 5.22E-02 | transcription_start_site | + | 293511 | 293511 | -2353 | 23556 | AN5885 |
| 1318 | CONTIG100 | 291014 | 291301 | 1.68 | 5.22E-02 | transcription_start_site | + | 293739 | 293739 | -2581 | 23557 | AN5885 |
| 1318 | CONTIG100 | 291014 | 291301 | 1.68 | 5.22E-02 | transcription_start_site | + | 294236 | 294236 | -3078 | 23558 | AN5885 |
| 512  | CONTIG100 | 319514 | 319793 | 2.43 | 3.61E-03 | transcription_start_site | + | 319392 | 319392 | 261   | 23577 | AN5892 |
| 294  | CONTIG100 | 325515 | 326019 | 2.77 | 9.51E-04 | transcription_start_site | + | 329870 | 329870 | -4103 | 23578 | AN5893 |
| 294  | CONTIG100 | 325515 | 326019 | 2.77 | 9.51E-04 | transcription_start_site | + | 330638 | 330638 | -4871 | 23579 | AN5893 |
| 356  | CONTIG100 | 328817 | 329076 | 2.67 | 1.22E-03 | transcription_start_site | + | 329870 | 329870 | -923  | 23578 | AN5893 |
| 356  | CONTIG100 | 328817 | 329076 | 2.67 | 1.22E-03 | transcription_start_site | + | 330638 | 330638 | -1691 | 23579 | AN5893 |
| 356  | CONTIG100 | 328817 | 329076 | 2.67 | 1.22E-03 | transcription_start_site | + | 331827 | 331827 | -2880 | 23580 | AN5893 |
| 356  | CONTIG100 | 328817 | 329076 | 2.67 | 1.22E-03 | transcription_start_site | + | 332066 | 332066 | -3119 | 23581 | AN5893 |
| 2086 | CONTIG100 | 329795 | 330439 | 1.34 | 1.28E-01 | transcription_start_site | + | 329870 | 329870 | 247   | 23578 | AN5893 |
| 2086 | CONTIG100 | 329795 | 330439 | 1.34 | 1.28E-01 | transcription_start_site | + | 330638 | 330638 | -521  | 23579 | AN5893 |
| 2086 | CONTIG100 | 329795 | 330439 | 1.34 | 1.28E-01 | transcription_start_site | + | 331827 | 331827 | -1710 | 23580 | AN5893 |
| 2086 | CONTIG100 | 329795 | 330439 | 1.34 | 1.28E-01 | transcription_start_site | + | 332066 | 332066 | -1949 | 23581 | AN5893 |
| 1246 | CONTIG100 | 333760 | 334104 | 1.73 | 2.64E-02 | transcription_start_site | - | 334167 | 334167 | 235   | 23583 | AN5894 |
| 1246 | CONTIG100 | 333760 | 334104 | 1.73 | 2.64E-02 | transcription_start_site | - | 334994 | 334994 | 1062  | 23582 | AN5894 |
| 2640 | CONTIG101 | 4807   | 5151   | 1.15 | 1.93E-01 | transcription_start_site | - | 2496   | 2496   | -2483 | 23584 | AN5895 |
| 2640 | CONTIG101 | 4807   | 5151   | 1.15 | 1.93E-01 | transcription_start_site | - | 2392   | 2392   | -2587 | 23585 | AN5895 |
| 2640 | CONTIG101 | 4807   | 5151   | 1.15 | 1.93E-01 | transcription_start_site | - | 2304   | 2304   | -2675 | 23586 | AN5895 |
| 2640 | CONTIG101 | 4807   | 5151   | 1.15 | 1.93E-01 | transcription_start_site | - | 2189   | 2189   | -2790 | 23587 | AN5895 |
| 2640 | CONTIG101 | 4807   | 5151   | 1.15 | 1.93E-01 | transcription_start_site | - | 2105   | 2105   | -2874 | 23588 | AN5895 |
| 2640 | CONTIG101 | 4807   | 5151   | 1.15 | 1.93E-01 | transcription_start_site | - | 1714   | 1714   | -3265 | 23589 | AN5895 |
| 2640 | CONTIG101 | 4807   | 5151   | 1.15 | 1.93E-01 | transcription_start_site | - | 843    | 843    | -4136 | 23590 | AN5895 |
| 2640 | CONTIG101 | 4807   | 5151   | 1.15 | 1.93E-01 | transcription_start_site | - | 4902   | 4902   | -77   | 23592 | AN5897 |
| 2640 | CONTIG101 | 4807   | 5151   | 1.15 | 1.93E-01 | transcription_start_site | - | 4479   | 4479   | -500  | 23593 | AN5897 |
| 2640 | CONTIG101 | 4807   | 5151   | 1.15 | 1.93E-01 | transcription_start_site | + | 5575   | 5575   | -596  | 23594 | AN5898 |
| 2640 | CONTIG101 | 4807   | 5151   | 1.15 | 1.93E-01 | transcription_start_site | + | 5919   | 5919   | -940  | 23595 | AN5898 |
| 2640 | CONTIG101 | 4807   | 5151   | 1.15 | 1.93E-01 | transcription_start_site | + | 6100   | 6100   | -1121 | 23596 | AN5898 |
| 2640 | CONTIG101 | 4807   | 5151   | 1.15 | 1.93E-01 | transcription_start_site | + | 6318   | 6318   | -1339 | 23597 | AN5898 |
| 2640 | CONTIG101 | 4807   | 5151   | 1.15 | 1.93E-01 | transcription_start_site | + | 6894   | 6894   | -1915 | 23598 | AN5898 |
| 2640 | CONTIG101 | 4807   | 5151   | 1.15 | 1.93E-01 | transcription_start_site | + | 7414   | 7414   | -2435 | 23599 | AN5898 |
| 2640 | CONTIG101 | 4807   | 5151   | 1.15 | 1.93E-01 | transcription_start_site | + | 7660   | 7660   | -2681 | 23600 | AN5898 |
| 2640 | CONTIG101 | 4807   | 5151   | 1.15 | 1.93E-01 | transcription_start_site | + | 9507   | 9507   | -4528 | 23601 | AN5899 |
| 2640 | CONTIG101 | 4807   | 5151   | 1.15 | 1.93E-01 | transcription_start_site | + | 9599   | 9599   | -4620 | 23602 | AN5899 |
| 2640 | CONTIG101 | 4807   | 5151   | 1.15 | 1.93E-01 | transcription_start_site | + | 9721   | 9721   | -4742 | 23603 | AN5899 |
| 2223 | CONTIG101 | 14043  | 14392  | 1.29 | 1.25E-01 | transcription_start_site | + | 14293  | 14293  | -75   | 23607 | AN5900 |

|      |           |       |       |      |          |                          |   |       |       |       |       |        |
|------|-----------|-------|-------|------|----------|--------------------------|---|-------|-------|-------|-------|--------|
| 2223 | CONTIG101 | 14043 | 14392 | 1.29 | 1.25E-01 | transcription_start_site | + | 13909 | 13909 | 308   | 23606 | AN5900 |
| 928  | CONTIG101 | 15318 | 15801 | 1.98 | 1.11E-02 | transcription_start_site | - | 15858 | 15858 | 298   | 23609 | AN5901 |
| 928  | CONTIG101 | 15318 | 15801 | 1.98 | 1.11E-02 | transcription_start_site | - | 15211 | 15211 | -348  | 23610 | AN5901 |
| 928  | CONTIG101 | 15318 | 15801 | 1.98 | 1.11E-02 | transcription_start_site | - | 15964 | 15964 | 404   | 23608 | AN5901 |
| 2223 | CONTIG101 | 14043 | 14392 | 1.29 | 1.25E-01 | transcription_start_site | - | 15211 | 15211 | 993   | 23610 | AN5901 |
| 928  | CONTIG101 | 15318 | 15801 | 1.98 | 1.11E-02 | transcription_start_site | + | 16282 | 16282 | -722  | 23611 | AN5902 |
| 928  | CONTIG101 | 15318 | 15801 | 1.98 | 1.11E-02 | transcription_start_site | + | 17083 | 17083 | -1523 | 23612 | AN5902 |
| 2223 | CONTIG101 | 14043 | 14392 | 1.29 | 1.25E-01 | transcription_start_site | + | 16282 | 16282 | -2064 | 23611 | AN5902 |
| 2223 | CONTIG101 | 14043 | 14392 | 1.29 | 1.25E-01 | transcription_start_site | + | 17083 | 17083 | -2865 | 23612 | AN5902 |
| 928  | CONTIG101 | 15318 | 15801 | 1.98 | 1.11E-02 | transcription_start_site | + | 18508 | 18508 | -2948 | 23613 | AN5903 |
| 928  | CONTIG101 | 15318 | 15801 | 1.98 | 1.11E-02 | transcription_start_site | + | 19062 | 19062 | -3502 | 23614 | AN5903 |
| 928  | CONTIG101 | 15318 | 15801 | 1.98 | 1.11E-02 | transcription_start_site | + | 19223 | 19223 | -3663 | 23615 | AN5903 |
| 928  | CONTIG101 | 15318 | 15801 | 1.98 | 1.11E-02 | transcription_start_site | + | 19688 | 19688 | -4128 | 23616 | AN5903 |
| 928  | CONTIG101 | 15318 | 15801 | 1.98 | 1.11E-02 | transcription_start_site | + | 20440 | 20440 | -4880 | 23617 | AN5903 |
| 2223 | CONTIG101 | 14043 | 14392 | 1.29 | 1.25E-01 | transcription_start_site | + | 18508 | 18508 | -4290 | 23613 | AN5903 |
| 2223 | CONTIG101 | 14043 | 14392 | 1.29 | 1.25E-01 | transcription_start_site | + | 19062 | 19062 | -4844 | 23614 | AN5903 |
| 2223 | CONTIG101 | 14043 | 14392 | 1.29 | 1.25E-01 | transcription_start_site | + | 19223 | 19223 | -5005 | 23615 | AN5903 |
| 469  | CONTIG101 | 29405 | 29689 | 2.48 | 1.22E-03 | transcription_start_site | - | 27205 | 27205 | -2342 | 23626 | AN5906 |
| 469  | CONTIG101 | 29405 | 29689 | 2.48 | 1.22E-03 | transcription_start_site | - | 27050 | 27050 | -2497 | 23627 | AN5906 |
| 469  | CONTIG101 | 29405 | 29689 | 2.48 | 1.22E-03 | transcription_start_site | - | 26436 | 26436 | -3111 | 23628 | AN5906 |
| 469  | CONTIG101 | 29405 | 29689 | 2.48 | 1.22E-03 | transcription_start_site | - | 28619 | 28619 | -928  | 23629 | AN5907 |
| 469  | CONTIG101 | 29405 | 29689 | 2.48 | 1.22E-03 | transcription_start_site | + | 30450 | 30450 | -903  | 23630 | AN5908 |
| 1771 | CONTIG101 | 55809 | 56238 | 1.47 | 5.05E-02 | transcription_start_site | - | 52385 | 52385 | -3638 | 23671 | AN5917 |
| 1771 | CONTIG101 | 55809 | 56238 | 1.47 | 5.05E-02 | transcription_start_site | - | 52009 | 52009 | -4014 | 23672 | AN5917 |
| 1771 | CONTIG101 | 55809 | 56238 | 1.47 | 5.05E-02 | transcription_start_site | + | 55191 | 55191 | 832   | 23675 | AN5918 |
| 1771 | CONTIG101 | 55809 | 56238 | 1.47 | 5.05E-02 | transcription_start_site | + | 55091 | 55091 | 932   | 23674 | AN5918 |
| 1771 | CONTIG101 | 55809 | 56238 | 1.47 | 5.05E-02 | transcription_start_site | + | 55016 | 55016 | 1007  | 23673 | AN5918 |
| 1771 | CONTIG101 | 55809 | 56238 | 1.47 | 5.05E-02 | transcription_start_site | + | 59301 | 59301 | -3277 | 23678 | AN5920 |
| 1771 | CONTIG101 | 55809 | 56238 | 1.47 | 5.05E-02 | transcription_start_site | + | 59672 | 59672 | -3648 | 23679 | AN5920 |
| 2224 | CONTIG101 | 65928 | 66277 | 1.29 | 1.25E-01 | transcription_start_site | - | 65545 | 65545 | -557  | 23680 | AN5921 |
| 2224 | CONTIG101 | 65928 | 66277 | 1.29 | 1.25E-01 | transcription_start_site | - | 65193 | 65193 | -909  | 23681 | AN5921 |
| 2224 | CONTIG101 | 65928 | 66277 | 1.29 | 1.25E-01 | transcription_start_site | - | 64033 | 64033 | -2069 | 23682 | AN5921 |
| 2224 | CONTIG101 | 65928 | 66277 | 1.29 | 1.25E-01 | transcription_start_site | - | 63752 | 63752 | -2350 | 23683 | AN5921 |
| 1462 | CONTIG101 | 88804 | 89078 | 1.61 | 4.36E-02 | transcription_start_site | - | 85207 | 85207 | -3734 | 23689 | AN5926 |
| 1462 | CONTIG101 | 88804 | 89078 | 1.61 | 4.36E-02 | transcription_start_site | - | 85051 | 85051 | -3890 | 23690 | AN5926 |
| 1462 | CONTIG101 | 88804 | 89078 | 1.61 | 4.36E-02 | transcription_start_site | - | 84576 | 84576 | -4365 | 23691 | AN5926 |
| 1462 | CONTIG101 | 88804 | 89078 | 1.61 | 4.36E-02 | transcription_start_site | - | 84362 | 84362 | -4579 | 23692 | AN5926 |
| 219  | CONTIG101 | 92644 | 93063 | 2.9  | 0.00E+00 | transcription_start_site | - | 88250 | 88250 | -4603 | 23693 | AN5927 |
| 1462 | CONTIG101 | 88804 | 89078 | 1.61 | 4.36E-02 | transcription_start_site | - | 88250 | 88250 | -691  | 23693 | AN5927 |
| 1462 | CONTIG101 | 88804 | 89078 | 1.61 | 4.36E-02 | transcription_start_site | - | 87561 | 87561 | -1380 | 23694 | AN5927 |
| 1547 | CONTIG101 | 91284 | 91928 | 1.56 | 3.33E-02 | transcription_start_site | - | 88250 | 88250 | -3356 | 23693 | AN5927 |
| 1547 | CONTIG101 | 91284 | 91928 | 1.56 | 3.33E-02 | transcription_start_site | - | 87561 | 87561 | -4045 | 23694 | AN5927 |
| 2641 | CONTIG101 | 90384 | 90668 | 1.15 | 1.93E-01 | transcription_start_site | - | 88250 | 88250 | -2276 | 23693 | AN5927 |
| 2641 | CONTIG101 | 90384 | 90668 | 1.15 | 1.93E-01 | transcription_start_site | - | 87561 | 87561 | -2965 | 23694 | AN5927 |
| 1462 | CONTIG101 | 88804 | 89078 | 1.61 | 4.36E-02 | transcription_start_site | + | 88843 | 88843 | 98    | 23696 | AN5928 |
| 1462 | CONTIG101 | 88804 | 89078 | 1.61 | 4.36E-02 | transcription_start_site | + | 88763 | 88763 | 178   | 23695 | AN5928 |
| 1462 | CONTIG101 | 88804 | 89078 | 1.61 | 4.36E-02 | transcription_start_site | + | 89183 | 89183 | -242  | 23697 | AN5928 |
| 1462 | CONTIG101 | 88804 | 89078 | 1.61 | 4.36E-02 | transcription_start_site | + | 89269 | 89269 | -328  | 23698 | AN5928 |
| 219  | CONTIG101 | 92644 | 93063 | 2.9  | 0.00E+00 | transcription_start_site | - | 91881 | 91881 | -972  | 23699 | AN5929 |
| 219  | CONTIG101 | 92644 | 93063 | 2.9  | 0.00E+00 | transcription_start_site | - | 91448 | 91448 | -1405 | 23700 | AN5929 |
| 219  | CONTIG101 | 92644 | 93063 | 2.9  | 0.00E+00 | transcription_start_site | - | 91018 | 91018 | -1835 | 23701 | AN5929 |
| 219  | CONTIG101 | 92644 | 93063 | 2.9  | 0.00E+00 | transcription_start_site | - | 90658 | 90658 | -2195 | 23702 | AN5929 |
| 219  | CONTIG101 | 92644 | 93063 | 2.9  | 0.00E+00 | transcription_start_site | - | 90280 | 90280 | -2573 | 23703 | AN5929 |
| 219  | CONTIG101 | 92644 | 93063 | 2.9  | 0.00E+00 | transcription_start_site | - | 90163 | 90163 | -2690 | 23704 | AN5929 |
| 977  | CONTIG101 | 96241 | 96651 | 1.93 | 1.30E-02 | transcription_start_site | - | 91881 | 91881 | -4565 | 23699 | AN5929 |
| 977  | CONTIG101 | 96241 | 96651 | 1.93 | 1.30E-02 | transcription_start_site | - | 91448 | 91448 | -4998 | 23700 | AN5929 |
| 1547 | CONTIG101 | 91284 | 91928 | 1.56 | 3.33E-02 | transcription_start_site | - | 91448 | 91448 | -158  | 23700 | AN5929 |

|      |           |        |        |      |          |                          |   |        |        |       |       |        |
|------|-----------|--------|--------|------|----------|--------------------------|---|--------|--------|-------|-------|--------|
| 1547 | CONTIG101 | 91284  | 91928  | 1.56 | 3.33E-02 | transcription_start_site | - | 91881  | 91881  | 275   | 23699 | AN5929 |
| 1547 | CONTIG101 | 91284  | 91928  | 1.56 | 3.33E-02 | transcription_start_site | - | 91018  | 91018  | -588  | 23701 | AN5929 |
| 1547 | CONTIG101 | 91284  | 91928  | 1.56 | 3.33E-02 | transcription_start_site | - | 90658  | 90658  | -948  | 23702 | AN5929 |
| 1547 | CONTIG101 | 91284  | 91928  | 1.56 | 3.33E-02 | transcription_start_site | - | 90280  | 90280  | -1326 | 23703 | AN5929 |
| 1547 | CONTIG101 | 91284  | 91928  | 1.56 | 3.33E-02 | transcription_start_site | - | 90163  | 90163  | -1443 | 23704 | AN5929 |
| 2641 | CONTIG101 | 90384  | 90668  | 1.15 | 1.93E-01 | transcription_start_site | - | 90658  | 90658  | 132   | 23702 | AN5929 |
| 2641 | CONTIG101 | 90384  | 90668  | 1.15 | 1.93E-01 | transcription_start_site | - | 90280  | 90280  | -246  | 23703 | AN5929 |
| 2641 | CONTIG101 | 90384  | 90668  | 1.15 | 1.93E-01 | transcription_start_site | - | 90163  | 90163  | -363  | 23704 | AN5929 |
| 2641 | CONTIG101 | 90384  | 90668  | 1.15 | 1.93E-01 | transcription_start_site | - | 91018  | 91018  | 492   | 23701 | AN5929 |
| 2641 | CONTIG101 | 90384  | 90668  | 1.15 | 1.93E-01 | transcription_start_site | - | 91448  | 91448  | 922   | 23700 | AN5929 |
| 219  | CONTIG101 | 92644  | 93063  | 2.9  | 0.00E+00 | transcription_start_site | + | 97469  | 97469  | -4615 | 23705 | AN5930 |
| 219  | CONTIG101 | 92644  | 93063  | 2.9  | 0.00E+00 | transcription_start_site | + | 97681  | 97681  | -4827 | 23706 | AN5930 |
| 219  | CONTIG101 | 92644  | 93063  | 2.9  | 0.00E+00 | transcription_start_site | + | 97872  | 97872  | -5018 | 23707 | AN5930 |
| 977  | CONTIG101 | 96241  | 96651  | 1.93 | 1.30E-02 | transcription_start_site | + | 97469  | 97469  | -1023 | 23705 | AN5930 |
| 977  | CONTIG101 | 96241  | 96651  | 1.93 | 1.30E-02 | transcription_start_site | + | 97681  | 97681  | -1235 | 23706 | AN5930 |
| 977  | CONTIG101 | 96241  | 96651  | 1.93 | 1.30E-02 | transcription_start_site | + | 97872  | 97872  | -1426 | 23707 | AN5930 |
| 977  | CONTIG101 | 96241  | 96651  | 1.93 | 1.30E-02 | transcription_start_site | + | 98104  | 98104  | -1658 | 23708 | AN5930 |
| 2516 | CONTIG101 | 102154 | 102441 | 1.2  | 1.66E-01 | transcription_start_site | - | 101955 | 101955 | -342  | 23709 | AN5931 |
| 2516 | CONTIG101 | 102154 | 102441 | 1.2  | 1.66E-01 | transcription_start_site | - | 101664 | 101664 | -633  | 23710 | AN5931 |
| 2516 | CONTIG101 | 102154 | 102441 | 1.2  | 1.66E-01 | transcription_start_site | - | 101385 | 101385 | -912  | 23711 | AN5931 |
| 2516 | CONTIG101 | 102154 | 102441 | 1.2  | 1.66E-01 | transcription_start_site | - | 100365 | 100365 | -1932 | 23712 | AN5931 |
| 2516 | CONTIG101 | 102154 | 102441 | 1.2  | 1.66E-01 | transcription_start_site | - | 99735  | 99735  | -2562 | 23713 | AN5931 |
| 2516 | CONTIG101 | 102154 | 102441 | 1.2  | 1.66E-01 | transcription_start_site | - | 99554  | 99554  | -2743 | 23714 | AN5931 |
| 271  | CONTIG101 | 118894 | 119166 | 2.8  | 2.39E-04 | transcription_start_site | - | 115857 | 115857 | -3173 | 23722 | AN5934 |
| 271  | CONTIG101 | 118894 | 119166 | 2.8  | 2.39E-04 | transcription_start_site | - | 114503 | 114503 | -4527 | 23723 | AN5934 |
| 271  | CONTIG101 | 118894 | 119166 | 2.8  | 2.39E-04 | transcription_start_site | - | 114005 | 114005 | -5025 | 23724 | AN5934 |
| 271  | CONTIG101 | 118894 | 119166 | 2.8  | 2.39E-04 | transcription_start_site | - | 113904 | 113904 | -5126 | 23725 | AN5934 |
| 271  | CONTIG101 | 118894 | 119166 | 2.8  | 2.39E-04 | transcription_start_site | - | 118673 | 118673 | -357  | 23728 | AN5935 |
| 271  | CONTIG101 | 118894 | 119166 | 2.8  | 2.39E-04 | transcription_start_site | - | 118304 | 118304 | -726  | 23729 | AN5935 |
| 271  | CONTIG101 | 118894 | 119166 | 2.8  | 2.39E-04 | transcription_start_site | - | 118072 | 118072 | -958  | 23730 | AN5935 |
| 271  | CONTIG101 | 118894 | 119166 | 2.8  | 2.39E-04 | transcription_start_site | - | 117879 | 117879 | -1151 | 23731 | AN5935 |
| 334  | CONTIG101 | 130579 | 130863 | 2.71 | 6.10E-04 | transcription_start_site | - | 127445 | 127445 | -3276 | 23732 | AN5936 |
| 334  | CONTIG101 | 130579 | 130863 | 2.71 | 6.10E-04 | transcription_start_site | - | 127288 | 127288 | -3433 | 23733 | AN5936 |
| 334  | CONTIG101 | 130579 | 130863 | 2.71 | 6.10E-04 | transcription_start_site | - | 127111 | 127111 | -3610 | 23734 | AN5936 |
| 334  | CONTIG101 | 130579 | 130863 | 2.71 | 6.10E-04 | transcription_start_site | - | 129661 | 129661 | -1060 | 23735 | AN5937 |
| 334  | CONTIG101 | 130579 | 130863 | 2.71 | 6.10E-04 | transcription_start_site | + | 131544 | 131544 | -823  | 23736 | AN5938 |
| 334  | CONTIG101 | 130579 | 130863 | 2.71 | 6.10E-04 | transcription_start_site | + | 131704 | 131704 | -983  | 23737 | AN5938 |
| 334  | CONTIG101 | 130579 | 130863 | 2.71 | 6.10E-04 | transcription_start_site | + | 132237 | 132237 | -1516 | 23738 | AN5938 |
| 334  | CONTIG101 | 130579 | 130863 | 2.71 | 6.10E-04 | transcription_start_site | + | 132433 | 132433 | -1712 | 23739 | AN5938 |
| 334  | CONTIG101 | 130579 | 130863 | 2.71 | 6.10E-04 | transcription_start_site | + | 132680 | 132680 | -1959 | 23740 | AN5938 |
| 2225 | CONTIG101 | 134794 | 135218 | 1.29 | 1.25E-01 | transcription_start_site | - | 134997 | 134997 | -9    | 23742 | AN5939 |
| 2225 | CONTIG101 | 134794 | 135218 | 1.29 | 1.25E-01 | transcription_start_site | - | 135216 | 135216 | 210   | 23741 | AN5939 |
| 821  | CONTIG101 | 149106 | 149757 | 2.07 | 1.28E-03 | transcription_start_site | - | 145929 | 145929 | -3502 | 23750 | AN5942 |
| 821  | CONTIG101 | 149106 | 149757 | 2.07 | 1.28E-03 | transcription_start_site | - | 145640 | 145640 | -3791 | 23751 | AN5942 |
| 300  | CONTIG101 | 153846 | 154120 | 2.76 | 2.16E-04 | transcription_start_site | - | 148998 | 148998 | -4985 | 23752 | AN5943 |
| 300  | CONTIG101 | 153846 | 154120 | 2.76 | 2.16E-04 | transcription_start_site | - | 148919 | 148919 | -5064 | 23753 | AN5943 |
| 821  | CONTIG101 | 149106 | 149757 | 2.07 | 1.28E-03 | transcription_start_site | - | 148998 | 148998 | -433  | 23752 | AN5943 |
| 821  | CONTIG101 | 149106 | 149757 | 2.07 | 1.28E-03 | transcription_start_site | - | 148919 | 148919 | -512  | 23753 | AN5943 |
| 821  | CONTIG101 | 149106 | 149757 | 2.07 | 1.28E-03 | transcription_start_site | - | 148696 | 148696 | -735  | 23754 | AN5943 |
| 821  | CONTIG101 | 149106 | 149757 | 2.07 | 1.28E-03 | transcription_start_site | - | 148547 | 148547 | -884  | 23755 | AN5943 |
| 821  | CONTIG101 | 149106 | 149757 | 2.07 | 1.28E-03 | transcription_start_site | - | 148274 | 148274 | -1157 | 23756 | AN5943 |
| 821  | CONTIG101 | 149106 | 149757 | 2.07 | 1.28E-03 | transcription_start_site | - | 148164 | 148164 | -1267 | 23757 | AN5943 |
| 821  | CONTIG101 | 149106 | 149757 | 2.07 | 1.28E-03 | transcription_start_site | - | 147929 | 147929 | -1502 | 23758 | AN5943 |
| 2220 | CONTIG101 | 152326 | 152900 | 1.29 | 1.07E-01 | transcription_start_site | - | 148998 | 148998 | -3615 | 23752 | AN5943 |
| 2220 | CONTIG101 | 152326 | 152900 | 1.29 | 1.07E-01 | transcription_start_site | - | 148919 | 148919 | -3694 | 23753 | AN5943 |
| 2220 | CONTIG101 | 152326 | 152900 | 1.29 | 1.07E-01 | transcription_start_site | - | 148696 | 148696 | -3917 | 23754 | AN5943 |
| 2220 | CONTIG101 | 152326 | 152900 | 1.29 | 1.07E-01 | transcription_start_site | - | 148547 | 148547 | -4066 | 23755 | AN5943 |

|      |           |        |        |      |          |                          |   |        |        |       |       |        |
|------|-----------|--------|--------|------|----------|--------------------------|---|--------|--------|-------|-------|--------|
| 2220 | CONTIG101 | 152326 | 152900 | 1.29 | 1.07E-01 | transcription_start_site | - | 148274 | 148274 | -4339 | 23756 | AN5943 |
| 2220 | CONTIG101 | 152326 | 152900 | 1.29 | 1.07E-01 | transcription_start_site | - | 148164 | 148164 | -4449 | 23757 | AN5943 |
| 2220 | CONTIG101 | 152326 | 152900 | 1.29 | 1.07E-01 | transcription_start_site | - | 147929 | 147929 | -4684 | 23758 | AN5943 |
| 2642 | CONTIG101 | 153096 | 153725 | 1.15 | 1.93E-01 | transcription_start_site | - | 148998 | 148998 | -4412 | 23752 | AN5943 |
| 2642 | CONTIG101 | 153096 | 153725 | 1.15 | 1.93E-01 | transcription_start_site | - | 148919 | 148919 | -4491 | 23753 | AN5943 |
| 2642 | CONTIG101 | 153096 | 153725 | 1.15 | 1.93E-01 | transcription_start_site | - | 148696 | 148696 | -4714 | 23754 | AN5943 |
| 2642 | CONTIG101 | 153096 | 153725 | 1.15 | 1.93E-01 | transcription_start_site | - | 148547 | 148547 | -4863 | 23755 | AN5943 |
| 2642 | CONTIG101 | 153096 | 153725 | 1.15 | 1.93E-01 | transcription_start_site | - | 148274 | 148274 | -5136 | 23756 | AN5943 |
| 2642 | CONTIG101 | 153096 | 153725 | 1.15 | 1.93E-01 | transcription_start_site | - | 148164 | 148164 | -5246 | 23757 | AN5943 |
| 300  | CONTIG101 | 153846 | 154120 | 2.76 | 2.16E-04 | transcription_start_site | - | 153810 | 153810 | -173  | 23759 | AN5944 |
| 300  | CONTIG101 | 153846 | 154120 | 2.76 | 2.16E-04 | transcription_start_site | - | 153160 | 153160 | -823  | 23760 | AN5944 |
| 300  | CONTIG101 | 153846 | 154120 | 2.76 | 2.16E-04 | transcription_start_site | - | 152017 | 152017 | -1966 | 23761 | AN5944 |
| 2220 | CONTIG101 | 152326 | 152900 | 1.29 | 1.07E-01 | transcription_start_site | - | 153160 | 153160 | 547   | 23760 | AN5944 |
| 2220 | CONTIG101 | 152326 | 152900 | 1.29 | 1.07E-01 | transcription_start_site | - | 152017 | 152017 | -596  | 23761 | AN5944 |
| 2220 | CONTIG101 | 152326 | 152900 | 1.29 | 1.07E-01 | transcription_start_site | - | 153810 | 153810 | 1197  | 23759 | AN5944 |
| 2642 | CONTIG101 | 153096 | 153725 | 1.15 | 1.93E-01 | transcription_start_site | - | 153160 | 153160 | -250  | 23760 | AN5944 |
| 2642 | CONTIG101 | 153096 | 153725 | 1.15 | 1.93E-01 | transcription_start_site | - | 153810 | 153810 | 399   | 23759 | AN5944 |
| 2642 | CONTIG101 | 153096 | 153725 | 1.15 | 1.93E-01 | transcription_start_site | - | 152017 | 152017 | -1393 | 23761 | AN5944 |
| 685  | CONTIG101 | 166503 | 167242 | 2.21 | 4.61E-03 | transcription_start_site | - | 165669 | 165669 | -1203 | 23766 | AN5947 |
| 685  | CONTIG101 | 166503 | 167242 | 2.21 | 4.61E-03 | transcription_start_site | - | 165428 | 165428 | -1444 | 23767 | AN5947 |
| 685  | CONTIG101 | 166503 | 167242 | 2.21 | 4.61E-03 | transcription_start_site | - | 164494 | 164494 | -2378 | 23768 | AN5947 |
| 685  | CONTIG101 | 166503 | 167242 | 2.21 | 4.61E-03 | transcription_start_site | - | 164059 | 164059 | -2813 | 23769 | AN5947 |
| 685  | CONTIG101 | 166503 | 167242 | 2.21 | 4.61E-03 | transcription_start_site | - | 163222 | 163222 | -3650 | 23770 | AN5947 |
| 685  | CONTIG101 | 166503 | 167242 | 2.21 | 4.61E-03 | transcription_start_site | - | 161796 | 161796 | -5076 | 23771 | AN5947 |
| 685  | CONTIG101 | 166503 | 167242 | 2.21 | 4.61E-03 | transcription_start_site | - | 161645 | 161645 | -5227 | 23772 | AN5947 |
| 1770 | CONTIG101 | 167263 | 168353 | 1.47 | 4.42E-02 | transcription_start_site | - | 165669 | 165669 | -2139 | 23766 | AN5947 |
| 1770 | CONTIG101 | 167263 | 168353 | 1.47 | 4.42E-02 | transcription_start_site | - | 165428 | 165428 | -2380 | 23767 | AN5947 |
| 1770 | CONTIG101 | 167263 | 168353 | 1.47 | 4.42E-02 | transcription_start_site | - | 164494 | 164494 | -3314 | 23768 | AN5947 |
| 1770 | CONTIG101 | 167263 | 168353 | 1.47 | 4.42E-02 | transcription_start_site | - | 164059 | 164059 | -3749 | 23769 | AN5947 |
| 1770 | CONTIG101 | 167263 | 168353 | 1.47 | 4.42E-02 | transcription_start_site | - | 163222 | 163222 | -4586 | 23770 | AN5947 |
| 2643 | CONTIG101 | 170345 | 170694 | 1.15 | 1.93E-01 | transcription_start_site | - | 165669 | 165669 | -4850 | 23766 | AN5947 |
| 2643 | CONTIG101 | 170345 | 170694 | 1.15 | 1.93E-01 | transcription_start_site | - | 165428 | 165428 | -5091 | 23767 | AN5947 |
| 685  | CONTIG101 | 166503 | 167242 | 2.21 | 4.61E-03 | transcription_start_site | - | 168208 | 168208 | 1335  | 23776 | AN5948 |
| 1770 | CONTIG101 | 167263 | 168353 | 1.47 | 4.42E-02 | transcription_start_site | - | 168208 | 168208 | 400   | 23776 | AN5948 |
| 1770 | CONTIG101 | 167263 | 168353 | 1.47 | 4.42E-02 | transcription_start_site | - | 168522 | 168522 | 714   | 23775 | AN5948 |
| 1770 | CONTIG101 | 167263 | 168353 | 1.47 | 4.42E-02 | transcription_start_site | - | 168616 | 168616 | 808   | 23774 | AN5948 |
| 1770 | CONTIG101 | 167263 | 168353 | 1.47 | 4.42E-02 | transcription_start_site | - | 168936 | 168936 | 1128  | 23773 | AN5948 |
| 2643 | CONTIG101 | 170345 | 170694 | 1.15 | 1.93E-01 | transcription_start_site | - | 168936 | 168936 | -1583 | 23773 | AN5948 |
| 2643 | CONTIG101 | 170345 | 170694 | 1.15 | 1.93E-01 | transcription_start_site | - | 168616 | 168616 | -1903 | 23774 | AN5948 |
| 2643 | CONTIG101 | 170345 | 170694 | 1.15 | 1.93E-01 | transcription_start_site | - | 168522 | 168522 | -1997 | 23775 | AN5948 |
| 2643 | CONTIG101 | 170345 | 170694 | 1.15 | 1.93E-01 | transcription_start_site | - | 168208 | 168208 | -2311 | 23776 | AN5948 |
| 685  | CONTIG101 | 166503 | 167242 | 2.21 | 4.61E-03 | transcription_start_site | + | 169790 | 169790 | -2917 | 23777 | AN5949 |
| 685  | CONTIG101 | 166503 | 167242 | 2.21 | 4.61E-03 | transcription_start_site | + | 169872 | 169872 | -2999 | 23778 | AN5949 |
| 1770 | CONTIG101 | 167263 | 168353 | 1.47 | 4.42E-02 | transcription_start_site | + | 169790 | 169790 | -1982 | 23777 | AN5949 |
| 1770 | CONTIG101 | 167263 | 168353 | 1.47 | 4.42E-02 | transcription_start_site | + | 169872 | 169872 | -2064 | 23778 | AN5949 |
| 2643 | CONTIG101 | 170345 | 170694 | 1.15 | 1.93E-01 | transcription_start_site | + | 169872 | 169872 | 647   | 23778 | AN5949 |
| 2643 | CONTIG101 | 170345 | 170694 | 1.15 | 1.93E-01 | transcription_start_site | + | 169790 | 169790 | 729   | 23777 | AN5949 |
| 2643 | CONTIG101 | 170345 | 170694 | 1.15 | 1.93E-01 | transcription_start_site | + | 174272 | 174272 | -3752 | 23785 | AN5951 |
| 2643 | CONTIG101 | 170345 | 170694 | 1.15 | 1.93E-01 | transcription_start_site | + | 174751 | 174751 | -4231 | 23786 | AN5951 |
| 2643 | CONTIG101 | 170345 | 170694 | 1.15 | 1.93E-01 | transcription_start_site | + | 175048 | 175048 | -4528 | 23787 | AN5951 |
| 2643 | CONTIG101 | 170345 | 170694 | 1.15 | 1.93E-01 | transcription_start_site | + | 175134 | 175134 | -4614 | 23788 | AN5951 |
| 2226 | CONTIG101 | 179565 | 179909 | 1.29 | 1.25E-01 | transcription_start_site | - | 177000 | 177000 | -2737 | 23789 | AN5952 |
| 2226 | CONTIG101 | 179565 | 179909 | 1.29 | 1.25E-01 | transcription_start_site | - | 176742 | 176742 | -2995 | 23790 | AN5952 |
| 2226 | CONTIG101 | 179565 | 179909 | 1.29 | 1.25E-01 | transcription_start_site | - | 176363 | 176363 | -3374 | 23791 | AN5952 |
| 2226 | CONTIG101 | 179565 | 179909 | 1.29 | 1.25E-01 | transcription_start_site | - | 175829 | 175829 | -3908 | 23792 | AN5952 |
| 421  | CONTIG101 | 185405 | 185679 | 2.57 | 9.51E-04 | transcription_start_site | - | 180869 | 180869 | -4673 | 23795 | AN5954 |
| 421  | CONTIG101 | 185405 | 185679 | 2.57 | 9.51E-04 | transcription_start_site | - | 180419 | 180419 | -5123 | 23796 | AN5954 |



|      |           |        |        |      |          |                          |   |        |        |       |       |        |
|------|-----------|--------|--------|------|----------|--------------------------|---|--------|--------|-------|-------|--------|
| 2226 | CONTIG101 | 179565 | 179909 | 1.29 | 1.25E-01 | transcription_start_site | - | 180419 | 180419 | 682   | 23796 | AN5954 |
| 2226 | CONTIG101 | 179565 | 179909 | 1.29 | 1.25E-01 | transcription_start_site | - | 180869 | 180869 | 1132  | 23795 | AN5954 |
| 200  | CONTIG101 | 187820 | 188089 | 2.94 | 0.00E+00 | transcription_start_site | - | 184649 | 184649 | -3305 | 23797 | AN5955 |
| 200  | CONTIG101 | 187820 | 188089 | 2.94 | 0.00E+00 | transcription_start_site | - | 184425 | 184425 | -3529 | 23798 | AN5955 |
| 200  | CONTIG101 | 187820 | 188089 | 2.94 | 0.00E+00 | transcription_start_site | - | 183804 | 183804 | -4150 | 23799 | AN5955 |
| 200  | CONTIG101 | 187820 | 188089 | 2.94 | 0.00E+00 | transcription_start_site | - | 183573 | 183573 | -4381 | 23800 | AN5955 |
| 200  | CONTIG101 | 187820 | 188089 | 2.94 | 0.00E+00 | transcription_start_site | - | 183343 | 183343 | -4611 | 23801 | AN5955 |
| 200  | CONTIG101 | 187820 | 188089 | 2.94 | 0.00E+00 | transcription_start_site | - | 182935 | 182935 | -5019 | 23802 | AN5955 |
| 421  | CONTIG101 | 185405 | 185679 | 2.57 | 9.51E-04 | transcription_start_site | - | 184649 | 184649 | -893  | 23797 | AN5955 |
| 421  | CONTIG101 | 185405 | 185679 | 2.57 | 9.51E-04 | transcription_start_site | - | 184425 | 184425 | -1117 | 23798 | AN5955 |
| 421  | CONTIG101 | 185405 | 185679 | 2.57 | 9.51E-04 | transcription_start_site | - | 183804 | 183804 | -1738 | 23799 | AN5955 |
| 421  | CONTIG101 | 185405 | 185679 | 2.57 | 9.51E-04 | transcription_start_site | - | 183573 | 183573 | -1969 | 23800 | AN5955 |
| 421  | CONTIG101 | 185405 | 185679 | 2.57 | 9.51E-04 | transcription_start_site | - | 183343 | 183343 | -2199 | 23801 | AN5955 |
| 421  | CONTIG101 | 185405 | 185679 | 2.57 | 9.51E-04 | transcription_start_site | - | 182935 | 182935 | -2607 | 23802 | AN5955 |
| 200  | CONTIG101 | 187820 | 188089 | 2.94 | 0.00E+00 | transcription_start_site | - | 187883 | 187883 | -71   | 23804 | AN5956 |
| 200  | CONTIG101 | 187820 | 188089 | 2.94 | 0.00E+00 | transcription_start_site | - | 188173 | 188173 | 218   | 23803 | AN5956 |
| 200  | CONTIG101 | 187820 | 188089 | 2.94 | 0.00E+00 | transcription_start_site | - | 187725 | 187725 | -229  | 23805 | AN5956 |
| 200  | CONTIG101 | 187820 | 188089 | 2.94 | 0.00E+00 | transcription_start_site | - | 187362 | 187362 | -592  | 23806 | AN5956 |
| 1210 | CONTIG101 | 192615 | 192959 | 1.75 | 1.44E-02 | transcription_start_site | - | 188173 | 188173 | -4614 | 23803 | AN5956 |
| 1210 | CONTIG101 | 192615 | 192959 | 1.75 | 1.44E-02 | transcription_start_site | - | 187883 | 187883 | -4904 | 23804 | AN5956 |
| 1210 | CONTIG101 | 192615 | 192959 | 1.75 | 1.44E-02 | transcription_start_site | - | 187725 | 187725 | -5062 | 23805 | AN5956 |
| 200  | CONTIG101 | 187820 | 188089 | 2.94 | 0.00E+00 | transcription_start_site | + | 190469 | 190469 | -2514 | 23807 | AN5957 |
| 200  | CONTIG101 | 187820 | 188089 | 2.94 | 0.00E+00 | transcription_start_site | + | 190937 | 190937 | -2982 | 23808 | AN5957 |
| 200  | CONTIG101 | 187820 | 188089 | 2.94 | 0.00E+00 | transcription_start_site | + | 191598 | 191598 | -3643 | 23809 | AN5957 |
| 421  | CONTIG101 | 185405 | 185679 | 2.57 | 9.51E-04 | transcription_start_site | + | 190469 | 190469 | -4927 | 23807 | AN5957 |
| 1470 | CONTIG102 | 1446   | 2005   | 1.61 | 6.84E-02 | transcription_start_site | + | 628    | 628    | 1097  | 23830 | AN5964 |
| 492  | CONTIG102 | 5790   | 6289   | 2.46 | 3.61E-03 | transcription_start_site | - | 1622   | 1622   | -4417 | 23831 | AN5965 |
| 1360 | CONTIG102 | 4358   | 4787   | 1.66 | 5.88E-02 | transcription_start_site | - | 1622   | 1622   | -2950 | 23831 | AN5965 |
| 1470 | CONTIG102 | 1446   | 2005   | 1.61 | 6.84E-02 | transcription_start_site | - | 1622   | 1622   | -103  | 23831 | AN5965 |
| 26   | CONTIG102 | 7955   | 9281   | 3.57 | 0.00E+00 | transcription_start_site | - | 4871   | 4871   | -3747 | 23832 | AN5966 |
| 26   | CONTIG102 | 7955   | 9281   | 3.57 | 0.00E+00 | transcription_start_site | - | 4031   | 4031   | -4587 | 23833 | AN5966 |
| 26   | CONTIG102 | 7955   | 9281   | 3.57 | 0.00E+00 | transcription_start_site | - | 3223   | 3223   | -5395 | 23834 | AN5966 |
| 492  | CONTIG102 | 5790   | 6289   | 2.46 | 3.61E-03 | transcription_start_site | - | 4871   | 4871   | -1168 | 23832 | AN5966 |
| 492  | CONTIG102 | 5790   | 6289   | 2.46 | 3.61E-03 | transcription_start_site | - | 4031   | 4031   | -2008 | 23833 | AN5966 |
| 492  | CONTIG102 | 5790   | 6289   | 2.46 | 3.61E-03 | transcription_start_site | - | 3223   | 3223   | -2816 | 23834 | AN5966 |
| 1360 | CONTIG102 | 4358   | 4787   | 1.66 | 5.88E-02 | transcription_start_site | - | 4871   | 4871   | 298   | 23832 | AN5966 |
| 1360 | CONTIG102 | 4358   | 4787   | 1.66 | 5.88E-02 | transcription_start_site | - | 4031   | 4031   | -541  | 23833 | AN5966 |
| 1360 | CONTIG102 | 4358   | 4787   | 1.66 | 5.88E-02 | transcription_start_site | - | 3223   | 3223   | -1349 | 23834 | AN5966 |
| 26   | CONTIG102 | 7955   | 9281   | 3.57 | 0.00E+00 | transcription_start_site | + | 12859  | 12859  | -4241 | 23835 | AN5967 |
| 26   | CONTIG102 | 7955   | 9281   | 3.57 | 0.00E+00 | transcription_start_site | + | 13014  | 13014  | -4396 | 23836 | AN5967 |
| 26   | CONTIG102 | 7955   | 9281   | 3.57 | 0.00E+00 | transcription_start_site | + | 13807  | 13807  | -5189 | 23837 | AN5968 |
| 26   | CONTIG102 | 7955   | 9281   | 3.57 | 0.00E+00 | transcription_start_site | + | 14115  | 14115  | -5497 | 23838 | AN5968 |
| 26   | CONTIG102 | 7955   | 9281   | 3.57 | 0.00E+00 | transcription_start_site | + | 14279  | 14279  | -5661 | 23839 | AN5968 |
| 599  | CONTIG102 | 29181  | 29537  | 2.31 | 6.61E-03 | transcription_start_site | - | 28746  | 28746  | -613  | 23857 | AN5973 |
| 599  | CONTIG102 | 29181  | 29537  | 2.31 | 6.61E-03 | transcription_start_site | - | 28640  | 28640  | -719  | 23858 | AN5973 |
| 599  | CONTIG102 | 29181  | 29537  | 2.31 | 6.61E-03 | transcription_start_site | - | 28445  | 28445  | -914  | 23859 | AN5973 |
| 599  | CONTIG102 | 29181  | 29537  | 2.31 | 6.61E-03 | transcription_start_site | - | 27623  | 27623  | -1736 | 23860 | AN5973 |
| 599  | CONTIG102 | 29181  | 29537  | 2.31 | 6.61E-03 | transcription_start_site | - | 27157  | 27157  | -2202 | 23861 | AN5973 |
| 599  | CONTIG102 | 29181  | 29537  | 2.31 | 6.61E-03 | transcription_start_site | - | 26733  | 26733  | -2626 | 23862 | AN5973 |
| 888  | CONTIG102 | 34726  | 35242  | 2.01 | 9.21E-03 | transcription_start_site | - | 34330  | 34330  | -654  | 23863 | AN5975 |
| 1908 | CONTIG102 | 53871  | 54215  | 1.41 | 1.25E-01 | transcription_start_site | - | 50498  | 50498  | -3545 | 23876 | AN5980 |
| 1908 | CONTIG102 | 53871  | 54215  | 1.41 | 1.25E-01 | transcription_start_site | + | 53308  | 53308  | 735   | 23879 | AN5981 |
| 1908 | CONTIG102 | 53871  | 54215  | 1.41 | 1.25E-01 | transcription_start_site | + | 53149  | 53149  | 894   | 23878 | AN5981 |
| 1908 | CONTIG102 | 53871  | 54215  | 1.41 | 1.25E-01 | transcription_start_site | + | 56958  | 56958  | -2915 | 23880 | AN5982 |
| 1908 | CONTIG102 | 53871  | 54215  | 1.41 | 1.25E-01 | transcription_start_site | + | 57149  | 57149  | -3106 | 23881 | AN5982 |
| 1908 | CONTIG102 | 53871  | 54215  | 1.41 | 1.25E-01 | transcription_start_site | + | 57673  | 57673  | -3630 | 23882 | AN5982 |
| 1908 | CONTIG102 | 53871  | 54215  | 1.41 | 1.25E-01 | transcription_start_site | + | 58186  | 58186  | -4143 | 23883 | AN5982 |

|      |           |        |        |      |          |                          |   |        |        |       |       |        |
|------|-----------|--------|--------|------|----------|--------------------------|---|--------|--------|-------|-------|--------|
| 2045 | CONTIG102 | 76584  | 76943  | 1.36 | 1.28E-01 | transcription_start_site | - | 73982  | 73982  | -2781 | 23894 | AN5987 |
| 600  | CONTIG102 | 79444  | 79793  | 2.31 | 6.61E-03 | transcription_start_site | - | 78551  | 78551  | -1067 | 23896 | AN5988 |
| 2046 | CONTIG102 | 81394  | 81811  | 1.36 | 1.44E-01 | transcription_start_site | - | 78551  | 78551  | -3051 | 23896 | AN5988 |
| 600  | CONTIG102 | 79444  | 79793  | 2.31 | 6.61E-03 | transcription_start_site | + | 81481  | 81481  | -1862 | 23897 | AN5989 |
| 600  | CONTIG102 | 79444  | 79793  | 2.31 | 6.61E-03 | transcription_start_site | + | 81809  | 81809  | -2190 | 23898 | AN5989 |
| 2045 | CONTIG102 | 76584  | 76943  | 1.36 | 1.28E-01 | transcription_start_site | + | 81481  | 81481  | -4717 | 23897 | AN5989 |
| 2045 | CONTIG102 | 76584  | 76943  | 1.36 | 1.28E-01 | transcription_start_site | + | 81809  | 81809  | -5045 | 23898 | AN5989 |
| 2046 | CONTIG102 | 81394  | 81811  | 1.36 | 1.44E-01 | transcription_start_site | + | 81481  | 81481  | 121   | 23897 | AN5989 |
| 2046 | CONTIG102 | 81394  | 81811  | 1.36 | 1.44E-01 | transcription_start_site | + | 81809  | 81809  | -206  | 23898 | AN5989 |
| 1007 | CONTIG102 | 120092 | 120366 | 1.91 | 2.62E-02 | transcription_start_site | - | 115789 | 115789 | -4440 | 23935 | AN6002 |
| 1007 | CONTIG102 | 120092 | 120366 | 1.91 | 2.62E-02 | transcription_start_site | - | 118398 | 118398 | -1831 | 23936 | AN6003 |
| 1007 | CONTIG102 | 120092 | 120366 | 1.91 | 2.62E-02 | transcription_start_site | - | 118224 | 118224 | -2005 | 23937 | AN6003 |
| 1681 | CONTIG102 | 122033 | 122922 | 1.51 | 9.24E-02 | transcription_start_site | - | 118398 | 118398 | -4079 | 23936 | AN6003 |
| 1681 | CONTIG102 | 122033 | 122922 | 1.51 | 9.24E-02 | transcription_start_site | - | 118224 | 118224 | -4253 | 23937 | AN6003 |
| 1007 | CONTIG102 | 120092 | 120366 | 1.91 | 2.62E-02 | transcription_start_site | + | 120404 | 120404 | -175  | 23938 | AN6004 |
| 1007 | CONTIG102 | 120092 | 120366 | 1.91 | 2.62E-02 | transcription_start_site | + | 120537 | 120537 | -308  | 23939 | AN6004 |
| 1007 | CONTIG102 | 120092 | 120366 | 1.91 | 2.62E-02 | transcription_start_site | + | 120687 | 120687 | -458  | 23940 | AN6004 |
| 1681 | CONTIG102 | 122033 | 122922 | 1.51 | 9.24E-02 | transcription_start_site | - | 122099 | 122099 | -378  | 23941 | AN6005 |
| 1681 | CONTIG102 | 122033 | 122922 | 1.51 | 9.24E-02 | transcription_start_site | - | 123263 | 123263 | 785   | 23949 | AN6006 |
| 1681 | CONTIG102 | 122033 | 122922 | 1.51 | 9.24E-02 | transcription_start_site | - | 123433 | 123433 | 955   | 23948 | AN6006 |
| 1681 | CONTIG102 | 122033 | 122922 | 1.51 | 9.24E-02 | transcription_start_site | - | 123656 | 123656 | 1178  | 23947 | AN6006 |
| 1672 | CONTIG103 | 5101   | 5390   | 1.51 | 5.22E-02 | transcription_start_site | - | 3905   | 3905   | -1340 | 23958 | AN6009 |
| 1672 | CONTIG103 | 5101   | 5390   | 1.51 | 5.22E-02 | transcription_start_site | - | 3810   | 3810   | -1435 | 23959 | AN6009 |
| 1672 | CONTIG103 | 5101   | 5390   | 1.51 | 5.22E-02 | transcription_start_site | - | 3684   | 3684   | -1561 | 23960 | AN6009 |
| 1672 | CONTIG103 | 5101   | 5390   | 1.51 | 5.22E-02 | transcription_start_site | - | 3157   | 3157   | -2088 | 23961 | AN6009 |
| 1672 | CONTIG103 | 5101   | 5390   | 1.51 | 5.22E-02 | transcription_start_site | - | 1517   | 1517   | -3728 | 23962 | AN6009 |
| 1672 | CONTIG103 | 5101   | 5390   | 1.51 | 5.22E-02 | transcription_start_site | + | 5484   | 5484   | -238  | 23963 | AN6010 |
| 1672 | CONTIG103 | 5101   | 5390   | 1.51 | 5.22E-02 | transcription_start_site | + | 5569   | 5569   | -323  | 23964 | AN6010 |
| 1672 | CONTIG103 | 5101   | 5390   | 1.51 | 5.22E-02 | transcription_start_site | + | 5815   | 5815   | -569  | 23965 | AN6010 |
| 1372 | CONTIG103 | 11557  | 11831  | 1.65 | 3.08E-02 | transcription_start_site | - | 9287   | 9287   | -2407 | 23966 | AN6011 |
| 1372 | CONTIG103 | 11557  | 11831  | 1.65 | 3.08E-02 | transcription_start_site | - | 9141   | 9141   | -2553 | 23967 | AN6011 |
| 2737 | CONTIG103 | 9001   | 9434   | 1.11 | 1.93E-01 | transcription_start_site | - | 9287   | 9287   | 69    | 23966 | AN6011 |
| 2737 | CONTIG103 | 9001   | 9434   | 1.11 | 1.93E-01 | transcription_start_site | - | 9141   | 9141   | -76   | 23967 | AN6011 |
| 1372 | CONTIG103 | 11557  | 11831  | 1.65 | 3.08E-02 | transcription_start_site | + | 11310  | 11310  | 384   | 23969 | AN6012 |
| 1372 | CONTIG103 | 11557  | 11831  | 1.65 | 3.08E-02 | transcription_start_site | + | 10852  | 10852  | 842   | 23968 | AN6012 |
| 2737 | CONTIG103 | 9001   | 9434   | 1.11 | 1.93E-01 | transcription_start_site | + | 10852  | 10852  | -1634 | 23968 | AN6012 |
| 2737 | CONTIG103 | 9001   | 9434   | 1.11 | 1.93E-01 | transcription_start_site | + | 11310  | 11310  | -2092 | 23969 | AN6012 |
| 759  | CONTIG103 | 14417  | 14691  | 2.14 | 4.61E-03 | transcription_start_site | - | 13763  | 13763  | -791  | 23970 | AN6013 |
| 759  | CONTIG103 | 14417  | 14691  | 2.14 | 4.61E-03 | transcription_start_site | - | 13629  | 13629  | -925  | 23971 | AN6013 |
| 759  | CONTIG103 | 14417  | 14691  | 2.14 | 4.61E-03 | transcription_start_site | - | 13405  | 13405  | -1149 | 23972 | AN6013 |
| 759  | CONTIG103 | 14417  | 14691  | 2.14 | 4.61E-03 | transcription_start_site | + | 14994  | 14994  | -440  | 23973 | AN6014 |
| 759  | CONTIG103 | 14417  | 14691  | 2.14 | 4.61E-03 | transcription_start_site | + | 15487  | 15487  | -933  | 23974 | AN6014 |
| 759  | CONTIG103 | 14417  | 14691  | 2.14 | 4.61E-03 | transcription_start_site | + | 15585  | 15585  | -1031 | 23975 | AN6014 |
| 759  | CONTIG103 | 14417  | 14691  | 2.14 | 4.61E-03 | transcription_start_site | + | 16029  | 16029  | -1475 | 23976 | AN6014 |
| 759  | CONTIG103 | 14417  | 14691  | 2.14 | 4.61E-03 | transcription_start_site | + | 17226  | 17226  | -2672 | 23977 | AN6014 |
| 1372 | CONTIG103 | 11557  | 11831  | 1.65 | 3.08E-02 | transcription_start_site | + | 14994  | 14994  | -3300 | 23973 | AN6014 |
| 1372 | CONTIG103 | 11557  | 11831  | 1.65 | 3.08E-02 | transcription_start_site | + | 15487  | 15487  | -3793 | 23974 | AN6014 |
| 1372 | CONTIG103 | 11557  | 11831  | 1.65 | 3.08E-02 | transcription_start_site | + | 15585  | 15585  | -3891 | 23975 | AN6014 |
| 1372 | CONTIG103 | 11557  | 11831  | 1.65 | 3.08E-02 | transcription_start_site | + | 16029  | 16029  | -4335 | 23976 | AN6014 |
| 140  | CONTIG103 | 27531  | 27875  | 3.07 | 0.00E+00 | transcription_start_site | - | 23366  | 23366  | -4337 | 23978 | AN6015 |
| 140  | CONTIG103 | 27531  | 27875  | 3.07 | 0.00E+00 | transcription_start_site | - | 23259  | 23259  | -4444 | 23979 | AN6015 |
| 140  | CONTIG103 | 27531  | 27875  | 3.07 | 0.00E+00 | transcription_start_site | - | 23170  | 23170  | -4533 | 23980 | AN6015 |
| 140  | CONTIG103 | 27531  | 27875  | 3.07 | 0.00E+00 | transcription_start_site | + | 29776  | 29776  | -2073 | 23981 | AN6016 |
| 140  | CONTIG103 | 27531  | 27875  | 3.07 | 0.00E+00 | transcription_start_site | + | 29931  | 29931  | -2228 | 23982 | AN6016 |
| 140  | CONTIG103 | 27531  | 27875  | 3.07 | 0.00E+00 | transcription_start_site | + | 30019  | 30019  | -2316 | 23983 | AN6016 |
| 140  | CONTIG103 | 27531  | 27875  | 3.07 | 0.00E+00 | transcription_start_site | + | 30142  | 30142  | -2439 | 23984 | AN6016 |
| 140  | CONTIG103 | 27531  | 27875  | 3.07 | 0.00E+00 | transcription_start_site | + | 30251  | 30251  | -2548 | 23985 | AN6016 |

|      |           |       |       |      |          |                          |   |       |       |       |       |        |
|------|-----------|-------|-------|------|----------|--------------------------|---|-------|-------|-------|-------|--------|
| 140  | CONTIG103 | 27531 | 27875 | 3.07 | 0.00E+00 | transcription_start_site | + | 30537 | 30537 | -2834 | 23986 | AN6016 |
| 1859 | CONTIG103 | 49596 | 50162 | 1.43 | 5.05E-02 | transcription_start_site | - | 49788 | 49788 | -91   | 24002 | AN6022 |
| 1859 | CONTIG103 | 49596 | 50162 | 1.43 | 5.05E-02 | transcription_start_site | - | 50109 | 50109 | 230   | 24001 | AN6022 |
| 1859 | CONTIG103 | 49596 | 50162 | 1.43 | 5.05E-02 | transcription_start_site | - | 50447 | 50447 | 568   | 24000 | AN6022 |
| 1859 | CONTIG103 | 49596 | 50162 | 1.43 | 5.05E-02 | transcription_start_site | - | 50649 | 50649 | 770   | 23999 | AN6022 |
| 1859 | CONTIG103 | 49596 | 50162 | 1.43 | 5.05E-02 | transcription_start_site | - | 50969 | 50969 | 1090  | 23998 | AN6022 |
| 1774 | CONTIG103 | 61143 | 61402 | 1.47 | 5.88E-02 | transcription_start_site | - | 59389 | 59389 | -1883 | 24010 | AN6025 |
| 1774 | CONTIG103 | 61143 | 61402 | 1.47 | 5.88E-02 | transcription_start_site | - | 59293 | 59293 | -1979 | 24011 | AN6025 |
| 1774 | CONTIG103 | 61143 | 61402 | 1.47 | 5.88E-02 | transcription_start_site | - | 61401 | 61401 | 128   | 24013 | AN6026 |
| 1774 | CONTIG103 | 61143 | 61402 | 1.47 | 5.88E-02 | transcription_start_site | - | 61713 | 61713 | 440   | 24012 | AN6026 |
| 1774 | CONTIG103 | 61143 | 61402 | 1.47 | 5.88E-02 | transcription_start_site | - | 60582 | 60582 | -690  | 24014 | AN6026 |
| 1774 | CONTIG103 | 61143 | 61402 | 1.47 | 5.88E-02 | transcription_start_site | - | 59824 | 59824 | -1448 | 24015 | AN6026 |
| 1774 | CONTIG103 | 61143 | 61402 | 1.47 | 5.88E-02 | transcription_start_site | + | 65494 | 65494 | -4221 | 24025 | AN6029 |
| 1774 | CONTIG103 | 61143 | 61402 | 1.47 | 5.88E-02 | transcription_start_site | + | 65958 | 65958 | -4685 | 24026 | AN6029 |
| 386  | CONTIG104 | 39989 | 40628 | 2.62 | 0.00E+00 | transcription_start_site | - | 36338 | 36338 | -3970 | 24093 | AN6048 |
| 386  | CONTIG104 | 39989 | 40628 | 2.62 | 0.00E+00 | transcription_start_site | - | 35917 | 35917 | -4391 | 24094 | AN6048 |
| 2538 | CONTIG104 | 35326 | 36361 | 1.19 | 1.66E-01 | transcription_start_site | - | 35917 | 35917 | 73    | 24094 | AN6048 |
| 2538 | CONTIG104 | 35326 | 36361 | 1.19 | 1.66E-01 | transcription_start_site | - | 36338 | 36338 | 494   | 24093 | AN6048 |
| 2538 | CONTIG104 | 35326 | 36361 | 1.19 | 1.66E-01 | transcription_start_site | - | 34881 | 34881 | -962  | 24095 | AN6048 |
| 386  | CONTIG104 | 39989 | 40628 | 2.62 | 0.00E+00 | transcription_start_site | - | 39898 | 39898 | -410  | 24096 | AN6049 |
| 386  | CONTIG104 | 39989 | 40628 | 2.62 | 0.00E+00 | transcription_start_site | - | 39504 | 39504 | -804  | 24097 | AN6049 |
| 386  | CONTIG104 | 39989 | 40628 | 2.62 | 0.00E+00 | transcription_start_site | - | 39025 | 39025 | -1283 | 24098 | AN6049 |
| 386  | CONTIG104 | 39989 | 40628 | 2.62 | 0.00E+00 | transcription_start_site | - | 38436 | 38436 | -1872 | 24099 | AN6049 |
| 2379 | CONTIG104 | 43969 | 44396 | 1.24 | 1.28E-01 | transcription_start_site | - | 39898 | 39898 | -4284 | 24096 | AN6049 |
| 2379 | CONTIG104 | 43969 | 44396 | 1.24 | 1.28E-01 | transcription_start_site | - | 39504 | 39504 | -4678 | 24097 | AN6049 |
| 2379 | CONTIG104 | 43969 | 44396 | 1.24 | 1.28E-01 | transcription_start_site | - | 39025 | 39025 | -5157 | 24098 | AN6049 |
| 386  | CONTIG104 | 39989 | 40628 | 2.62 | 0.00E+00 | transcription_start_site | + | 44840 | 44840 | -4531 | 24100 | AN6050 |
| 386  | CONTIG104 | 39989 | 40628 | 2.62 | 0.00E+00 | transcription_start_site | + | 45067 | 45067 | -4758 | 24101 | AN6050 |
| 386  | CONTIG104 | 39989 | 40628 | 2.62 | 0.00E+00 | transcription_start_site | + | 45452 | 45452 | -5143 | 24102 | AN6050 |
| 2379 | CONTIG104 | 43969 | 44396 | 1.24 | 1.28E-01 | transcription_start_site | + | 44840 | 44840 | -657  | 24100 | AN6050 |
| 2379 | CONTIG104 | 43969 | 44396 | 1.24 | 1.28E-01 | transcription_start_site | + | 45067 | 45067 | -884  | 24101 | AN6050 |
| 2379 | CONTIG104 | 43969 | 44396 | 1.24 | 1.28E-01 | transcription_start_site | + | 45452 | 45452 | -1269 | 24102 | AN6050 |
| 2379 | CONTIG104 | 43969 | 44396 | 1.24 | 1.28E-01 | transcription_start_site | + | 46121 | 46121 | -1938 | 24103 | AN6050 |
| 2379 | CONTIG104 | 43969 | 44396 | 1.24 | 1.28E-01 | transcription_start_site | + | 47688 | 47688 | -3505 | 24104 | AN6051 |
| 2379 | CONTIG104 | 43969 | 44396 | 1.24 | 1.28E-01 | transcription_start_site | + | 49187 | 49187 | -5004 | 24105 | AN6051 |
| 1216 | CONTIG104 | 52359 | 52933 | 1.75 | 2.62E-02 | transcription_start_site | + | 51665 | 51665 | 981   | 24110 | AN6052 |
| 1216 | CONTIG104 | 52359 | 52933 | 1.75 | 2.62E-02 | transcription_start_site | + | 51585 | 51585 | 1061  | 24109 | AN6052 |
| 1216 | CONTIG104 | 52359 | 52933 | 1.75 | 2.62E-02 | transcription_start_site | + | 53484 | 53484 | -838  | 24111 | AN6053 |
| 1556 | CONTIG104 | 57379 | 57669 | 1.56 | 5.22E-02 | transcription_start_site | - | 57599 | 57599 | 75    | 24112 | AN6054 |
| 1556 | CONTIG104 | 57379 | 57669 | 1.56 | 5.22E-02 | transcription_start_site | - | 56961 | 56961 | -563  | 24113 | AN6054 |
| 2539 | CONTIG104 | 55734 | 56003 | 1.19 | 1.66E-01 | transcription_start_site | - | 56961 | 56961 | 1092  | 24113 | AN6054 |
| 1556 | CONTIG104 | 57379 | 57669 | 1.56 | 5.22E-02 | transcription_start_site | + | 58122 | 58122 | -598  | 24114 | AN6055 |
| 1556 | CONTIG104 | 57379 | 57669 | 1.56 | 5.22E-02 | transcription_start_site | + | 58395 | 58395 | -871  | 24115 | AN6055 |
| 1556 | CONTIG104 | 57379 | 57669 | 1.56 | 5.22E-02 | transcription_start_site | + | 58505 | 58505 | -981  | 24116 | AN6055 |
| 1556 | CONTIG104 | 57379 | 57669 | 1.56 | 5.22E-02 | transcription_start_site | + | 59195 | 59195 | -1671 | 24117 | AN6055 |
| 1556 | CONTIG104 | 57379 | 57669 | 1.56 | 5.22E-02 | transcription_start_site | + | 59815 | 59815 | -2291 | 24118 | AN6055 |
| 2539 | CONTIG104 | 55734 | 56003 | 1.19 | 1.66E-01 | transcription_start_site | + | 58122 | 58122 | -2253 | 24114 | AN6055 |
| 2539 | CONTIG104 | 55734 | 56003 | 1.19 | 1.66E-01 | transcription_start_site | + | 58395 | 58395 | -2526 | 24115 | AN6055 |
| 2539 | CONTIG104 | 55734 | 56003 | 1.19 | 1.66E-01 | transcription_start_site | + | 58505 | 58505 | -2636 | 24116 | AN6055 |
| 2539 | CONTIG104 | 55734 | 56003 | 1.19 | 1.66E-01 | transcription_start_site | + | 59195 | 59195 | -3326 | 24117 | AN6055 |
| 2539 | CONTIG104 | 55734 | 56003 | 1.19 | 1.66E-01 | transcription_start_site | + | 59815 | 59815 | -3946 | 24118 | AN6055 |
| 438  | CONTIG104 | 68269 | 68768 | 2.53 | 0.00E+00 | transcription_start_site | - | 66406 | 66406 | -2112 | 24127 | AN6058 |
| 438  | CONTIG104 | 68269 | 68768 | 2.53 | 0.00E+00 | transcription_start_site | - | 66246 | 66246 | -2272 | 24128 | AN6058 |
| 470  | CONTIG104 | 71271 | 71681 | 2.48 | 1.22E-03 | transcription_start_site | - | 66406 | 66406 | -5070 | 24127 | AN6058 |
| 1642 | CONTIG104 | 67669 | 68233 | 1.52 | 5.88E-02 | transcription_start_site | - | 66406 | 66406 | -1545 | 24127 | AN6058 |
| 1642 | CONTIG104 | 67669 | 68233 | 1.52 | 5.88E-02 | transcription_start_site | - | 66246 | 66246 | -1705 | 24128 | AN6058 |
| 1772 | CONTIG104 | 70291 | 70925 | 1.47 | 5.05E-02 | transcription_start_site | - | 66406 | 66406 | -4202 | 24127 | AN6058 |

|      |           |        |        |      |          |                          |   |        |        |       |       |        |
|------|-----------|--------|--------|------|----------|--------------------------|---|--------|--------|-------|-------|--------|
| 1772 | CONTIG104 | 70291  | 70925  | 1.47 | 5.05E-02 | transcription_start_site | - | 66246  | 66246  | -4362 | 24128 | AN6058 |
| 438  | CONTIG104 | 68269  | 68768  | 2.53 | 0.00E+00 | transcription_start_site | + | 67375  | 67375  | 1143  | 24130 | AN6059 |
| 438  | CONTIG104 | 68269  | 68768  | 2.53 | 0.00E+00 | transcription_start_site | + | 67284  | 67284  | 1234  | 24129 | AN6059 |
| 1642 | CONTIG104 | 67669  | 68233  | 1.52 | 5.88E-02 | transcription_start_site | + | 67375  | 67375  | 576   | 24130 | AN6059 |
| 1642 | CONTIG104 | 67669  | 68233  | 1.52 | 5.88E-02 | transcription_start_site | + | 67284  | 67284  | 667   | 24129 | AN6059 |
| 438  | CONTIG104 | 68269  | 68768  | 2.53 | 0.00E+00 | transcription_start_site | + | 70038  | 70038  | -1519 | 24131 | AN6060 |
| 438  | CONTIG104 | 68269  | 68768  | 2.53 | 0.00E+00 | transcription_start_site | + | 70809  | 70809  | -2290 | 24132 | AN6060 |
| 470  | CONTIG104 | 71271  | 71681  | 2.48 | 1.22E-03 | transcription_start_site | + | 70809  | 70809  | 667   | 24132 | AN6060 |
| 470  | CONTIG104 | 71271  | 71681  | 2.48 | 1.22E-03 | transcription_start_site | + | 74156  | 74156  | -2680 | 24133 | AN6060 |
| 470  | CONTIG104 | 71271  | 71681  | 2.48 | 1.22E-03 | transcription_start_site | + | 74290  | 74290  | -2814 | 24134 | AN6060 |
| 470  | CONTIG104 | 71271  | 71681  | 2.48 | 1.22E-03 | transcription_start_site | + | 74731  | 74731  | -3255 | 24135 | AN6060 |
| 1642 | CONTIG104 | 67669  | 68233  | 1.52 | 5.88E-02 | transcription_start_site | + | 70038  | 70038  | -2087 | 24131 | AN6060 |
| 1642 | CONTIG104 | 67669  | 68233  | 1.52 | 5.88E-02 | transcription_start_site | + | 70809  | 70809  | -2858 | 24132 | AN6060 |
| 1772 | CONTIG104 | 70291  | 70925  | 1.47 | 5.05E-02 | transcription_start_site | + | 70809  | 70809  | -201  | 24132 | AN6060 |
| 1772 | CONTIG104 | 70291  | 70925  | 1.47 | 5.05E-02 | transcription_start_site | + | 70038  | 70038  | 570   | 24131 | AN6060 |
| 1772 | CONTIG104 | 70291  | 70925  | 1.47 | 5.05E-02 | transcription_start_site | + | 74156  | 74156  | -3548 | 24133 | AN6060 |
| 1772 | CONTIG104 | 70291  | 70925  | 1.47 | 5.05E-02 | transcription_start_site | + | 74290  | 74290  | -3682 | 24134 | AN6060 |
| 1772 | CONTIG104 | 70291  | 70925  | 1.47 | 5.05E-02 | transcription_start_site | + | 74731  | 74731  | -4123 | 24135 | AN6060 |
| 2644 | CONTIG104 | 74332  | 74611  | 1.15 | 1.93E-01 | transcription_start_site | + | 74290  | 74290  | 181   | 24134 | AN6060 |
| 2644 | CONTIG104 | 74332  | 74611  | 1.15 | 1.93E-01 | transcription_start_site | + | 74731  | 74731  | -259  | 24135 | AN6060 |
| 2644 | CONTIG104 | 74332  | 74611  | 1.15 | 1.93E-01 | transcription_start_site | + | 74156  | 74156  | 315   | 24133 | AN6060 |
| 1088 | CONTIG104 | 81002  | 81281  | 1.84 | 1.84E-02 | transcription_start_site | - | 77798  | 77798  | -3343 | 24136 | AN6061 |
| 1088 | CONTIG104 | 81002  | 81281  | 1.84 | 1.84E-02 | transcription_start_site | - | 77472  | 77472  | -3669 | 24137 | AN6061 |
| 1088 | CONTIG104 | 81002  | 81281  | 1.84 | 1.84E-02 | transcription_start_site | - | 77029  | 77029  | -4112 | 24138 | AN6061 |
| 1088 | CONTIG104 | 81002  | 81281  | 1.84 | 1.84E-02 | transcription_start_site | - | 81107  | 81107  | -34   | 24139 | AN6062 |
| 1088 | CONTIG104 | 81002  | 81281  | 1.84 | 1.84E-02 | transcription_start_site | - | 80936  | 80936  | -205  | 24140 | AN6062 |
| 1088 | CONTIG104 | 81002  | 81281  | 1.84 | 1.84E-02 | transcription_start_site | - | 80641  | 80641  | -500  | 24141 | AN6062 |
| 1088 | CONTIG104 | 81002  | 81281  | 1.84 | 1.84E-02 | transcription_start_site | - | 80285  | 80285  | -856  | 24142 | AN6062 |
| 1088 | CONTIG104 | 81002  | 81281  | 1.84 | 1.84E-02 | transcription_start_site | - | 79998  | 79998  | -1143 | 24143 | AN6062 |
| 1088 | CONTIG104 | 81002  | 81281  | 1.84 | 1.84E-02 | transcription_start_site | - | 79802  | 79802  | -1339 | 24144 | AN6062 |
| 1088 | CONTIG104 | 81002  | 81281  | 1.84 | 1.84E-02 | transcription_start_site | - | 79572  | 79572  | -1569 | 24145 | AN6062 |
| 1088 | CONTIG104 | 81002  | 81281  | 1.84 | 1.84E-02 | transcription_start_site | - | 79142  | 79142  | -1999 | 24146 | AN6062 |
| 1088 | CONTIG104 | 81002  | 81281  | 1.84 | 1.84E-02 | transcription_start_site | + | 83589  | 83589  | -2447 | 24147 | AN6063 |
| 1088 | CONTIG104 | 81002  | 81281  | 1.84 | 1.84E-02 | transcription_start_site | + | 83793  | 83793  | -2651 | 24148 | AN6063 |
| 1088 | CONTIG104 | 81002  | 81281  | 1.84 | 1.84E-02 | transcription_start_site | + | 84274  | 84274  | -3132 | 24149 | AN6063 |
| 1088 | CONTIG104 | 81002  | 81281  | 1.84 | 1.84E-02 | transcription_start_site | + | 85077  | 85077  | -3935 | 24150 | AN6063 |
| 1088 | CONTIG104 | 81002  | 81281  | 1.84 | 1.84E-02 | transcription_start_site | + | 85559  | 85559  | -4417 | 24151 | AN6064 |
| 1088 | CONTIG104 | 81002  | 81281  | 1.84 | 1.84E-02 | transcription_start_site | + | 85735  | 85735  | -4593 | 24152 | AN6064 |
| 1088 | CONTIG104 | 81002  | 81281  | 1.84 | 1.84E-02 | transcription_start_site | + | 85834  | 85834  | -4692 | 24153 | AN6064 |
| 1088 | CONTIG104 | 81002  | 81281  | 1.84 | 1.84E-02 | transcription_start_site | + | 85967  | 85967  | -4825 | 24154 | AN6064 |
| 1775 | CONTIG104 | 107927 | 108276 | 1.47 | 6.84E-02 | transcription_start_site | - | 106120 | 106120 | -1981 | 24168 | AN6070 |
| 1775 | CONTIG104 | 107927 | 108276 | 1.47 | 6.84E-02 | transcription_start_site | - | 106059 | 106059 | -2042 | 24169 | AN6070 |
| 1775 | CONTIG104 | 107927 | 108276 | 1.47 | 6.84E-02 | transcription_start_site | - | 105310 | 105310 | -2791 | 24170 | AN6070 |
| 1775 | CONTIG104 | 107927 | 108276 | 1.47 | 6.84E-02 | transcription_start_site | - | 105089 | 105089 | -3012 | 24171 | AN6070 |
| 1775 | CONTIG104 | 107927 | 108276 | 1.47 | 6.84E-02 | transcription_start_site | - | 104808 | 104808 | -3293 | 24172 | AN6070 |
| 1775 | CONTIG104 | 107927 | 108276 | 1.47 | 6.84E-02 | transcription_start_site | + | 108979 | 108979 | -877  | 24173 | AN6071 |
| 1775 | CONTIG104 | 107927 | 108276 | 1.47 | 6.84E-02 | transcription_start_site | + | 109207 | 109207 | -1105 | 24174 | AN6071 |
| 2645 | CONTIG104 | 116927 | 117201 | 1.15 | 1.93E-01 | transcription_start_site | - | 114509 | 114509 | -2555 | 24175 | AN6072 |
| 2645 | CONTIG104 | 116927 | 117201 | 1.15 | 1.93E-01 | transcription_start_site | - | 116211 | 116211 | -853  | 24176 | AN6073 |
| 2645 | CONTIG104 | 116927 | 117201 | 1.15 | 1.93E-01 | transcription_start_site | - | 115969 | 115969 | -1095 | 24177 | AN6073 |
| 2645 | CONTIG104 | 116927 | 117201 | 1.15 | 1.93E-01 | transcription_start_site | - | 115841 | 115841 | -1223 | 24178 | AN6073 |
| 2645 | CONTIG104 | 116927 | 117201 | 1.15 | 1.93E-01 | transcription_start_site | - | 115415 | 115415 | -1649 | 24179 | AN6073 |
| 2645 | CONTIG104 | 116927 | 117201 | 1.15 | 1.93E-01 | transcription_start_site | + | 116664 | 116664 | 400   | 24181 | AN6074 |
| 2645 | CONTIG104 | 116927 | 117201 | 1.15 | 1.93E-01 | transcription_start_site | + | 116550 | 116550 | 514   | 24180 | AN6074 |
| 2645 | CONTIG104 | 116927 | 117201 | 1.15 | 1.93E-01 | transcription_start_site | + | 118816 | 118816 | -1752 | 24182 | AN6075 |
| 2645 | CONTIG104 | 116927 | 117201 | 1.15 | 1.93E-01 | transcription_start_site | + | 119024 | 119024 | -1960 | 24183 | AN6075 |
| 2645 | CONTIG104 | 116927 | 117201 | 1.15 | 1.93E-01 | transcription_start_site | + | 119178 | 119178 | -2114 | 24184 | AN6075 |

|      |           |        |        |      |          |                          |   |        |        |       |       |        |
|------|-----------|--------|--------|------|----------|--------------------------|---|--------|--------|-------|-------|--------|
| 2645 | CONTIG104 | 116927 | 117201 | 1.15 | 1.93E-01 | transcription_start_site | + | 121538 | 121538 | -4474 | 24185 | AN6076 |
| 1156 | CONTIG104 | 149414 | 149753 | 1.79 | 1.06E-02 | transcription_start_site | - | 148413 | 148413 | -1170 | 24205 | AN6084 |
| 1156 | CONTIG104 | 149414 | 149753 | 1.79 | 1.06E-02 | transcription_start_site | - | 149945 | 149945 | 361   | 24207 | AN6085 |
| 1156 | CONTIG104 | 149414 | 149753 | 1.79 | 1.06E-02 | transcription_start_site | + | 154722 | 154722 | -5138 | 24210 | AN6087 |
| 2540 | CONTIG104 | 161794 | 162203 | 1.19 | 1.66E-01 | transcription_start_site | - | 163155 | 163155 | 1156  | 24224 | AN6089 |
| 2540 | CONTIG104 | 161794 | 162203 | 1.19 | 1.66E-01 | transcription_start_site | + | 166734 | 166734 | -4735 | 24225 | AN6090 |
| 2540 | CONTIG104 | 161794 | 162203 | 1.19 | 1.66E-01 | transcription_start_site | + | 166875 | 166875 | -4876 | 24226 | AN6090 |
| 2540 | CONTIG104 | 161794 | 162203 | 1.19 | 1.66E-01 | transcription_start_site | + | 167025 | 167025 | -5026 | 24227 | AN6090 |
| 2541 | CONTIG104 | 169521 | 169787 | 1.19 | 1.66E-01 | transcription_start_site | + | 170432 | 170432 | -778  | 24234 | AN6091 |
| 2541 | CONTIG104 | 169521 | 169787 | 1.19 | 1.66E-01 | transcription_start_site | + | 171234 | 171234 | -1580 | 24235 | AN6091 |
| 2541 | CONTIG104 | 169521 | 169787 | 1.19 | 1.66E-01 | transcription_start_site | + | 171549 | 171549 | -1895 | 24236 | AN6091 |
| 2541 | CONTIG104 | 169521 | 169787 | 1.19 | 1.66E-01 | transcription_start_site | + | 171737 | 171737 | -2083 | 24237 | AN6091 |
| 2541 | CONTIG104 | 169521 | 169787 | 1.19 | 1.66E-01 | transcription_start_site | + | 171893 | 171893 | -2239 | 24238 | AN6091 |
| 1047 | CONTIG104 | 182481 | 182762 | 1.88 | 1.57E-02 | transcription_start_site | - | 182443 | 182443 | -178  | 24248 | AN6095 |
| 1047 | CONTIG104 | 182481 | 182762 | 1.88 | 1.57E-02 | transcription_start_site | - | 181846 | 181846 | -775  | 24249 | AN6095 |
| 1047 | CONTIG104 | 182481 | 182762 | 1.88 | 1.57E-02 | transcription_start_site | - | 181650 | 181650 | -971  | 24250 | AN6095 |
| 1047 | CONTIG104 | 182481 | 182762 | 1.88 | 1.57E-02 | transcription_start_site | - | 181414 | 181414 | -1207 | 24251 | AN6095 |
| 1047 | CONTIG104 | 182481 | 182762 | 1.88 | 1.57E-02 | transcription_start_site | - | 181014 | 181014 | -1607 | 24252 | AN6095 |
| 2536 | CONTIG104 | 182928 | 183819 | 1.19 | 1.59E-01 | transcription_start_site | - | 182443 | 182443 | -930  | 24248 | AN6095 |
| 2536 | CONTIG104 | 182928 | 183819 | 1.19 | 1.59E-01 | transcription_start_site | - | 181846 | 181846 | -1527 | 24249 | AN6095 |
| 2536 | CONTIG104 | 182928 | 183819 | 1.19 | 1.59E-01 | transcription_start_site | - | 181650 | 181650 | -1723 | 24250 | AN6095 |
| 2536 | CONTIG104 | 182928 | 183819 | 1.19 | 1.59E-01 | transcription_start_site | - | 181414 | 181414 | -1959 | 24251 | AN6095 |
| 2536 | CONTIG104 | 182928 | 183819 | 1.19 | 1.59E-01 | transcription_start_site | - | 181014 | 181014 | -2359 | 24252 | AN6095 |
| 1047 | CONTIG104 | 182481 | 182762 | 1.88 | 1.57E-02 | transcription_start_site | + | 186260 | 186260 | -3638 | 24257 | AN6097 |
| 1047 | CONTIG104 | 182481 | 182762 | 1.88 | 1.57E-02 | transcription_start_site | + | 186548 | 186548 | -3926 | 24258 | AN6097 |
| 1047 | CONTIG104 | 182481 | 182762 | 1.88 | 1.57E-02 | transcription_start_site | + | 186726 | 186726 | -4104 | 24259 | AN6097 |
| 1047 | CONTIG104 | 182481 | 182762 | 1.88 | 1.57E-02 | transcription_start_site | + | 187069 | 187069 | -4447 | 24260 | AN6097 |
| 2536 | CONTIG104 | 182928 | 183819 | 1.19 | 1.59E-01 | transcription_start_site | + | 186260 | 186260 | -2886 | 24257 | AN6097 |
| 2536 | CONTIG104 | 182928 | 183819 | 1.19 | 1.59E-01 | transcription_start_site | + | 186548 | 186548 | -3174 | 24258 | AN6097 |
| 2536 | CONTIG104 | 182928 | 183819 | 1.19 | 1.59E-01 | transcription_start_site | + | 186726 | 186726 | -3352 | 24259 | AN6097 |
| 2536 | CONTIG104 | 182928 | 183819 | 1.19 | 1.59E-01 | transcription_start_site | + | 187069 | 187069 | -3695 | 24260 | AN6097 |
| 2536 | CONTIG104 | 182928 | 183819 | 1.19 | 1.59E-01 | transcription_start_site | + | 187976 | 187976 | -4602 | 24261 | AN6098 |
| 2536 | CONTIG104 | 182928 | 183819 | 1.19 | 1.59E-01 | transcription_start_site | + | 188470 | 188470 | -5096 | 24262 | AN6098 |
| 55   | CONTIG104 | 208882 | 209462 | 3.4  | 0.00E+00 | transcription_start_site | - | 204490 | 204490 | -4682 | 24280 | AN6103 |
| 55   | CONTIG104 | 208882 | 209462 | 3.4  | 0.00E+00 | transcription_start_site | - | 204312 | 204312 | -4860 | 24281 | AN6103 |
| 364  | CONTIG104 | 207167 | 207437 | 2.66 | 5.64E-04 | transcription_start_site | - | 204490 | 204490 | -2812 | 24280 | AN6103 |
| 364  | CONTIG104 | 207167 | 207437 | 2.66 | 5.64E-04 | transcription_start_site | - | 204312 | 204312 | -2990 | 24281 | AN6103 |
| 364  | CONTIG104 | 207167 | 207437 | 2.66 | 5.64E-04 | transcription_start_site | - | 203569 | 203569 | -3733 | 24282 | AN6103 |
| 364  | CONTIG104 | 207167 | 207437 | 2.66 | 5.64E-04 | transcription_start_site | - | 203094 | 203094 | -4208 | 24283 | AN6103 |
| 364  | CONTIG104 | 207167 | 207437 | 2.66 | 5.64E-04 | transcription_start_site | - | 202943 | 202943 | -4359 | 24284 | AN6103 |
| 364  | CONTIG104 | 207167 | 207437 | 2.66 | 5.64E-04 | transcription_start_site | - | 202880 | 202880 | -4422 | 24285 | AN6103 |
| 55   | CONTIG104 | 208882 | 209462 | 3.4  | 0.00E+00 | transcription_start_site | + | 209866 | 209866 | -694  | 24286 | AN6104 |
| 364  | CONTIG104 | 207167 | 207437 | 2.66 | 5.64E-04 | transcription_start_site | + | 209866 | 209866 | -2564 | 24286 | AN6104 |
| 1874 | CONTIG104 | 210303 | 211192 | 1.42 | 5.52E-02 | transcription_start_site | + | 209866 | 209866 | 881   | 24286 | AN6104 |
| 55   | CONTIG104 | 208882 | 209462 | 3.4  | 0.00E+00 | transcription_start_site | + | 214001 | 214001 | -4829 | 24287 | AN6105 |
| 55   | CONTIG104 | 208882 | 209462 | 3.4  | 0.00E+00 | transcription_start_site | + | 214418 | 214418 | -5246 | 24288 | AN6105 |
| 978  | CONTIG104 | 213828 | 214112 | 1.93 | 1.30E-02 | transcription_start_site | + | 214001 | 214001 | -31   | 24287 | AN6105 |
| 978  | CONTIG104 | 213828 | 214112 | 1.93 | 1.30E-02 | transcription_start_site | + | 214418 | 214418 | -448  | 24288 | AN6105 |
| 1874 | CONTIG104 | 210303 | 211192 | 1.42 | 5.52E-02 | transcription_start_site | + | 214001 | 214001 | -3253 | 24287 | AN6105 |
| 1874 | CONTIG104 | 210303 | 211192 | 1.42 | 5.52E-02 | transcription_start_site | + | 214418 | 214418 | -3670 | 24288 | AN6105 |
| 389  | CONTIG104 | 221869 | 222288 | 2.62 | 8.69E-04 | transcription_start_site | + | 222253 | 222253 | -174  | 24293 | AN6107 |
| 389  | CONTIG104 | 221869 | 222288 | 2.62 | 8.69E-04 | transcription_start_site | + | 224884 | 224884 | -2805 | 24294 | AN6107 |
| 441  | CONTIG104 | 248416 | 248765 | 2.53 | 1.01E-03 | transcription_start_site | + | 248999 | 248999 | -408  | 24327 | AN6118 |
| 441  | CONTIG104 | 248416 | 248765 | 2.53 | 1.01E-03 | transcription_start_site | + | 249194 | 249194 | -603  | 24328 | AN6118 |
| 441  | CONTIG104 | 248416 | 248765 | 2.53 | 1.01E-03 | transcription_start_site | + | 249415 | 249415 | -824  | 24329 | AN6118 |
| 441  | CONTIG104 | 248416 | 248765 | 2.53 | 1.01E-03 | transcription_start_site | + | 249638 | 249638 | -1047 | 24330 | AN6118 |
| 1643 | CONTIG104 | 249545 | 250404 | 1.52 | 5.88E-02 | transcription_start_site | + | 249638 | 249638 | 336   | 24330 | AN6118 |

|      |           |        |        |      |          |                          |   |        |        |       |       |        |
|------|-----------|--------|--------|------|----------|--------------------------|---|--------|--------|-------|-------|--------|
| 1643 | CONTIG104 | 249545 | 250404 | 1.52 | 5.88E-02 | transcription_start_site | + | 249415 | 249415 | 559   | 24329 | AN6118 |
| 1643 | CONTIG104 | 249545 | 250404 | 1.52 | 5.88E-02 | transcription_start_site | + | 249194 | 249194 | 780   | 24328 | AN6118 |
| 1643 | CONTIG104 | 249545 | 250404 | 1.52 | 5.88E-02 | transcription_start_site | + | 248999 | 248999 | 975   | 24327 | AN6118 |
| 2638 | CONTIG104 | 250520 | 251154 | 1.15 | 1.79E-01 | transcription_start_site | + | 249638 | 249638 | 1199  | 24330 | AN6118 |
| 788  | CONTIG104 | 254120 | 254534 | 2.11 | 2.49E-03 | transcription_start_site | - | 253419 | 253419 | -908  | 24331 | AN6119 |
| 788  | CONTIG104 | 254120 | 254534 | 2.11 | 2.49E-03 | transcription_start_site | - | 252973 | 252973 | -1354 | 24332 | AN6119 |
| 788  | CONTIG104 | 254120 | 254534 | 2.11 | 2.49E-03 | transcription_start_site | + | 255057 | 255057 | -730  | 24333 | AN6120 |
| 788  | CONTIG104 | 254120 | 254534 | 2.11 | 2.49E-03 | transcription_start_site | + | 255524 | 255524 | -1197 | 24334 | AN6120 |
| 788  | CONTIG104 | 254120 | 254534 | 2.11 | 2.49E-03 | transcription_start_site | + | 256821 | 256821 | -2494 | 24335 | AN6120 |
| 1643 | CONTIG104 | 249545 | 250404 | 1.52 | 5.88E-02 | transcription_start_site | + | 255057 | 255057 | -5082 | 24333 | AN6120 |
| 2638 | CONTIG104 | 250520 | 251154 | 1.15 | 1.79E-01 | transcription_start_site | + | 255057 | 255057 | -4220 | 24333 | AN6120 |
| 2638 | CONTIG104 | 250520 | 251154 | 1.15 | 1.79E-01 | transcription_start_site | + | 255524 | 255524 | -4687 | 24334 | AN6120 |
| 225  | CONTIG104 | 270845 | 271119 | 2.89 | 0.00E+00 | transcription_start_site | - | 267342 | 267342 | -3640 | 24341 | AN6123 |
| 225  | CONTIG104 | 270845 | 271119 | 2.89 | 0.00E+00 | transcription_start_site | - | 269789 | 269789 | -1193 | 24342 | AN6124 |
| 225  | CONTIG104 | 270845 | 271119 | 2.89 | 0.00E+00 | transcription_start_site | - | 269613 | 269613 | -1369 | 24343 | AN6124 |
| 225  | CONTIG104 | 270845 | 271119 | 2.89 | 0.00E+00 | transcription_start_site | - | 269136 | 269136 | -1846 | 24344 | AN6124 |
| 225  | CONTIG104 | 270845 | 271119 | 2.89 | 0.00E+00 | transcription_start_site | - | 268957 | 268957 | -2025 | 24345 | AN6124 |
| 225  | CONTIG104 | 270845 | 271119 | 2.89 | 0.00E+00 | transcription_start_site | + | 271321 | 271321 | -339  | 24346 | AN6125 |
| 225  | CONTIG104 | 270845 | 271119 | 2.89 | 0.00E+00 | transcription_start_site | + | 271619 | 271619 | -637  | 24347 | AN6125 |
| 1089 | CONTIG104 | 274876 | 275766 | 1.84 | 1.84E-02 | transcription_start_site | + | 276453 | 276453 | -1132 | 24348 | AN6126 |
| 1089 | CONTIG104 | 274876 | 275766 | 1.84 | 1.84E-02 | transcription_start_site | + | 276693 | 276693 | -1372 | 24349 | AN6126 |
| 1089 | CONTIG104 | 274876 | 275766 | 1.84 | 1.84E-02 | transcription_start_site | + | 276934 | 276934 | -1613 | 24350 | AN6126 |
| 1607 | CONTIG105 | 16068  | 16412  | 1.54 | 9.24E-02 | transcription_start_site | - | 16162  | 16162  | -78   | 24370 | AN6132 |
| 1607 | CONTIG105 | 16068  | 16412  | 1.54 | 9.24E-02 | transcription_start_site | - | 12682  | 12682  | -3558 | 24371 | AN6132 |
| 1841 | CONTIG105 | 91734  | 92243  | 1.44 | 1.25E-01 | transcription_start_site | - | 87385  | 87385  | -4603 | 24438 | AN6155 |
| 1841 | CONTIG105 | 91734  | 92243  | 1.44 | 1.25E-01 | transcription_start_site | - | 86745  | 86745  | -5243 | 24439 | AN6155 |
| 1841 | CONTIG105 | 91734  | 92243  | 1.44 | 1.25E-01 | transcription_start_site | - | 90268  | 90268  | -1720 | 24440 | AN6156 |
| 1841 | CONTIG105 | 91734  | 92243  | 1.44 | 1.25E-01 | transcription_start_site | - | 90025  | 90025  | -1963 | 24441 | AN6156 |
| 1842 | CONTIG105 | 92554  | 93068  | 1.44 | 1.25E-01 | transcription_start_site | - | 90268  | 90268  | -2543 | 24440 | AN6156 |
| 1842 | CONTIG105 | 92554  | 93068  | 1.44 | 1.25E-01 | transcription_start_site | - | 90025  | 90025  | -2786 | 24441 | AN6156 |
| 1016 | CONTIG105 | 95789  | 96058  | 1.9  | 3.08E-02 | transcription_start_site | - | 92549  | 92549  | -3374 | 24442 | AN6157 |
| 1016 | CONTIG105 | 95789  | 96058  | 1.9  | 3.08E-02 | transcription_start_site | - | 92333  | 92333  | -3590 | 24443 | AN6157 |
| 1841 | CONTIG105 | 91734  | 92243  | 1.44 | 1.25E-01 | transcription_start_site | - | 92333  | 92333  | 344   | 24443 | AN6157 |
| 1841 | CONTIG105 | 91734  | 92243  | 1.44 | 1.25E-01 | transcription_start_site | - | 92549  | 92549  | 560   | 24442 | AN6157 |
| 1842 | CONTIG105 | 92554  | 93068  | 1.44 | 1.25E-01 | transcription_start_site | - | 92549  | 92549  | -262  | 24442 | AN6157 |
| 1842 | CONTIG105 | 92554  | 93068  | 1.44 | 1.25E-01 | transcription_start_site | - | 92333  | 92333  | -478  | 24443 | AN6157 |
| 1016 | CONTIG105 | 95789  | 96058  | 1.9  | 3.08E-02 | transcription_start_site | - | 93418  | 93418  | -2505 | 24444 | AN6158 |
| 1016 | CONTIG105 | 95789  | 96058  | 1.9  | 3.08E-02 | transcription_start_site | - | 93283  | 93283  | -2640 | 24445 | AN6158 |
| 1016 | CONTIG105 | 95789  | 96058  | 1.9  | 3.08E-02 | transcription_start_site | - | 93107  | 93107  | -2816 | 24446 | AN6158 |
| 1841 | CONTIG105 | 91734  | 92243  | 1.44 | 1.25E-01 | transcription_start_site | - | 93107  | 93107  | 1118  | 24446 | AN6158 |
| 1842 | CONTIG105 | 92554  | 93068  | 1.44 | 1.25E-01 | transcription_start_site | - | 93107  | 93107  | 296   | 24446 | AN6158 |
| 1842 | CONTIG105 | 92554  | 93068  | 1.44 | 1.25E-01 | transcription_start_site | - | 93283  | 93283  | 472   | 24445 | AN6158 |
| 1842 | CONTIG105 | 92554  | 93068  | 1.44 | 1.25E-01 | transcription_start_site | - | 93418  | 93418  | 607   | 24444 | AN6158 |
| 1016 | CONTIG105 | 95789  | 96058  | 1.9  | 3.08E-02 | transcription_start_site | - | 95307  | 95307  | -616  | 24447 | AN6159 |
| 1016 | CONTIG105 | 95789  | 96058  | 1.9  | 3.08E-02 | transcription_start_site | - | 95120  | 95120  | -803  | 24448 | AN6159 |
| 1016 | CONTIG105 | 95789  | 96058  | 1.9  | 3.08E-02 | transcription_start_site | - | 95028  | 95028  | -895  | 24449 | AN6159 |
| 1016 | CONTIG105 | 95789  | 96058  | 1.9  | 3.08E-02 | transcription_start_site | - | 93987  | 93987  | -1936 | 24450 | AN6159 |
| 1842 | CONTIG105 | 92554  | 93068  | 1.44 | 1.25E-01 | transcription_start_site | - | 93987  | 93987  | 1176  | 24450 | AN6159 |
| 1016 | CONTIG105 | 95789  | 96058  | 1.9  | 3.08E-02 | transcription_start_site | + | 96169  | 96169  | -245  | 24451 | AN6160 |
| 1016 | CONTIG105 | 95789  | 96058  | 1.9  | 3.08E-02 | transcription_start_site | + | 96298  | 96298  | -374  | 24452 | AN6160 |
| 1016 | CONTIG105 | 95789  | 96058  | 1.9  | 3.08E-02 | transcription_start_site | + | 96471  | 96471  | -547  | 24453 | AN6160 |
| 1016 | CONTIG105 | 95789  | 96058  | 1.9  | 3.08E-02 | transcription_start_site | + | 96798  | 96798  | -874  | 24454 | AN6160 |
| 1841 | CONTIG105 | 91734  | 92243  | 1.44 | 1.25E-01 | transcription_start_site | + | 96169  | 96169  | -4180 | 24451 | AN6160 |
| 1841 | CONTIG105 | 91734  | 92243  | 1.44 | 1.25E-01 | transcription_start_site | + | 96298  | 96298  | -4309 | 24452 | AN6160 |
| 1841 | CONTIG105 | 91734  | 92243  | 1.44 | 1.25E-01 | transcription_start_site | + | 96471  | 96471  | -4482 | 24453 | AN6160 |
| 1841 | CONTIG105 | 91734  | 92243  | 1.44 | 1.25E-01 | transcription_start_site | + | 96798  | 96798  | -4809 | 24454 | AN6160 |
| 1842 | CONTIG105 | 92554  | 93068  | 1.44 | 1.25E-01 | transcription_start_site | + | 96169  | 96169  | -3358 | 24451 | AN6160 |



|      |           |        |        |      |          |                          |   |        |        |       |       |        |
|------|-----------|--------|--------|------|----------|--------------------------|---|--------|--------|-------|-------|--------|
| 1842 | CONTIG105 | 92554  | 93068  | 1.44 | 1.25E-01 | transcription_start_site | + | 96298  | 96298  | -3487 | 24452 | AN6160 |
| 1842 | CONTIG105 | 92554  | 93068  | 1.44 | 1.25E-01 | transcription_start_site | + | 96471  | 96471  | -3660 | 24453 | AN6160 |
| 1842 | CONTIG105 | 92554  | 93068  | 1.44 | 1.25E-01 | transcription_start_site | + | 96798  | 96798  | -3987 | 24454 | AN6160 |
| 1016 | CONTIG105 | 95789  | 96058  | 1.9  | 3.08E-02 | transcription_start_site | + | 99106  | 99106  | -3182 | 24455 | AN6161 |
| 1016 | CONTIG105 | 95789  | 96058  | 1.9  | 3.08E-02 | transcription_start_site | + | 99250  | 99250  | -3326 | 24456 | AN6161 |
| 1016 | CONTIG105 | 95789  | 96058  | 1.9  | 3.08E-02 | transcription_start_site | + | 100303 | 100303 | -4379 | 24457 | AN6161 |
| 1016 | CONTIG105 | 95789  | 96058  | 1.9  | 3.08E-02 | transcription_start_site | + | 100804 | 100804 | -4880 | 24458 | AN6161 |
| 418  | CONTIG105 | 103426 | 103860 | 2.57 | 0.00E+00 | transcription_start_site | - | 102504 | 102504 | -1139 | 24459 | AN6162 |
| 418  | CONTIG105 | 103426 | 103860 | 2.57 | 0.00E+00 | transcription_start_site | - | 101624 | 101624 | -2019 | 24460 | AN6162 |
| 418  | CONTIG105 | 103426 | 103860 | 2.57 | 0.00E+00 | transcription_start_site | - | 103673 | 103673 | 30    | 24463 | AN6163 |
| 418  | CONTIG105 | 103426 | 103860 | 2.57 | 0.00E+00 | transcription_start_site | - | 103850 | 103850 | 207   | 24462 | AN6163 |
| 418  | CONTIG105 | 103426 | 103860 | 2.57 | 0.00E+00 | transcription_start_site | - | 103930 | 103930 | 287   | 24461 | AN6163 |
| 418  | CONTIG105 | 103426 | 103860 | 2.57 | 0.00E+00 | transcription_start_site | + | 104758 | 104758 | -1115 | 24464 | AN6164 |
| 418  | CONTIG105 | 103426 | 103860 | 2.57 | 0.00E+00 | transcription_start_site | + | 105442 | 105442 | -1799 | 24465 | AN6164 |
| 418  | CONTIG105 | 103426 | 103860 | 2.57 | 0.00E+00 | transcription_start_site | + | 105650 | 105650 | -2007 | 24466 | AN6164 |
| 418  | CONTIG105 | 103426 | 103860 | 2.57 | 0.00E+00 | transcription_start_site | + | 108430 | 108430 | -4787 | 24467 | AN6164 |
| 418  | CONTIG105 | 103426 | 103860 | 2.57 | 0.00E+00 | transcription_start_site | + | 108647 | 108647 | -5004 | 24468 | AN6164 |
| 418  | CONTIG105 | 103426 | 103860 | 2.57 | 0.00E+00 | transcription_start_site | + | 108856 | 108856 | -5213 | 24469 | AN6164 |
| 206  | CONTIG105 | 123920 | 124404 | 2.93 | 0.00E+00 | transcription_start_site | - | 120204 | 120204 | -3958 | 24482 | AN6167 |
| 206  | CONTIG105 | 123920 | 124404 | 2.93 | 0.00E+00 | transcription_start_site | - | 120033 | 120033 | -4129 | 24483 | AN6167 |
| 206  | CONTIG105 | 123920 | 124404 | 2.93 | 0.00E+00 | transcription_start_site | - | 119463 | 119463 | -4699 | 24484 | AN6167 |
| 206  | CONTIG105 | 123920 | 124404 | 2.93 | 0.00E+00 | transcription_start_site | - | 119155 | 119155 | -5007 | 24485 | AN6167 |
| 601  | CONTIG105 | 125035 | 125479 | 2.31 | 7.85E-03 | transcription_start_site | - | 120204 | 120204 | -5053 | 24482 | AN6167 |
| 961  | CONTIG105 | 120610 | 120884 | 1.95 | 2.62E-02 | transcription_start_site | - | 120204 | 120204 | -543  | 24482 | AN6167 |
| 961  | CONTIG105 | 120610 | 120884 | 1.95 | 2.62E-02 | transcription_start_site | - | 120033 | 120033 | -714  | 24483 | AN6167 |
| 961  | CONTIG105 | 120610 | 120884 | 1.95 | 2.62E-02 | transcription_start_site | - | 119463 | 119463 | -1284 | 24484 | AN6167 |
| 961  | CONTIG105 | 120610 | 120884 | 1.95 | 2.62E-02 | transcription_start_site | - | 119155 | 119155 | -1592 | 24485 | AN6167 |
| 961  | CONTIG105 | 120610 | 120884 | 1.95 | 2.62E-02 | transcription_start_site | - | 118734 | 118734 | -2013 | 24486 | AN6167 |
| 206  | CONTIG105 | 123920 | 124404 | 2.93 | 0.00E+00 | transcription_start_site | - | 123800 | 123800 | -362  | 24487 | AN6168 |
| 206  | CONTIG105 | 123920 | 124404 | 2.93 | 0.00E+00 | transcription_start_site | - | 123491 | 123491 | -671  | 24488 | AN6168 |
| 206  | CONTIG105 | 123920 | 124404 | 2.93 | 0.00E+00 | transcription_start_site | - | 123335 | 123335 | -827  | 24489 | AN6168 |
| 206  | CONTIG105 | 123920 | 124404 | 2.93 | 0.00E+00 | transcription_start_site | - | 123164 | 123164 | -998  | 24490 | AN6168 |
| 206  | CONTIG105 | 123920 | 124404 | 2.93 | 0.00E+00 | transcription_start_site | - | 123024 | 123024 | -1138 | 24491 | AN6168 |
| 206  | CONTIG105 | 123920 | 124404 | 2.93 | 0.00E+00 | transcription_start_site | - | 122613 | 122613 | -1549 | 24492 | AN6168 |
| 206  | CONTIG105 | 123920 | 124404 | 2.93 | 0.00E+00 | transcription_start_site | - | 121445 | 121445 | -2717 | 24493 | AN6168 |
| 601  | CONTIG105 | 125035 | 125479 | 2.31 | 7.85E-03 | transcription_start_site | - | 123800 | 123800 | -1457 | 24487 | AN6168 |
| 601  | CONTIG105 | 125035 | 125479 | 2.31 | 7.85E-03 | transcription_start_site | - | 123491 | 123491 | -1766 | 24488 | AN6168 |
| 601  | CONTIG105 | 125035 | 125479 | 2.31 | 7.85E-03 | transcription_start_site | - | 123335 | 123335 | -1922 | 24489 | AN6168 |
| 601  | CONTIG105 | 125035 | 125479 | 2.31 | 7.85E-03 | transcription_start_site | - | 123164 | 123164 | -2093 | 24490 | AN6168 |
| 601  | CONTIG105 | 125035 | 125479 | 2.31 | 7.85E-03 | transcription_start_site | - | 123024 | 123024 | -2233 | 24491 | AN6168 |
| 601  | CONTIG105 | 125035 | 125479 | 2.31 | 7.85E-03 | transcription_start_site | - | 122613 | 122613 | -2644 | 24492 | AN6168 |
| 601  | CONTIG105 | 125035 | 125479 | 2.31 | 7.85E-03 | transcription_start_site | - | 121445 | 121445 | -3812 | 24493 | AN6168 |
| 961  | CONTIG105 | 120610 | 120884 | 1.95 | 2.62E-02 | transcription_start_site | - | 121445 | 121445 | 698   | 24493 | AN6168 |
| 1079 | CONTIG105 | 125930 | 126284 | 1.85 | 2.18E-02 | transcription_start_site | - | 123800 | 123800 | -2307 | 24487 | AN6168 |
| 1079 | CONTIG105 | 125930 | 126284 | 1.85 | 2.18E-02 | transcription_start_site | - | 123491 | 123491 | -2616 | 24488 | AN6168 |
| 1079 | CONTIG105 | 125930 | 126284 | 1.85 | 2.18E-02 | transcription_start_site | - | 123335 | 123335 | -2772 | 24489 | AN6168 |
| 1079 | CONTIG105 | 125930 | 126284 | 1.85 | 2.18E-02 | transcription_start_site | - | 123164 | 123164 | -2943 | 24490 | AN6168 |
| 1079 | CONTIG105 | 125930 | 126284 | 1.85 | 2.18E-02 | transcription_start_site | - | 123024 | 123024 | -3083 | 24491 | AN6168 |
| 1079 | CONTIG105 | 125930 | 126284 | 1.85 | 2.18E-02 | transcription_start_site | - | 122613 | 122613 | -3494 | 24492 | AN6168 |
| 1079 | CONTIG105 | 125930 | 126284 | 1.85 | 2.18E-02 | transcription_start_site | - | 121445 | 121445 | -4662 | 24493 | AN6168 |
| 206  | CONTIG105 | 123920 | 124404 | 2.93 | 0.00E+00 | transcription_start_site | + | 126296 | 126296 | -2134 | 24494 | AN6169 |
| 206  | CONTIG105 | 123920 | 124404 | 2.93 | 0.00E+00 | transcription_start_site | + | 126744 | 126744 | -2582 | 24495 | AN6169 |
| 601  | CONTIG105 | 125035 | 125479 | 2.31 | 7.85E-03 | transcription_start_site | + | 126296 | 126296 | -1039 | 24494 | AN6169 |
| 601  | CONTIG105 | 125035 | 125479 | 2.31 | 7.85E-03 | transcription_start_site | + | 126744 | 126744 | -1487 | 24495 | AN6169 |
| 1079 | CONTIG105 | 125930 | 126284 | 1.85 | 2.18E-02 | transcription_start_site | + | 126296 | 126296 | -189  | 24494 | AN6169 |
| 1079 | CONTIG105 | 125930 | 126284 | 1.85 | 2.18E-02 | transcription_start_site | + | 126744 | 126744 | -637  | 24495 | AN6169 |
| 206  | CONTIG105 | 123920 | 124404 | 2.93 | 0.00E+00 | transcription_start_site | + | 129108 | 129108 | -4946 | 24496 | AN6170 |

|      |           |        |        |      |          |                          |   |        |        |       |       |        |
|------|-----------|--------|--------|------|----------|--------------------------|---|--------|--------|-------|-------|--------|
| 206  | CONTIG105 | 123920 | 124404 | 2.93 | 0.00E+00 | transcription_start_site | + | 129339 | 129339 | -5177 | 24497 | AN6170 |
| 601  | CONTIG105 | 125035 | 125479 | 2.31 | 7.85E-03 | transcription_start_site | + | 129108 | 129108 | -3851 | 24496 | AN6170 |
| 601  | CONTIG105 | 125035 | 125479 | 2.31 | 7.85E-03 | transcription_start_site | + | 129339 | 129339 | -4082 | 24497 | AN6170 |
| 1079 | CONTIG105 | 125930 | 126284 | 1.85 | 2.18E-02 | transcription_start_site | + | 129108 | 129108 | -3001 | 24496 | AN6170 |
| 1079 | CONTIG105 | 125930 | 126284 | 1.85 | 2.18E-02 | transcription_start_site | + | 129339 | 129339 | -3232 | 24497 | AN6170 |
| 1079 | CONTIG105 | 125930 | 126284 | 1.85 | 2.18E-02 | transcription_start_site | + | 130659 | 130659 | -4552 | 24498 | AN6171 |
| 1079 | CONTIG105 | 125930 | 126284 | 1.85 | 2.18E-02 | transcription_start_site | + | 130755 | 130755 | -4648 | 24499 | AN6171 |
| 1079 | CONTIG105 | 125930 | 126284 | 1.85 | 2.18E-02 | transcription_start_site | + | 131193 | 131193 | -5086 | 24500 | AN6171 |
| 793  | CONTIG105 | 133955 | 134379 | 2.11 | 1.57E-02 | transcription_start_site | - | 132900 | 132900 | -1267 | 24501 | AN6172 |
| 793  | CONTIG105 | 133955 | 134379 | 2.11 | 1.57E-02 | transcription_start_site | + | 139062 | 139062 | -4895 | 24507 | AN6175 |
| 793  | CONTIG105 | 133955 | 134379 | 2.11 | 1.57E-02 | transcription_start_site | + | 139151 | 139151 | -4984 | 24508 | AN6175 |
| 60   | CONTIG105 | 173720 | 174204 | 3.39 | 0.00E+00 | transcription_start_site | - | 174405 | 174405 | 443   | 24561 | AN6192 |
| 95   | CONTIG105 | 189979 | 190483 | 3.24 | 0.00E+00 | transcription_start_site | - | 188429 | 188429 | -1802 | 24565 | AN6195 |
| 794  | CONTIG105 | 187971 | 188230 | 2.11 | 1.57E-02 | transcription_start_site | - | 188429 | 188429 | 328   | 24565 | AN6195 |
| 2085 | CONTIG105 | 191784 | 192655 | 1.34 | 1.11E-01 | transcription_start_site | - | 188429 | 188429 | -3790 | 24565 | AN6195 |
| 357  | CONTIG105 | 196894 | 197228 | 2.67 | 1.80E-03 | transcription_start_site | + | 198753 | 198753 | -1692 | 24566 | AN6196 |
| 357  | CONTIG105 | 196894 | 197228 | 2.67 | 1.80E-03 | transcription_start_site | + | 199090 | 199090 | -2029 | 24567 | AN6196 |
| 391  | CONTIG105 | 195094 | 195510 | 2.62 | 2.22E-03 | transcription_start_site | + | 198753 | 198753 | -3451 | 24566 | AN6196 |
| 391  | CONTIG105 | 195094 | 195510 | 2.62 | 2.22E-03 | transcription_start_site | + | 199090 | 199090 | -3788 | 24567 | AN6196 |
| 2276 | CONTIG105 | 193894 | 194388 | 1.28 | 1.93E-01 | transcription_start_site | + | 198753 | 198753 | -4612 | 24566 | AN6196 |
| 2276 | CONTIG105 | 193894 | 194388 | 1.28 | 1.93E-01 | transcription_start_site | + | 199090 | 199090 | -4949 | 24567 | AN6196 |
| 856  | CONTIG105 | 213085 | 214794 | 2.05 | 3.45E-03 | transcription_start_site | - | 213169 | 213169 | -770  | 24579 | AN6201 |
| 856  | CONTIG105 | 213085 | 214794 | 2.05 | 3.45E-03 | transcription_start_site | - | 212557 | 212557 | -1382 | 24580 | AN6201 |
| 109  | CONTIG105 | 220504 | 220929 | 3.18 | 2.67E-04 | transcription_start_site | + | 225737 | 225737 | -5020 | 24581 | AN6202 |
| 109  | CONTIG105 | 220504 | 220929 | 3.18 | 2.67E-04 | transcription_start_site | + | 225812 | 225812 | -5095 | 24582 | AN6202 |
| 109  | CONTIG105 | 220504 | 220929 | 3.18 | 2.67E-04 | transcription_start_site | + | 225925 | 225925 | -5208 | 24583 | AN6202 |
| 1608 | CONTIG105 | 224121 | 224615 | 1.54 | 9.24E-02 | transcription_start_site | + | 225737 | 225737 | -1369 | 24581 | AN6202 |
| 1608 | CONTIG105 | 224121 | 224615 | 1.54 | 9.24E-02 | transcription_start_site | + | 225812 | 225812 | -1444 | 24582 | AN6202 |
| 1608 | CONTIG105 | 224121 | 224615 | 1.54 | 9.24E-02 | transcription_start_site | + | 225925 | 225925 | -1557 | 24583 | AN6202 |
| 1608 | CONTIG105 | 224121 | 224615 | 1.54 | 9.24E-02 | transcription_start_site | + | 226050 | 226050 | -1682 | 24584 | AN6202 |
| 1608 | CONTIG105 | 224121 | 224615 | 1.54 | 9.24E-02 | transcription_start_site | + | 226262 | 226262 | -1894 | 24585 | AN6202 |
| 1608 | CONTIG105 | 224121 | 224615 | 1.54 | 9.24E-02 | transcription_start_site | + | 226986 | 226986 | -2618 | 24586 | AN6202 |
| 1608 | CONTIG105 | 224121 | 224615 | 1.54 | 9.24E-02 | transcription_start_site | + | 227833 | 227833 | -3465 | 24587 | AN6203 |
| 1608 | CONTIG105 | 224121 | 224615 | 1.54 | 9.24E-02 | transcription_start_site | + | 228168 | 228168 | -3800 | 24588 | AN6203 |
| 1384 | CONTIG105 | 241728 | 242842 | 1.64 | 4.42E-02 | transcription_start_site | - | 237916 | 237916 | -4369 | 24589 | AN6205 |
| 1384 | CONTIG105 | 241728 | 242842 | 1.64 | 4.42E-02 | transcription_start_site | - | 237801 | 237801 | -4484 | 24590 | AN6205 |
| 1384 | CONTIG105 | 241728 | 242842 | 1.64 | 4.42E-02 | transcription_start_site | - | 237648 | 237648 | -4637 | 24591 | AN6205 |
| 2096 | CONTIG105 | 238578 | 239317 | 1.34 | 1.66E-01 | transcription_start_site | - | 237916 | 237916 | -1031 | 24589 | AN6205 |
| 2096 | CONTIG105 | 238578 | 239317 | 1.34 | 1.66E-01 | transcription_start_site | - | 237801 | 237801 | -1146 | 24590 | AN6205 |
| 2096 | CONTIG105 | 238578 | 239317 | 1.34 | 1.66E-01 | transcription_start_site | - | 237648 | 237648 | -1299 | 24591 | AN6205 |
| 2096 | CONTIG105 | 238578 | 239317 | 1.34 | 1.66E-01 | transcription_start_site | - | 236509 | 236509 | -2438 | 24592 | AN6205 |
| 2096 | CONTIG105 | 238578 | 239317 | 1.34 | 1.66E-01 | transcription_start_site | - | 236286 | 236286 | -2661 | 24593 | AN6205 |
| 2096 | CONTIG105 | 238578 | 239317 | 1.34 | 1.66E-01 | transcription_start_site | + | 238860 | 238860 | 87    | 24597 | AN6206 |
| 2096 | CONTIG105 | 238578 | 239317 | 1.34 | 1.66E-01 | transcription_start_site | + | 238575 | 238575 | 372   | 24596 | AN6206 |
| 2096 | CONTIG105 | 238578 | 239317 | 1.34 | 1.66E-01 | transcription_start_site | + | 238500 | 238500 | 447   | 24595 | AN6206 |
| 2096 | CONTIG105 | 238578 | 239317 | 1.34 | 1.66E-01 | transcription_start_site | + | 238275 | 238275 | 672   | 24594 | AN6206 |
| 482  | CONTIG105 | 243243 | 243666 | 2.47 | 1.22E-03 | transcription_start_site | - | 241591 | 241591 | -1863 | 24598 | AN6207 |
| 482  | CONTIG105 | 243243 | 243666 | 2.47 | 1.22E-03 | transcription_start_site | - | 241394 | 241394 | -2060 | 24599 | AN6207 |
| 482  | CONTIG105 | 243243 | 243666 | 2.47 | 1.22E-03 | transcription_start_site | - | 241102 | 241102 | -2352 | 24600 | AN6207 |
| 482  | CONTIG105 | 243243 | 243666 | 2.47 | 1.22E-03 | transcription_start_site | - | 240158 | 240158 | -3296 | 24601 | AN6207 |
| 1384 | CONTIG105 | 241728 | 242842 | 1.64 | 4.42E-02 | transcription_start_site | - | 241591 | 241591 | -694  | 24598 | AN6207 |
| 1384 | CONTIG105 | 241728 | 242842 | 1.64 | 4.42E-02 | transcription_start_site | - | 241394 | 241394 | -891  | 24599 | AN6207 |
| 1384 | CONTIG105 | 241728 | 242842 | 1.64 | 4.42E-02 | transcription_start_site | - | 241102 | 241102 | -1183 | 24600 | AN6207 |
| 1384 | CONTIG105 | 241728 | 242842 | 1.64 | 4.42E-02 | transcription_start_site | - | 240158 | 240158 | -2127 | 24601 | AN6207 |
| 2096 | CONTIG105 | 238578 | 239317 | 1.34 | 1.66E-01 | transcription_start_site | - | 240158 | 240158 | 1210  | 24601 | AN6207 |
| 482  | CONTIG105 | 243243 | 243666 | 2.47 | 1.22E-03 | transcription_start_site | + | 244603 | 244603 | -1148 | 24602 | AN6208 |
| 482  | CONTIG105 | 243243 | 243666 | 2.47 | 1.22E-03 | transcription_start_site | + | 244977 | 244977 | -1522 | 24603 | AN6208 |

|      |           |        |        |      |          |                          |   |        |        |       |       |        |
|------|-----------|--------|--------|------|----------|--------------------------|---|--------|--------|-------|-------|--------|
| 482  | CONTIG105 | 243243 | 243666 | 2.47 | 1.22E-03 | transcription_start_site | + | 245199 | 245199 | -1744 | 24604 | AN6208 |
| 482  | CONTIG105 | 243243 | 243666 | 2.47 | 1.22E-03 | transcription_start_site | + | 245554 | 245554 | -2099 | 24605 | AN6208 |
| 482  | CONTIG105 | 243243 | 243666 | 2.47 | 1.22E-03 | transcription_start_site | + | 246079 | 246079 | -2624 | 24606 | AN6208 |
| 1384 | CONTIG105 | 241728 | 242842 | 1.64 | 4.42E-02 | transcription_start_site | + | 244603 | 244603 | -2318 | 24602 | AN6208 |
| 1384 | CONTIG105 | 241728 | 242842 | 1.64 | 4.42E-02 | transcription_start_site | + | 244977 | 244977 | -2692 | 24603 | AN6208 |
| 1384 | CONTIG105 | 241728 | 242842 | 1.64 | 4.42E-02 | transcription_start_site | + | 245199 | 245199 | -2914 | 24604 | AN6208 |
| 1384 | CONTIG105 | 241728 | 242842 | 1.64 | 4.42E-02 | transcription_start_site | + | 245554 | 245554 | -3269 | 24605 | AN6208 |
| 1384 | CONTIG105 | 241728 | 242842 | 1.64 | 4.42E-02 | transcription_start_site | + | 246079 | 246079 | -3794 | 24606 | AN6208 |
| 2515 | CONTIG106 | 4446   | 5390   | 1.2  | 1.33E-01 | transcription_start_site | - | 3414   | 3414   | -1504 | 24634 | AN6220 |
| 2515 | CONTIG106 | 4446   | 5390   | 1.2  | 1.33E-01 | transcription_start_site | - | 2822   | 2822   | -2096 | 24635 | AN6220 |
| 2515 | CONTIG106 | 4446   | 5390   | 1.2  | 1.33E-01 | transcription_start_site | - | 2759   | 2759   | -2159 | 24636 | AN6220 |
| 2515 | CONTIG106 | 4446   | 5390   | 1.2  | 1.33E-01 | transcription_start_site | - | 2606   | 2606   | -2312 | 24637 | AN6220 |
| 1381 | CONTIG106 | 22884  | 23153  | 1.64 | 3.08E-02 | transcription_start_site | - | 19167  | 19167  | -3851 | 24640 | AN6223 |
| 1381 | CONTIG106 | 22884  | 23153  | 1.64 | 3.08E-02 | transcription_start_site | - | 19059  | 19059  | -3959 | 24641 | AN6223 |
| 1791 | CONTIG106 | 18319  | 20168  | 1.46 | 3.99E-02 | transcription_start_site | - | 19167  | 19167  | -76   | 24640 | AN6223 |
| 1791 | CONTIG106 | 18319  | 20168  | 1.46 | 3.99E-02 | transcription_start_site | - | 19059  | 19059  | -184  | 24641 | AN6223 |
| 1381 | CONTIG106 | 22884  | 23153  | 1.64 | 3.08E-02 | transcription_start_site | - | 21148  | 21148  | -1870 | 24642 | AN6224 |
| 1381 | CONTIG106 | 22884  | 23153  | 1.64 | 3.08E-02 | transcription_start_site | - | 21074  | 21074  | -1944 | 24643 | AN6224 |
| 1381 | CONTIG106 | 22884  | 23153  | 1.64 | 3.08E-02 | transcription_start_site | - | 20629  | 20629  | -2389 | 24644 | AN6224 |
| 1791 | CONTIG106 | 18319  | 20168  | 1.46 | 3.99E-02 | transcription_start_site | - | 20629  | 20629  | 1385  | 24644 | AN6224 |
| 1791 | CONTIG106 | 18319  | 20168  | 1.46 | 3.99E-02 | transcription_start_site | - | 21074  | 21074  | 1830  | 24643 | AN6224 |
| 1791 | CONTIG106 | 18319  | 20168  | 1.46 | 3.99E-02 | transcription_start_site | - | 21148  | 21148  | 1904  | 24642 | AN6224 |
| 1791 | CONTIG106 | 18319  | 20168  | 1.46 | 3.99E-02 | transcription_start_site | + | 21389  | 21389  | -2145 | 24645 | AN6225 |
| 1791 | CONTIG106 | 18319  | 20168  | 1.46 | 3.99E-02 | transcription_start_site | + | 21463  | 21463  | -2219 | 24646 | AN6225 |
| 1791 | CONTIG106 | 18319  | 20168  | 1.46 | 3.99E-02 | transcription_start_site | + | 21538  | 21538  | -2294 | 24647 | AN6225 |
| 1791 | CONTIG106 | 18319  | 20168  | 1.46 | 3.99E-02 | transcription_start_site | + | 21701  | 21701  | -2457 | 24648 | AN6225 |
| 2738 | CONTIG106 | 29789  | 30208  | 1.11 | 1.93E-01 | transcription_start_site | - | 28884  | 28884  | -1114 | 24649 | AN6227 |
| 2738 | CONTIG106 | 29789  | 30208  | 1.11 | 1.93E-01 | transcription_start_site | - | 28756  | 28756  | -1242 | 24650 | AN6227 |
| 2738 | CONTIG106 | 29789  | 30208  | 1.11 | 1.93E-01 | transcription_start_site | - | 28094  | 28094  | -1904 | 24651 | AN6227 |
| 2738 | CONTIG106 | 29789  | 30208  | 1.11 | 1.93E-01 | transcription_start_site | - | 29336  | 29336  | -662  | 24655 | AN6228 |
| 633  | CONTIG106 | 45242  | 45651  | 2.26 | 2.22E-03 | transcription_start_site | + | 47883  | 47883  | -2436 | 24656 | AN6230 |
| 633  | CONTIG106 | 45242  | 45651  | 2.26 | 2.22E-03 | transcription_start_site | + | 47975  | 47975  | -2528 | 24657 | AN6230 |
| 633  | CONTIG106 | 45242  | 45651  | 2.26 | 2.22E-03 | transcription_start_site | + | 49529  | 49529  | -4082 | 24658 | AN6230 |
| 1382 | CONTIG106 | 58203  | 58557  | 1.64 | 3.08E-02 | transcription_start_site | - | 55789  | 55789  | -2591 | 24662 | AN6232 |
| 1382 | CONTIG106 | 58203  | 58557  | 1.64 | 3.08E-02 | transcription_start_site | - | 55599  | 55599  | -2781 | 24663 | AN6232 |
| 1382 | CONTIG106 | 58203  | 58557  | 1.64 | 3.08E-02 | transcription_start_site | - | 55437  | 55437  | -2943 | 24664 | AN6232 |
| 1382 | CONTIG106 | 58203  | 58557  | 1.64 | 3.08E-02 | transcription_start_site | - | 55337  | 55337  | -3043 | 24665 | AN6232 |
| 1382 | CONTIG106 | 58203  | 58557  | 1.64 | 3.08E-02 | transcription_start_site | - | 55227  | 55227  | -3153 | 24666 | AN6232 |
| 1382 | CONTIG106 | 58203  | 58557  | 1.64 | 3.08E-02 | transcription_start_site | - | 55007  | 55007  | -3373 | 24667 | AN6232 |
| 1382 | CONTIG106 | 58203  | 58557  | 1.64 | 3.08E-02 | transcription_start_site | - | 54633  | 54633  | -3747 | 24668 | AN6232 |
| 1382 | CONTIG106 | 58203  | 58557  | 1.64 | 3.08E-02 | transcription_start_site | - | 54307  | 54307  | -4073 | 24669 | AN6232 |
| 1382 | CONTIG106 | 58203  | 58557  | 1.64 | 3.08E-02 | transcription_start_site | - | 54017  | 54017  | -4363 | 24670 | AN6232 |
| 363  | CONTIG106 | 64135  | 64414  | 2.66 | 2.16E-04 | transcription_start_site | - | 60766  | 60766  | -3508 | 24671 | AN6233 |
| 363  | CONTIG106 | 64135  | 64414  | 2.66 | 2.16E-04 | transcription_start_site | - | 60550  | 60550  | -3724 | 24672 | AN6233 |
| 862  | CONTIG106 | 64515  | 65154  | 2.04 | 6.61E-03 | transcription_start_site | - | 60766  | 60766  | -4068 | 24671 | AN6233 |
| 862  | CONTIG106 | 64515  | 65154  | 2.04 | 6.61E-03 | transcription_start_site | - | 60550  | 60550  | -4284 | 24672 | AN6233 |
| 1479 | CONTIG106 | 65710  | 66054  | 1.6  | 3.70E-02 | transcription_start_site | - | 60766  | 60766  | -5116 | 24671 | AN6233 |
| 862  | CONTIG106 | 64515  | 65154  | 2.04 | 6.61E-03 | transcription_start_site | - | 65722  | 65722  | 887   | 24674 | AN6234 |
| 1479 | CONTIG106 | 65710  | 66054  | 1.6  | 3.70E-02 | transcription_start_site | - | 65722  | 65722  | -160  | 24674 | AN6234 |
| 1479 | CONTIG106 | 65710  | 66054  | 1.6  | 3.70E-02 | transcription_start_site | - | 66748  | 66748  | 866   | 24673 | AN6234 |
| 363  | CONTIG106 | 64135  | 64414  | 2.66 | 2.16E-04 | transcription_start_site | + | 66971  | 66971  | -2696 | 24675 | AN6235 |
| 363  | CONTIG106 | 64135  | 64414  | 2.66 | 2.16E-04 | transcription_start_site | + | 67244  | 67244  | -2969 | 24676 | AN6235 |
| 862  | CONTIG106 | 64515  | 65154  | 2.04 | 6.61E-03 | transcription_start_site | + | 66971  | 66971  | -2136 | 24675 | AN6235 |
| 862  | CONTIG106 | 64515  | 65154  | 2.04 | 6.61E-03 | transcription_start_site | + | 67244  | 67244  | -2409 | 24676 | AN6235 |
| 1479 | CONTIG106 | 65710  | 66054  | 1.6  | 3.70E-02 | transcription_start_site | + | 66971  | 66971  | -1089 | 24675 | AN6235 |
| 1479 | CONTIG106 | 65710  | 66054  | 1.6  | 3.70E-02 | transcription_start_site | + | 67244  | 67244  | -1362 | 24676 | AN6235 |
| 1523 | CONTIG107 | 11784  | 12058  | 1.57 | 4.36E-02 | transcription_start_site | - | 11793  | 11793  | -128  | 24680 | AN6237 |

|      |           |       |       |      |          |                          |   |       |       |       |       |        |
|------|-----------|-------|-------|------|----------|--------------------------|---|-------|-------|-------|-------|--------|
| 1523 | CONTIG107 | 11784 | 12058 | 1.57 | 4.36E-02 | transcription_start_site | - | 11412 | 11412 | -509  | 24681 | AN6237 |
| 1523 | CONTIG107 | 11784 | 12058 | 1.57 | 4.36E-02 | transcription_start_site | - | 10430 | 10430 | -1491 | 24682 | AN6237 |
| 1523 | CONTIG107 | 11784 | 12058 | 1.57 | 4.36E-02 | transcription_start_site | + | 12151 | 12151 | -230  | 24683 | AN6238 |
| 1523 | CONTIG107 | 11784 | 12058 | 1.57 | 4.36E-02 | transcription_start_site | + | 12417 | 12417 | -496  | 24684 | AN6238 |
| 1523 | CONTIG107 | 11784 | 12058 | 1.57 | 4.36E-02 | transcription_start_site | + | 12735 | 12735 | -814  | 24685 | AN6238 |
| 1523 | CONTIG107 | 11784 | 12058 | 1.57 | 4.36E-02 | transcription_start_site | + | 13131 | 13131 | -1210 | 24686 | AN6238 |
| 1292 | CONTIG107 | 19284 | 19553 | 1.7  | 2.62E-02 | transcription_start_site | - | 15403 | 15403 | -4015 | 24687 | AN6239 |
| 1292 | CONTIG107 | 19284 | 19553 | 1.7  | 2.62E-02 | transcription_start_site | - | 15296 | 15296 | -4122 | 24688 | AN6239 |
| 1523 | CONTIG107 | 11784 | 12058 | 1.57 | 4.36E-02 | transcription_start_site | + | 16457 | 16457 | -4536 | 24689 | AN6240 |
| 1523 | CONTIG107 | 11784 | 12058 | 1.57 | 4.36E-02 | transcription_start_site | + | 16761 | 16761 | -4840 | 24690 | AN6240 |
| 1043 | CONTIG107 | 24459 | 24888 | 1.88 | 1.30E-02 | transcription_start_site | - | 19774 | 19774 | -4899 | 24691 | AN6241 |
| 1292 | CONTIG107 | 19284 | 19553 | 1.7  | 2.62E-02 | transcription_start_site | - | 19774 | 19774 | 355   | 24691 | AN6241 |
| 1292 | CONTIG107 | 19284 | 19553 | 1.7  | 2.62E-02 | transcription_start_site | - | 18933 | 18933 | -485  | 24692 | AN6241 |
| 1292 | CONTIG107 | 19284 | 19553 | 1.7  | 2.62E-02 | transcription_start_site | - | 18782 | 18782 | -636  | 24693 | AN6241 |
| 1043 | CONTIG107 | 24459 | 24888 | 1.88 | 1.30E-02 | transcription_start_site | - | 21625 | 21625 | -3048 | 24694 | AN6242 |
| 1043 | CONTIG107 | 24459 | 24888 | 1.88 | 1.30E-02 | transcription_start_site | - | 21112 | 21112 | -3561 | 24695 | AN6242 |
| 1043 | CONTIG107 | 24459 | 24888 | 1.88 | 1.30E-02 | transcription_start_site | - | 20743 | 20743 | -3930 | 24696 | AN6242 |
| 1043 | CONTIG107 | 24459 | 24888 | 1.88 | 1.30E-02 | transcription_start_site | - | 20591 | 20591 | -4082 | 24697 | AN6242 |
| 2483 | CONTIG107 | 26484 | 26765 | 1.21 | 1.44E-01 | transcription_start_site | - | 21625 | 21625 | -4999 | 24694 | AN6242 |
| 1043 | CONTIG107 | 24459 | 24888 | 1.88 | 1.30E-02 | transcription_start_site | + | 28048 | 28048 | -3374 | 24698 | AN6243 |
| 1043 | CONTIG107 | 24459 | 24888 | 1.88 | 1.30E-02 | transcription_start_site | + | 28268 | 28268 | -3594 | 24699 | AN6243 |
| 1043 | CONTIG107 | 24459 | 24888 | 1.88 | 1.30E-02 | transcription_start_site | + | 29063 | 29063 | -4389 | 24700 | AN6243 |
| 2191 | CONTIG107 | 27544 | 28119 | 1.3  | 9.26E-02 | transcription_start_site | + | 28048 | 28048 | -216  | 24698 | AN6243 |
| 2191 | CONTIG107 | 27544 | 28119 | 1.3  | 9.26E-02 | transcription_start_site | + | 28268 | 28268 | -436  | 24699 | AN6243 |
| 2191 | CONTIG107 | 27544 | 28119 | 1.3  | 9.26E-02 | transcription_start_site | + | 29063 | 29063 | -1231 | 24700 | AN6243 |
| 2483 | CONTIG107 | 26484 | 26765 | 1.21 | 1.44E-01 | transcription_start_site | + | 28048 | 28048 | -1423 | 24698 | AN6243 |
| 2483 | CONTIG107 | 26484 | 26765 | 1.21 | 1.44E-01 | transcription_start_site | + | 28268 | 28268 | -1643 | 24699 | AN6243 |
| 2483 | CONTIG107 | 26484 | 26765 | 1.21 | 1.44E-01 | transcription_start_site | + | 29063 | 29063 | -2438 | 24700 | AN6243 |
| 2191 | CONTIG107 | 27544 | 28119 | 1.3  | 9.26E-02 | transcription_start_site | + | 31567 | 31567 | -3735 | 24701 | AN6244 |
| 2191 | CONTIG107 | 27544 | 28119 | 1.3  | 9.26E-02 | transcription_start_site | + | 32178 | 32178 | -4346 | 24702 | AN6244 |
| 2483 | CONTIG107 | 26484 | 26765 | 1.21 | 1.44E-01 | transcription_start_site | + | 31567 | 31567 | -4942 | 24701 | AN6244 |
| 1293 | CONTIG107 | 33320 | 34644 | 1.7  | 2.62E-02 | transcription_start_site | - | 34039 | 34039 | 57    | 24703 | AN6245 |
| 1293 | CONTIG107 | 33320 | 34644 | 1.7  | 2.62E-02 | transcription_start_site | - | 33592 | 33592 | -390  | 24704 | AN6245 |
| 1293 | CONTIG107 | 33320 | 34644 | 1.7  | 2.62E-02 | transcription_start_site | + | 35262 | 35262 | -1280 | 24705 | AN6246 |
| 1293 | CONTIG107 | 33320 | 34644 | 1.7  | 2.62E-02 | transcription_start_site | + | 35538 | 35538 | -1556 | 24706 | AN6246 |
| 1293 | CONTIG107 | 33320 | 34644 | 1.7  | 2.62E-02 | transcription_start_site | + | 35686 | 35686 | -1704 | 24707 | AN6246 |
| 1293 | CONTIG107 | 33320 | 34644 | 1.7  | 2.62E-02 | transcription_start_site | + | 37178 | 37178 | -3196 | 24708 | AN6247 |
| 1293 | CONTIG107 | 33320 | 34644 | 1.7  | 2.62E-02 | transcription_start_site | + | 37799 | 37799 | -3817 | 24709 | AN6247 |
| 408  | CONTIG107 | 44785 | 45054 | 2.59 | 5.64E-04 | transcription_start_site | + | 44790 | 44790 | 129   | 24713 | AN6249 |
| 1524 | CONTIG107 | 48095 | 48354 | 1.57 | 4.36E-02 | transcription_start_site | - | 48246 | 48246 | 21    | 24714 | AN6250 |
| 1524 | CONTIG107 | 48095 | 48354 | 1.57 | 4.36E-02 | transcription_start_site | - | 47853 | 47853 | -371  | 24715 | AN6250 |
| 1524 | CONTIG107 | 48095 | 48354 | 1.57 | 4.36E-02 | transcription_start_site | - | 47746 | 47746 | -478  | 24716 | AN6250 |
| 1524 | CONTIG107 | 48095 | 48354 | 1.57 | 4.36E-02 | transcription_start_site | - | 47621 | 47621 | -603  | 24717 | AN6250 |
| 1524 | CONTIG107 | 48095 | 48354 | 1.57 | 4.36E-02 | transcription_start_site | - | 47506 | 47506 | -718  | 24718 | AN6250 |
| 1524 | CONTIG107 | 48095 | 48354 | 1.57 | 4.36E-02 | transcription_start_site | - | 47328 | 47328 | -896  | 24719 | AN6250 |
| 1524 | CONTIG107 | 48095 | 48354 | 1.57 | 4.36E-02 | transcription_start_site | - | 47118 | 47118 | -1106 | 24720 | AN6250 |
| 1524 | CONTIG107 | 48095 | 48354 | 1.57 | 4.36E-02 | transcription_start_site | - | 46838 | 46838 | -1386 | 24721 | AN6250 |
| 1524 | CONTIG107 | 48095 | 48354 | 1.57 | 4.36E-02 | transcription_start_site | - | 46680 | 46680 | -1544 | 24722 | AN6250 |
| 1524 | CONTIG107 | 48095 | 48354 | 1.57 | 4.36E-02 | transcription_start_site | - | 46532 | 46532 | -1692 | 24723 | AN6250 |
| 1524 | CONTIG107 | 48095 | 48354 | 1.57 | 4.36E-02 | transcription_start_site | - | 46179 | 46179 | -2045 | 24724 | AN6250 |
| 2715 | CONTIG107 | 48835 | 49339 | 1.12 | 1.93E-01 | transcription_start_site | - | 48246 | 48246 | -841  | 24714 | AN6250 |
| 2715 | CONTIG107 | 48835 | 49339 | 1.12 | 1.93E-01 | transcription_start_site | - | 47853 | 47853 | -1234 | 24715 | AN6250 |
| 2715 | CONTIG107 | 48835 | 49339 | 1.12 | 1.93E-01 | transcription_start_site | - | 47746 | 47746 | -1341 | 24716 | AN6250 |
| 2715 | CONTIG107 | 48835 | 49339 | 1.12 | 1.93E-01 | transcription_start_site | - | 47621 | 47621 | -1466 | 24717 | AN6250 |
| 2715 | CONTIG107 | 48835 | 49339 | 1.12 | 1.93E-01 | transcription_start_site | - | 47506 | 47506 | -1581 | 24718 | AN6250 |
| 2715 | CONTIG107 | 48835 | 49339 | 1.12 | 1.93E-01 | transcription_start_site | - | 47328 | 47328 | -1759 | 24719 | AN6250 |
| 2715 | CONTIG107 | 48835 | 49339 | 1.12 | 1.93E-01 | transcription_start_site | - | 47118 | 47118 | -1969 | 24720 | AN6250 |

|                |        |        |      |          |                          |   |        |        |       |       |        |
|----------------|--------|--------|------|----------|--------------------------|---|--------|--------|-------|-------|--------|
| 2715 CONTIG107 | 48835  | 49339  | 1.12 | 1.93E-01 | transcription_start_site | - | 46838  | 46838  | -2249 | 24721 | AN6250 |
| 2715 CONTIG107 | 48835  | 49339  | 1.12 | 1.93E-01 | transcription_start_site | - | 46680  | 46680  | -2407 | 24722 | AN6250 |
| 2715 CONTIG107 | 48835  | 49339  | 1.12 | 1.93E-01 | transcription_start_site | - | 46532  | 46532  | -2555 | 24723 | AN6250 |
| 2715 CONTIG107 | 48835  | 49339  | 1.12 | 1.93E-01 | transcription_start_site | - | 46179  | 46179  | -2908 | 24724 | AN6250 |
| 1524 CONTIG107 | 48095  | 48354  | 1.57 | 4.36E-02 | transcription_start_site | + | 51305  | 51305  | -3080 | 24725 | AN6251 |
| 1524 CONTIG107 | 48095  | 48354  | 1.57 | 4.36E-02 | transcription_start_site | + | 51464  | 51464  | -3239 | 24726 | AN6251 |
| 2715 CONTIG107 | 48835  | 49339  | 1.12 | 1.93E-01 | transcription_start_site | + | 51305  | 51305  | -2218 | 24725 | AN6251 |
| 2715 CONTIG107 | 48835  | 49339  | 1.12 | 1.93E-01 | transcription_start_site | + | 51464  | 51464  | -2377 | 24726 | AN6251 |
| 1524 CONTIG107 | 48095  | 48354  | 1.57 | 4.36E-02 | transcription_start_site | + | 52885  | 52885  | -4660 | 24727 | AN6252 |
| 1524 CONTIG107 | 48095  | 48354  | 1.57 | 4.36E-02 | transcription_start_site | + | 53042  | 53042  | -4817 | 24728 | AN6252 |
| 2715 CONTIG107 | 48835  | 49339  | 1.12 | 1.93E-01 | transcription_start_site | + | 52885  | 52885  | -3798 | 24727 | AN6252 |
| 2715 CONTIG107 | 48835  | 49339  | 1.12 | 1.93E-01 | transcription_start_site | + | 53042  | 53042  | -3955 | 24728 | AN6252 |
| 2715 CONTIG107 | 48835  | 49339  | 1.12 | 1.93E-01 | transcription_start_site | + | 53695  | 53695  | -4608 | 24729 | AN6252 |
| 884 CONTIG107  | 64220  | 65154  | 2.01 | 7.85E-03 | transcription_start_site | - | 59303  | 59303  | -5384 | 24735 | AN6255 |
| 884 CONTIG107  | 64220  | 65154  | 2.01 | 7.85E-03 | transcription_start_site | - | 61012  | 61012  | -3675 | 24740 | AN6256 |
| 884 CONTIG107  | 64220  | 65154  | 2.01 | 7.85E-03 | transcription_start_site | - | 60635  | 60635  | -4052 | 24741 | AN6256 |
| 884 CONTIG107  | 64220  | 65154  | 2.01 | 7.85E-03 | transcription_start_site | + | 65230  | 65230  | -543  | 24748 | AN6257 |
| 884 CONTIG107  | 64220  | 65154  | 2.01 | 7.85E-03 | transcription_start_site | + | 65584  | 65584  | -897  | 24749 | AN6257 |
| 884 CONTIG107  | 64220  | 65154  | 2.01 | 7.85E-03 | transcription_start_site | + | 69039  | 69039  | -4352 | 24751 | AN6259 |
| 884 CONTIG107  | 64220  | 65154  | 2.01 | 7.85E-03 | transcription_start_site | + | 69309  | 69309  | -4622 | 24752 | AN6259 |
| 884 CONTIG107  | 64220  | 65154  | 2.01 | 7.85E-03 | transcription_start_site | + | 69663  | 69663  | -4976 | 24753 | AN6259 |
| 2193 CONTIG107 | 82580  | 82939  | 1.3  | 1.08E-01 | transcription_start_site | - | 83411  | 83411  | 651   | 24758 | AN6262 |
| 934 CONTIG107  | 89701  | 89980  | 1.97 | 8.81E-03 | transcription_start_site | - | 86852  | 86852  | -2988 | 24759 | AN6263 |
| 934 CONTIG107  | 89701  | 89980  | 1.97 | 8.81E-03 | transcription_start_site | + | 90096  | 90096  | -255  | 24760 | AN6264 |
| 934 CONTIG107  | 89701  | 89980  | 1.97 | 8.81E-03 | transcription_start_site | + | 90297  | 90297  | -456  | 24761 | AN6264 |
| 934 CONTIG107  | 89701  | 89980  | 1.97 | 8.81E-03 | transcription_start_site | + | 90647  | 90647  | -806  | 24762 | AN6264 |
| 934 CONTIG107  | 89701  | 89980  | 1.97 | 8.81E-03 | transcription_start_site | + | 91081  | 91081  | -1240 | 24763 | AN6264 |
| 2622 CONTIG107 | 92796  | 93140  | 1.16 | 1.66E-01 | transcription_start_site | - | 93533  | 93533  | 565   | 24765 | AN6265 |
| 934 CONTIG107  | 89701  | 89980  | 1.97 | 8.81E-03 | transcription_start_site | + | 94579  | 94579  | -4738 | 24766 | AN6266 |
| 934 CONTIG107  | 89701  | 89980  | 1.97 | 8.81E-03 | transcription_start_site | + | 94750  | 94750  | -4909 | 24767 | AN6266 |
| 2622 CONTIG107 | 92796  | 93140  | 1.16 | 1.66E-01 | transcription_start_site | + | 94579  | 94579  | -1611 | 24766 | AN6266 |
| 2622 CONTIG107 | 92796  | 93140  | 1.16 | 1.66E-01 | transcription_start_site | + | 94750  | 94750  | -1782 | 24767 | AN6266 |
| 1369 CONTIG107 | 108621 | 108955 | 1.65 | 1.81E-02 | transcription_start_site | - | 108257 | 108257 | -531  | 24780 | AN6271 |
| 1369 CONTIG107 | 108621 | 108955 | 1.65 | 1.81E-02 | transcription_start_site | - | 108038 | 108038 | -750  | 24781 | AN6271 |
| 1369 CONTIG107 | 108621 | 108955 | 1.65 | 1.81E-02 | transcription_start_site | - | 107797 | 107797 | -991  | 24782 | AN6271 |
| 2716 CONTIG107 | 112351 | 112700 | 1.12 | 1.93E-01 | transcription_start_site | - | 108257 | 108257 | -4268 | 24780 | AN6271 |
| 2716 CONTIG107 | 112351 | 112700 | 1.12 | 1.93E-01 | transcription_start_site | - | 108038 | 108038 | -4487 | 24781 | AN6271 |
| 2716 CONTIG107 | 112351 | 112700 | 1.12 | 1.93E-01 | transcription_start_site | - | 107797 | 107797 | -4728 | 24782 | AN6271 |
| 1369 CONTIG107 | 108621 | 108955 | 1.65 | 1.81E-02 | transcription_start_site | + | 109125 | 109125 | -337  | 24783 | AN6272 |
| 1369 CONTIG107 | 108621 | 108955 | 1.65 | 1.81E-02 | transcription_start_site | + | 109250 | 109250 | -462  | 24784 | AN6272 |
| 1369 CONTIG107 | 108621 | 108955 | 1.65 | 1.81E-02 | transcription_start_site | + | 109730 | 109730 | -942  | 24785 | AN6272 |
| 1369 CONTIG107 | 108621 | 108955 | 1.65 | 1.81E-02 | transcription_start_site | + | 112351 | 112351 | -3563 | 24786 | AN6273 |
| 2716 CONTIG107 | 112351 | 112700 | 1.12 | 1.93E-01 | transcription_start_site | + | 112351 | 112351 | 174   | 24786 | AN6273 |
| 1744 CONTIG107 | 119106 | 119605 | 1.48 | 3.99E-02 | transcription_start_site | - | 114438 | 114438 | -4917 | 24787 | AN6274 |
| 2484 CONTIG107 | 114391 | 114725 | 1.21 | 1.44E-01 | transcription_start_site | - | 114438 | 114438 | -120  | 24787 | AN6274 |
| 2484 CONTIG107 | 114391 | 114725 | 1.21 | 1.44E-01 | transcription_start_site | - | 113388 | 113388 | -1170 | 24788 | AN6274 |
| 2484 CONTIG107 | 114391 | 114725 | 1.21 | 1.44E-01 | transcription_start_site | - | 113276 | 113276 | -1282 | 24789 | AN6274 |
| 2716 CONTIG107 | 112351 | 112700 | 1.12 | 1.93E-01 | transcription_start_site | - | 113276 | 113276 | 750   | 24789 | AN6274 |
| 2716 CONTIG107 | 112351 | 112700 | 1.12 | 1.93E-01 | transcription_start_site | - | 113388 | 113388 | 862   | 24788 | AN6274 |
| 1744 CONTIG107 | 119106 | 119605 | 1.48 | 3.99E-02 | transcription_start_site | - | 118085 | 118085 | -1270 | 24790 | AN6275 |
| 212 CONTIG107  | 123841 | 124270 | 2.91 | 0.00E+00 | transcription_start_site | - | 120099 | 120099 | -3956 | 24791 | AN6276 |
| 212 CONTIG107  | 123841 | 124270 | 2.91 | 0.00E+00 | transcription_start_site | - | 119880 | 119880 | -4175 | 24792 | AN6276 |
| 212 CONTIG107  | 123841 | 124270 | 2.91 | 0.00E+00 | transcription_start_site | - | 119752 | 119752 | -4303 | 24793 | AN6276 |
| 319 CONTIG107  | 124801 | 125248 | 2.73 | 0.00E+00 | transcription_start_site | - | 120099 | 120099 | -4925 | 24791 | AN6276 |
| 319 CONTIG107  | 124801 | 125248 | 2.73 | 0.00E+00 | transcription_start_site | - | 119880 | 119880 | -5144 | 24792 | AN6276 |
| 1744 CONTIG107 | 119106 | 119605 | 1.48 | 3.99E-02 | transcription_start_site | - | 119752 | 119752 | 396   | 24793 | AN6276 |
| 1744 CONTIG107 | 119106 | 119605 | 1.48 | 3.99E-02 | transcription_start_site | - | 119880 | 119880 | 524   | 24792 | AN6276 |

|      |           |        |        |      |          |                          |   |        |        |       |       |        |
|------|-----------|--------|--------|------|----------|--------------------------|---|--------|--------|-------|-------|--------|
| 1744 | CONTIG107 | 119106 | 119605 | 1.48 | 3.99E-02 | transcription_start_site | - | 120099 | 120099 | 743   | 24791 | AN6276 |
| 212  | CONTIG107 | 123841 | 124270 | 2.91 | 0.00E+00 | transcription_start_site | - | 122901 | 122901 | -1154 | 24794 | AN6277 |
| 212  | CONTIG107 | 123841 | 124270 | 2.91 | 0.00E+00 | transcription_start_site | - | 121374 | 121374 | -2681 | 24795 | AN6277 |
| 212  | CONTIG107 | 123841 | 124270 | 2.91 | 0.00E+00 | transcription_start_site | - | 121265 | 121265 | -2790 | 24796 | AN6277 |
| 319  | CONTIG107 | 124801 | 125248 | 2.73 | 0.00E+00 | transcription_start_site | - | 122901 | 122901 | -2123 | 24794 | AN6277 |
| 319  | CONTIG107 | 124801 | 125248 | 2.73 | 0.00E+00 | transcription_start_site | - | 121374 | 121374 | -3650 | 24795 | AN6277 |
| 319  | CONTIG107 | 124801 | 125248 | 2.73 | 0.00E+00 | transcription_start_site | - | 121265 | 121265 | -3759 | 24796 | AN6277 |
| 212  | CONTIG107 | 123841 | 124270 | 2.91 | 0.00E+00 | transcription_start_site | + | 125294 | 125294 | -1238 | 24797 | AN6278 |
| 212  | CONTIG107 | 123841 | 124270 | 2.91 | 0.00E+00 | transcription_start_site | + | 126250 | 126250 | -2194 | 24798 | AN6278 |
| 212  | CONTIG107 | 123841 | 124270 | 2.91 | 0.00E+00 | transcription_start_site | + | 126762 | 126762 | -2706 | 24799 | AN6278 |
| 212  | CONTIG107 | 123841 | 124270 | 2.91 | 0.00E+00 | transcription_start_site | + | 127027 | 127027 | -2971 | 24800 | AN6278 |
| 319  | CONTIG107 | 124801 | 125248 | 2.73 | 0.00E+00 | transcription_start_site | + | 125294 | 125294 | -269  | 24797 | AN6278 |
| 319  | CONTIG107 | 124801 | 125248 | 2.73 | 0.00E+00 | transcription_start_site | + | 126250 | 126250 | -1225 | 24798 | AN6278 |
| 319  | CONTIG107 | 124801 | 125248 | 2.73 | 0.00E+00 | transcription_start_site | + | 126762 | 126762 | -1737 | 24799 | AN6278 |
| 319  | CONTIG107 | 124801 | 125248 | 2.73 | 0.00E+00 | transcription_start_site | + | 127027 | 127027 | -2002 | 24800 | AN6278 |
| 583  | CONTIG107 | 129996 | 131245 | 2.33 | 0.00E+00 | transcription_start_site | - | 129687 | 129687 | -933  | 24801 | AN6279 |
| 583  | CONTIG107 | 129996 | 131245 | 2.33 | 0.00E+00 | transcription_start_site | - | 129534 | 129534 | -1086 | 24802 | AN6279 |
| 583  | CONTIG107 | 129996 | 131245 | 2.33 | 0.00E+00 | transcription_start_site | - | 129402 | 129402 | -1218 | 24803 | AN6279 |
| 583  | CONTIG107 | 129996 | 131245 | 2.33 | 0.00E+00 | transcription_start_site | - | 127689 | 127689 | -2931 | 24804 | AN6279 |
| 750  | CONTIG107 | 133876 | 134390 | 2.15 | 1.22E-03 | transcription_start_site | - | 129687 | 129687 | -4446 | 24801 | AN6279 |
| 750  | CONTIG107 | 133876 | 134390 | 2.15 | 1.22E-03 | transcription_start_site | - | 129534 | 129534 | -4599 | 24802 | AN6279 |
| 750  | CONTIG107 | 133876 | 134390 | 2.15 | 1.22E-03 | transcription_start_site | - | 129402 | 129402 | -4731 | 24803 | AN6279 |
| 1518 | CONTIG107 | 132171 | 132670 | 1.57 | 2.64E-02 | transcription_start_site | - | 129687 | 129687 | -2733 | 24801 | AN6279 |
| 1518 | CONTIG107 | 132171 | 132670 | 1.57 | 2.64E-02 | transcription_start_site | - | 129534 | 129534 | -2886 | 24802 | AN6279 |
| 1518 | CONTIG107 | 132171 | 132670 | 1.57 | 2.64E-02 | transcription_start_site | - | 129402 | 129402 | -3018 | 24803 | AN6279 |
| 1518 | CONTIG107 | 132171 | 132670 | 1.57 | 2.64E-02 | transcription_start_site | - | 127689 | 127689 | -4731 | 24804 | AN6279 |
| 583  | CONTIG107 | 129996 | 131245 | 2.33 | 0.00E+00 | transcription_start_site | - | 131732 | 131732 | 1111  | 24807 | AN6280 |
| 750  | CONTIG107 | 133876 | 134390 | 2.15 | 1.22E-03 | transcription_start_site | - | 133737 | 133737 | -396  | 24805 | AN6280 |
| 750  | CONTIG107 | 133876 | 134390 | 2.15 | 1.22E-03 | transcription_start_site | - | 133473 | 133473 | -660  | 24806 | AN6280 |
| 750  | CONTIG107 | 133876 | 134390 | 2.15 | 1.22E-03 | transcription_start_site | - | 131732 | 131732 | -2401 | 24807 | AN6280 |
| 1518 | CONTIG107 | 132171 | 132670 | 1.57 | 2.64E-02 | transcription_start_site | - | 131732 | 131732 | -688  | 24807 | AN6280 |
| 1518 | CONTIG107 | 132171 | 132670 | 1.57 | 2.64E-02 | transcription_start_site | - | 133473 | 133473 | 1052  | 24806 | AN6280 |
| 586  | CONTIG107 | 146342 | 146916 | 2.33 | 1.80E-03 | transcription_start_site | - | 147763 | 147763 | 1134  | 24812 | AN6284 |
| 586  | CONTIG107 | 146342 | 146916 | 2.33 | 1.80E-03 | transcription_start_site | + | 149529 | 149529 | -2900 | 24813 | AN6285 |
| 586  | CONTIG107 | 146342 | 146916 | 2.33 | 1.80E-03 | transcription_start_site | + | 149632 | 149632 | -3003 | 24814 | AN6285 |
| 586  | CONTIG107 | 146342 | 146916 | 2.33 | 1.80E-03 | transcription_start_site | + | 149814 | 149814 | -3185 | 24815 | AN6285 |
| 586  | CONTIG107 | 146342 | 146916 | 2.33 | 1.80E-03 | transcription_start_site | + | 150030 | 150030 | -3401 | 24816 | AN6285 |
| 586  | CONTIG107 | 146342 | 146916 | 2.33 | 1.80E-03 | transcription_start_site | + | 151015 | 151015 | -4386 | 24817 | AN6286 |
| 586  | CONTIG107 | 146342 | 146916 | 2.33 | 1.80E-03 | transcription_start_site | + | 151243 | 151243 | -4614 | 24818 | AN6286 |
| 586  | CONTIG107 | 146342 | 146916 | 2.33 | 1.80E-03 | transcription_start_site | + | 151357 | 151357 | -4728 | 24819 | AN6286 |
| 586  | CONTIG107 | 146342 | 146916 | 2.33 | 1.80E-03 | transcription_start_site | + | 151427 | 151427 | -4798 | 24820 | AN6286 |
| 586  | CONTIG107 | 146342 | 146916 | 2.33 | 1.80E-03 | transcription_start_site | + | 151614 | 151614 | -4985 | 24821 | AN6286 |
| 586  | CONTIG107 | 146342 | 146916 | 2.33 | 1.80E-03 | transcription_start_site | + | 151766 | 151766 | -5137 | 24822 | AN6286 |
| 2623 | CONTIG107 | 155942 | 156216 | 1.16 | 1.66E-01 | transcription_start_site | - | 155961 | 155961 | -118  | 24827 | AN6287 |
| 2623 | CONTIG107 | 155942 | 156216 | 1.16 | 1.66E-01 | transcription_start_site | - | 156298 | 156298 | 219   | 24826 | AN6287 |
| 2623 | CONTIG107 | 155942 | 156216 | 1.16 | 1.66E-01 | transcription_start_site | - | 155547 | 155547 | -532  | 24828 | AN6287 |
| 2623 | CONTIG107 | 155942 | 156216 | 1.16 | 1.66E-01 | transcription_start_site | - | 155399 | 155399 | -680  | 24829 | AN6287 |
| 2623 | CONTIG107 | 155942 | 156216 | 1.16 | 1.66E-01 | transcription_start_site | - | 156931 | 156931 | 852   | 24834 | AN6288 |
| 2623 | CONTIG107 | 155942 | 156216 | 1.16 | 1.66E-01 | transcription_start_site | - | 157120 | 157120 | 1041  | 24833 | AN6288 |
| 1455 | CONTIG107 | 177382 | 177656 | 1.61 | 3.70E-02 | transcription_start_site | - | 172777 | 172777 | -4742 | 24847 | AN6293 |
| 1455 | CONTIG107 | 177382 | 177656 | 1.61 | 3.70E-02 | transcription_start_site | - | 172451 | 172451 | -5068 | 24848 | AN6293 |
| 1455 | CONTIG107 | 177382 | 177656 | 1.61 | 3.70E-02 | transcription_start_site | - | 174706 | 174706 | -2813 | 24856 | AN6294 |
| 1455 | CONTIG107 | 177382 | 177656 | 1.61 | 3.70E-02 | transcription_start_site | - | 174382 | 174382 | -3137 | 24857 | AN6294 |
| 1455 | CONTIG107 | 177382 | 177656 | 1.61 | 3.70E-02 | transcription_start_site | - | 174243 | 174243 | -3276 | 24858 | AN6294 |
| 1455 | CONTIG107 | 177382 | 177656 | 1.61 | 3.70E-02 | transcription_start_site | - | 174027 | 174027 | -3492 | 24859 | AN6294 |
| 1455 | CONTIG107 | 177382 | 177656 | 1.61 | 3.70E-02 | transcription_start_site | - | 173866 | 173866 | -3653 | 24860 | AN6294 |
| 1455 | CONTIG107 | 177382 | 177656 | 1.61 | 3.70E-02 | transcription_start_site | - | 176712 | 176712 | -807  | 24861 | AN6295 |



|      |           |        |        |      |          |                          |   |        |        |       |       |        |
|------|-----------|--------|--------|------|----------|--------------------------|---|--------|--------|-------|-------|--------|
| 1455 | CONTIG107 | 177382 | 177656 | 1.61 | 3.70E-02 | transcription_start_site | - | 176548 | 176548 | -971  | 24862 | AN6295 |
| 1455 | CONTIG107 | 177382 | 177656 | 1.61 | 3.70E-02 | transcription_start_site | + | 178041 | 178041 | -522  | 24863 | AN6296 |
| 1455 | CONTIG107 | 177382 | 177656 | 1.61 | 3.70E-02 | transcription_start_site | + | 178208 | 178208 | -689  | 24864 | AN6296 |
| 1455 | CONTIG107 | 177382 | 177656 | 1.61 | 3.70E-02 | transcription_start_site | + | 178457 | 178457 | -938  | 24865 | AN6296 |
| 1455 | CONTIG107 | 177382 | 177656 | 1.61 | 3.70E-02 | transcription_start_site | + | 179437 | 179437 | -1918 | 24866 | AN6296 |
| 1455 | CONTIG107 | 177382 | 177656 | 1.61 | 3.70E-02 | transcription_start_site | + | 179793 | 179793 | -2274 | 24867 | AN6296 |
| 1455 | CONTIG107 | 177382 | 177656 | 1.61 | 3.70E-02 | transcription_start_site | + | 180211 | 180211 | -2692 | 24868 | AN6297 |
| 1455 | CONTIG107 | 177382 | 177656 | 1.61 | 3.70E-02 | transcription_start_site | + | 180448 | 180448 | -2929 | 24869 | AN6297 |
| 1455 | CONTIG107 | 177382 | 177656 | 1.61 | 3.70E-02 | transcription_start_site | + | 180597 | 180597 | -3078 | 24870 | AN6297 |
| 1455 | CONTIG107 | 177382 | 177656 | 1.61 | 3.70E-02 | transcription_start_site | + | 181096 | 181096 | -3577 | 24871 | AN6297 |
| 1455 | CONTIG107 | 177382 | 177656 | 1.61 | 3.70E-02 | transcription_start_site | + | 182124 | 182124 | -4605 | 24872 | AN6298 |
| 1455 | CONTIG107 | 177382 | 177656 | 1.61 | 3.70E-02 | transcription_start_site | + | 182558 | 182558 | -5039 | 24873 | AN6298 |
| 2079 | CONTIG107 | 182260 | 182764 | 1.34 | 7.51E-02 | transcription_start_site | + | 182558 | 182558 | -46   | 24873 | AN6298 |
| 2079 | CONTIG107 | 182260 | 182764 | 1.34 | 7.51E-02 | transcription_start_site | + | 182124 | 182124 | 388   | 24872 | AN6298 |
| 2079 | CONTIG107 | 182260 | 182764 | 1.34 | 7.51E-02 | transcription_start_site | + | 186784 | 186784 | -4272 | 24876 | AN6300 |
| 2079 | CONTIG107 | 182260 | 182764 | 1.34 | 7.51E-02 | transcription_start_site | + | 186925 | 186925 | -4413 | 24877 | AN6300 |
| 2079 | CONTIG107 | 182260 | 182764 | 1.34 | 7.51E-02 | transcription_start_site | + | 187599 | 187599 | -5087 | 24878 | AN6300 |
| 622  | CONTIG107 | 198085 | 198439 | 2.28 | 2.22E-03 | transcription_start_site | + | 198695 | 198695 | -433  | 24894 | AN6305 |
| 622  | CONTIG107 | 198085 | 198439 | 2.28 | 2.22E-03 | transcription_start_site | + | 199515 | 199515 | -1253 | 24895 | AN6305 |
| 622  | CONTIG107 | 198085 | 198439 | 2.28 | 2.22E-03 | transcription_start_site | + | 199821 | 199821 | -1559 | 24896 | AN6305 |
| 622  | CONTIG107 | 198085 | 198439 | 2.28 | 2.22E-03 | transcription_start_site | + | 200247 | 200247 | -1985 | 24897 | AN6305 |
| 800  | CONTIG107 | 198770 | 199044 | 2.1  | 5.20E-03 | transcription_start_site | + | 198695 | 198695 | 212   | 24894 | AN6305 |
| 800  | CONTIG107 | 198770 | 199044 | 2.1  | 5.20E-03 | transcription_start_site | + | 199515 | 199515 | -608  | 24895 | AN6305 |
| 800  | CONTIG107 | 198770 | 199044 | 2.1  | 5.20E-03 | transcription_start_site | + | 199821 | 199821 | -914  | 24896 | AN6305 |
| 800  | CONTIG107 | 198770 | 199044 | 2.1  | 5.20E-03 | transcription_start_site | + | 200247 | 200247 | -1340 | 24897 | AN6305 |
| 622  | CONTIG107 | 198085 | 198439 | 2.28 | 2.22E-03 | transcription_start_site | + | 202158 | 202158 | -3896 | 24900 | AN6307 |
| 622  | CONTIG107 | 198085 | 198439 | 2.28 | 2.22E-03 | transcription_start_site | + | 202313 | 202313 | -4051 | 24901 | AN6307 |
| 622  | CONTIG107 | 198085 | 198439 | 2.28 | 2.22E-03 | transcription_start_site | + | 202400 | 202400 | -4138 | 24902 | AN6307 |
| 622  | CONTIG107 | 198085 | 198439 | 2.28 | 2.22E-03 | transcription_start_site | + | 202551 | 202551 | -4289 | 24903 | AN6307 |
| 622  | CONTIG107 | 198085 | 198439 | 2.28 | 2.22E-03 | transcription_start_site | + | 202686 | 202686 | -4424 | 24904 | AN6307 |
| 622  | CONTIG107 | 198085 | 198439 | 2.28 | 2.22E-03 | transcription_start_site | + | 203003 | 203003 | -4741 | 24905 | AN6307 |
| 800  | CONTIG107 | 198770 | 199044 | 2.1  | 5.20E-03 | transcription_start_site | + | 202158 | 202158 | -3251 | 24900 | AN6307 |
| 800  | CONTIG107 | 198770 | 199044 | 2.1  | 5.20E-03 | transcription_start_site | + | 202313 | 202313 | -3406 | 24901 | AN6307 |
| 800  | CONTIG107 | 198770 | 199044 | 2.1  | 5.20E-03 | transcription_start_site | + | 202400 | 202400 | -3493 | 24902 | AN6307 |
| 800  | CONTIG107 | 198770 | 199044 | 2.1  | 5.20E-03 | transcription_start_site | + | 202551 | 202551 | -3644 | 24903 | AN6307 |
| 800  | CONTIG107 | 198770 | 199044 | 2.1  | 5.20E-03 | transcription_start_site | + | 202686 | 202686 | -3779 | 24904 | AN6307 |
| 800  | CONTIG107 | 198770 | 199044 | 2.1  | 5.20E-03 | transcription_start_site | + | 203003 | 203003 | -4096 | 24905 | AN6307 |
| 1525 | CONTIG107 | 237158 | 237437 | 1.57 | 4.36E-02 | transcription_start_site | - | 233389 | 233389 | -3908 | 24919 | AN6315 |
| 1525 | CONTIG107 | 237158 | 237437 | 1.57 | 4.36E-02 | transcription_start_site | - | 232814 | 232814 | -4483 | 24920 | AN6315 |
| 1525 | CONTIG107 | 237158 | 237437 | 1.57 | 4.36E-02 | transcription_start_site | - | 232507 | 232507 | -4790 | 24921 | AN6315 |
| 1525 | CONTIG107 | 237158 | 237437 | 1.57 | 4.36E-02 | transcription_start_site | + | 237224 | 237224 | 73    | 24926 | AN6316 |
| 430  | CONTIG107 | 245037 | 245397 | 2.55 | 8.69E-04 | transcription_start_site | - | 243562 | 243562 | -1655 | 24927 | AN6317 |
| 430  | CONTIG107 | 245037 | 245397 | 2.55 | 8.69E-04 | transcription_start_site | - | 243228 | 243228 | -1989 | 24928 | AN6317 |
| 1525 | CONTIG107 | 237158 | 237437 | 1.57 | 4.36E-02 | transcription_start_site | - | 238291 | 238291 | 993   | 24930 | AN6317 |
| 430  | CONTIG107 | 245037 | 245397 | 2.55 | 8.69E-04 | transcription_start_site | + | 246085 | 246085 | -868  | 24931 | AN6318 |
| 430  | CONTIG107 | 245037 | 245397 | 2.55 | 8.69E-04 | transcription_start_site | + | 246254 | 246254 | -1037 | 24932 | AN6318 |
| 430  | CONTIG107 | 245037 | 245397 | 2.55 | 8.69E-04 | transcription_start_site | + | 246498 | 246498 | -1281 | 24933 | AN6318 |
| 2194 | CONTIG107 | 275562 | 275906 | 1.3  | 1.08E-01 | transcription_start_site | - | 273011 | 273011 | -2723 | 24969 | AN6325 |
| 2194 | CONTIG107 | 275562 | 275906 | 1.3  | 1.08E-01 | transcription_start_site | - | 272759 | 272759 | -2975 | 24970 | AN6325 |
| 2194 | CONTIG107 | 275562 | 275906 | 1.3  | 1.08E-01 | transcription_start_site | - | 272237 | 272237 | -3497 | 24971 | AN6325 |
| 2714 | CONTIG107 | 277443 | 278318 | 1.12 | 1.79E-01 | transcription_start_site | - | 273011 | 273011 | -4869 | 24969 | AN6325 |
| 2714 | CONTIG107 | 277443 | 278318 | 1.12 | 1.79E-01 | transcription_start_site | - | 272759 | 272759 | -5121 | 24970 | AN6325 |
| 2719 | CONTIG107 | 276392 | 277418 | 1.12 | 1.99E-01 | transcription_start_site | - | 273011 | 273011 | -3894 | 24969 | AN6325 |
| 2719 | CONTIG107 | 276392 | 277418 | 1.12 | 1.99E-01 | transcription_start_site | - | 272759 | 272759 | -4146 | 24970 | AN6325 |
| 2719 | CONTIG107 | 276392 | 277418 | 1.12 | 1.99E-01 | transcription_start_site | - | 272237 | 272237 | -4668 | 24971 | AN6325 |
| 1638 | CONTIG107 | 282764 | 283119 | 1.52 | 5.22E-02 | transcription_start_site | - | 284054 | 284054 | 1112  | 24973 | AN6327 |
| 1638 | CONTIG107 | 282764 | 283119 | 1.52 | 5.22E-02 | transcription_start_site | + | 287266 | 287266 | -4324 | 24977 | AN6329 |

|      |           |        |        |      |          |                          |   |        |        |       |       |        |
|------|-----------|--------|--------|------|----------|--------------------------|---|--------|--------|-------|-------|--------|
| 1638 | CONTIG107 | 282764 | 283119 | 1.52 | 5.22E-02 | transcription_start_site | + | 287376 | 287376 | -4434 | 24978 | AN6329 |
| 1638 | CONTIG107 | 282764 | 283119 | 1.52 | 5.22E-02 | transcription_start_site | + | 287604 | 287604 | -4662 | 24979 | AN6329 |
| 1638 | CONTIG107 | 282764 | 283119 | 1.52 | 5.22E-02 | transcription_start_site | + | 288073 | 288073 | -5131 | 24980 | AN6329 |
| 2192 | CONTIG107 | 297843 | 298414 | 1.3  | 9.26E-02 | transcription_start_site | + | 298778 | 298778 | -649  | 24981 | AN6330 |
| 2192 | CONTIG107 | 297843 | 298414 | 1.3  | 9.26E-02 | transcription_start_site | + | 298865 | 298865 | -736  | 24982 | AN6330 |
| 2192 | CONTIG107 | 297843 | 298414 | 1.3  | 9.26E-02 | transcription_start_site | + | 298972 | 298972 | -843  | 24983 | AN6330 |
| 2192 | CONTIG107 | 297843 | 298414 | 1.3  | 9.26E-02 | transcription_start_site | + | 299085 | 299085 | -956  | 24984 | AN6330 |
| 2192 | CONTIG107 | 297843 | 298414 | 1.3  | 9.26E-02 | transcription_start_site | + | 301575 | 301575 | -3446 | 24985 | AN6330 |
| 2192 | CONTIG107 | 297843 | 298414 | 1.3  | 9.26E-02 | transcription_start_site | + | 302306 | 302306 | -4177 | 24986 | AN6331 |
| 2192 | CONTIG107 | 297843 | 298414 | 1.3  | 9.26E-02 | transcription_start_site | + | 302435 | 302435 | -4306 | 24987 | AN6331 |
| 2192 | CONTIG107 | 297843 | 298414 | 1.3  | 9.26E-02 | transcription_start_site | + | 302631 | 302631 | -4502 | 24988 | AN6331 |
| 2192 | CONTIG107 | 297843 | 298414 | 1.3  | 9.26E-02 | transcription_start_site | + | 303300 | 303300 | -5171 | 24989 | AN6331 |
| 2611 | CONTIG107 | 314026 | 315055 | 1.16 | 1.11E-01 | transcription_start_site | - | 312419 | 312419 | -2121 | 24995 | AN6334 |
| 2611 | CONTIG107 | 314026 | 315055 | 1.16 | 1.11E-01 | transcription_start_site | - | 312276 | 312276 | -2264 | 24996 | AN6334 |
| 2611 | CONTIG107 | 314026 | 315055 | 1.16 | 1.11E-01 | transcription_start_site | - | 312134 | 312134 | -2406 | 24997 | AN6334 |
| 2611 | CONTIG107 | 314026 | 315055 | 1.16 | 1.11E-01 | transcription_start_site | - | 311990 | 311990 | -2550 | 24998 | AN6334 |
| 2611 | CONTIG107 | 314026 | 315055 | 1.16 | 1.11E-01 | transcription_start_site | + | 313674 | 313674 | 866   | 25000 | AN6335 |
| 1234 | CONTIG107 | 330244 | 330743 | 1.74 | 2.12E-02 | transcription_start_site | - | 330140 | 330140 | -353  | 25020 | AN6340 |
| 1234 | CONTIG107 | 330244 | 330743 | 1.74 | 2.12E-02 | transcription_start_site | - | 330863 | 330863 | 369   | 25019 | AN6340 |
| 1234 | CONTIG107 | 330244 | 330743 | 1.74 | 2.12E-02 | transcription_start_site | - | 329956 | 329956 | -537  | 25021 | AN6340 |
| 1234 | CONTIG107 | 330244 | 330743 | 1.74 | 2.12E-02 | transcription_start_site | - | 331035 | 331035 | 541   | 25018 | AN6340 |
| 1234 | CONTIG107 | 330244 | 330743 | 1.74 | 2.12E-02 | transcription_start_site | - | 331107 | 331107 | 613   | 25017 | AN6340 |
| 1234 | CONTIG107 | 330244 | 330743 | 1.74 | 2.12E-02 | transcription_start_site | - | 328342 | 328342 | -2151 | 25022 | AN6340 |
| 1234 | CONTIG107 | 330244 | 330743 | 1.74 | 2.12E-02 | transcription_start_site | + | 331766 | 331766 | -1272 | 25023 | AN6341 |
| 1234 | CONTIG107 | 330244 | 330743 | 1.74 | 2.12E-02 | transcription_start_site | + | 331848 | 331848 | -1354 | 25024 | AN6341 |
| 1234 | CONTIG107 | 330244 | 330743 | 1.74 | 2.12E-02 | transcription_start_site | + | 331932 | 331932 | -1438 | 25025 | AN6341 |
| 1234 | CONTIG107 | 330244 | 330743 | 1.74 | 2.12E-02 | transcription_start_site | + | 332049 | 332049 | -1555 | 25026 | AN6341 |
| 1234 | CONTIG107 | 330244 | 330743 | 1.74 | 2.12E-02 | transcription_start_site | + | 332249 | 332249 | -1755 | 25027 | AN6341 |
| 1234 | CONTIG107 | 330244 | 330743 | 1.74 | 2.12E-02 | transcription_start_site | + | 332355 | 332355 | -1861 | 25028 | AN6341 |
| 1234 | CONTIG107 | 330244 | 330743 | 1.74 | 2.12E-02 | transcription_start_site | + | 332513 | 332513 | -2019 | 25029 | AN6341 |
| 1234 | CONTIG107 | 330244 | 330743 | 1.74 | 2.12E-02 | transcription_start_site | + | 333735 | 333735 | -3241 | 25030 | AN6341 |
| 261  | CONTIG107 | 338857 | 339133 | 2.82 | 0.00E+00 | transcription_start_site | - | 337961 | 337961 | -1034 | 25031 | AN6342 |
| 261  | CONTIG107 | 338857 | 339133 | 2.82 | 0.00E+00 | transcription_start_site | - | 337853 | 337853 | -1142 | 25032 | AN6342 |
| 261  | CONTIG107 | 338857 | 339133 | 2.82 | 0.00E+00 | transcription_start_site | - | 337690 | 337690 | -1305 | 25033 | AN6342 |
| 261  | CONTIG107 | 338857 | 339133 | 2.82 | 0.00E+00 | transcription_start_site | - | 337251 | 337251 | -1744 | 25034 | AN6342 |
| 261  | CONTIG107 | 338857 | 339133 | 2.82 | 0.00E+00 | transcription_start_site | - | 336926 | 336926 | -2069 | 25035 | AN6342 |
| 261  | CONTIG107 | 338857 | 339133 | 2.82 | 0.00E+00 | transcription_start_site | - | 335848 | 335848 | -3147 | 25036 | AN6342 |
| 651  | CONTIG107 | 339467 | 339813 | 2.24 | 3.03E-03 | transcription_start_site | - | 337961 | 337961 | -1679 | 25031 | AN6342 |
| 651  | CONTIG107 | 339467 | 339813 | 2.24 | 3.03E-03 | transcription_start_site | - | 337853 | 337853 | -1787 | 25032 | AN6342 |
| 651  | CONTIG107 | 339467 | 339813 | 2.24 | 3.03E-03 | transcription_start_site | - | 337690 | 337690 | -1950 | 25033 | AN6342 |
| 651  | CONTIG107 | 339467 | 339813 | 2.24 | 3.03E-03 | transcription_start_site | - | 337251 | 337251 | -2389 | 25034 | AN6342 |
| 651  | CONTIG107 | 339467 | 339813 | 2.24 | 3.03E-03 | transcription_start_site | - | 336926 | 336926 | -2714 | 25035 | AN6342 |
| 651  | CONTIG107 | 339467 | 339813 | 2.24 | 3.03E-03 | transcription_start_site | - | 335848 | 335848 | -3792 | 25036 | AN6342 |
| 651  | CONTIG107 | 339467 | 339813 | 2.24 | 3.03E-03 | transcription_start_site | + | 344634 | 344634 | -4994 | 25037 | AN6344 |
| 1456 | CONTIG107 | 349294 | 349628 | 1.61 | 3.70E-02 | transcription_start_site | - | 348858 | 348858 | -603  | 25044 | AN6346 |
| 1456 | CONTIG107 | 349294 | 349628 | 1.61 | 3.70E-02 | transcription_start_site | - | 350327 | 350327 | 866   | 25043 | AN6346 |
| 1456 | CONTIG107 | 349294 | 349628 | 1.61 | 3.70E-02 | transcription_start_site | - | 350473 | 350473 | 1012  | 25042 | AN6346 |
| 1748 | CONTIG107 | 353259 | 353546 | 1.48 | 5.88E-02 | transcription_start_site | - | 350473 | 350473 | -2929 | 25042 | AN6346 |
| 1748 | CONTIG107 | 353259 | 353546 | 1.48 | 5.88E-02 | transcription_start_site | - | 350327 | 350327 | -3075 | 25043 | AN6346 |
| 1748 | CONTIG107 | 353259 | 353546 | 1.48 | 5.88E-02 | transcription_start_site | - | 348858 | 348858 | -4544 | 25044 | AN6346 |
| 2081 | CONTIG107 | 355204 | 355553 | 1.34 | 9.24E-02 | transcription_start_site | - | 350473 | 350473 | -4905 | 25042 | AN6346 |
| 2081 | CONTIG107 | 355204 | 355553 | 1.34 | 9.24E-02 | transcription_start_site | - | 350327 | 350327 | -5051 | 25043 | AN6346 |
| 2485 | CONTIG107 | 352369 | 353003 | 1.21 | 1.44E-01 | transcription_start_site | - | 350473 | 350473 | -2213 | 25042 | AN6346 |
| 2485 | CONTIG107 | 352369 | 353003 | 1.21 | 1.44E-01 | transcription_start_site | - | 350327 | 350327 | -2359 | 25043 | AN6346 |
| 2485 | CONTIG107 | 352369 | 353003 | 1.21 | 1.44E-01 | transcription_start_site | - | 348858 | 348858 | -3828 | 25044 | AN6346 |
| 1748 | CONTIG107 | 353259 | 353546 | 1.48 | 5.88E-02 | transcription_start_site | - | 353053 | 353053 | -349  | 25045 | AN6347 |
| 1748 | CONTIG107 | 353259 | 353546 | 1.48 | 5.88E-02 | transcription_start_site | - | 351525 | 351525 | -1877 | 25046 | AN6347 |

|      |           |        |        |      |          |                          |   |        |        |       |       |        |
|------|-----------|--------|--------|------|----------|--------------------------|---|--------|--------|-------|-------|--------|
| 2081 | CONTIG107 | 355204 | 355553 | 1.34 | 9.24E-02 | transcription_start_site | - | 353053 | 353053 | -2325 | 25045 | AN6347 |
| 2081 | CONTIG107 | 355204 | 355553 | 1.34 | 9.24E-02 | transcription_start_site | - | 351525 | 351525 | -3853 | 25046 | AN6347 |
| 2485 | CONTIG107 | 352369 | 353003 | 1.21 | 1.44E-01 | transcription_start_site | - | 353053 | 353053 | 367   | 25045 | AN6347 |
| 2485 | CONTIG107 | 352369 | 353003 | 1.21 | 1.44E-01 | transcription_start_site | - | 351525 | 351525 | -1161 | 25046 | AN6347 |
| 1748 | CONTIG107 | 353259 | 353546 | 1.48 | 5.88E-02 | transcription_start_site | - | 354484 | 354484 | 1081  | 25048 | AN6348 |
| 2081 | CONTIG107 | 355204 | 355553 | 1.34 | 9.24E-02 | transcription_start_site | - | 355134 | 355134 | -244  | 25047 | AN6348 |
| 2081 | CONTIG107 | 355204 | 355553 | 1.34 | 9.24E-02 | transcription_start_site | - | 354484 | 354484 | -894  | 25048 | AN6348 |
| 1748 | CONTIG107 | 353259 | 353546 | 1.48 | 5.88E-02 | transcription_start_site | + | 355527 | 355527 | -2124 | 25049 | AN6349 |
| 1748 | CONTIG107 | 353259 | 353546 | 1.48 | 5.88E-02 | transcription_start_site | + | 355751 | 355751 | -2348 | 25050 | AN6349 |
| 1748 | CONTIG107 | 353259 | 353546 | 1.48 | 5.88E-02 | transcription_start_site | + | 356508 | 356508 | -3105 | 25051 | AN6349 |
| 1748 | CONTIG107 | 353259 | 353546 | 1.48 | 5.88E-02 | transcription_start_site | + | 356760 | 356760 | -3357 | 25052 | AN6349 |
| 1748 | CONTIG107 | 353259 | 353546 | 1.48 | 5.88E-02 | transcription_start_site | + | 357771 | 357771 | -4368 | 25053 | AN6349 |
| 1748 | CONTIG107 | 353259 | 353546 | 1.48 | 5.88E-02 | transcription_start_site | + | 358059 | 358059 | -4656 | 25054 | AN6349 |
| 1748 | CONTIG107 | 353259 | 353546 | 1.48 | 5.88E-02 | transcription_start_site | + | 358338 | 358338 | -4935 | 25055 | AN6349 |
| 2081 | CONTIG107 | 355204 | 355553 | 1.34 | 9.24E-02 | transcription_start_site | + | 355527 | 355527 | -148  | 25049 | AN6349 |
| 2081 | CONTIG107 | 355204 | 355553 | 1.34 | 9.24E-02 | transcription_start_site | + | 355751 | 355751 | -372  | 25050 | AN6349 |
| 2081 | CONTIG107 | 355204 | 355553 | 1.34 | 9.24E-02 | transcription_start_site | + | 356508 | 356508 | -1129 | 25051 | AN6349 |
| 2081 | CONTIG107 | 355204 | 355553 | 1.34 | 9.24E-02 | transcription_start_site | + | 356760 | 356760 | -1381 | 25052 | AN6349 |
| 2081 | CONTIG107 | 355204 | 355553 | 1.34 | 9.24E-02 | transcription_start_site | + | 357771 | 357771 | -2392 | 25053 | AN6349 |
| 2081 | CONTIG107 | 355204 | 355553 | 1.34 | 9.24E-02 | transcription_start_site | + | 358059 | 358059 | -2680 | 25054 | AN6349 |
| 2081 | CONTIG107 | 355204 | 355553 | 1.34 | 9.24E-02 | transcription_start_site | + | 358338 | 358338 | -2959 | 25055 | AN6349 |
| 2081 | CONTIG107 | 355204 | 355553 | 1.34 | 9.24E-02 | transcription_start_site | + | 358694 | 358694 | -3315 | 25056 | AN6349 |
| 2081 | CONTIG107 | 355204 | 355553 | 1.34 | 9.24E-02 | transcription_start_site | + | 359261 | 359261 | -3882 | 25057 | AN6349 |
| 2081 | CONTIG107 | 355204 | 355553 | 1.34 | 9.24E-02 | transcription_start_site | + | 359452 | 359452 | -4073 | 25058 | AN6349 |
| 2081 | CONTIG107 | 355204 | 355553 | 1.34 | 9.24E-02 | transcription_start_site | + | 360125 | 360125 | -4746 | 25059 | AN6349 |
| 2485 | CONTIG107 | 352369 | 353003 | 1.21 | 1.44E-01 | transcription_start_site | + | 355527 | 355527 | -2841 | 25049 | AN6349 |
| 2485 | CONTIG107 | 352369 | 353003 | 1.21 | 1.44E-01 | transcription_start_site | + | 355751 | 355751 | -3065 | 25050 | AN6349 |
| 2485 | CONTIG107 | 352369 | 353003 | 1.21 | 1.44E-01 | transcription_start_site | + | 356508 | 356508 | -3822 | 25051 | AN6349 |
| 2485 | CONTIG107 | 352369 | 353003 | 1.21 | 1.44E-01 | transcription_start_site | + | 356760 | 356760 | -4074 | 25052 | AN6349 |
| 2485 | CONTIG107 | 352369 | 353003 | 1.21 | 1.44E-01 | transcription_start_site | + | 357771 | 357771 | -5085 | 25053 | AN6349 |
| 2362 | CONTIG107 | 362262 | 362531 | 1.25 | 1.25E-01 | transcription_start_site | + | 361327 | 361327 | 1069  | 25060 | AN6350 |
| 135  | CONTIG107 | 364652 | 365166 | 3.09 | 0.00E+00 | transcription_start_site | + | 364584 | 364584 | 325   | 25066 | AN6351 |
| 135  | CONTIG107 | 364652 | 365166 | 3.09 | 0.00E+00 | transcription_start_site | + | 364418 | 364418 | 491   | 25065 | AN6351 |
| 2362 | CONTIG107 | 362262 | 362531 | 1.25 | 1.25E-01 | transcription_start_site | + | 362585 | 362585 | -188  | 25061 | AN6351 |
| 2362 | CONTIG107 | 362262 | 362531 | 1.25 | 1.25E-01 | transcription_start_site | + | 362723 | 362723 | -326  | 25062 | AN6351 |
| 2362 | CONTIG107 | 362262 | 362531 | 1.25 | 1.25E-01 | transcription_start_site | + | 363037 | 363037 | -640  | 25063 | AN6351 |
| 2362 | CONTIG107 | 362262 | 362531 | 1.25 | 1.25E-01 | transcription_start_site | + | 363353 | 363353 | -956  | 25064 | AN6351 |
| 2362 | CONTIG107 | 362262 | 362531 | 1.25 | 1.25E-01 | transcription_start_site | + | 364418 | 364418 | -2021 | 25065 | AN6351 |
| 2362 | CONTIG107 | 362262 | 362531 | 1.25 | 1.25E-01 | transcription_start_site | + | 364584 | 364584 | -2187 | 25066 | AN6351 |
| 135  | CONTIG107 | 364652 | 365166 | 3.09 | 0.00E+00 | transcription_start_site | + | 365784 | 365784 | -875  | 25067 | AN6352 |
| 135  | CONTIG107 | 364652 | 365166 | 3.09 | 0.00E+00 | transcription_start_site | + | 366779 | 366779 | -1870 | 25068 | AN6352 |
| 1945 | CONTIG107 | 367127 | 367567 | 1.39 | 8.01E-02 | transcription_start_site | + | 366779 | 366779 | 568   | 25068 | AN6352 |
| 2362 | CONTIG107 | 362262 | 362531 | 1.25 | 1.25E-01 | transcription_start_site | + | 365784 | 365784 | -3387 | 25067 | AN6352 |
| 2362 | CONTIG107 | 362262 | 362531 | 1.25 | 1.25E-01 | transcription_start_site | + | 366779 | 366779 | -4382 | 25068 | AN6352 |
| 1945 | CONTIG107 | 367127 | 367567 | 1.39 | 8.01E-02 | transcription_start_site | - | 368440 | 368440 | 1093  | 25069 | AN6353 |
| 1946 | CONTIG107 | 373816 | 374235 | 1.39 | 8.01E-02 | transcription_start_site | - | 373728 | 373728 | -297  | 25070 | AN6354 |
| 1946 | CONTIG107 | 373816 | 374235 | 1.39 | 8.01E-02 | transcription_start_site | - | 372213 | 372213 | -1812 | 25071 | AN6354 |
| 1946 | CONTIG107 | 373816 | 374235 | 1.39 | 8.01E-02 | transcription_start_site | - | 370147 | 370147 | -3878 | 25072 | AN6354 |
| 1946 | CONTIG107 | 373816 | 374235 | 1.39 | 8.01E-02 | transcription_start_site | + | 377920 | 377920 | -3894 | 25073 | AN6355 |
| 1946 | CONTIG107 | 373816 | 374235 | 1.39 | 8.01E-02 | transcription_start_site | + | 378977 | 378977 | -4951 | 25074 | AN6355 |
| 1749 | CONTIG107 | 388054 | 388328 | 1.48 | 5.88E-02 | transcription_start_site | - | 384401 | 384401 | -3790 | 25080 | AN6358 |
| 1749 | CONTIG107 | 388054 | 388328 | 1.48 | 5.88E-02 | transcription_start_site | - | 387808 | 387808 | -383  | 25081 | AN6359 |
| 1749 | CONTIG107 | 388054 | 388328 | 1.48 | 5.88E-02 | transcription_start_site | - | 387398 | 387398 | -793  | 25082 | AN6359 |
| 1749 | CONTIG107 | 388054 | 388328 | 1.48 | 5.88E-02 | transcription_start_site | + | 389079 | 389079 | -888  | 25083 | AN6360 |
| 1749 | CONTIG107 | 388054 | 388328 | 1.48 | 5.88E-02 | transcription_start_site | + | 392420 | 392420 | -4229 | 25088 | AN6362 |
| 1749 | CONTIG107 | 388054 | 388328 | 1.48 | 5.88E-02 | transcription_start_site | + | 392786 | 392786 | -4595 | 25089 | AN6362 |
| 623  | CONTIG107 | 414996 | 415330 | 2.28 | 2.22E-03 | transcription_start_site | - | 413017 | 413017 | -2146 | 25116 | AN6370 |

|                |        |        |      |          |                          |   |        |        |       |       |        |
|----------------|--------|--------|------|----------|--------------------------|---|--------|--------|-------|-------|--------|
| 988 CONTIG107  | 411909 | 412193 | 1.92 | 1.11E-02 | transcription_start_site | - | 413017 | 413017 | 966   | 25116 | AN6370 |
| 623 CONTIG107  | 414996 | 415330 | 2.28 | 2.22E-03 | transcription_start_site | + | 417177 | 417177 | -2014 | 25117 | AN6371 |
| 988 CONTIG107  | 411909 | 412193 | 1.92 | 1.11E-02 | transcription_start_site | + | 417177 | 417177 | -5126 | 25117 | AN6371 |
| 1767 CONTIG108 | 14343  | 14602  | 1.47 | 3.70E-02 | transcription_start_site | + | 13847  | 13847  | 625   | 25173 | AN6386 |
| 1767 CONTIG108 | 14343  | 14602  | 1.47 | 3.70E-02 | transcription_start_site | + | 13695  | 13695  | 777   | 25172 | AN6386 |
| 1767 CONTIG108 | 14343  | 14602  | 1.47 | 3.70E-02 | transcription_start_site | + | 14772  | 14772  | -299  | 25174 | AN6387 |
| 1767 CONTIG108 | 14343  | 14602  | 1.47 | 3.70E-02 | transcription_start_site | + | 14925  | 14925  | -452  | 25175 | AN6387 |
| 1767 CONTIG108 | 14343  | 14602  | 1.47 | 3.70E-02 | transcription_start_site | + | 15164  | 15164  | -691  | 25176 | AN6387 |
| 1575 CONTIG108 | 28278  | 28852  | 1.55 | 2.62E-02 | transcription_start_site | - | 28197  | 28197  | -368  | 25192 | AN6391 |
| 1575 CONTIG108 | 28278  | 28852  | 1.55 | 2.62E-02 | transcription_start_site | - | 27980  | 27980  | -585  | 25193 | AN6391 |
| 1575 CONTIG108 | 28278  | 28852  | 1.55 | 2.62E-02 | transcription_start_site | - | 27833  | 27833  | -732  | 25194 | AN6391 |
| 1575 CONTIG108 | 28278  | 28852  | 1.55 | 2.62E-02 | transcription_start_site | - | 27675  | 27675  | -890  | 25195 | AN6391 |
| 1575 CONTIG108 | 28278  | 28852  | 1.55 | 2.62E-02 | transcription_start_site | - | 27097  | 27097  | -1468 | 25196 | AN6391 |
| 1575 CONTIG108 | 28278  | 28852  | 1.55 | 2.62E-02 | transcription_start_site | - | 26976  | 26976  | -1589 | 25197 | AN6391 |
| 2660 CONTIG108 | 29483  | 30142  | 1.14 | 1.25E-01 | transcription_start_site | - | 28197  | 28197  | -1615 | 25192 | AN6391 |
| 2660 CONTIG108 | 29483  | 30142  | 1.14 | 1.25E-01 | transcription_start_site | - | 27980  | 27980  | -1832 | 25193 | AN6391 |
| 2660 CONTIG108 | 29483  | 30142  | 1.14 | 1.25E-01 | transcription_start_site | - | 27833  | 27833  | -1979 | 25194 | AN6391 |
| 2660 CONTIG108 | 29483  | 30142  | 1.14 | 1.25E-01 | transcription_start_site | - | 27675  | 27675  | -2137 | 25195 | AN6391 |
| 2660 CONTIG108 | 29483  | 30142  | 1.14 | 1.25E-01 | transcription_start_site | - | 27097  | 27097  | -2715 | 25196 | AN6391 |
| 2660 CONTIG108 | 29483  | 30142  | 1.14 | 1.25E-01 | transcription_start_site | - | 26976  | 26976  | -2836 | 25197 | AN6391 |
| 1575 CONTIG108 | 28278  | 28852  | 1.55 | 2.62E-02 | transcription_start_site | + | 30753  | 30753  | -2188 | 25198 | AN6392 |
| 1575 CONTIG108 | 28278  | 28852  | 1.55 | 2.62E-02 | transcription_start_site | + | 31263  | 31263  | -2698 | 25199 | AN6392 |
| 1575 CONTIG108 | 28278  | 28852  | 1.55 | 2.62E-02 | transcription_start_site | + | 31530  | 31530  | -2965 | 25200 | AN6392 |
| 1575 CONTIG108 | 28278  | 28852  | 1.55 | 2.62E-02 | transcription_start_site | + | 31708  | 31708  | -3143 | 25201 | AN6392 |
| 1575 CONTIG108 | 28278  | 28852  | 1.55 | 2.62E-02 | transcription_start_site | + | 32384  | 32384  | -3819 | 25202 | AN6392 |
| 2660 CONTIG108 | 29483  | 30142  | 1.14 | 1.25E-01 | transcription_start_site | + | 30753  | 30753  | -940  | 25198 | AN6392 |
| 2660 CONTIG108 | 29483  | 30142  | 1.14 | 1.25E-01 | transcription_start_site | + | 31263  | 31263  | -1450 | 25199 | AN6392 |
| 2660 CONTIG108 | 29483  | 30142  | 1.14 | 1.25E-01 | transcription_start_site | + | 31530  | 31530  | -1717 | 25200 | AN6392 |
| 2660 CONTIG108 | 29483  | 30142  | 1.14 | 1.25E-01 | transcription_start_site | + | 31708  | 31708  | -1895 | 25201 | AN6392 |
| 2660 CONTIG108 | 29483  | 30142  | 1.14 | 1.25E-01 | transcription_start_site | + | 32384  | 32384  | -2571 | 25202 | AN6392 |
| 1575 CONTIG108 | 28278  | 28852  | 1.55 | 2.62E-02 | transcription_start_site | + | 32723  | 32723  | -4158 | 25203 | AN6393 |
| 1575 CONTIG108 | 28278  | 28852  | 1.55 | 2.62E-02 | transcription_start_site | + | 32931  | 32931  | -4366 | 25204 | AN6393 |
| 1575 CONTIG108 | 28278  | 28852  | 1.55 | 2.62E-02 | transcription_start_site | + | 33402  | 33402  | -4837 | 25205 | AN6393 |
| 2660 CONTIG108 | 29483  | 30142  | 1.14 | 1.25E-01 | transcription_start_site | + | 32723  | 32723  | -2910 | 25203 | AN6393 |
| 2660 CONTIG108 | 29483  | 30142  | 1.14 | 1.25E-01 | transcription_start_site | + | 32931  | 32931  | -3118 | 25204 | AN6393 |
| 2660 CONTIG108 | 29483  | 30142  | 1.14 | 1.25E-01 | transcription_start_site | + | 33402  | 33402  | -3589 | 25205 | AN6393 |
| 2660 CONTIG108 | 29483  | 30142  | 1.14 | 1.25E-01 | transcription_start_site | + | 34077  | 34077  | -4264 | 25206 | AN6394 |
| 2660 CONTIG108 | 29483  | 30142  | 1.14 | 1.25E-01 | transcription_start_site | + | 34756  | 34756  | -4943 | 25207 | AN6394 |
| 2660 CONTIG108 | 29483  | 30142  | 1.14 | 1.25E-01 | transcription_start_site | + | 35046  | 35046  | -5233 | 25208 | AN6394 |
| 1852 CONTIG108 | 45017  | 45431  | 1.43 | 2.64E-02 | transcription_start_site | - | 41345  | 41345  | -3879 | 25213 | AN6396 |
| 1852 CONTIG108 | 45017  | 45431  | 1.43 | 2.64E-02 | transcription_start_site | - | 41163  | 41163  | -4061 | 25214 | AN6396 |
| 1852 CONTIG108 | 45017  | 45431  | 1.43 | 2.64E-02 | transcription_start_site | - | 41027  | 41027  | -4197 | 25215 | AN6396 |
| 1852 CONTIG108 | 45017  | 45431  | 1.43 | 2.64E-02 | transcription_start_site | + | 44621  | 44621  | 603   | 25220 | AN6397 |
| 1852 CONTIG108 | 45017  | 45431  | 1.43 | 2.64E-02 | transcription_start_site | + | 45106  | 45106  | 118   | 25221 | AN6398 |
| 1852 CONTIG108 | 45017  | 45431  | 1.43 | 2.64E-02 | transcription_start_site | + | 47270  | 47270  | -2046 | 25222 | AN6399 |
| 1852 CONTIG108 | 45017  | 45431  | 1.43 | 2.64E-02 | transcription_start_site | + | 47581  | 47581  | -2357 | 25223 | AN6399 |
| 1852 CONTIG108 | 45017  | 45431  | 1.43 | 2.64E-02 | transcription_start_site | + | 48497  | 48497  | -3273 | 25224 | AN6399 |
| 1852 CONTIG108 | 45017  | 45431  | 1.43 | 2.64E-02 | transcription_start_site | + | 50219  | 50219  | -4995 | 25225 | AN6400 |
| 497 CONTIG108  | 58817  | 59154  | 2.45 | 2.16E-04 | transcription_start_site | - | 58669  | 58669  | -316  | 25236 | AN6402 |
| 497 CONTIG108  | 58817  | 59154  | 2.45 | 2.16E-04 | transcription_start_site | - | 58321  | 58321  | -664  | 25237 | AN6402 |
| 497 CONTIG108  | 58817  | 59154  | 2.45 | 2.16E-04 | transcription_start_site | - | 57282  | 57282  | -1703 | 25238 | AN6402 |
| 1040 CONTIG108 | 57077  | 57441  | 1.88 | 6.61E-03 | transcription_start_site | - | 57282  | 57282  | 23    | 25238 | AN6402 |
| 1040 CONTIG108 | 57077  | 57441  | 1.88 | 6.61E-03 | transcription_start_site | - | 58321  | 58321  | 1062  | 25237 | AN6402 |
| 497 CONTIG108  | 58817  | 59154  | 2.45 | 2.16E-04 | transcription_start_site | + | 59388  | 59388  | -402  | 25239 | AN6403 |
| 497 CONTIG108  | 58817  | 59154  | 2.45 | 2.16E-04 | transcription_start_site | + | 59788  | 59788  | -802  | 25240 | AN6403 |
| 497 CONTIG108  | 58817  | 59154  | 2.45 | 2.16E-04 | transcription_start_site | + | 59875  | 59875  | -889  | 25241 | AN6403 |
| 497 CONTIG108  | 58817  | 59154  | 2.45 | 2.16E-04 | transcription_start_site | + | 60398  | 60398  | -1412 | 25242 | AN6403 |

|      |           |        |        |      |          |                          |   |        |        |       |       |        |
|------|-----------|--------|--------|------|----------|--------------------------|---|--------|--------|-------|-------|--------|
| 1040 | CONTIG108 | 57077  | 57441  | 1.88 | 6.61E-03 | transcription_start_site | + | 59388  | 59388  | -2129 | 25239 | AN6403 |
| 1040 | CONTIG108 | 57077  | 57441  | 1.88 | 6.61E-03 | transcription_start_site | + | 59788  | 59788  | -2529 | 25240 | AN6403 |
| 1040 | CONTIG108 | 57077  | 57441  | 1.88 | 6.61E-03 | transcription_start_site | + | 59875  | 59875  | -2616 | 25241 | AN6403 |
| 1040 | CONTIG108 | 57077  | 57441  | 1.88 | 6.61E-03 | transcription_start_site | + | 60398  | 60398  | -3139 | 25242 | AN6403 |
| 497  | CONTIG108 | 58817  | 59154  | 2.45 | 2.16E-04 | transcription_start_site | + | 63451  | 63451  | -4465 | 25243 | AN6404 |
| 1855 | CONTIG108 | 66095  | 66664  | 1.43 | 4.36E-02 | transcription_start_site | - | 66353  | 66353  | -26   | 25244 | AN6405 |
| 1855 | CONTIG108 | 66095  | 66664  | 1.43 | 4.36E-02 | transcription_start_site | - | 66115  | 66115  | -264  | 25245 | AN6405 |
| 1855 | CONTIG108 | 66095  | 66664  | 1.43 | 4.36E-02 | transcription_start_site | - | 65505  | 65505  | -874  | 25246 | AN6405 |
| 1855 | CONTIG108 | 66095  | 66664  | 1.43 | 4.36E-02 | transcription_start_site | - | 65450  | 65450  | -929  | 25247 | AN6405 |
| 1855 | CONTIG108 | 66095  | 66664  | 1.43 | 4.36E-02 | transcription_start_site | + | 66621  | 66621  | -241  | 25248 | AN6406 |
| 1855 | CONTIG108 | 66095  | 66664  | 1.43 | 4.36E-02 | transcription_start_site | + | 67013  | 67013  | -633  | 25249 | AN6406 |
| 1855 | CONTIG108 | 66095  | 66664  | 1.43 | 4.36E-02 | transcription_start_site | + | 71154  | 71154  | -4774 | 25250 | AN6407 |
| 1855 | CONTIG108 | 66095  | 66664  | 1.43 | 4.36E-02 | transcription_start_site | + | 71252  | 71252  | -4872 | 25251 | AN6407 |
| 2814 | CONTIG108 | 78453  | 79332  | 1.06 | 1.50E-01 | transcription_start_site | - | 75642  | 75642  | -3250 | 25257 | AN6409 |
| 2814 | CONTIG108 | 78453  | 79332  | 1.06 | 1.50E-01 | transcription_start_site | - | 75059  | 75059  | -3833 | 25258 | AN6409 |
| 2814 | CONTIG108 | 78453  | 79332  | 1.06 | 1.50E-01 | transcription_start_site | - | 74895  | 74895  | -3997 | 25259 | AN6409 |
| 2814 | CONTIG108 | 78453  | 79332  | 1.06 | 1.50E-01 | transcription_start_site | + | 79324  | 79324  | -431  | 25265 | AN6410 |
| 2814 | CONTIG108 | 78453  | 79332  | 1.06 | 1.50E-01 | transcription_start_site | + | 77548  | 77548  | 1344  | 25264 | AN6410 |
| 2814 | CONTIG108 | 78453  | 79332  | 1.06 | 1.50E-01 | transcription_start_site | + | 82150  | 82150  | -3257 | 25266 | AN6411 |
| 2814 | CONTIG108 | 78453  | 79332  | 1.06 | 1.50E-01 | transcription_start_site | + | 82217  | 82217  | -3324 | 25267 | AN6411 |
| 2814 | CONTIG108 | 78453  | 79332  | 1.06 | 1.50E-01 | transcription_start_site | + | 84077  | 84077  | -5184 | 25268 | AN6412 |
| 314  | CONTIG108 | 86868  | 87127  | 2.74 | 0.00E+00 | transcription_start_site | + | 87618  | 87618  | -620  | 25271 | AN6413 |
| 314  | CONTIG108 | 86868  | 87127  | 2.74 | 0.00E+00 | transcription_start_site | + | 87842  | 87842  | -844  | 25272 | AN6413 |
| 314  | CONTIG108 | 86868  | 87127  | 2.74 | 0.00E+00 | transcription_start_site | + | 88415  | 88415  | -1417 | 25273 | AN6413 |
| 314  | CONTIG108 | 86868  | 87127  | 2.74 | 0.00E+00 | transcription_start_site | + | 90294  | 90294  | -3296 | 25274 | AN6414 |
| 314  | CONTIG108 | 86868  | 87127  | 2.74 | 0.00E+00 | transcription_start_site | + | 90425  | 90425  | -3427 | 25275 | AN6414 |
| 314  | CONTIG108 | 86868  | 87127  | 2.74 | 0.00E+00 | transcription_start_site | + | 90557  | 90557  | -3559 | 25276 | AN6414 |
| 314  | CONTIG108 | 86868  | 87127  | 2.74 | 0.00E+00 | transcription_start_site | + | 91280  | 91280  | -4282 | 25277 | AN6414 |
| 772  | CONTIG108 | 123841 | 124100 | 2.12 | 1.80E-03 | transcription_start_site | - | 123766 | 123766 | -204  | 25319 | AN6426 |
| 772  | CONTIG108 | 123841 | 124100 | 2.12 | 1.80E-03 | transcription_start_site | - | 123232 | 123232 | -738  | 25320 | AN6426 |
| 2280 | CONTIG108 | 122946 | 123298 | 1.27 | 6.16E-02 | transcription_start_site | - | 123232 | 123232 | 110   | 25320 | AN6426 |
| 2280 | CONTIG108 | 122946 | 123298 | 1.27 | 6.16E-02 | transcription_start_site | - | 123766 | 123766 | 644   | 25319 | AN6426 |
| 772  | CONTIG108 | 123841 | 124100 | 2.12 | 1.80E-03 | transcription_start_site | + | 129050 | 129050 | -5079 | 25326 | AN6428 |
| 2745 | CONTIG108 | 151595 | 151939 | 1.1  | 1.44E-01 | transcription_start_site | - | 151912 | 151912 | 145   | 25352 | AN6433 |
| 2745 | CONTIG108 | 151595 | 151939 | 1.1  | 1.44E-01 | transcription_start_site | - | 151195 | 151195 | -572  | 25353 | AN6433 |
| 2745 | CONTIG108 | 151595 | 151939 | 1.1  | 1.44E-01 | transcription_start_site | - | 152525 | 152525 | 758   | 25351 | AN6433 |
| 2745 | CONTIG108 | 151595 | 151939 | 1.1  | 1.44E-01 | transcription_start_site | - | 150743 | 150743 | -1024 | 25354 | AN6433 |
| 2745 | CONTIG108 | 151595 | 151939 | 1.1  | 1.44E-01 | transcription_start_site | + | 153331 | 153331 | -1564 | 25355 | AN6434 |
| 2745 | CONTIG108 | 151595 | 151939 | 1.1  | 1.44E-01 | transcription_start_site | + | 153551 | 153551 | -1784 | 25356 | AN6434 |
| 2745 | CONTIG108 | 151595 | 151939 | 1.1  | 1.44E-01 | transcription_start_site | + | 153604 | 153604 | -1837 | 25357 | AN6434 |
| 2745 | CONTIG108 | 151595 | 151939 | 1.1  | 1.44E-01 | transcription_start_site | + | 153789 | 153789 | -2022 | 25358 | AN6434 |
| 2745 | CONTIG108 | 151595 | 151939 | 1.1  | 1.44E-01 | transcription_start_site | + | 154410 | 154410 | -2643 | 25359 | AN6434 |
| 2745 | CONTIG108 | 151595 | 151939 | 1.1  | 1.44E-01 | transcription_start_site | + | 154811 | 154811 | -3044 | 25360 | AN6434 |
| 2745 | CONTIG108 | 151595 | 151939 | 1.1  | 1.44E-01 | transcription_start_site | + | 155065 | 155065 | -3298 | 25361 | AN6434 |
| 2745 | CONTIG108 | 151595 | 151939 | 1.1  | 1.44E-01 | transcription_start_site | + | 156254 | 156254 | -4487 | 25362 | AN6435 |
| 2745 | CONTIG108 | 151595 | 151939 | 1.1  | 1.44E-01 | transcription_start_site | + | 156714 | 156714 | -4947 | 25363 | AN6435 |
| 2658 | CONTIG108 | 162383 | 163782 | 1.14 | 1.07E-01 | transcription_start_site | + | 163523 | 163523 | -440  | 25365 | AN6436 |
| 2658 | CONTIG108 | 162383 | 163782 | 1.14 | 1.07E-01 | transcription_start_site | + | 164428 | 164428 | -1345 | 25366 | AN6436 |
| 2874 | CONTIG108 | 164268 | 165353 | 1.02 | 1.79E-01 | transcription_start_site | + | 164428 | 164428 | 382   | 25366 | AN6436 |
| 2874 | CONTIG108 | 164268 | 165353 | 1.02 | 1.79E-01 | transcription_start_site | + | 163523 | 163523 | 1287  | 25365 | AN6436 |
| 558  | CONTIG108 | 165533 | 165967 | 2.37 | 5.64E-04 | transcription_start_site | + | 166474 | 166474 | -724  | 25367 | AN6437 |
| 558  | CONTIG108 | 165533 | 165967 | 2.37 | 5.64E-04 | transcription_start_site | + | 166651 | 166651 | -901  | 25368 | AN6437 |
| 640  | CONTIG108 | 166738 | 167077 | 2.25 | 1.01E-03 | transcription_start_site | + | 166651 | 166651 | 256   | 25368 | AN6437 |
| 640  | CONTIG108 | 166738 | 167077 | 2.25 | 1.01E-03 | transcription_start_site | + | 166474 | 166474 | 433   | 25367 | AN6437 |
| 2658 | CONTIG108 | 162383 | 163782 | 1.14 | 1.07E-01 | transcription_start_site | + | 166474 | 166474 | -3391 | 25367 | AN6437 |
| 2658 | CONTIG108 | 162383 | 163782 | 1.14 | 1.07E-01 | transcription_start_site | + | 166651 | 166651 | -3568 | 25368 | AN6437 |
| 2874 | CONTIG108 | 164268 | 165353 | 1.02 | 1.79E-01 | transcription_start_site | + | 166474 | 166474 | -1663 | 25367 | AN6437 |

|      |           |        |        |      |          |                          |   |        |        |       |       |        |
|------|-----------|--------|--------|------|----------|--------------------------|---|--------|--------|-------|-------|--------|
| 2874 | CONTIG108 | 164268 | 165353 | 1.02 | 1.79E-01 | transcription_start_site | + | 166651 | 166651 | -1840 | 25368 | AN6437 |
| 2158 | CONTIG108 | 180685 | 181109 | 1.31 | 4.42E-02 | transcription_start_site | - | 176596 | 176596 | -4301 | 25369 | AN6438 |
| 2158 | CONTIG108 | 180685 | 181109 | 1.31 | 4.42E-02 | transcription_start_site | - | 176531 | 176531 | -4366 | 25370 | AN6438 |
| 585  | CONTIG108 | 182720 | 183054 | 2.33 | 8.69E-04 | transcription_start_site | - | 178283 | 178283 | -4604 | 25371 | AN6439 |
| 585  | CONTIG108 | 182720 | 183054 | 2.33 | 8.69E-04 | transcription_start_site | - | 178062 | 178062 | -4825 | 25372 | AN6439 |
| 2158 | CONTIG108 | 180685 | 181109 | 1.31 | 4.42E-02 | transcription_start_site | - | 178283 | 178283 | -2614 | 25371 | AN6439 |
| 2158 | CONTIG108 | 180685 | 181109 | 1.31 | 4.42E-02 | transcription_start_site | - | 178062 | 178062 | -2835 | 25372 | AN6439 |
| 585  | CONTIG108 | 182720 | 183054 | 2.33 | 8.69E-04 | transcription_start_site | - | 180220 | 180220 | -2667 | 25373 | AN6440 |
| 585  | CONTIG108 | 182720 | 183054 | 2.33 | 8.69E-04 | transcription_start_site | - | 179927 | 179927 | -2960 | 25374 | AN6440 |
| 2158 | CONTIG108 | 180685 | 181109 | 1.31 | 4.42E-02 | transcription_start_site | - | 180220 | 180220 | -677  | 25373 | AN6440 |
| 2158 | CONTIG108 | 180685 | 181109 | 1.31 | 4.42E-02 | transcription_start_site | - | 179927 | 179927 | -970  | 25374 | AN6440 |
| 585  | CONTIG108 | 182720 | 183054 | 2.33 | 8.69E-04 | transcription_start_site | + | 181874 | 181874 | 1013  | 25377 | AN6441 |
| 2158 | CONTIG108 | 180685 | 181109 | 1.31 | 4.42E-02 | transcription_start_site | + | 181181 | 181181 | -284  | 25375 | AN6441 |
| 2158 | CONTIG108 | 180685 | 181109 | 1.31 | 4.42E-02 | transcription_start_site | + | 181412 | 181412 | -515  | 25376 | AN6441 |
| 2158 | CONTIG108 | 180685 | 181109 | 1.31 | 4.42E-02 | transcription_start_site | + | 181874 | 181874 | -977  | 25377 | AN6441 |
| 101  | CONTIG108 | 187061 | 187570 | 3.22 | 0.00E+00 | transcription_start_site | + | 187131 | 187131 | 184   | 25382 | AN6442 |
| 101  | CONTIG108 | 187061 | 187570 | 3.22 | 0.00E+00 | transcription_start_site | + | 187551 | 187551 | -235  | 25383 | AN6442 |
| 101  | CONTIG108 | 187061 | 187570 | 3.22 | 0.00E+00 | transcription_start_site | + | 186626 | 186626 | 689   | 25381 | AN6442 |
| 101  | CONTIG108 | 187061 | 187570 | 3.22 | 0.00E+00 | transcription_start_site | + | 186330 | 186330 | 985   | 25380 | AN6442 |
| 101  | CONTIG108 | 187061 | 187570 | 3.22 | 0.00E+00 | transcription_start_site | + | 189047 | 189047 | -1731 | 25384 | AN6442 |
| 585  | CONTIG108 | 182720 | 183054 | 2.33 | 8.69E-04 | transcription_start_site | + | 185622 | 185622 | -2735 | 25378 | AN6442 |
| 585  | CONTIG108 | 182720 | 183054 | 2.33 | 8.69E-04 | transcription_start_site | + | 185823 | 185823 | -2936 | 25379 | AN6442 |
| 585  | CONTIG108 | 182720 | 183054 | 2.33 | 8.69E-04 | transcription_start_site | + | 186330 | 186330 | -3443 | 25380 | AN6442 |
| 585  | CONTIG108 | 182720 | 183054 | 2.33 | 8.69E-04 | transcription_start_site | + | 186626 | 186626 | -3739 | 25381 | AN6442 |
| 585  | CONTIG108 | 182720 | 183054 | 2.33 | 8.69E-04 | transcription_start_site | + | 187131 | 187131 | -4244 | 25382 | AN6442 |
| 585  | CONTIG108 | 182720 | 183054 | 2.33 | 8.69E-04 | transcription_start_site | + | 187551 | 187551 | -4664 | 25383 | AN6442 |
| 2158 | CONTIG108 | 180685 | 181109 | 1.31 | 4.42E-02 | transcription_start_site | + | 185622 | 185622 | -4725 | 25378 | AN6442 |
| 2158 | CONTIG108 | 180685 | 181109 | 1.31 | 4.42E-02 | transcription_start_site | + | 185823 | 185823 | -4926 | 25379 | AN6442 |
| 1768 | CONTIG108 | 193146 | 193566 | 1.47 | 3.70E-02 | transcription_start_site | - | 193266 | 193266 | -90   | 25386 | AN6443 |
| 1768 | CONTIG108 | 193146 | 193566 | 1.47 | 3.70E-02 | transcription_start_site | - | 193571 | 193571 | 215   | 25385 | AN6443 |
| 1768 | CONTIG108 | 193146 | 193566 | 1.47 | 3.70E-02 | transcription_start_site | + | 198190 | 198190 | -4834 | 25389 | AN6445 |
| 1768 | CONTIG108 | 193146 | 193566 | 1.47 | 3.70E-02 | transcription_start_site | + | 198454 | 198454 | -5098 | 25390 | AN6445 |
| 1856 | CONTIG108 | 248420 | 248844 | 1.43 | 4.36E-02 | transcription_start_site | + | 248744 | 248744 | -112  | 25459 | AN6460 |
| 1856 | CONTIG108 | 248420 | 248844 | 1.43 | 4.36E-02 | transcription_start_site | + | 248459 | 248459 | 173   | 25458 | AN6460 |
| 1856 | CONTIG108 | 248420 | 248844 | 1.43 | 4.36E-02 | transcription_start_site | + | 253301 | 253301 | -4669 | 25465 | AN6462 |
| 1856 | CONTIG108 | 248420 | 248844 | 1.43 | 4.36E-02 | transcription_start_site | + | 253458 | 253458 | -4826 | 25466 | AN6462 |
| 743  | CONTIG108 | 306167 | 306577 | 2.16 | 1.54E-03 | transcription_start_site | - | 305631 | 305631 | -741  | 25505 | AN6472 |
| 743  | CONTIG108 | 306167 | 306577 | 2.16 | 1.54E-03 | transcription_start_site | - | 305019 | 305019 | -1353 | 25506 | AN6472 |
| 2744 | CONTIG108 | 336532 | 336966 | 1.1  | 1.28E-01 | transcription_start_site | + | 336046 | 336046 | 703   | 25553 | AN6481 |
| 2744 | CONTIG108 | 336532 | 336966 | 1.1  | 1.28E-01 | transcription_start_site | + | 335809 | 335809 | 940   | 25552 | AN6481 |
| 2744 | CONTIG108 | 336532 | 336966 | 1.1  | 1.28E-01 | transcription_start_site | - | 337258 | 337258 | 509   | 25555 | AN6482 |
| 2744 | CONTIG108 | 336532 | 336966 | 1.1  | 1.28E-01 | transcription_start_site | - | 337566 | 337566 | 817   | 25554 | AN6482 |
| 564  | CONTIG109 | 9691   | 10123  | 2.36 | 1.54E-03 | transcription_start_site | - | 9140   | 9140   | -767  | 25572 | AN6487 |
| 564  | CONTIG109 | 9691   | 10123  | 2.36 | 1.54E-03 | transcription_start_site | - | 9067   | 9067   | -840  | 25573 | AN6487 |
| 564  | CONTIG109 | 9691   | 10123  | 2.36 | 1.54E-03 | transcription_start_site | - | 8941   | 8941   | -966  | 25574 | AN6487 |
| 564  | CONTIG109 | 9691   | 10123  | 2.36 | 1.54E-03 | transcription_start_site | - | 8567   | 8567   | -1340 | 25575 | AN6487 |
| 564  | CONTIG109 | 9691   | 10123  | 2.36 | 1.54E-03 | transcription_start_site | - | 10694  | 10694  | 787   | 25580 | AN6488 |
| 564  | CONTIG109 | 9691   | 10123  | 2.36 | 1.54E-03 | transcription_start_site | - | 10862  | 10862  | 955   | 25579 | AN6488 |
| 564  | CONTIG109 | 9691   | 10123  | 2.36 | 1.54E-03 | transcription_start_site | - | 11027  | 11027  | 1120  | 25578 | AN6488 |
| 564  | CONTIG109 | 9691   | 10123  | 2.36 | 1.54E-03 | transcription_start_site | + | 13316  | 13316  | -3409 | 25586 | AN6490 |
| 564  | CONTIG109 | 9691   | 10123  | 2.36 | 1.54E-03 | transcription_start_site | + | 13586  | 13586  | -3679 | 25587 | AN6490 |
| 564  | CONTIG109 | 9691   | 10123  | 2.36 | 1.54E-03 | transcription_start_site | + | 13726  | 13726  | -3819 | 25588 | AN6490 |
| 564  | CONTIG109 | 9691   | 10123  | 2.36 | 1.54E-03 | transcription_start_site | + | 13863  | 13863  | -3956 | 25589 | AN6490 |
| 564  | CONTIG109 | 9691   | 10123  | 2.36 | 1.54E-03 | transcription_start_site | + | 13981  | 13981  | -4074 | 25590 | AN6490 |
| 564  | CONTIG109 | 9691   | 10123  | 2.36 | 1.54E-03 | transcription_start_site | + | 14239  | 14239  | -4332 | 25591 | AN6490 |
| 564  | CONTIG109 | 9691   | 10123  | 2.36 | 1.54E-03 | transcription_start_site | + | 14571  | 14571  | -4664 | 25592 | AN6490 |
| 760  | CONTIG109 | 35778  | 36133  | 2.14 | 4.61E-03 | transcription_start_site | - | 35143  | 35143  | -812  | 25633 | AN6499 |



|      |           |        |        |      |          |                          |   |        |        |       |       |        |
|------|-----------|--------|--------|------|----------|--------------------------|---|--------|--------|-------|-------|--------|
| 760  | CONTIG109 | 35778  | 36133  | 2.14 | 4.61E-03 | transcription_start_site | - | 35065  | 35065  | -890  | 25634 | AN6499 |
| 760  | CONTIG109 | 35778  | 36133  | 2.14 | 4.61E-03 | transcription_start_site | - | 34970  | 34970  | -985  | 25635 | AN6499 |
| 760  | CONTIG109 | 35778  | 36133  | 2.14 | 4.61E-03 | transcription_start_site | - | 34807  | 34807  | -1148 | 25636 | AN6499 |
| 760  | CONTIG109 | 35778  | 36133  | 2.14 | 4.61E-03 | transcription_start_site | - | 34649  | 34649  | -1306 | 25637 | AN6499 |
| 760  | CONTIG109 | 35778  | 36133  | 2.14 | 4.61E-03 | transcription_start_site | - | 34213  | 34213  | -1742 | 25638 | AN6499 |
| 760  | CONTIG109 | 35778  | 36133  | 2.14 | 4.61E-03 | transcription_start_site | - | 34074  | 34074  | -1881 | 25639 | AN6499 |
| 760  | CONTIG109 | 35778  | 36133  | 2.14 | 4.61E-03 | transcription_start_site | - | 33872  | 33872  | -2083 | 25640 | AN6499 |
| 760  | CONTIG109 | 35778  | 36133  | 2.14 | 4.61E-03 | transcription_start_site | - | 36486  | 36486  | 530   | 25645 | AN6500 |
| 760  | CONTIG109 | 35778  | 36133  | 2.14 | 4.61E-03 | transcription_start_site | - | 36685  | 36685  | 729   | 25644 | AN6500 |
| 760  | CONTIG109 | 35778  | 36133  | 2.14 | 4.61E-03 | transcription_start_site | - | 36774  | 36774  | 818   | 25643 | AN6500 |
| 760  | CONTIG109 | 35778  | 36133  | 2.14 | 4.61E-03 | transcription_start_site | - | 36941  | 36941  | 985   | 25642 | AN6500 |
| 760  | CONTIG109 | 35778  | 36133  | 2.14 | 4.61E-03 | transcription_start_site | - | 37086  | 37086  | 1130  | 25641 | AN6500 |
| 1673 | CONTIG109 | 46726  | 47155  | 1.51 | 5.22E-02 | transcription_start_site | - | 43921  | 43921  | -3019 | 25649 | AN6503 |
| 1673 | CONTIG109 | 46726  | 47155  | 1.51 | 5.22E-02 | transcription_start_site | - | 43062  | 43062  | -3878 | 25650 | AN6503 |
| 1673 | CONTIG109 | 46726  | 47155  | 1.51 | 5.22E-02 | transcription_start_site | - | 42945  | 42945  | -3995 | 25651 | AN6503 |
| 1673 | CONTIG109 | 46726  | 47155  | 1.51 | 5.22E-02 | transcription_start_site | - | 42709  | 42709  | -4231 | 25652 | AN6503 |
| 1673 | CONTIG109 | 46726  | 47155  | 1.51 | 5.22E-02 | transcription_start_site | + | 47928  | 47928  | -987  | 25653 | AN6504 |
| 1673 | CONTIG109 | 46726  | 47155  | 1.51 | 5.22E-02 | transcription_start_site | + | 48293  | 48293  | -1352 | 25654 | AN6504 |
| 1673 | CONTIG109 | 46726  | 47155  | 1.51 | 5.22E-02 | transcription_start_site | + | 48637  | 48637  | -1696 | 25655 | AN6504 |
| 1673 | CONTIG109 | 46726  | 47155  | 1.51 | 5.22E-02 | transcription_start_site | + | 48878  | 48878  | -1937 | 25656 | AN6504 |
| 1673 | CONTIG109 | 46726  | 47155  | 1.51 | 5.22E-02 | transcription_start_site | + | 49057  | 49057  | -2116 | 25657 | AN6504 |
| 2363 | CONTIG109 | 51470  | 51739  | 1.25 | 1.25E-01 | transcription_start_site | - | 51565  | 51565  | -39   | 25661 | AN6505 |
| 2363 | CONTIG109 | 51470  | 51739  | 1.25 | 1.25E-01 | transcription_start_site | - | 51474  | 51474  | -130  | 25662 | AN6505 |
| 2363 | CONTIG109 | 51470  | 51739  | 1.25 | 1.25E-01 | transcription_start_site | - | 51864  | 51864  | 259   | 25660 | AN6505 |
| 2363 | CONTIG109 | 51470  | 51739  | 1.25 | 1.25E-01 | transcription_start_site | - | 52007  | 52007  | 402   | 25659 | AN6505 |
| 2363 | CONTIG109 | 51470  | 51739  | 1.25 | 1.25E-01 | transcription_start_site | - | 50888  | 50888  | -716  | 25663 | AN6505 |
| 2363 | CONTIG109 | 51470  | 51739  | 1.25 | 1.25E-01 | transcription_start_site | - | 52331  | 52331  | 726   | 25658 | AN6505 |
| 2363 | CONTIG109 | 51470  | 51739  | 1.25 | 1.25E-01 | transcription_start_site | - | 50368  | 50368  | -1236 | 25664 | AN6505 |
| 2363 | CONTIG109 | 51470  | 51739  | 1.25 | 1.25E-01 | transcription_start_site | - | 50176  | 50176  | -1428 | 25665 | AN6505 |
| 2363 | CONTIG109 | 51470  | 51739  | 1.25 | 1.25E-01 | transcription_start_site | - | 50029  | 50029  | -1575 | 25666 | AN6505 |
| 2363 | CONTIG109 | 51470  | 51739  | 1.25 | 1.25E-01 | transcription_start_site | + | 52850  | 52850  | -1245 | 25667 | AN6506 |
| 2363 | CONTIG109 | 51470  | 51739  | 1.25 | 1.25E-01 | transcription_start_site | + | 53186  | 53186  | -1581 | 25668 | AN6506 |
| 19   | CONTIG109 | 62479  | 62828  | 3.61 | 0.00E+00 | transcription_start_site | - | 57518  | 57518  | -5135 | 25669 | AN6507 |
| 19   | CONTIG109 | 62479  | 62828  | 3.61 | 0.00E+00 | transcription_start_site | - | 60280  | 60280  | -2373 | 25676 | AN6508 |
| 19   | CONTIG109 | 62479  | 62828  | 3.61 | 0.00E+00 | transcription_start_site | - | 60146  | 60146  | -2507 | 25677 | AN6508 |
| 19   | CONTIG109 | 62479  | 62828  | 3.61 | 0.00E+00 | transcription_start_site | - | 59908  | 59908  | -2745 | 25678 | AN6508 |
| 19   | CONTIG109 | 62479  | 62828  | 3.61 | 0.00E+00 | transcription_start_site | - | 59759  | 59759  | -2894 | 25679 | AN6508 |
| 19   | CONTIG109 | 62479  | 62828  | 3.61 | 0.00E+00 | transcription_start_site | - | 59360  | 59360  | -3293 | 25680 | AN6508 |
| 19   | CONTIG109 | 62479  | 62828  | 3.61 | 0.00E+00 | transcription_start_site | - | 59106  | 59106  | -3547 | 25681 | AN6508 |
| 19   | CONTIG109 | 62479  | 62828  | 3.61 | 0.00E+00 | transcription_start_site | - | 58827  | 58827  | -3826 | 25682 | AN6508 |
| 329  | CONTIG109 | 66314  | 66593  | 2.72 | 2.39E-04 | transcription_start_site | - | 66294  | 66294  | -159  | 25686 | AN6509 |
| 329  | CONTIG109 | 66314  | 66593  | 2.72 | 2.39E-04 | transcription_start_site | - | 66724  | 66724  | 270   | 25685 | AN6509 |
| 329  | CONTIG109 | 66314  | 66593  | 2.72 | 2.39E-04 | transcription_start_site | - | 66964  | 66964  | 510   | 25684 | AN6509 |
| 329  | CONTIG109 | 66314  | 66593  | 2.72 | 2.39E-04 | transcription_start_site | - | 67105  | 67105  | 651   | 25683 | AN6509 |
| 1674 | CONTIG109 | 107710 | 108209 | 1.51 | 5.22E-02 | transcription_start_site | - | 104488 | 104488 | -3471 | 25724 | AN6523 |
| 1674 | CONTIG109 | 107710 | 108209 | 1.51 | 5.22E-02 | transcription_start_site | - | 107405 | 107405 | -554  | 25729 | AN6525 |
| 1674 | CONTIG109 | 107710 | 108209 | 1.51 | 5.22E-02 | transcription_start_site | - | 107249 | 107249 | -710  | 25730 | AN6525 |
| 1674 | CONTIG109 | 107710 | 108209 | 1.51 | 5.22E-02 | transcription_start_site | - | 107168 | 107168 | -791  | 25731 | AN6525 |
| 1674 | CONTIG109 | 107710 | 108209 | 1.51 | 5.22E-02 | transcription_start_site | - | 106933 | 106933 | -1026 | 25732 | AN6525 |
| 1674 | CONTIG109 | 107710 | 108209 | 1.51 | 5.22E-02 | transcription_start_site | - | 106337 | 106337 | -1622 | 25733 | AN6525 |
| 717  | CONTIG109 | 118280 | 118569 | 2.18 | 3.61E-03 | transcription_start_site | - | 115368 | 115368 | -3056 | 25737 | AN6528 |
| 717  | CONTIG109 | 118280 | 118569 | 2.18 | 3.61E-03 | transcription_start_site | - | 115242 | 115242 | -3182 | 25738 | AN6528 |
| 717  | CONTIG109 | 118280 | 118569 | 2.18 | 3.61E-03 | transcription_start_site | - | 115021 | 115021 | -3403 | 25739 | AN6528 |
| 717  | CONTIG109 | 118280 | 118569 | 2.18 | 3.61E-03 | transcription_start_site | - | 114589 | 114589 | -3835 | 25740 | AN6528 |
| 717  | CONTIG109 | 118280 | 118569 | 2.18 | 3.61E-03 | transcription_start_site | + | 117710 | 117710 | 714   | 25741 | AN6529 |
| 717  | CONTIG109 | 118280 | 118569 | 2.18 | 3.61E-03 | transcription_start_site | + | 119636 | 119636 | -1211 | 25742 | AN6529 |
| 717  | CONTIG109 | 118280 | 118569 | 2.18 | 3.61E-03 | transcription_start_site | + | 119899 | 119899 | -1474 | 25743 | AN6529 |

|      |           |        |        |      |          |                          |   |        |        |       |       |        |
|------|-----------|--------|--------|------|----------|--------------------------|---|--------|--------|-------|-------|--------|
| 717  | CONTIG109 | 118280 | 118569 | 2.18 | 3.61E-03 | transcription_start_site | + | 123145 | 123145 | -4720 | 25746 | AN6531 |
| 717  | CONTIG109 | 118280 | 118569 | 2.18 | 3.61E-03 | transcription_start_site | + | 123332 | 123332 | -4907 | 25747 | AN6531 |
| 40   | CONTIG109 | 135836 | 136110 | 3.48 | 0.00E+00 | transcription_start_site | - | 131772 | 131772 | -4201 | 25751 | AN6533 |
| 40   | CONTIG109 | 135836 | 136110 | 3.48 | 0.00E+00 | transcription_start_site | - | 131509 | 131509 | -4464 | 25752 | AN6533 |
| 157  | CONTIG109 | 134046 | 134315 | 3.03 | 0.00E+00 | transcription_start_site | - | 131772 | 131772 | -2408 | 25751 | AN6533 |
| 157  | CONTIG109 | 134046 | 134315 | 3.03 | 0.00E+00 | transcription_start_site | - | 131509 | 131509 | -2671 | 25752 | AN6533 |
| 157  | CONTIG109 | 134046 | 134315 | 3.03 | 0.00E+00 | transcription_start_site | - | 130469 | 130469 | -3711 | 25753 | AN6533 |
| 948  | CONTIG109 | 134646 | 135213 | 1.96 | 8.81E-03 | transcription_start_site | - | 131772 | 131772 | -3157 | 25751 | AN6533 |
| 948  | CONTIG109 | 134646 | 135213 | 1.96 | 8.81E-03 | transcription_start_site | - | 131509 | 131509 | -3420 | 25752 | AN6533 |
| 948  | CONTIG109 | 134646 | 135213 | 1.96 | 8.81E-03 | transcription_start_site | - | 130469 | 130469 | -4460 | 25753 | AN6533 |
| 40   | CONTIG109 | 135836 | 136110 | 3.48 | 0.00E+00 | transcription_start_site | + | 136807 | 136807 | -834  | 25754 | AN6534 |
| 40   | CONTIG109 | 135836 | 136110 | 3.48 | 0.00E+00 | transcription_start_site | + | 137134 | 137134 | -1161 | 25755 | AN6534 |
| 40   | CONTIG109 | 135836 | 136110 | 3.48 | 0.00E+00 | transcription_start_site | + | 137342 | 137342 | -1369 | 25756 | AN6534 |
| 157  | CONTIG109 | 134046 | 134315 | 3.03 | 0.00E+00 | transcription_start_site | + | 136807 | 136807 | -2626 | 25754 | AN6534 |
| 157  | CONTIG109 | 134046 | 134315 | 3.03 | 0.00E+00 | transcription_start_site | + | 137134 | 137134 | -2953 | 25755 | AN6534 |
| 157  | CONTIG109 | 134046 | 134315 | 3.03 | 0.00E+00 | transcription_start_site | + | 137342 | 137342 | -3161 | 25756 | AN6534 |
| 948  | CONTIG109 | 134646 | 135213 | 1.96 | 8.81E-03 | transcription_start_site | + | 136807 | 136807 | -1877 | 25754 | AN6534 |
| 948  | CONTIG109 | 134646 | 135213 | 1.96 | 8.81E-03 | transcription_start_site | + | 137134 | 137134 | -2204 | 25755 | AN6534 |
| 948  | CONTIG109 | 134646 | 135213 | 1.96 | 8.81E-03 | transcription_start_site | + | 137342 | 137342 | -2412 | 25756 | AN6534 |
| 40   | CONTIG109 | 135836 | 136110 | 3.48 | 0.00E+00 | transcription_start_site | + | 138918 | 138918 | -2945 | 25757 | AN6535 |
| 40   | CONTIG109 | 135836 | 136110 | 3.48 | 0.00E+00 | transcription_start_site | + | 139317 | 139317 | -3344 | 25758 | AN6535 |
| 157  | CONTIG109 | 134046 | 134315 | 3.03 | 0.00E+00 | transcription_start_site | + | 138918 | 138918 | -4737 | 25757 | AN6535 |
| 948  | CONTIG109 | 134646 | 135213 | 1.96 | 8.81E-03 | transcription_start_site | + | 138918 | 138918 | -3988 | 25757 | AN6535 |
| 948  | CONTIG109 | 134646 | 135213 | 1.96 | 8.81E-03 | transcription_start_site | + | 139317 | 139317 | -4387 | 25758 | AN6535 |
| 593  | CONTIG109 | 142745 | 143004 | 2.32 | 1.80E-03 | transcription_start_site | - | 140613 | 140613 | -2261 | 25759 | AN6536 |
| 593  | CONTIG109 | 142745 | 143004 | 2.32 | 1.80E-03 | transcription_start_site | - | 140234 | 140234 | -2640 | 25760 | AN6536 |
| 40   | CONTIG109 | 135836 | 136110 | 3.48 | 0.00E+00 | transcription_start_site | + | 140941 | 140941 | -4968 | 25761 | AN6537 |
| 593  | CONTIG109 | 142745 | 143004 | 2.32 | 1.80E-03 | transcription_start_site | + | 143660 | 143660 | -785  | 25763 | AN6538 |
| 1109 | CONTIG109 | 157061 | 157502 | 1.83 | 1.57E-02 | transcription_start_site | - | 156884 | 156884 | -397  | 25773 | AN6542 |
| 1109 | CONTIG109 | 157061 | 157502 | 1.83 | 1.57E-02 | transcription_start_site | - | 156765 | 156765 | -516  | 25774 | AN6542 |
| 1109 | CONTIG109 | 157061 | 157502 | 1.83 | 1.57E-02 | transcription_start_site | - | 156500 | 156500 | -781  | 25775 | AN6542 |
| 1109 | CONTIG109 | 157061 | 157502 | 1.83 | 1.57E-02 | transcription_start_site | - | 156249 | 156249 | -1032 | 25776 | AN6542 |
| 1109 | CONTIG109 | 157061 | 157502 | 1.83 | 1.57E-02 | transcription_start_site | - | 156158 | 156158 | -1123 | 25777 | AN6542 |
| 1109 | CONTIG109 | 157061 | 157502 | 1.83 | 1.57E-02 | transcription_start_site | - | 155329 | 155329 | -1952 | 25778 | AN6542 |
| 1109 | CONTIG109 | 157061 | 157502 | 1.83 | 1.57E-02 | transcription_start_site | + | 158364 | 158364 | -1082 | 25779 | AN6543 |
| 1370 | CONTIG109 | 170267 | 170601 | 1.65 | 1.81E-02 | transcription_start_site | - | 165691 | 165691 | -4743 | 25792 | AN6548 |
| 1370 | CONTIG109 | 170267 | 170601 | 1.65 | 1.81E-02 | transcription_start_site | - | 165490 | 165490 | -4944 | 25793 | AN6548 |
| 1370 | CONTIG109 | 170267 | 170601 | 1.65 | 1.81E-02 | transcription_start_site | - | 167136 | 167136 | -3298 | 25794 | AN6549 |
| 1370 | CONTIG109 | 170267 | 170601 | 1.65 | 1.81E-02 | transcription_start_site | - | 166975 | 166975 | -3459 | 25795 | AN6549 |
| 1370 | CONTIG109 | 170267 | 170601 | 1.65 | 1.81E-02 | transcription_start_site | - | 170070 | 170070 | -364  | 25796 | AN6550 |
| 1307 | CONTIG109 | 176937 | 177501 | 1.69 | 2.62E-02 | transcription_start_site | - | 176191 | 176191 | -1028 | 25797 | AN6551 |
| 1307 | CONTIG109 | 176937 | 177501 | 1.69 | 2.62E-02 | transcription_start_site | - | 175998 | 175998 | -1221 | 25798 | AN6551 |
| 1307 | CONTIG109 | 176937 | 177501 | 1.69 | 2.62E-02 | transcription_start_site | - | 175893 | 175893 | -1326 | 25799 | AN6551 |
| 1307 | CONTIG109 | 176937 | 177501 | 1.69 | 2.62E-02 | transcription_start_site | - | 175620 | 175620 | -1599 | 25800 | AN6551 |
| 1307 | CONTIG109 | 176937 | 177501 | 1.69 | 2.62E-02 | transcription_start_site | - | 172247 | 172247 | -4972 | 25801 | AN6551 |
| 1307 | CONTIG109 | 176937 | 177501 | 1.69 | 2.62E-02 | transcription_start_site | - | 172158 | 172158 | -5061 | 25802 | AN6551 |
| 1370 | CONTIG109 | 170267 | 170601 | 1.65 | 1.81E-02 | transcription_start_site | - | 170659 | 170659 | 225   | 25804 | AN6551 |
| 1552 | CONTIG109 | 180527 | 180956 | 1.56 | 4.36E-02 | transcription_start_site | - | 176191 | 176191 | -4550 | 25797 | AN6551 |
| 1552 | CONTIG109 | 180527 | 180956 | 1.56 | 4.36E-02 | transcription_start_site | - | 175998 | 175998 | -4743 | 25798 | AN6551 |
| 1552 | CONTIG109 | 180527 | 180956 | 1.56 | 4.36E-02 | transcription_start_site | - | 175893 | 175893 | -4848 | 25799 | AN6551 |
| 1552 | CONTIG109 | 180527 | 180956 | 1.56 | 4.36E-02 | transcription_start_site | - | 175620 | 175620 | -5121 | 25800 | AN6551 |
| 1307 | CONTIG109 | 176937 | 177501 | 1.69 | 2.62E-02 | transcription_start_site | + | 178658 | 178658 | -1439 | 25805 | AN6552 |
| 1307 | CONTIG109 | 176937 | 177501 | 1.69 | 2.62E-02 | transcription_start_site | + | 180576 | 180576 | -3357 | 25806 | AN6553 |
| 1307 | CONTIG109 | 176937 | 177501 | 1.69 | 2.62E-02 | transcription_start_site | + | 181465 | 181465 | -4246 | 25807 | AN6553 |
| 1307 | CONTIG109 | 176937 | 177501 | 1.69 | 2.62E-02 | transcription_start_site | + | 181704 | 181704 | -4485 | 25808 | AN6553 |
| 1307 | CONTIG109 | 176937 | 177501 | 1.69 | 2.62E-02 | transcription_start_site | + | 181866 | 181866 | -4647 | 25809 | AN6553 |
| 1307 | CONTIG109 | 176937 | 177501 | 1.69 | 2.62E-02 | transcription_start_site | + | 182345 | 182345 | -5126 | 25810 | AN6553 |

|      |           |        |        |      |          |                          |   |        |        |       |       |        |
|------|-----------|--------|--------|------|----------|--------------------------|---|--------|--------|-------|-------|--------|
| 1552 | CONTIG109 | 180527 | 180956 | 1.56 | 4.36E-02 | transcription_start_site | + | 180576 | 180576 | 165   | 25806 | AN6553 |
| 1552 | CONTIG109 | 180527 | 180956 | 1.56 | 4.36E-02 | transcription_start_site | + | 181465 | 181465 | -723  | 25807 | AN6553 |
| 1552 | CONTIG109 | 180527 | 180956 | 1.56 | 4.36E-02 | transcription_start_site | + | 181704 | 181704 | -962  | 25808 | AN6553 |
| 1552 | CONTIG109 | 180527 | 180956 | 1.56 | 4.36E-02 | transcription_start_site | + | 181866 | 181866 | -1124 | 25809 | AN6553 |
| 1552 | CONTIG109 | 180527 | 180956 | 1.56 | 4.36E-02 | transcription_start_site | + | 182345 | 182345 | -1603 | 25810 | AN6553 |
| 1552 | CONTIG109 | 180527 | 180956 | 1.56 | 4.36E-02 | transcription_start_site | + | 182665 | 182665 | -1923 | 25811 | AN6553 |
| 1552 | CONTIG109 | 180527 | 180956 | 1.56 | 4.36E-02 | transcription_start_site | + | 185536 | 185536 | -4794 | 25814 | AN6555 |
| 1552 | CONTIG109 | 180527 | 180956 | 1.56 | 4.36E-02 | transcription_start_site | + | 185717 | 185717 | -4975 | 25815 | AN6555 |
| 1552 | CONTIG109 | 180527 | 180956 | 1.56 | 4.36E-02 | transcription_start_site | + | 185812 | 185812 | -5070 | 25816 | AN6555 |
| 2364 | CONTIG109 | 195455 | 195959 | 1.25 | 1.25E-01 | transcription_start_site | - | 190632 | 190632 | -5075 | 25829 | AN6558 |
| 1861 | CONTIG109 | 196290 | 196789 | 1.43 | 6.84E-02 | transcription_start_site | - | 192715 | 192715 | -3824 | 25833 | AN6559 |
| 2364 | CONTIG109 | 195455 | 195959 | 1.25 | 1.25E-01 | transcription_start_site | - | 192715 | 192715 | -2992 | 25833 | AN6559 |
| 1861 | CONTIG109 | 196290 | 196789 | 1.43 | 6.84E-02 | transcription_start_site | + | 196075 | 196075 | 464   | 25835 | AN6560 |
| 1861 | CONTIG109 | 196290 | 196789 | 1.43 | 6.84E-02 | transcription_start_site | + | 195824 | 195824 | 715   | 25834 | AN6560 |
| 2364 | CONTIG109 | 195455 | 195959 | 1.25 | 1.25E-01 | transcription_start_site | + | 195824 | 195824 | -117  | 25834 | AN6560 |
| 2364 | CONTIG109 | 195455 | 195959 | 1.25 | 1.25E-01 | transcription_start_site | + | 196075 | 196075 | -368  | 25835 | AN6560 |
| 1861 | CONTIG109 | 196290 | 196789 | 1.43 | 6.84E-02 | transcription_start_site | + | 199604 | 199604 | -3064 | 25838 | AN6562 |
| 2364 | CONTIG109 | 195455 | 195959 | 1.25 | 1.25E-01 | transcription_start_site | + | 199604 | 199604 | -3897 | 25838 | AN6562 |
| 1858 | CONTIG109 | 217505 | 217929 | 1.43 | 4.42E-02 | transcription_start_site | - | 212763 | 212763 | -4954 | 25848 | AN6566 |
| 1858 | CONTIG109 | 217505 | 217929 | 1.43 | 4.42E-02 | transcription_start_site | - | 212642 | 212642 | -5075 | 25849 | AN6566 |
| 1858 | CONTIG109 | 217505 | 217929 | 1.43 | 4.42E-02 | transcription_start_site | - | 212537 | 212537 | -5180 | 25850 | AN6566 |
| 1858 | CONTIG109 | 217505 | 217929 | 1.43 | 4.42E-02 | transcription_start_site | - | 217388 | 217388 | -329  | 25857 | AN6568 |
| 1858 | CONTIG109 | 217505 | 217929 | 1.43 | 4.42E-02 | transcription_start_site | - | 217115 | 217115 | -602  | 25858 | AN6568 |
| 1858 | CONTIG109 | 217505 | 217929 | 1.43 | 4.42E-02 | transcription_start_site | - | 216453 | 216453 | -1264 | 25859 | AN6568 |
| 1858 | CONTIG109 | 217505 | 217929 | 1.43 | 4.42E-02 | transcription_start_site | - | 216165 | 216165 | -1552 | 25860 | AN6568 |
| 2736 | CONTIG109 | 220743 | 221092 | 1.11 | 1.79E-01 | transcription_start_site | - | 217388 | 217388 | -3529 | 25857 | AN6568 |
| 2736 | CONTIG109 | 220743 | 221092 | 1.11 | 1.79E-01 | transcription_start_site | - | 217115 | 217115 | -3802 | 25858 | AN6568 |
| 2736 | CONTIG109 | 220743 | 221092 | 1.11 | 1.79E-01 | transcription_start_site | - | 216453 | 216453 | -4464 | 25859 | AN6568 |
| 2736 | CONTIG109 | 220743 | 221092 | 1.11 | 1.79E-01 | transcription_start_site | - | 216165 | 216165 | -4752 | 25860 | AN6568 |
| 1858 | CONTIG109 | 217505 | 217929 | 1.43 | 4.42E-02 | transcription_start_site | + | 217849 | 217849 | -132  | 25861 | AN6569 |
| 1858 | CONTIG109 | 217505 | 217929 | 1.43 | 4.42E-02 | transcription_start_site | + | 218267 | 218267 | -550  | 25862 | AN6569 |
| 2736 | CONTIG109 | 220743 | 221092 | 1.11 | 1.79E-01 | transcription_start_site | - | 221148 | 221148 | 230   | 25863 | AN6570 |
| 2736 | CONTIG109 | 220743 | 221092 | 1.11 | 1.79E-01 | transcription_start_site | - | 220310 | 220310 | -607  | 25864 | AN6570 |
| 2736 | CONTIG109 | 220743 | 221092 | 1.11 | 1.79E-01 | transcription_start_site | + | 223193 | 223193 | -2275 | 25865 | AN6571 |
| 2736 | CONTIG109 | 220743 | 221092 | 1.11 | 1.79E-01 | transcription_start_site | + | 224771 | 224771 | -3853 | 25866 | AN6571 |
| 70   | CONTIG110 | 10726  | 11398  | 3.32 | 0.00E+00 | transcription_start_site | + | 13248  | 13248  | -2186 | 25885 | AN6578 |
| 158  | CONTIG110 | 12454  | 12803  | 3.03 | 0.00E+00 | transcription_start_site | + | 13248  | 13248  | -619  | 25885 | AN6578 |
| 1066 | CONTIG110 | 9001   | 10340  | 1.85 | 0.00E+00 | transcription_start_site | + | 13248  | 13248  | -3577 | 25885 | AN6578 |
| 1220 | CONTIG110 | 13732  | 14236  | 1.75 | 3.08E-02 | transcription_start_site | + | 13248  | 13248  | 736   | 25885 | AN6578 |
| 402  | CONTIG110 | 22069  | 22329  | 2.6  | 1.01E-03 | transcription_start_site | - | 18275  | 18275  | -3924 | 25886 | AN6579 |
| 402  | CONTIG110 | 22069  | 22329  | 2.6  | 1.01E-03 | transcription_start_site | - | 17232  | 17232  | -4967 | 25887 | AN6579 |
| 402  | CONTIG110 | 22069  | 22329  | 2.6  | 1.01E-03 | transcription_start_site | + | 22765  | 22765  | -566  | 25892 | AN6581 |
| 2119 | CONTIG110 | 38942  | 39201  | 1.33 | 1.25E-01 | transcription_start_site | - | 34825  | 34825  | -4246 | 25904 | AN6584 |
| 2119 | CONTIG110 | 38942  | 39201  | 1.33 | 1.25E-01 | transcription_start_site | - | 34610  | 34610  | -4461 | 25905 | AN6584 |
| 2119 | CONTIG110 | 38942  | 39201  | 1.33 | 1.25E-01 | transcription_start_site | + | 38165  | 38165  | 906   | 25908 | AN6585 |
| 2119 | CONTIG110 | 38942  | 39201  | 1.33 | 1.25E-01 | transcription_start_site | - | 38808  | 38808  | -263  | 25910 | AN6586 |
| 2119 | CONTIG110 | 38942  | 39201  | 1.33 | 1.25E-01 | transcription_start_site | - | 39625  | 39625  | 553   | 25909 | AN6586 |
| 2119 | CONTIG110 | 38942  | 39201  | 1.33 | 1.25E-01 | transcription_start_site | - | 38459  | 38459  | -612  | 25911 | AN6586 |
| 1648 | CONTIG110 | 49727  | 50011  | 1.52 | 6.84E-02 | transcription_start_site | + | 50475  | 50475  | -606  | 25917 | AN6588 |
| 1648 | CONTIG110 | 49727  | 50011  | 1.52 | 6.84E-02 | transcription_start_site | + | 52347  | 52347  | -2478 | 25918 | AN6589 |
| 1648 | CONTIG110 | 49727  | 50011  | 1.52 | 6.84E-02 | transcription_start_site | + | 52645  | 52645  | -2776 | 25919 | AN6589 |
| 520  | CONTIG110 | 77046  | 77320  | 2.42 | 2.22E-03 | transcription_start_site | + | 77284  | 77284  | -101  | 25938 | AN6597 |
| 520  | CONTIG110 | 77046  | 77320  | 2.42 | 2.22E-03 | transcription_start_site | + | 78528  | 78528  | -1345 | 25939 | AN6597 |
| 1649 | CONTIG110 | 121881 | 122165 | 1.52 | 6.84E-02 | transcription_start_site | + | 122367 | 122367 | -344  | 25996 | AN6613 |
| 1649 | CONTIG110 | 121881 | 122165 | 1.52 | 6.84E-02 | transcription_start_site | + | 121555 | 121555 | 468   | 25995 | AN6613 |
| 1649 | CONTIG110 | 121881 | 122165 | 1.52 | 6.84E-02 | transcription_start_site | + | 122794 | 122794 | -771  | 25997 | AN6613 |
| 1649 | CONTIG110 | 121881 | 122165 | 1.52 | 6.84E-02 | transcription_start_site | + | 123411 | 123411 | -1388 | 25998 | AN6614 |

|      |           |        |        |      |          |                          |   |        |        |       |       |        |
|------|-----------|--------|--------|------|----------|--------------------------|---|--------|--------|-------|-------|--------|
| 1649 | CONTIG110 | 121881 | 122165 | 1.52 | 6.84E-02 | transcription_start_site | + | 125289 | 125289 | -3266 | 25999 | AN6614 |
| 2009 | CONTIG110 | 178351 | 178775 | 1.37 | 9.26E-02 | transcription_start_site | - | 174127 | 174127 | -4436 | 26036 | AN6627 |
| 2009 | CONTIG110 | 178351 | 178775 | 1.37 | 9.26E-02 | transcription_start_site | - | 173845 | 173845 | -4718 | 26037 | AN6627 |
| 2009 | CONTIG110 | 178351 | 178775 | 1.37 | 9.26E-02 | transcription_start_site | - | 173504 | 173504 | -5059 | 26038 | AN6627 |
| 2009 | CONTIG110 | 178351 | 178775 | 1.37 | 9.26E-02 | transcription_start_site | + | 177658 | 177658 | 905   | 26046 | AN6629 |
| 2009 | CONTIG110 | 178351 | 178775 | 1.37 | 9.26E-02 | transcription_start_site | + | 178708 | 178708 | -145  | 26048 | AN6630 |
| 2009 | CONTIG110 | 178351 | 178775 | 1.37 | 9.26E-02 | transcription_start_site | + | 178390 | 178390 | 173   | 26047 | AN6630 |
| 2009 | CONTIG110 | 178351 | 178775 | 1.37 | 9.26E-02 | transcription_start_site | + | 178828 | 178828 | -265  | 26049 | AN6630 |
| 2570 | CONTIG110 | 179566 | 179900 | 1.18 | 1.79E-01 | transcription_start_site | + | 178828 | 178828 | 905   | 26049 | AN6630 |
| 2570 | CONTIG110 | 179566 | 179900 | 1.18 | 1.79E-01 | transcription_start_site | + | 178708 | 178708 | 1025  | 26048 | AN6630 |
| 2009 | CONTIG110 | 178351 | 178775 | 1.37 | 9.26E-02 | transcription_start_site | + | 179567 | 179567 | -1004 | 26050 | AN6631 |
| 2009 | CONTIG110 | 178351 | 178775 | 1.37 | 9.26E-02 | transcription_start_site | + | 179654 | 179654 | -1091 | 26051 | AN6631 |
| 2009 | CONTIG110 | 178351 | 178775 | 1.37 | 9.26E-02 | transcription_start_site | + | 180112 | 180112 | -1549 | 26052 | AN6631 |
| 2009 | CONTIG110 | 178351 | 178775 | 1.37 | 9.26E-02 | transcription_start_site | + | 180256 | 180256 | -1693 | 26053 | AN6631 |
| 2570 | CONTIG110 | 179566 | 179900 | 1.18 | 1.79E-01 | transcription_start_site | + | 179654 | 179654 | 79    | 26051 | AN6631 |
| 2570 | CONTIG110 | 179566 | 179900 | 1.18 | 1.79E-01 | transcription_start_site | + | 179567 | 179567 | 166   | 26050 | AN6631 |
| 2570 | CONTIG110 | 179566 | 179900 | 1.18 | 1.79E-01 | transcription_start_site | + | 180112 | 180112 | -379  | 26052 | AN6631 |
| 2570 | CONTIG110 | 179566 | 179900 | 1.18 | 1.79E-01 | transcription_start_site | + | 180256 | 180256 | -523  | 26053 | AN6631 |
| 2009 | CONTIG110 | 178351 | 178775 | 1.37 | 9.26E-02 | transcription_start_site | + | 181189 | 181189 | -2626 | 26054 | AN6632 |
| 2009 | CONTIG110 | 178351 | 178775 | 1.37 | 9.26E-02 | transcription_start_site | + | 181420 | 181420 | -2857 | 26055 | AN6632 |
| 2009 | CONTIG110 | 178351 | 178775 | 1.37 | 9.26E-02 | transcription_start_site | + | 181616 | 181616 | -3053 | 26056 | AN6632 |
| 2570 | CONTIG110 | 179566 | 179900 | 1.18 | 1.79E-01 | transcription_start_site | + | 181189 | 181189 | -1456 | 26054 | AN6632 |
| 2570 | CONTIG110 | 179566 | 179900 | 1.18 | 1.79E-01 | transcription_start_site | + | 181420 | 181420 | -1687 | 26055 | AN6632 |
| 2570 | CONTIG110 | 179566 | 179900 | 1.18 | 1.79E-01 | transcription_start_site | + | 181616 | 181616 | -1883 | 26056 | AN6632 |
| 1022 | CONTIG110 | 183302 | 183825 | 1.89 | 9.21E-03 | transcription_start_site | - | 183068 | 183068 | -495  | 26057 | AN6633 |
| 1022 | CONTIG110 | 183302 | 183825 | 1.89 | 9.21E-03 | transcription_start_site | - | 182979 | 182979 | -584  | 26058 | AN6633 |
| 1022 | CONTIG110 | 183302 | 183825 | 1.89 | 9.21E-03 | transcription_start_site | + | 183911 | 183911 | -347  | 26059 | AN6634 |
| 1022 | CONTIG110 | 183302 | 183825 | 1.89 | 9.21E-03 | transcription_start_site | + | 184647 | 184647 | -1083 | 26060 | AN6634 |
| 2570 | CONTIG110 | 179566 | 179900 | 1.18 | 1.79E-01 | transcription_start_site | + | 183911 | 183911 | -4178 | 26059 | AN6634 |
| 2570 | CONTIG110 | 179566 | 179900 | 1.18 | 1.79E-01 | transcription_start_site | + | 184647 | 184647 | -4914 | 26060 | AN6634 |
| 1022 | CONTIG110 | 183302 | 183825 | 1.89 | 9.21E-03 | transcription_start_site | + | 185693 | 185693 | -2129 | 26061 | AN6635 |
| 1022 | CONTIG110 | 183302 | 183825 | 1.89 | 9.21E-03 | transcription_start_site | + | 185942 | 185942 | -2378 | 26062 | AN6635 |
| 1022 | CONTIG110 | 183302 | 183825 | 1.89 | 9.21E-03 | transcription_start_site | + | 186069 | 186069 | -2505 | 26063 | AN6635 |
| 1022 | CONTIG110 | 183302 | 183825 | 1.89 | 9.21E-03 | transcription_start_site | + | 186315 | 186315 | -2751 | 26064 | AN6635 |
| 1022 | CONTIG110 | 183302 | 183825 | 1.89 | 9.21E-03 | transcription_start_site | + | 186539 | 186539 | -2975 | 26065 | AN6635 |
| 1022 | CONTIG110 | 183302 | 183825 | 1.89 | 9.21E-03 | transcription_start_site | + | 186730 | 186730 | -3166 | 26066 | AN6635 |
| 2120 | CONTIG110 | 197492 | 197842 | 1.33 | 1.25E-01 | transcription_start_site | + | 196776 | 196776 | 891   | 26071 | AN6638 |
| 2120 | CONTIG110 | 197492 | 197842 | 1.33 | 1.25E-01 | transcription_start_site | + | 197653 | 197653 | 14    | 26072 | AN6639 |
| 2120 | CONTIG110 | 197492 | 197842 | 1.33 | 1.25E-01 | transcription_start_site | + | 198234 | 198234 | -567  | 26073 | AN6639 |
| 2120 | CONTIG110 | 197492 | 197842 | 1.33 | 1.25E-01 | transcription_start_site | + | 199064 | 199064 | -1397 | 26074 | AN6639 |
| 2120 | CONTIG110 | 197492 | 197842 | 1.33 | 1.25E-01 | transcription_start_site | + | 199301 | 199301 | -1634 | 26075 | AN6639 |
| 666  | CONTIG110 | 206328 | 207127 | 2.23 | 5.20E-03 | transcription_start_site | - | 201951 | 201951 | -4776 | 26076 | AN6640 |
| 666  | CONTIG110 | 206328 | 207127 | 2.23 | 5.20E-03 | transcription_start_site | - | 201799 | 201799 | -4928 | 26077 | AN6640 |
| 64   | CONTIG110 | 207903 | 208262 | 3.36 | 0.00E+00 | transcription_start_site | + | 208898 | 208898 | -815  | 26086 | AN6642 |
| 64   | CONTIG110 | 207903 | 208262 | 3.36 | 0.00E+00 | transcription_start_site | + | 209192 | 209192 | -1109 | 26087 | AN6642 |
| 64   | CONTIG110 | 207903 | 208262 | 3.36 | 0.00E+00 | transcription_start_site | + | 209505 | 209505 | -1422 | 26088 | AN6642 |
| 64   | CONTIG110 | 207903 | 208262 | 3.36 | 0.00E+00 | transcription_start_site | + | 211625 | 211625 | -3542 | 26089 | AN6642 |
| 666  | CONTIG110 | 206328 | 207127 | 2.23 | 5.20E-03 | transcription_start_site | + | 208898 | 208898 | -2170 | 26086 | AN6642 |
| 666  | CONTIG110 | 206328 | 207127 | 2.23 | 5.20E-03 | transcription_start_site | + | 209192 | 209192 | -2464 | 26087 | AN6642 |
| 666  | CONTIG110 | 206328 | 207127 | 2.23 | 5.20E-03 | transcription_start_site | + | 209505 | 209505 | -2777 | 26088 | AN6642 |
| 666  | CONTIG110 | 206328 | 207127 | 2.23 | 5.20E-03 | transcription_start_site | + | 211625 | 211625 | -4897 | 26089 | AN6642 |
| 1637 | CONTIG110 | 214368 | 214709 | 1.52 | 5.05E-02 | transcription_start_site | - | 214441 | 214441 | -97   | 26090 | AN6643 |
| 1637 | CONTIG110 | 214368 | 214709 | 1.52 | 5.05E-02 | transcription_start_site | - | 214134 | 214134 | -404  | 26091 | AN6643 |
| 1650 | CONTIG110 | 215718 | 215992 | 1.52 | 6.84E-02 | transcription_start_site | - | 214441 | 214441 | -1414 | 26090 | AN6643 |
| 1650 | CONTIG110 | 215718 | 215992 | 1.52 | 6.84E-02 | transcription_start_site | - | 214134 | 214134 | -1721 | 26091 | AN6643 |
| 1637 | CONTIG110 | 214368 | 214709 | 1.52 | 5.05E-02 | transcription_start_site | - | 215527 | 215527 | 988   | 26096 | AN6644 |
| 1650 | CONTIG110 | 215718 | 215992 | 1.52 | 6.84E-02 | transcription_start_site | - | 216177 | 216177 | 322   | 26095 | AN6644 |

|                |        |        |      |          |                          |   |        |        |       |       |        |
|----------------|--------|--------|------|----------|--------------------------|---|--------|--------|-------|-------|--------|
| 1650 CONTIG110 | 215718 | 215992 | 1.52 | 6.84E-02 | transcription_start_site | - | 215527 | 215527 | -328  | 26096 | AN6644 |
| 1637 CONTIG110 | 214368 | 214709 | 1.52 | 5.05E-02 | transcription_start_site | + | 218657 | 218657 | -4118 | 26097 | AN6645 |
| 1637 CONTIG110 | 214368 | 214709 | 1.52 | 5.05E-02 | transcription_start_site | + | 219475 | 219475 | -4936 | 26098 | AN6645 |
| 1650 CONTIG110 | 215718 | 215992 | 1.52 | 6.84E-02 | transcription_start_site | + | 218657 | 218657 | -2802 | 26097 | AN6645 |
| 1650 CONTIG110 | 215718 | 215992 | 1.52 | 6.84E-02 | transcription_start_site | + | 219475 | 219475 | -3620 | 26098 | AN6645 |
| 2014 CONTIG110 | 228908 | 229270 | 1.37 | 1.08E-01 | transcription_start_site | - | 227717 | 227717 | -1372 | 26102 | AN6648 |
| 2014 CONTIG110 | 228908 | 229270 | 1.37 | 1.08E-01 | transcription_start_site | - | 227387 | 227387 | -1702 | 26103 | AN6648 |
| 2014 CONTIG110 | 228908 | 229270 | 1.37 | 1.08E-01 | transcription_start_site | - | 227067 | 227067 | -2022 | 26104 | AN6648 |
| 2571 CONTIG110 | 231171 | 231747 | 1.18 | 1.79E-01 | transcription_start_site | - | 227717 | 227717 | -3742 | 26102 | AN6648 |
| 2571 CONTIG110 | 231171 | 231747 | 1.18 | 1.79E-01 | transcription_start_site | - | 227387 | 227387 | -4072 | 26103 | AN6648 |
| 2571 CONTIG110 | 231171 | 231747 | 1.18 | 1.79E-01 | transcription_start_site | - | 227067 | 227067 | -4392 | 26104 | AN6648 |
| 2014 CONTIG110 | 228908 | 229270 | 1.37 | 1.08E-01 | transcription_start_site | + | 229295 | 229295 | -206  | 26109 | AN6649 |
| 2014 CONTIG110 | 228908 | 229270 | 1.37 | 1.08E-01 | transcription_start_site | + | 228572 | 228572 | 517   | 26108 | AN6649 |
| 2014 CONTIG110 | 228908 | 229270 | 1.37 | 1.08E-01 | transcription_start_site | + | 228500 | 228500 | 589   | 26107 | AN6649 |
| 2014 CONTIG110 | 228908 | 229270 | 1.37 | 1.08E-01 | transcription_start_site | + | 228292 | 228292 | 797   | 26106 | AN6649 |
| 2014 CONTIG110 | 228908 | 229270 | 1.37 | 1.08E-01 | transcription_start_site | + | 228139 | 228139 | 950   | 26105 | AN6649 |
| 2571 CONTIG110 | 231171 | 231747 | 1.18 | 1.79E-01 | transcription_start_site | - | 230995 | 230995 | -464  | 26112 | AN6650 |
| 2571 CONTIG110 | 231171 | 231747 | 1.18 | 1.79E-01 | transcription_start_site | - | 232178 | 232178 | 719   | 26111 | AN6650 |
| 2571 CONTIG110 | 231171 | 231747 | 1.18 | 1.79E-01 | transcription_start_site | - | 232321 | 232321 | 862   | 26110 | AN6650 |
| 2014 CONTIG110 | 228908 | 229270 | 1.37 | 1.08E-01 | transcription_start_site | + | 233393 | 233393 | -4304 | 26113 | AN6651 |
| 2571 CONTIG110 | 231171 | 231747 | 1.18 | 1.79E-01 | transcription_start_site | + | 233393 | 233393 | -1934 | 26113 | AN6651 |
| 2571 CONTIG110 | 231171 | 231747 | 1.18 | 1.79E-01 | transcription_start_site | + | 235506 | 235506 | -4047 | 26114 | AN6651 |
| 2571 CONTIG110 | 231171 | 231747 | 1.18 | 1.79E-01 | transcription_start_site | + | 236132 | 236132 | -4673 | 26115 | AN6651 |
| 516 CONTIG110  | 242854 | 243667 | 2.42 | 0.00E+00 | transcription_start_site | - | 242721 | 242721 | -539  | 26119 | AN6653 |
| 516 CONTIG110  | 242854 | 243667 | 2.42 | 0.00E+00 | transcription_start_site | - | 242306 | 242306 | -954  | 26120 | AN6653 |
| 516 CONTIG110  | 242854 | 243667 | 2.42 | 0.00E+00 | transcription_start_site | - | 241835 | 241835 | -1425 | 26121 | AN6653 |
| 516 CONTIG110  | 242854 | 243667 | 2.42 | 0.00E+00 | transcription_start_site | - | 241586 | 241586 | -1674 | 26122 | AN6653 |
| 516 CONTIG110  | 242854 | 243667 | 2.42 | 0.00E+00 | transcription_start_site | - | 241178 | 241178 | -2082 | 26123 | AN6653 |
| 516 CONTIG110  | 242854 | 243667 | 2.42 | 0.00E+00 | transcription_start_site | - | 243814 | 243814 | 553   | 26128 | AN6654 |
| 516 CONTIG110  | 242854 | 243667 | 2.42 | 0.00E+00 | transcription_start_site | - | 244554 | 244554 | 1293  | 26127 | AN6654 |
| 516 CONTIG110  | 242854 | 243667 | 2.42 | 0.00E+00 | transcription_start_site | - | 244654 | 244654 | 1393  | 26126 | AN6654 |
| 1141 CONTIG110 | 249920 | 250179 | 1.8  | 2.62E-02 | transcription_start_site | - | 245419 | 245419 | -4630 | 26124 | AN6654 |
| 1141 CONTIG110 | 249920 | 250179 | 1.8  | 2.62E-02 | transcription_start_site | - | 244941 | 244941 | -5108 | 26125 | AN6654 |
| 1778 CONTIG110 | 248339 | 248618 | 1.47 | 8.01E-02 | transcription_start_site | - | 245419 | 245419 | -3059 | 26124 | AN6654 |
| 1778 CONTIG110 | 248339 | 248618 | 1.47 | 8.01E-02 | transcription_start_site | - | 244941 | 244941 | -3537 | 26125 | AN6654 |
| 1778 CONTIG110 | 248339 | 248618 | 1.47 | 8.01E-02 | transcription_start_site | - | 244654 | 244654 | -3824 | 26126 | AN6654 |
| 1778 CONTIG110 | 248339 | 248618 | 1.47 | 8.01E-02 | transcription_start_site | - | 244554 | 244554 | -3924 | 26127 | AN6654 |
| 1778 CONTIG110 | 248339 | 248618 | 1.47 | 8.01E-02 | transcription_start_site | - | 243814 | 243814 | -4664 | 26128 | AN6654 |
| 516 CONTIG110  | 242854 | 243667 | 2.42 | 0.00E+00 | transcription_start_site | + | 245924 | 245924 | -2663 | 26129 | AN6655 |
| 516 CONTIG110  | 242854 | 243667 | 2.42 | 0.00E+00 | transcription_start_site | + | 246050 | 246050 | -2789 | 26130 | AN6655 |
| 516 CONTIG110  | 242854 | 243667 | 2.42 | 0.00E+00 | transcription_start_site | + | 246643 | 246643 | -3382 | 26131 | AN6655 |
| 516 CONTIG110  | 242854 | 243667 | 2.42 | 0.00E+00 | transcription_start_site | + | 246877 | 246877 | -3616 | 26132 | AN6655 |
| 1141 CONTIG110 | 249920 | 250179 | 1.8  | 2.62E-02 | transcription_start_site | - | 248733 | 248733 | -1316 | 26133 | AN6656 |
| 1141 CONTIG110 | 249920 | 250179 | 1.8  | 2.62E-02 | transcription_start_site | - | 248008 | 248008 | -2041 | 26134 | AN6656 |
| 1141 CONTIG110 | 249920 | 250179 | 1.8  | 2.62E-02 | transcription_start_site | - | 247779 | 247779 | -2270 | 26135 | AN6656 |
| 1778 CONTIG110 | 248339 | 248618 | 1.47 | 8.01E-02 | transcription_start_site | - | 248733 | 248733 | 254   | 26133 | AN6656 |
| 1778 CONTIG110 | 248339 | 248618 | 1.47 | 8.01E-02 | transcription_start_site | - | 248008 | 248008 | -470  | 26134 | AN6656 |
| 1778 CONTIG110 | 248339 | 248618 | 1.47 | 8.01E-02 | transcription_start_site | - | 247779 | 247779 | -699  | 26135 | AN6656 |
| 1779 CONTIG110 | 253445 | 253794 | 1.47 | 8.01E-02 | transcription_start_site | - | 248733 | 248733 | -4886 | 26133 | AN6656 |
| 1141 CONTIG110 | 249920 | 250179 | 1.8  | 2.62E-02 | transcription_start_site | + | 250142 | 250142 | -92   | 26136 | AN6657 |
| 1141 CONTIG110 | 249920 | 250179 | 1.8  | 2.62E-02 | transcription_start_site | + | 250280 | 250280 | -230  | 26137 | AN6657 |
| 1778 CONTIG110 | 248339 | 248618 | 1.47 | 8.01E-02 | transcription_start_site | + | 250142 | 250142 | -1663 | 26136 | AN6657 |
| 1778 CONTIG110 | 248339 | 248618 | 1.47 | 8.01E-02 | transcription_start_site | + | 250280 | 250280 | -1801 | 26137 | AN6657 |
| 1141 CONTIG110 | 249920 | 250179 | 1.8  | 2.62E-02 | transcription_start_site | + | 251334 | 251334 | -1284 | 26138 | AN6658 |
| 1141 CONTIG110 | 249920 | 250179 | 1.8  | 2.62E-02 | transcription_start_site | + | 251507 | 251507 | -1457 | 26139 | AN6658 |
| 1141 CONTIG110 | 249920 | 250179 | 1.8  | 2.62E-02 | transcription_start_site | + | 251583 | 251583 | -1533 | 26140 | AN6658 |
| 1141 CONTIG110 | 249920 | 250179 | 1.8  | 2.62E-02 | transcription_start_site | + | 251756 | 251756 | -1706 | 26141 | AN6658 |

|      |           |        |        |      |          |                          |   |        |        |       |       |        |
|------|-----------|--------|--------|------|----------|--------------------------|---|--------|--------|-------|-------|--------|
| 1141 | CONTIG110 | 249920 | 250179 | 1.8  | 2.62E-02 | transcription_start_site | + | 252157 | 252157 | -2107 | 26142 | AN6658 |
| 1778 | CONTIG110 | 248339 | 248618 | 1.47 | 8.01E-02 | transcription_start_site | + | 251334 | 251334 | -2855 | 26138 | AN6658 |
| 1778 | CONTIG110 | 248339 | 248618 | 1.47 | 8.01E-02 | transcription_start_site | + | 251507 | 251507 | -3028 | 26139 | AN6658 |
| 1778 | CONTIG110 | 248339 | 248618 | 1.47 | 8.01E-02 | transcription_start_site | + | 251583 | 251583 | -3104 | 26140 | AN6658 |
| 1778 | CONTIG110 | 248339 | 248618 | 1.47 | 8.01E-02 | transcription_start_site | + | 251756 | 251756 | -3277 | 26141 | AN6658 |
| 1778 | CONTIG110 | 248339 | 248618 | 1.47 | 8.01E-02 | transcription_start_site | + | 252157 | 252157 | -3678 | 26142 | AN6658 |
| 491  | CONTIG110 | 268596 | 269090 | 2.46 | 1.80E-03 | transcription_start_site | - | 263898 | 263898 | -4945 | 26148 | AN6661 |
| 491  | CONTIG110 | 268596 | 269090 | 2.46 | 1.80E-03 | transcription_start_site | + | 270689 | 270689 | -1846 | 26153 | AN6663 |
| 491  | CONTIG110 | 268596 | 269090 | 2.46 | 1.80E-03 | transcription_start_site | + | 270843 | 270843 | -2000 | 26154 | AN6663 |
| 491  | CONTIG110 | 268596 | 269090 | 2.46 | 1.80E-03 | transcription_start_site | + | 271709 | 271709 | -2866 | 26155 | AN6663 |
| 2574 | CONTIG110 | 282396 | 283495 | 1.18 | 1.99E-01 | transcription_start_site | - | 281038 | 281038 | -1907 | 26163 | AN6666 |
| 201  | CONTIG110 | 288621 | 289045 | 2.94 | 0.00E+00 | transcription_start_site | - | 283649 | 283649 | -5184 | 26164 | AN6667 |
| 716  | CONTIG110 | 287851 | 288575 | 2.18 | 2.49E-03 | transcription_start_site | - | 283649 | 283649 | -4564 | 26164 | AN6667 |
| 716  | CONTIG110 | 287851 | 288575 | 2.18 | 2.49E-03 | transcription_start_site | - | 283468 | 283468 | -4745 | 26165 | AN6667 |
| 2574 | CONTIG110 | 282396 | 283495 | 1.18 | 1.99E-01 | transcription_start_site | - | 283468 | 283468 | 522   | 26165 | AN6667 |
| 2574 | CONTIG110 | 282396 | 283495 | 1.18 | 1.99E-01 | transcription_start_site | - | 283649 | 283649 | 703   | 26164 | AN6667 |
| 201  | CONTIG110 | 288621 | 289045 | 2.94 | 0.00E+00 | transcription_start_site | - | 285281 | 285281 | -3552 | 26166 | AN6668 |
| 201  | CONTIG110 | 288621 | 289045 | 2.94 | 0.00E+00 | transcription_start_site | - | 285175 | 285175 | -3658 | 26167 | AN6668 |
| 201  | CONTIG110 | 288621 | 289045 | 2.94 | 0.00E+00 | transcription_start_site | - | 285049 | 285049 | -3784 | 26168 | AN6668 |
| 201  | CONTIG110 | 288621 | 289045 | 2.94 | 0.00E+00 | transcription_start_site | - | 284743 | 284743 | -4090 | 26169 | AN6668 |
| 716  | CONTIG110 | 287851 | 288575 | 2.18 | 2.49E-03 | transcription_start_site | - | 285281 | 285281 | -2932 | 26166 | AN6668 |
| 716  | CONTIG110 | 287851 | 288575 | 2.18 | 2.49E-03 | transcription_start_site | - | 285175 | 285175 | -3038 | 26167 | AN6668 |
| 716  | CONTIG110 | 287851 | 288575 | 2.18 | 2.49E-03 | transcription_start_site | - | 285049 | 285049 | -3164 | 26168 | AN6668 |
| 716  | CONTIG110 | 287851 | 288575 | 2.18 | 2.49E-03 | transcription_start_site | - | 284743 | 284743 | -3470 | 26169 | AN6668 |
| 1221 | CONTIG110 | 289510 | 290529 | 1.75 | 3.08E-02 | transcription_start_site | - | 285281 | 285281 | -4738 | 26166 | AN6668 |
| 1221 | CONTIG110 | 289510 | 290529 | 1.75 | 3.08E-02 | transcription_start_site | - | 285175 | 285175 | -4844 | 26167 | AN6668 |
| 1221 | CONTIG110 | 289510 | 290529 | 1.75 | 3.08E-02 | transcription_start_site | - | 285049 | 285049 | -4970 | 26168 | AN6668 |
| 1221 | CONTIG110 | 289510 | 290529 | 1.75 | 3.08E-02 | transcription_start_site | - | 284743 | 284743 | -5276 | 26169 | AN6668 |
| 201  | CONTIG110 | 288621 | 289045 | 2.94 | 0.00E+00 | transcription_start_site | - | 287716 | 287716 | -1117 | 26170 | AN6669 |
| 201  | CONTIG110 | 288621 | 289045 | 2.94 | 0.00E+00 | transcription_start_site | - | 287463 | 287463 | -1370 | 26171 | AN6669 |
| 201  | CONTIG110 | 288621 | 289045 | 2.94 | 0.00E+00 | transcription_start_site | - | 286664 | 286664 | -2169 | 26172 | AN6669 |
| 201  | CONTIG110 | 288621 | 289045 | 2.94 | 0.00E+00 | transcription_start_site | - | 286563 | 286563 | -2270 | 26173 | AN6669 |
| 716  | CONTIG110 | 287851 | 288575 | 2.18 | 2.49E-03 | transcription_start_site | - | 287716 | 287716 | -497  | 26170 | AN6669 |
| 716  | CONTIG110 | 287851 | 288575 | 2.18 | 2.49E-03 | transcription_start_site | - | 287463 | 287463 | -750  | 26171 | AN6669 |
| 716  | CONTIG110 | 287851 | 288575 | 2.18 | 2.49E-03 | transcription_start_site | - | 286664 | 286664 | -1549 | 26172 | AN6669 |
| 716  | CONTIG110 | 287851 | 288575 | 2.18 | 2.49E-03 | transcription_start_site | - | 286563 | 286563 | -1650 | 26173 | AN6669 |
| 1221 | CONTIG110 | 289510 | 290529 | 1.75 | 3.08E-02 | transcription_start_site | - | 287716 | 287716 | -2303 | 26170 | AN6669 |
| 1221 | CONTIG110 | 289510 | 290529 | 1.75 | 3.08E-02 | transcription_start_site | - | 287463 | 287463 | -2556 | 26171 | AN6669 |
| 1221 | CONTIG110 | 289510 | 290529 | 1.75 | 3.08E-02 | transcription_start_site | - | 286664 | 286664 | -3355 | 26172 | AN6669 |
| 1221 | CONTIG110 | 289510 | 290529 | 1.75 | 3.08E-02 | transcription_start_site | - | 286563 | 286563 | -3456 | 26173 | AN6669 |
| 2630 | CONTIG111 | 11795  | 12144  | 1.15 | 5.88E-02 | transcription_start_site | - | 10908  | 10908  | -1061 | 26186 | AN6674 |
| 2630 | CONTIG111 | 11795  | 12144  | 1.15 | 5.88E-02 | transcription_start_site | - | 10819  | 10819  | -1150 | 26187 | AN6674 |
| 2630 | CONTIG111 | 11795  | 12144  | 1.15 | 5.88E-02 | transcription_start_site | - | 10463  | 10463  | -1506 | 26188 | AN6674 |
| 2630 | CONTIG111 | 11795  | 12144  | 1.15 | 5.88E-02 | transcription_start_site | - | 10329  | 10329  | -1640 | 26189 | AN6674 |
| 2771 | CONTIG111 | 14940  | 15294  | 1.08 | 8.01E-02 | transcription_start_site | - | 10908  | 10908  | -4209 | 26186 | AN6674 |
| 2771 | CONTIG111 | 14940  | 15294  | 1.08 | 8.01E-02 | transcription_start_site | - | 10819  | 10819  | -4298 | 26187 | AN6674 |
| 2771 | CONTIG111 | 14940  | 15294  | 1.08 | 8.01E-02 | transcription_start_site | - | 10463  | 10463  | -4654 | 26188 | AN6674 |
| 2771 | CONTIG111 | 14940  | 15294  | 1.08 | 8.01E-02 | transcription_start_site | - | 10329  | 10329  | -4788 | 26189 | AN6674 |
| 2630 | CONTIG111 | 11795  | 12144  | 1.15 | 5.88E-02 | transcription_start_site | + | 11385  | 11385  | 584   | 26190 | AN6675 |
| 2630 | CONTIG111 | 11795  | 12144  | 1.15 | 5.88E-02 | transcription_start_site | + | 13918  | 13918  | -1948 | 26191 | AN6675 |
| 2630 | CONTIG111 | 11795  | 12144  | 1.15 | 5.88E-02 | transcription_start_site | + | 15577  | 15577  | -3607 | 26192 | AN6676 |
| 2630 | CONTIG111 | 11795  | 12144  | 1.15 | 5.88E-02 | transcription_start_site | + | 15680  | 15680  | -3710 | 26193 | AN6676 |
| 2630 | CONTIG111 | 11795  | 12144  | 1.15 | 5.88E-02 | transcription_start_site | + | 15846  | 15846  | -3876 | 26194 | AN6676 |
| 2630 | CONTIG111 | 11795  | 12144  | 1.15 | 5.88E-02 | transcription_start_site | + | 16243  | 16243  | -4273 | 26195 | AN6676 |
| 2771 | CONTIG111 | 14940  | 15294  | 1.08 | 8.01E-02 | transcription_start_site | + | 15577  | 15577  | -460  | 26192 | AN6676 |
| 2771 | CONTIG111 | 14940  | 15294  | 1.08 | 8.01E-02 | transcription_start_site | + | 15680  | 15680  | -563  | 26193 | AN6676 |
| 2771 | CONTIG111 | 14940  | 15294  | 1.08 | 8.01E-02 | transcription_start_site | + | 15846  | 15846  | -729  | 26194 | AN6676 |



|      |           |       |       |      |          |                          |   |       |       |       |       |        |
|------|-----------|-------|-------|------|----------|--------------------------|---|-------|-------|-------|-------|--------|
| 2771 | CONTIG111 | 14940 | 15294 | 1.08 | 8.01E-02 | transcription_start_site | + | 16243 | 16243 | -1126 | 26195 | AN6676 |
| 2771 | CONTIG111 | 14940 | 15294 | 1.08 | 8.01E-02 | transcription_start_site | + | 19455 | 19455 | -4338 | 26199 | AN6678 |
| 2771 | CONTIG111 | 14940 | 15294 | 1.08 | 8.01E-02 | transcription_start_site | + | 20032 | 20032 | -4915 | 26200 | AN6678 |
| 2206 | CONTIG111 | 27683 | 28702 | 1.29 | 1.81E-02 | transcription_start_site | - | 23346 | 23346 | -4846 | 26203 | AN6679 |
| 2206 | CONTIG111 | 27683 | 28702 | 1.29 | 1.81E-02 | transcription_start_site | - | 23087 | 23087 | -5105 | 26204 | AN6679 |
| 2206 | CONTIG111 | 27683 | 28702 | 1.29 | 1.81E-02 | transcription_start_site | - | 22726 | 22726 | -5466 | 26205 | AN6679 |
| 3023 | CONTIG111 | 26928 | 27352 | 0.87 | 1.93E-01 | transcription_start_site | - | 23346 | 23346 | -3794 | 26203 | AN6679 |
| 3023 | CONTIG111 | 26928 | 27352 | 0.87 | 1.93E-01 | transcription_start_site | - | 23087 | 23087 | -4053 | 26204 | AN6679 |
| 3023 | CONTIG111 | 26928 | 27352 | 0.87 | 1.93E-01 | transcription_start_site | - | 22726 | 22726 | -4414 | 26205 | AN6679 |
| 3023 | CONTIG111 | 26928 | 27352 | 0.87 | 1.93E-01 | transcription_start_site | - | 22625 | 22625 | -4515 | 26206 | AN6679 |
| 2206 | CONTIG111 | 27683 | 28702 | 1.29 | 1.81E-02 | transcription_start_site | + | 28848 | 28848 | -655  | 26207 | AN6680 |
| 2206 | CONTIG111 | 27683 | 28702 | 1.29 | 1.81E-02 | transcription_start_site | + | 28980 | 28980 | -787  | 26208 | AN6680 |
| 2206 | CONTIG111 | 27683 | 28702 | 1.29 | 1.81E-02 | transcription_start_site | + | 29117 | 29117 | -924  | 26209 | AN6680 |
| 3023 | CONTIG111 | 26928 | 27352 | 0.87 | 1.93E-01 | transcription_start_site | + | 28848 | 28848 | -1708 | 26207 | AN6680 |
| 3023 | CONTIG111 | 26928 | 27352 | 0.87 | 1.93E-01 | transcription_start_site | + | 28980 | 28980 | -1840 | 26208 | AN6680 |
| 3023 | CONTIG111 | 26928 | 27352 | 0.87 | 1.93E-01 | transcription_start_site | + | 29117 | 29117 | -1977 | 26209 | AN6680 |
| 3006 | CONTIG111 | 34284 | 34553 | 0.91 | 1.66E-01 | transcription_start_site | - | 34373 | 34373 | -45   | 26213 | AN6681 |
| 3006 | CONTIG111 | 34284 | 34553 | 0.91 | 1.66E-01 | transcription_start_site | - | 34887 | 34887 | 468   | 26212 | AN6681 |
| 3006 | CONTIG111 | 34284 | 34553 | 0.91 | 1.66E-01 | transcription_start_site | - | 34966 | 34966 | 547   | 26211 | AN6681 |
| 3006 | CONTIG111 | 34284 | 34553 | 0.91 | 1.66E-01 | transcription_start_site | - | 35046 | 35046 | 627   | 26210 | AN6681 |
| 3006 | CONTIG111 | 34284 | 34553 | 0.91 | 1.66E-01 | transcription_start_site | - | 33711 | 33711 | -707  | 26214 | AN6681 |
| 3006 | CONTIG111 | 34284 | 34553 | 0.91 | 1.66E-01 | transcription_start_site | - | 33401 | 33401 | -1017 | 26215 | AN6681 |
| 3006 | CONTIG111 | 34284 | 34553 | 0.91 | 1.66E-01 | transcription_start_site | - | 33140 | 33140 | -1278 | 26216 | AN6681 |
| 1264 | CONTIG111 | 31129 | 31641 | 1.71 | 4.46E-04 | transcription_start_site | + | 35431 | 35431 | -4046 | 26217 | AN6682 |
| 1264 | CONTIG111 | 31129 | 31641 | 1.71 | 4.46E-04 | transcription_start_site | + | 35570 | 35570 | -4185 | 26218 | AN6682 |
| 1264 | CONTIG111 | 31129 | 31641 | 1.71 | 4.46E-04 | transcription_start_site | + | 36379 | 36379 | -4994 | 26219 | AN6682 |
| 2205 | CONTIG111 | 30163 | 30954 | 1.29 | 1.20E-02 | transcription_start_site | + | 35431 | 35431 | -4872 | 26217 | AN6682 |
| 2205 | CONTIG111 | 30163 | 30954 | 1.29 | 1.20E-02 | transcription_start_site | + | 35570 | 35570 | -5011 | 26218 | AN6682 |
| 3006 | CONTIG111 | 34284 | 34553 | 0.91 | 1.66E-01 | transcription_start_site | + | 35431 | 35431 | -1012 | 26217 | AN6682 |
| 3006 | CONTIG111 | 34284 | 34553 | 0.91 | 1.66E-01 | transcription_start_site | + | 35570 | 35570 | -1151 | 26218 | AN6682 |
| 3006 | CONTIG111 | 34284 | 34553 | 0.91 | 1.66E-01 | transcription_start_site | + | 36379 | 36379 | -1960 | 26219 | AN6682 |
| 1787 | CONTIG111 | 47704 | 47993 | 1.46 | 1.30E-02 | transcription_start_site | - | 47412 | 47412 | -436  | 26228 | AN6685 |
| 1787 | CONTIG111 | 47704 | 47993 | 1.46 | 1.30E-02 | transcription_start_site | - | 46207 | 46207 | -1641 | 26229 | AN6685 |
| 1787 | CONTIG111 | 47704 | 47993 | 1.46 | 1.30E-02 | transcription_start_site | - | 43904 | 43904 | -3944 | 26230 | AN6685 |
| 1787 | CONTIG111 | 47704 | 47993 | 1.46 | 1.30E-02 | transcription_start_site | + | 49707 | 49707 | -1858 | 26231 | AN6686 |
| 1787 | CONTIG111 | 47704 | 47993 | 1.46 | 1.30E-02 | transcription_start_site | + | 50017 | 50017 | -2168 | 26232 | AN6686 |
| 1787 | CONTIG111 | 47704 | 47993 | 1.46 | 1.30E-02 | transcription_start_site | + | 51349 | 51349 | -3500 | 26233 | AN6687 |
| 1787 | CONTIG111 | 47704 | 47993 | 1.46 | 1.30E-02 | transcription_start_site | + | 51403 | 51403 | -3554 | 26234 | AN6687 |
| 1787 | CONTIG111 | 47704 | 47993 | 1.46 | 1.30E-02 | transcription_start_site | + | 51683 | 51683 | -3834 | 26235 | AN6687 |
| 1787 | CONTIG111 | 47704 | 47993 | 1.46 | 1.30E-02 | transcription_start_site | + | 52256 | 52256 | -4407 | 26236 | AN6687 |
| 1787 | CONTIG111 | 47704 | 47993 | 1.46 | 1.30E-02 | transcription_start_site | + | 52545 | 52545 | -4696 | 26237 | AN6687 |
| 1787 | CONTIG111 | 47704 | 47993 | 1.46 | 1.30E-02 | transcription_start_site | + | 52725 | 52725 | -4876 | 26238 | AN6687 |
| 2947 | CONTIG111 | 58439 | 58714 | 0.97 | 1.25E-01 | transcription_start_site | + | 58809 | 58809 | -232  | 26245 | AN6689 |
| 2947 | CONTIG111 | 58439 | 58714 | 0.97 | 1.25E-01 | transcription_start_site | + | 58935 | 58935 | -358  | 26246 | AN6689 |
| 2947 | CONTIG111 | 58439 | 58714 | 0.97 | 1.25E-01 | transcription_start_site | + | 59134 | 59134 | -557  | 26247 | AN6689 |
| 2947 | CONTIG111 | 58439 | 58714 | 0.97 | 1.25E-01 | transcription_start_site | + | 59418 | 59418 | -841  | 26248 | AN6689 |
| 2947 | CONTIG111 | 58439 | 58714 | 0.97 | 1.25E-01 | transcription_start_site | + | 61149 | 61149 | -2572 | 26249 | AN6690 |
| 2947 | CONTIG111 | 58439 | 58714 | 0.97 | 1.25E-01 | transcription_start_site | + | 61204 | 61204 | -2627 | 26250 | AN6690 |
| 2947 | CONTIG111 | 58439 | 58714 | 0.97 | 1.25E-01 | transcription_start_site | + | 61501 | 61501 | -2924 | 26251 | AN6690 |
| 2784 | CONTIG112 | 10577 | 11376 | 1.08 | 1.50E-01 | transcription_start_site | + | 9714  | 9714  | 1262  | 26272 | AN6694 |
| 360  | CONTIG112 | 24003 | 24502 | 2.66 | 0.00E+00 | transcription_start_site | - | 20408 | 20408 | -3844 | 26281 | AN6696 |
| 360  | CONTIG112 | 24003 | 24502 | 2.66 | 0.00E+00 | transcription_start_site | - | 23347 | 23347 | -905  | 26283 | AN6697 |
| 360  | CONTIG112 | 24003 | 24502 | 2.66 | 0.00E+00 | transcription_start_site | - | 22479 | 22479 | -1773 | 26284 | AN6697 |
| 360  | CONTIG112 | 24003 | 24502 | 2.66 | 0.00E+00 | transcription_start_site | - | 22048 | 22048 | -2204 | 26285 | AN6697 |
| 360  | CONTIG112 | 24003 | 24502 | 2.66 | 0.00E+00 | transcription_start_site | + | 26930 | 26930 | -2677 | 26286 | AN6698 |
| 360  | CONTIG112 | 24003 | 24502 | 2.66 | 0.00E+00 | transcription_start_site | + | 27057 | 27057 | -2804 | 26287 | AN6698 |
| 360  | CONTIG112 | 24003 | 24502 | 2.66 | 0.00E+00 | transcription_start_site | + | 28588 | 28588 | -4335 | 26288 | AN6699 |

|      |           |       |       |      |          |                          |   |       |       |       |       |        |
|------|-----------|-------|-------|------|----------|--------------------------|---|-------|-------|-------|-------|--------|
| 360  | CONTIG112 | 24003 | 24502 | 2.66 | 0.00E+00 | transcription_start_site | + | 28944 | 28944 | -4691 | 26289 | AN6699 |
| 360  | CONTIG112 | 24003 | 24502 | 2.66 | 0.00E+00 | transcription_start_site | + | 29167 | 29167 | -4914 | 26290 | AN6699 |
| 740  | CONTIG112 | 35869 | 36295 | 2.16 | 0.00E+00 | transcription_start_site | - | 35825 | 35825 | -257  | 26291 | AN6700 |
| 816  | CONTIG112 | 36829 | 39152 | 2.08 | 0.00E+00 | transcription_start_site | - | 35825 | 35825 | -2165 | 26291 | AN6700 |
| 2479 | CONTIG112 | 34879 | 35458 | 1.21 | 1.08E-01 | transcription_start_site | - | 35825 | 35825 | 656   | 26291 | AN6700 |
| 2710 | CONTIG112 | 39845 | 40189 | 1.12 | 1.44E-01 | transcription_start_site | - | 35825 | 35825 | -4192 | 26291 | AN6700 |
| 816  | CONTIG112 | 36829 | 39152 | 2.08 | 0.00E+00 | transcription_start_site | - | 39369 | 39369 | 1378  | 26295 | AN6701 |
| 816  | CONTIG112 | 36829 | 39152 | 2.08 | 0.00E+00 | transcription_start_site | - | 39493 | 39493 | 1502  | 26294 | AN6701 |
| 816  | CONTIG112 | 36829 | 39152 | 2.08 | 0.00E+00 | transcription_start_site | - | 39931 | 39931 | 1940  | 26293 | AN6701 |
| 2710 | CONTIG112 | 39845 | 40189 | 1.12 | 1.44E-01 | transcription_start_site | - | 39931 | 39931 | -86   | 26293 | AN6701 |
| 2710 | CONTIG112 | 39845 | 40189 | 1.12 | 1.44E-01 | transcription_start_site | - | 40163 | 40163 | 146   | 26292 | AN6701 |
| 2710 | CONTIG112 | 39845 | 40189 | 1.12 | 1.44E-01 | transcription_start_site | - | 39493 | 39493 | -524  | 26294 | AN6701 |
| 2710 | CONTIG112 | 39845 | 40189 | 1.12 | 1.44E-01 | transcription_start_site | - | 39369 | 39369 | -648  | 26295 | AN6701 |
| 816  | CONTIG112 | 36829 | 39152 | 2.08 | 0.00E+00 | transcription_start_site | + | 42225 | 42225 | -4234 | 26296 | AN6702 |
| 816  | CONTIG112 | 36829 | 39152 | 2.08 | 0.00E+00 | transcription_start_site | + | 42382 | 42382 | -4391 | 26297 | AN6702 |
| 816  | CONTIG112 | 36829 | 39152 | 2.08 | 0.00E+00 | transcription_start_site | + | 42642 | 42642 | -4651 | 26298 | AN6702 |
| 816  | CONTIG112 | 36829 | 39152 | 2.08 | 0.00E+00 | transcription_start_site | + | 42727 | 42727 | -4736 | 26299 | AN6702 |
| 816  | CONTIG112 | 36829 | 39152 | 2.08 | 0.00E+00 | transcription_start_site | + | 43193 | 43193 | -5202 | 26300 | AN6702 |
| 816  | CONTIG112 | 36829 | 39152 | 2.08 | 0.00E+00 | transcription_start_site | + | 43848 | 43848 | -5857 | 26301 | AN6702 |
| 2217 | CONTIG112 | 47271 | 47771 | 1.29 | 8.01E-02 | transcription_start_site | + | 46641 | 46641 | 880   | 26305 | AN6702 |
| 2217 | CONTIG112 | 47271 | 47771 | 1.29 | 8.01E-02 | transcription_start_site | + | 46366 | 46366 | 1155  | 26304 | AN6702 |
| 2710 | CONTIG112 | 39845 | 40189 | 1.12 | 1.44E-01 | transcription_start_site | + | 42225 | 42225 | -2208 | 26296 | AN6702 |
| 2710 | CONTIG112 | 39845 | 40189 | 1.12 | 1.44E-01 | transcription_start_site | + | 42382 | 42382 | -2365 | 26297 | AN6702 |
| 2710 | CONTIG112 | 39845 | 40189 | 1.12 | 1.44E-01 | transcription_start_site | + | 42642 | 42642 | -2625 | 26298 | AN6702 |
| 2710 | CONTIG112 | 39845 | 40189 | 1.12 | 1.44E-01 | transcription_start_site | + | 42727 | 42727 | -2710 | 26299 | AN6702 |
| 2710 | CONTIG112 | 39845 | 40189 | 1.12 | 1.44E-01 | transcription_start_site | + | 43193 | 43193 | -3176 | 26300 | AN6702 |
| 2710 | CONTIG112 | 39845 | 40189 | 1.12 | 1.44E-01 | transcription_start_site | + | 43848 | 43848 | -3831 | 26301 | AN6702 |
| 2710 | CONTIG112 | 39845 | 40189 | 1.12 | 1.44E-01 | transcription_start_site | + | 44748 | 44748 | -4731 | 26302 | AN6702 |
| 2217 | CONTIG112 | 47271 | 47771 | 1.29 | 8.01E-02 | transcription_start_site | + | 48095 | 48095 | -574  | 26306 | AN6703 |
| 2217 | CONTIG112 | 47271 | 47771 | 1.29 | 8.01E-02 | transcription_start_site | + | 48342 | 48342 | -821  | 26307 | AN6703 |
| 2217 | CONTIG112 | 47271 | 47771 | 1.29 | 8.01E-02 | transcription_start_site | + | 49073 | 49073 | -1552 | 26308 | AN6703 |
| 2217 | CONTIG112 | 47271 | 47771 | 1.29 | 8.01E-02 | transcription_start_site | + | 51069 | 51069 | -3548 | 26309 | AN6704 |
| 2217 | CONTIG112 | 47271 | 47771 | 1.29 | 8.01E-02 | transcription_start_site | + | 51781 | 51781 | -4260 | 26310 | AN6704 |
| 2217 | CONTIG112 | 47271 | 47771 | 1.29 | 8.01E-02 | transcription_start_site | + | 52514 | 52514 | -4993 | 26311 | AN6705 |
| 2217 | CONTIG112 | 47271 | 47771 | 1.29 | 8.01E-02 | transcription_start_site | + | 52761 | 52761 | -5240 | 26312 | AN6705 |
| 1898 | CONTIG112 | 84826 | 85418 | 1.41 | 5.22E-02 | transcription_start_site | - | 81639 | 81639 | -3483 | 26336 | AN6712 |
| 1898 | CONTIG112 | 84826 | 85418 | 1.41 | 5.22E-02 | transcription_start_site | - | 81543 | 81543 | -3579 | 26337 | AN6712 |
| 1898 | CONTIG112 | 84826 | 85418 | 1.41 | 5.22E-02 | transcription_start_site | - | 81103 | 81103 | -4019 | 26338 | AN6712 |
| 1898 | CONTIG112 | 84826 | 85418 | 1.41 | 5.22E-02 | transcription_start_site | - | 80897 | 80897 | -4225 | 26339 | AN6712 |
| 1898 | CONTIG112 | 84826 | 85418 | 1.41 | 5.22E-02 | transcription_start_site | - | 80222 | 80222 | -4900 | 26340 | AN6712 |
| 1898 | CONTIG112 | 84826 | 85418 | 1.41 | 5.22E-02 | transcription_start_site | - | 79914 | 79914 | -5208 | 26341 | AN6712 |
| 2612 | CONTIG112 | 81621 | 81950 | 1.16 | 1.25E-01 | transcription_start_site | - | 81639 | 81639 | -146  | 26336 | AN6712 |
| 2612 | CONTIG112 | 81621 | 81950 | 1.16 | 1.25E-01 | transcription_start_site | - | 81543 | 81543 | -242  | 26337 | AN6712 |
| 2612 | CONTIG112 | 81621 | 81950 | 1.16 | 1.25E-01 | transcription_start_site | - | 81103 | 81103 | -682  | 26338 | AN6712 |
| 2612 | CONTIG112 | 81621 | 81950 | 1.16 | 1.25E-01 | transcription_start_site | - | 80897 | 80897 | -888  | 26339 | AN6712 |
| 2612 | CONTIG112 | 81621 | 81950 | 1.16 | 1.25E-01 | transcription_start_site | - | 80222 | 80222 | -1563 | 26340 | AN6712 |
| 2612 | CONTIG112 | 81621 | 81950 | 1.16 | 1.25E-01 | transcription_start_site | - | 79914 | 79914 | -1871 | 26341 | AN6712 |
| 2612 | CONTIG112 | 81621 | 81950 | 1.16 | 1.25E-01 | transcription_start_site | - | 79401 | 79401 | -2384 | 26342 | AN6712 |
| 2612 | CONTIG112 | 81621 | 81950 | 1.16 | 1.25E-01 | transcription_start_site | - | 78785 | 78785 | -3000 | 26343 | AN6712 |
| 2612 | CONTIG112 | 81621 | 81950 | 1.16 | 1.25E-01 | transcription_start_site | + | 82082 | 82082 | -296  | 26344 | AN6713 |
| 2612 | CONTIG112 | 81621 | 81950 | 1.16 | 1.25E-01 | transcription_start_site | + | 82311 | 82311 | -525  | 26345 | AN6713 |
| 2612 | CONTIG112 | 81621 | 81950 | 1.16 | 1.25E-01 | transcription_start_site | + | 82439 | 82439 | -653  | 26346 | AN6713 |
| 2612 | CONTIG112 | 81621 | 81950 | 1.16 | 1.25E-01 | transcription_start_site | + | 82531 | 82531 | -745  | 26347 | AN6713 |
| 2612 | CONTIG112 | 81621 | 81950 | 1.16 | 1.25E-01 | transcription_start_site | + | 82714 | 82714 | -928  | 26348 | AN6713 |
| 2612 | CONTIG112 | 81621 | 81950 | 1.16 | 1.25E-01 | transcription_start_site | + | 82892 | 82892 | -1106 | 26349 | AN6713 |
| 2612 | CONTIG112 | 81621 | 81950 | 1.16 | 1.25E-01 | transcription_start_site | + | 83038 | 83038 | -1252 | 26350 | AN6713 |
| 2612 | CONTIG112 | 81621 | 81950 | 1.16 | 1.25E-01 | transcription_start_site | + | 83362 | 83362 | -1576 | 26351 | AN6713 |

|      |           |        |        |      |          |                          |   |        |        |       |       |        |
|------|-----------|--------|--------|------|----------|--------------------------|---|--------|--------|-------|-------|--------|
| 1592 | CONTIG112 | 93239  | 93510  | 1.54 | 3.08E-02 | transcription_start_site | - | 91212  | 91212  | -2162 | 26353 | AN6715 |
| 1592 | CONTIG112 | 93239  | 93510  | 1.54 | 3.08E-02 | transcription_start_site | - | 90833  | 90833  | -2541 | 26354 | AN6715 |
| 1592 | CONTIG112 | 93239  | 93510  | 1.54 | 3.08E-02 | transcription_start_site | - | 89109  | 89109  | -4265 | 26355 | AN6715 |
| 1592 | CONTIG112 | 93239  | 93510  | 1.54 | 3.08E-02 | transcription_start_site | + | 96200  | 96200  | -2825 | 26358 | AN6717 |
| 1592 | CONTIG112 | 93239  | 93510  | 1.54 | 3.08E-02 | transcription_start_site | + | 96363  | 96363  | -2988 | 26359 | AN6717 |
| 1592 | CONTIG112 | 93239  | 93510  | 1.54 | 3.08E-02 | transcription_start_site | + | 96544  | 96544  | -3169 | 26360 | AN6717 |
| 1592 | CONTIG112 | 93239  | 93510  | 1.54 | 3.08E-02 | transcription_start_site | + | 96748  | 96748  | -3373 | 26361 | AN6717 |
| 1592 | CONTIG112 | 93239  | 93510  | 1.54 | 3.08E-02 | transcription_start_site | + | 96893  | 96893  | -3518 | 26362 | AN6717 |
| 2856 | CONTIG112 | 96914  | 97253  | 1.04 | 1.93E-01 | transcription_start_site | + | 96893  | 96893  | 190   | 26362 | AN6717 |
| 2856 | CONTIG112 | 96914  | 97253  | 1.04 | 1.93E-01 | transcription_start_site | + | 96748  | 96748  | 335   | 26361 | AN6717 |
| 2856 | CONTIG112 | 96914  | 97253  | 1.04 | 1.93E-01 | transcription_start_site | + | 96544  | 96544  | 539   | 26360 | AN6717 |
| 2856 | CONTIG112 | 96914  | 97253  | 1.04 | 1.93E-01 | transcription_start_site | + | 96363  | 96363  | 720   | 26359 | AN6717 |
| 2856 | CONTIG112 | 96914  | 97253  | 1.04 | 1.93E-01 | transcription_start_site | + | 96200  | 96200  | 883   | 26358 | AN6717 |
| 2853 | CONTIG112 | 114396 | 114875 | 1.04 | 1.79E-01 | transcription_start_site | + | 115290 | 115290 | -654  | 26369 | AN6721 |
| 499  | CONTIG112 | 140265 | 140555 | 2.45 | 6.10E-04 | transcription_start_site | - | 135546 | 135546 | -4864 | 26384 | AN6728 |
| 499  | CONTIG112 | 140265 | 140555 | 2.45 | 6.10E-04 | transcription_start_site | - | 135456 | 135456 | -4954 | 26385 | AN6728 |
| 499  | CONTIG112 | 140265 | 140555 | 2.45 | 6.10E-04 | transcription_start_site | - | 139413 | 139413 | -997  | 26390 | AN6730 |
| 499  | CONTIG112 | 140265 | 140555 | 2.45 | 6.10E-04 | transcription_start_site | - | 139108 | 139108 | -1302 | 26391 | AN6730 |
| 1999 | CONTIG112 | 140937 | 141366 | 1.37 | 5.88E-02 | transcription_start_site | - | 139413 | 139413 | -1738 | 26390 | AN6730 |
| 1999 | CONTIG112 | 140937 | 141366 | 1.37 | 5.88E-02 | transcription_start_site | - | 139108 | 139108 | -2043 | 26391 | AN6730 |
| 2351 | CONTIG112 | 144237 | 144582 | 1.25 | 7.51E-02 | transcription_start_site | - | 139413 | 139413 | -4996 | 26390 | AN6730 |
| 2711 | CONTIG112 | 141612 | 142111 | 1.12 | 1.44E-01 | transcription_start_site | - | 139413 | 139413 | -2448 | 26390 | AN6730 |
| 2711 | CONTIG112 | 141612 | 142111 | 1.12 | 1.44E-01 | transcription_start_site | - | 139108 | 139108 | -2753 | 26391 | AN6730 |
| 499  | CONTIG112 | 140265 | 140555 | 2.45 | 6.10E-04 | transcription_start_site | + | 140769 | 140769 | -359  | 26392 | AN6731 |
| 499  | CONTIG112 | 140265 | 140555 | 2.45 | 6.10E-04 | transcription_start_site | + | 141059 | 141059 | -649  | 26393 | AN6731 |
| 1999 | CONTIG112 | 140937 | 141366 | 1.37 | 5.88E-02 | transcription_start_site | + | 141059 | 141059 | 92    | 26393 | AN6731 |
| 1999 | CONTIG112 | 140937 | 141366 | 1.37 | 5.88E-02 | transcription_start_site | + | 140769 | 140769 | 382   | 26392 | AN6731 |
| 2711 | CONTIG112 | 141612 | 142111 | 1.12 | 1.44E-01 | transcription_start_site | + | 141059 | 141059 | 802   | 26393 | AN6731 |
| 2711 | CONTIG112 | 141612 | 142111 | 1.12 | 1.44E-01 | transcription_start_site | + | 140769 | 140769 | 1092  | 26392 | AN6731 |
| 648  | CONTIG112 | 145219 | 145553 | 2.24 | 1.22E-03 | transcription_start_site | - | 145218 | 145218 | -168  | 26395 | AN6732 |
| 648  | CONTIG112 | 145219 | 145553 | 2.24 | 1.22E-03 | transcription_start_site | - | 145594 | 145594 | 208   | 26394 | AN6732 |
| 648  | CONTIG112 | 145219 | 145553 | 2.24 | 1.22E-03 | transcription_start_site | - | 144829 | 144829 | -557  | 26396 | AN6732 |
| 1994 | CONTIG112 | 148889 | 149765 | 1.37 | 3.99E-02 | transcription_start_site | - | 145594 | 145594 | -3733 | 26394 | AN6732 |
| 1994 | CONTIG112 | 148889 | 149765 | 1.37 | 3.99E-02 | transcription_start_site | - | 145218 | 145218 | -4109 | 26395 | AN6732 |
| 1994 | CONTIG112 | 148889 | 149765 | 1.37 | 3.99E-02 | transcription_start_site | - | 144829 | 144829 | -4498 | 26396 | AN6732 |
| 2351 | CONTIG112 | 144237 | 144582 | 1.25 | 7.51E-02 | transcription_start_site | - | 144829 | 144829 | 419   | 26396 | AN6732 |
| 2351 | CONTIG112 | 144237 | 144582 | 1.25 | 7.51E-02 | transcription_start_site | - | 145218 | 145218 | 808   | 26395 | AN6732 |
| 2785 | CONTIG112 | 146254 | 147203 | 1.08 | 1.66E-01 | transcription_start_site | - | 145594 | 145594 | -1134 | 26394 | AN6732 |
| 2785 | CONTIG112 | 146254 | 147203 | 1.08 | 1.66E-01 | transcription_start_site | - | 145218 | 145218 | -1510 | 26395 | AN6732 |
| 2785 | CONTIG112 | 146254 | 147203 | 1.08 | 1.66E-01 | transcription_start_site | - | 144829 | 144829 | -1899 | 26396 | AN6732 |
| 1994 | CONTIG112 | 148889 | 149765 | 1.37 | 3.99E-02 | transcription_start_site | - | 149146 | 149146 | -181  | 26397 | AN6733 |
| 1994 | CONTIG112 | 148889 | 149765 | 1.37 | 3.99E-02 | transcription_start_site | - | 148867 | 148867 | -460  | 26398 | AN6733 |
| 2000 | CONTIG112 | 186830 | 187184 | 1.37 | 5.88E-02 | transcription_start_site | - | 183237 | 183237 | -3770 | 26438 | AN6744 |
| 2000 | CONTIG112 | 186830 | 187184 | 1.37 | 5.88E-02 | transcription_start_site | - | 182902 | 182902 | -4105 | 26439 | AN6744 |
| 2000 | CONTIG112 | 186830 | 187184 | 1.37 | 5.88E-02 | transcription_start_site | - | 186487 | 186487 | -520  | 26443 | AN6746 |
| 2000 | CONTIG112 | 186830 | 187184 | 1.37 | 5.88E-02 | transcription_start_site | - | 186429 | 186429 | -578  | 26444 | AN6746 |
| 2000 | CONTIG112 | 186830 | 187184 | 1.37 | 5.88E-02 | transcription_start_site | - | 186257 | 186257 | -750  | 26445 | AN6746 |
| 2000 | CONTIG112 | 186830 | 187184 | 1.37 | 5.88E-02 | transcription_start_site | + | 187096 | 187096 | -89   | 26446 | AN6747 |
| 2000 | CONTIG112 | 186830 | 187184 | 1.37 | 5.88E-02 | transcription_start_site | + | 187244 | 187244 | -237  | 26447 | AN6747 |
| 2000 | CONTIG112 | 186830 | 187184 | 1.37 | 5.88E-02 | transcription_start_site | + | 187658 | 187658 | -651  | 26448 | AN6747 |
| 2000 | CONTIG112 | 186830 | 187184 | 1.37 | 5.88E-02 | transcription_start_site | + | 188726 | 188726 | -1719 | 26449 | AN6747 |
| 2000 | CONTIG112 | 186830 | 187184 | 1.37 | 5.88E-02 | transcription_start_site | + | 188935 | 188935 | -1928 | 26450 | AN6747 |
| 2000 | CONTIG112 | 186830 | 187184 | 1.37 | 5.88E-02 | transcription_start_site | + | 189113 | 189113 | -2106 | 26451 | AN6747 |
| 2000 | CONTIG112 | 186830 | 187184 | 1.37 | 5.88E-02 | transcription_start_site | + | 191138 | 191138 | -4131 | 26452 | AN6748 |
| 2000 | CONTIG112 | 186830 | 187184 | 1.37 | 5.88E-02 | transcription_start_site | + | 191664 | 191664 | -4657 | 26453 | AN6748 |
| 521  | CONTIG112 | 199820 | 200689 | 2.41 | 0.00E+00 | transcription_start_site | - | 195124 | 195124 | -5130 | 26454 | AN6749 |
| 691  | CONTIG112 | 194710 | 195364 | 2.2  | 0.00E+00 | transcription_start_site | - | 195124 | 195124 | 87    | 26454 | AN6749 |

|      |           |        |        |      |          |                          |   |        |        |       |       |        |
|------|-----------|--------|--------|------|----------|--------------------------|---|--------|--------|-------|-------|--------|
| 691  | CONTIG112 | 194710 | 195364 | 2.2  | 0.00E+00 | transcription_start_site | - | 194760 | 194760 | -277  | 26455 | AN6749 |
| 691  | CONTIG112 | 194710 | 195364 | 2.2  | 0.00E+00 | transcription_start_site | - | 194658 | 194658 | -379  | 26456 | AN6749 |
| 691  | CONTIG112 | 194710 | 195364 | 2.2  | 0.00E+00 | transcription_start_site | - | 194157 | 194157 | -880  | 26457 | AN6749 |
| 691  | CONTIG112 | 194710 | 195364 | 2.2  | 0.00E+00 | transcription_start_site | - | 194079 | 194079 | -958  | 26458 | AN6749 |
| 773  | CONTIG112 | 193055 | 193404 | 2.12 | 2.22E-03 | transcription_start_site | - | 194079 | 194079 | 849   | 26458 | AN6749 |
| 773  | CONTIG112 | 193055 | 193404 | 2.12 | 2.22E-03 | transcription_start_site | - | 194157 | 194157 | 927   | 26457 | AN6749 |
| 2712 | CONTIG112 | 193580 | 194154 | 1.12 | 1.44E-01 | transcription_start_site | - | 194079 | 194079 | 212   | 26458 | AN6749 |
| 2712 | CONTIG112 | 193580 | 194154 | 1.12 | 1.44E-01 | transcription_start_site | - | 194157 | 194157 | 290   | 26457 | AN6749 |
| 2712 | CONTIG112 | 193580 | 194154 | 1.12 | 1.44E-01 | transcription_start_site | - | 194658 | 194658 | 791   | 26456 | AN6749 |
| 2712 | CONTIG112 | 193580 | 194154 | 1.12 | 1.44E-01 | transcription_start_site | - | 194760 | 194760 | 893   | 26455 | AN6749 |
| 2712 | CONTIG112 | 193580 | 194154 | 1.12 | 1.44E-01 | transcription_start_site | - | 195124 | 195124 | 1257  | 26454 | AN6749 |
| 2786 | CONTIG112 | 196595 | 197009 | 1.08 | 1.66E-01 | transcription_start_site | - | 195124 | 195124 | -1678 | 26454 | AN6749 |
| 2786 | CONTIG112 | 196595 | 197009 | 1.08 | 1.66E-01 | transcription_start_site | - | 194760 | 194760 | -2042 | 26455 | AN6749 |
| 2786 | CONTIG112 | 196595 | 197009 | 1.08 | 1.66E-01 | transcription_start_site | - | 194658 | 194658 | -2144 | 26456 | AN6749 |
| 2786 | CONTIG112 | 196595 | 197009 | 1.08 | 1.66E-01 | transcription_start_site | - | 194157 | 194157 | -2645 | 26457 | AN6749 |
| 2786 | CONTIG112 | 196595 | 197009 | 1.08 | 1.66E-01 | transcription_start_site | - | 194079 | 194079 | -2723 | 26458 | AN6749 |
| 691  | CONTIG112 | 194710 | 195364 | 2.2  | 0.00E+00 | transcription_start_site | + | 195914 | 195914 | -877  | 26459 | AN6750 |
| 691  | CONTIG112 | 194710 | 195364 | 2.2  | 0.00E+00 | transcription_start_site | + | 196081 | 196081 | -1044 | 26460 | AN6750 |
| 691  | CONTIG112 | 194710 | 195364 | 2.2  | 0.00E+00 | transcription_start_site | + | 196186 | 196186 | -1149 | 26461 | AN6750 |
| 773  | CONTIG112 | 193055 | 193404 | 2.12 | 2.22E-03 | transcription_start_site | + | 195914 | 195914 | -2684 | 26459 | AN6750 |
| 773  | CONTIG112 | 193055 | 193404 | 2.12 | 2.22E-03 | transcription_start_site | + | 196081 | 196081 | -2851 | 26460 | AN6750 |
| 773  | CONTIG112 | 193055 | 193404 | 2.12 | 2.22E-03 | transcription_start_site | + | 196186 | 196186 | -2956 | 26461 | AN6750 |
| 2712 | CONTIG112 | 193580 | 194154 | 1.12 | 1.44E-01 | transcription_start_site | + | 195914 | 195914 | -2047 | 26459 | AN6750 |
| 2712 | CONTIG112 | 193580 | 194154 | 1.12 | 1.44E-01 | transcription_start_site | + | 196081 | 196081 | -2214 | 26460 | AN6750 |
| 2712 | CONTIG112 | 193580 | 194154 | 1.12 | 1.44E-01 | transcription_start_site | + | 196186 | 196186 | -2319 | 26461 | AN6750 |
| 2786 | CONTIG112 | 196595 | 197009 | 1.08 | 1.66E-01 | transcription_start_site | + | 196186 | 196186 | 616   | 26461 | AN6750 |
| 2786 | CONTIG112 | 196595 | 197009 | 1.08 | 1.66E-01 | transcription_start_site | + | 196081 | 196081 | 721   | 26460 | AN6750 |
| 2786 | CONTIG112 | 196595 | 197009 | 1.08 | 1.66E-01 | transcription_start_site | + | 195914 | 195914 | 888   | 26459 | AN6750 |
| 521  | CONTIG112 | 199820 | 200689 | 2.41 | 0.00E+00 | transcription_start_site | - | 199642 | 199642 | -612  | 26462 | AN6751 |
| 521  | CONTIG112 | 199820 | 200689 | 2.41 | 0.00E+00 | transcription_start_site | - | 199157 | 199157 | -1097 | 26463 | AN6751 |
| 521  | CONTIG112 | 199820 | 200689 | 2.41 | 0.00E+00 | transcription_start_site | - | 198596 | 198596 | -1658 | 26464 | AN6751 |
| 1209 | CONTIG112 | 203330 | 203984 | 1.75 | 5.41E-03 | transcription_start_site | - | 199642 | 199642 | -4015 | 26462 | AN6751 |
| 1209 | CONTIG112 | 203330 | 203984 | 1.75 | 5.41E-03 | transcription_start_site | - | 199157 | 199157 | -4500 | 26463 | AN6751 |
| 1209 | CONTIG112 | 203330 | 203984 | 1.75 | 5.41E-03 | transcription_start_site | - | 198596 | 198596 | -5061 | 26464 | AN6751 |
| 2709 | CONTIG112 | 201615 | 202479 | 1.12 | 1.28E-01 | transcription_start_site | - | 199642 | 199642 | -2405 | 26462 | AN6751 |
| 2709 | CONTIG112 | 201615 | 202479 | 1.12 | 1.28E-01 | transcription_start_site | - | 199157 | 199157 | -2890 | 26463 | AN6751 |
| 2709 | CONTIG112 | 201615 | 202479 | 1.12 | 1.28E-01 | transcription_start_site | - | 198596 | 198596 | -3451 | 26464 | AN6751 |
| 521  | CONTIG112 | 199820 | 200689 | 2.41 | 0.00E+00 | transcription_start_site | + | 200869 | 200869 | -614  | 26465 | AN6752 |
| 521  | CONTIG112 | 199820 | 200689 | 2.41 | 0.00E+00 | transcription_start_site | + | 201308 | 201308 | -1053 | 26466 | AN6752 |
| 521  | CONTIG112 | 199820 | 200689 | 2.41 | 0.00E+00 | transcription_start_site | + | 201728 | 201728 | -1473 | 26467 | AN6752 |
| 521  | CONTIG112 | 199820 | 200689 | 2.41 | 0.00E+00 | transcription_start_site | + | 202443 | 202443 | -2188 | 26468 | AN6752 |
| 1209 | CONTIG112 | 203330 | 203984 | 1.75 | 5.41E-03 | transcription_start_site | + | 202443 | 202443 | 1214  | 26468 | AN6752 |
| 2709 | CONTIG112 | 201615 | 202479 | 1.12 | 1.28E-01 | transcription_start_site | + | 201728 | 201728 | 319   | 26467 | AN6752 |
| 2709 | CONTIG112 | 201615 | 202479 | 1.12 | 1.28E-01 | transcription_start_site | + | 202443 | 202443 | -396  | 26468 | AN6752 |
| 2709 | CONTIG112 | 201615 | 202479 | 1.12 | 1.28E-01 | transcription_start_site | + | 201308 | 201308 | 739   | 26466 | AN6752 |
| 2709 | CONTIG112 | 201615 | 202479 | 1.12 | 1.28E-01 | transcription_start_site | + | 200869 | 200869 | 1178  | 26465 | AN6752 |
| 2786 | CONTIG112 | 196595 | 197009 | 1.08 | 1.66E-01 | transcription_start_site | + | 200869 | 200869 | -4067 | 26465 | AN6752 |
| 2786 | CONTIG112 | 196595 | 197009 | 1.08 | 1.66E-01 | transcription_start_site | + | 201308 | 201308 | -4506 | 26466 | AN6752 |
| 2786 | CONTIG112 | 196595 | 197009 | 1.08 | 1.66E-01 | transcription_start_site | + | 201728 | 201728 | -4926 | 26467 | AN6752 |
| 521  | CONTIG112 | 199820 | 200689 | 2.41 | 0.00E+00 | transcription_start_site | + | 203890 | 203890 | -3635 | 26469 | AN6753 |
| 1209 | CONTIG112 | 203330 | 203984 | 1.75 | 5.41E-03 | transcription_start_site | + | 203890 | 203890 | -233  | 26469 | AN6753 |
| 2709 | CONTIG112 | 201615 | 202479 | 1.12 | 1.28E-01 | transcription_start_site | + | 203890 | 203890 | -1843 | 26469 | AN6753 |
| 1209 | CONTIG112 | 203330 | 203984 | 1.75 | 5.41E-03 | transcription_start_site | + | 207589 | 207589 | -3932 | 26470 | AN6754 |
| 1209 | CONTIG112 | 203330 | 203984 | 1.75 | 5.41E-03 | transcription_start_site | + | 207772 | 207772 | -4115 | 26471 | AN6754 |
| 1209 | CONTIG112 | 203330 | 203984 | 1.75 | 5.41E-03 | transcription_start_site | + | 207981 | 207981 | -4324 | 26472 | AN6754 |
| 1422 | CONTIG112 | 207240 | 207596 | 1.62 | 2.12E-02 | transcription_start_site | + | 207589 | 207589 | -171  | 26470 | AN6754 |
| 1422 | CONTIG112 | 207240 | 207596 | 1.62 | 2.12E-02 | transcription_start_site | + | 207772 | 207772 | -354  | 26471 | AN6754 |

|      |           |        |        |      |          |                          |   |        |        |       |       |        |
|------|-----------|--------|--------|------|----------|--------------------------|---|--------|--------|-------|-------|--------|
| 1422 | CONTIG112 | 207240 | 207596 | 1.62 | 2.12E-02 | transcription_start_site | + | 207981 | 207981 | -563  | 26472 | AN6754 |
| 2105 | CONTIG112 | 208960 | 209304 | 1.33 | 5.05E-02 | transcription_start_site | + | 207981 | 207981 | 1151  | 26472 | AN6754 |
| 2105 | CONTIG112 | 208960 | 209304 | 1.33 | 5.05E-02 | transcription_start_site | - | 210287 | 210287 | 1155  | 26477 | AN6755 |
| 2787 | CONTIG112 | 209855 | 210134 | 1.08 | 1.66E-01 | transcription_start_site | - | 210287 | 210287 | 292   | 26477 | AN6755 |
| 2787 | CONTIG112 | 209855 | 210134 | 1.08 | 1.66E-01 | transcription_start_site | - | 210402 | 210402 | 407   | 26476 | AN6755 |
| 2787 | CONTIG112 | 209855 | 210134 | 1.08 | 1.66E-01 | transcription_start_site | - | 210470 | 210470 | 475   | 26475 | AN6755 |
| 2787 | CONTIG112 | 209855 | 210134 | 1.08 | 1.66E-01 | transcription_start_site | - | 210716 | 210716 | 721   | 26474 | AN6755 |
| 2787 | CONTIG112 | 209855 | 210134 | 1.08 | 1.66E-01 | transcription_start_site | - | 210891 | 210891 | 896   | 26473 | AN6755 |
| 2001 | CONTIG112 | 225685 | 225954 | 1.37 | 5.88E-02 | transcription_start_site | - | 223171 | 223171 | -2648 | 26502 | AN6760 |
| 2001 | CONTIG112 | 225685 | 225954 | 1.37 | 5.88E-02 | transcription_start_site | - | 225313 | 225313 | -506  | 26503 | AN6761 |
| 2001 | CONTIG112 | 225685 | 225954 | 1.37 | 5.88E-02 | transcription_start_site | - | 224980 | 224980 | -839  | 26504 | AN6761 |
| 2001 | CONTIG112 | 225685 | 225954 | 1.37 | 5.88E-02 | transcription_start_site | - | 223932 | 223932 | -1887 | 26505 | AN6761 |
| 2001 | CONTIG112 | 225685 | 225954 | 1.37 | 5.88E-02 | transcription_start_site | + | 225711 | 225711 | 108   | 26507 | AN6762 |
| 2001 | CONTIG112 | 225685 | 225954 | 1.37 | 5.88E-02 | transcription_start_site | + | 225516 | 225516 | 303   | 26506 | AN6762 |
| 2001 | CONTIG112 | 225685 | 225954 | 1.37 | 5.88E-02 | transcription_start_site | + | 226502 | 226502 | -682  | 26508 | AN6762 |
| 2001 | CONTIG112 | 225685 | 225954 | 1.37 | 5.88E-02 | transcription_start_site | + | 226621 | 226621 | -801  | 26509 | AN6762 |
| 2001 | CONTIG112 | 225685 | 225954 | 1.37 | 5.88E-02 | transcription_start_site | + | 226868 | 226868 | -1048 | 26510 | AN6762 |
| 2001 | CONTIG112 | 225685 | 225954 | 1.37 | 5.88E-02 | transcription_start_site | + | 227304 | 227304 | -1484 | 26511 | AN6762 |
| 2857 | CONTIG112 | 240460 | 240744 | 1.04 | 1.93E-01 | transcription_start_site | - | 238712 | 238712 | -1890 | 26518 | AN6765 |
| 2857 | CONTIG112 | 240460 | 240744 | 1.04 | 1.93E-01 | transcription_start_site | - | 237837 | 237837 | -2765 | 26519 | AN6765 |
| 2857 | CONTIG112 | 240460 | 240744 | 1.04 | 1.93E-01 | transcription_start_site | - | 237397 | 237397 | -3205 | 26520 | AN6765 |
| 2857 | CONTIG112 | 240460 | 240744 | 1.04 | 1.93E-01 | transcription_start_site | - | 236994 | 236994 | -3608 | 26521 | AN6765 |
| 2857 | CONTIG112 | 240460 | 240744 | 1.04 | 1.93E-01 | transcription_start_site | - | 236670 | 236670 | -3932 | 26522 | AN6765 |
| 2857 | CONTIG112 | 240460 | 240744 | 1.04 | 1.93E-01 | transcription_start_site | - | 236474 | 236474 | -4128 | 26523 | AN6765 |
| 2857 | CONTIG112 | 240460 | 240744 | 1.04 | 1.93E-01 | transcription_start_site | - | 241057 | 241057 | 455   | 26528 | AN6767 |
| 2857 | CONTIG112 | 240460 | 240744 | 1.04 | 1.93E-01 | transcription_start_site | - | 241469 | 241469 | 867   | 26527 | AN6767 |
| 2857 | CONTIG112 | 240460 | 240744 | 1.04 | 1.93E-01 | transcription_start_site | + | 242963 | 242963 | -2361 | 26529 | AN6768 |
| 2857 | CONTIG112 | 240460 | 240744 | 1.04 | 1.93E-01 | transcription_start_site | + | 244837 | 244837 | -4235 | 26530 | AN6768 |
| 2857 | CONTIG112 | 240460 | 240744 | 1.04 | 1.93E-01 | transcription_start_site | + | 245109 | 245109 | -4507 | 26531 | AN6768 |
| 2857 | CONTIG112 | 240460 | 240744 | 1.04 | 1.93E-01 | transcription_start_site | + | 245415 | 245415 | -4813 | 26532 | AN6768 |
| 1899 | CONTIG112 | 255689 | 256103 | 1.41 | 5.22E-02 | transcription_start_site | - | 254344 | 254344 | -1552 | 26548 | AN6771 |
| 1899 | CONTIG112 | 255689 | 256103 | 1.41 | 5.22E-02 | transcription_start_site | - | 254058 | 254058 | -1838 | 26549 | AN6771 |
| 1899 | CONTIG112 | 255689 | 256103 | 1.41 | 5.22E-02 | transcription_start_site | - | 253910 | 253910 | -1986 | 26550 | AN6771 |
| 1899 | CONTIG112 | 255689 | 256103 | 1.41 | 5.22E-02 | transcription_start_site | - | 253534 | 253534 | -2362 | 26551 | AN6771 |
| 1899 | CONTIG112 | 255689 | 256103 | 1.41 | 5.22E-02 | transcription_start_site | - | 253366 | 253366 | -2530 | 26552 | AN6771 |
| 1899 | CONTIG112 | 255689 | 256103 | 1.41 | 5.22E-02 | transcription_start_site | - | 252962 | 252962 | -2934 | 26553 | AN6771 |
| 1899 | CONTIG112 | 255689 | 256103 | 1.41 | 5.22E-02 | transcription_start_site | + | 255594 | 255594 | 302   | 26554 | AN6772 |
| 2613 | CONTIG112 | 268664 | 268928 | 1.16 | 1.25E-01 | transcription_start_site | - | 265186 | 265186 | -3610 | 26558 | AN6775 |
| 2613 | CONTIG112 | 268664 | 268928 | 1.16 | 1.25E-01 | transcription_start_site | - | 265094 | 265094 | -3702 | 26559 | AN6775 |
| 2613 | CONTIG112 | 268664 | 268928 | 1.16 | 1.25E-01 | transcription_start_site | - | 264864 | 264864 | -3932 | 26560 | AN6775 |
| 2613 | CONTIG112 | 268664 | 268928 | 1.16 | 1.25E-01 | transcription_start_site | - | 264665 | 264665 | -4131 | 26561 | AN6775 |
| 999  | CONTIG112 | 305476 | 305758 | 1.91 | 6.61E-03 | transcription_start_site | - | 303057 | 303057 | -2560 | 26595 | AN6786 |
| 999  | CONTIG112 | 305476 | 305758 | 1.91 | 6.61E-03 | transcription_start_site | - | 302751 | 302751 | -2866 | 26596 | AN6786 |
| 999  | CONTIG112 | 305476 | 305758 | 1.91 | 6.61E-03 | transcription_start_site | - | 302623 | 302623 | -2994 | 26597 | AN6786 |
| 999  | CONTIG112 | 305476 | 305758 | 1.91 | 6.61E-03 | transcription_start_site | + | 305766 | 305766 | -149  | 26598 | AN6787 |
| 999  | CONTIG112 | 305476 | 305758 | 1.91 | 6.61E-03 | transcription_start_site | + | 307011 | 307011 | -1394 | 26599 | AN6787 |
| 999  | CONTIG112 | 305476 | 305758 | 1.91 | 6.61E-03 | transcription_start_site | + | 307088 | 307088 | -1471 | 26600 | AN6787 |
| 999  | CONTIG112 | 305476 | 305758 | 1.91 | 6.61E-03 | transcription_start_site | + | 307224 | 307224 | -1607 | 26601 | AN6787 |
| 999  | CONTIG112 | 305476 | 305758 | 1.91 | 6.61E-03 | transcription_start_site | + | 307433 | 307433 | -1816 | 26602 | AN6787 |
| 2854 | CONTIG112 | 313068 | 313477 | 1.04 | 1.79E-01 | transcription_start_site | - | 311608 | 311608 | -1664 | 26603 | AN6788 |
| 2854 | CONTIG112 | 313068 | 313477 | 1.04 | 1.79E-01 | transcription_start_site | - | 310951 | 310951 | -2321 | 26604 | AN6788 |
| 2854 | CONTIG112 | 313068 | 313477 | 1.04 | 1.79E-01 | transcription_start_site | - | 310386 | 310386 | -2886 | 26605 | AN6788 |
| 2854 | CONTIG112 | 313068 | 313477 | 1.04 | 1.79E-01 | transcription_start_site | - | 309714 | 309714 | -3558 | 26606 | AN6788 |
| 2854 | CONTIG112 | 313068 | 313477 | 1.04 | 1.79E-01 | transcription_start_site | - | 309542 | 309542 | -3730 | 26607 | AN6788 |
| 2854 | CONTIG112 | 313068 | 313477 | 1.04 | 1.79E-01 | transcription_start_site | - | 309406 | 309406 | -3866 | 26608 | AN6788 |
| 2854 | CONTIG112 | 313068 | 313477 | 1.04 | 1.79E-01 | transcription_start_site | - | 309323 | 309323 | -3949 | 26609 | AN6788 |
| 2854 | CONTIG112 | 313068 | 313477 | 1.04 | 1.79E-01 | transcription_start_site | + | 312623 | 312623 | 649   | 26610 | AN6789 |

|                |        |        |      |          |                          |   |        |        |       |       |        |
|----------------|--------|--------|------|----------|--------------------------|---|--------|--------|-------|-------|--------|
| 1900 CONTIG112 | 318695 | 319179 | 1.41 | 5.22E-02 | transcription_start_site | - | 318265 | 318265 | -672  | 26611 | AN6790 |
| 1900 CONTIG112 | 318695 | 319179 | 1.41 | 5.22E-02 | transcription_start_site | - | 318121 | 318121 | -816  | 26612 | AN6790 |
| 1900 CONTIG112 | 318695 | 319179 | 1.41 | 5.22E-02 | transcription_start_site | - | 317285 | 317285 | -1652 | 26613 | AN6790 |
| 1900 CONTIG112 | 318695 | 319179 | 1.41 | 5.22E-02 | transcription_start_site | - | 316967 | 316967 | -1970 | 26614 | AN6790 |
| 1900 CONTIG112 | 318695 | 319179 | 1.41 | 5.22E-02 | transcription_start_site | + | 320066 | 320066 | -1129 | 26615 | AN6791 |
| 1900 CONTIG112 | 318695 | 319179 | 1.41 | 5.22E-02 | transcription_start_site | + | 320453 | 320453 | -1516 | 26616 | AN6791 |
| 1900 CONTIG112 | 318695 | 319179 | 1.41 | 5.22E-02 | transcription_start_site | + | 320561 | 320561 | -1624 | 26617 | AN6791 |
| 1900 CONTIG112 | 318695 | 319179 | 1.41 | 5.22E-02 | transcription_start_site | + | 320921 | 320921 | -1984 | 26618 | AN6791 |
| 385 CONTIG112  | 351246 | 351580 | 2.62 | 0.00E+00 | transcription_start_site | + | 351537 | 351537 | -124  | 26640 | AN6801 |
| 385 CONTIG112  | 351246 | 351580 | 2.62 | 0.00E+00 | transcription_start_site | + | 352055 | 352055 | -642  | 26641 | AN6801 |
| 116 CONTIG113  | 13071  | 14466  | 3.15 | 0.00E+00 | transcription_start_site | - | 12452  | 12452  | -1316 | 26650 | AN6804 |
| 116 CONTIG113  | 13071  | 14466  | 3.15 | 0.00E+00 | transcription_start_site | - | 12260  | 12260  | -1508 | 26651 | AN6804 |
| 116 CONTIG113  | 13071  | 14466  | 3.15 | 0.00E+00 | transcription_start_site | - | 11824  | 11824  | -1944 | 26652 | AN6804 |
| 116 CONTIG113  | 13071  | 14466  | 3.15 | 0.00E+00 | transcription_start_site | - | 11521  | 11521  | -2247 | 26653 | AN6804 |
| 116 CONTIG113  | 13071  | 14466  | 3.15 | 0.00E+00 | transcription_start_site | - | 11075  | 11075  | -2693 | 26654 | AN6804 |
| 116 CONTIG113  | 13071  | 14466  | 3.15 | 0.00E+00 | transcription_start_site | - | 10868  | 10868  | -2900 | 26655 | AN6804 |
| 116 CONTIG113  | 13071  | 14466  | 3.15 | 0.00E+00 | transcription_start_site | - | 10710  | 10710  | -3058 | 26656 | AN6804 |
| 116 CONTIG113  | 13071  | 14466  | 3.15 | 0.00E+00 | transcription_start_site | - | 10522  | 10522  | -3246 | 26657 | AN6804 |
| 116 CONTIG113  | 13071  | 14466  | 3.15 | 0.00E+00 | transcription_start_site | - | 10399  | 10399  | -3369 | 26658 | AN6804 |
| 116 CONTIG113  | 13071  | 14466  | 3.15 | 0.00E+00 | transcription_start_site | - | 10256  | 10256  | -3512 | 26659 | AN6804 |
| 397 CONTIG113  | 12456  | 12745  | 2.61 | 1.54E-03 | transcription_start_site | - | 12452  | 12452  | -148  | 26650 | AN6804 |
| 397 CONTIG113  | 12456  | 12745  | 2.61 | 1.54E-03 | transcription_start_site | - | 12260  | 12260  | -340  | 26651 | AN6804 |
| 397 CONTIG113  | 12456  | 12745  | 2.61 | 1.54E-03 | transcription_start_site | - | 11824  | 11824  | -776  | 26652 | AN6804 |
| 397 CONTIG113  | 12456  | 12745  | 2.61 | 1.54E-03 | transcription_start_site | - | 11521  | 11521  | -1079 | 26653 | AN6804 |
| 397 CONTIG113  | 12456  | 12745  | 2.61 | 1.54E-03 | transcription_start_site | - | 11075  | 11075  | -1525 | 26654 | AN6804 |
| 397 CONTIG113  | 12456  | 12745  | 2.61 | 1.54E-03 | transcription_start_site | - | 10868  | 10868  | -1732 | 26655 | AN6804 |
| 397 CONTIG113  | 12456  | 12745  | 2.61 | 1.54E-03 | transcription_start_site | - | 10710  | 10710  | -1890 | 26656 | AN6804 |
| 397 CONTIG113  | 12456  | 12745  | 2.61 | 1.54E-03 | transcription_start_site | - | 10522  | 10522  | -2078 | 26657 | AN6804 |
| 397 CONTIG113  | 12456  | 12745  | 2.61 | 1.54E-03 | transcription_start_site | - | 10399  | 10399  | -2201 | 26658 | AN6804 |
| 397 CONTIG113  | 12456  | 12745  | 2.61 | 1.54E-03 | transcription_start_site | - | 10256  | 10256  | -2344 | 26659 | AN6804 |
| 1979 CONTIG113 | 10671  | 11975  | 1.38 | 8.00E-02 | transcription_start_site | - | 11521  | 11521  | 198   | 26653 | AN6804 |
| 1979 CONTIG113 | 10671  | 11975  | 1.38 | 8.00E-02 | transcription_start_site | - | 11075  | 11075  | -248  | 26654 | AN6804 |
| 1979 CONTIG113 | 10671  | 11975  | 1.38 | 8.00E-02 | transcription_start_site | - | 10868  | 10868  | -455  | 26655 | AN6804 |
| 1979 CONTIG113 | 10671  | 11975  | 1.38 | 8.00E-02 | transcription_start_site | - | 11824  | 11824  | 501   | 26652 | AN6804 |
| 1979 CONTIG113 | 10671  | 11975  | 1.38 | 8.00E-02 | transcription_start_site | - | 10710  | 10710  | -613  | 26656 | AN6804 |
| 1979 CONTIG113 | 10671  | 11975  | 1.38 | 8.00E-02 | transcription_start_site | - | 10522  | 10522  | -801  | 26657 | AN6804 |
| 1979 CONTIG113 | 10671  | 11975  | 1.38 | 8.00E-02 | transcription_start_site | - | 10399  | 10399  | -924  | 26658 | AN6804 |
| 1979 CONTIG113 | 10671  | 11975  | 1.38 | 8.00E-02 | transcription_start_site | - | 12260  | 12260  | 937   | 26651 | AN6804 |
| 1979 CONTIG113 | 10671  | 11975  | 1.38 | 8.00E-02 | transcription_start_site | - | 10256  | 10256  | -1067 | 26659 | AN6804 |
| 1979 CONTIG113 | 10671  | 11975  | 1.38 | 8.00E-02 | transcription_start_site | - | 12452  | 12452  | 1129  | 26650 | AN6804 |
| 939 CONTIG113  | 27092  | 27351  | 1.97 | 1.84E-02 | transcription_start_site | - | 23446  | 23446  | -3775 | 26660 | AN6805 |
| 939 CONTIG113  | 27092  | 27351  | 1.97 | 1.84E-02 | transcription_start_site | - | 22846  | 22846  | -4375 | 26661 | AN6805 |
| 939 CONTIG113  | 27092  | 27351  | 1.97 | 1.84E-02 | transcription_start_site | - | 22126  | 22126  | -5095 | 26662 | AN6805 |
| 1624 CONTIG113 | 24015  | 24279  | 1.53 | 8.01E-02 | transcription_start_site | - | 23446  | 23446  | -701  | 26660 | AN6805 |
| 1624 CONTIG113 | 24015  | 24279  | 1.53 | 8.01E-02 | transcription_start_site | - | 22846  | 22846  | -1301 | 26661 | AN6805 |
| 1624 CONTIG113 | 24015  | 24279  | 1.53 | 8.01E-02 | transcription_start_site | - | 22126  | 22126  | -2021 | 26662 | AN6805 |
| 1624 CONTIG113 | 24015  | 24279  | 1.53 | 8.01E-02 | transcription_start_site | + | 24985  | 24985  | -838  | 26663 | AN6806 |
| 1624 CONTIG113 | 24015  | 24279  | 1.53 | 8.01E-02 | transcription_start_site | + | 25287  | 25287  | -1140 | 26664 | AN6806 |
| 939 CONTIG113  | 27092  | 27351  | 1.97 | 1.84E-02 | transcription_start_site | + | 27735  | 27735  | -513  | 26665 | AN6807 |
| 939 CONTIG113  | 27092  | 27351  | 1.97 | 1.84E-02 | transcription_start_site | + | 29311  | 29311  | -2089 | 26666 | AN6807 |
| 939 CONTIG113  | 27092  | 27351  | 1.97 | 1.84E-02 | transcription_start_site | + | 29892  | 29892  | -2670 | 26667 | AN6807 |
| 939 CONTIG113  | 27092  | 27351  | 1.97 | 1.84E-02 | transcription_start_site | + | 31418  | 31418  | -4196 | 26668 | AN6807 |
| 939 CONTIG113  | 27092  | 27351  | 1.97 | 1.84E-02 | transcription_start_site | + | 31734  | 31734  | -4512 | 26669 | AN6807 |
| 939 CONTIG113  | 27092  | 27351  | 1.97 | 1.84E-02 | transcription_start_site | + | 31943  | 31943  | -4721 | 26670 | AN6807 |
| 1624 CONTIG113 | 24015  | 24279  | 1.53 | 8.01E-02 | transcription_start_site | + | 27735  | 27735  | -3588 | 26665 | AN6807 |
| 1987 CONTIG113 | 61430  | 61784  | 1.38 | 1.25E-01 | transcription_start_site | - | 56689  | 56689  | -4918 | 26702 | AN6816 |
| 1987 CONTIG113 | 61430  | 61784  | 1.38 | 1.25E-01 | transcription_start_site | + | 60477  | 60477  | 1130  | 26708 | AN6819 |



|                |        |        |      |          |                          |   |        |        |       |       |        |
|----------------|--------|--------|------|----------|--------------------------|---|--------|--------|-------|-------|--------|
| 1987 CONTIG113 | 61430  | 61784  | 1.38 | 1.25E-01 | transcription_start_site | + | 61679  | 61679  | -72   | 26709 | AN6820 |
| 1987 CONTIG113 | 61430  | 61784  | 1.38 | 1.25E-01 | transcription_start_site | + | 61860  | 61860  | -253  | 26710 | AN6820 |
| 1987 CONTIG113 | 61430  | 61784  | 1.38 | 1.25E-01 | transcription_start_site | + | 64778  | 64778  | -3171 | 26711 | AN6820 |
| 77 CONTIG113   | 73427  | 73851  | 3.3  | 0.00E+00 | transcription_start_site | - | 71040  | 71040  | -2599 | 26714 | AN6822 |
| 77 CONTIG113   | 73427  | 73851  | 3.3  | 0.00E+00 | transcription_start_site | - | 70822  | 70822  | -2817 | 26715 | AN6822 |
| 77 CONTIG113   | 73427  | 73851  | 3.3  | 0.00E+00 | transcription_start_site | - | 70356  | 70356  | -3283 | 26716 | AN6822 |
| 77 CONTIG113   | 73427  | 73851  | 3.3  | 0.00E+00 | transcription_start_site | - | 70040  | 70040  | -3599 | 26717 | AN6822 |
| 117 CONTIG113  | 74717  | 75056  | 3.15 | 0.00E+00 | transcription_start_site | - | 71040  | 71040  | -3846 | 26714 | AN6822 |
| 117 CONTIG113  | 74717  | 75056  | 3.15 | 0.00E+00 | transcription_start_site | - | 70822  | 70822  | -4064 | 26715 | AN6822 |
| 117 CONTIG113  | 74717  | 75056  | 3.15 | 0.00E+00 | transcription_start_site | - | 70356  | 70356  | -4530 | 26716 | AN6822 |
| 117 CONTIG113  | 74717  | 75056  | 3.15 | 0.00E+00 | transcription_start_site | - | 70040  | 70040  | -4846 | 26717 | AN6822 |
| 336 CONTIG113  | 73892  | 74466  | 2.71 | 1.01E-03 | transcription_start_site | - | 71040  | 71040  | -3139 | 26714 | AN6822 |
| 336 CONTIG113  | 73892  | 74466  | 2.71 | 1.01E-03 | transcription_start_site | - | 70822  | 70822  | -3357 | 26715 | AN6822 |
| 336 CONTIG113  | 73892  | 74466  | 2.71 | 1.01E-03 | transcription_start_site | - | 70356  | 70356  | -3823 | 26716 | AN6822 |
| 336 CONTIG113  | 73892  | 74466  | 2.71 | 1.01E-03 | transcription_start_site | - | 70040  | 70040  | -4139 | 26717 | AN6822 |
| 1332 CONTIG113 | 75767  | 77001  | 1.67 | 3.33E-02 | transcription_start_site | - | 71040  | 71040  | -5344 | 26714 | AN6822 |
| 1332 CONTIG113 | 75767  | 77001  | 1.67 | 3.33E-02 | transcription_start_site | - | 70822  | 70822  | -5562 | 26715 | AN6822 |
| 1335 CONTIG113 | 70206  | 70475  | 1.67 | 5.22E-02 | transcription_start_site | - | 70356  | 70356  | 15    | 26716 | AN6822 |
| 1335 CONTIG113 | 70206  | 70475  | 1.67 | 5.22E-02 | transcription_start_site | - | 70040  | 70040  | -300  | 26717 | AN6822 |
| 1335 CONTIG113 | 70206  | 70475  | 1.67 | 5.22E-02 | transcription_start_site | - | 70822  | 70822  | 481   | 26715 | AN6822 |
| 1335 CONTIG113 | 70206  | 70475  | 1.67 | 5.22E-02 | transcription_start_site | - | 71040  | 71040  | 699   | 26714 | AN6822 |
| 77 CONTIG113   | 73427  | 73851  | 3.3  | 0.00E+00 | transcription_start_site | - | 72744  | 72744  | -895  | 26718 | AN6823 |
| 117 CONTIG113  | 74717  | 75056  | 3.15 | 0.00E+00 | transcription_start_site | - | 72744  | 72744  | -2142 | 26718 | AN6823 |
| 336 CONTIG113  | 73892  | 74466  | 2.71 | 1.01E-03 | transcription_start_site | - | 72744  | 72744  | -1435 | 26718 | AN6823 |
| 563 CONTIG113  | 77102  | 77828  | 2.36 | 1.22E-03 | transcription_start_site | - | 72744  | 72744  | -4721 | 26718 | AN6823 |
| 1332 CONTIG113 | 75767  | 77001  | 1.67 | 3.33E-02 | transcription_start_site | - | 72744  | 72744  | -3640 | 26718 | AN6823 |
| 117 CONTIG113  | 74717  | 75056  | 3.15 | 0.00E+00 | transcription_start_site | + | 79686  | 79686  | -4799 | 26719 | AN6824 |
| 117 CONTIG113  | 74717  | 75056  | 3.15 | 0.00E+00 | transcription_start_site | + | 79767  | 79767  | -4880 | 26720 | AN6824 |
| 117 CONTIG113  | 74717  | 75056  | 3.15 | 0.00E+00 | transcription_start_site | + | 79866  | 79866  | -4979 | 26721 | AN6824 |
| 563 CONTIG113  | 77102  | 77828  | 2.36 | 1.22E-03 | transcription_start_site | + | 79686  | 79686  | -2221 | 26719 | AN6824 |
| 563 CONTIG113  | 77102  | 77828  | 2.36 | 1.22E-03 | transcription_start_site | + | 79767  | 79767  | -2302 | 26720 | AN6824 |
| 563 CONTIG113  | 77102  | 77828  | 2.36 | 1.22E-03 | transcription_start_site | + | 79866  | 79866  | -2401 | 26721 | AN6824 |
| 563 CONTIG113  | 77102  | 77828  | 2.36 | 1.22E-03 | transcription_start_site | + | 80944  | 80944  | -3479 | 26722 | AN6824 |
| 1332 CONTIG113 | 75767  | 77001  | 1.67 | 3.33E-02 | transcription_start_site | + | 79686  | 79686  | -3302 | 26719 | AN6824 |
| 1332 CONTIG113 | 75767  | 77001  | 1.67 | 3.33E-02 | transcription_start_site | + | 79767  | 79767  | -3383 | 26720 | AN6824 |
| 1332 CONTIG113 | 75767  | 77001  | 1.67 | 3.33E-02 | transcription_start_site | + | 79866  | 79866  | -3482 | 26721 | AN6824 |
| 1332 CONTIG113 | 75767  | 77001  | 1.67 | 3.33E-02 | transcription_start_site | + | 80944  | 80944  | -4560 | 26722 | AN6824 |
| 1625 CONTIG113 | 78602  | 78891  | 1.53 | 8.01E-02 | transcription_start_site | + | 79686  | 79686  | -939  | 26719 | AN6824 |
| 1625 CONTIG113 | 78602  | 78891  | 1.53 | 8.01E-02 | transcription_start_site | + | 79767  | 79767  | -1020 | 26720 | AN6824 |
| 1625 CONTIG113 | 78602  | 78891  | 1.53 | 8.01E-02 | transcription_start_site | + | 79866  | 79866  | -1119 | 26721 | AN6824 |
| 1625 CONTIG113 | 78602  | 78891  | 1.53 | 8.01E-02 | transcription_start_site | + | 80944  | 80944  | -2197 | 26722 | AN6824 |
| 1625 CONTIG113 | 78602  | 78891  | 1.53 | 8.01E-02 | transcription_start_site | + | 83420  | 83420  | -4673 | 26723 | AN6825 |
| 1625 CONTIG113 | 78602  | 78891  | 1.53 | 8.01E-02 | transcription_start_site | + | 83765  | 83765  | -5018 | 26724 | AN6825 |
| 149 CONTIG113  | 104254 | 104678 | 3.05 | 0.00E+00 | transcription_start_site | - | 100037 | 100037 | -4429 | 26735 | AN6830 |
| 149 CONTIG113  | 104254 | 104678 | 3.05 | 0.00E+00 | transcription_start_site | - | 99704  | 99704  | -4762 | 26736 | AN6830 |
| 149 CONTIG113  | 104254 | 104678 | 3.05 | 0.00E+00 | transcription_start_site | - | 103859 | 103859 | -607  | 26739 | AN6831 |
| 149 CONTIG113  | 104254 | 104678 | 3.05 | 0.00E+00 | transcription_start_site | - | 103727 | 103727 | -739  | 26740 | AN6831 |
| 149 CONTIG113  | 104254 | 104678 | 3.05 | 0.00E+00 | transcription_start_site | - | 102859 | 102859 | -1607 | 26741 | AN6831 |
| 149 CONTIG113  | 104254 | 104678 | 3.05 | 0.00E+00 | transcription_start_site | - | 102147 | 102147 | -2319 | 26742 | AN6831 |
| 1988 CONTIG113 | 108526 | 108892 | 1.38 | 1.25E-01 | transcription_start_site | - | 103859 | 103859 | -4850 | 26739 | AN6831 |
| 1988 CONTIG113 | 108526 | 108892 | 1.38 | 1.25E-01 | transcription_start_site | - | 103727 | 103727 | -4982 | 26740 | AN6831 |
| 149 CONTIG113  | 104254 | 104678 | 3.05 | 0.00E+00 | transcription_start_site | - | 104386 | 104386 | -80   | 26748 | AN6832 |
| 149 CONTIG113  | 104254 | 104678 | 3.05 | 0.00E+00 | transcription_start_site | - | 104703 | 104703 | 237   | 26747 | AN6832 |
| 149 CONTIG113  | 104254 | 104678 | 3.05 | 0.00E+00 | transcription_start_site | - | 104816 | 104816 | 350   | 26746 | AN6832 |
| 1988 CONTIG113 | 108526 | 108892 | 1.38 | 1.25E-01 | transcription_start_site | - | 107221 | 107221 | -1488 | 26743 | AN6832 |
| 1988 CONTIG113 | 108526 | 108892 | 1.38 | 1.25E-01 | transcription_start_site | - | 106922 | 106922 | -1787 | 26744 | AN6832 |
| 1988 CONTIG113 | 108526 | 108892 | 1.38 | 1.25E-01 | transcription_start_site | - | 105820 | 105820 | -2889 | 26745 | AN6832 |

|      |           |        |        |      |          |                          |   |        |        |       |       |        |
|------|-----------|--------|--------|------|----------|--------------------------|---|--------|--------|-------|-------|--------|
| 1988 | CONTIG113 | 108526 | 108892 | 1.38 | 1.25E-01 | transcription_start_site | - | 104816 | 104816 | -3893 | 26746 | AN6832 |
| 1988 | CONTIG113 | 108526 | 108892 | 1.38 | 1.25E-01 | transcription_start_site | - | 104703 | 104703 | -4006 | 26747 | AN6832 |
| 1988 | CONTIG113 | 108526 | 108892 | 1.38 | 1.25E-01 | transcription_start_site | - | 104386 | 104386 | -4323 | 26748 | AN6832 |
| 173  | CONTIG113 | 113638 | 113906 | 3    | 2.39E-04 | transcription_start_site | + | 112959 | 112959 | 813   | 26752 | AN6833 |
| 173  | CONTIG113 | 113638 | 113906 | 3    | 2.39E-04 | transcription_start_site | + | 112717 | 112717 | 1055  | 26751 | AN6833 |
| 1626 | CONTIG113 | 112363 | 112627 | 1.53 | 8.01E-02 | transcription_start_site | + | 112524 | 112524 | -29   | 26750 | AN6833 |
| 1626 | CONTIG113 | 112363 | 112627 | 1.53 | 8.01E-02 | transcription_start_site | + | 112307 | 112307 | 188   | 26749 | AN6833 |
| 1626 | CONTIG113 | 112363 | 112627 | 1.53 | 8.01E-02 | transcription_start_site | + | 112717 | 112717 | -222  | 26751 | AN6833 |
| 1626 | CONTIG113 | 112363 | 112627 | 1.53 | 8.01E-02 | transcription_start_site | + | 112959 | 112959 | -464  | 26752 | AN6833 |
| 1988 | CONTIG113 | 108526 | 108892 | 1.38 | 1.25E-01 | transcription_start_site | + | 112307 | 112307 | -3598 | 26749 | AN6833 |
| 1988 | CONTIG113 | 108526 | 108892 | 1.38 | 1.25E-01 | transcription_start_site | + | 112524 | 112524 | -3815 | 26750 | AN6833 |
| 1988 | CONTIG113 | 108526 | 108892 | 1.38 | 1.25E-01 | transcription_start_site | + | 112717 | 112717 | -4008 | 26751 | AN6833 |
| 1988 | CONTIG113 | 108526 | 108892 | 1.38 | 1.25E-01 | transcription_start_site | + | 112959 | 112959 | -4250 | 26752 | AN6833 |
| 565  | CONTIG113 | 115812 | 116151 | 2.36 | 4.61E-03 | transcription_start_site | - | 115850 | 115850 | -131  | 26753 | AN6834 |
| 565  | CONTIG113 | 115812 | 116151 | 2.36 | 4.61E-03 | transcription_start_site | - | 115235 | 115235 | -746  | 26754 | AN6834 |
| 565  | CONTIG113 | 115812 | 116151 | 2.36 | 4.61E-03 | transcription_start_site | - | 114916 | 114916 | -1065 | 26755 | AN6834 |
| 1115 | CONTIG113 | 114387 | 115406 | 1.82 | 1.81E-02 | transcription_start_site | - | 114916 | 114916 | 19    | 26755 | AN6834 |
| 1115 | CONTIG113 | 114387 | 115406 | 1.82 | 1.81E-02 | transcription_start_site | - | 115235 | 115235 | 338   | 26754 | AN6834 |
| 1115 | CONTIG113 | 114387 | 115406 | 1.82 | 1.81E-02 | transcription_start_site | - | 115850 | 115850 | 953   | 26753 | AN6834 |
| 2124 | CONTIG113 | 117387 | 118481 | 1.33 | 1.44E-01 | transcription_start_site | - | 115850 | 115850 | -2084 | 26753 | AN6834 |
| 2124 | CONTIG113 | 117387 | 118481 | 1.33 | 1.44E-01 | transcription_start_site | - | 115235 | 115235 | -2699 | 26754 | AN6834 |
| 2124 | CONTIG113 | 117387 | 118481 | 1.33 | 1.44E-01 | transcription_start_site | - | 114916 | 114916 | -3018 | 26755 | AN6834 |
| 2420 | CONTIG113 | 118587 | 119526 | 1.23 | 1.79E-01 | transcription_start_site | - | 115850 | 115850 | -3206 | 26753 | AN6834 |
| 2420 | CONTIG113 | 118587 | 119526 | 1.23 | 1.79E-01 | transcription_start_site | - | 115235 | 115235 | -3821 | 26754 | AN6834 |
| 2420 | CONTIG113 | 118587 | 119526 | 1.23 | 1.79E-01 | transcription_start_site | - | 114916 | 114916 | -4140 | 26755 | AN6834 |
| 2122 | CONTIG113 | 123527 | 123876 | 1.33 | 1.28E-01 | transcription_start_site | - | 120938 | 120938 | -2763 | 26756 | AN6835 |
| 2124 | CONTIG113 | 117387 | 118481 | 1.33 | 1.44E-01 | transcription_start_site | - | 118266 | 118266 | 332   | 26758 | AN6835 |
| 2124 | CONTIG113 | 117387 | 118481 | 1.33 | 1.44E-01 | transcription_start_site | - | 118518 | 118518 | 584   | 26757 | AN6835 |
| 2271 | CONTIG113 | 120992 | 121341 | 1.28 | 1.66E-01 | transcription_start_site | - | 120938 | 120938 | -228  | 26756 | AN6835 |
| 2271 | CONTIG113 | 120992 | 121341 | 1.28 | 1.66E-01 | transcription_start_site | - | 118518 | 118518 | -2648 | 26757 | AN6835 |
| 2271 | CONTIG113 | 120992 | 121341 | 1.28 | 1.66E-01 | transcription_start_site | - | 118266 | 118266 | -2900 | 26758 | AN6835 |
| 2420 | CONTIG113 | 118587 | 119526 | 1.23 | 1.79E-01 | transcription_start_site | - | 118518 | 118518 | -538  | 26757 | AN6835 |
| 2420 | CONTIG113 | 118587 | 119526 | 1.23 | 1.79E-01 | transcription_start_site | - | 118266 | 118266 | -790  | 26758 | AN6835 |
| 2122 | CONTIG113 | 123527 | 123876 | 1.33 | 1.28E-01 | transcription_start_site | - | 123511 | 123511 | -190  | 26759 | AN6836 |
| 2122 | CONTIG113 | 123527 | 123876 | 1.33 | 1.28E-01 | transcription_start_site | - | 123265 | 123265 | -436  | 26760 | AN6836 |
| 2122 | CONTIG113 | 123527 | 123876 | 1.33 | 1.28E-01 | transcription_start_site | - | 122769 | 122769 | -932  | 26761 | AN6836 |
| 457  | CONTIG113 | 153693 | 154032 | 2.51 | 2.22E-03 | transcription_start_site | - | 149173 | 149173 | -4689 | 26797 | AN6847 |
| 457  | CONTIG113 | 153693 | 154032 | 2.51 | 2.22E-03 | transcription_start_site | - | 148952 | 148952 | -4910 | 26798 | AN6847 |
| 1190 | CONTIG113 | 151288 | 151552 | 1.77 | 3.70E-02 | transcription_start_site | - | 149173 | 149173 | -2247 | 26797 | AN6847 |
| 1190 | CONTIG113 | 151288 | 151552 | 1.77 | 3.70E-02 | transcription_start_site | - | 148952 | 148952 | -2468 | 26798 | AN6847 |
| 457  | CONTIG113 | 153693 | 154032 | 2.51 | 2.22E-03 | transcription_start_site | - | 152935 | 152935 | -927  | 26801 | AN6849 |
| 457  | CONTIG113 | 153693 | 154032 | 2.51 | 2.22E-03 | transcription_start_site | - | 154756 | 154756 | 893   | 26803 | AN6850 |
| 1433 | CONTIG113 | 161038 | 161389 | 1.62 | 5.88E-02 | transcription_start_site | - | 156349 | 156349 | -4864 | 26802 | AN6850 |
| 1868 | CONTIG113 | 158253 | 159052 | 1.43 | 1.08E-01 | transcription_start_site | - | 156349 | 156349 | -2303 | 26802 | AN6850 |
| 1868 | CONTIG113 | 158253 | 159052 | 1.43 | 1.08E-01 | transcription_start_site | - | 154756 | 154756 | -3896 | 26803 | AN6850 |
| 732  | CONTIG113 | 174385 | 174804 | 2.17 | 8.81E-03 | transcription_start_site | - | 173835 | 173835 | -759  | 26814 | AN6857 |
| 732  | CONTIG113 | 174385 | 174804 | 2.17 | 8.81E-03 | transcription_start_site | + | 174915 | 174915 | -320  | 26815 | AN6858 |
| 732  | CONTIG113 | 174385 | 174804 | 2.17 | 8.81E-03 | transcription_start_site | + | 175221 | 175221 | -626  | 26816 | AN6858 |
| 732  | CONTIG113 | 174385 | 174804 | 2.17 | 8.81E-03 | transcription_start_site | + | 176158 | 176158 | -1563 | 26817 | AN6858 |
| 172  | CONTIG113 | 180303 | 180887 | 3    | 0.00E+00 | transcription_start_site | + | 181917 | 181917 | -1322 | 26818 | AN6859 |
| 172  | CONTIG113 | 180303 | 180887 | 3    | 0.00E+00 | transcription_start_site | + | 182445 | 182445 | -1850 | 26819 | AN6859 |
| 1627 | CONTIG113 | 182328 | 182617 | 1.53 | 8.01E-02 | transcription_start_site | + | 182445 | 182445 | 27    | 26819 | AN6859 |
| 1627 | CONTIG113 | 182328 | 182617 | 1.53 | 8.01E-02 | transcription_start_site | + | 181917 | 181917 | 555   | 26818 | AN6859 |
| 242  | CONTIG113 | 187055 | 187334 | 2.86 | 5.64E-04 | transcription_start_site | - | 183867 | 183867 | -3327 | 26820 | AN6860 |
| 242  | CONTIG113 | 187055 | 187334 | 2.86 | 5.64E-04 | transcription_start_site | - | 183713 | 183713 | -3481 | 26821 | AN6860 |
| 242  | CONTIG113 | 187055 | 187334 | 2.86 | 5.64E-04 | transcription_start_site | - | 183625 | 183625 | -3569 | 26822 | AN6860 |
| 566  | CONTIG113 | 184355 | 184644 | 2.36 | 4.61E-03 | transcription_start_site | - | 183867 | 183867 | -632  | 26820 | AN6860 |

|      |           |        |        |      |          |                          |   |        |        |       |       |        |
|------|-----------|--------|--------|------|----------|--------------------------|---|--------|--------|-------|-------|--------|
| 566  | CONTIG113 | 184355 | 184644 | 2.36 | 4.61E-03 | transcription_start_site | - | 183713 | 183713 | -786  | 26821 | AN6860 |
| 566  | CONTIG113 | 184355 | 184644 | 2.36 | 4.61E-03 | transcription_start_site | - | 183625 | 183625 | -874  | 26822 | AN6860 |
| 242  | CONTIG113 | 187055 | 187334 | 2.86 | 5.64E-04 | transcription_start_site | + | 187065 | 187065 | 129   | 26825 | AN6861 |
| 242  | CONTIG113 | 187055 | 187334 | 2.86 | 5.64E-04 | transcription_start_site | + | 186310 | 186310 | 884   | 26824 | AN6861 |
| 242  | CONTIG113 | 187055 | 187334 | 2.86 | 5.64E-04 | transcription_start_site | + | 186058 | 186058 | 1136  | 26823 | AN6861 |
| 566  | CONTIG113 | 184355 | 184644 | 2.36 | 4.61E-03 | transcription_start_site | + | 186058 | 186058 | -1558 | 26823 | AN6861 |
| 566  | CONTIG113 | 184355 | 184644 | 2.36 | 4.61E-03 | transcription_start_site | + | 186310 | 186310 | -1810 | 26824 | AN6861 |
| 566  | CONTIG113 | 184355 | 184644 | 2.36 | 4.61E-03 | transcription_start_site | + | 187065 | 187065 | -2565 | 26825 | AN6861 |
| 1627 | CONTIG113 | 182328 | 182617 | 1.53 | 8.01E-02 | transcription_start_site | + | 186058 | 186058 | -3585 | 26823 | AN6861 |
| 1627 | CONTIG113 | 182328 | 182617 | 1.53 | 8.01E-02 | transcription_start_site | + | 186310 | 186310 | -3837 | 26824 | AN6861 |
| 1627 | CONTIG113 | 182328 | 182617 | 1.53 | 8.01E-02 | transcription_start_site | + | 187065 | 187065 | -4592 | 26825 | AN6861 |
| 242  | CONTIG113 | 187055 | 187334 | 2.86 | 5.64E-04 | transcription_start_site | + | 187495 | 187495 | -300  | 26826 | AN6862 |
| 566  | CONTIG113 | 184355 | 184644 | 2.36 | 4.61E-03 | transcription_start_site | + | 187495 | 187495 | -2995 | 26826 | AN6862 |
| 1627 | CONTIG113 | 182328 | 182617 | 1.53 | 8.01E-02 | transcription_start_site | + | 187495 | 187495 | -5022 | 26826 | AN6862 |
| 242  | CONTIG113 | 187055 | 187334 | 2.86 | 5.64E-04 | transcription_start_site | + | 188620 | 188620 | -1425 | 26827 | AN6863 |
| 242  | CONTIG113 | 187055 | 187334 | 2.86 | 5.64E-04 | transcription_start_site | + | 189030 | 189030 | -1835 | 26828 | AN6863 |
| 566  | CONTIG113 | 184355 | 184644 | 2.36 | 4.61E-03 | transcription_start_site | + | 188620 | 188620 | -4120 | 26827 | AN6863 |
| 566  | CONTIG113 | 184355 | 184644 | 2.36 | 4.61E-03 | transcription_start_site | + | 189030 | 189030 | -4530 | 26828 | AN6863 |
| 242  | CONTIG113 | 187055 | 187334 | 2.86 | 5.64E-04 | transcription_start_site | + | 191087 | 191087 | -3892 | 26829 | AN6864 |
| 242  | CONTIG113 | 187055 | 187334 | 2.86 | 5.64E-04 | transcription_start_site | + | 191763 | 191763 | -4568 | 26830 | AN6864 |
| 1865 | CONTIG113 | 223577 | 224236 | 1.43 | 9.26E-02 | transcription_start_site | - | 222840 | 222840 | -1066 | 26860 | AN6875 |
| 1865 | CONTIG113 | 223577 | 224236 | 1.43 | 9.26E-02 | transcription_start_site | - | 222351 | 222351 | -1555 | 26861 | AN6875 |
| 1865 | CONTIG113 | 223577 | 224236 | 1.43 | 9.26E-02 | transcription_start_site | - | 222134 | 222134 | -1772 | 26862 | AN6875 |
| 1865 | CONTIG113 | 223577 | 224236 | 1.43 | 9.26E-02 | transcription_start_site | + | 228453 | 228453 | -4546 | 26864 | AN6876 |
| 1865 | CONTIG113 | 223577 | 224236 | 1.43 | 9.26E-02 | transcription_start_site | + | 228619 | 228619 | -4712 | 26865 | AN6876 |
| 1051 | CONTIG113 | 279320 | 279654 | 1.87 | 2.62E-02 | transcription_start_site | - | 278326 | 278326 | -1161 | 26914 | AN6892 |
| 1051 | CONTIG113 | 279320 | 279654 | 1.87 | 2.62E-02 | transcription_start_site | - | 276998 | 276998 | -2489 | 26915 | AN6892 |
| 1051 | CONTIG113 | 279320 | 279654 | 1.87 | 2.62E-02 | transcription_start_site | + | 280228 | 280228 | -741  | 26916 | AN6893 |
| 1051 | CONTIG113 | 279320 | 279654 | 1.87 | 2.62E-02 | transcription_start_site | + | 280425 | 280425 | -938  | 26917 | AN6893 |
| 1051 | CONTIG113 | 279320 | 279654 | 1.87 | 2.62E-02 | transcription_start_site | + | 282217 | 282217 | -2730 | 26918 | AN6893 |
| 1051 | CONTIG113 | 279320 | 279654 | 1.87 | 2.62E-02 | transcription_start_site | + | 282826 | 282826 | -3339 | 26919 | AN6894 |
| 1051 | CONTIG113 | 279320 | 279654 | 1.87 | 2.62E-02 | transcription_start_site | + | 282888 | 282888 | -3401 | 26920 | AN6894 |
| 1051 | CONTIG113 | 279320 | 279654 | 1.87 | 2.62E-02 | transcription_start_site | + | 282974 | 282974 | -3487 | 26921 | AN6894 |
| 1051 | CONTIG113 | 279320 | 279654 | 1.87 | 2.62E-02 | transcription_start_site | + | 284238 | 284238 | -4751 | 26922 | AN6894 |
| 2957 | CONTIG114 | 4136   | 4490   | 0.96 | 6.84E-02 | transcription_start_site | + | 4146   | 4146   | 167   | 26967 | AN6908 |
| 2957 | CONTIG114 | 4136   | 4490   | 0.96 | 6.84E-02 | transcription_start_site | + | 5266   | 5266   | -953  | 26968 | AN6908 |
| 2957 | CONTIG114 | 4136   | 4490   | 0.96 | 6.84E-02 | transcription_start_site | + | 5510   | 5510   | -1197 | 26969 | AN6908 |
| 2957 | CONTIG114 | 4136   | 4490   | 0.96 | 6.84E-02 | transcription_start_site | + | 7152   | 7152   | -2839 | 26970 | AN6909 |
| 2957 | CONTIG114 | 4136   | 4490   | 0.96 | 6.84E-02 | transcription_start_site | + | 7281   | 7281   | -2968 | 26971 | AN6909 |
| 2957 | CONTIG114 | 4136   | 4490   | 0.96 | 6.84E-02 | transcription_start_site | + | 7472   | 7472   | -3159 | 26972 | AN6909 |
| 2204 | CONTIG114 | 21686  | 21970  | 1.29 | 1.11E-02 | transcription_start_site | - | 21933  | 21933  | 105   | 27005 | AN6916 |
| 2204 | CONTIG114 | 21686  | 21970  | 1.29 | 1.11E-02 | transcription_start_site | - | 22192  | 22192  | 364   | 27004 | AN6916 |
| 2204 | CONTIG114 | 21686  | 21970  | 1.29 | 1.11E-02 | transcription_start_site | - | 22526  | 22526  | 698   | 27003 | AN6916 |
| 2204 | CONTIG114 | 21686  | 21970  | 1.29 | 1.11E-02 | transcription_start_site | - | 22702  | 22702  | 874   | 27002 | AN6916 |
| 2204 | CONTIG114 | 21686  | 21970  | 1.29 | 1.11E-02 | transcription_start_site | - | 22771  | 22771  | 943   | 27001 | AN6916 |
| 2204 | CONTIG114 | 21686  | 21970  | 1.29 | 1.11E-02 | transcription_start_site | - | 22884  | 22884  | 1056  | 27000 | AN6916 |
| 3012 | CONTIG115 | 2571   | 2900   | 0.9  | 1.93E-01 | transcription_start_site | + | 2165   | 2165   | 570   | 27007 | AN6917 |
| 3012 | CONTIG115 | 2571   | 2900   | 0.9  | 1.93E-01 | transcription_start_site | + | 1751   | 1751   | 984   | 27006 | AN6917 |
| 3012 | CONTIG115 | 2571   | 2900   | 0.9  | 1.93E-01 | transcription_start_site | + | 3066   | 3066   | -330  | 27008 | AN6918 |
| 3012 | CONTIG115 | 2571   | 2900   | 0.9  | 1.93E-01 | transcription_start_site | + | 3452   | 3452   | -716  | 27009 | AN6918 |
| 3012 | CONTIG115 | 2571   | 2900   | 0.9  | 1.93E-01 | transcription_start_site | + | 3658   | 3658   | -922  | 27010 | AN6918 |
| 3012 | CONTIG115 | 2571   | 2900   | 0.9  | 1.93E-01 | transcription_start_site | + | 3791   | 3791   | -1055 | 27011 | AN6918 |
| 2897 | CONTIG115 | 16141  | 16485  | 1    | 1.25E-01 | transcription_start_site | + | 16199  | 16199  | 114   | 27035 | AN6923 |
| 2897 | CONTIG115 | 16141  | 16485  | 1    | 1.25E-01 | transcription_start_site | + | 16752  | 16752  | -439  | 27036 | AN6923 |
| 2897 | CONTIG115 | 16141  | 16485  | 1    | 1.25E-01 | transcription_start_site | + | 15574  | 15574  | 739   | 27034 | AN6923 |
| 2897 | CONTIG115 | 16141  | 16485  | 1    | 1.25E-01 | transcription_start_site | + | 15402  | 15402  | 911   | 27033 | AN6923 |
| 2897 | CONTIG115 | 16141  | 16485  | 1    | 1.25E-01 | transcription_start_site | + | 15290  | 15290  | 1023  | 27032 | AN6923 |

|      |           |       |       |      |          |                          |   |        |        |       |       |        |
|------|-----------|-------|-------|------|----------|--------------------------|---|--------|--------|-------|-------|--------|
| 2897 | CONTIG115 | 16141 | 16485 | 1    | 1.25E-01 | transcription_start_site | + | 15204  | 15204  | 1109  | 27031 | AN6923 |
| 198  | CONTIG115 | 18456 | 18962 | 2.94 | 0.00E+00 | transcription_start_site | + | 19610  | 19610  | -901  | 27037 | AN6924 |
| 198  | CONTIG115 | 18456 | 18962 | 2.94 | 0.00E+00 | transcription_start_site | + | 19800  | 19800  | -1091 | 27038 | AN6924 |
| 198  | CONTIG115 | 18456 | 18962 | 2.94 | 0.00E+00 | transcription_start_site | + | 19910  | 19910  | -1201 | 27039 | AN6924 |
| 198  | CONTIG115 | 18456 | 18962 | 2.94 | 0.00E+00 | transcription_start_site | + | 20144  | 20144  | -1435 | 27040 | AN6924 |
| 198  | CONTIG115 | 18456 | 18962 | 2.94 | 0.00E+00 | transcription_start_site | + | 20406  | 20406  | -1697 | 27041 | AN6924 |
| 2897 | CONTIG115 | 16141 | 16485 | 1    | 1.25E-01 | transcription_start_site | + | 19610  | 19610  | -3297 | 27037 | AN6924 |
| 2897 | CONTIG115 | 16141 | 16485 | 1    | 1.25E-01 | transcription_start_site | + | 19800  | 19800  | -3487 | 27038 | AN6924 |
| 2897 | CONTIG115 | 16141 | 16485 | 1    | 1.25E-01 | transcription_start_site | + | 19910  | 19910  | -3597 | 27039 | AN6924 |
| 2897 | CONTIG115 | 16141 | 16485 | 1    | 1.25E-01 | transcription_start_site | + | 20144  | 20144  | -3831 | 27040 | AN6924 |
| 2897 | CONTIG115 | 16141 | 16485 | 1    | 1.25E-01 | transcription_start_site | + | 20406  | 20406  | -4093 | 27041 | AN6924 |
| 253  | CONTIG115 | 95627 | 95986 | 2.83 | 0.00E+00 | transcription_start_site | + | 95888  | 95888  | -81   | 27123 | AN6948 |
| 253  | CONTIG115 | 95627 | 95986 | 2.83 | 0.00E+00 | transcription_start_site | + | 96746  | 96746  | -939  | 27124 | AN6948 |
| 253  | CONTIG115 | 95627 | 95986 | 2.83 | 0.00E+00 | transcription_start_site | + | 99615  | 99615  | -3808 | 27125 | AN6949 |
| 253  | CONTIG115 | 95627 | 95986 | 2.83 | 0.00E+00 | transcription_start_site | + | 99800  | 99800  | -3993 | 27126 | AN6949 |
| 253  | CONTIG115 | 95627 | 95986 | 2.83 | 0.00E+00 | transcription_start_site | + | 100134 | 100134 | -4327 | 27127 | AN6949 |
| 253  | CONTIG115 | 95627 | 95986 | 2.83 | 0.00E+00 | transcription_start_site | + | 100643 | 100643 | -4836 | 27128 | AN6949 |
| 215  | CONTIG116 | 27090 | 27440 | 2.9  | 0.00E+00 | transcription_start_site | - | 23005  | 23005  | -4260 | 27171 | AN6961 |
| 215  | CONTIG116 | 27090 | 27440 | 2.9  | 0.00E+00 | transcription_start_site | - | 26206  | 26206  | -1059 | 27172 | AN6962 |
| 215  | CONTIG116 | 27090 | 27440 | 2.9  | 0.00E+00 | transcription_start_site | - | 25920  | 25920  | -1345 | 27173 | AN6962 |
| 215  | CONTIG116 | 27090 | 27440 | 2.9  | 0.00E+00 | transcription_start_site | - | 25639  | 25639  | -1626 | 27174 | AN6962 |
| 2048 | CONTIG116 | 30392 | 30652 | 1.35 | 3.70E-02 | transcription_start_site | - | 26206  | 26206  | -4316 | 27172 | AN6962 |
| 2048 | CONTIG116 | 30392 | 30652 | 1.35 | 3.70E-02 | transcription_start_site | - | 25920  | 25920  | -4602 | 27173 | AN6962 |
| 2048 | CONTIG116 | 30392 | 30652 | 1.35 | 3.70E-02 | transcription_start_site | - | 25639  | 25639  | -4883 | 27174 | AN6962 |
| 215  | CONTIG116 | 27090 | 27440 | 2.9  | 0.00E+00 | transcription_start_site | + | 27657  | 27657  | -392  | 27175 | AN6963 |
| 215  | CONTIG116 | 27090 | 27440 | 2.9  | 0.00E+00 | transcription_start_site | + | 27948  | 27948  | -683  | 27176 | AN6963 |
| 215  | CONTIG116 | 27090 | 27440 | 2.9  | 0.00E+00 | transcription_start_site | + | 28820  | 28820  | -1555 | 27177 | AN6963 |
| 2048 | CONTIG116 | 30392 | 30652 | 1.35 | 3.70E-02 | transcription_start_site | - | 31384  | 31384  | 862   | 27178 | AN6964 |
| 879  | CONTIG117 | 6393  | 6667  | 2.02 | 8.81E-03 | transcription_start_site | - | 6352   | 6352   | -178  | 27202 | AN6973 |
| 879  | CONTIG117 | 6393  | 6667  | 2.02 | 8.81E-03 | transcription_start_site | - | 6273   | 6273   | -257  | 27203 | AN6973 |
| 879  | CONTIG117 | 6393  | 6667  | 2.02 | 8.81E-03 | transcription_start_site | - | 5972   | 5972   | -558  | 27204 | AN6973 |
| 879  | CONTIG117 | 6393  | 6667  | 2.02 | 8.81E-03 | transcription_start_site | - | 5826   | 5826   | -704  | 27205 | AN6973 |
| 879  | CONTIG117 | 6393  | 6667  | 2.02 | 8.81E-03 | transcription_start_site | + | 10913  | 10913  | -4383 | 27206 | AN6974 |
| 879  | CONTIG117 | 6393  | 6667  | 2.02 | 8.81E-03 | transcription_start_site | + | 11002  | 11002  | -4472 | 27207 | AN6974 |
| 879  | CONTIG117 | 6393  | 6667  | 2.02 | 8.81E-03 | transcription_start_site | + | 11331  | 11331  | -4801 | 27208 | AN6974 |
| 577  | CONTIG117 | 39976 | 40401 | 2.34 | 2.22E-03 | transcription_start_site | - | 38265  | 38265  | -1923 | 27246 | AN6980 |
| 577  | CONTIG117 | 39976 | 40401 | 2.34 | 2.22E-03 | transcription_start_site | - | 37737  | 37737  | -2451 | 27247 | AN6980 |
| 577  | CONTIG117 | 39976 | 40401 | 2.34 | 2.22E-03 | transcription_start_site | - | 37040  | 37040  | -3148 | 27248 | AN6980 |
| 577  | CONTIG117 | 39976 | 40401 | 2.34 | 2.22E-03 | transcription_start_site | - | 36010  | 36010  | -4178 | 27249 | AN6980 |
| 577  | CONTIG117 | 39976 | 40401 | 2.34 | 2.22E-03 | transcription_start_site | - | 35201  | 35201  | -4987 | 27250 | AN6980 |
| 577  | CONTIG117 | 39976 | 40401 | 2.34 | 2.22E-03 | transcription_start_site | + | 40816  | 40816  | -627  | 27251 | AN6982 |
| 577  | CONTIG117 | 39976 | 40401 | 2.34 | 2.22E-03 | transcription_start_site | + | 41367  | 41367  | -1178 | 27252 | AN6982 |
| 577  | CONTIG117 | 39976 | 40401 | 2.34 | 2.22E-03 | transcription_start_site | + | 42331  | 42331  | -2142 | 27253 | AN6982 |
| 577  | CONTIG117 | 39976 | 40401 | 2.34 | 2.22E-03 | transcription_start_site | + | 43432  | 43432  | -3243 | 27254 | AN6983 |
| 2542 | CONTIG117 | 84843 | 85192 | 1.19 | 1.66E-01 | transcription_start_site | - | 85108  | 85108  | 90    | 27288 | AN6998 |
| 2542 | CONTIG117 | 84843 | 85192 | 1.19 | 1.66E-01 | transcription_start_site | - | 84647  | 84647  | -370  | 27289 | AN6998 |
| 2542 | CONTIG117 | 84843 | 85192 | 1.19 | 1.66E-01 | transcription_start_site | - | 84545  | 84545  | -472  | 27290 | AN6998 |
| 2542 | CONTIG117 | 84843 | 85192 | 1.19 | 1.66E-01 | transcription_start_site | - | 84275  | 84275  | -742  | 27291 | AN6998 |
| 2542 | CONTIG117 | 84843 | 85192 | 1.19 | 1.66E-01 | transcription_start_site | - | 84037  | 84037  | -980  | 27292 | AN6998 |
| 2542 | CONTIG117 | 84843 | 85192 | 1.19 | 1.66E-01 | transcription_start_site | - | 83921  | 83921  | -1096 | 27293 | AN6998 |
| 1159 | CONTIG117 | 98405 | 98679 | 1.79 | 2.12E-02 | transcription_start_site | - | 95748  | 95748  | -2794 | 27307 | AN7003 |
| 1159 | CONTIG117 | 98405 | 98679 | 1.79 | 2.12E-02 | transcription_start_site | - | 95638  | 95638  | -2904 | 27308 | AN7003 |
| 1159 | CONTIG117 | 98405 | 98679 | 1.79 | 2.12E-02 | transcription_start_site | - | 95484  | 95484  | -3058 | 27309 | AN7003 |
| 1159 | CONTIG117 | 98405 | 98679 | 1.79 | 2.12E-02 | transcription_start_site | - | 95302  | 95302  | -3240 | 27310 | AN7003 |
| 1159 | CONTIG117 | 98405 | 98679 | 1.79 | 2.12E-02 | transcription_start_site | - | 95091  | 95091  | -3451 | 27311 | AN7003 |
| 1159 | CONTIG117 | 98405 | 98679 | 1.79 | 2.12E-02 | transcription_start_site | - | 98638  | 98638  | 96    | 27312 | AN7004 |
| 1159 | CONTIG117 | 98405 | 98679 | 1.79 | 2.12E-02 | transcription_start_site | - | 98082  | 98082  | -460  | 27313 | AN7004 |

|      |           |        |        |      |          |                          |   |        |        |       |       |        |
|------|-----------|--------|--------|------|----------|--------------------------|---|--------|--------|-------|-------|--------|
| 1159 | CONTIG117 | 98405  | 98679  | 1.79 | 2.12E-02 | transcription_start_site | - | 97956  | 97956  | -586  | 27314 | AN7004 |
| 1159 | CONTIG117 | 98405  | 98679  | 1.79 | 2.12E-02 | transcription_start_site | + | 99437  | 99437  | -895  | 27315 | AN7005 |
| 696  | CONTIG117 | 121671 | 121945 | 2.2  | 4.61E-03 | transcription_start_site | - | 118295 | 118295 | -3513 | 27332 | AN7012 |
| 696  | CONTIG117 | 121671 | 121945 | 2.2  | 4.61E-03 | transcription_start_site | - | 117493 | 117493 | -4315 | 27333 | AN7012 |
| 696  | CONTIG117 | 121671 | 121945 | 2.2  | 4.61E-03 | transcription_start_site | - | 116827 | 116827 | -4981 | 27334 | AN7012 |
| 880  | CONTIG117 | 120826 | 121265 | 2.02 | 8.81E-03 | transcription_start_site | - | 118295 | 118295 | -2750 | 27332 | AN7012 |
| 880  | CONTIG117 | 120826 | 121265 | 2.02 | 8.81E-03 | transcription_start_site | - | 117493 | 117493 | -3552 | 27333 | AN7012 |
| 880  | CONTIG117 | 120826 | 121265 | 2.02 | 8.81E-03 | transcription_start_site | - | 116827 | 116827 | -4218 | 27334 | AN7012 |
| 880  | CONTIG117 | 120826 | 121265 | 2.02 | 8.81E-03 | transcription_start_site | - | 116394 | 116394 | -4651 | 27335 | AN7012 |
| 696  | CONTIG117 | 121671 | 121945 | 2.2  | 4.61E-03 | transcription_start_site | + | 126275 | 126275 | -4467 | 27343 | AN7014 |
| 696  | CONTIG117 | 121671 | 121945 | 2.2  | 4.61E-03 | transcription_start_site | + | 126565 | 126565 | -4757 | 27344 | AN7014 |
| 696  | CONTIG117 | 121671 | 121945 | 2.2  | 4.61E-03 | transcription_start_site | + | 126715 | 126715 | -4907 | 27345 | AN7014 |
| 746  | CONTIG117 | 139201 | 139630 | 2.16 | 5.20E-03 | transcription_start_site | - | 138884 | 138884 | -531  | 27355 | AN7017 |
| 1296 | CONTIG117 | 141603 | 141892 | 1.7  | 3.08E-02 | transcription_start_site | - | 138884 | 138884 | -2863 | 27355 | AN7017 |
| 746  | CONTIG117 | 139201 | 139630 | 2.16 | 5.20E-03 | transcription_start_site | + | 140564 | 140564 | -1148 | 27356 | AN7018 |
| 746  | CONTIG117 | 139201 | 139630 | 2.16 | 5.20E-03 | transcription_start_site | + | 141628 | 141628 | -2212 | 27357 | AN7019 |
| 1296 | CONTIG117 | 141603 | 141892 | 1.7  | 3.08E-02 | transcription_start_site | + | 141628 | 141628 | 119   | 27357 | AN7019 |
| 544  | CONTIG117 | 152563 | 152827 | 2.39 | 1.80E-03 | transcription_start_site | + | 153628 | 153628 | -933  | 27360 | AN7021 |
| 544  | CONTIG117 | 152563 | 152827 | 2.39 | 1.80E-03 | transcription_start_site | + | 153883 | 153883 | -1188 | 27361 | AN7021 |
| 544  | CONTIG117 | 152563 | 152827 | 2.39 | 1.80E-03 | transcription_start_site | + | 154009 | 154009 | -1314 | 27362 | AN7021 |
| 544  | CONTIG117 | 152563 | 152827 | 2.39 | 1.80E-03 | transcription_start_site | + | 154223 | 154223 | -1528 | 27363 | AN7021 |
| 544  | CONTIG117 | 152563 | 152827 | 2.39 | 1.80E-03 | transcription_start_site | + | 154422 | 154422 | -1727 | 27364 | AN7021 |
| 544  | CONTIG117 | 152563 | 152827 | 2.39 | 1.80E-03 | transcription_start_site | + | 155948 | 155948 | -3253 | 27365 | AN7022 |
| 544  | CONTIG117 | 152563 | 152827 | 2.39 | 1.80E-03 | transcription_start_site | + | 156380 | 156380 | -3685 | 27366 | AN7022 |
| 544  | CONTIG117 | 152563 | 152827 | 2.39 | 1.80E-03 | transcription_start_site | + | 157149 | 157149 | -4454 | 27367 | AN7022 |
| 544  | CONTIG117 | 152563 | 152827 | 2.39 | 1.80E-03 | transcription_start_site | + | 157636 | 157636 | -4941 | 27368 | AN7022 |
| 544  | CONTIG117 | 152563 | 152827 | 2.39 | 1.80E-03 | transcription_start_site | + | 157803 | 157803 | -5108 | 27369 | AN7022 |
| 697  | CONTIG117 | 164118 | 164377 | 2.2  | 4.61E-03 | transcription_start_site | - | 160772 | 160772 | -3475 | 27373 | AN7023 |
| 697  | CONTIG117 | 164118 | 164377 | 2.2  | 4.61E-03 | transcription_start_site | - | 160307 | 160307 | -3940 | 27374 | AN7023 |
| 1235 | CONTIG117 | 165618 | 165891 | 1.74 | 2.62E-02 | transcription_start_site | - | 160772 | 160772 | -4982 | 27373 | AN7023 |
| 1776 | CONTIG117 | 162393 | 162727 | 1.47 | 6.84E-02 | transcription_start_site | - | 160772 | 160772 | -1788 | 27373 | AN7023 |
| 1776 | CONTIG117 | 162393 | 162727 | 1.47 | 6.84E-02 | transcription_start_site | - | 160307 | 160307 | -2253 | 27374 | AN7023 |
| 37   | CONTIG117 | 166963 | 167377 | 3.49 | 0.00E+00 | transcription_start_site | - | 162088 | 162088 | -5082 | 27375 | AN7024 |
| 697  | CONTIG117 | 164118 | 164377 | 2.2  | 4.61E-03 | transcription_start_site | - | 162088 | 162088 | -2159 | 27375 | AN7024 |
| 697  | CONTIG117 | 164118 | 164377 | 2.2  | 4.61E-03 | transcription_start_site | - | 161941 | 161941 | -2306 | 27376 | AN7024 |
| 697  | CONTIG117 | 164118 | 164377 | 2.2  | 4.61E-03 | transcription_start_site | - | 161773 | 161773 | -2474 | 27377 | AN7024 |
| 1235 | CONTIG117 | 165618 | 165891 | 1.74 | 2.62E-02 | transcription_start_site | - | 162088 | 162088 | -3666 | 27375 | AN7024 |
| 1235 | CONTIG117 | 165618 | 165891 | 1.74 | 2.62E-02 | transcription_start_site | - | 161941 | 161941 | -3813 | 27376 | AN7024 |
| 1235 | CONTIG117 | 165618 | 165891 | 1.74 | 2.62E-02 | transcription_start_site | - | 161773 | 161773 | -3981 | 27377 | AN7024 |
| 1776 | CONTIG117 | 162393 | 162727 | 1.47 | 6.84E-02 | transcription_start_site | - | 162088 | 162088 | -472  | 27375 | AN7024 |
| 1776 | CONTIG117 | 162393 | 162727 | 1.47 | 6.84E-02 | transcription_start_site | - | 161941 | 161941 | -619  | 27376 | AN7024 |
| 1776 | CONTIG117 | 162393 | 162727 | 1.47 | 6.84E-02 | transcription_start_site | - | 161773 | 161773 | -787  | 27377 | AN7024 |
| 697  | CONTIG117 | 164118 | 164377 | 2.2  | 4.61E-03 | transcription_start_site | + | 164543 | 164543 | -295  | 27378 | AN7025 |
| 697  | CONTIG117 | 164118 | 164377 | 2.2  | 4.61E-03 | transcription_start_site | + | 165046 | 165046 | -798  | 27379 | AN7025 |
| 697  | CONTIG117 | 164118 | 164377 | 2.2  | 4.61E-03 | transcription_start_site | + | 165604 | 165604 | -1356 | 27380 | AN7025 |
| 1235 | CONTIG117 | 165618 | 165891 | 1.74 | 2.62E-02 | transcription_start_site | + | 165604 | 165604 | 150   | 27380 | AN7025 |
| 1235 | CONTIG117 | 165618 | 165891 | 1.74 | 2.62E-02 | transcription_start_site | + | 165046 | 165046 | 708   | 27379 | AN7025 |
| 1776 | CONTIG117 | 162393 | 162727 | 1.47 | 6.84E-02 | transcription_start_site | + | 164543 | 164543 | -1983 | 27378 | AN7025 |
| 1776 | CONTIG117 | 162393 | 162727 | 1.47 | 6.84E-02 | transcription_start_site | + | 165046 | 165046 | -2486 | 27379 | AN7025 |
| 1776 | CONTIG117 | 162393 | 162727 | 1.47 | 6.84E-02 | transcription_start_site | + | 165604 | 165604 | -3044 | 27380 | AN7025 |
| 37   | CONTIG117 | 166963 | 167377 | 3.49 | 0.00E+00 | transcription_start_site | + | 168475 | 168475 | -1305 | 27381 | AN7026 |
| 37   | CONTIG117 | 166963 | 167377 | 3.49 | 0.00E+00 | transcription_start_site | + | 169566 | 169566 | -2396 | 27382 | AN7026 |
| 697  | CONTIG117 | 164118 | 164377 | 2.2  | 4.61E-03 | transcription_start_site | + | 168475 | 168475 | -4227 | 27381 | AN7026 |
| 1235 | CONTIG117 | 165618 | 165891 | 1.74 | 2.62E-02 | transcription_start_site | + | 168475 | 168475 | -2720 | 27381 | AN7026 |
| 1235 | CONTIG117 | 165618 | 165891 | 1.74 | 2.62E-02 | transcription_start_site | + | 169566 | 169566 | -3811 | 27382 | AN7026 |
| 1675 | CONTIG117 | 181070 | 181344 | 1.51 | 5.88E-02 | transcription_start_site | - | 178261 | 178261 | -2946 | 27383 | AN7027 |
| 1675 | CONTIG117 | 181070 | 181344 | 1.51 | 5.88E-02 | transcription_start_site | - | 178145 | 178145 | -3062 | 27384 | AN7027 |

|      |           |        |        |      |          |                          |   |        |        |       |       |        |
|------|-----------|--------|--------|------|----------|--------------------------|---|--------|--------|-------|-------|--------|
| 1675 | CONTIG117 | 181070 | 181344 | 1.51 | 5.88E-02 | transcription_start_site | - | 177970 | 177970 | -3237 | 27385 | AN7027 |
| 1675 | CONTIG117 | 181070 | 181344 | 1.51 | 5.88E-02 | transcription_start_site | - | 177849 | 177849 | -3358 | 27386 | AN7027 |
| 1675 | CONTIG117 | 181070 | 181344 | 1.51 | 5.88E-02 | transcription_start_site | - | 177718 | 177718 | -3489 | 27387 | AN7027 |
| 1675 | CONTIG117 | 181070 | 181344 | 1.51 | 5.88E-02 | transcription_start_site | - | 177551 | 177551 | -3656 | 27388 | AN7027 |
| 1675 | CONTIG117 | 181070 | 181344 | 1.51 | 5.88E-02 | transcription_start_site | - | 177088 | 177088 | -4119 | 27389 | AN7027 |
| 1675 | CONTIG117 | 181070 | 181344 | 1.51 | 5.88E-02 | transcription_start_site | - | 176718 | 176718 | -4489 | 27390 | AN7027 |
| 1675 | CONTIG117 | 181070 | 181344 | 1.51 | 5.88E-02 | transcription_start_site | + | 180985 | 180985 | 222   | 27398 | AN7028 |
| 1675 | CONTIG117 | 181070 | 181344 | 1.51 | 5.88E-02 | transcription_start_site | + | 180449 | 180449 | 758   | 27397 | AN7028 |
| 1675 | CONTIG117 | 181070 | 181344 | 1.51 | 5.88E-02 | transcription_start_site | + | 180213 | 180213 | 994   | 27396 | AN7028 |
| 1675 | CONTIG117 | 181070 | 181344 | 1.51 | 5.88E-02 | transcription_start_site | + | 180107 | 180107 | 1100  | 27395 | AN7028 |
| 112  | CONTIG117 | 186002 | 186438 | 3.17 | 0.00E+00 | transcription_start_site | - | 185691 | 185691 | -529  | 27399 | AN7029 |
| 112  | CONTIG117 | 186002 | 186438 | 3.17 | 0.00E+00 | transcription_start_site | - | 184839 | 184839 | -1381 | 27400 | AN7029 |
| 112  | CONTIG117 | 186002 | 186438 | 3.17 | 0.00E+00 | transcription_start_site | - | 184259 | 184259 | -1961 | 27401 | AN7029 |
| 112  | CONTIG117 | 186002 | 186438 | 3.17 | 0.00E+00 | transcription_start_site | - | 183569 | 183569 | -2651 | 27402 | AN7029 |
| 112  | CONTIG117 | 186002 | 186438 | 3.17 | 0.00E+00 | transcription_start_site | - | 183368 | 183368 | -2852 | 27403 | AN7029 |
| 127  | CONTIG117 | 190132 | 190476 | 3.12 | 0.00E+00 | transcription_start_site | - | 185691 | 185691 | -4613 | 27399 | AN7029 |
| 272  | CONTIG117 | 189152 | 189431 | 2.8  | 2.39E-04 | transcription_start_site | - | 185691 | 185691 | -3600 | 27399 | AN7029 |
| 272  | CONTIG117 | 189152 | 189431 | 2.8  | 2.39E-04 | transcription_start_site | - | 184839 | 184839 | -4452 | 27400 | AN7029 |
| 272  | CONTIG117 | 189152 | 189431 | 2.8  | 2.39E-04 | transcription_start_site | - | 184259 | 184259 | -5032 | 27401 | AN7029 |
| 825  | CONTIG117 | 186617 | 187492 | 2.07 | 7.85E-03 | transcription_start_site | - | 185691 | 185691 | -1363 | 27399 | AN7029 |
| 825  | CONTIG117 | 186617 | 187492 | 2.07 | 7.85E-03 | transcription_start_site | - | 184839 | 184839 | -2215 | 27400 | AN7029 |
| 825  | CONTIG117 | 186617 | 187492 | 2.07 | 7.85E-03 | transcription_start_site | - | 184259 | 184259 | -2795 | 27401 | AN7029 |
| 825  | CONTIG117 | 186617 | 187492 | 2.07 | 7.85E-03 | transcription_start_site | - | 183569 | 183569 | -3485 | 27402 | AN7029 |
| 825  | CONTIG117 | 186617 | 187492 | 2.07 | 7.85E-03 | transcription_start_site | - | 183368 | 183368 | -3686 | 27403 | AN7029 |
| 127  | CONTIG117 | 190132 | 190476 | 3.12 | 0.00E+00 | transcription_start_site | - | 188827 | 188827 | -1477 | 27404 | AN7030 |
| 127  | CONTIG117 | 190132 | 190476 | 3.12 | 0.00E+00 | transcription_start_site | - | 188696 | 188696 | -1608 | 27405 | AN7030 |
| 127  | CONTIG117 | 190132 | 190476 | 3.12 | 0.00E+00 | transcription_start_site | - | 188420 | 188420 | -1884 | 27406 | AN7030 |
| 127  | CONTIG117 | 190132 | 190476 | 3.12 | 0.00E+00 | transcription_start_site | - | 187596 | 187596 | -2708 | 27407 | AN7030 |
| 272  | CONTIG117 | 189152 | 189431 | 2.8  | 2.39E-04 | transcription_start_site | - | 188827 | 188827 | -464  | 27404 | AN7030 |
| 272  | CONTIG117 | 189152 | 189431 | 2.8  | 2.39E-04 | transcription_start_site | - | 188696 | 188696 | -595  | 27405 | AN7030 |
| 272  | CONTIG117 | 189152 | 189431 | 2.8  | 2.39E-04 | transcription_start_site | - | 188420 | 188420 | -871  | 27406 | AN7030 |
| 272  | CONTIG117 | 189152 | 189431 | 2.8  | 2.39E-04 | transcription_start_site | - | 187596 | 187596 | -1695 | 27407 | AN7030 |
| 825  | CONTIG117 | 186617 | 187492 | 2.07 | 7.85E-03 | transcription_start_site | - | 187596 | 187596 | 541   | 27407 | AN7030 |
| 825  | CONTIG117 | 186617 | 187492 | 2.07 | 7.85E-03 | transcription_start_site | - | 188420 | 188420 | 1365  | 27406 | AN7030 |
| 127  | CONTIG117 | 190132 | 190476 | 3.12 | 0.00E+00 | transcription_start_site | - | 191473 | 191473 | 1169  | 27411 | AN7031 |
| 2646 | CONTIG117 | 200478 | 200752 | 1.15 | 1.93E-01 | transcription_start_site | - | 196686 | 196686 | -3929 | 27412 | AN7032 |
| 2646 | CONTIG117 | 200478 | 200752 | 1.15 | 1.93E-01 | transcription_start_site | - | 199234 | 199234 | -1381 | 27416 | AN7033 |
| 2646 | CONTIG117 | 200478 | 200752 | 1.15 | 1.93E-01 | transcription_start_site | - | 199154 | 199154 | -1461 | 27417 | AN7033 |
| 2646 | CONTIG117 | 200478 | 200752 | 1.15 | 1.93E-01 | transcription_start_site | - | 198881 | 198881 | -1734 | 27418 | AN7033 |
| 2646 | CONTIG117 | 200478 | 200752 | 1.15 | 1.93E-01 | transcription_start_site | - | 198367 | 198367 | -2248 | 27419 | AN7033 |
| 2646 | CONTIG117 | 200478 | 200752 | 1.15 | 1.93E-01 | transcription_start_site | - | 201157 | 201157 | 542   | 27420 | AN7034 |
| 1676 | CONTIG117 | 221106 | 221385 | 1.51 | 5.88E-02 | transcription_start_site | - | 219033 | 219033 | -2212 | 27428 | AN7039 |
| 1676 | CONTIG117 | 221106 | 221385 | 1.51 | 5.88E-02 | transcription_start_site | - | 218681 | 218681 | -2564 | 27429 | AN7039 |
| 1676 | CONTIG117 | 221106 | 221385 | 1.51 | 5.88E-02 | transcription_start_site | - | 218205 | 218205 | -3040 | 27430 | AN7039 |
| 1676 | CONTIG117 | 221106 | 221385 | 1.51 | 5.88E-02 | transcription_start_site | - | 217993 | 217993 | -3252 | 27431 | AN7039 |
| 2543 | CONTIG117 | 222011 | 222350 | 1.19 | 1.66E-01 | transcription_start_site | - | 219033 | 219033 | -3147 | 27428 | AN7039 |
| 2543 | CONTIG117 | 222011 | 222350 | 1.19 | 1.66E-01 | transcription_start_site | - | 218681 | 218681 | -3499 | 27429 | AN7039 |
| 2543 | CONTIG117 | 222011 | 222350 | 1.19 | 1.66E-01 | transcription_start_site | - | 218205 | 218205 | -3975 | 27430 | AN7039 |
| 2543 | CONTIG117 | 222011 | 222350 | 1.19 | 1.66E-01 | transcription_start_site | - | 217993 | 217993 | -4187 | 27431 | AN7039 |
| 2544 | CONTIG117 | 222831 | 223195 | 1.19 | 1.66E-01 | transcription_start_site | - | 219033 | 219033 | -3980 | 27428 | AN7039 |
| 2544 | CONTIG117 | 222831 | 223195 | 1.19 | 1.66E-01 | transcription_start_site | - | 218681 | 218681 | -4332 | 27429 | AN7039 |
| 2544 | CONTIG117 | 222831 | 223195 | 1.19 | 1.66E-01 | transcription_start_site | - | 218205 | 218205 | -4808 | 27430 | AN7039 |
| 2544 | CONTIG117 | 222831 | 223195 | 1.19 | 1.66E-01 | transcription_start_site | - | 217993 | 217993 | -5020 | 27431 | AN7039 |
| 1676 | CONTIG117 | 221106 | 221385 | 1.51 | 5.88E-02 | transcription_start_site | + | 220437 | 220437 | 808   | 27435 | AN7040 |
| 1676 | CONTIG117 | 221106 | 221385 | 1.51 | 5.88E-02 | transcription_start_site | + | 220184 | 220184 | 1061  | 27434 | AN7040 |
| 1676 | CONTIG117 | 221106 | 221385 | 1.51 | 5.88E-02 | transcription_start_site | + | 223741 | 223741 | -2495 | 27436 | AN7041 |
| 2543 | CONTIG117 | 222011 | 222350 | 1.19 | 1.66E-01 | transcription_start_site | + | 223741 | 223741 | -1560 | 27436 | AN7041 |



|      |           |        |        |      |          |                          |   |        |        |       |       |        |
|------|-----------|--------|--------|------|----------|--------------------------|---|--------|--------|-------|-------|--------|
| 2544 | CONTIG117 | 222831 | 223195 | 1.19 | 1.66E-01 | transcription_start_site | + | 223741 | 223741 | -728  | 27436 | AN7041 |
| 1671 | CONTIG117 | 228240 | 228879 | 1.51 | 3.99E-02 | transcription_start_site | - | 228231 | 228231 | -328  | 27437 | AN7042 |
| 1671 | CONTIG117 | 228240 | 228879 | 1.51 | 3.99E-02 | transcription_start_site | - | 227947 | 227947 | -612  | 27438 | AN7042 |
| 1671 | CONTIG117 | 228240 | 228879 | 1.51 | 3.99E-02 | transcription_start_site | - | 227325 | 227325 | -1234 | 27439 | AN7042 |
| 2227 | CONTIG117 | 230045 | 230304 | 1.29 | 1.25E-01 | transcription_start_site | - | 228231 | 228231 | -1943 | 27437 | AN7042 |
| 2227 | CONTIG117 | 230045 | 230304 | 1.29 | 1.25E-01 | transcription_start_site | - | 227947 | 227947 | -2227 | 27438 | AN7042 |
| 2227 | CONTIG117 | 230045 | 230304 | 1.29 | 1.25E-01 | transcription_start_site | - | 227325 | 227325 | -2849 | 27439 | AN7042 |
| 1671 | CONTIG117 | 228240 | 228879 | 1.51 | 3.99E-02 | transcription_start_site | + | 229889 | 229889 | -1329 | 27440 | AN7043 |
| 1671 | CONTIG117 | 228240 | 228879 | 1.51 | 3.99E-02 | transcription_start_site | + | 230388 | 230388 | -1828 | 27441 | AN7043 |
| 2227 | CONTIG117 | 230045 | 230304 | 1.29 | 1.25E-01 | transcription_start_site | + | 230388 | 230388 | -213  | 27441 | AN7043 |
| 2227 | CONTIG117 | 230045 | 230304 | 1.29 | 1.25E-01 | transcription_start_site | + | 229889 | 229889 | 285   | 27440 | AN7043 |
| 1671 | CONTIG117 | 228240 | 228879 | 1.51 | 3.99E-02 | transcription_start_site | + | 230830 | 230830 | -2270 | 27442 | AN7044 |
| 1671 | CONTIG117 | 228240 | 228879 | 1.51 | 3.99E-02 | transcription_start_site | + | 230943 | 230943 | -2383 | 27443 | AN7044 |
| 1671 | CONTIG117 | 228240 | 228879 | 1.51 | 3.99E-02 | transcription_start_site | + | 231218 | 231218 | -2658 | 27444 | AN7044 |
| 1671 | CONTIG117 | 228240 | 228879 | 1.51 | 3.99E-02 | transcription_start_site | + | 231497 | 231497 | -2937 | 27445 | AN7044 |
| 1671 | CONTIG117 | 228240 | 228879 | 1.51 | 3.99E-02 | transcription_start_site | + | 232133 | 232133 | -3573 | 27446 | AN7044 |
| 2227 | CONTIG117 | 230045 | 230304 | 1.29 | 1.25E-01 | transcription_start_site | + | 230830 | 230830 | -655  | 27442 | AN7044 |
| 2227 | CONTIG117 | 230045 | 230304 | 1.29 | 1.25E-01 | transcription_start_site | + | 230943 | 230943 | -768  | 27443 | AN7044 |
| 2227 | CONTIG117 | 230045 | 230304 | 1.29 | 1.25E-01 | transcription_start_site | + | 231218 | 231218 | -1043 | 27444 | AN7044 |
| 2227 | CONTIG117 | 230045 | 230304 | 1.29 | 1.25E-01 | transcription_start_site | + | 231497 | 231497 | -1322 | 27445 | AN7044 |
| 2227 | CONTIG117 | 230045 | 230304 | 1.29 | 1.25E-01 | transcription_start_site | + | 232133 | 232133 | -1958 | 27446 | AN7044 |
| 1671 | CONTIG117 | 228240 | 228879 | 1.51 | 3.99E-02 | transcription_start_site | + | 233024 | 233024 | -4464 | 27447 | AN7045 |
| 1671 | CONTIG117 | 228240 | 228879 | 1.51 | 3.99E-02 | transcription_start_site | + | 233296 | 233296 | -4736 | 27448 | AN7045 |
| 1671 | CONTIG117 | 228240 | 228879 | 1.51 | 3.99E-02 | transcription_start_site | + | 233438 | 233438 | -4878 | 27449 | AN7045 |
| 1671 | CONTIG117 | 228240 | 228879 | 1.51 | 3.99E-02 | transcription_start_site | + | 233604 | 233604 | -5044 | 27450 | AN7045 |
| 2227 | CONTIG117 | 230045 | 230304 | 1.29 | 1.25E-01 | transcription_start_site | + | 233024 | 233024 | -2849 | 27447 | AN7045 |
| 2227 | CONTIG117 | 230045 | 230304 | 1.29 | 1.25E-01 | transcription_start_site | + | 233296 | 233296 | -3121 | 27448 | AN7045 |
| 2227 | CONTIG117 | 230045 | 230304 | 1.29 | 1.25E-01 | transcription_start_site | + | 233438 | 233438 | -3263 | 27449 | AN7045 |
| 2227 | CONTIG117 | 230045 | 230304 | 1.29 | 1.25E-01 | transcription_start_site | + | 233604 | 233604 | -3429 | 27450 | AN7045 |
| 2227 | CONTIG117 | 230045 | 230304 | 1.29 | 1.25E-01 | transcription_start_site | + | 233880 | 233880 | -3705 | 27451 | AN7045 |
| 2227 | CONTIG117 | 230045 | 230304 | 1.29 | 1.25E-01 | transcription_start_site | + | 234073 | 234073 | -3898 | 27452 | AN7045 |
| 2227 | CONTIG117 | 230045 | 230304 | 1.29 | 1.25E-01 | transcription_start_site | + | 234729 | 234729 | -4554 | 27453 | AN7045 |
| 2380 | CONTIG117 | 241364 | 241703 | 1.24 | 1.44E-01 | transcription_start_site | - | 241103 | 241103 | -430  | 27456 | AN7047 |
| 2380 | CONTIG117 | 241364 | 241703 | 1.24 | 1.44E-01 | transcription_start_site | - | 240987 | 240987 | -546  | 27457 | AN7047 |
| 2380 | CONTIG117 | 241364 | 241703 | 1.24 | 1.44E-01 | transcription_start_site | + | 241508 | 241508 | 25    | 27458 | AN7048 |
| 2380 | CONTIG117 | 241364 | 241703 | 1.24 | 1.44E-01 | transcription_start_site | + | 242448 | 242448 | -914  | 27459 | AN7048 |
| 2380 | CONTIG117 | 241364 | 241703 | 1.24 | 1.44E-01 | transcription_start_site | + | 242921 | 242921 | -1387 | 27460 | AN7048 |
| 2380 | CONTIG117 | 241364 | 241703 | 1.24 | 1.44E-01 | transcription_start_site | + | 243706 | 243706 | -2172 | 27461 | AN7049 |
| 2380 | CONTIG117 | 241364 | 241703 | 1.24 | 1.44E-01 | transcription_start_site | + | 245443 | 245443 | -3909 | 27462 | AN7049 |
| 2380 | CONTIG117 | 241364 | 241703 | 1.24 | 1.44E-01 | transcription_start_site | + | 245502 | 245502 | -3968 | 27463 | AN7049 |
| 2380 | CONTIG117 | 241364 | 241703 | 1.24 | 1.44E-01 | transcription_start_site | + | 245662 | 245662 | -4128 | 27464 | AN7049 |
| 2380 | CONTIG117 | 241364 | 241703 | 1.24 | 1.44E-01 | transcription_start_site | + | 245742 | 245742 | -4208 | 27465 | AN7049 |
| 2380 | CONTIG117 | 241364 | 241703 | 1.24 | 1.44E-01 | transcription_start_site | + | 245939 | 245939 | -4405 | 27466 | AN7049 |
| 2380 | CONTIG117 | 241364 | 241703 | 1.24 | 1.44E-01 | transcription_start_site | + | 246112 | 246112 | -4578 | 27467 | AN7049 |
| 453  | CONTIG117 | 249165 | 249439 | 2.52 | 1.01E-03 | transcription_start_site | + | 249670 | 249670 | -368  | 27468 | AN7050 |
| 453  | CONTIG117 | 249165 | 249439 | 2.52 | 1.01E-03 | transcription_start_site | + | 249994 | 249994 | -692  | 27469 | AN7050 |
| 453  | CONTIG117 | 249165 | 249439 | 2.52 | 1.01E-03 | transcription_start_site | + | 250207 | 250207 | -905  | 27470 | AN7050 |
| 453  | CONTIG117 | 249165 | 249439 | 2.52 | 1.01E-03 | transcription_start_site | + | 250327 | 250327 | -1025 | 27471 | AN7050 |
| 453  | CONTIG117 | 249165 | 249439 | 2.52 | 1.01E-03 | transcription_start_site | + | 250511 | 250511 | -1209 | 27472 | AN7050 |
| 453  | CONTIG117 | 249165 | 249439 | 2.52 | 1.01E-03 | transcription_start_site | + | 251435 | 251435 | -2133 | 27473 | AN7050 |
| 453  | CONTIG117 | 249165 | 249439 | 2.52 | 1.01E-03 | transcription_start_site | + | 251915 | 251915 | -2613 | 27474 | AN7050 |
| 453  | CONTIG117 | 249165 | 249439 | 2.52 | 1.01E-03 | transcription_start_site | + | 252147 | 252147 | -2845 | 27475 | AN7050 |
| 453  | CONTIG117 | 249165 | 249439 | 2.52 | 1.01E-03 | transcription_start_site | + | 253184 | 253184 | -3882 | 27476 | AN7050 |
| 1980 | CONTIG117 | 249755 | 250254 | 1.38 | 9.24E-02 | transcription_start_site | + | 249994 | 249994 | 10    | 27469 | AN7050 |
| 1980 | CONTIG117 | 249755 | 250254 | 1.38 | 9.24E-02 | transcription_start_site | + | 250207 | 250207 | -202  | 27470 | AN7050 |
| 1980 | CONTIG117 | 249755 | 250254 | 1.38 | 9.24E-02 | transcription_start_site | + | 250327 | 250327 | -322  | 27471 | AN7050 |
| 1980 | CONTIG117 | 249755 | 250254 | 1.38 | 9.24E-02 | transcription_start_site | + | 249670 | 249670 | 334   | 27468 | AN7050 |

|                |        |        |      |          |                          |   |        |        |       |       |        |
|----------------|--------|--------|------|----------|--------------------------|---|--------|--------|-------|-------|--------|
| 1980 CONTIG117 | 249755 | 250254 | 1.38 | 9.24E-02 | transcription_start_site | + | 250511 | 250511 | -506  | 27472 | AN7050 |
| 1980 CONTIG117 | 249755 | 250254 | 1.38 | 9.24E-02 | transcription_start_site | + | 251435 | 251435 | -1430 | 27473 | AN7050 |
| 1980 CONTIG117 | 249755 | 250254 | 1.38 | 9.24E-02 | transcription_start_site | + | 251915 | 251915 | -1910 | 27474 | AN7050 |
| 1980 CONTIG117 | 249755 | 250254 | 1.38 | 9.24E-02 | transcription_start_site | + | 252147 | 252147 | -2142 | 27475 | AN7050 |
| 1980 CONTIG117 | 249755 | 250254 | 1.38 | 9.24E-02 | transcription_start_site | + | 253184 | 253184 | -3179 | 27476 | AN7050 |
| 2209 CONTIG117 | 247514 | 248920 | 1.29 | 3.64E-02 | transcription_start_site | + | 249670 | 249670 | -1453 | 27468 | AN7050 |
| 2209 CONTIG117 | 247514 | 248920 | 1.29 | 3.64E-02 | transcription_start_site | + | 249994 | 249994 | -1777 | 27469 | AN7050 |
| 2209 CONTIG117 | 247514 | 248920 | 1.29 | 3.64E-02 | transcription_start_site | + | 250207 | 250207 | -1990 | 27470 | AN7050 |
| 2209 CONTIG117 | 247514 | 248920 | 1.29 | 3.64E-02 | transcription_start_site | + | 250327 | 250327 | -2110 | 27471 | AN7050 |
| 2209 CONTIG117 | 247514 | 248920 | 1.29 | 3.64E-02 | transcription_start_site | + | 250511 | 250511 | -2294 | 27472 | AN7050 |
| 2209 CONTIG117 | 247514 | 248920 | 1.29 | 3.64E-02 | transcription_start_site | + | 251435 | 251435 | -3218 | 27473 | AN7050 |
| 2209 CONTIG117 | 247514 | 248920 | 1.29 | 3.64E-02 | transcription_start_site | + | 251915 | 251915 | -3698 | 27474 | AN7050 |
| 2209 CONTIG117 | 247514 | 248920 | 1.29 | 3.64E-02 | transcription_start_site | + | 252147 | 252147 | -3930 | 27475 | AN7050 |
| 2209 CONTIG117 | 247514 | 248920 | 1.29 | 3.64E-02 | transcription_start_site | + | 253184 | 253184 | -4967 | 27476 | AN7050 |
| 2228 CONTIG117 | 252545 | 252804 | 1.29 | 1.25E-01 | transcription_start_site | + | 253184 | 253184 | -509  | 27476 | AN7050 |
| 2228 CONTIG117 | 252545 | 252804 | 1.29 | 1.25E-01 | transcription_start_site | + | 252147 | 252147 | 527   | 27475 | AN7050 |
| 2228 CONTIG117 | 252545 | 252804 | 1.29 | 1.25E-01 | transcription_start_site | + | 251915 | 251915 | 759   | 27474 | AN7050 |
| 453 CONTIG117  | 249165 | 249439 | 2.52 | 1.01E-03 | transcription_start_site | + | 253860 | 253860 | -4558 | 27477 | AN7051 |
| 453 CONTIG117  | 249165 | 249439 | 2.52 | 1.01E-03 | transcription_start_site | + | 254098 | 254098 | -4796 | 27478 | AN7051 |
| 1980 CONTIG117 | 249755 | 250254 | 1.38 | 9.24E-02 | transcription_start_site | + | 253860 | 253860 | -3855 | 27477 | AN7051 |
| 1980 CONTIG117 | 249755 | 250254 | 1.38 | 9.24E-02 | transcription_start_site | + | 254098 | 254098 | -4093 | 27478 | AN7051 |
| 2209 CONTIG117 | 247514 | 248920 | 1.29 | 3.64E-02 | transcription_start_site | + | 253860 | 253860 | -5643 | 27477 | AN7051 |
| 2228 CONTIG117 | 252545 | 252804 | 1.29 | 1.25E-01 | transcription_start_site | + | 253860 | 253860 | -1185 | 27477 | AN7051 |
| 2228 CONTIG117 | 252545 | 252804 | 1.29 | 1.25E-01 | transcription_start_site | + | 254098 | 254098 | -1423 | 27478 | AN7051 |
| 2228 CONTIG117 | 252545 | 252804 | 1.29 | 1.25E-01 | transcription_start_site | + | 255652 | 255652 | -2977 | 27479 | AN7052 |
| 2228 CONTIG117 | 252545 | 252804 | 1.29 | 1.25E-01 | transcription_start_site | + | 255855 | 255855 | -3180 | 27480 | AN7052 |
| 2647 CONTIG117 | 256140 | 256409 | 1.15 | 1.93E-01 | transcription_start_site | + | 255855 | 255855 | 419   | 27480 | AN7052 |
| 2647 CONTIG117 | 256140 | 256409 | 1.15 | 1.93E-01 | transcription_start_site | + | 255652 | 255652 | 622   | 27479 | AN7052 |
| 2228 CONTIG117 | 252545 | 252804 | 1.29 | 1.25E-01 | transcription_start_site | + | 257727 | 257727 | -5052 | 27481 | AN7053 |
| 2647 CONTIG117 | 256140 | 256409 | 1.15 | 1.93E-01 | transcription_start_site | + | 257727 | 257727 | -1452 | 27481 | AN7053 |
| 2647 CONTIG117 | 256140 | 256409 | 1.15 | 1.93E-01 | transcription_start_site | + | 257885 | 257885 | -1610 | 27482 | AN7053 |
| 2647 CONTIG117 | 256140 | 256409 | 1.15 | 1.93E-01 | transcription_start_site | + | 260142 | 260142 | -3867 | 27483 | AN7054 |
| 2647 CONTIG117 | 256140 | 256409 | 1.15 | 1.93E-01 | transcription_start_site | + | 260442 | 260442 | -4167 | 27484 | AN7054 |
| 2647 CONTIG117 | 256140 | 256409 | 1.15 | 1.93E-01 | transcription_start_site | + | 260587 | 260587 | -4312 | 27485 | AN7054 |
| 2647 CONTIG117 | 256140 | 256409 | 1.15 | 1.93E-01 | transcription_start_site | + | 260678 | 260678 | -4403 | 27486 | AN7054 |
| 2647 CONTIG117 | 256140 | 256409 | 1.15 | 1.93E-01 | transcription_start_site | + | 260860 | 260860 | -4585 | 27487 | AN7054 |
| 2647 CONTIG117 | 256140 | 256409 | 1.15 | 1.93E-01 | transcription_start_site | + | 261405 | 261405 | -5130 | 27488 | AN7054 |
| 2965 CONTIG118 | 19136  | 19402  | 0.95 | 1.66E-01 | transcription_start_site | - | 14258  | 14258  | -5011 | 27524 | AN7063 |
| 2965 CONTIG118 | 19136  | 19402  | 0.95 | 1.66E-01 | transcription_start_site | - | 15798  | 15798  | -3471 | 27531 | AN7064 |
| 2965 CONTIG118 | 19136  | 19402  | 0.95 | 1.66E-01 | transcription_start_site | - | 15263  | 15263  | -4006 | 27532 | AN7064 |
| 2965 CONTIG118 | 19136  | 19402  | 0.95 | 1.66E-01 | transcription_start_site | - | 20198  | 20198  | 929   | 27537 | AN7066 |
| 2461 CONTIG118 | 44930  | 46254  | 1.21 | 3.99E-02 | transcription_start_site | - | 41822  | 41822  | -3770 | 27555 | AN7072 |
| 2461 CONTIG118 | 44930  | 46254  | 1.21 | 3.99E-02 | transcription_start_site | + | 44353  | 44353  | 1239  | 27557 | AN7073 |
| 2461 CONTIG118 | 44930  | 46254  | 1.21 | 3.99E-02 | transcription_start_site | - | 45756  | 45756  | 164   | 27558 | AN7074 |
| 2461 CONTIG118 | 44930  | 46254  | 1.21 | 3.99E-02 | transcription_start_site | - | 44987  | 44987  | -605  | 27559 | AN7074 |
| 2461 CONTIG118 | 44930  | 46254  | 1.21 | 3.99E-02 | transcription_start_site | + | 46763  | 46763  | -1171 | 27560 | AN7075 |
| 2461 CONTIG118 | 44930  | 46254  | 1.21 | 3.99E-02 | transcription_start_site | + | 47329  | 47329  | -1737 | 27561 | AN7075 |
| 2461 CONTIG118 | 44930  | 46254  | 1.21 | 3.99E-02 | transcription_start_site | + | 47892  | 47892  | -2300 | 27562 | AN7075 |
| 2653 CONTIG118 | 51995  | 52405  | 1.14 | 6.16E-02 | transcription_start_site | + | 52988  | 52988  | -788  | 27563 | AN7076 |
| 2653 CONTIG118 | 51995  | 52405  | 1.14 | 6.16E-02 | transcription_start_site | + | 53200  | 53200  | -1000 | 27564 | AN7076 |
| 2653 CONTIG118 | 51995  | 52405  | 1.14 | 6.16E-02 | transcription_start_site | + | 53662  | 53662  | -1462 | 27565 | AN7076 |
| 2653 CONTIG118 | 51995  | 52405  | 1.14 | 6.16E-02 | transcription_start_site | + | 53854  | 53854  | -1654 | 27566 | AN7076 |
| 2027 CONTIG118 | 61371  | 62169  | 1.36 | 1.23E-02 | transcription_start_site | - | 56663  | 56663  | -5107 | 27567 | AN7077 |
| 2027 CONTIG118 | 61371  | 62169  | 1.36 | 1.23E-02 | transcription_start_site | - | 60251  | 60251  | -1519 | 27571 | AN7078 |
| 2027 CONTIG118 | 61371  | 62169  | 1.36 | 1.23E-02 | transcription_start_site | - | 59511  | 59511  | -2259 | 27572 | AN7078 |
| 2027 CONTIG118 | 61371  | 62169  | 1.36 | 1.23E-02 | transcription_start_site | - | 59296  | 59296  | -2474 | 27573 | AN7078 |
| 2027 CONTIG118 | 61371  | 62169  | 1.36 | 1.23E-02 | transcription_start_site | - | 59119  | 59119  | -2651 | 27574 | AN7078 |

|                |       |       |      |          |                          |   |        |        |       |       |        |
|----------------|-------|-------|------|----------|--------------------------|---|--------|--------|-------|-------|--------|
| 2027 CONTIG118 | 61371 | 62169 | 1.36 | 1.23E-02 | transcription_start_site | - | 58970  | 58970  | -2800 | 27575 | AN7078 |
| 2027 CONTIG118 | 61371 | 62169 | 1.36 | 1.23E-02 | transcription_start_site | - | 58801  | 58801  | -2969 | 27576 | AN7078 |
| 2027 CONTIG118 | 61371 | 62169 | 1.36 | 1.23E-02 | transcription_start_site | - | 58576  | 58576  | -3194 | 27577 | AN7078 |
| 2027 CONTIG118 | 61371 | 62169 | 1.36 | 1.23E-02 | transcription_start_site | - | 58264  | 58264  | -3506 | 27578 | AN7078 |
| 2027 CONTIG118 | 61371 | 62169 | 1.36 | 1.23E-02 | transcription_start_site | - | 58108  | 58108  | -3662 | 27579 | AN7078 |
| 2027 CONTIG118 | 61371 | 62169 | 1.36 | 1.23E-02 | transcription_start_site | - | 57790  | 57790  | -3980 | 27580 | AN7078 |
| 2027 CONTIG118 | 61371 | 62169 | 1.36 | 1.23E-02 | transcription_start_site | - | 57736  | 57736  | -4034 | 27581 | AN7078 |
| 2027 CONTIG118 | 61371 | 62169 | 1.36 | 1.23E-02 | transcription_start_site | - | 57605  | 57605  | -4165 | 27582 | AN7078 |
| 1761 CONTIG118 | 66829 | 67343 | 1.47 | 9.21E-03 | transcription_start_site | - | 66482  | 66482  | -604  | 27583 | AN7080 |
| 1761 CONTIG118 | 66829 | 67343 | 1.47 | 9.21E-03 | transcription_start_site | - | 65831  | 65831  | -1255 | 27584 | AN7080 |
| 1761 CONTIG118 | 66829 | 67343 | 1.47 | 9.21E-03 | transcription_start_site | - | 65723  | 65723  | -1363 | 27585 | AN7080 |
| 2963 CONTIG118 | 69153 | 69967 | 0.95 | 1.50E-01 | transcription_start_site | - | 66482  | 66482  | -3078 | 27583 | AN7080 |
| 2963 CONTIG118 | 69153 | 69967 | 0.95 | 1.50E-01 | transcription_start_site | - | 65831  | 65831  | -3729 | 27584 | AN7080 |
| 2963 CONTIG118 | 69153 | 69967 | 0.95 | 1.50E-01 | transcription_start_site | - | 65723  | 65723  | -3837 | 27585 | AN7080 |
| 1761 CONTIG118 | 66829 | 67343 | 1.47 | 9.21E-03 | transcription_start_site | + | 68362  | 68362  | -1276 | 27586 | AN7081 |
| 1761 CONTIG118 | 66829 | 67343 | 1.47 | 9.21E-03 | transcription_start_site | + | 68703  | 68703  | -1617 | 27587 | AN7081 |
| 1761 CONTIG118 | 66829 | 67343 | 1.47 | 9.21E-03 | transcription_start_site | + | 68966  | 68966  | -1880 | 27588 | AN7081 |
| 2963 CONTIG118 | 69153 | 69967 | 0.95 | 1.50E-01 | transcription_start_site | + | 68966  | 68966  | 594   | 27588 | AN7081 |
| 2963 CONTIG118 | 69153 | 69967 | 0.95 | 1.50E-01 | transcription_start_site | + | 68703  | 68703  | 857   | 27587 | AN7081 |
| 2963 CONTIG118 | 69153 | 69967 | 0.95 | 1.50E-01 | transcription_start_site | + | 68362  | 68362  | 1198  | 27586 | AN7081 |
| 875 CONTIG118  | 74403 | 74775 | 2.02 | 1.01E-03 | transcription_start_site | - | 75585  | 75585  | 996   | 27589 | AN7083 |
| 875 CONTIG118  | 74403 | 74775 | 2.02 | 1.01E-03 | transcription_start_site | + | 76197  | 76197  | -1608 | 27590 | AN7084 |
| 875 CONTIG118  | 74403 | 74775 | 2.02 | 1.01E-03 | transcription_start_site | + | 76268  | 76268  | -1679 | 27591 | AN7084 |
| 875 CONTIG118  | 74403 | 74775 | 2.02 | 1.01E-03 | transcription_start_site | + | 76533  | 76533  | -1944 | 27592 | AN7084 |
| 875 CONTIG118  | 74403 | 74775 | 2.02 | 1.01E-03 | transcription_start_site | + | 76624  | 76624  | -2035 | 27593 | AN7084 |
| 875 CONTIG118  | 74403 | 74775 | 2.02 | 1.01E-03 | transcription_start_site | + | 77143  | 77143  | -2554 | 27594 | AN7084 |
| 875 CONTIG118  | 74403 | 74775 | 2.02 | 1.01E-03 | transcription_start_site | + | 77310  | 77310  | -2721 | 27595 | AN7084 |
| 875 CONTIG118  | 74403 | 74775 | 2.02 | 1.01E-03 | transcription_start_site | + | 77913  | 77913  | -3324 | 27596 | AN7084 |
| 875 CONTIG118  | 74403 | 74775 | 2.02 | 1.01E-03 | transcription_start_site | + | 78086  | 78086  | -3497 | 27597 | AN7084 |
| 875 CONTIG118  | 74403 | 74775 | 2.02 | 1.01E-03 | transcription_start_site | + | 79040  | 79040  | -4451 | 27598 | AN7084 |
| 2863 CONTIG118 | 71778 | 72127 | 1.03 | 1.25E-01 | transcription_start_site | + | 76197  | 76197  | -4244 | 27590 | AN7084 |
| 2863 CONTIG118 | 71778 | 72127 | 1.03 | 1.25E-01 | transcription_start_site | + | 76268  | 76268  | -4315 | 27591 | AN7084 |
| 2863 CONTIG118 | 71778 | 72127 | 1.03 | 1.25E-01 | transcription_start_site | + | 76533  | 76533  | -4580 | 27592 | AN7084 |
| 2863 CONTIG118 | 71778 | 72127 | 1.03 | 1.25E-01 | transcription_start_site | + | 76624  | 76624  | -4671 | 27593 | AN7084 |
| 458 CONTIG118  | 85055 | 85339 | 2.5  | 0.00E+00 | transcription_start_site | - | 85565  | 85565  | 368   | 27603 | AN7085 |
| 458 CONTIG118  | 85055 | 85339 | 2.5  | 0.00E+00 | transcription_start_site | - | 85945  | 85945  | 748   | 27602 | AN7085 |
| 919 CONTIG118  | 86117 | 86601 | 1.98 | 1.22E-03 | transcription_start_site | - | 85945  | 85945  | -414  | 27602 | AN7085 |
| 919 CONTIG118  | 86117 | 86601 | 1.98 | 1.22E-03 | transcription_start_site | - | 85565  | 85565  | -794  | 27603 | AN7085 |
| 919 CONTIG118  | 86117 | 86601 | 1.98 | 1.22E-03 | transcription_start_site | - | 87191  | 87191  | 832   | 27601 | AN7085 |
| 2916 CONTIG118 | 99077 | 99816 | 0.99 | 1.28E-01 | transcription_start_site | - | 97546  | 97546  | -1900 | 27607 | AN7088 |
| 2916 CONTIG118 | 99077 | 99816 | 0.99 | 1.28E-01 | transcription_start_site | - | 96050  | 96050  | -3396 | 27608 | AN7088 |
| 2916 CONTIG118 | 99077 | 99816 | 0.99 | 1.28E-01 | transcription_start_site | - | 95929  | 95929  | -3517 | 27609 | AN7088 |
| 2998 CONTIG118 | 97652 | 98466 | 0.92 | 1.79E-01 | transcription_start_site | - | 97546  | 97546  | -513  | 27607 | AN7088 |
| 2998 CONTIG118 | 97652 | 98466 | 0.92 | 1.79E-01 | transcription_start_site | - | 96050  | 96050  | -2009 | 27608 | AN7088 |
| 2998 CONTIG118 | 97652 | 98466 | 0.92 | 1.79E-01 | transcription_start_site | - | 95929  | 95929  | -2130 | 27609 | AN7088 |
| 2916 CONTIG118 | 99077 | 99816 | 0.99 | 1.28E-01 | transcription_start_site | - | 99087  | 99087  | -359  | 27611 | AN7089 |
| 2916 CONTIG118 | 99077 | 99816 | 0.99 | 1.28E-01 | transcription_start_site | - | 100014 | 100014 | 567   | 27610 | AN7089 |
| 2916 CONTIG118 | 99077 | 99816 | 0.99 | 1.28E-01 | transcription_start_site | - | 98811  | 98811  | -635  | 27612 | AN7089 |
| 2916 CONTIG118 | 99077 | 99816 | 0.99 | 1.28E-01 | transcription_start_site | - | 97990  | 97990  | -1456 | 27613 | AN7089 |
| 2998 CONTIG118 | 97652 | 98466 | 0.92 | 1.79E-01 | transcription_start_site | - | 97990  | 97990  | -69   | 27613 | AN7089 |
| 2998 CONTIG118 | 97652 | 98466 | 0.92 | 1.79E-01 | transcription_start_site | - | 98811  | 98811  | 752   | 27612 | AN7089 |
| 2998 CONTIG118 | 97652 | 98466 | 0.92 | 1.79E-01 | transcription_start_site | - | 99087  | 99087  | 1028  | 27611 | AN7089 |
| 620 CONTIG119  | 20027 | 20316 | 2.28 | 9.51E-04 | transcription_start_site | - | 15859  | 15859  | -4312 | 27630 | AN7094 |
| 620 CONTIG119  | 20027 | 20316 | 2.28 | 9.51E-04 | transcription_start_site | - | 15424  | 15424  | -4747 | 27631 | AN7094 |
| 620 CONTIG119  | 20027 | 20316 | 2.28 | 9.51E-04 | transcription_start_site | - | 15081  | 15081  | -5090 | 27632 | AN7094 |
| 620 CONTIG119  | 20027 | 20316 | 2.28 | 9.51E-04 | transcription_start_site | - | 19553  | 19553  | -618  | 27633 | AN7095 |
| 620 CONTIG119  | 20027 | 20316 | 2.28 | 9.51E-04 | transcription_start_site | - | 18053  | 18053  | -2118 | 27634 | AN7095 |

|                |       |       |      |          |                          |   |       |       |       |       |        |
|----------------|-------|-------|------|----------|--------------------------|---|-------|-------|-------|-------|--------|
| 1857 CONTIG119 | 33828 | 34257 | 1.43 | 4.36E-02 | transcription_start_site | - | 29822 | 29822 | -4220 | 27635 | AN7097 |
| 1857 CONTIG119 | 33828 | 34257 | 1.43 | 4.36E-02 | transcription_start_site | - | 29519 | 29519 | -4523 | 27636 | AN7097 |
| 1857 CONTIG119 | 33828 | 34257 | 1.43 | 4.36E-02 | transcription_start_site | - | 29234 | 29234 | -4808 | 27637 | AN7097 |
| 1857 CONTIG119 | 33828 | 34257 | 1.43 | 4.36E-02 | transcription_start_site | - | 28960 | 28960 | -5082 | 27638 | AN7097 |
| 2319 CONTIG119 | 33018 | 33732 | 1.26 | 8.01E-02 | transcription_start_site | - | 29822 | 29822 | -3553 | 27635 | AN7097 |
| 2319 CONTIG119 | 33018 | 33732 | 1.26 | 8.01E-02 | transcription_start_site | - | 29519 | 29519 | -3856 | 27636 | AN7097 |
| 2319 CONTIG119 | 33018 | 33732 | 1.26 | 8.01E-02 | transcription_start_site | - | 29234 | 29234 | -4141 | 27637 | AN7097 |
| 2319 CONTIG119 | 33018 | 33732 | 1.26 | 8.01E-02 | transcription_start_site | - | 28960 | 28960 | -4415 | 27638 | AN7097 |
| 2319 CONTIG119 | 33018 | 33732 | 1.26 | 8.01E-02 | transcription_start_site | - | 28364 | 28364 | -5011 | 27639 | AN7097 |
| 2319 CONTIG119 | 33018 | 33732 | 1.26 | 8.01E-02 | transcription_start_site | - | 28299 | 28299 | -5076 | 27640 | AN7097 |
| 2319 CONTIG119 | 33018 | 33732 | 1.26 | 8.01E-02 | transcription_start_site | - | 28128 | 28128 | -5247 | 27641 | AN7097 |
| 1670 CONTIG119 | 34893 | 35915 | 1.51 | 3.08E-02 | transcription_start_site | - | 32020 | 32020 | -3384 | 27645 | AN7098 |
| 1670 CONTIG119 | 34893 | 35915 | 1.51 | 3.08E-02 | transcription_start_site | - | 31870 | 31870 | -3534 | 27646 | AN7098 |
| 1670 CONTIG119 | 34893 | 35915 | 1.51 | 3.08E-02 | transcription_start_site | - | 31554 | 31554 | -3850 | 27647 | AN7098 |
| 1670 CONTIG119 | 34893 | 35915 | 1.51 | 3.08E-02 | transcription_start_site | - | 31283 | 31283 | -4121 | 27648 | AN7098 |
| 1670 CONTIG119 | 34893 | 35915 | 1.51 | 3.08E-02 | transcription_start_site | - | 30942 | 30942 | -4462 | 27649 | AN7098 |
| 1764 CONTIG119 | 36228 | 37402 | 1.47 | 2.18E-02 | transcription_start_site | - | 32020 | 32020 | -4795 | 27645 | AN7098 |
| 1764 CONTIG119 | 36228 | 37402 | 1.47 | 2.18E-02 | transcription_start_site | - | 31870 | 31870 | -4945 | 27646 | AN7098 |
| 1764 CONTIG119 | 36228 | 37402 | 1.47 | 2.18E-02 | transcription_start_site | - | 31554 | 31554 | -5261 | 27647 | AN7098 |
| 1764 CONTIG119 | 36228 | 37402 | 1.47 | 2.18E-02 | transcription_start_site | - | 31283 | 31283 | -5532 | 27648 | AN7098 |
| 1857 CONTIG119 | 33828 | 34257 | 1.43 | 4.36E-02 | transcription_start_site | - | 32020 | 32020 | -2022 | 27645 | AN7098 |
| 1857 CONTIG119 | 33828 | 34257 | 1.43 | 4.36E-02 | transcription_start_site | - | 31870 | 31870 | -2172 | 27646 | AN7098 |
| 1857 CONTIG119 | 33828 | 34257 | 1.43 | 4.36E-02 | transcription_start_site | - | 31554 | 31554 | -2488 | 27647 | AN7098 |
| 1857 CONTIG119 | 33828 | 34257 | 1.43 | 4.36E-02 | transcription_start_site | - | 31283 | 31283 | -2759 | 27648 | AN7098 |
| 1857 CONTIG119 | 33828 | 34257 | 1.43 | 4.36E-02 | transcription_start_site | - | 30942 | 30942 | -3100 | 27649 | AN7098 |
| 2319 CONTIG119 | 33018 | 33732 | 1.26 | 8.01E-02 | transcription_start_site | - | 32020 | 32020 | -1355 | 27645 | AN7098 |
| 2319 CONTIG119 | 33018 | 33732 | 1.26 | 8.01E-02 | transcription_start_site | - | 31870 | 31870 | -1505 | 27646 | AN7098 |
| 2319 CONTIG119 | 33018 | 33732 | 1.26 | 8.01E-02 | transcription_start_site | - | 31554 | 31554 | -1821 | 27647 | AN7098 |
| 2319 CONTIG119 | 33018 | 33732 | 1.26 | 8.01E-02 | transcription_start_site | - | 31283 | 31283 | -2092 | 27648 | AN7098 |
| 2319 CONTIG119 | 33018 | 33732 | 1.26 | 8.01E-02 | transcription_start_site | - | 30942 | 30942 | -2433 | 27649 | AN7098 |
| 1857 CONTIG119 | 33828 | 34257 | 1.43 | 4.36E-02 | transcription_start_site | + | 33194 | 33194 | 848   | 27651 | AN7099 |
| 2319 CONTIG119 | 33018 | 33732 | 1.26 | 8.01E-02 | transcription_start_site | + | 33194 | 33194 | 181   | 27651 | AN7099 |
| 2319 CONTIG119 | 33018 | 33732 | 1.26 | 8.01E-02 | transcription_start_site | + | 32757 | 32757 | 618   | 27650 | AN7099 |
| 591 CONTIG119  | 44183 | 44469 | 2.32 | 8.69E-04 | transcription_start_site | - | 42285 | 42285 | -2041 | 27652 | AN7101 |
| 591 CONTIG119  | 44183 | 44469 | 2.32 | 8.69E-04 | transcription_start_site | - | 42115 | 42115 | -2211 | 27653 | AN7101 |
| 591 CONTIG119  | 44183 | 44469 | 2.32 | 8.69E-04 | transcription_start_site | - | 41447 | 41447 | -2879 | 27654 | AN7101 |
| 643 CONTIG119  | 43208 | 43632 | 2.24 | 0.00E+00 | transcription_start_site | - | 42285 | 42285 | -1135 | 27652 | AN7101 |
| 643 CONTIG119  | 43208 | 43632 | 2.24 | 0.00E+00 | transcription_start_site | - | 42115 | 42115 | -1305 | 27653 | AN7101 |
| 643 CONTIG119  | 43208 | 43632 | 2.24 | 0.00E+00 | transcription_start_site | - | 41447 | 41447 | -1973 | 27654 | AN7101 |
| 591 CONTIG119  | 44183 | 44469 | 2.32 | 8.69E-04 | transcription_start_site | - | 44063 | 44063 | -263  | 27655 | AN7102 |
| 591 CONTIG119  | 44183 | 44469 | 2.32 | 8.69E-04 | transcription_start_site | - | 43706 | 43706 | -620  | 27656 | AN7102 |
| 591 CONTIG119  | 44183 | 44469 | 2.32 | 8.69E-04 | transcription_start_site | - | 43534 | 43534 | -792  | 27657 | AN7102 |
| 643 CONTIG119  | 43208 | 43632 | 2.24 | 0.00E+00 | transcription_start_site | - | 43534 | 43534 | 114   | 27657 | AN7102 |
| 643 CONTIG119  | 43208 | 43632 | 2.24 | 0.00E+00 | transcription_start_site | - | 43706 | 43706 | 286   | 27656 | AN7102 |
| 643 CONTIG119  | 43208 | 43632 | 2.24 | 0.00E+00 | transcription_start_site | - | 44063 | 44063 | 643   | 27655 | AN7102 |
| 591 CONTIG119  | 44183 | 44469 | 2.32 | 8.69E-04 | transcription_start_site | - | 45004 | 45004 | 678   | 27662 | AN7103 |
| 591 CONTIG119  | 44183 | 44469 | 2.32 | 8.69E-04 | transcription_start_site | - | 45177 | 45177 | 851   | 27661 | AN7103 |
| 2320 CONTIG119 | 50338 | 50767 | 1.26 | 8.01E-02 | transcription_start_site | - | 49012 | 49012 | -1540 | 27658 | AN7103 |
| 2320 CONTIG119 | 50338 | 50767 | 1.26 | 8.01E-02 | transcription_start_site | - | 48802 | 48802 | -1750 | 27659 | AN7103 |
| 2320 CONTIG119 | 50338 | 50767 | 1.26 | 8.01E-02 | transcription_start_site | - | 48675 | 48675 | -1877 | 27660 | AN7103 |
| 2875 CONTIG119 | 49213 | 49477 | 1.02 | 1.93E-01 | transcription_start_site | - | 49012 | 49012 | -333  | 27658 | AN7103 |
| 2875 CONTIG119 | 49213 | 49477 | 1.02 | 1.93E-01 | transcription_start_site | - | 48802 | 48802 | -543  | 27659 | AN7103 |
| 2875 CONTIG119 | 49213 | 49477 | 1.02 | 1.93E-01 | transcription_start_site | - | 48675 | 48675 | -670  | 27660 | AN7103 |
| 2875 CONTIG119 | 49213 | 49477 | 1.02 | 1.93E-01 | transcription_start_site | - | 45177 | 45177 | -4168 | 27661 | AN7103 |
| 2875 CONTIG119 | 49213 | 49477 | 1.02 | 1.93E-01 | transcription_start_site | - | 45004 | 45004 | -4341 | 27662 | AN7103 |
| 2320 CONTIG119 | 50338 | 50767 | 1.26 | 8.01E-02 | transcription_start_site | + | 50840 | 50840 | -287  | 27663 | AN7104 |
| 2320 CONTIG119 | 50338 | 50767 | 1.26 | 8.01E-02 | transcription_start_site | + | 51450 | 51450 | -897  | 27664 | AN7104 |

|      |           |        |        |      |          |                          |   |        |        |       |       |        |
|------|-----------|--------|--------|------|----------|--------------------------|---|--------|--------|-------|-------|--------|
| 2320 | CONTIG119 | 50338  | 50767  | 1.26 | 8.01E-02 | transcription_start_site | + | 51764  | 51764  | -1211 | 27665 | AN7104 |
| 2320 | CONTIG119 | 50338  | 50767  | 1.26 | 8.01E-02 | transcription_start_site | + | 52022  | 52022  | -1469 | 27666 | AN7104 |
| 2320 | CONTIG119 | 50338  | 50767  | 1.26 | 8.01E-02 | transcription_start_site | + | 52235  | 52235  | -1682 | 27667 | AN7104 |
| 2320 | CONTIG119 | 50338  | 50767  | 1.26 | 8.01E-02 | transcription_start_site | + | 52549  | 52549  | -1996 | 27668 | AN7104 |
| 2320 | CONTIG119 | 50338  | 50767  | 1.26 | 8.01E-02 | transcription_start_site | + | 52723  | 52723  | -2170 | 27669 | AN7104 |
| 2320 | CONTIG119 | 50338  | 50767  | 1.26 | 8.01E-02 | transcription_start_site | + | 53129  | 53129  | -2576 | 27670 | AN7104 |
| 2875 | CONTIG119 | 49213  | 49477  | 1.02 | 1.93E-01 | transcription_start_site | + | 50840  | 50840  | -1495 | 27663 | AN7104 |
| 2875 | CONTIG119 | 49213  | 49477  | 1.02 | 1.93E-01 | transcription_start_site | + | 51450  | 51450  | -2105 | 27664 | AN7104 |
| 2875 | CONTIG119 | 49213  | 49477  | 1.02 | 1.93E-01 | transcription_start_site | + | 51764  | 51764  | -2419 | 27665 | AN7104 |
| 2875 | CONTIG119 | 49213  | 49477  | 1.02 | 1.93E-01 | transcription_start_site | + | 52022  | 52022  | -2677 | 27666 | AN7104 |
| 2875 | CONTIG119 | 49213  | 49477  | 1.02 | 1.93E-01 | transcription_start_site | + | 52235  | 52235  | -2890 | 27667 | AN7104 |
| 2875 | CONTIG119 | 49213  | 49477  | 1.02 | 1.93E-01 | transcription_start_site | + | 52549  | 52549  | -3204 | 27668 | AN7104 |
| 2875 | CONTIG119 | 49213  | 49477  | 1.02 | 1.93E-01 | transcription_start_site | + | 52723  | 52723  | -3378 | 27669 | AN7104 |
| 2875 | CONTIG119 | 49213  | 49477  | 1.02 | 1.93E-01 | transcription_start_site | + | 53129  | 53129  | -3784 | 27670 | AN7104 |
| 2320 | CONTIG119 | 50338  | 50767  | 1.26 | 8.01E-02 | transcription_start_site | + | 55526  | 55526  | -4973 | 27671 | AN7105 |
| 2661 | CONTIG119 | 65568  | 65842  | 1.14 | 1.25E-01 | transcription_start_site | - | 63204  | 63204  | -2501 | 27679 | AN7108 |
| 2661 | CONTIG119 | 65568  | 65842  | 1.14 | 1.25E-01 | transcription_start_site | - | 62987  | 62987  | -2718 | 27680 | AN7108 |
| 2661 | CONTIG119 | 65568  | 65842  | 1.14 | 1.25E-01 | transcription_start_site | - | 62411  | 62411  | -3294 | 27681 | AN7108 |
| 2661 | CONTIG119 | 65568  | 65842  | 1.14 | 1.25E-01 | transcription_start_site | - | 62320  | 62320  | -3385 | 27682 | AN7108 |
| 2661 | CONTIG119 | 65568  | 65842  | 1.14 | 1.25E-01 | transcription_start_site | - | 62153  | 62153  | -3552 | 27683 | AN7108 |
| 2433 | CONTIG119 | 70808  | 71167  | 1.22 | 7.51E-02 | transcription_start_site | - | 65939  | 65939  | -5048 | 27684 | AN7109 |
| 2661 | CONTIG119 | 65568  | 65842  | 1.14 | 1.25E-01 | transcription_start_site | - | 65939  | 65939  | 234   | 27684 | AN7109 |
| 2661 | CONTIG119 | 65568  | 65842  | 1.14 | 1.25E-01 | transcription_start_site | + | 67016  | 67016  | -1311 | 27685 | AN7110 |
| 2661 | CONTIG119 | 65568  | 65842  | 1.14 | 1.25E-01 | transcription_start_site | + | 67193  | 67193  | -1488 | 27686 | AN7110 |
| 2433 | CONTIG119 | 70808  | 71167  | 1.22 | 7.51E-02 | transcription_start_site | + | 70497  | 70497  | 490   | 27693 | AN7111 |
| 2433 | CONTIG119 | 70808  | 71167  | 1.22 | 7.51E-02 | transcription_start_site | + | 70039  | 70039  | 948   | 27692 | AN7111 |
| 2661 | CONTIG119 | 65568  | 65842  | 1.14 | 1.25E-01 | transcription_start_site | + | 68818  | 68818  | -3113 | 27687 | AN7111 |
| 2661 | CONTIG119 | 65568  | 65842  | 1.14 | 1.25E-01 | transcription_start_site | + | 69041  | 69041  | -3336 | 27688 | AN7111 |
| 2661 | CONTIG119 | 65568  | 65842  | 1.14 | 1.25E-01 | transcription_start_site | + | 69318  | 69318  | -3613 | 27689 | AN7111 |
| 2661 | CONTIG119 | 65568  | 65842  | 1.14 | 1.25E-01 | transcription_start_site | + | 69471  | 69471  | -3766 | 27690 | AN7111 |
| 2661 | CONTIG119 | 65568  | 65842  | 1.14 | 1.25E-01 | transcription_start_site | + | 69606  | 69606  | -3901 | 27691 | AN7111 |
| 2661 | CONTIG119 | 65568  | 65842  | 1.14 | 1.25E-01 | transcription_start_site | + | 70039  | 70039  | -4334 | 27692 | AN7111 |
| 2661 | CONTIG119 | 65568  | 65842  | 1.14 | 1.25E-01 | transcription_start_site | + | 70497  | 70497  | -4792 | 27693 | AN7111 |
| 2433 | CONTIG119 | 70808  | 71167  | 1.22 | 7.51E-02 | transcription_start_site | + | 74837  | 74837  | -3849 | 27700 | AN7113 |
| 2433 | CONTIG119 | 70808  | 71167  | 1.22 | 7.51E-02 | transcription_start_site | + | 75089  | 75089  | -4101 | 27701 | AN7113 |
| 2433 | CONTIG119 | 70808  | 71167  | 1.22 | 7.51E-02 | transcription_start_site | + | 75980  | 75980  | -4992 | 27702 | AN7113 |
| 644  | CONTIG119 | 122643 | 123142 | 2.24 | 0.00E+00 | transcription_start_site | - | 121456 | 121456 | -1436 | 27733 | AN7123 |
| 644  | CONTIG119 | 122643 | 123142 | 2.24 | 0.00E+00 | transcription_start_site | - | 122928 | 122928 | 35    | 27735 | AN7124 |
| 644  | CONTIG119 | 122643 | 123142 | 2.24 | 0.00E+00 | transcription_start_site | - | 122832 | 122832 | -60   | 27736 | AN7124 |
| 644  | CONTIG119 | 122643 | 123142 | 2.24 | 0.00E+00 | transcription_start_site | - | 122631 | 122631 | -261  | 27737 | AN7124 |
| 644  | CONTIG119 | 122643 | 123142 | 2.24 | 0.00E+00 | transcription_start_site | - | 123703 | 123703 | 810   | 27734 | AN7124 |
| 644  | CONTIG119 | 122643 | 123142 | 2.24 | 0.00E+00 | transcription_start_site | + | 125434 | 125434 | -2541 | 27738 | AN7125 |
| 644  | CONTIG119 | 122643 | 123142 | 2.24 | 0.00E+00 | transcription_start_site | + | 125926 | 125926 | -3033 | 27739 | AN7125 |
| 644  | CONTIG119 | 122643 | 123142 | 2.24 | 0.00E+00 | transcription_start_site | + | 126311 | 126311 | -3418 | 27740 | AN7125 |
| 1763 | CONTIG121 | 6757   | 7177   | 1.47 | 1.11E-02 | transcription_start_site | + | 5770   | 5770   | 1197  | 27745 | AN7129 |
| 1763 | CONTIG121 | 6757   | 7177   | 1.47 | 1.11E-02 | transcription_start_site | + | 7189   | 7189   | -222  | 27747 | AN7130 |
| 1763 | CONTIG121 | 6757   | 7177   | 1.47 | 1.11E-02 | transcription_start_site | + | 6722   | 6722   | 245   | 27746 | AN7130 |
| 1763 | CONTIG121 | 6757   | 7177   | 1.47 | 1.11E-02 | transcription_start_site | + | 10899  | 10899  | -3932 | 27754 | AN7132 |
| 1763 | CONTIG121 | 6757   | 7177   | 1.47 | 1.11E-02 | transcription_start_site | + | 11101  | 11101  | -4134 | 27755 | AN7132 |
| 1763 | CONTIG121 | 6757   | 7177   | 1.47 | 1.11E-02 | transcription_start_site | + | 11224  | 11224  | -4257 | 27756 | AN7132 |
| 1763 | CONTIG121 | 6757   | 7177   | 1.47 | 1.11E-02 | transcription_start_site | + | 11519  | 11519  | -4552 | 27757 | AN7132 |
| 436  | CONTIG122 | 6155   | 6446   | 2.54 | 5.20E-03 | transcription_start_site | + | 10230  | 10230  | -3929 | 27778 | AN7135 |
| 436  | CONTIG122 | 6155   | 6446   | 2.54 | 5.20E-03 | transcription_start_site | + | 10533  | 10533  | -4232 | 27779 | AN7135 |
| 436  | CONTIG122 | 6155   | 6446   | 2.54 | 5.20E-03 | transcription_start_site | + | 10678  | 10678  | -4377 | 27780 | AN7135 |
| 436  | CONTIG122 | 6155   | 6446   | 2.54 | 5.20E-03 | transcription_start_site | + | 10915  | 10915  | -4614 | 27781 | AN7135 |
| 436  | CONTIG122 | 6155   | 6446   | 2.54 | 5.20E-03 | transcription_start_site | + | 11035  | 11035  | -4734 | 27782 | AN7135 |
| 436  | CONTIG122 | 6155   | 6446   | 2.54 | 5.20E-03 | transcription_start_site | + | 11134  | 11134  | -4833 | 27783 | AN7135 |

|      |           |        |        |      |          |                          |   |        |        |       |       |        |
|------|-----------|--------|--------|------|----------|--------------------------|---|--------|--------|-------|-------|--------|
| 436  | CONTIG122 | 6155   | 6446   | 2.54 | 5.20E-03 | transcription_start_site | + | 11400  | 11400  | -5099 | 27784 | AN7135 |
| 1796 | CONTIG122 | 23785  | 24066  | 1.46 | 1.44E-01 | transcription_start_site | - | 20444  | 20444  | -3481 | 27789 | AN7137 |
| 1796 | CONTIG122 | 23785  | 24066  | 1.46 | 1.44E-01 | transcription_start_site | - | 20158  | 20158  | -3767 | 27790 | AN7137 |
| 1796 | CONTIG122 | 23785  | 24066  | 1.46 | 1.44E-01 | transcription_start_site | - | 19713  | 19713  | -4212 | 27791 | AN7137 |
| 1796 | CONTIG122 | 23785  | 24066  | 1.46 | 1.44E-01 | transcription_start_site | - | 19656  | 19656  | -4269 | 27792 | AN7137 |
| 1796 | CONTIG122 | 23785  | 24066  | 1.46 | 1.44E-01 | transcription_start_site | - | 19244  | 19244  | -4681 | 27793 | AN7137 |
| 1796 | CONTIG122 | 23785  | 24066  | 1.46 | 1.44E-01 | transcription_start_site | - | 23416  | 23416  | -509  | 27794 | AN7138 |
| 1796 | CONTIG122 | 23785  | 24066  | 1.46 | 1.44E-01 | transcription_start_site | - | 23151  | 23151  | -774  | 27795 | AN7138 |
| 1796 | CONTIG122 | 23785  | 24066  | 1.46 | 1.44E-01 | transcription_start_site | - | 22934  | 22934  | -991  | 27796 | AN7138 |
| 1796 | CONTIG122 | 23785  | 24066  | 1.46 | 1.44E-01 | transcription_start_site | - | 21821  | 21821  | -2104 | 27797 | AN7138 |
| 1796 | CONTIG122 | 23785  | 24066  | 1.46 | 1.44E-01 | transcription_start_site | + | 24109  | 24109  | -183  | 27798 | AN7139 |
| 1796 | CONTIG122 | 23785  | 24066  | 1.46 | 1.44E-01 | transcription_start_site | + | 24394  | 24394  | -468  | 27799 | AN7139 |
| 1796 | CONTIG122 | 23785  | 24066  | 1.46 | 1.44E-01 | transcription_start_site | + | 24886  | 24886  | -960  | 27800 | AN7139 |
| 1796 | CONTIG122 | 23785  | 24066  | 1.46 | 1.44E-01 | transcription_start_site | + | 28075  | 28075  | -4149 | 27804 | AN7141 |
| 1796 | CONTIG122 | 23785  | 24066  | 1.46 | 1.44E-01 | transcription_start_site | + | 28523  | 28523  | -4597 | 27805 | AN7141 |
| 1796 | CONTIG122 | 23785  | 24066  | 1.46 | 1.44E-01 | transcription_start_site | + | 29040  | 29040  | -5114 | 27806 | AN7141 |
| 1662 | CONTIG122 | 42545  | 42894  | 1.52 | 1.25E-01 | transcription_start_site | - | 43067  | 43067  | 347   | 27825 | AN7149 |
| 1662 | CONTIG122 | 42545  | 42894  | 1.52 | 1.25E-01 | transcription_start_site | - | 43234  | 43234  | 514   | 27824 | AN7149 |
| 1662 | CONTIG122 | 42545  | 42894  | 1.52 | 1.25E-01 | transcription_start_site | - | 41959  | 41959  | -760  | 27826 | AN7149 |
| 1662 | CONTIG122 | 42545  | 42894  | 1.52 | 1.25E-01 | transcription_start_site | + | 45568  | 45568  | -2848 | 27827 | AN7150 |
| 557  | CONTIG122 | 68184  | 68528  | 2.38 | 8.81E-03 | transcription_start_site | - | 65616  | 65616  | -2740 | 27842 | AN7156 |
| 557  | CONTIG122 | 68184  | 68528  | 2.38 | 8.81E-03 | transcription_start_site | + | 68697  | 68697  | -341  | 27845 | AN7158 |
| 557  | CONTIG122 | 68184  | 68528  | 2.38 | 8.81E-03 | transcription_start_site | + | 69138  | 69138  | -782  | 27846 | AN7158 |
| 905  | CONTIG122 | 71860  | 72369  | 2    | 1.81E-02 | transcription_start_site | - | 72199  | 72199  | 84    | 27848 | AN7159 |
| 905  | CONTIG122 | 71860  | 72369  | 2    | 1.81E-02 | transcription_start_site | - | 72244  | 72244  | 129   | 27847 | AN7159 |
| 905  | CONTIG122 | 71860  | 72369  | 2    | 1.81E-02 | transcription_start_site | - | 71874  | 71874  | -240  | 27849 | AN7159 |
| 905  | CONTIG122 | 71860  | 72369  | 2    | 1.81E-02 | transcription_start_site | + | 73926  | 73926  | -1811 | 27850 | AN7160 |
| 905  | CONTIG122 | 71860  | 72369  | 2    | 1.81E-02 | transcription_start_site | + | 74078  | 74078  | -1963 | 27851 | AN7160 |
| 905  | CONTIG122 | 71860  | 72369  | 2    | 1.81E-02 | transcription_start_site | + | 74220  | 74220  | -2105 | 27852 | AN7160 |
| 905  | CONTIG122 | 71860  | 72369  | 2    | 1.81E-02 | transcription_start_site | + | 74890  | 74890  | -2775 | 27853 | AN7160 |
| 905  | CONTIG122 | 71860  | 72369  | 2    | 1.81E-02 | transcription_start_site | + | 75129  | 75129  | -3014 | 27854 | AN7160 |
| 333  | CONTIG122 | 92865  | 93602  | 2.71 | 0.00E+00 | transcription_start_site | + | 93592  | 93592  | -358  | 27878 | AN7166 |
| 333  | CONTIG122 | 92865  | 93602  | 2.71 | 0.00E+00 | transcription_start_site | + | 96068  | 96068  | -2834 | 27879 | AN7167 |
| 333  | CONTIG122 | 92865  | 93602  | 2.71 | 0.00E+00 | transcription_start_site | + | 97141  | 97141  | -3907 | 27880 | AN7167 |
| 1017 | CONTIG122 | 95626  | 95978  | 1.9  | 4.36E-02 | transcription_start_site | + | 96068  | 96068  | -266  | 27879 | AN7167 |
| 1017 | CONTIG122 | 95626  | 95978  | 1.9  | 4.36E-02 | transcription_start_site | + | 97141  | 97141  | -1339 | 27880 | AN7167 |
| 1438 | CONTIG122 | 96603  | 97027  | 1.62 | 7.51E-02 | transcription_start_site | + | 97141  | 97141  | -326  | 27880 | AN7167 |
| 1438 | CONTIG122 | 96603  | 97027  | 1.62 | 7.51E-02 | transcription_start_site | + | 96068  | 96068  | 747   | 27879 | AN7167 |
| 6    | CONTIG122 | 101251 | 101600 | 3.84 | 0.00E+00 | transcription_start_site | + | 103592 | 103592 | -2166 | 27881 | AN7169 |
| 34   | CONTIG122 | 102696 | 103185 | 3.52 | 0.00E+00 | transcription_start_site | + | 103592 | 103592 | -651  | 27881 | AN7169 |
| 121  | CONTIG122 | 101866 | 102360 | 3.14 | 5.64E-04 | transcription_start_site | + | 103592 | 103592 | -1479 | 27881 | AN7169 |
| 503  | CONTIG122 | 104271 | 106175 | 2.44 | 0.00E+00 | transcription_start_site | + | 103592 | 103592 | 1631  | 27881 | AN7169 |
| 848  | CONTIG122 | 100051 | 100625 | 2.06 | 2.62E-02 | transcription_start_site | + | 103592 | 103592 | -3254 | 27881 | AN7169 |
| 34   | CONTIG122 | 102696 | 103185 | 3.52 | 0.00E+00 | transcription_start_site | + | 107836 | 107836 | -4895 | 27882 | AN7170 |
| 34   | CONTIG122 | 102696 | 103185 | 3.52 | 0.00E+00 | transcription_start_site | + | 108156 | 108156 | -5215 | 27883 | AN7170 |
| 184  | CONTIG122 | 106971 | 107315 | 2.98 | 1.01E-03 | transcription_start_site | + | 107836 | 107836 | -693  | 27882 | AN7170 |
| 184  | CONTIG122 | 106971 | 107315 | 2.98 | 1.01E-03 | transcription_start_site | + | 108156 | 108156 | -1013 | 27883 | AN7170 |
| 503  | CONTIG122 | 104271 | 106175 | 2.44 | 0.00E+00 | transcription_start_site | + | 107836 | 107836 | -2613 | 27882 | AN7170 |
| 503  | CONTIG122 | 104271 | 106175 | 2.44 | 0.00E+00 | transcription_start_site | + | 108156 | 108156 | -2933 | 27883 | AN7170 |
| 736  | CONTIG122 | 118216 | 118485 | 2.17 | 1.84E-02 | transcription_start_site | - | 113532 | 113532 | -4818 | 27884 | AN7171 |
| 736  | CONTIG122 | 118216 | 118485 | 2.17 | 1.84E-02 | transcription_start_site | - | 113392 | 113392 | -4958 | 27885 | AN7171 |
| 736  | CONTIG122 | 118216 | 118485 | 2.17 | 1.84E-02 | transcription_start_site | - | 117581 | 117581 | -769  | 27887 | AN7172 |
| 736  | CONTIG122 | 118216 | 118485 | 2.17 | 1.84E-02 | transcription_start_site | - | 117501 | 117501 | -849  | 27888 | AN7172 |
| 736  | CONTIG122 | 118216 | 118485 | 2.17 | 1.84E-02 | transcription_start_site | - | 115381 | 115381 | -2969 | 27889 | AN7172 |
| 736  | CONTIG122 | 118216 | 118485 | 2.17 | 1.84E-02 | transcription_start_site | - | 114484 | 114484 | -3866 | 27890 | AN7172 |
| 736  | CONTIG122 | 118216 | 118485 | 2.17 | 1.84E-02 | transcription_start_site | + | 119329 | 119329 | -978  | 27891 | AN7173 |
| 736  | CONTIG122 | 118216 | 118485 | 2.17 | 1.84E-02 | transcription_start_site | + | 119518 | 119518 | -1167 | 27892 | AN7173 |



|      |           |        |        |      |          |                          |   |        |        |       |       |        |
|------|-----------|--------|--------|------|----------|--------------------------|---|--------|--------|-------|-------|--------|
| 736  | CONTIG122 | 118216 | 118485 | 2.17 | 1.84E-02 | transcription_start_site | + | 121535 | 121535 | -3184 | 27893 | AN7173 |
| 737  | CONTIG122 | 127801 | 128085 | 2.17 | 1.84E-02 | transcription_start_site | - | 125572 | 125572 | -2371 | 27894 | AN7174 |
| 737  | CONTIG122 | 127801 | 128085 | 2.17 | 1.84E-02 | transcription_start_site | - | 125422 | 125422 | -2521 | 27895 | AN7174 |
| 737  | CONTIG122 | 127801 | 128085 | 2.17 | 1.84E-02 | transcription_start_site | - | 125236 | 125236 | -2707 | 27896 | AN7174 |
| 737  | CONTIG122 | 127801 | 128085 | 2.17 | 1.84E-02 | transcription_start_site | - | 125080 | 125080 | -2863 | 27897 | AN7174 |
| 737  | CONTIG122 | 127801 | 128085 | 2.17 | 1.84E-02 | transcription_start_site | - | 124948 | 124948 | -2995 | 27898 | AN7174 |
| 737  | CONTIG122 | 127801 | 128085 | 2.17 | 1.84E-02 | transcription_start_site | - | 124786 | 124786 | -3157 | 27899 | AN7174 |
| 906  | CONTIG122 | 126152 | 126725 | 2    | 1.81E-02 | transcription_start_site | - | 125572 | 125572 | -866  | 27894 | AN7174 |
| 906  | CONTIG122 | 126152 | 126725 | 2    | 1.81E-02 | transcription_start_site | - | 125422 | 125422 | -1016 | 27895 | AN7174 |
| 906  | CONTIG122 | 126152 | 126725 | 2    | 1.81E-02 | transcription_start_site | - | 125236 | 125236 | -1202 | 27896 | AN7174 |
| 906  | CONTIG122 | 126152 | 126725 | 2    | 1.81E-02 | transcription_start_site | - | 125080 | 125080 | -1358 | 27897 | AN7174 |
| 906  | CONTIG122 | 126152 | 126725 | 2    | 1.81E-02 | transcription_start_site | - | 124948 | 124948 | -1490 | 27898 | AN7174 |
| 906  | CONTIG122 | 126152 | 126725 | 2    | 1.81E-02 | transcription_start_site | - | 124786 | 124786 | -1652 | 27899 | AN7174 |
| 1249 | CONTIG122 | 130145 | 130414 | 1.73 | 6.84E-02 | transcription_start_site | - | 125572 | 125572 | -4707 | 27894 | AN7174 |
| 1249 | CONTIG122 | 130145 | 130414 | 1.73 | 6.84E-02 | transcription_start_site | - | 125422 | 125422 | -4857 | 27895 | AN7174 |
| 1249 | CONTIG122 | 130145 | 130414 | 1.73 | 6.84E-02 | transcription_start_site | - | 125236 | 125236 | -5043 | 27896 | AN7174 |
| 737  | CONTIG122 | 127801 | 128085 | 2.17 | 1.84E-02 | transcription_start_site | + | 128676 | 128676 | -733  | 27900 | AN7175 |
| 906  | CONTIG122 | 126152 | 126725 | 2    | 1.81E-02 | transcription_start_site | + | 128676 | 128676 | -2237 | 27900 | AN7175 |
| 1249 | CONTIG122 | 130145 | 130414 | 1.73 | 6.84E-02 | transcription_start_site | - | 130722 | 130722 | 442   | 27904 | AN7176 |
| 1249 | CONTIG122 | 130145 | 130414 | 1.73 | 6.84E-02 | transcription_start_site | - | 130838 | 130838 | 558   | 27903 | AN7176 |
| 1249 | CONTIG122 | 130145 | 130414 | 1.73 | 6.84E-02 | transcription_start_site | - | 131042 | 131042 | 762   | 27902 | AN7176 |
| 1249 | CONTIG122 | 130145 | 130414 | 1.73 | 6.84E-02 | transcription_start_site | - | 131296 | 131296 | 1016  | 27901 | AN7176 |
| 1663 | CONTIG122 | 132845 | 133119 | 1.52 | 1.25E-01 | transcription_start_site | - | 131296 | 131296 | -1686 | 27901 | AN7176 |
| 1663 | CONTIG122 | 132845 | 133119 | 1.52 | 1.25E-01 | transcription_start_site | - | 131042 | 131042 | -1940 | 27902 | AN7176 |
| 1663 | CONTIG122 | 132845 | 133119 | 1.52 | 1.25E-01 | transcription_start_site | - | 130838 | 130838 | -2144 | 27903 | AN7176 |
| 1663 | CONTIG122 | 132845 | 133119 | 1.52 | 1.25E-01 | transcription_start_site | - | 130722 | 130722 | -2260 | 27904 | AN7176 |
| 1663 | CONTIG122 | 132845 | 133119 | 1.52 | 1.25E-01 | transcription_start_site | - | 133086 | 133086 | 104   | 27905 | AN7177 |
| 1663 | CONTIG122 | 132845 | 133119 | 1.52 | 1.25E-01 | transcription_start_site | - | 132392 | 132392 | -590  | 27906 | AN7177 |
| 1663 | CONTIG122 | 132845 | 133119 | 1.52 | 1.25E-01 | transcription_start_site | + | 136720 | 136720 | -3738 | 27909 | AN7179 |
| 1663 | CONTIG122 | 132845 | 133119 | 1.52 | 1.25E-01 | transcription_start_site | + | 137009 | 137009 | -4027 | 27910 | AN7179 |
| 1663 | CONTIG122 | 132845 | 133119 | 1.52 | 1.25E-01 | transcription_start_site | + | 137224 | 137224 | -4242 | 27911 | AN7179 |
| 1797 | CONTIG122 | 153239 | 153508 | 1.46 | 1.44E-01 | transcription_start_site | - | 150119 | 150119 | -3254 | 27923 | AN7184 |
| 1797 | CONTIG122 | 153239 | 153508 | 1.46 | 1.44E-01 | transcription_start_site | - | 149856 | 149856 | -3517 | 27924 | AN7184 |
| 1797 | CONTIG122 | 153239 | 153508 | 1.46 | 1.44E-01 | transcription_start_site | - | 153173 | 153173 | -200  | 27925 | AN7185 |
| 1797 | CONTIG122 | 153239 | 153508 | 1.46 | 1.44E-01 | transcription_start_site | - | 152926 | 152926 | -447  | 27926 | AN7185 |
| 1797 | CONTIG122 | 153239 | 153508 | 1.46 | 1.44E-01 | transcription_start_site | - | 152103 | 152103 | -1270 | 27927 | AN7185 |
| 1797 | CONTIG122 | 153239 | 153508 | 1.46 | 1.44E-01 | transcription_start_site | - | 151705 | 151705 | -1668 | 27928 | AN7185 |
| 1797 | CONTIG122 | 153239 | 153508 | 1.46 | 1.44E-01 | transcription_start_site | + | 155571 | 155571 | -2197 | 27929 | AN7186 |
| 1797 | CONTIG122 | 153239 | 153508 | 1.46 | 1.44E-01 | transcription_start_site | + | 156193 | 156193 | -2819 | 27930 | AN7186 |
| 1248 | CONTIG122 | 169663 | 170082 | 1.73 | 5.05E-02 | transcription_start_site | + | 169430 | 169430 | 442   | 27950 | AN7191 |
| 1248 | CONTIG122 | 169663 | 170082 | 1.73 | 5.05E-02 | transcription_start_site | + | 169370 | 169370 | 502   | 27949 | AN7191 |
| 1248 | CONTIG122 | 169663 | 170082 | 1.73 | 5.05E-02 | transcription_start_site | + | 168968 | 168968 | 904   | 27948 | AN7191 |
| 1248 | CONTIG122 | 169663 | 170082 | 1.73 | 5.05E-02 | transcription_start_site | - | 170868 | 170868 | 995   | 27953 | AN7192 |
| 1538 | CONTIG122 | 171976 | 172261 | 1.57 | 1.08E-01 | transcription_start_site | - | 171903 | 171903 | -215  | 27951 | AN7192 |
| 1538 | CONTIG122 | 171976 | 172261 | 1.57 | 1.08E-01 | transcription_start_site | - | 171510 | 171510 | -608  | 27952 | AN7192 |
| 1538 | CONTIG122 | 171976 | 172261 | 1.57 | 1.08E-01 | transcription_start_site | - | 170868 | 170868 | -1250 | 27953 | AN7192 |
| 1661 | CONTIG122 | 174916 | 176395 | 1.52 | 1.09E-01 | transcription_start_site | - | 171903 | 171903 | -3752 | 27951 | AN7192 |
| 1661 | CONTIG122 | 174916 | 176395 | 1.52 | 1.09E-01 | transcription_start_site | - | 171510 | 171510 | -4145 | 27952 | AN7192 |
| 1661 | CONTIG122 | 174916 | 176395 | 1.52 | 1.09E-01 | transcription_start_site | - | 170868 | 170868 | -4787 | 27953 | AN7192 |
| 1538 | CONTIG122 | 171976 | 172261 | 1.57 | 1.08E-01 | transcription_start_site | + | 175529 | 175529 | -3410 | 27954 | AN7193 |
| 1538 | CONTIG122 | 171976 | 172261 | 1.57 | 1.08E-01 | transcription_start_site | + | 175632 | 175632 | -3513 | 27955 | AN7193 |
| 1538 | CONTIG122 | 171976 | 172261 | 1.57 | 1.08E-01 | transcription_start_site | + | 175881 | 175881 | -3762 | 27956 | AN7193 |
| 1538 | CONTIG122 | 171976 | 172261 | 1.57 | 1.08E-01 | transcription_start_site | + | 176353 | 176353 | -4234 | 27957 | AN7193 |
| 1661 | CONTIG122 | 174916 | 176395 | 1.52 | 1.09E-01 | transcription_start_site | + | 175632 | 175632 | 23    | 27955 | AN7193 |
| 1661 | CONTIG122 | 174916 | 176395 | 1.52 | 1.09E-01 | transcription_start_site | + | 175529 | 175529 | 126   | 27954 | AN7193 |
| 1661 | CONTIG122 | 174916 | 176395 | 1.52 | 1.09E-01 | transcription_start_site | + | 175881 | 175881 | -225  | 27956 | AN7193 |
| 1661 | CONTIG122 | 174916 | 176395 | 1.52 | 1.09E-01 | transcription_start_site | + | 176353 | 176353 | -697  | 27957 | AN7193 |

|      |           |        |        |      |          |                          |   |        |        |       |       |        |
|------|-----------|--------|--------|------|----------|--------------------------|---|--------|--------|-------|-------|--------|
| 1664 | CONTIG122 | 212333 | 212687 | 1.52 | 1.25E-01 | transcription_start_site | - | 208255 | 208255 | -4255 | 28016 | AN7203 |
| 1664 | CONTIG122 | 212333 | 212687 | 1.52 | 1.25E-01 | transcription_start_site | - | 207872 | 207872 | -4638 | 28017 | AN7203 |
| 1664 | CONTIG122 | 212333 | 212687 | 1.52 | 1.25E-01 | transcription_start_site | - | 207611 | 207611 | -4899 | 28018 | AN7203 |
| 1664 | CONTIG122 | 212333 | 212687 | 1.52 | 1.25E-01 | transcription_start_site | - | 212073 | 212073 | -437  | 28026 | AN7205 |
| 1664 | CONTIG122 | 212333 | 212687 | 1.52 | 1.25E-01 | transcription_start_site | - | 211831 | 211831 | -679  | 28027 | AN7205 |
| 1664 | CONTIG122 | 212333 | 212687 | 1.52 | 1.25E-01 | transcription_start_site | - | 210523 | 210523 | -1987 | 28028 | AN7205 |
| 1664 | CONTIG122 | 212333 | 212687 | 1.52 | 1.25E-01 | transcription_start_site | + | 212416 | 212416 | 94    | 28029 | AN7206 |
| 1664 | CONTIG122 | 212333 | 212687 | 1.52 | 1.25E-01 | transcription_start_site | + | 212941 | 212941 | -431  | 28030 | AN7206 |
| 1664 | CONTIG122 | 212333 | 212687 | 1.52 | 1.25E-01 | transcription_start_site | + | 213281 | 213281 | -771  | 28031 | AN7206 |
| 1664 | CONTIG122 | 212333 | 212687 | 1.52 | 1.25E-01 | transcription_start_site | + | 213405 | 213405 | -895  | 28032 | AN7206 |
| 2266 | CONTIG123 | 846    | 1185   | 1.28 | 1.44E-01 | transcription_start_site | + | 954    | 954    | 61    | 28037 | AN7208 |
| 1357 | CONTIG123 | 7888   | 8242   | 1.66 | 4.36E-02 | transcription_start_site | + | 12391  | 12391  | -4326 | 28038 | AN7211 |
| 1357 | CONTIG123 | 7888   | 8242   | 1.66 | 4.36E-02 | transcription_start_site | + | 12642  | 12642  | -4577 | 28039 | AN7211 |
| 1127 | CONTIG123 | 22129  | 22493  | 1.81 | 2.62E-02 | transcription_start_site | - | 21585  | 21585  | -726  | 28047 | AN7215 |
| 1127 | CONTIG123 | 22129  | 22493  | 1.81 | 2.62E-02 | transcription_start_site | - | 21477  | 21477  | -834  | 28048 | AN7215 |
| 1127 | CONTIG123 | 22129  | 22493  | 1.81 | 2.62E-02 | transcription_start_site | - | 21243  | 21243  | -1068 | 28049 | AN7215 |
| 699  | CONTIG123 | 43052  | 44161  | 2.19 | 0.00E+00 | transcription_start_site | - | 39413  | 39413  | -4193 | 28056 | AN7219 |
| 699  | CONTIG123 | 43052  | 44161  | 2.19 | 0.00E+00 | transcription_start_site | - | 39093  | 39093  | -4513 | 28057 | AN7219 |
| 699  | CONTIG123 | 43052  | 44161  | 2.19 | 0.00E+00 | transcription_start_site | - | 38502  | 38502  | -5104 | 28058 | AN7219 |
| 699  | CONTIG123 | 43052  | 44161  | 2.19 | 0.00E+00 | transcription_start_site | - | 43633  | 43633  | 26    | 28063 | AN7221 |
| 699  | CONTIG123 | 43052  | 44161  | 2.19 | 0.00E+00 | transcription_start_site | - | 43550  | 43550  | -56   | 28064 | AN7221 |
| 699  | CONTIG123 | 43052  | 44161  | 2.19 | 0.00E+00 | transcription_start_site | - | 43957  | 43957  | 350   | 28062 | AN7221 |
| 699  | CONTIG123 | 43052  | 44161  | 2.19 | 0.00E+00 | transcription_start_site | - | 44291  | 44291  | 684   | 28061 | AN7221 |
| 699  | CONTIG123 | 43052  | 44161  | 2.19 | 0.00E+00 | transcription_start_site | + | 45392  | 45392  | -1785 | 28065 | AN7222 |
| 699  | CONTIG123 | 43052  | 44161  | 2.19 | 0.00E+00 | transcription_start_site | + | 45915  | 45915  | -2308 | 28066 | AN7222 |
| 699  | CONTIG123 | 43052  | 44161  | 2.19 | 0.00E+00 | transcription_start_site | + | 46307  | 46307  | -2700 | 28067 | AN7222 |
| 699  | CONTIG123 | 43052  | 44161  | 2.19 | 0.00E+00 | transcription_start_site | + | 46636  | 46636  | -3029 | 28068 | AN7222 |
| 709  | CONTIG123 | 58357  | 58776  | 2.19 | 6.61E-03 | transcription_start_site | - | 56033  | 56033  | -2533 | 28069 | AN7223 |
| 709  | CONTIG123 | 58357  | 58776  | 2.19 | 6.61E-03 | transcription_start_site | - | 54499  | 54499  | -4067 | 28070 | AN7223 |
| 1203 | CONTIG123 | 55142  | 55476  | 1.76 | 3.08E-02 | transcription_start_site | - | 56033  | 56033  | 724   | 28069 | AN7223 |
| 1203 | CONTIG123 | 55142  | 55476  | 1.76 | 3.08E-02 | transcription_start_site | - | 54499  | 54499  | -810  | 28070 | AN7223 |
| 1204 | CONTIG123 | 68402  | 68686  | 1.76 | 3.08E-02 | transcription_start_site | + | 68348  | 68348  | 196   | 28079 | AN7227 |
| 1204 | CONTIG123 | 68402  | 68686  | 1.76 | 3.08E-02 | transcription_start_site | + | 68075  | 68075  | 469   | 28078 | AN7227 |
| 1204 | CONTIG123 | 68402  | 68686  | 1.76 | 3.08E-02 | transcription_start_site | + | 67828  | 67828  | 716   | 28077 | AN7227 |
| 1204 | CONTIG123 | 68402  | 68686  | 1.76 | 3.08E-02 | transcription_start_site | + | 67570  | 67570  | 974   | 28076 | AN7227 |
| 1204 | CONTIG123 | 68402  | 68686  | 1.76 | 3.08E-02 | transcription_start_site | + | 69910  | 69910  | -1366 | 28080 | AN7228 |
| 1204 | CONTIG123 | 68402  | 68686  | 1.76 | 3.08E-02 | transcription_start_site | + | 70057  | 70057  | -1513 | 28081 | AN7228 |
| 1204 | CONTIG123 | 68402  | 68686  | 1.76 | 3.08E-02 | transcription_start_site | + | 70229  | 70229  | -1685 | 28082 | AN7228 |
| 1204 | CONTIG123 | 68402  | 68686  | 1.76 | 3.08E-02 | transcription_start_site | + | 70702  | 70702  | -2158 | 28083 | AN7228 |
| 2386 | CONTIG123 | 71037  | 71841  | 1.24 | 1.59E-01 | transcription_start_site | + | 70702  | 70702  | 737   | 28083 | AN7228 |
| 2386 | CONTIG123 | 71037  | 71841  | 1.24 | 1.59E-01 | transcription_start_site | + | 70229  | 70229  | 1210  | 28082 | AN7228 |
| 2386 | CONTIG123 | 71037  | 71841  | 1.24 | 1.59E-01 | transcription_start_site | + | 70057  | 70057  | 1382  | 28081 | AN7228 |
| 50   | CONTIG123 | 72012  | 72731  | 3.42 | 0.00E+00 | transcription_start_site | + | 73164  | 73164  | -792  | 28084 | AN7229 |
| 50   | CONTIG123 | 72012  | 72731  | 3.42 | 0.00E+00 | transcription_start_site | + | 73546  | 73546  | -1174 | 28085 | AN7229 |
| 1204 | CONTIG123 | 68402  | 68686  | 1.76 | 3.08E-02 | transcription_start_site | + | 73164  | 73164  | -4620 | 28084 | AN7229 |
| 1204 | CONTIG123 | 68402  | 68686  | 1.76 | 3.08E-02 | transcription_start_site | + | 73546  | 73546  | -5002 | 28085 | AN7229 |
| 2386 | CONTIG123 | 71037  | 71841  | 1.24 | 1.59E-01 | transcription_start_site | + | 73164  | 73164  | -1725 | 28084 | AN7229 |
| 2386 | CONTIG123 | 71037  | 71841  | 1.24 | 1.59E-01 | transcription_start_site | + | 73546  | 73546  | -2107 | 28085 | AN7229 |
| 50   | CONTIG123 | 72012  | 72731  | 3.42 | 0.00E+00 | transcription_start_site | + | 77107  | 77107  | -4735 | 28086 | AN7230 |
| 50   | CONTIG123 | 72012  | 72731  | 3.42 | 0.00E+00 | transcription_start_site | + | 77259  | 77259  | -4887 | 28087 | AN7230 |
| 50   | CONTIG123 | 72012  | 72731  | 3.42 | 0.00E+00 | transcription_start_site | + | 77468  | 77468  | -5096 | 28088 | AN7230 |
| 2118 | CONTIG123 | 75093  | 76107  | 1.33 | 1.09E-01 | transcription_start_site | + | 77107  | 77107  | -1507 | 28086 | AN7230 |
| 2118 | CONTIG123 | 75093  | 76107  | 1.33 | 1.09E-01 | transcription_start_site | + | 77259  | 77259  | -1659 | 28087 | AN7230 |
| 2118 | CONTIG123 | 75093  | 76107  | 1.33 | 1.09E-01 | transcription_start_site | + | 77468  | 77468  | -1868 | 28088 | AN7230 |
| 2118 | CONTIG123 | 75093  | 76107  | 1.33 | 1.09E-01 | transcription_start_site | + | 78863  | 78863  | -3263 | 28089 | AN7230 |
| 2118 | CONTIG123 | 75093  | 76107  | 1.33 | 1.09E-01 | transcription_start_site | + | 79063  | 79063  | -3463 | 28090 | AN7230 |
| 2118 | CONTIG123 | 75093  | 76107  | 1.33 | 1.09E-01 | transcription_start_site | + | 79217  | 79217  | -3617 | 28091 | AN7230 |

|      |           |        |        |      |          |                          |   |        |        |       |       |        |
|------|-----------|--------|--------|------|----------|--------------------------|---|--------|--------|-------|-------|--------|
| 194  | CONTIG123 | 87453  | 87877  | 2.95 | 2.67E-04 | transcription_start_site | - | 86042  | 86042  | -1623 | 28093 | AN7232 |
| 194  | CONTIG123 | 87453  | 87877  | 2.95 | 2.67E-04 | transcription_start_site | - | 85836  | 85836  | -1829 | 28094 | AN7232 |
| 194  | CONTIG123 | 87453  | 87877  | 2.95 | 2.67E-04 | transcription_start_site | - | 85278  | 85278  | -2387 | 28095 | AN7232 |
| 194  | CONTIG123 | 87453  | 87877  | 2.95 | 2.67E-04 | transcription_start_site | + | 87832  | 87832  | -167  | 28096 | AN7233 |
| 194  | CONTIG123 | 87453  | 87877  | 2.95 | 2.67E-04 | transcription_start_site | + | 88283  | 88283  | -618  | 28097 | AN7233 |
| 194  | CONTIG123 | 87453  | 87877  | 2.95 | 2.67E-04 | transcription_start_site | + | 88691  | 88691  | -1026 | 28098 | AN7233 |
| 194  | CONTIG123 | 87453  | 87877  | 2.95 | 2.67E-04 | transcription_start_site | + | 90713  | 90713  | -3048 | 28099 | AN7234 |
| 704  | CONTIG123 | 126312 | 126806 | 2.19 | 2.49E-03 | transcription_start_site | - | 127279 | 127279 | 720   | 28138 | AN7247 |
| 704  | CONTIG123 | 126312 | 126806 | 2.19 | 2.49E-03 | transcription_start_site | - | 127407 | 127407 | 848   | 28137 | AN7247 |
| 920  | CONTIG124 | 11268  | 11602  | 1.98 | 3.31E-03 | transcription_start_site | + | 12115  | 12115  | -680  | 28141 | AN7250 |
| 2533 | CONTIG124 | 30526  | 30960  | 1.19 | 1.44E-01 | transcription_start_site | - | 28101  | 28101  | -2642 | 28148 | AN7254 |
| 2533 | CONTIG124 | 30526  | 30960  | 1.19 | 1.44E-01 | transcription_start_site | - | 28007  | 28007  | -2736 | 28149 | AN7254 |
| 2533 | CONTIG124 | 30526  | 30960  | 1.19 | 1.44E-01 | transcription_start_site | - | 27927  | 27927  | -2816 | 28150 | AN7254 |
| 2533 | CONTIG124 | 30526  | 30960  | 1.19 | 1.44E-01 | transcription_start_site | - | 27803  | 27803  | -2940 | 28151 | AN7254 |
| 2533 | CONTIG124 | 30526  | 30960  | 1.19 | 1.44E-01 | transcription_start_site | - | 27493  | 27493  | -3250 | 28152 | AN7254 |
| 2533 | CONTIG124 | 30526  | 30960  | 1.19 | 1.44E-01 | transcription_start_site | - | 25947  | 25947  | -4796 | 28153 | AN7254 |
| 2533 | CONTIG124 | 30526  | 30960  | 1.19 | 1.44E-01 | transcription_start_site | - | 30814  | 30814  | 71    | 28156 | AN7256 |
| 2533 | CONTIG124 | 30526  | 30960  | 1.19 | 1.44E-01 | transcription_start_site | - | 31063  | 31063  | 320   | 28155 | AN7256 |
| 2533 | CONTIG124 | 30526  | 30960  | 1.19 | 1.44E-01 | transcription_start_site | - | 29977  | 29977  | -766  | 28157 | AN7256 |
| 2533 | CONTIG124 | 30526  | 30960  | 1.19 | 1.44E-01 | transcription_start_site | + | 33648  | 33648  | -2905 | 28159 | AN7258 |
| 2533 | CONTIG124 | 30526  | 30960  | 1.19 | 1.44E-01 | transcription_start_site | + | 33859  | 33859  | -3116 | 28160 | AN7258 |
| 2533 | CONTIG124 | 30526  | 30960  | 1.19 | 1.44E-01 | transcription_start_site | + | 34196  | 34196  | -3453 | 28161 | AN7258 |
| 2533 | CONTIG124 | 30526  | 30960  | 1.19 | 1.44E-01 | transcription_start_site | + | 34514  | 34514  | -3771 | 28162 | AN7258 |
| 455  | CONTIG124 | 45981  | 46475  | 2.51 | 0.00E+00 | transcription_start_site | - | 43071  | 43071  | -3157 | 28170 | AN7261 |
| 455  | CONTIG124 | 45981  | 46475  | 2.51 | 0.00E+00 | transcription_start_site | - | 42946  | 42946  | -3282 | 28171 | AN7261 |
| 2042 | CONTIG124 | 47796  | 48215  | 1.36 | 8.01E-02 | transcription_start_site | - | 43071  | 43071  | -4934 | 28170 | AN7261 |
| 2042 | CONTIG124 | 47796  | 48215  | 1.36 | 8.01E-02 | transcription_start_site | - | 42946  | 42946  | -5059 | 28171 | AN7261 |
| 2042 | CONTIG124 | 47796  | 48215  | 1.36 | 8.01E-02 | transcription_start_site | - | 48738  | 48738  | 732   | 28173 | AN7262 |
| 2042 | CONTIG124 | 47796  | 48215  | 1.36 | 8.01E-02 | transcription_start_site | - | 48831  | 48831  | 825   | 28172 | AN7262 |
| 2137 | CONTIG124 | 50251  | 50525  | 1.32 | 9.24E-02 | transcription_start_site | - | 48831  | 48831  | -1557 | 28172 | AN7262 |
| 2137 | CONTIG124 | 50251  | 50525  | 1.32 | 9.24E-02 | transcription_start_site | - | 48738  | 48738  | -1650 | 28173 | AN7262 |
| 1769 | CONTIG125 | 7292   | 7569   | 1.47 | 4.36E-02 | transcription_start_site | - | 4406   | 4406   | -3024 | 28176 | AN7264 |
| 2580 | CONTIG125 | 7742   | 8611   | 1.17 | 1.07E-01 | transcription_start_site | - | 4406   | 4406   | -3770 | 28176 | AN7264 |
| 1769 | CONTIG125 | 7292   | 7569   | 1.47 | 4.36E-02 | transcription_start_site | + | 7160   | 7160   | 270   | 28182 | AN7266 |
| 1769 | CONTIG125 | 7292   | 7569   | 1.47 | 4.36E-02 | transcription_start_site | + | 7014   | 7014   | 416   | 28181 | AN7266 |
| 2580 | CONTIG125 | 7742   | 8611   | 1.17 | 1.07E-01 | transcription_start_site | + | 7160   | 7160   | 1016  | 28182 | AN7266 |
| 2580 | CONTIG125 | 7742   | 8611   | 1.17 | 1.07E-01 | transcription_start_site | + | 7014   | 7014   | 1162  | 28181 | AN7266 |
| 1253 | CONTIG125 | 12092  | 12366  | 1.72 | 1.57E-02 | transcription_start_site | - | 9221   | 9221   | -3008 | 28183 | AN7267 |
| 2580 | CONTIG125 | 7742   | 8611   | 1.17 | 1.07E-01 | transcription_start_site | - | 9221   | 9221   | 1044  | 28183 | AN7267 |
| 1769 | CONTIG125 | 7292   | 7569   | 1.47 | 4.36E-02 | transcription_start_site | + | 9426   | 9426   | -1995 | 28184 | AN7268 |
| 1769 | CONTIG125 | 7292   | 7569   | 1.47 | 4.36E-02 | transcription_start_site | + | 9501   | 9501   | -2070 | 28185 | AN7268 |
| 2580 | CONTIG125 | 7742   | 8611   | 1.17 | 1.07E-01 | transcription_start_site | + | 9426   | 9426   | -1249 | 28184 | AN7268 |
| 2580 | CONTIG125 | 7742   | 8611   | 1.17 | 1.07E-01 | transcription_start_site | + | 9501   | 9501   | -1324 | 28185 | AN7268 |
| 1253 | CONTIG125 | 12092  | 12366  | 1.72 | 1.57E-02 | transcription_start_site | - | 11871  | 11871  | -358  | 28186 | AN7269 |
| 1253 | CONTIG125 | 12092  | 12366  | 1.72 | 1.57E-02 | transcription_start_site | - | 11532  | 11532  | -697  | 28187 | AN7269 |
| 1253 | CONTIG125 | 12092  | 12366  | 1.72 | 1.57E-02 | transcription_start_site | - | 10658  | 10658  | -1571 | 28188 | AN7269 |
| 1253 | CONTIG125 | 12092  | 12366  | 1.72 | 1.57E-02 | transcription_start_site | - | 10392  | 10392  | -1837 | 28189 | AN7269 |
| 1253 | CONTIG125 | 12092  | 12366  | 1.72 | 1.57E-02 | transcription_start_site | + | 12943  | 12943  | -714  | 28190 | AN7270 |
| 1253 | CONTIG125 | 12092  | 12366  | 1.72 | 1.57E-02 | transcription_start_site | + | 13353  | 13353  | -1124 | 28191 | AN7270 |
| 1253 | CONTIG125 | 12092  | 12366  | 1.72 | 1.57E-02 | transcription_start_site | + | 13500  | 13500  | -1271 | 28192 | AN7270 |
| 2580 | CONTIG125 | 7742   | 8611   | 1.17 | 1.07E-01 | transcription_start_site | + | 12943  | 12943  | -4766 | 28190 | AN7270 |
| 2580 | CONTIG125 | 7742   | 8611   | 1.17 | 1.07E-01 | transcription_start_site | + | 13353  | 13353  | -5176 | 28191 | AN7270 |
| 2580 | CONTIG125 | 7742   | 8611   | 1.17 | 1.07E-01 | transcription_start_site | + | 13500  | 13500  | -5323 | 28192 | AN7270 |
| 1253 | CONTIG125 | 12092  | 12366  | 1.72 | 1.57E-02 | transcription_start_site | + | 14976  | 14976  | -2747 | 28193 | AN7271 |
| 1253 | CONTIG125 | 12092  | 12366  | 1.72 | 1.57E-02 | transcription_start_site | + | 15760  | 15760  | -3531 | 28194 | AN7271 |
| 974  | CONTIG125 | 22739  | 23003  | 1.93 | 6.61E-03 | transcription_start_site | - | 19057  | 19057  | -3814 | 28195 | AN7272 |
| 974  | CONTIG125 | 22739  | 23003  | 1.93 | 6.61E-03 | transcription_start_site | - | 18923  | 18923  | -3948 | 28196 | AN7272 |

|      |           |       |       |      |          |                          |   |       |       |       |       |        |
|------|-----------|-------|-------|------|----------|--------------------------|---|-------|-------|-------|-------|--------|
| 974  | CONTIG125 | 22739 | 23003 | 1.93 | 6.61E-03 | transcription_start_site | - | 18475 | 18475 | -4396 | 28197 | AN7272 |
| 974  | CONTIG125 | 22739 | 23003 | 1.93 | 6.61E-03 | transcription_start_site | - | 18090 | 18090 | -4781 | 28198 | AN7272 |
| 974  | CONTIG125 | 22739 | 23003 | 1.93 | 6.61E-03 | transcription_start_site | - | 17918 | 17918 | -4953 | 28199 | AN7272 |
| 2832 | CONTIG125 | 21609 | 21893 | 1.05 | 1.93E-01 | transcription_start_site | - | 19057 | 19057 | -2694 | 28195 | AN7272 |
| 2832 | CONTIG125 | 21609 | 21893 | 1.05 | 1.93E-01 | transcription_start_site | - | 18923 | 18923 | -2828 | 28196 | AN7272 |
| 2832 | CONTIG125 | 21609 | 21893 | 1.05 | 1.93E-01 | transcription_start_site | - | 18475 | 18475 | -3276 | 28197 | AN7272 |
| 2832 | CONTIG125 | 21609 | 21893 | 1.05 | 1.93E-01 | transcription_start_site | - | 18090 | 18090 | -3661 | 28198 | AN7272 |
| 2832 | CONTIG125 | 21609 | 21893 | 1.05 | 1.93E-01 | transcription_start_site | - | 17918 | 17918 | -3833 | 28199 | AN7272 |
| 2832 | CONTIG125 | 21609 | 21893 | 1.05 | 1.93E-01 | transcription_start_site | - | 17689 | 17689 | -4062 | 28200 | AN7272 |
| 2832 | CONTIG125 | 21609 | 21893 | 1.05 | 1.93E-01 | transcription_start_site | - | 17569 | 17569 | -4182 | 28201 | AN7272 |
| 2832 | CONTIG125 | 21609 | 21893 | 1.05 | 1.93E-01 | transcription_start_site | - | 17112 | 17112 | -4639 | 28202 | AN7272 |
| 2832 | CONTIG125 | 21609 | 21893 | 1.05 | 1.93E-01 | transcription_start_site | - | 16837 | 16837 | -4914 | 28203 | AN7272 |
| 974  | CONTIG125 | 22739 | 23003 | 1.93 | 6.61E-03 | transcription_start_site | - | 22093 | 22093 | -778  | 28204 | AN7273 |
| 2832 | CONTIG125 | 21609 | 21893 | 1.05 | 1.93E-01 | transcription_start_site | - | 22093 | 22093 | 342   | 28204 | AN7273 |
| 974  | CONTIG125 | 22739 | 23003 | 1.93 | 6.61E-03 | transcription_start_site | + | 26059 | 26059 | -3188 | 28205 | AN7274 |
| 974  | CONTIG125 | 22739 | 23003 | 1.93 | 6.61E-03 | transcription_start_site | + | 26970 | 26970 | -4099 | 28206 | AN7274 |
| 974  | CONTIG125 | 22739 | 23003 | 1.93 | 6.61E-03 | transcription_start_site | + | 27418 | 27418 | -4547 | 28207 | AN7274 |
| 2832 | CONTIG125 | 21609 | 21893 | 1.05 | 1.93E-01 | transcription_start_site | + | 26059 | 26059 | -4308 | 28205 | AN7274 |
| 1344 | CONTIG126 | 19146 | 19400 | 1.66 | 2.67E-04 | transcription_start_site | + | 20056 | 20056 | -783  | 28211 | AN7278 |
| 1344 | CONTIG126 | 19146 | 19400 | 1.66 | 2.67E-04 | transcription_start_site | + | 20332 | 20332 | -1059 | 28212 | AN7278 |
| 1344 | CONTIG126 | 19146 | 19400 | 1.66 | 2.67E-04 | transcription_start_site | + | 20411 | 20411 | -1138 | 28213 | AN7278 |
| 1344 | CONTIG126 | 19146 | 19400 | 1.66 | 2.67E-04 | transcription_start_site | + | 21127 | 21127 | -1854 | 28214 | AN7278 |
| 1344 | CONTIG126 | 19146 | 19400 | 1.66 | 2.67E-04 | transcription_start_site | + | 21747 | 21747 | -2474 | 28215 | AN7278 |
| 589  | CONTIG127 | 9092  | 9524  | 2.32 | 0.00E+00 | transcription_start_site | - | 8380  | 8380  | -928  | 28238 | AN7286 |
| 589  | CONTIG127 | 9092  | 9524  | 2.32 | 0.00E+00 | transcription_start_site | - | 7601  | 7601  | -1707 | 28239 | AN7286 |
| 589  | CONTIG127 | 9092  | 9524  | 2.32 | 0.00E+00 | transcription_start_site | - | 7461  | 7461  | -1847 | 28240 | AN7286 |
| 1786 | CONTIG127 | 10142 | 10941 | 1.46 | 8.81E-03 | transcription_start_site | - | 8380  | 8380  | -2161 | 28238 | AN7286 |
| 1786 | CONTIG127 | 10142 | 10941 | 1.46 | 8.81E-03 | transcription_start_site | - | 7601  | 7601  | -2940 | 28239 | AN7286 |
| 1786 | CONTIG127 | 10142 | 10941 | 1.46 | 8.81E-03 | transcription_start_site | - | 7461  | 7461  | -3080 | 28240 | AN7286 |
| 589  | CONTIG127 | 9092  | 9524  | 2.32 | 0.00E+00 | transcription_start_site | + | 10527 | 10527 | -1219 | 28241 | AN7287 |
| 589  | CONTIG127 | 9092  | 9524  | 2.32 | 0.00E+00 | transcription_start_site | + | 10694 | 10694 | -1386 | 28242 | AN7287 |
| 1786 | CONTIG127 | 10142 | 10941 | 1.46 | 8.81E-03 | transcription_start_site | + | 10527 | 10527 | 14    | 28241 | AN7287 |
| 1786 | CONTIG127 | 10142 | 10941 | 1.46 | 8.81E-03 | transcription_start_site | + | 10694 | 10694 | -152  | 28242 | AN7287 |
| 3028 | CONTIG127 | 18619 | 18958 | 0.86 | 1.66E-01 | transcription_start_site | - | 15649 | 15649 | -3139 | 28243 | AN7288 |
| 3028 | CONTIG127 | 18619 | 18958 | 0.86 | 1.66E-01 | transcription_start_site | - | 14588 | 14588 | -4200 | 28244 | AN7288 |
| 3028 | CONTIG127 | 18619 | 18958 | 0.86 | 1.66E-01 | transcription_start_site | + | 18576 | 18576 | 212   | 28248 | AN7289 |
| 3028 | CONTIG127 | 18619 | 18958 | 0.86 | 1.66E-01 | transcription_start_site | + | 18274 | 18274 | 514   | 28247 | AN7289 |
| 3028 | CONTIG127 | 18619 | 18958 | 0.86 | 1.66E-01 | transcription_start_site | - | 19227 | 19227 | 438   | 28249 | AN7290 |
| 3028 | CONTIG127 | 18619 | 18958 | 0.86 | 1.66E-01 | transcription_start_site | + | 19659 | 19659 | -870  | 28250 | AN7291 |
| 3028 | CONTIG127 | 18619 | 18958 | 0.86 | 1.66E-01 | transcription_start_site | + | 19735 | 19735 | -946  | 28251 | AN7291 |
| 3028 | CONTIG127 | 18619 | 18958 | 0.86 | 1.66E-01 | transcription_start_site | + | 20241 | 20241 | -1452 | 28252 | AN7291 |
| 3028 | CONTIG127 | 18619 | 18958 | 0.86 | 1.66E-01 | transcription_start_site | + | 20379 | 20379 | -1590 | 28253 | AN7291 |
| 3028 | CONTIG127 | 18619 | 18958 | 0.86 | 1.66E-01 | transcription_start_site | + | 21171 | 21171 | -2382 | 28254 | AN7292 |
| 3028 | CONTIG127 | 18619 | 18958 | 0.86 | 1.66E-01 | transcription_start_site | + | 21381 | 21381 | -2592 | 28255 | AN7292 |
| 3028 | CONTIG127 | 18619 | 18958 | 0.86 | 1.66E-01 | transcription_start_site | + | 21846 | 21846 | -3057 | 28256 | AN7292 |
| 3028 | CONTIG127 | 18619 | 18958 | 0.86 | 1.66E-01 | transcription_start_site | + | 22252 | 22252 | -3463 | 28257 | AN7292 |
| 3028 | CONTIG127 | 18619 | 18958 | 0.86 | 1.66E-01 | transcription_start_site | + | 22363 | 22363 | -3574 | 28258 | AN7292 |
| 1630 | CONTIG127 | 28955 | 29379 | 1.52 | 2.49E-03 | transcription_start_site | - | 24234 | 24234 | -4933 | 28259 | AN7293 |
| 2599 | CONTIG127 | 27395 | 27664 | 1.16 | 4.36E-02 | transcription_start_site | - | 24234 | 24234 | -3295 | 28259 | AN7293 |
| 2599 | CONTIG127 | 27395 | 27664 | 1.16 | 4.36E-02 | transcription_start_site | - | 23799 | 23799 | -3730 | 28260 | AN7293 |
| 2599 | CONTIG127 | 27395 | 27664 | 1.16 | 4.36E-02 | transcription_start_site | - | 23677 | 23677 | -3852 | 28261 | AN7293 |
| 2599 | CONTIG127 | 27395 | 27664 | 1.16 | 4.36E-02 | transcription_start_site | - | 23502 | 23502 | -4027 | 28262 | AN7293 |
| 2599 | CONTIG127 | 27395 | 27664 | 1.16 | 4.36E-02 | transcription_start_site | + | 26863 | 26863 | 666   | 28264 | AN7294 |
| 2599 | CONTIG127 | 27395 | 27664 | 1.16 | 4.36E-02 | transcription_start_site | + | 26504 | 26504 | 1025  | 28263 | AN7294 |
| 1630 | CONTIG127 | 28955 | 29379 | 1.52 | 2.49E-03 | transcription_start_site | + | 30032 | 30032 | -865  | 28265 | AN7295 |
| 1630 | CONTIG127 | 28955 | 29379 | 1.52 | 2.49E-03 | transcription_start_site | + | 30816 | 30816 | -1649 | 28266 | AN7295 |
| 2599 | CONTIG127 | 27395 | 27664 | 1.16 | 4.36E-02 | transcription_start_site | + | 30032 | 30032 | -2502 | 28265 | AN7295 |

|      |           |        |        |      |          |                          |   |        |        |       |       |        |
|------|-----------|--------|--------|------|----------|--------------------------|---|--------|--------|-------|-------|--------|
| 2599 | CONTIG127 | 27395  | 27664  | 1.16 | 4.36E-02 | transcription_start_site | + | 30816  | 30816  | -3286 | 28266 | AN7295 |
| 1630 | CONTIG127 | 28955  | 29379  | 1.52 | 2.49E-03 | transcription_start_site | + | 32188  | 32188  | -3021 | 28267 | AN7296 |
| 1630 | CONTIG127 | 28955  | 29379  | 1.52 | 2.49E-03 | transcription_start_site | + | 32620  | 32620  | -3453 | 28268 | AN7296 |
| 1630 | CONTIG127 | 28955  | 29379  | 1.52 | 2.49E-03 | transcription_start_site | + | 34344  | 34344  | -5177 | 28269 | AN7296 |
| 2599 | CONTIG127 | 27395  | 27664  | 1.16 | 4.36E-02 | transcription_start_site | + | 32188  | 32188  | -4658 | 28267 | AN7296 |
| 2599 | CONTIG127 | 27395  | 27664  | 1.16 | 4.36E-02 | transcription_start_site | + | 32620  | 32620  | -5090 | 28268 | AN7296 |
| 2519 | CONTIG127 | 41340  | 41836  | 1.19 | 3.70E-02 | transcription_start_site | - | 40840  | 40840  | -748  | 28270 | AN7297 |
| 2519 | CONTIG127 | 41340  | 41836  | 1.19 | 3.70E-02 | transcription_start_site | - | 38650  | 38650  | -2938 | 28271 | AN7297 |
| 2699 | CONTIG127 | 38945  | 39279  | 1.12 | 5.22E-02 | transcription_start_site | - | 38650  | 38650  | -462  | 28271 | AN7297 |
| 2984 | CONTIG127 | 43215  | 43859  | 0.93 | 1.25E-01 | transcription_start_site | - | 40840  | 40840  | -2697 | 28270 | AN7297 |
| 2984 | CONTIG127 | 43215  | 43859  | 0.93 | 1.25E-01 | transcription_start_site | - | 38650  | 38650  | -4887 | 28271 | AN7297 |
| 2519 | CONTIG127 | 41340  | 41836  | 1.19 | 3.70E-02 | transcription_start_site | - | 41848  | 41848  | 260   | 28274 | AN7298 |
| 2519 | CONTIG127 | 41340  | 41836  | 1.19 | 3.70E-02 | transcription_start_site | - | 41958  | 41958  | 370   | 28273 | AN7298 |
| 2984 | CONTIG127 | 43215  | 43859  | 0.93 | 1.25E-01 | transcription_start_site | - | 43015  | 43015  | -522  | 28272 | AN7298 |
| 2984 | CONTIG127 | 43215  | 43859  | 0.93 | 1.25E-01 | transcription_start_site | - | 41958  | 41958  | -1579 | 28273 | AN7298 |
| 2984 | CONTIG127 | 43215  | 43859  | 0.93 | 1.25E-01 | transcription_start_site | - | 41848  | 41848  | -1689 | 28274 | AN7298 |
| 2519 | CONTIG127 | 41340  | 41836  | 1.19 | 3.70E-02 | transcription_start_site | + | 43862  | 43862  | -2274 | 28275 | AN7299 |
| 2519 | CONTIG127 | 41340  | 41836  | 1.19 | 3.70E-02 | transcription_start_site | + | 44147  | 44147  | -2559 | 28276 | AN7299 |
| 2519 | CONTIG127 | 41340  | 41836  | 1.19 | 3.70E-02 | transcription_start_site | + | 44304  | 44304  | -2716 | 28277 | AN7299 |
| 2519 | CONTIG127 | 41340  | 41836  | 1.19 | 3.70E-02 | transcription_start_site | + | 44488  | 44488  | -2900 | 28278 | AN7299 |
| 2519 | CONTIG127 | 41340  | 41836  | 1.19 | 3.70E-02 | transcription_start_site | + | 45363  | 45363  | -3775 | 28279 | AN7299 |
| 2699 | CONTIG127 | 38945  | 39279  | 1.12 | 5.22E-02 | transcription_start_site | + | 43862  | 43862  | -4750 | 28275 | AN7299 |
| 2699 | CONTIG127 | 38945  | 39279  | 1.12 | 5.22E-02 | transcription_start_site | + | 44147  | 44147  | -5035 | 28276 | AN7299 |
| 2984 | CONTIG127 | 43215  | 43859  | 0.93 | 1.25E-01 | transcription_start_site | + | 43862  | 43862  | -325  | 28275 | AN7299 |
| 2984 | CONTIG127 | 43215  | 43859  | 0.93 | 1.25E-01 | transcription_start_site | + | 44147  | 44147  | -610  | 28276 | AN7299 |
| 2984 | CONTIG127 | 43215  | 43859  | 0.93 | 1.25E-01 | transcription_start_site | + | 44304  | 44304  | -767  | 28277 | AN7299 |
| 2984 | CONTIG127 | 43215  | 43859  | 0.93 | 1.25E-01 | transcription_start_site | + | 44488  | 44488  | -951  | 28278 | AN7299 |
| 2984 | CONTIG127 | 43215  | 43859  | 0.93 | 1.25E-01 | transcription_start_site | + | 45363  | 45363  | -1826 | 28279 | AN7299 |
| 2984 | CONTIG127 | 43215  | 43859  | 0.93 | 1.25E-01 | transcription_start_site | + | 48468  | 48468  | -4931 | 28280 | AN7300 |
| 1251 | CONTIG127 | 62557  | 62838  | 1.72 | 1.80E-03 | transcription_start_site | + | 62980  | 62980  | -282  | 28303 | AN7304 |
| 1251 | CONTIG127 | 62557  | 62838  | 1.72 | 1.80E-03 | transcription_start_site | + | 63365  | 63365  | -667  | 28304 | AN7304 |
| 1251 | CONTIG127 | 62557  | 62838  | 1.72 | 1.80E-03 | transcription_start_site | + | 64946  | 64946  | -2248 | 28305 | AN7305 |
| 1251 | CONTIG127 | 62557  | 62838  | 1.72 | 1.80E-03 | transcription_start_site | + | 65671  | 65671  | -2973 | 28306 | AN7305 |
| 1714 | CONTIG127 | 69527  | 70031  | 1.49 | 7.85E-03 | transcription_start_site | - | 70918  | 70918  | 1139  | 28309 | AN7307 |
| 1714 | CONTIG127 | 69527  | 70031  | 1.49 | 7.85E-03 | transcription_start_site | + | 74778  | 74778  | -4999 | 28318 | AN7309 |
| 2313 | CONTIG127 | 90678  | 91039  | 1.26 | 1.44E-02 | transcription_start_site | - | 86903  | 86903  | -3955 | 28328 | AN7313 |
| 2313 | CONTIG127 | 90678  | 91039  | 1.26 | 1.44E-02 | transcription_start_site | - | 86742  | 86742  | -4116 | 28329 | AN7313 |
| 2313 | CONTIG127 | 90678  | 91039  | 1.26 | 1.44E-02 | transcription_start_site | - | 86201  | 86201  | -4657 | 28330 | AN7313 |
| 2313 | CONTIG127 | 90678  | 91039  | 1.26 | 1.44E-02 | transcription_start_site | - | 85968  | 85968  | -4890 | 28331 | AN7313 |
| 2313 | CONTIG127 | 90678  | 91039  | 1.26 | 1.44E-02 | transcription_start_site | - | 90891  | 90891  | 32    | 28332 | AN7314 |
| 2859 | CONTIG127 | 123678 | 124032 | 1.03 | 8.01E-02 | transcription_start_site | + | 124378 | 124378 | -523  | 28374 | AN7327 |
| 3017 | CONTIG127 | 124278 | 124791 | 0.89 | 1.44E-01 | transcription_start_site | + | 124378 | 124378 | 156   | 28374 | AN7327 |
| 2753 | CONTIG127 | 126753 | 127417 | 1.09 | 3.99E-02 | transcription_start_site | + | 126754 | 126754 | 331   | 28375 | AN7328 |
| 2753 | CONTIG127 | 126753 | 127417 | 1.09 | 3.99E-02 | transcription_start_site | + | 127491 | 127491 | -406  | 28376 | AN7328 |
| 2859 | CONTIG127 | 123678 | 124032 | 1.03 | 8.01E-02 | transcription_start_site | + | 126754 | 126754 | -2899 | 28375 | AN7328 |
| 2859 | CONTIG127 | 123678 | 124032 | 1.03 | 8.01E-02 | transcription_start_site | + | 127491 | 127491 | -3636 | 28376 | AN7328 |
| 3017 | CONTIG127 | 124278 | 124791 | 0.89 | 1.44E-01 | transcription_start_site | + | 126754 | 126754 | -2219 | 28375 | AN7328 |
| 3017 | CONTIG127 | 124278 | 124791 | 0.89 | 1.44E-01 | transcription_start_site | + | 127491 | 127491 | -2956 | 28376 | AN7328 |
| 2753 | CONTIG127 | 126753 | 127417 | 1.09 | 3.99E-02 | transcription_start_site | + | 128818 | 128818 | -1733 | 28377 | AN7329 |
| 2753 | CONTIG127 | 126753 | 127417 | 1.09 | 3.99E-02 | transcription_start_site | + | 129043 | 129043 | -1958 | 28378 | AN7329 |
| 2753 | CONTIG127 | 126753 | 127417 | 1.09 | 3.99E-02 | transcription_start_site | + | 129413 | 129413 | -2328 | 28379 | AN7329 |
| 2753 | CONTIG127 | 126753 | 127417 | 1.09 | 3.99E-02 | transcription_start_site | + | 129542 | 129542 | -2457 | 28380 | AN7329 |
| 2859 | CONTIG127 | 123678 | 124032 | 1.03 | 8.01E-02 | transcription_start_site | + | 128818 | 128818 | -4963 | 28377 | AN7329 |
| 3017 | CONTIG127 | 124278 | 124791 | 0.89 | 1.44E-01 | transcription_start_site | + | 128818 | 128818 | -4283 | 28377 | AN7329 |
| 3017 | CONTIG127 | 124278 | 124791 | 0.89 | 1.44E-01 | transcription_start_site | + | 129043 | 129043 | -4508 | 28378 | AN7329 |
| 3017 | CONTIG127 | 124278 | 124791 | 0.89 | 1.44E-01 | transcription_start_site | + | 129413 | 129413 | -4878 | 28379 | AN7329 |
| 3017 | CONTIG127 | 124278 | 124791 | 0.89 | 1.44E-01 | transcription_start_site | + | 129542 | 129542 | -5007 | 28380 | AN7329 |

|      |           |       |       |      |          |                          |   |       |       |       |       |        |
|------|-----------|-------|-------|------|----------|--------------------------|---|-------|-------|-------|-------|--------|
| 2401 | CONTIG128 | 3841  | 4105  | 1.23 | 5.88E-02 | transcription_start_site | + | 3092  | 3092  | 881   | 28401 | AN7334 |
| 2401 | CONTIG128 | 3841  | 4105  | 1.23 | 5.88E-02 | transcription_start_site | + | 2895  | 2895  | 1078  | 28400 | AN7334 |
| 2401 | CONTIG128 | 3841  | 4105  | 1.23 | 5.88E-02 | transcription_start_site | + | 5126  | 5126  | -1153 | 28402 | AN7334 |
| 2402 | CONTIG128 | 10894 | 11458 | 1.23 | 5.88E-02 | transcription_start_site | - | 10136 | 10136 | -1040 | 28403 | AN7335 |
| 2402 | CONTIG128 | 10894 | 11458 | 1.23 | 5.88E-02 | transcription_start_site | - | 9152  | 9152  | -2024 | 28404 | AN7335 |
| 2402 | CONTIG128 | 10894 | 11458 | 1.23 | 5.88E-02 | transcription_start_site | + | 12006 | 12006 | -830  | 28405 | AN7336 |
| 2886 | CONTIG128 | 18226 | 18745 | 1.01 | 1.33E-01 | transcription_start_site | + | 18052 | 18052 | 433   | 28406 | AN7338 |
| 2988 | CONTIG128 | 15921 | 16645 | 0.93 | 1.93E-01 | transcription_start_site | + | 18052 | 18052 | -1769 | 28406 | AN7338 |
| 2886 | CONTIG128 | 18226 | 18745 | 1.01 | 1.33E-01 | transcription_start_site | + | 19460 | 19460 | -974  | 28407 | AN7339 |
| 2988 | CONTIG128 | 15921 | 16645 | 0.93 | 1.93E-01 | transcription_start_site | + | 19460 | 19460 | -3177 | 28407 | AN7339 |
| 254  | CONTIG128 | 25356 | 25931 | 2.83 | 0.00E+00 | transcription_start_site | - | 22482 | 22482 | -3161 | 28408 | AN7340 |
| 254  | CONTIG128 | 25356 | 25931 | 2.83 | 0.00E+00 | transcription_start_site | - | 22259 | 22259 | -3384 | 28409 | AN7340 |
| 254  | CONTIG128 | 25356 | 25931 | 2.83 | 0.00E+00 | transcription_start_site | - | 21486 | 21486 | -4157 | 28410 | AN7340 |
| 254  | CONTIG128 | 25356 | 25931 | 2.83 | 0.00E+00 | transcription_start_site | - | 21350 | 21350 | -4293 | 28411 | AN7340 |
| 254  | CONTIG128 | 25356 | 25931 | 2.83 | 0.00E+00 | transcription_start_site | - | 21205 | 21205 | -4438 | 28412 | AN7340 |
| 254  | CONTIG128 | 25356 | 25931 | 2.83 | 0.00E+00 | transcription_start_site | - | 21017 | 21017 | -4626 | 28413 | AN7340 |
| 254  | CONTIG128 | 25356 | 25931 | 2.83 | 0.00E+00 | transcription_start_site | - | 24966 | 24966 | -677  | 28414 | AN7341 |
| 254  | CONTIG128 | 25356 | 25931 | 2.83 | 0.00E+00 | transcription_start_site | - | 24691 | 24691 | -952  | 28415 | AN7341 |
| 254  | CONTIG128 | 25356 | 25931 | 2.83 | 0.00E+00 | transcription_start_site | - | 24508 | 24508 | -1135 | 28416 | AN7341 |
| 254  | CONTIG128 | 25356 | 25931 | 2.83 | 0.00E+00 | transcription_start_site | - | 24414 | 24414 | -1229 | 28417 | AN7341 |
| 254  | CONTIG128 | 25356 | 25931 | 2.83 | 0.00E+00 | transcription_start_site | - | 24336 | 24336 | -1307 | 28418 | AN7341 |
| 254  | CONTIG128 | 25356 | 25931 | 2.83 | 0.00E+00 | transcription_start_site | - | 23929 | 23929 | -1714 | 28419 | AN7341 |
| 254  | CONTIG128 | 25356 | 25931 | 2.83 | 0.00E+00 | transcription_start_site | + | 27287 | 27287 | -1643 | 28420 | AN7342 |
| 254  | CONTIG128 | 25356 | 25931 | 2.83 | 0.00E+00 | transcription_start_site | + | 27520 | 27520 | -1876 | 28421 | AN7342 |
| 254  | CONTIG128 | 25356 | 25931 | 2.83 | 0.00E+00 | transcription_start_site | + | 28666 | 28666 | -3022 | 28422 | AN7342 |
| 254  | CONTIG128 | 25356 | 25931 | 2.83 | 0.00E+00 | transcription_start_site | + | 29088 | 29088 | -3444 | 28423 | AN7342 |
| 1101 | CONTIG128 | 63078 | 63432 | 1.83 | 3.61E-03 | transcription_start_site | + | 63430 | 63430 | -175  | 28450 | AN7350 |
| 1101 | CONTIG128 | 63078 | 63432 | 1.83 | 3.61E-03 | transcription_start_site | + | 63529 | 63529 | -274  | 28451 | AN7350 |
| 1101 | CONTIG128 | 63078 | 63432 | 1.83 | 3.61E-03 | transcription_start_site | + | 63642 | 63642 | -387  | 28452 | AN7350 |
| 1101 | CONTIG128 | 63078 | 63432 | 1.83 | 3.61E-03 | transcription_start_site | + | 63821 | 63821 | -566  | 28453 | AN7350 |
| 1101 | CONTIG128 | 63078 | 63432 | 1.83 | 3.61E-03 | transcription_start_site | + | 63956 | 63956 | -701  | 28454 | AN7350 |
| 1101 | CONTIG128 | 63078 | 63432 | 1.83 | 3.61E-03 | transcription_start_site | + | 64287 | 64287 | -1032 | 28455 | AN7350 |
| 2840 | CONTIG128 | 64435 | 65019 | 1.04 | 1.07E-01 | transcription_start_site | + | 64287 | 64287 | 440   | 28455 | AN7350 |
| 2840 | CONTIG128 | 64435 | 65019 | 1.04 | 1.07E-01 | transcription_start_site | + | 63956 | 63956 | 771   | 28454 | AN7350 |
| 2840 | CONTIG128 | 64435 | 65019 | 1.04 | 1.07E-01 | transcription_start_site | + | 63821 | 63821 | 906   | 28453 | AN7350 |
| 2840 | CONTIG128 | 64435 | 65019 | 1.04 | 1.07E-01 | transcription_start_site | + | 63642 | 63642 | 1085  | 28452 | AN7350 |
| 2840 | CONTIG128 | 64435 | 65019 | 1.04 | 1.07E-01 | transcription_start_site | + | 63529 | 63529 | 1198  | 28451 | AN7350 |
| 1101 | CONTIG128 | 63078 | 63432 | 1.83 | 3.61E-03 | transcription_start_site | + | 67667 | 67667 | -4412 | 28456 | AN7351 |
| 1101 | CONTIG128 | 63078 | 63432 | 1.83 | 3.61E-03 | transcription_start_site | + | 67885 | 67885 | -4630 | 28457 | AN7351 |
| 1101 | CONTIG128 | 63078 | 63432 | 1.83 | 3.61E-03 | transcription_start_site | + | 67971 | 67971 | -4716 | 28458 | AN7351 |
| 1101 | CONTIG128 | 63078 | 63432 | 1.83 | 3.61E-03 | transcription_start_site | + | 68109 | 68109 | -4854 | 28459 | AN7351 |
| 1101 | CONTIG128 | 63078 | 63432 | 1.83 | 3.61E-03 | transcription_start_site | + | 68210 | 68210 | -4955 | 28460 | AN7351 |
| 2840 | CONTIG128 | 64435 | 65019 | 1.04 | 1.07E-01 | transcription_start_site | + | 67667 | 67667 | -2940 | 28456 | AN7351 |
| 2840 | CONTIG128 | 64435 | 65019 | 1.04 | 1.07E-01 | transcription_start_site | + | 67885 | 67885 | -3158 | 28457 | AN7351 |
| 2840 | CONTIG128 | 64435 | 65019 | 1.04 | 1.07E-01 | transcription_start_site | + | 67971 | 67971 | -3244 | 28458 | AN7351 |
| 2840 | CONTIG128 | 64435 | 65019 | 1.04 | 1.07E-01 | transcription_start_site | + | 68109 | 68109 | -3382 | 28459 | AN7351 |
| 2840 | CONTIG128 | 64435 | 65019 | 1.04 | 1.07E-01 | transcription_start_site | + | 68210 | 68210 | -3483 | 28460 | AN7351 |
| 2840 | CONTIG128 | 64435 | 65019 | 1.04 | 1.07E-01 | transcription_start_site | + | 68462 | 68462 | -3735 | 28461 | AN7351 |
| 2840 | CONTIG128 | 64435 | 65019 | 1.04 | 1.07E-01 | transcription_start_site | + | 68618 | 68618 | -3891 | 28462 | AN7351 |
| 2840 | CONTIG128 | 64435 | 65019 | 1.04 | 1.07E-01 | transcription_start_site | + | 69020 | 69020 | -4293 | 28463 | AN7351 |
| 2888 | CONTIG128 | 70220 | 70484 | 1.01 | 1.44E-01 | transcription_start_site | - | 70636 | 70636 | 284   | 28465 | AN7352 |
| 2888 | CONTIG128 | 70220 | 70484 | 1.01 | 1.44E-01 | transcription_start_site | - | 70893 | 70893 | 541   | 28464 | AN7352 |
| 2888 | CONTIG128 | 70220 | 70484 | 1.01 | 1.44E-01 | transcription_start_site | + | 72972 | 72972 | -2620 | 28466 | AN7353 |
| 2888 | CONTIG128 | 70220 | 70484 | 1.01 | 1.44E-01 | transcription_start_site | + | 73055 | 73055 | -2703 | 28467 | AN7353 |
| 2888 | CONTIG128 | 70220 | 70484 | 1.01 | 1.44E-01 | transcription_start_site | + | 73179 | 73179 | -2827 | 28468 | AN7353 |
| 2888 | CONTIG128 | 70220 | 70484 | 1.01 | 1.44E-01 | transcription_start_site | + | 73500 | 73500 | -3148 | 28469 | AN7353 |
| 2888 | CONTIG128 | 70220 | 70484 | 1.01 | 1.44E-01 | transcription_start_site | + | 73855 | 73855 | -3503 | 28470 | AN7353 |



|      |           |        |        |      |          |                          |   |        |        |       |       |        |
|------|-----------|--------|--------|------|----------|--------------------------|---|--------|--------|-------|-------|--------|
| 2888 | CONTIG128 | 70220  | 70484  | 1.01 | 1.44E-01 | transcription_start_site | + | 74684  | 74684  | -4332 | 28471 | AN7354 |
| 2888 | CONTIG128 | 70220  | 70484  | 1.01 | 1.44E-01 | transcription_start_site | + | 74933  | 74933  | -4581 | 28472 | AN7354 |
| 2888 | CONTIG128 | 70220  | 70484  | 1.01 | 1.44E-01 | transcription_start_site | + | 75147  | 75147  | -4795 | 28473 | AN7354 |
| 2888 | CONTIG128 | 70220  | 70484  | 1.01 | 1.44E-01 | transcription_start_site | + | 75338  | 75338  | -4986 | 28474 | AN7354 |
| 1102 | CONTIG128 | 82745  | 83234  | 1.83 | 3.61E-03 | transcription_start_site | - | 82147  | 82147  | -842  | 28477 | AN7357 |
| 1802 | CONTIG128 | 86180  | 86754  | 1.45 | 1.06E-02 | transcription_start_site | - | 82147  | 82147  | -4320 | 28477 | AN7357 |
| 2155 | CONTIG128 | 86940  | 87429  | 1.31 | 4.36E-02 | transcription_start_site | - | 82147  | 82147  | -5037 | 28477 | AN7357 |
| 1802 | CONTIG128 | 86180  | 86754  | 1.45 | 1.06E-02 | transcription_start_site | - | 85914  | 85914  | -553  | 28478 | AN7358 |
| 1802 | CONTIG128 | 86180  | 86754  | 1.45 | 1.06E-02 | transcription_start_site | - | 85276  | 85276  | -1191 | 28479 | AN7358 |
| 1802 | CONTIG128 | 86180  | 86754  | 1.45 | 1.06E-02 | transcription_start_site | - | 85075  | 85075  | -1392 | 28480 | AN7358 |
| 2155 | CONTIG128 | 86940  | 87429  | 1.31 | 4.36E-02 | transcription_start_site | - | 85914  | 85914  | -1270 | 28478 | AN7358 |
| 2155 | CONTIG128 | 86940  | 87429  | 1.31 | 4.36E-02 | transcription_start_site | - | 85276  | 85276  | -1908 | 28479 | AN7358 |
| 2155 | CONTIG128 | 86940  | 87429  | 1.31 | 4.36E-02 | transcription_start_site | - | 85075  | 85075  | -2109 | 28480 | AN7358 |
| 2155 | CONTIG128 | 86940  | 87429  | 1.31 | 4.36E-02 | transcription_start_site | - | 88339  | 88339  | 1154  | 28482 | AN7359 |
| 2155 | CONTIG128 | 86940  | 87429  | 1.31 | 4.36E-02 | transcription_start_site | + | 91898  | 91898  | -4713 | 28486 | AN7361 |
| 2155 | CONTIG128 | 86940  | 87429  | 1.31 | 4.36E-02 | transcription_start_site | + | 91977  | 91977  | -4792 | 28487 | AN7361 |
| 2155 | CONTIG128 | 86940  | 87429  | 1.31 | 4.36E-02 | transcription_start_site | + | 92052  | 92052  | -4867 | 28488 | AN7361 |
| 2704 | CONTIG128 | 100811 | 101225 | 1.12 | 9.24E-02 | transcription_start_site | - | 99087  | 99087  | -1931 | 28491 | AN7362 |
| 2704 | CONTIG128 | 100811 | 101225 | 1.12 | 9.24E-02 | transcription_start_site | - | 98758  | 98758  | -2260 | 28492 | AN7362 |
| 2704 | CONTIG128 | 100811 | 101225 | 1.12 | 9.24E-02 | transcription_start_site | - | 97928  | 97928  | -3090 | 28493 | AN7362 |
| 2704 | CONTIG128 | 100811 | 101225 | 1.12 | 9.24E-02 | transcription_start_site | - | 97625  | 97625  | -3393 | 28494 | AN7362 |
| 2704 | CONTIG128 | 100811 | 101225 | 1.12 | 9.24E-02 | transcription_start_site | - | 96518  | 96518  | -4500 | 28495 | AN7362 |
| 2704 | CONTIG128 | 100811 | 101225 | 1.12 | 9.24E-02 | transcription_start_site | - | 96135  | 96135  | -4883 | 28496 | AN7362 |
| 2704 | CONTIG128 | 100811 | 101225 | 1.12 | 9.24E-02 | transcription_start_site | + | 105549 | 105549 | -4531 | 28499 | AN7364 |
| 2950 | CONTIG128 | 105526 | 106120 | 0.97 | 1.50E-01 | transcription_start_site | + | 105549 | 105549 | 274   | 28499 | AN7364 |
| 487  | CONTIG128 | 107561 | 108148 | 2.46 | 0.00E+00 | transcription_start_site | - | 107942 | 107942 | 87    | 28500 | AN7365 |
| 487  | CONTIG128 | 107561 | 108148 | 2.46 | 0.00E+00 | transcription_start_site | - | 107658 | 107658 | -196  | 28501 | AN7365 |
| 487  | CONTIG128 | 107561 | 108148 | 2.46 | 0.00E+00 | transcription_start_site | - | 107360 | 107360 | -494  | 28502 | AN7365 |
| 487  | CONTIG128 | 107561 | 108148 | 2.46 | 0.00E+00 | transcription_start_site | + | 108562 | 108562 | -707  | 28503 | AN7366 |
| 487  | CONTIG128 | 107561 | 108148 | 2.46 | 0.00E+00 | transcription_start_site | + | 108834 | 108834 | -979  | 28504 | AN7366 |
| 487  | CONTIG128 | 107561 | 108148 | 2.46 | 0.00E+00 | transcription_start_site | + | 109296 | 109296 | -1441 | 28505 | AN7366 |
| 487  | CONTIG128 | 107561 | 108148 | 2.46 | 0.00E+00 | transcription_start_site | + | 109497 | 109497 | -1642 | 28506 | AN7366 |
| 2950 | CONTIG128 | 105526 | 106120 | 0.97 | 1.50E-01 | transcription_start_site | + | 108562 | 108562 | -2739 | 28503 | AN7366 |
| 2950 | CONTIG128 | 105526 | 106120 | 0.97 | 1.50E-01 | transcription_start_site | + | 108834 | 108834 | -3011 | 28504 | AN7366 |
| 2950 | CONTIG128 | 105526 | 106120 | 0.97 | 1.50E-01 | transcription_start_site | + | 109296 | 109296 | -3473 | 28505 | AN7366 |
| 2950 | CONTIG128 | 105526 | 106120 | 0.97 | 1.50E-01 | transcription_start_site | + | 109497 | 109497 | -3674 | 28506 | AN7366 |
| 2953 | CONTIG128 | 124366 | 124625 | 0.97 | 1.66E-01 | transcription_start_site | - | 123421 | 123421 | -1074 | 28512 | AN7370 |
| 2953 | CONTIG128 | 124366 | 124625 | 0.97 | 1.66E-01 | transcription_start_site | - | 123267 | 123267 | -1228 | 28513 | AN7370 |
| 2953 | CONTIG128 | 124366 | 124625 | 0.97 | 1.66E-01 | transcription_start_site | - | 122615 | 122615 | -1880 | 28514 | AN7370 |
| 2953 | CONTIG128 | 124366 | 124625 | 0.97 | 1.66E-01 | transcription_start_site | - | 122503 | 122503 | -1992 | 28515 | AN7370 |
| 2953 | CONTIG128 | 124366 | 124625 | 0.97 | 1.66E-01 | transcription_start_site | - | 122190 | 122190 | -2305 | 28516 | AN7370 |
| 2953 | CONTIG128 | 124366 | 124625 | 0.97 | 1.66E-01 | transcription_start_site | - | 122047 | 122047 | -2448 | 28517 | AN7370 |
| 2953 | CONTIG128 | 124366 | 124625 | 0.97 | 1.66E-01 | transcription_start_site | - | 121630 | 121630 | -2865 | 28518 | AN7370 |
| 2953 | CONTIG128 | 124366 | 124625 | 0.97 | 1.66E-01 | transcription_start_site | - | 121227 | 121227 | -3268 | 28519 | AN7370 |
| 2989 | CONTIG128 | 125946 | 126361 | 0.93 | 1.93E-01 | transcription_start_site | - | 123421 | 123421 | -2732 | 28512 | AN7370 |
| 2989 | CONTIG128 | 125946 | 126361 | 0.93 | 1.93E-01 | transcription_start_site | - | 123267 | 123267 | -2886 | 28513 | AN7370 |
| 2989 | CONTIG128 | 125946 | 126361 | 0.93 | 1.93E-01 | transcription_start_site | - | 122615 | 122615 | -3538 | 28514 | AN7370 |
| 2989 | CONTIG128 | 125946 | 126361 | 0.93 | 1.93E-01 | transcription_start_site | - | 122503 | 122503 | -3650 | 28515 | AN7370 |
| 2989 | CONTIG128 | 125946 | 126361 | 0.93 | 1.93E-01 | transcription_start_site | - | 122190 | 122190 | -3963 | 28516 | AN7370 |
| 2989 | CONTIG128 | 125946 | 126361 | 0.93 | 1.93E-01 | transcription_start_site | - | 122047 | 122047 | -4106 | 28517 | AN7370 |
| 2989 | CONTIG128 | 125946 | 126361 | 0.93 | 1.93E-01 | transcription_start_site | - | 121630 | 121630 | -4523 | 28518 | AN7370 |
| 2989 | CONTIG128 | 125946 | 126361 | 0.93 | 1.93E-01 | transcription_start_site | - | 121227 | 121227 | -4926 | 28519 | AN7370 |
| 2953 | CONTIG128 | 124366 | 124625 | 0.97 | 1.66E-01 | transcription_start_site | + | 124198 | 124198 | 297   | 28520 | AN7371 |
| 2953 | CONTIG128 | 124366 | 124625 | 0.97 | 1.66E-01 | transcription_start_site | + | 125165 | 125165 | -669  | 28521 | AN7371 |
| 2989 | CONTIG128 | 125946 | 126361 | 0.93 | 1.93E-01 | transcription_start_site | + | 125165 | 125165 | 988   | 28521 | AN7371 |
| 1614 | CONTIG128 | 135232 | 135506 | 1.53 | 1.57E-02 | transcription_start_site | - | 135149 | 135149 | -220  | 28525 | AN7374 |
| 1614 | CONTIG128 | 135232 | 135506 | 1.53 | 1.57E-02 | transcription_start_site | - | 134688 | 134688 | -681  | 28526 | AN7374 |

|      |           |        |        |      |          |                          |   |        |        |       |       |        |
|------|-----------|--------|--------|------|----------|--------------------------|---|--------|--------|-------|-------|--------|
| 1614 | CONTIG128 | 135232 | 135506 | 1.53 | 1.57E-02 | transcription_start_site | + | 135576 | 135576 | -207  | 28527 | AN7375 |
| 1614 | CONTIG128 | 135232 | 135506 | 1.53 | 1.57E-02 | transcription_start_site | + | 135744 | 135744 | -375  | 28528 | AN7375 |
| 1614 | CONTIG128 | 135232 | 135506 | 1.53 | 1.57E-02 | transcription_start_site | + | 136915 | 136915 | -1546 | 28529 | AN7375 |
| 1614 | CONTIG128 | 135232 | 135506 | 1.53 | 1.57E-02 | transcription_start_site | + | 137082 | 137082 | -1713 | 28530 | AN7375 |
| 1614 | CONTIG128 | 135232 | 135506 | 1.53 | 1.57E-02 | transcription_start_site | + | 139292 | 139292 | -3923 | 28532 | AN7377 |
| 1614 | CONTIG128 | 135232 | 135506 | 1.53 | 1.57E-02 | transcription_start_site | + | 139361 | 139361 | -3992 | 28533 | AN7377 |
| 1378 | CONTIG128 | 152858 | 153362 | 1.64 | 8.81E-03 | transcription_start_site | - | 147991 | 147991 | -5119 | 28540 | AN7380 |
| 1378 | CONTIG128 | 152858 | 153362 | 1.64 | 8.81E-03 | transcription_start_site | + | 152903 | 152903 | 207   | 28546 | AN7382 |
| 1378 | CONTIG128 | 152858 | 153362 | 1.64 | 8.81E-03 | transcription_start_site | + | 153872 | 153872 | -762  | 28547 | AN7382 |
| 2156 | CONTIG128 | 154818 | 155237 | 1.31 | 4.36E-02 | transcription_start_site | + | 153872 | 153872 | 1155  | 28547 | AN7382 |
| 2156 | CONTIG128 | 154818 | 155237 | 1.31 | 4.36E-02 | transcription_start_site | - | 156023 | 156023 | 995   | 28548 | AN7383 |
| 2841 | CONTIG128 | 156470 | 156739 | 1.04 | 1.25E-01 | transcription_start_site | - | 156023 | 156023 | -581  | 28548 | AN7383 |
| 2156 | CONTIG128 | 154818 | 155237 | 1.31 | 4.36E-02 | transcription_start_site | + | 158734 | 158734 | -3706 | 28549 | AN7384 |
| 2156 | CONTIG128 | 154818 | 155237 | 1.31 | 4.36E-02 | transcription_start_site | + | 158832 | 158832 | -3804 | 28550 | AN7384 |
| 2156 | CONTIG128 | 154818 | 155237 | 1.31 | 4.36E-02 | transcription_start_site | + | 159338 | 159338 | -4310 | 28551 | AN7384 |
| 2156 | CONTIG128 | 154818 | 155237 | 1.31 | 4.36E-02 | transcription_start_site | + | 159573 | 159573 | -4545 | 28552 | AN7384 |
| 2841 | CONTIG128 | 156470 | 156739 | 1.04 | 1.25E-01 | transcription_start_site | + | 158734 | 158734 | -2129 | 28549 | AN7384 |
| 2841 | CONTIG128 | 156470 | 156739 | 1.04 | 1.25E-01 | transcription_start_site | + | 158832 | 158832 | -2227 | 28550 | AN7384 |
| 2841 | CONTIG128 | 156470 | 156739 | 1.04 | 1.25E-01 | transcription_start_site | + | 159338 | 159338 | -2733 | 28551 | AN7384 |
| 2841 | CONTIG128 | 156470 | 156739 | 1.04 | 1.25E-01 | transcription_start_site | + | 159573 | 159573 | -2968 | 28552 | AN7384 |
| 852  | CONTIG128 | 162676 | 162965 | 2.05 | 1.01E-03 | transcription_start_site | - | 160932 | 160932 | -1888 | 28553 | AN7385 |
| 2773 | CONTIG128 | 164551 | 165650 | 1.08 | 8.36E-02 | transcription_start_site | - | 160932 | 160932 | -4168 | 28553 | AN7385 |
| 852  | CONTIG128 | 162676 | 162965 | 2.05 | 1.01E-03 | transcription_start_site | + | 162950 | 162950 | -129  | 28554 | AN7386 |
| 852  | CONTIG128 | 162676 | 162965 | 2.05 | 1.01E-03 | transcription_start_site | + | 163436 | 163436 | -615  | 28555 | AN7386 |
| 852  | CONTIG128 | 162676 | 162965 | 2.05 | 1.01E-03 | transcription_start_site | + | 163729 | 163729 | -908  | 28556 | AN7386 |
| 2773 | CONTIG128 | 164551 | 165650 | 1.08 | 8.36E-02 | transcription_start_site | + | 163729 | 163729 | 1371  | 28556 | AN7386 |
| 2773 | CONTIG128 | 164551 | 165650 | 1.08 | 8.36E-02 | transcription_start_site | - | 165112 | 165112 | 11    | 28557 | AN7387 |
| 2773 | CONTIG128 | 164551 | 165650 | 1.08 | 8.36E-02 | transcription_start_site | - | 164505 | 164505 | -595  | 28558 | AN7387 |
| 852  | CONTIG128 | 162676 | 162965 | 2.05 | 1.01E-03 | transcription_start_site | + | 165783 | 165783 | -2962 | 28559 | AN7388 |
| 2773 | CONTIG128 | 164551 | 165650 | 1.08 | 8.36E-02 | transcription_start_site | + | 165783 | 165783 | -682  | 28559 | AN7388 |
| 2070 | CONTIG128 | 175069 | 175858 | 1.34 | 3.70E-02 | transcription_start_site | - | 172445 | 172445 | -3018 | 28560 | AN7389 |
| 2070 | CONTIG128 | 175069 | 175858 | 1.34 | 3.70E-02 | transcription_start_site | - | 172133 | 172133 | -3330 | 28561 | AN7389 |
| 2070 | CONTIG128 | 175069 | 175858 | 1.34 | 3.70E-02 | transcription_start_site | + | 175977 | 175977 | -513  | 28562 | AN7390 |
| 2070 | CONTIG128 | 175069 | 175858 | 1.34 | 3.70E-02 | transcription_start_site | + | 176581 | 176581 | -1117 | 28563 | AN7390 |
| 2070 | CONTIG128 | 175069 | 175858 | 1.34 | 3.70E-02 | transcription_start_site | + | 176786 | 176786 | -1322 | 28564 | AN7390 |
| 2070 | CONTIG128 | 175069 | 175858 | 1.34 | 3.70E-02 | transcription_start_site | + | 179986 | 179986 | -4522 | 28568 | AN7392 |
| 2070 | CONTIG128 | 175069 | 175858 | 1.34 | 3.70E-02 | transcription_start_site | + | 180110 | 180110 | -4646 | 28569 | AN7392 |
| 2070 | CONTIG128 | 175069 | 175858 | 1.34 | 3.70E-02 | transcription_start_site | + | 180610 | 180610 | -5146 | 28570 | AN7392 |
| 2889 | CONTIG128 | 186317 | 186591 | 1.01 | 1.44E-01 | transcription_start_site | - | 182759 | 182759 | -3695 | 28572 | AN7393 |
| 2889 | CONTIG128 | 186317 | 186591 | 1.01 | 1.44E-01 | transcription_start_site | - | 182135 | 182135 | -4319 | 28573 | AN7393 |
| 2889 | CONTIG128 | 186317 | 186591 | 1.01 | 1.44E-01 | transcription_start_site | + | 185495 | 185495 | 959   | 28577 | AN7394 |
| 105  | CONTIG128 | 187892 | 188161 | 3.21 | 0.00E+00 | transcription_start_site | - | 187491 | 187491 | -535  | 28578 | AN7395 |
| 105  | CONTIG128 | 187892 | 188161 | 3.21 | 0.00E+00 | transcription_start_site | - | 187366 | 187366 | -660  | 28579 | AN7395 |
| 105  | CONTIG128 | 187892 | 188161 | 3.21 | 0.00E+00 | transcription_start_site | - | 187177 | 187177 | -849  | 28580 | AN7395 |
| 105  | CONTIG128 | 187892 | 188161 | 3.21 | 0.00E+00 | transcription_start_site | - | 187094 | 187094 | -932  | 28581 | AN7395 |
| 105  | CONTIG128 | 187892 | 188161 | 3.21 | 0.00E+00 | transcription_start_site | - | 186537 | 186537 | -1489 | 28582 | AN7395 |
| 105  | CONTIG128 | 187892 | 188161 | 3.21 | 0.00E+00 | transcription_start_site | - | 186417 | 186417 | -1609 | 28583 | AN7395 |
| 2889 | CONTIG128 | 186317 | 186591 | 1.01 | 1.44E-01 | transcription_start_site | - | 186417 | 186417 | -37   | 28583 | AN7395 |
| 2889 | CONTIG128 | 186317 | 186591 | 1.01 | 1.44E-01 | transcription_start_site | - | 186537 | 186537 | 83    | 28582 | AN7395 |
| 2889 | CONTIG128 | 186317 | 186591 | 1.01 | 1.44E-01 | transcription_start_site | - | 187094 | 187094 | 640   | 28581 | AN7395 |
| 2889 | CONTIG128 | 186317 | 186591 | 1.01 | 1.44E-01 | transcription_start_site | - | 187177 | 187177 | 723   | 28580 | AN7395 |
| 2889 | CONTIG128 | 186317 | 186591 | 1.01 | 1.44E-01 | transcription_start_site | - | 187366 | 187366 | 912   | 28579 | AN7395 |
| 2889 | CONTIG128 | 186317 | 186591 | 1.01 | 1.44E-01 | transcription_start_site | - | 187491 | 187491 | 1037  | 28578 | AN7395 |
| 2951 | CONTIG128 | 206045 | 207050 | 0.97 | 1.50E-01 | transcription_start_site | - | 203385 | 203385 | -3162 | 28594 | AN7398 |
| 2951 | CONTIG128 | 206045 | 207050 | 0.97 | 1.50E-01 | transcription_start_site | - | 203189 | 203189 | -3358 | 28595 | AN7398 |
| 2951 | CONTIG128 | 206045 | 207050 | 0.97 | 1.50E-01 | transcription_start_site | - | 203122 | 203122 | -3425 | 28596 | AN7398 |
| 2951 | CONTIG128 | 206045 | 207050 | 0.97 | 1.50E-01 | transcription_start_site | - | 202889 | 202889 | -3658 | 28597 | AN7398 |

|      |           |        |        |      |          |                          |   |        |        |       |       |        |
|------|-----------|--------|--------|------|----------|--------------------------|---|--------|--------|-------|-------|--------|
| 2951 | CONTIG128 | 206045 | 207050 | 0.97 | 1.50E-01 | transcription_start_site | - | 202701 | 202701 | -3846 | 28598 | AN7398 |
| 2951 | CONTIG128 | 206045 | 207050 | 0.97 | 1.50E-01 | transcription_start_site | - | 202649 | 202649 | -3898 | 28599 | AN7398 |
| 2951 | CONTIG128 | 206045 | 207050 | 0.97 | 1.50E-01 | transcription_start_site | - | 202374 | 202374 | -4173 | 28600 | AN7398 |
| 2951 | CONTIG128 | 206045 | 207050 | 0.97 | 1.50E-01 | transcription_start_site | - | 206578 | 206578 | 30    | 28601 | AN7399 |
| 2951 | CONTIG128 | 206045 | 207050 | 0.97 | 1.50E-01 | transcription_start_site | - | 205464 | 205464 | -1083 | 28602 | AN7399 |
| 2951 | CONTIG128 | 206045 | 207050 | 0.97 | 1.50E-01 | transcription_start_site | + | 208326 | 208326 | -1778 | 28603 | AN7400 |
| 2951 | CONTIG128 | 206045 | 207050 | 0.97 | 1.50E-01 | transcription_start_site | + | 208781 | 208781 | -2233 | 28604 | AN7400 |
| 2951 | CONTIG128 | 206045 | 207050 | 0.97 | 1.50E-01 | transcription_start_site | + | 209087 | 209087 | -2539 | 28605 | AN7400 |
| 2951 | CONTIG128 | 206045 | 207050 | 0.97 | 1.50E-01 | transcription_start_site | + | 209266 | 209266 | -2718 | 28606 | AN7400 |
| 2951 | CONTIG128 | 206045 | 207050 | 0.97 | 1.50E-01 | transcription_start_site | + | 209436 | 209436 | -2888 | 28607 | AN7400 |
| 2951 | CONTIG128 | 206045 | 207050 | 0.97 | 1.50E-01 | transcription_start_site | + | 209738 | 209738 | -3190 | 28608 | AN7400 |
| 2951 | CONTIG128 | 206045 | 207050 | 0.97 | 1.50E-01 | transcription_start_site | + | 210332 | 210332 | -3784 | 28609 | AN7400 |
| 1008 | CONTIG128 | 227030 | 227300 | 1.9  | 2.22E-03 | transcription_start_site | - | 226217 | 226217 | -948  | 28631 | AN7406 |
| 1008 | CONTIG128 | 227030 | 227300 | 1.9  | 2.22E-03 | transcription_start_site | - | 226116 | 226116 | -1049 | 28632 | AN7406 |
| 1008 | CONTIG128 | 227030 | 227300 | 1.9  | 2.22E-03 | transcription_start_site | - | 225718 | 225718 | -1447 | 28633 | AN7406 |
| 1008 | CONTIG128 | 227030 | 227300 | 1.9  | 2.22E-03 | transcription_start_site | - | 225324 | 225324 | -1841 | 28634 | AN7406 |
| 1008 | CONTIG128 | 227030 | 227300 | 1.9  | 2.22E-03 | transcription_start_site | - | 225088 | 225088 | -2077 | 28635 | AN7406 |
| 1008 | CONTIG128 | 227030 | 227300 | 1.9  | 2.22E-03 | transcription_start_site | + | 227071 | 227071 | 94    | 28637 | AN7407 |
| 1008 | CONTIG128 | 227030 | 227300 | 1.9  | 2.22E-03 | transcription_start_site | + | 227393 | 227393 | -228  | 28638 | AN7407 |
| 1008 | CONTIG128 | 227030 | 227300 | 1.9  | 2.22E-03 | transcription_start_site | + | 226845 | 226845 | 320   | 28636 | AN7407 |
| 1008 | CONTIG128 | 227030 | 227300 | 1.9  | 2.22E-03 | transcription_start_site | + | 227777 | 227777 | -612  | 28639 | AN7407 |
| 1008 | CONTIG128 | 227030 | 227300 | 1.9  | 2.22E-03 | transcription_start_site | + | 228189 | 228189 | -1024 | 28640 | AN7407 |
| 2071 | CONTIG128 | 246984 | 247328 | 1.34 | 3.70E-02 | transcription_start_site | - | 245513 | 245513 | -1643 | 28664 | AN7414 |
| 2071 | CONTIG128 | 246984 | 247328 | 1.34 | 3.70E-02 | transcription_start_site | - | 244168 | 244168 | -2988 | 28665 | AN7414 |
| 1217 | CONTIG129 | 91053  | 91569  | 1.75 | 2.62E-02 | transcription_start_site | - | 89332  | 89332  | -1979 | 28797 | AN7451 |
| 1217 | CONTIG129 | 91053  | 91569  | 1.75 | 2.62E-02 | transcription_start_site | - | 88949  | 88949  | -2362 | 28798 | AN7451 |
| 1217 | CONTIG129 | 91053  | 91569  | 1.75 | 2.62E-02 | transcription_start_site | - | 86058  | 86058  | -5253 | 28799 | AN7451 |
| 2648 | CONTIG129 | 94058  | 94421  | 1.15 | 1.93E-01 | transcription_start_site | - | 89332  | 89332  | -4907 | 28797 | AN7451 |
| 1217 | CONTIG129 | 91053  | 91569  | 1.75 | 2.62E-02 | transcription_start_site | + | 91664  | 91664  | -353  | 28801 | AN7452 |
| 1217 | CONTIG129 | 91053  | 91569  | 1.75 | 2.62E-02 | transcription_start_site | + | 91828  | 91828  | -517  | 28802 | AN7452 |
| 1217 | CONTIG129 | 91053  | 91569  | 1.75 | 2.62E-02 | transcription_start_site | + | 91907  | 91907  | -596  | 28803 | AN7452 |
| 1217 | CONTIG129 | 91053  | 91569  | 1.75 | 2.62E-02 | transcription_start_site | + | 92178  | 92178  | -867  | 28804 | AN7452 |
| 1217 | CONTIG129 | 91053  | 91569  | 1.75 | 2.62E-02 | transcription_start_site | + | 92368  | 92368  | -1057 | 28805 | AN7452 |
| 1217 | CONTIG129 | 91053  | 91569  | 1.75 | 2.62E-02 | transcription_start_site | + | 92516  | 92516  | -1205 | 28806 | AN7452 |
| 1217 | CONTIG129 | 91053  | 91569  | 1.75 | 2.62E-02 | transcription_start_site | + | 92877  | 92877  | -1566 | 28807 | AN7452 |
| 1217 | CONTIG129 | 91053  | 91569  | 1.75 | 2.62E-02 | transcription_start_site | + | 92994  | 92994  | -1683 | 28808 | AN7452 |
| 302  | CONTIG129 | 98483  | 98757  | 2.76 | 2.16E-04 | transcription_start_site | - | 97868  | 97868  | -752  | 28809 | AN7453 |
| 302  | CONTIG129 | 98483  | 98757  | 2.76 | 2.16E-04 | transcription_start_site | - | 97718  | 97718  | -902  | 28810 | AN7453 |
| 302  | CONTIG129 | 98483  | 98757  | 2.76 | 2.16E-04 | transcription_start_site | - | 96486  | 96486  | -2134 | 28811 | AN7453 |
| 273  | CONTIG129 | 95113  | 95377  | 2.8  | 2.39E-04 | transcription_start_site | + | 98718  | 98718  | -3473 | 28812 | AN7454 |
| 273  | CONTIG129 | 95113  | 95377  | 2.8  | 2.39E-04 | transcription_start_site | + | 100252 | 100252 | -5007 | 28813 | AN7454 |
| 302  | CONTIG129 | 98483  | 98757  | 2.76 | 2.16E-04 | transcription_start_site | + | 98718  | 98718  | -98   | 28812 | AN7454 |
| 302  | CONTIG129 | 98483  | 98757  | 2.76 | 2.16E-04 | transcription_start_site | + | 100252 | 100252 | -1632 | 28813 | AN7454 |
| 2648 | CONTIG129 | 94058  | 94421  | 1.15 | 1.93E-01 | transcription_start_site | + | 98718  | 98718  | -4478 | 28812 | AN7454 |
| 355  | CONTIG129 | 124278 | 124627 | 2.67 | 5.64E-04 | transcription_start_site | - | 122814 | 122814 | -1638 | 28840 | AN7463 |
| 355  | CONTIG129 | 124278 | 124627 | 2.67 | 5.64E-04 | transcription_start_site | - | 122592 | 122592 | -1860 | 28841 | AN7463 |
| 355  | CONTIG129 | 124278 | 124627 | 2.67 | 5.64E-04 | transcription_start_site | - | 122207 | 122207 | -2245 | 28842 | AN7463 |
| 355  | CONTIG129 | 124278 | 124627 | 2.67 | 5.64E-04 | transcription_start_site | - | 121561 | 121561 | -2891 | 28843 | AN7463 |
| 1218 | CONTIG129 | 141606 | 141875 | 1.75 | 2.62E-02 | transcription_start_site | - | 137558 | 137558 | -4182 | 28855 | AN7467 |
| 1218 | CONTIG129 | 141606 | 141875 | 1.75 | 2.62E-02 | transcription_start_site | - | 137336 | 137336 | -4404 | 28856 | AN7467 |
| 1218 | CONTIG129 | 141606 | 141875 | 1.75 | 2.62E-02 | transcription_start_site | - | 137267 | 137267 | -4473 | 28857 | AN7467 |
| 1218 | CONTIG129 | 141606 | 141875 | 1.75 | 2.62E-02 | transcription_start_site | - | 136910 | 136910 | -4830 | 28858 | AN7467 |
| 1977 | CONTIG129 | 138008 | 138743 | 1.38 | 7.25E-02 | transcription_start_site | - | 137558 | 137558 | -817  | 28855 | AN7467 |
| 1977 | CONTIG129 | 138008 | 138743 | 1.38 | 7.25E-02 | transcription_start_site | - | 137336 | 137336 | -1039 | 28856 | AN7467 |
| 1977 | CONTIG129 | 138008 | 138743 | 1.38 | 7.25E-02 | transcription_start_site | - | 137267 | 137267 | -1108 | 28857 | AN7467 |
| 1977 | CONTIG129 | 138008 | 138743 | 1.38 | 7.25E-02 | transcription_start_site | - | 136910 | 136910 | -1465 | 28858 | AN7467 |
| 1977 | CONTIG129 | 138008 | 138743 | 1.38 | 7.25E-02 | transcription_start_site | + | 138618 | 138618 | -242  | 28859 | AN7468 |

|                |        |        |      |          |                          |   |        |        |       |       |        |
|----------------|--------|--------|------|----------|--------------------------|---|--------|--------|-------|-------|--------|
| 1977 CONTIG129 | 138008 | 138743 | 1.38 | 7.25E-02 | transcription_start_site | + | 138929 | 138929 | -553  | 28860 | AN7468 |
| 1218 CONTIG129 | 141606 | 141875 | 1.75 | 2.62E-02 | transcription_start_site | + | 141671 | 141671 | 69    | 28861 | AN7469 |
| 1218 CONTIG129 | 141606 | 141875 | 1.75 | 2.62E-02 | transcription_start_site | + | 141852 | 141852 | -111  | 28862 | AN7469 |
| 1218 CONTIG129 | 141606 | 141875 | 1.75 | 2.62E-02 | transcription_start_site | + | 142157 | 142157 | -416  | 28863 | AN7469 |
| 1977 CONTIG129 | 138008 | 138743 | 1.38 | 7.25E-02 | transcription_start_site | + | 141671 | 141671 | -3295 | 28861 | AN7469 |
| 1977 CONTIG129 | 138008 | 138743 | 1.38 | 7.25E-02 | transcription_start_site | + | 141852 | 141852 | -3476 | 28862 | AN7469 |
| 1977 CONTIG129 | 138008 | 138743 | 1.38 | 7.25E-02 | transcription_start_site | + | 142157 | 142157 | -3781 | 28863 | AN7469 |
| 1218 CONTIG129 | 141606 | 141875 | 1.75 | 2.62E-02 | transcription_start_site | + | 142757 | 142757 | -1016 | 28864 | AN7470 |
| 1218 CONTIG129 | 141606 | 141875 | 1.75 | 2.62E-02 | transcription_start_site | + | 143087 | 143087 | -1346 | 28865 | AN7470 |
| 1218 CONTIG129 | 141606 | 141875 | 1.75 | 2.62E-02 | transcription_start_site | + | 143751 | 143751 | -2010 | 28866 | AN7470 |
| 1977 CONTIG129 | 138008 | 138743 | 1.38 | 7.25E-02 | transcription_start_site | + | 142757 | 142757 | -4381 | 28864 | AN7470 |
| 1977 CONTIG129 | 138008 | 138743 | 1.38 | 7.25E-02 | transcription_start_site | + | 143087 | 143087 | -4711 | 28865 | AN7470 |
| 2381 CONTIG129 | 144761 | 145040 | 1.24 | 1.44E-01 | transcription_start_site | - | 145499 | 145499 | 598   | 28873 | AN7471 |
| 2381 CONTIG129 | 144761 | 145040 | 1.24 | 1.44E-01 | transcription_start_site | - | 144154 | 144154 | -746  | 28874 | AN7471 |
| 2381 CONTIG129 | 144761 | 145040 | 1.24 | 1.44E-01 | transcription_start_site | - | 145857 | 145857 | 956   | 28872 | AN7471 |
| 2381 CONTIG129 | 144761 | 145040 | 1.24 | 1.44E-01 | transcription_start_site | + | 147155 | 147155 | -2254 | 28875 | AN7472 |
| 2381 CONTIG129 | 144761 | 145040 | 1.24 | 1.44E-01 | transcription_start_site | + | 147572 | 147572 | -2671 | 28876 | AN7472 |
| 2381 CONTIG129 | 144761 | 145040 | 1.24 | 1.44E-01 | transcription_start_site | + | 148664 | 148664 | -3763 | 28877 | AN7472 |
| 1773 CONTIG129 | 160961 | 161450 | 1.47 | 5.05E-02 | transcription_start_site | - | 156796 | 156796 | -4409 | 28884 | AN7474 |
| 1773 CONTIG129 | 160961 | 161450 | 1.47 | 5.05E-02 | transcription_start_site | - | 156489 | 156489 | -4716 | 28885 | AN7474 |
| 1773 CONTIG129 | 160961 | 161450 | 1.47 | 5.05E-02 | transcription_start_site | + | 161111 | 161111 | 94    | 28887 | AN7475 |
| 1773 CONTIG129 | 160961 | 161450 | 1.47 | 5.05E-02 | transcription_start_site | + | 161650 | 161650 | -444  | 28888 | AN7475 |
| 1773 CONTIG129 | 160961 | 161450 | 1.47 | 5.05E-02 | transcription_start_site | + | 164137 | 164137 | -2931 | 28889 | AN7476 |
| 1773 CONTIG129 | 160961 | 161450 | 1.47 | 5.05E-02 | transcription_start_site | + | 164499 | 164499 | -3293 | 28890 | AN7476 |
| 1773 CONTIG129 | 160961 | 161450 | 1.47 | 5.05E-02 | transcription_start_site | + | 164648 | 164648 | -3442 | 28891 | AN7476 |
| 827 CONTIG129  | 168301 | 168590 | 2.07 | 7.85E-03 | transcription_start_site | - | 167333 | 167333 | -1112 | 28892 | AN7477 |
| 827 CONTIG129  | 168301 | 168590 | 2.07 | 7.85E-03 | transcription_start_site | - | 167075 | 167075 | -1370 | 28893 | AN7477 |
| 827 CONTIG129  | 168301 | 168590 | 2.07 | 7.85E-03 | transcription_start_site | + | 170343 | 170343 | -1897 | 28894 | AN7478 |
| 827 CONTIG129  | 168301 | 168590 | 2.07 | 7.85E-03 | transcription_start_site | + | 171025 | 171025 | -2579 | 28895 | AN7478 |
| 1558 CONTIG129 | 175211 | 175500 | 1.56 | 5.22E-02 | transcription_start_site | - | 173975 | 173975 | -1380 | 28896 | AN7479 |
| 1558 CONTIG129 | 175211 | 175500 | 1.56 | 5.22E-02 | transcription_start_site | - | 172264 | 172264 | -3091 | 28897 | AN7479 |
| 1558 CONTIG129 | 175211 | 175500 | 1.56 | 5.22E-02 | transcription_start_site | + | 176307 | 176307 | -951  | 28898 | AN7480 |
| 1558 CONTIG129 | 175211 | 175500 | 1.56 | 5.22E-02 | transcription_start_site | + | 179644 | 179644 | -4288 | 28899 | AN7481 |
| 1558 CONTIG129 | 175211 | 175500 | 1.56 | 5.22E-02 | transcription_start_site | + | 179820 | 179820 | -4464 | 28900 | AN7481 |
| 177 CONTIG129  | 188271 | 189285 | 2.99 | 0.00E+00 | transcription_start_site | - | 184016 | 184016 | -4762 | 28901 | AN7482 |
| 442 CONTIG129  | 184971 | 185245 | 2.53 | 1.01E-03 | transcription_start_site | - | 184016 | 184016 | -1092 | 28901 | AN7482 |
| 924 CONTIG129  | 186546 | 187107 | 1.98 | 4.81E-03 | transcription_start_site | - | 184016 | 184016 | -2810 | 28901 | AN7482 |
| 1048 CONTIG129 | 198987 | 199266 | 1.88 | 1.57E-02 | transcription_start_site | - | 196265 | 196265 | -2861 | 28902 | AN7483 |
| 1048 CONTIG129 | 198987 | 199266 | 1.88 | 1.57E-02 | transcription_start_site | + | 200559 | 200559 | -1432 | 28905 | AN7485 |
| 1048 CONTIG129 | 198987 | 199266 | 1.88 | 1.57E-02 | transcription_start_site | + | 200851 | 200851 | -1724 | 28906 | AN7485 |
| 1048 CONTIG129 | 198987 | 199266 | 1.88 | 1.57E-02 | transcription_start_site | + | 201033 | 201033 | -1906 | 28907 | AN7485 |
| 1048 CONTIG129 | 198987 | 199266 | 1.88 | 1.57E-02 | transcription_start_site | + | 201827 | 201827 | -2700 | 28908 | AN7485 |
| 1048 CONTIG129 | 198987 | 199266 | 1.88 | 1.57E-02 | transcription_start_site | + | 202539 | 202539 | -3412 | 28909 | AN7485 |
| 2231 CONTIG129 | 212106 | 212380 | 1.29 | 1.25E-01 | transcription_start_site | - | 207725 | 207725 | -4518 | 28916 | AN7488 |
| 2231 CONTIG129 | 212106 | 212380 | 1.29 | 1.25E-01 | transcription_start_site | - | 207549 | 207549 | -4694 | 28917 | AN7488 |
| 2231 CONTIG129 | 212106 | 212380 | 1.29 | 1.25E-01 | transcription_start_site | - | 207370 | 207370 | -4873 | 28918 | AN7488 |
| 2231 CONTIG129 | 212106 | 212380 | 1.29 | 1.25E-01 | transcription_start_site | - | 212740 | 212740 | 497   | 28926 | AN7491 |
| 2231 CONTIG129 | 212106 | 212380 | 1.29 | 1.25E-01 | transcription_start_site | - | 212850 | 212850 | 607   | 28925 | AN7491 |
| 2382 CONTIG129 | 240379 | 240729 | 1.24 | 1.44E-01 | transcription_start_site | + | 240571 | 240571 | -17   | 28948 | AN7500 |
| 2382 CONTIG129 | 240379 | 240729 | 1.24 | 1.44E-01 | transcription_start_site | + | 241453 | 241453 | -899  | 28949 | AN7500 |
| 2382 CONTIG129 | 240379 | 240729 | 1.24 | 1.44E-01 | transcription_start_site | + | 241852 | 241852 | -1298 | 28950 | AN7500 |
| 2382 CONTIG129 | 240379 | 240729 | 1.24 | 1.44E-01 | transcription_start_site | + | 242058 | 242058 | -1504 | 28951 | AN7500 |
| 2382 CONTIG129 | 240379 | 240729 | 1.24 | 1.44E-01 | transcription_start_site | + | 243007 | 243007 | -2453 | 28952 | AN7500 |
| 1550 CONTIG129 | 269193 | 269542 | 1.56 | 3.33E-02 | transcription_start_site | - | 264792 | 264792 | -4575 | 28974 | AN7506 |
| 1978 CONTIG129 | 265971 | 266375 | 1.38 | 7.51E-02 | transcription_start_site | - | 264792 | 264792 | -1381 | 28974 | AN7506 |
| 1219 CONTIG129 | 273381 | 273655 | 1.75 | 2.62E-02 | transcription_start_site | - | 269104 | 269104 | -4414 | 28976 | AN7507 |
| 1219 CONTIG129 | 273381 | 273655 | 1.75 | 2.62E-02 | transcription_start_site | - | 268663 | 268663 | -4855 | 28977 | AN7507 |

|      |           |        |        |      |          |                          |   |        |        |       |       |        |
|------|-----------|--------|--------|------|----------|--------------------------|---|--------|--------|-------|-------|--------|
| 1219 | CONTIG129 | 273381 | 273655 | 1.75 | 2.62E-02 | transcription_start_site | - | 268461 | 268461 | -5057 | 28978 | AN7507 |
| 1550 | CONTIG129 | 269193 | 269542 | 1.56 | 3.33E-02 | transcription_start_site | - | 269104 | 269104 | -263  | 28976 | AN7507 |
| 1550 | CONTIG129 | 269193 | 269542 | 1.56 | 3.33E-02 | transcription_start_site | - | 268663 | 268663 | -704  | 28977 | AN7507 |
| 1550 | CONTIG129 | 269193 | 269542 | 1.56 | 3.33E-02 | transcription_start_site | - | 268461 | 268461 | -906  | 28978 | AN7507 |
| 1550 | CONTIG129 | 269193 | 269542 | 1.56 | 3.33E-02 | transcription_start_site | - | 267682 | 267682 | -1685 | 28979 | AN7507 |
| 422  | CONTIG129 | 278940 | 279369 | 2.57 | 9.51E-04 | transcription_start_site | - | 275975 | 275975 | -3179 | 28980 | AN7508 |
| 686  | CONTIG129 | 276917 | 277191 | 2.21 | 4.61E-03 | transcription_start_site | - | 275975 | 275975 | -1079 | 28980 | AN7508 |
| 747  | CONTIG129 | 278030 | 278539 | 2.16 | 5.20E-03 | transcription_start_site | - | 275975 | 275975 | -2309 | 28980 | AN7508 |
| 2112 | CONTIG129 | 275101 | 275600 | 1.33 | 1.08E-01 | transcription_start_site | - | 275975 | 275975 | 624   | 28980 | AN7508 |
| 2639 | CONTIG129 | 275641 | 276800 | 1.15 | 1.79E-01 | transcription_start_site | - | 275975 | 275975 | -245  | 28980 | AN7508 |
| 422  | CONTIG129 | 278940 | 279369 | 2.57 | 9.51E-04 | transcription_start_site | + | 278699 | 278699 | 455   | 28982 | AN7509 |
| 422  | CONTIG129 | 278940 | 279369 | 2.57 | 9.51E-04 | transcription_start_site | + | 278001 | 278001 | 1153  | 28981 | AN7509 |
| 686  | CONTIG129 | 276917 | 277191 | 2.21 | 4.61E-03 | transcription_start_site | + | 278001 | 278001 | -947  | 28981 | AN7509 |
| 686  | CONTIG129 | 276917 | 277191 | 2.21 | 4.61E-03 | transcription_start_site | + | 278699 | 278699 | -1645 | 28982 | AN7509 |
| 747  | CONTIG129 | 278030 | 278539 | 2.16 | 5.20E-03 | transcription_start_site | + | 278001 | 278001 | 283   | 28981 | AN7509 |
| 747  | CONTIG129 | 278030 | 278539 | 2.16 | 5.20E-03 | transcription_start_site | + | 278699 | 278699 | -414  | 28982 | AN7509 |
| 1219 | CONTIG129 | 273381 | 273655 | 1.75 | 2.62E-02 | transcription_start_site | + | 278001 | 278001 | -4483 | 28981 | AN7509 |
| 2112 | CONTIG129 | 275101 | 275600 | 1.33 | 1.08E-01 | transcription_start_site | + | 278001 | 278001 | -2650 | 28981 | AN7509 |
| 2112 | CONTIG129 | 275101 | 275600 | 1.33 | 1.08E-01 | transcription_start_site | + | 278699 | 278699 | -3348 | 28982 | AN7509 |
| 2639 | CONTIG129 | 275641 | 276800 | 1.15 | 1.79E-01 | transcription_start_site | + | 278001 | 278001 | -1780 | 28981 | AN7509 |
| 2639 | CONTIG129 | 275641 | 276800 | 1.15 | 1.79E-01 | transcription_start_site | + | 278699 | 278699 | -2478 | 28982 | AN7509 |
| 298  | CONTIG129 | 283220 | 283565 | 2.76 | 0.00E+00 | transcription_start_site | - | 282238 | 282238 | -1154 | 28983 | AN7510 |
| 298  | CONTIG129 | 283220 | 283565 | 2.76 | 0.00E+00 | transcription_start_site | - | 282170 | 282170 | -1222 | 28984 | AN7510 |
| 298  | CONTIG129 | 283220 | 283565 | 2.76 | 0.00E+00 | transcription_start_site | - | 281193 | 281193 | -2199 | 28985 | AN7510 |
| 298  | CONTIG129 | 283220 | 283565 | 2.76 | 0.00E+00 | transcription_start_site | - | 281114 | 281114 | -2278 | 28986 | AN7510 |
| 298  | CONTIG129 | 283220 | 283565 | 2.76 | 0.00E+00 | transcription_start_site | - | 280762 | 280762 | -2630 | 28987 | AN7510 |
| 298  | CONTIG129 | 283220 | 283565 | 2.76 | 0.00E+00 | transcription_start_site | - | 280454 | 280454 | -2938 | 28988 | AN7510 |
| 298  | CONTIG129 | 283220 | 283565 | 2.76 | 0.00E+00 | transcription_start_site | - | 280286 | 280286 | -3106 | 28989 | AN7510 |
| 422  | CONTIG129 | 278940 | 279369 | 2.57 | 9.51E-04 | transcription_start_site | - | 280286 | 280286 | 1131  | 28989 | AN7510 |
| 298  | CONTIG129 | 283220 | 283565 | 2.76 | 0.00E+00 | transcription_start_site | + | 284077 | 284077 | -684  | 28990 | AN7511 |
| 298  | CONTIG129 | 283220 | 283565 | 2.76 | 0.00E+00 | transcription_start_site | + | 284223 | 284223 | -830  | 28991 | AN7511 |
| 422  | CONTIG129 | 278940 | 279369 | 2.57 | 9.51E-04 | transcription_start_site | + | 284077 | 284077 | -4922 | 28990 | AN7511 |
| 422  | CONTIG129 | 278940 | 279369 | 2.57 | 9.51E-04 | transcription_start_site | + | 284223 | 284223 | -5068 | 28991 | AN7511 |
| 2113 | CONTIG129 | 292730 | 293089 | 1.33 | 1.08E-01 | transcription_start_site | + | 293516 | 293516 | -606  | 28992 | AN7513 |
| 2113 | CONTIG129 | 292730 | 293089 | 1.33 | 1.08E-01 | transcription_start_site | + | 294042 | 294042 | -1132 | 28993 | AN7513 |
| 2113 | CONTIG129 | 292730 | 293089 | 1.33 | 1.08E-01 | transcription_start_site | + | 295208 | 295208 | -2298 | 28994 | AN7513 |
| 1373 | CONTIG129 | 337809 | 338303 | 1.65 | 3.70E-02 | transcription_start_site | + | 336984 | 336984 | 1072  | 29028 | AN7524 |
| 2528 | CONTIG129 | 335479 | 336213 | 1.19 | 1.11E-01 | transcription_start_site | + | 336077 | 336077 | -231  | 29026 | AN7524 |
| 2528 | CONTIG129 | 335479 | 336213 | 1.19 | 1.11E-01 | transcription_start_site | + | 336198 | 336198 | -352  | 29027 | AN7524 |
| 2528 | CONTIG129 | 335479 | 336213 | 1.19 | 1.11E-01 | transcription_start_site | + | 336984 | 336984 | -1138 | 29028 | AN7524 |
| 1373 | CONTIG129 | 337809 | 338303 | 1.65 | 3.70E-02 | transcription_start_site | + | 340612 | 340612 | -2556 | 29033 | AN7526 |
| 1373 | CONTIG129 | 337809 | 338303 | 1.65 | 3.70E-02 | transcription_start_site | + | 340736 | 340736 | -2680 | 29034 | AN7526 |
| 1373 | CONTIG129 | 337809 | 338303 | 1.65 | 3.70E-02 | transcription_start_site | + | 340888 | 340888 | -2832 | 29035 | AN7526 |
| 2528 | CONTIG129 | 335479 | 336213 | 1.19 | 1.11E-01 | transcription_start_site | + | 340612 | 340612 | -4766 | 29033 | AN7526 |
| 2528 | CONTIG129 | 335479 | 336213 | 1.19 | 1.11E-01 | transcription_start_site | + | 340736 | 340736 | -4890 | 29034 | AN7526 |
| 2528 | CONTIG129 | 335479 | 336213 | 1.19 | 1.11E-01 | transcription_start_site | + | 340888 | 340888 | -5042 | 29035 | AN7526 |
| 1297 | CONTIG129 | 346364 | 346722 | 1.7  | 3.08E-02 | transcription_start_site | + | 347145 | 347145 | -602  | 29036 | AN7528 |
| 1297 | CONTIG129 | 346364 | 346722 | 1.7  | 3.08E-02 | transcription_start_site | + | 348000 | 348000 | -1457 | 29037 | AN7528 |
| 2222 | CONTIG129 | 347039 | 347683 | 1.29 | 1.07E-01 | transcription_start_site | + | 347145 | 347145 | 216   | 29036 | AN7528 |
| 2222 | CONTIG129 | 347039 | 347683 | 1.29 | 1.07E-01 | transcription_start_site | + | 348000 | 348000 | -639  | 29037 | AN7528 |
| 1645 | CONTIG129 | 355426 | 355775 | 1.52 | 5.88E-02 | transcription_start_site | + | 355218 | 355218 | 382   | 29039 | AN7530 |
| 274  | CONTIG129 | 370742 | 371011 | 2.8  | 2.39E-04 | transcription_start_site | - | 370215 | 370215 | -661  | 29046 | AN7533 |
| 274  | CONTIG129 | 370742 | 371011 | 2.8  | 2.39E-04 | transcription_start_site | - | 369084 | 369084 | -1792 | 29047 | AN7533 |
| 274  | CONTIG129 | 370742 | 371011 | 2.8  | 2.39E-04 | transcription_start_site | - | 368011 | 368011 | -2865 | 29048 | AN7533 |
| 274  | CONTIG129 | 370742 | 371011 | 2.8  | 2.39E-04 | transcription_start_site | + | 371433 | 371433 | -556  | 29049 | AN7534 |
| 274  | CONTIG129 | 370742 | 371011 | 2.8  | 2.39E-04 | transcription_start_site | + | 375807 | 375807 | -4930 | 29052 | AN7536 |
| 274  | CONTIG129 | 370742 | 371011 | 2.8  | 2.39E-04 | transcription_start_site | + | 375921 | 375921 | -5044 | 29053 | AN7536 |

|      |           |        |        |      |          |                          |   |        |        |       |       |        |
|------|-----------|--------|--------|------|----------|--------------------------|---|--------|--------|-------|-------|--------|
| 2114 | CONTIG129 | 379741 | 380020 | 1.33 | 1.08E-01 | transcription_start_site | - | 379749 | 379749 | -131  | 29056 | AN7537 |
| 2114 | CONTIG129 | 379741 | 380020 | 1.33 | 1.08E-01 | transcription_start_site | - | 380075 | 380075 | 194   | 29055 | AN7537 |
| 2114 | CONTIG129 | 379741 | 380020 | 1.33 | 1.08E-01 | transcription_start_site | - | 379542 | 379542 | -338  | 29057 | AN7537 |
| 2114 | CONTIG129 | 379741 | 380020 | 1.33 | 1.08E-01 | transcription_start_site | - | 380316 | 380316 | 435   | 29054 | AN7537 |
| 2114 | CONTIG129 | 379741 | 380020 | 1.33 | 1.08E-01 | transcription_start_site | - | 379402 | 379402 | -478  | 29058 | AN7537 |
| 2114 | CONTIG129 | 379741 | 380020 | 1.33 | 1.08E-01 | transcription_start_site | - | 379106 | 379106 | -774  | 29059 | AN7537 |
| 2114 | CONTIG129 | 379741 | 380020 | 1.33 | 1.08E-01 | transcription_start_site | - | 378795 | 378795 | -1085 | 29060 | AN7537 |
| 2114 | CONTIG129 | 379741 | 380020 | 1.33 | 1.08E-01 | transcription_start_site | - | 378626 | 378626 | -1254 | 29061 | AN7537 |
| 1646 | CONTIG129 | 398337 | 398618 | 1.52 | 5.88E-02 | transcription_start_site | - | 396278 | 396278 | -2199 | 29072 | AN7542 |
| 1646 | CONTIG129 | 398337 | 398618 | 1.52 | 5.88E-02 | transcription_start_site | - | 395987 | 395987 | -2490 | 29073 | AN7542 |
| 1646 | CONTIG129 | 398337 | 398618 | 1.52 | 5.88E-02 | transcription_start_site | - | 395845 | 395845 | -2632 | 29074 | AN7542 |
| 1646 | CONTIG129 | 398337 | 398618 | 1.52 | 5.88E-02 | transcription_start_site | - | 395711 | 395711 | -2766 | 29075 | AN7542 |
| 1646 | CONTIG129 | 398337 | 398618 | 1.52 | 5.88E-02 | transcription_start_site | - | 395135 | 395135 | -3342 | 29076 | AN7542 |
| 2115 | CONTIG129 | 399537 | 399801 | 1.33 | 1.08E-01 | transcription_start_site | - | 396278 | 396278 | -3391 | 29072 | AN7542 |
| 2115 | CONTIG129 | 399537 | 399801 | 1.33 | 1.08E-01 | transcription_start_site | - | 395987 | 395987 | -3682 | 29073 | AN7542 |
| 2115 | CONTIG129 | 399537 | 399801 | 1.33 | 1.08E-01 | transcription_start_site | - | 395845 | 395845 | -3824 | 29074 | AN7542 |
| 2115 | CONTIG129 | 399537 | 399801 | 1.33 | 1.08E-01 | transcription_start_site | - | 395711 | 395711 | -3958 | 29075 | AN7542 |
| 2115 | CONTIG129 | 399537 | 399801 | 1.33 | 1.08E-01 | transcription_start_site | - | 395135 | 395135 | -4534 | 29076 | AN7542 |
| 1646 | CONTIG129 | 398337 | 398618 | 1.52 | 5.88E-02 | transcription_start_site | + | 398979 | 398979 | -501  | 29077 | AN7543 |
| 2115 | CONTIG129 | 399537 | 399801 | 1.33 | 1.08E-01 | transcription_start_site | + | 398979 | 398979 | 690   | 29077 | AN7543 |
| 2545 | CONTIG129 | 406208 | 406487 | 1.19 | 1.66E-01 | transcription_start_site | - | 403425 | 403425 | -2922 | 29078 | AN7544 |
| 2545 | CONTIG129 | 406208 | 406487 | 1.19 | 1.66E-01 | transcription_start_site | - | 403075 | 403075 | -3272 | 29079 | AN7544 |
| 2545 | CONTIG129 | 406208 | 406487 | 1.19 | 1.66E-01 | transcription_start_site | - | 401403 | 401403 | -4944 | 29080 | AN7544 |
| 65   | CONTIG129 | 409278 | 409708 | 3.35 | 0.00E+00 | transcription_start_site | - | 406834 | 406834 | -2659 | 29081 | AN7545 |
| 1298 | CONTIG129 | 410563 | 411127 | 1.7  | 3.08E-02 | transcription_start_site | - | 406834 | 406834 | -4011 | 29081 | AN7545 |
| 2545 | CONTIG129 | 406208 | 406487 | 1.19 | 1.66E-01 | transcription_start_site | - | 406834 | 406834 | 486   | 29081 | AN7545 |
| 65   | CONTIG129 | 409278 | 409708 | 3.35 | 0.00E+00 | transcription_start_site | - | 409913 | 409913 | 420   | 29084 | AN7546 |
| 65   | CONTIG129 | 409278 | 409708 | 3.35 | 0.00E+00 | transcription_start_site | - | 410032 | 410032 | 539   | 29083 | AN7546 |
| 65   | CONTIG129 | 409278 | 409708 | 3.35 | 0.00E+00 | transcription_start_site | - | 410470 | 410470 | 977   | 29082 | AN7546 |
| 1298 | CONTIG129 | 410563 | 411127 | 1.7  | 3.08E-02 | transcription_start_site | - | 410470 | 410470 | -375  | 29082 | AN7546 |
| 1298 | CONTIG129 | 410563 | 411127 | 1.7  | 3.08E-02 | transcription_start_site | - | 410032 | 410032 | -813  | 29083 | AN7546 |
| 1298 | CONTIG129 | 410563 | 411127 | 1.7  | 3.08E-02 | transcription_start_site | - | 409913 | 409913 | -932  | 29084 | AN7546 |
| 1298 | CONTIG129 | 410563 | 411127 | 1.7  | 3.08E-02 | transcription_start_site | + | 416119 | 416119 | -5274 | 29085 | AN7547 |
| 2546 | CONTIG129 | 429601 | 429875 | 1.19 | 1.66E-01 | transcription_start_site | - | 425575 | 425575 | -4163 | 29089 | AN7549 |
| 538  | CONTIG129 | 432376 | 432725 | 2.39 | 0.00E+00 | transcription_start_site | - | 428361 | 428361 | -4189 | 29090 | AN7550 |
| 538  | CONTIG129 | 432376 | 432725 | 2.39 | 0.00E+00 | transcription_start_site | - | 427846 | 427846 | -4704 | 29091 | AN7550 |
| 2546 | CONTIG129 | 429601 | 429875 | 1.19 | 1.66E-01 | transcription_start_site | - | 428361 | 428361 | -1377 | 29090 | AN7550 |
| 2546 | CONTIG129 | 429601 | 429875 | 1.19 | 1.66E-01 | transcription_start_site | - | 427846 | 427846 | -1892 | 29091 | AN7550 |
| 2546 | CONTIG129 | 429601 | 429875 | 1.19 | 1.66E-01 | transcription_start_site | - | 426531 | 426531 | -3207 | 29092 | AN7550 |
| 2546 | CONTIG129 | 429601 | 429875 | 1.19 | 1.66E-01 | transcription_start_site | + | 429155 | 429155 | 583   | 29093 | AN7551 |
| 538  | CONTIG129 | 432376 | 432725 | 2.39 | 0.00E+00 | transcription_start_site | - | 430817 | 430817 | -1733 | 29095 | AN7552 |
| 538  | CONTIG129 | 432376 | 432725 | 2.39 | 0.00E+00 | transcription_start_site | - | 430485 | 430485 | -2065 | 29096 | AN7552 |
| 2116 | CONTIG129 | 438457 | 438731 | 1.33 | 1.08E-01 | transcription_start_site | - | 434679 | 434679 | -3915 | 29094 | AN7552 |
| 2546 | CONTIG129 | 429601 | 429875 | 1.19 | 1.66E-01 | transcription_start_site | - | 430485 | 430485 | 747   | 29096 | AN7552 |
| 2546 | CONTIG129 | 429601 | 429875 | 1.19 | 1.66E-01 | transcription_start_site | - | 430817 | 430817 | 1079  | 29095 | AN7552 |
| 17   | CONTIG129 | 439821 | 440395 | 3.63 | 0.00E+00 | transcription_start_site | - | 437172 | 437172 | -2936 | 29097 | AN7553 |
| 17   | CONTIG129 | 439821 | 440395 | 3.63 | 0.00E+00 | transcription_start_site | - | 436707 | 436707 | -3401 | 29098 | AN7553 |
| 17   | CONTIG129 | 439821 | 440395 | 3.63 | 0.00E+00 | transcription_start_site | - | 436409 | 436409 | -3699 | 29099 | AN7553 |
| 828  | CONTIG129 | 440866 | 441425 | 2.07 | 7.85E-03 | transcription_start_site | - | 437172 | 437172 | -3973 | 29097 | AN7553 |
| 828  | CONTIG129 | 440866 | 441425 | 2.07 | 7.85E-03 | transcription_start_site | - | 436707 | 436707 | -4438 | 29098 | AN7553 |
| 828  | CONTIG129 | 440866 | 441425 | 2.07 | 7.85E-03 | transcription_start_site | - | 436409 | 436409 | -4736 | 29099 | AN7553 |
| 2116 | CONTIG129 | 438457 | 438731 | 1.33 | 1.08E-01 | transcription_start_site | - | 437172 | 437172 | -1422 | 29097 | AN7553 |
| 2116 | CONTIG129 | 438457 | 438731 | 1.33 | 1.08E-01 | transcription_start_site | - | 436707 | 436707 | -1887 | 29098 | AN7553 |
| 2116 | CONTIG129 | 438457 | 438731 | 1.33 | 1.08E-01 | transcription_start_site | - | 436409 | 436409 | -2185 | 29099 | AN7553 |
| 1878 | CONTIG129 | 452416 | 452695 | 1.42 | 8.01E-02 | transcription_start_site | - | 448823 | 448823 | -3732 | 29100 | AN7554 |
| 1878 | CONTIG129 | 452416 | 452695 | 1.42 | 8.01E-02 | transcription_start_site | - | 448612 | 448612 | -3943 | 29101 | AN7554 |
| 1982 | CONTIG129 | 449346 | 449610 | 1.38 | 9.24E-02 | transcription_start_site | - | 448823 | 448823 | -655  | 29100 | AN7554 |



|      |           |        |        |      |          |                          |   |        |        |       |       |        |
|------|-----------|--------|--------|------|----------|--------------------------|---|--------|--------|-------|-------|--------|
| 1982 | CONTIG129 | 449346 | 449610 | 1.38 | 9.24E-02 | transcription_start_site | - | 448612 | 448612 | -866  | 29101 | AN7554 |
| 1982 | CONTIG129 | 449346 | 449610 | 1.38 | 9.24E-02 | transcription_start_site | + | 449299 | 449299 | 179   | 29102 | AN7555 |
| 1982 | CONTIG129 | 449346 | 449610 | 1.38 | 9.24E-02 | transcription_start_site | + | 450149 | 450149 | -671  | 29103 | AN7555 |
| 1878 | CONTIG129 | 452416 | 452695 | 1.42 | 8.01E-02 | transcription_start_site | - | 451523 | 451523 | -1032 | 29104 | AN7556 |
| 1878 | CONTIG129 | 452416 | 452695 | 1.42 | 8.01E-02 | transcription_start_site | - | 450949 | 450949 | -1606 | 29105 | AN7556 |
| 1878 | CONTIG129 | 452416 | 452695 | 1.42 | 8.01E-02 | transcription_start_site | - | 452054 | 452054 | -501  | 29109 | AN7557 |
| 1878 | CONTIG129 | 452416 | 452695 | 1.42 | 8.01E-02 | transcription_start_site | + | 457293 | 457293 | -4737 | 29110 | AN7558 |
| 2649 | CONTIG129 | 461026 | 461300 | 1.15 | 1.93E-01 | transcription_start_site | - | 459513 | 459513 | -1650 | 29111 | AN7559 |
| 2649 | CONTIG129 | 461026 | 461300 | 1.15 | 1.93E-01 | transcription_start_site | + | 460998 | 460998 | 165   | 29112 | AN7560 |
| 2649 | CONTIG129 | 461026 | 461300 | 1.15 | 1.93E-01 | transcription_start_site | + | 462320 | 462320 | -1157 | 29113 | AN7560 |
| 1299 | CONTIG129 | 470421 | 470708 | 1.7  | 3.08E-02 | transcription_start_site | - | 469538 | 469538 | -1026 | 29119 | AN7563 |
| 1299 | CONTIG129 | 470421 | 470708 | 1.7  | 3.08E-02 | transcription_start_site | - | 468599 | 468599 | -1965 | 29120 | AN7563 |
| 1299 | CONTIG129 | 470421 | 470708 | 1.7  | 3.08E-02 | transcription_start_site | - | 468152 | 468152 | -2412 | 29121 | AN7563 |
| 1299 | CONTIG129 | 470421 | 470708 | 1.7  | 3.08E-02 | transcription_start_site | - | 470824 | 470824 | 259   | 29124 | AN7564 |
| 1299 | CONTIG129 | 470421 | 470708 | 1.7  | 3.08E-02 | transcription_start_site | + | 472619 | 472619 | -2054 | 29125 | AN7565 |
| 1299 | CONTIG129 | 470421 | 470708 | 1.7  | 3.08E-02 | transcription_start_site | + | 472975 | 472975 | -2410 | 29126 | AN7565 |
| 881  | CONTIG129 | 477321 | 477595 | 2.02 | 8.81E-03 | transcription_start_site | - | 476769 | 476769 | -689  | 29127 | AN7566 |
| 881  | CONTIG129 | 477321 | 477595 | 2.02 | 8.81E-03 | transcription_start_site | + | 477505 | 477505 | -47   | 29128 | AN7567 |
| 881  | CONTIG129 | 477321 | 477595 | 2.02 | 8.81E-03 | transcription_start_site | + | 478344 | 478344 | -886  | 29129 | AN7567 |
| 748  | CONTIG129 | 485256 | 485532 | 2.16 | 5.20E-03 | transcription_start_site | - | 480627 | 480627 | -4767 | 29130 | AN7568 |
| 881  | CONTIG129 | 477321 | 477595 | 2.02 | 8.81E-03 | transcription_start_site | + | 480973 | 480973 | -3515 | 29132 | AN7569 |
| 881  | CONTIG129 | 477321 | 477595 | 2.02 | 8.81E-03 | transcription_start_site | + | 481066 | 481066 | -3608 | 29133 | AN7569 |
| 881  | CONTIG129 | 477321 | 477595 | 2.02 | 8.81E-03 | transcription_start_site | + | 481188 | 481188 | -3730 | 29134 | AN7569 |
| 748  | CONTIG129 | 485256 | 485532 | 2.16 | 5.20E-03 | transcription_start_site | - | 484250 | 484250 | -1144 | 29135 | AN7570 |
| 748  | CONTIG129 | 485256 | 485532 | 2.16 | 5.20E-03 | transcription_start_site | - | 484060 | 484060 | -1334 | 29136 | AN7570 |
| 748  | CONTIG129 | 485256 | 485532 | 2.16 | 5.20E-03 | transcription_start_site | - | 483931 | 483931 | -1463 | 29137 | AN7570 |
| 748  | CONTIG129 | 485256 | 485532 | 2.16 | 5.20E-03 | transcription_start_site | - | 483725 | 483725 | -1669 | 29138 | AN7570 |
| 748  | CONTIG129 | 485256 | 485532 | 2.16 | 5.20E-03 | transcription_start_site | - | 483576 | 483576 | -1818 | 29139 | AN7570 |
| 748  | CONTIG129 | 485256 | 485532 | 2.16 | 5.20E-03 | transcription_start_site | - | 483441 | 483441 | -1953 | 29140 | AN7570 |
| 748  | CONTIG129 | 485256 | 485532 | 2.16 | 5.20E-03 | transcription_start_site | - | 482862 | 482862 | -2532 | 29141 | AN7570 |
| 748  | CONTIG129 | 485256 | 485532 | 2.16 | 5.20E-03 | transcription_start_site | + | 486084 | 486084 | -690  | 29142 | AN7571 |
| 748  | CONTIG129 | 485256 | 485532 | 2.16 | 5.20E-03 | transcription_start_site | + | 486794 | 486794 | -1400 | 29143 | AN7571 |
| 353  | CONTIG129 | 498093 | 498668 | 2.67 | 0.00E+00 | transcription_start_site | - | 496640 | 496640 | -1740 | 29144 | AN7572 |
| 353  | CONTIG129 | 498093 | 498668 | 2.67 | 0.00E+00 | transcription_start_site | - | 496023 | 496023 | -2357 | 29145 | AN7572 |
| 2384 | CONTIG129 | 520893 | 521302 | 1.24 | 1.44E-01 | transcription_start_site | - | 519377 | 519377 | -1720 | 29165 | AN7578 |
| 2384 | CONTIG129 | 520893 | 521302 | 1.24 | 1.44E-01 | transcription_start_site | - | 519177 | 519177 | -1920 | 29166 | AN7578 |
| 2384 | CONTIG129 | 520893 | 521302 | 1.24 | 1.44E-01 | transcription_start_site | - | 518831 | 518831 | -2266 | 29167 | AN7578 |
| 2384 | CONTIG129 | 520893 | 521302 | 1.24 | 1.44E-01 | transcription_start_site | + | 520186 | 520186 | 911   | 29169 | AN7579 |
| 2384 | CONTIG129 | 520893 | 521302 | 1.24 | 1.44E-01 | transcription_start_site | + | 519963 | 519963 | 1134  | 29168 | AN7579 |
| 1879 | CONTIG129 | 525846 | 526120 | 1.42 | 8.01E-02 | transcription_start_site | - | 524503 | 524503 | -1480 | 29170 | AN7580 |
| 2232 | CONTIG129 | 539046 | 539307 | 1.29 | 1.25E-01 | transcription_start_site | + | 539067 | 539067 | 109   | 29173 | AN7582 |
| 2232 | CONTIG129 | 539046 | 539307 | 1.29 | 1.25E-01 | transcription_start_site | + | 538901 | 538901 | 275   | 29172 | AN7582 |
| 2232 | CONTIG129 | 539046 | 539307 | 1.29 | 1.25E-01 | transcription_start_site | + | 539500 | 539500 | -323  | 29174 | AN7582 |
| 2232 | CONTIG129 | 539046 | 539307 | 1.29 | 1.25E-01 | transcription_start_site | + | 538718 | 538718 | 458   | 29171 | AN7582 |
| 2232 | CONTIG129 | 539046 | 539307 | 1.29 | 1.25E-01 | transcription_start_site | + | 539669 | 539669 | -492  | 29175 | AN7582 |
| 2232 | CONTIG129 | 539046 | 539307 | 1.29 | 1.25E-01 | transcription_start_site | + | 539743 | 539743 | -566  | 29176 | AN7582 |
| 275  | CONTIG129 | 544202 | 544491 | 2.8  | 2.39E-04 | transcription_start_site | - | 542713 | 542713 | -1633 | 29177 | AN7583 |
| 275  | CONTIG129 | 544202 | 544491 | 2.8  | 2.39E-04 | transcription_start_site | - | 542273 | 542273 | -2073 | 29178 | AN7583 |
| 2117 | CONTIG129 | 549912 | 550266 | 1.33 | 1.08E-01 | transcription_start_site | - | 548914 | 548914 | -1175 | 29179 | AN7584 |
| 2117 | CONTIG129 | 549912 | 550266 | 1.33 | 1.08E-01 | transcription_start_site | - | 548855 | 548855 | -1234 | 29180 | AN7584 |
| 2117 | CONTIG129 | 549912 | 550266 | 1.33 | 1.08E-01 | transcription_start_site | - | 548269 | 548269 | -1820 | 29181 | AN7584 |
| 2117 | CONTIG129 | 549912 | 550266 | 1.33 | 1.08E-01 | transcription_start_site | + | 550333 | 550333 | -244  | 29182 | AN7585 |
| 2117 | CONTIG129 | 549912 | 550266 | 1.33 | 1.08E-01 | transcription_start_site | + | 550577 | 550577 | -488  | 29183 | AN7585 |
| 2117 | CONTIG129 | 549912 | 550266 | 1.33 | 1.08E-01 | transcription_start_site | + | 550940 | 550940 | -851  | 29184 | AN7585 |
| 2117 | CONTIG129 | 549912 | 550266 | 1.33 | 1.08E-01 | transcription_start_site | + | 551118 | 551118 | -1029 | 29185 | AN7585 |
| 2117 | CONTIG129 | 549912 | 550266 | 1.33 | 1.08E-01 | transcription_start_site | + | 552871 | 552871 | -2782 | 29186 | AN7586 |
| 2117 | CONTIG129 | 549912 | 550266 | 1.33 | 1.08E-01 | transcription_start_site | + | 553040 | 553040 | -2951 | 29187 | AN7586 |

|      |           |        |        |      |          |                          |   |        |        |       |       |        |
|------|-----------|--------|--------|------|----------|--------------------------|---|--------|--------|-------|-------|--------|
| 2117 | CONTIG129 | 549912 | 550266 | 1.33 | 1.08E-01 | transcription_start_site | + | 553560 | 553560 | -3471 | 29188 | AN7586 |
| 545  | CONTIG129 | 556053 | 556402 | 2.39 | 1.80E-03 | transcription_start_site | + | 556587 | 556587 | -359  | 29189 | AN7587 |
| 545  | CONTIG129 | 556053 | 556402 | 2.39 | 1.80E-03 | transcription_start_site | + | 556888 | 556888 | -660  | 29190 | AN7587 |
| 1300 | CONTIG129 | 556888 | 557237 | 1.7  | 3.08E-02 | transcription_start_site | + | 556888 | 556888 | 174   | 29190 | AN7587 |
| 1300 | CONTIG129 | 556888 | 557237 | 1.7  | 3.08E-02 | transcription_start_site | + | 556587 | 556587 | 475   | 29189 | AN7587 |
| 1300 | CONTIG129 | 556888 | 557237 | 1.7  | 3.08E-02 | transcription_start_site | - | 558215 | 558215 | 1152  | 29193 | AN7588 |
| 1091 | CONTIG129 | 573604 | 573893 | 1.84 | 1.84E-02 | transcription_start_site | - | 571190 | 571190 | -2558 | 29194 | AN7590 |
| 1287 | CONTIG129 | 571214 | 572153 | 1.7  | 1.23E-02 | transcription_start_site | - | 571190 | 571190 | -493  | 29194 | AN7590 |
| 1091 | CONTIG129 | 573604 | 573893 | 1.84 | 1.84E-02 | transcription_start_site | - | 573668 | 573668 | -80   | 29196 | AN7591 |
| 1091 | CONTIG129 | 573604 | 573893 | 1.84 | 1.84E-02 | transcription_start_site | - | 573877 | 573877 | 128   | 29195 | AN7591 |
| 1091 | CONTIG129 | 573604 | 573893 | 1.84 | 1.84E-02 | transcription_start_site | - | 573366 | 573366 | -382  | 29197 | AN7591 |
| 1091 | CONTIG129 | 573604 | 573893 | 1.84 | 1.84E-02 | transcription_start_site | - | 574582 | 574582 | 833   | 29207 | AN7592 |
| 1091 | CONTIG129 | 573604 | 573893 | 1.84 | 1.84E-02 | transcription_start_site | - | 574753 | 574753 | 1004  | 29206 | AN7592 |
| 2650 | CONTIG129 | 598594 | 599163 | 1.15 | 1.93E-01 | transcription_start_site | + | 600885 | 600885 | -2006 | 29225 | AN7599 |
| 2650 | CONTIG129 | 598594 | 599163 | 1.15 | 1.93E-01 | transcription_start_site | + | 601066 | 601066 | -2187 | 29226 | AN7599 |
| 2650 | CONTIG129 | 598594 | 599163 | 1.15 | 1.93E-01 | transcription_start_site | + | 601182 | 601182 | -2303 | 29227 | AN7599 |
| 276  | CONTIG129 | 612836 | 613105 | 2.8  | 2.39E-04 | transcription_start_site | - | 608669 | 608669 | -4301 | 29228 | AN7600 |
| 276  | CONTIG129 | 612836 | 613105 | 2.8  | 2.39E-04 | transcription_start_site | - | 608538 | 608538 | -4432 | 29229 | AN7600 |
| 276  | CONTIG129 | 612836 | 613105 | 2.8  | 2.39E-04 | transcription_start_site | - | 608348 | 608348 | -4622 | 29230 | AN7600 |
| 276  | CONTIG129 | 612836 | 613105 | 2.8  | 2.39E-04 | transcription_start_site | - | 610761 | 610761 | -2209 | 29232 | AN7601 |
| 276  | CONTIG129 | 612836 | 613105 | 2.8  | 2.39E-04 | transcription_start_site | - | 610630 | 610630 | -2340 | 29233 | AN7601 |
| 276  | CONTIG129 | 612836 | 613105 | 2.8  | 2.39E-04 | transcription_start_site | - | 612691 | 612691 | -279  | 29234 | AN7602 |
| 276  | CONTIG129 | 612836 | 613105 | 2.8  | 2.39E-04 | transcription_start_site | - | 612584 | 612584 | -386  | 29235 | AN7602 |
| 276  | CONTIG129 | 612836 | 613105 | 2.8  | 2.39E-04 | transcription_start_site | - | 612497 | 612497 | -473  | 29236 | AN7602 |
| 276  | CONTIG129 | 612836 | 613105 | 2.8  | 2.39E-04 | transcription_start_site | - | 612311 | 612311 | -659  | 29237 | AN7602 |
| 276  | CONTIG129 | 612836 | 613105 | 2.8  | 2.39E-04 | transcription_start_site | - | 611755 | 611755 | -1215 | 29238 | AN7602 |
| 276  | CONTIG129 | 612836 | 613105 | 2.8  | 2.39E-04 | transcription_start_site | + | 613179 | 613179 | -208  | 29239 | AN7603 |
| 276  | CONTIG129 | 612836 | 613105 | 2.8  | 2.39E-04 | transcription_start_site | + | 613287 | 613287 | -316  | 29240 | AN7603 |
| 276  | CONTIG129 | 612836 | 613105 | 2.8  | 2.39E-04 | transcription_start_site | + | 613377 | 613377 | -406  | 29241 | AN7603 |
| 276  | CONTIG129 | 612836 | 613105 | 2.8  | 2.39E-04 | transcription_start_site | + | 613523 | 613523 | -552  | 29242 | AN7603 |
| 276  | CONTIG129 | 612836 | 613105 | 2.8  | 2.39E-04 | transcription_start_site | + | 613885 | 613885 | -914  | 29243 | AN7603 |
| 822  | CONTIG129 | 621677 | 622041 | 2.07 | 3.31E-03 | transcription_start_site | - | 618538 | 618538 | -3321 | 29244 | AN7604 |
| 822  | CONTIG129 | 621677 | 622041 | 2.07 | 3.31E-03 | transcription_start_site | - | 617482 | 617482 | -4377 | 29245 | AN7604 |
| 822  | CONTIG129 | 621677 | 622041 | 2.07 | 3.31E-03 | transcription_start_site | - | 620409 | 620409 | -1450 | 29248 | AN7605 |
| 822  | CONTIG129 | 621677 | 622041 | 2.07 | 3.31E-03 | transcription_start_site | - | 620325 | 620325 | -1534 | 29249 | AN7605 |
| 822  | CONTIG129 | 621677 | 622041 | 2.07 | 3.31E-03 | transcription_start_site | - | 619716 | 619716 | -2143 | 29250 | AN7605 |
| 1278 | CONTIG130 | 1296   | 1648   | 1.71 | 3.70E-02 | transcription_start_site | + | 1759   | 1759   | -287  | 29251 | AN7607 |
| 1278 | CONTIG130 | 1296   | 1648   | 1.71 | 3.70E-02 | transcription_start_site | + | 5158   | 5158   | -3686 | 29252 | AN7608 |
| 1278 | CONTIG130 | 1296   | 1648   | 1.71 | 3.70E-02 | transcription_start_site | + | 5790   | 5790   | -4318 | 29253 | AN7608 |
| 1278 | CONTIG130 | 1296   | 1648   | 1.71 | 3.70E-02 | transcription_start_site | + | 6092   | 6092   | -4620 | 29254 | AN7608 |
| 2549 | CONTIG130 | 34353  | 35602  | 1.19 | 1.93E-01 | transcription_start_site | - | 29400  | 29400  | -5577 | 29276 | AN7616 |
| 1205 | CONTIG130 | 37438  | 37783  | 1.76 | 3.08E-02 | transcription_start_site | - | 32961  | 32961  | -4649 | 29283 | AN7618 |
| 1205 | CONTIG130 | 37438  | 37783  | 1.76 | 3.08E-02 | transcription_start_site | - | 32878  | 32878  | -4732 | 29284 | AN7618 |
| 2549 | CONTIG130 | 34353  | 35602  | 1.19 | 1.93E-01 | transcription_start_site | - | 32961  | 32961  | -2016 | 29283 | AN7618 |
| 2549 | CONTIG130 | 34353  | 35602  | 1.19 | 1.93E-01 | transcription_start_site | - | 32878  | 32878  | -2099 | 29284 | AN7618 |
| 1205 | CONTIG130 | 37438  | 37783  | 1.76 | 3.08E-02 | transcription_start_site | - | 34761  | 34761  | -2849 | 29285 | AN7619 |
| 2549 | CONTIG130 | 34353  | 35602  | 1.19 | 1.93E-01 | transcription_start_site | - | 34761  | 34761  | -216  | 29285 | AN7619 |
| 2265 | CONTIG130 | 42312  | 42892  | 1.28 | 1.28E-01 | transcription_start_site | - | 42484  | 42484  | -118  | 29286 | AN7621 |
| 2265 | CONTIG130 | 42312  | 42892  | 1.28 | 1.28E-01 | transcription_start_site | + | 44085  | 44085  | -1483 | 29287 | AN7622 |
| 2110 | CONTIG130 | 47927  | 48576  | 1.33 | 1.07E-01 | transcription_start_site | + | 49040  | 49040  | -788  | 29288 | AN7624 |
| 2110 | CONTIG130 | 47927  | 48576  | 1.33 | 1.07E-01 | transcription_start_site | + | 49206  | 49206  | -954  | 29289 | AN7624 |
| 2110 | CONTIG130 | 47927  | 48576  | 1.33 | 1.07E-01 | transcription_start_site | + | 49371  | 49371  | -1119 | 29290 | AN7624 |
| 2110 | CONTIG130 | 47927  | 48576  | 1.33 | 1.07E-01 | transcription_start_site | + | 49704  | 49704  | -1452 | 29291 | AN7624 |
| 2110 | CONTIG130 | 47927  | 48576  | 1.33 | 1.07E-01 | transcription_start_site | + | 50417  | 50417  | -2165 | 29292 | AN7624 |
| 705  | CONTIG130 | 56854  | 57203  | 2.19 | 2.49E-03 | transcription_start_site | - | 55588  | 55588  | -1440 | 29293 | AN7625 |
| 705  | CONTIG130 | 56854  | 57203  | 2.19 | 2.49E-03 | transcription_start_site | - | 54834  | 54834  | -2194 | 29294 | AN7625 |
| 902  | CONTIG130 | 55742  | 56318  | 2    | 1.30E-02 | transcription_start_site | - | 55588  | 55588  | -442  | 29293 | AN7625 |

|      |           |        |        |      |          |                          |   |        |        |       |       |        |
|------|-----------|--------|--------|------|----------|--------------------------|---|--------|--------|-------|-------|--------|
| 902  | CONTIG130 | 55742  | 56318  | 2    | 1.30E-02 | transcription_start_site | - | 54834  | 54834  | -1196 | 29294 | AN7625 |
| 705  | CONTIG130 | 56854  | 57203  | 2.19 | 2.49E-03 | transcription_start_site | + | 59016  | 59016  | -1987 | 29295 | AN7626 |
| 705  | CONTIG130 | 56854  | 57203  | 2.19 | 2.49E-03 | transcription_start_site | + | 59175  | 59175  | -2146 | 29296 | AN7626 |
| 705  | CONTIG130 | 56854  | 57203  | 2.19 | 2.49E-03 | transcription_start_site | + | 59366  | 59366  | -2337 | 29297 | AN7626 |
| 902  | CONTIG130 | 55742  | 56318  | 2    | 1.30E-02 | transcription_start_site | + | 59016  | 59016  | -2986 | 29295 | AN7626 |
| 902  | CONTIG130 | 55742  | 56318  | 2    | 1.30E-02 | transcription_start_site | + | 59175  | 59175  | -3145 | 29296 | AN7626 |
| 902  | CONTIG130 | 55742  | 56318  | 2    | 1.30E-02 | transcription_start_site | + | 59366  | 59366  | -3336 | 29297 | AN7626 |
| 1077 | CONTIG130 | 73877  | 74151  | 1.85 | 2.12E-02 | transcription_start_site | - | 71314  | 71314  | -2700 | 29303 | AN7630 |
| 1077 | CONTIG130 | 73877  | 74151  | 1.85 | 2.12E-02 | transcription_start_site | - | 73613  | 73613  | -401  | 29304 | AN7631 |
| 1077 | CONTIG130 | 73877  | 74151  | 1.85 | 2.12E-02 | transcription_start_site | - | 73282  | 73282  | -732  | 29305 | AN7631 |
| 1077 | CONTIG130 | 73877  | 74151  | 1.85 | 2.12E-02 | transcription_start_site | - | 72807  | 72807  | -1207 | 29306 | AN7631 |
| 1077 | CONTIG130 | 73877  | 74151  | 1.85 | 2.12E-02 | transcription_start_site | - | 72535  | 72535  | -1479 | 29307 | AN7631 |
| 1077 | CONTIG130 | 73877  | 74151  | 1.85 | 2.12E-02 | transcription_start_site | - | 72318  | 72318  | -1696 | 29308 | AN7631 |
| 1077 | CONTIG130 | 73877  | 74151  | 1.85 | 2.12E-02 | transcription_start_site | - | 71940  | 71940  | -2074 | 29309 | AN7631 |
| 1983 | CONTIG130 | 77707  | 78516  | 1.38 | 1.08E-01 | transcription_start_site | - | 73613  | 73613  | -4498 | 29304 | AN7631 |
| 1983 | CONTIG130 | 77707  | 78516  | 1.38 | 1.08E-01 | transcription_start_site | - | 73282  | 73282  | -4829 | 29305 | AN7631 |
| 1983 | CONTIG130 | 77707  | 78516  | 1.38 | 1.08E-01 | transcription_start_site | - | 72807  | 72807  | -5304 | 29306 | AN7631 |
| 1983 | CONTIG130 | 77707  | 78516  | 1.38 | 1.08E-01 | transcription_start_site | - | 78133  | 78133  | 21    | 29314 | AN7632 |
| 1983 | CONTIG130 | 77707  | 78516  | 1.38 | 1.08E-01 | transcription_start_site | - | 78316  | 78316  | 204   | 29313 | AN7632 |
| 1983 | CONTIG130 | 77707  | 78516  | 1.38 | 1.08E-01 | transcription_start_site | - | 78480  | 78480  | 368   | 29312 | AN7632 |
| 1983 | CONTIG130 | 77707  | 78516  | 1.38 | 1.08E-01 | transcription_start_site | - | 78565  | 78565  | 453   | 29311 | AN7632 |
| 1983 | CONTIG130 | 77707  | 78516  | 1.38 | 1.08E-01 | transcription_start_site | - | 78636  | 78636  | 524   | 29310 | AN7632 |
| 1983 | CONTIG130 | 77707  | 78516  | 1.38 | 1.08E-01 | transcription_start_site | - | 77436  | 77436  | -675  | 29315 | AN7632 |
| 2267 | CONTIG130 | 78843  | 79262  | 1.28 | 1.44E-01 | transcription_start_site | - | 78636  | 78636  | -416  | 29310 | AN7632 |
| 2267 | CONTIG130 | 78843  | 79262  | 1.28 | 1.44E-01 | transcription_start_site | - | 78565  | 78565  | -487  | 29311 | AN7632 |
| 2267 | CONTIG130 | 78843  | 79262  | 1.28 | 1.44E-01 | transcription_start_site | - | 78480  | 78480  | -572  | 29312 | AN7632 |
| 2267 | CONTIG130 | 78843  | 79262  | 1.28 | 1.44E-01 | transcription_start_site | - | 78316  | 78316  | -736  | 29313 | AN7632 |
| 2267 | CONTIG130 | 78843  | 79262  | 1.28 | 1.44E-01 | transcription_start_site | - | 78133  | 78133  | -919  | 29314 | AN7632 |
| 2267 | CONTIG130 | 78843  | 79262  | 1.28 | 1.44E-01 | transcription_start_site | - | 77436  | 77436  | -1616 | 29315 | AN7632 |
| 1983 | CONTIG130 | 77707  | 78516  | 1.38 | 1.08E-01 | transcription_start_site | - | 79468  | 79468  | 1356  | 29317 | AN7633 |
| 2267 | CONTIG130 | 78843  | 79262  | 1.28 | 1.44E-01 | transcription_start_site | - | 79468  | 79468  | 415   | 29317 | AN7633 |
| 178  | CONTIG130 | 105453 | 105877 | 2.99 | 0.00E+00 | transcription_start_site | - | 105244 | 105244 | -421  | 29338 | AN7640 |
| 178  | CONTIG130 | 105453 | 105877 | 2.99 | 0.00E+00 | transcription_start_site | - | 104351 | 104351 | -1314 | 29339 | AN7640 |
| 2111 | CONTIG130 | 106813 | 107602 | 1.33 | 1.07E-01 | transcription_start_site | - | 105244 | 105244 | -1963 | 29338 | AN7640 |
| 2111 | CONTIG130 | 106813 | 107602 | 1.33 | 1.07E-01 | transcription_start_site | - | 104351 | 104351 | -2856 | 29339 | AN7640 |
| 178  | CONTIG130 | 105453 | 105877 | 2.99 | 0.00E+00 | transcription_start_site | - | 106800 | 106800 | 1135  | 29343 | AN7641 |
| 2111 | CONTIG130 | 106813 | 107602 | 1.33 | 1.07E-01 | transcription_start_site | - | 107279 | 107279 | 71    | 29342 | AN7641 |
| 2111 | CONTIG130 | 106813 | 107602 | 1.33 | 1.07E-01 | transcription_start_site | - | 106800 | 106800 | -407  | 29343 | AN7641 |
| 2111 | CONTIG130 | 106813 | 107602 | 1.33 | 1.07E-01 | transcription_start_site | - | 108580 | 108580 | 1372  | 29341 | AN7641 |
| 279  | CONTIG130 | 125035 | 125319 | 2.8  | 6.10E-04 | transcription_start_site | + | 128721 | 128721 | -3544 | 29363 | AN7648 |
| 279  | CONTIG130 | 125035 | 125319 | 2.8  | 6.10E-04 | transcription_start_site | + | 128972 | 128972 | -3795 | 29364 | AN7648 |
| 279  | CONTIG130 | 125035 | 125319 | 2.8  | 6.10E-04 | transcription_start_site | + | 129100 | 129100 | -3923 | 29365 | AN7648 |
| 1415 | CONTIG130 | 132768 | 134007 | 1.62 | 5.26E-03 | transcription_start_site | - | 132511 | 132511 | -876  | 29367 | AN7649 |
| 1415 | CONTIG130 | 132768 | 134007 | 1.62 | 5.26E-03 | transcription_start_site | - | 132408 | 132408 | -979  | 29368 | AN7649 |
| 1415 | CONTIG130 | 132768 | 134007 | 1.62 | 5.26E-03 | transcription_start_site | - | 132237 | 132237 | -1150 | 29369 | AN7649 |
| 1415 | CONTIG130 | 132768 | 134007 | 1.62 | 5.26E-03 | transcription_start_site | + | 134383 | 134383 | -995  | 29370 | AN7650 |
| 1415 | CONTIG130 | 132768 | 134007 | 1.62 | 5.26E-03 | transcription_start_site | + | 134746 | 134746 | -1358 | 29371 | AN7650 |
| 1415 | CONTIG130 | 132768 | 134007 | 1.62 | 5.26E-03 | transcription_start_site | + | 134961 | 134961 | -1573 | 29372 | AN7650 |
| 1415 | CONTIG130 | 132768 | 134007 | 1.62 | 5.26E-03 | transcription_start_site | + | 137309 | 137309 | -3921 | 29373 | AN7650 |
| 1415 | CONTIG130 | 132768 | 134007 | 1.62 | 5.26E-03 | transcription_start_site | + | 137551 | 137551 | -4163 | 29374 | AN7650 |
| 1415 | CONTIG130 | 132768 | 134007 | 1.62 | 5.26E-03 | transcription_start_site | + | 137736 | 137736 | -4348 | 29375 | AN7650 |
| 1415 | CONTIG130 | 132768 | 134007 | 1.62 | 5.26E-03 | transcription_start_site | + | 138338 | 138338 | -4950 | 29376 | AN7650 |
| 1415 | CONTIG130 | 132768 | 134007 | 1.62 | 5.26E-03 | transcription_start_site | + | 138706 | 138706 | -5318 | 29377 | AN7650 |
| 2550 | CONTIG130 | 149853 | 150202 | 1.19 | 1.93E-01 | transcription_start_site | - | 145813 | 145813 | -4214 | 29380 | AN7652 |
| 2550 | CONTIG130 | 149853 | 150202 | 1.19 | 1.93E-01 | transcription_start_site | - | 145126 | 145126 | -4901 | 29381 | AN7652 |
| 2550 | CONTIG130 | 149853 | 150202 | 1.19 | 1.93E-01 | transcription_start_site | - | 145032 | 145032 | -4995 | 29382 | AN7652 |
| 863  | CONTIG130 | 153226 | 153505 | 2.04 | 1.11E-02 | transcription_start_site | - | 152366 | 152366 | -999  | 29383 | AN7654 |

|      |           |        |        |      |          |                          |   |        |        |       |       |        |
|------|-----------|--------|--------|------|----------|--------------------------|---|--------|--------|-------|-------|--------|
| 863  | CONTIG130 | 153226 | 153505 | 2.04 | 1.11E-02 | transcription_start_site | + | 157625 | 157625 | -4259 | 29384 | AN7656 |
| 1012 | CONTIG130 | 176859 | 177214 | 1.9  | 1.84E-02 | transcription_start_site | + | 177848 | 177848 | -811  | 29393 | AN7661 |
| 221  | CONTIG130 | 181292 | 181566 | 2.9  | 2.39E-04 | transcription_start_site | + | 181902 | 181902 | -473  | 29394 | AN7662 |
| 221  | CONTIG130 | 181292 | 181566 | 2.9  | 2.39E-04 | transcription_start_site | + | 182572 | 182572 | -1143 | 29395 | AN7662 |
| 221  | CONTIG130 | 181292 | 181566 | 2.9  | 2.39E-04 | transcription_start_site | + | 182685 | 182685 | -1256 | 29396 | AN7662 |
| 221  | CONTIG130 | 181292 | 181566 | 2.9  | 2.39E-04 | transcription_start_site | + | 182915 | 182915 | -1486 | 29397 | AN7662 |
| 221  | CONTIG130 | 181292 | 181566 | 2.9  | 2.39E-04 | transcription_start_site | + | 183357 | 183357 | -1928 | 29398 | AN7662 |
| 221  | CONTIG130 | 181292 | 181566 | 2.9  | 2.39E-04 | transcription_start_site | + | 183565 | 183565 | -2136 | 29399 | AN7662 |
| 1012 | CONTIG130 | 176859 | 177214 | 1.9  | 1.84E-02 | transcription_start_site | + | 181902 | 181902 | -4865 | 29394 | AN7662 |
| 195  | CONTIG130 | 191257 | 191526 | 2.95 | 2.67E-04 | transcription_start_site | + | 192406 | 192406 | -1014 | 29402 | AN7665 |
| 195  | CONTIG130 | 191257 | 191526 | 2.95 | 2.67E-04 | transcription_start_site | + | 192796 | 192796 | -1404 | 29403 | AN7665 |
| 195  | CONTIG130 | 191257 | 191526 | 2.95 | 2.67E-04 | transcription_start_site | + | 194213 | 194213 | -2821 | 29404 | AN7666 |
| 195  | CONTIG130 | 191257 | 191526 | 2.95 | 2.67E-04 | transcription_start_site | + | 195677 | 195677 | -4285 | 29405 | AN7666 |
| 2378 | CONTIG130 | 198463 | 199337 | 1.24 | 1.11E-01 | transcription_start_site | + | 198893 | 198893 | 7     | 29406 | AN7667 |
| 2378 | CONTIG130 | 198463 | 199337 | 1.24 | 1.11E-01 | transcription_start_site | + | 199027 | 199027 | -127  | 29407 | AN7667 |
| 2378 | CONTIG130 | 198463 | 199337 | 1.24 | 1.11E-01 | transcription_start_site | + | 200176 | 200176 | -1276 | 29408 | AN7667 |
| 625  | CONTIG130 | 205890 | 206244 | 2.28 | 4.61E-03 | transcription_start_site | - | 201840 | 201840 | -4227 | 29409 | AN7668 |
| 625  | CONTIG130 | 205890 | 206244 | 2.28 | 4.61E-03 | transcription_start_site | - | 201786 | 201786 | -4281 | 29410 | AN7668 |
| 625  | CONTIG130 | 205890 | 206244 | 2.28 | 4.61E-03 | transcription_start_site | - | 201601 | 201601 | -4466 | 29411 | AN7668 |
| 625  | CONTIG130 | 205890 | 206244 | 2.28 | 4.61E-03 | transcription_start_site | - | 201208 | 201208 | -4859 | 29412 | AN7668 |
| 2378 | CONTIG130 | 198463 | 199337 | 1.24 | 1.11E-01 | transcription_start_site | + | 202275 | 202275 | -3375 | 29413 | AN7669 |
| 2378 | CONTIG130 | 198463 | 199337 | 1.24 | 1.11E-01 | transcription_start_site | + | 202592 | 202592 | -3692 | 29414 | AN7669 |
| 2378 | CONTIG130 | 198463 | 199337 | 1.24 | 1.11E-01 | transcription_start_site | + | 203280 | 203280 | -4380 | 29415 | AN7669 |
| 2378 | CONTIG130 | 198463 | 199337 | 1.24 | 1.11E-01 | transcription_start_site | + | 203553 | 203553 | -4653 | 29416 | AN7669 |
| 625  | CONTIG130 | 205890 | 206244 | 2.28 | 4.61E-03 | transcription_start_site | + | 206461 | 206461 | -394  | 29417 | AN7670 |
| 625  | CONTIG130 | 205890 | 206244 | 2.28 | 4.61E-03 | transcription_start_site | + | 208790 | 208790 | -2723 | 29418 | AN7671 |
| 625  | CONTIG130 | 205890 | 206244 | 2.28 | 4.61E-03 | transcription_start_site | + | 209014 | 209014 | -2947 | 29419 | AN7671 |
| 625  | CONTIG130 | 205890 | 206244 | 2.28 | 4.61E-03 | transcription_start_site | + | 209111 | 209111 | -3044 | 29420 | AN7671 |
| 625  | CONTIG130 | 205890 | 206244 | 2.28 | 4.61E-03 | transcription_start_site | + | 209327 | 209327 | -3260 | 29421 | AN7671 |
| 625  | CONTIG130 | 205890 | 206244 | 2.28 | 4.61E-03 | transcription_start_site | + | 209650 | 209650 | -3583 | 29422 | AN7671 |
| 625  | CONTIG130 | 205890 | 206244 | 2.28 | 4.61E-03 | transcription_start_site | + | 210688 | 210688 | -4621 | 29423 | AN7672 |
| 2551 | CONTIG130 | 226514 | 226788 | 1.19 | 1.93E-01 | transcription_start_site | - | 224142 | 224142 | -2509 | 29441 | AN7677 |
| 2551 | CONTIG130 | 226514 | 226788 | 1.19 | 1.93E-01 | transcription_start_site | - | 223913 | 223913 | -2738 | 29442 | AN7677 |
| 2551 | CONTIG130 | 226514 | 226788 | 1.19 | 1.93E-01 | transcription_start_site | - | 223721 | 223721 | -2930 | 29443 | AN7677 |
| 2551 | CONTIG130 | 226514 | 226788 | 1.19 | 1.93E-01 | transcription_start_site | + | 225630 | 225630 | 1021  | 29446 | AN7678 |
| 2551 | CONTIG130 | 226514 | 226788 | 1.19 | 1.93E-01 | transcription_start_site | + | 229751 | 229751 | -3100 | 29447 | AN7678 |
| 2551 | CONTIG130 | 226514 | 226788 | 1.19 | 1.93E-01 | transcription_start_site | + | 230510 | 230510 | -3859 | 29448 | AN7679 |
| 2551 | CONTIG130 | 226514 | 226788 | 1.19 | 1.93E-01 | transcription_start_site | + | 230695 | 230695 | -4044 | 29449 | AN7679 |
| 2551 | CONTIG130 | 226514 | 226788 | 1.19 | 1.93E-01 | transcription_start_site | + | 231358 | 231358 | -4707 | 29450 | AN7679 |
| 667  | CONTIG130 | 236489 | 236776 | 2.23 | 5.20E-03 | transcription_start_site | - | 234428 | 234428 | -2204 | 29451 | AN7680 |
| 667  | CONTIG130 | 236489 | 236776 | 2.23 | 5.20E-03 | transcription_start_site | - | 234279 | 234279 | -2353 | 29452 | AN7680 |
| 667  | CONTIG130 | 236489 | 236776 | 2.23 | 5.20E-03 | transcription_start_site | - | 233455 | 233455 | -3177 | 29453 | AN7680 |
| 667  | CONTIG130 | 236489 | 236776 | 2.23 | 5.20E-03 | transcription_start_site | - | 236164 | 236164 | -468  | 29454 | AN7681 |
| 667  | CONTIG130 | 236489 | 236776 | 2.23 | 5.20E-03 | transcription_start_site | - | 236104 | 236104 | -528  | 29455 | AN7681 |
| 900  | CONTIG130 | 240019 | 240578 | 2    | 5.41E-03 | transcription_start_site | - | 236164 | 236164 | -4134 | 29454 | AN7681 |
| 900  | CONTIG130 | 240019 | 240578 | 2    | 5.41E-03 | transcription_start_site | - | 236104 | 236104 | -4194 | 29455 | AN7681 |
| 2388 | CONTIG130 | 240614 | 241180 | 1.24 | 1.66E-01 | transcription_start_site | - | 236164 | 236164 | -4733 | 29454 | AN7681 |
| 2388 | CONTIG130 | 240614 | 241180 | 1.24 | 1.66E-01 | transcription_start_site | - | 236104 | 236104 | -4793 | 29455 | AN7681 |
| 667  | CONTIG130 | 236489 | 236776 | 2.23 | 5.20E-03 | transcription_start_site | - | 236887 | 236887 | 254   | 29460 | AN7682 |
| 667  | CONTIG130 | 236489 | 236776 | 2.23 | 5.20E-03 | transcription_start_site | - | 237450 | 237450 | 817   | 29459 | AN7682 |
| 667  | CONTIG130 | 236489 | 236776 | 2.23 | 5.20E-03 | transcription_start_site | - | 237661 | 237661 | 1028  | 29458 | AN7682 |
| 900  | CONTIG130 | 240019 | 240578 | 2    | 5.41E-03 | transcription_start_site | - | 237841 | 237841 | -2457 | 29456 | AN7682 |
| 900  | CONTIG130 | 240019 | 240578 | 2    | 5.41E-03 | transcription_start_site | - | 237781 | 237781 | -2517 | 29457 | AN7682 |
| 900  | CONTIG130 | 240019 | 240578 | 2    | 5.41E-03 | transcription_start_site | - | 237661 | 237661 | -2637 | 29458 | AN7682 |
| 900  | CONTIG130 | 240019 | 240578 | 2    | 5.41E-03 | transcription_start_site | - | 237450 | 237450 | -2848 | 29459 | AN7682 |
| 900  | CONTIG130 | 240019 | 240578 | 2    | 5.41E-03 | transcription_start_site | - | 236887 | 236887 | -3411 | 29460 | AN7682 |
| 1529 | CONTIG130 | 242334 | 243363 | 1.57 | 5.88E-02 | transcription_start_site | - | 237841 | 237841 | -5007 | 29456 | AN7682 |

|      |           |        |        |      |          |                          |   |        |        |       |       |        |
|------|-----------|--------|--------|------|----------|--------------------------|---|--------|--------|-------|-------|--------|
| 1529 | CONTIG130 | 242334 | 243363 | 1.57 | 5.88E-02 | transcription_start_site | - | 237781 | 237781 | -5067 | 29457 | AN7682 |
| 1529 | CONTIG130 | 242334 | 243363 | 1.57 | 5.88E-02 | transcription_start_site | - | 237661 | 237661 | -5187 | 29458 | AN7682 |
| 1529 | CONTIG130 | 242334 | 243363 | 1.57 | 5.88E-02 | transcription_start_site | - | 237450 | 237450 | -5398 | 29459 | AN7682 |
| 2388 | CONTIG130 | 240614 | 241180 | 1.24 | 1.66E-01 | transcription_start_site | - | 237841 | 237841 | -3056 | 29456 | AN7682 |
| 2388 | CONTIG130 | 240614 | 241180 | 1.24 | 1.66E-01 | transcription_start_site | - | 237781 | 237781 | -3116 | 29457 | AN7682 |
| 2388 | CONTIG130 | 240614 | 241180 | 1.24 | 1.66E-01 | transcription_start_site | - | 237661 | 237661 | -3236 | 29458 | AN7682 |
| 2388 | CONTIG130 | 240614 | 241180 | 1.24 | 1.66E-01 | transcription_start_site | - | 237450 | 237450 | -3447 | 29459 | AN7682 |
| 2388 | CONTIG130 | 240614 | 241180 | 1.24 | 1.66E-01 | transcription_start_site | - | 236887 | 236887 | -4010 | 29460 | AN7682 |
| 667  | CONTIG130 | 236489 | 236776 | 2.23 | 5.20E-03 | transcription_start_site | + | 240730 | 240730 | -4097 | 29461 | AN7683 |
| 667  | CONTIG130 | 236489 | 236776 | 2.23 | 5.20E-03 | transcription_start_site | + | 240827 | 240827 | -4194 | 29462 | AN7683 |
| 667  | CONTIG130 | 236489 | 236776 | 2.23 | 5.20E-03 | transcription_start_site | + | 241147 | 241147 | -4514 | 29463 | AN7683 |
| 900  | CONTIG130 | 240019 | 240578 | 2    | 5.41E-03 | transcription_start_site | + | 240730 | 240730 | -431  | 29461 | AN7683 |
| 900  | CONTIG130 | 240019 | 240578 | 2    | 5.41E-03 | transcription_start_site | + | 240827 | 240827 | -528  | 29462 | AN7683 |
| 900  | CONTIG130 | 240019 | 240578 | 2    | 5.41E-03 | transcription_start_site | + | 241147 | 241147 | -848  | 29463 | AN7683 |
| 2388 | CONTIG130 | 240614 | 241180 | 1.24 | 1.66E-01 | transcription_start_site | + | 240827 | 240827 | 70    | 29462 | AN7683 |
| 2388 | CONTIG130 | 240614 | 241180 | 1.24 | 1.66E-01 | transcription_start_site | + | 240730 | 240730 | 167   | 29461 | AN7683 |
| 2388 | CONTIG130 | 240614 | 241180 | 1.24 | 1.66E-01 | transcription_start_site | + | 241147 | 241147 | -250  | 29463 | AN7683 |
| 900  | CONTIG130 | 240019 | 240578 | 2    | 5.41E-03 | transcription_start_site | + | 242667 | 242667 | -2368 | 29464 | AN7684 |
| 900  | CONTIG130 | 240019 | 240578 | 2    | 5.41E-03 | transcription_start_site | + | 242932 | 242932 | -2633 | 29465 | AN7684 |
| 900  | CONTIG130 | 240019 | 240578 | 2    | 5.41E-03 | transcription_start_site | + | 243884 | 243884 | -3585 | 29466 | AN7684 |
| 900  | CONTIG130 | 240019 | 240578 | 2    | 5.41E-03 | transcription_start_site | + | 243997 | 243997 | -3698 | 29467 | AN7684 |
| 1529 | CONTIG130 | 242334 | 243363 | 1.57 | 5.88E-02 | transcription_start_site | + | 242932 | 242932 | -83   | 29465 | AN7684 |
| 1529 | CONTIG130 | 242334 | 243363 | 1.57 | 5.88E-02 | transcription_start_site | + | 242667 | 242667 | 181   | 29464 | AN7684 |
| 1529 | CONTIG130 | 242334 | 243363 | 1.57 | 5.88E-02 | transcription_start_site | + | 243884 | 243884 | -1035 | 29466 | AN7684 |
| 1529 | CONTIG130 | 242334 | 243363 | 1.57 | 5.88E-02 | transcription_start_site | + | 243997 | 243997 | -1148 | 29467 | AN7684 |
| 2388 | CONTIG130 | 240614 | 241180 | 1.24 | 1.66E-01 | transcription_start_site | + | 242667 | 242667 | -1770 | 29464 | AN7684 |
| 2388 | CONTIG130 | 240614 | 241180 | 1.24 | 1.66E-01 | transcription_start_site | + | 242932 | 242932 | -2035 | 29465 | AN7684 |
| 2388 | CONTIG130 | 240614 | 241180 | 1.24 | 1.66E-01 | transcription_start_site | + | 243884 | 243884 | -2987 | 29466 | AN7684 |
| 2388 | CONTIG130 | 240614 | 241180 | 1.24 | 1.66E-01 | transcription_start_site | + | 243997 | 243997 | -3100 | 29467 | AN7684 |
| 1984 | CONTIG130 | 259969 | 260303 | 1.38 | 1.08E-01 | transcription_start_site | - | 255284 | 255284 | -4852 | 29468 | AN7686 |
| 1984 | CONTIG130 | 259969 | 260303 | 1.38 | 1.08E-01 | transcription_start_site | - | 255193 | 255193 | -4943 | 29469 | AN7686 |
| 1984 | CONTIG130 | 259969 | 260303 | 1.38 | 1.08E-01 | transcription_start_site | - | 258438 | 258438 | -1698 | 29473 | AN7687 |
| 1984 | CONTIG130 | 259969 | 260303 | 1.38 | 1.08E-01 | transcription_start_site | - | 258057 | 258057 | -2079 | 29474 | AN7687 |
| 1984 | CONTIG130 | 259969 | 260303 | 1.38 | 1.08E-01 | transcription_start_site | - | 257924 | 257924 | -2212 | 29475 | AN7687 |
| 1984 | CONTIG130 | 259969 | 260303 | 1.38 | 1.08E-01 | transcription_start_site | - | 257105 | 257105 | -3031 | 29476 | AN7687 |
| 1984 | CONTIG130 | 259969 | 260303 | 1.38 | 1.08E-01 | transcription_start_site | - | 256585 | 256585 | -3551 | 29477 | AN7687 |
| 1984 | CONTIG130 | 259969 | 260303 | 1.38 | 1.08E-01 | transcription_start_site | + | 261635 | 261635 | -1499 | 29478 | AN7689 |
| 1984 | CONTIG130 | 259969 | 260303 | 1.38 | 1.08E-01 | transcription_start_site | + | 261803 | 261803 | -1667 | 29479 | AN7689 |
| 479  | CONTIG130 | 263719 | 264068 | 2.47 | 0.00E+00 | transcription_start_site | + | 264632 | 264632 | -738  | 29480 | AN7690 |
| 479  | CONTIG130 | 263719 | 264068 | 2.47 | 0.00E+00 | transcription_start_site | + | 265244 | 265244 | -1350 | 29481 | AN7690 |
| 1984 | CONTIG130 | 259969 | 260303 | 1.38 | 1.08E-01 | transcription_start_site | + | 264632 | 264632 | -4496 | 29480 | AN7690 |
| 1984 | CONTIG130 | 259969 | 260303 | 1.38 | 1.08E-01 | transcription_start_site | + | 265244 | 265244 | -5108 | 29481 | AN7690 |
| 2121 | CONTIG130 | 266194 | 266483 | 1.33 | 1.25E-01 | transcription_start_site | + | 265244 | 265244 | 1094  | 29481 | AN7690 |
| 479  | CONTIG130 | 263719 | 264068 | 2.47 | 0.00E+00 | transcription_start_site | + | 267073 | 267073 | -3179 | 29482 | AN7691 |
| 479  | CONTIG130 | 263719 | 264068 | 2.47 | 0.00E+00 | transcription_start_site | + | 267682 | 267682 | -3788 | 29483 | AN7691 |
| 479  | CONTIG130 | 263719 | 264068 | 2.47 | 0.00E+00 | transcription_start_site | + | 268707 | 268707 | -4813 | 29484 | AN7691 |
| 2121 | CONTIG130 | 266194 | 266483 | 1.33 | 1.25E-01 | transcription_start_site | + | 267073 | 267073 | -734  | 29482 | AN7691 |
| 2121 | CONTIG130 | 266194 | 266483 | 1.33 | 1.25E-01 | transcription_start_site | + | 267682 | 267682 | -1343 | 29483 | AN7691 |
| 2121 | CONTIG130 | 266194 | 266483 | 1.33 | 1.25E-01 | transcription_start_site | + | 268707 | 268707 | -2368 | 29484 | AN7691 |
| 2268 | CONTIG130 | 285009 | 285893 | 1.28 | 1.44E-01 | transcription_start_site | + | 284070 | 284070 | 1381  | 29496 | AN7696 |
| 668  | CONTIG130 | 286879 | 287243 | 2.23 | 5.20E-03 | transcription_start_site | - | 287471 | 287471 | 410   | 29497 | AN7697 |
| 668  | CONTIG130 | 286879 | 287243 | 2.23 | 5.20E-03 | transcription_start_site | - | 285869 | 285869 | -1192 | 29498 | AN7697 |
| 668  | CONTIG130 | 286879 | 287243 | 2.23 | 5.20E-03 | transcription_start_site | - | 285184 | 285184 | -1877 | 29499 | AN7697 |
| 2268 | CONTIG130 | 285009 | 285893 | 1.28 | 1.44E-01 | transcription_start_site | - | 285184 | 285184 | -267  | 29499 | AN7697 |
| 2268 | CONTIG130 | 285009 | 285893 | 1.28 | 1.44E-01 | transcription_start_site | - | 285869 | 285869 | 418   | 29498 | AN7697 |
| 15   | CONTIG130 | 297079 | 297514 | 3.66 | 0.00E+00 | transcription_start_site | - | 293404 | 293404 | -3892 | 29504 | AN7699 |
| 15   | CONTIG130 | 297079 | 297514 | 3.66 | 0.00E+00 | transcription_start_site | - | 292713 | 292713 | -4583 | 29505 | AN7699 |

|      |           |        |        |      |          |                          |   |        |        |       |       |        |
|------|-----------|--------|--------|------|----------|--------------------------|---|--------|--------|-------|-------|--------|
| 15   | CONTIG130 | 297079 | 297514 | 3.66 | 0.00E+00 | transcription_start_site | - | 296517 | 296517 | -779  | 29506 | AN7700 |
| 1574 | CONTIG131 | 9913   | 10262  | 1.55 | 1.84E-02 | transcription_start_site | - | 7153   | 7153   | -2934 | 29529 | AN7706 |
| 1574 | CONTIG131 | 9913   | 10262  | 1.55 | 1.84E-02 | transcription_start_site | - | 7051   | 7051   | -3036 | 29530 | AN7706 |
| 1574 | CONTIG131 | 9913   | 10262  | 1.55 | 1.84E-02 | transcription_start_site | - | 6694   | 6694   | -3393 | 29531 | AN7706 |
| 1574 | CONTIG131 | 9913   | 10262  | 1.55 | 1.84E-02 | transcription_start_site | - | 6588   | 6588   | -3499 | 29532 | AN7706 |
| 1574 | CONTIG131 | 9913   | 10262  | 1.55 | 1.84E-02 | transcription_start_site | - | 6479   | 6479   | -3608 | 29533 | AN7706 |
| 1574 | CONTIG131 | 9913   | 10262  | 1.55 | 1.84E-02 | transcription_start_site | - | 6366   | 6366   | -3721 | 29534 | AN7706 |
| 1574 | CONTIG131 | 9913   | 10262  | 1.55 | 1.84E-02 | transcription_start_site | - | 6240   | 6240   | -3847 | 29535 | AN7706 |
| 1574 | CONTIG131 | 9913   | 10262  | 1.55 | 1.84E-02 | transcription_start_site | - | 9841   | 9841   | -246  | 29536 | AN7707 |
| 1574 | CONTIG131 | 9913   | 10262  | 1.55 | 1.84E-02 | transcription_start_site | - | 9517   | 9517   | -570  | 29537 | AN7707 |
| 1574 | CONTIG131 | 9913   | 10262  | 1.55 | 1.84E-02 | transcription_start_site | - | 7853   | 7853   | -2234 | 29538 | AN7707 |
| 1574 | CONTIG131 | 9913   | 10262  | 1.55 | 1.84E-02 | transcription_start_site | + | 11284  | 11284  | -1196 | 29539 | AN7708 |
| 1574 | CONTIG131 | 9913   | 10262  | 1.55 | 1.84E-02 | transcription_start_site | + | 11853  | 11853  | -1765 | 29540 | AN7708 |
| 91   | CONTIG131 | 14927  | 15276  | 3.25 | 0.00E+00 | transcription_start_site | - | 13861  | 13861  | -1240 | 29541 | AN7709 |
| 91   | CONTIG131 | 14927  | 15276  | 3.25 | 0.00E+00 | transcription_start_site | - | 13428  | 13428  | -1673 | 29542 | AN7709 |
| 91   | CONTIG131 | 14927  | 15276  | 3.25 | 0.00E+00 | transcription_start_site | - | 13319  | 13319  | -1782 | 29543 | AN7709 |
| 91   | CONTIG131 | 14927  | 15276  | 3.25 | 0.00E+00 | transcription_start_site | - | 13096  | 13096  | -2005 | 29544 | AN7709 |
| 2159 | CONTIG131 | 17707  | 18068  | 1.31 | 5.22E-02 | transcription_start_site | - | 13861  | 13861  | -4026 | 29541 | AN7709 |
| 2159 | CONTIG131 | 17707  | 18068  | 1.31 | 5.22E-02 | transcription_start_site | - | 13428  | 13428  | -4459 | 29542 | AN7709 |
| 2159 | CONTIG131 | 17707  | 18068  | 1.31 | 5.22E-02 | transcription_start_site | - | 13319  | 13319  | -4568 | 29543 | AN7709 |
| 2159 | CONTIG131 | 17707  | 18068  | 1.31 | 5.22E-02 | transcription_start_site | - | 13096  | 13096  | -4791 | 29544 | AN7709 |
| 91   | CONTIG131 | 14927  | 15276  | 3.25 | 0.00E+00 | transcription_start_site | + | 15384  | 15384  | -282  | 29545 | AN7710 |
| 91   | CONTIG131 | 14927  | 15276  | 3.25 | 0.00E+00 | transcription_start_site | + | 15456  | 15456  | -354  | 29546 | AN7710 |
| 91   | CONTIG131 | 14927  | 15276  | 3.25 | 0.00E+00 | transcription_start_site | + | 18331  | 18331  | -3229 | 29547 | AN7711 |
| 91   | CONTIG131 | 14927  | 15276  | 3.25 | 0.00E+00 | transcription_start_site | + | 18440  | 18440  | -3338 | 29548 | AN7711 |
| 91   | CONTIG131 | 14927  | 15276  | 3.25 | 0.00E+00 | transcription_start_site | + | 18702  | 18702  | -3600 | 29549 | AN7711 |
| 91   | CONTIG131 | 14927  | 15276  | 3.25 | 0.00E+00 | transcription_start_site | + | 19004  | 19004  | -3902 | 29550 | AN7711 |
| 2159 | CONTIG131 | 17707  | 18068  | 1.31 | 5.22E-02 | transcription_start_site | + | 18331  | 18331  | -443  | 29547 | AN7711 |
| 2159 | CONTIG131 | 17707  | 18068  | 1.31 | 5.22E-02 | transcription_start_site | + | 18440  | 18440  | -552  | 29548 | AN7711 |
| 2159 | CONTIG131 | 17707  | 18068  | 1.31 | 5.22E-02 | transcription_start_site | + | 18702  | 18702  | -814  | 29549 | AN7711 |
| 2159 | CONTIG131 | 17707  | 18068  | 1.31 | 5.22E-02 | transcription_start_site | + | 19004  | 19004  | -1116 | 29550 | AN7711 |
| 970  | CONTIG131 | 20253  | 20624  | 1.93 | 3.03E-03 | transcription_start_site | - | 20535  | 20535  | 96    | 29552 | AN7712 |
| 970  | CONTIG131 | 20253  | 20624  | 1.93 | 3.03E-03 | transcription_start_site | - | 20810  | 20810  | 371   | 29551 | AN7712 |
| 970  | CONTIG131 | 20253  | 20624  | 1.93 | 3.03E-03 | transcription_start_site | - | 19849  | 19849  | -589  | 29553 | AN7712 |
| 970  | CONTIG131 | 20253  | 20624  | 1.93 | 3.03E-03 | transcription_start_site | - | 19618  | 19618  | -820  | 29554 | AN7712 |
| 970  | CONTIG131 | 20253  | 20624  | 1.93 | 3.03E-03 | transcription_start_site | + | 22182  | 22182  | -1743 | 29555 | AN7713 |
| 970  | CONTIG131 | 20253  | 20624  | 1.93 | 3.03E-03 | transcription_start_site | + | 22388  | 22388  | -1949 | 29556 | AN7713 |
| 2159 | CONTIG131 | 17707  | 18068  | 1.31 | 5.22E-02 | transcription_start_site | + | 22182  | 22182  | -4294 | 29555 | AN7713 |
| 2159 | CONTIG131 | 17707  | 18068  | 1.31 | 5.22E-02 | transcription_start_site | + | 22388  | 22388  | -4500 | 29556 | AN7713 |
| 2160 | CONTIG131 | 28668  | 28948  | 1.31 | 5.22E-02 | transcription_start_site | + | 28133  | 28133  | 675   | 29559 | AN7714 |
| 2160 | CONTIG131 | 28668  | 28948  | 1.31 | 5.22E-02 | transcription_start_site | + | 29095  | 29095  | -287  | 29560 | AN7715 |
| 2160 | CONTIG131 | 28668  | 28948  | 1.31 | 5.22E-02 | transcription_start_site | + | 29258  | 29258  | -450  | 29561 | AN7715 |
| 2160 | CONTIG131 | 28668  | 28948  | 1.31 | 5.22E-02 | transcription_start_site | + | 30073  | 30073  | -1265 | 29562 | AN7715 |
| 692  | CONTIG131 | 33471  | 33745  | 2.2  | 8.69E-04 | transcription_start_site | - | 31548  | 31548  | -2060 | 29563 | AN7716 |
| 692  | CONTIG131 | 33471  | 33745  | 2.2  | 8.69E-04 | transcription_start_site | - | 33497  | 33497  | -111  | 29564 | AN7717 |
| 854  | CONTIG131 | 50571  | 50980  | 2.05 | 1.54E-03 | transcription_start_site | - | 47224  | 47224  | -3551 | 29574 | AN7722 |
| 854  | CONTIG131 | 50571  | 50980  | 2.05 | 1.54E-03 | transcription_start_site | - | 46714  | 46714  | -4061 | 29575 | AN7722 |
| 854  | CONTIG131 | 50571  | 50980  | 2.05 | 1.54E-03 | transcription_start_site | - | 45789  | 45789  | -4986 | 29576 | AN7722 |
| 854  | CONTIG131 | 50571  | 50980  | 2.05 | 1.54E-03 | transcription_start_site | - | 50118  | 50118  | -657  | 29578 | AN7724 |
| 854  | CONTIG131 | 50571  | 50980  | 2.05 | 1.54E-03 | transcription_start_site | - | 49726  | 49726  | -1049 | 29579 | AN7724 |
| 854  | CONTIG131 | 50571  | 50980  | 2.05 | 1.54E-03 | transcription_start_site | + | 51088  | 51088  | -312  | 29580 | AN7725 |
| 854  | CONTIG131 | 50571  | 50980  | 2.05 | 1.54E-03 | transcription_start_site | + | 51244  | 51244  | -468  | 29581 | AN7725 |
| 854  | CONTIG131 | 50571  | 50980  | 2.05 | 1.54E-03 | transcription_start_site | + | 51489  | 51489  | -713  | 29582 | AN7725 |
| 769  | CONTIG131 | 99690  | 100254 | 2.12 | 0.00E+00 | transcription_start_site | + | 100947 | 100947 | -975  | 29617 | AN7734 |
| 769  | CONTIG131 | 99690  | 100254 | 2.12 | 0.00E+00 | transcription_start_site | + | 101522 | 101522 | -1550 | 29618 | AN7734 |
| 2842 | CONTIG131 | 114690 | 115044 | 1.04 | 1.44E-01 | transcription_start_site | - | 111882 | 111882 | -2985 | 29626 | AN7738 |
| 2842 | CONTIG131 | 114690 | 115044 | 1.04 | 1.44E-01 | transcription_start_site | + | 114777 | 114777 | 90    | 29627 | AN7739 |



|      |           |        |        |      |          |                          |   |        |        |       |       |        |
|------|-----------|--------|--------|------|----------|--------------------------|---|--------|--------|-------|-------|--------|
| 2842 | CONTIG131 | 114690 | 115044 | 1.04 | 1.44E-01 | transcription_start_site | + | 115935 | 115935 | -1068 | 29628 | AN7739 |
| 869  | CONTIG132 | 4651   | 5020   | 2.03 | 5.20E-03 | transcription_start_site | - | 3289   | 3289   | -1546 | 29631 | AN7741 |
| 869  | CONTIG132 | 4651   | 5020   | 2.03 | 5.20E-03 | transcription_start_site | - | 2880   | 2880   | -1955 | 29632 | AN7741 |
| 2685 | CONTIG132 | 5946   | 6370   | 1.13 | 1.66E-01 | transcription_start_site | - | 3289   | 3289   | -2869 | 29631 | AN7741 |
| 2685 | CONTIG132 | 5946   | 6370   | 1.13 | 1.66E-01 | transcription_start_site | - | 2880   | 2880   | -3278 | 29632 | AN7741 |
| 2685 | CONTIG132 | 5946   | 6370   | 1.13 | 1.66E-01 | transcription_start_site | + | 11024  | 11024  | -4866 | 29633 | AN7742 |
| 2185 | CONTIG132 | 33611  | 33879  | 1.3  | 9.24E-02 | transcription_start_site | + | 34386  | 34386  | -641  | 29655 | AN7749 |
| 2185 | CONTIG132 | 33611  | 33879  | 1.3  | 9.24E-02 | transcription_start_site | + | 34545  | 34545  | -800  | 29656 | AN7749 |
| 2185 | CONTIG132 | 33611  | 33879  | 1.3  | 9.24E-02 | transcription_start_site | + | 34764  | 34764  | -1019 | 29657 | AN7749 |
| 2185 | CONTIG132 | 33611  | 33879  | 1.3  | 9.24E-02 | transcription_start_site | + | 35307  | 35307  | -1562 | 29658 | AN7749 |
| 1059 | CONTIG132 | 37362  | 37781  | 1.86 | 1.11E-02 | transcription_start_site | + | 37901  | 37901  | -329  | 29659 | AN7750 |
| 1059 | CONTIG132 | 37362  | 37781  | 1.86 | 1.11E-02 | transcription_start_site | + | 38192  | 38192  | -620  | 29660 | AN7750 |
| 1059 | CONTIG132 | 37362  | 37781  | 1.86 | 1.11E-02 | transcription_start_site | + | 38361  | 38361  | -789  | 29661 | AN7750 |
| 1059 | CONTIG132 | 37362  | 37781  | 1.86 | 1.11E-02 | transcription_start_site | + | 38493  | 38493  | -921  | 29662 | AN7750 |
| 1059 | CONTIG132 | 37362  | 37781  | 1.86 | 1.11E-02 | transcription_start_site | + | 38610  | 38610  | -1038 | 29663 | AN7750 |
| 1059 | CONTIG132 | 37362  | 37781  | 1.86 | 1.11E-02 | transcription_start_site | + | 38989  | 38989  | -1417 | 29664 | AN7750 |
| 1059 | CONTIG132 | 37362  | 37781  | 1.86 | 1.11E-02 | transcription_start_site | + | 39838  | 39838  | -2266 | 29665 | AN7750 |
| 1059 | CONTIG132 | 37362  | 37781  | 1.86 | 1.11E-02 | transcription_start_site | + | 40054  | 40054  | -2482 | 29666 | AN7750 |
| 1059 | CONTIG132 | 37362  | 37781  | 1.86 | 1.11E-02 | transcription_start_site | + | 40541  | 40541  | -2969 | 29667 | AN7750 |
| 2185 | CONTIG132 | 33611  | 33879  | 1.3  | 9.24E-02 | transcription_start_site | + | 37901  | 37901  | -4156 | 29659 | AN7750 |
| 2185 | CONTIG132 | 33611  | 33879  | 1.3  | 9.24E-02 | transcription_start_site | + | 38192  | 38192  | -4447 | 29660 | AN7750 |
| 2185 | CONTIG132 | 33611  | 33879  | 1.3  | 9.24E-02 | transcription_start_site | + | 38361  | 38361  | -4616 | 29661 | AN7750 |
| 2185 | CONTIG132 | 33611  | 33879  | 1.3  | 9.24E-02 | transcription_start_site | + | 38493  | 38493  | -4748 | 29662 | AN7750 |
| 2185 | CONTIG132 | 33611  | 33879  | 1.3  | 9.24E-02 | transcription_start_site | + | 38610  | 38610  | -4865 | 29663 | AN7750 |
| 240  | CONTIG132 | 53852  | 54201  | 2.86 | 0.00E+00 | transcription_start_site | - | 49212  | 49212  | -4814 | 29668 | AN7752 |
| 240  | CONTIG132 | 53852  | 54201  | 2.86 | 0.00E+00 | transcription_start_site | - | 48929  | 48929  | -5097 | 29669 | AN7752 |
| 240  | CONTIG132 | 53852  | 54201  | 2.86 | 0.00E+00 | transcription_start_site | - | 53659  | 53659  | -367  | 29675 | AN7754 |
| 240  | CONTIG132 | 53852  | 54201  | 2.86 | 0.00E+00 | transcription_start_site | - | 53354  | 53354  | -672  | 29676 | AN7754 |
| 240  | CONTIG132 | 53852  | 54201  | 2.86 | 0.00E+00 | transcription_start_site | - | 52696  | 52696  | -1330 | 29677 | AN7754 |
| 240  | CONTIG132 | 53852  | 54201  | 2.86 | 0.00E+00 | transcription_start_site | - | 52600  | 52600  | -1426 | 29678 | AN7754 |
| 2312 | CONTIG132 | 55217  | 56077  | 1.26 | 0.00E+00 | transcription_start_site | - | 53659  | 53659  | -1988 | 29675 | AN7754 |
| 2312 | CONTIG132 | 55217  | 56077  | 1.26 | 0.00E+00 | transcription_start_site | - | 53354  | 53354  | -2293 | 29676 | AN7754 |
| 2312 | CONTIG132 | 55217  | 56077  | 1.26 | 0.00E+00 | transcription_start_site | - | 52696  | 52696  | -2951 | 29677 | AN7754 |
| 2312 | CONTIG132 | 55217  | 56077  | 1.26 | 0.00E+00 | transcription_start_site | - | 52600  | 52600  | -3047 | 29678 | AN7754 |
| 2312 | CONTIG132 | 55217  | 56077  | 1.26 | 0.00E+00 | transcription_start_site | - | 55637  | 55637  | -10   | 29679 | AN7755 |
| 240  | CONTIG132 | 53852  | 54201  | 2.86 | 0.00E+00 | transcription_start_site | + | 55871  | 55871  | -1844 | 29680 | AN7756 |
| 240  | CONTIG132 | 53852  | 54201  | 2.86 | 0.00E+00 | transcription_start_site | + | 56652  | 56652  | -2625 | 29681 | AN7756 |
| 240  | CONTIG132 | 53852  | 54201  | 2.86 | 0.00E+00 | transcription_start_site | + | 56899  | 56899  | -2872 | 29682 | AN7756 |
| 2312 | CONTIG132 | 55217  | 56077  | 1.26 | 0.00E+00 | transcription_start_site | + | 55871  | 55871  | -224  | 29680 | AN7756 |
| 2312 | CONTIG132 | 55217  | 56077  | 1.26 | 0.00E+00 | transcription_start_site | + | 56652  | 56652  | -1005 | 29681 | AN7756 |
| 2312 | CONTIG132 | 55217  | 56077  | 1.26 | 0.00E+00 | transcription_start_site | + | 56899  | 56899  | -1252 | 29682 | AN7756 |
| 550  | CONTIG132 | 61442  | 62081  | 2.38 | 0.00E+00 | transcription_start_site | + | 62563  | 62563  | -801  | 29683 | AN7757 |
| 550  | CONTIG132 | 61442  | 62081  | 2.38 | 0.00E+00 | transcription_start_site | + | 63075  | 63075  | -1313 | 29684 | AN7757 |
| 218  | CONTIG132 | 79961  | 80600  | 2.9  | 0.00E+00 | transcription_start_site | - | 76463  | 76463  | -3817 | 29694 | AN7761 |
| 218  | CONTIG132 | 79961  | 80600  | 2.9  | 0.00E+00 | transcription_start_site | - | 76161  | 76161  | -4119 | 29695 | AN7761 |
| 770  | CONTIG132 | 116493 | 117207 | 2.12 | 0.00E+00 | transcription_start_site | - | 113300 | 113300 | -3550 | 29736 | AN7775 |
| 770  | CONTIG132 | 116493 | 117207 | 2.12 | 0.00E+00 | transcription_start_site | - | 113066 | 113066 | -3784 | 29737 | AN7775 |
| 770  | CONTIG132 | 116493 | 117207 | 2.12 | 0.00E+00 | transcription_start_site | - | 112911 | 112911 | -3939 | 29738 | AN7775 |
| 770  | CONTIG132 | 116493 | 117207 | 2.12 | 0.00E+00 | transcription_start_site | + | 116048 | 116048 | 802   | 29742 | AN7776 |
| 770  | CONTIG132 | 116493 | 117207 | 2.12 | 0.00E+00 | transcription_start_site | + | 117209 | 117209 | -359  | 29743 | AN7777 |
| 770  | CONTIG132 | 116493 | 117207 | 2.12 | 0.00E+00 | transcription_start_site | + | 119475 | 119475 | -2625 | 29744 | AN7778 |
| 770  | CONTIG132 | 116493 | 117207 | 2.12 | 0.00E+00 | transcription_start_site | + | 119862 | 119862 | -3012 | 29745 | AN7778 |
| 913  | CONTIG132 | 129978 | 130477 | 1.99 | 6.61E-03 | transcription_start_site | - | 127017 | 127017 | -3210 | 29750 | AN7781 |
| 913  | CONTIG132 | 129978 | 130477 | 1.99 | 6.61E-03 | transcription_start_site | - | 126603 | 126603 | -3624 | 29751 | AN7781 |
| 913  | CONTIG132 | 129978 | 130477 | 1.99 | 6.61E-03 | transcription_start_site | - | 126359 | 126359 | -3868 | 29752 | AN7781 |
| 1854 | CONTIG132 | 128563 | 129357 | 1.43 | 3.99E-02 | transcription_start_site | - | 127017 | 127017 | -1943 | 29750 | AN7781 |
| 1854 | CONTIG132 | 128563 | 129357 | 1.43 | 3.99E-02 | transcription_start_site | - | 126603 | 126603 | -2357 | 29751 | AN7781 |

|      |           |        |        |      |          |                          |   |        |        |       |       |        |
|------|-----------|--------|--------|------|----------|--------------------------|---|--------|--------|-------|-------|--------|
| 1854 | CONTIG132 | 128563 | 129357 | 1.43 | 3.99E-02 | transcription_start_site | - | 126359 | 126359 | -2601 | 29752 | AN7781 |
| 913  | CONTIG132 | 129978 | 130477 | 1.99 | 6.61E-03 | transcription_start_site | - | 128666 | 128666 | -1561 | 29753 | AN7782 |
| 1854 | CONTIG132 | 128563 | 129357 | 1.43 | 3.99E-02 | transcription_start_site | - | 128666 | 128666 | -294  | 29753 | AN7782 |
| 913  | CONTIG132 | 129978 | 130477 | 1.99 | 6.61E-03 | transcription_start_site | + | 129744 | 129744 | 483   | 29754 | AN7783 |
| 913  | CONTIG132 | 129978 | 130477 | 1.99 | 6.61E-03 | transcription_start_site | + | 134154 | 134154 | -3926 | 29755 | AN7783 |
| 913  | CONTIG132 | 129978 | 130477 | 1.99 | 6.61E-03 | transcription_start_site | + | 134470 | 134470 | -4242 | 29756 | AN7783 |
| 1854 | CONTIG132 | 128563 | 129357 | 1.43 | 3.99E-02 | transcription_start_site | + | 129744 | 129744 | -784  | 29754 | AN7783 |
| 1854 | CONTIG132 | 128563 | 129357 | 1.43 | 3.99E-02 | transcription_start_site | + | 134154 | 134154 | -5194 | 29755 | AN7783 |
| 1766 | CONTIG132 | 142133 | 142638 | 1.47 | 3.33E-02 | transcription_start_site | - | 142596 | 142596 | 210   | 29758 | AN7785 |
| 1766 | CONTIG132 | 142133 | 142638 | 1.47 | 3.33E-02 | transcription_start_site | - | 142861 | 142861 | 475   | 29757 | AN7785 |
| 2675 | CONTIG132 | 146108 | 147662 | 1.13 | 1.11E-01 | transcription_start_site | - | 142861 | 142861 | -4024 | 29757 | AN7785 |
| 2675 | CONTIG132 | 146108 | 147662 | 1.13 | 1.11E-01 | transcription_start_site | - | 142596 | 142596 | -4289 | 29758 | AN7785 |
| 2686 | CONTIG132 | 142738 | 143307 | 1.13 | 1.66E-01 | transcription_start_site | - | 142861 | 142861 | -161  | 29757 | AN7785 |
| 2686 | CONTIG132 | 142738 | 143307 | 1.13 | 1.66E-01 | transcription_start_site | - | 142596 | 142596 | -426  | 29758 | AN7785 |
| 2675 | CONTIG132 | 146108 | 147662 | 1.13 | 1.11E-01 | transcription_start_site | - | 144493 | 144493 | -2392 | 29759 | AN7786 |
| 2675 | CONTIG132 | 146108 | 147662 | 1.13 | 1.11E-01 | transcription_start_site | - | 144328 | 144328 | -2557 | 29760 | AN7786 |
| 2675 | CONTIG132 | 146108 | 147662 | 1.13 | 1.11E-01 | transcription_start_site | - | 145965 | 145965 | -920  | 29761 | AN7787 |
| 2675 | CONTIG132 | 146108 | 147662 | 1.13 | 1.11E-01 | transcription_start_site | - | 145711 | 145711 | -1174 | 29762 | AN7787 |
| 2675 | CONTIG132 | 146108 | 147662 | 1.13 | 1.11E-01 | transcription_start_site | - | 145235 | 145235 | -1650 | 29763 | AN7787 |
| 2675 | CONTIG132 | 146108 | 147662 | 1.13 | 1.11E-01 | transcription_start_site | - | 145064 | 145064 | -1821 | 29764 | AN7787 |
| 2675 | CONTIG132 | 146108 | 147662 | 1.13 | 1.11E-01 | transcription_start_site | - | 144886 | 144886 | -1999 | 29765 | AN7787 |
| 1766 | CONTIG132 | 142133 | 142638 | 1.47 | 3.33E-02 | transcription_start_site | + | 146315 | 146315 | -3929 | 29766 | AN7788 |
| 2675 | CONTIG132 | 146108 | 147662 | 1.13 | 1.11E-01 | transcription_start_site | + | 146315 | 146315 | 570   | 29766 | AN7788 |
| 2675 | CONTIG132 | 146108 | 147662 | 1.13 | 1.11E-01 | transcription_start_site | + | 147656 | 147656 | -771  | 29767 | AN7788 |
| 2675 | CONTIG132 | 146108 | 147662 | 1.13 | 1.11E-01 | transcription_start_site | + | 148019 | 148019 | -1134 | 29768 | AN7788 |
| 2686 | CONTIG132 | 142738 | 143307 | 1.13 | 1.66E-01 | transcription_start_site | + | 146315 | 146315 | -3292 | 29766 | AN7788 |
| 2686 | CONTIG132 | 142738 | 143307 | 1.13 | 1.66E-01 | transcription_start_site | + | 147656 | 147656 | -4633 | 29767 | AN7788 |
| 2686 | CONTIG132 | 142738 | 143307 | 1.13 | 1.66E-01 | transcription_start_site | + | 148019 | 148019 | -4996 | 29768 | AN7788 |
| 1669 | CONTIG132 | 155028 | 155387 | 1.51 | 2.64E-02 | transcription_start_site | - | 150059 | 150059 | -5148 | 29769 | AN7789 |
| 2074 | CONTIG132 | 153618 | 154777 | 1.34 | 4.45E-02 | transcription_start_site | - | 150059 | 150059 | -4138 | 29769 | AN7789 |
| 2675 | CONTIG132 | 146108 | 147662 | 1.13 | 1.11E-01 | transcription_start_site | + | 150345 | 150345 | -3460 | 29770 | AN7790 |
| 2675 | CONTIG132 | 146108 | 147662 | 1.13 | 1.11E-01 | transcription_start_site | + | 150537 | 150537 | -3652 | 29771 | AN7790 |
| 1669 | CONTIG132 | 155028 | 155387 | 1.51 | 2.64E-02 | transcription_start_site | + | 158228 | 158228 | -3020 | 29772 | AN7792 |
| 2074 | CONTIG132 | 153618 | 154777 | 1.34 | 4.45E-02 | transcription_start_site | + | 158228 | 158228 | -4030 | 29772 | AN7792 |
| 1669 | CONTIG132 | 155028 | 155387 | 1.51 | 2.64E-02 | transcription_start_site | + | 160375 | 160375 | -5167 | 29773 | AN7793 |
| 775  | CONTIG132 | 166668 | 166927 | 2.12 | 3.61E-03 | transcription_start_site | + | 167459 | 167459 | -661  | 29778 | AN7795 |
| 775  | CONTIG132 | 166668 | 166927 | 2.12 | 3.61E-03 | transcription_start_site | + | 168004 | 168004 | -1206 | 29779 | AN7795 |
| 775  | CONTIG132 | 166668 | 166927 | 2.12 | 3.61E-03 | transcription_start_site | + | 168431 | 168431 | -1633 | 29780 | AN7795 |
| 2585 | CONTIG132 | 167857 | 168956 | 1.17 | 1.33E-01 | transcription_start_site | + | 168431 | 168431 | -24   | 29780 | AN7795 |
| 2585 | CONTIG132 | 167857 | 168956 | 1.17 | 1.33E-01 | transcription_start_site | + | 168004 | 168004 | 402   | 29779 | AN7795 |
| 2585 | CONTIG132 | 167857 | 168956 | 1.17 | 1.33E-01 | transcription_start_site | + | 167459 | 167459 | 947   | 29778 | AN7795 |
| 2329 | CONTIG132 | 170342 | 170841 | 1.26 | 1.08E-01 | transcription_start_site | - | 170671 | 170671 | 79    | 29781 | AN7796 |
| 2329 | CONTIG132 | 170342 | 170841 | 1.26 | 1.08E-01 | transcription_start_site | - | 170284 | 170284 | -307  | 29782 | AN7796 |
| 2468 | CONTIG132 | 171752 | 173835 | 1.21 | 6.32E-02 | transcription_start_site | - | 170671 | 170671 | -2122 | 29781 | AN7796 |
| 2468 | CONTIG132 | 171752 | 173835 | 1.21 | 6.32E-02 | transcription_start_site | - | 170284 | 170284 | -2509 | 29782 | AN7796 |
| 2468 | CONTIG132 | 171752 | 173835 | 1.21 | 6.32E-02 | transcription_start_site | - | 172572 | 172572 | -221  | 29783 | AN7797 |
| 2329 | CONTIG132 | 170342 | 170841 | 1.26 | 1.08E-01 | transcription_start_site | + | 173209 | 173209 | -2617 | 29784 | AN7798 |
| 2468 | CONTIG132 | 171752 | 173835 | 1.21 | 6.32E-02 | transcription_start_site | + | 173209 | 173209 | -415  | 29784 | AN7798 |
| 2585 | CONTIG132 | 167857 | 168956 | 1.17 | 1.33E-01 | transcription_start_site | + | 173209 | 173209 | -4802 | 29784 | AN7798 |
| 2687 | CONTIG132 | 216301 | 216585 | 1.13 | 1.66E-01 | transcription_start_site | - | 212429 | 212429 | -4014 | 29819 | AN7814 |
| 2687 | CONTIG132 | 216301 | 216585 | 1.13 | 1.66E-01 | transcription_start_site | + | 217505 | 217505 | -1062 | 29824 | AN7815 |
| 3061 | CONTIG133 | 1651   | 1945   | 0.69 | 1.25E-01 | transcription_start_site | + | 890    | 890    | 908   | 29869 | AN7831 |
| 3061 | CONTIG133 | 1651   | 1945   | 0.69 | 1.25E-01 | transcription_start_site | + | 825    | 825    | 973   | 29868 | AN7831 |
| 3061 | CONTIG133 | 1651   | 1945   | 0.69 | 1.25E-01 | transcription_start_site | + | 725    | 725    | 1073  | 29867 | AN7831 |
| 3061 | CONTIG133 | 1651   | 1945   | 0.69 | 1.25E-01 | transcription_start_site | - | 2813   | 2813   | 1015  | 29871 | AN7832 |
| 3061 | CONTIG133 | 1651   | 1945   | 0.69 | 1.25E-01 | transcription_start_site | + | 5731   | 5731   | -3933 | 29872 | AN7833 |
| 3061 | CONTIG133 | 1651   | 1945   | 0.69 | 1.25E-01 | transcription_start_site | + | 6179   | 6179   | -4381 | 29873 | AN7833 |

|      |           |       |       |      |          |                          |   |       |       |       |       |        |
|------|-----------|-------|-------|------|----------|--------------------------|---|-------|-------|-------|-------|--------|
| 3061 | CONTIG133 | 1651  | 1945  | 0.69 | 1.25E-01 | transcription_start_site | + | 6845  | 6845  | -5047 | 29874 | AN7834 |
| 3049 | CONTIG133 | 12906 | 13268 | 0.76 | 8.01E-02 | transcription_start_site | + | 15032 | 15032 | -1945 | 29876 | AN7836 |
| 3049 | CONTIG133 | 12906 | 13268 | 0.76 | 8.01E-02 | transcription_start_site | + | 15665 | 15665 | -2578 | 29877 | AN7836 |
| 3049 | CONTIG133 | 12906 | 13268 | 0.76 | 8.01E-02 | transcription_start_site | + | 17526 | 17526 | -4439 | 29878 | AN7837 |
| 3049 | CONTIG133 | 12906 | 13268 | 0.76 | 8.01E-02 | transcription_start_site | + | 17766 | 17766 | -4679 | 29879 | AN7837 |
| 3049 | CONTIG133 | 12906 | 13268 | 0.76 | 8.01E-02 | transcription_start_site | + | 18002 | 18002 | -4915 | 29880 | AN7837 |
| 3062 | CONTIG133 | 21387 | 21656 | 0.69 | 1.25E-01 | transcription_start_site | + | 20827 | 20827 | 694   | 29885 | AN7838 |
| 3062 | CONTIG133 | 21387 | 21656 | 0.69 | 1.25E-01 | transcription_start_site | + | 25999 | 25999 | -4477 | 29886 | AN7838 |
| 3067 | CONTIG133 | 24227 | 24581 | 0.64 | 1.66E-01 | transcription_start_site | + | 25999 | 25999 | -1595 | 29886 | AN7838 |
| 3053 | CONTIG134 | 12387 | 13176 | 0.75 | 1.99E-01 | transcription_start_site | - | 7821  | 7821  | -4960 | 29951 | AN7850 |
| 3053 | CONTIG134 | 12387 | 13176 | 0.75 | 1.99E-01 | transcription_start_site | - | 7718  | 7718  | -5063 | 29952 | AN7850 |
| 3053 | CONTIG134 | 12387 | 13176 | 0.75 | 1.99E-01 | transcription_start_site | - | 12929 | 12929 | 147   | 29960 | AN7852 |
| 3053 | CONTIG134 | 12387 | 13176 | 0.75 | 1.99E-01 | transcription_start_site | - | 13045 | 13045 | 263   | 29959 | AN7852 |
| 3053 | CONTIG134 | 12387 | 13176 | 0.75 | 1.99E-01 | transcription_start_site | - | 12379 | 12379 | -402  | 29961 | AN7852 |
| 3053 | CONTIG134 | 12387 | 13176 | 0.75 | 1.99E-01 | transcription_start_site | - | 13372 | 13372 | 590   | 29958 | AN7852 |
| 3053 | CONTIG134 | 12387 | 13176 | 0.75 | 1.99E-01 | transcription_start_site | + | 14024 | 14024 | -1242 | 29962 | AN7853 |
| 3053 | CONTIG134 | 12387 | 13176 | 0.75 | 1.99E-01 | transcription_start_site | + | 14069 | 14069 | -1287 | 29963 | AN7853 |
| 3053 | CONTIG134 | 12387 | 13176 | 0.75 | 1.99E-01 | transcription_start_site | + | 17199 | 17199 | -4417 | 29964 | AN7854 |
| 3053 | CONTIG134 | 12387 | 13176 | 0.75 | 1.99E-01 | transcription_start_site | + | 17369 | 17369 | -4587 | 29965 | AN7854 |
| 3037 | CONTIG134 | 25594 | 25943 | 0.81 | 1.44E-01 | transcription_start_site | - | 21641 | 21641 | -4127 | 29966 | AN7855 |
| 3037 | CONTIG134 | 25594 | 25943 | 0.81 | 1.44E-01 | transcription_start_site | - | 20894 | 20894 | -4874 | 29967 | AN7855 |
| 3037 | CONTIG134 | 25594 | 25943 | 0.81 | 1.44E-01 | transcription_start_site | - | 20625 | 20625 | -5143 | 29968 | AN7855 |
| 2981 | CONTIG134 | 27754 | 28122 | 0.93 | 8.01E-02 | transcription_start_site | - | 23932 | 23932 | -4006 | 29974 | AN7856 |
| 2981 | CONTIG134 | 27754 | 28122 | 0.93 | 8.01E-02 | transcription_start_site | - | 23410 | 23410 | -4528 | 29975 | AN7856 |
| 2981 | CONTIG134 | 27754 | 28122 | 0.93 | 8.01E-02 | transcription_start_site | - | 23007 | 23007 | -4931 | 29976 | AN7856 |
| 3037 | CONTIG134 | 25594 | 25943 | 0.81 | 1.44E-01 | transcription_start_site | - | 23932 | 23932 | -1836 | 29974 | AN7856 |
| 3037 | CONTIG134 | 25594 | 25943 | 0.81 | 1.44E-01 | transcription_start_site | - | 23410 | 23410 | -2358 | 29975 | AN7856 |
| 3037 | CONTIG134 | 25594 | 25943 | 0.81 | 1.44E-01 | transcription_start_site | - | 23007 | 23007 | -2761 | 29976 | AN7856 |
| 2819 | CONTIG134 | 29494 | 29904 | 1.05 | 4.36E-02 | transcription_start_site | - | 26361 | 26361 | -3338 | 29977 | AN7857 |
| 2981 | CONTIG134 | 27754 | 28122 | 0.93 | 8.01E-02 | transcription_start_site | - | 26361 | 26361 | -1577 | 29977 | AN7857 |
| 3037 | CONTIG134 | 25594 | 25943 | 0.81 | 1.44E-01 | transcription_start_site | - | 26361 | 26361 | 592   | 29977 | AN7857 |
| 2981 | CONTIG134 | 27754 | 28122 | 0.93 | 8.01E-02 | transcription_start_site | + | 27783 | 27783 | 155   | 29979 | AN7858 |
| 2981 | CONTIG134 | 27754 | 28122 | 0.93 | 8.01E-02 | transcription_start_site | + | 27433 | 27433 | 505   | 29978 | AN7858 |
| 3037 | CONTIG134 | 25594 | 25943 | 0.81 | 1.44E-01 | transcription_start_site | + | 27433 | 27433 | -1664 | 29978 | AN7858 |
| 3037 | CONTIG134 | 25594 | 25943 | 0.81 | 1.44E-01 | transcription_start_site | + | 27783 | 27783 | -2014 | 29979 | AN7858 |
| 2819 | CONTIG134 | 29494 | 29904 | 1.05 | 4.36E-02 | transcription_start_site | + | 31154 | 31154 | -1455 | 29980 | AN7859 |
| 2819 | CONTIG134 | 29494 | 29904 | 1.05 | 4.36E-02 | transcription_start_site | + | 31270 | 31270 | -1571 | 29981 | AN7859 |
| 2819 | CONTIG134 | 29494 | 29904 | 1.05 | 4.36E-02 | transcription_start_site | + | 32600 | 32600 | -2901 | 29982 | AN7859 |
| 2981 | CONTIG134 | 27754 | 28122 | 0.93 | 8.01E-02 | transcription_start_site | + | 31154 | 31154 | -3216 | 29980 | AN7859 |
| 2981 | CONTIG134 | 27754 | 28122 | 0.93 | 8.01E-02 | transcription_start_site | + | 31270 | 31270 | -3332 | 29981 | AN7859 |
| 2981 | CONTIG134 | 27754 | 28122 | 0.93 | 8.01E-02 | transcription_start_site | + | 32600 | 32600 | -4662 | 29982 | AN7859 |
| 2770 | CONTIG134 | 60080 | 60444 | 1.08 | 2.18E-02 | transcription_start_site | - | 57205 | 57205 | -3057 | 29999 | AN7865 |
| 2770 | CONTIG134 | 60080 | 60444 | 1.08 | 2.18E-02 | transcription_start_site | - | 57154 | 57154 | -3108 | 30000 | AN7865 |
| 2770 | CONTIG134 | 60080 | 60444 | 1.08 | 2.18E-02 | transcription_start_site | - | 57019 | 57019 | -3243 | 30001 | AN7865 |
| 2770 | CONTIG134 | 60080 | 60444 | 1.08 | 2.18E-02 | transcription_start_site | - | 56785 | 56785 | -3477 | 30002 | AN7865 |
| 2770 | CONTIG134 | 60080 | 60444 | 1.08 | 2.18E-02 | transcription_start_site | - | 56127 | 56127 | -4135 | 30003 | AN7865 |
| 2770 | CONTIG134 | 60080 | 60444 | 1.08 | 2.18E-02 | transcription_start_site | - | 59689 | 59689 | -573  | 30006 | AN7866 |
| 2770 | CONTIG134 | 60080 | 60444 | 1.08 | 2.18E-02 | transcription_start_site | - | 59421 | 59421 | -841  | 30007 | AN7866 |
| 2770 | CONTIG134 | 60080 | 60444 | 1.08 | 2.18E-02 | transcription_start_site | - | 59026 | 59026 | -1236 | 30008 | AN7866 |
| 2770 | CONTIG134 | 60080 | 60444 | 1.08 | 2.18E-02 | transcription_start_site | - | 58810 | 58810 | -1452 | 30009 | AN7866 |
| 3043 | CONTIG134 | 64505 | 64854 | 0.78 | 1.66E-01 | transcription_start_site | - | 59689 | 59689 | -4990 | 30006 | AN7866 |
| 2770 | CONTIG134 | 60080 | 60444 | 1.08 | 2.18E-02 | transcription_start_site | + | 60244 | 60244 | 18    | 30010 | AN7867 |
| 2770 | CONTIG134 | 60080 | 60444 | 1.08 | 2.18E-02 | transcription_start_site | + | 60596 | 60596 | -334  | 30011 | AN7867 |
| 2770 | CONTIG134 | 60080 | 60444 | 1.08 | 2.18E-02 | transcription_start_site | + | 61214 | 61214 | -952  | 30012 | AN7867 |
| 2770 | CONTIG134 | 60080 | 60444 | 1.08 | 2.18E-02 | transcription_start_site | + | 61647 | 61647 | -1385 | 30013 | AN7867 |
| 2770 | CONTIG134 | 60080 | 60444 | 1.08 | 2.18E-02 | transcription_start_site | + | 62031 | 62031 | -1769 | 30014 | AN7867 |
| 3043 | CONTIG134 | 64505 | 64854 | 0.78 | 1.66E-01 | transcription_start_site | - | 63886 | 63886 | -793  | 30015 | AN7868 |

|      |           |       |       |      |          |                          |   |       |       |       |       |        |
|------|-----------|-------|-------|------|----------|--------------------------|---|-------|-------|-------|-------|--------|
| 3043 | CONTIG134 | 64505 | 64854 | 0.78 | 1.66E-01 | transcription_start_site | - | 63741 | 63741 | -938  | 30016 | AN7868 |
| 3043 | CONTIG134 | 64505 | 64854 | 0.78 | 1.66E-01 | transcription_start_site | - | 63362 | 63362 | -1317 | 30017 | AN7868 |
| 3043 | CONTIG134 | 64505 | 64854 | 0.78 | 1.66E-01 | transcription_start_site | - | 63088 | 63088 | -1591 | 30018 | AN7868 |
| 3043 | CONTIG134 | 64505 | 64854 | 0.78 | 1.66E-01 | transcription_start_site | - | 65262 | 65262 | 582   | 30029 | AN7869 |
| 3043 | CONTIG134 | 64505 | 64854 | 0.78 | 1.66E-01 | transcription_start_site | - | 65328 | 65328 | 648   | 30028 | AN7869 |
| 3043 | CONTIG134 | 64505 | 64854 | 0.78 | 1.66E-01 | transcription_start_site | - | 65647 | 65647 | 967   | 30027 | AN7869 |
| 3052 | CONTIG134 | 69695 | 70419 | 0.75 | 1.79E-01 | transcription_start_site | - | 68303 | 68303 | -1754 | 30019 | AN7869 |
| 3052 | CONTIG134 | 69695 | 70419 | 0.75 | 1.79E-01 | transcription_start_site | - | 67879 | 67879 | -2178 | 30020 | AN7869 |
| 3052 | CONTIG134 | 69695 | 70419 | 0.75 | 1.79E-01 | transcription_start_site | - | 67411 | 67411 | -2646 | 30021 | AN7869 |
| 3052 | CONTIG134 | 69695 | 70419 | 0.75 | 1.79E-01 | transcription_start_site | - | 67065 | 67065 | -2992 | 30022 | AN7869 |
| 3052 | CONTIG134 | 69695 | 70419 | 0.75 | 1.79E-01 | transcription_start_site | - | 66458 | 66458 | -3599 | 30023 | AN7869 |
| 3052 | CONTIG134 | 69695 | 70419 | 0.75 | 1.79E-01 | transcription_start_site | - | 66221 | 66221 | -3836 | 30024 | AN7869 |
| 3052 | CONTIG134 | 69695 | 70419 | 0.75 | 1.79E-01 | transcription_start_site | - | 66077 | 66077 | -3980 | 30025 | AN7869 |
| 3052 | CONTIG134 | 69695 | 70419 | 0.75 | 1.79E-01 | transcription_start_site | - | 65927 | 65927 | -4130 | 30026 | AN7869 |
| 3052 | CONTIG134 | 69695 | 70419 | 0.75 | 1.79E-01 | transcription_start_site | - | 65647 | 65647 | -4410 | 30027 | AN7869 |
| 3052 | CONTIG134 | 69695 | 70419 | 0.75 | 1.79E-01 | transcription_start_site | - | 65328 | 65328 | -4729 | 30028 | AN7869 |
| 3052 | CONTIG134 | 69695 | 70419 | 0.75 | 1.79E-01 | transcription_start_site | - | 65262 | 65262 | -4795 | 30029 | AN7869 |
| 1683 | CONTIG134 | 74720 | 76494 | 1.5  | 3.03E-03 | transcription_start_site | - | 70915 | 70915 | -4692 | 30030 | AN7870 |
| 1683 | CONTIG134 | 74720 | 76494 | 1.5  | 3.03E-03 | transcription_start_site | - | 70516 | 70516 | -5091 | 30031 | AN7870 |
| 1683 | CONTIG134 | 74720 | 76494 | 1.5  | 3.03E-03 | transcription_start_site | - | 70001 | 70001 | -5606 | 30032 | AN7870 |
| 3052 | CONTIG134 | 69695 | 70419 | 0.75 | 1.79E-01 | transcription_start_site | - | 70001 | 70001 | -56   | 30032 | AN7870 |
| 3052 | CONTIG134 | 69695 | 70419 | 0.75 | 1.79E-01 | transcription_start_site | - | 70516 | 70516 | 459   | 30031 | AN7870 |
| 3052 | CONTIG134 | 69695 | 70419 | 0.75 | 1.79E-01 | transcription_start_site | - | 70915 | 70915 | 858   | 30030 | AN7870 |
| 3052 | CONTIG134 | 69695 | 70419 | 0.75 | 1.79E-01 | transcription_start_site | + | 71896 | 71896 | -1839 | 30033 | AN7871 |
| 3052 | CONTIG134 | 69695 | 70419 | 0.75 | 1.79E-01 | transcription_start_site | + | 72285 | 72285 | -2228 | 30034 | AN7871 |
| 1683 | CONTIG134 | 74720 | 76494 | 1.5  | 3.03E-03 | transcription_start_site | - | 76663 | 76663 | 1056  | 30035 | AN7872 |
| 2652 | CONTIG134 | 76970 | 77310 | 1.14 | 2.62E-02 | transcription_start_site | - | 76663 | 76663 | -477  | 30035 | AN7872 |
| 1930 | CONTIG135 | 7371  | 7855  | 1.39 | 1.44E-02 | transcription_start_site | - | 8810  | 8810  | 1197  | 30036 | AN7873 |
| 1930 | CONTIG135 | 7371  | 7855  | 1.39 | 1.44E-02 | transcription_start_site | - | 3461  | 3461  | -4152 | 30037 | AN7873 |
| 1930 | CONTIG135 | 7371  | 7855  | 1.39 | 1.44E-02 | transcription_start_site | - | 2914  | 2914  | -4699 | 30038 | AN7873 |
| 1930 | CONTIG135 | 7371  | 7855  | 1.39 | 1.44E-02 | transcription_start_site | - | 2748  | 2748  | -4865 | 30039 | AN7873 |
| 2807 | CONTIG135 | 3541  | 3800  | 1.06 | 1.08E-01 | transcription_start_site | - | 3461  | 3461  | -209  | 30037 | AN7873 |
| 2807 | CONTIG135 | 3541  | 3800  | 1.06 | 1.08E-01 | transcription_start_site | - | 2914  | 2914  | -756  | 30038 | AN7873 |
| 2807 | CONTIG135 | 3541  | 3800  | 1.06 | 1.08E-01 | transcription_start_site | - | 2748  | 2748  | -922  | 30039 | AN7873 |
| 2861 | CONTIG135 | 2551  | 3135  | 1.03 | 1.07E-01 | transcription_start_site | - | 2914  | 2914  | 71    | 30038 | AN7873 |
| 2861 | CONTIG135 | 2551  | 3135  | 1.03 | 1.07E-01 | transcription_start_site | - | 2748  | 2748  | -95   | 30039 | AN7873 |
| 2861 | CONTIG135 | 2551  | 3135  | 1.03 | 1.07E-01 | transcription_start_site | - | 3461  | 3461  | 618   | 30037 | AN7873 |
| 1930 | CONTIG135 | 7371  | 7855  | 1.39 | 1.44E-02 | transcription_start_site | + | 9685  | 9685  | -2072 | 30040 | AN7874 |
| 1930 | CONTIG135 | 7371  | 7855  | 1.39 | 1.44E-02 | transcription_start_site | + | 9907  | 9907  | -2294 | 30041 | AN7874 |
| 1930 | CONTIG135 | 7371  | 7855  | 1.39 | 1.44E-02 | transcription_start_site | + | 12090 | 12090 | -4477 | 30045 | AN7876 |
| 1930 | CONTIG135 | 7371  | 7855  | 1.39 | 1.44E-02 | transcription_start_site | + | 12279 | 12279 | -4666 | 30046 | AN7876 |
| 1930 | CONTIG135 | 7371  | 7855  | 1.39 | 1.44E-02 | transcription_start_site | + | 12477 | 12477 | -4864 | 30047 | AN7876 |
| 2966 | CONTIG135 | 16669 | 17388 | 0.95 | 1.66E-01 | transcription_start_site | - | 14932 | 14932 | -2096 | 30049 | AN7877 |
| 2966 | CONTIG135 | 16669 | 17388 | 0.95 | 1.66E-01 | transcription_start_site | - | 14636 | 14636 | -2392 | 30050 | AN7877 |
| 2966 | CONTIG135 | 16669 | 17388 | 0.95 | 1.66E-01 | transcription_start_site | + | 15719 | 15719 | 1309  | 30052 | AN7878 |
| 2029 | CONTIG135 | 24537 | 26236 | 1.36 | 1.81E-02 | transcription_start_site | - | 22146 | 22146 | -3240 | 30053 | AN7879 |
| 2029 | CONTIG135 | 24537 | 26236 | 1.36 | 1.81E-02 | transcription_start_site | - | 21867 | 21867 | -3519 | 30054 | AN7879 |
| 2029 | CONTIG135 | 24537 | 26236 | 1.36 | 1.81E-02 | transcription_start_site | - | 20769 | 20769 | -4617 | 30055 | AN7879 |
| 2029 | CONTIG135 | 24537 | 26236 | 1.36 | 1.81E-02 | transcription_start_site | - | 20471 | 20471 | -4915 | 30056 | AN7879 |
| 2029 | CONTIG135 | 24537 | 26236 | 1.36 | 1.81E-02 | transcription_start_site | - | 19755 | 19755 | -5631 | 30057 | AN7879 |
| 2966 | CONTIG135 | 16669 | 17388 | 0.95 | 1.66E-01 | transcription_start_site | - | 17633 | 17633 | 604   | 30060 | AN7879 |
| 2966 | CONTIG135 | 16669 | 17388 | 0.95 | 1.66E-01 | transcription_start_site | - | 18078 | 18078 | 1049  | 30059 | AN7879 |
| 2966 | CONTIG135 | 16669 | 17388 | 0.95 | 1.66E-01 | transcription_start_site | - | 18232 | 18232 | 1203  | 30058 | AN7879 |
| 2029 | CONTIG135 | 24537 | 26236 | 1.36 | 1.81E-02 | transcription_start_site | + | 24063 | 24063 | 1323  | 30063 | AN7880 |
| 2029 | CONTIG135 | 24537 | 26236 | 1.36 | 1.81E-02 | transcription_start_site | + | 28692 | 28692 | -3305 | 30064 | AN7880 |
| 2029 | CONTIG135 | 24537 | 26236 | 1.36 | 1.81E-02 | transcription_start_site | + | 28779 | 28779 | -3392 | 30065 | AN7880 |
| 2029 | CONTIG135 | 24537 | 26236 | 1.36 | 1.81E-02 | transcription_start_site | + | 28854 | 28854 | -3467 | 30066 | AN7880 |

|      |           |        |        |      |          |                          |   |        |        |       |       |        |
|------|-----------|--------|--------|------|----------|--------------------------|---|--------|--------|-------|-------|--------|
| 2862 | CONTIG135 | 37052  | 37626  | 1.03 | 1.07E-01 | transcription_start_site | - | 37005  | 37005  | -334  | 30073 | AN7883 |
| 2862 | CONTIG135 | 37052  | 37626  | 1.03 | 1.07E-01 | transcription_start_site | - | 36730  | 36730  | -609  | 30074 | AN7883 |
| 2862 | CONTIG135 | 37052  | 37626  | 1.03 | 1.07E-01 | transcription_start_site | - | 36506  | 36506  | -833  | 30075 | AN7883 |
| 2862 | CONTIG135 | 37052  | 37626  | 1.03 | 1.07E-01 | transcription_start_site | + | 38104  | 38104  | -765  | 30076 | AN7884 |
| 2862 | CONTIG135 | 37052  | 37626  | 1.03 | 1.07E-01 | transcription_start_site | + | 38667  | 38667  | -1328 | 30077 | AN7884 |
| 1586 | CONTIG135 | 79876  | 80321  | 1.54 | 1.30E-02 | transcription_start_site | - | 79746  | 79746  | -352  | 30101 | AN7892 |
| 1363 | CONTIG135 | 87016  | 87360  | 1.65 | 7.85E-03 | transcription_start_site | - | 85151  | 85151  | -2037 | 30102 | AN7893 |
| 1363 | CONTIG135 | 87016  | 87360  | 1.65 | 7.85E-03 | transcription_start_site | - | 84780  | 84780  | -2408 | 30103 | AN7893 |
| 1363 | CONTIG135 | 87016  | 87360  | 1.65 | 7.85E-03 | transcription_start_site | - | 84414  | 84414  | -2774 | 30104 | AN7893 |
| 1363 | CONTIG135 | 87016  | 87360  | 1.65 | 7.85E-03 | transcription_start_site | + | 87701  | 87701  | -513  | 30106 | AN7895 |
| 1363 | CONTIG135 | 87016  | 87360  | 1.65 | 7.85E-03 | transcription_start_site | + | 88333  | 88333  | -1145 | 30107 | AN7895 |
| 1363 | CONTIG135 | 87016  | 87360  | 1.65 | 7.85E-03 | transcription_start_site | + | 91427  | 91427  | -4239 | 30108 | AN7896 |
| 1363 | CONTIG135 | 87016  | 87360  | 1.65 | 7.85E-03 | transcription_start_site | + | 91725  | 91725  | -4537 | 30109 | AN7896 |
| 1363 | CONTIG135 | 87016  | 87360  | 1.65 | 7.85E-03 | transcription_start_site | + | 92139  | 92139  | -4951 | 30110 | AN7896 |
| 2344 | CONTIG135 | 96770  | 97119  | 1.25 | 3.33E-02 | transcription_start_site | - | 95037  | 95037  | -1907 | 30113 | AN7897 |
| 2344 | CONTIG135 | 96770  | 97119  | 1.25 | 3.33E-02 | transcription_start_site | - | 93849  | 93849  | -3095 | 30114 | AN7897 |
| 2344 | CONTIG135 | 96770  | 97119  | 1.25 | 3.33E-02 | transcription_start_site | - | 97640  | 97640  | 695   | 30115 | AN7898 |
| 2344 | CONTIG135 | 96770  | 97119  | 1.25 | 3.33E-02 | transcription_start_site | - | 96120  | 96120  | -824  | 30116 | AN7898 |
| 2344 | CONTIG135 | 96770  | 97119  | 1.25 | 3.33E-02 | transcription_start_site | + | 98425  | 98425  | -1480 | 30117 | AN7899 |
| 1684 | CONTIG135 | 128790 | 130104 | 1.5  | 1.57E-02 | transcription_start_site | - | 127484 | 127484 | -1963 | 30140 | AN7908 |
| 3033 | CONTIG135 | 132005 | 133554 | 0.84 | 1.47E-01 | transcription_start_site | - | 127484 | 127484 | -5295 | 30140 | AN7908 |
| 1684 | CONTIG135 | 128790 | 130104 | 1.5  | 1.57E-02 | transcription_start_site | - | 128916 | 128916 | -531  | 30143 | AN7909 |
| 1684 | CONTIG135 | 128790 | 130104 | 1.5  | 1.57E-02 | transcription_start_site | - | 128178 | 128178 | -1269 | 30144 | AN7909 |
| 3000 | CONTIG135 | 137930 | 138284 | 0.92 | 1.93E-01 | transcription_start_site | - | 134597 | 134597 | -3510 | 30141 | AN7909 |
| 3000 | CONTIG135 | 137930 | 138284 | 0.92 | 1.93E-01 | transcription_start_site | - | 134251 | 134251 | -3856 | 30142 | AN7909 |
| 3033 | CONTIG135 | 132005 | 133554 | 0.84 | 1.47E-01 | transcription_start_site | - | 134251 | 134251 | 1471  | 30142 | AN7909 |
| 3033 | CONTIG135 | 132005 | 133554 | 0.84 | 1.47E-01 | transcription_start_site | - | 128916 | 128916 | -3863 | 30143 | AN7909 |
| 3033 | CONTIG135 | 132005 | 133554 | 0.84 | 1.47E-01 | transcription_start_site | - | 128178 | 128178 | -4601 | 30144 | AN7909 |
| 1851 | CONTIG135 | 140645 | 141744 | 1.43 | 2.12E-02 | transcription_start_site | - | 137290 | 137290 | -3904 | 30145 | AN7911 |
| 1851 | CONTIG135 | 140645 | 141744 | 1.43 | 2.12E-02 | transcription_start_site | - | 137024 | 137024 | -4170 | 30146 | AN7911 |
| 3000 | CONTIG135 | 137930 | 138284 | 0.92 | 1.93E-01 | transcription_start_site | - | 137290 | 137290 | -817  | 30145 | AN7911 |
| 3000 | CONTIG135 | 137930 | 138284 | 0.92 | 1.93E-01 | transcription_start_site | - | 137024 | 137024 | -1083 | 30146 | AN7911 |
| 3000 | CONTIG135 | 137930 | 138284 | 0.92 | 1.93E-01 | transcription_start_site | + | 137904 | 137904 | 203   | 30148 | AN7912 |
| 3000 | CONTIG135 | 137930 | 138284 | 0.92 | 1.93E-01 | transcription_start_site | + | 137660 | 137660 | 447   | 30147 | AN7912 |
| 3033 | CONTIG135 | 132005 | 133554 | 0.84 | 1.47E-01 | transcription_start_site | + | 137660 | 137660 | -4880 | 30147 | AN7912 |
| 3033 | CONTIG135 | 132005 | 133554 | 0.84 | 1.47E-01 | transcription_start_site | + | 137904 | 137904 | -5124 | 30148 | AN7912 |
| 1587 | CONTIG135 | 144530 | 146082 | 1.54 | 1.30E-02 | transcription_start_site | - | 140860 | 140860 | -4446 | 30149 | AN7913 |
| 1851 | CONTIG135 | 140645 | 141744 | 1.43 | 2.12E-02 | transcription_start_site | - | 140860 | 140860 | -334  | 30149 | AN7913 |
| 1851 | CONTIG135 | 140645 | 141744 | 1.43 | 2.12E-02 | transcription_start_site | + | 141414 | 141414 | -219  | 30150 | AN7914 |
| 1851 | CONTIG135 | 140645 | 141744 | 1.43 | 2.12E-02 | transcription_start_site | + | 141730 | 141730 | -535  | 30151 | AN7914 |
| 3000 | CONTIG135 | 137930 | 138284 | 0.92 | 1.93E-01 | transcription_start_site | + | 141414 | 141414 | -3307 | 30150 | AN7914 |
| 3000 | CONTIG135 | 137930 | 138284 | 0.92 | 1.93E-01 | transcription_start_site | + | 141730 | 141730 | -3623 | 30151 | AN7914 |
| 1587 | CONTIG135 | 144530 | 146082 | 1.54 | 1.30E-02 | transcription_start_site | - | 145379 | 145379 | 73    | 30154 | AN7915 |
| 1587 | CONTIG135 | 144530 | 146082 | 1.54 | 1.30E-02 | transcription_start_site | - | 145866 | 145866 | 560   | 30153 | AN7915 |
| 1587 | CONTIG135 | 144530 | 146082 | 1.54 | 1.30E-02 | transcription_start_site | - | 146016 | 146016 | 710   | 30152 | AN7915 |
| 2864 | CONTIG135 | 146180 | 146468 | 1.03 | 1.25E-01 | transcription_start_site | - | 146016 | 146016 | -308  | 30152 | AN7915 |
| 2864 | CONTIG135 | 146180 | 146468 | 1.03 | 1.25E-01 | transcription_start_site | - | 145866 | 145866 | -458  | 30153 | AN7915 |
| 2864 | CONTIG135 | 146180 | 146468 | 1.03 | 1.25E-01 | transcription_start_site | - | 145379 | 145379 | -945  | 30154 | AN7915 |
| 2864 | CONTIG135 | 146180 | 146468 | 1.03 | 1.25E-01 | transcription_start_site | - | 147420 | 147420 | 1096  | 30160 | AN7916 |
| 2576 | CONTIG135 | 160055 | 160329 | 1.17 | 6.84E-02 | transcription_start_site | - | 155250 | 155250 | -4942 | 30166 | AN7919 |
| 2999 | CONTIG135 | 156380 | 156959 | 0.92 | 1.79E-01 | transcription_start_site | - | 155250 | 155250 | -1419 | 30166 | AN7919 |
| 2999 | CONTIG135 | 156380 | 156959 | 0.92 | 1.79E-01 | transcription_start_site | - | 154941 | 154941 | -1728 | 30167 | AN7919 |
| 2999 | CONTIG135 | 156380 | 156959 | 0.92 | 1.79E-01 | transcription_start_site | - | 154666 | 154666 | -2003 | 30168 | AN7919 |
| 2999 | CONTIG135 | 156380 | 156959 | 0.92 | 1.79E-01 | transcription_start_site | - | 153883 | 153883 | -2786 | 30169 | AN7919 |
| 2999 | CONTIG135 | 156380 | 156959 | 0.92 | 1.79E-01 | transcription_start_site | - | 153673 | 153673 | -2996 | 30170 | AN7919 |
| 2999 | CONTIG135 | 156380 | 156959 | 0.92 | 1.79E-01 | transcription_start_site | + | 155882 | 155882 | 787   | 30171 | AN7920 |
| 2576 | CONTIG135 | 160055 | 160329 | 1.17 | 6.84E-02 | transcription_start_site | + | 159614 | 159614 | 578   | 30172 | AN7921 |

|      |           |        |        |      |          |                          |   |        |        |       |       |        |
|------|-----------|--------|--------|------|----------|--------------------------|---|--------|--------|-------|-------|--------|
| 2576 | CONTIG135 | 160055 | 160329 | 1.17 | 6.84E-02 | transcription_start_site | + | 161606 | 161606 | -1414 | 30173 | AN7921 |
| 2964 | CONTIG135 | 161630 | 162814 | 0.95 | 1.59E-01 | transcription_start_site | + | 161606 | 161606 | 616   | 30173 | AN7921 |
| 2999 | CONTIG135 | 156380 | 156959 | 0.92 | 1.79E-01 | transcription_start_site | + | 159614 | 159614 | -2944 | 30172 | AN7921 |
| 2999 | CONTIG135 | 156380 | 156959 | 0.92 | 1.79E-01 | transcription_start_site | + | 161606 | 161606 | -4936 | 30173 | AN7921 |
| 2918 | CONTIG135 | 163215 | 163479 | 0.99 | 1.44E-01 | transcription_start_site | - | 162833 | 162833 | -514  | 30174 | AN7922 |
| 2918 | CONTIG135 | 163215 | 163479 | 0.99 | 1.44E-01 | transcription_start_site | - | 162421 | 162421 | -926  | 30175 | AN7922 |
| 2918 | CONTIG135 | 163215 | 163479 | 0.99 | 1.44E-01 | transcription_start_site | - | 162152 | 162152 | -1195 | 30176 | AN7922 |
| 2919 | CONTIG135 | 166730 | 167015 | 0.99 | 1.44E-01 | transcription_start_site | - | 162833 | 162833 | -4039 | 30174 | AN7922 |
| 2919 | CONTIG135 | 166730 | 167015 | 0.99 | 1.44E-01 | transcription_start_site | - | 162421 | 162421 | -4451 | 30175 | AN7922 |
| 2919 | CONTIG135 | 166730 | 167015 | 0.99 | 1.44E-01 | transcription_start_site | - | 162152 | 162152 | -4720 | 30176 | AN7922 |
| 2964 | CONTIG135 | 161630 | 162814 | 0.95 | 1.59E-01 | transcription_start_site | - | 162152 | 162152 | -70   | 30176 | AN7922 |
| 2964 | CONTIG135 | 161630 | 162814 | 0.95 | 1.59E-01 | transcription_start_site | - | 162421 | 162421 | 199   | 30175 | AN7922 |
| 2964 | CONTIG135 | 161630 | 162814 | 0.95 | 1.59E-01 | transcription_start_site | - | 162833 | 162833 | 611   | 30174 | AN7922 |
| 2576 | CONTIG135 | 160055 | 160329 | 1.17 | 6.84E-02 | transcription_start_site | + | 163151 | 163151 | -2959 | 30177 | AN7923 |
| 2918 | CONTIG135 | 163215 | 163479 | 0.99 | 1.44E-01 | transcription_start_site | + | 163151 | 163151 | 196   | 30177 | AN7923 |
| 2964 | CONTIG135 | 161630 | 162814 | 0.95 | 1.59E-01 | transcription_start_site | + | 163151 | 163151 | -929  | 30177 | AN7923 |
| 2576 | CONTIG135 | 160055 | 160329 | 1.17 | 6.84E-02 | transcription_start_site | + | 164756 | 164756 | -4564 | 30178 | AN7924 |
| 2576 | CONTIG135 | 160055 | 160329 | 1.17 | 6.84E-02 | transcription_start_site | + | 164984 | 164984 | -4792 | 30179 | AN7924 |
| 2918 | CONTIG135 | 163215 | 163479 | 0.99 | 1.44E-01 | transcription_start_site | + | 164756 | 164756 | -1409 | 30178 | AN7924 |
| 2918 | CONTIG135 | 163215 | 163479 | 0.99 | 1.44E-01 | transcription_start_site | + | 164984 | 164984 | -1637 | 30179 | AN7924 |
| 2964 | CONTIG135 | 161630 | 162814 | 0.95 | 1.59E-01 | transcription_start_site | + | 164756 | 164756 | -2534 | 30178 | AN7924 |
| 2964 | CONTIG135 | 161630 | 162814 | 0.95 | 1.59E-01 | transcription_start_site | + | 164984 | 164984 | -2762 | 30179 | AN7924 |
| 2919 | CONTIG135 | 166730 | 167015 | 0.99 | 1.44E-01 | transcription_start_site | - | 167194 | 167194 | 321   | 30181 | AN7925 |
| 2919 | CONTIG135 | 166730 | 167015 | 0.99 | 1.44E-01 | transcription_start_site | - | 167297 | 167297 | 424   | 30180 | AN7925 |
| 2919 | CONTIG135 | 166730 | 167015 | 0.99 | 1.44E-01 | transcription_start_site | + | 169470 | 169470 | -2597 | 30184 | AN7927 |
| 2919 | CONTIG135 | 166730 | 167015 | 0.99 | 1.44E-01 | transcription_start_site | + | 169801 | 169801 | -2928 | 30185 | AN7927 |
| 2919 | CONTIG135 | 166730 | 167015 | 0.99 | 1.44E-01 | transcription_start_site | + | 170311 | 170311 | -3438 | 30186 | AN7927 |
| 2577 | CONTIG135 | 174451 | 174725 | 1.17 | 6.84E-02 | transcription_start_site | - | 174822 | 174822 | 234   | 30188 | AN7928 |
| 2577 | CONTIG135 | 174451 | 174725 | 1.17 | 6.84E-02 | transcription_start_site | - | 175203 | 175203 | 615   | 30187 | AN7928 |
| 2577 | CONTIG135 | 174451 | 174725 | 1.17 | 6.84E-02 | transcription_start_site | - | 172813 | 172813 | -1775 | 30189 | AN7928 |
| 2577 | CONTIG135 | 174451 | 174725 | 1.17 | 6.84E-02 | transcription_start_site | - | 172503 | 172503 | -2085 | 30190 | AN7928 |
| 2577 | CONTIG135 | 174451 | 174725 | 1.17 | 6.84E-02 | transcription_start_site | - | 171871 | 171871 | -2717 | 30191 | AN7928 |
| 2577 | CONTIG135 | 174451 | 174725 | 1.17 | 6.84E-02 | transcription_start_site | - | 171320 | 171320 | -3268 | 30192 | AN7928 |
| 2577 | CONTIG135 | 174451 | 174725 | 1.17 | 6.84E-02 | transcription_start_site | + | 175563 | 175563 | -975  | 30193 | AN7929 |
| 2577 | CONTIG135 | 174451 | 174725 | 1.17 | 6.84E-02 | transcription_start_site | + | 176076 | 176076 | -1488 | 30194 | AN7929 |
| 2920 | CONTIG135 | 183696 | 184025 | 0.99 | 1.44E-01 | transcription_start_site | - | 183346 | 183346 | -514  | 30196 | AN7932 |
| 2920 | CONTIG135 | 183696 | 184025 | 0.99 | 1.44E-01 | transcription_start_site | - | 183056 | 183056 | -804  | 30197 | AN7932 |
| 2920 | CONTIG135 | 183696 | 184025 | 0.99 | 1.44E-01 | transcription_start_site | - | 182456 | 182456 | -1404 | 30198 | AN7932 |
| 2920 | CONTIG135 | 183696 | 184025 | 0.99 | 1.44E-01 | transcription_start_site | - | 181801 | 181801 | -2059 | 30199 | AN7932 |
| 2920 | CONTIG135 | 183696 | 184025 | 0.99 | 1.44E-01 | transcription_start_site | + | 183917 | 183917 | -56   | 30200 | AN7933 |
| 2920 | CONTIG135 | 183696 | 184025 | 0.99 | 1.44E-01 | transcription_start_site | + | 184920 | 184920 | -1059 | 30201 | AN7933 |
| 2920 | CONTIG135 | 183696 | 184025 | 0.99 | 1.44E-01 | transcription_start_site | + | 186844 | 186844 | -2983 | 30207 | AN7935 |
| 2920 | CONTIG135 | 183696 | 184025 | 0.99 | 1.44E-01 | transcription_start_site | + | 187042 | 187042 | -3181 | 30208 | AN7935 |
| 2920 | CONTIG135 | 183696 | 184025 | 0.99 | 1.44E-01 | transcription_start_site | + | 187313 | 187313 | -3452 | 30209 | AN7935 |
| 2920 | CONTIG135 | 183696 | 184025 | 0.99 | 1.44E-01 | transcription_start_site | + | 187717 | 187717 | -3856 | 30210 | AN7935 |
| 2920 | CONTIG135 | 183696 | 184025 | 0.99 | 1.44E-01 | transcription_start_site | + | 188721 | 188721 | -4860 | 30211 | AN7936 |
| 3001 | CONTIG135 | 198083 | 198352 | 0.92 | 1.93E-01 | transcription_start_site | - | 195981 | 195981 | -2236 | 30216 | AN7938 |
| 3001 | CONTIG135 | 198083 | 198352 | 0.92 | 1.93E-01 | transcription_start_site | - | 195483 | 195483 | -2734 | 30217 | AN7938 |
| 3001 | CONTIG135 | 198083 | 198352 | 0.92 | 1.93E-01 | transcription_start_site | - | 195229 | 195229 | -2988 | 30218 | AN7938 |
| 3001 | CONTIG135 | 198083 | 198352 | 0.92 | 1.93E-01 | transcription_start_site | - | 194411 | 194411 | -3806 | 30219 | AN7938 |
| 3001 | CONTIG135 | 198083 | 198352 | 0.92 | 1.93E-01 | transcription_start_site | - | 198487 | 198487 | 269   | 30222 | AN7939 |
| 3001 | CONTIG135 | 198083 | 198352 | 0.92 | 1.93E-01 | transcription_start_site | - | 198726 | 198726 | 508   | 30221 | AN7939 |
| 3001 | CONTIG135 | 198083 | 198352 | 0.92 | 1.93E-01 | transcription_start_site | - | 198809 | 198809 | 591   | 30220 | AN7939 |
| 3002 | CONTIG135 | 205370 | 205779 | 0.92 | 1.93E-01 | transcription_start_site | - | 201573 | 201573 | -4001 | 30223 | AN7940 |
| 3002 | CONTIG135 | 205370 | 205779 | 0.92 | 1.93E-01 | transcription_start_site | - | 201286 | 201286 | -4288 | 30224 | AN7940 |
| 3002 | CONTIG135 | 205370 | 205779 | 0.92 | 1.93E-01 | transcription_start_site | - | 201050 | 201050 | -4524 | 30225 | AN7940 |
| 3002 | CONTIG135 | 205370 | 205779 | 0.92 | 1.93E-01 | transcription_start_site | - | 200606 | 200606 | -4968 | 30226 | AN7940 |



|      |           |        |        |      |          |                          |   |        |        |       |       |        |
|------|-----------|--------|--------|------|----------|--------------------------|---|--------|--------|-------|-------|--------|
| 2865 | CONTIG135 | 207695 | 207969 | 1.03 | 1.25E-01 | transcription_start_site | - | 206303 | 206303 | -1529 | 30229 | AN7942 |
| 2865 | CONTIG135 | 207695 | 207969 | 1.03 | 1.25E-01 | transcription_start_site | - | 206008 | 206008 | -1824 | 30230 | AN7942 |
| 3002 | CONTIG135 | 205370 | 205779 | 0.92 | 1.93E-01 | transcription_start_site | - | 206008 | 206008 | 433   | 30230 | AN7942 |
| 3002 | CONTIG135 | 205370 | 205779 | 0.92 | 1.93E-01 | transcription_start_site | - | 206303 | 206303 | 728   | 30229 | AN7942 |
| 2865 | CONTIG135 | 207695 | 207969 | 1.03 | 1.25E-01 | transcription_start_site | - | 208399 | 208399 | 567   | 30232 | AN7943 |
| 2865 | CONTIG135 | 207695 | 207969 | 1.03 | 1.25E-01 | transcription_start_site | - | 208620 | 208620 | 788   | 30231 | AN7943 |
| 2865 | CONTIG135 | 207695 | 207969 | 1.03 | 1.25E-01 | transcription_start_site | + | 212251 | 212251 | -4419 | 30233 | AN7944 |
| 2865 | CONTIG135 | 207695 | 207969 | 1.03 | 1.25E-01 | transcription_start_site | + | 212949 | 212949 | -5117 | 30234 | AN7944 |
| 876  | CONTIG135 | 214290 | 214629 | 2.02 | 1.01E-03 | transcription_start_site | + | 214600 | 214600 | -140  | 30235 | AN7945 |
| 185  | CONTIG135 | 229591 | 229939 | 2.97 | 0.00E+00 | transcription_start_site | - | 227364 | 227364 | -2401 | 30247 | AN7949 |
| 185  | CONTIG135 | 229591 | 229939 | 2.97 | 0.00E+00 | transcription_start_site | - | 225021 | 225021 | -4744 | 30248 | AN7949 |
| 2345 | CONTIG135 | 228466 | 229100 | 1.25 | 3.33E-02 | transcription_start_site | - | 227364 | 227364 | -1419 | 30247 | AN7949 |
| 2345 | CONTIG135 | 228466 | 229100 | 1.25 | 3.33E-02 | transcription_start_site | - | 225021 | 225021 | -3762 | 30248 | AN7949 |
| 185  | CONTIG135 | 229591 | 229939 | 2.97 | 0.00E+00 | transcription_start_site | - | 229421 | 229421 | -344  | 30249 | AN7950 |
| 2345 | CONTIG135 | 228466 | 229100 | 1.25 | 3.33E-02 | transcription_start_site | - | 229421 | 229421 | 638   | 30249 | AN7950 |
| 185  | CONTIG135 | 229591 | 229939 | 2.97 | 0.00E+00 | transcription_start_site | + | 230909 | 230909 | -1144 | 30250 | AN7951 |
| 185  | CONTIG135 | 229591 | 229939 | 2.97 | 0.00E+00 | transcription_start_site | + | 231102 | 231102 | -1337 | 30251 | AN7951 |
| 185  | CONTIG135 | 229591 | 229939 | 2.97 | 0.00E+00 | transcription_start_site | + | 232377 | 232377 | -2612 | 30252 | AN7951 |
| 185  | CONTIG135 | 229591 | 229939 | 2.97 | 0.00E+00 | transcription_start_site | + | 232563 | 232563 | -2798 | 30253 | AN7951 |
| 2345 | CONTIG135 | 228466 | 229100 | 1.25 | 3.33E-02 | transcription_start_site | + | 230909 | 230909 | -2126 | 30250 | AN7951 |
| 2345 | CONTIG135 | 228466 | 229100 | 1.25 | 3.33E-02 | transcription_start_site | + | 231102 | 231102 | -2319 | 30251 | AN7951 |
| 2345 | CONTIG135 | 228466 | 229100 | 1.25 | 3.33E-02 | transcription_start_site | + | 232377 | 232377 | -3594 | 30252 | AN7951 |
| 2345 | CONTIG135 | 228466 | 229100 | 1.25 | 3.33E-02 | transcription_start_site | + | 232563 | 232563 | -3780 | 30253 | AN7951 |
| 2462 | CONTIG135 | 279768 | 280412 | 1.21 | 3.99E-02 | transcription_start_site | - | 280103 | 280103 | 13    | 30317 | AN7971 |
| 2462 | CONTIG135 | 279768 | 280412 | 1.21 | 3.99E-02 | transcription_start_site | - | 280240 | 280240 | 150   | 30316 | AN7971 |
| 2462 | CONTIG135 | 279768 | 280412 | 1.21 | 3.99E-02 | transcription_start_site | - | 279479 | 279479 | -611  | 30318 | AN7971 |
| 2462 | CONTIG135 | 279768 | 280412 | 1.21 | 3.99E-02 | transcription_start_site | - | 279310 | 279310 | -780  | 30319 | AN7971 |
| 2462 | CONTIG135 | 279768 | 280412 | 1.21 | 3.99E-02 | transcription_start_site | - | 278467 | 278467 | -1623 | 30320 | AN7971 |
| 2462 | CONTIG135 | 279768 | 280412 | 1.21 | 3.99E-02 | transcription_start_site | + | 280682 | 280682 | -592  | 30321 | AN7972 |
| 2462 | CONTIG135 | 279768 | 280412 | 1.21 | 3.99E-02 | transcription_start_site | + | 280961 | 280961 | -871  | 30322 | AN7972 |
| 2462 | CONTIG135 | 279768 | 280412 | 1.21 | 3.99E-02 | transcription_start_site | + | 281389 | 281389 | -1299 | 30323 | AN7972 |
| 2462 | CONTIG135 | 279768 | 280412 | 1.21 | 3.99E-02 | transcription_start_site | + | 281519 | 281519 | -1429 | 30324 | AN7972 |
| 2462 | CONTIG135 | 279768 | 280412 | 1.21 | 3.99E-02 | transcription_start_site | + | 282430 | 282430 | -2340 | 30325 | AN7972 |
| 2921 | CONTIG135 | 290858 | 291367 | 0.99 | 1.44E-01 | transcription_start_site | - | 287828 | 287828 | -3284 | 30326 | AN7973 |
| 2921 | CONTIG135 | 290858 | 291367 | 0.99 | 1.44E-01 | transcription_start_site | - | 287643 | 287643 | -3469 | 30327 | AN7973 |
| 2921 | CONTIG135 | 290858 | 291367 | 0.99 | 1.44E-01 | transcription_start_site | - | 287452 | 287452 | -3660 | 30328 | AN7973 |
| 2921 | CONTIG135 | 290858 | 291367 | 0.99 | 1.44E-01 | transcription_start_site | - | 288816 | 288816 | -2296 | 30329 | AN7974 |
| 2921 | CONTIG135 | 290858 | 291367 | 0.99 | 1.44E-01 | transcription_start_site | - | 288775 | 288775 | -2337 | 30330 | AN7974 |
| 2921 | CONTIG135 | 290858 | 291367 | 0.99 | 1.44E-01 | transcription_start_site | - | 288404 | 288404 | -2708 | 30331 | AN7974 |
| 2921 | CONTIG135 | 290858 | 291367 | 0.99 | 1.44E-01 | transcription_start_site | + | 291789 | 291789 | -676  | 30332 | AN7975 |
| 2802 | CONTIG136 | 16652  | 17166  | 1.06 | 3.70E-02 | transcription_start_site | - | 11907  | 11907  | -5002 | 30361 | AN7982 |
| 2802 | CONTIG136 | 16652  | 17166  | 1.06 | 3.70E-02 | transcription_start_site | + | 17193  | 17193  | -284  | 30373 | AN7984 |
| 2802 | CONTIG136 | 16652  | 17166  | 1.06 | 3.70E-02 | transcription_start_site | + | 17495  | 17495  | -586  | 30374 | AN7984 |
| 2802 | CONTIG136 | 16652  | 17166  | 1.06 | 3.70E-02 | transcription_start_site | + | 15984  | 15984  | 925   | 30372 | AN7984 |
| 2802 | CONTIG136 | 16652  | 17166  | 1.06 | 3.70E-02 | transcription_start_site | + | 15721  | 15721  | 1188  | 30371 | AN7984 |
| 2802 | CONTIG136 | 16652  | 17166  | 1.06 | 3.70E-02 | transcription_start_site | - | 17939  | 17939  | 1030  | 30376 | AN7985 |
| 2802 | CONTIG136 | 16652  | 17166  | 1.06 | 3.70E-02 | transcription_start_site | + | 19856  | 19856  | -2947 | 30377 | AN7986 |
| 2802 | CONTIG136 | 16652  | 17166  | 1.06 | 3.70E-02 | transcription_start_site | + | 21033  | 21033  | -4124 | 30378 | AN7986 |
| 2802 | CONTIG136 | 16652  | 17166  | 1.06 | 3.70E-02 | transcription_start_site | + | 21572  | 21572  | -4663 | 30379 | AN7986 |
| 2802 | CONTIG136 | 16652  | 17166  | 1.06 | 3.70E-02 | transcription_start_site | + | 21706  | 21706  | -4797 | 30380 | AN7986 |
| 2802 | CONTIG136 | 16652  | 17166  | 1.06 | 3.70E-02 | transcription_start_site | + | 21915  | 21915  | -5006 | 30381 | AN7986 |
| 866  | CONTIG137 | 5551   | 5840   | 2.03 | 3.03E-03 | transcription_start_site | - | 5553   | 5553   | -142  | 30386 | AN7988 |
| 866  | CONTIG137 | 5551   | 5840   | 2.03 | 3.03E-03 | transcription_start_site | - | 5330   | 5330   | -365  | 30387 | AN7988 |
| 1419 | CONTIG137 | 7801   | 8102   | 1.62 | 1.84E-02 | transcription_start_site | - | 5553   | 5553   | -2398 | 30386 | AN7988 |
| 1419 | CONTIG137 | 7801   | 8102   | 1.62 | 1.84E-02 | transcription_start_site | - | 5330   | 5330   | -2621 | 30387 | AN7988 |
| 2662 | CONTIG137 | 4801   | 5150   | 1.14 | 1.25E-01 | transcription_start_site | - | 5330   | 5330   | 354   | 30387 | AN7988 |
| 2662 | CONTIG137 | 4801   | 5150   | 1.14 | 1.25E-01 | transcription_start_site | - | 5553   | 5553   | 577   | 30386 | AN7988 |

|      |           |       |       |      |          |                          |   |       |       |       |       |        |
|------|-----------|-------|-------|------|----------|--------------------------|---|-------|-------|-------|-------|--------|
| 866  | CONTIG137 | 5551  | 5840  | 2.03 | 3.03E-03 | transcription_start_site | - | 6175  | 6175  | 479   | 30392 | AN7989 |
| 866  | CONTIG137 | 5551  | 5840  | 2.03 | 3.03E-03 | transcription_start_site | - | 6775  | 6775  | 1079  | 30391 | AN7989 |
| 1419 | CONTIG137 | 7801  | 8102  | 1.62 | 1.84E-02 | transcription_start_site | - | 7176  | 7176  | -775  | 30388 | AN7989 |
| 1419 | CONTIG137 | 7801  | 8102  | 1.62 | 1.84E-02 | transcription_start_site | - | 7068  | 7068  | -883  | 30389 | AN7989 |
| 1419 | CONTIG137 | 7801  | 8102  | 1.62 | 1.84E-02 | transcription_start_site | - | 6975  | 6975  | -976  | 30390 | AN7989 |
| 1419 | CONTIG137 | 7801  | 8102  | 1.62 | 1.84E-02 | transcription_start_site | - | 6775  | 6775  | -1176 | 30391 | AN7989 |
| 1419 | CONTIG137 | 7801  | 8102  | 1.62 | 1.84E-02 | transcription_start_site | - | 6175  | 6175  | -1776 | 30392 | AN7989 |
| 2077 | CONTIG137 | 11871 | 12429 | 1.34 | 5.88E-02 | transcription_start_site | - | 7176  | 7176  | -4974 | 30388 | AN7989 |
| 2077 | CONTIG137 | 11871 | 12429 | 1.34 | 5.88E-02 | transcription_start_site | - | 7068  | 7068  | -5082 | 30389 | AN7989 |
| 2077 | CONTIG137 | 11871 | 12429 | 1.34 | 5.88E-02 | transcription_start_site | - | 6975  | 6975  | -5175 | 30390 | AN7989 |
| 1419 | CONTIG137 | 7801  | 8102  | 1.62 | 1.84E-02 | transcription_start_site | - | 8005  | 8005  | 53    | 30393 | AN7990 |
| 1419 | CONTIG137 | 7801  | 8102  | 1.62 | 1.84E-02 | transcription_start_site | - | 7787  | 7787  | -164  | 30394 | AN7990 |
| 1419 | CONTIG137 | 7801  | 8102  | 1.62 | 1.84E-02 | transcription_start_site | - | 7489  | 7489  | -462  | 30395 | AN7990 |
| 2077 | CONTIG137 | 11871 | 12429 | 1.34 | 5.88E-02 | transcription_start_site | - | 8005  | 8005  | -4145 | 30393 | AN7990 |
| 2077 | CONTIG137 | 11871 | 12429 | 1.34 | 5.88E-02 | transcription_start_site | - | 7787  | 7787  | -4363 | 30394 | AN7990 |
| 2077 | CONTIG137 | 11871 | 12429 | 1.34 | 5.88E-02 | transcription_start_site | - | 7489  | 7489  | -4661 | 30395 | AN7990 |
| 866  | CONTIG137 | 5551  | 5840  | 2.03 | 3.03E-03 | transcription_start_site | + | 9578  | 9578  | -3882 | 30396 | AN7991 |
| 866  | CONTIG137 | 5551  | 5840  | 2.03 | 3.03E-03 | transcription_start_site | + | 9856  | 9856  | -4160 | 30397 | AN7991 |
| 866  | CONTIG137 | 5551  | 5840  | 2.03 | 3.03E-03 | transcription_start_site | + | 10100 | 10100 | -4404 | 30398 | AN7991 |
| 1419 | CONTIG137 | 7801  | 8102  | 1.62 | 1.84E-02 | transcription_start_site | + | 9578  | 9578  | -1626 | 30396 | AN7991 |
| 1419 | CONTIG137 | 7801  | 8102  | 1.62 | 1.84E-02 | transcription_start_site | + | 9856  | 9856  | -1904 | 30397 | AN7991 |
| 1419 | CONTIG137 | 7801  | 8102  | 1.62 | 1.84E-02 | transcription_start_site | + | 10100 | 10100 | -2148 | 30398 | AN7991 |
| 2662 | CONTIG137 | 4801  | 5150  | 1.14 | 1.25E-01 | transcription_start_site | + | 9578  | 9578  | -4602 | 30396 | AN7991 |
| 2662 | CONTIG137 | 4801  | 5150  | 1.14 | 1.25E-01 | transcription_start_site | + | 9856  | 9856  | -4880 | 30397 | AN7991 |
| 2662 | CONTIG137 | 4801  | 5150  | 1.14 | 1.25E-01 | transcription_start_site | + | 10100 | 10100 | -5124 | 30398 | AN7991 |
| 1419 | CONTIG137 | 7801  | 8102  | 1.62 | 1.84E-02 | transcription_start_site | + | 12092 | 12092 | -4140 | 30399 | AN7992 |
| 2077 | CONTIG137 | 11871 | 12429 | 1.34 | 5.88E-02 | transcription_start_site | + | 12092 | 12092 | 58    | 30399 | AN7992 |
| 2077 | CONTIG137 | 11871 | 12429 | 1.34 | 5.88E-02 | transcription_start_site | - | 12868 | 12868 | 718   | 30402 | AN7993 |
| 2321 | CONTIG137 | 19811 | 20080 | 1.26 | 8.01E-02 | transcription_start_site | - | 15957 | 15957 | -3988 | 30400 | AN7993 |
| 2321 | CONTIG137 | 19811 | 20080 | 1.26 | 8.01E-02 | transcription_start_site | - | 15696 | 15696 | -4249 | 30401 | AN7993 |
| 2077 | CONTIG137 | 11871 | 12429 | 1.34 | 5.88E-02 | transcription_start_site | + | 16448 | 16448 | -4298 | 30403 | AN7994 |
| 2077 | CONTIG137 | 11871 | 12429 | 1.34 | 5.88E-02 | transcription_start_site | + | 16634 | 16634 | -4484 | 30404 | AN7994 |
| 2077 | CONTIG137 | 11871 | 12429 | 1.34 | 5.88E-02 | transcription_start_site | + | 16817 | 16817 | -4667 | 30405 | AN7994 |
| 2321 | CONTIG137 | 19811 | 20080 | 1.26 | 8.01E-02 | transcription_start_site | + | 19343 | 19343 | 602   | 30407 | AN7995 |
| 2321 | CONTIG137 | 19811 | 20080 | 1.26 | 8.01E-02 | transcription_start_site | + | 22371 | 22371 | -2425 | 30408 | AN7996 |
| 2321 | CONTIG137 | 19811 | 20080 | 1.26 | 8.01E-02 | transcription_start_site | + | 22548 | 22548 | -2602 | 30409 | AN7996 |
| 285  | CONTIG138 | 13671 | 14080 | 2.79 | 9.51E-04 | transcription_start_site | - | 11514 | 11514 | -2361 | 30425 | AN8001 |
| 285  | CONTIG138 | 13671 | 14080 | 2.79 | 9.51E-04 | transcription_start_site | - | 11446 | 11446 | -2429 | 30426 | AN8001 |
| 618  | CONTIG138 | 14416 | 14988 | 2.29 | 6.61E-03 | transcription_start_site | - | 11514 | 11514 | -3188 | 30425 | AN8001 |
| 618  | CONTIG138 | 14416 | 14988 | 2.29 | 6.61E-03 | transcription_start_site | - | 11446 | 11446 | -3256 | 30426 | AN8001 |
| 285  | CONTIG138 | 13671 | 14080 | 2.79 | 9.51E-04 | transcription_start_site | + | 15372 | 15372 | -1496 | 30429 | AN8003 |
| 618  | CONTIG138 | 14416 | 14988 | 2.29 | 6.61E-03 | transcription_start_site | + | 15372 | 15372 | -670  | 30429 | AN8003 |
| 286  | CONTIG138 | 19371 | 19653 | 2.79 | 9.51E-04 | transcription_start_site | + | 19645 | 19645 | -133  | 30430 | AN8004 |
| 618  | CONTIG138 | 14416 | 14988 | 2.29 | 6.61E-03 | transcription_start_site | + | 19645 | 19645 | -4943 | 30430 | AN8004 |
| 1385 | CONTIG138 | 20346 | 20615 | 1.64 | 5.88E-02 | transcription_start_site | + | 19645 | 19645 | 835   | 30430 | AN8004 |
| 1792 | CONTIG139 | 15619 | 16038 | 1.46 | 4.36E-02 | transcription_start_site | - | 10732 | 10732 | -5096 | 30457 | AN8015 |
| 454  | CONTIG139 | 17109 | 17616 | 2.51 | 0.00E+00 | transcription_start_site | - | 16411 | 16411 | -951  | 30464 | AN8017 |
| 454  | CONTIG139 | 17109 | 17616 | 2.51 | 0.00E+00 | transcription_start_site | - | 16002 | 16002 | -1360 | 30465 | AN8017 |
| 454  | CONTIG139 | 17109 | 17616 | 2.51 | 0.00E+00 | transcription_start_site | - | 15924 | 15924 | -1438 | 30466 | AN8017 |
| 454  | CONTIG139 | 17109 | 17616 | 2.51 | 0.00E+00 | transcription_start_site | - | 14901 | 14901 | -2461 | 30467 | AN8017 |
| 454  | CONTIG139 | 17109 | 17616 | 2.51 | 0.00E+00 | transcription_start_site | - | 14643 | 14643 | -2719 | 30468 | AN8017 |
| 454  | CONTIG139 | 17109 | 17616 | 2.51 | 0.00E+00 | transcription_start_site | - | 14297 | 14297 | -3065 | 30469 | AN8017 |
| 454  | CONTIG139 | 17109 | 17616 | 2.51 | 0.00E+00 | transcription_start_site | - | 13739 | 13739 | -3623 | 30470 | AN8017 |
| 454  | CONTIG139 | 17109 | 17616 | 2.51 | 0.00E+00 | transcription_start_site | - | 13566 | 13566 | -3796 | 30471 | AN8017 |
| 1792 | CONTIG139 | 15619 | 16038 | 1.46 | 4.36E-02 | transcription_start_site | - | 15924 | 15924 | 95    | 30466 | AN8017 |
| 1792 | CONTIG139 | 15619 | 16038 | 1.46 | 4.36E-02 | transcription_start_site | - | 16002 | 16002 | 173   | 30465 | AN8017 |
| 1792 | CONTIG139 | 15619 | 16038 | 1.46 | 4.36E-02 | transcription_start_site | - | 16411 | 16411 | 582   | 30464 | AN8017 |

|      |           |       |       |      |          |                          |   |       |       |       |       |        |
|------|-----------|-------|-------|------|----------|--------------------------|---|-------|-------|-------|-------|--------|
| 1792 | CONTIG139 | 15619 | 16038 | 1.46 | 4.36E-02 | transcription_start_site | - | 14901 | 14901 | -927  | 30467 | AN8017 |
| 1792 | CONTIG139 | 15619 | 16038 | 1.46 | 4.36E-02 | transcription_start_site | - | 14643 | 14643 | -1185 | 30468 | AN8017 |
| 1792 | CONTIG139 | 15619 | 16038 | 1.46 | 4.36E-02 | transcription_start_site | - | 14297 | 14297 | -1531 | 30469 | AN8017 |
| 1792 | CONTIG139 | 15619 | 16038 | 1.46 | 4.36E-02 | transcription_start_site | - | 13739 | 13739 | -2089 | 30470 | AN8017 |
| 1792 | CONTIG139 | 15619 | 16038 | 1.46 | 4.36E-02 | transcription_start_site | - | 13566 | 13566 | -2262 | 30471 | AN8017 |
| 454  | CONTIG139 | 17109 | 17616 | 2.51 | 0.00E+00 | transcription_start_site | - | 18253 | 18253 | 890   | 30475 | AN8018 |
| 454  | CONTIG139 | 17109 | 17616 | 2.51 | 0.00E+00 | transcription_start_site | - | 18503 | 18503 | 1140  | 30474 | AN8018 |
| 454  | CONTIG139 | 17109 | 17616 | 2.51 | 0.00E+00 | transcription_start_site | + | 21083 | 21083 | -3720 | 30476 | AN8019 |
| 454  | CONTIG139 | 17109 | 17616 | 2.51 | 0.00E+00 | transcription_start_site | + | 22012 | 22012 | -4649 | 30477 | AN8019 |
| 2833 | CONTIG139 | 27452 | 27731 | 1.05 | 1.93E-01 | transcription_start_site | - | 26599 | 26599 | -992  | 30479 | AN8020 |
| 2833 | CONTIG139 | 27452 | 27731 | 1.05 | 1.93E-01 | transcription_start_site | - | 26197 | 26197 | -1394 | 30480 | AN8020 |
| 2833 | CONTIG139 | 27452 | 27731 | 1.05 | 1.93E-01 | transcription_start_site | - | 26080 | 26080 | -1511 | 30481 | AN8020 |
| 2833 | CONTIG139 | 27452 | 27731 | 1.05 | 1.93E-01 | transcription_start_site | - | 25339 | 25339 | -2252 | 30482 | AN8020 |
| 2833 | CONTIG139 | 27452 | 27731 | 1.05 | 1.93E-01 | transcription_start_site | + | 27729 | 27729 | -137  | 30483 | AN8021 |
| 2833 | CONTIG139 | 27452 | 27731 | 1.05 | 1.93E-01 | transcription_start_site | + | 27954 | 27954 | -362  | 30484 | AN8021 |
| 2833 | CONTIG139 | 27452 | 27731 | 1.05 | 1.93E-01 | transcription_start_site | + | 28092 | 28092 | -500  | 30485 | AN8021 |
| 2833 | CONTIG139 | 27452 | 27731 | 1.05 | 1.93E-01 | transcription_start_site | + | 28810 | 28810 | -1218 | 30486 | AN8021 |
| 2833 | CONTIG139 | 27452 | 27731 | 1.05 | 1.93E-01 | transcription_start_site | + | 29202 | 29202 | -1610 | 30487 | AN8021 |
| 2833 | CONTIG139 | 27452 | 27731 | 1.05 | 1.93E-01 | transcription_start_site | + | 29548 | 29548 | -1956 | 30488 | AN8022 |
| 2833 | CONTIG139 | 27452 | 27731 | 1.05 | 1.93E-01 | transcription_start_site | + | 29755 | 29755 | -2163 | 30489 | AN8022 |
| 2833 | CONTIG139 | 27452 | 27731 | 1.05 | 1.93E-01 | transcription_start_site | + | 30293 | 30293 | -2701 | 30490 | AN8023 |
| 2833 | CONTIG139 | 27452 | 27731 | 1.05 | 1.93E-01 | transcription_start_site | + | 30385 | 30385 | -2793 | 30491 | AN8023 |
| 2833 | CONTIG139 | 27452 | 27731 | 1.05 | 1.93E-01 | transcription_start_site | + | 30533 | 30533 | -2941 | 30492 | AN8023 |
| 2833 | CONTIG139 | 27452 | 27731 | 1.05 | 1.93E-01 | transcription_start_site | + | 30704 | 30704 | -3112 | 30493 | AN8023 |
| 2833 | CONTIG139 | 27452 | 27731 | 1.05 | 1.93E-01 | transcription_start_site | + | 31493 | 31493 | -3901 | 30494 | AN8023 |
| 2833 | CONTIG139 | 27452 | 27731 | 1.05 | 1.93E-01 | transcription_start_site | + | 32180 | 32180 | -4588 | 30495 | AN8023 |
| 2833 | CONTIG139 | 27452 | 27731 | 1.05 | 1.93E-01 | transcription_start_site | + | 32491 | 32491 | -4899 | 30496 | AN8023 |
| 2833 | CONTIG139 | 27452 | 27731 | 1.05 | 1.93E-01 | transcription_start_site | + | 32622 | 32622 | -5030 | 30497 | AN8023 |
| 2355 | CONTIG139 | 43892 | 44541 | 1.25 | 9.24E-02 | transcription_start_site | - | 39026 | 39026 | -5190 | 30504 | AN8026 |
| 2355 | CONTIG139 | 43892 | 44541 | 1.25 | 9.24E-02 | transcription_start_site | - | 42543 | 42543 | -1673 | 30509 | AN8027 |
| 2355 | CONTIG139 | 43892 | 44541 | 1.25 | 9.24E-02 | transcription_start_site | - | 42016 | 42016 | -2200 | 30510 | AN8027 |
| 2355 | CONTIG139 | 43892 | 44541 | 1.25 | 9.24E-02 | transcription_start_site | - | 41737 | 41737 | -2479 | 30511 | AN8027 |
| 2356 | CONTIG139 | 45542 | 45816 | 1.25 | 9.24E-02 | transcription_start_site | - | 42543 | 42543 | -3136 | 30509 | AN8027 |
| 2356 | CONTIG139 | 45542 | 45816 | 1.25 | 9.24E-02 | transcription_start_site | - | 42016 | 42016 | -3663 | 30510 | AN8027 |
| 2356 | CONTIG139 | 45542 | 45816 | 1.25 | 9.24E-02 | transcription_start_site | - | 41737 | 41737 | -3942 | 30511 | AN8027 |
| 2355 | CONTIG139 | 43892 | 44541 | 1.25 | 9.24E-02 | transcription_start_site | + | 44097 | 44097 | 119   | 30513 | AN8028 |
| 2355 | CONTIG139 | 43892 | 44541 | 1.25 | 9.24E-02 | transcription_start_site | + | 43872 | 43872 | 344   | 30512 | AN8028 |
| 2355 | CONTIG139 | 43892 | 44541 | 1.25 | 9.24E-02 | transcription_start_site | + | 46375 | 46375 | -2158 | 30514 | AN8029 |
| 2356 | CONTIG139 | 45542 | 45816 | 1.25 | 9.24E-02 | transcription_start_site | + | 46375 | 46375 | -696  | 30514 | AN8029 |
| 2355 | CONTIG139 | 43892 | 44541 | 1.25 | 9.24E-02 | transcription_start_site | + | 49283 | 49283 | -5066 | 30515 | AN8030 |
| 2356 | CONTIG139 | 45542 | 45816 | 1.25 | 9.24E-02 | transcription_start_site | + | 49283 | 49283 | -3604 | 30515 | AN8030 |
| 2356 | CONTIG139 | 45542 | 45816 | 1.25 | 9.24E-02 | transcription_start_site | + | 49830 | 49830 | -4151 | 30516 | AN8030 |
| 2679 | CONTIG139 | 49954 | 50228 | 1.13 | 1.44E-01 | transcription_start_site | + | 49830 | 49830 | 261   | 30516 | AN8030 |
| 2679 | CONTIG139 | 49954 | 50228 | 1.13 | 1.44E-01 | transcription_start_site | + | 49283 | 49283 | 808   | 30515 | AN8030 |
| 326  | CONTIG139 | 59480 | 59834 | 2.72 | 0.00E+00 | transcription_start_site | - | 56562 | 56562 | -3095 | 30518 | AN8032 |
| 326  | CONTIG139 | 59480 | 59834 | 2.72 | 0.00E+00 | transcription_start_site | - | 56293 | 56293 | -3364 | 30519 | AN8032 |
| 326  | CONTIG139 | 59480 | 59834 | 2.72 | 0.00E+00 | transcription_start_site | - | 56211 | 56211 | -3446 | 30520 | AN8032 |
| 326  | CONTIG139 | 59480 | 59834 | 2.72 | 0.00E+00 | transcription_start_site | - | 55433 | 55433 | -4224 | 30521 | AN8032 |
| 429  | CONTIG139 | 61370 | 61639 | 2.55 | 2.39E-04 | transcription_start_site | - | 56562 | 56562 | -4942 | 30518 | AN8032 |
| 326  | CONTIG139 | 59480 | 59834 | 2.72 | 0.00E+00 | transcription_start_site | + | 62790 | 62790 | -3133 | 30522 | AN8034 |
| 326  | CONTIG139 | 59480 | 59834 | 2.72 | 0.00E+00 | transcription_start_site | + | 64059 | 64059 | -4402 | 30523 | AN8034 |
| 429  | CONTIG139 | 61370 | 61639 | 2.55 | 2.39E-04 | transcription_start_site | + | 62790 | 62790 | -1285 | 30522 | AN8034 |
| 429  | CONTIG139 | 61370 | 61639 | 2.55 | 2.39E-04 | transcription_start_site | + | 64059 | 64059 | -2554 | 30523 | AN8034 |
| 1196 | CONTIG139 | 62645 | 62975 | 1.76 | 1.30E-02 | transcription_start_site | + | 62790 | 62790 | 20    | 30522 | AN8034 |
| 1196 | CONTIG139 | 62645 | 62975 | 1.76 | 1.30E-02 | transcription_start_site | + | 64059 | 64059 | -1249 | 30523 | AN8034 |
| 2178 | CONTIG139 | 61820 | 62529 | 1.3  | 6.16E-02 | transcription_start_site | + | 62790 | 62790 | -615  | 30522 | AN8034 |
| 2178 | CONTIG139 | 61820 | 62529 | 1.3  | 6.16E-02 | transcription_start_site | + | 64059 | 64059 | -1884 | 30523 | AN8034 |

|      |           |        |        |      |          |                          |   |        |        |       |       |        |
|------|-----------|--------|--------|------|----------|--------------------------|---|--------|--------|-------|-------|--------|
| 2678 | CONTIG139 | 63676  | 64400  | 1.13 | 1.33E-01 | transcription_start_site | + | 64059  | 64059  | -21   | 30523 | AN8034 |
| 2678 | CONTIG139 | 63676  | 64400  | 1.13 | 1.33E-01 | transcription_start_site | + | 62790  | 62790  | 1248  | 30522 | AN8034 |
| 2179 | CONTIG139 | 70221  | 70639  | 1.3  | 6.16E-02 | transcription_start_site | - | 67909  | 67909  | -2521 | 30524 | AN8035 |
| 2179 | CONTIG139 | 70221  | 70639  | 1.3  | 6.16E-02 | transcription_start_site | - | 67385  | 67385  | -3045 | 30525 | AN8035 |
| 2357 | CONTIG139 | 67746  | 68000  | 1.25 | 9.24E-02 | transcription_start_site | - | 67909  | 67909  | 36    | 30524 | AN8035 |
| 2357 | CONTIG139 | 67746  | 68000  | 1.25 | 9.24E-02 | transcription_start_site | - | 67385  | 67385  | -488  | 30525 | AN8035 |
| 2179 | CONTIG139 | 70221  | 70639  | 1.3  | 6.16E-02 | transcription_start_site | - | 69831  | 69831  | -599  | 30526 | AN8036 |
| 2179 | CONTIG139 | 70221  | 70639  | 1.3  | 6.16E-02 | transcription_start_site | - | 69505  | 69505  | -925  | 30527 | AN8036 |
| 2179 | CONTIG139 | 70221  | 70639  | 1.3  | 6.16E-02 | transcription_start_site | + | 70758  | 70758  | -328  | 30528 | AN8037 |
| 2179 | CONTIG139 | 70221  | 70639  | 1.3  | 6.16E-02 | transcription_start_site | + | 70998  | 70998  | -568  | 30529 | AN8037 |
| 2179 | CONTIG139 | 70221  | 70639  | 1.3  | 6.16E-02 | transcription_start_site | + | 71094  | 71094  | -664  | 30530 | AN8037 |
| 2357 | CONTIG139 | 67746  | 68000  | 1.25 | 9.24E-02 | transcription_start_site | + | 70758  | 70758  | -2885 | 30528 | AN8037 |
| 2357 | CONTIG139 | 67746  | 68000  | 1.25 | 9.24E-02 | transcription_start_site | + | 70998  | 70998  | -3125 | 30529 | AN8037 |
| 2357 | CONTIG139 | 67746  | 68000  | 1.25 | 9.24E-02 | transcription_start_site | + | 71094  | 71094  | -3221 | 30530 | AN8037 |
| 327  | CONTIG139 | 83421  | 83695  | 2.72 | 0.00E+00 | transcription_start_site | - | 80597  | 80597  | -2961 | 30534 | AN8039 |
| 327  | CONTIG139 | 83421  | 83695  | 2.72 | 0.00E+00 | transcription_start_site | - | 80258  | 80258  | -3300 | 30535 | AN8039 |
| 327  | CONTIG139 | 83421  | 83695  | 2.72 | 0.00E+00 | transcription_start_site | - | 80125  | 80125  | -3433 | 30536 | AN8039 |
| 327  | CONTIG139 | 83421  | 83695  | 2.72 | 0.00E+00 | transcription_start_site | + | 84034  | 84034  | -476  | 30540 | AN8041 |
| 327  | CONTIG139 | 83421  | 83695  | 2.72 | 0.00E+00 | transcription_start_site | + | 84110  | 84110  | -552  | 30541 | AN8041 |
| 327  | CONTIG139 | 83421  | 83695  | 2.72 | 0.00E+00 | transcription_start_site | + | 84202  | 84202  | -644  | 30542 | AN8041 |
| 327  | CONTIG139 | 83421  | 83695  | 2.72 | 0.00E+00 | transcription_start_site | + | 84325  | 84325  | -767  | 30543 | AN8041 |
| 327  | CONTIG139 | 83421  | 83695  | 2.72 | 0.00E+00 | transcription_start_site | + | 84447  | 84447  | -889  | 30544 | AN8041 |
| 327  | CONTIG139 | 83421  | 83695  | 2.72 | 0.00E+00 | transcription_start_site | + | 85186  | 85186  | -1628 | 30545 | AN8041 |
| 327  | CONTIG139 | 83421  | 83695  | 2.72 | 0.00E+00 | transcription_start_site | + | 85409  | 85409  | -1851 | 30546 | AN8041 |
| 327  | CONTIG139 | 83421  | 83695  | 2.72 | 0.00E+00 | transcription_start_site | + | 86421  | 86421  | -2863 | 30547 | AN8042 |
| 327  | CONTIG139 | 83421  | 83695  | 2.72 | 0.00E+00 | transcription_start_site | + | 87101  | 87101  | -3543 | 30548 | AN8042 |
| 327  | CONTIG139 | 83421  | 83695  | 2.72 | 0.00E+00 | transcription_start_site | + | 87439  | 87439  | -3881 | 30549 | AN8042 |
| 327  | CONTIG139 | 83421  | 83695  | 2.72 | 0.00E+00 | transcription_start_site | + | 87507  | 87507  | -3949 | 30550 | AN8042 |
| 327  | CONTIG139 | 83421  | 83695  | 2.72 | 0.00E+00 | transcription_start_site | + | 87705  | 87705  | -4147 | 30551 | AN8042 |
| 327  | CONTIG139 | 83421  | 83695  | 2.72 | 0.00E+00 | transcription_start_site | + | 87869  | 87869  | -4311 | 30552 | AN8042 |
| 327  | CONTIG139 | 83421  | 83695  | 2.72 | 0.00E+00 | transcription_start_site | + | 88049  | 88049  | -4491 | 30553 | AN8042 |
| 327  | CONTIG139 | 83421  | 83695  | 2.72 | 0.00E+00 | transcription_start_site | + | 88309  | 88309  | -4751 | 30554 | AN8042 |
| 327  | CONTIG139 | 83421  | 83695  | 2.72 | 0.00E+00 | transcription_start_site | + | 88569  | 88569  | -5011 | 30555 | AN8042 |
| 327  | CONTIG139 | 83421  | 83695  | 2.72 | 0.00E+00 | transcription_start_site | + | 88683  | 88683  | -5125 | 30556 | AN8042 |
| 1265 | CONTIG139 | 108156 | 110155 | 1.71 | 3.83E-03 | transcription_start_site | - | 105045 | 105045 | -4110 | 30572 | AN8048 |
| 1265 | CONTIG139 | 108156 | 110155 | 1.71 | 3.83E-03 | transcription_start_site | - | 104916 | 104916 | -4239 | 30573 | AN8048 |
| 1265 | CONTIG139 | 108156 | 110155 | 1.71 | 3.83E-03 | transcription_start_site | - | 104491 | 104491 | -4664 | 30574 | AN8048 |
| 1265 | CONTIG139 | 108156 | 110155 | 1.71 | 3.83E-03 | transcription_start_site | - | 106959 | 106959 | -2196 | 30578 | AN8050 |
| 1265 | CONTIG139 | 108156 | 110155 | 1.71 | 3.83E-03 | transcription_start_site | - | 106588 | 106588 | -2567 | 30579 | AN8050 |
| 1265 | CONTIG139 | 108156 | 110155 | 1.71 | 3.83E-03 | transcription_start_site | + | 108992 | 108992 | 163   | 30580 | AN8051 |
| 1270 | CONTIG139 | 115131 | 115705 | 1.71 | 1.57E-02 | transcription_start_site | - | 111947 | 111947 | -3471 | 30581 | AN8052 |
| 1270 | CONTIG139 | 115131 | 115705 | 1.71 | 1.57E-02 | transcription_start_site | - | 111735 | 111735 | -3683 | 30582 | AN8052 |
| 1270 | CONTIG139 | 115131 | 115705 | 1.71 | 1.57E-02 | transcription_start_site | - | 111526 | 111526 | -3892 | 30583 | AN8052 |
| 1270 | CONTIG139 | 115131 | 115705 | 1.71 | 1.57E-02 | transcription_start_site | - | 111323 | 111323 | -4095 | 30584 | AN8052 |
| 1270 | CONTIG139 | 115131 | 115705 | 1.71 | 1.57E-02 | transcription_start_site | - | 116120 | 116120 | 702   | 30586 | AN8053 |
| 1270 | CONTIG139 | 115131 | 115705 | 1.71 | 1.57E-02 | transcription_start_site | - | 116224 | 116224 | 806   | 30585 | AN8053 |
| 1270 | CONTIG139 | 115131 | 115705 | 1.71 | 1.57E-02 | transcription_start_site | - | 113785 | 113785 | -1633 | 30587 | AN8053 |
| 1270 | CONTIG139 | 115131 | 115705 | 1.71 | 1.57E-02 | transcription_start_site | - | 113525 | 113525 | -1893 | 30588 | AN8053 |
| 1270 | CONTIG139 | 115131 | 115705 | 1.71 | 1.57E-02 | transcription_start_site | - | 113219 | 113219 | -2199 | 30589 | AN8053 |
| 1270 | CONTIG139 | 115131 | 115705 | 1.71 | 1.57E-02 | transcription_start_site | - | 112498 | 112498 | -2920 | 30590 | AN8053 |
| 2480 | CONTIG139 | 120536 | 121953 | 1.21 | 1.08E-01 | transcription_start_site | - | 116224 | 116224 | -5020 | 30585 | AN8053 |
| 2480 | CONTIG139 | 120536 | 121953 | 1.21 | 1.08E-01 | transcription_start_site | - | 116120 | 116120 | -5124 | 30586 | AN8053 |
| 2480 | CONTIG139 | 120536 | 121953 | 1.21 | 1.08E-01 | transcription_start_site | - | 118721 | 118721 | -2523 | 30591 | AN8054 |
| 2480 | CONTIG139 | 120536 | 121953 | 1.21 | 1.08E-01 | transcription_start_site | - | 118628 | 118628 | -2616 | 30592 | AN8054 |
| 2480 | CONTIG139 | 120536 | 121953 | 1.21 | 1.08E-01 | transcription_start_site | - | 118173 | 118173 | -3071 | 30593 | AN8054 |
| 2480 | CONTIG139 | 120536 | 121953 | 1.21 | 1.08E-01 | transcription_start_site | - | 121123 | 121123 | -121  | 30597 | AN8055 |
| 2480 | CONTIG139 | 120536 | 121953 | 1.21 | 1.08E-01 | transcription_start_site | - | 121884 | 121884 | 639   | 30596 | AN8055 |

|      |           |        |        |      |          |                          |   |        |        |       |       |        |
|------|-----------|--------|--------|------|----------|--------------------------|---|--------|--------|-------|-------|--------|
| 2480 | CONTIG139 | 120536 | 121953 | 1.21 | 1.08E-01 | transcription_start_site | - | 122061 | 122061 | 816   | 30595 | AN8055 |
| 2480 | CONTIG139 | 120536 | 121953 | 1.21 | 1.08E-01 | transcription_start_site | - | 122360 | 122360 | 1115  | 30594 | AN8055 |
| 2481 | CONTIG139 | 130730 | 131084 | 1.21 | 1.08E-01 | transcription_start_site | - | 127117 | 127117 | -3790 | 30598 | AN8056 |
| 2481 | CONTIG139 | 130730 | 131084 | 1.21 | 1.08E-01 | transcription_start_site | - | 130219 | 130219 | -688  | 30602 | AN8058 |
| 2481 | CONTIG139 | 130730 | 131084 | 1.21 | 1.08E-01 | transcription_start_site | - | 130159 | 130159 | -748  | 30603 | AN8058 |
| 2481 | CONTIG139 | 130730 | 131084 | 1.21 | 1.08E-01 | transcription_start_site | - | 129573 | 129573 | -1334 | 30604 | AN8058 |
| 2481 | CONTIG139 | 130730 | 131084 | 1.21 | 1.08E-01 | transcription_start_site | - | 131253 | 131253 | 346   | 30607 | AN8059 |
| 2481 | CONTIG139 | 130730 | 131084 | 1.21 | 1.08E-01 | transcription_start_site | - | 131413 | 131413 | 506   | 30606 | AN8059 |
| 2481 | CONTIG139 | 130730 | 131084 | 1.21 | 1.08E-01 | transcription_start_site | - | 131588 | 131588 | 681   | 30605 | AN8059 |
| 2834 | CONTIG139 | 142896 | 143385 | 1.05 | 1.93E-01 | transcription_start_site | - | 140524 | 140524 | -2616 | 30612 | AN8063 |
| 2834 | CONTIG139 | 142896 | 143385 | 1.05 | 1.93E-01 | transcription_start_site | - | 142710 | 142710 | -430  | 30613 | AN8064 |
| 2834 | CONTIG139 | 142896 | 143385 | 1.05 | 1.93E-01 | transcription_start_site | - | 142517 | 142517 | -623  | 30614 | AN8064 |
| 2834 | CONTIG139 | 142896 | 143385 | 1.05 | 1.93E-01 | transcription_start_site | - | 142380 | 142380 | -760  | 30615 | AN8064 |
| 2834 | CONTIG139 | 142896 | 143385 | 1.05 | 1.93E-01 | transcription_start_site | - | 142153 | 142153 | -987  | 30616 | AN8064 |
| 2834 | CONTIG139 | 142896 | 143385 | 1.05 | 1.93E-01 | transcription_start_site | - | 141711 | 141711 | -1429 | 30617 | AN8064 |
| 2834 | CONTIG139 | 142896 | 143385 | 1.05 | 1.93E-01 | transcription_start_site | + | 143096 | 143096 | 44    | 30619 | AN8065 |
| 2834 | CONTIG139 | 142896 | 143385 | 1.05 | 1.93E-01 | transcription_start_site | + | 143246 | 143246 | -105  | 30620 | AN8065 |
| 2834 | CONTIG139 | 142896 | 143385 | 1.05 | 1.93E-01 | transcription_start_site | + | 143024 | 143024 | 116   | 30618 | AN8065 |
| 2834 | CONTIG139 | 142896 | 143385 | 1.05 | 1.93E-01 | transcription_start_site | + | 143585 | 143585 | -444  | 30621 | AN8065 |
| 2834 | CONTIG139 | 142896 | 143385 | 1.05 | 1.93E-01 | transcription_start_site | + | 143753 | 143753 | -612  | 30622 | AN8065 |
| 2834 | CONTIG139 | 142896 | 143385 | 1.05 | 1.93E-01 | transcription_start_site | + | 143885 | 143885 | -744  | 30623 | AN8065 |
| 2834 | CONTIG139 | 142896 | 143385 | 1.05 | 1.93E-01 | transcription_start_site | + | 146697 | 146697 | -3556 | 30626 | AN8067 |
| 2834 | CONTIG139 | 142896 | 143385 | 1.05 | 1.93E-01 | transcription_start_site | + | 147407 | 147407 | -4266 | 30627 | AN8067 |
| 2834 | CONTIG139 | 142896 | 143385 | 1.05 | 1.93E-01 | transcription_start_site | + | 148314 | 148314 | -5173 | 30628 | AN8067 |
| 576  | CONTIG139 | 173780 | 174054 | 2.34 | 9.51E-04 | transcription_start_site | - | 172974 | 172974 | -943  | 30651 | AN8074 |
| 576  | CONTIG139 | 173780 | 174054 | 2.34 | 9.51E-04 | transcription_start_site | - | 172537 | 172537 | -1380 | 30652 | AN8074 |
| 576  | CONTIG139 | 173780 | 174054 | 2.34 | 9.51E-04 | transcription_start_site | - | 170389 | 170389 | -3528 | 30653 | AN8074 |
| 883  | CONTIG139 | 175665 | 176004 | 2.01 | 1.22E-03 | transcription_start_site | - | 172974 | 172974 | -2860 | 30651 | AN8074 |
| 883  | CONTIG139 | 175665 | 176004 | 2.01 | 1.22E-03 | transcription_start_site | - | 172537 | 172537 | -3297 | 30652 | AN8074 |
| 2581 | CONTIG139 | 177158 | 177802 | 1.17 | 1.07E-01 | transcription_start_site | - | 172974 | 172974 | -4506 | 30651 | AN8074 |
| 2581 | CONTIG139 | 177158 | 177802 | 1.17 | 1.07E-01 | transcription_start_site | - | 172537 | 172537 | -4943 | 30652 | AN8074 |
| 2680 | CONTIG139 | 174320 | 175493 | 1.13 | 1.44E-01 | transcription_start_site | - | 172974 | 172974 | -1932 | 30651 | AN8074 |
| 2680 | CONTIG139 | 174320 | 175493 | 1.13 | 1.44E-01 | transcription_start_site | - | 172537 | 172537 | -2369 | 30652 | AN8074 |
| 2680 | CONTIG139 | 174320 | 175493 | 1.13 | 1.44E-01 | transcription_start_site | - | 170389 | 170389 | -4517 | 30653 | AN8074 |
| 576  | CONTIG139 | 173780 | 174054 | 2.34 | 9.51E-04 | transcription_start_site | - | 174150 | 174150 | 233   | 30657 | AN8075 |
| 576  | CONTIG139 | 173780 | 174054 | 2.34 | 9.51E-04 | transcription_start_site | - | 174319 | 174319 | 402   | 30656 | AN8075 |
| 883  | CONTIG139 | 175665 | 176004 | 2.01 | 1.22E-03 | transcription_start_site | - | 175445 | 175445 | -389  | 30654 | AN8075 |
| 883  | CONTIG139 | 175665 | 176004 | 2.01 | 1.22E-03 | transcription_start_site | - | 175163 | 175163 | -671  | 30655 | AN8075 |
| 883  | CONTIG139 | 175665 | 176004 | 2.01 | 1.22E-03 | transcription_start_site | - | 174319 | 174319 | -1515 | 30656 | AN8075 |
| 883  | CONTIG139 | 175665 | 176004 | 2.01 | 1.22E-03 | transcription_start_site | - | 174150 | 174150 | -1684 | 30657 | AN8075 |
| 2181 | CONTIG139 | 178208 | 178552 | 1.3  | 8.01E-02 | transcription_start_site | - | 175445 | 175445 | -2935 | 30654 | AN8075 |
| 2181 | CONTIG139 | 178208 | 178552 | 1.3  | 8.01E-02 | transcription_start_site | - | 175163 | 175163 | -3217 | 30655 | AN8075 |
| 2181 | CONTIG139 | 178208 | 178552 | 1.3  | 8.01E-02 | transcription_start_site | - | 174319 | 174319 | -4061 | 30656 | AN8075 |
| 2181 | CONTIG139 | 178208 | 178552 | 1.3  | 8.01E-02 | transcription_start_site | - | 174150 | 174150 | -4230 | 30657 | AN8075 |
| 2581 | CONTIG139 | 177158 | 177802 | 1.17 | 1.07E-01 | transcription_start_site | - | 175445 | 175445 | -2035 | 30654 | AN8075 |
| 2581 | CONTIG139 | 177158 | 177802 | 1.17 | 1.07E-01 | transcription_start_site | - | 175163 | 175163 | -2317 | 30655 | AN8075 |
| 2581 | CONTIG139 | 177158 | 177802 | 1.17 | 1.07E-01 | transcription_start_site | - | 174319 | 174319 | -3161 | 30656 | AN8075 |
| 2581 | CONTIG139 | 177158 | 177802 | 1.17 | 1.07E-01 | transcription_start_site | - | 174150 | 174150 | -3330 | 30657 | AN8075 |
| 2680 | CONTIG139 | 174320 | 175493 | 1.13 | 1.44E-01 | transcription_start_site | - | 175163 | 175163 | 256   | 30655 | AN8075 |
| 2680 | CONTIG139 | 174320 | 175493 | 1.13 | 1.44E-01 | transcription_start_site | - | 175445 | 175445 | 538   | 30654 | AN8075 |
| 2680 | CONTIG139 | 174320 | 175493 | 1.13 | 1.44E-01 | transcription_start_site | - | 174319 | 174319 | -587  | 30656 | AN8075 |
| 2680 | CONTIG139 | 174320 | 175493 | 1.13 | 1.44E-01 | transcription_start_site | - | 174150 | 174150 | -756  | 30657 | AN8075 |
| 576  | CONTIG139 | 173780 | 174054 | 2.34 | 9.51E-04 | transcription_start_site | + | 176869 | 176869 | -2952 | 30658 | AN8076 |
| 883  | CONTIG139 | 175665 | 176004 | 2.01 | 1.22E-03 | transcription_start_site | + | 176869 | 176869 | -1034 | 30658 | AN8076 |
| 883  | CONTIG139 | 175665 | 176004 | 2.01 | 1.22E-03 | transcription_start_site | + | 180879 | 180879 | -5044 | 30659 | AN8076 |
| 2181 | CONTIG139 | 178208 | 178552 | 1.3  | 8.01E-02 | transcription_start_site | + | 180879 | 180879 | -2499 | 30659 | AN8076 |
| 2581 | CONTIG139 | 177158 | 177802 | 1.17 | 1.07E-01 | transcription_start_site | + | 176869 | 176869 | 611   | 30658 | AN8076 |

|      |           |        |        |      |          |                          |   |        |        |       |       |        |
|------|-----------|--------|--------|------|----------|--------------------------|---|--------|--------|-------|-------|--------|
| 2581 | CONTIG139 | 177158 | 177802 | 1.17 | 1.07E-01 | transcription_start_site | + | 180879 | 180879 | -3399 | 30659 | AN8076 |
| 2584 | CONTIG139 | 181146 | 181410 | 1.17 | 1.25E-01 | transcription_start_site | + | 180879 | 180879 | 399   | 30659 | AN8076 |
| 2680 | CONTIG139 | 174320 | 175493 | 1.13 | 1.44E-01 | transcription_start_site | + | 176869 | 176869 | -1962 | 30658 | AN8076 |
| 1873 | CONTIG139 | 182496 | 182835 | 1.42 | 5.22E-02 | transcription_start_site | + | 184344 | 184344 | -1678 | 30660 | AN8077 |
| 1873 | CONTIG139 | 182496 | 182835 | 1.42 | 5.22E-02 | transcription_start_site | + | 185029 | 185029 | -2363 | 30661 | AN8077 |
| 2584 | CONTIG139 | 181146 | 181410 | 1.17 | 1.25E-01 | transcription_start_site | + | 184344 | 184344 | -3066 | 30660 | AN8077 |
| 2584 | CONTIG139 | 181146 | 181410 | 1.17 | 1.25E-01 | transcription_start_site | + | 185029 | 185029 | -3751 | 30661 | AN8077 |
| 2677 | CONTIG139 | 183546 | 184120 | 1.13 | 1.28E-01 | transcription_start_site | + | 184344 | 184344 | -511  | 30660 | AN8077 |
| 2677 | CONTIG139 | 183546 | 184120 | 1.13 | 1.28E-01 | transcription_start_site | + | 185029 | 185029 | -1196 | 30661 | AN8077 |
| 1873 | CONTIG139 | 182496 | 182835 | 1.42 | 5.22E-02 | transcription_start_site | + | 186701 | 186701 | -4035 | 30662 | AN8078 |
| 1873 | CONTIG139 | 182496 | 182835 | 1.42 | 5.22E-02 | transcription_start_site | + | 186985 | 186985 | -4319 | 30663 | AN8078 |
| 1873 | CONTIG139 | 182496 | 182835 | 1.42 | 5.22E-02 | transcription_start_site | + | 187675 | 187675 | -5009 | 30664 | AN8078 |
| 2677 | CONTIG139 | 183546 | 184120 | 1.13 | 1.28E-01 | transcription_start_site | + | 186701 | 186701 | -2868 | 30662 | AN8078 |
| 2677 | CONTIG139 | 183546 | 184120 | 1.13 | 1.28E-01 | transcription_start_site | + | 186985 | 186985 | -3152 | 30663 | AN8078 |
| 2677 | CONTIG139 | 183546 | 184120 | 1.13 | 1.28E-01 | transcription_start_site | + | 187675 | 187675 | -3842 | 30664 | AN8078 |
| 2677 | CONTIG139 | 183546 | 184120 | 1.13 | 1.28E-01 | transcription_start_site | + | 188051 | 188051 | -4218 | 30665 | AN8078 |
| 2677 | CONTIG139 | 183546 | 184120 | 1.13 | 1.28E-01 | transcription_start_site | + | 188810 | 188810 | -4977 | 30666 | AN8079 |
| 2677 | CONTIG139 | 183546 | 184120 | 1.13 | 1.28E-01 | transcription_start_site | + | 189049 | 189049 | -5216 | 30667 | AN8079 |
| 2681 | CONTIG139 | 196592 | 197091 | 1.13 | 1.44E-01 | transcription_start_site | - | 194713 | 194713 | -2128 | 30674 | AN8081 |
| 2681 | CONTIG139 | 196592 | 197091 | 1.13 | 1.44E-01 | transcription_start_site | - | 194456 | 194456 | -2385 | 30675 | AN8081 |
| 2681 | CONTIG139 | 196592 | 197091 | 1.13 | 1.44E-01 | transcription_start_site | - | 193705 | 193705 | -3136 | 30676 | AN8081 |
| 2681 | CONTIG139 | 196592 | 197091 | 1.13 | 1.44E-01 | transcription_start_site | - | 193536 | 193536 | -3305 | 30677 | AN8081 |
| 2681 | CONTIG139 | 196592 | 197091 | 1.13 | 1.44E-01 | transcription_start_site | - | 193336 | 193336 | -3505 | 30678 | AN8081 |
| 2682 | CONTIG139 | 215795 | 216139 | 1.13 | 1.44E-01 | transcription_start_site | - | 215341 | 215341 | -626  | 30700 | AN8087 |
| 2682 | CONTIG139 | 215795 | 216139 | 1.13 | 1.44E-01 | transcription_start_site | - | 215282 | 215282 | -685  | 30701 | AN8087 |
| 2682 | CONTIG139 | 215795 | 216139 | 1.13 | 1.44E-01 | transcription_start_site | + | 215980 | 215980 | -13   | 30703 | AN8088 |
| 2682 | CONTIG139 | 215795 | 216139 | 1.13 | 1.44E-01 | transcription_start_site | + | 215901 | 215901 | 66    | 30702 | AN8088 |
| 2682 | CONTIG139 | 215795 | 216139 | 1.13 | 1.44E-01 | transcription_start_site | + | 216395 | 216395 | -428  | 30704 | AN8088 |
| 2682 | CONTIG139 | 215795 | 216139 | 1.13 | 1.44E-01 | transcription_start_site | + | 217280 | 217280 | -1313 | 30705 | AN8088 |
| 2682 | CONTIG139 | 215795 | 216139 | 1.13 | 1.44E-01 | transcription_start_site | + | 217523 | 217523 | -1556 | 30706 | AN8088 |
| 2682 | CONTIG139 | 215795 | 216139 | 1.13 | 1.44E-01 | transcription_start_site | + | 218515 | 218515 | -2548 | 30707 | AN8089 |
| 2682 | CONTIG139 | 215795 | 216139 | 1.13 | 1.44E-01 | transcription_start_site | + | 218617 | 218617 | -2650 | 30708 | AN8089 |
| 2682 | CONTIG139 | 215795 | 216139 | 1.13 | 1.44E-01 | transcription_start_site | + | 219185 | 219185 | -3218 | 30709 | AN8089 |
| 2682 | CONTIG139 | 215795 | 216139 | 1.13 | 1.44E-01 | transcription_start_site | + | 219362 | 219362 | -3395 | 30710 | AN8089 |
| 2682 | CONTIG139 | 215795 | 216139 | 1.13 | 1.44E-01 | transcription_start_site | + | 219693 | 219693 | -3726 | 30711 | AN8089 |
| 508  | CONTIG139 | 253661 | 254010 | 2.43 | 5.64E-04 | transcription_start_site | - | 253243 | 253243 | -592  | 30739 | AN8098 |
| 508  | CONTIG139 | 253661 | 254010 | 2.43 | 5.64E-04 | transcription_start_site | - | 253155 | 253155 | -680  | 30740 | AN8098 |
| 508  | CONTIG139 | 253661 | 254010 | 2.43 | 5.64E-04 | transcription_start_site | - | 252857 | 252857 | -978  | 30741 | AN8098 |
| 508  | CONTIG139 | 253661 | 254010 | 2.43 | 5.64E-04 | transcription_start_site | + | 255794 | 255794 | -1958 | 30742 | AN8099 |
| 508  | CONTIG139 | 253661 | 254010 | 2.43 | 5.64E-04 | transcription_start_site | + | 256148 | 256148 | -2312 | 30743 | AN8099 |
| 508  | CONTIG139 | 253661 | 254010 | 2.43 | 5.64E-04 | transcription_start_site | + | 256295 | 256295 | -2459 | 30744 | AN8099 |
| 508  | CONTIG139 | 253661 | 254010 | 2.43 | 5.64E-04 | transcription_start_site | + | 256543 | 256543 | -2707 | 30745 | AN8099 |
| 508  | CONTIG139 | 253661 | 254010 | 2.43 | 5.64E-04 | transcription_start_site | + | 256659 | 256659 | -2823 | 30746 | AN8099 |
| 508  | CONTIG139 | 253661 | 254010 | 2.43 | 5.64E-04 | transcription_start_site | + | 256857 | 256857 | -3021 | 30747 | AN8099 |
| 508  | CONTIG139 | 253661 | 254010 | 2.43 | 5.64E-04 | transcription_start_site | + | 257413 | 257413 | -3577 | 30748 | AN8099 |
| 2683 | CONTIG139 | 283218 | 283477 | 1.13 | 1.44E-01 | transcription_start_site | + | 282481 | 282481 | 866   | 30764 | AN8108 |
| 2683 | CONTIG139 | 283218 | 283477 | 1.13 | 1.44E-01 | transcription_start_site | - | 283240 | 283240 | -107  | 30769 | AN8109 |
| 2683 | CONTIG139 | 283218 | 283477 | 1.13 | 1.44E-01 | transcription_start_site | - | 283948 | 283948 | 600   | 30768 | AN8109 |
| 2683 | CONTIG139 | 283218 | 283477 | 1.13 | 1.44E-01 | transcription_start_site | - | 284180 | 284180 | 832   | 30767 | AN8109 |
| 2683 | CONTIG139 | 283218 | 283477 | 1.13 | 1.44E-01 | transcription_start_site | - | 284418 | 284418 | 1070  | 30766 | AN8109 |
| 2683 | CONTIG139 | 283218 | 283477 | 1.13 | 1.44E-01 | transcription_start_site | + | 286102 | 286102 | -2754 | 30770 | AN8110 |
| 2683 | CONTIG139 | 283218 | 283477 | 1.13 | 1.44E-01 | transcription_start_site | + | 286376 | 286376 | -3028 | 30771 | AN8110 |
| 2683 | CONTIG139 | 283218 | 283477 | 1.13 | 1.44E-01 | transcription_start_site | + | 286536 | 286536 | -3188 | 30772 | AN8110 |
| 2683 | CONTIG139 | 283218 | 283477 | 1.13 | 1.44E-01 | transcription_start_site | + | 286997 | 286997 | -3649 | 30773 | AN8110 |
| 2683 | CONTIG139 | 283218 | 283477 | 1.13 | 1.44E-01 | transcription_start_site | + | 287258 | 287258 | -3910 | 30774 | AN8110 |
| 1327 | CONTIG139 | 312079 | 312893 | 1.67 | 1.84E-02 | transcription_start_site | - | 310969 | 310969 | -1517 | 30789 | AN8117 |
| 1327 | CONTIG139 | 312079 | 312893 | 1.67 | 1.84E-02 | transcription_start_site | - | 310517 | 310517 | -1969 | 30790 | AN8117 |



|                |        |        |      |          |                          |   |        |        |       |              |
|----------------|--------|--------|------|----------|--------------------------|---|--------|--------|-------|--------------|
| 1327 CONTIG139 | 312079 | 312893 | 1.67 | 1.84E-02 | transcription_start_site | - | 310175 | 310175 | -2311 | 30791 AN8117 |
| 1327 CONTIG139 | 312079 | 312893 | 1.67 | 1.84E-02 | transcription_start_site | + | 312623 | 312623 | -137  | 30793 AN8118 |
| 1327 CONTIG139 | 312079 | 312893 | 1.67 | 1.84E-02 | transcription_start_site | + | 312260 | 312260 | 226   | 30792 AN8118 |
| 1327 CONTIG139 | 312079 | 312893 | 1.67 | 1.84E-02 | transcription_start_site | + | 312755 | 312755 | -269  | 30794 AN8118 |
| 1327 CONTIG139 | 312079 | 312893 | 1.67 | 1.84E-02 | transcription_start_site | + | 312936 | 312936 | -450  | 30795 AN8118 |
| 1041 CONTIG139 | 318912 | 319341 | 1.88 | 7.85E-03 | transcription_start_site | - | 315011 | 315011 | -4115 | 30796 AN8119 |
| 1041 CONTIG139 | 318912 | 319341 | 1.88 | 7.85E-03 | transcription_start_site | - | 314784 | 314784 | -4342 | 30797 AN8119 |
| 1041 CONTIG139 | 318912 | 319341 | 1.88 | 7.85E-03 | transcription_start_site | - | 314460 | 314460 | -4666 | 30798 AN8119 |
| 1327 CONTIG139 | 312079 | 312893 | 1.67 | 1.84E-02 | transcription_start_site | - | 313785 | 313785 | 1299  | 30799 AN8119 |
| 1327 CONTIG139 | 312079 | 312893 | 1.67 | 1.84E-02 | transcription_start_site | + | 315256 | 315256 | -2770 | 30800 AN8120 |
| 1327 CONTIG139 | 312079 | 312893 | 1.67 | 1.84E-02 | transcription_start_site | + | 315371 | 315371 | -2885 | 30801 AN8120 |
| 809 CONTIG139  | 322962 | 323983 | 2.09 | 0.00E+00 | transcription_start_site | - | 322522 | 322522 | -950  | 30802 AN8121 |
| 809 CONTIG139  | 322962 | 323983 | 2.09 | 0.00E+00 | transcription_start_site | + | 323973 | 323973 | -500  | 30803 AN8122 |
| 809 CONTIG139  | 322962 | 323983 | 2.09 | 0.00E+00 | transcription_start_site | + | 324426 | 324426 | -953  | 30804 AN8122 |
| 809 CONTIG139  | 322962 | 323983 | 2.09 | 0.00E+00 | transcription_start_site | + | 325422 | 325422 | -1949 | 30805 AN8122 |
| 1041 CONTIG139 | 318912 | 319341 | 1.88 | 7.85E-03 | transcription_start_site | + | 323973 | 323973 | -4846 | 30803 AN8122 |
| 1192 CONTIG139 | 330087 | 330651 | 1.76 | 5.41E-03 | transcription_start_site | - | 327486 | 327486 | -2883 | 30806 AN8123 |
| 1192 CONTIG139 | 330087 | 330651 | 1.76 | 5.41E-03 | transcription_start_site | - | 327144 | 327144 | -3225 | 30807 AN8123 |
| 1192 CONTIG139 | 330087 | 330651 | 1.76 | 5.41E-03 | transcription_start_site | - | 326922 | 326922 | -3447 | 30808 AN8123 |
| 1192 CONTIG139 | 330087 | 330651 | 1.76 | 5.41E-03 | transcription_start_site | - | 326763 | 326763 | -3606 | 30809 AN8123 |
| 1192 CONTIG139 | 330087 | 330651 | 1.76 | 5.41E-03 | transcription_start_site | - | 326529 | 326529 | -3840 | 30810 AN8123 |
| 1192 CONTIG139 | 330087 | 330651 | 1.76 | 5.41E-03 | transcription_start_site | - | 326366 | 326366 | -4003 | 30811 AN8123 |
| 809 CONTIG139  | 322962 | 323983 | 2.09 | 0.00E+00 | transcription_start_site | + | 328125 | 328125 | -4652 | 30812 AN8124 |
| 809 CONTIG139  | 322962 | 323983 | 2.09 | 0.00E+00 | transcription_start_site | + | 328398 | 328398 | -4925 | 30813 AN8124 |
| 809 CONTIG139  | 322962 | 323983 | 2.09 | 0.00E+00 | transcription_start_site | + | 328651 | 328651 | -5178 | 30814 AN8124 |
| 809 CONTIG139  | 322962 | 323983 | 2.09 | 0.00E+00 | transcription_start_site | + | 328860 | 328860 | -5387 | 30815 AN8124 |
| 1192 CONTIG139 | 330087 | 330651 | 1.76 | 5.41E-03 | transcription_start_site | + | 329894 | 329894 | 475   | 30820 AN8124 |
| 1192 CONTIG139 | 330087 | 330651 | 1.76 | 5.41E-03 | transcription_start_site | + | 329682 | 329682 | 687   | 30819 AN8124 |
| 1192 CONTIG139 | 330087 | 330651 | 1.76 | 5.41E-03 | transcription_start_site | + | 329347 | 329347 | 1022  | 30818 AN8124 |
| 1192 CONTIG139 | 330087 | 330651 | 1.76 | 5.41E-03 | transcription_start_site | + | 329241 | 329241 | 1128  | 30817 AN8124 |
| 1192 CONTIG139 | 330087 | 330651 | 1.76 | 5.41E-03 | transcription_start_site | + | 330563 | 330563 | -194  | 30821 AN8125 |
| 1192 CONTIG139 | 330087 | 330651 | 1.76 | 5.41E-03 | transcription_start_site | + | 331530 | 331530 | -1161 | 30822 AN8125 |
| 1192 CONTIG139 | 330087 | 330651 | 1.76 | 5.41E-03 | transcription_start_site | + | 331835 | 331835 | -1466 | 30823 AN8125 |
| 1192 CONTIG139 | 330087 | 330651 | 1.76 | 5.41E-03 | transcription_start_site | + | 332015 | 332015 | -1646 | 30824 AN8125 |
| 480 CONTIG139  | 345837 | 346261 | 2.47 | 6.10E-04 | transcription_start_site | - | 341712 | 341712 | -4337 | 30827 AN8128 |
| 480 CONTIG139  | 345837 | 346261 | 2.47 | 6.10E-04 | transcription_start_site | - | 341135 | 341135 | -4914 | 30828 AN8128 |
| 480 CONTIG139  | 345837 | 346261 | 2.47 | 6.10E-04 | transcription_start_site | - | 345721 | 345721 | -328  | 30829 AN8129 |
| 480 CONTIG139  | 345837 | 346261 | 2.47 | 6.10E-04 | transcription_start_site | - | 344780 | 344780 | -1269 | 30830 AN8129 |
| 480 CONTIG139  | 345837 | 346261 | 2.47 | 6.10E-04 | transcription_start_site | - | 343926 | 343926 | -2123 | 30831 AN8129 |
| 1358 CONTIG140 | 12829  | 13263  | 1.66 | 4.36E-02 | transcription_start_site | - | 9063   | 9063   | -3983 | 30842 AN8133 |
| 1358 CONTIG140 | 12829  | 13263  | 1.66 | 4.36E-02 | transcription_start_site | - | 8205   | 8205   | -4841 | 30843 AN8133 |
| 1358 CONTIG140 | 12829  | 13263  | 1.66 | 4.36E-02 | transcription_start_site | - | 8005   | 8005   | -5041 | 30844 AN8133 |
| 1881 CONTIG140 | 13354  | 13933  | 1.42 | 9.24E-02 | transcription_start_site | - | 9063   | 9063   | -4580 | 30842 AN8133 |
| 1358 CONTIG140 | 12829  | 13263  | 1.66 | 4.36E-02 | transcription_start_site | - | 12628  | 12628  | -418  | 30845 AN8134 |
| 1358 CONTIG140 | 12829  | 13263  | 1.66 | 4.36E-02 | transcription_start_site | - | 12513  | 12513  | -533  | 30846 AN8134 |
| 1358 CONTIG140 | 12829  | 13263  | 1.66 | 4.36E-02 | transcription_start_site | - | 12448  | 12448  | -598  | 30847 AN8134 |
| 1358 CONTIG140 | 12829  | 13263  | 1.66 | 4.36E-02 | transcription_start_site | - | 10870  | 10870  | -2176 | 30848 AN8134 |
| 1358 CONTIG140 | 12829  | 13263  | 1.66 | 4.36E-02 | transcription_start_site | - | 10501  | 10501  | -2545 | 30849 AN8134 |
| 1780 CONTIG140 | 16952  | 17241  | 1.47 | 8.01E-02 | transcription_start_site | - | 12628  | 12628  | -4468 | 30845 AN8134 |
| 1780 CONTIG140 | 16952  | 17241  | 1.47 | 8.01E-02 | transcription_start_site | - | 12513  | 12513  | -4583 | 30846 AN8134 |
| 1780 CONTIG140 | 16952  | 17241  | 1.47 | 8.01E-02 | transcription_start_site | - | 12448  | 12448  | -4648 | 30847 AN8134 |
| 1881 CONTIG140 | 13354  | 13933  | 1.42 | 9.24E-02 | transcription_start_site | - | 12628  | 12628  | -1015 | 30845 AN8134 |
| 1881 CONTIG140 | 13354  | 13933  | 1.42 | 9.24E-02 | transcription_start_site | - | 12513  | 12513  | -1130 | 30846 AN8134 |
| 1881 CONTIG140 | 13354  | 13933  | 1.42 | 9.24E-02 | transcription_start_site | - | 12448  | 12448  | -1195 | 30847 AN8134 |
| 1881 CONTIG140 | 13354  | 13933  | 1.42 | 9.24E-02 | transcription_start_site | - | 10870  | 10870  | -2773 | 30848 AN8134 |
| 1881 CONTIG140 | 13354  | 13933  | 1.42 | 9.24E-02 | transcription_start_site | - | 10501  | 10501  | -3142 | 30849 AN8134 |
| 1882 CONTIG140 | 16367  | 16701  | 1.42 | 9.24E-02 | transcription_start_site | - | 12628  | 12628  | -3906 | 30845 AN8134 |

|      |           |        |        |      |          |                          |   |        |        |       |       |        |
|------|-----------|--------|--------|------|----------|--------------------------|---|--------|--------|-------|-------|--------|
| 1882 | CONTIG140 | 16367  | 16701  | 1.42 | 9.24E-02 | transcription_start_site | - | 12513  | 12513  | -4021 | 30846 | AN8134 |
| 1882 | CONTIG140 | 16367  | 16701  | 1.42 | 9.24E-02 | transcription_start_site | - | 12448  | 12448  | -4086 | 30847 | AN8134 |
| 1358 | CONTIG140 | 12829  | 13263  | 1.66 | 4.36E-02 | transcription_start_site | + | 13454  | 13454  | -408  | 30850 | AN8135 |
| 1358 | CONTIG140 | 12829  | 13263  | 1.66 | 4.36E-02 | transcription_start_site | + | 13738  | 13738  | -692  | 30851 | AN8135 |
| 1358 | CONTIG140 | 12829  | 13263  | 1.66 | 4.36E-02 | transcription_start_site | + | 14139  | 14139  | -1093 | 30852 | AN8135 |
| 1881 | CONTIG140 | 13354  | 13933  | 1.42 | 9.24E-02 | transcription_start_site | + | 13738  | 13738  | -94   | 30851 | AN8135 |
| 1881 | CONTIG140 | 13354  | 13933  | 1.42 | 9.24E-02 | transcription_start_site | + | 13454  | 13454  | 189   | 30850 | AN8135 |
| 1881 | CONTIG140 | 13354  | 13933  | 1.42 | 9.24E-02 | transcription_start_site | + | 14139  | 14139  | -495  | 30852 | AN8135 |
| 1354 | CONTIG140 | 19887  | 20301  | 1.66 | 2.64E-02 | transcription_start_site | - | 17636  | 17636  | -2458 | 30853 | AN8136 |
| 1354 | CONTIG140 | 19887  | 20301  | 1.66 | 2.64E-02 | transcription_start_site | - | 17413  | 17413  | -2681 | 30854 | AN8136 |
| 1780 | CONTIG140 | 16952  | 17241  | 1.47 | 8.01E-02 | transcription_start_site | - | 17413  | 17413  | 316   | 30854 | AN8136 |
| 1780 | CONTIG140 | 16952  | 17241  | 1.47 | 8.01E-02 | transcription_start_site | - | 17636  | 17636  | 539   | 30853 | AN8136 |
| 1882 | CONTIG140 | 16367  | 16701  | 1.42 | 9.24E-02 | transcription_start_site | - | 17413  | 17413  | 879   | 30854 | AN8136 |
| 1882 | CONTIG140 | 16367  | 16701  | 1.42 | 9.24E-02 | transcription_start_site | - | 17636  | 17636  | 1102  | 30853 | AN8136 |
| 2418 | CONTIG140 | 19132  | 19788  | 1.23 | 1.50E-01 | transcription_start_site | - | 17636  | 17636  | -1824 | 30853 | AN8136 |
| 2418 | CONTIG140 | 19132  | 19788  | 1.23 | 1.50E-01 | transcription_start_site | - | 17413  | 17413  | -2047 | 30854 | AN8136 |
| 1354 | CONTIG140 | 19887  | 20301  | 1.66 | 2.64E-02 | transcription_start_site | + | 18888  | 18888  | 1206  | 30856 | AN8137 |
| 1358 | CONTIG140 | 12829  | 13263  | 1.66 | 4.36E-02 | transcription_start_site | + | 18050  | 18050  | -5004 | 30855 | AN8137 |
| 1780 | CONTIG140 | 16952  | 17241  | 1.47 | 8.01E-02 | transcription_start_site | + | 18050  | 18050  | -953  | 30855 | AN8137 |
| 1780 | CONTIG140 | 16952  | 17241  | 1.47 | 8.01E-02 | transcription_start_site | + | 18888  | 18888  | -1791 | 30856 | AN8137 |
| 1881 | CONTIG140 | 13354  | 13933  | 1.42 | 9.24E-02 | transcription_start_site | + | 18050  | 18050  | -4406 | 30855 | AN8137 |
| 1881 | CONTIG140 | 13354  | 13933  | 1.42 | 9.24E-02 | transcription_start_site | + | 18888  | 18888  | -5244 | 30856 | AN8137 |
| 1882 | CONTIG140 | 16367  | 16701  | 1.42 | 9.24E-02 | transcription_start_site | + | 18050  | 18050  | -1516 | 30855 | AN8137 |
| 1882 | CONTIG140 | 16367  | 16701  | 1.42 | 9.24E-02 | transcription_start_site | + | 18888  | 18888  | -2354 | 30856 | AN8137 |
| 2418 | CONTIG140 | 19132  | 19788  | 1.23 | 1.50E-01 | transcription_start_site | + | 18888  | 18888  | 572   | 30856 | AN8137 |
| 2269 | CONTIG140 | 25433  | 26092  | 1.28 | 1.44E-01 | transcription_start_site | - | 25570  | 25570  | -192  | 30857 | AN8138 |
| 2269 | CONTIG140 | 25433  | 26092  | 1.28 | 1.44E-01 | transcription_start_site | - | 25400  | 25400  | -362  | 30858 | AN8138 |
| 2269 | CONTIG140 | 25433  | 26092  | 1.28 | 1.44E-01 | transcription_start_site | - | 24710  | 24710  | -1052 | 30859 | AN8138 |
| 2791 | CONTIG141 | 8777   | 9136   | 1.07 | 1.08E-01 | transcription_start_site | - | 6139   | 6139   | -2817 | 30864 | AN8140 |
| 2791 | CONTIG141 | 8777   | 9136   | 1.07 | 1.08E-01 | transcription_start_site | - | 5718   | 5718   | -3238 | 30865 | AN8140 |
| 2791 | CONTIG141 | 8777   | 9136   | 1.07 | 1.08E-01 | transcription_start_site | + | 8037   | 8037   | 919   | 30870 | AN8141 |
| 2791 | CONTIG141 | 8777   | 9136   | 1.07 | 1.08E-01 | transcription_start_site | - | 9358   | 9358   | 401   | 30873 | AN8142 |
| 2791 | CONTIG141 | 8777   | 9136   | 1.07 | 1.08E-01 | transcription_start_site | - | 9742   | 9742   | 785   | 30872 | AN8142 |
| 2791 | CONTIG141 | 8777   | 9136   | 1.07 | 1.08E-01 | transcription_start_site | - | 9900   | 9900   | 943   | 30871 | AN8142 |
| 2792 | CONTIG141 | 15681  | 16120  | 1.07 | 1.08E-01 | transcription_start_site | - | 12024  | 12024  | -3876 | 30874 | AN8143 |
| 2792 | CONTIG141 | 15681  | 16120  | 1.07 | 1.08E-01 | transcription_start_site | - | 11597  | 11597  | -4303 | 30875 | AN8143 |
| 2792 | CONTIG141 | 15681  | 16120  | 1.07 | 1.08E-01 | transcription_start_site | - | 11156  | 11156  | -4744 | 30876 | AN8143 |
| 2791 | CONTIG141 | 8777   | 9136   | 1.07 | 1.08E-01 | transcription_start_site | + | 12546  | 12546  | -3589 | 30877 | AN8144 |
| 2791 | CONTIG141 | 8777   | 9136   | 1.07 | 1.08E-01 | transcription_start_site | + | 13155  | 13155  | -4198 | 30878 | AN8144 |
| 2791 | CONTIG141 | 8777   | 9136   | 1.07 | 1.08E-01 | transcription_start_site | + | 13575  | 13575  | -4618 | 30879 | AN8144 |
| 2792 | CONTIG141 | 15681  | 16120  | 1.07 | 1.08E-01 | transcription_start_site | - | 15808  | 15808  | -92   | 30880 | AN8145 |
| 2792 | CONTIG141 | 15681  | 16120  | 1.07 | 1.08E-01 | transcription_start_site | + | 16579  | 16579  | -678  | 30881 | AN8146 |
| 2792 | CONTIG141 | 15681  | 16120  | 1.07 | 1.08E-01 | transcription_start_site | + | 17068  | 17068  | -1167 | 30882 | AN8146 |
| 2900 | CONTIG141 | 27987  | 28251  | 1    | 1.44E-01 | transcription_start_site | - | 23982  | 23982  | -4137 | 30888 | AN8148 |
| 2900 | CONTIG141 | 27987  | 28251  | 1    | 1.44E-01 | transcription_start_site | - | 23622  | 23622  | -4497 | 30889 | AN8148 |
| 2900 | CONTIG141 | 27987  | 28251  | 1    | 1.44E-01 | transcription_start_site | - | 23207  | 23207  | -4912 | 30890 | AN8148 |
| 2900 | CONTIG141 | 27987  | 28251  | 1    | 1.44E-01 | transcription_start_site | + | 27419  | 27419  | 700   | 30895 | AN8149 |
| 2959 | CONTIG141 | 57977  | 58491  | 0.96 | 1.50E-01 | transcription_start_site | - | 58236  | 58236  | 2     | 30926 | AN8155 |
| 2959 | CONTIG141 | 57977  | 58491  | 0.96 | 1.50E-01 | transcription_start_site | - | 58117  | 58117  | -117  | 30927 | AN8155 |
| 2959 | CONTIG141 | 57977  | 58491  | 0.96 | 1.50E-01 | transcription_start_site | - | 57616  | 57616  | -618  | 30928 | AN8155 |
| 2959 | CONTIG141 | 57977  | 58491  | 0.96 | 1.50E-01 | transcription_start_site | - | 57410  | 57410  | -824  | 30929 | AN8155 |
| 2959 | CONTIG141 | 57977  | 58491  | 0.96 | 1.50E-01 | transcription_start_site | - | 57265  | 57265  | -969  | 30930 | AN8155 |
| 2552 | CONTIG141 | 105007 | 105506 | 1.18 | 5.05E-02 | transcription_start_site | - | 101133 | 101133 | -4123 | 30980 | AN8165 |
| 2793 | CONTIG141 | 105602 | 106116 | 1.07 | 1.08E-01 | transcription_start_site | - | 101133 | 101133 | -4726 | 30980 | AN8165 |
| 318  | CONTIG141 | 108017 | 108364 | 2.73 | 0.00E+00 | transcription_start_site | - | 106574 | 106574 | -1616 | 30983 | AN8167 |
| 318  | CONTIG141 | 108017 | 108364 | 2.73 | 0.00E+00 | transcription_start_site | - | 106345 | 106345 | -1845 | 30984 | AN8167 |
| 318  | CONTIG141 | 108017 | 108364 | 2.73 | 0.00E+00 | transcription_start_site | - | 106134 | 106134 | -2056 | 30985 | AN8167 |

|      |           |        |        |      |          |                          |   |        |        |       |       |        |
|------|-----------|--------|--------|------|----------|--------------------------|---|--------|--------|-------|-------|--------|
| 2552 | CONTIG141 | 105007 | 105506 | 1.18 | 5.05E-02 | transcription_start_site | - | 106134 | 106134 | 877   | 30985 | AN8167 |
| 2552 | CONTIG141 | 105007 | 105506 | 1.18 | 5.05E-02 | transcription_start_site | - | 106345 | 106345 | 1088  | 30984 | AN8167 |
| 2793 | CONTIG141 | 105602 | 106116 | 1.07 | 1.08E-01 | transcription_start_site | - | 106134 | 106134 | 275   | 30985 | AN8167 |
| 2793 | CONTIG141 | 105602 | 106116 | 1.07 | 1.08E-01 | transcription_start_site | - | 106345 | 106345 | 486   | 30984 | AN8167 |
| 2793 | CONTIG141 | 105602 | 106116 | 1.07 | 1.08E-01 | transcription_start_site | - | 106574 | 106574 | 715   | 30983 | AN8167 |
| 404  | CONTIG141 | 114542 | 115176 | 2.59 | 0.00E+00 | transcription_start_site | - | 113279 | 113279 | -1580 | 30986 | AN8168 |
| 404  | CONTIG141 | 114542 | 115176 | 2.59 | 0.00E+00 | transcription_start_site | - | 112567 | 112567 | -2292 | 30987 | AN8168 |
| 2100 | CONTIG141 | 113032 | 113601 | 1.33 | 3.70E-02 | transcription_start_site | - | 113279 | 113279 | -37   | 30986 | AN8168 |
| 2100 | CONTIG141 | 113032 | 113601 | 1.33 | 3.70E-02 | transcription_start_site | - | 112567 | 112567 | -749  | 30987 | AN8168 |
| 2557 | CONTIG141 | 111977 | 112261 | 1.18 | 6.84E-02 | transcription_start_site | - | 112567 | 112567 | 448   | 30987 | AN8168 |
| 2901 | CONTIG141 | 116262 | 116826 | 1    | 1.44E-01 | transcription_start_site | - | 113279 | 113279 | -3265 | 30986 | AN8168 |
| 2901 | CONTIG141 | 116262 | 116826 | 1    | 1.44E-01 | transcription_start_site | - | 112567 | 112567 | -3977 | 30987 | AN8168 |
| 2901 | CONTIG141 | 116262 | 116826 | 1    | 1.44E-01 | transcription_start_site | - | 116746 | 116746 | 202   | 30990 | AN8169 |
| 2901 | CONTIG141 | 116262 | 116826 | 1    | 1.44E-01 | transcription_start_site | - | 116274 | 116274 | -270  | 30991 | AN8169 |
| 2901 | CONTIG141 | 116262 | 116826 | 1    | 1.44E-01 | transcription_start_site | - | 117145 | 117145 | 601   | 30989 | AN8169 |
| 2901 | CONTIG141 | 116262 | 116826 | 1    | 1.44E-01 | transcription_start_site | - | 117782 | 117782 | 1238  | 30988 | AN8169 |
| 404  | CONTIG141 | 114542 | 115176 | 2.59 | 0.00E+00 | transcription_start_site | + | 119345 | 119345 | -4486 | 30992 | AN8170 |
| 404  | CONTIG141 | 114542 | 115176 | 2.59 | 0.00E+00 | transcription_start_site | + | 119593 | 119593 | -4734 | 30993 | AN8170 |
| 2901 | CONTIG141 | 116262 | 116826 | 1    | 1.44E-01 | transcription_start_site | + | 119345 | 119345 | -2801 | 30992 | AN8170 |
| 2901 | CONTIG141 | 116262 | 116826 | 1    | 1.44E-01 | transcription_start_site | + | 119593 | 119593 | -3049 | 30993 | AN8170 |
| 2901 | CONTIG141 | 116262 | 116826 | 1    | 1.44E-01 | transcription_start_site | + | 120474 | 120474 | -3930 | 30994 | AN8170 |
| 2902 | CONTIG141 | 124427 | 124711 | 1    | 1.44E-01 | transcription_start_site | - | 124037 | 124037 | -532  | 30995 | AN8171 |
| 2902 | CONTIG141 | 124427 | 124711 | 1    | 1.44E-01 | transcription_start_site | - | 123518 | 123518 | -1051 | 30996 | AN8171 |
| 2902 | CONTIG141 | 124427 | 124711 | 1    | 1.44E-01 | transcription_start_site | - | 121866 | 121866 | -2703 | 30997 | AN8171 |
| 2902 | CONTIG141 | 124427 | 124711 | 1    | 1.44E-01 | transcription_start_site | - | 121525 | 121525 | -3044 | 30998 | AN8171 |
| 2902 | CONTIG141 | 124427 | 124711 | 1    | 1.44E-01 | transcription_start_site | - | 120728 | 120728 | -3841 | 30999 | AN8171 |
| 2902 | CONTIG141 | 124427 | 124711 | 1    | 1.44E-01 | transcription_start_site | + | 124894 | 124894 | -325  | 31000 | AN8172 |
| 2902 | CONTIG141 | 124427 | 124711 | 1    | 1.44E-01 | transcription_start_site | + | 125080 | 125080 | -511  | 31001 | AN8172 |
| 2902 | CONTIG141 | 124427 | 124711 | 1    | 1.44E-01 | transcription_start_site | + | 125700 | 125700 | -1131 | 31002 | AN8172 |
| 2902 | CONTIG141 | 124427 | 124711 | 1    | 1.44E-01 | transcription_start_site | + | 127220 | 127220 | -2651 | 31003 | AN8173 |
| 2101 | CONTIG141 | 132452 | 132886 | 1.33 | 3.70E-02 | transcription_start_site | - | 131798 | 131798 | -871  | 31004 | AN8174 |
| 2101 | CONTIG141 | 132452 | 132886 | 1.33 | 3.70E-02 | transcription_start_site | - | 131633 | 131633 | -1036 | 31005 | AN8174 |
| 2101 | CONTIG141 | 132452 | 132886 | 1.33 | 3.70E-02 | transcription_start_site | - | 131136 | 131136 | -1533 | 31006 | AN8174 |
| 2101 | CONTIG141 | 132452 | 132886 | 1.33 | 3.70E-02 | transcription_start_site | - | 130984 | 130984 | -1685 | 31007 | AN8174 |
| 2101 | CONTIG141 | 132452 | 132886 | 1.33 | 3.70E-02 | transcription_start_site | - | 130279 | 130279 | -2390 | 31008 | AN8174 |
| 2210 | CONTIG141 | 133502 | 133786 | 1.29 | 4.36E-02 | transcription_start_site | - | 131798 | 131798 | -1846 | 31004 | AN8174 |
| 2210 | CONTIG141 | 133502 | 133786 | 1.29 | 4.36E-02 | transcription_start_site | - | 131633 | 131633 | -2011 | 31005 | AN8174 |
| 2210 | CONTIG141 | 133502 | 133786 | 1.29 | 4.36E-02 | transcription_start_site | - | 131136 | 131136 | -2508 | 31006 | AN8174 |
| 2210 | CONTIG141 | 133502 | 133786 | 1.29 | 4.36E-02 | transcription_start_site | - | 130984 | 130984 | -2660 | 31007 | AN8174 |
| 2210 | CONTIG141 | 133502 | 133786 | 1.29 | 4.36E-02 | transcription_start_site | - | 130279 | 130279 | -3365 | 31008 | AN8174 |
| 2722 | CONTIG141 | 134942 | 135291 | 1.11 | 9.24E-02 | transcription_start_site | - | 131798 | 131798 | -3318 | 31004 | AN8174 |
| 2722 | CONTIG141 | 134942 | 135291 | 1.11 | 9.24E-02 | transcription_start_site | - | 131633 | 131633 | -3483 | 31005 | AN8174 |
| 2722 | CONTIG141 | 134942 | 135291 | 1.11 | 9.24E-02 | transcription_start_site | - | 131136 | 131136 | -3980 | 31006 | AN8174 |
| 2722 | CONTIG141 | 134942 | 135291 | 1.11 | 9.24E-02 | transcription_start_site | - | 130984 | 130984 | -4132 | 31007 | AN8174 |
| 2722 | CONTIG141 | 134942 | 135291 | 1.11 | 9.24E-02 | transcription_start_site | - | 130279 | 130279 | -4837 | 31008 | AN8174 |
| 2101 | CONTIG141 | 132452 | 132886 | 1.33 | 3.70E-02 | transcription_start_site | + | 134223 | 134223 | -1554 | 31009 | AN8175 |
| 2210 | CONTIG141 | 133502 | 133786 | 1.29 | 4.36E-02 | transcription_start_site | + | 134223 | 134223 | -579  | 31009 | AN8175 |
| 2722 | CONTIG141 | 134942 | 135291 | 1.11 | 9.24E-02 | transcription_start_site | + | 134223 | 134223 | 893   | 31009 | AN8175 |
| 2315 | CONTIG141 | 139877 | 140376 | 1.26 | 5.22E-02 | transcription_start_site | + | 139730 | 139730 | 396   | 31012 | AN8176 |
| 2315 | CONTIG141 | 139877 | 140376 | 1.26 | 5.22E-02 | transcription_start_site | + | 139570 | 139570 | 556   | 31011 | AN8176 |
| 2315 | CONTIG141 | 139877 | 140376 | 1.26 | 5.22E-02 | transcription_start_site | + | 139337 | 139337 | 789   | 31010 | AN8176 |
| 2722 | CONTIG141 | 134942 | 135291 | 1.11 | 9.24E-02 | transcription_start_site | + | 139337 | 139337 | -4220 | 31010 | AN8176 |
| 2722 | CONTIG141 | 134942 | 135291 | 1.11 | 9.24E-02 | transcription_start_site | + | 139570 | 139570 | -4453 | 31011 | AN8176 |
| 2722 | CONTIG141 | 134942 | 135291 | 1.11 | 9.24E-02 | transcription_start_site | + | 139730 | 139730 | -4613 | 31012 | AN8176 |
| 2960 | CONTIG141 | 157067 | 157551 | 0.96 | 1.50E-01 | transcription_start_site | + | 157874 | 157874 | -565  | 31026 | AN8180 |
| 2960 | CONTIG141 | 157067 | 157551 | 0.96 | 1.50E-01 | transcription_start_site | + | 156369 | 156369 | 940   | 31025 | AN8180 |
| 2960 | CONTIG141 | 157067 | 157551 | 0.96 | 1.50E-01 | transcription_start_site | + | 156168 | 156168 | 1141  | 31024 | AN8180 |

|      |           |        |        |      |          |                          |   |        |        |       |       |        |
|------|-----------|--------|--------|------|----------|--------------------------|---|--------|--------|-------|-------|--------|
| 1034 | CONTIG141 | 159917 | 160251 | 1.88 | 2.22E-03 | transcription_start_site | + | 161421 | 161421 | -1337 | 31027 | AN8181 |
| 1034 | CONTIG141 | 159917 | 160251 | 1.88 | 2.22E-03 | transcription_start_site | + | 161601 | 161601 | -1517 | 31028 | AN8181 |
| 1034 | CONTIG141 | 159917 | 160251 | 1.88 | 2.22E-03 | transcription_start_site | + | 162049 | 162049 | -1965 | 31029 | AN8181 |
| 2960 | CONTIG141 | 157067 | 157551 | 0.96 | 1.50E-01 | transcription_start_site | + | 161421 | 161421 | -4112 | 31027 | AN8181 |
| 2960 | CONTIG141 | 157067 | 157551 | 0.96 | 1.50E-01 | transcription_start_site | + | 161601 | 161601 | -4292 | 31028 | AN8181 |
| 2960 | CONTIG141 | 157067 | 157551 | 0.96 | 1.50E-01 | transcription_start_site | + | 162049 | 162049 | -4740 | 31029 | AN8181 |
| 2430 | CONTIG141 | 184427 | 184851 | 1.22 | 3.99E-02 | transcription_start_site | + | 183699 | 183699 | 940   | 31055 | AN8187 |
| 2430 | CONTIG141 | 184427 | 184851 | 1.22 | 3.99E-02 | transcription_start_site | + | 184490 | 184490 | 149   | 31056 | AN8188 |
| 2430 | CONTIG141 | 184427 | 184851 | 1.22 | 3.99E-02 | transcription_start_site | + | 184793 | 184793 | -154  | 31057 | AN8188 |
| 2430 | CONTIG141 | 184427 | 184851 | 1.22 | 3.99E-02 | transcription_start_site | + | 184982 | 184982 | -343  | 31058 | AN8188 |
| 2430 | CONTIG141 | 184427 | 184851 | 1.22 | 3.99E-02 | transcription_start_site | + | 185337 | 185337 | -698  | 31059 | AN8188 |
| 2430 | CONTIG141 | 184427 | 184851 | 1.22 | 3.99E-02 | transcription_start_site | + | 186616 | 186616 | -1977 | 31060 | AN8189 |
| 2102 | CONTIG141 | 191327 | 191676 | 1.33 | 3.70E-02 | transcription_start_site | + | 191057 | 191057 | 444   | 31061 | AN8190 |
| 2102 | CONTIG141 | 191327 | 191676 | 1.33 | 3.70E-02 | transcription_start_site | + | 192310 | 192310 | -808  | 31062 | AN8190 |
| 2102 | CONTIG141 | 191327 | 191676 | 1.33 | 3.70E-02 | transcription_start_site | + | 194221 | 194221 | -2719 | 31063 | AN8190 |
| 2866 | CONTIG141 | 192307 | 192576 | 1.03 | 1.25E-01 | transcription_start_site | + | 192310 | 192310 | 131   | 31062 | AN8190 |
| 2866 | CONTIG141 | 192307 | 192576 | 1.03 | 1.25E-01 | transcription_start_site | + | 194221 | 194221 | -1779 | 31063 | AN8190 |
| 2102 | CONTIG141 | 191327 | 191676 | 1.33 | 3.70E-02 | transcription_start_site | + | 195800 | 195800 | -4298 | 31064 | AN8191 |
| 2102 | CONTIG141 | 191327 | 191676 | 1.33 | 3.70E-02 | transcription_start_site | + | 195914 | 195914 | -4412 | 31065 | AN8191 |
| 2866 | CONTIG141 | 192307 | 192576 | 1.03 | 1.25E-01 | transcription_start_site | + | 195800 | 195800 | -3358 | 31064 | AN8191 |
| 2866 | CONTIG141 | 192307 | 192576 | 1.03 | 1.25E-01 | transcription_start_site | + | 195914 | 195914 | -3472 | 31065 | AN8191 |
| 2866 | CONTIG141 | 192307 | 192576 | 1.03 | 1.25E-01 | transcription_start_site | + | 196732 | 196732 | -4290 | 31066 | AN8191 |
| 284  | CONTIG142 | 7820   | 8529   | 2.79 | 2.39E-04 | transcription_start_site | + | 9257   | 9257   | -1082 | 31080 | AN8195 |
| 284  | CONTIG142 | 7820   | 8529   | 2.79 | 2.39E-04 | transcription_start_site | + | 11279  | 11279  | -3104 | 31081 | AN8196 |
| 284  | CONTIG142 | 7820   | 8529   | 2.79 | 2.39E-04 | transcription_start_site | + | 11781  | 11781  | -3606 | 31082 | AN8196 |
| 284  | CONTIG142 | 7820   | 8529   | 2.79 | 2.39E-04 | transcription_start_site | + | 11950  | 11950  | -3775 | 31083 | AN8196 |
| 1308 | CONTIG142 | 12530  | 12814  | 1.69 | 3.08E-02 | transcription_start_site | + | 11950  | 11950  | 722   | 31083 | AN8196 |
| 1308 | CONTIG142 | 12530  | 12814  | 1.69 | 3.08E-02 | transcription_start_site | + | 11781  | 11781  | 891   | 31082 | AN8196 |
| 2261 | CONTIG142 | 11190  | 11619  | 1.28 | 1.07E-01 | transcription_start_site | + | 11279  | 11279  | 125   | 31081 | AN8196 |
| 2261 | CONTIG142 | 11190  | 11619  | 1.28 | 1.07E-01 | transcription_start_site | + | 11781  | 11781  | -376  | 31082 | AN8196 |
| 2261 | CONTIG142 | 11190  | 11619  | 1.28 | 1.07E-01 | transcription_start_site | + | 11950  | 11950  | -545  | 31083 | AN8196 |
| 1236 | CONTIG142 | 19651  | 20463  | 1.74 | 2.62E-02 | transcription_start_site | - | 18517  | 18517  | -1540 | 31086 | AN8198 |
| 1236 | CONTIG142 | 19651  | 20463  | 1.74 | 2.62E-02 | transcription_start_site | - | 18167  | 18167  | -1890 | 31087 | AN8198 |
| 1236 | CONTIG142 | 19651  | 20463  | 1.74 | 2.62E-02 | transcription_start_site | - | 17679  | 17679  | -2378 | 31088 | AN8198 |
| 1236 | CONTIG142 | 19651  | 20463  | 1.74 | 2.62E-02 | transcription_start_site | - | 17410  | 17410  | -2647 | 31089 | AN8198 |
| 1236 | CONTIG142 | 19651  | 20463  | 1.74 | 2.62E-02 | transcription_start_site | - | 17149  | 17149  | -2908 | 31090 | AN8198 |
| 1236 | CONTIG142 | 19651  | 20463  | 1.74 | 2.62E-02 | transcription_start_site | - | 17036  | 17036  | -3021 | 31091 | AN8198 |
| 1236 | CONTIG142 | 19651  | 20463  | 1.74 | 2.62E-02 | transcription_start_site | - | 16903  | 16903  | -3154 | 31092 | AN8198 |
| 1236 | CONTIG142 | 19651  | 20463  | 1.74 | 2.62E-02 | transcription_start_site | - | 16340  | 16340  | -3717 | 31093 | AN8198 |
| 1236 | CONTIG142 | 19651  | 20463  | 1.74 | 2.62E-02 | transcription_start_site | - | 16131  | 16131  | -3926 | 31094 | AN8198 |
| 1236 | CONTIG142 | 19651  | 20463  | 1.74 | 2.62E-02 | transcription_start_site | + | 20259  | 20259  | -202  | 31095 | AN8199 |
| 1236 | CONTIG142 | 19651  | 20463  | 1.74 | 2.62E-02 | transcription_start_site | + | 20469  | 20469  | -412  | 31096 | AN8199 |
| 1236 | CONTIG142 | 19651  | 20463  | 1.74 | 2.62E-02 | transcription_start_site | + | 21037  | 21037  | -980  | 31097 | AN8199 |
| 1236 | CONTIG142 | 19651  | 20463  | 1.74 | 2.62E-02 | transcription_start_site | + | 21505  | 21505  | -1448 | 31098 | AN8199 |
| 162  | CONTIG143 | 14626  | 15065  | 3.03 | 1.80E-03 | transcription_start_site | - | 12734  | 12734  | -2111 | 31133 | AN8209 |
| 162  | CONTIG143 | 14626  | 15065  | 3.03 | 1.80E-03 | transcription_start_site | - | 12389  | 12389  | -2456 | 31134 | AN8209 |
| 162  | CONTIG143 | 14626  | 15065  | 3.03 | 1.80E-03 | transcription_start_site | - | 12048  | 12048  | -2797 | 31135 | AN8209 |
| 865  | CONTIG143 | 15621  | 16335  | 2.04 | 4.36E-02 | transcription_start_site | - | 12734  | 12734  | -3244 | 31133 | AN8209 |
| 865  | CONTIG143 | 15621  | 16335  | 2.04 | 4.36E-02 | transcription_start_site | - | 12389  | 12389  | -3589 | 31134 | AN8209 |
| 865  | CONTIG143 | 15621  | 16335  | 2.04 | 4.36E-02 | transcription_start_site | - | 12048  | 12048  | -3930 | 31135 | AN8209 |
| 994  | CONTIG143 | 13281  | 14245  | 1.92 | 3.61E-02 | transcription_start_site | - | 12734  | 12734  | -1029 | 31133 | AN8209 |
| 994  | CONTIG143 | 13281  | 14245  | 1.92 | 3.61E-02 | transcription_start_site | - | 12389  | 12389  | -1374 | 31134 | AN8209 |
| 994  | CONTIG143 | 13281  | 14245  | 1.92 | 3.61E-02 | transcription_start_site | - | 12048  | 12048  | -1715 | 31135 | AN8209 |
| 994  | CONTIG143 | 13281  | 14245  | 1.92 | 3.61E-02 | transcription_start_site | - | 8569   | 8569   | -5194 | 31136 | AN8209 |
| 1542 | CONTIG143 | 6546   | 6965   | 1.57 | 1.44E-01 | transcription_start_site | - | 7769   | 7769   | 1013  | 31137 | AN8209 |
| 162  | CONTIG143 | 14626  | 15065  | 3.03 | 1.80E-03 | transcription_start_site | + | 15450  | 15450  | -604  | 31138 | AN8210 |
| 162  | CONTIG143 | 14626  | 15065  | 3.03 | 1.80E-03 | transcription_start_site | + | 20021  | 20021  | -5175 | 31139 | AN8210 |

|      |           |       |       |      |          |                          |   |       |       |       |       |        |
|------|-----------|-------|-------|------|----------|--------------------------|---|-------|-------|-------|-------|--------|
| 865  | CONTIG143 | 15621 | 16335 | 2.04 | 4.36E-02 | transcription_start_site | + | 15450 | 15450 | 528   | 31138 | AN8210 |
| 865  | CONTIG143 | 15621 | 16335 | 2.04 | 4.36E-02 | transcription_start_site | + | 20021 | 20021 | -4043 | 31139 | AN8210 |
| 865  | CONTIG143 | 15621 | 16335 | 2.04 | 4.36E-02 | transcription_start_site | + | 20220 | 20220 | -4242 | 31140 | AN8210 |
| 865  | CONTIG143 | 15621 | 16335 | 2.04 | 4.36E-02 | transcription_start_site | + | 20269 | 20269 | -4291 | 31141 | AN8210 |
| 994  | CONTIG143 | 13281 | 14245 | 1.92 | 3.61E-02 | transcription_start_site | + | 15450 | 15450 | -1687 | 31138 | AN8210 |
| 1413 | CONTIG143 | 27681 | 27965 | 1.63 | 1.25E-01 | transcription_start_site | - | 27599 | 27599 | -224  | 31142 | AN8211 |
| 1413 | CONTIG143 | 27681 | 27965 | 1.63 | 1.25E-01 | transcription_start_site | - | 27127 | 27127 | -696  | 31143 | AN8211 |
| 1413 | CONTIG143 | 27681 | 27965 | 1.63 | 1.25E-01 | transcription_start_site | - | 26171 | 26171 | -1652 | 31144 | AN8211 |
| 1413 | CONTIG143 | 27681 | 27965 | 1.63 | 1.25E-01 | transcription_start_site | - | 26023 | 26023 | -1800 | 31145 | AN8211 |
| 1413 | CONTIG143 | 27681 | 27965 | 1.63 | 1.25E-01 | transcription_start_site | - | 23303 | 23303 | -4520 | 31146 | AN8211 |
| 2563 | CONTIG144 | 2716  | 2985  | 1.18 | 1.08E-01 | transcription_start_site | - | 1815  | 1815  | -1035 | 31149 | AN8213 |
| 2563 | CONTIG144 | 2716  | 2985  | 1.18 | 1.08E-01 | transcription_start_site | - | 1608  | 1608  | -1242 | 31150 | AN8213 |
| 2563 | CONTIG144 | 2716  | 2985  | 1.18 | 1.08E-01 | transcription_start_site | + | 2465  | 2465  | 385   | 31152 | AN8214 |
| 2563 | CONTIG144 | 2716  | 2985  | 1.18 | 1.08E-01 | transcription_start_site | + | 3522  | 3522  | -671  | 31153 | AN8214 |
| 2563 | CONTIG144 | 2716  | 2985  | 1.18 | 1.08E-01 | transcription_start_site | + | 2130  | 2130  | 720   | 31151 | AN8214 |
| 2322 | CONTIG144 | 14026 | 14465 | 1.26 | 8.01E-02 | transcription_start_site | + | 17892 | 17892 | -3646 | 31161 | AN8218 |
| 2322 | CONTIG144 | 14026 | 14465 | 1.26 | 8.01E-02 | transcription_start_site | + | 18182 | 18182 | -3936 | 31162 | AN8218 |
| 2322 | CONTIG144 | 14026 | 14465 | 1.26 | 8.01E-02 | transcription_start_site | + | 19043 | 19043 | -4797 | 31163 | AN8218 |
| 297  | CONTIG144 | 23329 | 23630 | 2.76 | 0.00E+00 | transcription_start_site | - | 20611 | 20611 | -2868 | 31164 | AN8219 |
| 297  | CONTIG144 | 23329 | 23630 | 2.76 | 0.00E+00 | transcription_start_site | - | 19536 | 19536 | -3943 | 31165 | AN8219 |
| 297  | CONTIG144 | 23329 | 23630 | 2.76 | 0.00E+00 | transcription_start_site | + | 25254 | 25254 | -1774 | 31166 | AN8220 |
| 297  | CONTIG144 | 23329 | 23630 | 2.76 | 0.00E+00 | transcription_start_site | + | 26046 | 26046 | -2566 | 31167 | AN8220 |
| 297  | CONTIG144 | 23329 | 23630 | 2.76 | 0.00E+00 | transcription_start_site | + | 27065 | 27065 | -3585 | 31168 | AN8221 |
| 297  | CONTIG144 | 23329 | 23630 | 2.76 | 0.00E+00 | transcription_start_site | + | 27514 | 27514 | -4034 | 31169 | AN8221 |
| 297  | CONTIG144 | 23329 | 23630 | 2.76 | 0.00E+00 | transcription_start_site | + | 28015 | 28015 | -4535 | 31170 | AN8221 |
| 2434 | CONTIG144 | 40069 | 40328 | 1.22 | 9.24E-02 | transcription_start_site | - | 37054 | 37054 | -3144 | 31182 | AN8226 |
| 2434 | CONTIG144 | 40069 | 40328 | 1.22 | 9.24E-02 | transcription_start_site | - | 36958 | 36958 | -3240 | 31183 | AN8226 |
| 2434 | CONTIG144 | 40069 | 40328 | 1.22 | 9.24E-02 | transcription_start_site | - | 36223 | 36223 | -3975 | 31184 | AN8226 |
| 2434 | CONTIG144 | 40069 | 40328 | 1.22 | 9.24E-02 | transcription_start_site | + | 43147 | 43147 | -2948 | 31187 | AN8229 |
| 2434 | CONTIG144 | 40069 | 40328 | 1.22 | 9.24E-02 | transcription_start_site | + | 43267 | 43267 | -3068 | 31188 | AN8229 |
| 2434 | CONTIG144 | 40069 | 40328 | 1.22 | 9.24E-02 | transcription_start_site | + | 44055 | 44055 | -3856 | 31189 | AN8229 |
| 901  | CONTIG145 | 7292  | 7711  | 2    | 8.81E-03 | transcription_start_site | - | 6165  | 6165  | -1336 | 31211 | AN8240 |
| 2564 | CONTIG145 | 7967  | 8831  | 1.18 | 1.11E-01 | transcription_start_site | - | 6165  | 6165  | -2234 | 31211 | AN8240 |
| 2564 | CONTIG145 | 7967  | 8831  | 1.18 | 1.11E-01 | transcription_start_site | - | 9161  | 9161  | 762   | 31213 | AN8241 |
| 2564 | CONTIG145 | 7967  | 8831  | 1.18 | 1.11E-01 | transcription_start_site | - | 9751  | 9751  | 1352  | 31212 | AN8241 |
| 2668 | CONTIG145 | 22517 | 23001 | 1.14 | 1.79E-01 | transcription_start_site | - | 20307 | 20307 | -2452 | 31216 | AN8244 |
| 2668 | CONTIG145 | 22517 | 23001 | 1.14 | 1.79E-01 | transcription_start_site | + | 25837 | 25837 | -3078 | 31219 | AN8247 |
| 2668 | CONTIG145 | 22517 | 23001 | 1.14 | 1.79E-01 | transcription_start_site | + | 27865 | 27865 | -5106 | 31220 | AN8248 |
| 62   | CONTIG145 | 40201 | 40552 | 3.37 | 0.00E+00 | transcription_start_site | - | 39722 | 39722 | -654  | 31229 | AN8251 |
| 1314 | CONTIG145 | 38496 | 38900 | 1.68 | 3.08E-02 | transcription_start_site | - | 39722 | 39722 | 1024  | 31229 | AN8251 |
| 2414 | CONTIG145 | 71494 | 71843 | 1.23 | 1.44E-01 | transcription_start_site | + | 74026 | 74026 | -2357 | 31252 | AN8261 |
| 2414 | CONTIG145 | 71494 | 71843 | 1.23 | 1.44E-01 | transcription_start_site | + | 74271 | 74271 | -2602 | 31253 | AN8261 |
| 2414 | CONTIG145 | 71494 | 71843 | 1.23 | 1.44E-01 | transcription_start_site | + | 74377 | 74377 | -2708 | 31254 | AN8261 |
| 594  | CONTIG145 | 75914 | 76254 | 2.32 | 2.22E-03 | transcription_start_site | + | 76385 | 76385 | -301  | 31255 | AN8262 |
| 594  | CONTIG145 | 75914 | 76254 | 2.32 | 2.22E-03 | transcription_start_site | + | 76694 | 76694 | -610  | 31256 | AN8262 |
| 594  | CONTIG145 | 75914 | 76254 | 2.32 | 2.22E-03 | transcription_start_site | + | 76942 | 76942 | -858  | 31257 | AN8262 |
| 594  | CONTIG145 | 75914 | 76254 | 2.32 | 2.22E-03 | transcription_start_site | + | 77490 | 77490 | -1406 | 31258 | AN8262 |
| 2294 | CONTIG145 | 78003 | 78293 | 1.27 | 1.25E-01 | transcription_start_site | + | 77490 | 77490 | 658   | 31258 | AN8262 |
| 2414 | CONTIG145 | 71494 | 71843 | 1.23 | 1.44E-01 | transcription_start_site | + | 76385 | 76385 | -4716 | 31255 | AN8262 |
| 2414 | CONTIG145 | 71494 | 71843 | 1.23 | 1.44E-01 | transcription_start_site | + | 76694 | 76694 | -5025 | 31256 | AN8262 |
| 594  | CONTIG145 | 75914 | 76254 | 2.32 | 2.22E-03 | transcription_start_site | + | 78010 | 78010 | -1926 | 31259 | AN8263 |
| 2294 | CONTIG145 | 78003 | 78293 | 1.27 | 1.25E-01 | transcription_start_site | + | 78010 | 78010 | 138   | 31259 | AN8263 |
| 2413 | CONTIG145 | 88734 | 89378 | 1.23 | 1.28E-01 | transcription_start_site | - | 84420 | 84420 | -4636 | 31262 | AN8265 |
| 2413 | CONTIG145 | 88734 | 89378 | 1.23 | 1.28E-01 | transcription_start_site | - | 84078 | 84078 | -4978 | 31263 | AN8265 |
| 2413 | CONTIG145 | 88734 | 89378 | 1.23 | 1.28E-01 | transcription_start_site | - | 83922 | 83922 | -5134 | 31264 | AN8265 |
| 2413 | CONTIG145 | 88734 | 89378 | 1.23 | 1.28E-01 | transcription_start_site | - | 83804 | 83804 | -5252 | 31265 | AN8265 |
| 2136 | CONTIG145 | 90229 | 90968 | 1.32 | 8.36E-02 | transcription_start_site | - | 87978 | 87978 | -2620 | 31268 | AN8266 |

|      |           |        |        |      |          |                          |   |        |        |       |       |        |
|------|-----------|--------|--------|------|----------|--------------------------|---|--------|--------|-------|-------|--------|
| 2413 | CONTIG145 | 88734  | 89378  | 1.23 | 1.28E-01 | transcription_start_site | - | 87978  | 87978  | -1078 | 31268 | AN8266 |
| 2136 | CONTIG145 | 90229  | 90968  | 1.32 | 8.36E-02 | transcription_start_site | + | 89916  | 89916  | 682   | 31270 | AN8267 |
| 2136 | CONTIG145 | 90229  | 90968  | 1.32 | 8.36E-02 | transcription_start_site | + | 89805  | 89805  | 793   | 31269 | AN8267 |
| 2413 | CONTIG145 | 88734  | 89378  | 1.23 | 1.28E-01 | transcription_start_site | + | 89805  | 89805  | -749  | 31269 | AN8267 |
| 2413 | CONTIG145 | 88734  | 89378  | 1.23 | 1.28E-01 | transcription_start_site | + | 89916  | 89916  | -860  | 31270 | AN8267 |
| 2136 | CONTIG145 | 90229  | 90968  | 1.32 | 8.36E-02 | transcription_start_site | + | 91385  | 91385  | -786  | 31271 | AN8268 |
| 2136 | CONTIG145 | 90229  | 90968  | 1.32 | 8.36E-02 | transcription_start_site | + | 91758  | 91758  | -1159 | 31272 | AN8268 |
| 2136 | CONTIG145 | 90229  | 90968  | 1.32 | 8.36E-02 | transcription_start_site | + | 92789  | 92789  | -2190 | 31273 | AN8268 |
| 2413 | CONTIG145 | 88734  | 89378  | 1.23 | 1.28E-01 | transcription_start_site | + | 91385  | 91385  | -2329 | 31271 | AN8268 |
| 2413 | CONTIG145 | 88734  | 89378  | 1.23 | 1.28E-01 | transcription_start_site | + | 91758  | 91758  | -2702 | 31272 | AN8268 |
| 2413 | CONTIG145 | 88734  | 89378  | 1.23 | 1.28E-01 | transcription_start_site | + | 92789  | 92789  | -3733 | 31273 | AN8268 |
| 2136 | CONTIG145 | 90229  | 90968  | 1.32 | 8.36E-02 | transcription_start_site | + | 94836  | 94836  | -4237 | 31274 | AN8269 |
| 2136 | CONTIG145 | 90229  | 90968  | 1.32 | 8.36E-02 | transcription_start_site | + | 95153  | 95153  | -4554 | 31275 | AN8269 |
| 627  | CONTIG145 | 101418 | 102202 | 2.27 | 0.00E+00 | transcription_start_site | - | 100378 | 100378 | -1432 | 31276 | AN8270 |
| 627  | CONTIG145 | 101418 | 102202 | 2.27 | 0.00E+00 | transcription_start_site | - | 99383  | 99383  | -2427 | 31277 | AN8270 |
| 627  | CONTIG145 | 101418 | 102202 | 2.27 | 0.00E+00 | transcription_start_site | - | 99080  | 99080  | -2730 | 31278 | AN8270 |
| 1576 | CONTIG145 | 100143 | 101002 | 1.55 | 3.08E-02 | transcription_start_site | - | 100378 | 100378 | -194  | 31276 | AN8270 |
| 1576 | CONTIG145 | 100143 | 101002 | 1.55 | 3.08E-02 | transcription_start_site | - | 99383  | 99383  | -1189 | 31277 | AN8270 |
| 1576 | CONTIG145 | 100143 | 101002 | 1.55 | 3.08E-02 | transcription_start_site | - | 99080  | 99080  | -1492 | 31278 | AN8270 |
| 2041 | CONTIG145 | 103508 | 103852 | 1.36 | 7.51E-02 | transcription_start_site | - | 100378 | 100378 | -3302 | 31276 | AN8270 |
| 2041 | CONTIG145 | 103508 | 103852 | 1.36 | 7.51E-02 | transcription_start_site | - | 99383  | 99383  | -4297 | 31277 | AN8270 |
| 2041 | CONTIG145 | 103508 | 103852 | 1.36 | 7.51E-02 | transcription_start_site | - | 99080  | 99080  | -4600 | 31278 | AN8270 |
| 627  | CONTIG145 | 101418 | 102202 | 2.27 | 0.00E+00 | transcription_start_site | + | 102406 | 102406 | -596  | 31279 | AN8271 |
| 627  | CONTIG145 | 101418 | 102202 | 2.27 | 0.00E+00 | transcription_start_site | + | 103027 | 103027 | -1217 | 31280 | AN8271 |
| 1576 | CONTIG145 | 100143 | 101002 | 1.55 | 3.08E-02 | transcription_start_site | + | 102406 | 102406 | -1833 | 31279 | AN8271 |
| 1576 | CONTIG145 | 100143 | 101002 | 1.55 | 3.08E-02 | transcription_start_site | + | 103027 | 103027 | -2454 | 31280 | AN8271 |
| 2041 | CONTIG145 | 103508 | 103852 | 1.36 | 7.51E-02 | transcription_start_site | + | 103027 | 103027 | 653   | 31280 | AN8271 |
| 662  | CONTIG145 | 112068 | 112503 | 2.23 | 3.61E-03 | transcription_start_site | - | 107253 | 107253 | -5032 | 31281 | AN8272 |
| 662  | CONTIG145 | 112068 | 112503 | 2.23 | 3.61E-03 | transcription_start_site | - | 107177 | 107177 | -5108 | 31282 | AN8272 |
| 2669 | CONTIG145 | 108753 | 109252 | 1.14 | 1.93E-01 | transcription_start_site | - | 107253 | 107253 | -1749 | 31281 | AN8272 |
| 2669 | CONTIG145 | 108753 | 109252 | 1.14 | 1.93E-01 | transcription_start_site | - | 107177 | 107177 | -1825 | 31282 | AN8272 |
| 2669 | CONTIG145 | 108753 | 109252 | 1.14 | 1.93E-01 | transcription_start_site | - | 107049 | 107049 | -1953 | 31283 | AN8272 |
| 2669 | CONTIG145 | 108753 | 109252 | 1.14 | 1.93E-01 | transcription_start_site | - | 106184 | 106184 | -2818 | 31284 | AN8272 |
| 2041 | CONTIG145 | 103508 | 103852 | 1.36 | 7.51E-02 | transcription_start_site | + | 107697 | 107697 | -4017 | 31285 | AN8273 |
| 2041 | CONTIG145 | 103508 | 103852 | 1.36 | 7.51E-02 | transcription_start_site | + | 108041 | 108041 | -4361 | 31286 | AN8273 |
| 2041 | CONTIG145 | 103508 | 103852 | 1.36 | 7.51E-02 | transcription_start_site | + | 108278 | 108278 | -4598 | 31287 | AN8273 |
| 2669 | CONTIG145 | 108753 | 109252 | 1.14 | 1.93E-01 | transcription_start_site | + | 109191 | 109191 | -188  | 31288 | AN8273 |
| 2669 | CONTIG145 | 108753 | 109252 | 1.14 | 1.93E-01 | transcription_start_site | + | 108278 | 108278 | 724   | 31287 | AN8273 |
| 2669 | CONTIG145 | 108753 | 109252 | 1.14 | 1.93E-01 | transcription_start_site | + | 108041 | 108041 | 961   | 31286 | AN8273 |
| 662  | CONTIG145 | 112068 | 112503 | 2.23 | 3.61E-03 | transcription_start_site | - | 111814 | 111814 | -471  | 31289 | AN8274 |
| 662  | CONTIG145 | 112068 | 112503 | 2.23 | 3.61E-03 | transcription_start_site | - | 111683 | 111683 | -602  | 31290 | AN8274 |
| 662  | CONTIG145 | 112068 | 112503 | 2.23 | 3.61E-03 | transcription_start_site | - | 111607 | 111607 | -678  | 31291 | AN8274 |
| 662  | CONTIG145 | 112068 | 112503 | 2.23 | 3.61E-03 | transcription_start_site | - | 111534 | 111534 | -751  | 31292 | AN8274 |
| 662  | CONTIG145 | 112068 | 112503 | 2.23 | 3.61E-03 | transcription_start_site | - | 111350 | 111350 | -935  | 31293 | AN8274 |
| 662  | CONTIG145 | 112068 | 112503 | 2.23 | 3.61E-03 | transcription_start_site | - | 110547 | 110547 | -1738 | 31294 | AN8274 |
| 998  | CONTIG145 | 114908 | 115252 | 1.91 | 5.41E-03 | transcription_start_site | - | 111814 | 111814 | -3266 | 31289 | AN8274 |
| 998  | CONTIG145 | 114908 | 115252 | 1.91 | 5.41E-03 | transcription_start_site | - | 111683 | 111683 | -3397 | 31290 | AN8274 |
| 998  | CONTIG145 | 114908 | 115252 | 1.91 | 5.41E-03 | transcription_start_site | - | 111607 | 111607 | -3473 | 31291 | AN8274 |
| 998  | CONTIG145 | 114908 | 115252 | 1.91 | 5.41E-03 | transcription_start_site | - | 111534 | 111534 | -3546 | 31292 | AN8274 |
| 998  | CONTIG145 | 114908 | 115252 | 1.91 | 5.41E-03 | transcription_start_site | - | 111350 | 111350 | -3730 | 31293 | AN8274 |
| 998  | CONTIG145 | 114908 | 115252 | 1.91 | 5.41E-03 | transcription_start_site | - | 110547 | 110547 | -4533 | 31294 | AN8274 |
| 662  | CONTIG145 | 112068 | 112503 | 2.23 | 3.61E-03 | transcription_start_site | - | 113037 | 113037 | 751   | 31302 | AN8275 |
| 662  | CONTIG145 | 112068 | 112503 | 2.23 | 3.61E-03 | transcription_start_site | - | 113391 | 113391 | 1105  | 31301 | AN8275 |
| 998  | CONTIG145 | 114908 | 115252 | 1.91 | 5.41E-03 | transcription_start_site | - | 114700 | 114700 | -380  | 31295 | AN8275 |
| 998  | CONTIG145 | 114908 | 115252 | 1.91 | 5.41E-03 | transcription_start_site | - | 114510 | 114510 | -570  | 31296 | AN8275 |
| 998  | CONTIG145 | 114908 | 115252 | 1.91 | 5.41E-03 | transcription_start_site | - | 114380 | 114380 | -700  | 31297 | AN8275 |
| 998  | CONTIG145 | 114908 | 115252 | 1.91 | 5.41E-03 | transcription_start_site | - | 114231 | 114231 | -849  | 31298 | AN8275 |



|                |        |        |      |          |                          |   |        |        |       |       |        |
|----------------|--------|--------|------|----------|--------------------------|---|--------|--------|-------|-------|--------|
| 998 CONTIG145  | 114908 | 115252 | 1.91 | 5.41E-03 | transcription_start_site | - | 114132 | 114132 | -948  | 31299 | AN8275 |
| 998 CONTIG145  | 114908 | 115252 | 1.91 | 5.41E-03 | transcription_start_site | - | 114021 | 114021 | -1059 | 31300 | AN8275 |
| 998 CONTIG145  | 114908 | 115252 | 1.91 | 5.41E-03 | transcription_start_site | - | 113391 | 113391 | -1689 | 31301 | AN8275 |
| 998 CONTIG145  | 114908 | 115252 | 1.91 | 5.41E-03 | transcription_start_site | - | 113037 | 113037 | -2043 | 31302 | AN8275 |
| 2415 CONTIG145 | 117088 | 117817 | 1.23 | 1.44E-01 | transcription_start_site | - | 114700 | 114700 | -2752 | 31295 | AN8275 |
| 2415 CONTIG145 | 117088 | 117817 | 1.23 | 1.44E-01 | transcription_start_site | - | 114510 | 114510 | -2942 | 31296 | AN8275 |
| 2415 CONTIG145 | 117088 | 117817 | 1.23 | 1.44E-01 | transcription_start_site | - | 114380 | 114380 | -3072 | 31297 | AN8275 |
| 2415 CONTIG145 | 117088 | 117817 | 1.23 | 1.44E-01 | transcription_start_site | - | 114231 | 114231 | -3221 | 31298 | AN8275 |
| 2415 CONTIG145 | 117088 | 117817 | 1.23 | 1.44E-01 | transcription_start_site | - | 114132 | 114132 | -3320 | 31299 | AN8275 |
| 2415 CONTIG145 | 117088 | 117817 | 1.23 | 1.44E-01 | transcription_start_site | - | 114021 | 114021 | -3431 | 31300 | AN8275 |
| 2415 CONTIG145 | 117088 | 117817 | 1.23 | 1.44E-01 | transcription_start_site | - | 113391 | 113391 | -4061 | 31301 | AN8275 |
| 2415 CONTIG145 | 117088 | 117817 | 1.23 | 1.44E-01 | transcription_start_site | - | 113037 | 113037 | -4415 | 31302 | AN8275 |
| 662 CONTIG145  | 112068 | 112503 | 2.23 | 3.61E-03 | transcription_start_site | + | 116086 | 116086 | -3800 | 31303 | AN8276 |
| 662 CONTIG145  | 112068 | 112503 | 2.23 | 3.61E-03 | transcription_start_site | + | 116272 | 116272 | -3986 | 31304 | AN8276 |
| 662 CONTIG145  | 112068 | 112503 | 2.23 | 3.61E-03 | transcription_start_site | + | 116751 | 116751 | -4465 | 31305 | AN8276 |
| 662 CONTIG145  | 112068 | 112503 | 2.23 | 3.61E-03 | transcription_start_site | + | 116993 | 116993 | -4707 | 31306 | AN8276 |
| 998 CONTIG145  | 114908 | 115252 | 1.91 | 5.41E-03 | transcription_start_site | + | 116086 | 116086 | -1006 | 31303 | AN8276 |
| 998 CONTIG145  | 114908 | 115252 | 1.91 | 5.41E-03 | transcription_start_site | + | 116272 | 116272 | -1192 | 31304 | AN8276 |
| 998 CONTIG145  | 114908 | 115252 | 1.91 | 5.41E-03 | transcription_start_site | + | 116751 | 116751 | -1671 | 31305 | AN8276 |
| 998 CONTIG145  | 114908 | 115252 | 1.91 | 5.41E-03 | transcription_start_site | + | 116993 | 116993 | -1913 | 31306 | AN8276 |
| 2415 CONTIG145 | 117088 | 117817 | 1.23 | 1.44E-01 | transcription_start_site | + | 116993 | 116993 | 459   | 31306 | AN8276 |
| 2415 CONTIG145 | 117088 | 117817 | 1.23 | 1.44E-01 | transcription_start_site | + | 116751 | 116751 | 701   | 31305 | AN8276 |
| 2415 CONTIG145 | 117088 | 117817 | 1.23 | 1.44E-01 | transcription_start_site | + | 116272 | 116272 | 1180  | 31304 | AN8276 |
| 264 CONTIG145  | 123545 | 123969 | 2.82 | 2.67E-04 | transcription_start_site | - | 121167 | 121167 | -2590 | 31307 | AN8277 |
| 264 CONTIG145  | 123545 | 123969 | 2.82 | 2.67E-04 | transcription_start_site | - | 121060 | 121060 | -2697 | 31308 | AN8277 |
| 264 CONTIG145  | 123545 | 123969 | 2.82 | 2.67E-04 | transcription_start_site | - | 120945 | 120945 | -2812 | 31309 | AN8277 |
| 264 CONTIG145  | 123545 | 123969 | 2.82 | 2.67E-04 | transcription_start_site | - | 120799 | 120799 | -2958 | 31310 | AN8277 |
| 264 CONTIG145  | 123545 | 123969 | 2.82 | 2.67E-04 | transcription_start_site | - | 120391 | 120391 | -3366 | 31311 | AN8277 |
| 264 CONTIG145  | 123545 | 123969 | 2.82 | 2.67E-04 | transcription_start_site | - | 119764 | 119764 | -3993 | 31312 | AN8277 |
| 459 CONTIG145  | 122705 | 123434 | 2.5  | 0.00E+00 | transcription_start_site | - | 121167 | 121167 | -1902 | 31307 | AN8277 |
| 459 CONTIG145  | 122705 | 123434 | 2.5  | 0.00E+00 | transcription_start_site | - | 121060 | 121060 | -2009 | 31308 | AN8277 |
| 459 CONTIG145  | 122705 | 123434 | 2.5  | 0.00E+00 | transcription_start_site | - | 120945 | 120945 | -2124 | 31309 | AN8277 |
| 459 CONTIG145  | 122705 | 123434 | 2.5  | 0.00E+00 | transcription_start_site | - | 120799 | 120799 | -2270 | 31310 | AN8277 |
| 459 CONTIG145  | 122705 | 123434 | 2.5  | 0.00E+00 | transcription_start_site | - | 120391 | 120391 | -2678 | 31311 | AN8277 |
| 459 CONTIG145  | 122705 | 123434 | 2.5  | 0.00E+00 | transcription_start_site | - | 119764 | 119764 | -3305 | 31312 | AN8277 |
| 264 CONTIG145  | 123545 | 123969 | 2.82 | 2.67E-04 | transcription_start_site | + | 122837 | 122837 | 920   | 31315 | AN8278 |
| 459 CONTIG145  | 122705 | 123434 | 2.5  | 0.00E+00 | transcription_start_site | + | 122837 | 122837 | 232   | 31315 | AN8278 |
| 459 CONTIG145  | 122705 | 123434 | 2.5  | 0.00E+00 | transcription_start_site | + | 122495 | 122495 | 574   | 31314 | AN8278 |
| 459 CONTIG145  | 122705 | 123434 | 2.5  | 0.00E+00 | transcription_start_site | + | 122358 | 122358 | 711   | 31313 | AN8278 |
| 2415 CONTIG145 | 117088 | 117817 | 1.23 | 1.44E-01 | transcription_start_site | + | 122358 | 122358 | -4905 | 31313 | AN8278 |
| 2415 CONTIG145 | 117088 | 117817 | 1.23 | 1.44E-01 | transcription_start_site | + | 122495 | 122495 | -5042 | 31314 | AN8278 |
| 264 CONTIG145  | 123545 | 123969 | 2.82 | 2.67E-04 | transcription_start_site | + | 124445 | 124445 | -688  | 31316 | AN8279 |
| 264 CONTIG145  | 123545 | 123969 | 2.82 | 2.67E-04 | transcription_start_site | + | 124715 | 124715 | -958  | 31317 | AN8279 |
| 264 CONTIG145  | 123545 | 123969 | 2.82 | 2.67E-04 | transcription_start_site | + | 125187 | 125187 | -1430 | 31318 | AN8279 |
| 264 CONTIG145  | 123545 | 123969 | 2.82 | 2.67E-04 | transcription_start_site | + | 125610 | 125610 | -1853 | 31319 | AN8279 |
| 459 CONTIG145  | 122705 | 123434 | 2.5  | 0.00E+00 | transcription_start_site | + | 124445 | 124445 | -1375 | 31316 | AN8279 |
| 459 CONTIG145  | 122705 | 123434 | 2.5  | 0.00E+00 | transcription_start_site | + | 124715 | 124715 | -1645 | 31317 | AN8279 |
| 459 CONTIG145  | 122705 | 123434 | 2.5  | 0.00E+00 | transcription_start_site | + | 125187 | 125187 | -2117 | 31318 | AN8279 |
| 459 CONTIG145  | 122705 | 123434 | 2.5  | 0.00E+00 | transcription_start_site | + | 125610 | 125610 | -2540 | 31319 | AN8279 |
| 264 CONTIG145  | 123545 | 123969 | 2.82 | 2.67E-04 | transcription_start_site | + | 127359 | 127359 | -3602 | 31320 | AN8280 |
| 264 CONTIG145  | 123545 | 123969 | 2.82 | 2.67E-04 | transcription_start_site | + | 127596 | 127596 | -3839 | 31321 | AN8280 |
| 264 CONTIG145  | 123545 | 123969 | 2.82 | 2.67E-04 | transcription_start_site | + | 127897 | 127897 | -4140 | 31322 | AN8280 |
| 459 CONTIG145  | 122705 | 123434 | 2.5  | 0.00E+00 | transcription_start_site | + | 127359 | 127359 | -4289 | 31320 | AN8280 |
| 459 CONTIG145  | 122705 | 123434 | 2.5  | 0.00E+00 | transcription_start_site | + | 127596 | 127596 | -4526 | 31321 | AN8280 |
| 459 CONTIG145  | 122705 | 123434 | 2.5  | 0.00E+00 | transcription_start_site | + | 127897 | 127897 | -4827 | 31322 | AN8280 |
| 1383 CONTIG145 | 131851 | 132136 | 1.64 | 3.70E-02 | transcription_start_site | - | 132043 | 132043 | 49    | 31325 | AN8281 |
| 1383 CONTIG145 | 131851 | 132136 | 1.64 | 3.70E-02 | transcription_start_site | - | 132190 | 132190 | 196   | 31324 | AN8281 |

|      |           |        |        |      |          |                          |   |        |        |       |       |        |
|------|-----------|--------|--------|------|----------|--------------------------|---|--------|--------|-------|-------|--------|
| 1793 | CONTIG145 | 130726 | 131225 | 1.46 | 6.84E-02 | transcription_start_site | - | 132043 | 132043 | 1067  | 31325 | AN8281 |
| 1793 | CONTIG145 | 130726 | 131225 | 1.46 | 6.84E-02 | transcription_start_site | - | 132190 | 132190 | 1214  | 31324 | AN8281 |
| 3016 | CONTIG146 | 9532   | 9976   | 0.89 | 1.08E-01 | transcription_start_site | + | 10571  | 10571  | -817  | 31363 | AN8294 |
| 3016 | CONTIG146 | 9532   | 9976   | 0.89 | 1.08E-01 | transcription_start_site | + | 10798  | 10798  | -1044 | 31364 | AN8294 |
| 3016 | CONTIG146 | 9532   | 9976   | 0.89 | 1.08E-01 | transcription_start_site | + | 10874  | 10874  | -1120 | 31365 | AN8294 |
| 3016 | CONTIG146 | 9532   | 9976   | 0.89 | 1.08E-01 | transcription_start_site | + | 11176  | 11176  | -1422 | 31366 | AN8294 |
| 3040 | CONTIG146 | 7506   | 8090   | 0.8  | 1.66E-01 | transcription_start_site | + | 10571  | 10571  | -2773 | 31363 | AN8294 |
| 3040 | CONTIG146 | 7506   | 8090   | 0.8  | 1.66E-01 | transcription_start_site | + | 10798  | 10798  | -3000 | 31364 | AN8294 |
| 3040 | CONTIG146 | 7506   | 8090   | 0.8  | 1.66E-01 | transcription_start_site | + | 10874  | 10874  | -3076 | 31365 | AN8294 |
| 3040 | CONTIG146 | 7506   | 8090   | 0.8  | 1.66E-01 | transcription_start_site | + | 11176  | 11176  | -3378 | 31366 | AN8294 |
| 2995 | CONTIG149 | 11857  | 12891  | 0.92 | 8.36E-02 | transcription_start_site | - | 12911  | 12911  | 537   | 31394 | AN8300 |
| 2995 | CONTIG149 | 11857  | 12891  | 0.92 | 8.36E-02 | transcription_start_site | - | 11598  | 11598  | -776  | 31395 | AN8300 |
| 2397 | CONTIG149 | 28051  | 28790  | 1.23 | 1.05E-02 | transcription_start_site | - | 24704  | 24704  | -3716 | 31406 | AN8302 |
| 2397 | CONTIG149 | 28051  | 28790  | 1.23 | 1.05E-02 | transcription_start_site | - | 24244  | 24244  | -4176 | 31407 | AN8302 |
| 2397 | CONTIG149 | 28051  | 28790  | 1.23 | 1.05E-02 | transcription_start_site | + | 27597  | 27597  | 823   | 31417 | AN8303 |
| 2397 | CONTIG149 | 28051  | 28790  | 1.23 | 1.05E-02 | transcription_start_site | + | 27438  | 27438  | 982   | 31416 | AN8303 |
| 2397 | CONTIG149 | 28051  | 28790  | 1.23 | 1.05E-02 | transcription_start_site | + | 27280  | 27280  | 1140  | 31415 | AN8303 |
| 2397 | CONTIG149 | 28051  | 28790  | 1.23 | 1.05E-02 | transcription_start_site | - | 29344  | 29344  | 923   | 31421 | AN8304 |
| 2700 | CONTIG150 | 23044  | 23303  | 1.12 | 5.88E-02 | transcription_start_site | - | 19214  | 19214  | -3959 | 31432 | AN8310 |
| 2700 | CONTIG150 | 23044  | 23303  | 1.12 | 5.88E-02 | transcription_start_site | - | 19030  | 19030  | -4143 | 31433 | AN8310 |
| 2700 | CONTIG150 | 23044  | 23303  | 1.12 | 5.88E-02 | transcription_start_site | - | 18787  | 18787  | -4386 | 31434 | AN8310 |
| 2700 | CONTIG150 | 23044  | 23303  | 1.12 | 5.88E-02 | transcription_start_site | - | 22760  | 22760  | -413  | 31435 | AN8311 |
| 2700 | CONTIG150 | 23044  | 23303  | 1.12 | 5.88E-02 | transcription_start_site | - | 22310  | 22310  | -863  | 31436 | AN8311 |
| 3020 | CONTIG150 | 43804  | 44388  | 0.88 | 1.66E-01 | transcription_start_site | - | 40554  | 40554  | -3542 | 31445 | AN8314 |
| 3020 | CONTIG150 | 43804  | 44388  | 0.88 | 1.66E-01 | transcription_start_site | - | 40243  | 40243  | -3853 | 31446 | AN8314 |
| 3020 | CONTIG150 | 43804  | 44388  | 0.88 | 1.66E-01 | transcription_start_site | - | 39733  | 39733  | -4363 | 31447 | AN8314 |
| 3020 | CONTIG150 | 43804  | 44388  | 0.88 | 1.66E-01 | transcription_start_site | - | 45257  | 45257  | 1161  | 31466 | AN8316 |
| 3020 | CONTIG150 | 43804  | 44388  | 0.88 | 1.66E-01 | transcription_start_site | + | 49113  | 49113  | -5017 | 31479 | AN8318 |
| 2821 | CONTIG150 | 54765  | 55267  | 1.05 | 8.01E-02 | transcription_start_site | - | 53957  | 53957  | -1059 | 31487 | AN8320 |
| 2821 | CONTIG150 | 54765  | 55267  | 1.05 | 8.01E-02 | transcription_start_site | - | 53867  | 53867  | -1149 | 31488 | AN8320 |
| 2821 | CONTIG150 | 54765  | 55267  | 1.05 | 8.01E-02 | transcription_start_site | + | 54981  | 54981  | 35    | 31489 | AN8321 |
| 2821 | CONTIG150 | 54765  | 55267  | 1.05 | 8.01E-02 | transcription_start_site | + | 55276  | 55276  | -260  | 31490 | AN8321 |
| 2821 | CONTIG150 | 54765  | 55267  | 1.05 | 8.01E-02 | transcription_start_site | + | 55573  | 55573  | -557  | 31491 | AN8321 |
| 2821 | CONTIG150 | 54765  | 55267  | 1.05 | 8.01E-02 | transcription_start_site | + | 55790  | 55790  | -774  | 31492 | AN8321 |
| 2961 | CONTIG150 | 80781  | 81125  | 0.95 | 1.25E-01 | transcription_start_site | + | 80826  | 80826  | 127   | 31513 | AN8327 |
| 2961 | CONTIG150 | 80781  | 81125  | 0.95 | 1.25E-01 | transcription_start_site | + | 80524  | 80524  | 429   | 31512 | AN8327 |
| 2961 | CONTIG150 | 80781  | 81125  | 0.95 | 1.25E-01 | transcription_start_site | + | 81433  | 81433  | -480  | 31514 | AN8327 |
| 2961 | CONTIG150 | 80781  | 81125  | 0.95 | 1.25E-01 | transcription_start_site | + | 81568  | 81568  | -615  | 31515 | AN8327 |
| 3019 | CONTIG150 | 85736  | 86675  | 0.88 | 1.59E-01 | transcription_start_site | - | 83506  | 83506  | -2699 | 31516 | AN8328 |
| 3019 | CONTIG150 | 85736  | 86675  | 0.88 | 1.59E-01 | transcription_start_site | - | 83139  | 83139  | -3066 | 31517 | AN8328 |
| 3019 | CONTIG150 | 85736  | 86675  | 0.88 | 1.59E-01 | transcription_start_site | - | 82645  | 82645  | -3560 | 31518 | AN8328 |
| 2961 | CONTIG150 | 80781  | 81125  | 0.95 | 1.25E-01 | transcription_start_site | + | 84369  | 84369  | -3416 | 31519 | AN8329 |
| 2961 | CONTIG150 | 80781  | 81125  | 0.95 | 1.25E-01 | transcription_start_site | + | 84695  | 84695  | -3742 | 31520 | AN8329 |
| 2961 | CONTIG150 | 80781  | 81125  | 0.95 | 1.25E-01 | transcription_start_site | + | 85381  | 85381  | -4428 | 31521 | AN8329 |
| 3019 | CONTIG150 | 85736  | 86675  | 0.88 | 1.59E-01 | transcription_start_site | + | 85381  | 85381  | 824   | 31521 | AN8329 |
| 3019 | CONTIG150 | 85736  | 86675  | 0.88 | 1.59E-01 | transcription_start_site | + | 86542  | 86542  | -336  | 31522 | AN8330 |
| 494  | CONTIG150 | 98926  | 99285  | 2.45 | 0.00E+00 | transcription_start_site | + | 99147  | 99147  | -41   | 31533 | AN8335 |
| 2962 | CONTIG150 | 104251 | 104620 | 0.95 | 1.25E-01 | transcription_start_site | - | 101279 | 101279 | -3156 | 31534 | AN8336 |
| 2962 | CONTIG150 | 104251 | 104620 | 0.95 | 1.25E-01 | transcription_start_site | - | 100986 | 100986 | -3449 | 31535 | AN8336 |
| 2962 | CONTIG150 | 104251 | 104620 | 0.95 | 1.25E-01 | transcription_start_site | - | 100718 | 100718 | -3717 | 31536 | AN8336 |
| 494  | CONTIG150 | 98926  | 99285  | 2.45 | 0.00E+00 | transcription_start_site | + | 103918 | 103918 | -4812 | 31537 | AN8337 |
| 2962 | CONTIG150 | 104251 | 104620 | 0.95 | 1.25E-01 | transcription_start_site | + | 103918 | 103918 | 517   | 31537 | AN8337 |
| 2962 | CONTIG150 | 104251 | 104620 | 0.95 | 1.25E-01 | transcription_start_site | + | 105434 | 105434 | -998  | 31538 | AN8338 |
| 2962 | CONTIG150 | 104251 | 104620 | 0.95 | 1.25E-01 | transcription_start_site | + | 106101 | 106101 | -1665 | 31539 | AN8338 |
| 2962 | CONTIG150 | 104251 | 104620 | 0.95 | 1.25E-01 | transcription_start_site | + | 106481 | 106481 | -2045 | 31540 | AN8338 |
| 2962 | CONTIG150 | 104251 | 104620 | 0.95 | 1.25E-01 | transcription_start_site | + | 106671 | 106671 | -2235 | 31541 | AN8338 |
| 2962 | CONTIG150 | 104251 | 104620 | 0.95 | 1.25E-01 | transcription_start_site | + | 107125 | 107125 | -2689 | 31542 | AN8338 |

|      |           |        |        |      |          |                          |   |        |        |       |       |        |
|------|-----------|--------|--------|------|----------|--------------------------|---|--------|--------|-------|-------|--------|
| 325  | CONTIG150 | 108771 | 109100 | 2.72 | 0.00E+00 | transcription_start_site | - | 108629 | 108629 | -306  | 31543 | AN8339 |
| 2442 | CONTIG151 | 12092  | 12591  | 1.22 | 1.33E-01 | transcription_start_site | - | 7511   | 7511   | -4830 | 31558 | AN8343 |
| 2442 | CONTIG151 | 12092  | 12591  | 1.22 | 1.33E-01 | transcription_start_site | - | 7214   | 7214   | -5127 | 31559 | AN8343 |
| 2442 | CONTIG151 | 12092  | 12591  | 1.22 | 1.33E-01 | transcription_start_site | - | 12505  | 12505  | 163   | 31560 | AN8344 |
| 2442 | CONTIG151 | 12092  | 12591  | 1.22 | 1.33E-01 | transcription_start_site | - | 11432  | 11432  | -909  | 31561 | AN8344 |
| 2442 | CONTIG151 | 12092  | 12591  | 1.22 | 1.33E-01 | transcription_start_site | - | 9848   | 9848   | -2493 | 31562 | AN8344 |
| 2442 | CONTIG151 | 12092  | 12591  | 1.22 | 1.33E-01 | transcription_start_site | - | 8854   | 8854   | -3487 | 31563 | AN8344 |
| 2442 | CONTIG151 | 12092  | 12591  | 1.22 | 1.33E-01 | transcription_start_site | - | 8555   | 8555   | -3786 | 31564 | AN8344 |
| 2442 | CONTIG151 | 12092  | 12591  | 1.22 | 1.33E-01 | transcription_start_site | + | 12916  | 12916  | -574  | 31565 | AN8345 |
| 2442 | CONTIG151 | 12092  | 12591  | 1.22 | 1.33E-01 | transcription_start_site | + | 12996  | 12996  | -654  | 31566 | AN8345 |
| 2442 | CONTIG151 | 12092  | 12591  | 1.22 | 1.33E-01 | transcription_start_site | + | 13065  | 13065  | -723  | 31567 | AN8345 |
| 2442 | CONTIG151 | 12092  | 12591  | 1.22 | 1.33E-01 | transcription_start_site | + | 13213  | 13213  | -871  | 31568 | AN8345 |
| 2442 | CONTIG151 | 12092  | 12591  | 1.22 | 1.33E-01 | transcription_start_site | + | 13443  | 13443  | -1101 | 31569 | AN8345 |
| 2442 | CONTIG151 | 12092  | 12591  | 1.22 | 1.33E-01 | transcription_start_site | + | 13720  | 13720  | -1378 | 31570 | AN8345 |
| 2442 | CONTIG151 | 12092  | 12591  | 1.22 | 1.33E-01 | transcription_start_site | + | 14061  | 14061  | -1719 | 31571 | AN8345 |
| 2442 | CONTIG151 | 12092  | 12591  | 1.22 | 1.33E-01 | transcription_start_site | + | 14867  | 14867  | -2525 | 31572 | AN8345 |
| 2442 | CONTIG151 | 12092  | 12591  | 1.22 | 1.33E-01 | transcription_start_site | + | 16808  | 16808  | -4466 | 31573 | AN8346 |
| 75   | CONTIG151 | 40142  | 40416  | 3.3  | 0.00E+00 | transcription_start_site | - | 36108  | 36108  | -4171 | 31601 | AN8354 |
| 75   | CONTIG151 | 40142  | 40416  | 3.3  | 0.00E+00 | transcription_start_site | - | 36016  | 36016  | -4263 | 31602 | AN8354 |
| 75   | CONTIG151 | 40142  | 40416  | 3.3  | 0.00E+00 | transcription_start_site | - | 35552  | 35552  | -4727 | 31603 | AN8354 |
| 75   | CONTIG151 | 40142  | 40416  | 3.3  | 0.00E+00 | transcription_start_site | - | 39540  | 39540  | -739  | 31606 | AN8356 |
| 75   | CONTIG151 | 40142  | 40416  | 3.3  | 0.00E+00 | transcription_start_site | - | 39279  | 39279  | -1000 | 31607 | AN8356 |
| 75   | CONTIG151 | 40142  | 40416  | 3.3  | 0.00E+00 | transcription_start_site | + | 40507  | 40507  | -228  | 31608 | AN8357 |
| 75   | CONTIG151 | 40142  | 40416  | 3.3  | 0.00E+00 | transcription_start_site | + | 40690  | 40690  | -411  | 31609 | AN8357 |
| 75   | CONTIG151 | 40142  | 40416  | 3.3  | 0.00E+00 | transcription_start_site | + | 41494  | 41494  | -1215 | 31610 | AN8357 |
| 75   | CONTIG151 | 40142  | 40416  | 3.3  | 0.00E+00 | transcription_start_site | + | 41865  | 41865  | -1586 | 31611 | AN8357 |
| 75   | CONTIG151 | 40142  | 40416  | 3.3  | 0.00E+00 | transcription_start_site | + | 41994  | 41994  | -1715 | 31612 | AN8357 |
| 75   | CONTIG151 | 40142  | 40416  | 3.3  | 0.00E+00 | transcription_start_site | + | 42355  | 42355  | -2076 | 31613 | AN8357 |
| 75   | CONTIG151 | 40142  | 40416  | 3.3  | 0.00E+00 | transcription_start_site | + | 43199  | 43199  | -2920 | 31614 | AN8358 |
| 75   | CONTIG151 | 40142  | 40416  | 3.3  | 0.00E+00 | transcription_start_site | + | 43421  | 43421  | -3142 | 31615 | AN8358 |
| 75   | CONTIG151 | 40142  | 40416  | 3.3  | 0.00E+00 | transcription_start_site | + | 43692  | 43692  | -3413 | 31616 | AN8358 |
| 75   | CONTIG151 | 40142  | 40416  | 3.3  | 0.00E+00 | transcription_start_site | + | 44586  | 44586  | -4307 | 31617 | AN8358 |
| 1923 | CONTIG151 | 56337  | 56608  | 1.4  | 8.01E-02 | transcription_start_site | - | 56543  | 56543  | 70    | 31628 | AN8362 |
| 1923 | CONTIG151 | 56337  | 56608  | 1.4  | 8.01E-02 | transcription_start_site | - | 55993  | 55993  | -479  | 31629 | AN8362 |
| 1923 | CONTIG151 | 56337  | 56608  | 1.4  | 8.01E-02 | transcription_start_site | + | 57450  | 57450  | -977  | 31630 | AN8363 |
| 1923 | CONTIG151 | 56337  | 56608  | 1.4  | 8.01E-02 | transcription_start_site | + | 58158  | 58158  | -1685 | 31631 | AN8363 |
| 1923 | CONTIG151 | 56337  | 56608  | 1.4  | 8.01E-02 | transcription_start_site | + | 58330  | 58330  | -1857 | 31632 | AN8363 |
| 1923 | CONTIG151 | 56337  | 56608  | 1.4  | 8.01E-02 | transcription_start_site | + | 60298  | 60298  | -3825 | 31633 | AN8364 |
| 1923 | CONTIG151 | 56337  | 56608  | 1.4  | 8.01E-02 | transcription_start_site | + | 60553  | 60553  | -4080 | 31634 | AN8364 |
| 141  | CONTIG151 | 65038  | 65467  | 3.07 | 0.00E+00 | transcription_start_site | - | 64806  | 64806  | -446  | 31635 | AN8365 |
| 141  | CONTIG151 | 65038  | 65467  | 3.07 | 0.00E+00 | transcription_start_site | - | 64474  | 64474  | -778  | 31636 | AN8365 |
| 141  | CONTIG151 | 65038  | 65467  | 3.07 | 0.00E+00 | transcription_start_site | - | 64152  | 64152  | -1100 | 31637 | AN8365 |
| 141  | CONTIG151 | 65038  | 65467  | 3.07 | 0.00E+00 | transcription_start_site | - | 63730  | 63730  | -1522 | 31638 | AN8365 |
| 141  | CONTIG151 | 65038  | 65467  | 3.07 | 0.00E+00 | transcription_start_site | - | 62520  | 62520  | -2732 | 31639 | AN8365 |
| 141  | CONTIG151 | 65038  | 65467  | 3.07 | 0.00E+00 | transcription_start_site | - | 62217  | 62217  | -3035 | 31640 | AN8365 |
| 141  | CONTIG151 | 65038  | 65467  | 3.07 | 0.00E+00 | transcription_start_site | + | 70351  | 70351  | -5098 | 31641 | AN8366 |
| 2166 | CONTIG151 | 70821  | 71170  | 1.31 | 1.08E-01 | transcription_start_site | + | 70351  | 70351  | 644   | 31641 | AN8366 |
| 3056 | CONTIG152 | 8040   | 8379   | 0.72 | 1.25E-01 | transcription_start_site | - | 4953   | 4953   | -3256 | 31642 | AN8367 |
| 3056 | CONTIG152 | 8040   | 8379   | 0.72 | 1.25E-01 | transcription_start_site | - | 4724   | 4724   | -3485 | 31643 | AN8367 |
| 3056 | CONTIG152 | 8040   | 8379   | 0.72 | 1.25E-01 | transcription_start_site | - | 4251   | 4251   | -3958 | 31644 | AN8367 |
| 3068 | CONTIG152 | 4221   | 4720   | 0.64 | 1.93E-01 | transcription_start_site | - | 4251   | 4251   | -219  | 31644 | AN8367 |
| 3068 | CONTIG152 | 4221   | 4720   | 0.64 | 1.93E-01 | transcription_start_site | - | 4724   | 4724   | 253   | 31643 | AN8367 |
| 3068 | CONTIG152 | 4221   | 4720   | 0.64 | 1.93E-01 | transcription_start_site | - | 4953   | 4953   | 482   | 31642 | AN8367 |
| 3056 | CONTIG152 | 8040   | 8379   | 0.72 | 1.25E-01 | transcription_start_site | - | 6754   | 6754   | -1455 | 31645 | AN8368 |
| 3056 | CONTIG152 | 8040   | 8379   | 0.72 | 1.25E-01 | transcription_start_site | - | 6427   | 6427   | -1782 | 31646 | AN8368 |
| 3056 | CONTIG152 | 8040   | 8379   | 0.72 | 1.25E-01 | transcription_start_site | - | 5666   | 5666   | -2543 | 31647 | AN8368 |
| 3068 | CONTIG152 | 4221   | 4720   | 0.64 | 1.93E-01 | transcription_start_site | - | 5666   | 5666   | 1195  | 31647 | AN8368 |

|      |           |       |       |      |          |                          |   |       |       |       |       |        |
|------|-----------|-------|-------|------|----------|--------------------------|---|-------|-------|-------|-------|--------|
| 3056 | CONTIG152 | 8040  | 8379  | 0.72 | 1.25E-01 | transcription_start_site | + | 7869  | 7869  | 340   | 31650 | AN8369 |
| 3056 | CONTIG152 | 8040  | 8379  | 0.72 | 1.25E-01 | transcription_start_site | + | 7718  | 7718  | 491   | 31649 | AN8369 |
| 3056 | CONTIG152 | 8040  | 8379  | 0.72 | 1.25E-01 | transcription_start_site | + | 7598  | 7598  | 611   | 31648 | AN8369 |
| 3056 | CONTIG152 | 8040  | 8379  | 0.72 | 1.25E-01 | transcription_start_site | + | 10743 | 10743 | -2533 | 31651 | AN8369 |
| 3068 | CONTIG152 | 4221  | 4720  | 0.64 | 1.93E-01 | transcription_start_site | + | 7598  | 7598  | -3127 | 31648 | AN8369 |
| 3068 | CONTIG152 | 4221  | 4720  | 0.64 | 1.93E-01 | transcription_start_site | + | 7718  | 7718  | -3247 | 31649 | AN8369 |
| 3068 | CONTIG152 | 4221  | 4720  | 0.64 | 1.93E-01 | transcription_start_site | + | 7869  | 7869  | -3398 | 31650 | AN8369 |
| 2935 | CONTIG152 | 18308 | 18652 | 0.98 | 2.62E-02 | transcription_start_site | + | 18319 | 18319 | 161   | 31655 | AN8370 |
| 2935 | CONTIG152 | 18308 | 18652 | 0.98 | 2.62E-02 | transcription_start_site | + | 18960 | 18960 | -480  | 31656 | AN8370 |
| 2935 | CONTIG152 | 18308 | 18652 | 0.98 | 2.62E-02 | transcription_start_site | + | 17859 | 17859 | 621   | 31654 | AN8370 |
| 2935 | CONTIG152 | 18308 | 18652 | 0.98 | 2.62E-02 | transcription_start_site | + | 19834 | 19834 | -1354 | 31657 | AN8370 |
| 3051 | CONTIG152 | 19058 | 19337 | 0.75 | 1.08E-01 | transcription_start_site | + | 18960 | 18960 | 237   | 31656 | AN8370 |
| 3051 | CONTIG152 | 19058 | 19337 | 0.75 | 1.08E-01 | transcription_start_site | + | 19834 | 19834 | -636  | 31657 | AN8370 |
| 3051 | CONTIG152 | 19058 | 19337 | 0.75 | 1.08E-01 | transcription_start_site | + | 18319 | 18319 | 878   | 31655 | AN8370 |
| 2769 | CONTIG152 | 26858 | 27282 | 1.08 | 5.41E-03 | transcription_start_site | - | 23184 | 23184 | -3886 | 31658 | AN8371 |
| 2769 | CONTIG152 | 26858 | 27282 | 1.08 | 5.41E-03 | transcription_start_site | - | 22909 | 22909 | -4161 | 31659 | AN8371 |
| 2769 | CONTIG152 | 26858 | 27282 | 1.08 | 5.41E-03 | transcription_start_site | - | 22650 | 22650 | -4420 | 31660 | AN8371 |
| 2769 | CONTIG152 | 26858 | 27282 | 1.08 | 5.41E-03 | transcription_start_site | - | 22008 | 22008 | -5062 | 31661 | AN8371 |
| 2769 | CONTIG152 | 26858 | 27282 | 1.08 | 5.41E-03 | transcription_start_site | + | 26842 | 26842 | 228   | 31665 | AN8373 |
| 2769 | CONTIG152 | 26858 | 27282 | 1.08 | 5.41E-03 | transcription_start_site | + | 27558 | 27558 | -488  | 31666 | AN8373 |
| 2769 | CONTIG152 | 26858 | 27282 | 1.08 | 5.41E-03 | transcription_start_site | - | 28069 | 28069 | 999   | 31677 | AN8374 |
| 3029 | CONTIG152 | 50483 | 50752 | 0.85 | 5.88E-02 | transcription_start_site | - | 50655 | 50655 | 37    | 31697 | AN8380 |
| 3029 | CONTIG152 | 50483 | 50752 | 0.85 | 5.88E-02 | transcription_start_site | - | 50403 | 50403 | -214  | 31698 | AN8380 |
| 3029 | CONTIG152 | 50483 | 50752 | 0.85 | 5.88E-02 | transcription_start_site | - | 50361 | 50361 | -256  | 31699 | AN8380 |
| 3029 | CONTIG152 | 50483 | 50752 | 0.85 | 5.88E-02 | transcription_start_site | - | 50893 | 50893 | 275   | 31696 | AN8380 |
| 3029 | CONTIG152 | 50483 | 50752 | 0.85 | 5.88E-02 | transcription_start_site | + | 52610 | 52610 | -1992 | 31700 | AN8381 |
| 3029 | CONTIG152 | 50483 | 50752 | 0.85 | 5.88E-02 | transcription_start_site | + | 52852 | 52852 | -2234 | 31701 | AN8381 |
| 1285 | CONTIG153 | 32721 | 33065 | 1.7  | 5.20E-03 | transcription_start_site | - | 32329 | 32329 | -564  | 31724 | AN8390 |
| 1285 | CONTIG153 | 32721 | 33065 | 1.7  | 5.20E-03 | transcription_start_site | - | 31906 | 31906 | -987  | 31725 | AN8390 |
| 1285 | CONTIG153 | 32721 | 33065 | 1.7  | 5.20E-03 | transcription_start_site | - | 31721 | 31721 | -1172 | 31726 | AN8390 |
| 1285 | CONTIG153 | 32721 | 33065 | 1.7  | 5.20E-03 | transcription_start_site | - | 31472 | 31472 | -1421 | 31727 | AN8390 |
| 1285 | CONTIG153 | 32721 | 33065 | 1.7  | 5.20E-03 | transcription_start_site | + | 34834 | 34834 | -1941 | 31728 | AN8391 |
| 1285 | CONTIG153 | 32721 | 33065 | 1.7  | 5.20E-03 | transcription_start_site | + | 35681 | 35681 | -2788 | 31729 | AN8391 |
| 1285 | CONTIG153 | 32721 | 33065 | 1.7  | 5.20E-03 | transcription_start_site | + | 35879 | 35879 | -2986 | 31730 | AN8391 |
| 1285 | CONTIG153 | 32721 | 33065 | 1.7  | 5.20E-03 | transcription_start_site | + | 36227 | 36227 | -3334 | 31731 | AN8391 |
| 1285 | CONTIG153 | 32721 | 33065 | 1.7  | 5.20E-03 | transcription_start_site | + | 36566 | 36566 | -3673 | 31732 | AN8391 |
| 1285 | CONTIG153 | 32721 | 33065 | 1.7  | 5.20E-03 | transcription_start_site | + | 37615 | 37615 | -4722 | 31733 | AN8392 |
| 1285 | CONTIG153 | 32721 | 33065 | 1.7  | 5.20E-03 | transcription_start_site | + | 37924 | 37924 | -5031 | 31734 | AN8392 |
| 90   | CONTIG153 | 56558 | 57057 | 3.25 | 0.00E+00 | transcription_start_site | - | 54507 | 54507 | -2300 | 31748 | AN8397 |
| 90   | CONTIG153 | 56558 | 57057 | 3.25 | 0.00E+00 | transcription_start_site | - | 54350 | 54350 | -2457 | 31749 | AN8397 |
| 2976 | CONTIG153 | 54763 | 55332 | 0.94 | 1.66E-01 | transcription_start_site | - | 54507 | 54507 | -540  | 31748 | AN8397 |
| 2976 | CONTIG153 | 54763 | 55332 | 0.94 | 1.66E-01 | transcription_start_site | - | 54350 | 54350 | -697  | 31749 | AN8397 |
| 90   | CONTIG153 | 56558 | 57057 | 3.25 | 0.00E+00 | transcription_start_site | + | 55667 | 55667 | 1140  | 31751 | AN8398 |
| 2976 | CONTIG153 | 54763 | 55332 | 0.94 | 1.66E-01 | transcription_start_site | + | 54920 | 54920 | 127   | 31750 | AN8398 |
| 2976 | CONTIG153 | 54763 | 55332 | 0.94 | 1.66E-01 | transcription_start_site | + | 55667 | 55667 | -619  | 31751 | AN8398 |
| 90   | CONTIG153 | 56558 | 57057 | 3.25 | 0.00E+00 | transcription_start_site | + | 56966 | 56966 | -158  | 31752 | AN8399 |
| 90   | CONTIG153 | 56558 | 57057 | 3.25 | 0.00E+00 | transcription_start_site | + | 57126 | 57126 | -318  | 31753 | AN8399 |
| 90   | CONTIG153 | 56558 | 57057 | 3.25 | 0.00E+00 | transcription_start_site | + | 57874 | 57874 | -1066 | 31754 | AN8399 |
| 90   | CONTIG153 | 56558 | 57057 | 3.25 | 0.00E+00 | transcription_start_site | + | 58366 | 58366 | -1558 | 31755 | AN8399 |
| 90   | CONTIG153 | 56558 | 57057 | 3.25 | 0.00E+00 | transcription_start_site | + | 58562 | 58562 | -1754 | 31756 | AN8399 |
| 90   | CONTIG153 | 56558 | 57057 | 3.25 | 0.00E+00 | transcription_start_site | + | 59472 | 59472 | -2664 | 31757 | AN8399 |
| 90   | CONTIG153 | 56558 | 57057 | 3.25 | 0.00E+00 | transcription_start_site | + | 59922 | 59922 | -3114 | 31758 | AN8399 |
| 90   | CONTIG153 | 56558 | 57057 | 3.25 | 0.00E+00 | transcription_start_site | + | 60122 | 60122 | -3314 | 31759 | AN8399 |
| 90   | CONTIG153 | 56558 | 57057 | 3.25 | 0.00E+00 | transcription_start_site | + | 60629 | 60629 | -3821 | 31760 | AN8399 |
| 2976 | CONTIG153 | 54763 | 55332 | 0.94 | 1.66E-01 | transcription_start_site | + | 56966 | 56966 | -1918 | 31752 | AN8399 |
| 2976 | CONTIG153 | 54763 | 55332 | 0.94 | 1.66E-01 | transcription_start_site | + | 57126 | 57126 | -2078 | 31753 | AN8399 |
| 2976 | CONTIG153 | 54763 | 55332 | 0.94 | 1.66E-01 | transcription_start_site | + | 57874 | 57874 | -2826 | 31754 | AN8399 |

|      |           |        |        |      |          |                          |   |        |        |       |       |        |
|------|-----------|--------|--------|------|----------|--------------------------|---|--------|--------|-------|-------|--------|
| 2976 | CONTIG153 | 54763  | 55332  | 0.94 | 1.66E-01 | transcription_start_site | + | 58366  | 58366  | -3318 | 31755 | AN8399 |
| 2976 | CONTIG153 | 54763  | 55332  | 0.94 | 1.66E-01 | transcription_start_site | + | 58562  | 58562  | -3514 | 31756 | AN8399 |
| 2976 | CONTIG153 | 54763  | 55332  | 0.94 | 1.66E-01 | transcription_start_site | + | 59472  | 59472  | -4424 | 31757 | AN8399 |
| 2976 | CONTIG153 | 54763  | 55332  | 0.94 | 1.66E-01 | transcription_start_site | + | 59922  | 59922  | -4874 | 31758 | AN8399 |
| 2976 | CONTIG153 | 54763  | 55332  | 0.94 | 1.66E-01 | transcription_start_site | + | 60122  | 60122  | -5074 | 31759 | AN8399 |
| 1993 | CONTIG153 | 65777  | 66066  | 1.37 | 2.62E-02 | transcription_start_site | - | 63926  | 63926  | -1995 | 31761 | AN8400 |
| 1993 | CONTIG153 | 65777  | 66066  | 1.37 | 2.62E-02 | transcription_start_site | - | 63787  | 63787  | -2134 | 31762 | AN8400 |
| 1993 | CONTIG153 | 65777  | 66066  | 1.37 | 2.62E-02 | transcription_start_site | - | 63509  | 63509  | -2412 | 31763 | AN8400 |
| 1993 | CONTIG153 | 65777  | 66066  | 1.37 | 2.62E-02 | transcription_start_site | - | 63201  | 63201  | -2720 | 31764 | AN8400 |
| 1993 | CONTIG153 | 65777  | 66066  | 1.37 | 2.62E-02 | transcription_start_site | - | 62716  | 62716  | -3205 | 31765 | AN8400 |
| 1993 | CONTIG153 | 65777  | 66066  | 1.37 | 2.62E-02 | transcription_start_site | - | 62560  | 62560  | -3361 | 31766 | AN8400 |
| 1993 | CONTIG153 | 65777  | 66066  | 1.37 | 2.62E-02 | transcription_start_site | - | 62182  | 62182  | -3739 | 31767 | AN8400 |
| 1993 | CONTIG153 | 65777  | 66066  | 1.37 | 2.62E-02 | transcription_start_site | - | 62018  | 62018  | -3903 | 31768 | AN8400 |
| 1993 | CONTIG153 | 65777  | 66066  | 1.37 | 2.62E-02 | transcription_start_site | - | 61836  | 61836  | -4085 | 31769 | AN8400 |
| 1993 | CONTIG153 | 65777  | 66066  | 1.37 | 2.62E-02 | transcription_start_site | - | 66966  | 66966  | 1044  | 31770 | AN8401 |
| 1993 | CONTIG153 | 65777  | 66066  | 1.37 | 2.62E-02 | transcription_start_site | + | 70434  | 70434  | -4512 | 31772 | AN8403 |
| 1993 | CONTIG153 | 65777  | 66066  | 1.37 | 2.62E-02 | transcription_start_site | + | 70554  | 70554  | -4632 | 31773 | AN8403 |
| 1993 | CONTIG153 | 65777  | 66066  | 1.37 | 2.62E-02 | transcription_start_site | + | 70949  | 70949  | -5027 | 31774 | AN8403 |
| 2882 | CONTIG153 | 79578  | 80017  | 1.01 | 1.25E-01 | transcription_start_site | - | 75361  | 75361  | -4436 | 31781 | AN8405 |
| 2882 | CONTIG153 | 79578  | 80017  | 1.01 | 1.25E-01 | transcription_start_site | - | 74960  | 74960  | -4837 | 31782 | AN8405 |
| 2882 | CONTIG153 | 79578  | 80017  | 1.01 | 1.25E-01 | transcription_start_site | - | 74784  | 74784  | -5013 | 31783 | AN8405 |
| 3013 | CONTIG153 | 77788  | 78202  | 0.9  | 1.93E-01 | transcription_start_site | - | 75361  | 75361  | -2634 | 31781 | AN8405 |
| 3013 | CONTIG153 | 77788  | 78202  | 0.9  | 1.93E-01 | transcription_start_site | - | 74960  | 74960  | -3035 | 31782 | AN8405 |
| 3013 | CONTIG153 | 77788  | 78202  | 0.9  | 1.93E-01 | transcription_start_site | - | 74784  | 74784  | -3211 | 31783 | AN8405 |
| 1893 | CONTIG153 | 82068  | 82429  | 1.41 | 2.12E-02 | transcription_start_site | - | 78367  | 78367  | -3881 | 31784 | AN8406 |
| 1893 | CONTIG153 | 82068  | 82429  | 1.41 | 2.12E-02 | transcription_start_site | - | 78159  | 78159  | -4089 | 31785 | AN8406 |
| 1893 | CONTIG153 | 82068  | 82429  | 1.41 | 2.12E-02 | transcription_start_site | - | 77268  | 77268  | -4980 | 31786 | AN8406 |
| 2882 | CONTIG153 | 79578  | 80017  | 1.01 | 1.25E-01 | transcription_start_site | - | 78367  | 78367  | -1430 | 31784 | AN8406 |
| 2882 | CONTIG153 | 79578  | 80017  | 1.01 | 1.25E-01 | transcription_start_site | - | 78159  | 78159  | -1638 | 31785 | AN8406 |
| 2882 | CONTIG153 | 79578  | 80017  | 1.01 | 1.25E-01 | transcription_start_site | - | 77268  | 77268  | -2529 | 31786 | AN8406 |
| 3013 | CONTIG153 | 77788  | 78202  | 0.9  | 1.93E-01 | transcription_start_site | - | 78159  | 78159  | 164   | 31785 | AN8406 |
| 3013 | CONTIG153 | 77788  | 78202  | 0.9  | 1.93E-01 | transcription_start_site | - | 78367  | 78367  | 372   | 31784 | AN8406 |
| 3013 | CONTIG153 | 77788  | 78202  | 0.9  | 1.93E-01 | transcription_start_site | - | 77268  | 77268  | -727  | 31786 | AN8406 |
| 2882 | CONTIG153 | 79578  | 80017  | 1.01 | 1.25E-01 | transcription_start_site | + | 79755  | 79755  | 42    | 31788 | AN8407 |
| 2882 | CONTIG153 | 79578  | 80017  | 1.01 | 1.25E-01 | transcription_start_site | + | 79264  | 79264  | 533   | 31787 | AN8407 |
| 3013 | CONTIG153 | 77788  | 78202  | 0.9  | 1.93E-01 | transcription_start_site | + | 79264  | 79264  | -1269 | 31787 | AN8407 |
| 3013 | CONTIG153 | 77788  | 78202  | 0.9  | 1.93E-01 | transcription_start_site | + | 79755  | 79755  | -1760 | 31788 | AN8407 |
| 1893 | CONTIG153 | 82068  | 82429  | 1.41 | 2.12E-02 | transcription_start_site | + | 85396  | 85396  | -3147 | 31795 | AN8409 |
| 1893 | CONTIG153 | 82068  | 82429  | 1.41 | 2.12E-02 | transcription_start_site | + | 86025  | 86025  | -3776 | 31796 | AN8409 |
| 1893 | CONTIG153 | 82068  | 82429  | 1.41 | 2.12E-02 | transcription_start_site | + | 86759  | 86759  | -4510 | 31797 | AN8410 |
| 1893 | CONTIG153 | 82068  | 82429  | 1.41 | 2.12E-02 | transcription_start_site | + | 87079  | 87079  | -4830 | 31798 | AN8410 |
| 2822 | CONTIG153 | 115126 | 115711 | 1.05 | 8.36E-02 | transcription_start_site | + | 115404 | 115404 | 14    | 31814 | AN8415 |
| 2822 | CONTIG153 | 115126 | 115711 | 1.05 | 8.36E-02 | transcription_start_site | + | 116059 | 116059 | -640  | 31815 | AN8415 |
| 3014 | CONTIG153 | 116182 | 116761 | 0.9  | 1.93E-01 | transcription_start_site | + | 116059 | 116059 | 412   | 31815 | AN8415 |
| 3014 | CONTIG153 | 116182 | 116761 | 0.9  | 1.93E-01 | transcription_start_site | + | 115404 | 115404 | 1067  | 31814 | AN8415 |
| 2822 | CONTIG153 | 115126 | 115711 | 1.05 | 8.36E-02 | transcription_start_site | + | 117196 | 117196 | -1777 | 31816 | AN8416 |
| 2822 | CONTIG153 | 115126 | 115711 | 1.05 | 8.36E-02 | transcription_start_site | + | 117436 | 117436 | -2017 | 31817 | AN8416 |
| 2822 | CONTIG153 | 115126 | 115711 | 1.05 | 8.36E-02 | transcription_start_site | + | 117622 | 117622 | -2203 | 31818 | AN8416 |
| 2822 | CONTIG153 | 115126 | 115711 | 1.05 | 8.36E-02 | transcription_start_site | + | 117773 | 117773 | -2354 | 31819 | AN8416 |
| 3014 | CONTIG153 | 116182 | 116761 | 0.9  | 1.93E-01 | transcription_start_site | + | 117196 | 117196 | -724  | 31816 | AN8416 |
| 3014 | CONTIG153 | 116182 | 116761 | 0.9  | 1.93E-01 | transcription_start_site | + | 117436 | 117436 | -964  | 31817 | AN8416 |
| 3014 | CONTIG153 | 116182 | 116761 | 0.9  | 1.93E-01 | transcription_start_site | + | 117622 | 117622 | -1150 | 31818 | AN8416 |
| 3014 | CONTIG153 | 116182 | 116761 | 0.9  | 1.93E-01 | transcription_start_site | + | 117773 | 117773 | -1301 | 31819 | AN8416 |
| 3014 | CONTIG153 | 116182 | 116761 | 0.9  | 1.93E-01 | transcription_start_site | + | 121435 | 121435 | -4963 | 31821 | AN8418 |
| 3014 | CONTIG153 | 116182 | 116761 | 0.9  | 1.93E-01 | transcription_start_site | + | 121525 | 121525 | -5053 | 31822 | AN8418 |
| 2628 | CONTIG153 | 157815 | 158769 | 1.15 | 5.05E-02 | transcription_start_site | - | 158332 | 158332 | 40    | 31854 | AN8430 |
| 2628 | CONTIG153 | 157815 | 158769 | 1.15 | 5.05E-02 | transcription_start_site | - | 158547 | 158547 | 255   | 31853 | AN8430 |

|      |           |        |        |      |          |                          |   |        |        |       |       |        |
|------|-----------|--------|--------|------|----------|--------------------------|---|--------|--------|-------|-------|--------|
| 2628 | CONTIG153 | 157815 | 158769 | 1.15 | 5.05E-02 | transcription_start_site | + | 158870 | 158870 | -578  | 31855 | AN8431 |
| 2628 | CONTIG153 | 157815 | 158769 | 1.15 | 5.05E-02 | transcription_start_site | + | 159031 | 159031 | -739  | 31856 | AN8431 |
| 2883 | CONTIG153 | 178276 | 178717 | 1.01 | 1.25E-01 | transcription_start_site | - | 178624 | 178624 | 127   | 31882 | AN8437 |
| 2883 | CONTIG153 | 178276 | 178717 | 1.01 | 1.25E-01 | transcription_start_site | - | 178687 | 178687 | 190   | 31881 | AN8437 |
| 2883 | CONTIG153 | 178276 | 178717 | 1.01 | 1.25E-01 | transcription_start_site | - | 178967 | 178967 | 470   | 31880 | AN8437 |
| 2883 | CONTIG153 | 178276 | 178717 | 1.01 | 1.25E-01 | transcription_start_site | - | 179060 | 179060 | 563   | 31879 | AN8437 |
| 2883 | CONTIG153 | 178276 | 178717 | 1.01 | 1.25E-01 | transcription_start_site | - | 177595 | 177595 | -901  | 31883 | AN8437 |
| 2883 | CONTIG153 | 178276 | 178717 | 1.01 | 1.25E-01 | transcription_start_site | + | 179697 | 179697 | -1200 | 31884 | AN8438 |
| 2883 | CONTIG153 | 178276 | 178717 | 1.01 | 1.25E-01 | transcription_start_site | + | 179898 | 179898 | -1401 | 31885 | AN8438 |
| 2883 | CONTIG153 | 178276 | 178717 | 1.01 | 1.25E-01 | transcription_start_site | + | 180130 | 180130 | -1633 | 31886 | AN8438 |
| 2883 | CONTIG153 | 178276 | 178717 | 1.01 | 1.25E-01 | transcription_start_site | + | 180542 | 180542 | -2045 | 31887 | AN8438 |
| 2883 | CONTIG153 | 178276 | 178717 | 1.01 | 1.25E-01 | transcription_start_site | + | 180858 | 180858 | -2361 | 31888 | AN8438 |
| 1345 | CONTIG153 | 194786 | 195895 | 1.66 | 1.35E-03 | transcription_start_site | - | 191443 | 191443 | -3897 | 31891 | AN8442 |
| 1345 | CONTIG153 | 194786 | 195895 | 1.66 | 1.35E-03 | transcription_start_site | - | 191221 | 191221 | -4119 | 31892 | AN8442 |
| 1345 | CONTIG153 | 194786 | 195895 | 1.66 | 1.35E-03 | transcription_start_site | - | 190729 | 190729 | -4611 | 31893 | AN8442 |
| 1345 | CONTIG153 | 194786 | 195895 | 1.66 | 1.35E-03 | transcription_start_site | - | 195725 | 195725 | 384   | 31895 | AN8443 |
| 1345 | CONTIG153 | 194786 | 195895 | 1.66 | 1.35E-03 | transcription_start_site | - | 195997 | 195997 | 656   | 31894 | AN8443 |
| 1818 | CONTIG153 | 197631 | 197975 | 1.44 | 1.84E-02 | transcription_start_site | - | 195997 | 195997 | -1806 | 31894 | AN8443 |
| 1818 | CONTIG153 | 197631 | 197975 | 1.44 | 1.84E-02 | transcription_start_site | - | 195725 | 195725 | -2078 | 31895 | AN8443 |
| 1818 | CONTIG153 | 197631 | 197975 | 1.44 | 1.84E-02 | transcription_start_site | - | 198119 | 198119 | 316   | 31897 | AN8444 |
| 1818 | CONTIG153 | 197631 | 197975 | 1.44 | 1.84E-02 | transcription_start_site | - | 198406 | 198406 | 603   | 31896 | AN8444 |
| 1818 | CONTIG153 | 197631 | 197975 | 1.44 | 1.84E-02 | transcription_start_site | - | 196920 | 196920 | -883  | 31898 | AN8444 |
| 2631 | CONTIG153 | 201246 | 201875 | 1.15 | 6.84E-02 | transcription_start_site | - | 198406 | 198406 | -3154 | 31896 | AN8444 |
| 2631 | CONTIG153 | 201246 | 201875 | 1.15 | 6.84E-02 | transcription_start_site | - | 198119 | 198119 | -3441 | 31897 | AN8444 |
| 2631 | CONTIG153 | 201246 | 201875 | 1.15 | 6.84E-02 | transcription_start_site | - | 196920 | 196920 | -4640 | 31898 | AN8444 |
| 1891 | CONTIG153 | 216682 | 217041 | 1.41 | 1.06E-02 | transcription_start_site | - | 216676 | 216676 | -185  | 31912 | AN8449 |
| 1891 | CONTIG153 | 216682 | 217041 | 1.41 | 1.06E-02 | transcription_start_site | - | 216378 | 216378 | -483  | 31913 | AN8449 |
| 1891 | CONTIG153 | 216682 | 217041 | 1.41 | 1.06E-02 | transcription_start_site | - | 214880 | 214880 | -1981 | 31914 | AN8449 |
| 1891 | CONTIG153 | 216682 | 217041 | 1.41 | 1.06E-02 | transcription_start_site | - | 214760 | 214760 | -2101 | 31915 | AN8449 |
| 1891 | CONTIG153 | 216682 | 217041 | 1.41 | 1.06E-02 | transcription_start_site | - | 214322 | 214322 | -2539 | 31916 | AN8449 |
| 1891 | CONTIG153 | 216682 | 217041 | 1.41 | 1.06E-02 | transcription_start_site | - | 214151 | 214151 | -2710 | 31917 | AN8449 |
| 2949 | CONTIG153 | 234919 | 235328 | 0.97 | 1.44E-01 | transcription_start_site | - | 235173 | 235173 | 49    | 31930 | AN8454 |
| 2949 | CONTIG153 | 234919 | 235328 | 0.97 | 1.44E-01 | transcription_start_site | - | 235806 | 235806 | 682   | 31929 | AN8454 |
| 2949 | CONTIG153 | 234919 | 235328 | 0.97 | 1.44E-01 | transcription_start_site | - | 234208 | 234208 | -915  | 31931 | AN8454 |
| 2949 | CONTIG153 | 234919 | 235328 | 0.97 | 1.44E-01 | transcription_start_site | - | 236199 | 236199 | 1075  | 31928 | AN8454 |
| 1346 | CONTIG153 | 257709 | 258743 | 1.66 | 1.35E-03 | transcription_start_site | - | 253426 | 253426 | -4800 | 31948 | AN8459 |
| 1346 | CONTIG153 | 257709 | 258743 | 1.66 | 1.35E-03 | transcription_start_site | - | 253207 | 253207 | -5019 | 31949 | AN8459 |
| 1346 | CONTIG153 | 257709 | 258743 | 1.66 | 1.35E-03 | transcription_start_site | - | 258071 | 258071 | -155  | 31954 | AN8461 |
| 1346 | CONTIG153 | 257709 | 258743 | 1.66 | 1.35E-03 | transcription_start_site | + | 261846 | 261846 | -3620 | 31956 | AN8463 |
| 1346 | CONTIG153 | 257709 | 258743 | 1.66 | 1.35E-03 | transcription_start_site | + | 262213 | 262213 | -3987 | 31957 | AN8463 |
| 1892 | CONTIG153 | 305184 | 306064 | 1.41 | 1.06E-02 | transcription_start_site | - | 300756 | 300756 | -4868 | 31998 | AN8475 |
| 1892 | CONTIG153 | 305184 | 306064 | 1.41 | 1.06E-02 | transcription_start_site | - | 300433 | 300433 | -5191 | 31999 | AN8475 |
| 1892 | CONTIG153 | 305184 | 306064 | 1.41 | 1.06E-02 | transcription_start_site | + | 305130 | 305130 | 494   | 32005 | AN8477 |
| 1892 | CONTIG153 | 305184 | 306064 | 1.41 | 1.06E-02 | transcription_start_site | + | 306858 | 306858 | -1234 | 32006 | AN8478 |
| 1892 | CONTIG153 | 305184 | 306064 | 1.41 | 1.06E-02 | transcription_start_site | + | 307917 | 307917 | -2293 | 32007 | AN8478 |
| 1347 | CONTIG153 | 338863 | 339294 | 1.66 | 2.49E-03 | transcription_start_site | + | 339352 | 339352 | -273  | 32026 | AN8483 |
| 1347 | CONTIG153 | 338863 | 339294 | 1.66 | 2.49E-03 | transcription_start_site | + | 339527 | 339527 | -448  | 32027 | AN8483 |
| 1632 | CONTIG153 | 340058 | 340632 | 1.52 | 1.30E-02 | transcription_start_site | + | 339527 | 339527 | 818   | 32027 | AN8483 |
| 1632 | CONTIG153 | 340058 | 340632 | 1.52 | 1.30E-02 | transcription_start_site | + | 339352 | 339352 | 993   | 32026 | AN8483 |
| 1414 | CONTIG153 | 342843 | 343327 | 1.62 | 3.31E-03 | transcription_start_site | - | 344034 | 344034 | 949   | 32028 | AN8484 |
| 1488 | CONTIG153 | 346594 | 347100 | 1.59 | 8.81E-03 | transcription_start_site | - | 344034 | 344034 | -2813 | 32028 | AN8484 |
| 1488 | CONTIG153 | 346594 | 347100 | 1.59 | 8.81E-03 | transcription_start_site | - | 346572 | 346572 | -275  | 32029 | AN8485 |
| 1488 | CONTIG153 | 346594 | 347100 | 1.59 | 8.81E-03 | transcription_start_site | - | 345880 | 345880 | -967  | 32030 | AN8485 |
| 1488 | CONTIG153 | 346594 | 347100 | 1.59 | 8.81E-03 | transcription_start_site | + | 349086 | 349086 | -2239 | 32031 | AN8486 |
| 1488 | CONTIG153 | 346594 | 347100 | 1.59 | 8.81E-03 | transcription_start_site | + | 351875 | 351875 | -5028 | 32032 | AN8487 |
| 2884 | CONTIG153 | 353039 | 353528 | 1.01 | 1.25E-01 | transcription_start_site | + | 352338 | 352338 | 945   | 32033 | AN8487 |
| 2884 | CONTIG153 | 353039 | 353528 | 1.01 | 1.25E-01 | transcription_start_site | + | 353254 | 353254 | 29    | 32035 | AN8488 |



|      |           |        |        |      |          |                          |   |        |        |       |       |        |
|------|-----------|--------|--------|------|----------|--------------------------|---|--------|--------|-------|-------|--------|
| 2884 | CONTIG153 | 353039 | 353528 | 1.01 | 1.25E-01 | transcription_start_site | + | 353186 | 353186 | 97    | 32034 | AN8488 |
| 2884 | CONTIG153 | 353039 | 353528 | 1.01 | 1.25E-01 | transcription_start_site | + | 353515 | 353515 | -231  | 32036 | AN8488 |
| 2884 | CONTIG153 | 353039 | 353528 | 1.01 | 1.25E-01 | transcription_start_site | + | 353879 | 353879 | -595  | 32037 | AN8488 |
| 1349 | CONTIG153 | 359414 | 359683 | 1.66 | 6.61E-03 | transcription_start_site | - | 358972 | 358972 | -576  | 32038 | AN8489 |
| 1349 | CONTIG153 | 359414 | 359683 | 1.66 | 6.61E-03 | transcription_start_site | - | 358198 | 358198 | -1350 | 32039 | AN8489 |
| 1349 | CONTIG153 | 359414 | 359683 | 1.66 | 6.61E-03 | transcription_start_site | - | 357122 | 357122 | -2426 | 32040 | AN8489 |
| 1349 | CONTIG153 | 359414 | 359683 | 1.66 | 6.61E-03 | transcription_start_site | - | 356339 | 356339 | -3209 | 32041 | AN8489 |
| 2175 | CONTIG153 | 359788 | 360891 | 1.3  | 2.18E-02 | transcription_start_site | - | 358972 | 358972 | -1367 | 32038 | AN8489 |
| 2175 | CONTIG153 | 359788 | 360891 | 1.3  | 2.18E-02 | transcription_start_site | - | 358198 | 358198 | -2141 | 32039 | AN8489 |
| 2175 | CONTIG153 | 359788 | 360891 | 1.3  | 2.18E-02 | transcription_start_site | - | 357122 | 357122 | -3217 | 32040 | AN8489 |
| 2175 | CONTIG153 | 359788 | 360891 | 1.3  | 2.18E-02 | transcription_start_site | - | 356339 | 356339 | -4000 | 32041 | AN8489 |
| 1348 | CONTIG153 | 366612 | 366968 | 1.66 | 2.49E-03 | transcription_start_site | - | 366430 | 366430 | -360  | 32042 | AN8490 |
| 1348 | CONTIG153 | 366612 | 366968 | 1.66 | 2.49E-03 | transcription_start_site | - | 366255 | 366255 | -535  | 32043 | AN8490 |
| 1348 | CONTIG153 | 366612 | 366968 | 1.66 | 2.49E-03 | transcription_start_site | - | 365964 | 365964 | -826  | 32044 | AN8490 |
| 1348 | CONTIG153 | 366612 | 366968 | 1.66 | 2.49E-03 | transcription_start_site | + | 366964 | 366964 | -174  | 32045 | AN8491 |
| 1348 | CONTIG153 | 366612 | 366968 | 1.66 | 2.49E-03 | transcription_start_site | + | 367101 | 367101 | -311  | 32046 | AN8491 |
| 1348 | CONTIG153 | 366612 | 366968 | 1.66 | 2.49E-03 | transcription_start_site | + | 367321 | 367321 | -531  | 32047 | AN8491 |
| 1348 | CONTIG153 | 366612 | 366968 | 1.66 | 2.49E-03 | transcription_start_site | + | 369439 | 369439 | -2649 | 32053 | AN8493 |
| 1348 | CONTIG153 | 366612 | 366968 | 1.66 | 2.49E-03 | transcription_start_site | + | 369607 | 369607 | -2817 | 32054 | AN8493 |
| 1348 | CONTIG153 | 366612 | 366968 | 1.66 | 2.49E-03 | transcription_start_site | + | 369912 | 369912 | -3122 | 32055 | AN8493 |
| 1348 | CONTIG153 | 366612 | 366968 | 1.66 | 2.49E-03 | transcription_start_site | + | 370177 | 370177 | -3387 | 32056 | AN8493 |
| 1348 | CONTIG153 | 366612 | 366968 | 1.66 | 2.49E-03 | transcription_start_site | + | 370384 | 370384 | -3594 | 32057 | AN8493 |
| 1348 | CONTIG153 | 366612 | 366968 | 1.66 | 2.49E-03 | transcription_start_site | + | 370757 | 370757 | -3967 | 32058 | AN8493 |
| 1086 | CONTIG153 | 376577 | 377083 | 1.84 | 2.22E-03 | transcription_start_site | - | 373741 | 373741 | -3089 | 32059 | AN8494 |
| 1086 | CONTIG153 | 376577 | 377083 | 1.84 | 2.22E-03 | transcription_start_site | - | 373427 | 373427 | -3403 | 32060 | AN8494 |
| 1086 | CONTIG153 | 376577 | 377083 | 1.84 | 2.22E-03 | transcription_start_site | - | 373037 | 373037 | -3793 | 32061 | AN8494 |
| 1086 | CONTIG153 | 376577 | 377083 | 1.84 | 2.22E-03 | transcription_start_site | - | 372292 | 372292 | -4538 | 32062 | AN8494 |
| 1086 | CONTIG153 | 376577 | 377083 | 1.84 | 2.22E-03 | transcription_start_site | - | 372045 | 372045 | -4785 | 32063 | AN8494 |
| 1086 | CONTIG153 | 376577 | 377083 | 1.84 | 2.22E-03 | transcription_start_site | - | 371639 | 371639 | -5191 | 32064 | AN8494 |
| 2775 | CONTIG153 | 375692 | 376026 | 1.08 | 9.24E-02 | transcription_start_site | - | 373741 | 373741 | -2118 | 32059 | AN8494 |
| 2775 | CONTIG153 | 375692 | 376026 | 1.08 | 9.24E-02 | transcription_start_site | - | 373427 | 373427 | -2432 | 32060 | AN8494 |
| 2775 | CONTIG153 | 375692 | 376026 | 1.08 | 9.24E-02 | transcription_start_site | - | 373037 | 373037 | -2822 | 32061 | AN8494 |
| 2775 | CONTIG153 | 375692 | 376026 | 1.08 | 9.24E-02 | transcription_start_site | - | 372292 | 372292 | -3567 | 32062 | AN8494 |
| 2775 | CONTIG153 | 375692 | 376026 | 1.08 | 9.24E-02 | transcription_start_site | - | 372045 | 372045 | -3814 | 32063 | AN8494 |
| 2775 | CONTIG153 | 375692 | 376026 | 1.08 | 9.24E-02 | transcription_start_site | - | 371639 | 371639 | -4220 | 32064 | AN8494 |
| 1086 | CONTIG153 | 376577 | 377083 | 1.84 | 2.22E-03 | transcription_start_site | + | 377090 | 377090 | -260  | 32065 | AN8495 |
| 2775 | CONTIG153 | 375692 | 376026 | 1.08 | 9.24E-02 | transcription_start_site | + | 377090 | 377090 | -1231 | 32065 | AN8495 |
| 2977 | CONTIG153 | 391591 | 391870 | 0.94 | 1.66E-01 | transcription_start_site | - | 390020 | 390020 | -1710 | 32079 | AN8500 |
| 2977 | CONTIG153 | 391591 | 391870 | 0.94 | 1.66E-01 | transcription_start_site | + | 391806 | 391806 | -75   | 32080 | AN8501 |
| 2977 | CONTIG153 | 391591 | 391870 | 0.94 | 1.66E-01 | transcription_start_site | + | 392126 | 392126 | -395  | 32081 | AN8501 |
| 2977 | CONTIG153 | 391591 | 391870 | 0.94 | 1.66E-01 | transcription_start_site | + | 392285 | 392285 | -554  | 32082 | AN8501 |
| 2977 | CONTIG153 | 391591 | 391870 | 0.94 | 1.66E-01 | transcription_start_site | + | 392488 | 392488 | -757  | 32083 | AN8501 |
| 2977 | CONTIG153 | 391591 | 391870 | 0.94 | 1.66E-01 | transcription_start_site | + | 393011 | 393011 | -1280 | 32084 | AN8501 |
| 2977 | CONTIG153 | 391591 | 391870 | 0.94 | 1.66E-01 | transcription_start_site | + | 393193 | 393193 | -1462 | 32085 | AN8501 |
| 742  | CONTIG153 | 395116 | 395375 | 2.16 | 2.16E-04 | transcription_start_site | + | 395676 | 395676 | -430  | 32086 | AN8502 |
| 742  | CONTIG153 | 395116 | 395375 | 2.16 | 2.16E-04 | transcription_start_site | + | 395900 | 395900 | -654  | 32087 | AN8502 |
| 1284 | CONTIG153 | 396237 | 396661 | 1.7  | 2.32E-03 | transcription_start_site | + | 395900 | 395900 | 549   | 32087 | AN8502 |
| 1284 | CONTIG153 | 396237 | 396661 | 1.7  | 2.32E-03 | transcription_start_site | + | 395676 | 395676 | 773   | 32086 | AN8502 |
| 2977 | CONTIG153 | 391591 | 391870 | 0.94 | 1.66E-01 | transcription_start_site | + | 395676 | 395676 | -3945 | 32086 | AN8502 |
| 2977 | CONTIG153 | 391591 | 391870 | 0.94 | 1.66E-01 | transcription_start_site | + | 395900 | 395900 | -4169 | 32087 | AN8502 |
| 742  | CONTIG153 | 395116 | 395375 | 2.16 | 2.16E-04 | transcription_start_site | + | 397789 | 397789 | -2543 | 32088 | AN8503 |
| 742  | CONTIG153 | 395116 | 395375 | 2.16 | 2.16E-04 | transcription_start_site | + | 398120 | 398120 | -2874 | 32089 | AN8503 |
| 957  | CONTIG153 | 397592 | 397941 | 1.95 | 1.22E-03 | transcription_start_site | + | 397789 | 397789 | -22   | 32088 | AN8503 |
| 957  | CONTIG153 | 397592 | 397941 | 1.95 | 1.22E-03 | transcription_start_site | + | 398120 | 398120 | -353  | 32089 | AN8503 |
| 1284 | CONTIG153 | 396237 | 396661 | 1.7  | 2.32E-03 | transcription_start_site | + | 397789 | 397789 | -1340 | 32088 | AN8503 |
| 1284 | CONTIG153 | 396237 | 396661 | 1.7  | 2.32E-03 | transcription_start_site | + | 398120 | 398120 | -1671 | 32089 | AN8503 |
| 1398 | CONTIG154 | 3471   | 3743   | 1.63 | 3.08E-02 | transcription_start_site | + | 3925   | 3925   | -318  | 32093 | AN8505 |

|      |           |       |       |      |          |                          |   |       |       |       |       |        |
|------|-----------|-------|-------|------|----------|--------------------------|---|-------|-------|-------|-------|--------|
| 1398 | CONTIG154 | 3471  | 3743  | 1.63 | 3.08E-02 | transcription_start_site | + | 4398  | 4398  | -791  | 32094 | AN8505 |
| 1398 | CONTIG154 | 3471  | 3743  | 1.63 | 3.08E-02 | transcription_start_site | + | 5559  | 5559  | -1952 | 32095 | AN8505 |
| 1398 | CONTIG154 | 3471  | 3743  | 1.63 | 3.08E-02 | transcription_start_site | + | 6016  | 6016  | -2409 | 32096 | AN8505 |
| 2637 | CONTIG154 | 9826  | 10482 | 1.15 | 1.66E-01 | transcription_start_site | - | 10173 | 10173 | 19    | 32097 | AN8506 |
| 2637 | CONTIG154 | 9826  | 10482 | 1.15 | 1.66E-01 | transcription_start_site | - | 9785  | 9785  | -369  | 32098 | AN8506 |
| 2637 | CONTIG154 | 9826  | 10482 | 1.15 | 1.66E-01 | transcription_start_site | - | 9582  | 9582  | -572  | 32099 | AN8506 |
| 2637 | CONTIG154 | 9826  | 10482 | 1.15 | 1.66E-01 | transcription_start_site | - | 9461  | 9461  | -693  | 32100 | AN8506 |
| 2637 | CONTIG154 | 9826  | 10482 | 1.15 | 1.66E-01 | transcription_start_site | - | 8749  | 8749  | -1405 | 32101 | AN8506 |
| 2749 | CONTIG154 | 9076  | 9350  | 1.1  | 1.93E-01 | transcription_start_site | - | 9461  | 9461  | 248   | 32100 | AN8506 |
| 2749 | CONTIG154 | 9076  | 9350  | 1.1  | 1.93E-01 | transcription_start_site | - | 9582  | 9582  | 369   | 32099 | AN8506 |
| 2749 | CONTIG154 | 9076  | 9350  | 1.1  | 1.93E-01 | transcription_start_site | - | 8749  | 8749  | -464  | 32101 | AN8506 |
| 2749 | CONTIG154 | 9076  | 9350  | 1.1  | 1.93E-01 | transcription_start_site | - | 9785  | 9785  | 572   | 32098 | AN8506 |
| 2749 | CONTIG154 | 9076  | 9350  | 1.1  | 1.93E-01 | transcription_start_site | - | 10173 | 10173 | 960   | 32097 | AN8506 |
| 2637 | CONTIG154 | 9826  | 10482 | 1.15 | 1.66E-01 | transcription_start_site | + | 10479 | 10479 | -325  | 32102 | AN8507 |
| 2637 | CONTIG154 | 9826  | 10482 | 1.15 | 1.66E-01 | transcription_start_site | + | 10810 | 10810 | -656  | 32103 | AN8507 |
| 2637 | CONTIG154 | 9826  | 10482 | 1.15 | 1.66E-01 | transcription_start_site | + | 11083 | 11083 | -929  | 32104 | AN8507 |
| 2637 | CONTIG154 | 9826  | 10482 | 1.15 | 1.66E-01 | transcription_start_site | + | 11472 | 11472 | -1318 | 32105 | AN8507 |
| 2637 | CONTIG154 | 9826  | 10482 | 1.15 | 1.66E-01 | transcription_start_site | + | 11625 | 11625 | -1471 | 32106 | AN8507 |
| 2749 | CONTIG154 | 9076  | 9350  | 1.1  | 1.93E-01 | transcription_start_site | + | 10479 | 10479 | -1266 | 32102 | AN8507 |
| 2749 | CONTIG154 | 9076  | 9350  | 1.1  | 1.93E-01 | transcription_start_site | + | 10810 | 10810 | -1597 | 32103 | AN8507 |
| 2749 | CONTIG154 | 9076  | 9350  | 1.1  | 1.93E-01 | transcription_start_site | + | 11083 | 11083 | -1870 | 32104 | AN8507 |
| 2749 | CONTIG154 | 9076  | 9350  | 1.1  | 1.93E-01 | transcription_start_site | + | 11472 | 11472 | -2259 | 32105 | AN8507 |
| 2749 | CONTIG154 | 9076  | 9350  | 1.1  | 1.93E-01 | transcription_start_site | + | 11625 | 11625 | -2412 | 32106 | AN8507 |
| 2637 | CONTIG154 | 9826  | 10482 | 1.15 | 1.66E-01 | transcription_start_site | + | 13458 | 13458 | -3304 | 32107 | AN8508 |
| 2637 | CONTIG154 | 9826  | 10482 | 1.15 | 1.66E-01 | transcription_start_site | + | 13909 | 13909 | -3755 | 32108 | AN8508 |
| 2637 | CONTIG154 | 9826  | 10482 | 1.15 | 1.66E-01 | transcription_start_site | + | 14040 | 14040 | -3886 | 32109 | AN8508 |
| 2749 | CONTIG154 | 9076  | 9350  | 1.1  | 1.93E-01 | transcription_start_site | + | 13458 | 13458 | -4245 | 32107 | AN8508 |
| 2749 | CONTIG154 | 9076  | 9350  | 1.1  | 1.93E-01 | transcription_start_site | + | 13909 | 13909 | -4696 | 32108 | AN8508 |
| 2749 | CONTIG154 | 9076  | 9350  | 1.1  | 1.93E-01 | transcription_start_site | + | 14040 | 14040 | -4827 | 32109 | AN8508 |
| 2637 | CONTIG154 | 9826  | 10482 | 1.15 | 1.66E-01 | transcription_start_site | + | 15449 | 15449 | -5295 | 32110 | AN8509 |
| 373  | CONTIG154 | 21696 | 22121 | 2.65 | 2.16E-04 | transcription_start_site | - | 19291 | 19291 | -2617 | 32113 | AN8510 |
| 373  | CONTIG154 | 21696 | 22121 | 2.65 | 2.16E-04 | transcription_start_site | - | 19186 | 19186 | -2722 | 32114 | AN8510 |
| 373  | CONTIG154 | 21696 | 22121 | 2.65 | 2.16E-04 | transcription_start_site | - | 18492 | 18492 | -3416 | 32115 | AN8510 |
| 373  | CONTIG154 | 21696 | 22121 | 2.65 | 2.16E-04 | transcription_start_site | - | 18201 | 18201 | -3707 | 32116 | AN8510 |
| 373  | CONTIG154 | 21696 | 22121 | 2.65 | 2.16E-04 | transcription_start_site | - | 17909 | 17909 | -3999 | 32117 | AN8510 |
| 373  | CONTIG154 | 21696 | 22121 | 2.65 | 2.16E-04 | transcription_start_site | - | 17736 | 17736 | -4172 | 32118 | AN8510 |
| 373  | CONTIG154 | 21696 | 22121 | 2.65 | 2.16E-04 | transcription_start_site | + | 21125 | 21125 | 783   | 32122 | AN8511 |
| 373  | CONTIG154 | 21696 | 22121 | 2.65 | 2.16E-04 | transcription_start_site | + | 22395 | 22395 | -486  | 32123 | AN8512 |
| 373  | CONTIG154 | 21696 | 22121 | 2.65 | 2.16E-04 | transcription_start_site | + | 22513 | 22513 | -604  | 32124 | AN8512 |
| 373  | CONTIG154 | 21696 | 22121 | 2.65 | 2.16E-04 | transcription_start_site | + | 22872 | 22872 | -963  | 32125 | AN8512 |
| 2262 | CONTIG154 | 24681 | 25345 | 1.28 | 1.08E-01 | transcription_start_site | - | 24151 | 24151 | -862  | 32127 | AN8513 |
| 2534 | CONTIG154 | 26111 | 26385 | 1.19 | 1.44E-01 | transcription_start_site | - | 26851 | 26851 | 603   | 32126 | AN8513 |
| 2534 | CONTIG154 | 26111 | 26385 | 1.19 | 1.44E-01 | transcription_start_site | - | 24151 | 24151 | -2097 | 32127 | AN8513 |
| 2262 | CONTIG154 | 24681 | 25345 | 1.28 | 1.08E-01 | transcription_start_site | + | 27241 | 27241 | -2228 | 32128 | AN8514 |
| 2262 | CONTIG154 | 24681 | 25345 | 1.28 | 1.08E-01 | transcription_start_site | + | 27928 | 27928 | -2915 | 32129 | AN8514 |
| 2262 | CONTIG154 | 24681 | 25345 | 1.28 | 1.08E-01 | transcription_start_site | + | 28489 | 28489 | -3476 | 32130 | AN8514 |
| 2534 | CONTIG154 | 26111 | 26385 | 1.19 | 1.44E-01 | transcription_start_site | + | 27241 | 27241 | -993  | 32128 | AN8514 |
| 2534 | CONTIG154 | 26111 | 26385 | 1.19 | 1.44E-01 | transcription_start_site | + | 27928 | 27928 | -1680 | 32129 | AN8514 |
| 2534 | CONTIG154 | 26111 | 26385 | 1.19 | 1.44E-01 | transcription_start_site | + | 28489 | 28489 | -2241 | 32130 | AN8514 |
| 2262 | CONTIG154 | 24681 | 25345 | 1.28 | 1.08E-01 | transcription_start_site | + | 29284 | 29284 | -4271 | 32131 | AN8515 |
| 2534 | CONTIG154 | 26111 | 26385 | 1.19 | 1.44E-01 | transcription_start_site | + | 29284 | 29284 | -3036 | 32131 | AN8515 |
| 2534 | CONTIG154 | 26111 | 26385 | 1.19 | 1.44E-01 | transcription_start_site | + | 30568 | 30568 | -4320 | 32132 | AN8516 |
| 2534 | CONTIG154 | 26111 | 26385 | 1.19 | 1.44E-01 | transcription_start_site | + | 30704 | 30704 | -4456 | 32133 | AN8516 |
| 2534 | CONTIG154 | 26111 | 26385 | 1.19 | 1.44E-01 | transcription_start_site | + | 30961 | 30961 | -4713 | 32134 | AN8516 |
| 2534 | CONTIG154 | 26111 | 26385 | 1.19 | 1.44E-01 | transcription_start_site | + | 31240 | 31240 | -4992 | 32135 | AN8516 |
| 1789 | CONTIG155 | 9021  | 9299  | 1.46 | 3.70E-02 | transcription_start_site | - | 4414  | 4414  | -4746 | 32153 | AN8520 |
| 1789 | CONTIG155 | 9021  | 9299  | 1.46 | 3.70E-02 | transcription_start_site | - | 4335  | 4335  | -4825 | 32154 | AN8520 |

|      |           |       |       |      |          |                          |   |       |       |       |       |        |
|------|-----------|-------|-------|------|----------|--------------------------|---|-------|-------|-------|-------|--------|
| 1789 | CONTIG155 | 9021  | 9299  | 1.46 | 3.70E-02 | transcription_start_site | - | 4182  | 4182  | -4978 | 32155 | AN8520 |
| 1789 | CONTIG155 | 9021  | 9299  | 1.46 | 3.70E-02 | transcription_start_site | - | 4100  | 4100  | -5060 | 32156 | AN8520 |
| 2676 | CONTIG155 | 6171  | 6520  | 1.13 | 1.25E-01 | transcription_start_site | - | 4414  | 4414  | -1931 | 32153 | AN8520 |
| 2676 | CONTIG155 | 6171  | 6520  | 1.13 | 1.25E-01 | transcription_start_site | - | 4335  | 4335  | -2010 | 32154 | AN8520 |
| 2676 | CONTIG155 | 6171  | 6520  | 1.13 | 1.25E-01 | transcription_start_site | - | 4182  | 4182  | -2163 | 32155 | AN8520 |
| 2676 | CONTIG155 | 6171  | 6520  | 1.13 | 1.25E-01 | transcription_start_site | - | 4100  | 4100  | -2245 | 32156 | AN8520 |
| 2676 | CONTIG155 | 6171  | 6520  | 1.13 | 1.25E-01 | transcription_start_site | - | 3954  | 3954  | -2391 | 32157 | AN8520 |
| 2676 | CONTIG155 | 6171  | 6520  | 1.13 | 1.25E-01 | transcription_start_site | - | 3757  | 3757  | -2588 | 32158 | AN8520 |
| 2676 | CONTIG155 | 6171  | 6520  | 1.13 | 1.25E-01 | transcription_start_site | - | 3093  | 3093  | -3252 | 32159 | AN8520 |
| 2676 | CONTIG155 | 6171  | 6520  | 1.13 | 1.25E-01 | transcription_start_site | + | 6384  | 6384  | -38   | 32161 | AN8521 |
| 2676 | CONTIG155 | 6171  | 6520  | 1.13 | 1.25E-01 | transcription_start_site | + | 5967  | 5967  | 378   | 32160 | AN8521 |
| 1789 | CONTIG155 | 9021  | 9299  | 1.46 | 3.70E-02 | transcription_start_site | - | 9166  | 9166  | 6     | 32162 | AN8522 |
| 1789 | CONTIG155 | 9021  | 9299  | 1.46 | 3.70E-02 | transcription_start_site | - | 8926  | 8926  | -234  | 32163 | AN8522 |
| 1789 | CONTIG155 | 9021  | 9299  | 1.46 | 3.70E-02 | transcription_start_site | + | 9593  | 9593  | -433  | 32164 | AN8523 |
| 2676 | CONTIG155 | 6171  | 6520  | 1.13 | 1.25E-01 | transcription_start_site | + | 9593  | 9593  | -3247 | 32164 | AN8523 |
| 1789 | CONTIG155 | 9021  | 9299  | 1.46 | 3.70E-02 | transcription_start_site | + | 13281 | 13281 | -4121 | 32165 | AN8524 |
| 1789 | CONTIG155 | 9021  | 9299  | 1.46 | 3.70E-02 | transcription_start_site | + | 13517 | 13517 | -4357 | 32166 | AN8524 |
| 1789 | CONTIG155 | 9021  | 9299  | 1.46 | 3.70E-02 | transcription_start_site | + | 14006 | 14006 | -4846 | 32167 | AN8524 |
| 1789 | CONTIG155 | 9021  | 9299  | 1.46 | 3.70E-02 | transcription_start_site | + | 14193 | 14193 | -5033 | 32168 | AN8524 |
| 1790 | CONTIG155 | 16821 | 17151 | 1.46 | 3.70E-02 | transcription_start_site | + | 17152 | 17152 | -166  | 32173 | AN8525 |
| 1790 | CONTIG155 | 16821 | 17151 | 1.46 | 3.70E-02 | transcription_start_site | + | 17557 | 17557 | -571  | 32174 | AN8525 |
| 1790 | CONTIG155 | 16821 | 17151 | 1.46 | 3.70E-02 | transcription_start_site | + | 16265 | 16265 | 721   | 32172 | AN8525 |
| 2353 | CONTIG155 | 26628 | 27137 | 1.25 | 8.01E-02 | transcription_start_site | - | 23903 | 23903 | -2979 | 32176 | AN8527 |
| 2353 | CONTIG155 | 26628 | 27137 | 1.25 | 8.01E-02 | transcription_start_site | - | 27312 | 27312 | 429   | 32177 | AN8528 |
| 2353 | CONTIG155 | 26628 | 27137 | 1.25 | 8.01E-02 | transcription_start_site | - | 27980 | 27980 | 1097  | 32180 | AN8529 |
| 2353 | CONTIG155 | 26628 | 27137 | 1.25 | 8.01E-02 | transcription_start_site | + | 31825 | 31825 | -4942 | 32186 | AN8531 |
| 1420 | CONTIG155 | 40203 | 40492 | 1.62 | 1.84E-02 | transcription_start_site | - | 36601 | 36601 | -3746 | 32190 | AN8533 |
| 1420 | CONTIG155 | 40203 | 40492 | 1.62 | 1.84E-02 | transcription_start_site | - | 36409 | 36409 | -3938 | 32191 | AN8533 |
| 150  | CONTIG156 | 76    | 445   | 3.05 | 9.51E-04 | transcription_start_site | + | 470   | 470   | -209  | 32192 | AN8534 |
| 150  | CONTIG156 | 76    | 445   | 3.05 | 9.51E-04 | transcription_start_site | + | 661   | 661   | -400  | 32193 | AN8534 |
| 150  | CONTIG156 | 76    | 445   | 3.05 | 9.51E-04 | transcription_start_site | + | 840   | 840   | -579  | 32194 | AN8534 |
| 150  | CONTIG156 | 76    | 445   | 3.05 | 9.51E-04 | transcription_start_site | + | 1704  | 1704  | -1443 | 32195 | AN8534 |
| 150  | CONTIG156 | 76    | 445   | 3.05 | 9.51E-04 | transcription_start_site | + | 1855  | 1855  | -1594 | 32196 | AN8534 |
| 150  | CONTIG156 | 76    | 445   | 3.05 | 9.51E-04 | transcription_start_site | + | 4204  | 4204  | -3943 | 32197 | AN8535 |
| 150  | CONTIG156 | 76    | 445   | 3.05 | 9.51E-04 | transcription_start_site | + | 4376  | 4376  | -4115 | 32198 | AN8535 |
| 150  | CONTIG156 | 76    | 445   | 3.05 | 9.51E-04 | transcription_start_site | + | 4976  | 4976  | -4715 | 32199 | AN8535 |
| 150  | CONTIG156 | 76    | 445   | 3.05 | 9.51E-04 | transcription_start_site | + | 5148  | 5148  | -4887 | 32200 | AN8535 |
| 150  | CONTIG156 | 76    | 445   | 3.05 | 9.51E-04 | transcription_start_site | + | 5342  | 5342  | -5081 | 32201 | AN8535 |
| 2073 | CONTIG157 | 30901 | 31565 | 1.34 | 3.99E-02 | transcription_start_site | - | 27429 | 27429 | -3804 | 32239 | AN8545 |
| 2073 | CONTIG157 | 30901 | 31565 | 1.34 | 3.99E-02 | transcription_start_site | - | 26362 | 26362 | -4871 | 32240 | AN8545 |
| 2474 | CONTIG157 | 28821 | 29077 | 1.21 | 9.24E-02 | transcription_start_site | - | 27429 | 27429 | -1520 | 32239 | AN8545 |
| 2474 | CONTIG157 | 28821 | 29077 | 1.21 | 9.24E-02 | transcription_start_site | - | 26362 | 26362 | -2587 | 32240 | AN8545 |
| 2474 | CONTIG157 | 28821 | 29077 | 1.21 | 9.24E-02 | transcription_start_site | + | 28200 | 28200 | 749   | 32241 | AN8546 |
| 570  | CONTIG157 | 33321 | 33575 | 2.35 | 5.64E-04 | transcription_start_site | - | 31946 | 31946 | -1502 | 32242 | AN8547 |
| 570  | CONTIG157 | 33321 | 33575 | 2.35 | 5.64E-04 | transcription_start_site | - | 31832 | 31832 | -1616 | 32243 | AN8547 |
| 570  | CONTIG157 | 33321 | 33575 | 2.35 | 5.64E-04 | transcription_start_site | - | 31427 | 31427 | -2021 | 32244 | AN8547 |
| 570  | CONTIG157 | 33321 | 33575 | 2.35 | 5.64E-04 | transcription_start_site | - | 30803 | 30803 | -2645 | 32245 | AN8547 |
| 570  | CONTIG157 | 33321 | 33575 | 2.35 | 5.64E-04 | transcription_start_site | - | 30128 | 30128 | -3320 | 32246 | AN8547 |
| 2073 | CONTIG157 | 30901 | 31565 | 1.34 | 3.99E-02 | transcription_start_site | - | 31427 | 31427 | 194   | 32244 | AN8547 |
| 2073 | CONTIG157 | 30901 | 31565 | 1.34 | 3.99E-02 | transcription_start_site | - | 30803 | 30803 | -430  | 32245 | AN8547 |
| 2073 | CONTIG157 | 30901 | 31565 | 1.34 | 3.99E-02 | transcription_start_site | - | 31832 | 31832 | 599   | 32243 | AN8547 |
| 2073 | CONTIG157 | 30901 | 31565 | 1.34 | 3.99E-02 | transcription_start_site | - | 31946 | 31946 | 713   | 32242 | AN8547 |
| 2073 | CONTIG157 | 30901 | 31565 | 1.34 | 3.99E-02 | transcription_start_site | - | 30128 | 30128 | -1105 | 32246 | AN8547 |
| 570  | CONTIG157 | 33321 | 33575 | 2.35 | 5.64E-04 | transcription_start_site | + | 34000 | 34000 | -552  | 32247 | AN8548 |
| 570  | CONTIG157 | 33321 | 33575 | 2.35 | 5.64E-04 | transcription_start_site | + | 34223 | 34223 | -775  | 32248 | AN8548 |
| 570  | CONTIG157 | 33321 | 33575 | 2.35 | 5.64E-04 | transcription_start_site | + | 34479 | 34479 | -1031 | 32249 | AN8548 |
| 570  | CONTIG157 | 33321 | 33575 | 2.35 | 5.64E-04 | transcription_start_site | + | 34668 | 34668 | -1220 | 32250 | AN8548 |

|      |           |       |        |      |          |                          |   |        |        |       |       |        |
|------|-----------|-------|--------|------|----------|--------------------------|---|--------|--------|-------|-------|--------|
| 570  | CONTIG157 | 33321 | 33575  | 2.35 | 5.64E-04 | transcription_start_site | + | 34782  | 34782  | -1334 | 32251 | AN8548 |
| 570  | CONTIG157 | 33321 | 33575  | 2.35 | 5.64E-04 | transcription_start_site | + | 34912  | 34912  | -1464 | 32252 | AN8548 |
| 570  | CONTIG157 | 33321 | 33575  | 2.35 | 5.64E-04 | transcription_start_site | + | 35110  | 35110  | -1662 | 32253 | AN8548 |
| 2073 | CONTIG157 | 30901 | 31565  | 1.34 | 3.99E-02 | transcription_start_site | + | 34000  | 34000  | -2767 | 32247 | AN8548 |
| 2073 | CONTIG157 | 30901 | 31565  | 1.34 | 3.99E-02 | transcription_start_site | + | 34223  | 34223  | -2990 | 32248 | AN8548 |
| 2073 | CONTIG157 | 30901 | 31565  | 1.34 | 3.99E-02 | transcription_start_site | + | 34479  | 34479  | -3246 | 32249 | AN8548 |
| 2073 | CONTIG157 | 30901 | 31565  | 1.34 | 3.99E-02 | transcription_start_site | + | 34668  | 34668  | -3435 | 32250 | AN8548 |
| 2073 | CONTIG157 | 30901 | 31565  | 1.34 | 3.99E-02 | transcription_start_site | + | 34782  | 34782  | -3549 | 32251 | AN8548 |
| 2073 | CONTIG157 | 30901 | 31565  | 1.34 | 3.99E-02 | transcription_start_site | + | 34912  | 34912  | -3679 | 32252 | AN8548 |
| 2073 | CONTIG157 | 30901 | 31565  | 1.34 | 3.99E-02 | transcription_start_site | + | 35110  | 35110  | -3877 | 32253 | AN8548 |
| 2474 | CONTIG157 | 28821 | 29077  | 1.21 | 9.24E-02 | transcription_start_site | + | 34000  | 34000  | -5051 | 32247 | AN8548 |
| 506  | CONTIG157 | 38854 | 39203  | 2.43 | 2.16E-04 | transcription_start_site | + | 39766  | 39766  | -737  | 32254 | AN8549 |
| 2475 | CONTIG157 | 48392 | 48661  | 1.21 | 9.24E-02 | transcription_start_site | - | 44669  | 44669  | -3857 | 32255 | AN8550 |
| 2475 | CONTIG157 | 48392 | 48661  | 1.21 | 9.24E-02 | transcription_start_site | - | 43472  | 43472  | -5054 | 32256 | AN8550 |
| 700  | CONTIG157 | 51542 | 51893  | 2.19 | 1.22E-03 | transcription_start_site | - | 47722  | 47722  | -3995 | 32259 | AN8551 |
| 700  | CONTIG157 | 51542 | 51893  | 2.19 | 1.22E-03 | transcription_start_site | - | 47562  | 47562  | -4155 | 32260 | AN8551 |
| 2475 | CONTIG157 | 48392 | 48661  | 1.21 | 9.24E-02 | transcription_start_site | - | 47722  | 47722  | -804  | 32259 | AN8551 |
| 2475 | CONTIG157 | 48392 | 48661  | 1.21 | 9.24E-02 | transcription_start_site | - | 47562  | 47562  | -964  | 32260 | AN8551 |
| 2475 | CONTIG157 | 48392 | 48661  | 1.21 | 9.24E-02 | transcription_start_site | - | 46400  | 46400  | -2126 | 32261 | AN8551 |
| 2475 | CONTIG157 | 48392 | 48661  | 1.21 | 9.24E-02 | transcription_start_site | + | 48602  | 48602  | -75   | 32264 | AN8552 |
| 2475 | CONTIG157 | 48392 | 48661  | 1.21 | 9.24E-02 | transcription_start_site | + | 48371  | 48371  | 155   | 32263 | AN8552 |
| 2475 | CONTIG157 | 48392 | 48661  | 1.21 | 9.24E-02 | transcription_start_site | + | 48022  | 48022  | 504   | 32262 | AN8552 |
| 700  | CONTIG157 | 51542 | 51893  | 2.19 | 1.22E-03 | transcription_start_site | + | 51885  | 51885  | -167  | 32265 | AN8553 |
| 700  | CONTIG157 | 51542 | 51893  | 2.19 | 1.22E-03 | transcription_start_site | + | 52224  | 52224  | -506  | 32266 | AN8553 |
| 700  | CONTIG157 | 51542 | 51893  | 2.19 | 1.22E-03 | transcription_start_site | + | 52358  | 52358  | -640  | 32267 | AN8553 |
| 700  | CONTIG157 | 51542 | 51893  | 2.19 | 1.22E-03 | transcription_start_site | + | 52476  | 52476  | -758  | 32268 | AN8553 |
| 700  | CONTIG157 | 51542 | 51893  | 2.19 | 1.22E-03 | transcription_start_site | + | 52688  | 52688  | -970  | 32269 | AN8553 |
| 700  | CONTIG157 | 51542 | 51893  | 2.19 | 1.22E-03 | transcription_start_site | + | 52861  | 52861  | -1143 | 32270 | AN8553 |
| 700  | CONTIG157 | 51542 | 51893  | 2.19 | 1.22E-03 | transcription_start_site | + | 52996  | 52996  | -1278 | 32271 | AN8553 |
| 700  | CONTIG157 | 51542 | 51893  | 2.19 | 1.22E-03 | transcription_start_site | + | 53311  | 53311  | -1593 | 32272 | AN8553 |
| 700  | CONTIG157 | 51542 | 51893  | 2.19 | 1.22E-03 | transcription_start_site | + | 53557  | 53557  | -1839 | 32273 | AN8553 |
| 2475 | CONTIG157 | 48392 | 48661  | 1.21 | 9.24E-02 | transcription_start_site | + | 51885  | 51885  | -3358 | 32265 | AN8553 |
| 2475 | CONTIG157 | 48392 | 48661  | 1.21 | 9.24E-02 | transcription_start_site | + | 52224  | 52224  | -3697 | 32266 | AN8553 |
| 2475 | CONTIG157 | 48392 | 48661  | 1.21 | 9.24E-02 | transcription_start_site | + | 52358  | 52358  | -3831 | 32267 | AN8553 |
| 2475 | CONTIG157 | 48392 | 48661  | 1.21 | 9.24E-02 | transcription_start_site | + | 52476  | 52476  | -3949 | 32268 | AN8553 |
| 2475 | CONTIG157 | 48392 | 48661  | 1.21 | 9.24E-02 | transcription_start_site | + | 52688  | 52688  | -4161 | 32269 | AN8553 |
| 2475 | CONTIG157 | 48392 | 48661  | 1.21 | 9.24E-02 | transcription_start_site | + | 52861  | 52861  | -4334 | 32270 | AN8553 |
| 2475 | CONTIG157 | 48392 | 48661  | 1.21 | 9.24E-02 | transcription_start_site | + | 52996  | 52996  | -4469 | 32271 | AN8553 |
| 2475 | CONTIG157 | 48392 | 48661  | 1.21 | 9.24E-02 | transcription_start_site | + | 53311  | 53311  | -4784 | 32272 | AN8553 |
| 2475 | CONTIG157 | 48392 | 48661  | 1.21 | 9.24E-02 | transcription_start_site | + | 53557  | 53557  | -5030 | 32273 | AN8553 |
| 2829 | CONTIG157 | 65045 | 65454  | 1.05 | 1.50E-01 | transcription_start_site | - | 64320  | 64320  | -929  | 32288 | AN8557 |
| 2829 | CONTIG157 | 65045 | 65454  | 1.05 | 1.50E-01 | transcription_start_site | - | 63837  | 63837  | -1412 | 32289 | AN8557 |
| 2829 | CONTIG157 | 65045 | 65454  | 1.05 | 1.50E-01 | transcription_start_site | - | 63408  | 63408  | -1841 | 32290 | AN8557 |
| 2829 | CONTIG157 | 65045 | 65454  | 1.05 | 1.50E-01 | transcription_start_site | - | 62708  | 62708  | -2541 | 32291 | AN8557 |
| 2829 | CONTIG157 | 65045 | 65454  | 1.05 | 1.50E-01 | transcription_start_site | + | 65277  | 65277  | -27   | 32292 | AN8558 |
| 2829 | CONTIG157 | 65045 | 65454  | 1.05 | 1.50E-01 | transcription_start_site | + | 65804  | 65804  | -554  | 32293 | AN8558 |
| 307  | CONTIG157 | 90086 | 90520  | 2.75 | 0.00E+00 | transcription_start_site | - | 85398  | 85398  | -4905 | 32308 | AN8563 |
| 307  | CONTIG157 | 90086 | 90520  | 2.75 | 0.00E+00 | transcription_start_site | - | 87561  | 87561  | -2742 | 32310 | AN8564 |
| 307  | CONTIG157 | 90086 | 90520  | 2.75 | 0.00E+00 | transcription_start_site | - | 89857  | 89857  | -446  | 32311 | AN8565 |
| 307  | CONTIG157 | 90086 | 90520  | 2.75 | 0.00E+00 | transcription_start_site | + | 90507  | 90507  | -204  | 32312 | AN8566 |
| 307  | CONTIG157 | 90086 | 90520  | 2.75 | 0.00E+00 | transcription_start_site | + | 90816  | 90816  | -513  | 32313 | AN8566 |
| 1689 | CONTIG157 | 99921 | 100175 | 1.5  | 3.08E-02 | transcription_start_site | + | 100174 | 100174 | -126  | 32318 | AN8568 |
| 1689 | CONTIG157 | 99921 | 100175 | 1.5  | 3.08E-02 | transcription_start_site | + | 100757 | 100757 | -709  | 32319 | AN8568 |
| 1689 | CONTIG157 | 99921 | 100175 | 1.5  | 3.08E-02 | transcription_start_site | + | 103333 | 103333 | -3285 | 32322 | AN8570 |
| 1689 | CONTIG157 | 99921 | 100175 | 1.5  | 3.08E-02 | transcription_start_site | + | 103570 | 103570 | -3522 | 32323 | AN8570 |
| 1689 | CONTIG157 | 99921 | 100175 | 1.5  | 3.08E-02 | transcription_start_site | + | 104274 | 104274 | -4226 | 32324 | AN8570 |
| 1689 | CONTIG157 | 99921 | 100175 | 1.5  | 3.08E-02 | transcription_start_site | + | 104449 | 104449 | -4401 | 32325 | AN8570 |

|      |           |        |        |      |          |                          |   |        |        |       |       |        |
|------|-----------|--------|--------|------|----------|--------------------------|---|--------|--------|-------|-------|--------|
| 1421 | CONTIG157 | 130442 | 130860 | 1.62 | 1.84E-02 | transcription_start_site | + | 131046 | 131046 | -395  | 32365 | AN8577 |
| 1421 | CONTIG157 | 130442 | 130860 | 1.62 | 1.84E-02 | transcription_start_site | + | 131539 | 131539 | -888  | 32366 | AN8577 |
| 1421 | CONTIG157 | 130442 | 130860 | 1.62 | 1.84E-02 | transcription_start_site | + | 131768 | 131768 | -1117 | 32367 | AN8577 |
| 1421 | CONTIG157 | 130442 | 130860 | 1.62 | 1.84E-02 | transcription_start_site | + | 132184 | 132184 | -1533 | 32368 | AN8577 |
| 1421 | CONTIG157 | 130442 | 130860 | 1.62 | 1.84E-02 | transcription_start_site | + | 132633 | 132633 | -1982 | 32369 | AN8577 |
| 1421 | CONTIG157 | 130442 | 130860 | 1.62 | 1.84E-02 | transcription_start_site | + | 132784 | 132784 | -2133 | 32370 | AN8577 |
| 1421 | CONTIG157 | 130442 | 130860 | 1.62 | 1.84E-02 | transcription_start_site | + | 132985 | 132985 | -2334 | 32371 | AN8577 |
| 1421 | CONTIG157 | 130442 | 130860 | 1.62 | 1.84E-02 | transcription_start_site | + | 133266 | 133266 | -2615 | 32372 | AN8577 |
| 1421 | CONTIG157 | 130442 | 130860 | 1.62 | 1.84E-02 | transcription_start_site | + | 133587 | 133587 | -2936 | 32373 | AN8577 |
| 1421 | CONTIG157 | 130442 | 130860 | 1.62 | 1.84E-02 | transcription_start_site | + | 133959 | 133959 | -3308 | 32374 | AN8577 |
| 99   | CONTIG158 | 39465  | 39889  | 3.23 | 5.64E-04 | transcription_start_site | - | 36555  | 36555  | -3122 | 32403 | AN8588 |
| 99   | CONTIG158 | 39465  | 39889  | 3.23 | 5.64E-04 | transcription_start_site | - | 36507  | 36507  | -3170 | 32404 | AN8588 |
| 99   | CONTIG158 | 39465  | 39889  | 3.23 | 5.64E-04 | transcription_start_site | - | 36240  | 36240  | -3437 | 32405 | AN8588 |
| 99   | CONTIG158 | 39465  | 39889  | 3.23 | 5.64E-04 | transcription_start_site | - | 35589  | 35589  | -4088 | 32406 | AN8588 |
| 99   | CONTIG158 | 39465  | 39889  | 3.23 | 5.64E-04 | transcription_start_site | - | 35505  | 35505  | -4172 | 32407 | AN8588 |
| 99   | CONTIG158 | 39465  | 39889  | 3.23 | 5.64E-04 | transcription_start_site | - | 35262  | 35262  | -4415 | 32408 | AN8588 |
| 251  | CONTIG158 | 40446  | 40700  | 2.84 | 2.22E-03 | transcription_start_site | - | 36555  | 36555  | -4018 | 32403 | AN8588 |
| 251  | CONTIG158 | 40446  | 40700  | 2.84 | 2.22E-03 | transcription_start_site | - | 36507  | 36507  | -4066 | 32404 | AN8588 |
| 251  | CONTIG158 | 40446  | 40700  | 2.84 | 2.22E-03 | transcription_start_site | - | 36240  | 36240  | -4333 | 32405 | AN8588 |
| 251  | CONTIG158 | 40446  | 40700  | 2.84 | 2.22E-03 | transcription_start_site | - | 35589  | 35589  | -4984 | 32406 | AN8588 |
| 251  | CONTIG158 | 40446  | 40700  | 2.84 | 2.22E-03 | transcription_start_site | - | 35505  | 35505  | -5068 | 32407 | AN8588 |
| 1566 | CONTIG158 | 34517  | 34866  | 1.56 | 1.07E-01 | transcription_start_site | - | 34295  | 34295  | -396  | 32409 | AN8588 |
| 1566 | CONTIG158 | 34517  | 34866  | 1.56 | 1.07E-01 | transcription_start_site | - | 35262  | 35262  | 570   | 32408 | AN8588 |
| 1566 | CONTIG158 | 34517  | 34866  | 1.56 | 1.07E-01 | transcription_start_site | - | 33984  | 33984  | -707  | 32410 | AN8588 |
| 1566 | CONTIG158 | 34517  | 34866  | 1.56 | 1.07E-01 | transcription_start_site | - | 35505  | 35505  | 813   | 32407 | AN8588 |
| 1566 | CONTIG158 | 34517  | 34866  | 1.56 | 1.07E-01 | transcription_start_site | - | 33810  | 33810  | -881  | 32411 | AN8588 |
| 1566 | CONTIG158 | 34517  | 34866  | 1.56 | 1.07E-01 | transcription_start_site | - | 35589  | 35589  | 897   | 32406 | AN8588 |
| 1566 | CONTIG158 | 34517  | 34866  | 1.56 | 1.07E-01 | transcription_start_site | + | 36918  | 36918  | -2226 | 32412 | AN8589 |
| 1566 | CONTIG158 | 34517  | 34866  | 1.56 | 1.07E-01 | transcription_start_site | + | 37161  | 37161  | -2469 | 32413 | AN8589 |
| 1566 | CONTIG158 | 34517  | 34866  | 1.56 | 1.07E-01 | transcription_start_site | + | 37768  | 37768  | -3076 | 32414 | AN8589 |
| 99   | CONTIG158 | 39465  | 39889  | 3.23 | 5.64E-04 | transcription_start_site | + | 40301  | 40301  | -624  | 32415 | AN8590 |
| 99   | CONTIG158 | 39465  | 39889  | 3.23 | 5.64E-04 | transcription_start_site | + | 41337  | 41337  | -1660 | 32416 | AN8590 |
| 251  | CONTIG158 | 40446  | 40700  | 2.84 | 2.22E-03 | transcription_start_site | + | 40301  | 40301  | 272   | 32415 | AN8590 |
| 251  | CONTIG158 | 40446  | 40700  | 2.84 | 2.22E-03 | transcription_start_site | + | 41337  | 41337  | -764  | 32416 | AN8590 |
| 1567 | CONTIG158 | 42306  | 42651  | 1.56 | 1.25E-01 | transcription_start_site | + | 41337  | 41337  | 1141  | 32416 | AN8590 |
| 1567 | CONTIG158 | 42306  | 42651  | 1.56 | 1.25E-01 | transcription_start_site | - | 43493  | 43493  | 1014  | 32420 | AN8591 |
| 1567 | CONTIG158 | 42306  | 42651  | 1.56 | 1.25E-01 | transcription_start_site | - | 43645  | 43645  | 1166  | 32419 | AN8591 |
| 251  | CONTIG158 | 40446  | 40700  | 2.84 | 2.22E-03 | transcription_start_site | + | 45222  | 45222  | -4649 | 32421 | AN8592 |
| 251  | CONTIG158 | 40446  | 40700  | 2.84 | 2.22E-03 | transcription_start_site | + | 45516  | 45516  | -4943 | 32422 | AN8592 |
| 1567 | CONTIG158 | 42306  | 42651  | 1.56 | 1.25E-01 | transcription_start_site | + | 45222  | 45222  | -2743 | 32421 | AN8592 |
| 1567 | CONTIG158 | 42306  | 42651  | 1.56 | 1.25E-01 | transcription_start_site | + | 45516  | 45516  | -3037 | 32422 | AN8592 |
| 1567 | CONTIG158 | 42306  | 42651  | 1.56 | 1.25E-01 | transcription_start_site | + | 46004  | 46004  | -3525 | 32423 | AN8592 |
| 1567 | CONTIG158 | 42306  | 42651  | 1.56 | 1.25E-01 | transcription_start_site | + | 46290  | 46290  | -3811 | 32424 | AN8592 |
| 1567 | CONTIG158 | 42306  | 42651  | 1.56 | 1.25E-01 | transcription_start_site | + | 46375  | 46375  | -3896 | 32425 | AN8592 |
| 2095 | CONTIG158 | 53412  | 54507  | 1.34 | 1.64E-01 | transcription_start_site | - | 49470  | 49470  | -4489 | 32426 | AN8593 |
| 2095 | CONTIG158 | 53412  | 54507  | 1.34 | 1.64E-01 | transcription_start_site | - | 49066  | 49066  | -4893 | 32427 | AN8593 |
| 2095 | CONTIG158 | 53412  | 54507  | 1.34 | 1.64E-01 | transcription_start_site | - | 48771  | 48771  | -5188 | 32428 | AN8593 |
| 2095 | CONTIG158 | 53412  | 54507  | 1.34 | 1.64E-01 | transcription_start_site | + | 54148  | 54148  | -188  | 32429 | AN8595 |
| 2095 | CONTIG158 | 53412  | 54507  | 1.34 | 1.64E-01 | transcription_start_site | + | 54434  | 54434  | -474  | 32430 | AN8595 |
| 2095 | CONTIG158 | 53412  | 54507  | 1.34 | 1.64E-01 | transcription_start_site | + | 54618  | 54618  | -658  | 32431 | AN8595 |
| 2095 | CONTIG158 | 53412  | 54507  | 1.34 | 1.64E-01 | transcription_start_site | + | 54954  | 54954  | -994  | 32432 | AN8595 |
| 2095 | CONTIG158 | 53412  | 54507  | 1.34 | 1.64E-01 | transcription_start_site | + | 55221  | 55221  | -1261 | 32433 | AN8595 |
| 2095 | CONTIG158 | 53412  | 54507  | 1.34 | 1.64E-01 | transcription_start_site | + | 55777  | 55777  | -1817 | 32434 | AN8595 |
| 2095 | CONTIG158 | 53412  | 54507  | 1.34 | 1.64E-01 | transcription_start_site | + | 58695  | 58695  | -4735 | 32439 | AN8597 |
| 2095 | CONTIG158 | 53412  | 54507  | 1.34 | 1.64E-01 | transcription_start_site | + | 58892  | 58892  | -4932 | 32440 | AN8597 |
| 2095 | CONTIG158 | 53412  | 54507  | 1.34 | 1.64E-01 | transcription_start_site | + | 59047  | 59047  | -5087 | 32441 | AN8597 |
| 2095 | CONTIG158 | 53412  | 54507  | 1.34 | 1.64E-01 | transcription_start_site | + | 59195  | 59195  | -5235 | 32442 | AN8597 |

|      |           |        |        |      |          |                          |   |        |        |       |       |        |
|------|-----------|--------|--------|------|----------|--------------------------|---|--------|--------|-------|-------|--------|
| 962  | CONTIG158 | 76127  | 76401  | 1.95 | 4.36E-02 | transcription_start_site | - | 75920  | 75920  | -344  | 32451 | AN8603 |
| 962  | CONTIG158 | 76127  | 76401  | 1.95 | 4.36E-02 | transcription_start_site | - | 77099  | 77099  | 835   | 32450 | AN8603 |
| 962  | CONTIG158 | 76127  | 76401  | 1.95 | 4.36E-02 | transcription_start_site | - | 77285  | 77285  | 1021  | 32449 | AN8603 |
| 1097 | CONTIG158 | 77032  | 77536  | 1.84 | 5.88E-02 | transcription_start_site | - | 77285  | 77285  | 1     | 32449 | AN8603 |
| 1097 | CONTIG158 | 77032  | 77536  | 1.84 | 5.88E-02 | transcription_start_site | - | 77099  | 77099  | -185  | 32450 | AN8603 |
| 1097 | CONTIG158 | 77032  | 77536  | 1.84 | 5.88E-02 | transcription_start_site | - | 75920  | 75920  | -1364 | 32451 | AN8603 |
| 1250 | CONTIG158 | 84454  | 85783  | 1.73 | 8.01E-02 | transcription_start_site | - | 79882  | 79882  | -5236 | 32452 | AN8604 |
| 1250 | CONTIG158 | 84454  | 85783  | 1.73 | 8.01E-02 | transcription_start_site | - | 80921  | 80921  | -4197 | 32453 | AN8605 |
| 1250 | CONTIG158 | 84454  | 85783  | 1.73 | 8.01E-02 | transcription_start_site | - | 80834  | 80834  | -4284 | 32454 | AN8605 |
| 1250 | CONTIG158 | 84454  | 85783  | 1.73 | 8.01E-02 | transcription_start_site | - | 80604  | 80604  | -4514 | 32455 | AN8605 |
| 1250 | CONTIG158 | 84454  | 85783  | 1.73 | 8.01E-02 | transcription_start_site | - | 80418  | 80418  | -4700 | 32456 | AN8605 |
| 1250 | CONTIG158 | 84454  | 85783  | 1.73 | 8.01E-02 | transcription_start_site | + | 84449  | 84449  | 669   | 32458 | AN8606 |
| 1250 | CONTIG158 | 84454  | 85783  | 1.73 | 8.01E-02 | transcription_start_site | + | 83954  | 83954  | 1164  | 32457 | AN8606 |
| 352  | CONTIG158 | 86194  | 87058  | 2.68 | 1.22E-03 | transcription_start_site | - | 85834  | 85834  | -792  | 32459 | AN8607 |
| 352  | CONTIG158 | 86194  | 87058  | 2.68 | 1.22E-03 | transcription_start_site | - | 85094  | 85094  | -1532 | 32460 | AN8607 |
| 1250 | CONTIG158 | 84454  | 85783  | 1.73 | 8.01E-02 | transcription_start_site | - | 85094  | 85094  | -24   | 32460 | AN8607 |
| 1250 | CONTIG158 | 84454  | 85783  | 1.73 | 8.01E-02 | transcription_start_site | - | 85834  | 85834  | 715   | 32459 | AN8607 |
| 352  | CONTIG158 | 86194  | 87058  | 2.68 | 1.22E-03 | transcription_start_site | + | 89084  | 89084  | -2458 | 32461 | AN8608 |
| 352  | CONTIG158 | 86194  | 87058  | 2.68 | 1.22E-03 | transcription_start_site | + | 89225  | 89225  | -2599 | 32462 | AN8608 |
| 352  | CONTIG158 | 86194  | 87058  | 2.68 | 1.22E-03 | transcription_start_site | + | 89500  | 89500  | -2874 | 32463 | AN8608 |
| 1250 | CONTIG158 | 84454  | 85783  | 1.73 | 8.01E-02 | transcription_start_site | + | 89084  | 89084  | -3965 | 32461 | AN8608 |
| 1250 | CONTIG158 | 84454  | 85783  | 1.73 | 8.01E-02 | transcription_start_site | + | 89225  | 89225  | -4106 | 32462 | AN8608 |
| 1250 | CONTIG158 | 84454  | 85783  | 1.73 | 8.01E-02 | transcription_start_site | + | 89500  | 89500  | -4381 | 32463 | AN8608 |
| 1342 | CONTIG158 | 112664 | 112943 | 1.67 | 9.24E-02 | transcription_start_site | - | 112420 | 112420 | -383  | 32475 | AN8615 |
| 1342 | CONTIG158 | 112664 | 112943 | 1.67 | 9.24E-02 | transcription_start_site | - | 112027 | 112027 | -776  | 32476 | AN8615 |
| 1342 | CONTIG158 | 112664 | 112943 | 1.67 | 9.24E-02 | transcription_start_site | - | 111781 | 111781 | -1022 | 32477 | AN8615 |
| 1342 | CONTIG158 | 112664 | 112943 | 1.67 | 9.24E-02 | transcription_start_site | - | 111555 | 111555 | -1248 | 32478 | AN8615 |
| 1342 | CONTIG158 | 112664 | 112943 | 1.67 | 9.24E-02 | transcription_start_site | - | 111332 | 111332 | -1471 | 32479 | AN8615 |
| 1342 | CONTIG158 | 112664 | 112943 | 1.67 | 9.24E-02 | transcription_start_site | - | 110948 | 110948 | -1855 | 32480 | AN8615 |
| 1342 | CONTIG158 | 112664 | 112943 | 1.67 | 9.24E-02 | transcription_start_site | - | 110777 | 110777 | -2026 | 32481 | AN8615 |
| 1342 | CONTIG158 | 112664 | 112943 | 1.67 | 9.24E-02 | transcription_start_site | - | 110543 | 110543 | -2260 | 32482 | AN8615 |
| 1342 | CONTIG158 | 112664 | 112943 | 1.67 | 9.24E-02 | transcription_start_site | - | 110326 | 110326 | -2477 | 32483 | AN8615 |
| 1342 | CONTIG158 | 112664 | 112943 | 1.67 | 9.24E-02 | transcription_start_site | + | 117137 | 117137 | -4333 | 32486 | AN8618 |
| 579  | CONTIG158 | 143338 | 143621 | 2.34 | 1.30E-02 | transcription_start_site | - | 143344 | 143344 | -135  | 32523 | AN8627 |
| 784  | CONTIG158 | 144677 | 145036 | 2.12 | 2.62E-02 | transcription_start_site | - | 143344 | 143344 | -1512 | 32523 | AN8627 |
| 579  | CONTIG158 | 143338 | 143621 | 2.34 | 1.30E-02 | transcription_start_site | - | 144613 | 144613 | 1133  | 32524 | AN8628 |
| 784  | CONTIG158 | 144677 | 145036 | 2.12 | 2.62E-02 | transcription_start_site | - | 144613 | 144613 | -243  | 32524 | AN8628 |
| 963  | CONTIG158 | 169127 | 169479 | 1.95 | 4.36E-02 | transcription_start_site | - | 168850 | 168850 | -453  | 32548 | AN8636 |
| 963  | CONTIG158 | 169127 | 169479 | 1.95 | 4.36E-02 | transcription_start_site | - | 168584 | 168584 | -719  | 32549 | AN8636 |
| 963  | CONTIG158 | 169127 | 169479 | 1.95 | 4.36E-02 | transcription_start_site | - | 167992 | 167992 | -1311 | 32550 | AN8636 |
| 963  | CONTIG158 | 169127 | 169479 | 1.95 | 4.36E-02 | transcription_start_site | - | 167782 | 167782 | -1521 | 32551 | AN8636 |
| 963  | CONTIG158 | 169127 | 169479 | 1.95 | 4.36E-02 | transcription_start_site | - | 167563 | 167563 | -1740 | 32552 | AN8636 |
| 963  | CONTIG158 | 169127 | 169479 | 1.95 | 4.36E-02 | transcription_start_site | - | 167170 | 167170 | -2133 | 32553 | AN8636 |
| 1710 | CONTIG158 | 169889 | 170458 | 1.5  | 1.28E-01 | transcription_start_site | - | 168850 | 168850 | -1323 | 32548 | AN8636 |
| 1710 | CONTIG158 | 169889 | 170458 | 1.5  | 1.28E-01 | transcription_start_site | - | 168584 | 168584 | -1589 | 32549 | AN8636 |
| 1710 | CONTIG158 | 169889 | 170458 | 1.5  | 1.28E-01 | transcription_start_site | - | 167992 | 167992 | -2181 | 32550 | AN8636 |
| 1710 | CONTIG158 | 169889 | 170458 | 1.5  | 1.28E-01 | transcription_start_site | - | 167782 | 167782 | -2391 | 32551 | AN8636 |
| 1710 | CONTIG158 | 169889 | 170458 | 1.5  | 1.28E-01 | transcription_start_site | - | 167563 | 167563 | -2610 | 32552 | AN8636 |
| 1710 | CONTIG158 | 169889 | 170458 | 1.5  | 1.28E-01 | transcription_start_site | - | 167170 | 167170 | -3003 | 32553 | AN8636 |
| 1966 | CONTIG158 | 173114 | 173453 | 1.39 | 1.93E-01 | transcription_start_site | - | 168850 | 168850 | -4433 | 32548 | AN8636 |
| 1966 | CONTIG158 | 173114 | 173453 | 1.39 | 1.93E-01 | transcription_start_site | - | 168584 | 168584 | -4699 | 32549 | AN8636 |
| 1095 | CONTIG158 | 178519 | 179024 | 1.84 | 3.61E-02 | transcription_start_site | - | 174550 | 174550 | -4221 | 32554 | AN8637 |
| 1095 | CONTIG158 | 178519 | 179024 | 1.84 | 3.61E-02 | transcription_start_site | - | 173954 | 173954 | -4817 | 32555 | AN8637 |
| 1178 | CONTIG158 | 174769 | 175115 | 1.78 | 6.84E-02 | transcription_start_site | - | 174550 | 174550 | -392  | 32554 | AN8637 |
| 1178 | CONTIG158 | 174769 | 175115 | 1.78 | 6.84E-02 | transcription_start_site | - | 173954 | 173954 | -988  | 32555 | AN8637 |
| 1966 | CONTIG158 | 173114 | 173453 | 1.39 | 1.93E-01 | transcription_start_site | - | 173954 | 173954 | 670   | 32555 | AN8637 |
| 1178 | CONTIG158 | 174769 | 175115 | 1.78 | 6.84E-02 | transcription_start_site | + | 175148 | 175148 | -206  | 32556 | AN8638 |



|                |        |        |      |          |                          |   |        |        |       |       |        |
|----------------|--------|--------|------|----------|--------------------------|---|--------|--------|-------|-------|--------|
| 1178 CONTIG158 | 174769 | 175115 | 1.78 | 6.84E-02 | transcription_start_site | + | 175536 | 175536 | -594  | 32557 | AN8638 |
| 1710 CONTIG158 | 169889 | 170458 | 1.5  | 1.28E-01 | transcription_start_site | + | 175148 | 175148 | -4974 | 32556 | AN8638 |
| 1966 CONTIG158 | 173114 | 173453 | 1.39 | 1.93E-01 | transcription_start_site | + | 175148 | 175148 | -1864 | 32556 | AN8638 |
| 1966 CONTIG158 | 173114 | 173453 | 1.39 | 1.93E-01 | transcription_start_site | + | 175536 | 175536 | -2252 | 32557 | AN8638 |
| 170 CONTIG158  | 181814 | 182164 | 3.01 | 1.22E-03 | transcription_start_site | - | 178347 | 178347 | -3642 | 32558 | AN8639 |
| 170 CONTIG158  | 181814 | 182164 | 3.01 | 1.22E-03 | transcription_start_site | - | 178000 | 178000 | -3989 | 32559 | AN8639 |
| 170 CONTIG158  | 181814 | 182164 | 3.01 | 1.22E-03 | transcription_start_site | - | 177185 | 177185 | -4804 | 32560 | AN8639 |
| 580 CONTIG158  | 179704 | 180229 | 2.34 | 1.30E-02 | transcription_start_site | - | 178347 | 178347 | -1619 | 32558 | AN8639 |
| 580 CONTIG158  | 179704 | 180229 | 2.34 | 1.30E-02 | transcription_start_site | - | 178000 | 178000 | -1966 | 32559 | AN8639 |
| 580 CONTIG158  | 179704 | 180229 | 2.34 | 1.30E-02 | transcription_start_site | - | 177185 | 177185 | -2781 | 32560 | AN8639 |
| 1095 CONTIG158 | 178519 | 179024 | 1.84 | 3.61E-02 | transcription_start_site | - | 178347 | 178347 | -424  | 32558 | AN8639 |
| 1095 CONTIG158 | 178519 | 179024 | 1.84 | 3.61E-02 | transcription_start_site | - | 178000 | 178000 | -771  | 32559 | AN8639 |
| 1095 CONTIG158 | 178519 | 179024 | 1.84 | 3.61E-02 | transcription_start_site | - | 177185 | 177185 | -1586 | 32560 | AN8639 |
| 580 CONTIG158  | 179704 | 180229 | 2.34 | 1.30E-02 | transcription_start_site | + | 179329 | 179329 | 637   | 32563 | AN8640 |
| 580 CONTIG158  | 179704 | 180229 | 2.34 | 1.30E-02 | transcription_start_site | + | 179113 | 179113 | 853   | 32562 | AN8640 |
| 580 CONTIG158  | 179704 | 180229 | 2.34 | 1.30E-02 | transcription_start_site | + | 179014 | 179014 | 952   | 32561 | AN8640 |
| 1095 CONTIG158 | 178519 | 179024 | 1.84 | 3.61E-02 | transcription_start_site | + | 179014 | 179014 | -242  | 32561 | AN8640 |
| 1095 CONTIG158 | 178519 | 179024 | 1.84 | 3.61E-02 | transcription_start_site | + | 179113 | 179113 | -341  | 32562 | AN8640 |
| 1095 CONTIG158 | 178519 | 179024 | 1.84 | 3.61E-02 | transcription_start_site | + | 179329 | 179329 | -557  | 32563 | AN8640 |
| 1178 CONTIG158 | 174769 | 175115 | 1.78 | 6.84E-02 | transcription_start_site | + | 179014 | 179014 | -4072 | 32561 | AN8640 |
| 1178 CONTIG158 | 174769 | 175115 | 1.78 | 6.84E-02 | transcription_start_site | + | 179113 | 179113 | -4171 | 32562 | AN8640 |
| 1178 CONTIG158 | 174769 | 175115 | 1.78 | 6.84E-02 | transcription_start_site | + | 179329 | 179329 | -4387 | 32563 | AN8640 |
| 580 CONTIG158  | 179704 | 180229 | 2.34 | 1.30E-02 | transcription_start_site | + | 179901 | 179901 | 65    | 32565 | AN8641 |
| 580 CONTIG158  | 179704 | 180229 | 2.34 | 1.30E-02 | transcription_start_site | + | 179726 | 179726 | 240   | 32564 | AN8641 |
| 1095 CONTIG158 | 178519 | 179024 | 1.84 | 3.61E-02 | transcription_start_site | + | 179726 | 179726 | -954  | 32564 | AN8641 |
| 1095 CONTIG158 | 178519 | 179024 | 1.84 | 3.61E-02 | transcription_start_site | + | 179901 | 179901 | -1129 | 32565 | AN8641 |
| 1178 CONTIG158 | 174769 | 175115 | 1.78 | 6.84E-02 | transcription_start_site | + | 179726 | 179726 | -4784 | 32564 | AN8641 |
| 1178 CONTIG158 | 174769 | 175115 | 1.78 | 6.84E-02 | transcription_start_site | + | 179901 | 179901 | -4959 | 32565 | AN8641 |
| 170 CONTIG158  | 181814 | 182164 | 3.01 | 1.22E-03 | transcription_start_site | + | 181228 | 181228 | 761   | 32568 | AN8642 |
| 170 CONTIG158  | 181814 | 182164 | 3.01 | 1.22E-03 | transcription_start_site | + | 180853 | 180853 | 1136  | 32567 | AN8642 |
| 580 CONTIG158  | 179704 | 180229 | 2.34 | 1.30E-02 | transcription_start_site | + | 180666 | 180666 | -699  | 32566 | AN8642 |
| 580 CONTIG158  | 179704 | 180229 | 2.34 | 1.30E-02 | transcription_start_site | + | 180853 | 180853 | -886  | 32567 | AN8642 |
| 580 CONTIG158  | 179704 | 180229 | 2.34 | 1.30E-02 | transcription_start_site | + | 181228 | 181228 | -1261 | 32568 | AN8642 |
| 1095 CONTIG158 | 178519 | 179024 | 1.84 | 3.61E-02 | transcription_start_site | + | 180666 | 180666 | -1894 | 32566 | AN8642 |
| 1095 CONTIG158 | 178519 | 179024 | 1.84 | 3.61E-02 | transcription_start_site | + | 180853 | 180853 | -2081 | 32567 | AN8642 |
| 1095 CONTIG158 | 178519 | 179024 | 1.84 | 3.61E-02 | transcription_start_site | + | 181228 | 181228 | -2456 | 32568 | AN8642 |
| 168 CONTIG158  | 184054 | 184868 | 3.01 | 0.00E+00 | transcription_start_site | - | 183418 | 183418 | -1043 | 32569 | AN8643 |
| 427 CONTIG158  | 186694 | 187028 | 2.56 | 6.61E-03 | transcription_start_site | - | 183418 | 183418 | -3443 | 32569 | AN8643 |
| 533 CONTIG158  | 186014 | 186428 | 2.4  | 4.81E-03 | transcription_start_site | - | 183418 | 183418 | -2803 | 32569 | AN8643 |
| 168 CONTIG158  | 184054 | 184868 | 3.01 | 0.00E+00 | transcription_start_site | + | 187186 | 187186 | -2725 | 32570 | AN8644 |
| 168 CONTIG158  | 184054 | 184868 | 3.01 | 0.00E+00 | transcription_start_site | + | 187945 | 187945 | -3484 | 32571 | AN8644 |
| 168 CONTIG158  | 184054 | 184868 | 3.01 | 0.00E+00 | transcription_start_site | + | 188435 | 188435 | -3974 | 32572 | AN8644 |
| 427 CONTIG158  | 186694 | 187028 | 2.56 | 6.61E-03 | transcription_start_site | + | 187186 | 187186 | -325  | 32570 | AN8644 |
| 427 CONTIG158  | 186694 | 187028 | 2.56 | 6.61E-03 | transcription_start_site | + | 187945 | 187945 | -1084 | 32571 | AN8644 |
| 427 CONTIG158  | 186694 | 187028 | 2.56 | 6.61E-03 | transcription_start_site | + | 188435 | 188435 | -1574 | 32572 | AN8644 |
| 533 CONTIG158  | 186014 | 186428 | 2.4  | 4.81E-03 | transcription_start_site | + | 187186 | 187186 | -965  | 32570 | AN8644 |
| 533 CONTIG158  | 186014 | 186428 | 2.4  | 4.81E-03 | transcription_start_site | + | 187945 | 187945 | -1724 | 32571 | AN8644 |
| 533 CONTIG158  | 186014 | 186428 | 2.4  | 4.81E-03 | transcription_start_site | + | 188435 | 188435 | -2214 | 32572 | AN8644 |
| 1096 CONTIG158 | 219093 | 219727 | 1.84 | 3.61E-02 | transcription_start_site | - | 214302 | 214302 | -5108 | 32587 | AN8650 |
| 1096 CONTIG158 | 219093 | 219727 | 1.84 | 3.61E-02 | transcription_start_site | - | 214183 | 214183 | -5227 | 32588 | AN8650 |
| 1096 CONTIG158 | 219093 | 219727 | 1.84 | 3.61E-02 | transcription_start_site | + | 219370 | 219370 | 40    | 32592 | AN8652 |
| 1096 CONTIG158 | 219093 | 219727 | 1.84 | 3.61E-02 | transcription_start_site | + | 219173 | 219173 | 237   | 32591 | AN8652 |
| 1096 CONTIG158 | 219093 | 219727 | 1.84 | 3.61E-02 | transcription_start_site | + | 219673 | 219673 | -263  | 32593 | AN8652 |
| 1096 CONTIG158 | 219093 | 219727 | 1.84 | 3.61E-02 | transcription_start_site | + | 220303 | 220303 | -893  | 32594 | AN8652 |
| 1096 CONTIG158 | 219093 | 219727 | 1.84 | 3.61E-02 | transcription_start_site | + | 220648 | 220648 | -1238 | 32595 | AN8652 |
| 1096 CONTIG158 | 219093 | 219727 | 1.84 | 3.61E-02 | transcription_start_site | + | 222140 | 222140 | -2730 | 32596 | AN8653 |
| 1096 CONTIG158 | 219093 | 219727 | 1.84 | 3.61E-02 | transcription_start_site | + | 222484 | 222484 | -3074 | 32597 | AN8653 |

|      |           |        |        |      |          |                          |   |        |        |       |       |        |
|------|-----------|--------|--------|------|----------|--------------------------|---|--------|--------|-------|-------|--------|
| 1096 | CONTIG158 | 219093 | 219727 | 1.84 | 3.61E-02 | transcription_start_site | + | 223899 | 223899 | -4489 | 32598 | AN8653 |
| 1096 | CONTIG158 | 219093 | 219727 | 1.84 | 3.61E-02 | transcription_start_site | + | 224077 | 224077 | -4667 | 32599 | AN8653 |
| 733  | CONTIG158 | 225453 | 227689 | 2.17 | 1.06E-02 | transcription_start_site | - | 227019 | 227019 | 448   | 32604 | AN8654 |
| 733  | CONTIG158 | 225453 | 227689 | 2.17 | 1.06E-02 | transcription_start_site | - | 227404 | 227404 | 833   | 32603 | AN8654 |
| 733  | CONTIG158 | 225453 | 227689 | 2.17 | 1.06E-02 | transcription_start_site | - | 227642 | 227642 | 1071  | 32602 | AN8654 |
| 733  | CONTIG158 | 225453 | 227689 | 2.17 | 1.06E-02 | transcription_start_site | - | 227936 | 227936 | 1365  | 32601 | AN8654 |
| 733  | CONTIG158 | 225453 | 227689 | 2.17 | 1.06E-02 | transcription_start_site | - | 228141 | 228141 | 1570  | 32600 | AN8654 |
| 1440 | CONTIG158 | 232659 | 233013 | 1.62 | 1.08E-01 | transcription_start_site | - | 228141 | 228141 | -4695 | 32600 | AN8654 |
| 1440 | CONTIG158 | 232659 | 233013 | 1.62 | 1.08E-01 | transcription_start_site | - | 227936 | 227936 | -4900 | 32601 | AN8654 |
| 1703 | CONTIG158 | 231320 | 232194 | 1.5  | 1.01E-01 | transcription_start_site | - | 228141 | 228141 | -3616 | 32600 | AN8654 |
| 1703 | CONTIG158 | 231320 | 232194 | 1.5  | 1.01E-01 | transcription_start_site | - | 227936 | 227936 | -3821 | 32601 | AN8654 |
| 1703 | CONTIG158 | 231320 | 232194 | 1.5  | 1.01E-01 | transcription_start_site | - | 227642 | 227642 | -4115 | 32602 | AN8654 |
| 1703 | CONTIG158 | 231320 | 232194 | 1.5  | 1.01E-01 | transcription_start_site | - | 227404 | 227404 | -4353 | 32603 | AN8654 |
| 1703 | CONTIG158 | 231320 | 232194 | 1.5  | 1.01E-01 | transcription_start_site | - | 227019 | 227019 | -4738 | 32604 | AN8654 |
| 1440 | CONTIG158 | 232659 | 233013 | 1.62 | 1.08E-01 | transcription_start_site | - | 231342 | 231342 | -1494 | 32605 | AN8655 |
| 1440 | CONTIG158 | 232659 | 233013 | 1.62 | 1.08E-01 | transcription_start_site | - | 231019 | 231019 | -1817 | 32606 | AN8655 |
| 1440 | CONTIG158 | 232659 | 233013 | 1.62 | 1.08E-01 | transcription_start_site | - | 230909 | 230909 | -1927 | 32607 | AN8655 |
| 1440 | CONTIG158 | 232659 | 233013 | 1.62 | 1.08E-01 | transcription_start_site | - | 230460 | 230460 | -2376 | 32608 | AN8655 |
| 1440 | CONTIG158 | 232659 | 233013 | 1.62 | 1.08E-01 | transcription_start_site | - | 229373 | 229373 | -3463 | 32609 | AN8655 |
| 1703 | CONTIG158 | 231320 | 232194 | 1.5  | 1.01E-01 | transcription_start_site | - | 231342 | 231342 | -415  | 32605 | AN8655 |
| 1703 | CONTIG158 | 231320 | 232194 | 1.5  | 1.01E-01 | transcription_start_site | - | 231019 | 231019 | -738  | 32606 | AN8655 |
| 1703 | CONTIG158 | 231320 | 232194 | 1.5  | 1.01E-01 | transcription_start_site | - | 230909 | 230909 | -848  | 32607 | AN8655 |
| 1703 | CONTIG158 | 231320 | 232194 | 1.5  | 1.01E-01 | transcription_start_site | - | 230460 | 230460 | -1297 | 32608 | AN8655 |
| 1703 | CONTIG158 | 231320 | 232194 | 1.5  | 1.01E-01 | transcription_start_site | - | 229373 | 229373 | -2384 | 32609 | AN8655 |
| 1440 | CONTIG158 | 232659 | 233013 | 1.62 | 1.08E-01 | transcription_start_site | - | 232573 | 232573 | -263  | 32611 | AN8656 |
| 1440 | CONTIG158 | 232659 | 233013 | 1.62 | 1.08E-01 | transcription_start_site | - | 233506 | 233506 | 670   | 32610 | AN8656 |
| 1703 | CONTIG158 | 231320 | 232194 | 1.5  | 1.01E-01 | transcription_start_site | - | 232573 | 232573 | 816   | 32611 | AN8656 |
| 1440 | CONTIG158 | 232659 | 233013 | 1.62 | 1.08E-01 | transcription_start_site | + | 233687 | 233687 | -851  | 32612 | AN8657 |
| 1440 | CONTIG158 | 232659 | 233013 | 1.62 | 1.08E-01 | transcription_start_site | + | 234307 | 234307 | -1471 | 32613 | AN8657 |
| 1440 | CONTIG158 | 232659 | 233013 | 1.62 | 1.08E-01 | transcription_start_site | + | 234644 | 234644 | -1808 | 32614 | AN8657 |
| 1440 | CONTIG158 | 232659 | 233013 | 1.62 | 1.08E-01 | transcription_start_site | + | 235851 | 235851 | -3015 | 32615 | AN8657 |
| 1703 | CONTIG158 | 231320 | 232194 | 1.5  | 1.01E-01 | transcription_start_site | + | 233687 | 233687 | -1930 | 32612 | AN8657 |
| 1703 | CONTIG158 | 231320 | 232194 | 1.5  | 1.01E-01 | transcription_start_site | + | 234307 | 234307 | -2550 | 32613 | AN8657 |
| 1703 | CONTIG158 | 231320 | 232194 | 1.5  | 1.01E-01 | transcription_start_site | + | 234644 | 234644 | -2887 | 32614 | AN8657 |
| 1703 | CONTIG158 | 231320 | 232194 | 1.5  | 1.01E-01 | transcription_start_site | + | 235851 | 235851 | -4094 | 32615 | AN8657 |
| 1440 | CONTIG158 | 232659 | 233013 | 1.62 | 1.08E-01 | transcription_start_site | + | 237542 | 237542 | -4706 | 32616 | AN8658 |
| 1440 | CONTIG158 | 232659 | 233013 | 1.62 | 1.08E-01 | transcription_start_site | + | 237889 | 237889 | -5053 | 32617 | AN8658 |
| 1098 | CONTIG158 | 247053 | 248312 | 1.84 | 5.88E-02 | transcription_start_site | - | 245814 | 245814 | -1868 | 32626 | AN8660 |
| 1098 | CONTIG158 | 247053 | 248312 | 1.84 | 5.88E-02 | transcription_start_site | - | 245740 | 245740 | -1942 | 32627 | AN8660 |
| 1098 | CONTIG158 | 247053 | 248312 | 1.84 | 5.88E-02 | transcription_start_site | - | 243583 | 243583 | -4099 | 32628 | AN8660 |
| 1098 | CONTIG158 | 247053 | 248312 | 1.84 | 5.88E-02 | transcription_start_site | - | 243166 | 243166 | -4516 | 32629 | AN8660 |
| 1098 | CONTIG158 | 247053 | 248312 | 1.84 | 5.88E-02 | transcription_start_site | + | 247880 | 247880 | -197  | 32630 | AN8661 |
| 1098 | CONTIG158 | 247053 | 248312 | 1.84 | 5.88E-02 | transcription_start_site | + | 248092 | 248092 | -409  | 32631 | AN8661 |
| 1098 | CONTIG158 | 247053 | 248312 | 1.84 | 5.88E-02 | transcription_start_site | + | 248433 | 248433 | -750  | 32632 | AN8661 |
| 1098 | CONTIG158 | 247053 | 248312 | 1.84 | 5.88E-02 | transcription_start_site | + | 248734 | 248734 | -1051 | 32633 | AN8661 |
| 1098 | CONTIG158 | 247053 | 248312 | 1.84 | 5.88E-02 | transcription_start_site | + | 248930 | 248930 | -1247 | 32634 | AN8661 |
| 169  | CONTIG158 | 255978 | 257092 | 3.01 | 0.00E+00 | transcription_start_site | - | 252618 | 252618 | -3917 | 32635 | AN8662 |
| 169  | CONTIG158 | 255978 | 257092 | 3.01 | 0.00E+00 | transcription_start_site | - | 251980 | 251980 | -4555 | 32636 | AN8662 |
| 169  | CONTIG158 | 255978 | 257092 | 3.01 | 0.00E+00 | transcription_start_site | - | 251680 | 251680 | -4855 | 32637 | AN8662 |
| 891  | CONTIG158 | 257118 | 257762 | 2.01 | 3.70E-02 | transcription_start_site | - | 252618 | 252618 | -4822 | 32635 | AN8662 |
| 1018 | CONTIG158 | 254113 | 254392 | 1.9  | 5.22E-02 | transcription_start_site | - | 252618 | 252618 | -1634 | 32635 | AN8662 |
| 1018 | CONTIG158 | 254113 | 254392 | 1.9  | 5.22E-02 | transcription_start_site | - | 251980 | 251980 | -2272 | 32636 | AN8662 |
| 1018 | CONTIG158 | 254113 | 254392 | 1.9  | 5.22E-02 | transcription_start_site | - | 251680 | 251680 | -2572 | 32637 | AN8662 |
| 169  | CONTIG158 | 255978 | 257092 | 3.01 | 0.00E+00 | transcription_start_site | - | 256830 | 256830 | 295   | 32638 | AN8663 |
| 169  | CONTIG158 | 255978 | 257092 | 3.01 | 0.00E+00 | transcription_start_site | - | 255632 | 255632 | -903  | 32639 | AN8663 |
| 169  | CONTIG158 | 255978 | 257092 | 3.01 | 0.00E+00 | transcription_start_site | - | 254875 | 254875 | -1660 | 32640 | AN8663 |
| 169  | CONTIG158 | 255978 | 257092 | 3.01 | 0.00E+00 | transcription_start_site | - | 253453 | 253453 | -3082 | 32641 | AN8663 |

|      |           |        |        |      |          |                          |   |        |        |       |       |        |
|------|-----------|--------|--------|------|----------|--------------------------|---|--------|--------|-------|-------|--------|
| 891  | CONTIG158 | 257118 | 257762 | 2.01 | 3.70E-02 | transcription_start_site | - | 256830 | 256830 | -610  | 32638 | AN8663 |
| 891  | CONTIG158 | 257118 | 257762 | 2.01 | 3.70E-02 | transcription_start_site | - | 255632 | 255632 | -1808 | 32639 | AN8663 |
| 891  | CONTIG158 | 257118 | 257762 | 2.01 | 3.70E-02 | transcription_start_site | - | 254875 | 254875 | -2565 | 32640 | AN8663 |
| 891  | CONTIG158 | 257118 | 257762 | 2.01 | 3.70E-02 | transcription_start_site | - | 253453 | 253453 | -3987 | 32641 | AN8663 |
| 1018 | CONTIG158 | 254113 | 254392 | 1.9  | 5.22E-02 | transcription_start_site | - | 254875 | 254875 | 622   | 32640 | AN8663 |
| 1018 | CONTIG158 | 254113 | 254392 | 1.9  | 5.22E-02 | transcription_start_site | - | 253453 | 253453 | -799  | 32641 | AN8663 |
| 169  | CONTIG158 | 255978 | 257092 | 3.01 | 0.00E+00 | transcription_start_site | + | 257744 | 257744 | -1209 | 32642 | AN8664 |
| 169  | CONTIG158 | 255978 | 257092 | 3.01 | 0.00E+00 | transcription_start_site | + | 257822 | 257822 | -1287 | 32643 | AN8664 |
| 169  | CONTIG158 | 255978 | 257092 | 3.01 | 0.00E+00 | transcription_start_site | + | 257941 | 257941 | -1406 | 32644 | AN8664 |
| 169  | CONTIG158 | 255978 | 257092 | 3.01 | 0.00E+00 | transcription_start_site | + | 258058 | 258058 | -1523 | 32645 | AN8664 |
| 891  | CONTIG158 | 257118 | 257762 | 2.01 | 3.70E-02 | transcription_start_site | + | 257744 | 257744 | -304  | 32642 | AN8664 |
| 891  | CONTIG158 | 257118 | 257762 | 2.01 | 3.70E-02 | transcription_start_site | + | 257822 | 257822 | -382  | 32643 | AN8664 |
| 891  | CONTIG158 | 257118 | 257762 | 2.01 | 3.70E-02 | transcription_start_site | + | 257941 | 257941 | -501  | 32644 | AN8664 |
| 891  | CONTIG158 | 257118 | 257762 | 2.01 | 3.70E-02 | transcription_start_site | + | 258058 | 258058 | -618  | 32645 | AN8664 |
| 1018 | CONTIG158 | 254113 | 254392 | 1.9  | 5.22E-02 | transcription_start_site | + | 257744 | 257744 | -3491 | 32642 | AN8664 |
| 1018 | CONTIG158 | 254113 | 254392 | 1.9  | 5.22E-02 | transcription_start_site | + | 257822 | 257822 | -3569 | 32643 | AN8664 |
| 1018 | CONTIG158 | 254113 | 254392 | 1.9  | 5.22E-02 | transcription_start_site | + | 257941 | 257941 | -3688 | 32644 | AN8664 |
| 1018 | CONTIG158 | 254113 | 254392 | 1.9  | 5.22E-02 | transcription_start_site | + | 258058 | 258058 | -3805 | 32645 | AN8664 |
| 169  | CONTIG158 | 255978 | 257092 | 3.01 | 0.00E+00 | transcription_start_site | + | 261850 | 261850 | -5315 | 32646 | AN8665 |
| 738  | CONTIG158 | 263488 | 263982 | 2.17 | 2.12E-02 | transcription_start_site | + | 262959 | 262959 | 776   | 32648 | AN8665 |
| 891  | CONTIG158 | 257118 | 257762 | 2.01 | 3.70E-02 | transcription_start_site | + | 261850 | 261850 | -4410 | 32646 | AN8665 |
| 891  | CONTIG158 | 257118 | 257762 | 2.01 | 3.70E-02 | transcription_start_site | + | 262431 | 262431 | -4991 | 32647 | AN8665 |
| 738  | CONTIG158 | 263488 | 263982 | 2.17 | 2.12E-02 | transcription_start_site | + | 266595 | 266595 | -2860 | 32649 | AN8666 |
| 738  | CONTIG158 | 263488 | 263982 | 2.17 | 2.12E-02 | transcription_start_site | + | 266774 | 266774 | -3039 | 32650 | AN8666 |
| 1439 | CONTIG158 | 264383 | 265252 | 1.62 | 8.36E-02 | transcription_start_site | + | 266595 | 266595 | -1777 | 32649 | AN8666 |
| 1439 | CONTIG158 | 264383 | 265252 | 1.62 | 8.36E-02 | transcription_start_site | + | 266774 | 266774 | -1956 | 32650 | AN8666 |
| 193  | CONTIG158 | 274128 | 275162 | 2.95 | 0.00E+00 | transcription_start_site | + | 276466 | 276466 | -1821 | 32651 | AN8667 |
| 193  | CONTIG158 | 274128 | 275162 | 2.95 | 0.00E+00 | transcription_start_site | + | 276967 | 276967 | -2322 | 32652 | AN8667 |
| 350  | CONTIG158 | 273233 | 273967 | 2.68 | 0.00E+00 | transcription_start_site | + | 276466 | 276466 | -2866 | 32651 | AN8667 |
| 350  | CONTIG158 | 273233 | 273967 | 2.68 | 0.00E+00 | transcription_start_site | + | 276967 | 276967 | -3367 | 32652 | AN8667 |
| 193  | CONTIG158 | 274128 | 275162 | 2.95 | 0.00E+00 | transcription_start_site | + | 279929 | 279929 | -5284 | 32653 | AN8668 |
| 193  | CONTIG158 | 274128 | 275162 | 2.95 | 0.00E+00 | transcription_start_site | + | 280024 | 280024 | -5379 | 32654 | AN8668 |
| 1500 | CONTIG159 | 3921   | 4270   | 1.59 | 1.08E-01 | transcription_start_site | - | 4069   | 4069   | -26   | 32657 | AN8669 |
| 1500 | CONTIG159 | 3921   | 4270   | 1.59 | 1.08E-01 | transcription_start_site | - | 4153   | 4153   | 57    | 32656 | AN8669 |
| 1870 | CONTIG159 | 2421   | 3219   | 1.43 | 1.59E-01 | transcription_start_site | - | 4069   | 4069   | 1249  | 32657 | AN8669 |
| 1870 | CONTIG159 | 2421   | 3219   | 1.43 | 1.59E-01 | transcription_start_site | - | 4153   | 4153   | 1333  | 32656 | AN8669 |
| 641  | CONTIG159 | 24152  | 24431  | 2.25 | 1.57E-02 | transcription_start_site | - | 23159  | 23159  | -1132 | 32666 | AN8672 |
| 641  | CONTIG159 | 24152  | 24431  | 2.25 | 1.57E-02 | transcription_start_site | - | 22640  | 22640  | -1651 | 32667 | AN8672 |
| 641  | CONTIG159 | 24152  | 24431  | 2.25 | 1.57E-02 | transcription_start_site | - | 19641  | 19641  | -4650 | 32668 | AN8672 |
| 641  | CONTIG159 | 24152  | 24431  | 2.25 | 1.57E-02 | transcription_start_site | - | 19359  | 19359  | -4932 | 32669 | AN8672 |
| 641  | CONTIG159 | 24152  | 24431  | 2.25 | 1.57E-02 | transcription_start_site | + | 26580  | 26580  | -2288 | 32670 | AN8673 |
| 641  | CONTIG159 | 24152  | 24431  | 2.25 | 1.57E-02 | transcription_start_site | + | 27094  | 27094  | -2802 | 32671 | AN8673 |
| 641  | CONTIG159 | 24152  | 24431  | 2.25 | 1.57E-02 | transcription_start_site | + | 27256  | 27256  | -2964 | 32672 | AN8673 |
| 641  | CONTIG159 | 24152  | 24431  | 2.25 | 1.57E-02 | transcription_start_site | + | 27337  | 27337  | -3045 | 32673 | AN8673 |
| 641  | CONTIG159 | 24152  | 24431  | 2.25 | 1.57E-02 | transcription_start_site | + | 27424  | 27424  | -3132 | 32674 | AN8673 |
| 641  | CONTIG159 | 24152  | 24431  | 2.25 | 1.57E-02 | transcription_start_site | + | 27632  | 27632  | -3340 | 32675 | AN8673 |
| 641  | CONTIG159 | 24152  | 24431  | 2.25 | 1.57E-02 | transcription_start_site | + | 27876  | 27876  | -3584 | 32676 | AN8673 |
| 190  | CONTIG159 | 34896  | 35315  | 2.96 | 1.22E-03 | transcription_start_site | - | 30165  | 30165  | -4940 | 32677 | AN8674 |
| 190  | CONTIG159 | 34896  | 35315  | 2.96 | 1.22E-03 | transcription_start_site | - | 30059  | 30059  | -5046 | 32678 | AN8674 |
| 190  | CONTIG159 | 34896  | 35315  | 2.96 | 1.22E-03 | transcription_start_site | - | 34722  | 34722  | -383  | 32683 | AN8676 |
| 190  | CONTIG159 | 34896  | 35315  | 2.96 | 1.22E-03 | transcription_start_site | - | 34306  | 34306  | -799  | 32684 | AN8676 |
| 190  | CONTIG159 | 34896  | 35315  | 2.96 | 1.22E-03 | transcription_start_site | - | 34108  | 34108  | -997  | 32685 | AN8676 |
| 1064 | CONTIG159 | 38861  | 39125  | 1.86 | 5.22E-02 | transcription_start_site | - | 34722  | 34722  | -4271 | 32683 | AN8676 |
| 1064 | CONTIG159 | 38861  | 39125  | 1.86 | 5.22E-02 | transcription_start_site | - | 34306  | 34306  | -4687 | 32684 | AN8676 |
| 1064 | CONTIG159 | 38861  | 39125  | 1.86 | 5.22E-02 | transcription_start_site | - | 34108  | 34108  | -4885 | 32685 | AN8676 |
| 1064 | CONTIG159 | 38861  | 39125  | 1.86 | 5.22E-02 | transcription_start_site | - | 38511  | 38511  | -482  | 32686 | AN8677 |
| 1760 | CONTIG159 | 40052  | 40551  | 1.48 | 1.28E-01 | transcription_start_site | - | 38511  | 38511  | -1790 | 32686 | AN8677 |

|      |           |       |       |      |          |                          |   |       |       |       |       |        |
|------|-----------|-------|-------|------|----------|--------------------------|---|-------|-------|-------|-------|--------|
| 1760 | CONTIG159 | 40052 | 40551 | 1.48 | 1.28E-01 | transcription_start_site | - | 41341 | 41341 | 1039  | 32689 | AN8678 |
| 1760 | CONTIG159 | 40052 | 40551 | 1.48 | 1.28E-01 | transcription_start_site | - | 41388 | 41388 | 1086  | 32688 | AN8678 |
| 1539 | CONTIG160 | 13351 | 14311 | 1.57 | 1.25E-01 | transcription_start_site | - | 12500 | 12500 | -1331 | 32714 | AN8691 |
| 1539 | CONTIG160 | 13351 | 14311 | 1.57 | 1.25E-01 | transcription_start_site | - | 12074 | 12074 | -1757 | 32715 | AN8691 |
| 1539 | CONTIG160 | 13351 | 14311 | 1.57 | 1.25E-01 | transcription_start_site | - | 9649  | 9649  | -4182 | 32716 | AN8691 |
| 1539 | CONTIG160 | 13351 | 14311 | 1.57 | 1.25E-01 | transcription_start_site | - | 13685 | 13685 | -146  | 32717 | AN8692 |
| 1539 | CONTIG160 | 13351 | 14311 | 1.57 | 1.25E-01 | transcription_start_site | - | 13569 | 13569 | -262  | 32718 | AN8692 |
| 1539 | CONTIG160 | 13351 | 14311 | 1.57 | 1.25E-01 | transcription_start_site | - | 13236 | 13236 | -595  | 32719 | AN8692 |
| 4    | CONTIG160 | 26402 | 27501 | 3.92 | 0.00E+00 | transcription_start_site | - | 24673 | 24673 | -2278 | 32720 | AN8694 |
| 4    | CONTIG160 | 26402 | 27501 | 3.92 | 0.00E+00 | transcription_start_site | - | 24408 | 24408 | -2543 | 32721 | AN8694 |
| 4    | CONTIG160 | 26402 | 27501 | 3.92 | 0.00E+00 | transcription_start_site | - | 23985 | 23985 | -2966 | 32722 | AN8694 |
| 4    | CONTIG160 | 26402 | 27501 | 3.92 | 0.00E+00 | transcription_start_site | - | 23595 | 23595 | -3356 | 32723 | AN8694 |
| 4    | CONTIG160 | 26402 | 27501 | 3.92 | 0.00E+00 | transcription_start_site | - | 22676 | 22676 | -4275 | 32724 | AN8694 |
| 43   | CONTIG160 | 28726 | 29150 | 3.47 | 2.67E-04 | transcription_start_site | - | 24673 | 24673 | -4265 | 32720 | AN8694 |
| 43   | CONTIG160 | 28726 | 29150 | 3.47 | 2.67E-04 | transcription_start_site | - | 24408 | 24408 | -4530 | 32721 | AN8694 |
| 43   | CONTIG160 | 28726 | 29150 | 3.47 | 2.67E-04 | transcription_start_site | - | 23985 | 23985 | -4953 | 32722 | AN8694 |
| 243  | CONTIG160 | 29551 | 29845 | 2.86 | 2.22E-03 | transcription_start_site | - | 24673 | 24673 | -5025 | 32720 | AN8694 |
| 493  | CONTIG160 | 24242 | 24576 | 2.46 | 8.81E-03 | transcription_start_site | - | 24408 | 24408 | -1    | 32721 | AN8694 |
| 493  | CONTIG160 | 24242 | 24576 | 2.46 | 8.81E-03 | transcription_start_site | - | 24673 | 24673 | 264   | 32720 | AN8694 |
| 493  | CONTIG160 | 24242 | 24576 | 2.46 | 8.81E-03 | transcription_start_site | - | 23985 | 23985 | -424  | 32722 | AN8694 |
| 493  | CONTIG160 | 24242 | 24576 | 2.46 | 8.81E-03 | transcription_start_site | - | 23595 | 23595 | -814  | 32723 | AN8694 |
| 493  | CONTIG160 | 24242 | 24576 | 2.46 | 8.81E-03 | transcription_start_site | - | 22676 | 22676 | -1733 | 32724 | AN8694 |
| 1241 | CONTIG160 | 23412 | 24206 | 1.74 | 6.16E-02 | transcription_start_site | - | 23985 | 23985 | 176   | 32722 | AN8694 |
| 1241 | CONTIG160 | 23412 | 24206 | 1.74 | 6.16E-02 | transcription_start_site | - | 23595 | 23595 | -214  | 32723 | AN8694 |
| 1241 | CONTIG160 | 23412 | 24206 | 1.74 | 6.16E-02 | transcription_start_site | - | 24408 | 24408 | 599   | 32721 | AN8694 |
| 1241 | CONTIG160 | 23412 | 24206 | 1.74 | 6.16E-02 | transcription_start_site | - | 24673 | 24673 | 864   | 32720 | AN8694 |
| 1241 | CONTIG160 | 23412 | 24206 | 1.74 | 6.16E-02 | transcription_start_site | - | 22676 | 22676 | -1133 | 32724 | AN8694 |
| 528  | CONTIG160 | 34666 | 34940 | 2.41 | 1.11E-02 | transcription_start_site | - | 34851 | 34851 | 48    | 32731 | AN8695 |
| 528  | CONTIG160 | 34666 | 34940 | 2.41 | 1.11E-02 | transcription_start_site | - | 34385 | 34385 | -418  | 32732 | AN8695 |
| 528  | CONTIG160 | 34666 | 34940 | 2.41 | 1.11E-02 | transcription_start_site | - | 35712 | 35712 | 909   | 32730 | AN8695 |
| 1798 | CONTIG160 | 37142 | 37482 | 1.46 | 1.50E-01 | transcription_start_site | - | 37066 | 37066 | -246  | 32725 | AN8695 |
| 1798 | CONTIG160 | 37142 | 37482 | 1.46 | 1.50E-01 | transcription_start_site | - | 36413 | 36413 | -899  | 32726 | AN8695 |
| 1798 | CONTIG160 | 37142 | 37482 | 1.46 | 1.50E-01 | transcription_start_site | - | 36245 | 36245 | -1067 | 32727 | AN8695 |
| 1798 | CONTIG160 | 37142 | 37482 | 1.46 | 1.50E-01 | transcription_start_site | - | 36108 | 36108 | -1204 | 32728 | AN8695 |
| 1798 | CONTIG160 | 37142 | 37482 | 1.46 | 1.50E-01 | transcription_start_site | - | 36036 | 36036 | -1276 | 32729 | AN8695 |
| 1798 | CONTIG160 | 37142 | 37482 | 1.46 | 1.50E-01 | transcription_start_site | - | 35712 | 35712 | -1600 | 32730 | AN8695 |
| 1798 | CONTIG160 | 37142 | 37482 | 1.46 | 1.50E-01 | transcription_start_site | - | 34851 | 34851 | -2461 | 32731 | AN8695 |
| 1798 | CONTIG160 | 37142 | 37482 | 1.46 | 1.50E-01 | transcription_start_site | - | 34385 | 34385 | -2927 | 32732 | AN8695 |
| 528  | CONTIG160 | 34666 | 34940 | 2.41 | 1.11E-02 | transcription_start_site | + | 37716 | 37716 | -2913 | 32733 | AN8696 |
| 528  | CONTIG160 | 34666 | 34940 | 2.41 | 1.11E-02 | transcription_start_site | + | 38296 | 38296 | -3493 | 32734 | AN8696 |
| 1798 | CONTIG160 | 37142 | 37482 | 1.46 | 1.50E-01 | transcription_start_site | + | 37716 | 37716 | -404  | 32733 | AN8696 |
| 1798 | CONTIG160 | 37142 | 37482 | 1.46 | 1.50E-01 | transcription_start_site | + | 38296 | 38296 | -984  | 32734 | AN8696 |
| 1929 | CONTIG160 | 51617 | 51956 | 1.4  | 1.93E-01 | transcription_start_site | + | 56792 | 56792 | -5005 | 32747 | AN8702 |
| 1929 | CONTIG160 | 51617 | 51956 | 1.4  | 1.93E-01 | transcription_start_site | + | 56906 | 56906 | -5119 | 32748 | AN8702 |
| 1441 | CONTIG160 | 66237 | 66599 | 1.62 | 1.08E-01 | transcription_start_site | - | 63669 | 63669 | -2749 | 32762 | AN8706 |
| 1441 | CONTIG160 | 66237 | 66599 | 1.62 | 1.08E-01 | transcription_start_site | - | 63179 | 63179 | -3239 | 32763 | AN8706 |
| 1540 | CONTIG160 | 63769 | 64048 | 1.57 | 1.25E-01 | transcription_start_site | - | 63669 | 63669 | -239  | 32762 | AN8706 |
| 1540 | CONTIG160 | 63769 | 64048 | 1.57 | 1.25E-01 | transcription_start_site | - | 63179 | 63179 | -729  | 32763 | AN8706 |
| 1799 | CONTIG160 | 68477 | 69126 | 1.46 | 1.50E-01 | transcription_start_site | - | 63669 | 63669 | -5132 | 32762 | AN8706 |
| 1441 | CONTIG160 | 66237 | 66599 | 1.62 | 1.08E-01 | transcription_start_site | - | 66265 | 66265 | -153  | 32764 | AN8707 |
| 1441 | CONTIG160 | 66237 | 66599 | 1.62 | 1.08E-01 | transcription_start_site | - | 65963 | 65963 | -455  | 32765 | AN8707 |
| 1441 | CONTIG160 | 66237 | 66599 | 1.62 | 1.08E-01 | transcription_start_site | - | 65864 | 65864 | -554  | 32766 | AN8707 |
| 1441 | CONTIG160 | 66237 | 66599 | 1.62 | 1.08E-01 | transcription_start_site | - | 65764 | 65764 | -654  | 32767 | AN8707 |
| 1441 | CONTIG160 | 66237 | 66599 | 1.62 | 1.08E-01 | transcription_start_site | - | 65594 | 65594 | -824  | 32768 | AN8707 |
| 1441 | CONTIG160 | 66237 | 66599 | 1.62 | 1.08E-01 | transcription_start_site | - | 64526 | 64526 | -1892 | 32769 | AN8707 |
| 1540 | CONTIG160 | 63769 | 64048 | 1.57 | 1.25E-01 | transcription_start_site | - | 64526 | 64526 | 617   | 32769 | AN8707 |
| 1799 | CONTIG160 | 68477 | 69126 | 1.46 | 1.50E-01 | transcription_start_site | - | 66265 | 66265 | -2536 | 32764 | AN8707 |

|      |           |        |        |      |          |                          |   |        |        |       |       |        |
|------|-----------|--------|--------|------|----------|--------------------------|---|--------|--------|-------|-------|--------|
| 1799 | CONTIG160 | 68477  | 69126  | 1.46 | 1.50E-01 | transcription_start_site | - | 65963  | 65963  | -2838 | 32765 | AN8707 |
| 1799 | CONTIG160 | 68477  | 69126  | 1.46 | 1.50E-01 | transcription_start_site | - | 65864  | 65864  | -2937 | 32766 | AN8707 |
| 1799 | CONTIG160 | 68477  | 69126  | 1.46 | 1.50E-01 | transcription_start_site | - | 65764  | 65764  | -3037 | 32767 | AN8707 |
| 1799 | CONTIG160 | 68477  | 69126  | 1.46 | 1.50E-01 | transcription_start_site | - | 65594  | 65594  | -3207 | 32768 | AN8707 |
| 1799 | CONTIG160 | 68477  | 69126  | 1.46 | 1.50E-01 | transcription_start_site | - | 64526  | 64526  | -4275 | 32769 | AN8707 |
| 1441 | CONTIG160 | 66237  | 66599  | 1.62 | 1.08E-01 | transcription_start_site | + | 67305  | 67305  | -887  | 32770 | AN8708 |
| 1441 | CONTIG160 | 66237  | 66599  | 1.62 | 1.08E-01 | transcription_start_site | + | 67652  | 67652  | -1234 | 32771 | AN8708 |
| 1441 | CONTIG160 | 66237  | 66599  | 1.62 | 1.08E-01 | transcription_start_site | + | 67857  | 67857  | -1439 | 32772 | AN8708 |
| 1441 | CONTIG160 | 66237  | 66599  | 1.62 | 1.08E-01 | transcription_start_site | + | 68198  | 68198  | -1780 | 32773 | AN8708 |
| 1540 | CONTIG160 | 63769  | 64048  | 1.57 | 1.25E-01 | transcription_start_site | + | 67305  | 67305  | -3396 | 32770 | AN8708 |
| 1540 | CONTIG160 | 63769  | 64048  | 1.57 | 1.25E-01 | transcription_start_site | + | 67652  | 67652  | -3743 | 32771 | AN8708 |
| 1540 | CONTIG160 | 63769  | 64048  | 1.57 | 1.25E-01 | transcription_start_site | + | 67857  | 67857  | -3948 | 32772 | AN8708 |
| 1540 | CONTIG160 | 63769  | 64048  | 1.57 | 1.25E-01 | transcription_start_site | + | 68198  | 68198  | -4289 | 32773 | AN8708 |
| 1799 | CONTIG160 | 68477  | 69126  | 1.46 | 1.50E-01 | transcription_start_site | + | 68198  | 68198  | 603   | 32773 | AN8708 |
| 1799 | CONTIG160 | 68477  | 69126  | 1.46 | 1.50E-01 | transcription_start_site | + | 67857  | 67857  | 944   | 32772 | AN8708 |
| 1799 | CONTIG160 | 68477  | 69126  | 1.46 | 1.50E-01 | transcription_start_site | + | 67652  | 67652  | 1149  | 32771 | AN8708 |
| 1441 | CONTIG160 | 66237  | 66599  | 1.62 | 1.08E-01 | transcription_start_site | + | 68795  | 68795  | -2377 | 32774 | AN8709 |
| 1441 | CONTIG160 | 66237  | 66599  | 1.62 | 1.08E-01 | transcription_start_site | + | 69937  | 69937  | -3519 | 32775 | AN8709 |
| 1441 | CONTIG160 | 66237  | 66599  | 1.62 | 1.08E-01 | transcription_start_site | + | 70141  | 70141  | -3723 | 32776 | AN8709 |
| 1540 | CONTIG160 | 63769  | 64048  | 1.57 | 1.25E-01 | transcription_start_site | + | 68795  | 68795  | -4886 | 32774 | AN8709 |
| 1799 | CONTIG160 | 68477  | 69126  | 1.46 | 1.50E-01 | transcription_start_site | + | 68795  | 68795  | 6     | 32774 | AN8709 |
| 1799 | CONTIG160 | 68477  | 69126  | 1.46 | 1.50E-01 | transcription_start_site | + | 69937  | 69937  | -1135 | 32775 | AN8709 |
| 1799 | CONTIG160 | 68477  | 69126  | 1.46 | 1.50E-01 | transcription_start_site | + | 70141  | 70141  | -1339 | 32776 | AN8709 |
| 1799 | CONTIG160 | 68477  | 69126  | 1.46 | 1.50E-01 | transcription_start_site | + | 73652  | 73652  | -4850 | 32780 | AN8712 |
| 1799 | CONTIG160 | 68477  | 69126  | 1.46 | 1.50E-01 | transcription_start_site | + | 73891  | 73891  | -5089 | 32781 | AN8712 |
| 1085 | CONTIG160 | 80267  | 80601  | 1.85 | 5.88E-02 | transcription_start_site | - | 78130  | 78130  | -2304 | 32782 | AN8713 |
| 1085 | CONTIG160 | 80267  | 80601  | 1.85 | 5.88E-02 | transcription_start_site | - | 78020  | 78020  | -2414 | 32783 | AN8713 |
| 1085 | CONTIG160 | 80267  | 80601  | 1.85 | 5.88E-02 | transcription_start_site | - | 77788  | 77788  | -2646 | 32784 | AN8713 |
| 1085 | CONTIG160 | 80267  | 80601  | 1.85 | 5.88E-02 | transcription_start_site | - | 77667  | 77667  | -2767 | 32785 | AN8713 |
| 1085 | CONTIG160 | 80267  | 80601  | 1.85 | 5.88E-02 | transcription_start_site | - | 77533  | 77533  | -2901 | 32786 | AN8713 |
| 1085 | CONTIG160 | 80267  | 80601  | 1.85 | 5.88E-02 | transcription_start_site | - | 77435  | 77435  | -2999 | 32787 | AN8713 |
| 1085 | CONTIG160 | 80267  | 80601  | 1.85 | 5.88E-02 | transcription_start_site | - | 76907  | 76907  | -3527 | 32788 | AN8713 |
| 1085 | CONTIG160 | 80267  | 80601  | 1.85 | 5.88E-02 | transcription_start_site | - | 75758  | 75758  | -4676 | 32789 | AN8713 |
| 1085 | CONTIG160 | 80267  | 80601  | 1.85 | 5.88E-02 | transcription_start_site | - | 78755  | 78755  | -1679 | 32790 | AN8714 |
| 1085 | CONTIG160 | 80267  | 80601  | 1.85 | 5.88E-02 | transcription_start_site | - | 78577  | 78577  | -1857 | 32791 | AN8714 |
| 122  | CONTIG160 | 91952  | 92249  | 3.14 | 9.51E-04 | transcription_start_site | + | 94396  | 94396  | -2295 | 32794 | AN8718 |
| 122  | CONTIG160 | 91952  | 92249  | 3.14 | 9.51E-04 | transcription_start_site | + | 94576  | 94576  | -2475 | 32795 | AN8718 |
| 122  | CONTIG160 | 91952  | 92249  | 3.14 | 9.51E-04 | transcription_start_site | + | 94751  | 94751  | -2650 | 32796 | AN8718 |
| 122  | CONTIG160 | 91952  | 92249  | 3.14 | 9.51E-04 | transcription_start_site | + | 94853  | 94853  | -2752 | 32797 | AN8718 |
| 122  | CONTIG160 | 91952  | 92249  | 3.14 | 9.51E-04 | transcription_start_site | + | 95329  | 95329  | -3228 | 32798 | AN8718 |
| 122  | CONTIG160 | 91952  | 92249  | 3.14 | 9.51E-04 | transcription_start_site | + | 96901  | 96901  | -4800 | 32799 | AN8718 |
| 214  | CONTIG160 | 125112 | 125381 | 2.91 | 1.80E-03 | transcription_start_site | - | 123166 | 123166 | -2080 | 32831 | AN8730 |
| 214  | CONTIG160 | 125112 | 125381 | 2.91 | 1.80E-03 | transcription_start_site | - | 121941 | 121941 | -3305 | 32832 | AN8730 |
| 1682 | CONTIG160 | 135382 | 135661 | 1.51 | 1.44E-01 | transcription_start_site | - | 132143 | 132143 | -3378 | 32836 | AN8733 |
| 1682 | CONTIG160 | 135382 | 135661 | 1.51 | 1.44E-01 | transcription_start_site | - | 131622 | 131622 | -3899 | 32837 | AN8733 |
| 1682 | CONTIG160 | 135382 | 135661 | 1.51 | 1.44E-01 | transcription_start_site | - | 131001 | 131001 | -4520 | 32838 | AN8733 |
| 1682 | CONTIG160 | 135382 | 135661 | 1.51 | 1.44E-01 | transcription_start_site | + | 135469 | 135469 | 52    | 32845 | AN8735 |
| 1682 | CONTIG160 | 135382 | 135661 | 1.51 | 1.44E-01 | transcription_start_site | + | 134572 | 134572 | 949   | 32844 | AN8735 |
| 155  | CONTIG161 | 5421   | 5685   | 3.04 | 1.54E-03 | transcription_start_site | + | 4831   | 4831   | 722   | 32857 | AN8739 |
| 14   | CONTIG161 | 13064  | 13478  | 3.67 | 0.00E+00 | transcription_start_site | - | 13558  | 13558  | 287   | 32859 | AN8740 |
| 14   | CONTIG161 | 13064  | 13478  | 3.67 | 0.00E+00 | transcription_start_site | - | 13708  | 13708  | 437   | 32858 | AN8740 |
| 153  | CONTIG161 | 13969  | 14468  | 3.04 | 0.00E+00 | transcription_start_site | - | 13708  | 13708  | -510  | 32858 | AN8740 |
| 153  | CONTIG161 | 13969  | 14468  | 3.04 | 0.00E+00 | transcription_start_site | - | 13558  | 13558  | -660  | 32859 | AN8740 |
| 1181 | CONTIG161 | 15154  | 15653  | 1.78 | 8.01E-02 | transcription_start_site | - | 13708  | 13708  | -1695 | 32858 | AN8740 |
| 1181 | CONTIG161 | 15154  | 15653  | 1.78 | 8.01E-02 | transcription_start_site | - | 13558  | 13558  | -1845 | 32859 | AN8740 |
| 14   | CONTIG161 | 13064  | 13478  | 3.67 | 0.00E+00 | transcription_start_site | + | 14830  | 14830  | -1559 | 32860 | AN8741 |
| 14   | CONTIG161 | 13064  | 13478  | 3.67 | 0.00E+00 | transcription_start_site | + | 15116  | 15116  | -1845 | 32861 | AN8741 |

|      |           |       |       |      |          |                          |   |       |       |       |       |        |
|------|-----------|-------|-------|------|----------|--------------------------|---|-------|-------|-------|-------|--------|
| 48   | CONTIG161 | 10668 | 11152 | 3.44 | 0.00E+00 | transcription_start_site | + | 14830 | 14830 | -3920 | 32860 | AN8741 |
| 48   | CONTIG161 | 10668 | 11152 | 3.44 | 0.00E+00 | transcription_start_site | + | 15116 | 15116 | -4206 | 32861 | AN8741 |
| 153  | CONTIG161 | 13969 | 14468 | 3.04 | 0.00E+00 | transcription_start_site | + | 14830 | 14830 | -611  | 32860 | AN8741 |
| 153  | CONTIG161 | 13969 | 14468 | 3.04 | 0.00E+00 | transcription_start_site | + | 15116 | 15116 | -897  | 32861 | AN8741 |
| 1181 | CONTIG161 | 15154 | 15653 | 1.78 | 8.01E-02 | transcription_start_site | + | 15116 | 15116 | 287   | 32861 | AN8741 |
| 1181 | CONTIG161 | 15154 | 15653 | 1.78 | 8.01E-02 | transcription_start_site | + | 14830 | 14830 | 573   | 32860 | AN8741 |
| 103  | CONTIG161 | 44796 | 46052 | 3.22 | 9.51E-04 | transcription_start_site | - | 40161 | 40161 | -5263 | 32875 | AN8748 |
| 103  | CONTIG161 | 44796 | 46052 | 3.22 | 9.51E-04 | transcription_start_site | - | 40028 | 40028 | -5396 | 32876 | AN8748 |
| 103  | CONTIG161 | 44796 | 46052 | 3.22 | 9.51E-04 | transcription_start_site | - | 39949 | 39949 | -5475 | 32877 | AN8748 |
| 30   | CONTIG161 | 46596 | 46930 | 3.56 | 2.67E-04 | transcription_start_site | - | 41767 | 41767 | -4996 | 32881 | AN8749 |
| 30   | CONTIG161 | 46596 | 46930 | 3.56 | 2.67E-04 | transcription_start_site | - | 41646 | 41646 | -5117 | 32882 | AN8749 |
| 103  | CONTIG161 | 44796 | 46052 | 3.22 | 9.51E-04 | transcription_start_site | - | 41767 | 41767 | -3657 | 32881 | AN8749 |
| 103  | CONTIG161 | 44796 | 46052 | 3.22 | 9.51E-04 | transcription_start_site | - | 41646 | 41646 | -3778 | 32882 | AN8749 |
| 103  | CONTIG161 | 44796 | 46052 | 3.22 | 9.51E-04 | transcription_start_site | - | 41049 | 41049 | -4375 | 32883 | AN8749 |
| 30   | CONTIG161 | 46596 | 46930 | 3.56 | 2.67E-04 | transcription_start_site | - | 45759 | 45759 | -1004 | 32886 | AN8751 |
| 30   | CONTIG161 | 46596 | 46930 | 3.56 | 2.67E-04 | transcription_start_site | - | 45144 | 45144 | -1619 | 32887 | AN8751 |
| 30   | CONTIG161 | 46596 | 46930 | 3.56 | 2.67E-04 | transcription_start_site | - | 43780 | 43780 | -2983 | 32888 | AN8751 |
| 103  | CONTIG161 | 44796 | 46052 | 3.22 | 9.51E-04 | transcription_start_site | - | 45144 | 45144 | -280  | 32887 | AN8751 |
| 103  | CONTIG161 | 44796 | 46052 | 3.22 | 9.51E-04 | transcription_start_site | - | 45759 | 45759 | 335   | 32886 | AN8751 |
| 103  | CONTIG161 | 44796 | 46052 | 3.22 | 9.51E-04 | transcription_start_site | - | 43780 | 43780 | -1644 | 32888 | AN8751 |
| 30   | CONTIG161 | 46596 | 46930 | 3.56 | 2.67E-04 | transcription_start_site | - | 46956 | 46956 | 193   | 32891 | AN8752 |
| 30   | CONTIG161 | 46596 | 46930 | 3.56 | 2.67E-04 | transcription_start_site | - | 47249 | 47249 | 486   | 32890 | AN8752 |
| 30   | CONTIG161 | 46596 | 46930 | 3.56 | 2.67E-04 | transcription_start_site | - | 47396 | 47396 | 633   | 32889 | AN8752 |
| 103  | CONTIG161 | 44796 | 46052 | 3.22 | 9.51E-04 | transcription_start_site | - | 46956 | 46956 | 1532  | 32891 | AN8752 |
| 1030 | CONTIG161 | 60161 | 60510 | 1.89 | 5.88E-02 | transcription_start_site | - | 56622 | 56622 | -3713 | 32897 | AN8754 |
| 1030 | CONTIG161 | 60161 | 60510 | 1.89 | 5.88E-02 | transcription_start_site | - | 56419 | 56419 | -3916 | 32898 | AN8754 |
| 1030 | CONTIG161 | 60161 | 60510 | 1.89 | 5.88E-02 | transcription_start_site | - | 55910 | 55910 | -4425 | 32899 | AN8754 |
| 1030 | CONTIG161 | 60161 | 60510 | 1.89 | 5.88E-02 | transcription_start_site | - | 55777 | 55777 | -4558 | 32900 | AN8754 |
| 1030 | CONTIG161 | 60161 | 60510 | 1.89 | 5.88E-02 | transcription_start_site | - | 55427 | 55427 | -4908 | 32901 | AN8754 |
| 1030 | CONTIG161 | 60161 | 60510 | 1.89 | 5.88E-02 | transcription_start_site | - | 55206 | 55206 | -5129 | 32902 | AN8754 |
| 1030 | CONTIG161 | 60161 | 60510 | 1.89 | 5.88E-02 | transcription_start_site | + | 60367 | 60367 | -31   | 32903 | AN8755 |
| 1030 | CONTIG161 | 60161 | 60510 | 1.89 | 5.88E-02 | transcription_start_site | + | 60846 | 60846 | -510  | 32904 | AN8755 |
| 1030 | CONTIG161 | 60161 | 60510 | 1.89 | 5.88E-02 | transcription_start_site | + | 61182 | 61182 | -846  | 32905 | AN8755 |
| 1030 | CONTIG161 | 60161 | 60510 | 1.89 | 5.88E-02 | transcription_start_site | + | 61643 | 61643 | -1307 | 32906 | AN8755 |
| 1030 | CONTIG161 | 60161 | 60510 | 1.89 | 5.88E-02 | transcription_start_site | + | 62116 | 62116 | -1780 | 32907 | AN8755 |
| 1030 | CONTIG161 | 60161 | 60510 | 1.89 | 5.88E-02 | transcription_start_site | + | 62448 | 62448 | -2112 | 32908 | AN8755 |
| 306  | CONTIG161 | 69904 | 70263 | 2.76 | 4.61E-03 | transcription_start_site | - | 64987 | 64987 | -5096 | 32909 | AN8756 |
| 1474 | CONTIG161 | 66156 | 66594 | 1.61 | 1.25E-01 | transcription_start_site | - | 64987 | 64987 | -1388 | 32909 | AN8756 |
| 1474 | CONTIG161 | 66156 | 66594 | 1.61 | 1.25E-01 | transcription_start_site | - | 63763 | 63763 | -2612 | 32910 | AN8756 |
| 1474 | CONTIG161 | 66156 | 66594 | 1.61 | 1.25E-01 | transcription_start_site | - | 63202 | 63202 | -3173 | 32911 | AN8756 |
| 1584 | CONTIG161 | 64746 | 65016 | 1.55 | 1.44E-01 | transcription_start_site | - | 64987 | 64987 | 106   | 32909 | AN8756 |
| 1584 | CONTIG161 | 64746 | 65016 | 1.55 | 1.44E-01 | transcription_start_site | - | 63763 | 63763 | -1118 | 32910 | AN8756 |
| 1584 | CONTIG161 | 64746 | 65016 | 1.55 | 1.44E-01 | transcription_start_site | - | 63202 | 63202 | -1679 | 32911 | AN8756 |
| 306  | CONTIG161 | 69904 | 70263 | 2.76 | 4.61E-03 | transcription_start_site | + | 69348 | 69348 | 735   | 32917 | AN8757 |
| 1474 | CONTIG161 | 66156 | 66594 | 1.61 | 1.25E-01 | transcription_start_site | + | 67372 | 67372 | -997  | 32912 | AN8757 |
| 1474 | CONTIG161 | 66156 | 66594 | 1.61 | 1.25E-01 | transcription_start_site | + | 67808 | 67808 | -1433 | 32913 | AN8757 |
| 1474 | CONTIG161 | 66156 | 66594 | 1.61 | 1.25E-01 | transcription_start_site | + | 68054 | 68054 | -1679 | 32914 | AN8757 |
| 1474 | CONTIG161 | 66156 | 66594 | 1.61 | 1.25E-01 | transcription_start_site | + | 68268 | 68268 | -1893 | 32915 | AN8757 |
| 1474 | CONTIG161 | 66156 | 66594 | 1.61 | 1.25E-01 | transcription_start_site | + | 68648 | 68648 | -2273 | 32916 | AN8757 |
| 1474 | CONTIG161 | 66156 | 66594 | 1.61 | 1.25E-01 | transcription_start_site | + | 69348 | 69348 | -2973 | 32917 | AN8757 |
| 1584 | CONTIG161 | 64746 | 65016 | 1.55 | 1.44E-01 | transcription_start_site | + | 67372 | 67372 | -2491 | 32912 | AN8757 |
| 1584 | CONTIG161 | 64746 | 65016 | 1.55 | 1.44E-01 | transcription_start_site | + | 67808 | 67808 | -2927 | 32913 | AN8757 |
| 1584 | CONTIG161 | 64746 | 65016 | 1.55 | 1.44E-01 | transcription_start_site | + | 68054 | 68054 | -3173 | 32914 | AN8757 |
| 1584 | CONTIG161 | 64746 | 65016 | 1.55 | 1.44E-01 | transcription_start_site | + | 68268 | 68268 | -3387 | 32915 | AN8757 |
| 1584 | CONTIG161 | 64746 | 65016 | 1.55 | 1.44E-01 | transcription_start_site | + | 68648 | 68648 | -3767 | 32916 | AN8757 |
| 1584 | CONTIG161 | 64746 | 65016 | 1.55 | 1.44E-01 | transcription_start_site | + | 69348 | 69348 | -4467 | 32917 | AN8757 |
| 781  | CONTIG161 | 74194 | 74603 | 2.12 | 1.81E-02 | transcription_start_site | - | 74019 | 74019 | -379  | 32918 | AN8759 |



|      |           |        |        |      |          |                          |   |        |        |       |       |        |
|------|-----------|--------|--------|------|----------|--------------------------|---|--------|--------|-------|-------|--------|
| 781  | CONTIG161 | 74194  | 74603  | 2.12 | 1.81E-02 | transcription_start_site | - | 73902  | 73902  | -496  | 32919 | AN8759 |
| 781  | CONTIG161 | 74194  | 74603  | 2.12 | 1.81E-02 | transcription_start_site | - | 73444  | 73444  | -954  | 32920 | AN8759 |
| 781  | CONTIG161 | 74194  | 74603  | 2.12 | 1.81E-02 | transcription_start_site | - | 73172  | 73172  | -1226 | 32921 | AN8759 |
| 306  | CONTIG161 | 69904  | 70263  | 2.76 | 4.61E-03 | transcription_start_site | + | 75002  | 75002  | -4918 | 32922 | AN8760 |
| 781  | CONTIG161 | 74194  | 74603  | 2.12 | 1.81E-02 | transcription_start_site | + | 75002  | 75002  | -603  | 32922 | AN8760 |
| 781  | CONTIG161 | 74194  | 74603  | 2.12 | 1.81E-02 | transcription_start_site | + | 75313  | 75313  | -914  | 32923 | AN8760 |
| 781  | CONTIG161 | 74194  | 74603  | 2.12 | 1.81E-02 | transcription_start_site | + | 75761  | 75761  | -1362 | 32924 | AN8760 |
| 781  | CONTIG161 | 74194  | 74603  | 2.12 | 1.81E-02 | transcription_start_site | + | 75973  | 75973  | -1574 | 32925 | AN8760 |
| 781  | CONTIG161 | 74194  | 74603  | 2.12 | 1.81E-02 | transcription_start_site | + | 76465  | 76465  | -2066 | 32926 | AN8760 |
| 1262 | CONTIG161 | 87608  | 87882  | 1.72 | 9.24E-02 | transcription_start_site | - | 85824  | 85824  | -1921 | 32943 | AN8765 |
| 1262 | CONTIG161 | 87608  | 87882  | 1.72 | 9.24E-02 | transcription_start_site | - | 85456  | 85456  | -2289 | 32944 | AN8765 |
| 1262 | CONTIG161 | 87608  | 87882  | 1.72 | 9.24E-02 | transcription_start_site | - | 83431  | 83431  | -4314 | 32945 | AN8765 |
| 1262 | CONTIG161 | 87608  | 87882  | 1.72 | 9.24E-02 | transcription_start_site | + | 87978  | 87978  | -233  | 32946 | AN8766 |
| 1262 | CONTIG161 | 87608  | 87882  | 1.72 | 9.24E-02 | transcription_start_site | + | 88074  | 88074  | -329  | 32947 | AN8766 |
| 1262 | CONTIG161 | 87608  | 87882  | 1.72 | 9.24E-02 | transcription_start_site | + | 88319  | 88319  | -574  | 32948 | AN8766 |
| 1262 | CONTIG161 | 87608  | 87882  | 1.72 | 9.24E-02 | transcription_start_site | + | 92433  | 92433  | -4688 | 32950 | AN8768 |
| 1262 | CONTIG161 | 87608  | 87882  | 1.72 | 9.24E-02 | transcription_start_site | + | 92788  | 92788  | -5043 | 32951 | AN8768 |
| 1846 | CONTIG161 | 97358  | 97777  | 1.44 | 1.93E-01 | transcription_start_site | + | 97413  | 97413  | 154   | 32958 | AN8770 |
| 1846 | CONTIG161 | 97358  | 97777  | 1.44 | 1.93E-01 | transcription_start_site | + | 100132 | 100132 | -2564 | 32959 | AN8770 |
| 88   | CONTIG161 | 121596 | 122010 | 3.27 | 8.69E-04 | transcription_start_site | + | 122220 | 122220 | -417  | 32967 | AN8774 |
| 88   | CONTIG161 | 121596 | 122010 | 3.27 | 8.69E-04 | transcription_start_site | + | 122305 | 122305 | -502  | 32968 | AN8774 |
| 88   | CONTIG161 | 121596 | 122010 | 3.27 | 8.69E-04 | transcription_start_site | + | 124930 | 124930 | -3127 | 32969 | AN8775 |
| 88   | CONTIG161 | 121596 | 122010 | 3.27 | 8.69E-04 | transcription_start_site | + | 125392 | 125392 | -3589 | 32970 | AN8775 |
| 88   | CONTIG161 | 121596 | 122010 | 3.27 | 8.69E-04 | transcription_start_site | + | 126000 | 126000 | -4197 | 32971 | AN8775 |
| 88   | CONTIG161 | 121596 | 122010 | 3.27 | 8.69E-04 | transcription_start_site | + | 126347 | 126347 | -4544 | 32972 | AN8775 |
| 1847 | CONTIG161 | 144308 | 144657 | 1.44 | 1.93E-01 | transcription_start_site | - | 139968 | 139968 | -4514 | 32979 | AN8778 |
| 1847 | CONTIG161 | 144308 | 144657 | 1.44 | 1.93E-01 | transcription_start_site | - | 139740 | 139740 | -4742 | 32980 | AN8778 |
| 1847 | CONTIG161 | 144308 | 144657 | 1.44 | 1.93E-01 | transcription_start_site | - | 139313 | 139313 | -5169 | 32981 | AN8778 |
| 1847 | CONTIG161 | 144308 | 144657 | 1.44 | 1.93E-01 | transcription_start_site | + | 146630 | 146630 | -2147 | 32996 | AN8780 |
| 1847 | CONTIG161 | 144308 | 144657 | 1.44 | 1.93E-01 | transcription_start_site | + | 146814 | 146814 | -2331 | 32997 | AN8780 |
| 724  | CONTIG161 | 147904 | 148193 | 2.18 | 2.62E-02 | transcription_start_site | + | 150021 | 150021 | -1972 | 32998 | AN8781 |
| 782  | CONTIG161 | 164789 | 165221 | 2.12 | 1.81E-02 | transcription_start_site | - | 160292 | 160292 | -4713 | 33002 | AN8783 |
| 1263 | CONTIG161 | 162384 | 162818 | 1.72 | 9.24E-02 | transcription_start_site | - | 160292 | 160292 | -2309 | 33002 | AN8783 |
| 1263 | CONTIG161 | 162384 | 162818 | 1.72 | 9.24E-02 | transcription_start_site | - | 158236 | 158236 | -4365 | 33003 | AN8783 |
| 782  | CONTIG161 | 164789 | 165221 | 2.12 | 1.81E-02 | transcription_start_site | - | 164368 | 164368 | -637  | 33007 | AN8785 |
| 782  | CONTIG161 | 164789 | 165221 | 2.12 | 1.81E-02 | transcription_start_site | - | 164119 | 164119 | -886  | 33008 | AN8785 |
| 782  | CONTIG161 | 164789 | 165221 | 2.12 | 1.81E-02 | transcription_start_site | - | 162862 | 162862 | -2143 | 33009 | AN8785 |
| 1263 | CONTIG161 | 162384 | 162818 | 1.72 | 9.24E-02 | transcription_start_site | - | 162862 | 162862 | 261   | 33009 | AN8785 |
| 1585 | CONTIG161 | 167339 | 167603 | 1.55 | 1.44E-01 | transcription_start_site | - | 164368 | 164368 | -3103 | 33007 | AN8785 |
| 1585 | CONTIG161 | 167339 | 167603 | 1.55 | 1.44E-01 | transcription_start_site | - | 164119 | 164119 | -3352 | 33008 | AN8785 |
| 1585 | CONTIG161 | 167339 | 167603 | 1.55 | 1.44E-01 | transcription_start_site | - | 162862 | 162862 | -4609 | 33009 | AN8785 |
| 782  | CONTIG161 | 164789 | 165221 | 2.12 | 1.81E-02 | transcription_start_site | - | 165134 | 165134 | 129   | 33013 | AN8786 |
| 782  | CONTIG161 | 164789 | 165221 | 2.12 | 1.81E-02 | transcription_start_site | - | 165381 | 165381 | 376   | 33012 | AN8786 |
| 782  | CONTIG161 | 164789 | 165221 | 2.12 | 1.81E-02 | transcription_start_site | - | 165514 | 165514 | 509   | 33011 | AN8786 |
| 1585 | CONTIG161 | 167339 | 167603 | 1.55 | 1.44E-01 | transcription_start_site | - | 166435 | 166435 | -1036 | 33010 | AN8786 |
| 1585 | CONTIG161 | 167339 | 167603 | 1.55 | 1.44E-01 | transcription_start_site | - | 165514 | 165514 | -1957 | 33011 | AN8786 |
| 1585 | CONTIG161 | 167339 | 167603 | 1.55 | 1.44E-01 | transcription_start_site | - | 165381 | 165381 | -2090 | 33012 | AN8786 |
| 1585 | CONTIG161 | 167339 | 167603 | 1.55 | 1.44E-01 | transcription_start_site | - | 165134 | 165134 | -2337 | 33013 | AN8786 |
| 1476 | CONTIG161 | 176110 | 176689 | 1.61 | 1.25E-01 | transcription_start_site | - | 171434 | 171434 | -4965 | 33014 | AN8787 |
| 1476 | CONTIG161 | 176110 | 176689 | 1.61 | 1.25E-01 | transcription_start_site | - | 171220 | 171220 | -5179 | 33015 | AN8787 |
| 1585 | CONTIG161 | 167339 | 167603 | 1.55 | 1.44E-01 | transcription_start_site | - | 168041 | 168041 | 570   | 33017 | AN8787 |
| 1585 | CONTIG161 | 167339 | 167603 | 1.55 | 1.44E-01 | transcription_start_site | - | 168560 | 168560 | 1089  | 33016 | AN8787 |
| 1585 | CONTIG161 | 167339 | 167603 | 1.55 | 1.44E-01 | transcription_start_site | + | 172055 | 172055 | -4584 | 33018 | AN8788 |
| 1099 | CONTIG161 | 176860 | 177129 | 1.84 | 6.84E-02 | transcription_start_site | - | 175367 | 175367 | -1627 | 33021 | AN8789 |
| 1099 | CONTIG161 | 176860 | 177129 | 1.84 | 6.84E-02 | transcription_start_site | - | 175217 | 175217 | -1777 | 33022 | AN8789 |
| 1476 | CONTIG161 | 176110 | 176689 | 1.61 | 1.25E-01 | transcription_start_site | - | 175367 | 175367 | -1032 | 33021 | AN8789 |
| 1476 | CONTIG161 | 176110 | 176689 | 1.61 | 1.25E-01 | transcription_start_site | - | 175217 | 175217 | -1182 | 33022 | AN8789 |

|      |           |        |        |      |          |                          |   |        |        |       |       |        |
|------|-----------|--------|--------|------|----------|--------------------------|---|--------|--------|-------|-------|--------|
| 1848 | CONTIG161 | 177830 | 178114 | 1.44 | 1.93E-01 | transcription_start_site | - | 175367 | 175367 | -2605 | 33021 | AN8789 |
| 1848 | CONTIG161 | 177830 | 178114 | 1.44 | 1.93E-01 | transcription_start_site | - | 175217 | 175217 | -2755 | 33022 | AN8789 |
| 1099 | CONTIG161 | 176860 | 177129 | 1.84 | 6.84E-02 | transcription_start_site | - | 176942 | 176942 | -52   | 33024 | AN8790 |
| 1099 | CONTIG161 | 176860 | 177129 | 1.84 | 6.84E-02 | transcription_start_site | - | 177524 | 177524 | 529   | 33023 | AN8790 |
| 1476 | CONTIG161 | 176110 | 176689 | 1.61 | 1.25E-01 | transcription_start_site | - | 176942 | 176942 | 542   | 33024 | AN8790 |
| 1476 | CONTIG161 | 176110 | 176689 | 1.61 | 1.25E-01 | transcription_start_site | - | 177524 | 177524 | 1124  | 33023 | AN8790 |
| 1848 | CONTIG161 | 177830 | 178114 | 1.44 | 1.93E-01 | transcription_start_site | - | 177524 | 177524 | -448  | 33023 | AN8790 |
| 1848 | CONTIG161 | 177830 | 178114 | 1.44 | 1.93E-01 | transcription_start_site | - | 176942 | 176942 | -1030 | 33024 | AN8790 |
| 654  | CONTIG161 | 196958 | 197312 | 2.24 | 1.06E-02 | transcription_start_site | - | 193230 | 193230 | -3905 | 33041 | AN8796 |
| 654  | CONTIG161 | 196958 | 197312 | 2.24 | 1.06E-02 | transcription_start_site | - | 192965 | 192965 | -4170 | 33042 | AN8796 |
| 654  | CONTIG161 | 196958 | 197312 | 2.24 | 1.06E-02 | transcription_start_site | - | 195653 | 195653 | -1482 | 33043 | AN8797 |
| 654  | CONTIG161 | 196958 | 197312 | 2.24 | 1.06E-02 | transcription_start_site | - | 195222 | 195222 | -1913 | 33044 | AN8797 |
| 654  | CONTIG161 | 196958 | 197312 | 2.24 | 1.06E-02 | transcription_start_site | - | 194608 | 194608 | -2527 | 33045 | AN8797 |
| 654  | CONTIG161 | 196958 | 197312 | 2.24 | 1.06E-02 | transcription_start_site | - | 194039 | 194039 | -3096 | 33046 | AN8797 |
| 654  | CONTIG161 | 196958 | 197312 | 2.24 | 1.06E-02 | transcription_start_site | + | 198449 | 198449 | -1314 | 33047 | AN8798 |
| 654  | CONTIG161 | 196958 | 197312 | 2.24 | 1.06E-02 | transcription_start_site | + | 201057 | 201057 | -3922 | 33048 | AN8798 |
| 132  | CONTIG161 | 251932 | 252300 | 3.1  | 0.00E+00 | transcription_start_site | + | 252691 | 252691 | -575  | 33103 | AN8815 |
| 132  | CONTIG161 | 251932 | 252300 | 3.1  | 0.00E+00 | transcription_start_site | + | 252860 | 252860 | -744  | 33104 | AN8815 |
| 132  | CONTIG161 | 251932 | 252300 | 3.1  | 0.00E+00 | transcription_start_site | + | 253197 | 253197 | -1081 | 33105 | AN8815 |
| 132  | CONTIG161 | 251932 | 252300 | 3.1  | 0.00E+00 | transcription_start_site | + | 253579 | 253579 | -1463 | 33106 | AN8815 |
| 132  | CONTIG161 | 251932 | 252300 | 3.1  | 0.00E+00 | transcription_start_site | + | 254277 | 254277 | -2161 | 33107 | AN8816 |
| 132  | CONTIG161 | 251932 | 252300 | 3.1  | 0.00E+00 | transcription_start_site | + | 254677 | 254677 | -2561 | 33108 | AN8816 |
| 132  | CONTIG161 | 251932 | 252300 | 3.1  | 0.00E+00 | transcription_start_site | + | 254844 | 254844 | -2728 | 33109 | AN8816 |
| 132  | CONTIG161 | 251932 | 252300 | 3.1  | 0.00E+00 | transcription_start_site | + | 255011 | 255011 | -2895 | 33110 | AN8816 |
| 132  | CONTIG161 | 251932 | 252300 | 3.1  | 0.00E+00 | transcription_start_site | + | 256268 | 256268 | -4152 | 33111 | AN8816 |
| 1736 | CONTIG161 | 260482 | 260916 | 1.49 | 1.66E-01 | transcription_start_site | + | 260682 | 260682 | 17    | 33112 | AN8817 |
| 1736 | CONTIG161 | 260482 | 260916 | 1.49 | 1.66E-01 | transcription_start_site | + | 261009 | 261009 | -310  | 33113 | AN8817 |
| 2566 | CONTIG162 | 4951   | 5245   | 1.18 | 1.44E-01 | transcription_start_site | - | 5690   | 5690   | 592   | 33127 | AN8822 |
| 2164 | CONTIG162 | 11121  | 11395  | 1.31 | 9.24E-02 | transcription_start_site | + | 10737  | 10737  | 521   | 33134 | AN8823 |
| 2164 | CONTIG162 | 11121  | 11395  | 1.31 | 9.24E-02 | transcription_start_site | + | 10585  | 10585  | 673   | 33133 | AN8823 |
| 2566 | CONTIG162 | 4951   | 5245   | 1.18 | 1.44E-01 | transcription_start_site | + | 7265   | 7265   | -2167 | 33128 | AN8823 |
| 2566 | CONTIG162 | 4951   | 5245   | 1.18 | 1.44E-01 | transcription_start_site | + | 7586   | 7586   | -2488 | 33129 | AN8823 |
| 2566 | CONTIG162 | 4951   | 5245   | 1.18 | 1.44E-01 | transcription_start_site | + | 8131   | 8131   | -3033 | 33130 | AN8823 |
| 2566 | CONTIG162 | 4951   | 5245   | 1.18 | 1.44E-01 | transcription_start_site | + | 8777   | 8777   | -3679 | 33131 | AN8823 |
| 2566 | CONTIG162 | 4951   | 5245   | 1.18 | 1.44E-01 | transcription_start_site | + | 8916   | 8916   | -3818 | 33132 | AN8823 |
| 2164 | CONTIG162 | 11121  | 11395  | 1.31 | 9.24E-02 | transcription_start_site | + | 12021  | 12021  | -763  | 33135 | AN8824 |
| 2164 | CONTIG162 | 11121  | 11395  | 1.31 | 9.24E-02 | transcription_start_site | + | 12112  | 12112  | -854  | 33136 | AN8824 |
| 2164 | CONTIG162 | 11121  | 11395  | 1.31 | 9.24E-02 | transcription_start_site | + | 12240  | 12240  | -982  | 33137 | AN8824 |
| 2164 | CONTIG162 | 11121  | 11395  | 1.31 | 9.24E-02 | transcription_start_site | + | 12398  | 12398  | -1140 | 33138 | AN8824 |
| 2164 | CONTIG162 | 11121  | 11395  | 1.31 | 9.24E-02 | transcription_start_site | + | 12652  | 12652  | -1394 | 33139 | AN8824 |
| 561  | CONTIG162 | 31745  | 32009  | 2.37 | 1.22E-03 | transcription_start_site | - | 27311  | 27311  | -4566 | 33147 | AN8827 |
| 561  | CONTIG162 | 31745  | 32009  | 2.37 | 1.22E-03 | transcription_start_site | - | 27121  | 27121  | -4756 | 33148 | AN8827 |
| 561  | CONTIG162 | 31745  | 32009  | 2.37 | 1.22E-03 | transcription_start_site | - | 26983  | 26983  | -4894 | 33149 | AN8827 |
| 561  | CONTIG162 | 31745  | 32009  | 2.37 | 1.22E-03 | transcription_start_site | - | 26783  | 26783  | -5094 | 33150 | AN8827 |
| 1036 | CONTIG162 | 29704  | 30143  | 1.88 | 4.81E-03 | transcription_start_site | - | 27311  | 27311  | -2612 | 33147 | AN8827 |
| 1036 | CONTIG162 | 29704  | 30143  | 1.88 | 4.81E-03 | transcription_start_site | - | 27121  | 27121  | -2802 | 33148 | AN8827 |
| 1036 | CONTIG162 | 29704  | 30143  | 1.88 | 4.81E-03 | transcription_start_site | - | 26983  | 26983  | -2940 | 33149 | AN8827 |
| 1036 | CONTIG162 | 29704  | 30143  | 1.88 | 4.81E-03 | transcription_start_site | - | 26783  | 26783  | -3140 | 33150 | AN8827 |
| 1036 | CONTIG162 | 29704  | 30143  | 1.88 | 4.81E-03 | transcription_start_site | - | 25942  | 25942  | -3981 | 33151 | AN8827 |
| 1036 | CONTIG162 | 29704  | 30143  | 1.88 | 4.81E-03 | transcription_start_site | - | 25756  | 25756  | -4167 | 33152 | AN8827 |
| 561  | CONTIG162 | 31745  | 32009  | 2.37 | 1.22E-03 | transcription_start_site | - | 29598  | 29598  | -2279 | 33158 | AN8829 |
| 561  | CONTIG162 | 31745  | 32009  | 2.37 | 1.22E-03 | transcription_start_site | - | 29319  | 29319  | -2558 | 33159 | AN8829 |
| 1036 | CONTIG162 | 29704  | 30143  | 1.88 | 4.81E-03 | transcription_start_site | - | 29598  | 29598  | -325  | 33158 | AN8829 |
| 1036 | CONTIG162 | 29704  | 30143  | 1.88 | 4.81E-03 | transcription_start_site | - | 29319  | 29319  | -604  | 33159 | AN8829 |
| 1272 | CONTIG162 | 33455  | 33970  | 1.71 | 2.12E-02 | transcription_start_site | - | 29598  | 29598  | -4114 | 33158 | AN8829 |
| 1272 | CONTIG162 | 33455  | 33970  | 1.71 | 2.12E-02 | transcription_start_site | - | 29319  | 29319  | -4393 | 33159 | AN8829 |
| 561  | CONTIG162 | 31745  | 32009  | 2.37 | 1.22E-03 | transcription_start_site | + | 34528  | 34528  | -2651 | 33160 | AN8830 |

|      |           |       |       |      |          |                          |   |       |       |       |       |        |
|------|-----------|-------|-------|------|----------|--------------------------|---|-------|-------|-------|-------|--------|
| 561  | CONTIG162 | 31745 | 32009 | 2.37 | 1.22E-03 | transcription_start_site | + | 36027 | 36027 | -4150 | 33161 | AN8830 |
| 1036 | CONTIG162 | 29704 | 30143 | 1.88 | 4.81E-03 | transcription_start_site | + | 34528 | 34528 | -4604 | 33160 | AN8830 |
| 1272 | CONTIG162 | 33455 | 33970 | 1.71 | 2.12E-02 | transcription_start_site | + | 34528 | 34528 | -815  | 33160 | AN8830 |
| 1272 | CONTIG162 | 33455 | 33970 | 1.71 | 2.12E-02 | transcription_start_site | + | 36027 | 36027 | -2314 | 33161 | AN8830 |
| 1619 | CONTIG162 | 36844 | 37110 | 1.53 | 4.36E-02 | transcription_start_site | + | 36027 | 36027 | 950   | 33161 | AN8830 |
| 1619 | CONTIG162 | 36844 | 37110 | 1.53 | 4.36E-02 | transcription_start_site | + | 41475 | 41475 | -4498 | 33162 | AN8831 |
| 1619 | CONTIG162 | 36844 | 37110 | 1.53 | 4.36E-02 | transcription_start_site | + | 41592 | 41592 | -4615 | 33163 | AN8831 |
| 1619 | CONTIG162 | 36844 | 37110 | 1.53 | 4.36E-02 | transcription_start_site | + | 41795 | 41795 | -4818 | 33164 | AN8831 |
| 382  | CONTIG162 | 56033 | 56387 | 2.63 | 2.16E-04 | transcription_start_site | - | 55839 | 55839 | -371  | 33169 | AN8836 |
| 382  | CONTIG162 | 56033 | 56387 | 2.63 | 2.16E-04 | transcription_start_site | - | 55563 | 55563 | -647  | 33170 | AN8836 |
| 382  | CONTIG162 | 56033 | 56387 | 2.63 | 2.16E-04 | transcription_start_site | - | 53774 | 53774 | -2436 | 33171 | AN8836 |
| 382  | CONTIG162 | 56033 | 56387 | 2.63 | 2.16E-04 | transcription_start_site | - | 53623 | 53623 | -2587 | 33172 | AN8836 |
| 1812 | CONTIG162 | 54603 | 55037 | 1.45 | 5.88E-02 | transcription_start_site | - | 55563 | 55563 | 743   | 33170 | AN8836 |
| 1812 | CONTIG162 | 54603 | 55037 | 1.45 | 5.88E-02 | transcription_start_site | - | 55839 | 55839 | 1019  | 33169 | AN8836 |
| 1812 | CONTIG162 | 54603 | 55037 | 1.45 | 5.88E-02 | transcription_start_site | - | 53774 | 53774 | -1046 | 33171 | AN8836 |
| 1812 | CONTIG162 | 54603 | 55037 | 1.45 | 5.88E-02 | transcription_start_site | - | 53623 | 53623 | -1197 | 33172 | AN8836 |
| 2575 | CONTIG163 | 2331  | 2750  | 1.17 | 8.81E-03 | transcription_start_site | + | 4010  | 4010  | -1469 | 33176 | AN8839 |
| 2575 | CONTIG163 | 2331  | 2750  | 1.17 | 8.81E-03 | transcription_start_site | + | 4576  | 4576  | -2035 | 33177 | AN8839 |
| 3065 | CONTIG163 | 8862  | 9301  | 0.66 | 1.93E-01 | transcription_start_site | - | 8462  | 8462  | -619  | 33178 | AN8840 |
| 3065 | CONTIG163 | 8862  | 9301  | 0.66 | 1.93E-01 | transcription_start_site | - | 7395  | 7395  | -1686 | 33179 | AN8840 |
| 3065 | CONTIG163 | 8862  | 9301  | 0.66 | 1.93E-01 | transcription_start_site | - | 7216  | 7216  | -1865 | 33180 | AN8840 |
| 3065 | CONTIG163 | 8862  | 9301  | 0.66 | 1.93E-01 | transcription_start_site | + | 9292  | 9292  | -210  | 33181 | AN8841 |
| 3010 | CONTIG163 | 24615 | 24879 | 0.9  | 5.22E-02 | transcription_start_site | - | 20135 | 20135 | -4612 | 33187 | AN8844 |
| 3010 | CONTIG163 | 24615 | 24879 | 0.9  | 5.22E-02 | transcription_start_site | - | 19966 | 19966 | -4781 | 33188 | AN8844 |
| 3010 | CONTIG163 | 24615 | 24879 | 0.9  | 5.22E-02 | transcription_start_site | - | 19817 | 19817 | -4930 | 33189 | AN8844 |
| 3010 | CONTIG163 | 24615 | 24879 | 0.9  | 5.22E-02 | transcription_start_site | - | 19694 | 19694 | -5053 | 33190 | AN8844 |
| 3034 | CONTIG163 | 20195 | 20454 | 0.82 | 8.01E-02 | transcription_start_site | - | 20135 | 20135 | -189  | 33187 | AN8844 |
| 3034 | CONTIG163 | 20195 | 20454 | 0.82 | 8.01E-02 | transcription_start_site | - | 19966 | 19966 | -358  | 33188 | AN8844 |
| 3034 | CONTIG163 | 20195 | 20454 | 0.82 | 8.01E-02 | transcription_start_site | - | 19817 | 19817 | -507  | 33189 | AN8844 |
| 3034 | CONTIG163 | 20195 | 20454 | 0.82 | 8.01E-02 | transcription_start_site | - | 19694 | 19694 | -630  | 33190 | AN8844 |
| 3034 | CONTIG163 | 20195 | 20454 | 0.82 | 8.01E-02 | transcription_start_site | + | 20957 | 20957 | -632  | 33191 | AN8845 |
| 3010 | CONTIG163 | 24615 | 24879 | 0.9  | 5.22E-02 | transcription_start_site | + | 24089 | 24089 | 658   | 33193 | AN8846 |
| 3010 | CONTIG163 | 24615 | 24879 | 0.9  | 5.22E-02 | transcription_start_site | + | 24003 | 24003 | 744   | 33192 | AN8846 |
| 3034 | CONTIG163 | 20195 | 20454 | 0.82 | 8.01E-02 | transcription_start_site | + | 24003 | 24003 | -3678 | 33192 | AN8846 |
| 3034 | CONTIG163 | 20195 | 20454 | 0.82 | 8.01E-02 | transcription_start_site | + | 24089 | 24089 | -3764 | 33193 | AN8846 |
| 3010 | CONTIG163 | 24615 | 24879 | 0.9  | 5.22E-02 | transcription_start_site | + | 27900 | 27900 | -3153 | 33195 | AN8848 |
| 3010 | CONTIG163 | 24615 | 24879 | 0.9  | 5.22E-02 | transcription_start_site | + | 28203 | 28203 | -3456 | 33196 | AN8848 |
| 3010 | CONTIG163 | 24615 | 24879 | 0.9  | 5.22E-02 | transcription_start_site | + | 28346 | 28346 | -3599 | 33197 | AN8848 |
| 3010 | CONTIG163 | 24615 | 24879 | 0.9  | 5.22E-02 | transcription_start_site | + | 28772 | 28772 | -4025 | 33198 | AN8848 |
| 3010 | CONTIG163 | 24615 | 24879 | 0.9  | 5.22E-02 | transcription_start_site | + | 29845 | 29845 | -5098 | 33199 | AN8849 |
| 2837 | CONTIG163 | 42240 | 42521 | 1.04 | 2.12E-02 | transcription_start_site | - | 41849 | 41849 | -531  | 33209 | AN8853 |
| 2837 | CONTIG163 | 42240 | 42521 | 1.04 | 2.12E-02 | transcription_start_site | - | 41668 | 41668 | -712  | 33210 | AN8853 |
| 2837 | CONTIG163 | 42240 | 42521 | 1.04 | 2.12E-02 | transcription_start_site | - | 41562 | 41562 | -818  | 33211 | AN8853 |
| 2837 | CONTIG163 | 42240 | 42521 | 1.04 | 2.12E-02 | transcription_start_site | - | 40377 | 40377 | -2003 | 33212 | AN8853 |
| 3035 | CONTIG163 | 46655 | 47319 | 0.82 | 8.01E-02 | transcription_start_site | - | 41849 | 41849 | -5138 | 33209 | AN8853 |
| 3035 | CONTIG163 | 46655 | 47319 | 0.82 | 8.01E-02 | transcription_start_site | - | 41668 | 41668 | -5319 | 33210 | AN8853 |
| 2837 | CONTIG163 | 42240 | 42521 | 1.04 | 2.12E-02 | transcription_start_site | + | 43481 | 43481 | -1100 | 33213 | AN8854 |
| 2837 | CONTIG163 | 42240 | 42521 | 1.04 | 2.12E-02 | transcription_start_site | + | 43696 | 43696 | -1315 | 33214 | AN8854 |
| 2837 | CONTIG163 | 42240 | 42521 | 1.04 | 2.12E-02 | transcription_start_site | + | 44455 | 44455 | -2074 | 33215 | AN8854 |
| 2837 | CONTIG163 | 42240 | 42521 | 1.04 | 2.12E-02 | transcription_start_site | + | 44593 | 44593 | -2212 | 33216 | AN8854 |
| 2837 | CONTIG163 | 42240 | 42521 | 1.04 | 2.12E-02 | transcription_start_site | + | 44824 | 44824 | -2443 | 33217 | AN8854 |
| 2837 | CONTIG163 | 42240 | 42521 | 1.04 | 2.12E-02 | transcription_start_site | + | 44936 | 44936 | -2555 | 33218 | AN8854 |
| 3035 | CONTIG163 | 46655 | 47319 | 0.82 | 8.01E-02 | transcription_start_site | - | 46483 | 46483 | -504  | 33219 | AN8855 |
| 2837 | CONTIG163 | 42240 | 42521 | 1.04 | 2.12E-02 | transcription_start_site | + | 46739 | 46739 | -4358 | 33220 | AN8856 |
| 2837 | CONTIG163 | 42240 | 42521 | 1.04 | 2.12E-02 | transcription_start_site | + | 47030 | 47030 | -4649 | 33221 | AN8856 |
| 2837 | CONTIG163 | 42240 | 42521 | 1.04 | 2.12E-02 | transcription_start_site | + | 47164 | 47164 | -4783 | 33222 | AN8856 |
| 2837 | CONTIG163 | 42240 | 42521 | 1.04 | 2.12E-02 | transcription_start_site | + | 47506 | 47506 | -5125 | 33223 | AN8856 |

|      |           |       |       |      |          |                          |   |       |       |       |       |        |
|------|-----------|-------|-------|------|----------|--------------------------|---|-------|-------|-------|-------|--------|
| 3035 | CONTIG163 | 46655 | 47319 | 0.82 | 8.01E-02 | transcription_start_site | + | 47030 | 47030 | -43   | 33221 | AN8856 |
| 3035 | CONTIG163 | 46655 | 47319 | 0.82 | 8.01E-02 | transcription_start_site | + | 47164 | 47164 | -177  | 33222 | AN8856 |
| 3035 | CONTIG163 | 46655 | 47319 | 0.82 | 8.01E-02 | transcription_start_site | + | 46739 | 46739 | 248   | 33220 | AN8856 |
| 3035 | CONTIG163 | 46655 | 47319 | 0.82 | 8.01E-02 | transcription_start_site | + | 47506 | 47506 | -519  | 33223 | AN8856 |
| 3035 | CONTIG163 | 46655 | 47319 | 0.82 | 8.01E-02 | transcription_start_site | + | 48738 | 48738 | -1751 | 33224 | AN8857 |
| 3035 | CONTIG163 | 46655 | 47319 | 0.82 | 8.01E-02 | transcription_start_site | + | 48988 | 48988 | -2001 | 33225 | AN8857 |
| 3035 | CONTIG163 | 46655 | 47319 | 0.82 | 8.01E-02 | transcription_start_site | + | 49182 | 49182 | -2195 | 33226 | AN8857 |
| 3057 | CONTIG163 | 55671 | 56095 | 0.72 | 1.44E-01 | transcription_start_site | - | 52412 | 52412 | -3471 | 33227 | AN8858 |
| 3066 | CONTIG163 | 52666 | 53080 | 0.66 | 1.93E-01 | transcription_start_site | - | 52412 | 52412 | -461  | 33227 | AN8858 |
| 3057 | CONTIG163 | 55671 | 56095 | 0.72 | 1.44E-01 | transcription_start_site | - | 55500 | 55500 | -383  | 33228 | AN8859 |
| 3057 | CONTIG163 | 55671 | 56095 | 0.72 | 1.44E-01 | transcription_start_site | - | 55295 | 55295 | -588  | 33229 | AN8859 |
| 3057 | CONTIG163 | 55671 | 56095 | 0.72 | 1.44E-01 | transcription_start_site | - | 55133 | 55133 | -750  | 33230 | AN8859 |
| 3057 | CONTIG163 | 55671 | 56095 | 0.72 | 1.44E-01 | transcription_start_site | - | 53827 | 53827 | -2056 | 33231 | AN8859 |
| 3066 | CONTIG163 | 52666 | 53080 | 0.66 | 1.93E-01 | transcription_start_site | - | 53827 | 53827 | 954   | 33231 | AN8859 |
| 3057 | CONTIG163 | 55671 | 56095 | 0.72 | 1.44E-01 | transcription_start_site | + | 58079 | 58079 | -2196 | 33232 | AN8860 |
| 3057 | CONTIG163 | 55671 | 56095 | 0.72 | 1.44E-01 | transcription_start_site | + | 58332 | 58332 | -2449 | 33233 | AN8860 |
| 3057 | CONTIG163 | 55671 | 56095 | 0.72 | 1.44E-01 | transcription_start_site | + | 58549 | 58549 | -2666 | 33234 | AN8860 |
| 3066 | CONTIG163 | 52666 | 53080 | 0.66 | 1.93E-01 | transcription_start_site | + | 58079 | 58079 | -5206 | 33232 | AN8860 |
| 3054 | CONTIG163 | 67730 | 68023 | 0.74 | 1.25E-01 | transcription_start_site | - | 65093 | 65093 | -2783 | 33241 | AN8862 |
| 3054 | CONTIG163 | 67730 | 68023 | 0.74 | 1.25E-01 | transcription_start_site | - | 64912 | 64912 | -2964 | 33242 | AN8862 |
| 3054 | CONTIG163 | 67730 | 68023 | 0.74 | 1.25E-01 | transcription_start_site | - | 64730 | 64730 | -3146 | 33243 | AN8862 |
| 3054 | CONTIG163 | 67730 | 68023 | 0.74 | 1.25E-01 | transcription_start_site | - | 64483 | 64483 | -3393 | 33244 | AN8862 |
| 3054 | CONTIG163 | 67730 | 68023 | 0.74 | 1.25E-01 | transcription_start_site | - | 67620 | 67620 | -256  | 33248 | AN8863 |
| 3054 | CONTIG163 | 67730 | 68023 | 0.74 | 1.25E-01 | transcription_start_site | - | 67487 | 67487 | -389  | 33249 | AN8863 |
| 3054 | CONTIG163 | 67730 | 68023 | 0.74 | 1.25E-01 | transcription_start_site | - | 67343 | 67343 | -533  | 33250 | AN8863 |
| 3054 | CONTIG163 | 67730 | 68023 | 0.74 | 1.25E-01 | transcription_start_site | - | 66580 | 66580 | -1296 | 33251 | AN8863 |
| 3054 | CONTIG163 | 67730 | 68023 | 0.74 | 1.25E-01 | transcription_start_site | - | 66180 | 66180 | -1696 | 33252 | AN8863 |
| 3054 | CONTIG163 | 67730 | 68023 | 0.74 | 1.25E-01 | transcription_start_site | + | 68566 | 68566 | -689  | 33253 | AN8864 |
| 3054 | CONTIG163 | 67730 | 68023 | 0.74 | 1.25E-01 | transcription_start_site | + | 68704 | 68704 | -827  | 33254 | AN8864 |
| 3054 | CONTIG163 | 67730 | 68023 | 0.74 | 1.25E-01 | transcription_start_site | + | 68798 | 68798 | -921  | 33255 | AN8864 |
| 3054 | CONTIG163 | 67730 | 68023 | 0.74 | 1.25E-01 | transcription_start_site | + | 69376 | 69376 | -1499 | 33256 | AN8864 |
| 3054 | CONTIG163 | 67730 | 68023 | 0.74 | 1.25E-01 | transcription_start_site | + | 69763 | 69763 | -1886 | 33257 | AN8864 |
| 3054 | CONTIG163 | 67730 | 68023 | 0.74 | 1.25E-01 | transcription_start_site | + | 69944 | 69944 | -2067 | 33258 | AN8864 |
| 3054 | CONTIG163 | 67730 | 68023 | 0.74 | 1.25E-01 | transcription_start_site | + | 70058 | 70058 | -2181 | 33259 | AN8864 |
| 3054 | CONTIG163 | 67730 | 68023 | 0.74 | 1.25E-01 | transcription_start_site | + | 70234 | 70234 | -2357 | 33260 | AN8864 |
| 3054 | CONTIG163 | 67730 | 68023 | 0.74 | 1.25E-01 | transcription_start_site | + | 70626 | 70626 | -2749 | 33261 | AN8864 |
| 3054 | CONTIG163 | 67730 | 68023 | 0.74 | 1.25E-01 | transcription_start_site | + | 70829 | 70829 | -2952 | 33262 | AN8864 |
| 3054 | CONTIG163 | 67730 | 68023 | 0.74 | 1.25E-01 | transcription_start_site | + | 70989 | 70989 | -3112 | 33263 | AN8864 |
| 3054 | CONTIG163 | 67730 | 68023 | 0.74 | 1.25E-01 | transcription_start_site | + | 71389 | 71389 | -3512 | 33264 | AN8864 |
| 3054 | CONTIG163 | 67730 | 68023 | 0.74 | 1.25E-01 | transcription_start_site | + | 71544 | 71544 | -3667 | 33265 | AN8864 |
| 3054 | CONTIG163 | 67730 | 68023 | 0.74 | 1.25E-01 | transcription_start_site | + | 72051 | 72051 | -4174 | 33266 | AN8864 |
| 3054 | CONTIG163 | 67730 | 68023 | 0.74 | 1.25E-01 | transcription_start_site | + | 72243 | 72243 | -4366 | 33267 | AN8864 |
| 3054 | CONTIG163 | 67730 | 68023 | 0.74 | 1.25E-01 | transcription_start_site | + | 72523 | 72523 | -4646 | 33268 | AN8864 |
| 3054 | CONTIG163 | 67730 | 68023 | 0.74 | 1.25E-01 | transcription_start_site | + | 72695 | 72695 | -4818 | 33269 | AN8864 |
| 3054 | CONTIG163 | 67730 | 68023 | 0.74 | 1.25E-01 | transcription_start_site | + | 72796 | 72796 | -4919 | 33270 | AN8864 |
| 3054 | CONTIG163 | 67730 | 68023 | 0.74 | 1.25E-01 | transcription_start_site | + | 72996 | 72996 | -5119 | 33271 | AN8864 |
| 2721 | CONTIG163 | 78770 | 79116 | 1.11 | 5.41E-03 | transcription_start_site | - | 78492 | 78492 | -451  | 33281 | AN8866 |
| 2721 | CONTIG163 | 78770 | 79116 | 1.11 | 5.41E-03 | transcription_start_site | - | 78114 | 78114 | -829  | 33282 | AN8866 |
| 2721 | CONTIG163 | 78770 | 79116 | 1.11 | 5.41E-03 | transcription_start_site | - | 77742 | 77742 | -1201 | 33283 | AN8866 |
| 2721 | CONTIG163 | 78770 | 79116 | 1.11 | 5.41E-03 | transcription_start_site | - | 77106 | 77106 | -1837 | 33284 | AN8866 |
| 2721 | CONTIG163 | 78770 | 79116 | 1.11 | 5.41E-03 | transcription_start_site | - | 77014 | 77014 | -1929 | 33285 | AN8866 |
| 2721 | CONTIG163 | 78770 | 79116 | 1.11 | 5.41E-03 | transcription_start_site | - | 76898 | 76898 | -2045 | 33286 | AN8866 |
| 2721 | CONTIG163 | 78770 | 79116 | 1.11 | 5.41E-03 | transcription_start_site | - | 76760 | 76760 | -2183 | 33287 | AN8866 |
| 2801 | CONTIG163 | 82881 | 83157 | 1.06 | 1.84E-02 | transcription_start_site | - | 78492 | 78492 | -4527 | 33281 | AN8866 |
| 2801 | CONTIG163 | 82881 | 83157 | 1.06 | 1.84E-02 | transcription_start_site | - | 78114 | 78114 | -4905 | 33282 | AN8866 |
| 2721 | CONTIG163 | 78770 | 79116 | 1.11 | 5.41E-03 | transcription_start_site | - | 79675 | 79675 | 732   | 33294 | AN8867 |
| 2721 | CONTIG163 | 78770 | 79116 | 1.11 | 5.41E-03 | transcription_start_site | - | 80097 | 80097 | 1154  | 33293 | AN8867 |

|                |       |       |      |          |                          |   |       |       |       |       |        |
|----------------|-------|-------|------|----------|--------------------------|---|-------|-------|-------|-------|--------|
| 2801 CONTIG163 | 82881 | 83157 | 1.06 | 1.84E-02 | transcription_start_site | - | 81266 | 81266 | -1753 | 33288 | AN8867 |
| 2801 CONTIG163 | 82881 | 83157 | 1.06 | 1.84E-02 | transcription_start_site | - | 81072 | 81072 | -1947 | 33289 | AN8867 |
| 2801 CONTIG163 | 82881 | 83157 | 1.06 | 1.84E-02 | transcription_start_site | - | 80940 | 80940 | -2079 | 33290 | AN8867 |
| 2801 CONTIG163 | 82881 | 83157 | 1.06 | 1.84E-02 | transcription_start_site | - | 80716 | 80716 | -2303 | 33291 | AN8867 |
| 2801 CONTIG163 | 82881 | 83157 | 1.06 | 1.84E-02 | transcription_start_site | - | 80242 | 80242 | -2777 | 33292 | AN8867 |
| 2801 CONTIG163 | 82881 | 83157 | 1.06 | 1.84E-02 | transcription_start_site | - | 80097 | 80097 | -2922 | 33293 | AN8867 |
| 2801 CONTIG163 | 82881 | 83157 | 1.06 | 1.84E-02 | transcription_start_site | - | 79675 | 79675 | -3344 | 33294 | AN8867 |
| 2801 CONTIG163 | 82881 | 83157 | 1.06 | 1.84E-02 | transcription_start_site | - | 82556 | 82556 | -463  | 33295 | AN8868 |
| 2801 CONTIG163 | 82881 | 83157 | 1.06 | 1.84E-02 | transcription_start_site | - | 82447 | 82447 | -572  | 33296 | AN8868 |
| 2801 CONTIG163 | 82881 | 83157 | 1.06 | 1.84E-02 | transcription_start_site | - | 82254 | 82254 | -765  | 33297 | AN8868 |
| 2801 CONTIG163 | 82881 | 83157 | 1.06 | 1.84E-02 | transcription_start_site | - | 82071 | 82071 | -948  | 33298 | AN8868 |
| 2752 CONTIG163 | 88216 | 88570 | 1.09 | 1.57E-02 | transcription_start_site | + | 87313 | 87313 | 1080  | 33302 | AN8869 |
| 2801 CONTIG163 | 82881 | 83157 | 1.06 | 1.84E-02 | transcription_start_site | + | 86454 | 86454 | -3435 | 33299 | AN8869 |
| 2801 CONTIG163 | 82881 | 83157 | 1.06 | 1.84E-02 | transcription_start_site | + | 86676 | 86676 | -3657 | 33300 | AN8869 |
| 2801 CONTIG163 | 82881 | 83157 | 1.06 | 1.84E-02 | transcription_start_site | + | 87086 | 87086 | -4067 | 33301 | AN8869 |
| 2801 CONTIG163 | 82881 | 83157 | 1.06 | 1.84E-02 | transcription_start_site | + | 87313 | 87313 | -4294 | 33302 | AN8869 |
| 2752 CONTIG163 | 88216 | 88570 | 1.09 | 1.57E-02 | transcription_start_site | + | 89153 | 89153 | -760  | 33303 | AN8870 |
| 2752 CONTIG163 | 88216 | 88570 | 1.09 | 1.57E-02 | transcription_start_site | + | 89237 | 89237 | -844  | 33304 | AN8870 |
| 2752 CONTIG163 | 88216 | 88570 | 1.09 | 1.57E-02 | transcription_start_site | + | 89372 | 89372 | -979  | 33305 | AN8870 |
| 2752 CONTIG163 | 88216 | 88570 | 1.09 | 1.57E-02 | transcription_start_site | + | 89470 | 89470 | -1077 | 33306 | AN8870 |
| 2752 CONTIG163 | 88216 | 88570 | 1.09 | 1.57E-02 | transcription_start_site | + | 90022 | 90022 | -1629 | 33307 | AN8870 |
| 2032 CONTIG164 | 41779 | 42128 | 1.36 | 3.08E-02 | transcription_start_site | - | 41584 | 41584 | -369  | 33330 | AN8881 |
| 2032 CONTIG164 | 41779 | 42128 | 1.36 | 3.08E-02 | transcription_start_site | - | 41419 | 41419 | -534  | 33331 | AN8881 |
| 2460 CONTIG164 | 43205 | 43635 | 1.21 | 3.61E-02 | transcription_start_site | - | 41584 | 41584 | -1836 | 33330 | AN8881 |
| 2460 CONTIG164 | 43205 | 43635 | 1.21 | 3.61E-02 | transcription_start_site | - | 41419 | 41419 | -2001 | 33331 | AN8881 |
| 2032 CONTIG164 | 41779 | 42128 | 1.36 | 3.08E-02 | transcription_start_site | + | 43692 | 43692 | -1738 | 33332 | AN8882 |
| 2032 CONTIG164 | 41779 | 42128 | 1.36 | 3.08E-02 | transcription_start_site | + | 44019 | 44019 | -2065 | 33333 | AN8882 |
| 2460 CONTIG164 | 43205 | 43635 | 1.21 | 3.61E-02 | transcription_start_site | + | 43692 | 43692 | -272  | 33332 | AN8882 |
| 2460 CONTIG164 | 43205 | 43635 | 1.21 | 3.61E-02 | transcription_start_site | + | 44019 | 44019 | -599  | 33333 | AN8882 |
| 3003 CONTIG164 | 39757 | 40101 | 0.92 | 1.93E-01 | transcription_start_site | + | 43692 | 43692 | -3763 | 33332 | AN8882 |
| 3003 CONTIG164 | 39757 | 40101 | 0.92 | 1.93E-01 | transcription_start_site | + | 44019 | 44019 | -4090 | 33333 | AN8882 |
| 260 CONTIG164  | 48385 | 48891 | 2.82 | 0.00E+00 | transcription_start_site | - | 45714 | 45714 | -2924 | 33334 | AN8883 |
| 260 CONTIG164  | 48385 | 48891 | 2.82 | 0.00E+00 | transcription_start_site | - | 45588 | 45588 | -3050 | 33335 | AN8883 |
| 260 CONTIG164  | 48385 | 48891 | 2.82 | 0.00E+00 | transcription_start_site | - | 45433 | 45433 | -3205 | 33336 | AN8883 |
| 260 CONTIG164  | 48385 | 48891 | 2.82 | 0.00E+00 | transcription_start_site | - | 45289 | 45289 | -3349 | 33337 | AN8883 |
| 1444 CONTIG164 | 57980 | 58259 | 1.61 | 8.81E-03 | transcription_start_site | - | 56954 | 56954 | -1165 | 33338 | AN8885 |
| 1444 CONTIG164 | 57980 | 58259 | 1.61 | 8.81E-03 | transcription_start_site | - | 56821 | 56821 | -1298 | 33339 | AN8885 |
| 1444 CONTIG164 | 57980 | 58259 | 1.61 | 8.81E-03 | transcription_start_site | - | 54114 | 54114 | -4005 | 33340 | AN8885 |
| 1444 CONTIG164 | 57980 | 58259 | 1.61 | 8.81E-03 | transcription_start_site | - | 53976 | 53976 | -4143 | 33341 | AN8885 |
| 1444 CONTIG164 | 57980 | 58259 | 1.61 | 8.81E-03 | transcription_start_site | + | 58531 | 58531 | -411  | 33342 | AN8886 |
| 1444 CONTIG164 | 57980 | 58259 | 1.61 | 8.81E-03 | transcription_start_site | + | 60798 | 60798 | -2678 | 33343 | AN8886 |
| 1049 CONTIG164 | 80182 | 80545 | 1.87 | 2.22E-03 | transcription_start_site | - | 79756 | 79756 | -607  | 33356 | AN8892 |
| 1049 CONTIG164 | 80182 | 80545 | 1.87 | 2.22E-03 | transcription_start_site | - | 79251 | 79251 | -1112 | 33357 | AN8892 |
| 1049 CONTIG164 | 80182 | 80545 | 1.87 | 2.22E-03 | transcription_start_site | - | 77875 | 77875 | -2488 | 33358 | AN8892 |
| 1049 CONTIG164 | 80182 | 80545 | 1.87 | 2.22E-03 | transcription_start_site | - | 77617 | 77617 | -2746 | 33359 | AN8892 |
| 1049 CONTIG164 | 80182 | 80545 | 1.87 | 2.22E-03 | transcription_start_site | - | 76952 | 76952 | -3411 | 33360 | AN8892 |
| 1049 CONTIG164 | 80182 | 80545 | 1.87 | 2.22E-03 | transcription_start_site | - | 75590 | 75590 | -4773 | 33361 | AN8892 |
| 1049 CONTIG164 | 80182 | 80545 | 1.87 | 2.22E-03 | transcription_start_site | - | 75188 | 75188 | -5175 | 33362 | AN8892 |
| 1049 CONTIG164 | 80182 | 80545 | 1.87 | 2.22E-03 | transcription_start_site | - | 81319 | 81319 | 955   | 33366 | AN8893 |
| 1049 CONTIG164 | 80182 | 80545 | 1.87 | 2.22E-03 | transcription_start_site | - | 81426 | 81426 | 1062  | 33365 | AN8893 |
| 1049 CONTIG164 | 80182 | 80545 | 1.87 | 2.22E-03 | transcription_start_site | - | 81541 | 81541 | 1177  | 33364 | AN8893 |
| 1588 CONTIG164 | 90007 | 90281 | 1.54 | 1.30E-02 | transcription_start_site | - | 85727 | 85727 | -4417 | 33367 | AN8894 |
| 1588 CONTIG164 | 90007 | 90281 | 1.54 | 1.30E-02 | transcription_start_site | - | 85452 | 85452 | -4692 | 33368 | AN8894 |
| 1588 CONTIG164 | 90007 | 90281 | 1.54 | 1.30E-02 | transcription_start_site | - | 85276 | 85276 | -4868 | 33369 | AN8894 |
| 1588 CONTIG164 | 90007 | 90281 | 1.54 | 1.30E-02 | transcription_start_site | + | 90286 | 90286 | -142  | 33374 | AN8896 |
| 1588 CONTIG164 | 90007 | 90281 | 1.54 | 1.30E-02 | transcription_start_site | + | 89819 | 89819 | 325   | 33373 | AN8896 |
| 1588 CONTIG164 | 90007 | 90281 | 1.54 | 1.30E-02 | transcription_start_site | + | 89424 | 89424 | 720   | 33372 | AN8896 |

|                |        |        |      |          |                          |   |        |        |       |       |        |
|----------------|--------|--------|------|----------|--------------------------|---|--------|--------|-------|-------|--------|
| 1100 CONTIG164 | 91292  | 91856  | 1.83 | 0.00E+00 | transcription_start_site | - | 91765  | 91765  | 191   | 33376 | AN8897 |
| 1100 CONTIG164 | 91292  | 91856  | 1.83 | 0.00E+00 | transcription_start_site | - | 92002  | 92002  | 428   | 33375 | AN8897 |
| 3070 CONTIG164 | 91892  | 95321  | 0.62 | 0.00E+00 | transcription_start_site | - | 92002  | 92002  | -1604 | 33375 | AN8897 |
| 3070 CONTIG164 | 91892  | 95321  | 0.62 | 0.00E+00 | transcription_start_site | - | 91765  | 91765  | -1841 | 33376 | AN8897 |
| 1100 CONTIG164 | 91292  | 91856  | 1.83 | 0.00E+00 | transcription_start_site | + | 92462  | 92462  | -888  | 33377 | AN8898 |
| 1588 CONTIG164 | 90007  | 90281  | 1.54 | 1.30E-02 | transcription_start_site | + | 92462  | 92462  | -2318 | 33377 | AN8898 |
| 3070 CONTIG164 | 91892  | 95321  | 0.62 | 0.00E+00 | transcription_start_site | + | 92462  | 92462  | 1144  | 33377 | AN8898 |
| 3070 CONTIG164 | 91892  | 95321  | 0.62 | 0.00E+00 | transcription_start_site | - | 94115  | 94115  | 508   | 33379 | AN8899 |
| 3070 CONTIG164 | 91892  | 95321  | 0.62 | 0.00E+00 | transcription_start_site | - | 95215  | 95215  | 1608  | 33378 | AN8899 |
| 3070 CONTIG164 | 91892  | 95321  | 0.62 | 0.00E+00 | transcription_start_site | + | 97869  | 97869  | -4262 | 33382 | AN8901 |
| 3070 CONTIG164 | 91892  | 95321  | 0.62 | 0.00E+00 | transcription_start_site | + | 99420  | 99420  | -5813 | 33383 | AN8901 |
| 1849 CONTIG164 | 104943 | 105502 | 1.43 | 1.06E-02 | transcription_start_site | - | 102115 | 102115 | -3107 | 33384 | AN8902 |
| 1849 CONTIG164 | 104943 | 105502 | 1.43 | 1.06E-02 | transcription_start_site | - | 101407 | 101407 | -3815 | 33385 | AN8902 |
| 1849 CONTIG164 | 104943 | 105502 | 1.43 | 1.06E-02 | transcription_start_site | - | 100915 | 100915 | -4307 | 33386 | AN8902 |
| 2867 CONTIG164 | 105838 | 106112 | 1.03 | 1.25E-01 | transcription_start_site | - | 102115 | 102115 | -3860 | 33384 | AN8902 |
| 2867 CONTIG164 | 105838 | 106112 | 1.03 | 1.25E-01 | transcription_start_site | - | 101407 | 101407 | -4568 | 33385 | AN8902 |
| 2867 CONTIG164 | 105838 | 106112 | 1.03 | 1.25E-01 | transcription_start_site | - | 100915 | 100915 | -5060 | 33386 | AN8902 |
| 1849 CONTIG164 | 104943 | 105502 | 1.43 | 1.06E-02 | transcription_start_site | - | 104710 | 104710 | -512  | 33387 | AN8903 |
| 1849 CONTIG164 | 104943 | 105502 | 1.43 | 1.06E-02 | transcription_start_site | - | 104337 | 104337 | -885  | 33388 | AN8903 |
| 1849 CONTIG164 | 104943 | 105502 | 1.43 | 1.06E-02 | transcription_start_site | - | 104156 | 104156 | -1066 | 33389 | AN8903 |
| 1849 CONTIG164 | 104943 | 105502 | 1.43 | 1.06E-02 | transcription_start_site | - | 103493 | 103493 | -1729 | 33390 | AN8903 |
| 2867 CONTIG164 | 105838 | 106112 | 1.03 | 1.25E-01 | transcription_start_site | - | 104710 | 104710 | -1265 | 33387 | AN8903 |
| 2867 CONTIG164 | 105838 | 106112 | 1.03 | 1.25E-01 | transcription_start_site | - | 104337 | 104337 | -1638 | 33388 | AN8903 |
| 2867 CONTIG164 | 105838 | 106112 | 1.03 | 1.25E-01 | transcription_start_site | - | 104156 | 104156 | -1819 | 33389 | AN8903 |
| 2867 CONTIG164 | 105838 | 106112 | 1.03 | 1.25E-01 | transcription_start_site | - | 103493 | 103493 | -2482 | 33390 | AN8903 |
| 3004 CONTIG164 | 135529 | 135878 | 0.92 | 1.93E-01 | transcription_start_site | - | 131698 | 131698 | -4005 | 33406 | AN8910 |
| 3004 CONTIG164 | 135529 | 135878 | 0.92 | 1.93E-01 | transcription_start_site | - | 130592 | 130592 | -5111 | 33407 | AN8910 |
| 1589 CONTIG164 | 138694 | 139118 | 1.54 | 1.30E-02 | transcription_start_site | + | 137715 | 137715 | 1191  | 33418 | AN8911 |
| 3004 CONTIG164 | 135529 | 135878 | 0.92 | 1.93E-01 | transcription_start_site | + | 136311 | 136311 | -607  | 33415 | AN8911 |
| 3004 CONTIG164 | 135529 | 135878 | 0.92 | 1.93E-01 | transcription_start_site | + | 136494 | 136494 | -790  | 33416 | AN8911 |
| 3004 CONTIG164 | 135529 | 135878 | 0.92 | 1.93E-01 | transcription_start_site | + | 137277 | 137277 | -1573 | 33417 | AN8911 |
| 3004 CONTIG164 | 135529 | 135878 | 0.92 | 1.93E-01 | transcription_start_site | + | 137715 | 137715 | -2011 | 33418 | AN8911 |
| 1589 CONTIG164 | 138694 | 139118 | 1.54 | 1.30E-02 | transcription_start_site | + | 139238 | 139238 | -332  | 33419 | AN8912 |
| 1589 CONTIG164 | 138694 | 139118 | 1.54 | 1.30E-02 | transcription_start_site | + | 139602 | 139602 | -696  | 33420 | AN8912 |
| 3004 CONTIG164 | 135529 | 135878 | 0.92 | 1.93E-01 | transcription_start_site | + | 139238 | 139238 | -3534 | 33419 | AN8912 |
| 3004 CONTIG164 | 135529 | 135878 | 0.92 | 1.93E-01 | transcription_start_site | + | 139602 | 139602 | -3898 | 33420 | AN8912 |
| 1252 CONTIG164 | 146194 | 146468 | 1.72 | 5.20E-03 | transcription_start_site | - | 141986 | 141986 | -4345 | 33421 | AN8913 |
| 1252 CONTIG164 | 146194 | 146468 | 1.72 | 5.20E-03 | transcription_start_site | - | 141793 | 141793 | -4538 | 33422 | AN8913 |
| 1252 CONTIG164 | 146194 | 146468 | 1.72 | 5.20E-03 | transcription_start_site | + | 145414 | 145414 | 917   | 33424 | AN8914 |
| 1252 CONTIG164 | 146194 | 146468 | 1.72 | 5.20E-03 | transcription_start_site | + | 145221 | 145221 | 1110  | 33423 | AN8914 |
| 1252 CONTIG164 | 146194 | 146468 | 1.72 | 5.20E-03 | transcription_start_site | + | 147952 | 147952 | -1621 | 33425 | AN8915 |
| 1252 CONTIG164 | 146194 | 146468 | 1.72 | 5.20E-03 | transcription_start_site | + | 148006 | 148006 | -1675 | 33426 | AN8915 |
| 1252 CONTIG164 | 146194 | 146468 | 1.72 | 5.20E-03 | transcription_start_site | + | 148610 | 148610 | -2279 | 33427 | AN8915 |
| 1252 CONTIG164 | 146194 | 146468 | 1.72 | 5.20E-03 | transcription_start_site | + | 148929 | 148929 | -2598 | 33428 | AN8915 |
| 1252 CONTIG164 | 146194 | 146468 | 1.72 | 5.20E-03 | transcription_start_site | + | 149593 | 149593 | -3262 | 33429 | AN8915 |
| 1328 CONTIG165 | 4521   | 4785   | 1.67 | 1.84E-02 | transcription_start_site | - | 5621   | 5621   | 968   | 33435 | AN8917 |
| 1328 CONTIG165 | 4521   | 4785   | 1.67 | 1.84E-02 | transcription_start_site | + | 9709   | 9709   | -5056 | 33436 | AN8918 |
| 2078 CONTIG165 | 16130  | 16414  | 1.34 | 6.84E-02 | transcription_start_site | - | 15119  | 15119  | -1153 | 33444 | AN8919 |
| 2078 CONTIG165 | 16130  | 16414  | 1.34 | 6.84E-02 | transcription_start_site | - | 14902  | 14902  | -1370 | 33445 | AN8919 |
| 2078 CONTIG165 | 16130  | 16414  | 1.34 | 6.84E-02 | transcription_start_site | + | 15774  | 15774  | 498   | 33448 | AN8920 |
| 2078 CONTIG165 | 16130  | 16414  | 1.34 | 6.84E-02 | transcription_start_site | + | 16790  | 16790  | -518  | 33449 | AN8920 |
| 2078 CONTIG165 | 16130  | 16414  | 1.34 | 6.84E-02 | transcription_start_site | + | 15560  | 15560  | 712   | 33447 | AN8920 |
| 2078 CONTIG165 | 16130  | 16414  | 1.34 | 6.84E-02 | transcription_start_site | + | 15436  | 15436  | 836   | 33446 | AN8920 |
| 2078 CONTIG165 | 16130  | 16414  | 1.34 | 6.84E-02 | transcription_start_site | + | 17650  | 17650  | -1378 | 33450 | AN8921 |
| 2078 CONTIG165 | 16130  | 16414  | 1.34 | 6.84E-02 | transcription_start_site | + | 18261  | 18261  | -1989 | 33451 | AN8921 |
| 2078 CONTIG165 | 16130  | 16414  | 1.34 | 6.84E-02 | transcription_start_site | + | 19631  | 19631  | -3359 | 33452 | AN8921 |
| 2078 CONTIG165 | 16130  | 16414  | 1.34 | 6.84E-02 | transcription_start_site | + | 19754  | 19754  | -3482 | 33453 | AN8921 |



|      |           |       |       |      |          |                          |   |       |       |       |       |        |
|------|-----------|-------|-------|------|----------|--------------------------|---|-------|-------|-------|-------|--------|
| 2078 | CONTIG165 | 16130 | 16414 | 1.34 | 6.84E-02 | transcription_start_site | + | 19862 | 19862 | -3590 | 33454 | AN8921 |
| 2078 | CONTIG165 | 16130 | 16414 | 1.34 | 6.84E-02 | transcription_start_site | + | 21066 | 21066 | -4794 | 33455 | AN8922 |
| 2078 | CONTIG165 | 16130 | 16414 | 1.34 | 6.84E-02 | transcription_start_site | + | 21354 | 21354 | -5082 | 33456 | AN8922 |
| 2835 | CONTIG165 | 25878 | 26227 | 1.05 | 1.93E-01 | transcription_start_site | + | 26137 | 26137 | -84   | 33460 | AN8924 |
| 2835 | CONTIG165 | 25878 | 26227 | 1.05 | 1.93E-01 | transcription_start_site | + | 26421 | 26421 | -368  | 33461 | AN8924 |
| 981  | CONTIG165 | 50180 | 50604 | 1.92 | 1.35E-03 | transcription_start_site | + | 50553 | 50553 | -161  | 33476 | AN8930 |
| 981  | CONTIG165 | 50180 | 50604 | 1.92 | 1.35E-03 | transcription_start_site | + | 50736 | 50736 | -344  | 33477 | AN8930 |
| 981  | CONTIG165 | 50180 | 50604 | 1.92 | 1.35E-03 | transcription_start_site | + | 51722 | 51722 | -1330 | 33478 | AN8930 |
| 981  | CONTIG165 | 50180 | 50604 | 1.92 | 1.35E-03 | transcription_start_site | + | 53086 | 53086 | -2694 | 33479 | AN8930 |
| 1975 | CONTIG165 | 55210 | 55479 | 1.38 | 5.88E-02 | transcription_start_site | - | 54677 | 54677 | -667  | 33480 | AN8931 |
| 981  | CONTIG165 | 50180 | 50604 | 1.92 | 1.35E-03 | transcription_start_site | + | 54942 | 54942 | -4550 | 33481 | AN8932 |
| 981  | CONTIG165 | 50180 | 50604 | 1.92 | 1.35E-03 | transcription_start_site | + | 55085 | 55085 | -4693 | 33482 | AN8932 |
| 1975 | CONTIG165 | 55210 | 55479 | 1.38 | 5.88E-02 | transcription_start_site | + | 55085 | 55085 | 259   | 33482 | AN8932 |
| 1975 | CONTIG165 | 55210 | 55479 | 1.38 | 5.88E-02 | transcription_start_site | + | 54942 | 54942 | 402   | 33481 | AN8932 |
| 2756 | CONTIG165 | 62785 | 63279 | 1.09 | 1.66E-01 | transcription_start_site | - | 58222 | 58222 | -4810 | 33483 | AN8933 |
| 2756 | CONTIG165 | 62785 | 63279 | 1.09 | 1.66E-01 | transcription_start_site | - | 60074 | 60074 | -2958 | 33487 | AN8934 |
| 2756 | CONTIG165 | 62785 | 63279 | 1.09 | 1.66E-01 | transcription_start_site | + | 63011 | 63011 | 21    | 33492 | AN8935 |
| 2756 | CONTIG165 | 62785 | 63279 | 1.09 | 1.66E-01 | transcription_start_site | + | 62591 | 62591 | 441   | 33491 | AN8935 |
| 2756 | CONTIG165 | 62785 | 63279 | 1.09 | 1.66E-01 | transcription_start_site | + | 62056 | 62056 | 976   | 33490 | AN8935 |
| 2756 | CONTIG165 | 62785 | 63279 | 1.09 | 1.66E-01 | transcription_start_site | + | 61879 | 61879 | 1153  | 33489 | AN8935 |
| 2075 | CONTIG165 | 69841 | 70260 | 1.34 | 5.05E-02 | transcription_start_site | - | 66710 | 66710 | -3340 | 33493 | AN8936 |
| 2075 | CONTIG165 | 69841 | 70260 | 1.34 | 5.05E-02 | transcription_start_site | - | 66406 | 66406 | -3644 | 33494 | AN8936 |
| 2075 | CONTIG165 | 69841 | 70260 | 1.34 | 5.05E-02 | transcription_start_site | - | 65777 | 65777 | -4273 | 33495 | AN8936 |
| 2075 | CONTIG165 | 69841 | 70260 | 1.34 | 5.05E-02 | transcription_start_site | - | 65618 | 65618 | -4432 | 33496 | AN8936 |
| 2075 | CONTIG165 | 69841 | 70260 | 1.34 | 5.05E-02 | transcription_start_site | - | 65024 | 65024 | -5026 | 33497 | AN8936 |
| 2757 | CONTIG165 | 67055 | 67419 | 1.09 | 1.66E-01 | transcription_start_site | - | 66710 | 66710 | -527  | 33493 | AN8936 |
| 2757 | CONTIG165 | 67055 | 67419 | 1.09 | 1.66E-01 | transcription_start_site | - | 66406 | 66406 | -831  | 33494 | AN8936 |
| 2757 | CONTIG165 | 67055 | 67419 | 1.09 | 1.66E-01 | transcription_start_site | - | 65777 | 65777 | -1460 | 33495 | AN8936 |
| 2757 | CONTIG165 | 67055 | 67419 | 1.09 | 1.66E-01 | transcription_start_site | - | 65618 | 65618 | -1619 | 33496 | AN8936 |
| 2757 | CONTIG165 | 67055 | 67419 | 1.09 | 1.66E-01 | transcription_start_site | - | 65024 | 65024 | -2213 | 33497 | AN8936 |
| 2758 | CONTIG165 | 68555 | 68919 | 1.09 | 1.66E-01 | transcription_start_site | - | 66710 | 66710 | -2027 | 33493 | AN8936 |
| 2758 | CONTIG165 | 68555 | 68919 | 1.09 | 1.66E-01 | transcription_start_site | - | 66406 | 66406 | -2331 | 33494 | AN8936 |
| 2758 | CONTIG165 | 68555 | 68919 | 1.09 | 1.66E-01 | transcription_start_site | - | 65777 | 65777 | -2960 | 33495 | AN8936 |
| 2758 | CONTIG165 | 68555 | 68919 | 1.09 | 1.66E-01 | transcription_start_site | - | 65618 | 65618 | -3119 | 33496 | AN8936 |
| 2758 | CONTIG165 | 68555 | 68919 | 1.09 | 1.66E-01 | transcription_start_site | - | 65024 | 65024 | -3713 | 33497 | AN8936 |
| 2756 | CONTIG165 | 62785 | 63279 | 1.09 | 1.66E-01 | transcription_start_site | + | 67143 | 67143 | -4111 | 33498 | AN8937 |
| 2756 | CONTIG165 | 62785 | 63279 | 1.09 | 1.66E-01 | transcription_start_site | + | 67667 | 67667 | -4635 | 33499 | AN8937 |
| 2756 | CONTIG165 | 62785 | 63279 | 1.09 | 1.66E-01 | transcription_start_site | + | 67749 | 67749 | -4717 | 33500 | AN8937 |
| 2757 | CONTIG165 | 67055 | 67419 | 1.09 | 1.66E-01 | transcription_start_site | + | 67143 | 67143 | 94    | 33498 | AN8937 |
| 2757 | CONTIG165 | 67055 | 67419 | 1.09 | 1.66E-01 | transcription_start_site | + | 67667 | 67667 | -430  | 33499 | AN8937 |
| 2757 | CONTIG165 | 67055 | 67419 | 1.09 | 1.66E-01 | transcription_start_site | + | 67749 | 67749 | -512  | 33500 | AN8937 |
| 2758 | CONTIG165 | 68555 | 68919 | 1.09 | 1.66E-01 | transcription_start_site | + | 67749 | 67749 | 988   | 33500 | AN8937 |
| 2758 | CONTIG165 | 68555 | 68919 | 1.09 | 1.66E-01 | transcription_start_site | + | 67667 | 67667 | 1070  | 33499 | AN8937 |
| 2075 | CONTIG165 | 69841 | 70260 | 1.34 | 5.05E-02 | transcription_start_site | - | 70054 | 70054 | 3     | 33501 | AN8938 |
| 2075 | CONTIG165 | 69841 | 70260 | 1.34 | 5.05E-02 | transcription_start_site | - | 69893 | 69893 | -157  | 33502 | AN8938 |
| 2075 | CONTIG165 | 69841 | 70260 | 1.34 | 5.05E-02 | transcription_start_site | - | 68168 | 68168 | -1882 | 33503 | AN8938 |
| 2757 | CONTIG165 | 67055 | 67419 | 1.09 | 1.66E-01 | transcription_start_site | - | 68168 | 68168 | 931   | 33503 | AN8938 |
| 2758 | CONTIG165 | 68555 | 68919 | 1.09 | 1.66E-01 | transcription_start_site | - | 68168 | 68168 | -569  | 33503 | AN8938 |
| 2758 | CONTIG165 | 68555 | 68919 | 1.09 | 1.66E-01 | transcription_start_site | - | 69893 | 69893 | 1156  | 33502 | AN8938 |
| 1042 | CONTIG165 | 85956 | 86691 | 1.88 | 7.85E-03 | transcription_start_site | - | 82624 | 82624 | -3699 | 33516 | AN8942 |
| 1042 | CONTIG165 | 85956 | 86691 | 1.88 | 7.85E-03 | transcription_start_site | - | 81858 | 81858 | -4465 | 33517 | AN8942 |
| 2482 | CONTIG165 | 82521 | 82785 | 1.21 | 1.08E-01 | transcription_start_site | - | 82624 | 82624 | -29   | 33516 | AN8942 |
| 2482 | CONTIG165 | 82521 | 82785 | 1.21 | 1.08E-01 | transcription_start_site | - | 81858 | 81858 | -795  | 33517 | AN8942 |
| 1042 | CONTIG165 | 85956 | 86691 | 1.88 | 7.85E-03 | transcription_start_site | + | 86719 | 86719 | -395  | 33518 | AN8943 |
| 1042 | CONTIG165 | 85956 | 86691 | 1.88 | 7.85E-03 | transcription_start_site | + | 86951 | 86951 | -627  | 33519 | AN8943 |
| 1042 | CONTIG165 | 85956 | 86691 | 1.88 | 7.85E-03 | transcription_start_site | + | 87136 | 87136 | -812  | 33520 | AN8943 |
| 1042 | CONTIG165 | 85956 | 86691 | 1.88 | 7.85E-03 | transcription_start_site | + | 87602 | 87602 | -1278 | 33521 | AN8943 |

|      |           |        |        |      |          |                          |   |        |        |       |       |        |
|------|-----------|--------|--------|------|----------|--------------------------|---|--------|--------|-------|-------|--------|
| 1042 | CONTIG165 | 85956  | 86691  | 1.88 | 7.85E-03 | transcription_start_site | + | 87728  | 87728  | -1404 | 33522 | AN8943 |
| 2482 | CONTIG165 | 82521  | 82785  | 1.21 | 1.08E-01 | transcription_start_site | + | 86719  | 86719  | -4066 | 33518 | AN8943 |
| 2482 | CONTIG165 | 82521  | 82785  | 1.21 | 1.08E-01 | transcription_start_site | + | 86951  | 86951  | -4298 | 33519 | AN8943 |
| 2482 | CONTIG165 | 82521  | 82785  | 1.21 | 1.08E-01 | transcription_start_site | + | 87136  | 87136  | -4483 | 33520 | AN8943 |
| 2482 | CONTIG165 | 82521  | 82785  | 1.21 | 1.08E-01 | transcription_start_site | + | 87602  | 87602  | -4949 | 33521 | AN8943 |
| 2482 | CONTIG165 | 82521  | 82785  | 1.21 | 1.08E-01 | transcription_start_site | + | 87728  | 87728  | -5075 | 33522 | AN8943 |
| 1042 | CONTIG165 | 85956  | 86691  | 1.88 | 7.85E-03 | transcription_start_site | + | 90026  | 90026  | -3702 | 33523 | AN8944 |
| 1042 | CONTIG165 | 85956  | 86691  | 1.88 | 7.85E-03 | transcription_start_site | + | 90292  | 90292  | -3968 | 33524 | AN8944 |
| 1042 | CONTIG165 | 85956  | 86691  | 1.88 | 7.85E-03 | transcription_start_site | + | 90528  | 90528  | -4204 | 33525 | AN8944 |
| 1042 | CONTIG165 | 85956  | 86691  | 1.88 | 7.85E-03 | transcription_start_site | + | 90896  | 90896  | -4572 | 33526 | AN8944 |
| 1042 | CONTIG165 | 85956  | 86691  | 1.88 | 7.85E-03 | transcription_start_site | + | 91053  | 91053  | -4729 | 33527 | AN8944 |
| 1042 | CONTIG165 | 85956  | 86691  | 1.88 | 7.85E-03 | transcription_start_site | + | 91531  | 91531  | -5207 | 33528 | AN8944 |
| 349  | CONTIG165 | 94355  | 94719  | 2.68 | 0.00E+00 | transcription_start_site | - | 93871  | 93871  | -666  | 33529 | AN8945 |
| 349  | CONTIG165 | 94355  | 94719  | 2.68 | 0.00E+00 | transcription_start_site | - | 93759  | 93759  | -778  | 33530 | AN8945 |
| 349  | CONTIG165 | 94355  | 94719  | 2.68 | 0.00E+00 | transcription_start_site | - | 93659  | 93659  | -878  | 33531 | AN8945 |
| 349  | CONTIG165 | 94355  | 94719  | 2.68 | 0.00E+00 | transcription_start_site | - | 93506  | 93506  | -1031 | 33532 | AN8945 |
| 349  | CONTIG165 | 94355  | 94719  | 2.68 | 0.00E+00 | transcription_start_site | - | 93403  | 93403  | -1134 | 33533 | AN8945 |
| 349  | CONTIG165 | 94355  | 94719  | 2.68 | 0.00E+00 | transcription_start_site | - | 93307  | 93307  | -1230 | 33534 | AN8945 |
| 349  | CONTIG165 | 94355  | 94719  | 2.68 | 0.00E+00 | transcription_start_site | - | 93128  | 93128  | -1409 | 33535 | AN8945 |
| 349  | CONTIG165 | 94355  | 94719  | 2.68 | 0.00E+00 | transcription_start_site | - | 93050  | 93050  | -1487 | 33536 | AN8945 |
| 349  | CONTIG165 | 94355  | 94719  | 2.68 | 0.00E+00 | transcription_start_site | - | 92967  | 92967  | -1570 | 33537 | AN8945 |
| 2467 | CONTIG165 | 96006  | 97625  | 1.21 | 5.82E-02 | transcription_start_site | - | 93871  | 93871  | -2944 | 33529 | AN8945 |
| 2467 | CONTIG165 | 96006  | 97625  | 1.21 | 5.82E-02 | transcription_start_site | - | 93759  | 93759  | -3056 | 33530 | AN8945 |
| 2467 | CONTIG165 | 96006  | 97625  | 1.21 | 5.82E-02 | transcription_start_site | - | 93659  | 93659  | -3156 | 33531 | AN8945 |
| 2467 | CONTIG165 | 96006  | 97625  | 1.21 | 5.82E-02 | transcription_start_site | - | 93506  | 93506  | -3309 | 33532 | AN8945 |
| 2467 | CONTIG165 | 96006  | 97625  | 1.21 | 5.82E-02 | transcription_start_site | - | 93403  | 93403  | -3412 | 33533 | AN8945 |
| 2467 | CONTIG165 | 96006  | 97625  | 1.21 | 5.82E-02 | transcription_start_site | - | 93307  | 93307  | -3508 | 33534 | AN8945 |
| 2467 | CONTIG165 | 96006  | 97625  | 1.21 | 5.82E-02 | transcription_start_site | - | 93128  | 93128  | -3687 | 33535 | AN8945 |
| 2467 | CONTIG165 | 96006  | 97625  | 1.21 | 5.82E-02 | transcription_start_site | - | 93050  | 93050  | -3765 | 33536 | AN8945 |
| 2467 | CONTIG165 | 96006  | 97625  | 1.21 | 5.82E-02 | transcription_start_site | - | 92967  | 92967  | -3848 | 33537 | AN8945 |
| 2478 | CONTIG165 | 102762 | 103176 | 1.21 | 9.26E-02 | transcription_start_site | + | 102917 | 102917 | 52    | 33538 | AN8947 |
| 2478 | CONTIG165 | 102762 | 103176 | 1.21 | 9.26E-02 | transcription_start_site | + | 103455 | 103455 | -486  | 33539 | AN8947 |
| 2478 | CONTIG165 | 102762 | 103176 | 1.21 | 9.26E-02 | transcription_start_site | + | 103837 | 103837 | -868  | 33540 | AN8947 |
| 2478 | CONTIG165 | 102762 | 103176 | 1.21 | 9.26E-02 | transcription_start_site | + | 104689 | 104689 | -1720 | 33541 | AN8947 |
| 2478 | CONTIG165 | 102762 | 103176 | 1.21 | 9.26E-02 | transcription_start_site | + | 104821 | 104821 | -1852 | 33542 | AN8947 |
| 2684 | CONTIG165 | 99171  | 99650  | 1.13 | 1.44E-01 | transcription_start_site | + | 102917 | 102917 | -3506 | 33538 | AN8947 |
| 2684 | CONTIG165 | 99171  | 99650  | 1.13 | 1.44E-01 | transcription_start_site | + | 103455 | 103455 | -4044 | 33539 | AN8947 |
| 2684 | CONTIG165 | 99171  | 99650  | 1.13 | 1.44E-01 | transcription_start_site | + | 103837 | 103837 | -4426 | 33540 | AN8947 |
| 366  | CONTIG166 | 7276   | 7627   | 2.66 | 8.69E-04 | transcription_start_site | + | 7647   | 7647   | -195  | 33563 | AN8953 |
| 366  | CONTIG166 | 7276   | 7627   | 2.66 | 8.69E-04 | transcription_start_site | + | 9649   | 9649   | -2197 | 33564 | AN8953 |
| 366  | CONTIG166 | 7276   | 7627   | 2.66 | 8.69E-04 | transcription_start_site | + | 9842   | 9842   | -2390 | 33565 | AN8953 |
| 366  | CONTIG166 | 7276   | 7627   | 2.66 | 8.69E-04 | transcription_start_site | + | 10034  | 10034  | -2582 | 33566 | AN8953 |
| 366  | CONTIG166 | 7276   | 7627   | 2.66 | 8.69E-04 | transcription_start_site | + | 11740  | 11740  | -4288 | 33567 | AN8954 |
| 366  | CONTIG166 | 7276   | 7627   | 2.66 | 8.69E-04 | transcription_start_site | + | 12331  | 12331  | -4879 | 33568 | AN8954 |
| 366  | CONTIG166 | 7276   | 7627   | 2.66 | 8.69E-04 | transcription_start_site | + | 12435  | 12435  | -4983 | 33569 | AN8954 |
| 505  | CONTIG166 | 21844  | 22633  | 2.43 | 0.00E+00 | transcription_start_site | - | 21774  | 21774  | -464  | 33577 | AN8956 |
| 505  | CONTIG166 | 21844  | 22633  | 2.43 | 0.00E+00 | transcription_start_site | + | 24698  | 24698  | -2459 | 33578 | AN8957 |
| 505  | CONTIG166 | 21844  | 22633  | 2.43 | 0.00E+00 | transcription_start_site | + | 24991  | 24991  | -2752 | 33579 | AN8957 |
| 505  | CONTIG166 | 21844  | 22633  | 2.43 | 0.00E+00 | transcription_start_site | + | 25339  | 25339  | -3100 | 33580 | AN8957 |
| 1062 | CONTIG167 | 1821   | 2099   | 1.86 | 3.70E-02 | transcription_start_site | + | 4739   | 4739   | -2779 | 33594 | AN8964 |
| 1062 | CONTIG167 | 1821   | 2099   | 1.86 | 3.70E-02 | transcription_start_site | + | 5027   | 5027   | -3067 | 33595 | AN8964 |
| 1062 | CONTIG167 | 1821   | 2099   | 1.86 | 3.70E-02 | transcription_start_site | + | 5240   | 5240   | -3280 | 33596 | AN8964 |
| 1062 | CONTIG167 | 1821   | 2099   | 1.86 | 3.70E-02 | transcription_start_site | + | 5409   | 5409   | -3449 | 33597 | AN8964 |
| 1062 | CONTIG167 | 1821   | 2099   | 1.86 | 3.70E-02 | transcription_start_site | + | 5911   | 5911   | -3951 | 33598 | AN8964 |
| 1062 | CONTIG167 | 1821   | 2099   | 1.86 | 3.70E-02 | transcription_start_site | + | 6728   | 6728   | -4768 | 33599 | AN8964 |
| 472  | CONTIG167 | 12082  | 12351  | 2.48 | 4.61E-03 | transcription_start_site | + | 12444  | 12444  | -227  | 33600 | AN8966 |
| 472  | CONTIG167 | 12082  | 12351  | 2.48 | 4.61E-03 | transcription_start_site | + | 14084  | 14084  | -1867 | 33601 | AN8966 |

|      |           |       |       |      |          |                          |   |       |       |       |       |        |
|------|-----------|-------|-------|------|----------|--------------------------|---|-------|-------|-------|-------|--------|
| 472  | CONTIG167 | 12082 | 12351 | 2.48 | 4.61E-03 | transcription_start_site | + | 14525 | 14525 | -2308 | 33602 | AN8966 |
| 472  | CONTIG167 | 12082 | 12351 | 2.48 | 4.61E-03 | transcription_start_site | + | 17209 | 17209 | -4992 | 33603 | AN8967 |
| 196  | CONTIG167 | 25051 | 25350 | 2.95 | 8.69E-04 | transcription_start_site | - | 20798 | 20798 | -4402 | 33607 | AN8969 |
| 196  | CONTIG167 | 25051 | 25350 | 2.95 | 8.69E-04 | transcription_start_site | - | 20608 | 20608 | -4592 | 33608 | AN8969 |
| 196  | CONTIG167 | 25051 | 25350 | 2.95 | 8.69E-04 | transcription_start_site | - | 22822 | 22822 | -2378 | 33609 | AN8970 |
| 196  | CONTIG167 | 25051 | 25350 | 2.95 | 8.69E-04 | transcription_start_site | - | 22720 | 22720 | -2480 | 33610 | AN8970 |
| 196  | CONTIG167 | 25051 | 25350 | 2.95 | 8.69E-04 | transcription_start_site | - | 24746 | 24746 | -454  | 33611 | AN8971 |
| 196  | CONTIG167 | 25051 | 25350 | 2.95 | 8.69E-04 | transcription_start_site | - | 24128 | 24128 | -1072 | 33612 | AN8971 |
| 196  | CONTIG167 | 25051 | 25350 | 2.95 | 8.69E-04 | transcription_start_site | - | 23942 | 23942 | -1258 | 33613 | AN8971 |
| 196  | CONTIG167 | 25051 | 25350 | 2.95 | 8.69E-04 | transcription_start_site | - | 23253 | 23253 | -1947 | 33614 | AN8971 |
| 1063 | CONTIG167 | 28596 | 29015 | 1.86 | 3.70E-02 | transcription_start_site | - | 24746 | 24746 | -4059 | 33611 | AN8971 |
| 1063 | CONTIG167 | 28596 | 29015 | 1.86 | 3.70E-02 | transcription_start_site | - | 24128 | 24128 | -4677 | 33612 | AN8971 |
| 1063 | CONTIG167 | 28596 | 29015 | 1.86 | 3.70E-02 | transcription_start_site | - | 23942 | 23942 | -4863 | 33613 | AN8971 |
| 554  | CONTIG167 | 32421 | 32750 | 2.38 | 2.49E-03 | transcription_start_site | - | 32242 | 32242 | -343  | 33616 | AN8972 |
| 554  | CONTIG167 | 32421 | 32750 | 2.38 | 2.49E-03 | transcription_start_site | - | 33027 | 33027 | 441   | 33615 | AN8972 |
| 554  | CONTIG167 | 32421 | 32750 | 2.38 | 2.49E-03 | transcription_start_site | - | 31789 | 31789 | -796  | 33617 | AN8972 |
| 554  | CONTIG167 | 32421 | 32750 | 2.38 | 2.49E-03 | transcription_start_site | - | 31256 | 31256 | -1329 | 33618 | AN8972 |
| 554  | CONTIG167 | 32421 | 32750 | 2.38 | 2.49E-03 | transcription_start_site | - | 30846 | 30846 | -1739 | 33619 | AN8972 |
| 554  | CONTIG167 | 32421 | 32750 | 2.38 | 2.49E-03 | transcription_start_site | - | 30648 | 30648 | -1937 | 33620 | AN8972 |
| 554  | CONTIG167 | 32421 | 32750 | 2.38 | 2.49E-03 | transcription_start_site | - | 30277 | 30277 | -2308 | 33621 | AN8972 |
| 554  | CONTIG167 | 32421 | 32750 | 2.38 | 2.49E-03 | transcription_start_site | + | 34484 | 34484 | -1898 | 33622 | AN8973 |
| 554  | CONTIG167 | 32421 | 32750 | 2.38 | 2.49E-03 | transcription_start_site | + | 34768 | 34768 | -2182 | 33623 | AN8973 |
| 554  | CONTIG167 | 32421 | 32750 | 2.38 | 2.49E-03 | transcription_start_site | + | 37082 | 37082 | -4496 | 33624 | AN8974 |
| 554  | CONTIG167 | 32421 | 32750 | 2.38 | 2.49E-03 | transcription_start_site | + | 37231 | 37231 | -4645 | 33625 | AN8974 |
| 1704 | CONTIG167 | 40521 | 40803 | 1.5  | 1.08E-01 | transcription_start_site | - | 40722 | 40722 | 60    | 33628 | AN8975 |
| 698  | CONTIG168 | 6451  | 6875  | 2.19 | 0.00E+00 | transcription_start_site | - | 2641  | 2641  | -4022 | 33634 | AN8977 |
| 698  | CONTIG168 | 6451  | 6875  | 2.19 | 0.00E+00 | transcription_start_site | - | 1833  | 1833  | -4830 | 33635 | AN8977 |
| 698  | CONTIG168 | 6451  | 6875  | 2.19 | 0.00E+00 | transcription_start_site | - | 6565  | 6565  | -98   | 33636 | AN8978 |
| 698  | CONTIG168 | 6451  | 6875  | 2.19 | 0.00E+00 | transcription_start_site | - | 6285  | 6285  | -378  | 33637 | AN8978 |
| 1937 | CONTIG168 | 25883 | 26232 | 1.39 | 5.88E-02 | transcription_start_site | - | 23804 | 23804 | -2253 | 33667 | AN8985 |
| 1937 | CONTIG168 | 25883 | 26232 | 1.39 | 5.88E-02 | transcription_start_site | - | 22679 | 22679 | -3378 | 33668 | AN8985 |
| 1937 | CONTIG168 | 25883 | 26232 | 1.39 | 5.88E-02 | transcription_start_site | - | 22574 | 22574 | -3483 | 33669 | AN8985 |
| 1937 | CONTIG168 | 25883 | 26232 | 1.39 | 5.88E-02 | transcription_start_site | - | 25617 | 25617 | -440  | 33670 | AN8986 |
| 1937 | CONTIG168 | 25883 | 26232 | 1.39 | 5.88E-02 | transcription_start_site | - | 25148 | 25148 | -909  | 33671 | AN8986 |
| 1937 | CONTIG168 | 25883 | 26232 | 1.39 | 5.88E-02 | transcription_start_site | + | 28841 | 28841 | -2783 | 33672 | AN8987 |
| 1937 | CONTIG168 | 25883 | 26232 | 1.39 | 5.88E-02 | transcription_start_site | + | 29771 | 29771 | -3713 | 33673 | AN8987 |
| 1937 | CONTIG168 | 25883 | 26232 | 1.39 | 5.88E-02 | transcription_start_site | + | 30305 | 30305 | -4247 | 33674 | AN8987 |
| 1937 | CONTIG168 | 25883 | 26232 | 1.39 | 5.88E-02 | transcription_start_site | + | 30468 | 30468 | -4410 | 33675 | AN8987 |
| 1937 | CONTIG168 | 25883 | 26232 | 1.39 | 5.88E-02 | transcription_start_site | + | 30787 | 30787 | -4729 | 33676 | AN8988 |
| 1937 | CONTIG168 | 25883 | 26232 | 1.39 | 5.88E-02 | transcription_start_site | + | 31063 | 31063 | -5005 | 33677 | AN8988 |
| 61   | CONTIG168 | 33693 | 34342 | 3.37 | 0.00E+00 | transcription_start_site | + | 32975 | 32975 | 1042  | 33681 | AN8989 |
| 61   | CONTIG168 | 33693 | 34342 | 3.37 | 0.00E+00 | transcription_start_site | + | 32729 | 32729 | 1288  | 33680 | AN8989 |
| 61   | CONTIG168 | 33693 | 34342 | 3.37 | 0.00E+00 | transcription_start_site | + | 34257 | 34257 | -239  | 33682 | AN8990 |
| 61   | CONTIG168 | 33693 | 34342 | 3.37 | 0.00E+00 | transcription_start_site | + | 34938 | 34938 | -920  | 33683 | AN8990 |
| 61   | CONTIG168 | 33693 | 34342 | 3.37 | 0.00E+00 | transcription_start_site | + | 35200 | 35200 | -1182 | 33684 | AN8990 |
| 61   | CONTIG168 | 33693 | 34342 | 3.37 | 0.00E+00 | transcription_start_site | + | 35829 | 35829 | -1811 | 33685 | AN8990 |
| 2182 | CONTIG168 | 35178 | 35467 | 1.3  | 8.01E-02 | transcription_start_site | + | 35200 | 35200 | 122   | 33684 | AN8990 |
| 2182 | CONTIG168 | 35178 | 35467 | 1.3  | 8.01E-02 | transcription_start_site | + | 34938 | 34938 | 384   | 33683 | AN8990 |
| 2182 | CONTIG168 | 35178 | 35467 | 1.3  | 8.01E-02 | transcription_start_site | + | 35829 | 35829 | -506  | 33685 | AN8990 |
| 2182 | CONTIG168 | 35178 | 35467 | 1.3  | 8.01E-02 | transcription_start_site | + | 34257 | 34257 | 1065  | 33682 | AN8990 |
| 2755 | CONTIG168 | 43278 | 43702 | 1.09 | 1.50E-01 | transcription_start_site | - | 39791 | 39791 | -3699 | 33690 | AN8992 |
| 2755 | CONTIG168 | 43278 | 43702 | 1.09 | 1.50E-01 | transcription_start_site | - | 38817 | 38817 | -4673 | 33691 | AN8992 |
| 2755 | CONTIG168 | 43278 | 43702 | 1.09 | 1.50E-01 | transcription_start_site | - | 38652 | 38652 | -4838 | 33692 | AN8992 |
| 2755 | CONTIG168 | 43278 | 43702 | 1.09 | 1.50E-01 | transcription_start_site | - | 44110 | 44110 | 620   | 33693 | AN8993 |
| 2755 | CONTIG168 | 43278 | 43702 | 1.09 | 1.50E-01 | transcription_start_site | - | 42311 | 42311 | -1179 | 33694 | AN8993 |
| 2755 | CONTIG168 | 43278 | 43702 | 1.09 | 1.50E-01 | transcription_start_site | - | 41933 | 41933 | -1557 | 33695 | AN8993 |
| 2755 | CONTIG168 | 43278 | 43702 | 1.09 | 1.50E-01 | transcription_start_site | - | 41785 | 41785 | -1705 | 33696 | AN8993 |

|      |           |        |        |      |          |                          |   |        |        |       |       |        |
|------|-----------|--------|--------|------|----------|--------------------------|---|--------|--------|-------|-------|--------|
| 2755 | CONTIG168 | 43278  | 43702  | 1.09 | 1.50E-01 | transcription_start_site | - | 41692  | 41692  | -1798 | 33697 | AN8993 |
| 2755 | CONTIG168 | 43278  | 43702  | 1.09 | 1.50E-01 | transcription_start_site | + | 45698  | 45698  | -2208 | 33698 | AN8994 |
| 2755 | CONTIG168 | 43278  | 43702  | 1.09 | 1.50E-01 | transcription_start_site | + | 46268  | 46268  | -2778 | 33699 | AN8994 |
| 1478 | CONTIG168 | 65029  | 65303  | 1.6  | 2.62E-02 | transcription_start_site | - | 60152  | 60152  | -5014 | 33713 | AN8999 |
| 2663 | CONTIG168 | 64054  | 64558  | 1.14 | 1.44E-01 | transcription_start_site | - | 60152  | 60152  | -4154 | 33713 | AN8999 |
| 2663 | CONTIG168 | 64054  | 64558  | 1.14 | 1.44E-01 | transcription_start_site | - | 59105  | 59105  | -5201 | 33714 | AN8999 |
| 1478 | CONTIG168 | 65029  | 65303  | 1.6  | 2.62E-02 | transcription_start_site | - | 64935  | 64935  | -231  | 33723 | AN9000 |
| 1478 | CONTIG168 | 65029  | 65303  | 1.6  | 2.62E-02 | transcription_start_site | - | 64616  | 64616  | -550  | 33724 | AN9000 |
| 1478 | CONTIG168 | 65029  | 65303  | 1.6  | 2.62E-02 | transcription_start_site | - | 64290  | 64290  | -876  | 33725 | AN9000 |
| 1478 | CONTIG168 | 65029  | 65303  | 1.6  | 2.62E-02 | transcription_start_site | - | 64010  | 64010  | -1156 | 33726 | AN9000 |
| 2663 | CONTIG168 | 64054  | 64558  | 1.14 | 1.44E-01 | transcription_start_site | - | 64290  | 64290  | -16   | 33725 | AN9000 |
| 2663 | CONTIG168 | 64054  | 64558  | 1.14 | 1.44E-01 | transcription_start_site | - | 64010  | 64010  | -296  | 33726 | AN9000 |
| 2663 | CONTIG168 | 64054  | 64558  | 1.14 | 1.44E-01 | transcription_start_site | - | 64616  | 64616  | 310   | 33724 | AN9000 |
| 2663 | CONTIG168 | 64054  | 64558  | 1.14 | 1.44E-01 | transcription_start_site | - | 64935  | 64935  | 629   | 33723 | AN9000 |
| 2565 | CONTIG168 | 71642  | 72216  | 1.18 | 1.25E-01 | transcription_start_site | - | 67014  | 67014  | -4915 | 33727 | AN9001 |
| 2565 | CONTIG168 | 71642  | 72216  | 1.18 | 1.25E-01 | transcription_start_site | - | 66746  | 66746  | -5183 | 33728 | AN9001 |
| 2565 | CONTIG168 | 71642  | 72216  | 1.18 | 1.25E-01 | transcription_start_site | + | 72075  | 72075  | -146  | 33733 | AN9002 |
| 2565 | CONTIG168 | 71642  | 72216  | 1.18 | 1.25E-01 | transcription_start_site | + | 72320  | 72320  | -391  | 33734 | AN9002 |
| 2565 | CONTIG168 | 71642  | 72216  | 1.18 | 1.25E-01 | transcription_start_site | + | 71495  | 71495  | 434   | 33732 | AN9002 |
| 2565 | CONTIG168 | 71642  | 72216  | 1.18 | 1.25E-01 | transcription_start_site | + | 71311  | 71311  | 618   | 33731 | AN9002 |
| 2565 | CONTIG168 | 71642  | 72216  | 1.18 | 1.25E-01 | transcription_start_site | + | 71183  | 71183  | 746   | 33730 | AN9002 |
| 2565 | CONTIG168 | 71642  | 72216  | 1.18 | 1.25E-01 | transcription_start_site | - | 72538  | 72538  | 609   | 33736 | AN9003 |
| 451  | CONTIG168 | 95345  | 95689  | 2.52 | 2.16E-04 | transcription_start_site | - | 93185  | 93185  | -2332 | 33759 | AN9007 |
| 451  | CONTIG168 | 95345  | 95689  | 2.52 | 2.16E-04 | transcription_start_site | - | 93028  | 93028  | -2489 | 33760 | AN9007 |
| 451  | CONTIG168 | 95345  | 95689  | 2.52 | 2.16E-04 | transcription_start_site | - | 92371  | 92371  | -3146 | 33761 | AN9007 |
| 451  | CONTIG168 | 95345  | 95689  | 2.52 | 2.16E-04 | transcription_start_site | + | 95776  | 95776  | -259  | 33762 | AN9008 |
| 451  | CONTIG168 | 95345  | 95689  | 2.52 | 2.16E-04 | transcription_start_site | + | 99381  | 99381  | -3864 | 33763 | AN9008 |
| 217  | CONTIG168 | 121218 | 121575 | 2.9  | 0.00E+00 | transcription_start_site | + | 120251 | 120251 | 1145  | 33798 | AN9017 |
| 217  | CONTIG168 | 121218 | 121575 | 2.9  | 0.00E+00 | transcription_start_site | - | 121231 | 121231 | -165  | 33799 | AN9018 |
| 217  | CONTIG168 | 121218 | 121575 | 2.9  | 0.00E+00 | transcription_start_site | - | 120630 | 120630 | -766  | 33800 | AN9018 |
| 2323 | CONTIG168 | 125119 | 125533 | 1.26 | 9.24E-02 | transcription_start_site | - | 121231 | 121231 | -4095 | 33799 | AN9018 |
| 2323 | CONTIG168 | 125119 | 125533 | 1.26 | 9.24E-02 | transcription_start_site | - | 120630 | 120630 | -4696 | 33800 | AN9018 |
| 217  | CONTIG168 | 121218 | 121575 | 2.9  | 0.00E+00 | transcription_start_site | - | 121952 | 121952 | 555   | 33803 | AN9019 |
| 217  | CONTIG168 | 121218 | 121575 | 2.9  | 0.00E+00 | transcription_start_site | - | 122124 | 122124 | 727   | 33802 | AN9019 |
| 2323 | CONTIG168 | 125119 | 125533 | 1.26 | 9.24E-02 | transcription_start_site | - | 122943 | 122943 | -2383 | 33801 | AN9019 |
| 2323 | CONTIG168 | 125119 | 125533 | 1.26 | 9.24E-02 | transcription_start_site | - | 122124 | 122124 | -3202 | 33802 | AN9019 |
| 2323 | CONTIG168 | 125119 | 125533 | 1.26 | 9.24E-02 | transcription_start_site | - | 121952 | 121952 | -3374 | 33803 | AN9019 |
| 2323 | CONTIG168 | 125119 | 125533 | 1.26 | 9.24E-02 | transcription_start_site | - | 124968 | 124968 | -358  | 33804 | AN9020 |
| 2323 | CONTIG168 | 125119 | 125533 | 1.26 | 9.24E-02 | transcription_start_site | + | 129815 | 129815 | -4489 | 33808 | AN9022 |
| 2323 | CONTIG168 | 125119 | 125533 | 1.26 | 9.24E-02 | transcription_start_site | + | 129908 | 129908 | -4582 | 33809 | AN9022 |
| 2323 | CONTIG168 | 125119 | 125533 | 1.26 | 9.24E-02 | transcription_start_site | + | 130145 | 130145 | -4819 | 33810 | AN9022 |
| 925  | CONTIG168 | 133959 | 134453 | 1.98 | 5.20E-03 | transcription_start_site | - | 132670 | 132670 | -1536 | 33811 | AN9023 |
| 925  | CONTIG168 | 133959 | 134453 | 1.98 | 5.20E-03 | transcription_start_site | - | 132040 | 132040 | -2166 | 33812 | AN9023 |
| 925  | CONTIG168 | 133959 | 134453 | 1.98 | 5.20E-03 | transcription_start_site | - | 131693 | 131693 | -2513 | 33813 | AN9023 |
| 925  | CONTIG168 | 133959 | 134453 | 1.98 | 5.20E-03 | transcription_start_site | - | 131231 | 131231 | -2975 | 33814 | AN9023 |
| 925  | CONTIG168 | 133959 | 134453 | 1.98 | 5.20E-03 | transcription_start_site | - | 131136 | 131136 | -3070 | 33815 | AN9023 |
| 925  | CONTIG168 | 133959 | 134453 | 1.98 | 5.20E-03 | transcription_start_site | - | 130885 | 130885 | -3321 | 33816 | AN9023 |
| 925  | CONTIG168 | 133959 | 134453 | 1.98 | 5.20E-03 | transcription_start_site | + | 133635 | 133635 | 571   | 33819 | AN9024 |
| 925  | CONTIG168 | 133959 | 134453 | 1.98 | 5.20E-03 | transcription_start_site | + | 133148 | 133148 | 1058  | 33818 | AN9024 |
| 925  | CONTIG168 | 133959 | 134453 | 1.98 | 5.20E-03 | transcription_start_site | + | 138272 | 138272 | -4066 | 33820 | AN9025 |
| 925  | CONTIG168 | 133959 | 134453 | 1.98 | 5.20E-03 | transcription_start_site | + | 138679 | 138679 | -4473 | 33821 | AN9025 |
| 2664 | CONTIG168 | 138309 | 138733 | 1.14 | 1.44E-01 | transcription_start_site | + | 138679 | 138679 | -158  | 33821 | AN9025 |
| 2664 | CONTIG168 | 138309 | 138733 | 1.14 | 1.44E-01 | transcription_start_site | + | 138272 | 138272 | 249   | 33820 | AN9025 |
| 2183 | CONTIG168 | 172954 | 173393 | 1.3  | 8.01E-02 | transcription_start_site | - | 173214 | 173214 | 40    | 33861 | AN9037 |
| 2183 | CONTIG168 | 172954 | 173393 | 1.3  | 8.01E-02 | transcription_start_site | - | 173382 | 173382 | 208   | 33860 | AN9037 |
| 2183 | CONTIG168 | 172954 | 173393 | 1.3  | 8.01E-02 | transcription_start_site | - | 173572 | 173572 | 398   | 33859 | AN9037 |
| 2183 | CONTIG168 | 172954 | 173393 | 1.3  | 8.01E-02 | transcription_start_site | - | 171113 | 171113 | -2060 | 33862 | AN9037 |

|      |           |        |        |      |          |                          |   |        |        |       |       |        |
|------|-----------|--------|--------|------|----------|--------------------------|---|--------|--------|-------|-------|--------|
| 2759 | CONTIG168 | 171834 | 172328 | 1.09 | 1.66E-01 | transcription_start_site | - | 171113 | 171113 | -968  | 33862 | AN9037 |
| 2759 | CONTIG168 | 171834 | 172328 | 1.09 | 1.66E-01 | transcription_start_site | - | 173214 | 173214 | 1133  | 33861 | AN9037 |
| 2183 | CONTIG168 | 172954 | 173393 | 1.3  | 8.01E-02 | transcription_start_site | + | 173773 | 173773 | -599  | 33863 | AN9038 |
| 2759 | CONTIG168 | 171834 | 172328 | 1.09 | 1.66E-01 | transcription_start_site | + | 173773 | 173773 | -1692 | 33863 | AN9038 |
| 93   | CONTIG168 | 197855 | 198219 | 3.24 | 0.00E+00 | transcription_start_site | - | 194282 | 194282 | -3755 | 33881 | AN9046 |
| 93   | CONTIG168 | 197855 | 198219 | 3.24 | 0.00E+00 | transcription_start_site | - | 193788 | 193788 | -4249 | 33882 | AN9046 |
| 93   | CONTIG168 | 197855 | 198219 | 3.24 | 0.00E+00 | transcription_start_site | - | 193655 | 193655 | -4382 | 33883 | AN9046 |
| 93   | CONTIG168 | 197855 | 198219 | 3.24 | 0.00E+00 | transcription_start_site | - | 193484 | 193484 | -4553 | 33884 | AN9046 |
| 93   | CONTIG168 | 197855 | 198219 | 3.24 | 0.00E+00 | transcription_start_site | - | 193297 | 193297 | -4740 | 33885 | AN9046 |
| 93   | CONTIG168 | 197855 | 198219 | 3.24 | 0.00E+00 | transcription_start_site | - | 192919 | 192919 | -5118 | 33886 | AN9046 |
| 93   | CONTIG168 | 197855 | 198219 | 3.24 | 0.00E+00 | transcription_start_site | + | 197156 | 197156 | 881   | 33892 | AN9047 |
| 93   | CONTIG168 | 197855 | 198219 | 3.24 | 0.00E+00 | transcription_start_site | + | 198068 | 198068 | -31   | 33893 | AN9048 |
| 93   | CONTIG168 | 197855 | 198219 | 3.24 | 0.00E+00 | transcription_start_site | + | 198306 | 198306 | -269  | 33894 | AN9048 |
| 93   | CONTIG168 | 197855 | 198219 | 3.24 | 0.00E+00 | transcription_start_site | + | 198498 | 198498 | -461  | 33895 | AN9048 |
| 93   | CONTIG168 | 197855 | 198219 | 3.24 | 0.00E+00 | transcription_start_site | + | 199671 | 199671 | -1634 | 33896 | AN9048 |
| 93   | CONTIG168 | 197855 | 198219 | 3.24 | 0.00E+00 | transcription_start_site | + | 200354 | 200354 | -2317 | 33897 | AN9048 |
| 93   | CONTIG168 | 197855 | 198219 | 3.24 | 0.00E+00 | transcription_start_site | + | 200665 | 200665 | -2628 | 33898 | AN9048 |
| 93   | CONTIG168 | 197855 | 198219 | 3.24 | 0.00E+00 | transcription_start_site | + | 201420 | 201420 | -3383 | 33899 | AN9048 |
| 93   | CONTIG168 | 197855 | 198219 | 3.24 | 0.00E+00 | transcription_start_site | + | 201670 | 201670 | -3633 | 33900 | AN9048 |
| 93   | CONTIG168 | 197855 | 198219 | 3.24 | 0.00E+00 | transcription_start_site | + | 201838 | 201838 | -3801 | 33901 | AN9048 |
| 93   | CONTIG168 | 197855 | 198219 | 3.24 | 0.00E+00 | transcription_start_site | + | 202302 | 202302 | -4265 | 33902 | AN9049 |
| 93   | CONTIG168 | 197855 | 198219 | 3.24 | 0.00E+00 | transcription_start_site | + | 202438 | 202438 | -4401 | 33903 | AN9049 |
| 2836 | CONTIG168 | 204905 | 205269 | 1.05 | 1.93E-01 | transcription_start_site | - | 205338 | 205338 | 251   | 33904 | AN9050 |
| 2836 | CONTIG168 | 204905 | 205269 | 1.05 | 1.93E-01 | transcription_start_site | + | 205842 | 205842 | -755  | 33905 | AN9051 |
| 2836 | CONTIG168 | 204905 | 205269 | 1.05 | 1.93E-01 | transcription_start_site | + | 206920 | 206920 | -1833 | 33906 | AN9051 |
| 1172 | CONTIG169 | 41265  | 41604  | 1.78 | 1.30E-02 | transcription_start_site | - | 39971  | 39971  | -1463 | 33961 | AN9069 |
| 1172 | CONTIG169 | 41265  | 41604  | 1.78 | 1.30E-02 | transcription_start_site | - | 39885  | 39885  | -1549 | 33962 | AN9069 |
| 1172 | CONTIG169 | 41265  | 41604  | 1.78 | 1.30E-02 | transcription_start_site | - | 38964  | 38964  | -2470 | 33963 | AN9069 |
| 1172 | CONTIG169 | 41265  | 41604  | 1.78 | 1.30E-02 | transcription_start_site | - | 38758  | 38758  | -2676 | 33964 | AN9069 |
| 1172 | CONTIG169 | 41265  | 41604  | 1.78 | 1.30E-02 | transcription_start_site | - | 38472  | 38472  | -2962 | 33965 | AN9069 |
| 110  | CONTIG169 | 52585  | 53154  | 3.17 | 0.00E+00 | transcription_start_site | + | 51705  | 51705  | 1164  | 33972 | AN9072 |
| 110  | CONTIG169 | 52585  | 53154  | 3.17 | 0.00E+00 | transcription_start_site | - | 52799  | 52799  | -70   | 33973 | AN9073 |
| 1635 | CONTIG169 | 56265  | 56694  | 1.52 | 3.70E-02 | transcription_start_site | - | 52799  | 52799  | -3680 | 33973 | AN9073 |
| 110  | CONTIG169 | 52585  | 53154  | 3.17 | 0.00E+00 | transcription_start_site | - | 53685  | 53685  | 815   | 33975 | AN9074 |
| 1635 | CONTIG169 | 56265  | 56694  | 1.52 | 3.70E-02 | transcription_start_site | - | 54718  | 54718  | -1761 | 33974 | AN9074 |
| 1635 | CONTIG169 | 56265  | 56694  | 1.52 | 3.70E-02 | transcription_start_site | - | 53685  | 53685  | -2794 | 33975 | AN9074 |
| 1635 | CONTIG169 | 56265  | 56694  | 1.52 | 3.70E-02 | transcription_start_site | - | 57031  | 57031  | 551   | 33977 | AN9075 |
| 1635 | CONTIG169 | 56265  | 56694  | 1.52 | 3.70E-02 | transcription_start_site | - | 57129  | 57129  | 649   | 33976 | AN9075 |
| 2408 | CONTIG169 | 84096  | 84425  | 1.23 | 1.08E-01 | transcription_start_site | - | 79698  | 79698  | -4562 | 33992 | AN9081 |
| 2408 | CONTIG169 | 84096  | 84425  | 1.23 | 1.08E-01 | transcription_start_site | - | 79575  | 79575  | -4685 | 33993 | AN9081 |
| 2408 | CONTIG169 | 84096  | 84425  | 1.23 | 1.08E-01 | transcription_start_site | - | 81876  | 81876  | -2384 | 33996 | AN9082 |
| 2408 | CONTIG169 | 84096  | 84425  | 1.23 | 1.08E-01 | transcription_start_site | - | 81546  | 81546  | -2714 | 33997 | AN9082 |
| 2408 | CONTIG169 | 84096  | 84425  | 1.23 | 1.08E-01 | transcription_start_site | + | 84210  | 84210  | 50    | 33998 | AN9083 |
| 2408 | CONTIG169 | 84096  | 84425  | 1.23 | 1.08E-01 | transcription_start_site | + | 84753  | 84753  | -492  | 33999 | AN9083 |
| 1114 | CONTIG169 | 98706  | 98988  | 1.82 | 1.11E-02 | transcription_start_site | + | 98983  | 98983  | -136  | 34012 | AN9087 |
| 1114 | CONTIG169 | 98706  | 98988  | 1.82 | 1.11E-02 | transcription_start_site | + | 99300  | 99300  | -453  | 34013 | AN9087 |
| 2285 | CONTIG169 | 106966 | 107310 | 1.27 | 9.24E-02 | transcription_start_site | - | 102035 | 102035 | -5103 | 34014 | AN9088 |
| 67   | CONTIG169 | 110271 | 110846 | 3.34 | 0.00E+00 | transcription_start_site | - | 105336 | 105336 | -5222 | 34018 | AN9089 |
| 2285 | CONTIG169 | 106966 | 107310 | 1.27 | 9.24E-02 | transcription_start_site | - | 105336 | 105336 | -1802 | 34018 | AN9089 |
| 2285 | CONTIG169 | 106966 | 107310 | 1.27 | 9.24E-02 | transcription_start_site | - | 105037 | 105037 | -2101 | 34019 | AN9089 |
| 2285 | CONTIG169 | 106966 | 107310 | 1.27 | 9.24E-02 | transcription_start_site | - | 104964 | 104964 | -2174 | 34020 | AN9089 |
| 2285 | CONTIG169 | 106966 | 107310 | 1.27 | 9.24E-02 | transcription_start_site | - | 104836 | 104836 | -2302 | 34021 | AN9089 |
| 2285 | CONTIG169 | 106966 | 107310 | 1.27 | 9.24E-02 | transcription_start_site | - | 104751 | 104751 | -2387 | 34022 | AN9089 |
| 2285 | CONTIG169 | 106966 | 107310 | 1.27 | 9.24E-02 | transcription_start_site | - | 104496 | 104496 | -2642 | 34023 | AN9089 |
| 67   | CONTIG169 | 110271 | 110846 | 3.34 | 0.00E+00 | transcription_start_site | - | 108190 | 108190 | -2368 | 34024 | AN9090 |
| 67   | CONTIG169 | 110271 | 110846 | 3.34 | 0.00E+00 | transcription_start_site | - | 107899 | 107899 | -2659 | 34025 | AN9090 |
| 67   | CONTIG169 | 110271 | 110846 | 3.34 | 0.00E+00 | transcription_start_site | - | 107739 | 107739 | -2819 | 34026 | AN9090 |

|      |           |        |        |      |          |                          |   |        |        |       |       |        |
|------|-----------|--------|--------|------|----------|--------------------------|---|--------|--------|-------|-------|--------|
| 2285 | CONTIG169 | 106966 | 107310 | 1.27 | 9.24E-02 | transcription_start_site | - | 107739 | 107739 | 601   | 34026 | AN9090 |
| 2285 | CONTIG169 | 106966 | 107310 | 1.27 | 9.24E-02 | transcription_start_site | - | 107899 | 107899 | 761   | 34025 | AN9090 |
| 2285 | CONTIG169 | 106966 | 107310 | 1.27 | 9.24E-02 | transcription_start_site | - | 108190 | 108190 | 1052  | 34024 | AN9090 |
| 387  | CONTIG169 | 142438 | 142927 | 2.62 | 2.67E-04 | transcription_start_site | - | 141980 | 141980 | -702  | 34065 | AN9100 |
| 387  | CONTIG169 | 142438 | 142927 | 2.62 | 2.67E-04 | transcription_start_site | - | 141506 | 141506 | -1176 | 34066 | AN9100 |
| 2286 | CONTIG169 | 145368 | 145707 | 1.27 | 9.24E-02 | transcription_start_site | - | 141980 | 141980 | -3557 | 34065 | AN9100 |
| 2286 | CONTIG169 | 145368 | 145707 | 1.27 | 9.24E-02 | transcription_start_site | - | 141506 | 141506 | -4031 | 34066 | AN9100 |
| 2286 | CONTIG169 | 145368 | 145707 | 1.27 | 9.24E-02 | transcription_start_site | - | 144726 | 144726 | -811  | 34067 | AN9101 |
| 2286 | CONTIG169 | 145368 | 145707 | 1.27 | 9.24E-02 | transcription_start_site | - | 144614 | 144614 | -923  | 34068 | AN9101 |
| 2286 | CONTIG169 | 145368 | 145707 | 1.27 | 9.24E-02 | transcription_start_site | - | 144047 | 144047 | -1490 | 34069 | AN9101 |
| 387  | CONTIG169 | 142438 | 142927 | 2.62 | 2.67E-04 | transcription_start_site | + | 144995 | 144995 | -2312 | 34070 | AN9102 |
| 2286 | CONTIG169 | 145368 | 145707 | 1.27 | 9.24E-02 | transcription_start_site | + | 144995 | 144995 | 542   | 34070 | AN9102 |
| 1451 | CONTIG169 | 169445 | 169714 | 1.61 | 2.62E-02 | transcription_start_site | - | 168529 | 168529 | -1050 | 34099 | AN9109 |
| 1451 | CONTIG169 | 169445 | 169714 | 1.61 | 2.62E-02 | transcription_start_site | - | 166172 | 166172 | -3407 | 34100 | AN9109 |
| 1451 | CONTIG169 | 169445 | 169714 | 1.61 | 2.62E-02 | transcription_start_site | - | 165619 | 165619 | -3960 | 34101 | AN9109 |
| 2282 | CONTIG169 | 173180 | 174436 | 1.27 | 7.02E-02 | transcription_start_site | - | 168529 | 168529 | -5279 | 34099 | AN9109 |
| 2282 | CONTIG169 | 173180 | 174436 | 1.27 | 7.02E-02 | transcription_start_site | - | 172864 | 172864 | -944  | 34102 | AN9111 |
| 2282 | CONTIG169 | 173180 | 174436 | 1.27 | 7.02E-02 | transcription_start_site | - | 172654 | 172654 | -1154 | 34103 | AN9111 |
| 2282 | CONTIG169 | 173180 | 174436 | 1.27 | 7.02E-02 | transcription_start_site | + | 176576 | 176576 | -2768 | 34104 | AN9113 |
| 2282 | CONTIG169 | 173180 | 174436 | 1.27 | 7.02E-02 | transcription_start_site | + | 176642 | 176642 | -2834 | 34105 | AN9113 |
| 2282 | CONTIG169 | 173180 | 174436 | 1.27 | 7.02E-02 | transcription_start_site | + | 176814 | 176814 | -3006 | 34106 | AN9113 |
| 2282 | CONTIG169 | 173180 | 174436 | 1.27 | 7.02E-02 | transcription_start_site | + | 176993 | 176993 | -3185 | 34107 | AN9113 |
| 2282 | CONTIG169 | 173180 | 174436 | 1.27 | 7.02E-02 | transcription_start_site | + | 177158 | 177158 | -3350 | 34108 | AN9113 |
| 2282 | CONTIG169 | 173180 | 174436 | 1.27 | 7.02E-02 | transcription_start_site | + | 177327 | 177327 | -3519 | 34109 | AN9113 |
| 2665 | CONTIG169 | 202728 | 203152 | 1.14 | 1.44E-01 | transcription_start_site | - | 203034 | 203034 | 94    | 34154 | AN9124 |
| 2665 | CONTIG169 | 202728 | 203152 | 1.14 | 1.44E-01 | transcription_start_site | - | 203277 | 203277 | 337   | 34153 | AN9124 |
| 2665 | CONTIG169 | 202728 | 203152 | 1.14 | 1.44E-01 | transcription_start_site | - | 203397 | 203397 | 457   | 34152 | AN9124 |
| 2665 | CONTIG169 | 202728 | 203152 | 1.14 | 1.44E-01 | transcription_start_site | - | 201668 | 201668 | -1272 | 34155 | AN9124 |
| 2747 | CONTIG169 | 205653 | 206012 | 1.1  | 1.66E-01 | transcription_start_site | - | 203397 | 203397 | -2435 | 34152 | AN9124 |
| 2747 | CONTIG169 | 205653 | 206012 | 1.1  | 1.66E-01 | transcription_start_site | - | 203277 | 203277 | -2555 | 34153 | AN9124 |
| 2747 | CONTIG169 | 205653 | 206012 | 1.1  | 1.66E-01 | transcription_start_site | - | 203034 | 203034 | -2798 | 34154 | AN9124 |
| 2747 | CONTIG169 | 205653 | 206012 | 1.1  | 1.66E-01 | transcription_start_site | - | 201668 | 201668 | -4164 | 34155 | AN9124 |
| 2665 | CONTIG169 | 202728 | 203152 | 1.14 | 1.44E-01 | transcription_start_site | + | 203780 | 203780 | -840  | 34156 | AN9125 |
| 2665 | CONTIG169 | 202728 | 203152 | 1.14 | 1.44E-01 | transcription_start_site | + | 204085 | 204085 | -1145 | 34157 | AN9125 |
| 2747 | CONTIG169 | 205653 | 206012 | 1.1  | 1.66E-01 | transcription_start_site | - | 206401 | 206401 | 568   | 34158 | AN9126 |
| 308  | CONTIG169 | 219909 | 220403 | 2.75 | 0.00E+00 | transcription_start_site | - | 219310 | 219310 | -846  | 34173 | AN9130 |
| 1364 | CONTIG169 | 220444 | 221828 | 1.65 | 1.05E-02 | transcription_start_site | - | 219310 | 219310 | -1826 | 34173 | AN9130 |
| 1371 | CONTIG169 | 222319 | 222888 | 1.65 | 2.12E-02 | transcription_start_site | - | 219310 | 219310 | -3293 | 34173 | AN9130 |
| 2287 | CONTIG169 | 223059 | 223628 | 1.27 | 9.24E-02 | transcription_start_site | - | 219310 | 219310 | -4033 | 34173 | AN9130 |
| 308  | CONTIG169 | 219909 | 220403 | 2.75 | 0.00E+00 | transcription_start_site | + | 220664 | 220664 | -508  | 34174 | AN9131 |
| 308  | CONTIG169 | 219909 | 220403 | 2.75 | 0.00E+00 | transcription_start_site | + | 221898 | 221898 | -1742 | 34175 | AN9131 |
| 1364 | CONTIG169 | 220444 | 221828 | 1.65 | 1.05E-02 | transcription_start_site | + | 220664 | 220664 | 472   | 34174 | AN9131 |
| 1364 | CONTIG169 | 220444 | 221828 | 1.65 | 1.05E-02 | transcription_start_site | + | 221898 | 221898 | -762  | 34175 | AN9131 |
| 1371 | CONTIG169 | 222319 | 222888 | 1.65 | 2.12E-02 | transcription_start_site | + | 221898 | 221898 | 705   | 34175 | AN9131 |
| 2162 | CONTIG169 | 217584 | 217928 | 1.31 | 8.01E-02 | transcription_start_site | + | 220664 | 220664 | -2908 | 34174 | AN9131 |
| 2162 | CONTIG169 | 217584 | 217928 | 1.31 | 8.01E-02 | transcription_start_site | + | 221898 | 221898 | -4142 | 34175 | AN9131 |
| 2283 | CONTIG169 | 226879 | 227378 | 1.27 | 7.51E-02 | transcription_start_site | - | 226849 | 226849 | -279  | 34176 | AN9132 |
| 1057 | CONTIG169 | 232520 | 232784 | 1.86 | 8.81E-03 | transcription_start_site | - | 229132 | 229132 | -3520 | 34177 | AN9133 |
| 1057 | CONTIG169 | 232520 | 232784 | 1.86 | 8.81E-03 | transcription_start_site | - | 228733 | 228733 | -3919 | 34178 | AN9133 |
| 1057 | CONTIG169 | 232520 | 232784 | 1.86 | 8.81E-03 | transcription_start_site | - | 228377 | 228377 | -4275 | 34179 | AN9133 |
| 1057 | CONTIG169 | 232520 | 232784 | 1.86 | 8.81E-03 | transcription_start_site | - | 228025 | 228025 | -4627 | 34180 | AN9133 |
| 2283 | CONTIG169 | 226879 | 227378 | 1.27 | 7.51E-02 | transcription_start_site | - | 228025 | 228025 | 896   | 34180 | AN9133 |
| 2283 | CONTIG169 | 226879 | 227378 | 1.27 | 7.51E-02 | transcription_start_site | - | 228377 | 228377 | 1248  | 34179 | AN9133 |
| 1057 | CONTIG169 | 232520 | 232784 | 1.86 | 8.81E-03 | transcription_start_site | + | 232218 | 232218 | 434   | 34183 | AN9134 |
| 1057 | CONTIG169 | 232520 | 232784 | 1.86 | 8.81E-03 | transcription_start_site | + | 231931 | 231931 | 721   | 34182 | AN9134 |
| 2283 | CONTIG169 | 226879 | 227378 | 1.27 | 7.51E-02 | transcription_start_site | + | 231209 | 231209 | -4080 | 34181 | AN9134 |
| 2283 | CONTIG169 | 226879 | 227378 | 1.27 | 7.51E-02 | transcription_start_site | + | 231931 | 231931 | -4802 | 34182 | AN9134 |



|      |           |        |        |      |          |                          |   |        |        |       |       |        |
|------|-----------|--------|--------|------|----------|--------------------------|---|--------|--------|-------|-------|--------|
| 2283 | CONTIG169 | 226879 | 227378 | 1.27 | 7.51E-02 | transcription_start_site | + | 232218 | 232218 | -5089 | 34183 | AN9134 |
| 21   | CONTIG169 | 238070 | 238404 | 3.6  | 0.00E+00 | transcription_start_site | - | 237271 | 237271 | -966  | 34184 | AN9136 |
| 21   | CONTIG169 | 238070 | 238404 | 3.6  | 0.00E+00 | transcription_start_site | - | 237070 | 237070 | -1167 | 34185 | AN9136 |
| 21   | CONTIG169 | 238070 | 238404 | 3.6  | 0.00E+00 | transcription_start_site | - | 236950 | 236950 | -1287 | 34186 | AN9136 |
| 912  | CONTIG169 | 235968 | 236227 | 1.99 | 5.20E-03 | transcription_start_site | - | 236950 | 236950 | 852   | 34186 | AN9136 |
| 912  | CONTIG169 | 235968 | 236227 | 1.99 | 5.20E-03 | transcription_start_site | - | 237070 | 237070 | 972   | 34185 | AN9136 |
| 21   | CONTIG169 | 238070 | 238404 | 3.6  | 0.00E+00 | transcription_start_site | + | 239794 | 239794 | -1557 | 34187 | AN9137 |
| 21   | CONTIG169 | 238070 | 238404 | 3.6  | 0.00E+00 | transcription_start_site | + | 239952 | 239952 | -1715 | 34188 | AN9137 |
| 21   | CONTIG169 | 238070 | 238404 | 3.6  | 0.00E+00 | transcription_start_site | + | 240359 | 240359 | -2122 | 34189 | AN9137 |
| 912  | CONTIG169 | 235968 | 236227 | 1.99 | 5.20E-03 | transcription_start_site | + | 239794 | 239794 | -3696 | 34187 | AN9137 |
| 912  | CONTIG169 | 235968 | 236227 | 1.99 | 5.20E-03 | transcription_start_site | + | 239952 | 239952 | -3854 | 34188 | AN9137 |
| 912  | CONTIG169 | 235968 | 236227 | 1.99 | 5.20E-03 | transcription_start_site | + | 240359 | 240359 | -4261 | 34189 | AN9137 |
| 21   | CONTIG169 | 238070 | 238404 | 3.6  | 0.00E+00 | transcription_start_site | + | 240782 | 240782 | -2545 | 34190 | AN9138 |
| 21   | CONTIG169 | 238070 | 238404 | 3.6  | 0.00E+00 | transcription_start_site | + | 240890 | 240890 | -2653 | 34191 | AN9138 |
| 21   | CONTIG169 | 238070 | 238404 | 3.6  | 0.00E+00 | transcription_start_site | + | 241334 | 241334 | -3097 | 34192 | AN9138 |
| 21   | CONTIG169 | 238070 | 238404 | 3.6  | 0.00E+00 | transcription_start_site | + | 241866 | 241866 | -3629 | 34193 | AN9138 |
| 912  | CONTIG169 | 235968 | 236227 | 1.99 | 5.20E-03 | transcription_start_site | + | 240782 | 240782 | -4684 | 34190 | AN9138 |
| 912  | CONTIG169 | 235968 | 236227 | 1.99 | 5.20E-03 | transcription_start_site | + | 240890 | 240890 | -4792 | 34191 | AN9138 |
| 21   | CONTIG169 | 238070 | 238404 | 3.6  | 0.00E+00 | transcription_start_site | + | 242980 | 242980 | -4743 | 34194 | AN9139 |
| 2816 | CONTIG169 | 255531 | 255800 | 1.06 | 1.93E-01 | transcription_start_site | - | 253507 | 253507 | -2158 | 34208 | AN9142 |
| 2816 | CONTIG169 | 255531 | 255800 | 1.06 | 1.93E-01 | transcription_start_site | - | 253274 | 253274 | -2391 | 34209 | AN9142 |
| 2816 | CONTIG169 | 255531 | 255800 | 1.06 | 1.93E-01 | transcription_start_site | - | 252842 | 252842 | -2823 | 34210 | AN9142 |
| 2816 | CONTIG169 | 255531 | 255800 | 1.06 | 1.93E-01 | transcription_start_site | - | 255127 | 255127 | -538  | 34211 | AN9143 |
| 1519 | CONTIG169 | 277892 | 278166 | 1.57 | 3.08E-02 | transcription_start_site | - | 277347 | 277347 | -682  | 34222 | AN9148 |
| 1519 | CONTIG169 | 277892 | 278166 | 1.57 | 3.08E-02 | transcription_start_site | - | 276829 | 276829 | -1200 | 34223 | AN9148 |
| 1745 | CONTIG169 | 284708 | 284977 | 1.48 | 4.36E-02 | transcription_start_site | - | 284030 | 284030 | -812  | 34224 | AN9149 |
| 1745 | CONTIG169 | 284708 | 284977 | 1.48 | 4.36E-02 | transcription_start_site | - | 283756 | 283756 | -1086 | 34225 | AN9149 |
| 1745 | CONTIG169 | 284708 | 284977 | 1.48 | 4.36E-02 | transcription_start_site | - | 283635 | 283635 | -1207 | 34226 | AN9149 |
| 1745 | CONTIG169 | 284708 | 284977 | 1.48 | 4.36E-02 | transcription_start_site | - | 283333 | 283333 | -1509 | 34227 | AN9149 |
| 1745 | CONTIG169 | 284708 | 284977 | 1.48 | 4.36E-02 | transcription_start_site | - | 280867 | 280867 | -3975 | 34228 | AN9149 |
| 1745 | CONTIG169 | 284708 | 284977 | 1.48 | 4.36E-02 | transcription_start_site | - | 280674 | 280674 | -4168 | 34229 | AN9149 |
| 774  | CONTIG169 | 289503 | 289777 | 2.12 | 3.03E-03 | transcription_start_site | + | 294378 | 294378 | -4738 | 34230 | AN9151 |
| 774  | CONTIG169 | 289503 | 289777 | 2.12 | 3.03E-03 | transcription_start_site | + | 294599 | 294599 | -4959 | 34231 | AN9151 |
| 2288 | CONTIG169 | 291768 | 292037 | 1.27 | 9.24E-02 | transcription_start_site | + | 294378 | 294378 | -2475 | 34230 | AN9151 |
| 2288 | CONTIG169 | 291768 | 292037 | 1.27 | 9.24E-02 | transcription_start_site | + | 294599 | 294599 | -2696 | 34231 | AN9151 |
| 2409 | CONTIG169 | 320266 | 320845 | 1.23 | 1.08E-01 | transcription_start_site | - | 320254 | 320254 | -301  | 34240 | AN9156 |
| 2409 | CONTIG169 | 320266 | 320845 | 1.23 | 1.08E-01 | transcription_start_site | - | 319553 | 319553 | -1002 | 34241 | AN9156 |
| 2409 | CONTIG169 | 320266 | 320845 | 1.23 | 1.08E-01 | transcription_start_site | - | 318674 | 318674 | -1881 | 34242 | AN9156 |
| 2161 | CONTIG169 | 326496 | 326985 | 1.31 | 6.16E-02 | transcription_start_site | - | 322682 | 322682 | -4058 | 34243 | AN9157 |
| 2161 | CONTIG169 | 326496 | 326985 | 1.31 | 6.16E-02 | transcription_start_site | - | 322265 | 322265 | -4475 | 34244 | AN9157 |
| 2161 | CONTIG169 | 326496 | 326985 | 1.31 | 6.16E-02 | transcription_start_site | - | 322138 | 322138 | -4602 | 34245 | AN9157 |
| 2161 | CONTIG169 | 326496 | 326985 | 1.31 | 6.16E-02 | transcription_start_site | - | 321800 | 321800 | -4940 | 34246 | AN9157 |
| 2161 | CONTIG169 | 326496 | 326985 | 1.31 | 6.16E-02 | transcription_start_site | - | 321675 | 321675 | -5065 | 34247 | AN9157 |
| 2409 | CONTIG169 | 320266 | 320845 | 1.23 | 1.08E-01 | transcription_start_site | - | 321675 | 321675 | 1119  | 34247 | AN9157 |
| 2409 | CONTIG169 | 320266 | 320845 | 1.23 | 1.08E-01 | transcription_start_site | - | 321800 | 321800 | 1244  | 34246 | AN9157 |
| 2409 | CONTIG169 | 320266 | 320845 | 1.23 | 1.08E-01 | transcription_start_site | + | 323855 | 323855 | -3299 | 34248 | AN9158 |
| 2161 | CONTIG169 | 326496 | 326985 | 1.31 | 6.16E-02 | transcription_start_site | - | 326514 | 326514 | -226  | 34249 | AN9159 |
| 2161 | CONTIG169 | 326496 | 326985 | 1.31 | 6.16E-02 | transcription_start_site | - | 325941 | 325941 | -799  | 34250 | AN9159 |
| 2161 | CONTIG169 | 326496 | 326985 | 1.31 | 6.16E-02 | transcription_start_site | - | 325494 | 325494 | -1246 | 34251 | AN9159 |
| 2161 | CONTIG169 | 326496 | 326985 | 1.31 | 6.16E-02 | transcription_start_site | + | 331482 | 331482 | -4741 | 34252 | AN9161 |
| 2161 | CONTIG169 | 326496 | 326985 | 1.31 | 6.16E-02 | transcription_start_site | + | 331591 | 331591 | -4850 | 34253 | AN9161 |
| 1515 | CONTIG169 | 346819 | 348002 | 1.57 | 1.23E-02 | transcription_start_site | - | 341928 | 341928 | -5482 | 34269 | AN9165 |
| 1010 | CONTIG169 | 349881 | 350245 | 1.9  | 7.85E-03 | transcription_start_site | - | 347235 | 347235 | -2828 | 34278 | AN9167 |
| 1515 | CONTIG169 | 346819 | 348002 | 1.57 | 1.23E-02 | transcription_start_site | - | 347235 | 347235 | -175  | 34278 | AN9167 |
| 1010 | CONTIG169 | 349881 | 350245 | 1.9  | 7.85E-03 | transcription_start_site | - | 350512 | 350512 | 449   | 34279 | AN9168 |
| 1896 | CONTIG170 | 7661   | 8017   | 1.41 | 4.36E-02 | transcription_start_site | - | 7548   | 7548   | -291  | 34291 | AN9171 |
| 1896 | CONTIG170 | 7661   | 8017   | 1.41 | 4.36E-02 | transcription_start_site | - | 7410   | 7410   | -429  | 34292 | AN9171 |

|      |           |       |       |      |          |                          |   |       |       |       |       |        |
|------|-----------|-------|-------|------|----------|--------------------------|---|-------|-------|-------|-------|--------|
| 1896 | CONTIG170 | 7661  | 8017  | 1.41 | 4.36E-02 | transcription_start_site | - | 7288  | 7288  | -551  | 34293 | AN9171 |
| 2476 | CONTIG170 | 9526  | 9805  | 1.21 | 9.24E-02 | transcription_start_site | - | 7548  | 7548  | -2117 | 34291 | AN9171 |
| 2476 | CONTIG170 | 9526  | 9805  | 1.21 | 9.24E-02 | transcription_start_site | - | 7410  | 7410  | -2255 | 34292 | AN9171 |
| 2476 | CONTIG170 | 9526  | 9805  | 1.21 | 9.24E-02 | transcription_start_site | - | 7288  | 7288  | -2377 | 34293 | AN9171 |
| 1896 | CONTIG170 | 7661  | 8017  | 1.41 | 4.36E-02 | transcription_start_site | + | 8311  | 8311  | -472  | 34294 | AN9172 |
| 1896 | CONTIG170 | 7661  | 8017  | 1.41 | 4.36E-02 | transcription_start_site | + | 9017  | 9017  | -1178 | 34295 | AN9172 |
| 1896 | CONTIG170 | 7661  | 8017  | 1.41 | 4.36E-02 | transcription_start_site | + | 9216  | 9216  | -1377 | 34296 | AN9172 |
| 2476 | CONTIG170 | 9526  | 9805  | 1.21 | 9.24E-02 | transcription_start_site | + | 9216  | 9216  | 449   | 34296 | AN9172 |
| 2476 | CONTIG170 | 9526  | 9805  | 1.21 | 9.24E-02 | transcription_start_site | + | 9017  | 9017  | 648   | 34295 | AN9172 |
| 199  | CONTIG170 | 12676 | 13115 | 2.94 | 0.00E+00 | transcription_start_site | - | 12125 | 12125 | -770  | 34297 | AN9173 |
| 199  | CONTIG170 | 12676 | 13115 | 2.94 | 0.00E+00 | transcription_start_site | - | 12046 | 12046 | -849  | 34298 | AN9173 |
| 199  | CONTIG170 | 12676 | 13115 | 2.94 | 0.00E+00 | transcription_start_site | - | 11680 | 11680 | -1215 | 34299 | AN9173 |
| 199  | CONTIG170 | 12676 | 13115 | 2.94 | 0.00E+00 | transcription_start_site | - | 11525 | 11525 | -1370 | 34300 | AN9173 |
| 199  | CONTIG170 | 12676 | 13115 | 2.94 | 0.00E+00 | transcription_start_site | - | 11000 | 11000 | -1895 | 34301 | AN9173 |
| 199  | CONTIG170 | 12676 | 13115 | 2.94 | 0.00E+00 | transcription_start_site | + | 15157 | 15157 | -2261 | 34302 | AN9174 |
| 199  | CONTIG170 | 12676 | 13115 | 2.94 | 0.00E+00 | transcription_start_site | + | 15803 | 15803 | -2907 | 34303 | AN9174 |
| 199  | CONTIG170 | 12676 | 13115 | 2.94 | 0.00E+00 | transcription_start_site | + | 16333 | 16333 | -3437 | 34304 | AN9174 |
| 2830 | CONTIG170 | 24842 | 25401 | 1.05 | 1.66E-01 | transcription_start_site | + | 27760 | 27760 | -2638 | 34308 | AN9178 |
| 2830 | CONTIG170 | 24842 | 25401 | 1.05 | 1.66E-01 | transcription_start_site | + | 28070 | 28070 | -2948 | 34309 | AN9178 |
| 2830 | CONTIG170 | 24842 | 25401 | 1.05 | 1.66E-01 | transcription_start_site | + | 30343 | 30343 | -5221 | 34310 | AN9178 |
| 834  | CONTIG170 | 35119 | 35768 | 2.06 | 0.00E+00 | transcription_start_site | + | 35018 | 35018 | 425   | 34315 | AN9179 |
| 834  | CONTIG170 | 35119 | 35768 | 2.06 | 0.00E+00 | transcription_start_site | + | 34565 | 34565 | 878   | 34314 | AN9179 |
| 834  | CONTIG170 | 35119 | 35768 | 2.06 | 0.00E+00 | transcription_start_site | + | 34374 | 34374 | 1069  | 34313 | AN9179 |
| 834  | CONTIG170 | 35119 | 35768 | 2.06 | 0.00E+00 | transcription_start_site | + | 35774 | 35774 | -330  | 34316 | AN9180 |
| 1367 | CONTIG170 | 48904 | 49253 | 1.65 | 1.57E-02 | transcription_start_site | - | 45716 | 45716 | -3362 | 34319 | AN9183 |
| 1367 | CONTIG170 | 48904 | 49253 | 1.65 | 1.57E-02 | transcription_start_site | - | 45403 | 45403 | -3675 | 34320 | AN9183 |
| 2831 | CONTIG170 | 47254 | 47768 | 1.05 | 1.66E-01 | transcription_start_site | - | 45716 | 45716 | -1795 | 34319 | AN9183 |
| 2831 | CONTIG170 | 47254 | 47768 | 1.05 | 1.66E-01 | transcription_start_site | - | 45403 | 45403 | -2108 | 34320 | AN9183 |
| 1367 | CONTIG170 | 48904 | 49253 | 1.65 | 1.57E-02 | transcription_start_site | - | 48151 | 48151 | -927  | 34321 | AN9184 |
| 1367 | CONTIG170 | 48904 | 49253 | 1.65 | 1.57E-02 | transcription_start_site | - | 47973 | 47973 | -1105 | 34322 | AN9184 |
| 1367 | CONTIG170 | 48904 | 49253 | 1.65 | 1.57E-02 | transcription_start_site | - | 47538 | 47538 | -1540 | 34323 | AN9184 |
| 2831 | CONTIG170 | 47254 | 47768 | 1.05 | 1.66E-01 | transcription_start_site | - | 47538 | 47538 | 27    | 34323 | AN9184 |
| 2831 | CONTIG170 | 47254 | 47768 | 1.05 | 1.66E-01 | transcription_start_site | - | 47973 | 47973 | 462   | 34322 | AN9184 |
| 2831 | CONTIG170 | 47254 | 47768 | 1.05 | 1.66E-01 | transcription_start_site | - | 48151 | 48151 | 640   | 34321 | AN9184 |
| 1367 | CONTIG170 | 48904 | 49253 | 1.65 | 1.57E-02 | transcription_start_site | - | 49634 | 49634 | 555   | 34325 | AN9185 |
| 1367 | CONTIG170 | 48904 | 49253 | 1.65 | 1.57E-02 | transcription_start_site | - | 49815 | 49815 | 736   | 34324 | AN9185 |
| 2465 | CONTIG170 | 54319 | 55649 | 1.21 | 5.02E-02 | transcription_start_site | - | 49815 | 49815 | -5169 | 34324 | AN9185 |
| 2465 | CONTIG170 | 54319 | 55649 | 1.21 | 5.02E-02 | transcription_start_site | - | 49634 | 49634 | -5350 | 34325 | AN9185 |
| 2465 | CONTIG170 | 54319 | 55649 | 1.21 | 5.02E-02 | transcription_start_site | - | 52417 | 52417 | -2567 | 34326 | AN9186 |
| 2465 | CONTIG170 | 54319 | 55649 | 1.21 | 5.02E-02 | transcription_start_site | - | 51979 | 51979 | -3005 | 34327 | AN9186 |
| 1998 | CONTIG170 | 59642 | 59916 | 1.37 | 5.22E-02 | transcription_start_site | - | 54896 | 54896 | -4883 | 34328 | AN9187 |
| 2465 | CONTIG170 | 54319 | 55649 | 1.21 | 5.02E-02 | transcription_start_site | - | 54896 | 54896 | -88   | 34328 | AN9187 |
| 2465 | CONTIG170 | 54319 | 55649 | 1.21 | 5.02E-02 | transcription_start_site | + | 55558 | 55558 | -574  | 34329 | AN9188 |
| 2465 | CONTIG170 | 54319 | 55649 | 1.21 | 5.02E-02 | transcription_start_site | + | 55608 | 55608 | -624  | 34330 | AN9188 |
| 2465 | CONTIG170 | 54319 | 55649 | 1.21 | 5.02E-02 | transcription_start_site | + | 55829 | 55829 | -845  | 34331 | AN9188 |
| 2465 | CONTIG170 | 54319 | 55649 | 1.21 | 5.02E-02 | transcription_start_site | + | 56032 | 56032 | -1048 | 34332 | AN9188 |
| 1998 | CONTIG170 | 59642 | 59916 | 1.37 | 5.22E-02 | transcription_start_site | - | 57973 | 57973 | -1806 | 34333 | AN9189 |
| 1998 | CONTIG170 | 59642 | 59916 | 1.37 | 5.22E-02 | transcription_start_site | - | 57488 | 57488 | -2291 | 34334 | AN9189 |
| 2477 | CONTIG170 | 62852 | 63131 | 1.21 | 9.24E-02 | transcription_start_site | - | 57973 | 57973 | -5018 | 34333 | AN9189 |
| 2477 | CONTIG170 | 62852 | 63131 | 1.21 | 9.24E-02 | transcription_start_site | - | 61554 | 61554 | -1437 | 34335 | AN9191 |
| 1446 | CONTIG170 | 66832 | 67191 | 1.61 | 1.84E-02 | transcription_start_site | - | 63199 | 63199 | -3812 | 34336 | AN9192 |
| 1446 | CONTIG170 | 66832 | 67191 | 1.61 | 1.84E-02 | transcription_start_site | - | 63061 | 63061 | -3950 | 34337 | AN9192 |
| 1446 | CONTIG170 | 66832 | 67191 | 1.61 | 1.84E-02 | transcription_start_site | - | 62150 | 62150 | -4861 | 34338 | AN9192 |
| 1446 | CONTIG170 | 66832 | 67191 | 1.61 | 1.84E-02 | transcription_start_site | - | 61845 | 61845 | -5166 | 34339 | AN9192 |
| 2477 | CONTIG170 | 62852 | 63131 | 1.21 | 9.24E-02 | transcription_start_site | - | 63061 | 63061 | 69    | 34337 | AN9192 |
| 2477 | CONTIG170 | 62852 | 63131 | 1.21 | 9.24E-02 | transcription_start_site | - | 63199 | 63199 | 207   | 34336 | AN9192 |
| 2477 | CONTIG170 | 62852 | 63131 | 1.21 | 9.24E-02 | transcription_start_site | - | 62150 | 62150 | -841  | 34338 | AN9192 |

|                |        |        |      |          |                          |   |        |        |       |       |        |
|----------------|--------|--------|------|----------|--------------------------|---|--------|--------|-------|-------|--------|
| 2477 CONTIG170 | 62852  | 63131  | 1.21 | 9.24E-02 | transcription_start_site | - | 61845  | 61845  | -1146 | 34339 | AN9192 |
| 1998 CONTIG170 | 59642  | 59916  | 1.37 | 5.22E-02 | transcription_start_site | + | 64207  | 64207  | -4428 | 34340 | AN9193 |
| 1998 CONTIG170 | 59642  | 59916  | 1.37 | 5.22E-02 | transcription_start_site | + | 64317  | 64317  | -4538 | 34341 | AN9193 |
| 1998 CONTIG170 | 59642  | 59916  | 1.37 | 5.22E-02 | transcription_start_site | + | 64485  | 64485  | -4706 | 34342 | AN9193 |
| 1998 CONTIG170 | 59642  | 59916  | 1.37 | 5.22E-02 | transcription_start_site | + | 64796  | 64796  | -5017 | 34343 | AN9193 |
| 2477 CONTIG170 | 62852  | 63131  | 1.21 | 9.24E-02 | transcription_start_site | + | 64207  | 64207  | -1215 | 34340 | AN9193 |
| 2477 CONTIG170 | 62852  | 63131  | 1.21 | 9.24E-02 | transcription_start_site | + | 64317  | 64317  | -1325 | 34341 | AN9193 |
| 2477 CONTIG170 | 62852  | 63131  | 1.21 | 9.24E-02 | transcription_start_site | + | 64485  | 64485  | -1493 | 34342 | AN9193 |
| 2477 CONTIG170 | 62852  | 63131  | 1.21 | 9.24E-02 | transcription_start_site | + | 64796  | 64796  | -1804 | 34343 | AN9193 |
| 1446 CONTIG170 | 66832  | 67191  | 1.61 | 1.84E-02 | transcription_start_site | + | 67013  | 67013  | -1    | 34344 | AN9194 |
| 1446 CONTIG170 | 66832  | 67191  | 1.61 | 1.84E-02 | transcription_start_site | + | 67543  | 67543  | -531  | 34345 | AN9194 |
| 1446 CONTIG170 | 66832  | 67191  | 1.61 | 1.84E-02 | transcription_start_site | + | 67702  | 67702  | -690  | 34346 | AN9194 |
| 1446 CONTIG170 | 66832  | 67191  | 1.61 | 1.84E-02 | transcription_start_site | + | 67936  | 67936  | -924  | 34347 | AN9194 |
| 2477 CONTIG170 | 62852  | 63131  | 1.21 | 9.24E-02 | transcription_start_site | + | 67013  | 67013  | -4021 | 34344 | AN9194 |
| 2477 CONTIG170 | 62852  | 63131  | 1.21 | 9.24E-02 | transcription_start_site | + | 67543  | 67543  | -4551 | 34345 | AN9194 |
| 2477 CONTIG170 | 62852  | 63131  | 1.21 | 9.24E-02 | transcription_start_site | + | 67702  | 67702  | -4710 | 34346 | AN9194 |
| 2477 CONTIG170 | 62852  | 63131  | 1.21 | 9.24E-02 | transcription_start_site | + | 67936  | 67936  | -4944 | 34347 | AN9194 |
| 921 CONTIG170  | 69306  | 69742  | 1.98 | 3.61E-03 | transcription_start_site | + | 69587  | 69587  | -63   | 34348 | AN9195 |
| 1446 CONTIG170 | 66832  | 67191  | 1.61 | 1.84E-02 | transcription_start_site | + | 69587  | 69587  | -2575 | 34348 | AN9195 |
| 921 CONTIG170  | 69306  | 69742  | 1.98 | 3.61E-03 | transcription_start_site | + | 72373  | 72373  | -2849 | 34349 | AN9196 |
| 921 CONTIG170  | 69306  | 69742  | 1.98 | 3.61E-03 | transcription_start_site | + | 72945  | 72945  | -3421 | 34350 | AN9196 |
| 922 CONTIG170  | 79651  | 79925  | 1.98 | 3.61E-03 | transcription_start_site | - | 78964  | 78964  | -824  | 34353 | AN9198 |
| 922 CONTIG170  | 79651  | 79925  | 1.98 | 3.61E-03 | transcription_start_site | - | 78881  | 78881  | -907  | 34354 | AN9198 |
| 922 CONTIG170  | 79651  | 79925  | 1.98 | 3.61E-03 | transcription_start_site | - | 78604  | 78604  | -1184 | 34355 | AN9198 |
| 922 CONTIG170  | 79651  | 79925  | 1.98 | 3.61E-03 | transcription_start_site | - | 78282  | 78282  | -1506 | 34356 | AN9198 |
| 922 CONTIG170  | 79651  | 79925  | 1.98 | 3.61E-03 | transcription_start_site | - | 77779  | 77779  | -2009 | 34357 | AN9198 |
| 922 CONTIG170  | 79651  | 79925  | 1.98 | 3.61E-03 | transcription_start_site | - | 77665  | 77665  | -2123 | 34358 | AN9198 |
| 923 CONTIG170  | 81152  | 82113  | 1.98 | 3.61E-03 | transcription_start_site | - | 78964  | 78964  | -2668 | 34353 | AN9198 |
| 923 CONTIG170  | 81152  | 82113  | 1.98 | 3.61E-03 | transcription_start_site | - | 78881  | 78881  | -2751 | 34354 | AN9198 |
| 923 CONTIG170  | 81152  | 82113  | 1.98 | 3.61E-03 | transcription_start_site | - | 78604  | 78604  | -3028 | 34355 | AN9198 |
| 923 CONTIG170  | 81152  | 82113  | 1.98 | 3.61E-03 | transcription_start_site | - | 78282  | 78282  | -3350 | 34356 | AN9198 |
| 923 CONTIG170  | 81152  | 82113  | 1.98 | 3.61E-03 | transcription_start_site | - | 77779  | 77779  | -3853 | 34357 | AN9198 |
| 923 CONTIG170  | 81152  | 82113  | 1.98 | 3.61E-03 | transcription_start_site | - | 77665  | 77665  | -3967 | 34358 | AN9198 |
| 922 CONTIG170  | 79651  | 79925  | 1.98 | 3.61E-03 | transcription_start_site | - | 80350  | 80350  | 562   | 34360 | AN9199 |
| 923 CONTIG170  | 81152  | 82113  | 1.98 | 3.61E-03 | transcription_start_site | - | 81047  | 81047  | -585  | 34359 | AN9199 |
| 923 CONTIG170  | 81152  | 82113  | 1.98 | 3.61E-03 | transcription_start_site | - | 80350  | 80350  | -1282 | 34360 | AN9199 |
| 922 CONTIG170  | 79651  | 79925  | 1.98 | 3.61E-03 | transcription_start_site | + | 83753  | 83753  | -3965 | 34361 | AN9200 |
| 922 CONTIG170  | 79651  | 79925  | 1.98 | 3.61E-03 | transcription_start_site | + | 84098  | 84098  | -4310 | 34362 | AN9200 |
| 923 CONTIG170  | 81152  | 82113  | 1.98 | 3.61E-03 | transcription_start_site | + | 83753  | 83753  | -2120 | 34361 | AN9200 |
| 923 CONTIG170  | 81152  | 82113  | 1.98 | 3.61E-03 | transcription_start_site | + | 84098  | 84098  | -2465 | 34362 | AN9200 |
| 1067 CONTIG170 | 109276 | 109713 | 1.85 | 2.49E-03 | transcription_start_site | - | 107004 | 107004 | -2490 | 34372 | AN9205 |
| 1067 CONTIG170 | 109276 | 109713 | 1.85 | 2.49E-03 | transcription_start_site | - | 106715 | 106715 | -2779 | 34373 | AN9205 |
| 1067 CONTIG170 | 109276 | 109713 | 1.85 | 2.49E-03 | transcription_start_site | - | 106389 | 106389 | -3105 | 34374 | AN9205 |
| 1067 CONTIG170 | 109276 | 109713 | 1.85 | 2.49E-03 | transcription_start_site | - | 109095 | 109095 | -399  | 34375 | AN9206 |
| 1067 CONTIG170 | 109276 | 109713 | 1.85 | 2.49E-03 | transcription_start_site | - | 108648 | 108648 | -846  | 34376 | AN9206 |
| 1067 CONTIG170 | 109276 | 109713 | 1.85 | 2.49E-03 | transcription_start_site | + | 109775 | 109775 | -280  | 34377 | AN9207 |
| 1067 CONTIG170 | 109276 | 109713 | 1.85 | 2.49E-03 | transcription_start_site | + | 110128 | 110128 | -633  | 34378 | AN9207 |
| 1067 CONTIG170 | 109276 | 109713 | 1.85 | 2.49E-03 | transcription_start_site | + | 110694 | 110694 | -1199 | 34379 | AN9207 |
| 2674 CONTIG170 | 120170 | 120964 | 1.13 | 1.09E-01 | transcription_start_site | - | 115534 | 115534 | -5033 | 34382 | AN9209 |
| 2674 CONTIG170 | 120170 | 120964 | 1.13 | 1.09E-01 | transcription_start_site | - | 115204 | 115204 | -5363 | 34383 | AN9209 |
| 2674 CONTIG170 | 120170 | 120964 | 1.13 | 1.09E-01 | transcription_start_site | + | 119309 | 119309 | 1258  | 34389 | AN9210 |
| 2674 CONTIG170 | 120170 | 120964 | 1.13 | 1.09E-01 | transcription_start_site | + | 120489 | 120489 | 78    | 34391 | AN9211 |
| 2674 CONTIG170 | 120170 | 120964 | 1.13 | 1.09E-01 | transcription_start_site | + | 120142 | 120142 | 425   | 34390 | AN9211 |
| 2674 CONTIG170 | 120170 | 120964 | 1.13 | 1.09E-01 | transcription_start_site | + | 121050 | 121050 | -483  | 34392 | AN9211 |
| 2674 CONTIG170 | 120170 | 120964 | 1.13 | 1.09E-01 | transcription_start_site | + | 121124 | 121124 | -557  | 34393 | AN9211 |
| 2674 CONTIG170 | 120170 | 120964 | 1.13 | 1.09E-01 | transcription_start_site | + | 121280 | 121280 | -713  | 34394 | AN9211 |
| 2354 CONTIG170 | 140552 | 140831 | 1.25 | 8.01E-02 | transcription_start_site | + | 140133 | 140133 | 558   | 34410 | AN9216 |

|      |           |        |        |      |          |                          |   |        |        |       |       |        |
|------|-----------|--------|--------|------|----------|--------------------------|---|--------|--------|-------|-------|--------|
| 2990 | CONTIG172 | 15463  | 15732  | 0.93 | 1.93E-01 | transcription_start_site | - | 15512  | 15512  | -85   | 34483 | AN9243 |
| 2990 | CONTIG172 | 15463  | 15732  | 0.93 | 1.93E-01 | transcription_start_site | - | 15782  | 15782  | 184   | 34482 | AN9243 |
| 2990 | CONTIG172 | 15463  | 15732  | 0.93 | 1.93E-01 | transcription_start_site | - | 16129  | 16129  | 531   | 34481 | AN9243 |
| 2990 | CONTIG172 | 15463  | 15732  | 0.93 | 1.93E-01 | transcription_start_site | - | 14910  | 14910  | -687  | 34484 | AN9243 |
| 69   | CONTIG172 | 84095  | 84440  | 3.32 | 0.00E+00 | transcription_start_site | + | 83167  | 83167  | 1100  | 34543 | AN9263 |
| 1376 | CONTIG172 | 95109  | 95678  | 1.64 | 4.17E-03 | transcription_start_site | + | 94823  | 94823  | 570   | 34551 | AN9267 |
| 269  | CONTIG172 | 149634 | 150053 | 2.8  | 0.00E+00 | transcription_start_site | - | 147731 | 147731 | -2112 | 34581 | AN9283 |
| 269  | CONTIG172 | 149634 | 150053 | 2.8  | 0.00E+00 | transcription_start_site | - | 147625 | 147625 | -2218 | 34582 | AN9283 |
| 269  | CONTIG172 | 149634 | 150053 | 2.8  | 0.00E+00 | transcription_start_site | - | 145734 | 145734 | -4109 | 34583 | AN9283 |
| 269  | CONTIG172 | 149634 | 150053 | 2.8  | 0.00E+00 | transcription_start_site | - | 145216 | 145216 | -4627 | 34584 | AN9283 |
| 269  | CONTIG172 | 149634 | 150053 | 2.8  | 0.00E+00 | transcription_start_site | - | 144662 | 144662 | -5181 | 34585 | AN9283 |
| 1445 | CONTIG172 | 150534 | 150893 | 1.61 | 1.11E-02 | transcription_start_site | - | 147731 | 147731 | -2982 | 34581 | AN9283 |
| 1445 | CONTIG172 | 150534 | 150893 | 1.61 | 1.11E-02 | transcription_start_site | - | 147625 | 147625 | -3088 | 34582 | AN9283 |
| 1445 | CONTIG172 | 150534 | 150893 | 1.61 | 1.11E-02 | transcription_start_site | - | 145734 | 145734 | -4979 | 34583 | AN9283 |
| 2991 | CONTIG172 | 152119 | 152693 | 0.93 | 1.93E-01 | transcription_start_site | - | 147731 | 147731 | -4675 | 34581 | AN9283 |
| 2991 | CONTIG172 | 152119 | 152693 | 0.93 | 1.93E-01 | transcription_start_site | - | 147625 | 147625 | -4781 | 34582 | AN9283 |
| 269  | CONTIG172 | 149634 | 150053 | 2.8  | 0.00E+00 | transcription_start_site | - | 149464 | 149464 | -379  | 34590 | AN9285 |
| 269  | CONTIG172 | 149634 | 150053 | 2.8  | 0.00E+00 | transcription_start_site | - | 149389 | 149389 | -454  | 34591 | AN9285 |
| 269  | CONTIG172 | 149634 | 150053 | 2.8  | 0.00E+00 | transcription_start_site | - | 149148 | 149148 | -695  | 34592 | AN9285 |
| 1445 | CONTIG172 | 150534 | 150893 | 1.61 | 1.11E-02 | transcription_start_site | - | 149464 | 149464 | -1249 | 34590 | AN9285 |
| 1445 | CONTIG172 | 150534 | 150893 | 1.61 | 1.11E-02 | transcription_start_site | - | 149389 | 149389 | -1324 | 34591 | AN9285 |
| 1445 | CONTIG172 | 150534 | 150893 | 1.61 | 1.11E-02 | transcription_start_site | - | 149148 | 149148 | -1565 | 34592 | AN9285 |
| 2991 | CONTIG172 | 152119 | 152693 | 0.93 | 1.93E-01 | transcription_start_site | - | 149464 | 149464 | -2942 | 34590 | AN9285 |
| 2991 | CONTIG172 | 152119 | 152693 | 0.93 | 1.93E-01 | transcription_start_site | - | 149389 | 149389 | -3017 | 34591 | AN9285 |
| 2991 | CONTIG172 | 152119 | 152693 | 0.93 | 1.93E-01 | transcription_start_site | - | 149148 | 149148 | -3258 | 34592 | AN9285 |
| 2991 | CONTIG172 | 152119 | 152693 | 0.93 | 1.93E-01 | transcription_start_site | - | 152669 | 152669 | 263   | 34593 | AN9286 |
| 2992 | CONTIG172 | 155569 | 156443 | 0.93 | 1.93E-01 | transcription_start_site | - | 152669 | 152669 | -3337 | 34593 | AN9286 |
| 269  | CONTIG172 | 149634 | 150053 | 2.8  | 0.00E+00 | transcription_start_site | + | 153102 | 153102 | -3258 | 34594 | AN9287 |
| 269  | CONTIG172 | 149634 | 150053 | 2.8  | 0.00E+00 | transcription_start_site | + | 153366 | 153366 | -3522 | 34595 | AN9287 |
| 269  | CONTIG172 | 149634 | 150053 | 2.8  | 0.00E+00 | transcription_start_site | + | 153976 | 153976 | -4132 | 34596 | AN9287 |
| 1445 | CONTIG172 | 150534 | 150893 | 1.61 | 1.11E-02 | transcription_start_site | + | 153102 | 153102 | -2388 | 34594 | AN9287 |
| 1445 | CONTIG172 | 150534 | 150893 | 1.61 | 1.11E-02 | transcription_start_site | + | 153366 | 153366 | -2652 | 34595 | AN9287 |
| 1445 | CONTIG172 | 150534 | 150893 | 1.61 | 1.11E-02 | transcription_start_site | + | 153976 | 153976 | -3262 | 34596 | AN9287 |
| 2991 | CONTIG172 | 152119 | 152693 | 0.93 | 1.93E-01 | transcription_start_site | + | 153102 | 153102 | -696  | 34594 | AN9287 |
| 2991 | CONTIG172 | 152119 | 152693 | 0.93 | 1.93E-01 | transcription_start_site | + | 153366 | 153366 | -960  | 34595 | AN9287 |
| 2991 | CONTIG172 | 152119 | 152693 | 0.93 | 1.93E-01 | transcription_start_site | + | 153976 | 153976 | -1570 | 34596 | AN9287 |
| 1445 | CONTIG172 | 150534 | 150893 | 1.61 | 1.11E-02 | transcription_start_site | + | 155496 | 155496 | -4782 | 34597 | AN9288 |
| 1445 | CONTIG172 | 150534 | 150893 | 1.61 | 1.11E-02 | transcription_start_site | + | 155622 | 155622 | -4908 | 34598 | AN9288 |
| 2991 | CONTIG172 | 152119 | 152693 | 0.93 | 1.93E-01 | transcription_start_site | + | 155496 | 155496 | -3090 | 34597 | AN9288 |
| 2991 | CONTIG172 | 152119 | 152693 | 0.93 | 1.93E-01 | transcription_start_site | + | 155622 | 155622 | -3216 | 34598 | AN9288 |
| 2992 | CONTIG172 | 155569 | 156443 | 0.93 | 1.93E-01 | transcription_start_site | + | 155622 | 155622 | 384   | 34598 | AN9288 |
| 2992 | CONTIG172 | 155569 | 156443 | 0.93 | 1.93E-01 | transcription_start_site | + | 155496 | 155496 | 510   | 34597 | AN9288 |
| 2992 | CONTIG172 | 155569 | 156443 | 0.93 | 1.93E-01 | transcription_start_site | - | 156982 | 156982 | 976   | 34603 | AN9289 |
| 2992 | CONTIG172 | 155569 | 156443 | 0.93 | 1.93E-01 | transcription_start_site | - | 157140 | 157140 | 1134  | 34602 | AN9289 |
| 2279 | CONTIG172 | 170257 | 170611 | 1.27 | 5.22E-02 | transcription_start_site | + | 170243 | 170243 | 191   | 34615 | AN9293 |
| 2279 | CONTIG172 | 170257 | 170611 | 1.27 | 5.22E-02 | transcription_start_site | + | 170074 | 170074 | 360   | 34614 | AN9293 |
| 2279 | CONTIG172 | 170257 | 170611 | 1.27 | 5.22E-02 | transcription_start_site | + | 170890 | 170890 | -456  | 34616 | AN9293 |
| 2279 | CONTIG172 | 170257 | 170611 | 1.27 | 5.22E-02 | transcription_start_site | + | 171146 | 171146 | -712  | 34617 | AN9293 |
| 2279 | CONTIG172 | 170257 | 170611 | 1.27 | 5.22E-02 | transcription_start_site | + | 171473 | 171473 | -1039 | 34618 | AN9293 |
| 2279 | CONTIG172 | 170257 | 170611 | 1.27 | 5.22E-02 | transcription_start_site | + | 172819 | 172819 | -2385 | 34619 | AN9294 |
| 2279 | CONTIG172 | 170257 | 170611 | 1.27 | 5.22E-02 | transcription_start_site | + | 173114 | 173114 | -2680 | 34620 | AN9294 |
| 2279 | CONTIG172 | 170257 | 170611 | 1.27 | 5.22E-02 | transcription_start_site | + | 173290 | 173290 | -2856 | 34621 | AN9294 |
| 2279 | CONTIG172 | 170257 | 170611 | 1.27 | 5.22E-02 | transcription_start_site | + | 173594 | 173594 | -3160 | 34622 | AN9294 |
| 2279 | CONTIG172 | 170257 | 170611 | 1.27 | 5.22E-02 | transcription_start_site | + | 174150 | 174150 | -3716 | 34623 | AN9294 |
| 2279 | CONTIG172 | 170257 | 170611 | 1.27 | 5.22E-02 | transcription_start_site | + | 174238 | 174238 | -3804 | 34624 | AN9294 |
| 2279 | CONTIG172 | 170257 | 170611 | 1.27 | 5.22E-02 | transcription_start_site | + | 174609 | 174609 | -4175 | 34625 | AN9294 |
| 2279 | CONTIG172 | 170257 | 170611 | 1.27 | 5.22E-02 | transcription_start_site | + | 174655 | 174655 | -4221 | 34626 | AN9294 |

|      |           |        |        |      |          |                          |   |        |        |       |       |        |
|------|-----------|--------|--------|------|----------|--------------------------|---|--------|--------|-------|-------|--------|
| 393  | CONTIG172 | 176777 | 177216 | 2.61 | 0.00E+00 | transcription_start_site | + | 177680 | 177680 | -683  | 34627 | AN9295 |
| 2403 | CONTIG172 | 177462 | 178341 | 1.23 | 5.88E-02 | transcription_start_site | + | 177680 | 177680 | 221   | 34627 | AN9295 |
| 393  | CONTIG172 | 176777 | 177216 | 2.61 | 0.00E+00 | transcription_start_site | + | 181278 | 181278 | -4281 | 34628 | AN9296 |
| 393  | CONTIG172 | 176777 | 177216 | 2.61 | 0.00E+00 | transcription_start_site | + | 181761 | 181761 | -4764 | 34629 | AN9296 |
| 2403 | CONTIG172 | 177462 | 178341 | 1.23 | 5.88E-02 | transcription_start_site | + | 181278 | 181278 | -3376 | 34628 | AN9296 |
| 2403 | CONTIG172 | 177462 | 178341 | 1.23 | 5.88E-02 | transcription_start_site | + | 181761 | 181761 | -3859 | 34629 | AN9296 |
| 2403 | CONTIG172 | 177462 | 178341 | 1.23 | 5.88E-02 | transcription_start_site | + | 182859 | 182859 | -4957 | 34630 | AN9296 |
| 1612 | CONTIG172 | 185193 | 185545 | 1.53 | 7.16E-03 | transcription_start_site | + | 185594 | 185594 | -225  | 34631 | AN9297 |
| 1612 | CONTIG172 | 185193 | 185545 | 1.53 | 7.16E-03 | transcription_start_site | + | 186354 | 186354 | -985  | 34632 | AN9297 |
| 1103 | CONTIG172 | 190964 | 191231 | 1.83 | 3.61E-03 | transcription_start_site | + | 189999 | 189999 | 1098  | 34635 | AN9298 |
| 1612 | CONTIG172 | 185193 | 185545 | 1.53 | 7.16E-03 | transcription_start_site | + | 189431 | 189431 | -4062 | 34633 | AN9298 |
| 1612 | CONTIG172 | 185193 | 185545 | 1.53 | 7.16E-03 | transcription_start_site | + | 189556 | 189556 | -4187 | 34634 | AN9298 |
| 1612 | CONTIG172 | 185193 | 185545 | 1.53 | 7.16E-03 | transcription_start_site | + | 189999 | 189999 | -4630 | 34635 | AN9298 |
| 2954 | CONTIG172 | 205066 | 205343 | 0.97 | 1.66E-01 | transcription_start_site | - | 203360 | 203360 | -1844 | 34647 | AN9302 |
| 2954 | CONTIG172 | 205066 | 205343 | 0.97 | 1.66E-01 | transcription_start_site | - | 201765 | 201765 | -3439 | 34648 | AN9302 |
| 2954 | CONTIG172 | 205066 | 205343 | 0.97 | 1.66E-01 | transcription_start_site | - | 201615 | 201615 | -3589 | 34649 | AN9302 |
| 2954 | CONTIG172 | 205066 | 205343 | 0.97 | 1.66E-01 | transcription_start_site | - | 201333 | 201333 | -3871 | 34650 | AN9302 |
| 2954 | CONTIG172 | 205066 | 205343 | 0.97 | 1.66E-01 | transcription_start_site | - | 200876 | 200876 | -4328 | 34651 | AN9302 |
| 2705 | CONTIG172 | 208444 | 209158 | 1.12 | 9.24E-02 | transcription_start_site | - | 205065 | 205065 | -3736 | 34652 | AN9303 |
| 2705 | CONTIG172 | 208444 | 209158 | 1.12 | 9.24E-02 | transcription_start_site | - | 204170 | 204170 | -4631 | 34653 | AN9303 |
| 2954 | CONTIG172 | 205066 | 205343 | 0.97 | 1.66E-01 | transcription_start_site | - | 205065 | 205065 | -139  | 34652 | AN9303 |
| 2954 | CONTIG172 | 205066 | 205343 | 0.97 | 1.66E-01 | transcription_start_site | - | 204170 | 204170 | -1034 | 34653 | AN9303 |
| 2954 | CONTIG172 | 205066 | 205343 | 0.97 | 1.66E-01 | transcription_start_site | + | 207232 | 207232 | -2027 | 34654 | AN9304 |
| 2954 | CONTIG172 | 205066 | 205343 | 0.97 | 1.66E-01 | transcription_start_site | + | 207346 | 207346 | -2141 | 34655 | AN9304 |
| 2698 | CONTIG172 | 213155 | 214629 | 1.12 | 5.02E-02 | transcription_start_site | - | 209800 | 209800 | -4092 | 34656 | AN9305 |
| 2698 | CONTIG172 | 213155 | 214629 | 1.12 | 5.02E-02 | transcription_start_site | - | 209499 | 209499 | -4393 | 34657 | AN9305 |
| 2698 | CONTIG172 | 213155 | 214629 | 1.12 | 5.02E-02 | transcription_start_site | - | 208712 | 208712 | -5180 | 34658 | AN9305 |
| 2705 | CONTIG172 | 208444 | 209158 | 1.12 | 9.24E-02 | transcription_start_site | - | 208712 | 208712 | -89   | 34658 | AN9305 |
| 2705 | CONTIG172 | 208444 | 209158 | 1.12 | 9.24E-02 | transcription_start_site | - | 209499 | 209499 | 698   | 34657 | AN9305 |
| 2705 | CONTIG172 | 208444 | 209158 | 1.12 | 9.24E-02 | transcription_start_site | - | 209800 | 209800 | 999   | 34656 | AN9305 |
| 2705 | CONTIG172 | 208444 | 209158 | 1.12 | 9.24E-02 | transcription_start_site | + | 210454 | 210454 | -1653 | 34659 | AN9306 |
| 2705 | CONTIG172 | 208444 | 209158 | 1.12 | 9.24E-02 | transcription_start_site | + | 210711 | 210711 | -1910 | 34660 | AN9306 |
| 2705 | CONTIG172 | 208444 | 209158 | 1.12 | 9.24E-02 | transcription_start_site | + | 210919 | 210919 | -2118 | 34661 | AN9306 |
| 2705 | CONTIG172 | 208444 | 209158 | 1.12 | 9.24E-02 | transcription_start_site | + | 211367 | 211367 | -2566 | 34662 | AN9306 |
| 2698 | CONTIG172 | 213155 | 214629 | 1.12 | 5.02E-02 | transcription_start_site | + | 212540 | 212540 | 1352  | 34664 | AN9307 |
| 2698 | CONTIG172 | 213155 | 214629 | 1.12 | 5.02E-02 | transcription_start_site | + | 212238 | 212238 | 1654  | 34663 | AN9307 |
| 2705 | CONTIG172 | 208444 | 209158 | 1.12 | 9.24E-02 | transcription_start_site | + | 212238 | 212238 | -3437 | 34663 | AN9307 |
| 2705 | CONTIG172 | 208444 | 209158 | 1.12 | 9.24E-02 | transcription_start_site | + | 212540 | 212540 | -3739 | 34664 | AN9307 |
| 2698 | CONTIG172 | 213155 | 214629 | 1.12 | 5.02E-02 | transcription_start_site | + | 213802 | 213802 | 90    | 34666 | AN9308 |
| 2698 | CONTIG172 | 213155 | 214629 | 1.12 | 5.02E-02 | transcription_start_site | + | 213560 | 213560 | 332   | 34665 | AN9308 |
| 2698 | CONTIG172 | 213155 | 214629 | 1.12 | 5.02E-02 | transcription_start_site | + | 215042 | 215042 | -1150 | 34667 | AN9308 |
| 2705 | CONTIG172 | 208444 | 209158 | 1.12 | 9.24E-02 | transcription_start_site | + | 213560 | 213560 | -4759 | 34665 | AN9308 |
| 2705 | CONTIG172 | 208444 | 209158 | 1.12 | 9.24E-02 | transcription_start_site | + | 213802 | 213802 | -5001 | 34666 | AN9308 |
| 2698 | CONTIG172 | 213155 | 214629 | 1.12 | 5.02E-02 | transcription_start_site | - | 215586 | 215586 | 1694  | 34670 | AN9309 |
| 2890 | CONTIG172 | 218635 | 218979 | 1.01 | 1.44E-01 | transcription_start_site | - | 216884 | 216884 | -1923 | 34668 | AN9309 |
| 2890 | CONTIG172 | 218635 | 218979 | 1.01 | 1.44E-01 | transcription_start_site | - | 216363 | 216363 | -2444 | 34669 | AN9309 |
| 2890 | CONTIG172 | 218635 | 218979 | 1.01 | 1.44E-01 | transcription_start_site | - | 215586 | 215586 | -3221 | 34670 | AN9309 |
| 2698 | CONTIG172 | 213155 | 214629 | 1.12 | 5.02E-02 | transcription_start_site | + | 218654 | 218654 | -4762 | 34671 | AN9310 |
| 2698 | CONTIG172 | 213155 | 214629 | 1.12 | 5.02E-02 | transcription_start_site | + | 219400 | 219400 | -5508 | 34672 | AN9310 |
| 2890 | CONTIG172 | 218635 | 218979 | 1.01 | 1.44E-01 | transcription_start_site | + | 218654 | 218654 | 153   | 34671 | AN9310 |
| 2890 | CONTIG172 | 218635 | 218979 | 1.01 | 1.44E-01 | transcription_start_site | + | 219400 | 219400 | -593  | 34672 | AN9310 |
| 2891 | CONTIG172 | 231158 | 231577 | 1.01 | 1.44E-01 | transcription_start_site | - | 226410 | 226410 | -4957 | 34678 | AN9313 |
| 2891 | CONTIG172 | 231158 | 231577 | 1.01 | 1.44E-01 | transcription_start_site | + | 231276 | 231276 | 91    | 34686 | AN9315 |
| 2891 | CONTIG172 | 231158 | 231577 | 1.01 | 1.44E-01 | transcription_start_site | + | 235988 | 235988 | -4620 | 34692 | AN9317 |
| 2891 | CONTIG172 | 231158 | 231577 | 1.01 | 1.44E-01 | transcription_start_site | + | 236259 | 236259 | -4891 | 34693 | AN9317 |
| 2993 | CONTIG172 | 252083 | 252367 | 0.93 | 1.93E-01 | transcription_start_site | - | 247631 | 247631 | -4594 | 34710 | AN9320 |
| 2993 | CONTIG172 | 252083 | 252367 | 0.93 | 1.93E-01 | transcription_start_site | - | 252214 | 252214 | -11   | 34718 | AN9322 |

|      |           |        |        |      |          |                          |   |        |        |       |       |        |
|------|-----------|--------|--------|------|----------|--------------------------|---|--------|--------|-------|-------|--------|
| 2993 | CONTIG172 | 252083 | 252367 | 0.93 | 1.93E-01 | transcription_start_site | - | 251888 | 251888 | -337  | 34719 | AN9322 |
| 2993 | CONTIG172 | 252083 | 252367 | 0.93 | 1.93E-01 | transcription_start_site | - | 253211 | 253211 | 986   | 34726 | AN9323 |
| 2500 | CONTIG172 | 280068 | 280417 | 1.2  | 6.84E-02 | transcription_start_site | - | 278578 | 278578 | -1664 | 34734 | AN9329 |
| 2500 | CONTIG172 | 280068 | 280417 | 1.2  | 6.84E-02 | transcription_start_site | - | 278037 | 278037 | -2205 | 34735 | AN9329 |
| 2500 | CONTIG172 | 280068 | 280417 | 1.2  | 6.84E-02 | transcription_start_site | - | 277692 | 277692 | -2550 | 34736 | AN9329 |
| 2500 | CONTIG172 | 280068 | 280417 | 1.2  | 6.84E-02 | transcription_start_site | - | 277364 | 277364 | -2878 | 34737 | AN9329 |
| 2500 | CONTIG172 | 280068 | 280417 | 1.2  | 6.84E-02 | transcription_start_site | - | 277162 | 277162 | -3080 | 34738 | AN9329 |
| 2500 | CONTIG172 | 280068 | 280417 | 1.2  | 6.84E-02 | transcription_start_site | - | 277047 | 277047 | -3195 | 34739 | AN9329 |
| 2500 | CONTIG172 | 280068 | 280417 | 1.2  | 6.84E-02 | transcription_start_site | - | 276231 | 276231 | -4011 | 34740 | AN9329 |
| 2500 | CONTIG172 | 280068 | 280417 | 1.2  | 6.84E-02 | transcription_start_site | + | 279953 | 279953 | 289   | 34741 | AN9330 |
| 2500 | CONTIG172 | 280068 | 280417 | 1.2  | 6.84E-02 | transcription_start_site | - | 281219 | 281219 | 976   | 34746 | AN9331 |
| 174  | CONTIG172 | 311854 | 312203 | 2.99 | 0.00E+00 | transcription_start_site | - | 306929 | 306929 | -5099 | 34769 | AN9339 |
| 2404 | CONTIG172 | 306159 | 306653 | 1.23 | 5.88E-02 | transcription_start_site | - | 306593 | 306593 | 187   | 34770 | AN9339 |
| 2404 | CONTIG172 | 306159 | 306653 | 1.23 | 5.88E-02 | transcription_start_site | - | 305898 | 305898 | -508  | 34771 | AN9339 |
| 2404 | CONTIG172 | 306159 | 306653 | 1.23 | 5.88E-02 | transcription_start_site | - | 306929 | 306929 | 523   | 34769 | AN9339 |
| 2404 | CONTIG172 | 306159 | 306653 | 1.23 | 5.88E-02 | transcription_start_site | - | 305676 | 305676 | -730  | 34772 | AN9339 |
| 2404 | CONTIG172 | 306159 | 306653 | 1.23 | 5.88E-02 | transcription_start_site | - | 305566 | 305566 | -840  | 34773 | AN9339 |
| 2602 | CONTIG172 | 308709 | 309213 | 1.16 | 8.01E-02 | transcription_start_site | - | 306929 | 306929 | -2032 | 34769 | AN9339 |
| 2602 | CONTIG172 | 308709 | 309213 | 1.16 | 8.01E-02 | transcription_start_site | - | 306593 | 306593 | -2368 | 34770 | AN9339 |
| 2602 | CONTIG172 | 308709 | 309213 | 1.16 | 8.01E-02 | transcription_start_site | - | 305898 | 305898 | -3063 | 34771 | AN9339 |
| 2602 | CONTIG172 | 308709 | 309213 | 1.16 | 8.01E-02 | transcription_start_site | - | 305676 | 305676 | -3285 | 34772 | AN9339 |
| 2602 | CONTIG172 | 308709 | 309213 | 1.16 | 8.01E-02 | transcription_start_site | - | 305566 | 305566 | -3395 | 34773 | AN9339 |
| 174  | CONTIG172 | 311854 | 312203 | 2.99 | 0.00E+00 | transcription_start_site | - | 311389 | 311389 | -639  | 34774 | AN9340 |
| 174  | CONTIG172 | 311854 | 312203 | 2.99 | 0.00E+00 | transcription_start_site | - | 309750 | 309750 | -2278 | 34775 | AN9340 |
| 2602 | CONTIG172 | 308709 | 309213 | 1.16 | 8.01E-02 | transcription_start_site | - | 309750 | 309750 | 789   | 34775 | AN9340 |
| 174  | CONTIG172 | 311854 | 312203 | 2.99 | 0.00E+00 | transcription_start_site | + | 316901 | 316901 | -4872 | 34776 | AN9341 |
| 174  | CONTIG172 | 311854 | 312203 | 2.99 | 0.00E+00 | transcription_start_site | + | 317112 | 317112 | -5083 | 34777 | AN9341 |
| 2405 | CONTIG172 | 337959 | 338243 | 1.23 | 5.88E-02 | transcription_start_site | - | 337911 | 337911 | -190  | 34790 | AN9344 |
| 2405 | CONTIG172 | 337959 | 338243 | 1.23 | 5.88E-02 | transcription_start_site | - | 337247 | 337247 | -854  | 34791 | AN9344 |
| 2405 | CONTIG172 | 337959 | 338243 | 1.23 | 5.88E-02 | transcription_start_site | - | 336725 | 336725 | -1376 | 34792 | AN9344 |
| 2405 | CONTIG172 | 337959 | 338243 | 1.23 | 5.88E-02 | transcription_start_site | - | 336571 | 336571 | -1530 | 34793 | AN9344 |
| 2405 | CONTIG172 | 337959 | 338243 | 1.23 | 5.88E-02 | transcription_start_site | - | 336017 | 336017 | -2084 | 34794 | AN9344 |
| 2405 | CONTIG172 | 337959 | 338243 | 1.23 | 5.88E-02 | transcription_start_site | - | 334958 | 334958 | -3143 | 34795 | AN9344 |
| 2405 | CONTIG172 | 337959 | 338243 | 1.23 | 5.88E-02 | transcription_start_site | - | 334336 | 334336 | -3765 | 34796 | AN9344 |
| 2405 | CONTIG172 | 337959 | 338243 | 1.23 | 5.88E-02 | transcription_start_site | - | 333896 | 333896 | -4205 | 34797 | AN9344 |
| 2405 | CONTIG172 | 337959 | 338243 | 1.23 | 5.88E-02 | transcription_start_site | - | 333653 | 333653 | -4448 | 34798 | AN9344 |
| 2405 | CONTIG172 | 337959 | 338243 | 1.23 | 5.88E-02 | transcription_start_site | - | 333331 | 333331 | -4770 | 34799 | AN9344 |
| 2405 | CONTIG172 | 337959 | 338243 | 1.23 | 5.88E-02 | transcription_start_site | - | 339170 | 339170 | 1069  | 34802 | AN9345 |
| 2603 | CONTIG172 | 343429 | 343713 | 1.16 | 8.01E-02 | transcription_start_site | - | 340604 | 340604 | -2967 | 34800 | AN9345 |
| 2603 | CONTIG172 | 343429 | 343713 | 1.16 | 8.01E-02 | transcription_start_site | - | 339271 | 339271 | -4300 | 34801 | AN9345 |
| 2603 | CONTIG172 | 343429 | 343713 | 1.16 | 8.01E-02 | transcription_start_site | - | 339170 | 339170 | -4401 | 34802 | AN9345 |
| 2405 | CONTIG172 | 337959 | 338243 | 1.23 | 5.88E-02 | transcription_start_site | + | 341043 | 341043 | -2942 | 34803 | AN9346 |
| 2405 | CONTIG172 | 337959 | 338243 | 1.23 | 5.88E-02 | transcription_start_site | + | 341427 | 341427 | -3326 | 34804 | AN9346 |
| 2405 | CONTIG172 | 337959 | 338243 | 1.23 | 5.88E-02 | transcription_start_site | + | 341787 | 341787 | -3686 | 34805 | AN9346 |
| 2405 | CONTIG172 | 337959 | 338243 | 1.23 | 5.88E-02 | transcription_start_site | + | 341951 | 341951 | -3850 | 34806 | AN9346 |
| 2405 | CONTIG172 | 337959 | 338243 | 1.23 | 5.88E-02 | transcription_start_site | + | 342441 | 342441 | -4340 | 34807 | AN9346 |
| 2603 | CONTIG172 | 343429 | 343713 | 1.16 | 8.01E-02 | transcription_start_site | + | 342441 | 342441 | 1130  | 34807 | AN9346 |
| 2603 | CONTIG172 | 343429 | 343713 | 1.16 | 8.01E-02 | transcription_start_site | + | 343694 | 343694 | -123  | 34808 | AN9347 |
| 2603 | CONTIG172 | 343429 | 343713 | 1.16 | 8.01E-02 | transcription_start_site | + | 344029 | 344029 | -458  | 34809 | AN9347 |
| 2501 | CONTIG172 | 371479 | 371758 | 1.2  | 6.84E-02 | transcription_start_site | - | 367584 | 367584 | -4034 | 34829 | AN9353 |
| 2501 | CONTIG172 | 371479 | 371758 | 1.2  | 6.84E-02 | transcription_start_site | - | 367300 | 367300 | -4318 | 34830 | AN9353 |
| 2501 | CONTIG172 | 371479 | 371758 | 1.2  | 6.84E-02 | transcription_start_site | - | 370157 | 370157 | -1461 | 34833 | AN9355 |
| 2501 | CONTIG172 | 371479 | 371758 | 1.2  | 6.84E-02 | transcription_start_site | - | 369739 | 369739 | -1879 | 34834 | AN9355 |
| 2501 | CONTIG172 | 371479 | 371758 | 1.2  | 6.84E-02 | transcription_start_site | - | 369377 | 369377 | -2241 | 34835 | AN9355 |
| 2501 | CONTIG172 | 371479 | 371758 | 1.2  | 6.84E-02 | transcription_start_site | - | 371431 | 371431 | -187  | 34837 | AN9356 |
| 2501 | CONTIG172 | 371479 | 371758 | 1.2  | 6.84E-02 | transcription_start_site | - | 371942 | 371942 | 323   | 34836 | AN9356 |
| 2501 | CONTIG172 | 371479 | 371758 | 1.2  | 6.84E-02 | transcription_start_site | + | 373132 | 373132 | -1513 | 34838 | AN9357 |



|      |           |        |        |      |          |                          |   |        |        |       |       |        |
|------|-----------|--------|--------|------|----------|--------------------------|---|--------|--------|-------|-------|--------|
| 2501 | CONTIG172 | 371479 | 371758 | 1.2  | 6.84E-02 | transcription_start_site | + | 373225 | 373225 | -1606 | 34839 | AN9357 |
| 2501 | CONTIG172 | 371479 | 371758 | 1.2  | 6.84E-02 | transcription_start_site | + | 373940 | 373940 | -2321 | 34840 | AN9357 |
| 2501 | CONTIG172 | 371479 | 371758 | 1.2  | 6.84E-02 | transcription_start_site | + | 374748 | 374748 | -3129 | 34841 | AN9358 |
| 2501 | CONTIG172 | 371479 | 371758 | 1.2  | 6.84E-02 | transcription_start_site | + | 374822 | 374822 | -3203 | 34842 | AN9358 |
| 2501 | CONTIG172 | 371479 | 371758 | 1.2  | 6.84E-02 | transcription_start_site | + | 374926 | 374926 | -3307 | 34843 | AN9358 |
| 2501 | CONTIG172 | 371479 | 371758 | 1.2  | 6.84E-02 | transcription_start_site | + | 375246 | 375246 | -3627 | 34844 | AN9358 |
| 2072 | CONTIG172 | 377407 | 377686 | 1.34 | 3.70E-02 | transcription_start_site | + | 377440 | 377440 | 106   | 34847 | AN9359 |
| 2501 | CONTIG172 | 371479 | 371758 | 1.2  | 6.84E-02 | transcription_start_site | + | 375882 | 375882 | -4263 | 34845 | AN9359 |
| 2501 | CONTIG172 | 371479 | 371758 | 1.2  | 6.84E-02 | transcription_start_site | + | 375969 | 375969 | -4350 | 34846 | AN9359 |
| 2072 | CONTIG172 | 377407 | 377686 | 1.34 | 3.70E-02 | transcription_start_site | + | 378401 | 378401 | -854  | 34848 | AN9360 |
| 2072 | CONTIG172 | 377407 | 377686 | 1.34 | 3.70E-02 | transcription_start_site | + | 378515 | 378515 | -968  | 34849 | AN9360 |
| 2072 | CONTIG172 | 377407 | 377686 | 1.34 | 3.70E-02 | transcription_start_site | + | 378653 | 378653 | -1106 | 34850 | AN9360 |
| 2072 | CONTIG172 | 377407 | 377686 | 1.34 | 3.70E-02 | transcription_start_site | + | 378896 | 378896 | -1349 | 34851 | AN9360 |
| 2072 | CONTIG172 | 377407 | 377686 | 1.34 | 3.70E-02 | transcription_start_site | + | 380423 | 380423 | -2876 | 34852 | AN9361 |
| 2072 | CONTIG172 | 377407 | 377686 | 1.34 | 3.70E-02 | transcription_start_site | + | 380785 | 380785 | -3238 | 34853 | AN9361 |
| 2604 | CONTIG172 | 381903 | 382192 | 1.16 | 8.01E-02 | transcription_start_site | + | 383964 | 383964 | -1916 | 34854 | AN9362 |
| 2604 | CONTIG172 | 381903 | 382192 | 1.16 | 8.01E-02 | transcription_start_site | + | 384319 | 384319 | -2271 | 34855 | AN9362 |
| 1713 | CONTIG172 | 403726 | 404376 | 1.49 | 3.45E-03 | transcription_start_site | + | 403439 | 403439 | 612   | 34876 | AN9370 |
| 1713 | CONTIG172 | 403726 | 404376 | 1.49 | 3.45E-03 | transcription_start_site | + | 403003 | 403003 | 1048  | 34875 | AN9370 |
| 534  | CONTIG172 | 427209 | 427493 | 2.39 | 0.00E+00 | transcription_start_site | + | 428573 | 428573 | -1222 | 34886 | AN9377 |
| 2777 | CONTIG172 | 428704 | 429133 | 1.08 | 1.08E-01 | transcription_start_site | + | 428573 | 428573 | 345   | 34886 | AN9377 |
| 534  | CONTIG172 | 427209 | 427493 | 2.39 | 0.00E+00 | transcription_start_site | + | 430158 | 430158 | -2807 | 34887 | AN9378 |
| 534  | CONTIG172 | 427209 | 427493 | 2.39 | 0.00E+00 | transcription_start_site | + | 430500 | 430500 | -3149 | 34888 | AN9378 |
| 534  | CONTIG172 | 427209 | 427493 | 2.39 | 0.00E+00 | transcription_start_site | + | 430741 | 430741 | -3390 | 34889 | AN9378 |
| 2777 | CONTIG172 | 428704 | 429133 | 1.08 | 1.08E-01 | transcription_start_site | + | 430158 | 430158 | -1239 | 34887 | AN9378 |
| 2777 | CONTIG172 | 428704 | 429133 | 1.08 | 1.08E-01 | transcription_start_site | + | 430500 | 430500 | -1581 | 34888 | AN9378 |
| 2777 | CONTIG172 | 428704 | 429133 | 1.08 | 1.08E-01 | transcription_start_site | + | 430741 | 430741 | -1822 | 34889 | AN9378 |
| 2777 | CONTIG172 | 428704 | 429133 | 1.08 | 1.08E-01 | transcription_start_site | + | 433471 | 433471 | -4552 | 34890 | AN9379 |
| 2777 | CONTIG172 | 428704 | 429133 | 1.08 | 1.08E-01 | transcription_start_site | + | 433883 | 433883 | -4964 | 34891 | AN9379 |
| 2777 | CONTIG172 | 428704 | 429133 | 1.08 | 1.08E-01 | transcription_start_site | + | 434020 | 434020 | -5101 | 34892 | AN9379 |
| 2154 | CONTIG172 | 447530 | 448115 | 1.31 | 2.64E-02 | transcription_start_site | - | 445538 | 445538 | -2284 | 34905 | AN9383 |
| 2154 | CONTIG172 | 447530 | 448115 | 1.31 | 2.64E-02 | transcription_start_site | - | 444872 | 444872 | -2950 | 34906 | AN9383 |
| 2154 | CONTIG172 | 447530 | 448115 | 1.31 | 2.64E-02 | transcription_start_site | - | 444396 | 444396 | -3426 | 34907 | AN9383 |
| 2154 | CONTIG172 | 447530 | 448115 | 1.31 | 2.64E-02 | transcription_start_site | - | 447519 | 447519 | -303  | 34908 | AN9384 |
| 2154 | CONTIG172 | 447530 | 448115 | 1.31 | 2.64E-02 | transcription_start_site | - | 446347 | 446347 | -1475 | 34909 | AN9384 |
| 394  | CONTIG172 | 457426 | 458075 | 2.61 | 0.00E+00 | transcription_start_site | + | 458527 | 458527 | -776  | 34913 | AN9386 |
| 394  | CONTIG172 | 457426 | 458075 | 2.61 | 0.00E+00 | transcription_start_site | + | 458821 | 458821 | -1070 | 34914 | AN9386 |
| 394  | CONTIG172 | 457426 | 458075 | 2.61 | 0.00E+00 | transcription_start_site | + | 459381 | 459381 | -1630 | 34915 | AN9386 |
| 394  | CONTIG172 | 457426 | 458075 | 2.61 | 0.00E+00 | transcription_start_site | + | 459731 | 459731 | -1980 | 34916 | AN9386 |
| 725  | CONTIG172 | 459606 | 459950 | 2.17 | 0.00E+00 | transcription_start_site | + | 459731 | 459731 | 47    | 34916 | AN9386 |
| 725  | CONTIG172 | 459606 | 459950 | 2.17 | 0.00E+00 | transcription_start_site | + | 459381 | 459381 | 397   | 34915 | AN9386 |
| 725  | CONTIG172 | 459606 | 459950 | 2.17 | 0.00E+00 | transcription_start_site | + | 458821 | 458821 | 957   | 34914 | AN9386 |
| 725  | CONTIG172 | 459606 | 459950 | 2.17 | 0.00E+00 | transcription_start_site | - | 460734 | 460734 | 956   | 34920 | AN9387 |
| 394  | CONTIG172 | 457426 | 458075 | 2.61 | 0.00E+00 | transcription_start_site | + | 462637 | 462637 | -4886 | 34921 | AN9388 |
| 394  | CONTIG172 | 457426 | 458075 | 2.61 | 0.00E+00 | transcription_start_site | + | 462794 | 462794 | -5043 | 34922 | AN9388 |
| 394  | CONTIG172 | 457426 | 458075 | 2.61 | 0.00E+00 | transcription_start_site | + | 463013 | 463013 | -5262 | 34923 | AN9388 |
| 725  | CONTIG172 | 459606 | 459950 | 2.17 | 0.00E+00 | transcription_start_site | + | 462637 | 462637 | -2859 | 34921 | AN9388 |
| 725  | CONTIG172 | 459606 | 459950 | 2.17 | 0.00E+00 | transcription_start_site | + | 462794 | 462794 | -3016 | 34922 | AN9388 |
| 725  | CONTIG172 | 459606 | 459950 | 2.17 | 0.00E+00 | transcription_start_site | + | 463013 | 463013 | -3235 | 34923 | AN9388 |
| 725  | CONTIG172 | 459606 | 459950 | 2.17 | 0.00E+00 | transcription_start_site | + | 463161 | 463161 | -3383 | 34924 | AN9388 |
| 2502 | CONTIG172 | 472220 | 472709 | 1.2  | 6.84E-02 | transcription_start_site | - | 468877 | 468877 | -3587 | 34925 | AN9389 |
| 2502 | CONTIG172 | 472220 | 472709 | 1.2  | 6.84E-02 | transcription_start_site | - | 467629 | 467629 | -4835 | 34926 | AN9389 |
| 2887 | CONTIG172 | 467785 | 468364 | 1.01 | 1.33E-01 | transcription_start_site | - | 467629 | 467629 | -445  | 34926 | AN9389 |
| 2887 | CONTIG172 | 467785 | 468364 | 1.01 | 1.33E-01 | transcription_start_site | - | 468877 | 468877 | 802   | 34925 | AN9389 |
| 2502 | CONTIG172 | 472220 | 472709 | 1.2  | 6.84E-02 | transcription_start_site | + | 473110 | 473110 | -645  | 34932 | AN9390 |
| 2887 | CONTIG172 | 467785 | 468364 | 1.01 | 1.33E-01 | transcription_start_site | + | 469761 | 469761 | -1686 | 34927 | AN9390 |
| 2887 | CONTIG172 | 467785 | 468364 | 1.01 | 1.33E-01 | transcription_start_site | + | 469972 | 469972 | -1897 | 34928 | AN9390 |

|      |           |        |        |      |          |                          |   |        |        |       |       |        |
|------|-----------|--------|--------|------|----------|--------------------------|---|--------|--------|-------|-------|--------|
| 2887 | CONTIG172 | 467785 | 468364 | 1.01 | 1.33E-01 | transcription_start_site | + | 470319 | 470319 | -2244 | 34929 | AN9390 |
| 2887 | CONTIG172 | 467785 | 468364 | 1.01 | 1.33E-01 | transcription_start_site | + | 470537 | 470537 | -2462 | 34930 | AN9390 |
| 2887 | CONTIG172 | 467785 | 468364 | 1.01 | 1.33E-01 | transcription_start_site | + | 470751 | 470751 | -2676 | 34931 | AN9390 |
| 2887 | CONTIG172 | 467785 | 468364 | 1.01 | 1.33E-01 | transcription_start_site | + | 473110 | 473110 | -5035 | 34932 | AN9390 |
| 853  | CONTIG172 | 474695 | 475051 | 2.05 | 1.01E-03 | transcription_start_site | - | 474751 | 474751 | -122  | 34933 | AN9391 |
| 853  | CONTIG172 | 474695 | 475051 | 2.05 | 1.01E-03 | transcription_start_site | + | 475104 | 475104 | -231  | 34934 | AN9392 |
| 853  | CONTIG172 | 474695 | 475051 | 2.05 | 1.01E-03 | transcription_start_site | + | 475381 | 475381 | -508  | 34935 | AN9392 |
| 853  | CONTIG172 | 474695 | 475051 | 2.05 | 1.01E-03 | transcription_start_site | + | 475849 | 475849 | -976  | 34936 | AN9392 |
| 853  | CONTIG172 | 474695 | 475051 | 2.05 | 1.01E-03 | transcription_start_site | + | 476055 | 476055 | -1182 | 34937 | AN9392 |
| 853  | CONTIG172 | 474695 | 475051 | 2.05 | 1.01E-03 | transcription_start_site | + | 476277 | 476277 | -1404 | 34938 | AN9392 |
| 853  | CONTIG172 | 474695 | 475051 | 2.05 | 1.01E-03 | transcription_start_site | + | 476426 | 476426 | -1553 | 34939 | AN9392 |
| 853  | CONTIG172 | 474695 | 475051 | 2.05 | 1.01E-03 | transcription_start_site | + | 476561 | 476561 | -1688 | 34940 | AN9392 |
| 853  | CONTIG172 | 474695 | 475051 | 2.05 | 1.01E-03 | transcription_start_site | + | 476738 | 476738 | -1865 | 34941 | AN9392 |
| 853  | CONTIG172 | 474695 | 475051 | 2.05 | 1.01E-03 | transcription_start_site | + | 476924 | 476924 | -2051 | 34942 | AN9392 |
| 853  | CONTIG172 | 474695 | 475051 | 2.05 | 1.01E-03 | transcription_start_site | + | 477061 | 477061 | -2188 | 34943 | AN9392 |
| 853  | CONTIG172 | 474695 | 475051 | 2.05 | 1.01E-03 | transcription_start_site | + | 477402 | 477402 | -2529 | 34944 | AN9392 |
| 853  | CONTIG172 | 474695 | 475051 | 2.05 | 1.01E-03 | transcription_start_site | + | 477535 | 477535 | -2662 | 34945 | AN9392 |
| 2502 | CONTIG172 | 472220 | 472709 | 1.2  | 6.84E-02 | transcription_start_site | + | 475104 | 475104 | -2639 | 34934 | AN9392 |
| 2502 | CONTIG172 | 472220 | 472709 | 1.2  | 6.84E-02 | transcription_start_site | + | 475381 | 475381 | -2916 | 34935 | AN9392 |
| 2502 | CONTIG172 | 472220 | 472709 | 1.2  | 6.84E-02 | transcription_start_site | + | 475849 | 475849 | -3384 | 34936 | AN9392 |
| 2502 | CONTIG172 | 472220 | 472709 | 1.2  | 6.84E-02 | transcription_start_site | + | 476055 | 476055 | -3590 | 34937 | AN9392 |
| 2502 | CONTIG172 | 472220 | 472709 | 1.2  | 6.84E-02 | transcription_start_site | + | 476277 | 476277 | -3812 | 34938 | AN9392 |
| 2502 | CONTIG172 | 472220 | 472709 | 1.2  | 6.84E-02 | transcription_start_site | + | 476426 | 476426 | -3961 | 34939 | AN9392 |
| 2502 | CONTIG172 | 472220 | 472709 | 1.2  | 6.84E-02 | transcription_start_site | + | 476561 | 476561 | -4096 | 34940 | AN9392 |
| 2502 | CONTIG172 | 472220 | 472709 | 1.2  | 6.84E-02 | transcription_start_site | + | 476738 | 476738 | -4273 | 34941 | AN9392 |
| 2502 | CONTIG172 | 472220 | 472709 | 1.2  | 6.84E-02 | transcription_start_site | + | 476924 | 476924 | -4459 | 34942 | AN9392 |
| 2502 | CONTIG172 | 472220 | 472709 | 1.2  | 6.84E-02 | transcription_start_site | + | 477061 | 477061 | -4596 | 34943 | AN9392 |
| 2502 | CONTIG172 | 472220 | 472709 | 1.2  | 6.84E-02 | transcription_start_site | + | 477402 | 477402 | -4937 | 34944 | AN9392 |
| 2502 | CONTIG172 | 472220 | 472709 | 1.2  | 6.84E-02 | transcription_start_site | + | 477535 | 477535 | -5070 | 34945 | AN9392 |
| 853  | CONTIG172 | 474695 | 475051 | 2.05 | 1.01E-03 | transcription_start_site | + | 478157 | 478157 | -3284 | 34946 | AN9393 |
| 853  | CONTIG172 | 474695 | 475051 | 2.05 | 1.01E-03 | transcription_start_site | + | 478619 | 478619 | -3746 | 34947 | AN9393 |
| 853  | CONTIG172 | 474695 | 475051 | 2.05 | 1.01E-03 | transcription_start_site | + | 479169 | 479169 | -4296 | 34948 | AN9393 |
| 1443 | CONTIG172 | 488417 | 489141 | 1.61 | 4.81E-03 | transcription_start_site | - | 484744 | 484744 | -4035 | 34957 | AN9395 |
| 1443 | CONTIG172 | 488417 | 489141 | 1.61 | 4.81E-03 | transcription_start_site | - | 484501 | 484501 | -4278 | 34958 | AN9395 |
| 1443 | CONTIG172 | 488417 | 489141 | 1.61 | 4.81E-03 | transcription_start_site | - | 483947 | 483947 | -4832 | 34959 | AN9395 |
| 1443 | CONTIG172 | 488417 | 489141 | 1.61 | 4.81E-03 | transcription_start_site | - | 486144 | 486144 | -2635 | 34962 | AN9396 |
| 1443 | CONTIG172 | 488417 | 489141 | 1.61 | 4.81E-03 | transcription_start_site | - | 486000 | 486000 | -2779 | 34963 | AN9396 |
| 1443 | CONTIG172 | 488417 | 489141 | 1.61 | 4.81E-03 | transcription_start_site | - | 487968 | 487968 | -811  | 34964 | AN9397 |
| 1443 | CONTIG172 | 488417 | 489141 | 1.61 | 4.81E-03 | transcription_start_site | - | 487686 | 487686 | -1093 | 34965 | AN9397 |
| 1443 | CONTIG172 | 488417 | 489141 | 1.61 | 4.81E-03 | transcription_start_site | + | 491858 | 491858 | -3079 | 34969 | AN9399 |
| 1155 | CONTIG172 | 514370 | 514629 | 1.79 | 4.61E-03 | transcription_start_site | - | 513591 | 513591 | -908  | 34991 | AN9407 |
| 1155 | CONTIG172 | 514370 | 514629 | 1.79 | 4.61E-03 | transcription_start_site | - | 512999 | 512999 | -1500 | 34992 | AN9407 |
| 1155 | CONTIG172 | 514370 | 514629 | 1.79 | 4.61E-03 | transcription_start_site | + | 515196 | 515196 | -696  | 34994 | AN9408 |
| 2914 | CONTIG174 | 16801  | 17080  | 0.99 | 2.62E-02 | transcription_start_site | + | 21536  | 21536  | -4595 | 35016 | AN9416 |
| 2914 | CONTIG174 | 16801  | 17080  | 0.99 | 2.62E-02 | transcription_start_site | + | 21917  | 21917  | -4976 | 35017 | AN9416 |
| 2914 | CONTIG174 | 16801  | 17080  | 0.99 | 2.62E-02 | transcription_start_site | + | 22035  | 22035  | -5094 | 35018 | AN9416 |
| 3031 | CONTIG175 | 8796   | 9880   | 0.84 | 6.16E-02 | transcription_start_site | - | 5186   | 5186   | -4152 | 35021 | AN9418 |
| 3031 | CONTIG175 | 8796   | 9880   | 0.84 | 6.16E-02 | transcription_start_site | - | 4884   | 4884   | -4454 | 35022 | AN9418 |
| 3031 | CONTIG175 | 8796   | 9880   | 0.84 | 6.16E-02 | transcription_start_site | + | 8477   | 8477   | 861   | 35028 | AN9419 |
| 3031 | CONTIG175 | 8796   | 9880   | 0.84 | 6.16E-02 | transcription_start_site | - | 9316   | 9316   | -22   | 35030 | AN9420 |
| 3031 | CONTIG175 | 8796   | 9880   | 0.84 | 6.16E-02 | transcription_start_site | - | 9114   | 9114   | -224  | 35031 | AN9420 |
| 3031 | CONTIG175 | 8796   | 9880   | 0.84 | 6.16E-02 | transcription_start_site | - | 9562   | 9562   | 224   | 35029 | AN9420 |
| 3031 | CONTIG175 | 8796   | 9880   | 0.84 | 6.16E-02 | transcription_start_site | + | 10192  | 10192  | -854  | 35032 | AN9421 |
| 3031 | CONTIG175 | 8796   | 9880   | 0.84 | 6.16E-02 | transcription_start_site | + | 10382  | 10382  | -1044 | 35033 | AN9421 |
| 2980 | CONTIG175 | 15301  | 15803  | 0.93 | 5.22E-02 | transcription_start_site | - | 13442  | 13442  | -2110 | 35034 | AN9422 |
| 2980 | CONTIG175 | 15301  | 15803  | 0.93 | 5.22E-02 | transcription_start_site | - | 13059  | 13059  | -2493 | 35035 | AN9422 |
| 2980 | CONTIG175 | 15301  | 15803  | 0.93 | 5.22E-02 | transcription_start_site | - | 12830  | 12830  | -2722 | 35036 | AN9422 |

|      |           |       |       |      |          |                          |   |       |       |       |       |        |
|------|-----------|-------|-------|------|----------|--------------------------|---|-------|-------|-------|-------|--------|
| 2980 | CONTIG175 | 15301 | 15803 | 0.93 | 5.22E-02 | transcription_start_site | - | 12632 | 12632 | -2920 | 35037 | AN9422 |
| 3063 | CONTIG175 | 17706 | 18140 | 0.68 | 1.93E-01 | transcription_start_site | - | 13442 | 13442 | -4481 | 35034 | AN9422 |
| 3063 | CONTIG175 | 17706 | 18140 | 0.68 | 1.93E-01 | transcription_start_site | - | 13059 | 13059 | -4864 | 35035 | AN9422 |
| 3063 | CONTIG175 | 17706 | 18140 | 0.68 | 1.93E-01 | transcription_start_site | - | 12830 | 12830 | -5093 | 35036 | AN9422 |
| 2980 | CONTIG175 | 15301 | 15803 | 0.93 | 5.22E-02 | transcription_start_site | + | 14805 | 14805 | 747   | 35040 | AN9423 |
| 3031 | CONTIG175 | 8796  | 9880  | 0.84 | 6.16E-02 | transcription_start_site | + | 13939 | 13939 | -4601 | 35038 | AN9423 |
| 3031 | CONTIG175 | 8796  | 9880  | 0.84 | 6.16E-02 | transcription_start_site | + | 14117 | 14117 | -4779 | 35039 | AN9423 |
| 3031 | CONTIG175 | 8796  | 9880  | 0.84 | 6.16E-02 | transcription_start_site | + | 14805 | 14805 | -5467 | 35040 | AN9423 |
| 2980 | CONTIG175 | 15301 | 15803 | 0.93 | 5.22E-02 | transcription_start_site | - | 16765 | 16765 | 1213  | 35044 | AN9424 |
| 3063 | CONTIG175 | 17706 | 18140 | 0.68 | 1.93E-01 | transcription_start_site | - | 17289 | 17289 | -634  | 35041 | AN9424 |
| 3063 | CONTIG175 | 17706 | 18140 | 0.68 | 1.93E-01 | transcription_start_site | - | 17140 | 17140 | -783  | 35042 | AN9424 |
| 3063 | CONTIG175 | 17706 | 18140 | 0.68 | 1.93E-01 | transcription_start_site | - | 16948 | 16948 | -975  | 35043 | AN9424 |
| 3063 | CONTIG175 | 17706 | 18140 | 0.68 | 1.93E-01 | transcription_start_site | - | 16765 | 16765 | -1158 | 35044 | AN9424 |
| 3073 | CONTIG176 | 2791  | 3217  | 0.43 | 1.93E-01 | transcription_start_site | + | 3202  | 3202  | -198  | 35045 | AN9425 |
| 3073 | CONTIG176 | 2791  | 3217  | 0.43 | 1.93E-01 | transcription_start_site | + | 3349  | 3349  | -345  | 35046 | AN9425 |
| 3073 | CONTIG176 | 2791  | 3217  | 0.43 | 1.93E-01 | transcription_start_site | + | 3536  | 3536  | -532  | 35047 | AN9425 |
| 3073 | CONTIG176 | 2791  | 3217  | 0.43 | 1.93E-01 | transcription_start_site | + | 3719  | 3719  | -715  | 35048 | AN9425 |
| 3073 | CONTIG176 | 2791  | 3217  | 0.43 | 1.93E-01 | transcription_start_site | + | 4000  | 4000  | -996  | 35049 | AN9425 |
| 3073 | CONTIG176 | 2791  | 3217  | 0.43 | 1.93E-01 | transcription_start_site | + | 4170  | 4170  | -1166 | 35050 | AN9425 |
| 3069 | CONTIG179 | 3156  | 3445  | 0.63 | 9.24E-02 | transcription_start_site | - | 3614  | 3614  | 313   | 35095 | AN9433 |
| 3038 | CONTIG180 | 9456  | 9820  | 0.8  | 6.84E-02 | transcription_start_site | + | 8837  | 8837  | 801   | 35116 | AN9437 |
| 3038 | CONTIG180 | 9456  | 9820  | 0.8  | 6.84E-02 | transcription_start_site | + | 8487  | 8487  | 1151  | 35115 | AN9437 |
| 3038 | CONTIG180 | 9456  | 9820  | 0.8  | 6.84E-02 | transcription_start_site | + | 9626  | 9626  | 12    | 35117 | AN9438 |
| 3038 | CONTIG180 | 9456  | 9820  | 0.8  | 6.84E-02 | transcription_start_site | + | 9955  | 9955  | -317  | 35118 | AN9438 |
| 3050 | CONTIG181 | 2936  | 3800  | 0.76 | 1.25E-01 | transcription_start_site | + | 3331  | 3331  | 37    | 35121 | AN9439 |
| 3050 | CONTIG181 | 2936  | 3800  | 0.76 | 1.25E-01 | transcription_start_site | + | 3510  | 3510  | -142  | 35122 | AN9439 |
| 3050 | CONTIG181 | 2936  | 3800  | 0.76 | 1.25E-01 | transcription_start_site | + | 3130  | 3130  | 238   | 35120 | AN9439 |
| 3050 | CONTIG181 | 2936  | 3800  | 0.76 | 1.25E-01 | transcription_start_site | + | 2887  | 2887  | 481   | 35119 | AN9439 |
| 3050 | CONTIG181 | 2936  | 3800  | 0.76 | 1.25E-01 | transcription_start_site | + | 7503  | 7503  | -4135 | 35127 | AN9441 |
| 3050 | CONTIG181 | 2936  | 3800  | 0.76 | 1.25E-01 | transcription_start_site | + | 7690  | 7690  | -4322 | 35128 | AN9441 |
| 3050 | CONTIG181 | 2936  | 3800  | 0.76 | 1.25E-01 | transcription_start_site | + | 8409  | 8409  | -5041 | 35129 | AN9441 |
| 146  | CONTIG186 | 2026  | 2395  | 3.06 | 2.49E-03 | transcription_start_site | + | 3116  | 3116  | -905  | 35150 | AN9448 |
| 146  | CONTIG186 | 2026  | 2395  | 3.06 | 2.49E-03 | transcription_start_site | + | 3348  | 3348  | -1137 | 35151 | AN9448 |
| 197  | CONTIG187 | 6992  | 7266  | 2.95 | 1.84E-02 | transcription_start_site | - | 5371  | 5371  | -1758 | 35156 | AN9451 |
| 833  | CONTIG187 | 7817  | 8461  | 2.07 | 1.07E-01 | transcription_start_site | - | 5371  | 5371  | -2768 | 35156 | AN9451 |
| 995  | CONTIG187 | 4352  | 4641  | 1.92 | 1.66E-01 | transcription_start_site | - | 5371  | 5371  | 874   | 35156 | AN9451 |
| 958  | CONTIG189 | 5041  | 5600  | 1.95 | 9.21E-03 | transcription_start_site | - | 2224  | 2224  | -3096 | 35158 | AN9456 |
| 958  | CONTIG189 | 5041  | 5600  | 1.95 | 9.21E-03 | transcription_start_site | - | 2039  | 2039  | -3281 | 35159 | AN9456 |
| 958  | CONTIG189 | 5041  | 5600  | 1.95 | 9.21E-03 | transcription_start_site | - | 1760  | 1760  | -3560 | 35160 | AN9456 |
| 958  | CONTIG189 | 5041  | 5600  | 1.95 | 9.21E-03 | transcription_start_site | - | 1445  | 1445  | -3875 | 35161 | AN9456 |
| 958  | CONTIG189 | 5041  | 5600  | 1.95 | 9.21E-03 | transcription_start_site | - | 1104  | 1104  | -4216 | 35162 | AN9456 |
| 958  | CONTIG189 | 5041  | 5600  | 1.95 | 9.21E-03 | transcription_start_site | - | 710   | 710   | -4610 | 35163 | AN9456 |
| 958  | CONTIG189 | 5041  | 5600  | 1.95 | 9.21E-03 | transcription_start_site | + | 5280  | 5280  | 40    | 35165 | AN9457 |
| 958  | CONTIG189 | 5041  | 5600  | 1.95 | 9.21E-03 | transcription_start_site | + | 6669  | 6669  | -1348 | 35166 | AN9458 |
| 958  | CONTIG189 | 5041  | 5600  | 1.95 | 9.21E-03 | transcription_start_site | + | 6885  | 6885  | -1564 | 35167 | AN9458 |
| 958  | CONTIG189 | 5041  | 5600  | 1.95 | 9.21E-03 | transcription_start_site | + | 7855  | 7855  | -2534 | 35168 | AN9458 |
| 958  | CONTIG189 | 5041  | 5600  | 1.95 | 9.21E-03 | transcription_start_site | + | 8985  | 8985  | -3664 | 35169 | AN9458 |
| 626  | CONTIG190 | 7882  | 8156  | 2.28 | 7.85E-03 | transcription_start_site | - | 3299  | 3299  | -4720 | 35170 | AN9459 |
| 626  | CONTIG190 | 7882  | 8156  | 2.28 | 7.85E-03 | transcription_start_site | - | 7449  | 7449  | -570  | 35176 | AN9461 |
| 626  | CONTIG190 | 7882  | 8156  | 2.28 | 7.85E-03 | transcription_start_site | - | 7269  | 7269  | -750  | 35177 | AN9461 |
| 626  | CONTIG190 | 7882  | 8156  | 2.28 | 7.85E-03 | transcription_start_site | - | 7099  | 7099  | -920  | 35178 | AN9461 |
| 626  | CONTIG190 | 7882  | 8156  | 2.28 | 7.85E-03 | transcription_start_site | - | 6769  | 6769  | -1250 | 35179 | AN9461 |
| 3025 | CONTIG192 | 7296  | 7565  | 0.86 | 5.88E-02 | transcription_start_site | - | 7339  | 7339  | -91   | 35193 | AN9466 |
| 3058 | CONTIG193 | 5251  | 6129  | 0.71 | 8.01E-02 | transcription_start_site | + | 5135  | 5135  | 555   | 35202 | AN9467 |
| 3058 | CONTIG193 | 5251  | 6129  | 0.71 | 8.01E-02 | transcription_start_site | + | 4769  | 4769  | 921   | 35201 | AN9467 |
| 3058 | CONTIG193 | 5251  | 6129  | 0.71 | 8.01E-02 | transcription_start_site | + | 4592  | 4592  | 1098  | 35200 | AN9467 |
| 3058 | CONTIG193 | 5251  | 6129  | 0.71 | 8.01E-02 | transcription_start_site | + | 4365  | 4365  | 1325  | 35199 | AN9467 |

|                |      |      |      |          |                          |   |      |      |       |       |        |
|----------------|------|------|------|----------|--------------------------|---|------|------|-------|-------|--------|
| 2803 CONTIG194 | 1216 | 2163 | 1.06 | 8.01E-02 | transcription_start_site | - | 1837 | 1837 | 147   | 35206 | AN9468 |
| 2803 CONTIG194 | 1216 | 2163 | 1.06 | 8.01E-02 | transcription_start_site | - | 1976 | 1976 | 286   | 35205 | AN9468 |
| 2803 CONTIG194 | 1216 | 2163 | 1.06 | 8.01E-02 | transcription_start_site | - | 2358 | 2358 | 668   | 35204 | AN9468 |
| 2803 CONTIG194 | 1216 | 2163 | 1.06 | 8.01E-02 | transcription_start_site | - | 2476 | 2476 | 786   | 35203 | AN9468 |
| 2804 CONTIG194 | 4821 | 5176 | 1.06 | 8.01E-02 | transcription_start_site | - | 2476 | 2476 | -2522 | 35203 | AN9468 |
| 2804 CONTIG194 | 4821 | 5176 | 1.06 | 8.01E-02 | transcription_start_site | - | 2358 | 2358 | -2640 | 35204 | AN9468 |
| 2804 CONTIG194 | 4821 | 5176 | 1.06 | 8.01E-02 | transcription_start_site | - | 1976 | 1976 | -3022 | 35205 | AN9468 |
| 2804 CONTIG194 | 4821 | 5176 | 1.06 | 8.01E-02 | transcription_start_site | - | 1837 | 1837 | -3161 | 35206 | AN9468 |
| 2858 CONTIG194 | 2721 | 3060 | 1.03 | 7.51E-02 | transcription_start_site | - | 2476 | 2476 | -414  | 35203 | AN9468 |
| 2858 CONTIG194 | 2721 | 3060 | 1.03 | 7.51E-02 | transcription_start_site | - | 2358 | 2358 | -532  | 35204 | AN9468 |
| 2858 CONTIG194 | 2721 | 3060 | 1.03 | 7.51E-02 | transcription_start_site | - | 1976 | 1976 | -914  | 35205 | AN9468 |
| 2858 CONTIG194 | 2721 | 3060 | 1.03 | 7.51E-02 | transcription_start_site | - | 1837 | 1837 | -1053 | 35206 | AN9468 |
| 2803 CONTIG194 | 1216 | 2163 | 1.06 | 8.01E-02 | transcription_start_site | + | 2825 | 2825 | -1135 | 35207 | AN9469 |
| 2803 CONTIG194 | 1216 | 2163 | 1.06 | 8.01E-02 | transcription_start_site | + | 2941 | 2941 | -1251 | 35208 | AN9469 |
| 2803 CONTIG194 | 1216 | 2163 | 1.06 | 8.01E-02 | transcription_start_site | + | 3361 | 3361 | -1671 | 35209 | AN9469 |
| 2858 CONTIG194 | 2721 | 3060 | 1.03 | 7.51E-02 | transcription_start_site | + | 2941 | 2941 | -50   | 35208 | AN9469 |
| 2858 CONTIG194 | 2721 | 3060 | 1.03 | 7.51E-02 | transcription_start_site | + | 2825 | 2825 | 65    | 35207 | AN9469 |
| 2858 CONTIG194 | 2721 | 3060 | 1.03 | 7.51E-02 | transcription_start_site | + | 3361 | 3361 | -470  | 35209 | AN9469 |
| 2804 CONTIG194 | 4821 | 5176 | 1.06 | 8.01E-02 | transcription_start_site | - | 4828 | 4828 | -170  | 35210 | AN9470 |
| 2804 CONTIG194 | 4821 | 5176 | 1.06 | 8.01E-02 | transcription_start_site | - | 4621 | 4621 | -377  | 35211 | AN9470 |
| 2804 CONTIG194 | 4821 | 5176 | 1.06 | 8.01E-02 | transcription_start_site | - | 3920 | 3920 | -1078 | 35212 | AN9470 |
| 2858 CONTIG194 | 2721 | 3060 | 1.03 | 7.51E-02 | transcription_start_site | - | 3920 | 3920 | 1029  | 35212 | AN9470 |
| 2804 CONTIG194 | 4821 | 5176 | 1.06 | 8.01E-02 | transcription_start_site | - | 5838 | 5838 | 839   | 35213 | AN9471 |
| 2803 CONTIG194 | 1216 | 2163 | 1.06 | 8.01E-02 | transcription_start_site | + | 6049 | 6049 | -4359 | 35214 | AN9472 |
| 2803 CONTIG194 | 1216 | 2163 | 1.06 | 8.01E-02 | transcription_start_site | + | 6193 | 6193 | -4503 | 35215 | AN9472 |
| 2803 CONTIG194 | 1216 | 2163 | 1.06 | 8.01E-02 | transcription_start_site | + | 6262 | 6262 | -4572 | 35216 | AN9472 |
| 2803 CONTIG194 | 1216 | 2163 | 1.06 | 8.01E-02 | transcription_start_site | + | 6373 | 6373 | -4683 | 35217 | AN9472 |
| 2803 CONTIG194 | 1216 | 2163 | 1.06 | 8.01E-02 | transcription_start_site | + | 7157 | 7157 | -5467 | 35218 | AN9472 |
| 2804 CONTIG194 | 4821 | 5176 | 1.06 | 8.01E-02 | transcription_start_site | + | 6049 | 6049 | -1050 | 35214 | AN9472 |
| 2804 CONTIG194 | 4821 | 5176 | 1.06 | 8.01E-02 | transcription_start_site | + | 6193 | 6193 | -1194 | 35215 | AN9472 |
| 2804 CONTIG194 | 4821 | 5176 | 1.06 | 8.01E-02 | transcription_start_site | + | 6262 | 6262 | -1263 | 35216 | AN9472 |
| 2804 CONTIG194 | 4821 | 5176 | 1.06 | 8.01E-02 | transcription_start_site | + | 6373 | 6373 | -1374 | 35217 | AN9472 |
| 2804 CONTIG194 | 4821 | 5176 | 1.06 | 8.01E-02 | transcription_start_site | + | 7157 | 7157 | -2158 | 35218 | AN9472 |
| 2804 CONTIG194 | 4821 | 5176 | 1.06 | 8.01E-02 | transcription_start_site | + | 7354 | 7354 | -2355 | 35219 | AN9472 |
| 2858 CONTIG194 | 2721 | 3060 | 1.03 | 7.51E-02 | transcription_start_site | + | 6049 | 6049 | -3158 | 35214 | AN9472 |
| 2858 CONTIG194 | 2721 | 3060 | 1.03 | 7.51E-02 | transcription_start_site | + | 6193 | 6193 | -3302 | 35215 | AN9472 |
| 2858 CONTIG194 | 2721 | 3060 | 1.03 | 7.51E-02 | transcription_start_site | + | 6262 | 6262 | -3371 | 35216 | AN9472 |
| 2858 CONTIG194 | 2721 | 3060 | 1.03 | 7.51E-02 | transcription_start_site | + | 6373 | 6373 | -3482 | 35217 | AN9472 |
| 2858 CONTIG194 | 2721 | 3060 | 1.03 | 7.51E-02 | transcription_start_site | + | 7157 | 7157 | -4266 | 35218 | AN9472 |
| 2858 CONTIG194 | 2721 | 3060 | 1.03 | 7.51E-02 | transcription_start_site | + | 7354 | 7354 | -4463 | 35219 | AN9472 |
| 823 CONTIG195  | 1951 | 3275 | 2.07 | 3.45E-03 | transcription_start_site | + | 3856 | 3856 | -1243 | 35220 | AN9473 |
| 823 CONTIG195  | 1951 | 3275 | 2.07 | 3.45E-03 | transcription_start_site | + | 6294 | 6294 | -3681 | 35221 | AN9474 |
| 823 CONTIG195  | 1951 | 3275 | 2.07 | 3.45E-03 | transcription_start_site | + | 6377 | 6377 | -3764 | 35222 | AN9474 |
| 823 CONTIG195  | 1951 | 3275 | 2.07 | 3.45E-03 | transcription_start_site | + | 6592 | 6592 | -3979 | 35223 | AN9474 |
| 3072 CONTIG196 | 4891 | 5251 | 0.61 | 1.66E-01 | transcription_start_site | + | 4907 | 4907 | 164   | 35232 | AN9476 |
| 3072 CONTIG196 | 4891 | 5251 | 0.61 | 1.66E-01 | transcription_start_site | + | 4763 | 4763 | 308   | 35231 | AN9476 |
| 3072 CONTIG196 | 4891 | 5251 | 0.61 | 1.66E-01 | transcription_start_site | + | 5518 | 5518 | -447  | 35233 | AN9476 |
| 3072 CONTIG196 | 4891 | 5251 | 0.61 | 1.66E-01 | transcription_start_site | + | 5777 | 5777 | -706  | 35234 | AN9476 |
| 3072 CONTIG196 | 4891 | 5251 | 0.61 | 1.66E-01 | transcription_start_site | + | 7193 | 7193 | -2122 | 35235 | AN9477 |
| 3072 CONTIG196 | 4891 | 5251 | 0.61 | 1.66E-01 | transcription_start_site | + | 7329 | 7329 | -2258 | 35236 | AN9477 |
| 3055 CONTIG198 | 4220 | 5226 | 0.72 | 6.84E-02 | transcription_start_site | - | 5083 | 5083 | 360   | 35243 | AN9481 |
| 3055 CONTIG198 | 4220 | 5226 | 0.72 | 6.84E-02 | transcription_start_site | - | 5449 | 5449 | 726   | 35242 | AN9481 |
| 3060 CONTIG198 | 6392 | 6876 | 0.7  | 8.01E-02 | transcription_start_site | - | 5449 | 5449 | -1185 | 35242 | AN9481 |
| 3060 CONTIG198 | 6392 | 6876 | 0.7  | 8.01E-02 | transcription_start_site | - | 5083 | 5083 | -1551 | 35243 | AN9481 |
| 3060 CONTIG198 | 6392 | 6876 | 0.7  | 8.01E-02 | transcription_start_site | - | 6557 | 6557 | -77   | 35244 | AN9482 |
| 3060 CONTIG198 | 6392 | 6876 | 0.7  | 8.01E-02 | transcription_start_site | - | 6422 | 6422 | -212  | 35245 | AN9482 |
| 1804 CONTIG199 | 1436 | 1795 | 1.45 | 1.30E-02 | transcription_start_site | - | 2318 | 2318 | 702   | 35246 | AN9483 |

|      |           |      |      |      |          |                          |   |      |      |       |       |        |
|------|-----------|------|------|------|----------|--------------------------|---|------|------|-------|-------|--------|
| 2076 | CONTIG200 | 2946 | 3295 | 1.34 | 5.22E-02 | transcription_start_site | + | 3408 | 3408 | -287  | 35252 | AN9484 |
| 2076 | CONTIG200 | 2946 | 3295 | 1.34 | 5.22E-02 | transcription_start_site | + | 2179 | 2179 | 941   | 35251 | AN9484 |
| 3071 | CONTIG201 | 4808 | 5083 | 0.62 | 9.24E-02 | transcription_start_site | + | 4353 | 4353 | 592   | 35256 | AN9486 |
| 2983 | CONTIG202 | 6232 | 6731 | 0.93 | 1.07E-01 | transcription_start_site | - | 3390 | 3390 | -3091 | 35257 | AN9487 |
| 2983 | CONTIG202 | 6232 | 6731 | 0.93 | 1.07E-01 | transcription_start_site | - | 3240 | 3240 | -3241 | 35258 | AN9487 |
| 2983 | CONTIG202 | 6232 | 6731 | 0.93 | 1.07E-01 | transcription_start_site | - | 2885 | 2885 | -3596 | 35259 | AN9487 |
| 2983 | CONTIG202 | 6232 | 6731 | 0.93 | 1.07E-01 | transcription_start_site | - | 2718 | 2718 | -3763 | 35260 | AN9487 |
| 2983 | CONTIG202 | 6232 | 6731 | 0.93 | 1.07E-01 | transcription_start_site | - | 2555 | 2555 | -3926 | 35261 | AN9487 |
| 2983 | CONTIG202 | 6232 | 6731 | 0.93 | 1.07E-01 | transcription_start_site | - | 2209 | 2209 | -4272 | 35262 | AN9487 |
| 2983 | CONTIG202 | 6232 | 6731 | 0.93 | 1.07E-01 | transcription_start_site | - | 2021 | 2021 | -4460 | 35263 | AN9487 |
| 2983 | CONTIG202 | 6232 | 6731 | 0.93 | 1.07E-01 | transcription_start_site | - | 1857 | 1857 | -4624 | 35264 | AN9487 |
| 2983 | CONTIG202 | 6232 | 6731 | 0.93 | 1.07E-01 | transcription_start_site | - | 1749 | 1749 | -4732 | 35265 | AN9487 |
| 2983 | CONTIG202 | 6232 | 6731 | 0.93 | 1.07E-01 | transcription_start_site | - | 1415 | 1415 | -5066 | 35266 | AN9487 |
| 2983 | CONTIG202 | 6232 | 6731 | 0.93 | 1.07E-01 | transcription_start_site | - | 6499 | 6499 | 17    | 35277 | AN9489 |
| 2983 | CONTIG202 | 6232 | 6731 | 0.93 | 1.07E-01 | transcription_start_site | - | 6850 | 6850 | 368   | 35276 | AN9489 |
| 2983 | CONTIG202 | 6232 | 6731 | 0.93 | 1.07E-01 | transcription_start_site | - | 7022 | 7022 | 540   | 35275 | AN9489 |
| 2983 | CONTIG202 | 6232 | 6731 | 0.93 | 1.07E-01 | transcription_start_site | - | 5638 | 5638 | -843  | 35278 | AN9489 |
| 2983 | CONTIG202 | 6232 | 6731 | 0.93 | 1.07E-01 | transcription_start_site | - | 5321 | 5321 | -1160 | 35279 | AN9489 |
| 2983 | CONTIG202 | 6232 | 6731 | 0.93 | 1.07E-01 | transcription_start_site | - | 5217 | 5217 | -1264 | 35280 | AN9489 |
| 954  | CONTIG205 | 4962 | 5226 | 1.96 | 2.12E-02 | transcription_start_site | - | 4462 | 4462 | -632  | 35289 | AN9492 |
| 954  | CONTIG205 | 4962 | 5226 | 1.96 | 2.12E-02 | transcription_start_site | - | 4319 | 4319 | -775  | 35290 | AN9492 |
| 7    | CONTIG206 | 831  | 1270 | 3.8  | 2.12E-02 | transcription_start_site | + | 6182 | 6182 | -5131 | 35293 | AN9494 |
| 3027 | CONTIG208 | 4971 | 5235 | 0.86 | 1.25E-01 | transcription_start_site | - | 1687 | 1687 | -3416 | 35295 | AN9495 |
| 3027 | CONTIG208 | 4971 | 5235 | 0.86 | 1.25E-01 | transcription_start_site | - | 229  | 229  | -4874 | 35296 | AN9495 |
| 3027 | CONTIG208 | 4971 | 5235 | 0.86 | 1.25E-01 | transcription_start_site | - | 4229 | 4229 | -874  | 35298 | AN9497 |
| 3027 | CONTIG208 | 4971 | 5235 | 0.86 | 1.25E-01 | transcription_start_site | - | 4161 | 4161 | -942  | 35299 | AN9497 |
| 3027 | CONTIG208 | 4971 | 5235 | 0.86 | 1.25E-01 | transcription_start_site | - | 3907 | 3907 | -1196 | 35300 | AN9497 |
| 3027 | CONTIG208 | 4971 | 5235 | 0.86 | 1.25E-01 | transcription_start_site | + | 5337 | 5337 | -234  | 35303 | AN9498 |
| 3027 | CONTIG208 | 4971 | 5235 | 0.86 | 1.25E-01 | transcription_start_site | + | 4678 | 4678 | 425   | 35302 | AN9498 |
| 3027 | CONTIG208 | 4971 | 5235 | 0.86 | 1.25E-01 | transcription_start_site | + | 4494 | 4494 | 609   | 35301 | AN9498 |
| 3027 | CONTIG208 | 4971 | 5235 | 0.86 | 1.25E-01 | transcription_start_site | - | 6227 | 6227 | 1124  | 35307 | AN9499 |
| 2153 | CONTIG209 | 2121 | 3125 | 1.31 | 1.17E-03 | transcription_start_site | + | 1570 | 1570 | 1053  | 35309 | AN9500 |
| 2532 | CONTIG210 | 1671 | 2545 | 1.19 | 1.28E-01 | transcription_start_site | - | 2460 | 2460 | 352   | 35311 | AN9501 |
| 2532 | CONTIG210 | 1671 | 2545 | 1.19 | 1.28E-01 | transcription_start_site | - | 1697 | 1697 | -411  | 35312 | AN9501 |
| 2532 | CONTIG210 | 1671 | 2545 | 1.19 | 1.28E-01 | transcription_start_site | - | 2697 | 2697 | 589   | 35310 | AN9501 |
| 2532 | CONTIG210 | 1671 | 2545 | 1.19 | 1.28E-01 | transcription_start_site | + | 3059 | 3059 | -951  | 35313 | AN9502 |
| 2532 | CONTIG210 | 1671 | 2545 | 1.19 | 1.28E-01 | transcription_start_site | + | 3197 | 3197 | -1089 | 35314 | AN9502 |
| 2532 | CONTIG210 | 1671 | 2545 | 1.19 | 1.28E-01 | transcription_start_site | + | 3436 | 3436 | -1328 | 35315 | AN9502 |
| 1211 | CONTIG215 | 766  | 1250 | 1.75 | 1.57E-02 | transcription_start_site | - | 1305 | 1305 | 297   | 35332 | AN9506 |
| 1211 | CONTIG215 | 766  | 1250 | 1.75 | 1.57E-02 | transcription_start_site | - | 1880 | 1880 | 872   | 35331 | AN9506 |
| 1211 | CONTIG215 | 766  | 1250 | 1.75 | 1.57E-02 | transcription_start_site | - | 2050 | 2050 | 1042  | 35330 | AN9506 |
| 1418 | CONTIG215 | 3006 | 3515 | 1.62 | 1.44E-02 | transcription_start_site | - | 2761 | 2761 | -499  | 35325 | AN9506 |
| 1418 | CONTIG215 | 3006 | 3515 | 1.62 | 1.44E-02 | transcription_start_site | - | 2615 | 2615 | -645  | 35326 | AN9506 |
| 1418 | CONTIG215 | 3006 | 3515 | 1.62 | 1.44E-02 | transcription_start_site | - | 2547 | 2547 | -713  | 35327 | AN9506 |
| 1418 | CONTIG215 | 3006 | 3515 | 1.62 | 1.44E-02 | transcription_start_site | - | 2446 | 2446 | -814  | 35328 | AN9506 |
| 1418 | CONTIG215 | 3006 | 3515 | 1.62 | 1.44E-02 | transcription_start_site | - | 2324 | 2324 | -936  | 35329 | AN9506 |
| 1418 | CONTIG215 | 3006 | 3515 | 1.62 | 1.44E-02 | transcription_start_site | - | 2050 | 2050 | -1210 | 35330 | AN9506 |
| 1418 | CONTIG215 | 3006 | 3515 | 1.62 | 1.44E-02 | transcription_start_site | - | 1880 | 1880 | -1380 | 35331 | AN9506 |
| 1418 | CONTIG215 | 3006 | 3515 | 1.62 | 1.44E-02 | transcription_start_site | - | 1305 | 1305 | -1955 | 35332 | AN9506 |
| 1506 | CONTIG215 | 3981 | 4255 | 1.58 | 3.08E-02 | transcription_start_site | - | 2761 | 2761 | -1357 | 35325 | AN9506 |
| 1506 | CONTIG215 | 3981 | 4255 | 1.58 | 3.08E-02 | transcription_start_site | - | 2615 | 2615 | -1503 | 35326 | AN9506 |
| 1506 | CONTIG215 | 3981 | 4255 | 1.58 | 3.08E-02 | transcription_start_site | - | 2547 | 2547 | -1571 | 35327 | AN9506 |
| 1506 | CONTIG215 | 3981 | 4255 | 1.58 | 3.08E-02 | transcription_start_site | - | 2446 | 2446 | -1672 | 35328 | AN9506 |
| 1506 | CONTIG215 | 3981 | 4255 | 1.58 | 3.08E-02 | transcription_start_site | - | 2324 | 2324 | -1794 | 35329 | AN9506 |
| 1506 | CONTIG215 | 3981 | 4255 | 1.58 | 3.08E-02 | transcription_start_site | - | 2050 | 2050 | -2068 | 35330 | AN9506 |
| 1506 | CONTIG215 | 3981 | 4255 | 1.58 | 3.08E-02 | transcription_start_site | - | 1880 | 1880 | -2238 | 35331 | AN9506 |
| 1506 | CONTIG215 | 3981 | 4255 | 1.58 | 3.08E-02 | transcription_start_site | - | 1305 | 1305 | -2813 | 35332 | AN9506 |

|      |           |      |      |      |          |                          |   |      |      |       |       |        |
|------|-----------|------|------|------|----------|--------------------------|---|------|------|-------|-------|--------|
| 341  | CONTIG220 | 2326 | 2695 | 2.7  | 6.61E-03 | transcription_start_site | + | 4698 | 4698 | -2187 | 35352 | AN9510 |
| 341  | CONTIG220 | 2326 | 2695 | 2.7  | 6.61E-03 | transcription_start_site | + | 5547 | 5547 | -3036 | 35353 | AN9510 |
| 2233 | CONTIG221 | 4881 | 5315 | 1.29 | 1.44E-01 | transcription_start_site | - | 2240 | 2240 | -2858 | 35354 | AN9511 |
| 2233 | CONTIG221 | 4881 | 5315 | 1.29 | 1.44E-01 | transcription_start_site | - | 1935 | 1935 | -3163 | 35355 | AN9511 |
| 2233 | CONTIG221 | 4881 | 5315 | 1.29 | 1.44E-01 | transcription_start_site | - | 1572 | 1572 | -3526 | 35356 | AN9511 |
| 2518 | CONTIG221 | 3166 | 3516 | 1.2  | 1.93E-01 | transcription_start_site | - | 2240 | 2240 | -1101 | 35354 | AN9511 |
| 2518 | CONTIG221 | 3166 | 3516 | 1.2  | 1.93E-01 | transcription_start_site | - | 1935 | 1935 | -1406 | 35355 | AN9511 |
| 2518 | CONTIG221 | 3166 | 3516 | 1.2  | 1.93E-01 | transcription_start_site | - | 1572 | 1572 | -1769 | 35356 | AN9511 |
| 2233 | CONTIG221 | 4881 | 5315 | 1.29 | 1.44E-01 | transcription_start_site | - | 4680 | 4680 | -418  | 35357 | AN9512 |
| 2233 | CONTIG221 | 4881 | 5315 | 1.29 | 1.44E-01 | transcription_start_site | - | 4607 | 4607 | -491  | 35358 | AN9512 |
| 2233 | CONTIG221 | 4881 | 5315 | 1.29 | 1.44E-01 | transcription_start_site | - | 4463 | 4463 | -635  | 35359 | AN9512 |
| 2518 | CONTIG221 | 3166 | 3516 | 1.2  | 1.93E-01 | transcription_start_site | - | 4463 | 4463 | 1122  | 35359 | AN9512 |
| 2034 | CONTIG223 | 4276 | 4775 | 1.36 | 3.70E-02 | transcription_start_site | + | 4311 | 4311 | 214   | 35361 | AN9514 |
| 3022 | CONTIG224 | 4521 | 5011 | 0.87 | 6.84E-02 | transcription_start_site | - | 4733 | 4733 | -33   | 35363 | AN9515 |
| 3022 | CONTIG224 | 4521 | 5011 | 0.87 | 6.84E-02 | transcription_start_site | - | 4149 | 4149 | -617  | 35364 | AN9515 |
| 3022 | CONTIG224 | 4521 | 5011 | 0.87 | 6.84E-02 | transcription_start_site | - | 5511 | 5511 | 745   | 35362 | AN9515 |
| 3022 | CONTIG224 | 4521 | 5011 | 0.87 | 6.84E-02 | transcription_start_site | - | 4011 | 4011 | -755  | 35365 | AN9515 |
| 3022 | CONTIG224 | 4521 | 5011 | 0.87 | 6.84E-02 | transcription_start_site | - | 3912 | 3912 | -854  | 35366 | AN9515 |
| 461  | CONTIG227 | 3168 | 3512 | 2.5  | 7.85E-03 | transcription_start_site | + | 3436 | 3436 | -96   | 35372 | AN9517 |
| 461  | CONTIG227 | 3168 | 3512 | 2.5  | 7.85E-03 | transcription_start_site | + | 4360 | 4360 | -1020 | 35373 | AN9517 |
| 461  | CONTIG227 | 3168 | 3512 | 2.5  | 7.85E-03 | transcription_start_site | + | 4864 | 4864 | -1524 | 35374 | AN9517 |
| 842  | CONTIG227 | 1131 | 2605 | 2.06 | 1.81E-02 | transcription_start_site | + | 3436 | 3436 | -1568 | 35372 | AN9517 |
| 842  | CONTIG227 | 1131 | 2605 | 2.06 | 1.81E-02 | transcription_start_site | + | 4360 | 4360 | -2492 | 35373 | AN9517 |
| 842  | CONTIG227 | 1131 | 2605 | 2.06 | 1.81E-02 | transcription_start_site | + | 4864 | 4864 | -2996 | 35374 | AN9517 |
| 2066 | CONTIG229 | 1596 | 2230 | 1.35 | 1.66E-01 | transcription_start_site | + | 1296 | 1296 | 617   | 35384 | AN9521 |
| 2066 | CONTIG229 | 1596 | 2230 | 1.35 | 1.66E-01 | transcription_start_site | + | 1119 | 1119 | 794   | 35383 | AN9521 |
| 312  | CONTIG229 | 2946 | 3351 | 2.75 | 1.54E-03 | transcription_start_site | + | 1967 | 1967 | 1181  | 35386 | AN9522 |
| 1281 | CONTIG229 | 2336 | 2825 | 1.71 | 5.88E-02 | transcription_start_site | + | 1967 | 1967 | 613   | 35386 | AN9522 |
| 1281 | CONTIG229 | 2336 | 2825 | 1.71 | 5.88E-02 | transcription_start_site | + | 1857 | 1857 | 723   | 35385 | AN9522 |
| 2066 | CONTIG229 | 1596 | 2230 | 1.35 | 1.66E-01 | transcription_start_site | + | 1967 | 1967 | -54   | 35386 | AN9522 |
| 2066 | CONTIG229 | 1596 | 2230 | 1.35 | 1.66E-01 | transcription_start_site | + | 1857 | 1857 | 56    | 35385 | AN9522 |
| 281  | CONTIG230 | 1971 | 2320 | 2.8  | 9.21E-03 | transcription_start_site | + | 2599 | 2599 | -453  | 35387 | AN9523 |
| 3032 | CONTIG231 | 1656 | 2075 | 0.84 | 8.01E-02 | transcription_start_site | - | 2324 | 2324 | 458   | 35389 | AN9524 |
| 3032 | CONTIG231 | 1656 | 2075 | 0.84 | 8.01E-02 | transcription_start_site | - | 2691 | 2691 | 825   | 35388 | AN9524 |
| 2006 | CONTIG233 | 3081 | 3370 | 1.37 | 9.24E-02 | transcription_start_site | - | 2863 | 2863 | -362  | 35392 | AN9526 |
| 2006 | CONTIG233 | 3081 | 3370 | 1.37 | 9.24E-02 | transcription_start_site | - | 2558 | 2558 | -667  | 35393 | AN9526 |
| 2006 | CONTIG233 | 3081 | 3370 | 1.37 | 9.24E-02 | transcription_start_site | - | 2330 | 2330 | -895  | 35394 | AN9526 |
| 2006 | CONTIG233 | 3081 | 3370 | 1.37 | 9.24E-02 | transcription_start_site | - | 1716 | 1716 | -1509 | 35395 | AN9526 |
| 2670 | CONTIG233 | 3396 | 4025 | 1.14 | 1.93E-01 | transcription_start_site | - | 2863 | 2863 | -847  | 35392 | AN9526 |
| 2670 | CONTIG233 | 3396 | 4025 | 1.14 | 1.93E-01 | transcription_start_site | - | 2558 | 2558 | -1152 | 35393 | AN9526 |
| 2670 | CONTIG233 | 3396 | 4025 | 1.14 | 1.93E-01 | transcription_start_site | - | 2330 | 2330 | -1380 | 35394 | AN9526 |
| 2670 | CONTIG233 | 3396 | 4025 | 1.14 | 1.93E-01 | transcription_start_site | - | 1716 | 1716 | -1994 | 35395 | AN9526 |
| 3046 | CONTIG234 | 3451 | 4100 | 0.77 | 1.07E-01 | transcription_start_site | - | 2881 | 2881 | -894  | 35399 | AN9528 |
| 3046 | CONTIG234 | 3451 | 4100 | 0.77 | 1.07E-01 | transcription_start_site | - | 2801 | 2801 | -974  | 35400 | AN9528 |
| 3046 | CONTIG234 | 3451 | 4100 | 0.77 | 1.07E-01 | transcription_start_site | - | 2718 | 2718 | -1057 | 35401 | AN9528 |
| 3046 | CONTIG234 | 3451 | 4100 | 0.77 | 1.07E-01 | transcription_start_site | + | 4059 | 4059 | -283  | 35403 | AN9529 |
| 3046 | CONTIG234 | 3451 | 4100 | 0.77 | 1.07E-01 | transcription_start_site | + | 3252 | 3252 | 523   | 35402 | AN9529 |
| 3046 | CONTIG234 | 3451 | 4100 | 0.77 | 1.07E-01 | transcription_start_site | - | 4874 | 4874 | 1098  | 35404 | AN9530 |



| PEAK_ID | CHROMOSOME | PEAK_START | PEAK_END | PEAK_SCORE | PEAK_FDR | FEATURE_TRACK            | FEATURE_STRAND | FEATURE_START | FEATURE_END | FEATURE_TO_PEAK_DISTANCE | Parent | accession |
|---------|------------|------------|----------|------------|----------|--------------------------|----------------|---------------|-------------|--------------------------|--------|-----------|
| 2016    | CONTIG2    | 25126      | 25625    | 0.93       | 6.04E-02 | transcription_start_site | -              | 22026         | 22026       | -3349                    | 14     | AN0009    |
| 2016    | CONTIG2    | 25126      | 25625    | 0.93       | 6.04E-02 | transcription_start_site | +              | 24566         | 24566       | 809                      | 18     | AN0010    |
| 2016    | CONTIG2    | 25126      | 25625    | 0.93       | 6.04E-02 | transcription_start_site | +              | 24138         | 24138       | 1237                     | 17     | AN0010    |
| 2016    | CONTIG2    | 25126      | 25625    | 0.93       | 6.04E-02 | transcription_start_site | +              | 26209         | 26209       | -833                     | 19     | AN0011    |
| 2016    | CONTIG2    | 25126      | 25625    | 0.93       | 6.04E-02 | transcription_start_site | +              | 26620         | 26620       | -1244                    | 20     | AN0011    |
| 2016    | CONTIG2    | 25126      | 25625    | 0.93       | 6.04E-02 | transcription_start_site | +              | 26757         | 26757       | -1381                    | 21     | AN0011    |
| 2016    | CONTIG2    | 25126      | 25625    | 0.93       | 6.04E-02 | transcription_start_site | +              | 27319         | 27319       | -1943                    | 22     | AN0011    |
| 766     | CONTIG2    | 73807      | 74677    | 1.97       | 0.00E+00 | transcription_start_site | -              | 73218         | 73218       | -1024                    | 50     | AN0017    |
| 766     | CONTIG2    | 73807      | 74677    | 1.97       | 0.00E+00 | transcription_start_site | -              | 73024         | 73024       | -1218                    | 51     | AN0017    |
| 1286    | CONTIG2    | 74717      | 75966    | 1.45       | 2.49E-03 | transcription_start_site | -              | 73218         | 73218       | -2123                    | 50     | AN0017    |
| 1286    | CONTIG2    | 74717      | 75966    | 1.45       | 2.49E-03 | transcription_start_site | -              | 73024         | 73024       | -2317                    | 51     | AN0017    |
| 766     | CONTIG2    | 73807      | 74677    | 1.97       | 0.00E+00 | transcription_start_site | +              | 73927         | 73927       | 315                      | 52     | AN0018    |
| 766     | CONTIG2    | 73807      | 74677    | 1.97       | 0.00E+00 | transcription_start_site | +              | 74648         | 74648       | -406                     | 53     | AN0018    |
| 766     | CONTIG2    | 73807      | 74677    | 1.97       | 0.00E+00 | transcription_start_site | +              | 75130         | 75130       | -888                     | 54     | AN0018    |
| 1286    | CONTIG2    | 74717      | 75966    | 1.45       | 2.49E-03 | transcription_start_site | +              | 75130         | 75130       | 211                      | 54     | AN0018    |
| 1286    | CONTIG2    | 74717      | 75966    | 1.45       | 2.49E-03 | transcription_start_site | +              | 74648         | 74648       | 693                      | 53     | AN0018    |
| 1286    | CONTIG2    | 74717      | 75966    | 1.45       | 2.49E-03 | transcription_start_site | +              | 73927         | 73927       | 1414                     | 52     | AN0018    |
| 766     | CONTIG2    | 73807      | 74677    | 1.97       | 0.00E+00 | transcription_start_site | +              | 76862         | 76862       | -2620                    | 55     | AN0019    |
| 766     | CONTIG2    | 73807      | 74677    | 1.97       | 0.00E+00 | transcription_start_site | +              | 77018         | 77018       | -2776                    | 56     | AN0019    |
| 766     | CONTIG2    | 73807      | 74677    | 1.97       | 0.00E+00 | transcription_start_site | +              | 77350         | 77350       | -3108                    | 57     | AN0019    |
| 1286    | CONTIG2    | 74717      | 75966    | 1.45       | 2.49E-03 | transcription_start_site | +              | 76862         | 76862       | -1520                    | 55     | AN0019    |
| 1286    | CONTIG2    | 74717      | 75966    | 1.45       | 2.49E-03 | transcription_start_site | +              | 77018         | 77018       | -1676                    | 56     | AN0019    |
| 1286    | CONTIG2    | 74717      | 75966    | 1.45       | 2.49E-03 | transcription_start_site | +              | 77350         | 77350       | -2008                    | 57     | AN0019    |
| 1939    | CONTIG2    | 115437     | 116016   | 0.98       | 4.78E-02 | transcription_start_site | -              | 110851        | 110851      | -4875                    | 97     | AN0032    |
| 1939    | CONTIG2    | 115437     | 116016   | 0.98       | 4.78E-02 | transcription_start_site | -              | 110657        | 110657      | -5069                    | 98     | AN0032    |
| 1939    | CONTIG2    | 115437     | 116016   | 0.98       | 4.78E-02 | transcription_start_site | -              | 110462        | 110462      | -5264                    | 99     | AN0032    |
| 694     | CONTIG2    | 116492     | 117141   | 2.05       | 0.00E+00 | transcription_start_site | -              | 115420        | 115420      | -1396                    | 102    | AN0034    |
| 694     | CONTIG2    | 116492     | 117141   | 2.05       | 0.00E+00 | transcription_start_site | -              | 115263        | 115263      | -1553                    | 103    | AN0034    |
| 694     | CONTIG2    | 116492     | 117141   | 2.05       | 0.00E+00 | transcription_start_site | -              | 114707        | 114707      | -2109                    | 104    | AN0034    |
| 694     | CONTIG2    | 116492     | 117141   | 2.05       | 0.00E+00 | transcription_start_site | -              | 114035        | 114035      | -2781                    | 105    | AN0034    |
| 961     | CONTIG2    | 118512     | 118851   | 1.75       | 8.43E-04 | transcription_start_site | -              | 115420        | 115420      | -3261                    | 102    | AN0034    |
| 961     | CONTIG2    | 118512     | 118851   | 1.75       | 8.43E-04 | transcription_start_site | -              | 115263        | 115263      | -3418                    | 103    | AN0034    |
| 961     | CONTIG2    | 118512     | 118851   | 1.75       | 8.43E-04 | transcription_start_site | -              | 114707        | 114707      | -3974                    | 104    | AN0034    |
| 961     | CONTIG2    | 118512     | 118851   | 1.75       | 8.43E-04 | transcription_start_site | -              | 114035        | 114035      | -4646                    | 105    | AN0034    |
| 1939    | CONTIG2    | 115437     | 116016   | 0.98       | 4.78E-02 | transcription_start_site | -              | 115420        | 115420      | -306                     | 102    | AN0034    |
| 1939    | CONTIG2    | 115437     | 116016   | 0.98       | 4.78E-02 | transcription_start_site | -              | 115263        | 115263      | -463                     | 103    | AN0034    |
| 1939    | CONTIG2    | 115437     | 116016   | 0.98       | 4.78E-02 | transcription_start_site | -              | 114707        | 114707      | -1019                    | 104    | AN0034    |
| 1939    | CONTIG2    | 115437     | 116016   | 0.98       | 4.78E-02 | transcription_start_site | -              | 114035        | 114035      | -1691                    | 105    | AN0034    |
| 694     | CONTIG2    | 116492     | 117141   | 2.05       | 0.00E+00 | transcription_start_site | +              | 118643        | 118643      | -1826                    | 106    | AN0035    |
| 694     | CONTIG2    | 116492     | 117141   | 2.05       | 0.00E+00 | transcription_start_site | +              | 119220        | 119220      | -2403                    | 107    | AN0035    |
| 694     | CONTIG2    | 116492     | 117141   | 2.05       | 0.00E+00 | transcription_start_site | +              | 119381        | 119381      | -2564                    | 108    | AN0035    |
| 694     | CONTIG2    | 116492     | 117141   | 2.05       | 0.00E+00 | transcription_start_site | +              | 119861        | 119861      | -3044                    | 109    | AN0035    |
| 694     | CONTIG2    | 116492     | 117141   | 2.05       | 0.00E+00 | transcription_start_site | +              | 120281        | 120281      | -3464                    | 110    | AN0035    |
| 961     | CONTIG2    | 118512     | 118851   | 1.75       | 8.43E-04 | transcription_start_site | +              | 118643        | 118643      | 38                       | 106    | AN0035    |
| 961     | CONTIG2    | 118512     | 118851   | 1.75       | 8.43E-04 | transcription_start_site | +              | 119220        | 119220      | -538                     | 107    | AN0035    |
| 961     | CONTIG2    | 118512     | 118851   | 1.75       | 8.43E-04 | transcription_start_site | +              | 119381        | 119381      | -699                     | 108    | AN0035    |
| 961     | CONTIG2    | 118512     | 118851   | 1.75       | 8.43E-04 | transcription_start_site | +              | 119861        | 119861      | -1179                    | 109    | AN0035    |
| 961     | CONTIG2    | 118512     | 118851   | 1.75       | 8.43E-04 | transcription_start_site | +              | 120281        | 120281      | -1599                    | 110    | AN0035    |
| 1939    | CONTIG2    | 115437     | 116016   | 0.98       | 4.78E-02 | transcription_start_site | +              | 118643        | 118643      | -2916                    | 106    | AN0035    |
| 1939    | CONTIG2    | 115437     | 116016   | 0.98       | 4.78E-02 | transcription_start_site | +              | 119220        | 119220      | -3493                    | 107    | AN0035    |
| 1939    | CONTIG2    | 115437     | 116016   | 0.98       | 4.78E-02 | transcription_start_site | +              | 119381        | 119381      | -3654                    | 108    | AN0035    |
| 1939    | CONTIG2    | 115437     | 116016   | 0.98       | 4.78E-02 | transcription_start_site | +              | 119861        | 119861      | -4134                    | 109    | AN0035    |
| 1939    | CONTIG2    | 115437     | 116016   | 0.98       | 4.78E-02 | transcription_start_site | +              | 120281        | 120281      | -4554                    | 110    | AN0035    |
| 694     | CONTIG2    | 116492     | 117141   | 2.05       | 0.00E+00 | transcription_start_site | +              | 121024        | 121024      | -4207                    | 111    | AN0036    |
| 694     | CONTIG2    | 116492     | 117141   | 2.05       | 0.00E+00 | transcription_start_site | +              | 121123        | 121123      | -4306                    | 112    | AN0036    |
| 961     | CONTIG2    | 118512     | 118851   | 1.75       | 8.43E-04 | transcription_start_site | +              | 121024        | 121024      | -2342                    | 111    | AN0036    |

|      |         |        |        |      |          |                          |   |        |        |       |     |        |
|------|---------|--------|--------|------|----------|--------------------------|---|--------|--------|-------|-----|--------|
| 961  | CONTIG2 | 118512 | 118851 | 1.75 | 8.43E-04 | transcription_start_site | + | 121123 | 121123 | -2441 | 112 | AN0036 |
| 1629 | CONTIG2 | 155930 | 158004 | 1.18 | 8.99E-03 | transcription_start_site | - | 151883 | 151883 | -5084 | 133 | AN0043 |
| 1629 | CONTIG2 | 155930 | 158004 | 1.18 | 8.99E-03 | transcription_start_site | - | 151627 | 151627 | -5340 | 134 | AN0043 |
| 1629 | CONTIG2 | 155930 | 158004 | 1.18 | 8.99E-03 | transcription_start_site | - | 157153 | 157153 | 186   | 137 | AN0045 |
| 1629 | CONTIG2 | 155930 | 158004 | 1.18 | 8.99E-03 | transcription_start_site | - | 157406 | 157406 | 439   | 136 | AN0045 |
| 1629 | CONTIG2 | 155930 | 158004 | 1.18 | 8.99E-03 | transcription_start_site | - | 158769 | 158769 | 1802  | 142 | AN0046 |
| 1894 | CONTIG3 | 4126   | 4400   | 1.01 | 1.22E-01 | transcription_start_site | - | 3438   | 3438   | -825  | 146 | AN0050 |
| 1894 | CONTIG3 | 4126   | 4400   | 1.01 | 1.22E-01 | transcription_start_site | - | 2407   | 2407   | -1856 | 147 | AN0050 |
| 1894 | CONTIG3 | 4126   | 4400   | 1.01 | 1.22E-01 | transcription_start_site | + | 4059   | 4059   | 204   | 149 | AN0051 |
| 1894 | CONTIG3 | 4126   | 4400   | 1.01 | 1.22E-01 | transcription_start_site | + | 3919   | 3919   | 344   | 148 | AN0051 |
| 1894 | CONTIG3 | 4126   | 4400   | 1.01 | 1.22E-01 | transcription_start_site | + | 6582   | 6582   | -2319 | 152 | AN0053 |
| 261  | CONTIG3 | 19278  | 20827  | 2.69 | 0.00E+00 | transcription_start_site | - | 18585  | 18585  | -1467 | 157 | AN0056 |
| 261  | CONTIG3 | 19278  | 20827  | 2.69 | 0.00E+00 | transcription_start_site | + | 22996  | 22996  | -2943 | 158 | AN0057 |
| 261  | CONTIG3 | 19278  | 20827  | 2.69 | 0.00E+00 | transcription_start_site | + | 23657  | 23657  | -3604 | 159 | AN0057 |
| 261  | CONTIG3 | 19278  | 20827  | 2.69 | 0.00E+00 | transcription_start_site | + | 23775  | 23775  | -3722 | 160 | AN0057 |
| 1639 | CONTIG3 | 35028  | 35317  | 1.18 | 6.74E-02 | transcription_start_site | - | 34666  | 34666  | -506  | 166 | AN0062 |
| 1639 | CONTIG3 | 35028  | 35317  | 1.18 | 6.74E-02 | transcription_start_site | + | 35322  | 35322  | -149  | 167 | AN0063 |
| 1639 | CONTIG3 | 35028  | 35317  | 1.18 | 6.74E-02 | transcription_start_site | + | 35449  | 35449  | -276  | 168 | AN0063 |
| 1639 | CONTIG3 | 35028  | 35317  | 1.18 | 6.74E-02 | transcription_start_site | + | 35701  | 35701  | -528  | 169 | AN0063 |
| 1639 | CONTIG3 | 35028  | 35317  | 1.18 | 6.74E-02 | transcription_start_site | + | 36076  | 36076  | -903  | 170 | AN0063 |
| 1639 | CONTIG3 | 35028  | 35317  | 1.18 | 6.74E-02 | transcription_start_site | + | 36391  | 36391  | -1218 | 171 | AN0063 |
| 1639 | CONTIG3 | 35028  | 35317  | 1.18 | 6.74E-02 | transcription_start_site | + | 36945  | 36945  | -1772 | 172 | AN0063 |
| 1639 | CONTIG3 | 35028  | 35317  | 1.18 | 6.74E-02 | transcription_start_site | + | 37708  | 37708  | -2535 | 173 | AN0064 |
| 1639 | CONTIG3 | 35028  | 35317  | 1.18 | 6.74E-02 | transcription_start_site | + | 39378  | 39378  | -4205 | 174 | AN0064 |
| 1383 | CONTIG3 | 51464  | 51813  | 1.36 | 1.83E-02 | transcription_start_site | - | 49927  | 49927  | -1711 | 190 | AN0069 |
| 1383 | CONTIG3 | 51464  | 51813  | 1.36 | 1.83E-02 | transcription_start_site | - | 49586  | 49586  | -2052 | 191 | AN0069 |
| 1383 | CONTIG3 | 51464  | 51813  | 1.36 | 1.83E-02 | transcription_start_site | - | 49302  | 49302  | -2336 | 192 | AN0069 |
| 1383 | CONTIG3 | 51464  | 51813  | 1.36 | 1.83E-02 | transcription_start_site | - | 48972  | 48972  | -2666 | 193 | AN0069 |
| 1383 | CONTIG3 | 51464  | 51813  | 1.36 | 1.83E-02 | transcription_start_site | - | 48381  | 48381  | -3257 | 194 | AN0069 |
| 1383 | CONTIG3 | 51464  | 51813  | 1.36 | 1.83E-02 | transcription_start_site | - | 51105  | 51105  | -533  | 195 | AN0070 |
| 1383 | CONTIG3 | 51464  | 51813  | 1.36 | 1.83E-02 | transcription_start_site | - | 50649  | 50649  | -989  | 196 | AN0070 |
| 1383 | CONTIG3 | 51464  | 51813  | 1.36 | 1.83E-02 | transcription_start_site | - | 50416  | 50416  | -1222 | 197 | AN0070 |
| 1383 | CONTIG3 | 51464  | 51813  | 1.36 | 1.83E-02 | transcription_start_site | + | 52164  | 52164  | -525  | 198 | AN0071 |
| 1383 | CONTIG3 | 51464  | 51813  | 1.36 | 1.83E-02 | transcription_start_site | + | 52296  | 52296  | -657  | 199 | AN0071 |
| 1383 | CONTIG3 | 51464  | 51813  | 1.36 | 1.83E-02 | transcription_start_site | + | 52548  | 52548  | -909  | 200 | AN0071 |
| 1383 | CONTIG3 | 51464  | 51813  | 1.36 | 1.83E-02 | transcription_start_site | + | 55650  | 55650  | -4011 | 201 | AN0071 |
| 506  | CONTIG3 | 96693  | 96952  | 2.3  | 8.43E-04 | transcription_start_site | - | 92299  | 92299  | -4523 | 250 | AN0085 |
| 506  | CONTIG3 | 96693  | 96952  | 2.3  | 8.43E-04 | transcription_start_site | - | 95477  | 95477  | -1345 | 254 | AN0086 |
| 506  | CONTIG3 | 96693  | 96952  | 2.3  | 8.43E-04 | transcription_start_site | - | 95140  | 95140  | -1682 | 255 | AN0086 |
| 506  | CONTIG3 | 96693  | 96952  | 2.3  | 8.43E-04 | transcription_start_site | - | 94692  | 94692  | -2130 | 256 | AN0086 |
| 506  | CONTIG3 | 96693  | 96952  | 2.3  | 8.43E-04 | transcription_start_site | - | 94556  | 94556  | -2266 | 257 | AN0086 |
| 506  | CONTIG3 | 96693  | 96952  | 2.3  | 8.43E-04 | transcription_start_site | - | 94105  | 94105  | -2717 | 258 | AN0086 |
| 506  | CONTIG3 | 96693  | 96952  | 2.3  | 8.43E-04 | transcription_start_site | + | 98130  | 98130  | -1307 | 259 | AN0087 |
| 506  | CONTIG3 | 96693  | 96952  | 2.3  | 8.43E-04 | transcription_start_site | + | 98435  | 98435  | -1612 | 260 | AN0087 |
| 1384 | CONTIG3 | 106430 | 106864 | 1.36 | 1.83E-02 | transcription_start_site | - | 101732 | 101732 | -4915 | 261 | AN0088 |
| 1384 | CONTIG3 | 106430 | 106864 | 1.36 | 1.83E-02 | transcription_start_site | - | 101550 | 101550 | -5097 | 262 | AN0088 |
| 1384 | CONTIG3 | 106430 | 106864 | 1.36 | 1.83E-02 | transcription_start_site | - | 103238 | 103238 | -3409 | 266 | AN0089 |
| 1384 | CONTIG3 | 106430 | 106864 | 1.36 | 1.83E-02 | transcription_start_site | - | 103150 | 103150 | -3497 | 267 | AN0089 |
| 1384 | CONTIG3 | 106430 | 106864 | 1.36 | 1.83E-02 | transcription_start_site | - | 103034 | 103034 | -3613 | 268 | AN0089 |
| 1384 | CONTIG3 | 106430 | 106864 | 1.36 | 1.83E-02 | transcription_start_site | - | 102885 | 102885 | -3762 | 269 | AN0089 |
| 1384 | CONTIG3 | 106430 | 106864 | 1.36 | 1.83E-02 | transcription_start_site | - | 102656 | 102656 | -3991 | 270 | AN0089 |
| 1384 | CONTIG3 | 106430 | 106864 | 1.36 | 1.83E-02 | transcription_start_site | - | 102457 | 102457 | -4190 | 271 | AN0089 |
| 1384 | CONTIG3 | 106430 | 106864 | 1.36 | 1.83E-02 | transcription_start_site | - | 106291 | 106291 | -356  | 275 | AN0091 |
| 1384 | CONTIG3 | 106430 | 106864 | 1.36 | 1.83E-02 | transcription_start_site | - | 105692 | 105692 | -955  | 276 | AN0091 |
| 1384 | CONTIG3 | 106430 | 106864 | 1.36 | 1.83E-02 | transcription_start_site | - | 107255 | 107255 | 608   | 280 | AN0092 |
| 1384 | CONTIG3 | 106430 | 106864 | 1.36 | 1.83E-02 | transcription_start_site | + | 109671 | 109671 | -3024 | 281 | AN0093 |
| 1384 | CONTIG3 | 106430 | 106864 | 1.36 | 1.83E-02 | transcription_start_site | + | 109843 | 109843 | -3196 | 282 | AN0093 |

|      |         |        |        |      |          |                          |   |        |        |       |     |        |
|------|---------|--------|--------|------|----------|--------------------------|---|--------|--------|-------|-----|--------|
| 1384 | CONTIG3 | 106430 | 106864 | 1.36 | 1.83E-02 | transcription_start_site | + | 111715 | 111715 | -5068 | 283 | AN0093 |
| 1384 | CONTIG3 | 106430 | 106864 | 1.36 | 1.83E-02 | transcription_start_site | + | 111849 | 111849 | -5202 | 284 | AN0093 |
| 462  | CONTIG3 | 119328 | 119842 | 2.37 | 3.81E-04 | transcription_start_site | - | 115492 | 115492 | -4093 | 287 | AN0094 |
| 462  | CONTIG3 | 119328 | 119842 | 2.37 | 3.81E-04 | transcription_start_site | - | 115248 | 115248 | -4337 | 288 | AN0094 |
| 462  | CONTIG3 | 119328 | 119842 | 2.37 | 3.81E-04 | transcription_start_site | - | 115151 | 115151 | -4434 | 289 | AN0094 |
| 462  | CONTIG3 | 119328 | 119842 | 2.37 | 3.81E-04 | transcription_start_site | - | 114765 | 114765 | -4820 | 290 | AN0094 |
| 1890 | CONTIG3 | 115893 | 116251 | 1.01 | 7.38E-02 | transcription_start_site | - | 115492 | 115492 | -580  | 287 | AN0094 |
| 1890 | CONTIG3 | 115893 | 116251 | 1.01 | 7.38E-02 | transcription_start_site | - | 115248 | 115248 | -824  | 288 | AN0094 |
| 1890 | CONTIG3 | 115893 | 116251 | 1.01 | 7.38E-02 | transcription_start_site | - | 115151 | 115151 | -921  | 289 | AN0094 |
| 1890 | CONTIG3 | 115893 | 116251 | 1.01 | 7.38E-02 | transcription_start_site | - | 114765 | 114765 | -1307 | 290 | AN0094 |
| 1890 | CONTIG3 | 115893 | 116251 | 1.01 | 7.38E-02 | transcription_start_site | - | 113975 | 113975 | -2097 | 291 | AN0094 |
| 1890 | CONTIG3 | 115893 | 116251 | 1.01 | 7.38E-02 | transcription_start_site | - | 113873 | 113873 | -2199 | 292 | AN0094 |
| 1890 | CONTIG3 | 115893 | 116251 | 1.01 | 7.38E-02 | transcription_start_site | - | 113750 | 113750 | -2322 | 293 | AN0094 |
| 1890 | CONTIG3 | 115893 | 116251 | 1.01 | 7.38E-02 | transcription_start_site | - | 113434 | 113434 | -2638 | 294 | AN0094 |
| 1890 | CONTIG3 | 115893 | 116251 | 1.01 | 7.38E-02 | transcription_start_site | - | 112691 | 112691 | -3381 | 295 | AN0094 |
| 462  | CONTIG3 | 119328 | 119842 | 2.37 | 3.81E-04 | transcription_start_site | - | 119588 | 119588 | 3     | 296 | AN0095 |
| 462  | CONTIG3 | 119328 | 119842 | 2.37 | 3.81E-04 | transcription_start_site | + | 120336 | 120336 | -751  | 297 | AN0096 |
| 462  | CONTIG3 | 119328 | 119842 | 2.37 | 3.81E-04 | transcription_start_site | + | 120455 | 120455 | -870  | 298 | AN0096 |
| 462  | CONTIG3 | 119328 | 119842 | 2.37 | 3.81E-04 | transcription_start_site | + | 120748 | 120748 | -1163 | 299 | AN0096 |
| 462  | CONTIG3 | 119328 | 119842 | 2.37 | 3.81E-04 | transcription_start_site | + | 122202 | 122202 | -2617 | 300 | AN0096 |
| 462  | CONTIG3 | 119328 | 119842 | 2.37 | 3.81E-04 | transcription_start_site | + | 122369 | 122369 | -2784 | 301 | AN0096 |
| 462  | CONTIG3 | 119328 | 119842 | 2.37 | 3.81E-04 | transcription_start_site | + | 122688 | 122688 | -3103 | 302 | AN0096 |
| 462  | CONTIG3 | 119328 | 119842 | 2.37 | 3.81E-04 | transcription_start_site | + | 122885 | 122885 | -3300 | 303 | AN0096 |
| 462  | CONTIG3 | 119328 | 119842 | 2.37 | 3.81E-04 | transcription_start_site | + | 123900 | 123900 | -4315 | 304 | AN0096 |
| 1890 | CONTIG3 | 115893 | 116251 | 1.01 | 7.38E-02 | transcription_start_site | + | 120336 | 120336 | -4264 | 297 | AN0096 |
| 1890 | CONTIG3 | 115893 | 116251 | 1.01 | 7.38E-02 | transcription_start_site | + | 120455 | 120455 | -4383 | 298 | AN0096 |
| 1890 | CONTIG3 | 115893 | 116251 | 1.01 | 7.38E-02 | transcription_start_site | + | 120748 | 120748 | -4676 | 299 | AN0096 |
| 462  | CONTIG3 | 119328 | 119842 | 2.37 | 3.81E-04 | transcription_start_site | + | 124162 | 124162 | -4577 | 305 | AN0097 |
| 462  | CONTIG3 | 119328 | 119842 | 2.37 | 3.81E-04 | transcription_start_site | + | 124296 | 124296 | -4711 | 306 | AN0097 |
| 2145 | CONTIG4 | 16821  | 17080  | 0.84 | 1.54E-01 | transcription_start_site | - | 16612  | 16612  | -338  | 335 | AN0103 |
| 2145 | CONTIG4 | 16821  | 17080  | 0.84 | 1.54E-01 | transcription_start_site | - | 16534  | 16534  | -416  | 336 | AN0103 |
| 2145 | CONTIG4 | 16821  | 17080  | 0.84 | 1.54E-01 | transcription_start_site | - | 15826  | 15826  | -1124 | 337 | AN0103 |
| 2145 | CONTIG4 | 16821  | 17080  | 0.84 | 1.54E-01 | transcription_start_site | - | 15349  | 15349  | -1601 | 338 | AN0103 |
| 2145 | CONTIG4 | 16821  | 17080  | 0.84 | 1.54E-01 | transcription_start_site | + | 18189  | 18189  | -1238 | 339 | AN0104 |
| 2145 | CONTIG4 | 16821  | 17080  | 0.84 | 1.54E-01 | transcription_start_site | + | 18374  | 18374  | -1423 | 340 | AN0104 |
| 2145 | CONTIG4 | 16821  | 17080  | 0.84 | 1.54E-01 | transcription_start_site | + | 18953  | 18953  | -2002 | 341 | AN0104 |
| 2145 | CONTIG4 | 16821  | 17080  | 0.84 | 1.54E-01 | transcription_start_site | + | 21586  | 21586  | -4635 | 344 | AN0106 |
| 2145 | CONTIG4 | 16821  | 17080  | 0.84 | 1.54E-01 | transcription_start_site | + | 22074  | 22074  | -5123 | 345 | AN0106 |
| 1065 | CONTIG4 | 63079  | 63578  | 1.65 | 7.70E-03 | transcription_start_site | + | 65613  | 65613  | -2284 | 389 | AN0117 |
| 1065 | CONTIG4 | 63079  | 63578  | 1.65 | 7.70E-03 | transcription_start_site | + | 65714  | 65714  | -2385 | 390 | AN0117 |
| 1065 | CONTIG4 | 63079  | 63578  | 1.65 | 7.70E-03 | transcription_start_site | + | 66008  | 66008  | -2679 | 391 | AN0117 |
| 1065 | CONTIG4 | 63079  | 63578  | 1.65 | 7.70E-03 | transcription_start_site | + | 66488  | 66488  | -3159 | 392 | AN0117 |
| 1065 | CONTIG4 | 63079  | 63578  | 1.65 | 7.70E-03 | transcription_start_site | + | 66913  | 66913  | -3584 | 393 | AN0117 |
| 1429 | CONTIG4 | 82204  | 82558  | 1.32 | 2.63E-02 | transcription_start_site | - | 81977  | 81977  | -404  | 394 | AN0118 |
| 1429 | CONTIG4 | 82204  | 82558  | 1.32 | 2.63E-02 | transcription_start_site | - | 81630  | 81630  | -751  | 395 | AN0118 |
| 2003 | CONTIG4 | 88654  | 89158  | 0.94 | 1.08E-01 | transcription_start_site | - | 85166  | 85166  | -3740 | 396 | AN0119 |
| 2003 | CONTIG4 | 88654  | 89158  | 0.94 | 1.08E-01 | transcription_start_site | - | 85056  | 85056  | -3850 | 397 | AN0119 |
| 2003 | CONTIG4 | 88654  | 89158  | 0.94 | 1.08E-01 | transcription_start_site | - | 84979  | 84979  | -3927 | 398 | AN0119 |
| 2003 | CONTIG4 | 88654  | 89158  | 0.94 | 1.08E-01 | transcription_start_site | - | 84826  | 84826  | -4080 | 399 | AN0119 |
| 2003 | CONTIG4 | 88654  | 89158  | 0.94 | 1.08E-01 | transcription_start_site | - | 84510  | 84510  | -4396 | 400 | AN0119 |
| 2003 | CONTIG4 | 88654  | 89158  | 0.94 | 1.08E-01 | transcription_start_site | - | 84354  | 84354  | -4552 | 401 | AN0119 |
| 2003 | CONTIG4 | 88654  | 89158  | 0.94 | 1.08E-01 | transcription_start_site | - | 83677  | 83677  | -5229 | 402 | AN0119 |
| 1429 | CONTIG4 | 82204  | 82558  | 1.32 | 2.63E-02 | transcription_start_site | + | 86128  | 86128  | -3747 | 404 | AN0120 |
| 1429 | CONTIG4 | 82204  | 82558  | 1.32 | 2.63E-02 | transcription_start_site | + | 86399  | 86399  | -4018 | 405 | AN0120 |
| 1429 | CONTIG4 | 82204  | 82558  | 1.32 | 2.63E-02 | transcription_start_site | + | 86732  | 86732  | -4351 | 406 | AN0120 |
| 2003 | CONTIG4 | 88654  | 89158  | 0.94 | 1.08E-01 | transcription_start_site | - | 88610  | 88610  | -296  | 407 | AN0121 |
| 2003 | CONTIG4 | 88654  | 89158  | 0.94 | 1.08E-01 | transcription_start_site | - | 88259  | 88259  | -647  | 408 | AN0121 |

|      |         |        |        |      |          |                          |   |        |        |       |     |        |
|------|---------|--------|--------|------|----------|--------------------------|---|--------|--------|-------|-----|--------|
| 2003 | CONTIG4 | 88654  | 89158  | 0.94 | 1.08E-01 | transcription_start_site | + | 89329  | 89329  | -423  | 409 | AN0122 |
| 2003 | CONTIG4 | 88654  | 89158  | 0.94 | 1.08E-01 | transcription_start_site | + | 89862  | 89862  | -956  | 410 | AN0122 |
| 2003 | CONTIG4 | 88654  | 89158  | 0.94 | 1.08E-01 | transcription_start_site | + | 92155  | 92155  | -3249 | 411 | AN0122 |
| 169  | CONTIG4 | 110483 | 111219 | 2.9  | 0.00E+00 | transcription_start_site | - | 105826 | 105826 | -5025 | 422 | AN0127 |
| 169  | CONTIG4 | 110483 | 111219 | 2.9  | 0.00E+00 | transcription_start_site | - | 105717 | 105717 | -5134 | 423 | AN0127 |
| 169  | CONTIG4 | 110483 | 111219 | 2.9  | 0.00E+00 | transcription_start_site | - | 105491 | 105491 | -5360 | 424 | AN0127 |
| 1615 | CONTIG4 | 109428 | 110007 | 1.19 | 4.20E-02 | transcription_start_site | - | 105826 | 105826 | -3891 | 422 | AN0127 |
| 1615 | CONTIG4 | 109428 | 110007 | 1.19 | 4.20E-02 | transcription_start_site | - | 105717 | 105717 | -4000 | 423 | AN0127 |
| 1615 | CONTIG4 | 109428 | 110007 | 1.19 | 4.20E-02 | transcription_start_site | - | 105491 | 105491 | -4226 | 424 | AN0127 |
| 169  | CONTIG4 | 110483 | 111219 | 2.9  | 0.00E+00 | transcription_start_site | + | 109526 | 109526 | 1325  | 431 | AN0128 |
| 1615 | CONTIG4 | 109428 | 110007 | 1.19 | 4.20E-02 | transcription_start_site | + | 109526 | 109526 | 191   | 431 | AN0128 |
| 1615 | CONTIG4 | 109428 | 110007 | 1.19 | 4.20E-02 | transcription_start_site | + | 109162 | 109162 | 555   | 430 | AN0128 |
| 169  | CONTIG4 | 110483 | 111219 | 2.9  | 0.00E+00 | transcription_start_site | + | 112277 | 112277 | -1426 | 432 | AN0129 |
| 169  | CONTIG4 | 110483 | 111219 | 2.9  | 0.00E+00 | transcription_start_site | + | 113083 | 113083 | -2232 | 433 | AN0129 |
| 169  | CONTIG4 | 110483 | 111219 | 2.9  | 0.00E+00 | transcription_start_site | + | 114154 | 114154 | -3303 | 434 | AN0129 |
| 169  | CONTIG4 | 110483 | 111219 | 2.9  | 0.00E+00 | transcription_start_site | + | 114322 | 114322 | -3471 | 435 | AN0129 |
| 169  | CONTIG4 | 110483 | 111219 | 2.9  | 0.00E+00 | transcription_start_site | + | 114433 | 114433 | -3582 | 436 | AN0129 |
| 1615 | CONTIG4 | 109428 | 110007 | 1.19 | 4.20E-02 | transcription_start_site | + | 112277 | 112277 | -2559 | 432 | AN0129 |
| 1615 | CONTIG4 | 109428 | 110007 | 1.19 | 4.20E-02 | transcription_start_site | + | 113083 | 113083 | -3365 | 433 | AN0129 |
| 1615 | CONTIG4 | 109428 | 110007 | 1.19 | 4.20E-02 | transcription_start_site | + | 114154 | 114154 | -4436 | 434 | AN0129 |
| 1615 | CONTIG4 | 109428 | 110007 | 1.19 | 4.20E-02 | transcription_start_site | + | 114322 | 114322 | -4604 | 435 | AN0129 |
| 1615 | CONTIG4 | 109428 | 110007 | 1.19 | 4.20E-02 | transcription_start_site | + | 114433 | 114433 | -4715 | 436 | AN0129 |
| 1865 | CONTIG4 | 128196 | 129293 | 1.03 | 7.66E-02 | transcription_start_site | - | 124818 | 124818 | -3926 | 442 | AN0133 |
| 1865 | CONTIG4 | 128196 | 129293 | 1.03 | 7.66E-02 | transcription_start_site | - | 124447 | 124447 | -4297 | 443 | AN0133 |
| 1865 | CONTIG4 | 128196 | 129293 | 1.03 | 7.66E-02 | transcription_start_site | + | 127704 | 127704 | 1040  | 448 | AN0134 |
| 1865 | CONTIG4 | 128196 | 129293 | 1.03 | 7.66E-02 | transcription_start_site | + | 129728 | 129728 | -983  | 449 | AN0135 |
| 1865 | CONTIG4 | 128196 | 129293 | 1.03 | 7.66E-02 | transcription_start_site | + | 129923 | 129923 | -1178 | 450 | AN0135 |
| 265  | CONTIG4 | 134789 | 135293 | 2.68 | 0.00E+00 | transcription_start_site | - | 134821 | 134821 | -220  | 451 | AN0136 |
| 265  | CONTIG4 | 134789 | 135293 | 2.68 | 0.00E+00 | transcription_start_site | - | 134686 | 134686 | -355  | 452 | AN0136 |
| 265  | CONTIG4 | 134789 | 135293 | 2.68 | 0.00E+00 | transcription_start_site | - | 134458 | 134458 | -583  | 453 | AN0136 |
| 265  | CONTIG4 | 134789 | 135293 | 2.68 | 0.00E+00 | transcription_start_site | + | 135556 | 135556 | -515  | 454 | AN0137 |
| 265  | CONTIG4 | 134789 | 135293 | 2.68 | 0.00E+00 | transcription_start_site | + | 135754 | 135754 | -713  | 455 | AN0137 |
| 265  | CONTIG4 | 134789 | 135293 | 2.68 | 0.00E+00 | transcription_start_site | + | 138649 | 138649 | -3608 | 456 | AN0137 |
| 265  | CONTIG4 | 134789 | 135293 | 2.68 | 0.00E+00 | transcription_start_site | + | 139101 | 139101 | -4060 | 457 | AN0137 |
| 265  | CONTIG4 | 134789 | 135293 | 2.68 | 0.00E+00 | transcription_start_site | + | 139928 | 139928 | -4887 | 458 | AN0138 |
| 265  | CONTIG4 | 134789 | 135293 | 2.68 | 0.00E+00 | transcription_start_site | + | 140037 | 140037 | -4996 | 459 | AN0138 |
| 383  | CONTIG5 | 54909  | 55193  | 2.48 | 7.08E-03 | transcription_start_site | - | 51690  | 51690  | -3361 | 505 | AN0161 |
| 383  | CONTIG5 | 54909  | 55193  | 2.48 | 7.08E-03 | transcription_start_site | - | 51445  | 51445  | -3606 | 506 | AN0161 |
| 383  | CONTIG5 | 54909  | 55193  | 2.48 | 7.08E-03 | transcription_start_site | - | 50643  | 50643  | -4408 | 507 | AN0161 |
| 383  | CONTIG5 | 54909  | 55193  | 2.48 | 7.08E-03 | transcription_start_site | - | 54027  | 54027  | -1024 | 508 | AN0162 |
| 383  | CONTIG5 | 54909  | 55193  | 2.48 | 7.08E-03 | transcription_start_site | - | 53855  | 53855  | -1196 | 509 | AN0162 |
| 383  | CONTIG5 | 54909  | 55193  | 2.48 | 7.08E-03 | transcription_start_site | - | 53576  | 53576  | -1475 | 510 | AN0162 |
| 383  | CONTIG5 | 54909  | 55193  | 2.48 | 7.08E-03 | transcription_start_site | - | 53348  | 53348  | -1703 | 511 | AN0162 |
| 383  | CONTIG5 | 54909  | 55193  | 2.48 | 7.08E-03 | transcription_start_site | - | 52473  | 52473  | -2578 | 512 | AN0162 |
| 383  | CONTIG5 | 54909  | 55193  | 2.48 | 7.08E-03 | transcription_start_site | + | 56587  | 56587  | -1536 | 513 | AN0163 |
| 383  | CONTIG5 | 54909  | 55193  | 2.48 | 7.08E-03 | transcription_start_site | + | 56883  | 56883  | -1832 | 514 | AN0163 |
| 383  | CONTIG5 | 54909  | 55193  | 2.48 | 7.08E-03 | transcription_start_site | + | 57272  | 57272  | -2221 | 515 | AN0163 |
| 383  | CONTIG5 | 54909  | 55193  | 2.48 | 7.08E-03 | transcription_start_site | + | 57378  | 57378  | -2327 | 516 | AN0163 |
| 1315 | CONTIG5 | 67507  | 68016  | 1.43 | 5.49E-02 | transcription_start_site | - | 64652  | 64652  | -3109 | 522 | AN0166 |
| 1315 | CONTIG5 | 67507  | 68016  | 1.43 | 5.49E-02 | transcription_start_site | - | 64584  | 64584  | -3177 | 523 | AN0166 |
| 1315 | CONTIG5 | 67507  | 68016  | 1.43 | 5.49E-02 | transcription_start_site | - | 64253  | 64253  | -3508 | 524 | AN0166 |
| 1315 | CONTIG5 | 67507  | 68016  | 1.43 | 5.49E-02 | transcription_start_site | - | 63281  | 63281  | -4480 | 525 | AN0166 |
| 1196 | CONTIG5 | 70212  | 71304  | 1.53 | 7.66E-02 | transcription_start_site | + | 71382  | 71382  | -624  | 528 | AN0168 |
| 1315 | CONTIG5 | 67507  | 68016  | 1.43 | 5.49E-02 | transcription_start_site | + | 71382  | 71382  | -3620 | 528 | AN0168 |
| 826  | CONTIG5 | 79281  | 79945  | 1.91 | 3.01E-02 | transcription_start_site | - | 74403  | 74403  | -5210 | 529 | AN0169 |
| 1197 | CONTIG5 | 74926  | 75670  | 1.53 | 7.66E-02 | transcription_start_site | - | 74403  | 74403  | -895  | 529 | AN0169 |
| 1415 | CONTIG5 | 74411  | 74750  | 1.34 | 7.38E-02 | transcription_start_site | - | 74403  | 74403  | -177  | 529 | AN0169 |

|      |         |        |        |      |          |                          |   |        |        |       |     |        |
|------|---------|--------|--------|------|----------|--------------------------|---|--------|--------|-------|-----|--------|
| 1196 | CONTIG5 | 70212  | 71304  | 1.53 | 7.66E-02 | transcription_start_site | + | 74428  | 74428  | -3670 | 530 | AN0170 |
| 1196 | CONTIG5 | 70212  | 71304  | 1.53 | 7.66E-02 | transcription_start_site | + | 74725  | 74725  | -3967 | 531 | AN0170 |
| 1196 | CONTIG5 | 70212  | 71304  | 1.53 | 7.66E-02 | transcription_start_site | + | 75007  | 75007  | -4249 | 532 | AN0170 |
| 1197 | CONTIG5 | 74926  | 75670  | 1.53 | 7.66E-02 | transcription_start_site | + | 75007  | 75007  | 291   | 532 | AN0170 |
| 1197 | CONTIG5 | 74926  | 75670  | 1.53 | 7.66E-02 | transcription_start_site | + | 74725  | 74725  | 573   | 531 | AN0170 |
| 1197 | CONTIG5 | 74926  | 75670  | 1.53 | 7.66E-02 | transcription_start_site | + | 74428  | 74428  | 870   | 530 | AN0170 |
| 1415 | CONTIG5 | 74411  | 74750  | 1.34 | 7.38E-02 | transcription_start_site | + | 74725  | 74725  | -144  | 531 | AN0170 |
| 1415 | CONTIG5 | 74411  | 74750  | 1.34 | 7.38E-02 | transcription_start_site | + | 74428  | 74428  | 152   | 530 | AN0170 |
| 1415 | CONTIG5 | 74411  | 74750  | 1.34 | 7.38E-02 | transcription_start_site | + | 75007  | 75007  | -426  | 532 | AN0170 |
| 826  | CONTIG5 | 79281  | 79945  | 1.91 | 3.01E-02 | transcription_start_site | - | 78653  | 78653  | -960  | 533 | AN0171 |
| 826  | CONTIG5 | 79281  | 79945  | 1.91 | 3.01E-02 | transcription_start_site | - | 78439  | 78439  | -1174 | 534 | AN0171 |
| 826  | CONTIG5 | 79281  | 79945  | 1.91 | 3.01E-02 | transcription_start_site | - | 78066  | 78066  | -1547 | 535 | AN0171 |
| 826  | CONTIG5 | 79281  | 79945  | 1.91 | 3.01E-02 | transcription_start_site | - | 77735  | 77735  | -1878 | 536 | AN0171 |
| 1685 | CONTIG5 | 82201  | 82560  | 1.15 | 1.97E-01 | transcription_start_site | - | 78653  | 78653  | -3727 | 533 | AN0171 |
| 1685 | CONTIG5 | 82201  | 82560  | 1.15 | 1.97E-01 | transcription_start_site | - | 78439  | 78439  | -3941 | 534 | AN0171 |
| 1685 | CONTIG5 | 82201  | 82560  | 1.15 | 1.97E-01 | transcription_start_site | - | 78066  | 78066  | -4314 | 535 | AN0171 |
| 1685 | CONTIG5 | 82201  | 82560  | 1.15 | 1.97E-01 | transcription_start_site | - | 77735  | 77735  | -4645 | 536 | AN0171 |
| 826  | CONTIG5 | 79281  | 79945  | 1.91 | 3.01E-02 | transcription_start_site | + | 84692  | 84692  | -5079 | 537 | AN0172 |
| 1685 | CONTIG5 | 82201  | 82560  | 1.15 | 1.97E-01 | transcription_start_site | + | 84692  | 84692  | -2311 | 537 | AN0172 |
| 1685 | CONTIG5 | 82201  | 82560  | 1.15 | 1.97E-01 | transcription_start_site | + | 85191  | 85191  | -2810 | 538 | AN0172 |
| 1685 | CONTIG5 | 82201  | 82560  | 1.15 | 1.97E-01 | transcription_start_site | + | 85439  | 85439  | -3058 | 539 | AN0172 |
| 1361 | CONTIG5 | 89946  | 90277  | 1.39 | 1.08E-01 | transcription_start_site | - | 89706  | 89706  | -405  | 540 | AN0173 |
| 1361 | CONTIG5 | 89946  | 90277  | 1.39 | 1.08E-01 | transcription_start_site | - | 89393  | 89393  | -718  | 541 | AN0173 |
| 1361 | CONTIG5 | 89946  | 90277  | 1.39 | 1.08E-01 | transcription_start_site | - | 88907  | 88907  | -1204 | 542 | AN0173 |
| 1361 | CONTIG5 | 89946  | 90277  | 1.39 | 1.08E-01 | transcription_start_site | - | 87884  | 87884  | -2227 | 543 | AN0173 |
| 1361 | CONTIG5 | 89946  | 90277  | 1.39 | 1.08E-01 | transcription_start_site | + | 90834  | 90834  | -722  | 544 | AN0174 |
| 1361 | CONTIG5 | 89946  | 90277  | 1.39 | 1.08E-01 | transcription_start_site | + | 90924  | 90924  | -812  | 545 | AN0174 |
| 1361 | CONTIG5 | 89946  | 90277  | 1.39 | 1.08E-01 | transcription_start_site | + | 91133  | 91133  | -1021 | 546 | AN0174 |
| 1361 | CONTIG5 | 89946  | 90277  | 1.39 | 1.08E-01 | transcription_start_site | + | 91286  | 91286  | -1174 | 547 | AN0174 |
| 1361 | CONTIG5 | 89946  | 90277  | 1.39 | 1.08E-01 | transcription_start_site | + | 91437  | 91437  | -1325 | 548 | AN0174 |
| 701  | CONTIG5 | 95479  | 95915  | 2.05 | 2.05E-02 | transcription_start_site | + | 97554  | 97554  | -1857 | 549 | AN0176 |
| 701  | CONTIG5 | 95479  | 95915  | 2.05 | 2.05E-02 | transcription_start_site | + | 97929  | 97929  | -2232 | 550 | AN0176 |
| 701  | CONTIG5 | 95479  | 95915  | 2.05 | 2.05E-02 | transcription_start_site | + | 98495  | 98495  | -2798 | 551 | AN0176 |
| 518  | CONTIG5 | 102162 | 102501 | 2.29 | 4.22E-03 | transcription_start_site | - | 100141 | 100141 | -2190 | 552 | AN0177 |
| 518  | CONTIG5 | 102162 | 102501 | 2.29 | 4.22E-03 | transcription_start_site | - | 99939  | 99939  | -2392 | 553 | AN0177 |
| 518  | CONTIG5 | 102162 | 102501 | 2.29 | 4.22E-03 | transcription_start_site | - | 101453 | 101453 | -878  | 554 | AN0178 |
| 518  | CONTIG5 | 102162 | 102501 | 2.29 | 4.22E-03 | transcription_start_site | - | 101034 | 101034 | -1297 | 555 | AN0178 |
| 518  | CONTIG5 | 102162 | 102501 | 2.29 | 4.22E-03 | transcription_start_site | - | 100899 | 100899 | -1432 | 556 | AN0178 |
| 518  | CONTIG5 | 102162 | 102501 | 2.29 | 4.22E-03 | transcription_start_site | + | 105189 | 105189 | -2857 | 557 | AN0179 |
| 518  | CONTIG5 | 102162 | 102501 | 2.29 | 4.22E-03 | transcription_start_site | + | 105671 | 105671 | -3339 | 558 | AN0179 |
| 518  | CONTIG5 | 102162 | 102501 | 2.29 | 4.22E-03 | transcription_start_site | + | 106029 | 106029 | -3697 | 559 | AN0179 |
| 518  | CONTIG5 | 102162 | 102501 | 2.29 | 4.22E-03 | transcription_start_site | + | 106135 | 106135 | -3803 | 560 | AN0179 |
| 518  | CONTIG5 | 102162 | 102501 | 2.29 | 4.22E-03 | transcription_start_site | + | 106296 | 106296 | -3964 | 561 | AN0179 |
| 1547 | CONTIG5 | 110643 | 111062 | 1.24 | 1.54E-01 | transcription_start_site | - | 107468 | 107468 | -3384 | 562 | AN0180 |
| 1547 | CONTIG5 | 110643 | 111062 | 1.24 | 1.54E-01 | transcription_start_site | + | 111931 | 111931 | -1078 | 565 | AN0182 |
| 1547 | CONTIG5 | 110643 | 111062 | 1.24 | 1.54E-01 | transcription_start_site | + | 112073 | 112073 | -1220 | 566 | AN0182 |
| 1547 | CONTIG5 | 110643 | 111062 | 1.24 | 1.54E-01 | transcription_start_site | + | 112247 | 112247 | -1394 | 567 | AN0182 |
| 1547 | CONTIG5 | 110643 | 111062 | 1.24 | 1.54E-01 | transcription_start_site | + | 112585 | 112585 | -1732 | 568 | AN0182 |
| 447  | CONTIG5 | 117920 | 118784 | 2.39 | 1.10E-03 | transcription_start_site | - | 114512 | 114512 | -3840 | 569 | AN0183 |
| 447  | CONTIG5 | 117920 | 118784 | 2.39 | 1.10E-03 | transcription_start_site | - | 114456 | 114456 | -3896 | 570 | AN0183 |
| 447  | CONTIG5 | 117920 | 118784 | 2.39 | 1.10E-03 | transcription_start_site | - | 114211 | 114211 | -4141 | 571 | AN0183 |
| 447  | CONTIG5 | 117920 | 118784 | 2.39 | 1.10E-03 | transcription_start_site | - | 113542 | 113542 | -4810 | 572 | AN0183 |
| 1547 | CONTIG5 | 110643 | 111062 | 1.24 | 1.54E-01 | transcription_start_site | + | 114973 | 114973 | -4120 | 573 | AN0184 |
| 1547 | CONTIG5 | 110643 | 111062 | 1.24 | 1.54E-01 | transcription_start_site | + | 115059 | 115059 | -4206 | 574 | AN0184 |
| 1547 | CONTIG5 | 110643 | 111062 | 1.24 | 1.54E-01 | transcription_start_site | + | 115247 | 115247 | -4394 | 575 | AN0184 |
| 1547 | CONTIG5 | 110643 | 111062 | 1.24 | 1.54E-01 | transcription_start_site | + | 115451 | 115451 | -4598 | 576 | AN0184 |
| 447  | CONTIG5 | 117920 | 118784 | 2.39 | 1.10E-03 | transcription_start_site | - | 117928 | 117928 | -424  | 577 | AN0185 |

|      |         |        |        |      |          |                          |   |        |        |       |     |        |
|------|---------|--------|--------|------|----------|--------------------------|---|--------|--------|-------|-----|--------|
| 447  | CONTIG5 | 117920 | 118784 | 2.39 | 1.10E-03 | transcription_start_site | - | 117831 | 117831 | -521  | 578 | AN0185 |
| 550  | CONTIG5 | 121295 | 121719 | 2.25 | 4.92E-03 | transcription_start_site | - | 117928 | 117928 | -3579 | 577 | AN0185 |
| 550  | CONTIG5 | 121295 | 121719 | 2.25 | 4.92E-03 | transcription_start_site | - | 117831 | 117831 | -3676 | 578 | AN0185 |
| 447  | CONTIG5 | 117920 | 118784 | 2.39 | 1.10E-03 | transcription_start_site | + | 118494 | 118494 | -142  | 579 | AN0186 |
| 447  | CONTIG5 | 117920 | 118784 | 2.39 | 1.10E-03 | transcription_start_site | + | 118696 | 118696 | -344  | 580 | AN0186 |
| 447  | CONTIG5 | 117920 | 118784 | 2.39 | 1.10E-03 | transcription_start_site | + | 119295 | 119295 | -943  | 581 | AN0186 |
| 447  | CONTIG5 | 117920 | 118784 | 2.39 | 1.10E-03 | transcription_start_site | + | 119542 | 119542 | -1190 | 582 | AN0186 |
| 550  | CONTIG5 | 121295 | 121719 | 2.25 | 4.92E-03 | transcription_start_site | - | 121783 | 121783 | 276   | 584 | AN0187 |
| 550  | CONTIG5 | 121295 | 121719 | 2.25 | 4.92E-03 | transcription_start_site | - | 122051 | 122051 | 544   | 583 | AN0187 |
| 1548 | CONTIG5 | 151962 | 152310 | 1.24 | 1.54E-01 | transcription_start_site | - | 147330 | 147330 | -4806 | 615 | AN0198 |
| 1548 | CONTIG5 | 151962 | 152310 | 1.24 | 1.54E-01 | transcription_start_site | - | 151943 | 151943 | -193  | 617 | AN0200 |
| 1548 | CONTIG5 | 151962 | 152310 | 1.24 | 1.54E-01 | transcription_start_site | - | 151606 | 151606 | -530  | 618 | AN0200 |
| 1548 | CONTIG5 | 151962 | 152310 | 1.24 | 1.54E-01 | transcription_start_site | - | 151319 | 151319 | -817  | 619 | AN0200 |
| 1548 | CONTIG5 | 151962 | 152310 | 1.24 | 1.54E-01 | transcription_start_site | - | 152861 | 152861 | 725   | 623 | AN0201 |
| 1548 | CONTIG5 | 151962 | 152310 | 1.24 | 1.54E-01 | transcription_start_site | + | 155411 | 155411 | -3275 | 624 | AN0202 |
| 1548 | CONTIG5 | 151962 | 152310 | 1.24 | 1.54E-01 | transcription_start_site | + | 156044 | 156044 | -3908 | 625 | AN0202 |
| 951  | CONTIG5 | 175358 | 175794 | 1.77 | 4.20E-02 | transcription_start_site | - | 171316 | 171316 | -4260 | 641 | AN0208 |
| 951  | CONTIG5 | 175358 | 175794 | 1.77 | 4.20E-02 | transcription_start_site | - | 171076 | 171076 | -4500 | 642 | AN0208 |
| 951  | CONTIG5 | 175358 | 175794 | 1.77 | 4.20E-02 | transcription_start_site | - | 170763 | 170763 | -4813 | 643 | AN0208 |
| 951  | CONTIG5 | 175358 | 175794 | 1.77 | 4.20E-02 | transcription_start_site | - | 170665 | 170665 | -4911 | 644 | AN0208 |
| 951  | CONTIG5 | 175358 | 175794 | 1.77 | 4.20E-02 | transcription_start_site | - | 170443 | 170443 | -5133 | 645 | AN0208 |
| 951  | CONTIG5 | 175358 | 175794 | 1.77 | 4.20E-02 | transcription_start_site | + | 174644 | 174644 | 932   | 651 | AN0209 |
| 951  | CONTIG5 | 175358 | 175794 | 1.77 | 4.20E-02 | transcription_start_site | + | 176349 | 176349 | -773  | 652 | AN0210 |
| 951  | CONTIG5 | 175358 | 175794 | 1.77 | 4.20E-02 | transcription_start_site | + | 176420 | 176420 | -844  | 653 | AN0210 |
| 951  | CONTIG5 | 175358 | 175794 | 1.77 | 4.20E-02 | transcription_start_site | + | 176504 | 176504 | -928  | 654 | AN0210 |
| 951  | CONTIG5 | 175358 | 175794 | 1.77 | 4.20E-02 | transcription_start_site | + | 176689 | 176689 | -1113 | 655 | AN0210 |
| 951  | CONTIG5 | 175358 | 175794 | 1.77 | 4.20E-02 | transcription_start_site | + | 179705 | 179705 | -4129 | 656 | AN0211 |
| 951  | CONTIG5 | 175358 | 175794 | 1.77 | 4.20E-02 | transcription_start_site | + | 180018 | 180018 | -4442 | 657 | AN0211 |
| 951  | CONTIG5 | 175358 | 175794 | 1.77 | 4.20E-02 | transcription_start_site | + | 180340 | 180340 | -4764 | 658 | AN0211 |
| 64   | CONTIG5 | 185794 | 186125 | 3.2  | 2.06E-04 | transcription_start_site | + | 186301 | 186301 | -341  | 661 | AN0213 |
| 879  | CONTIG5 | 187296 | 187798 | 1.86 | 3.34E-02 | transcription_start_site | + | 186301 | 186301 | 1246  | 661 | AN0213 |
| 64   | CONTIG5 | 185794 | 186125 | 3.2  | 2.06E-04 | transcription_start_site | + | 189660 | 189660 | -3700 | 662 | AN0214 |
| 64   | CONTIG5 | 185794 | 186125 | 3.2  | 2.06E-04 | transcription_start_site | + | 189853 | 189853 | -3893 | 663 | AN0214 |
| 64   | CONTIG5 | 185794 | 186125 | 3.2  | 2.06E-04 | transcription_start_site | + | 191069 | 191069 | -5109 | 664 | AN0214 |
| 879  | CONTIG5 | 187296 | 187798 | 1.86 | 3.34E-02 | transcription_start_site | + | 189660 | 189660 | -2113 | 662 | AN0214 |
| 879  | CONTIG5 | 187296 | 187798 | 1.86 | 3.34E-02 | transcription_start_site | + | 189853 | 189853 | -2306 | 663 | AN0214 |
| 879  | CONTIG5 | 187296 | 187798 | 1.86 | 3.34E-02 | transcription_start_site | + | 191069 | 191069 | -3522 | 664 | AN0214 |
| 1625 | CONTIG5 | 210231 | 210577 | 1.19 | 1.15E-01 | transcription_start_site | + | 210156 | 210156 | 248   | 699 | AN0220 |
| 1625 | CONTIG5 | 210231 | 210577 | 1.19 | 1.15E-01 | transcription_start_site | + | 210719 | 210719 | -315  | 700 | AN0220 |
| 1625 | CONTIG5 | 210231 | 210577 | 1.19 | 1.15E-01 | transcription_start_site | + | 209975 | 209975 | 429   | 698 | AN0220 |
| 1625 | CONTIG5 | 210231 | 210577 | 1.19 | 1.15E-01 | transcription_start_site | + | 210892 | 210892 | -488  | 701 | AN0220 |
| 1625 | CONTIG5 | 210231 | 210577 | 1.19 | 1.15E-01 | transcription_start_site | + | 211408 | 211408 | -1004 | 702 | AN0220 |
| 1625 | CONTIG5 | 210231 | 210577 | 1.19 | 1.15E-01 | transcription_start_site | + | 213179 | 213179 | -2775 | 703 | AN0221 |
| 1625 | CONTIG5 | 210231 | 210577 | 1.19 | 1.15E-01 | transcription_start_site | + | 213242 | 213242 | -2838 | 704 | AN0221 |
| 1625 | CONTIG5 | 210231 | 210577 | 1.19 | 1.15E-01 | transcription_start_site | + | 213580 | 213580 | -3176 | 705 | AN0221 |
| 1625 | CONTIG5 | 210231 | 210577 | 1.19 | 1.15E-01 | transcription_start_site | + | 213672 | 213672 | -3268 | 706 | AN0221 |
| 1484 | CONTIG5 | 233626 | 233902 | 1.29 | 1.38E-01 | transcription_start_site | - | 232898 | 232898 | -866  | 718 | AN0225 |
| 1484 | CONTIG5 | 233626 | 233902 | 1.29 | 1.38E-01 | transcription_start_site | - | 232781 | 232781 | -983  | 719 | AN0225 |
| 1484 | CONTIG5 | 233626 | 233902 | 1.29 | 1.38E-01 | transcription_start_site | + | 234208 | 234208 | -444  | 720 | AN0226 |
| 1484 | CONTIG5 | 233626 | 233902 | 1.29 | 1.38E-01 | transcription_start_site | + | 234457 | 234457 | -693  | 721 | AN0226 |
| 1484 | CONTIG5 | 233626 | 233902 | 1.29 | 1.38E-01 | transcription_start_site | + | 238128 | 238128 | -4364 | 725 | AN0228 |
| 485  | CONTIG5 | 245560 | 245904 | 2.34 | 9.96E-03 | transcription_start_site | - | 245121 | 245121 | -611  | 728 | AN0229 |
| 485  | CONTIG5 | 245560 | 245904 | 2.34 | 9.96E-03 | transcription_start_site | - | 245055 | 245055 | -677  | 729 | AN0229 |
| 485  | CONTIG5 | 245560 | 245904 | 2.34 | 9.96E-03 | transcription_start_site | - | 243598 | 243598 | -2134 | 730 | AN0229 |
| 485  | CONTIG5 | 245560 | 245904 | 2.34 | 9.96E-03 | transcription_start_site | - | 243151 | 243151 | -2581 | 731 | AN0229 |
| 1549 | CONTIG5 | 248345 | 248679 | 1.24 | 1.54E-01 | transcription_start_site | - | 245121 | 245121 | -3391 | 728 | AN0229 |
| 1549 | CONTIG5 | 248345 | 248679 | 1.24 | 1.54E-01 | transcription_start_site | - | 245055 | 245055 | -3457 | 729 | AN0229 |



|      |         |        |        |      |          |                          |   |        |        |       |     |        |
|------|---------|--------|--------|------|----------|--------------------------|---|--------|--------|-------|-----|--------|
| 1549 | CONTIG5 | 248345 | 248679 | 1.24 | 1.54E-01 | transcription_start_site | - | 243598 | 243598 | -4914 | 730 | AN0229 |
| 1549 | CONTIG5 | 248345 | 248679 | 1.24 | 1.54E-01 | transcription_start_site | + | 252166 | 252166 | -3654 | 732 | AN0230 |
| 1549 | CONTIG5 | 248345 | 248679 | 1.24 | 1.54E-01 | transcription_start_site | + | 252330 | 252330 | -3818 | 733 | AN0230 |
| 1549 | CONTIG5 | 248345 | 248679 | 1.24 | 1.54E-01 | transcription_start_site | + | 252469 | 252469 | -3957 | 734 | AN0230 |
| 1549 | CONTIG5 | 248345 | 248679 | 1.24 | 1.54E-01 | transcription_start_site | + | 252610 | 252610 | -4098 | 735 | AN0230 |
| 1549 | CONTIG5 | 248345 | 248679 | 1.24 | 1.54E-01 | transcription_start_site | + | 253422 | 253422 | -4910 | 736 | AN0231 |
| 1549 | CONTIG5 | 248345 | 248679 | 1.24 | 1.54E-01 | transcription_start_site | + | 253581 | 253581 | -5069 | 737 | AN0231 |
| 628  | CONTIG5 | 260115 | 260469 | 2.15 | 1.54E-02 | transcription_start_site | - | 255745 | 255745 | -4547 | 740 | AN0232 |
| 628  | CONTIG5 | 260115 | 260469 | 2.15 | 1.54E-02 | transcription_start_site | - | 255527 | 255527 | -4765 | 741 | AN0232 |
| 628  | CONTIG5 | 260115 | 260469 | 2.15 | 1.54E-02 | transcription_start_site | - | 255354 | 255354 | -4938 | 742 | AN0232 |
| 628  | CONTIG5 | 260115 | 260469 | 2.15 | 1.54E-02 | transcription_start_site | + | 259763 | 259763 | 529   | 752 | AN0234 |
| 628  | CONTIG5 | 260115 | 260469 | 2.15 | 1.54E-02 | transcription_start_site | + | 259496 | 259496 | 796   | 751 | AN0234 |
| 628  | CONTIG5 | 260115 | 260469 | 2.15 | 1.54E-02 | transcription_start_site | + | 259128 | 259128 | 1164  | 750 | AN0234 |
| 628  | CONTIG5 | 260115 | 260469 | 2.15 | 1.54E-02 | transcription_start_site | + | 260478 | 260478 | -186  | 753 | AN0235 |
| 628  | CONTIG5 | 260115 | 260469 | 2.15 | 1.54E-02 | transcription_start_site | + | 262157 | 262157 | -1865 | 754 | AN0235 |
| 628  | CONTIG5 | 260115 | 260469 | 2.15 | 1.54E-02 | transcription_start_site | + | 263534 | 263534 | -3242 | 755 | AN0235 |
| 39   | CONTIG5 | 275558 | 275922 | 3.3  | 2.51E-04 | transcription_start_site | - | 273403 | 273403 | -2337 | 756 | AN0237 |
| 39   | CONTIG5 | 275558 | 275922 | 3.3  | 2.51E-04 | transcription_start_site | - | 273196 | 273196 | -2544 | 757 | AN0237 |
| 39   | CONTIG5 | 275558 | 275922 | 3.3  | 2.51E-04 | transcription_start_site | - | 271367 | 271367 | -4373 | 758 | AN0237 |
| 813  | CONTIG5 | 276378 | 277107 | 1.91 | 4.18E-03 | transcription_start_site | - | 273403 | 273403 | -3339 | 756 | AN0237 |
| 813  | CONTIG5 | 276378 | 277107 | 1.91 | 4.18E-03 | transcription_start_site | - | 273196 | 273196 | -3546 | 757 | AN0237 |
| 1142 | CONTIG5 | 278038 | 278467 | 1.58 | 6.74E-02 | transcription_start_site | - | 273403 | 273403 | -4849 | 756 | AN0237 |
| 1142 | CONTIG5 | 278038 | 278467 | 1.58 | 6.74E-02 | transcription_start_site | - | 273196 | 273196 | -5056 | 757 | AN0237 |
| 39   | CONTIG5 | 275558 | 275922 | 3.3  | 2.51E-04 | transcription_start_site | + | 279748 | 279748 | -4008 | 761 | AN0239 |
| 813  | CONTIG5 | 276378 | 277107 | 1.91 | 4.18E-03 | transcription_start_site | + | 279748 | 279748 | -3005 | 761 | AN0239 |
| 880  | CONTIG5 | 288229 | 288588 | 1.86 | 3.34E-02 | transcription_start_site | + | 287523 | 287523 | 885   | 768 | AN0239 |
| 880  | CONTIG5 | 288229 | 288588 | 1.86 | 3.34E-02 | transcription_start_site | + | 287295 | 287295 | 1113  | 767 | AN0239 |
| 1142 | CONTIG5 | 278038 | 278467 | 1.58 | 6.74E-02 | transcription_start_site | + | 279748 | 279748 | -1495 | 761 | AN0239 |
| 1142 | CONTIG5 | 278038 | 278467 | 1.58 | 6.74E-02 | transcription_start_site | + | 282274 | 282274 | -4021 | 762 | AN0239 |
| 1142 | CONTIG5 | 278038 | 278467 | 1.58 | 6.74E-02 | transcription_start_site | + | 282683 | 282683 | -4430 | 763 | AN0239 |
| 880  | CONTIG5 | 288229 | 288588 | 1.86 | 3.34E-02 | transcription_start_site | + | 288539 | 288539 | -130  | 769 | AN0240 |
| 880  | CONTIG5 | 288229 | 288588 | 1.86 | 3.34E-02 | transcription_start_site | + | 288656 | 288656 | -247  | 770 | AN0240 |
| 880  | CONTIG5 | 288229 | 288588 | 1.86 | 3.34E-02 | transcription_start_site | + | 289020 | 289020 | -611  | 771 | AN0240 |
| 880  | CONTIG5 | 288229 | 288588 | 1.86 | 3.34E-02 | transcription_start_site | + | 289460 | 289460 | -1051 | 772 | AN0240 |
| 1686 | CONTIG5 | 289809 | 290316 | 1.15 | 1.97E-01 | transcription_start_site | + | 289460 | 289460 | 602   | 772 | AN0240 |
| 1686 | CONTIG5 | 289809 | 290316 | 1.15 | 1.97E-01 | transcription_start_site | + | 289020 | 289020 | 1042  | 771 | AN0240 |
| 880  | CONTIG5 | 288229 | 288588 | 1.86 | 3.34E-02 | transcription_start_site | + | 290636 | 290636 | -2227 | 773 | AN0241 |
| 880  | CONTIG5 | 288229 | 288588 | 1.86 | 3.34E-02 | transcription_start_site | + | 291032 | 291032 | -2623 | 774 | AN0241 |
| 880  | CONTIG5 | 288229 | 288588 | 1.86 | 3.34E-02 | transcription_start_site | + | 291418 | 291418 | -3009 | 775 | AN0241 |
| 880  | CONTIG5 | 288229 | 288588 | 1.86 | 3.34E-02 | transcription_start_site | + | 291573 | 291573 | -3164 | 776 | AN0241 |
| 1686 | CONTIG5 | 289809 | 290316 | 1.15 | 1.97E-01 | transcription_start_site | + | 290636 | 290636 | -573  | 773 | AN0241 |
| 1686 | CONTIG5 | 289809 | 290316 | 1.15 | 1.97E-01 | transcription_start_site | + | 291032 | 291032 | -969  | 774 | AN0241 |
| 1686 | CONTIG5 | 289809 | 290316 | 1.15 | 1.97E-01 | transcription_start_site | + | 291418 | 291418 | -1355 | 775 | AN0241 |
| 1686 | CONTIG5 | 289809 | 290316 | 1.15 | 1.97E-01 | transcription_start_site | + | 291573 | 291573 | -1510 | 776 | AN0241 |
| 880  | CONTIG5 | 288229 | 288588 | 1.86 | 3.34E-02 | transcription_start_site | + | 292100 | 292100 | -3691 | 777 | AN0242 |
| 880  | CONTIG5 | 288229 | 288588 | 1.86 | 3.34E-02 | transcription_start_site | + | 292410 | 292410 | -4001 | 778 | AN0242 |
| 1686 | CONTIG5 | 289809 | 290316 | 1.15 | 1.97E-01 | transcription_start_site | + | 292100 | 292100 | -2037 | 777 | AN0242 |
| 1686 | CONTIG5 | 289809 | 290316 | 1.15 | 1.97E-01 | transcription_start_site | + | 292410 | 292410 | -2347 | 778 | AN0242 |
| 1628 | CONTIG5 | 297455 | 297734 | 1.19 | 1.76E-01 | transcription_start_site | + | 296469 | 296469 | 1125  | 782 | AN0243 |
| 1628 | CONTIG5 | 297455 | 297734 | 1.19 | 1.76E-01 | transcription_start_site | + | 297869 | 297869 | -274  | 783 | AN0244 |
| 1628 | CONTIG5 | 297455 | 297734 | 1.19 | 1.76E-01 | transcription_start_site | + | 298273 | 298273 | -678  | 784 | AN0244 |
| 1628 | CONTIG5 | 297455 | 297734 | 1.19 | 1.76E-01 | transcription_start_site | + | 298771 | 298771 | -1176 | 785 | AN0244 |
| 998  | CONTIG5 | 310131 | 310565 | 1.72 | 2.30E-02 | transcription_start_site | - | 309920 | 309920 | -428  | 788 | AN0246 |
| 998  | CONTIG5 | 310131 | 310565 | 1.72 | 2.30E-02 | transcription_start_site | - | 309628 | 309628 | -720  | 789 | AN0246 |
| 998  | CONTIG5 | 310131 | 310565 | 1.72 | 2.30E-02 | transcription_start_site | - | 309305 | 309305 | -1043 | 790 | AN0246 |
| 998  | CONTIG5 | 310131 | 310565 | 1.72 | 2.30E-02 | transcription_start_site | - | 308843 | 308843 | -1505 | 791 | AN0246 |
| 998  | CONTIG5 | 310131 | 310565 | 1.72 | 2.30E-02 | transcription_start_site | - | 308649 | 308649 | -1699 | 792 | AN0246 |

|      |         |        |        |      |          |                          |   |        |        |       |     |        |
|------|---------|--------|--------|------|----------|--------------------------|---|--------|--------|-------|-----|--------|
| 998  | CONTIG5 | 310131 | 310565 | 1.72 | 2.30E-02 | transcription_start_site | - | 308185 | 308185 | -2163 | 793 | AN0246 |
| 998  | CONTIG5 | 310131 | 310565 | 1.72 | 2.30E-02 | transcription_start_site | - | 307975 | 307975 | -2373 | 794 | AN0246 |
| 998  | CONTIG5 | 310131 | 310565 | 1.72 | 2.30E-02 | transcription_start_site | + | 310850 | 310850 | -502  | 795 | AN0247 |
| 998  | CONTIG5 | 310131 | 310565 | 1.72 | 2.30E-02 | transcription_start_site | + | 313929 | 313929 | -3581 | 796 | AN0247 |
| 998  | CONTIG5 | 310131 | 310565 | 1.72 | 2.30E-02 | transcription_start_site | + | 314221 | 314221 | -3873 | 797 | AN0247 |
| 1198 | CONTIG5 | 333242 | 333583 | 1.53 | 7.66E-02 | transcription_start_site | - | 331030 | 331030 | -2382 | 831 | AN0254 |
| 1198 | CONTIG5 | 333242 | 333583 | 1.53 | 7.66E-02 | transcription_start_site | - | 330912 | 330912 | -2500 | 832 | AN0254 |
| 1198 | CONTIG5 | 333242 | 333583 | 1.53 | 7.66E-02 | transcription_start_site | - | 330685 | 330685 | -2727 | 833 | AN0254 |
| 1687 | CONTIG5 | 339827 | 340181 | 1.15 | 1.97E-01 | transcription_start_site | - | 336841 | 336841 | -3163 | 834 | AN0255 |
| 1687 | CONTIG5 | 339827 | 340181 | 1.15 | 1.97E-01 | transcription_start_site | - | 336675 | 336675 | -3329 | 835 | AN0255 |
| 1687 | CONTIG5 | 339827 | 340181 | 1.15 | 1.97E-01 | transcription_start_site | - | 336504 | 336504 | -3500 | 836 | AN0255 |
| 1687 | CONTIG5 | 339827 | 340181 | 1.15 | 1.97E-01 | transcription_start_site | - | 336305 | 336305 | -3699 | 837 | AN0255 |
| 1687 | CONTIG5 | 339827 | 340181 | 1.15 | 1.97E-01 | transcription_start_site | - | 339840 | 339840 | -164  | 838 | AN0256 |
| 1687 | CONTIG5 | 339827 | 340181 | 1.15 | 1.97E-01 | transcription_start_site | - | 339736 | 339736 | -268  | 839 | AN0256 |
| 1687 | CONTIG5 | 339827 | 340181 | 1.15 | 1.97E-01 | transcription_start_site | - | 339280 | 339280 | -724  | 840 | AN0256 |
| 1687 | CONTIG5 | 339827 | 340181 | 1.15 | 1.97E-01 | transcription_start_site | - | 339005 | 339005 | -999  | 841 | AN0256 |
| 1687 | CONTIG5 | 339827 | 340181 | 1.15 | 1.97E-01 | transcription_start_site | + | 340652 | 340652 | -648  | 842 | AN0257 |
| 1687 | CONTIG5 | 339827 | 340181 | 1.15 | 1.97E-01 | transcription_start_site | + | 340824 | 340824 | -820  | 843 | AN0257 |
| 1687 | CONTIG5 | 339827 | 340181 | 1.15 | 1.97E-01 | transcription_start_site | + | 341428 | 341428 | -1424 | 844 | AN0257 |
| 1687 | CONTIG5 | 339827 | 340181 | 1.15 | 1.97E-01 | transcription_start_site | + | 341717 | 341717 | -1713 | 845 | AN0257 |
| 1687 | CONTIG5 | 339827 | 340181 | 1.15 | 1.97E-01 | transcription_start_site | + | 342207 | 342207 | -2203 | 846 | AN0258 |
| 1687 | CONTIG5 | 339827 | 340181 | 1.15 | 1.97E-01 | transcription_start_site | + | 342760 | 342760 | -2756 | 847 | AN0258 |
| 1687 | CONTIG5 | 339827 | 340181 | 1.15 | 1.97E-01 | transcription_start_site | + | 345039 | 345039 | -5035 | 850 | AN0260 |
| 149  | CONTIG5 | 354532 | 354966 | 2.96 | 1.45E-03 | transcription_start_site | + | 353725 | 353725 | 1024  | 868 | AN0263 |
| 149  | CONTIG5 | 354532 | 354966 | 2.96 | 1.45E-03 | transcription_start_site | - | 355412 | 355412 | 663   | 871 | AN0264 |
| 149  | CONTIG5 | 354532 | 354966 | 2.96 | 1.45E-03 | transcription_start_site | - | 355499 | 355499 | 750   | 870 | AN0264 |
| 149  | CONTIG5 | 354532 | 354966 | 2.96 | 1.45E-03 | transcription_start_site | - | 355888 | 355888 | 1139  | 869 | AN0264 |
| 149  | CONTIG5 | 354532 | 354966 | 2.96 | 1.45E-03 | transcription_start_site | + | 356551 | 356551 | -1802 | 872 | AN0265 |
| 149  | CONTIG5 | 354532 | 354966 | 2.96 | 1.45E-03 | transcription_start_site | + | 358134 | 358134 | -3385 | 873 | AN0265 |
| 149  | CONTIG5 | 354532 | 354966 | 2.96 | 1.45E-03 | transcription_start_site | + | 358368 | 358368 | -3619 | 874 | AN0265 |
| 149  | CONTIG5 | 354532 | 354966 | 2.96 | 1.45E-03 | transcription_start_site | + | 359530 | 359530 | -4781 | 875 | AN0265 |
| 520  | CONTIG5 | 377402 | 377686 | 2.29 | 1.06E-02 | transcription_start_site | - | 373231 | 373231 | -4313 | 890 | AN0271 |
| 520  | CONTIG5 | 377402 | 377686 | 2.29 | 1.06E-02 | transcription_start_site | - | 372793 | 372793 | -4751 | 891 | AN0271 |
| 520  | CONTIG5 | 377402 | 377686 | 2.29 | 1.06E-02 | transcription_start_site | - | 372570 | 372570 | -4974 | 892 | AN0271 |
| 520  | CONTIG5 | 377402 | 377686 | 2.29 | 1.06E-02 | transcription_start_site | + | 379900 | 379900 | -2356 | 896 | AN0273 |
| 520  | CONTIG5 | 377402 | 377686 | 2.29 | 1.06E-02 | transcription_start_site | + | 381111 | 381111 | -3567 | 897 | AN0273 |
| 520  | CONTIG5 | 377402 | 377686 | 2.29 | 1.06E-02 | transcription_start_site | + | 381358 | 381358 | -3814 | 898 | AN0273 |
| 448  | CONTIG5 | 384379 | 384743 | 2.39 | 3.99E-03 | transcription_start_site | - | 383466 | 383466 | -1095 | 899 | AN0274 |
| 448  | CONTIG5 | 384379 | 384743 | 2.39 | 3.99E-03 | transcription_start_site | - | 383302 | 383302 | -1259 | 900 | AN0274 |
| 448  | CONTIG5 | 384379 | 384743 | 2.39 | 3.99E-03 | transcription_start_site | - | 381944 | 381944 | -2617 | 901 | AN0274 |
| 448  | CONTIG5 | 384379 | 384743 | 2.39 | 3.99E-03 | transcription_start_site | + | 387154 | 387154 | -2593 | 906 | AN0276 |
| 448  | CONTIG5 | 384379 | 384743 | 2.39 | 3.99E-03 | transcription_start_site | + | 387358 | 387358 | -2797 | 907 | AN0276 |
| 448  | CONTIG5 | 384379 | 384743 | 2.39 | 3.99E-03 | transcription_start_site | + | 387774 | 387774 | -3213 | 908 | AN0276 |
| 298  | CONTIG5 | 402751 | 403265 | 2.63 | 1.41E-03 | transcription_start_site | - | 402316 | 402316 | -692  | 913 | AN0279 |
| 357  | CONTIG5 | 405686 | 406185 | 2.53 | 6.24E-03 | transcription_start_site | - | 402316 | 402316 | -3619 | 913 | AN0279 |
| 947  | CONTIG5 | 406371 | 407755 | 1.77 | 9.64E-03 | transcription_start_site | - | 402316 | 402316 | -4747 | 913 | AN0279 |
| 1143 | CONTIG5 | 403671 | 404835 | 1.58 | 6.74E-02 | transcription_start_site | - | 402316 | 402316 | -1937 | 913 | AN0279 |
| 1626 | CONTIG5 | 400671 | 401675 | 1.19 | 1.15E-01 | transcription_start_site | - | 402316 | 402316 | 1143  | 913 | AN0279 |
| 1056 | CONTIG5 | 420167 | 420506 | 1.67 | 5.36E-02 | transcription_start_site | - | 418871 | 418871 | -1465 | 919 | AN0282 |
| 1056 | CONTIG5 | 420167 | 420506 | 1.67 | 5.36E-02 | transcription_start_site | - | 418738 | 418738 | -1598 | 920 | AN0282 |
| 1056 | CONTIG5 | 420167 | 420506 | 1.67 | 5.36E-02 | transcription_start_site | - | 418527 | 418527 | -1809 | 921 | AN0282 |
| 1056 | CONTIG5 | 420167 | 420506 | 1.67 | 5.36E-02 | transcription_start_site | - | 418281 | 418281 | -2055 | 922 | AN0282 |
| 1056 | CONTIG5 | 420167 | 420506 | 1.67 | 5.36E-02 | transcription_start_site | - | 417045 | 417045 | -3291 | 923 | AN0282 |
| 1144 | CONTIG5 | 428405 | 428679 | 1.58 | 6.74E-02 | transcription_start_site | - | 428454 | 428454 | -88   | 925 | AN0283 |
| 1144 | CONTIG5 | 428405 | 428679 | 1.58 | 6.74E-02 | transcription_start_site | - | 428778 | 428778 | 236   | 924 | AN0283 |
| 1144 | CONTIG5 | 428405 | 428679 | 1.58 | 6.74E-02 | transcription_start_site | - | 428265 | 428265 | -277  | 926 | AN0283 |
| 1144 | CONTIG5 | 428405 | 428679 | 1.58 | 6.74E-02 | transcription_start_site | - | 428174 | 428174 | -368  | 927 | AN0283 |

|      |         |        |        |      |          |                          |   |        |        |       |     |        |
|------|---------|--------|--------|------|----------|--------------------------|---|--------|--------|-------|-----|--------|
| 1144 | CONTIG5 | 428405 | 428679 | 1.58 | 6.74E-02 | transcription_start_site | - | 427915 | 427915 | -627  | 928 | AN0283 |
| 1144 | CONTIG5 | 428405 | 428679 | 1.58 | 6.74E-02 | transcription_start_site | + | 432041 | 432041 | -3499 | 929 | AN0284 |
| 1144 | CONTIG5 | 428405 | 428679 | 1.58 | 6.74E-02 | transcription_start_site | + | 432553 | 432553 | -4011 | 930 | AN0284 |
| 1144 | CONTIG5 | 428405 | 428679 | 1.58 | 6.74E-02 | transcription_start_site | + | 432972 | 432972 | -4430 | 931 | AN0284 |
| 1144 | CONTIG5 | 428405 | 428679 | 1.58 | 6.74E-02 | transcription_start_site | + | 433095 | 433095 | -4553 | 932 | AN0284 |
| 1144 | CONTIG5 | 428405 | 428679 | 1.58 | 6.74E-02 | transcription_start_site | + | 433320 | 433320 | -4778 | 933 | AN0284 |
| 1144 | CONTIG5 | 428405 | 428679 | 1.58 | 6.74E-02 | transcription_start_site | + | 433608 | 433608 | -5066 | 934 | AN0284 |
| 739  | CONTIG5 | 440266 | 440920 | 2.01 | 1.06E-02 | transcription_start_site | - | 437181 | 437181 | -3412 | 937 | AN0285 |
| 1416 | CONTIG5 | 437176 | 437539 | 1.34 | 7.38E-02 | transcription_start_site | - | 437181 | 437181 | -176  | 937 | AN0285 |
| 1416 | CONTIG5 | 437176 | 437539 | 1.34 | 7.38E-02 | transcription_start_site | + | 438008 | 438008 | -650  | 938 | AN0286 |
| 1416 | CONTIG5 | 437176 | 437539 | 1.34 | 7.38E-02 | transcription_start_site | + | 438108 | 438108 | -750  | 939 | AN0286 |
| 739  | CONTIG5 | 440266 | 440920 | 2.01 | 1.06E-02 | transcription_start_site | + | 441254 | 441254 | -661  | 940 | AN0287 |
| 739  | CONTIG5 | 440266 | 440920 | 2.01 | 1.06E-02 | transcription_start_site | + | 441506 | 441506 | -913  | 941 | AN0287 |
| 739  | CONTIG5 | 440266 | 440920 | 2.01 | 1.06E-02 | transcription_start_site | + | 444319 | 444319 | -3726 | 942 | AN0287 |
| 739  | CONTIG5 | 440266 | 440920 | 2.01 | 1.06E-02 | transcription_start_site | + | 444642 | 444642 | -4049 | 943 | AN0287 |
| 739  | CONTIG5 | 440266 | 440920 | 2.01 | 1.06E-02 | transcription_start_site | + | 444840 | 444840 | -4247 | 944 | AN0287 |
| 1316 | CONTIG5 | 445138 | 445570 | 1.43 | 5.49E-02 | transcription_start_site | + | 444840 | 444840 | 514   | 944 | AN0287 |
| 1316 | CONTIG5 | 445138 | 445570 | 1.43 | 5.49E-02 | transcription_start_site | + | 444642 | 444642 | 712   | 943 | AN0287 |
| 1316 | CONTIG5 | 445138 | 445570 | 1.43 | 5.49E-02 | transcription_start_site | + | 444319 | 444319 | 1035  | 942 | AN0287 |
| 1416 | CONTIG5 | 437176 | 437539 | 1.34 | 7.38E-02 | transcription_start_site | + | 441254 | 441254 | -3896 | 940 | AN0287 |
| 1416 | CONTIG5 | 437176 | 437539 | 1.34 | 7.38E-02 | transcription_start_site | + | 441506 | 441506 | -4148 | 941 | AN0287 |
| 1316 | CONTIG5 | 445138 | 445570 | 1.43 | 5.49E-02 | transcription_start_site | + | 446182 | 446182 | -828  | 945 | AN0288 |
| 1316 | CONTIG5 | 445138 | 445570 | 1.43 | 5.49E-02 | transcription_start_site | + | 448077 | 448077 | -2723 | 946 | AN0288 |
| 1990 | CONTIG6 | 10596  | 11000  | 0.95 | 1.54E-01 | transcription_start_site | - | 5879   | 5879   | -4919 | 953 | AN0291 |
| 1990 | CONTIG6 | 10596  | 11000  | 0.95 | 1.54E-01 | transcription_start_site | - | 5714   | 5714   | -5084 | 954 | AN0291 |
| 1990 | CONTIG6 | 10596  | 11000  | 0.95 | 1.54E-01 | transcription_start_site | - | 10645  | 10645  | -153  | 957 | AN0293 |
| 1990 | CONTIG6 | 10596  | 11000  | 0.95 | 1.54E-01 | transcription_start_site | - | 10347  | 10347  | -451  | 958 | AN0293 |
| 1990 | CONTIG6 | 10596  | 11000  | 0.95 | 1.54E-01 | transcription_start_site | - | 9823   | 9823   | -975  | 959 | AN0293 |
| 1990 | CONTIG6 | 10596  | 11000  | 0.95 | 1.54E-01 | transcription_start_site | - | 9676   | 9676   | -1122 | 960 | AN0293 |
| 1990 | CONTIG6 | 10596  | 11000  | 0.95 | 1.54E-01 | transcription_start_site | - | 9355   | 9355   | -1443 | 961 | AN0293 |
| 1990 | CONTIG6 | 10596  | 11000  | 0.95 | 1.54E-01 | transcription_start_site | + | 11047  | 11047  | -249  | 962 | AN0294 |
| 1990 | CONTIG6 | 10596  | 11000  | 0.95 | 1.54E-01 | transcription_start_site | + | 11239  | 11239  | -441  | 963 | AN0294 |
| 1098 | CONTIG6 | 17557  | 18136  | 1.61 | 7.36E-03 | transcription_start_site | - | 15232  | 15232  | -2614 | 964 | AN0295 |
| 1098 | CONTIG6 | 17557  | 18136  | 1.61 | 7.36E-03 | transcription_start_site | - | 15061  | 15061  | -2785 | 965 | AN0295 |
| 1098 | CONTIG6 | 17557  | 18136  | 1.61 | 7.36E-03 | transcription_start_site | - | 14879  | 14879  | -2967 | 966 | AN0295 |
| 1098 | CONTIG6 | 17557  | 18136  | 1.61 | 7.36E-03 | transcription_start_site | - | 13345  | 13345  | -4501 | 967 | AN0295 |
| 2103 | CONTIG6 | 19667  | 20009  | 0.88 | 1.97E-01 | transcription_start_site | - | 15232  | 15232  | -4606 | 964 | AN0295 |
| 2103 | CONTIG6 | 19667  | 20009  | 0.88 | 1.97E-01 | transcription_start_site | - | 15061  | 15061  | -4777 | 965 | AN0295 |
| 2103 | CONTIG6 | 19667  | 20009  | 0.88 | 1.97E-01 | transcription_start_site | - | 14879  | 14879  | -4959 | 966 | AN0295 |
| 1990 | CONTIG6 | 10596  | 11000  | 0.95 | 1.54E-01 | transcription_start_site | + | 15564  | 15564  | -4766 | 968 | AN0296 |
| 1098 | CONTIG6 | 17557  | 18136  | 1.61 | 7.36E-03 | transcription_start_site | - | 17537  | 17537  | -309  | 969 | AN0297 |
| 1098 | CONTIG6 | 17557  | 18136  | 1.61 | 7.36E-03 | transcription_start_site | - | 17440  | 17440  | -406  | 970 | AN0297 |
| 1098 | CONTIG6 | 17557  | 18136  | 1.61 | 7.36E-03 | transcription_start_site | - | 17090  | 17090  | -756  | 971 | AN0297 |
| 1098 | CONTIG6 | 17557  | 18136  | 1.61 | 7.36E-03 | transcription_start_site | - | 16846  | 16846  | -1000 | 972 | AN0297 |
| 2103 | CONTIG6 | 19667  | 20009  | 0.88 | 1.97E-01 | transcription_start_site | - | 17537  | 17537  | -2301 | 969 | AN0297 |
| 2103 | CONTIG6 | 19667  | 20009  | 0.88 | 1.97E-01 | transcription_start_site | - | 17440  | 17440  | -2398 | 970 | AN0297 |
| 2103 | CONTIG6 | 19667  | 20009  | 0.88 | 1.97E-01 | transcription_start_site | - | 17090  | 17090  | -2748 | 971 | AN0297 |
| 2103 | CONTIG6 | 19667  | 20009  | 0.88 | 1.97E-01 | transcription_start_site | - | 16846  | 16846  | -2992 | 972 | AN0297 |
| 2103 | CONTIG6 | 19667  | 20009  | 0.88 | 1.97E-01 | transcription_start_site | - | 19680  | 19680  | -158  | 973 | AN0298 |
| 1098 | CONTIG6 | 17557  | 18136  | 1.61 | 7.36E-03 | transcription_start_site | + | 21358  | 21358  | -3511 | 974 | AN0299 |
| 1098 | CONTIG6 | 17557  | 18136  | 1.61 | 7.36E-03 | transcription_start_site | + | 21627  | 21627  | -3780 | 975 | AN0299 |
| 1098 | CONTIG6 | 17557  | 18136  | 1.61 | 7.36E-03 | transcription_start_site | + | 21720  | 21720  | -3873 | 976 | AN0299 |
| 1098 | CONTIG6 | 17557  | 18136  | 1.61 | 7.36E-03 | transcription_start_site | + | 22003  | 22003  | -4156 | 977 | AN0299 |
| 2103 | CONTIG6 | 19667  | 20009  | 0.88 | 1.97E-01 | transcription_start_site | + | 21358  | 21358  | -1520 | 974 | AN0299 |
| 2103 | CONTIG6 | 19667  | 20009  | 0.88 | 1.97E-01 | transcription_start_site | + | 21627  | 21627  | -1789 | 975 | AN0299 |
| 2103 | CONTIG6 | 19667  | 20009  | 0.88 | 1.97E-01 | transcription_start_site | + | 21720  | 21720  | -1882 | 976 | AN0299 |
| 2103 | CONTIG6 | 19667  | 20009  | 0.88 | 1.97E-01 | transcription_start_site | + | 22003  | 22003  | -2165 | 977 | AN0299 |

|      |         |        |        |      |          |                          |   |        |        |       |      |        |
|------|---------|--------|--------|------|----------|--------------------------|---|--------|--------|-------|------|--------|
| 633  | CONTIG6 | 27459  | 27953  | 2.13 | 0.00E+00 | transcription_start_site | - | 24598  | 24598  | -3108 | 978  | AN0300 |
| 633  | CONTIG6 | 27459  | 27953  | 2.13 | 0.00E+00 | transcription_start_site | - | 24340  | 24340  | -3366 | 979  | AN0300 |
| 633  | CONTIG6 | 27459  | 27953  | 2.13 | 0.00E+00 | transcription_start_site | - | 26380  | 26380  | -1326 | 980  | AN0301 |
| 633  | CONTIG6 | 27459  | 27953  | 2.13 | 0.00E+00 | transcription_start_site | - | 26175  | 26175  | -1531 | 981  | AN0301 |
| 633  | CONTIG6 | 27459  | 27953  | 2.13 | 0.00E+00 | transcription_start_site | - | 25706  | 25706  | -2000 | 982  | AN0301 |
| 633  | CONTIG6 | 27459  | 27953  | 2.13 | 0.00E+00 | transcription_start_site | - | 25527  | 25527  | -2179 | 983  | AN0301 |
| 791  | CONTIG6 | 32104  | 32528  | 1.95 | 6.24E-03 | transcription_start_site | - | 31222  | 31222  | -1094 | 984  | AN0302 |
| 791  | CONTIG6 | 32104  | 32528  | 1.95 | 6.24E-03 | transcription_start_site | - | 29119  | 29119  | -3197 | 985  | AN0302 |
| 791  | CONTIG6 | 32104  | 32528  | 1.95 | 6.24E-03 | transcription_start_site | + | 35457  | 35457  | -3141 | 990  | AN0304 |
| 791  | CONTIG6 | 32104  | 32528  | 1.95 | 6.24E-03 | transcription_start_site | + | 35793  | 35793  | -3477 | 991  | AN0304 |
| 791  | CONTIG6 | 32104  | 32528  | 1.95 | 6.24E-03 | transcription_start_site | + | 36396  | 36396  | -4080 | 992  | AN0304 |
| 154  | CONTIG6 | 55438  | 55867  | 2.94 | 0.00E+00 | transcription_start_site | - | 51985  | 51985  | -3667 | 1003 | AN0309 |
| 154  | CONTIG6 | 55438  | 55867  | 2.94 | 0.00E+00 | transcription_start_site | - | 51888  | 51888  | -3764 | 1004 | AN0309 |
| 1864 | CONTIG6 | 56633  | 57523  | 1.03 | 7.38E-02 | transcription_start_site | - | 51985  | 51985  | -5093 | 1003 | AN0309 |
| 1864 | CONTIG6 | 56633  | 57523  | 1.03 | 7.38E-02 | transcription_start_site | - | 51888  | 51888  | -5190 | 1004 | AN0309 |
| 154  | CONTIG6 | 55438  | 55867  | 2.94 | 0.00E+00 | transcription_start_site | + | 56422  | 56422  | -769  | 1007 | AN0311 |
| 1864 | CONTIG6 | 56633  | 57523  | 1.03 | 7.38E-02 | transcription_start_site | + | 56422  | 56422  | 656   | 1007 | AN0311 |
| 154  | CONTIG6 | 55438  | 55867  | 2.94 | 0.00E+00 | transcription_start_site | + | 58110  | 58110  | -2457 | 1008 | AN0312 |
| 1864 | CONTIG6 | 56633  | 57523  | 1.03 | 7.38E-02 | transcription_start_site | + | 58110  | 58110  | -1032 | 1008 | AN0312 |
| 722  | CONTIG6 | 61884  | 62158  | 2.02 | 4.57E-03 | transcription_start_site | - | 61540  | 61540  | -481  | 1009 | AN0313 |
| 722  | CONTIG6 | 61884  | 62158  | 2.02 | 4.57E-03 | transcription_start_site | + | 62425  | 62425  | -404  | 1010 | AN0314 |
| 1864 | CONTIG6 | 56633  | 57523  | 1.03 | 7.38E-02 | transcription_start_site | + | 62425  | 62425  | -5347 | 1010 | AN0314 |
| 1495 | CONTIG6 | 66680  | 67044  | 1.28 | 5.36E-02 | transcription_start_site | - | 66575  | 66575  | -287  | 1011 | AN0315 |
| 1495 | CONTIG6 | 66680  | 67044  | 1.28 | 5.36E-02 | transcription_start_site | - | 66223  | 66223  | -639  | 1012 | AN0315 |
| 1495 | CONTIG6 | 66680  | 67044  | 1.28 | 5.36E-02 | transcription_start_site | + | 67386  | 67386  | -524  | 1013 | AN0316 |
| 1495 | CONTIG6 | 66680  | 67044  | 1.28 | 5.36E-02 | transcription_start_site | + | 67474  | 67474  | -612  | 1014 | AN0316 |
| 1495 | CONTIG6 | 66680  | 67044  | 1.28 | 5.36E-02 | transcription_start_site | + | 67622  | 67622  | -760  | 1015 | AN0316 |
| 1495 | CONTIG6 | 66680  | 67044  | 1.28 | 5.36E-02 | transcription_start_site | + | 67755  | 67755  | -893  | 1016 | AN0316 |
| 1495 | CONTIG6 | 66680  | 67044  | 1.28 | 5.36E-02 | transcription_start_site | + | 67900  | 67900  | -1038 | 1017 | AN0316 |
| 1495 | CONTIG6 | 66680  | 67044  | 1.28 | 5.36E-02 | transcription_start_site | + | 68911  | 68911  | -2049 | 1018 | AN0316 |
| 1495 | CONTIG6 | 66680  | 67044  | 1.28 | 5.36E-02 | transcription_start_site | + | 69872  | 69872  | -3010 | 1019 | AN0317 |
| 1495 | CONTIG6 | 66680  | 67044  | 1.28 | 5.36E-02 | transcription_start_site | + | 70003  | 70003  | -3141 | 1020 | AN0317 |
| 1495 | CONTIG6 | 66680  | 67044  | 1.28 | 5.36E-02 | transcription_start_site | + | 70233  | 70233  | -3371 | 1021 | AN0317 |
| 1495 | CONTIG6 | 66680  | 67044  | 1.28 | 5.36E-02 | transcription_start_site | + | 70477  | 70477  | -3615 | 1022 | AN0317 |
| 1495 | CONTIG6 | 66680  | 67044  | 1.28 | 5.36E-02 | transcription_start_site | + | 70694  | 70694  | -3832 | 1023 | AN0317 |
| 1927 | CONTIG6 | 106815 | 107234 | 0.99 | 1.38E-01 | transcription_start_site | - | 104606 | 104606 | -2418 | 1042 | AN0323 |
| 1927 | CONTIG6 | 106815 | 107234 | 0.99 | 1.38E-01 | transcription_start_site | + | 107815 | 107815 | -790  | 1043 | AN0324 |
| 1927 | CONTIG6 | 106815 | 107234 | 0.99 | 1.38E-01 | transcription_start_site | + | 107930 | 107930 | -905  | 1044 | AN0324 |
| 1927 | CONTIG6 | 106815 | 107234 | 0.99 | 1.38E-01 | transcription_start_site | + | 109711 | 109711 | -2686 | 1045 | AN0325 |
| 1927 | CONTIG6 | 106815 | 107234 | 0.99 | 1.38E-01 | transcription_start_site | + | 109951 | 109951 | -2926 | 1046 | AN0325 |
| 1927 | CONTIG6 | 106815 | 107234 | 0.99 | 1.38E-01 | transcription_start_site | + | 110081 | 110081 | -3056 | 1047 | AN0325 |
| 1927 | CONTIG6 | 106815 | 107234 | 0.99 | 1.38E-01 | transcription_start_site | + | 110317 | 110317 | -3292 | 1048 | AN0325 |
| 1927 | CONTIG6 | 106815 | 107234 | 0.99 | 1.38E-01 | transcription_start_site | + | 110580 | 110580 | -3555 | 1049 | AN0325 |
| 1927 | CONTIG6 | 106815 | 107234 | 0.99 | 1.38E-01 | transcription_start_site | + | 110969 | 110969 | -3944 | 1050 | AN0325 |
| 888  | CONTIG6 | 126242 | 126741 | 1.84 | 3.99E-03 | transcription_start_site | - | 121609 | 121609 | -4882 | 1061 | AN0330 |
| 888  | CONTIG6 | 126242 | 126741 | 1.84 | 3.99E-03 | transcription_start_site | - | 122692 | 122692 | -3799 | 1062 | AN0331 |
| 888  | CONTIG6 | 126242 | 126741 | 1.84 | 3.99E-03 | transcription_start_site | - | 122503 | 122503 | -3988 | 1063 | AN0331 |
| 888  | CONTIG6 | 126242 | 126741 | 1.84 | 3.99E-03 | transcription_start_site | - | 122349 | 122349 | -4142 | 1064 | AN0331 |
| 888  | CONTIG6 | 126242 | 126741 | 1.84 | 3.99E-03 | transcription_start_site | - | 125370 | 125370 | -1121 | 1065 | AN0332 |
| 888  | CONTIG6 | 126242 | 126741 | 1.84 | 3.99E-03 | transcription_start_site | - | 125046 | 125046 | -1445 | 1066 | AN0332 |
| 888  | CONTIG6 | 126242 | 126741 | 1.84 | 3.99E-03 | transcription_start_site | - | 124665 | 124665 | -1826 | 1067 | AN0332 |
| 888  | CONTIG6 | 126242 | 126741 | 1.84 | 3.99E-03 | transcription_start_site | - | 124449 | 124449 | -2042 | 1068 | AN0332 |
| 888  | CONTIG6 | 126242 | 126741 | 1.84 | 3.99E-03 | transcription_start_site | - | 123721 | 123721 | -2770 | 1069 | AN0332 |
| 888  | CONTIG6 | 126242 | 126741 | 1.84 | 3.99E-03 | transcription_start_site | + | 127333 | 127333 | -841  | 1070 | AN0333 |
| 888  | CONTIG6 | 126242 | 126741 | 1.84 | 3.99E-03 | transcription_start_site | + | 127688 | 127688 | -1196 | 1071 | AN0333 |
| 888  | CONTIG6 | 126242 | 126741 | 1.84 | 3.99E-03 | transcription_start_site | + | 128045 | 128045 | -1553 | 1072 | AN0333 |
| 888  | CONTIG6 | 126242 | 126741 | 1.84 | 3.99E-03 | transcription_start_site | + | 128199 | 128199 | -1707 | 1073 | AN0333 |

|      |         |        |        |      |          |                          |   |        |        |       |      |        |
|------|---------|--------|--------|------|----------|--------------------------|---|--------|--------|-------|------|--------|
| 1067 | CONTIG6 | 146633 | 146917 | 1.65 | 1.54E-02 | transcription_start_site | - | 142068 | 142068 | -4707 | 1085 | AN0338 |
| 1067 | CONTIG6 | 146633 | 146917 | 1.65 | 1.54E-02 | transcription_start_site | - | 141761 | 141761 | -5014 | 1086 | AN0338 |
| 1067 | CONTIG6 | 146633 | 146917 | 1.65 | 1.54E-02 | transcription_start_site | - | 146405 | 146405 | -370  | 1094 | AN0339 |
| 1067 | CONTIG6 | 146633 | 146917 | 1.65 | 1.54E-02 | transcription_start_site | - | 144008 | 144008 | -2767 | 1095 | AN0339 |
| 1067 | CONTIG6 | 146633 | 146917 | 1.65 | 1.54E-02 | transcription_start_site | - | 143720 | 143720 | -3055 | 1096 | AN0339 |
| 1067 | CONTIG6 | 146633 | 146917 | 1.65 | 1.54E-02 | transcription_start_site | + | 147198 | 147198 | -423  | 1097 | AN0340 |
| 1067 | CONTIG6 | 146633 | 146917 | 1.65 | 1.54E-02 | transcription_start_site | + | 147896 | 147896 | -1121 | 1098 | AN0340 |
| 2042 | CONTIG6 | 157577 | 157926 | 0.92 | 1.76E-01 | transcription_start_site | - | 153596 | 153596 | -4155 | 1106 | AN0343 |
| 2042 | CONTIG6 | 157577 | 157926 | 0.92 | 1.76E-01 | transcription_start_site | - | 153413 | 153413 | -4338 | 1107 | AN0343 |
| 1593 | CONTIG6 | 175801 | 176087 | 1.21 | 6.74E-02 | transcription_start_site | - | 172233 | 172233 | -3711 | 1119 | AN0349 |
| 1593 | CONTIG6 | 175801 | 176087 | 1.21 | 6.74E-02 | transcription_start_site | - | 171681 | 171681 | -4263 | 1120 | AN0349 |
| 2043 | CONTIG6 | 173551 | 173845 | 0.92 | 1.76E-01 | transcription_start_site | - | 172233 | 172233 | -1465 | 1119 | AN0349 |
| 2043 | CONTIG6 | 173551 | 173845 | 0.92 | 1.76E-01 | transcription_start_site | - | 171681 | 171681 | -2017 | 1120 | AN0349 |
| 1593 | CONTIG6 | 175801 | 176087 | 1.21 | 6.74E-02 | transcription_start_site | - | 173521 | 173521 | -2423 | 1121 | AN0350 |
| 1593 | CONTIG6 | 175801 | 176087 | 1.21 | 6.74E-02 | transcription_start_site | - | 173471 | 173471 | -2473 | 1122 | AN0350 |
| 2043 | CONTIG6 | 173551 | 173845 | 0.92 | 1.76E-01 | transcription_start_site | - | 173521 | 173521 | -177  | 1121 | AN0350 |
| 2043 | CONTIG6 | 173551 | 173845 | 0.92 | 1.76E-01 | transcription_start_site | - | 173471 | 173471 | -227  | 1122 | AN0350 |
| 1593 | CONTIG6 | 175801 | 176087 | 1.21 | 6.74E-02 | transcription_start_site | + | 175507 | 175507 | 437   | 1125 | AN0351 |
| 2043 | CONTIG6 | 173551 | 173845 | 0.92 | 1.76E-01 | transcription_start_site | + | 173978 | 173978 | -280  | 1123 | AN0351 |
| 2043 | CONTIG6 | 173551 | 173845 | 0.92 | 1.76E-01 | transcription_start_site | + | 174308 | 174308 | -610  | 1124 | AN0351 |
| 2043 | CONTIG6 | 173551 | 173845 | 0.92 | 1.76E-01 | transcription_start_site | + | 175507 | 175507 | -1809 | 1125 | AN0351 |
| 504  | CONTIG6 | 184804 | 185230 | 2.31 | 1.09E-03 | transcription_start_site | + | 185614 | 185614 | -597  | 1126 | AN0353 |
| 504  | CONTIG6 | 184804 | 185230 | 2.31 | 1.09E-03 | transcription_start_site | + | 186068 | 186068 | -1051 | 1127 | AN0353 |
| 1231 | CONTIG6 | 194946 | 195286 | 1.5  | 2.63E-02 | transcription_start_site | - | 190006 | 190006 | -5110 | 1128 | AN0354 |
| 1231 | CONTIG6 | 194946 | 195286 | 1.5  | 2.63E-02 | transcription_start_site | - | 189947 | 189947 | -5169 | 1129 | AN0354 |
| 1231 | CONTIG6 | 194946 | 195286 | 1.5  | 2.63E-02 | transcription_start_site | - | 193155 | 193155 | -1961 | 1132 | AN0355 |
| 1231 | CONTIG6 | 194946 | 195286 | 1.5  | 2.63E-02 | transcription_start_site | - | 190709 | 190709 | -4407 | 1133 | AN0355 |
| 1231 | CONTIG6 | 194946 | 195286 | 1.5  | 2.63E-02 | transcription_start_site | + | 195290 | 195290 | -174  | 1134 | AN0356 |
| 1264 | CONTIG6 | 208578 | 208937 | 1.47 | 1.44E-02 | transcription_start_site | - | 206309 | 206309 | -2448 | 1140 | AN0359 |
| 1264 | CONTIG6 | 208578 | 208937 | 1.47 | 1.44E-02 | transcription_start_site | - | 206164 | 206164 | -2593 | 1141 | AN0359 |
| 1264 | CONTIG6 | 208578 | 208937 | 1.47 | 1.44E-02 | transcription_start_site | - | 205900 | 205900 | -2857 | 1142 | AN0359 |
| 1264 | CONTIG6 | 208578 | 208937 | 1.47 | 1.44E-02 | transcription_start_site | - | 204322 | 204322 | -4435 | 1143 | AN0359 |
| 1264 | CONTIG6 | 208578 | 208937 | 1.47 | 1.44E-02 | transcription_start_site | + | 208130 | 208130 | 627   | 1148 | AN0360 |
| 1264 | CONTIG6 | 208578 | 208937 | 1.47 | 1.44E-02 | transcription_start_site | + | 208016 | 208016 | 741   | 1147 | AN0360 |
| 446  | CONTIG6 | 218118 | 218454 | 2.39 | 7.06E-04 | transcription_start_site | - | 214975 | 214975 | -3311 | 1149 | AN0362 |
| 446  | CONTIG6 | 218118 | 218454 | 2.39 | 7.06E-04 | transcription_start_site | - | 214657 | 214657 | -3629 | 1150 | AN0362 |
| 818  | CONTIG6 | 219170 | 219519 | 1.91 | 7.08E-03 | transcription_start_site | - | 214975 | 214975 | -4369 | 1149 | AN0362 |
| 818  | CONTIG6 | 219170 | 219519 | 1.91 | 7.08E-03 | transcription_start_site | - | 214657 | 214657 | -4687 | 1150 | AN0362 |
| 446  | CONTIG6 | 218118 | 218454 | 2.39 | 7.06E-04 | transcription_start_site | - | 217321 | 217321 | -965  | 1151 | AN0363 |
| 446  | CONTIG6 | 218118 | 218454 | 2.39 | 7.06E-04 | transcription_start_site | - | 217035 | 217035 | -1251 | 1152 | AN0363 |
| 446  | CONTIG6 | 218118 | 218454 | 2.39 | 7.06E-04 | transcription_start_site | - | 216902 | 216902 | -1384 | 1153 | AN0363 |
| 446  | CONTIG6 | 218118 | 218454 | 2.39 | 7.06E-04 | transcription_start_site | - | 216340 | 216340 | -1946 | 1154 | AN0363 |
| 818  | CONTIG6 | 219170 | 219519 | 1.91 | 7.08E-03 | transcription_start_site | - | 217321 | 217321 | -2023 | 1151 | AN0363 |
| 818  | CONTIG6 | 219170 | 219519 | 1.91 | 7.08E-03 | transcription_start_site | - | 217035 | 217035 | -2309 | 1152 | AN0363 |
| 818  | CONTIG6 | 219170 | 219519 | 1.91 | 7.08E-03 | transcription_start_site | - | 216902 | 216902 | -2442 | 1153 | AN0363 |
| 818  | CONTIG6 | 219170 | 219519 | 1.91 | 7.08E-03 | transcription_start_site | - | 216340 | 216340 | -3004 | 1154 | AN0363 |
| 929  | CONTIG6 | 221178 | 221692 | 1.8  | 9.96E-03 | transcription_start_site | - | 217321 | 217321 | -4114 | 1151 | AN0363 |
| 929  | CONTIG6 | 221178 | 221692 | 1.8  | 9.96E-03 | transcription_start_site | - | 217035 | 217035 | -4400 | 1152 | AN0363 |
| 929  | CONTIG6 | 221178 | 221692 | 1.8  | 9.96E-03 | transcription_start_site | - | 216902 | 216902 | -4533 | 1153 | AN0363 |
| 929  | CONTIG6 | 221178 | 221692 | 1.8  | 9.96E-03 | transcription_start_site | - | 216340 | 216340 | -5095 | 1154 | AN0363 |
| 446  | CONTIG6 | 218118 | 218454 | 2.39 | 7.06E-04 | transcription_start_site | + | 222001 | 222001 | -3715 | 1155 | AN0364 |
| 446  | CONTIG6 | 218118 | 218454 | 2.39 | 7.06E-04 | transcription_start_site | + | 222225 | 222225 | -3939 | 1156 | AN0364 |
| 818  | CONTIG6 | 219170 | 219519 | 1.91 | 7.08E-03 | transcription_start_site | + | 222001 | 222001 | -2656 | 1155 | AN0364 |
| 818  | CONTIG6 | 219170 | 219519 | 1.91 | 7.08E-03 | transcription_start_site | + | 222225 | 222225 | -2880 | 1156 | AN0364 |
| 929  | CONTIG6 | 221178 | 221692 | 1.8  | 9.96E-03 | transcription_start_site | + | 222001 | 222001 | -566  | 1155 | AN0364 |
| 929  | CONTIG6 | 221178 | 221692 | 1.8  | 9.96E-03 | transcription_start_site | + | 222225 | 222225 | -790  | 1156 | AN0364 |
| 2104 | CONTIG6 | 225243 | 225667 | 0.88 | 1.97E-01 | transcription_start_site | - | 225131 | 225131 | -324  | 1157 | AN0365 |

|              |        |        |      |          |                          |   |        |        |       |             |
|--------------|--------|--------|------|----------|--------------------------|---|--------|--------|-------|-------------|
| 2104 CONTIG6 | 225243 | 225667 | 0.88 | 1.97E-01 | transcription_start_site | - | 225006 | 225006 | -449  | 1158 AN0365 |
| 2104 CONTIG6 | 225243 | 225667 | 0.88 | 1.97E-01 | transcription_start_site | - | 224729 | 224729 | -726  | 1159 AN0365 |
| 1594 CONTIG6 | 230558 | 231057 | 1.21 | 6.74E-02 | transcription_start_site | - | 228027 | 228027 | -2780 | 1160 AN0366 |
| 1594 CONTIG6 | 230558 | 231057 | 1.21 | 6.74E-02 | transcription_start_site | - | 227844 | 227844 | -2963 | 1161 AN0366 |
| 1594 CONTIG6 | 230558 | 231057 | 1.21 | 6.74E-02 | transcription_start_site | - | 227578 | 227578 | -3229 | 1162 AN0366 |
| 1594 CONTIG6 | 230558 | 231057 | 1.21 | 6.74E-02 | transcription_start_site | - | 230262 | 230262 | -545  | 1163 AN0367 |
| 1594 CONTIG6 | 230558 | 231057 | 1.21 | 6.74E-02 | transcription_start_site | + | 232725 | 232725 | -1917 | 1164 AN0368 |
| 1594 CONTIG6 | 230558 | 231057 | 1.21 | 6.74E-02 | transcription_start_site | + | 233145 | 233145 | -2337 | 1165 AN0368 |
| 1594 CONTIG6 | 230558 | 231057 | 1.21 | 6.74E-02 | transcription_start_site | + | 235450 | 235450 | -4642 | 1166 AN0368 |
| 2105 CONTIG6 | 244884 | 245378 | 0.88 | 1.97E-01 | transcription_start_site | - | 244851 | 244851 | -280  | 1178 AN0372 |
| 2105 CONTIG6 | 244884 | 245378 | 0.88 | 1.97E-01 | transcription_start_site | - | 244723 | 244723 | -408  | 1179 AN0372 |
| 2105 CONTIG6 | 244884 | 245378 | 0.88 | 1.97E-01 | transcription_start_site | - | 244622 | 244622 | -509  | 1180 AN0372 |
| 2105 CONTIG6 | 244884 | 245378 | 0.88 | 1.97E-01 | transcription_start_site | - | 244540 | 244540 | -591  | 1181 AN0372 |
| 2105 CONTIG6 | 244884 | 245378 | 0.88 | 1.97E-01 | transcription_start_site | - | 244295 | 244295 | -836  | 1182 AN0372 |
| 2105 CONTIG6 | 244884 | 245378 | 0.88 | 1.97E-01 | transcription_start_site | - | 244190 | 244190 | -941  | 1183 AN0372 |
| 2105 CONTIG6 | 244884 | 245378 | 0.88 | 1.97E-01 | transcription_start_site | - | 243982 | 243982 | -1149 | 1184 AN0372 |
| 134 CONTIG7  | 3226   | 3595   | 2.99 | 0.00E+00 | transcription_start_site | - | 2045   | 2045   | -1365 | 1197 AN0377 |
| 134 CONTIG7  | 3226   | 3595   | 2.99 | 0.00E+00 | transcription_start_site | - | 1460   | 1460   | -1950 | 1198 AN0377 |
| 134 CONTIG7  | 3226   | 3595   | 2.99 | 0.00E+00 | transcription_start_site | + | 2537   | 2537   | 873   | 1200 AN0378 |
| 134 CONTIG7  | 3226   | 3595   | 2.99 | 0.00E+00 | transcription_start_site | + | 2372   | 2372   | 1038  | 1199 AN0378 |
| 134 CONTIG7  | 3226   | 3595   | 2.99 | 0.00E+00 | transcription_start_site | + | 4189   | 4189   | -778  | 1201 AN0379 |
| 134 CONTIG7  | 3226   | 3595   | 2.99 | 0.00E+00 | transcription_start_site | + | 4806   | 4806   | -1395 | 1202 AN0379 |
| 134 CONTIG7  | 3226   | 3595   | 2.99 | 0.00E+00 | transcription_start_site | + | 7815   | 7815   | -4404 | 1206 AN0381 |
| 134 CONTIG7  | 3226   | 3595   | 2.99 | 0.00E+00 | transcription_start_site | + | 7872   | 7872   | -4461 | 1207 AN0381 |
| 134 CONTIG7  | 3226   | 3595   | 2.99 | 0.00E+00 | transcription_start_site | + | 8080   | 8080   | -4669 | 1208 AN0381 |
| 1765 CONTIG7 | 20946  | 21440  | 1.09 | 2.88E-02 | transcription_start_site | - | 19333  | 19333  | -1860 | 1221 AN0385 |
| 1765 CONTIG7 | 20946  | 21440  | 1.09 | 2.88E-02 | transcription_start_site | - | 19186  | 19186  | -2007 | 1222 AN0385 |
| 1765 CONTIG7 | 20946  | 21440  | 1.09 | 2.88E-02 | transcription_start_site | - | 20898  | 20898  | -295  | 1223 AN0386 |
| 1765 CONTIG7 | 20946  | 21440  | 1.09 | 2.88E-02 | transcription_start_site | + | 21503  | 21503  | -310  | 1224 AN0387 |
| 1765 CONTIG7 | 20946  | 21440  | 1.09 | 2.88E-02 | transcription_start_site | + | 22709  | 22709  | -1516 | 1225 AN0387 |
| 1765 CONTIG7 | 20946  | 21440  | 1.09 | 2.88E-02 | transcription_start_site | + | 23984  | 23984  | -2791 | 1226 AN0388 |
| 1765 CONTIG7 | 20946  | 21440  | 1.09 | 2.88E-02 | transcription_start_site | + | 24809  | 24809  | -3616 | 1227 AN0388 |
| 1082 CONTIG7 | 26486  | 26920  | 1.63 | 1.06E-02 | transcription_start_site | + | 27656  | 27656  | -953  | 1228 AN0389 |
| 1518 CONTIG7 | 27318  | 28786  | 1.26 | 4.20E-02 | transcription_start_site | + | 27656  | 27656  | 396   | 1228 AN0389 |
| 864 CONTIG7  | 30752  | 31111  | 1.87 | 4.57E-03 | transcription_start_site | + | 30528  | 30528  | 403   | 1231 AN0390 |
| 864 CONTIG7  | 30752  | 31111  | 1.87 | 4.57E-03 | transcription_start_site | + | 30180  | 30180  | 751   | 1230 AN0390 |
| 1082 CONTIG7 | 26486  | 26920  | 1.63 | 1.06E-02 | transcription_start_site | + | 29574  | 29574  | -2871 | 1229 AN0390 |
| 1082 CONTIG7 | 26486  | 26920  | 1.63 | 1.06E-02 | transcription_start_site | + | 30180  | 30180  | -3477 | 1230 AN0390 |
| 1082 CONTIG7 | 26486  | 26920  | 1.63 | 1.06E-02 | transcription_start_site | + | 30528  | 30528  | -3825 | 1231 AN0390 |
| 1518 CONTIG7 | 27318  | 28786  | 1.26 | 4.20E-02 | transcription_start_site | + | 29574  | 29574  | -1522 | 1229 AN0390 |
| 1518 CONTIG7 | 27318  | 28786  | 1.26 | 4.20E-02 | transcription_start_site | + | 30180  | 30180  | -2128 | 1230 AN0390 |
| 1518 CONTIG7 | 27318  | 28786  | 1.26 | 4.20E-02 | transcription_start_site | + | 30528  | 30528  | -2476 | 1231 AN0390 |
| 864 CONTIG7  | 30752  | 31111  | 1.87 | 4.57E-03 | transcription_start_site | + | 31227  | 31227  | -295  | 1232 AN0391 |
| 864 CONTIG7  | 30752  | 31111  | 1.87 | 4.57E-03 | transcription_start_site | + | 31643  | 31643  | -711  | 1233 AN0391 |
| 1082 CONTIG7 | 26486  | 26920  | 1.63 | 1.06E-02 | transcription_start_site | + | 31227  | 31227  | -4524 | 1232 AN0391 |
| 1082 CONTIG7 | 26486  | 26920  | 1.63 | 1.06E-02 | transcription_start_site | + | 31643  | 31643  | -4940 | 1233 AN0391 |
| 1518 CONTIG7 | 27318  | 28786  | 1.26 | 4.20E-02 | transcription_start_site | + | 31227  | 31227  | -3175 | 1232 AN0391 |
| 1518 CONTIG7 | 27318  | 28786  | 1.26 | 4.20E-02 | transcription_start_site | + | 31643  | 31643  | -3591 | 1233 AN0391 |
| 1079 CONTIG7 | 41267  | 41601  | 1.63 | 4.22E-03 | transcription_start_site | - | 41261  | 41261  | -173  | 1241 AN0393 |
| 1079 CONTIG7 | 41267  | 41601  | 1.63 | 4.22E-03 | transcription_start_site | - | 41098  | 41098  | -336  | 1242 AN0393 |
| 1079 CONTIG7 | 41267  | 41601  | 1.63 | 4.22E-03 | transcription_start_site | - | 40758  | 40758  | -676  | 1243 AN0393 |
| 2179 CONTIG7 | 43807  | 44753  | 0.82 | 1.97E-01 | transcription_start_site | - | 41261  | 41261  | -3019 | 1241 AN0393 |
| 2179 CONTIG7 | 43807  | 44753  | 0.82 | 1.97E-01 | transcription_start_site | - | 41098  | 41098  | -3182 | 1242 AN0393 |
| 2179 CONTIG7 | 43807  | 44753  | 0.82 | 1.97E-01 | transcription_start_site | - | 40758  | 40758  | -3522 | 1243 AN0393 |
| 1079 CONTIG7 | 41267  | 41601  | 1.63 | 4.22E-03 | transcription_start_site | + | 44009  | 44009  | -2575 | 1244 AN0394 |
| 1079 CONTIG7 | 41267  | 41601  | 1.63 | 4.22E-03 | transcription_start_site | + | 44203  | 44203  | -2769 | 1245 AN0394 |
| 1079 CONTIG7 | 41267  | 41601  | 1.63 | 4.22E-03 | transcription_start_site | + | 44727  | 44727  | -3293 | 1246 AN0394 |



|      |         |        |        |      |          |                          |   |       |       |       |      |        |
|------|---------|--------|--------|------|----------|--------------------------|---|-------|-------|-------|------|--------|
| 1079 | CONTIG7 | 41267  | 41601  | 1.63 | 4.22E-03 | transcription_start_site | + | 45205 | 45205 | -3771 | 1247 | AN0394 |
| 1079 | CONTIG7 | 41267  | 41601  | 1.63 | 4.22E-03 | transcription_start_site | + | 45336 | 45336 | -3902 | 1248 | AN0394 |
| 2179 | CONTIG7 | 43807  | 44753  | 0.82 | 1.97E-01 | transcription_start_site | + | 44203 | 44203 | 77    | 1245 | AN0394 |
| 2179 | CONTIG7 | 43807  | 44753  | 0.82 | 1.97E-01 | transcription_start_site | + | 44009 | 44009 | 271   | 1244 | AN0394 |
| 2179 | CONTIG7 | 43807  | 44753  | 0.82 | 1.97E-01 | transcription_start_site | + | 44727 | 44727 | -447  | 1246 | AN0394 |
| 2179 | CONTIG7 | 43807  | 44753  | 0.82 | 1.97E-01 | transcription_start_site | + | 45205 | 45205 | -925  | 1247 | AN0394 |
| 2179 | CONTIG7 | 43807  | 44753  | 0.82 | 1.97E-01 | transcription_start_site | + | 45336 | 45336 | -1056 | 1248 | AN0394 |
| 109  | CONTIG7 | 50705  | 51444  | 3.06 | 0.00E+00 | transcription_start_site | - | 47101 | 47101 | -3973 | 1249 | AN0395 |
| 109  | CONTIG7 | 50705  | 51444  | 3.06 | 0.00E+00 | transcription_start_site | - | 46884 | 46884 | -4190 | 1250 | AN0395 |
| 109  | CONTIG7 | 50705  | 51444  | 3.06 | 0.00E+00 | transcription_start_site | - | 46339 | 46339 | -4735 | 1251 | AN0395 |
| 392  | CONTIG7 | 49727  | 50306  | 2.45 | 0.00E+00 | transcription_start_site | - | 47101 | 47101 | -2915 | 1249 | AN0395 |
| 392  | CONTIG7 | 49727  | 50306  | 2.45 | 0.00E+00 | transcription_start_site | - | 46884 | 46884 | -3132 | 1250 | AN0395 |
| 392  | CONTIG7 | 49727  | 50306  | 2.45 | 0.00E+00 | transcription_start_site | - | 46339 | 46339 | -3677 | 1251 | AN0395 |
| 109  | CONTIG7 | 50705  | 51444  | 3.06 | 0.00E+00 | transcription_start_site | - | 49329 | 49329 | -1745 | 1252 | AN0396 |
| 109  | CONTIG7 | 50705  | 51444  | 3.06 | 0.00E+00 | transcription_start_site | - | 48981 | 48981 | -2093 | 1253 | AN0396 |
| 392  | CONTIG7 | 49727  | 50306  | 2.45 | 0.00E+00 | transcription_start_site | - | 49329 | 49329 | -687  | 1252 | AN0396 |
| 392  | CONTIG7 | 49727  | 50306  | 2.45 | 0.00E+00 | transcription_start_site | - | 48981 | 48981 | -1035 | 1253 | AN0396 |
| 109  | CONTIG7 | 50705  | 51444  | 3.06 | 0.00E+00 | transcription_start_site | + | 50424 | 50424 | 650   | 1255 | AN0397 |
| 109  | CONTIG7 | 50705  | 51444  | 3.06 | 0.00E+00 | transcription_start_site | + | 50073 | 50073 | 1001  | 1254 | AN0397 |
| 392  | CONTIG7 | 49727  | 50306  | 2.45 | 0.00E+00 | transcription_start_site | + | 50073 | 50073 | -56   | 1254 | AN0397 |
| 392  | CONTIG7 | 49727  | 50306  | 2.45 | 0.00E+00 | transcription_start_site | + | 50424 | 50424 | -407  | 1255 | AN0397 |
| 109  | CONTIG7 | 50705  | 51444  | 3.06 | 0.00E+00 | transcription_start_site | + | 56344 | 56344 | -5269 | 1260 | AN0399 |
| 1884 | CONTIG7 | 59345  | 59627  | 1.02 | 9.60E-02 | transcription_start_site | + | 59066 | 59066 | 420   | 1265 | AN0400 |
| 1884 | CONTIG7 | 59345  | 59627  | 1.02 | 9.60E-02 | transcription_start_site | + | 60050 | 60050 | -564  | 1266 | AN0401 |
| 1884 | CONTIG7 | 59345  | 59627  | 1.02 | 9.60E-02 | transcription_start_site | + | 60162 | 60162 | -676  | 1267 | AN0401 |
| 1884 | CONTIG7 | 59345  | 59627  | 1.02 | 9.60E-02 | transcription_start_site | + | 60298 | 60298 | -812  | 1268 | AN0401 |
| 1884 | CONTIG7 | 59345  | 59627  | 1.02 | 9.60E-02 | transcription_start_site | + | 60620 | 60620 | -1134 | 1269 | AN0401 |
| 1884 | CONTIG7 | 59345  | 59627  | 1.02 | 9.60E-02 | transcription_start_site | + | 60778 | 60778 | -1292 | 1270 | AN0401 |
| 1884 | CONTIG7 | 59345  | 59627  | 1.02 | 9.60E-02 | transcription_start_site | + | 61661 | 61661 | -2175 | 1271 | AN0402 |
| 1884 | CONTIG7 | 59345  | 59627  | 1.02 | 9.60E-02 | transcription_start_site | + | 61974 | 61974 | -2488 | 1272 | AN0402 |
| 1884 | CONTIG7 | 59345  | 59627  | 1.02 | 9.60E-02 | transcription_start_site | + | 62157 | 62157 | -2671 | 1273 | AN0402 |
| 1884 | CONTIG7 | 59345  | 59627  | 1.02 | 9.60E-02 | transcription_start_site | + | 62386 | 62386 | -2900 | 1274 | AN0402 |
| 1422 | CONTIG7 | 64144  | 64778  | 1.33 | 3.34E-02 | transcription_start_site | + | 64507 | 64507 | -46   | 1275 | AN0403 |
| 1422 | CONTIG7 | 64144  | 64778  | 1.33 | 3.34E-02 | transcription_start_site | + | 65028 | 65028 | -567  | 1276 | AN0403 |
| 1422 | CONTIG7 | 64144  | 64778  | 1.33 | 3.34E-02 | transcription_start_site | + | 65268 | 65268 | -807  | 1277 | AN0403 |
| 1422 | CONTIG7 | 64144  | 64778  | 1.33 | 3.34E-02 | transcription_start_site | + | 65669 | 65669 | -1208 | 1278 | AN0403 |
| 1422 | CONTIG7 | 64144  | 64778  | 1.33 | 3.34E-02 | transcription_start_site | + | 66444 | 66444 | -1983 | 1279 | AN0403 |
| 1884 | CONTIG7 | 59345  | 59627  | 1.02 | 9.60E-02 | transcription_start_site | + | 64507 | 64507 | -5021 | 1275 | AN0403 |
| 1422 | CONTIG7 | 64144  | 64778  | 1.33 | 3.34E-02 | transcription_start_site | + | 67414 | 67414 | -2953 | 1280 | AN0404 |
| 1422 | CONTIG7 | 64144  | 64778  | 1.33 | 3.34E-02 | transcription_start_site | + | 67565 | 67565 | -3104 | 1281 | AN0404 |
| 1387 | CONTIG7 | 82278  | 82642  | 1.36 | 3.01E-02 | transcription_start_site | - | 82342 | 82342 | -118  | 1292 | AN0408 |
| 1387 | CONTIG7 | 82278  | 82642  | 1.36 | 3.01E-02 | transcription_start_site | - | 80843 | 80843 | -1617 | 1293 | AN0408 |
| 2032 | CONTIG7 | 86704  | 87670  | 0.92 | 6.93E-02 | transcription_start_site | - | 82342 | 82342 | -4845 | 1292 | AN0408 |
| 2037 | CONTIG7 | 84989  | 85568  | 0.92 | 1.38E-01 | transcription_start_site | - | 82342 | 82342 | -2936 | 1292 | AN0408 |
| 2037 | CONTIG7 | 84989  | 85568  | 0.92 | 1.38E-01 | transcription_start_site | - | 80843 | 80843 | -4435 | 1293 | AN0408 |
| 2032 | CONTIG7 | 86704  | 87670  | 0.92 | 6.93E-02 | transcription_start_site | + | 87847 | 87847 | -660  | 1294 | AN0409 |
| 2032 | CONTIG7 | 86704  | 87670  | 0.92 | 6.93E-02 | transcription_start_site | + | 87969 | 87969 | -782  | 1295 | AN0409 |
| 2037 | CONTIG7 | 84989  | 85568  | 0.92 | 1.38E-01 | transcription_start_site | + | 87847 | 87847 | -2568 | 1294 | AN0409 |
| 2037 | CONTIG7 | 84989  | 85568  | 0.92 | 1.38E-01 | transcription_start_site | + | 87969 | 87969 | -2690 | 1295 | AN0409 |
| 2032 | CONTIG7 | 86704  | 87670  | 0.92 | 6.93E-02 | transcription_start_site | + | 92593 | 92593 | -5406 | 1296 | AN0410 |
| 2100 | CONTIG7 | 91371  | 91790  | 0.88 | 1.54E-01 | transcription_start_site | + | 92593 | 92593 | -1012 | 1296 | AN0410 |
| 2100 | CONTIG7 | 91371  | 91790  | 0.88 | 1.54E-01 | transcription_start_site | + | 92844 | 92844 | -1263 | 1297 | AN0410 |
| 2100 | CONTIG7 | 91371  | 91790  | 0.88 | 1.54E-01 | transcription_start_site | + | 93409 | 93409 | -1828 | 1298 | AN0410 |
| 2100 | CONTIG7 | 91371  | 91790  | 0.88 | 1.54E-01 | transcription_start_site | + | 93788 | 93788 | -2207 | 1299 | AN0410 |
| 301  | CONTIG7 | 101404 | 101903 | 2.62 | 0.00E+00 | transcription_start_site | - | 97915 | 97915 | -3738 | 1300 | AN0411 |
| 301  | CONTIG7 | 101404 | 101903 | 2.62 | 0.00E+00 | transcription_start_site | - | 97729 | 97729 | -3924 | 1301 | AN0411 |
| 301  | CONTIG7 | 101404 | 101903 | 2.62 | 0.00E+00 | transcription_start_site | - | 97509 | 97509 | -4144 | 1302 | AN0411 |

|      |         |        |        |      |          |                          |   |        |        |       |      |        |
|------|---------|--------|--------|------|----------|--------------------------|---|--------|--------|-------|------|--------|
| 301  | CONTIG7 | 101404 | 101903 | 2.62 | 0.00E+00 | transcription_start_site | - | 97381  | 97381  | -4272 | 1303 | AN0411 |
| 301  | CONTIG7 | 101404 | 101903 | 2.62 | 0.00E+00 | transcription_start_site | - | 97245  | 97245  | -4408 | 1304 | AN0411 |
| 301  | CONTIG7 | 101404 | 101903 | 2.62 | 0.00E+00 | transcription_start_site | - | 96870  | 96870  | -4783 | 1305 | AN0411 |
| 522  | CONTIG7 | 101939 | 103118 | 2.28 | 0.00E+00 | transcription_start_site | - | 97915  | 97915  | -4613 | 1300 | AN0411 |
| 522  | CONTIG7 | 101939 | 103118 | 2.28 | 0.00E+00 | transcription_start_site | - | 97729  | 97729  | -4799 | 1301 | AN0411 |
| 522  | CONTIG7 | 101939 | 103118 | 2.28 | 0.00E+00 | transcription_start_site | - | 97509  | 97509  | -5019 | 1302 | AN0411 |
| 522  | CONTIG7 | 101939 | 103118 | 2.28 | 0.00E+00 | transcription_start_site | - | 97381  | 97381  | -5147 | 1303 | AN0411 |
| 522  | CONTIG7 | 101939 | 103118 | 2.28 | 0.00E+00 | transcription_start_site | - | 97245  | 97245  | -5283 | 1304 | AN0411 |
| 301  | CONTIG7 | 101404 | 101903 | 2.62 | 0.00E+00 | transcription_start_site | - | 100781 | 100781 | -872  | 1306 | AN0412 |
| 522  | CONTIG7 | 101939 | 103118 | 2.28 | 0.00E+00 | transcription_start_site | - | 100781 | 100781 | -1747 | 1306 | AN0412 |
| 858  | CONTIG7 | 104569 | 105053 | 1.87 | 1.41E-03 | transcription_start_site | - | 100781 | 100781 | -4030 | 1306 | AN0412 |
| 858  | CONTIG7 | 104569 | 105053 | 1.87 | 1.41E-03 | transcription_start_site | - | 104920 | 104920 | 109   | 1312 | AN0413 |
| 858  | CONTIG7 | 104569 | 105053 | 1.87 | 1.41E-03 | transcription_start_site | - | 105185 | 105185 | 374   | 1311 | AN0413 |
| 858  | CONTIG7 | 104569 | 105053 | 1.87 | 1.41E-03 | transcription_start_site | - | 105447 | 105447 | 636   | 1310 | AN0413 |
| 858  | CONTIG7 | 104569 | 105053 | 1.87 | 1.41E-03 | transcription_start_site | - | 105736 | 105736 | 925   | 1309 | AN0413 |
| 858  | CONTIG7 | 104569 | 105053 | 1.87 | 1.41E-03 | transcription_start_site | - | 105950 | 105950 | 1139  | 1308 | AN0413 |
| 393  | CONTIG7 | 120846 | 121180 | 2.45 | 0.00E+00 | transcription_start_site | + | 121813 | 121813 | -800  | 1315 | AN0416 |
| 393  | CONTIG7 | 120846 | 121180 | 2.45 | 0.00E+00 | transcription_start_site | + | 121951 | 121951 | -938  | 1316 | AN0416 |
| 393  | CONTIG7 | 120846 | 121180 | 2.45 | 0.00E+00 | transcription_start_site | + | 122445 | 122445 | -1432 | 1317 | AN0416 |
| 393  | CONTIG7 | 120846 | 121180 | 2.45 | 0.00E+00 | transcription_start_site | + | 122688 | 122688 | -1675 | 1318 | AN0416 |
| 393  | CONTIG7 | 120846 | 121180 | 2.45 | 0.00E+00 | transcription_start_site | + | 123691 | 123691 | -2678 | 1319 | AN0417 |
| 393  | CONTIG7 | 120846 | 121180 | 2.45 | 0.00E+00 | transcription_start_site | + | 123808 | 123808 | -2795 | 1320 | AN0417 |
| 393  | CONTIG7 | 120846 | 121180 | 2.45 | 0.00E+00 | transcription_start_site | + | 124219 | 124219 | -3206 | 1321 | AN0417 |
| 1885 | CONTIG7 | 160140 | 160414 | 1.02 | 9.60E-02 | transcription_start_site | - | 156041 | 156041 | -4236 | 1353 | AN0428 |
| 1885 | CONTIG7 | 160140 | 160414 | 1.02 | 9.60E-02 | transcription_start_site | - | 155697 | 155697 | -4580 | 1354 | AN0428 |
| 1885 | CONTIG7 | 160140 | 160414 | 1.02 | 9.60E-02 | transcription_start_site | - | 155620 | 155620 | -4657 | 1355 | AN0428 |
| 1885 | CONTIG7 | 160140 | 160414 | 1.02 | 9.60E-02 | transcription_start_site | - | 155491 | 155491 | -4786 | 1356 | AN0428 |
| 1885 | CONTIG7 | 160140 | 160414 | 1.02 | 9.60E-02 | transcription_start_site | - | 159831 | 159831 | -446  | 1360 | AN0430 |
| 1926 | CONTIG7 | 171835 | 172184 | 0.99 | 1.08E-01 | transcription_start_site | - | 169177 | 169177 | -2832 | 1361 | AN0432 |
| 1926 | CONTIG7 | 171835 | 172184 | 0.99 | 1.08E-01 | transcription_start_site | - | 169054 | 169054 | -2955 | 1362 | AN0432 |
| 1926 | CONTIG7 | 171835 | 172184 | 0.99 | 1.08E-01 | transcription_start_site | - | 168723 | 168723 | -3286 | 1363 | AN0432 |
| 1926 | CONTIG7 | 171835 | 172184 | 0.99 | 1.08E-01 | transcription_start_site | - | 168585 | 168585 | -3424 | 1364 | AN0432 |
| 1926 | CONTIG7 | 171835 | 172184 | 0.99 | 1.08E-01 | transcription_start_site | - | 171236 | 171236 | -773  | 1365 | AN0433 |
| 1926 | CONTIG7 | 171835 | 172184 | 0.99 | 1.08E-01 | transcription_start_site | - | 171071 | 171071 | -938  | 1366 | AN0433 |
| 1926 | CONTIG7 | 171835 | 172184 | 0.99 | 1.08E-01 | transcription_start_site | - | 170835 | 170835 | -1174 | 1367 | AN0433 |
| 1388 | CONTIG7 | 166437 | 167380 | 1.36 | 3.01E-02 | transcription_start_site | + | 172118 | 172118 | -5209 | 1368 | AN0434 |
| 1926 | CONTIG7 | 171835 | 172184 | 0.99 | 1.08E-01 | transcription_start_site | + | 172118 | 172118 | -108  | 1368 | AN0434 |
| 1926 | CONTIG7 | 171835 | 172184 | 0.99 | 1.08E-01 | transcription_start_site | + | 172733 | 172733 | -723  | 1369 | AN0434 |
| 1926 | CONTIG7 | 171835 | 172184 | 0.99 | 1.08E-01 | transcription_start_site | + | 172863 | 172863 | -853  | 1370 | AN0434 |
| 1926 | CONTIG7 | 171835 | 172184 | 0.99 | 1.08E-01 | transcription_start_site | + | 173066 | 173066 | -1056 | 1371 | AN0434 |
| 1926 | CONTIG7 | 171835 | 172184 | 0.99 | 1.08E-01 | transcription_start_site | + | 173179 | 173179 | -1169 | 1372 | AN0434 |
| 1926 | CONTIG7 | 171835 | 172184 | 0.99 | 1.08E-01 | transcription_start_site | + | 173654 | 173654 | -1644 | 1373 | AN0434 |
| 555  | CONTIG7 | 209867 | 210438 | 2.24 | 0.00E+00 | transcription_start_site | - | 206763 | 206763 | -3389 | 1424 | AN0446 |
| 772  | CONTIG7 | 208817 | 209166 | 1.97 | 2.61E-03 | transcription_start_site | - | 206763 | 206763 | -2228 | 1424 | AN0446 |
| 772  | CONTIG7 | 208817 | 209166 | 1.97 | 2.61E-03 | transcription_start_site | - | 204624 | 204624 | -4367 | 1425 | AN0446 |
| 555  | CONTIG7 | 209867 | 210438 | 2.24 | 0.00E+00 | transcription_start_site | + | 214579 | 214579 | -4426 | 1429 | AN0448 |
| 555  | CONTIG7 | 209867 | 210438 | 2.24 | 0.00E+00 | transcription_start_site | + | 214698 | 214698 | -4545 | 1430 | AN0448 |
| 1107 | CONTIG7 | 229596 | 230460 | 1.6  | 4.92E-03 | transcription_start_site | + | 230649 | 230649 | -621  | 1445 | AN0454 |
| 2038 | CONTIG7 | 254706 | 255126 | 0.92 | 1.38E-01 | transcription_start_site | + | 255731 | 255731 | -815  | 1462 | AN0463 |
| 865  | CONTIG7 | 268660 | 268929 | 1.87 | 4.57E-03 | transcription_start_site | - | 263810 | 263810 | -4984 | 1463 | AN0464 |
| 1477 | CONTIG7 | 265365 | 265646 | 1.29 | 3.70E-02 | transcription_start_site | - | 263810 | 263810 | -1695 | 1463 | AN0464 |
| 1477 | CONTIG7 | 265365 | 265646 | 1.29 | 3.70E-02 | transcription_start_site | - | 263155 | 263155 | -2350 | 1464 | AN0464 |
| 1477 | CONTIG7 | 265365 | 265646 | 1.29 | 3.70E-02 | transcription_start_site | - | 262576 | 262576 | -2929 | 1465 | AN0464 |
| 2137 | CONTIG7 | 264540 | 265040 | 0.85 | 1.76E-01 | transcription_start_site | - | 263810 | 263810 | -980  | 1463 | AN0464 |
| 2137 | CONTIG7 | 264540 | 265040 | 0.85 | 1.76E-01 | transcription_start_site | - | 263155 | 263155 | -1635 | 1464 | AN0464 |
| 2137 | CONTIG7 | 264540 | 265040 | 0.85 | 1.76E-01 | transcription_start_site | - | 262576 | 262576 | -2214 | 1465 | AN0464 |
| 865  | CONTIG7 | 268660 | 268929 | 1.87 | 4.57E-03 | transcription_start_site | - | 264836 | 264836 | -3958 | 1466 | AN0465 |

|      |         |        |        |      |          |                          |   |        |        |       |      |        |
|------|---------|--------|--------|------|----------|--------------------------|---|--------|--------|-------|------|--------|
| 865  | CONTIG7 | 268660 | 268929 | 1.87 | 4.57E-03 | transcription_start_site | - | 264704 | 264704 | -4090 | 1467 | ANO465 |
| 1477 | CONTIG7 | 265365 | 265646 | 1.29 | 3.70E-02 | transcription_start_site | - | 264836 | 264836 | -669  | 1466 | ANO465 |
| 1477 | CONTIG7 | 265365 | 265646 | 1.29 | 3.70E-02 | transcription_start_site | - | 264704 | 264704 | -801  | 1467 | ANO465 |
| 2137 | CONTIG7 | 264540 | 265040 | 0.85 | 1.76E-01 | transcription_start_site | - | 264836 | 264836 | 46    | 1466 | ANO465 |
| 2137 | CONTIG7 | 264540 | 265040 | 0.85 | 1.76E-01 | transcription_start_site | - | 264704 | 264704 | -86   | 1467 | ANO465 |
| 865  | CONTIG7 | 268660 | 268929 | 1.87 | 4.57E-03 | transcription_start_site | - | 266867 | 266867 | -1927 | 1468 | ANO466 |
| 865  | CONTIG7 | 268660 | 268929 | 1.87 | 4.57E-03 | transcription_start_site | - | 268067 | 268067 | -727  | 1469 | ANO467 |
| 865  | CONTIG7 | 268660 | 268929 | 1.87 | 4.57E-03 | transcription_start_site | - | 267401 | 267401 | -1393 | 1470 | ANO467 |
| 865  | CONTIG7 | 268660 | 268929 | 1.87 | 4.57E-03 | transcription_start_site | + | 269264 | 269264 | -469  | 1471 | ANO468 |
| 865  | CONTIG7 | 268660 | 268929 | 1.87 | 4.57E-03 | transcription_start_site | + | 269857 | 269857 | -1062 | 1472 | ANO468 |
| 1477 | CONTIG7 | 265365 | 265646 | 1.29 | 3.70E-02 | transcription_start_site | + | 269264 | 269264 | -3758 | 1471 | ANO468 |
| 1477 | CONTIG7 | 265365 | 265646 | 1.29 | 3.70E-02 | transcription_start_site | + | 269857 | 269857 | -4351 | 1472 | ANO468 |
| 2137 | CONTIG7 | 264540 | 265040 | 0.85 | 1.76E-01 | transcription_start_site | + | 269264 | 269264 | -4474 | 1471 | ANO468 |
| 2137 | CONTIG7 | 264540 | 265040 | 0.85 | 1.76E-01 | transcription_start_site | + | 269857 | 269857 | -5067 | 1472 | ANO468 |
| 1836 | CONTIG7 | 279456 | 279737 | 1.05 | 8.63E-02 | transcription_start_site | - | 274556 | 274556 | -5040 | 1473 | ANO469 |
| 171  | CONTIG7 | 281941 | 282285 | 2.89 | 0.00E+00 | transcription_start_site | - | 279452 | 279452 | -2661 | 1481 | ANO470 |
| 171  | CONTIG7 | 281941 | 282285 | 2.89 | 0.00E+00 | transcription_start_site | - | 279063 | 279063 | -3050 | 1482 | ANO470 |
| 171  | CONTIG7 | 281941 | 282285 | 2.89 | 0.00E+00 | transcription_start_site | - | 278615 | 278615 | -3498 | 1483 | ANO470 |
| 1836 | CONTIG7 | 279456 | 279737 | 1.05 | 8.63E-02 | transcription_start_site | - | 279452 | 279452 | -144  | 1481 | ANO470 |
| 1836 | CONTIG7 | 279456 | 279737 | 1.05 | 8.63E-02 | transcription_start_site | - | 279063 | 279063 | -533  | 1482 | ANO470 |
| 1836 | CONTIG7 | 279456 | 279737 | 1.05 | 8.63E-02 | transcription_start_site | - | 278615 | 278615 | -981  | 1483 | ANO470 |
| 171  | CONTIG7 | 281941 | 282285 | 2.89 | 0.00E+00 | transcription_start_site | - | 281421 | 281421 | -692  | 1484 | ANO471 |
| 171  | CONTIG7 | 281941 | 282285 | 2.89 | 0.00E+00 | transcription_start_site | - | 280981 | 280981 | -1132 | 1485 | ANO471 |
| 171  | CONTIG7 | 281941 | 282285 | 2.89 | 0.00E+00 | transcription_start_site | - | 280085 | 280085 | -2028 | 1486 | ANO471 |
| 1836 | CONTIG7 | 279456 | 279737 | 1.05 | 8.63E-02 | transcription_start_site | - | 280085 | 280085 | 488   | 1486 | ANO471 |
| 171  | CONTIG7 | 281941 | 282285 | 2.89 | 0.00E+00 | transcription_start_site | - | 282961 | 282961 | 848   | 1493 | ANO472 |
| 171  | CONTIG7 | 281941 | 282285 | 2.89 | 0.00E+00 | transcription_start_site | - | 283269 | 283269 | 1156  | 1492 | ANO472 |
| 2039 | CONTIG7 | 287711 | 288126 | 0.92 | 1.38E-01 | transcription_start_site | - | 285950 | 285950 | -1968 | 1487 | ANO472 |
| 2039 | CONTIG7 | 287711 | 288126 | 0.92 | 1.38E-01 | transcription_start_site | - | 285737 | 285737 | -2181 | 1488 | ANO472 |
| 2039 | CONTIG7 | 287711 | 288126 | 0.92 | 1.38E-01 | transcription_start_site | - | 285313 | 285313 | -2605 | 1489 | ANO472 |
| 2039 | CONTIG7 | 287711 | 288126 | 0.92 | 1.38E-01 | transcription_start_site | - | 285160 | 285160 | -2758 | 1490 | ANO472 |
| 2039 | CONTIG7 | 287711 | 288126 | 0.92 | 1.38E-01 | transcription_start_site | - | 283384 | 283384 | -4534 | 1491 | ANO472 |
| 2039 | CONTIG7 | 287711 | 288126 | 0.92 | 1.38E-01 | transcription_start_site | - | 283269 | 283269 | -4649 | 1492 | ANO472 |
| 2039 | CONTIG7 | 287711 | 288126 | 0.92 | 1.38E-01 | transcription_start_site | - | 282961 | 282961 | -4957 | 1493 | ANO472 |
| 2039 | CONTIG7 | 287711 | 288126 | 0.92 | 1.38E-01 | transcription_start_site | + | 288386 | 288386 | -467  | 1494 | ANO473 |
| 2039 | CONTIG7 | 287711 | 288126 | 0.92 | 1.38E-01 | transcription_start_site | + | 289096 | 289096 | -1177 | 1495 | ANO473 |
| 2039 | CONTIG7 | 287711 | 288126 | 0.92 | 1.38E-01 | transcription_start_site | + | 289410 | 289410 | -1491 | 1496 | ANO473 |
| 2039 | CONTIG7 | 287711 | 288126 | 0.92 | 1.38E-01 | transcription_start_site | + | 289590 | 289590 | -1671 | 1497 | ANO473 |
| 2039 | CONTIG7 | 287711 | 288126 | 0.92 | 1.38E-01 | transcription_start_site | + | 289762 | 289762 | -1843 | 1498 | ANO473 |
| 2039 | CONTIG7 | 287711 | 288126 | 0.92 | 1.38E-01 | transcription_start_site | + | 290681 | 290681 | -2762 | 1499 | ANO474 |
| 2039 | CONTIG7 | 287711 | 288126 | 0.92 | 1.38E-01 | transcription_start_site | + | 291206 | 291206 | -3287 | 1500 | ANO474 |
| 2039 | CONTIG7 | 287711 | 288126 | 0.92 | 1.38E-01 | transcription_start_site | + | 291364 | 291364 | -3445 | 1501 | ANO474 |
| 2039 | CONTIG7 | 287711 | 288126 | 0.92 | 1.38E-01 | transcription_start_site | + | 291637 | 291637 | -3718 | 1502 | ANO474 |
| 800  | CONTIG7 | 321617 | 321886 | 1.94 | 3.37E-03 | transcription_start_site | - | 317332 | 317332 | -4419 | 1530 | ANO482 |
| 800  | CONTIG7 | 321617 | 321886 | 1.94 | 3.37E-03 | transcription_start_site | - | 317253 | 317253 | -4498 | 1531 | ANO482 |
| 800  | CONTIG7 | 321617 | 321886 | 1.94 | 3.37E-03 | transcription_start_site | - | 317119 | 317119 | -4632 | 1532 | ANO482 |
| 2031 | CONTIG7 | 319292 | 321351 | 0.92 | 1.75E-02 | transcription_start_site | - | 317332 | 317332 | -2989 | 1530 | ANO482 |
| 2031 | CONTIG7 | 319292 | 321351 | 0.92 | 1.75E-02 | transcription_start_site | - | 317253 | 317253 | -3068 | 1531 | ANO482 |
| 2031 | CONTIG7 | 319292 | 321351 | 0.92 | 1.75E-02 | transcription_start_site | - | 317119 | 317119 | -3202 | 1532 | ANO482 |
| 580  | CONTIG7 | 324232 | 324736 | 2.21 | 8.35E-04 | transcription_start_site | - | 319919 | 319919 | -4565 | 1533 | ANO483 |
| 580  | CONTIG7 | 324232 | 324736 | 2.21 | 8.35E-04 | transcription_start_site | - | 319552 | 319552 | -4932 | 1534 | ANO483 |
| 800  | CONTIG7 | 321617 | 321886 | 1.94 | 3.37E-03 | transcription_start_site | - | 319919 | 319919 | -1832 | 1533 | ANO483 |
| 800  | CONTIG7 | 321617 | 321886 | 1.94 | 3.37E-03 | transcription_start_site | - | 319552 | 319552 | -2199 | 1534 | ANO483 |
| 2031 | CONTIG7 | 319292 | 321351 | 0.92 | 1.75E-02 | transcription_start_site | - | 319919 | 319919 | -402  | 1533 | ANO483 |
| 2031 | CONTIG7 | 319292 | 321351 | 0.92 | 1.75E-02 | transcription_start_site | - | 319552 | 319552 | -769  | 1534 | ANO483 |
| 2101 | CONTIG7 | 323112 | 323531 | 0.88 | 1.54E-01 | transcription_start_site | - | 319919 | 319919 | -3402 | 1533 | ANO483 |
| 2101 | CONTIG7 | 323112 | 323531 | 0.88 | 1.54E-01 | transcription_start_site | - | 319552 | 319552 | -3769 | 1534 | ANO483 |

|      |         |        |        |      |          |                          |   |        |        |       |      |        |
|------|---------|--------|--------|------|----------|--------------------------|---|--------|--------|-------|------|--------|
| 580  | CONTIG7 | 324232 | 324736 | 2.21 | 8.35E-04 | transcription_start_site | - | 321486 | 321486 | -2998 | 1535 | AN0484 |
| 580  | CONTIG7 | 324232 | 324736 | 2.21 | 8.35E-04 | transcription_start_site | - | 321383 | 321383 | -3101 | 1536 | AN0484 |
| 800  | CONTIG7 | 321617 | 321886 | 1.94 | 3.37E-03 | transcription_start_site | - | 321486 | 321486 | -265  | 1535 | AN0484 |
| 800  | CONTIG7 | 321617 | 321886 | 1.94 | 3.37E-03 | transcription_start_site | - | 321383 | 321383 | -368  | 1536 | AN0484 |
| 2031 | CONTIG7 | 319292 | 321351 | 0.92 | 1.75E-02 | transcription_start_site | - | 321383 | 321383 | 1061  | 1536 | AN0484 |
| 2031 | CONTIG7 | 319292 | 321351 | 0.92 | 1.75E-02 | transcription_start_site | - | 321486 | 321486 | 1164  | 1535 | AN0484 |
| 2101 | CONTIG7 | 323112 | 323531 | 0.88 | 1.54E-01 | transcription_start_site | - | 321486 | 321486 | -1835 | 1535 | AN0484 |
| 2101 | CONTIG7 | 323112 | 323531 | 0.88 | 1.54E-01 | transcription_start_site | - | 321383 | 321383 | -1938 | 1536 | AN0484 |
| 580  | CONTIG7 | 324232 | 324736 | 2.21 | 8.35E-04 | transcription_start_site | - | 323981 | 323981 | -503  | 1537 | AN0485 |
| 580  | CONTIG7 | 324232 | 324736 | 2.21 | 8.35E-04 | transcription_start_site | - | 323186 | 323186 | -1298 | 1538 | AN0485 |
| 580  | CONTIG7 | 324232 | 324736 | 2.21 | 8.35E-04 | transcription_start_site | - | 323096 | 323096 | -1388 | 1539 | AN0485 |
| 580  | CONTIG7 | 324232 | 324736 | 2.21 | 8.35E-04 | transcription_start_site | - | 322947 | 322947 | -1537 | 1540 | AN0485 |
| 2101 | CONTIG7 | 323112 | 323531 | 0.88 | 1.54E-01 | transcription_start_site | - | 323186 | 323186 | -135  | 1538 | AN0485 |
| 2101 | CONTIG7 | 323112 | 323531 | 0.88 | 1.54E-01 | transcription_start_site | - | 323096 | 323096 | -225  | 1539 | AN0485 |
| 2101 | CONTIG7 | 323112 | 323531 | 0.88 | 1.54E-01 | transcription_start_site | - | 322947 | 322947 | -374  | 1540 | AN0485 |
| 2101 | CONTIG7 | 323112 | 323531 | 0.88 | 1.54E-01 | transcription_start_site | - | 323981 | 323981 | 659   | 1537 | AN0485 |
| 580  | CONTIG7 | 324232 | 324736 | 2.21 | 8.35E-04 | transcription_start_site | + | 324896 | 324896 | -412  | 1541 | AN0486 |
| 580  | CONTIG7 | 324232 | 324736 | 2.21 | 8.35E-04 | transcription_start_site | + | 325153 | 325153 | -669  | 1542 | AN0486 |
| 580  | CONTIG7 | 324232 | 324736 | 2.21 | 8.35E-04 | transcription_start_site | + | 325465 | 325465 | -981  | 1543 | AN0486 |
| 580  | CONTIG7 | 324232 | 324736 | 2.21 | 8.35E-04 | transcription_start_site | + | 327062 | 327062 | -2578 | 1544 | AN0486 |
| 800  | CONTIG7 | 321617 | 321886 | 1.94 | 3.37E-03 | transcription_start_site | + | 324896 | 324896 | -3144 | 1541 | AN0486 |
| 800  | CONTIG7 | 321617 | 321886 | 1.94 | 3.37E-03 | transcription_start_site | + | 325153 | 325153 | -3401 | 1542 | AN0486 |
| 800  | CONTIG7 | 321617 | 321886 | 1.94 | 3.37E-03 | transcription_start_site | + | 325465 | 325465 | -3713 | 1543 | AN0486 |
| 2031 | CONTIG7 | 319292 | 321351 | 0.92 | 1.75E-02 | transcription_start_site | + | 324896 | 324896 | -4574 | 1541 | AN0486 |
| 2031 | CONTIG7 | 319292 | 321351 | 0.92 | 1.75E-02 | transcription_start_site | + | 325153 | 325153 | -4831 | 1542 | AN0486 |
| 2031 | CONTIG7 | 319292 | 321351 | 0.92 | 1.75E-02 | transcription_start_site | + | 325465 | 325465 | -5143 | 1543 | AN0486 |
| 2101 | CONTIG7 | 323112 | 323531 | 0.88 | 1.54E-01 | transcription_start_site | + | 324896 | 324896 | -1574 | 1541 | AN0486 |
| 2101 | CONTIG7 | 323112 | 323531 | 0.88 | 1.54E-01 | transcription_start_site | + | 325153 | 325153 | -1831 | 1542 | AN0486 |
| 2101 | CONTIG7 | 323112 | 323531 | 0.88 | 1.54E-01 | transcription_start_site | + | 325465 | 325465 | -2143 | 1543 | AN0486 |
| 2101 | CONTIG7 | 323112 | 323531 | 0.88 | 1.54E-01 | transcription_start_site | + | 327062 | 327062 | -3740 | 1544 | AN0486 |
| 580  | CONTIG7 | 324232 | 324736 | 2.21 | 8.35E-04 | transcription_start_site | + | 328327 | 328327 | -3843 | 1545 | AN0487 |
| 580  | CONTIG7 | 324232 | 324736 | 2.21 | 8.35E-04 | transcription_start_site | + | 328430 | 328430 | -3946 | 1546 | AN0487 |
| 580  | CONTIG7 | 324232 | 324736 | 2.21 | 8.35E-04 | transcription_start_site | + | 329181 | 329181 | -4697 | 1547 | AN0487 |
| 580  | CONTIG7 | 324232 | 324736 | 2.21 | 8.35E-04 | transcription_start_site | + | 329385 | 329385 | -4901 | 1548 | AN0487 |
| 2101 | CONTIG7 | 323112 | 323531 | 0.88 | 1.54E-01 | transcription_start_site | + | 328327 | 328327 | -5005 | 1545 | AN0487 |
| 2101 | CONTIG7 | 323112 | 323531 | 0.88 | 1.54E-01 | transcription_start_site | + | 328430 | 328430 | -5108 | 1546 | AN0487 |
| 629  | CONTIG7 | 351607 | 351876 | 2.14 | 1.09E-03 | transcription_start_site | + | 352429 | 352429 | -687  | 1568 | AN0493 |
| 1165 | CONTIG7 | 357687 | 357966 | 1.56 | 1.37E-02 | transcription_start_site | - | 357154 | 357154 | -672  | 1569 | AN0494 |
| 1165 | CONTIG7 | 357687 | 357966 | 1.56 | 1.37E-02 | transcription_start_site | + | 358065 | 358065 | -238  | 1570 | AN0495 |
| 1987 | CONTIG7 | 410701 | 410992 | 0.95 | 1.22E-01 | transcription_start_site | - | 407844 | 407844 | -3002 | 1610 | AN0510 |
| 1987 | CONTIG7 | 410701 | 410992 | 0.95 | 1.22E-01 | transcription_start_site | + | 413099 | 413099 | -2252 | 1613 | AN0512 |
| 1987 | CONTIG7 | 410701 | 410992 | 0.95 | 1.22E-01 | transcription_start_site | + | 413518 | 413518 | -2671 | 1614 | AN0512 |
| 1987 | CONTIG7 | 410701 | 410992 | 0.95 | 1.22E-01 | transcription_start_site | + | 413883 | 413883 | -3036 | 1615 | AN0512 |
| 1987 | CONTIG7 | 410701 | 410992 | 0.95 | 1.22E-01 | transcription_start_site | + | 414647 | 414647 | -3800 | 1616 | AN0512 |
| 1987 | CONTIG7 | 410701 | 410992 | 0.95 | 1.22E-01 | transcription_start_site | + | 414819 | 414819 | -3972 | 1617 | AN0512 |
| 2331 | CONTIG7 | 475144 | 475344 | 0.61 | 6.58E-02 | transcription_start_site | - | 472830 | 472830 | -2414 | 1674 | AN0533 |
| 2331 | CONTIG7 | 475144 | 475344 | 0.61 | 6.58E-02 | transcription_start_site | - | 472526 | 472526 | -2718 | 1675 | AN0533 |
| 2331 | CONTIG7 | 475144 | 475344 | 0.61 | 6.58E-02 | transcription_start_site | - | 471982 | 471982 | -3262 | 1676 | AN0533 |
| 2331 | CONTIG7 | 475144 | 475344 | 0.61 | 6.58E-02 | transcription_start_site | - | 471410 | 471410 | -3834 | 1677 | AN0533 |
| 2331 | CONTIG7 | 475144 | 475344 | 0.61 | 6.58E-02 | transcription_start_site | - | 470883 | 470883 | -4361 | 1678 | AN0533 |
| 2331 | CONTIG7 | 475144 | 475344 | 0.61 | 6.58E-02 | transcription_start_site | - | 474618 | 474618 | -626  | 1679 | AN0534 |
| 2331 | CONTIG7 | 475144 | 475344 | 0.61 | 6.58E-02 | transcription_start_site | - | 474466 | 474466 | -778  | 1680 | AN0534 |
| 2331 | CONTIG7 | 475144 | 475344 | 0.61 | 6.58E-02 | transcription_start_site | - | 474155 | 474155 | -1089 | 1681 | AN0534 |
| 2331 | CONTIG7 | 475144 | 475344 | 0.61 | 6.58E-02 | transcription_start_site | - | 474006 | 474006 | -1238 | 1682 | AN0534 |
| 2331 | CONTIG7 | 475144 | 475344 | 0.61 | 6.58E-02 | transcription_start_site | + | 476198 | 476198 | -954  | 1683 | AN0535 |
| 2331 | CONTIG7 | 475144 | 475344 | 0.61 | 6.58E-02 | transcription_start_site | + | 476752 | 476752 | -1508 | 1684 | AN0535 |
| 2331 | CONTIG7 | 475144 | 475344 | 0.61 | 6.58E-02 | transcription_start_site | + | 477853 | 477853 | -2609 | 1685 | AN0536 |

|      |         |        |        |      |          |                          |   |        |        |       |      |        |
|------|---------|--------|--------|------|----------|--------------------------|---|--------|--------|-------|------|--------|
| 2331 | CONTIG7 | 475144 | 475344 | 0.61 | 6.58E-02 | transcription_start_site | + | 478057 | 478057 | -2813 | 1686 | AN0536 |
| 2331 | CONTIG7 | 475144 | 475344 | 0.61 | 6.58E-02 | transcription_start_site | + | 479749 | 479749 | -4505 | 1687 | AN0537 |
| 2331 | CONTIG7 | 475144 | 475344 | 0.61 | 6.58E-02 | transcription_start_site | + | 480001 | 480001 | -4757 | 1688 | AN0537 |
| 1191 | CONTIG7 | 508741 | 509232 | 1.53 | 1.54E-02 | transcription_start_site | - | 507869 | 507869 | -1117 | 1713 | AN0544 |
| 1191 | CONTIG7 | 508741 | 509232 | 1.53 | 1.54E-02 | transcription_start_site | - | 507680 | 507680 | -1306 | 1714 | AN0544 |
| 1191 | CONTIG7 | 508741 | 509232 | 1.53 | 1.54E-02 | transcription_start_site | - | 507580 | 507580 | -1406 | 1715 | AN0544 |
| 1191 | CONTIG7 | 508741 | 509232 | 1.53 | 1.54E-02 | transcription_start_site | - | 507418 | 507418 | -1568 | 1716 | AN0544 |
| 1191 | CONTIG7 | 508741 | 509232 | 1.53 | 1.54E-02 | transcription_start_site | + | 510718 | 510718 | -1731 | 1717 | AN0545 |
| 1191 | CONTIG7 | 508741 | 509232 | 1.53 | 1.54E-02 | transcription_start_site | + | 510788 | 510788 | -1801 | 1718 | AN0545 |
| 1191 | CONTIG7 | 508741 | 509232 | 1.53 | 1.54E-02 | transcription_start_site | + | 511100 | 511100 | -2113 | 1719 | AN0545 |
| 1191 | CONTIG7 | 508741 | 509232 | 1.53 | 1.54E-02 | transcription_start_site | + | 511277 | 511277 | -2290 | 1720 | AN0545 |
| 523  | CONTIG7 | 547506 | 547860 | 2.28 | 2.06E-04 | transcription_start_site | - | 547187 | 547187 | -496  | 1755 | AN0554 |
| 523  | CONTIG7 | 547506 | 547860 | 2.28 | 2.06E-04 | transcription_start_site | - | 547060 | 547060 | -623  | 1756 | AN0554 |
| 523  | CONTIG7 | 547506 | 547860 | 2.28 | 2.06E-04 | transcription_start_site | - | 545804 | 545804 | -1879 | 1757 | AN0554 |
| 2214 | CONTIG7 | 561991 | 562565 | 0.78 | 1.57E-01 | transcription_start_site | - | 561049 | 561049 | -1229 | 1764 | AN0558 |
| 2214 | CONTIG7 | 561991 | 562565 | 0.78 | 1.57E-01 | transcription_start_site | - | 560979 | 560979 | -1299 | 1765 | AN0558 |
| 2214 | CONTIG7 | 561991 | 562565 | 0.78 | 1.57E-01 | transcription_start_site | - | 560752 | 560752 | -1526 | 1766 | AN0558 |
| 2214 | CONTIG7 | 561991 | 562565 | 0.78 | 1.57E-01 | transcription_start_site | - | 560311 | 560311 | -1967 | 1767 | AN0558 |
| 2214 | CONTIG7 | 561991 | 562565 | 0.78 | 1.57E-01 | transcription_start_site | - | 562383 | 562383 | 105   | 1770 | AN0559 |
| 2214 | CONTIG7 | 561991 | 562565 | 0.78 | 1.57E-01 | transcription_start_site | - | 562688 | 562688 | 410   | 1769 | AN0559 |
| 2214 | CONTIG7 | 561991 | 562565 | 0.78 | 1.57E-01 | transcription_start_site | - | 562812 | 562812 | 534   | 1768 | AN0559 |
| 2214 | CONTIG7 | 561991 | 562565 | 0.78 | 1.57E-01 | transcription_start_site | + | 563137 | 563137 | -859  | 1771 | AN0560 |
| 2214 | CONTIG7 | 561991 | 562565 | 0.78 | 1.57E-01 | transcription_start_site | + | 563599 | 563599 | -1321 | 1772 | AN0560 |
| 2214 | CONTIG7 | 561991 | 562565 | 0.78 | 1.57E-01 | transcription_start_site | + | 565030 | 565030 | -2752 | 1773 | AN0560 |
| 2214 | CONTIG7 | 561991 | 562565 | 0.78 | 1.57E-01 | transcription_start_site | + | 565491 | 565491 | -3213 | 1774 | AN0560 |
| 745  | CONTIG7 | 582846 | 583343 | 2    | 2.32E-03 | transcription_start_site | - | 582210 | 582210 | -884  | 1789 | AN0565 |
| 745  | CONTIG7 | 582846 | 583343 | 2    | 2.32E-03 | transcription_start_site | - | 581439 | 581439 | -1655 | 1790 | AN0565 |
| 745  | CONTIG7 | 582846 | 583343 | 2    | 2.32E-03 | transcription_start_site | + | 583866 | 583866 | -771  | 1791 | AN0566 |
| 745  | CONTIG7 | 582846 | 583343 | 2    | 2.32E-03 | transcription_start_site | + | 584172 | 584172 | -1077 | 1792 | AN0566 |
| 1419 | CONTIG7 | 613513 | 614012 | 1.33 | 1.61E-02 | transcription_start_site | - | 612750 | 612750 | -1012 | 1812 | AN0575 |
| 1419 | CONTIG7 | 613513 | 614012 | 1.33 | 1.61E-02 | transcription_start_site | - | 612319 | 612319 | -1443 | 1813 | AN0575 |
| 1419 | CONTIG7 | 613513 | 614012 | 1.33 | 1.61E-02 | transcription_start_site | - | 611252 | 611252 | -2510 | 1814 | AN0575 |
| 1668 | CONTIG7 | 661893 | 662238 | 1.16 | 6.04E-02 | transcription_start_site | - | 661518 | 661518 | -547  | 1851 | AN0586 |
| 1668 | CONTIG7 | 661893 | 662238 | 1.16 | 6.04E-02 | transcription_start_site | - | 660925 | 660925 | -1140 | 1852 | AN0586 |
| 1668 | CONTIG7 | 661893 | 662238 | 1.16 | 6.04E-02 | transcription_start_site | - | 660813 | 660813 | -1252 | 1853 | AN0586 |
| 1668 | CONTIG7 | 661893 | 662238 | 1.16 | 6.04E-02 | transcription_start_site | - | 660619 | 660619 | -1446 | 1854 | AN0586 |
| 1668 | CONTIG7 | 661893 | 662238 | 1.16 | 6.04E-02 | transcription_start_site | - | 660199 | 660199 | -1866 | 1855 | AN0586 |
| 1668 | CONTIG7 | 661893 | 662238 | 1.16 | 6.04E-02 | transcription_start_site | - | 659738 | 659738 | -2327 | 1856 | AN0586 |
| 1668 | CONTIG7 | 661893 | 662238 | 1.16 | 6.04E-02 | transcription_start_site | + | 665691 | 665691 | -3625 | 1863 | AN0588 |
| 1668 | CONTIG7 | 661893 | 662238 | 1.16 | 6.04E-02 | transcription_start_site | + | 665851 | 665851 | -3785 | 1864 | AN0588 |
| 1668 | CONTIG7 | 661893 | 662238 | 1.16 | 6.04E-02 | transcription_start_site | + | 666498 | 666498 | -4432 | 1865 | AN0588 |
| 1224 | CONTIG7 | 690753 | 691112 | 1.5  | 7.36E-03 | transcription_start_site | - | 688881 | 688881 | -2051 | 1880 | AN0594 |
| 1224 | CONTIG7 | 690753 | 691112 | 1.5  | 7.36E-03 | transcription_start_site | - | 688116 | 688116 | -2816 | 1881 | AN0594 |
| 1224 | CONTIG7 | 690753 | 691112 | 1.5  | 7.36E-03 | transcription_start_site | - | 687829 | 687829 | -3103 | 1882 | AN0594 |
| 1224 | CONTIG7 | 690753 | 691112 | 1.5  | 7.36E-03 | transcription_start_site | + | 691645 | 691645 | -712  | 1884 | AN0595 |
| 1224 | CONTIG7 | 690753 | 691112 | 1.5  | 7.36E-03 | transcription_start_site | + | 693499 | 693499 | -2566 | 1885 | AN0595 |
| 1224 | CONTIG7 | 690753 | 691112 | 1.5  | 7.36E-03 | transcription_start_site | + | 694485 | 694485 | -3552 | 1886 | AN0596 |
| 1224 | CONTIG7 | 690753 | 691112 | 1.5  | 7.36E-03 | transcription_start_site | + | 694659 | 694659 | -3726 | 1887 | AN0596 |
| 1224 | CONTIG7 | 690753 | 691112 | 1.5  | 7.36E-03 | transcription_start_site | + | 695362 | 695362 | -4429 | 1888 | AN0596 |
| 147  | CONTIG7 | 703369 | 703786 | 2.96 | 0.00E+00 | transcription_start_site | - | 699227 | 699227 | -4350 | 1891 | AN0597 |
| 147  | CONTIG7 | 703369 | 703786 | 2.96 | 0.00E+00 | transcription_start_site | + | 702507 | 702507 | 1070  | 1898 | AN0599 |
| 147  | CONTIG7 | 703369 | 703786 | 2.96 | 0.00E+00 | transcription_start_site | + | 703846 | 703846 | -268  | 1899 | AN0600 |
| 147  | CONTIG7 | 703369 | 703786 | 2.96 | 0.00E+00 | transcription_start_site | + | 704343 | 704343 | -765  | 1900 | AN0600 |
| 147  | CONTIG7 | 703369 | 703786 | 2.96 | 0.00E+00 | transcription_start_site | + | 705730 | 705730 | -2152 | 1901 | AN0601 |
| 147  | CONTIG7 | 703369 | 703786 | 2.96 | 0.00E+00 | transcription_start_site | + | 705924 | 705924 | -2346 | 1902 | AN0601 |
| 890  | CONTIG7 | 711687 | 712041 | 1.84 | 5.08E-03 | transcription_start_site | - | 710655 | 710655 | -1209 | 1903 | AN0602 |
| 890  | CONTIG7 | 711687 | 712041 | 1.84 | 5.08E-03 | transcription_start_site | + | 712138 | 712138 | -274  | 1904 | AN0604 |

|      |         |        |        |      |          |                          |   |        |        |       |      |        |
|------|---------|--------|--------|------|----------|--------------------------|---|--------|--------|-------|------|--------|
| 890  | CONTIG7 | 711687 | 712041 | 1.84 | 5.08E-03 | transcription_start_site | + | 712433 | 712433 | -569  | 1905 | AN0604 |
| 890  | CONTIG7 | 711687 | 712041 | 1.84 | 5.08E-03 | transcription_start_site | + | 715029 | 715029 | -3165 | 1906 | AN0605 |
| 890  | CONTIG7 | 711687 | 712041 | 1.84 | 5.08E-03 | transcription_start_site | + | 715102 | 715102 | -3238 | 1907 | AN0605 |
| 890  | CONTIG7 | 711687 | 712041 | 1.84 | 5.08E-03 | transcription_start_site | + | 715429 | 715429 | -3565 | 1908 | AN0605 |
| 110  | CONTIG7 | 736517 | 737168 | 3.06 | 0.00E+00 | transcription_start_site | - | 736405 | 736405 | -437  | 1914 | AN0607 |
| 110  | CONTIG7 | 736517 | 737168 | 3.06 | 0.00E+00 | transcription_start_site | - | 735772 | 735772 | -1070 | 1915 | AN0607 |
| 110  | CONTIG7 | 736517 | 737168 | 3.06 | 0.00E+00 | transcription_start_site | - | 733047 | 733047 | -3795 | 1916 | AN0607 |
| 1304 | CONTIG7 | 738614 | 738954 | 1.43 | 1.06E-02 | transcription_start_site | - | 736405 | 736405 | -2379 | 1914 | AN0607 |
| 1304 | CONTIG7 | 738614 | 738954 | 1.43 | 1.06E-02 | transcription_start_site | - | 735772 | 735772 | -3012 | 1915 | AN0607 |
| 1568 | CONTIG7 | 737869 | 738428 | 1.22 | 4.78E-02 | transcription_start_site | - | 736405 | 736405 | -1743 | 1914 | AN0607 |
| 1568 | CONTIG7 | 737869 | 738428 | 1.22 | 4.78E-02 | transcription_start_site | - | 735772 | 735772 | -2376 | 1915 | AN0607 |
| 1568 | CONTIG7 | 737869 | 738428 | 1.22 | 4.78E-02 | transcription_start_site | - | 733047 | 733047 | -5101 | 1916 | AN0607 |
| 110  | CONTIG7 | 736517 | 737168 | 3.06 | 0.00E+00 | transcription_start_site | + | 737167 | 737167 | -324  | 1917 | AN0608 |
| 110  | CONTIG7 | 736517 | 737168 | 3.06 | 0.00E+00 | transcription_start_site | + | 738185 | 738185 | -1342 | 1918 | AN0608 |
| 1304 | CONTIG7 | 738614 | 738954 | 1.43 | 1.06E-02 | transcription_start_site | + | 738185 | 738185 | 599   | 1918 | AN0608 |
| 1568 | CONTIG7 | 737869 | 738428 | 1.22 | 4.78E-02 | transcription_start_site | + | 738185 | 738185 | -36   | 1918 | AN0608 |
| 1568 | CONTIG7 | 737869 | 738428 | 1.22 | 4.78E-02 | transcription_start_site | + | 737167 | 737167 | 981   | 1917 | AN0608 |
| 1304 | CONTIG7 | 738614 | 738954 | 1.43 | 1.06E-02 | transcription_start_site | - | 739549 | 739549 | 765   | 1923 | AN0609 |
| 1519 | CONTIG7 | 741544 | 741963 | 1.26 | 4.20E-02 | transcription_start_site | - | 741236 | 741236 | -517  | 1919 | AN0609 |
| 1519 | CONTIG7 | 741544 | 741963 | 1.26 | 4.20E-02 | transcription_start_site | - | 740726 | 740726 | -1027 | 1920 | AN0609 |
| 1519 | CONTIG7 | 741544 | 741963 | 1.26 | 4.20E-02 | transcription_start_site | - | 740397 | 740397 | -1356 | 1921 | AN0609 |
| 1519 | CONTIG7 | 741544 | 741963 | 1.26 | 4.20E-02 | transcription_start_site | - | 739963 | 739963 | -1790 | 1922 | AN0609 |
| 1519 | CONTIG7 | 741544 | 741963 | 1.26 | 4.20E-02 | transcription_start_site | - | 739549 | 739549 | -2204 | 1923 | AN0609 |
| 1519 | CONTIG7 | 741544 | 741963 | 1.26 | 4.20E-02 | transcription_start_site | + | 745209 | 745209 | -3455 | 1924 | AN0610 |
| 1519 | CONTIG7 | 741544 | 741963 | 1.26 | 4.20E-02 | transcription_start_site | + | 745344 | 745344 | -3590 | 1925 | AN0610 |
| 1519 | CONTIG7 | 741544 | 741963 | 1.26 | 4.20E-02 | transcription_start_site | + | 745438 | 745438 | -3684 | 1926 | AN0610 |
| 1519 | CONTIG7 | 741544 | 741963 | 1.26 | 4.20E-02 | transcription_start_site | + | 745554 | 745554 | -3800 | 1927 | AN0610 |
| 1519 | CONTIG7 | 741544 | 741963 | 1.26 | 4.20E-02 | transcription_start_site | + | 745715 | 745715 | -3961 | 1928 | AN0610 |
| 1519 | CONTIG7 | 741544 | 741963 | 1.26 | 4.20E-02 | transcription_start_site | + | 746320 | 746320 | -4566 | 1929 | AN0610 |
| 53   | CONTIG8 | 16060  | 16944  | 3.23 | 1.09E-03 | transcription_start_site | - | 12132  | 12132  | -4370 | 1964 | AN0625 |
| 53   | CONTIG8 | 16060  | 16944  | 3.23 | 1.09E-03 | transcription_start_site | - | 11836  | 11836  | -4666 | 1965 | AN0625 |
| 702  | CONTIG8 | 14570  | 15157  | 2.05 | 3.01E-02 | transcription_start_site | - | 12132  | 12132  | -2731 | 1964 | AN0625 |
| 702  | CONTIG8 | 14570  | 15157  | 2.05 | 3.01E-02 | transcription_start_site | - | 11836  | 11836  | -3027 | 1965 | AN0625 |
| 53   | CONTIG8 | 16060  | 16944  | 3.23 | 1.09E-03 | transcription_start_site | - | 14631  | 14631  | -1871 | 1967 | AN0627 |
| 53   | CONTIG8 | 16060  | 16944  | 3.23 | 1.09E-03 | transcription_start_site | - | 14016  | 14016  | -2486 | 1968 | AN0627 |
| 702  | CONTIG8 | 14570  | 15157  | 2.05 | 3.01E-02 | transcription_start_site | - | 14631  | 14631  | -232  | 1967 | AN0627 |
| 702  | CONTIG8 | 14570  | 15157  | 2.05 | 3.01E-02 | transcription_start_site | - | 14016  | 14016  | -847  | 1968 | AN0627 |
| 1562 | CONTIG8 | 18170  | 18519  | 1.23 | 1.97E-01 | transcription_start_site | - | 14631  | 14631  | -3713 | 1967 | AN0627 |
| 1562 | CONTIG8 | 18170  | 18519  | 1.23 | 1.97E-01 | transcription_start_site | - | 14016  | 14016  | -4328 | 1968 | AN0627 |
| 53   | CONTIG8 | 16060  | 16944  | 3.23 | 1.09E-03 | transcription_start_site | + | 19076  | 19076  | -2574 | 1969 | AN0628 |
| 702  | CONTIG8 | 14570  | 15157  | 2.05 | 3.01E-02 | transcription_start_site | + | 19076  | 19076  | -4212 | 1969 | AN0628 |
| 1562 | CONTIG8 | 18170  | 18519  | 1.23 | 1.97E-01 | transcription_start_site | + | 19076  | 19076  | -731  | 1969 | AN0628 |
| 53   | CONTIG8 | 16060  | 16944  | 3.23 | 1.09E-03 | transcription_start_site | + | 21824  | 21824  | -5322 | 1973 | AN0630 |
| 53   | CONTIG8 | 16060  | 16944  | 3.23 | 1.09E-03 | transcription_start_site | + | 21896  | 21896  | -5394 | 1974 | AN0630 |
| 1562 | CONTIG8 | 18170  | 18519  | 1.23 | 1.97E-01 | transcription_start_site | + | 21824  | 21824  | -3479 | 1973 | AN0630 |
| 1562 | CONTIG8 | 18170  | 18519  | 1.23 | 1.97E-01 | transcription_start_site | + | 21896  | 21896  | -3551 | 1974 | AN0630 |
| 1562 | CONTIG8 | 18170  | 18519  | 1.23 | 1.97E-01 | transcription_start_site | + | 22052  | 22052  | -3707 | 1975 | AN0630 |
| 1562 | CONTIG8 | 18170  | 18519  | 1.23 | 1.97E-01 | transcription_start_site | + | 22255  | 22255  | -3910 | 1976 | AN0630 |
| 936  | CONTIG8 | 27153  | 27593  | 1.79 | 2.66E-02 | transcription_start_site | - | 23394  | 23394  | -3979 | 1977 | AN0631 |
| 936  | CONTIG8 | 27153  | 27593  | 1.79 | 2.66E-02 | transcription_start_site | - | 22528  | 22528  | -4845 | 1978 | AN0631 |
| 936  | CONTIG8 | 27153  | 27593  | 1.79 | 2.66E-02 | transcription_start_site | - | 26763  | 26763  | -610  | 1981 | AN0633 |
| 936  | CONTIG8 | 27153  | 27593  | 1.79 | 2.66E-02 | transcription_start_site | - | 26640  | 26640  | -733  | 1982 | AN0633 |
| 1648 | CONTIG8 | 28653  | 29314  | 1.18 | 1.57E-01 | transcription_start_site | - | 26763  | 26763  | -2220 | 1981 | AN0633 |
| 1648 | CONTIG8 | 28653  | 29314  | 1.18 | 1.57E-01 | transcription_start_site | - | 26640  | 26640  | -2343 | 1982 | AN0633 |
| 936  | CONTIG8 | 27153  | 27593  | 1.79 | 2.66E-02 | transcription_start_site | + | 27680  | 27680  | -307  | 1983 | AN0634 |
| 936  | CONTIG8 | 27153  | 27593  | 1.79 | 2.66E-02 | transcription_start_site | + | 27786  | 27786  | -413  | 1984 | AN0634 |
| 1648 | CONTIG8 | 28653  | 29314  | 1.18 | 1.57E-01 | transcription_start_site | + | 27786  | 27786  | 1197  | 1984 | AN0634 |



|      |          |       |       |      |          |                          |   |       |       |       |      |        |
|------|----------|-------|-------|------|----------|--------------------------|---|-------|-------|-------|------|--------|
| 1648 | CONTIG8  | 28653 | 29314 | 1.18 | 1.57E-01 | transcription_start_site | + | 27680 | 27680 | 1303  | 1983 | AN0634 |
| 936  | CONTIG8  | 27153 | 27593 | 1.79 | 2.66E-02 | transcription_start_site | + | 29125 | 29125 | -1752 | 1985 | AN0635 |
| 936  | CONTIG8  | 27153 | 27593 | 1.79 | 2.66E-02 | transcription_start_site | + | 29307 | 29307 | -1934 | 1986 | AN0635 |
| 1648 | CONTIG8  | 28653 | 29314 | 1.18 | 1.57E-01 | transcription_start_site | + | 29125 | 29125 | -141  | 1985 | AN0635 |
| 1648 | CONTIG8  | 28653 | 29314 | 1.18 | 1.57E-01 | transcription_start_site | + | 29307 | 29307 | -323  | 1986 | AN0635 |
| 936  | CONTIG8  | 27153 | 27593 | 1.79 | 2.66E-02 | transcription_start_site | + | 31866 | 31866 | -4493 | 1992 | AN0637 |
| 1648 | CONTIG8  | 28653 | 29314 | 1.18 | 1.57E-01 | transcription_start_site | + | 31866 | 31866 | -2882 | 1992 | AN0637 |
| 1246 | CONTIG8  | 40433 | 40705 | 1.49 | 1.08E-01 | transcription_start_site | - | 36316 | 36316 | -4253 | 1993 | AN0638 |
| 1246 | CONTIG8  | 40433 | 40705 | 1.49 | 1.08E-01 | transcription_start_site | - | 35810 | 35810 | -4759 | 1994 | AN0638 |
| 1246 | CONTIG8  | 40433 | 40705 | 1.49 | 1.08E-01 | transcription_start_site | - | 35672 | 35672 | -4897 | 1995 | AN0638 |
| 1246 | CONTIG8  | 40433 | 40705 | 1.49 | 1.08E-01 | transcription_start_site | - | 40240 | 40240 | -329  | 1998 | AN0640 |
| 1246 | CONTIG8  | 40433 | 40705 | 1.49 | 1.08E-01 | transcription_start_site | - | 39497 | 39497 | -1072 | 1999 | AN0640 |
| 1246 | CONTIG8  | 40433 | 40705 | 1.49 | 1.08E-01 | transcription_start_site | + | 41291 | 41291 | -722  | 2000 | AN0641 |
| 1246 | CONTIG8  | 40433 | 40705 | 1.49 | 1.08E-01 | transcription_start_site | + | 41452 | 41452 | -883  | 2001 | AN0641 |
| 1246 | CONTIG8  | 40433 | 40705 | 1.49 | 1.08E-01 | transcription_start_site | + | 41800 | 41800 | -1231 | 2002 | AN0641 |
| 1246 | CONTIG8  | 40433 | 40705 | 1.49 | 1.08E-01 | transcription_start_site | + | 42015 | 42015 | -1446 | 2003 | AN0641 |
| 1216 | CONTIG9  | 4511  | 4775  | 1.51 | 1.06E-02 | transcription_start_site | - | 1091  | 1091  | -3552 | 2004 | AN0643 |
| 1216 | CONTIG9  | 4511  | 4775  | 1.51 | 1.06E-02 | transcription_start_site | - | 586   | 586   | -4057 | 2005 | AN0643 |
| 1216 | CONTIG9  | 4511  | 4775  | 1.51 | 1.06E-02 | transcription_start_site | - | 4147  | 4147  | -496  | 2006 | AN0644 |
| 1216 | CONTIG9  | 4511  | 4775  | 1.51 | 1.06E-02 | transcription_start_site | - | 3815  | 3815  | -828  | 2007 | AN0644 |
| 1216 | CONTIG9  | 4511  | 4775  | 1.51 | 1.06E-02 | transcription_start_site | - | 5102  | 5102  | 459   | 2010 | AN0645 |
| 1216 | CONTIG9  | 4511  | 4775  | 1.51 | 1.06E-02 | transcription_start_site | - | 5397  | 5397  | 754   | 2009 | AN0645 |
| 1216 | CONTIG9  | 4511  | 4775  | 1.51 | 1.06E-02 | transcription_start_site | - | 5672  | 5672  | 1029  | 2008 | AN0645 |
| 670  | CONTIG10 | 16579 | 16933 | 2.08 | 7.70E-03 | transcription_start_site | - | 15818 | 15818 | -938  | 2025 | AN0651 |
| 670  | CONTIG10 | 16579 | 16933 | 2.08 | 7.70E-03 | transcription_start_site | - | 15648 | 15648 | -1108 | 2026 | AN0651 |
| 670  | CONTIG10 | 16579 | 16933 | 2.08 | 7.70E-03 | transcription_start_site | - | 15252 | 15252 | -1504 | 2027 | AN0651 |
| 670  | CONTIG10 | 16579 | 16933 | 2.08 | 7.70E-03 | transcription_start_site | - | 14643 | 14643 | -2113 | 2028 | AN0651 |
| 670  | CONTIG10 | 16579 | 16933 | 2.08 | 7.70E-03 | transcription_start_site | - | 17599 | 17599 | 843   | 2031 | AN0652 |
| 670  | CONTIG10 | 16579 | 16933 | 2.08 | 7.70E-03 | transcription_start_site | + | 18662 | 18662 | -1906 | 2032 | AN0653 |
| 670  | CONTIG10 | 16579 | 16933 | 2.08 | 7.70E-03 | transcription_start_site | + | 18761 | 18761 | -2005 | 2033 | AN0653 |
| 670  | CONTIG10 | 16579 | 16933 | 2.08 | 7.70E-03 | transcription_start_site | + | 18946 | 18946 | -2190 | 2034 | AN0653 |
| 670  | CONTIG10 | 16579 | 16933 | 2.08 | 7.70E-03 | transcription_start_site | + | 19279 | 19279 | -2523 | 2035 | AN0653 |
| 2075 | CONTIG10 | 29401 | 30069 | 0.9  | 1.81E-01 | transcription_start_site | - | 25990 | 25990 | -3745 | 2042 | AN0657 |
| 2075 | CONTIG10 | 29401 | 30069 | 0.9  | 1.81E-01 | transcription_start_site | - | 25666 | 25666 | -4069 | 2043 | AN0657 |
| 2075 | CONTIG10 | 29401 | 30069 | 0.9  | 1.81E-01 | transcription_start_site | - | 25372 | 25372 | -4363 | 2044 | AN0657 |
| 2075 | CONTIG10 | 29401 | 30069 | 0.9  | 1.81E-01 | transcription_start_site | + | 30005 | 30005 | -270  | 2048 | AN0659 |
| 2075 | CONTIG10 | 29401 | 30069 | 0.9  | 1.81E-01 | transcription_start_site | + | 30083 | 30083 | -348  | 2049 | AN0659 |
| 2075 | CONTIG10 | 29401 | 30069 | 0.9  | 1.81E-01 | transcription_start_site | + | 30964 | 30964 | -1229 | 2050 | AN0659 |
| 1125 | CONTIG10 | 34730 | 35019 | 1.59 | 3.34E-02 | transcription_start_site | + | 35483 | 35483 | -608  | 2051 | AN0660 |
| 1125 | CONTIG10 | 34730 | 35019 | 1.59 | 3.34E-02 | transcription_start_site | + | 35640 | 35640 | -765  | 2052 | AN0660 |
| 1125 | CONTIG10 | 34730 | 35019 | 1.59 | 3.34E-02 | transcription_start_site | + | 36015 | 36015 | -1140 | 2053 | AN0660 |
| 1125 | CONTIG10 | 34730 | 35019 | 1.59 | 3.34E-02 | transcription_start_site | + | 36080 | 36080 | -1205 | 2054 | AN0660 |
| 1125 | CONTIG10 | 34730 | 35019 | 1.59 | 3.34E-02 | transcription_start_site | + | 36860 | 36860 | -1985 | 2055 | AN0660 |
| 1125 | CONTIG10 | 34730 | 35019 | 1.59 | 3.34E-02 | transcription_start_site | + | 38544 | 38544 | -3669 | 2056 | AN0661 |
| 928  | CONTIG10 | 46370 | 47077 | 1.8  | 7.36E-03 | transcription_start_site | - | 42654 | 42654 | -4069 | 2057 | AN0662 |
| 928  | CONTIG10 | 46370 | 47077 | 1.8  | 7.36E-03 | transcription_start_site | - | 42537 | 42537 | -4186 | 2058 | AN0662 |
| 928  | CONTIG10 | 46370 | 47077 | 1.8  | 7.36E-03 | transcription_start_site | - | 42274 | 42274 | -4449 | 2059 | AN0662 |
| 928  | CONTIG10 | 46370 | 47077 | 1.8  | 7.36E-03 | transcription_start_site | - | 41551 | 41551 | -5172 | 2060 | AN0662 |
| 928  | CONTIG10 | 46370 | 47077 | 1.8  | 7.36E-03 | transcription_start_site | + | 46909 | 46909 | -185  | 2061 | AN0663 |
| 928  | CONTIG10 | 46370 | 47077 | 1.8  | 7.36E-03 | transcription_start_site | + | 47302 | 47302 | -578  | 2062 | AN0663 |
| 928  | CONTIG10 | 46370 | 47077 | 1.8  | 7.36E-03 | transcription_start_site | + | 47598 | 47598 | -874  | 2063 | AN0663 |
| 1314 | CONTIG10 | 51007 | 51362 | 1.43 | 5.36E-02 | transcription_start_site | + | 52714 | 52714 | -1529 | 2064 | AN0664 |
| 1824 | CONTIG10 | 49127 | 49569 | 1.06 | 1.54E-01 | transcription_start_site | + | 52714 | 52714 | -3366 | 2064 | AN0664 |
| 1401 | CONTIG10 | 82295 | 82869 | 1.35 | 6.74E-02 | transcription_start_site | - | 77337 | 77337 | -5245 | 2102 | AN0675 |
| 1050 | CONTIG10 | 83195 | 83540 | 1.67 | 2.63E-02 | transcription_start_site | + | 83665 | 83665 | -297  | 2112 | AN0677 |
| 1401 | CONTIG10 | 82295 | 82869 | 1.35 | 6.74E-02 | transcription_start_site | + | 83665 | 83665 | -1083 | 2112 | AN0677 |
| 1817 | CONTIG10 | 88276 | 88783 | 1.06 | 9.90E-02 | transcription_start_site | - | 85381 | 85381 | -3148 | 2113 | AN0678 |

|               |        |        |      |          |                          |   |        |        |       |             |
|---------------|--------|--------|------|----------|--------------------------|---|--------|--------|-------|-------------|
| 1817 CONTIG10 | 88276  | 88783  | 1.06 | 9.90E-02 | transcription_start_site | - | 84806  | 84806  | -3723 | 2114 AN0678 |
| 1817 CONTIG10 | 88276  | 88783  | 1.06 | 9.90E-02 | transcription_start_site | - | 84637  | 84637  | -3892 | 2115 AN0678 |
| 1817 CONTIG10 | 88276  | 88783  | 1.06 | 9.90E-02 | transcription_start_site | + | 88967  | 88967  | -437  | 2116 AN0680 |
| 1817 CONTIG10 | 88276  | 88783  | 1.06 | 9.90E-02 | transcription_start_site | + | 89974  | 89974  | -1444 | 2117 AN0680 |
| 1817 CONTIG10 | 88276  | 88783  | 1.06 | 9.90E-02 | transcription_start_site | + | 90380  | 90380  | -1850 | 2118 AN0680 |
| 1817 CONTIG10 | 88276  | 88783  | 1.06 | 9.90E-02 | transcription_start_site | + | 91385  | 91385  | -2855 | 2119 AN0681 |
| 1817 CONTIG10 | 88276  | 88783  | 1.06 | 9.90E-02 | transcription_start_site | + | 91595  | 91595  | -3065 | 2120 AN0681 |
| 1817 CONTIG10 | 88276  | 88783  | 1.06 | 9.90E-02 | transcription_start_site | + | 93537  | 93537  | -5007 | 2121 AN0682 |
| 399 CONTIG10  | 96542  | 96966  | 2.45 | 1.77E-03 | transcription_start_site | + | 97424  | 97424  | -670  | 2123 AN0683 |
| 399 CONTIG10  | 96542  | 96966  | 2.45 | 1.77E-03 | transcription_start_site | + | 98451  | 98451  | -1697 | 2124 AN0683 |
| 560 CONTIG10  | 99243  | 99732  | 2.24 | 4.57E-03 | transcription_start_site | + | 98451  | 98451  | 1036  | 2124 AN0683 |
| 1220 CONTIG10 | 95107  | 95753  | 1.51 | 2.07E-02 | transcription_start_site | + | 97424  | 97424  | -1994 | 2123 AN0683 |
| 1220 CONTIG10 | 95107  | 95753  | 1.51 | 2.07E-02 | transcription_start_site | + | 98451  | 98451  | -3021 | 2124 AN0683 |
| 399 CONTIG10  | 96542  | 96966  | 2.45 | 1.77E-03 | transcription_start_site | + | 100437 | 100437 | -3683 | 2125 AN0684 |
| 560 CONTIG10  | 99243  | 99732  | 2.24 | 4.57E-03 | transcription_start_site | + | 100437 | 100437 | -949  | 2125 AN0684 |
| 1220 CONTIG10 | 95107  | 95753  | 1.51 | 2.07E-02 | transcription_start_site | + | 100437 | 100437 | -5007 | 2125 AN0684 |
| 560 CONTIG10  | 99243  | 99732  | 2.24 | 4.57E-03 | transcription_start_site | + | 104151 | 104151 | -4663 | 2126 AN0685 |
| 1445 CONTIG10 | 114017 | 114277 | 1.31 | 7.66E-02 | transcription_start_site | - | 113039 | 113039 | -1108 | 2134 AN0688 |
| 1445 CONTIG10 | 114017 | 114277 | 1.31 | 7.66E-02 | transcription_start_site | - | 112722 | 112722 | -1425 | 2135 AN0688 |
| 1445 CONTIG10 | 114017 | 114277 | 1.31 | 7.66E-02 | transcription_start_site | - | 112525 | 112525 | -1622 | 2136 AN0688 |
| 1445 CONTIG10 | 114017 | 114277 | 1.31 | 7.66E-02 | transcription_start_site | - | 112371 | 112371 | -1776 | 2137 AN0688 |
| 1445 CONTIG10 | 114017 | 114277 | 1.31 | 7.66E-02 | transcription_start_site | - | 112020 | 112020 | -2127 | 2138 AN0688 |
| 35 CONTIG10   | 118292 | 119618 | 3.31 | 0.00E+00 | transcription_start_site | - | 117577 | 117577 | -1378 | 2139 AN0689 |
| 35 CONTIG10   | 118292 | 119618 | 3.31 | 0.00E+00 | transcription_start_site | - | 117034 | 117034 | -1921 | 2140 AN0689 |
| 35 CONTIG10   | 118292 | 119618 | 3.31 | 0.00E+00 | transcription_start_site | - | 116666 | 116666 | -2289 | 2141 AN0689 |
| 35 CONTIG10   | 118292 | 119618 | 3.31 | 0.00E+00 | transcription_start_site | - | 116333 | 116333 | -2622 | 2142 AN0689 |
| 35 CONTIG10   | 118292 | 119618 | 3.31 | 0.00E+00 | transcription_start_site | - | 115925 | 115925 | -3030 | 2143 AN0689 |
| 1085 CONTIG10 | 121589 | 122025 | 1.63 | 3.01E-02 | transcription_start_site | - | 117577 | 117577 | -4230 | 2139 AN0689 |
| 1085 CONTIG10 | 121589 | 122025 | 1.63 | 3.01E-02 | transcription_start_site | - | 117034 | 117034 | -4773 | 2140 AN0689 |
| 1085 CONTIG10 | 121589 | 122025 | 1.63 | 3.01E-02 | transcription_start_site | - | 116666 | 116666 | -5141 | 2141 AN0689 |
| 35 CONTIG10   | 118292 | 119618 | 3.31 | 0.00E+00 | transcription_start_site | - | 120027 | 120027 | 1072  | 2147 AN0690 |
| 749 CONTIG10  | 126389 | 126676 | 2    | 9.96E-03 | transcription_start_site | - | 121599 | 121599 | -4933 | 2144 AN0690 |
| 957 CONTIG10  | 124959 | 125400 | 1.76 | 2.05E-02 | transcription_start_site | - | 121599 | 121599 | -3580 | 2144 AN0690 |
| 957 CONTIG10  | 124959 | 125400 | 1.76 | 2.05E-02 | transcription_start_site | - | 121214 | 121214 | -3965 | 2145 AN0690 |
| 957 CONTIG10  | 124959 | 125400 | 1.76 | 2.05E-02 | transcription_start_site | - | 120677 | 120677 | -4502 | 2146 AN0690 |
| 957 CONTIG10  | 124959 | 125400 | 1.76 | 2.05E-02 | transcription_start_site | - | 120027 | 120027 | -5152 | 2147 AN0690 |
| 1085 CONTIG10 | 121589 | 122025 | 1.63 | 3.01E-02 | transcription_start_site | - | 121599 | 121599 | -208  | 2144 AN0690 |
| 1085 CONTIG10 | 121589 | 122025 | 1.63 | 3.01E-02 | transcription_start_site | - | 121214 | 121214 | -593  | 2145 AN0690 |
| 1085 CONTIG10 | 121589 | 122025 | 1.63 | 3.01E-02 | transcription_start_site | - | 120677 | 120677 | -1130 | 2146 AN0690 |
| 1085 CONTIG10 | 121589 | 122025 | 1.63 | 3.01E-02 | transcription_start_site | - | 120027 | 120027 | -1780 | 2147 AN0690 |
| 35 CONTIG10   | 118292 | 119618 | 3.31 | 0.00E+00 | transcription_start_site | + | 121991 | 121991 | -3036 | 2148 AN0691 |
| 35 CONTIG10   | 118292 | 119618 | 3.31 | 0.00E+00 | transcription_start_site | + | 122450 | 122450 | -3495 | 2149 AN0691 |
| 1085 CONTIG10 | 121589 | 122025 | 1.63 | 3.01E-02 | transcription_start_site | + | 121991 | 121991 | -184  | 2148 AN0691 |
| 1085 CONTIG10 | 121589 | 122025 | 1.63 | 3.01E-02 | transcription_start_site | + | 122450 | 122450 | -643  | 2149 AN0691 |
| 749 CONTIG10  | 126389 | 126676 | 2    | 9.96E-03 | transcription_start_site | - | 124498 | 124498 | -2034 | 2150 AN0692 |
| 749 CONTIG10  | 126389 | 126676 | 2    | 9.96E-03 | transcription_start_site | - | 124407 | 124407 | -2125 | 2151 AN0692 |
| 749 CONTIG10  | 126389 | 126676 | 2    | 9.96E-03 | transcription_start_site | - | 124158 | 124158 | -2374 | 2152 AN0692 |
| 749 CONTIG10  | 126389 | 126676 | 2    | 9.96E-03 | transcription_start_site | - | 123833 | 123833 | -2699 | 2153 AN0692 |
| 749 CONTIG10  | 126389 | 126676 | 2    | 9.96E-03 | transcription_start_site | - | 123686 | 123686 | -2846 | 2154 AN0692 |
| 749 CONTIG10  | 126389 | 126676 | 2    | 9.96E-03 | transcription_start_site | - | 123599 | 123599 | -2933 | 2155 AN0692 |
| 749 CONTIG10  | 126389 | 126676 | 2    | 9.96E-03 | transcription_start_site | - | 123338 | 123338 | -3194 | 2156 AN0692 |
| 749 CONTIG10  | 126389 | 126676 | 2    | 9.96E-03 | transcription_start_site | - | 123084 | 123084 | -3448 | 2157 AN0692 |
| 749 CONTIG10  | 126389 | 126676 | 2    | 9.96E-03 | transcription_start_site | - | 122852 | 122852 | -3680 | 2158 AN0692 |
| 749 CONTIG10  | 126389 | 126676 | 2    | 9.96E-03 | transcription_start_site | - | 122676 | 122676 | -3856 | 2159 AN0692 |
| 957 CONTIG10  | 124959 | 125400 | 1.76 | 2.05E-02 | transcription_start_site | - | 124498 | 124498 | -681  | 2150 AN0692 |
| 957 CONTIG10  | 124959 | 125400 | 1.76 | 2.05E-02 | transcription_start_site | - | 124407 | 124407 | -772  | 2151 AN0692 |
| 957 CONTIG10  | 124959 | 125400 | 1.76 | 2.05E-02 | transcription_start_site | - | 124158 | 124158 | -1021 | 2152 AN0692 |

|      |          |        |        |      |          |                          |   |        |        |       |      |        |
|------|----------|--------|--------|------|----------|--------------------------|---|--------|--------|-------|------|--------|
| 957  | CONTIG10 | 124959 | 125400 | 1.76 | 2.05E-02 | transcription_start_site | - | 123833 | 123833 | -1346 | 2153 | AN0692 |
| 957  | CONTIG10 | 124959 | 125400 | 1.76 | 2.05E-02 | transcription_start_site | - | 123686 | 123686 | -1493 | 2154 | AN0692 |
| 957  | CONTIG10 | 124959 | 125400 | 1.76 | 2.05E-02 | transcription_start_site | - | 123599 | 123599 | -1580 | 2155 | AN0692 |
| 957  | CONTIG10 | 124959 | 125400 | 1.76 | 2.05E-02 | transcription_start_site | - | 123338 | 123338 | -1841 | 2156 | AN0692 |
| 957  | CONTIG10 | 124959 | 125400 | 1.76 | 2.05E-02 | transcription_start_site | - | 123084 | 123084 | -2095 | 2157 | AN0692 |
| 957  | CONTIG10 | 124959 | 125400 | 1.76 | 2.05E-02 | transcription_start_site | - | 122852 | 122852 | -2327 | 2158 | AN0692 |
| 957  | CONTIG10 | 124959 | 125400 | 1.76 | 2.05E-02 | transcription_start_site | - | 122676 | 122676 | -2503 | 2159 | AN0692 |
| 1085 | CONTIG10 | 121589 | 122025 | 1.63 | 3.01E-02 | transcription_start_site | - | 122676 | 122676 | 869   | 2159 | AN0692 |
| 1085 | CONTIG10 | 121589 | 122025 | 1.63 | 3.01E-02 | transcription_start_site | - | 122852 | 122852 | 1045  | 2158 | AN0692 |
| 749  | CONTIG10 | 126389 | 126676 | 2    | 9.96E-03 | transcription_start_site | + | 125554 | 125554 | 978   | 2161 | AN0693 |
| 749  | CONTIG10 | 126389 | 126676 | 2    | 9.96E-03 | transcription_start_site | + | 125390 | 125390 | 1142  | 2160 | AN0693 |
| 957  | CONTIG10 | 124959 | 125400 | 1.76 | 2.05E-02 | transcription_start_site | + | 125390 | 125390 | -210  | 2160 | AN0693 |
| 957  | CONTIG10 | 124959 | 125400 | 1.76 | 2.05E-02 | transcription_start_site | + | 125554 | 125554 | -374  | 2161 | AN0693 |
| 1085 | CONTIG10 | 121589 | 122025 | 1.63 | 3.01E-02 | transcription_start_site | + | 125390 | 125390 | -3583 | 2160 | AN0693 |
| 1085 | CONTIG10 | 121589 | 122025 | 1.63 | 3.01E-02 | transcription_start_site | + | 125554 | 125554 | -3747 | 2161 | AN0693 |
| 749  | CONTIG10 | 126389 | 126676 | 2    | 9.96E-03 | transcription_start_site | + | 126723 | 126723 | -190  | 2162 | AN0694 |
| 957  | CONTIG10 | 124959 | 125400 | 1.76 | 2.05E-02 | transcription_start_site | + | 126723 | 126723 | -1543 | 2162 | AN0694 |
| 1085 | CONTIG10 | 121589 | 122025 | 1.63 | 3.01E-02 | transcription_start_site | + | 126723 | 126723 | -4916 | 2162 | AN0694 |
| 749  | CONTIG10 | 126389 | 126676 | 2    | 9.96E-03 | transcription_start_site | + | 129189 | 129189 | -2656 | 2165 | AN0696 |
| 749  | CONTIG10 | 126389 | 126676 | 2    | 9.96E-03 | transcription_start_site | + | 129440 | 129440 | -2907 | 2166 | AN0696 |
| 749  | CONTIG10 | 126389 | 126676 | 2    | 9.96E-03 | transcription_start_site | + | 129622 | 129622 | -3089 | 2167 | AN0696 |
| 957  | CONTIG10 | 124959 | 125400 | 1.76 | 2.05E-02 | transcription_start_site | + | 129189 | 129189 | -4009 | 2165 | AN0696 |
| 957  | CONTIG10 | 124959 | 125400 | 1.76 | 2.05E-02 | transcription_start_site | + | 129440 | 129440 | -4260 | 2166 | AN0696 |
| 957  | CONTIG10 | 124959 | 125400 | 1.76 | 2.05E-02 | transcription_start_site | + | 129622 | 129622 | -4442 | 2167 | AN0696 |
| 324  | CONTIG11 | 8704   | 9064   | 2.58 | 1.41E-03 | transcription_start_site | - | 7662   | 7662   | -1222 | 2212 | AN0709 |
| 356  | CONTIG11 | 7821   | 8613   | 2.53 | 5.08E-03 | transcription_start_site | - | 7662   | 7662   | -555  | 2212 | AN0709 |
| 894  | CONTIG11 | 11419  | 12668  | 1.83 | 0.00E+00 | transcription_start_site | - | 7662   | 7662   | -4381 | 2212 | AN0709 |
| 1663 | CONTIG11 | 10064  | 10703  | 1.17 | 1.76E-01 | transcription_start_site | - | 7662   | 7662   | -2721 | 2212 | AN0709 |
| 995  | CONTIG11 | 25880  | 26394  | 1.73 | 4.20E-02 | transcription_start_site | - | 22386  | 22386  | -3751 | 2215 | AN0711 |
| 995  | CONTIG11 | 25880  | 26394  | 1.73 | 4.20E-02 | transcription_start_site | + | 26567  | 26567  | -430  | 2222 | AN0713 |
| 995  | CONTIG11 | 25880  | 26394  | 1.73 | 4.20E-02 | transcription_start_site | + | 30019  | 30019  | -3882 | 2223 | AN0714 |
| 1338 | CONTIG11 | 46577  | 47011  | 1.41 | 9.60E-02 | transcription_start_site | - | 41916  | 41916  | -4878 | 2236 | AN0719 |
| 1338 | CONTIG11 | 46577  | 47011  | 1.41 | 9.60E-02 | transcription_start_site | - | 44051  | 44051  | -2743 | 2243 | AN0721 |
| 1338 | CONTIG11 | 46577  | 47011  | 1.41 | 9.60E-02 | transcription_start_site | - | 43420  | 43420  | -3374 | 2244 | AN0721 |
| 1338 | CONTIG11 | 46577  | 47011  | 1.41 | 9.60E-02 | transcription_start_site | + | 48130  | 48130  | -1336 | 2250 | AN0723 |
| 1338 | CONTIG11 | 46577  | 47011  | 1.41 | 9.60E-02 | transcription_start_site | + | 48334  | 48334  | -1540 | 2251 | AN0723 |
| 1338 | CONTIG11 | 46577  | 47011  | 1.41 | 9.60E-02 | transcription_start_site | + | 48565  | 48565  | -1771 | 2252 | AN0723 |
| 1511 | CONTIG11 | 60456  | 60739  | 1.27 | 1.38E-01 | transcription_start_site | - | 58016  | 58016  | -2581 | 2253 | AN0725 |
| 1511 | CONTIG11 | 60456  | 60739  | 1.27 | 1.38E-01 | transcription_start_site | - | 57822  | 57822  | -2775 | 2254 | AN0725 |
| 1511 | CONTIG11 | 60456  | 60739  | 1.27 | 1.38E-01 | transcription_start_site | - | 60037  | 60037  | -560  | 2255 | AN0726 |
| 1511 | CONTIG11 | 60456  | 60739  | 1.27 | 1.38E-01 | transcription_start_site | - | 59673  | 59673  | -924  | 2256 | AN0726 |
| 1511 | CONTIG11 | 60456  | 60739  | 1.27 | 1.38E-01 | transcription_start_site | - | 59390  | 59390  | -1207 | 2257 | AN0726 |
| 201  | CONTIG12 | 20251  | 20982  | 2.81 | 0.00E+00 | transcription_start_site | - | 15828  | 15828  | -4788 | 2260 | AN0730 |
| 201  | CONTIG12 | 20251  | 20982  | 2.81 | 0.00E+00 | transcription_start_site | - | 15349  | 15349  | -5267 | 2261 | AN0730 |
| 2297 | CONTIG12 | 15321  | 16475  | 0.67 | 1.13E-01 | transcription_start_site | - | 15828  | 15828  | -70   | 2260 | AN0730 |
| 2297 | CONTIG12 | 15321  | 16475  | 0.67 | 1.13E-01 | transcription_start_site | - | 15349  | 15349  | -549  | 2261 | AN0730 |
| 201  | CONTIG12 | 20251  | 20982  | 2.81 | 0.00E+00 | transcription_start_site | - | 17449  | 17449  | -3167 | 2262 | AN0731 |
| 201  | CONTIG12 | 20251  | 20982  | 2.81 | 0.00E+00 | transcription_start_site | - | 16850  | 16850  | -3766 | 2263 | AN0731 |
| 2297 | CONTIG12 | 15321  | 16475  | 0.67 | 1.13E-01 | transcription_start_site | - | 16850  | 16850  | 952   | 2263 | AN0731 |
| 2297 | CONTIG12 | 15321  | 16475  | 0.67 | 1.13E-01 | transcription_start_site | - | 17449  | 17449  | 1551  | 2262 | AN0731 |
| 201  | CONTIG12 | 20251  | 20982  | 2.81 | 0.00E+00 | transcription_start_site | - | 20029  | 20029  | -587  | 2264 | AN0732 |
| 201  | CONTIG12 | 20251  | 20982  | 2.81 | 0.00E+00 | transcription_start_site | - | 19325  | 19325  | -1291 | 2265 | AN0732 |
| 201  | CONTIG12 | 20251  | 20982  | 2.81 | 0.00E+00 | transcription_start_site | - | 18251  | 18251  | -2365 | 2266 | AN0732 |
| 1249 | CONTIG12 | 23945  | 24969  | 1.48 | 1.44E-02 | transcription_start_site | - | 20029  | 20029  | -4428 | 2264 | AN0732 |
| 1249 | CONTIG12 | 23945  | 24969  | 1.48 | 1.44E-02 | transcription_start_site | - | 19325  | 19325  | -5132 | 2265 | AN0732 |
| 1249 | CONTIG12 | 23945  | 24969  | 1.48 | 1.44E-02 | transcription_start_site | - | 23637  | 23637  | -820  | 2267 | AN0733 |
| 1249 | CONTIG12 | 23945  | 24969  | 1.48 | 1.44E-02 | transcription_start_site | - | 23518  | 23518  | -939  | 2268 | AN0733 |

|      |          |        |        |      |          |                          |   |        |        |       |      |        |
|------|----------|--------|--------|------|----------|--------------------------|---|--------|--------|-------|------|--------|
| 1249 | CONTIG12 | 23945  | 24969  | 1.48 | 1.44E-02 | transcription_start_site | - | 23358  | 23358  | -1099 | 2269 | AN0733 |
| 201  | CONTIG12 | 20251  | 20982  | 2.81 | 0.00E+00 | transcription_start_site | + | 24437  | 24437  | -3820 | 2270 | AN0734 |
| 201  | CONTIG12 | 20251  | 20982  | 2.81 | 0.00E+00 | transcription_start_site | + | 24505  | 24505  | -3888 | 2271 | AN0734 |
| 201  | CONTIG12 | 20251  | 20982  | 2.81 | 0.00E+00 | transcription_start_site | + | 24836  | 24836  | -4219 | 2272 | AN0734 |
| 1249 | CONTIG12 | 23945  | 24969  | 1.48 | 1.44E-02 | transcription_start_site | + | 24437  | 24437  | 20    | 2270 | AN0734 |
| 1249 | CONTIG12 | 23945  | 24969  | 1.48 | 1.44E-02 | transcription_start_site | + | 24505  | 24505  | -48   | 2271 | AN0734 |
| 1249 | CONTIG12 | 23945  | 24969  | 1.48 | 1.44E-02 | transcription_start_site | + | 24836  | 24836  | -379  | 2272 | AN0734 |
| 1249 | CONTIG12 | 23945  | 24969  | 1.48 | 1.44E-02 | transcription_start_site | + | 26496  | 26496  | -2039 | 2273 | AN0735 |
| 1249 | CONTIG12 | 23945  | 24969  | 1.48 | 1.44E-02 | transcription_start_site | + | 26849  | 26849  | -2392 | 2274 | AN0735 |
| 716  | CONTIG12 | 40505  | 40936  | 2.03 | 4.57E-03 | transcription_start_site | - | 40367  | 40367  | -353  | 2287 | AN0740 |
| 716  | CONTIG12 | 40505  | 40936  | 2.03 | 4.57E-03 | transcription_start_site | - | 40292  | 40292  | -428  | 2288 | AN0740 |
| 716  | CONTIG12 | 40505  | 40936  | 2.03 | 4.57E-03 | transcription_start_site | - | 39259  | 39259  | -1461 | 2289 | AN0740 |
| 716  | CONTIG12 | 40505  | 40936  | 2.03 | 4.57E-03 | transcription_start_site | + | 42760  | 42760  | -2039 | 2290 | AN0741 |
| 716  | CONTIG12 | 40505  | 40936  | 2.03 | 4.57E-03 | transcription_start_site | + | 43135  | 43135  | -2414 | 2291 | AN0741 |
| 716  | CONTIG12 | 40505  | 40936  | 2.03 | 4.57E-03 | transcription_start_site | + | 43429  | 43429  | -2708 | 2292 | AN0741 |
| 716  | CONTIG12 | 40505  | 40936  | 2.03 | 4.57E-03 | transcription_start_site | + | 45767  | 45767  | -5046 | 2293 | AN0742 |
| 1023 | CONTIG12 | 45608  | 46027  | 1.7  | 1.37E-02 | transcription_start_site | + | 45767  | 45767  | 50    | 2293 | AN0742 |
| 1023 | CONTIG12 | 45608  | 46027  | 1.7  | 1.37E-02 | transcription_start_site | + | 46127  | 46127  | -309  | 2294 | AN0742 |
| 1023 | CONTIG12 | 45608  | 46027  | 1.7  | 1.37E-02 | transcription_start_site | + | 46204  | 46204  | -386  | 2295 | AN0742 |
| 1023 | CONTIG12 | 45608  | 46027  | 1.7  | 1.37E-02 | transcription_start_site | + | 46374  | 46374  | -556  | 2296 | AN0742 |
| 1023 | CONTIG12 | 45608  | 46027  | 1.7  | 1.37E-02 | transcription_start_site | + | 46800  | 46800  | -982  | 2297 | AN0742 |
| 1023 | CONTIG12 | 45608  | 46027  | 1.7  | 1.37E-02 | transcription_start_site | + | 47108  | 47108  | -1290 | 2298 | AN0742 |
| 2186 | CONTIG12 | 61508  | 62101  | 0.81 | 1.81E-01 | transcription_start_site | + | 62385  | 62385  | -580  | 2317 | AN0748 |
| 2186 | CONTIG12 | 61508  | 62101  | 0.81 | 1.81E-01 | transcription_start_site | + | 62953  | 62953  | -1148 | 2318 | AN0748 |
| 2186 | CONTIG12 | 61508  | 62101  | 0.81 | 1.81E-01 | transcription_start_site | + | 63072  | 63072  | -1267 | 2319 | AN0748 |
| 2186 | CONTIG12 | 61508  | 62101  | 0.81 | 1.81E-01 | transcription_start_site | + | 63535  | 63535  | -1730 | 2320 | AN0748 |
| 2186 | CONTIG12 | 61508  | 62101  | 0.81 | 1.81E-01 | transcription_start_site | + | 63987  | 63987  | -2182 | 2321 | AN0748 |
| 2186 | CONTIG12 | 61508  | 62101  | 0.81 | 1.81E-01 | transcription_start_site | + | 64744  | 64744  | -2939 | 2322 | AN0748 |
| 1202 | CONTIG12 | 81377  | 81801  | 1.52 | 1.30E-02 | transcription_start_site | - | 80479  | 80479  | -1110 | 2335 | AN0751 |
| 1202 | CONTIG12 | 81377  | 81801  | 1.52 | 1.30E-02 | transcription_start_site | - | 80075  | 80075  | -1514 | 2336 | AN0751 |
| 1202 | CONTIG12 | 81377  | 81801  | 1.52 | 1.30E-02 | transcription_start_site | + | 85214  | 85214  | -3625 | 2340 | AN0753 |
| 1202 | CONTIG12 | 81377  | 81801  | 1.52 | 1.30E-02 | transcription_start_site | + | 85450  | 85450  | -3861 | 2341 | AN0753 |
| 1202 | CONTIG12 | 81377  | 81801  | 1.52 | 1.30E-02 | transcription_start_site | + | 86678  | 86678  | -5089 | 2342 | AN0753 |
| 788  | CONTIG12 | 121741 | 122245 | 1.96 | 2.49E-03 | transcription_start_site | - | 118157 | 118157 | -3836 | 2385 | AN0765 |
| 788  | CONTIG12 | 121741 | 122245 | 1.96 | 2.49E-03 | transcription_start_site | - | 117847 | 117847 | -4146 | 2386 | AN0765 |
| 1423 | CONTIG12 | 122636 | 123575 | 1.33 | 4.78E-02 | transcription_start_site | - | 118157 | 118157 | -4948 | 2385 | AN0765 |
| 1423 | CONTIG12 | 122636 | 123575 | 1.33 | 4.78E-02 | transcription_start_site | - | 117847 | 117847 | -5258 | 2386 | AN0765 |
| 788  | CONTIG12 | 121741 | 122245 | 1.96 | 2.49E-03 | transcription_start_site | - | 120946 | 120946 | -1047 | 2387 | AN0766 |
| 788  | CONTIG12 | 121741 | 122245 | 1.96 | 2.49E-03 | transcription_start_site | - | 120277 | 120277 | -1716 | 2388 | AN0766 |
| 1423 | CONTIG12 | 122636 | 123575 | 1.33 | 4.78E-02 | transcription_start_site | - | 120946 | 120946 | -2159 | 2387 | AN0766 |
| 1423 | CONTIG12 | 122636 | 123575 | 1.33 | 4.78E-02 | transcription_start_site | - | 120277 | 120277 | -2828 | 2388 | AN0766 |
| 788  | CONTIG12 | 121741 | 122245 | 1.96 | 2.49E-03 | transcription_start_site | + | 122566 | 122566 | -573  | 2389 | AN0767 |
| 788  | CONTIG12 | 121741 | 122245 | 1.96 | 2.49E-03 | transcription_start_site | + | 122838 | 122838 | -845  | 2390 | AN0767 |
| 788  | CONTIG12 | 121741 | 122245 | 1.96 | 2.49E-03 | transcription_start_site | + | 122962 | 122962 | -969  | 2391 | AN0767 |
| 1423 | CONTIG12 | 122636 | 123575 | 1.33 | 4.78E-02 | transcription_start_site | + | 122962 | 122962 | 143   | 2391 | AN0767 |
| 1423 | CONTIG12 | 122636 | 123575 | 1.33 | 4.78E-02 | transcription_start_site | + | 122838 | 122838 | 267   | 2390 | AN0767 |
| 1423 | CONTIG12 | 122636 | 123575 | 1.33 | 4.78E-02 | transcription_start_site | + | 122566 | 122566 | 539   | 2389 | AN0767 |
| 788  | CONTIG12 | 121741 | 122245 | 1.96 | 2.49E-03 | transcription_start_site | + | 123693 | 123693 | -1700 | 2392 | AN0768 |
| 788  | CONTIG12 | 121741 | 122245 | 1.96 | 2.49E-03 | transcription_start_site | + | 124583 | 124583 | -2590 | 2393 | AN0768 |
| 1423 | CONTIG12 | 122636 | 123575 | 1.33 | 4.78E-02 | transcription_start_site | + | 123693 | 123693 | -587  | 2392 | AN0768 |
| 1423 | CONTIG12 | 122636 | 123575 | 1.33 | 4.78E-02 | transcription_start_site | + | 124583 | 124583 | -1477 | 2393 | AN0768 |
| 339  | CONTIG12 | 131867 | 132951 | 2.55 | 0.00E+00 | transcription_start_site | + | 133388 | 133388 | -979  | 2396 | AN0771 |
| 339  | CONTIG12 | 131867 | 132951 | 2.55 | 0.00E+00 | transcription_start_site | + | 134080 | 134080 | -1671 | 2397 | AN0771 |
| 339  | CONTIG12 | 131867 | 132951 | 2.55 | 0.00E+00 | transcription_start_site | + | 134577 | 134577 | -2168 | 2398 | AN0771 |
| 339  | CONTIG12 | 131867 | 132951 | 2.55 | 0.00E+00 | transcription_start_site | + | 134719 | 134719 | -2310 | 2399 | AN0771 |
| 339  | CONTIG12 | 131867 | 132951 | 2.55 | 0.00E+00 | transcription_start_site | + | 135113 | 135113 | -2704 | 2400 | AN0771 |
| 339  | CONTIG12 | 131867 | 132951 | 2.55 | 0.00E+00 | transcription_start_site | + | 135405 | 135405 | -2996 | 2401 | AN0771 |

|      |          |        |        |      |          |                          |   |        |        |       |      |        |
|------|----------|--------|--------|------|----------|--------------------------|---|--------|--------|-------|------|--------|
| 339  | CONTIG12 | 131867 | 132951 | 2.55 | 0.00E+00 | transcription_start_site | + | 136373 | 136373 | -3964 | 2402 | AN0771 |
| 339  | CONTIG12 | 131867 | 132951 | 2.55 | 0.00E+00 | transcription_start_site | + | 136733 | 136733 | -4324 | 2403 | AN0771 |
| 1424 | CONTIG12 | 143106 | 143605 | 1.33 | 4.78E-02 | transcription_start_site | + | 146071 | 146071 | -2715 | 2404 | AN0773 |
| 489  | CONTIG12 | 164701 | 165066 | 2.33 | 1.09E-03 | transcription_start_site | - | 161377 | 161377 | -3506 | 2426 | AN0779 |
| 489  | CONTIG12 | 164701 | 165066 | 2.33 | 1.09E-03 | transcription_start_site | - | 161115 | 161115 | -3768 | 2427 | AN0779 |
| 489  | CONTIG12 | 164701 | 165066 | 2.33 | 1.09E-03 | transcription_start_site | - | 164440 | 164440 | -443  | 2429 | AN0780 |
| 489  | CONTIG12 | 164701 | 165066 | 2.33 | 1.09E-03 | transcription_start_site | - | 163919 | 163919 | -964  | 2430 | AN0780 |
| 489  | CONTIG12 | 164701 | 165066 | 2.33 | 1.09E-03 | transcription_start_site | - | 163489 | 163489 | -1394 | 2431 | AN0780 |
| 978  | CONTIG12 | 167032 | 167391 | 1.74 | 1.25E-02 | transcription_start_site | - | 164440 | 164440 | -2771 | 2429 | AN0780 |
| 978  | CONTIG12 | 167032 | 167391 | 1.74 | 1.25E-02 | transcription_start_site | - | 163919 | 163919 | -3292 | 2430 | AN0780 |
| 978  | CONTIG12 | 167032 | 167391 | 1.74 | 1.25E-02 | transcription_start_site | - | 163489 | 163489 | -3722 | 2431 | AN0780 |
| 489  | CONTIG12 | 164701 | 165066 | 2.33 | 1.09E-03 | transcription_start_site | + | 166445 | 166445 | -1561 | 2432 | AN0781 |
| 489  | CONTIG12 | 164701 | 165066 | 2.33 | 1.09E-03 | transcription_start_site | + | 167116 | 167116 | -2232 | 2433 | AN0781 |
| 978  | CONTIG12 | 167032 | 167391 | 1.74 | 1.25E-02 | transcription_start_site | + | 167116 | 167116 | 95    | 2433 | AN0781 |
| 978  | CONTIG12 | 167032 | 167391 | 1.74 | 1.25E-02 | transcription_start_site | + | 166445 | 166445 | 766   | 2432 | AN0781 |
| 489  | CONTIG12 | 164701 | 165066 | 2.33 | 1.09E-03 | transcription_start_site | + | 170038 | 170038 | -5154 | 2434 | AN0782 |
| 978  | CONTIG12 | 167032 | 167391 | 1.74 | 1.25E-02 | transcription_start_site | + | 170038 | 170038 | -2826 | 2434 | AN0782 |
| 918  | CONTIG13 | 10357  | 10701  | 1.81 | 3.34E-02 | transcription_start_site | - | 6337   | 6337   | -4192 | 2441 | AN0785 |
| 918  | CONTIG13 | 10357  | 10701  | 1.81 | 3.34E-02 | transcription_start_site | - | 6219   | 6219   | -4310 | 2442 | AN0785 |
| 1016 | CONTIG13 | 7507   | 7851   | 1.71 | 4.20E-02 | transcription_start_site | - | 6337   | 6337   | -1342 | 2441 | AN0785 |
| 1016 | CONTIG13 | 7507   | 7851   | 1.71 | 4.20E-02 | transcription_start_site | - | 6219   | 6219   | -1460 | 2442 | AN0785 |
| 918  | CONTIG13 | 10357  | 10701  | 1.81 | 3.34E-02 | transcription_start_site | - | 7344   | 7344   | -3185 | 2443 | AN0786 |
| 918  | CONTIG13 | 10357  | 10701  | 1.81 | 3.34E-02 | transcription_start_site | - | 6933   | 6933   | -3596 | 2444 | AN0786 |
| 918  | CONTIG13 | 10357  | 10701  | 1.81 | 3.34E-02 | transcription_start_site | - | 6641   | 6641   | -3888 | 2445 | AN0786 |
| 1016 | CONTIG13 | 7507   | 7851   | 1.71 | 4.20E-02 | transcription_start_site | - | 7344   | 7344   | -335  | 2443 | AN0786 |
| 1016 | CONTIG13 | 7507   | 7851   | 1.71 | 4.20E-02 | transcription_start_site | - | 6933   | 6933   | -746  | 2444 | AN0786 |
| 1016 | CONTIG13 | 7507   | 7851   | 1.71 | 4.20E-02 | transcription_start_site | - | 6641   | 6641   | -1038 | 2445 | AN0786 |
| 918  | CONTIG13 | 10357  | 10701  | 1.81 | 3.34E-02 | transcription_start_site | - | 9626   | 9626   | -903  | 2446 | AN0787 |
| 918  | CONTIG13 | 10357  | 10701  | 1.81 | 3.34E-02 | transcription_start_site | - | 8321   | 8321   | -2208 | 2447 | AN0787 |
| 918  | CONTIG13 | 10357  | 10701  | 1.81 | 3.34E-02 | transcription_start_site | - | 8093   | 8093   | -2436 | 2448 | AN0787 |
| 1016 | CONTIG13 | 7507   | 7851   | 1.71 | 4.20E-02 | transcription_start_site | - | 8093   | 8093   | 414   | 2448 | AN0787 |
| 1016 | CONTIG13 | 7507   | 7851   | 1.71 | 4.20E-02 | transcription_start_site | - | 8321   | 8321   | 642   | 2447 | AN0787 |
| 918  | CONTIG13 | 10357  | 10701  | 1.81 | 3.34E-02 | transcription_start_site | + | 10595  | 10595  | -66   | 2449 | AN0788 |
| 1016 | CONTIG13 | 7507   | 7851   | 1.71 | 4.20E-02 | transcription_start_site | + | 10595  | 10595  | -2916 | 2449 | AN0788 |
| 14   | CONTIG13 | 57315  | 57879  | 3.52 | 0.00E+00 | transcription_start_site | - | 53115  | 53115  | -4482 | 2500 | AN0805 |
| 804  | CONTIG13 | 55295  | 55707  | 1.94 | 1.06E-02 | transcription_start_site | - | 53115  | 53115  | -2386 | 2500 | AN0805 |
| 14   | CONTIG13 | 57315  | 57879  | 3.52 | 0.00E+00 | transcription_start_site | - | 55324  | 55324  | -2273 | 2501 | AN0806 |
| 14   | CONTIG13 | 57315  | 57879  | 3.52 | 0.00E+00 | transcription_start_site | - | 54888  | 54888  | -2709 | 2502 | AN0806 |
| 14   | CONTIG13 | 57315  | 57879  | 3.52 | 0.00E+00 | transcription_start_site | - | 54678  | 54678  | -2919 | 2503 | AN0806 |
| 14   | CONTIG13 | 57315  | 57879  | 3.52 | 0.00E+00 | transcription_start_site | - | 54550  | 54550  | -3047 | 2504 | AN0806 |
| 14   | CONTIG13 | 57315  | 57879  | 3.52 | 0.00E+00 | transcription_start_site | - | 54141  | 54141  | -3456 | 2505 | AN0806 |
| 14   | CONTIG13 | 57315  | 57879  | 3.52 | 0.00E+00 | transcription_start_site | - | 53964  | 53964  | -3633 | 2506 | AN0806 |
| 804  | CONTIG13 | 55295  | 55707  | 1.94 | 1.06E-02 | transcription_start_site | - | 55324  | 55324  | -177  | 2501 | AN0806 |
| 804  | CONTIG13 | 55295  | 55707  | 1.94 | 1.06E-02 | transcription_start_site | - | 54888  | 54888  | -613  | 2502 | AN0806 |
| 804  | CONTIG13 | 55295  | 55707  | 1.94 | 1.06E-02 | transcription_start_site | - | 54678  | 54678  | -823  | 2503 | AN0806 |
| 804  | CONTIG13 | 55295  | 55707  | 1.94 | 1.06E-02 | transcription_start_site | - | 54550  | 54550  | -951  | 2504 | AN0806 |
| 804  | CONTIG13 | 55295  | 55707  | 1.94 | 1.06E-02 | transcription_start_site | - | 54141  | 54141  | -1360 | 2505 | AN0806 |
| 804  | CONTIG13 | 55295  | 55707  | 1.94 | 1.06E-02 | transcription_start_site | - | 53964  | 53964  | -1537 | 2506 | AN0806 |
| 14   | CONTIG13 | 57315  | 57879  | 3.52 | 0.00E+00 | transcription_start_site | + | 59230  | 59230  | -1633 | 2507 | AN0807 |
| 14   | CONTIG13 | 57315  | 57879  | 3.52 | 0.00E+00 | transcription_start_site | + | 59557  | 59557  | -1960 | 2508 | AN0807 |
| 804  | CONTIG13 | 55295  | 55707  | 1.94 | 1.06E-02 | transcription_start_site | + | 59230  | 59230  | -3729 | 2507 | AN0807 |
| 804  | CONTIG13 | 55295  | 55707  | 1.94 | 1.06E-02 | transcription_start_site | + | 59557  | 59557  | -4056 | 2508 | AN0807 |
| 1417 | CONTIG13 | 79212  | 79495  | 1.34 | 1.08E-01 | transcription_start_site | + | 84028  | 84028  | -4674 | 2533 | AN0814 |
| 913  | CONTIG13 | 93530  | 94250  | 1.81 | 0.00E+00 | transcription_start_site | - | 92803  | 92803  | -1087 | 2541 | AN0817 |
| 913  | CONTIG13 | 93530  | 94250  | 1.81 | 0.00E+00 | transcription_start_site | - | 92403  | 92403  | -1487 | 2542 | AN0817 |
| 913  | CONTIG13 | 93530  | 94250  | 1.81 | 0.00E+00 | transcription_start_site | - | 91304  | 91304  | -2586 | 2543 | AN0817 |
| 913  | CONTIG13 | 93530  | 94250  | 1.81 | 0.00E+00 | transcription_start_site | + | 95241  | 95241  | -1351 | 2544 | AN0818 |

|      |          |        |        |      |          |                          |   |        |        |       |      |        |
|------|----------|--------|--------|------|----------|--------------------------|---|--------|--------|-------|------|--------|
| 913  | CONTIG13 | 93530  | 94250  | 1.81 | 0.00E+00 | transcription_start_site | + | 95477  | 95477  | -1587 | 2545 | AN0818 |
| 913  | CONTIG13 | 93530  | 94250  | 1.81 | 0.00E+00 | transcription_start_site | + | 97419  | 97419  | -3529 | 2546 | AN0818 |
| 913  | CONTIG13 | 93530  | 94250  | 1.81 | 0.00E+00 | transcription_start_site | + | 97959  | 97959  | -4069 | 2547 | AN0819 |
| 913  | CONTIG13 | 93530  | 94250  | 1.81 | 0.00E+00 | transcription_start_site | + | 98098  | 98098  | -4208 | 2548 | AN0819 |
| 913  | CONTIG13 | 93530  | 94250  | 1.81 | 0.00E+00 | transcription_start_site | + | 98283  | 98283  | -4393 | 2549 | AN0819 |
| 913  | CONTIG13 | 93530  | 94250  | 1.81 | 0.00E+00 | transcription_start_site | + | 98448  | 98448  | -4558 | 2550 | AN0819 |
| 539  | CONTIG13 | 115442 | 115701 | 2.27 | 9.96E-03 | transcription_start_site | - | 113712 | 113712 | -1859 | 2553 | AN0822 |
| 539  | CONTIG13 | 115442 | 115701 | 2.27 | 9.96E-03 | transcription_start_site | - | 113623 | 113623 | -1948 | 2554 | AN0822 |
| 539  | CONTIG13 | 115442 | 115701 | 2.27 | 9.96E-03 | transcription_start_site | - | 112222 | 112222 | -3349 | 2555 | AN0822 |
| 539  | CONTIG13 | 115442 | 115701 | 2.27 | 9.96E-03 | transcription_start_site | + | 119563 | 119563 | -3991 | 2558 | AN0824 |
| 539  | CONTIG13 | 115442 | 115701 | 2.27 | 9.96E-03 | transcription_start_site | + | 119763 | 119763 | -4191 | 2559 | AN0824 |
| 539  | CONTIG13 | 115442 | 115701 | 2.27 | 9.96E-03 | transcription_start_site | + | 120685 | 120685 | -5113 | 2560 | AN0824 |
| 264  | CONTIG13 | 126677 | 127027 | 2.69 | 2.61E-03 | transcription_start_site | - | 123015 | 123015 | -3837 | 2561 | AN0825 |
| 264  | CONTIG13 | 126677 | 127027 | 2.69 | 2.61E-03 | transcription_start_site | - | 122634 | 122634 | -4218 | 2562 | AN0825 |
| 264  | CONTIG13 | 126677 | 127027 | 2.69 | 2.61E-03 | transcription_start_site | - | 122021 | 122021 | -4831 | 2563 | AN0825 |
| 264  | CONTIG13 | 126677 | 127027 | 2.69 | 2.61E-03 | transcription_start_site | - | 121833 | 121833 | -5019 | 2564 | AN0825 |
| 1360 | CONTIG13 | 124282 | 124626 | 1.39 | 9.60E-02 | transcription_start_site | - | 123015 | 123015 | -1439 | 2561 | AN0825 |
| 1360 | CONTIG13 | 124282 | 124626 | 1.39 | 9.60E-02 | transcription_start_site | - | 122634 | 122634 | -1820 | 2562 | AN0825 |
| 1360 | CONTIG13 | 124282 | 124626 | 1.39 | 9.60E-02 | transcription_start_site | - | 122021 | 122021 | -2433 | 2563 | AN0825 |
| 1360 | CONTIG13 | 124282 | 124626 | 1.39 | 9.60E-02 | transcription_start_site | - | 121833 | 121833 | -2621 | 2564 | AN0825 |
| 1461 | CONTIG13 | 127277 | 128002 | 1.3  | 7.38E-02 | transcription_start_site | - | 123015 | 123015 | -4624 | 2561 | AN0825 |
| 1461 | CONTIG13 | 127277 | 128002 | 1.3  | 7.38E-02 | transcription_start_site | - | 122634 | 122634 | -5005 | 2562 | AN0825 |
| 264  | CONTIG13 | 126677 | 127027 | 2.69 | 2.61E-03 | transcription_start_site | - | 126449 | 126449 | -403  | 2565 | AN0826 |
| 1461 | CONTIG13 | 127277 | 128002 | 1.3  | 7.38E-02 | transcription_start_site | - | 126449 | 126449 | -1190 | 2565 | AN0826 |
| 264  | CONTIG13 | 126677 | 127027 | 2.69 | 2.61E-03 | transcription_start_site | + | 128594 | 128594 | -1742 | 2566 | AN0827 |
| 264  | CONTIG13 | 126677 | 127027 | 2.69 | 2.61E-03 | transcription_start_site | + | 128762 | 128762 | -1910 | 2567 | AN0827 |
| 264  | CONTIG13 | 126677 | 127027 | 2.69 | 2.61E-03 | transcription_start_site | + | 129768 | 129768 | -2916 | 2568 | AN0827 |
| 1360 | CONTIG13 | 124282 | 124626 | 1.39 | 9.60E-02 | transcription_start_site | + | 128594 | 128594 | -4140 | 2566 | AN0827 |
| 1360 | CONTIG13 | 124282 | 124626 | 1.39 | 9.60E-02 | transcription_start_site | + | 128762 | 128762 | -4308 | 2567 | AN0827 |
| 1461 | CONTIG13 | 127277 | 128002 | 1.3  | 7.38E-02 | transcription_start_site | + | 128594 | 128594 | -954  | 2566 | AN0827 |
| 1461 | CONTIG13 | 127277 | 128002 | 1.3  | 7.38E-02 | transcription_start_site | + | 128762 | 128762 | -1122 | 2567 | AN0827 |
| 1461 | CONTIG13 | 127277 | 128002 | 1.3  | 7.38E-02 | transcription_start_site | + | 129768 | 129768 | -2128 | 2568 | AN0827 |
| 264  | CONTIG13 | 126677 | 127027 | 2.69 | 2.61E-03 | transcription_start_site | + | 130677 | 130677 | -3825 | 2569 | AN0828 |
| 264  | CONTIG13 | 126677 | 127027 | 2.69 | 2.61E-03 | transcription_start_site | + | 130888 | 130888 | -4036 | 2570 | AN0828 |
| 264  | CONTIG13 | 126677 | 127027 | 2.69 | 2.61E-03 | transcription_start_site | + | 131529 | 131529 | -4677 | 2571 | AN0828 |
| 1461 | CONTIG13 | 127277 | 128002 | 1.3  | 7.38E-02 | transcription_start_site | + | 130677 | 130677 | -3037 | 2569 | AN0828 |
| 1461 | CONTIG13 | 127277 | 128002 | 1.3  | 7.38E-02 | transcription_start_site | + | 130888 | 130888 | -3248 | 2570 | AN0828 |
| 1461 | CONTIG13 | 127277 | 128002 | 1.3  | 7.38E-02 | transcription_start_site | + | 131529 | 131529 | -3889 | 2571 | AN0828 |
| 1610 | CONTIG13 | 139283 | 139632 | 1.2  | 1.54E-01 | transcription_start_site | - | 134919 | 134919 | -4538 | 2572 | AN0829 |
| 1610 | CONTIG13 | 139283 | 139632 | 1.2  | 1.54E-01 | transcription_start_site | - | 134458 | 134458 | -4999 | 2573 | AN0829 |
| 1610 | CONTIG13 | 139283 | 139632 | 1.2  | 1.54E-01 | transcription_start_site | - | 136908 | 136908 | -2549 | 2576 | AN0830 |
| 1610 | CONTIG13 | 139283 | 139632 | 1.2  | 1.54E-01 | transcription_start_site | - | 136211 | 136211 | -3246 | 2577 | AN0830 |
| 612  | CONTIG13 | 142128 | 142407 | 2.18 | 1.25E-02 | transcription_start_site | - | 139189 | 139189 | -3078 | 2578 | AN0831 |
| 612  | CONTIG13 | 142128 | 142407 | 2.18 | 1.25E-02 | transcription_start_site | - | 138676 | 138676 | -3591 | 2579 | AN0831 |
| 612  | CONTIG13 | 142128 | 142407 | 2.18 | 1.25E-02 | transcription_start_site | - | 138319 | 138319 | -3948 | 2580 | AN0831 |
| 1610 | CONTIG13 | 139283 | 139632 | 1.2  | 1.54E-01 | transcription_start_site | - | 139189 | 139189 | -268  | 2578 | AN0831 |
| 1610 | CONTIG13 | 139283 | 139632 | 1.2  | 1.54E-01 | transcription_start_site | - | 138676 | 138676 | -781  | 2579 | AN0831 |
| 1610 | CONTIG13 | 139283 | 139632 | 1.2  | 1.54E-01 | transcription_start_site | - | 138319 | 138319 | -1138 | 2580 | AN0831 |
| 1669 | CONTIG13 | 144003 | 144277 | 1.16 | 1.76E-01 | transcription_start_site | - | 139189 | 139189 | -4951 | 2578 | AN0831 |
| 1610 | CONTIG13 | 139283 | 139632 | 1.2  | 1.54E-01 | transcription_start_site | + | 139812 | 139812 | -354  | 2581 | AN0832 |
| 1610 | CONTIG13 | 139283 | 139632 | 1.2  | 1.54E-01 | transcription_start_site | + | 140006 | 140006 | -548  | 2582 | AN0832 |
| 1610 | CONTIG13 | 139283 | 139632 | 1.2  | 1.54E-01 | transcription_start_site | + | 140458 | 140458 | -1000 | 2583 | AN0832 |
| 612  | CONTIG13 | 142128 | 142407 | 2.18 | 1.25E-02 | transcription_start_site | + | 142968 | 142968 | -700  | 2584 | AN0833 |
| 612  | CONTIG13 | 142128 | 142407 | 2.18 | 1.25E-02 | transcription_start_site | + | 143352 | 143352 | -1084 | 2585 | AN0833 |
| 1610 | CONTIG13 | 139283 | 139632 | 1.2  | 1.54E-01 | transcription_start_site | + | 142968 | 142968 | -3510 | 2584 | AN0833 |
| 1610 | CONTIG13 | 139283 | 139632 | 1.2  | 1.54E-01 | transcription_start_site | + | 143352 | 143352 | -3894 | 2585 | AN0833 |
| 1669 | CONTIG13 | 144003 | 144277 | 1.16 | 1.76E-01 | transcription_start_site | + | 143352 | 143352 | 788   | 2585 | AN0833 |



|      |          |        |        |      |          |                          |   |        |        |       |      |        |
|------|----------|--------|--------|------|----------|--------------------------|---|--------|--------|-------|------|--------|
| 612  | CONTIG13 | 142128 | 142407 | 2.18 | 1.25E-02 | transcription_start_site | + | 144482 | 144482 | -2214 | 2586 | AN0834 |
| 612  | CONTIG13 | 142128 | 142407 | 2.18 | 1.25E-02 | transcription_start_site | + | 144576 | 144576 | -2308 | 2587 | AN0834 |
| 612  | CONTIG13 | 142128 | 142407 | 2.18 | 1.25E-02 | transcription_start_site | + | 144725 | 144725 | -2457 | 2588 | AN0834 |
| 612  | CONTIG13 | 142128 | 142407 | 2.18 | 1.25E-02 | transcription_start_site | + | 145016 | 145016 | -2748 | 2589 | AN0834 |
| 612  | CONTIG13 | 142128 | 142407 | 2.18 | 1.25E-02 | transcription_start_site | + | 145724 | 145724 | -3456 | 2590 | AN0834 |
| 612  | CONTIG13 | 142128 | 142407 | 2.18 | 1.25E-02 | transcription_start_site | + | 146715 | 146715 | -4447 | 2591 | AN0834 |
| 1610 | CONTIG13 | 139283 | 139632 | 1.2  | 1.54E-01 | transcription_start_site | + | 144482 | 144482 | -5024 | 2586 | AN0834 |
| 1610 | CONTIG13 | 139283 | 139632 | 1.2  | 1.54E-01 | transcription_start_site | + | 144576 | 144576 | -5118 | 2587 | AN0834 |
| 1669 | CONTIG13 | 144003 | 144277 | 1.16 | 1.76E-01 | transcription_start_site | + | 144482 | 144482 | -342  | 2586 | AN0834 |
| 1669 | CONTIG13 | 144003 | 144277 | 1.16 | 1.76E-01 | transcription_start_site | + | 144576 | 144576 | -436  | 2587 | AN0834 |
| 1669 | CONTIG13 | 144003 | 144277 | 1.16 | 1.76E-01 | transcription_start_site | + | 144725 | 144725 | -585  | 2588 | AN0834 |
| 1669 | CONTIG13 | 144003 | 144277 | 1.16 | 1.76E-01 | transcription_start_site | + | 145016 | 145016 | -876  | 2589 | AN0834 |
| 1669 | CONTIG13 | 144003 | 144277 | 1.16 | 1.76E-01 | transcription_start_site | + | 145724 | 145724 | -1584 | 2590 | AN0834 |
| 1669 | CONTIG13 | 144003 | 144277 | 1.16 | 1.76E-01 | transcription_start_site | + | 146715 | 146715 | -2575 | 2591 | AN0834 |
| 1192 | CONTIG13 | 206644 | 207068 | 1.53 | 2.43E-02 | transcription_start_site | - | 201918 | 201918 | -4938 | 2633 | AN0850 |
| 1192 | CONTIG13 | 206644 | 207068 | 1.53 | 2.43E-02 | transcription_start_site | - | 201733 | 201733 | -5123 | 2634 | AN0850 |
| 1192 | CONTIG13 | 206644 | 207068 | 1.53 | 2.43E-02 | transcription_start_site | - | 201645 | 201645 | -5211 | 2635 | AN0850 |
| 1192 | CONTIG13 | 206644 | 207068 | 1.53 | 2.43E-02 | transcription_start_site | - | 204133 | 204133 | -2723 | 2642 | AN0852 |
| 1192 | CONTIG13 | 206644 | 207068 | 1.53 | 2.43E-02 | transcription_start_site | - | 203973 | 203973 | -2883 | 2643 | AN0852 |
| 1192 | CONTIG13 | 206644 | 207068 | 1.53 | 2.43E-02 | transcription_start_site | - | 203676 | 203676 | -3180 | 2644 | AN0852 |
| 1192 | CONTIG13 | 206644 | 207068 | 1.53 | 2.43E-02 | transcription_start_site | + | 206743 | 206743 | 113   | 2647 | AN0853 |
| 1192 | CONTIG13 | 206644 | 207068 | 1.53 | 2.43E-02 | transcription_start_site | + | 206568 | 206568 | 288   | 2646 | AN0853 |
| 1192 | CONTIG13 | 206644 | 207068 | 1.53 | 2.43E-02 | transcription_start_site | + | 208027 | 208027 | -1171 | 2648 | AN0854 |
| 263  | CONTIG13 | 219155 | 219517 | 2.69 | 1.14E-03 | transcription_start_site | - | 216962 | 216962 | -2374 | 2649 | AN0855 |
| 263  | CONTIG13 | 219155 | 219517 | 2.69 | 1.14E-03 | transcription_start_site | - | 216580 | 216580 | -2756 | 2650 | AN0855 |
| 295  | CONTIG13 | 221120 | 221394 | 2.64 | 3.37E-03 | transcription_start_site | - | 216962 | 216962 | -4295 | 2649 | AN0855 |
| 295  | CONTIG13 | 221120 | 221394 | 2.64 | 3.37E-03 | transcription_start_site | - | 216580 | 216580 | -4677 | 2650 | AN0855 |
| 344  | CONTIG13 | 221790 | 222219 | 2.55 | 4.57E-03 | transcription_start_site | - | 216962 | 216962 | -5042 | 2649 | AN0855 |
| 263  | CONTIG13 | 219155 | 219517 | 2.69 | 1.14E-03 | transcription_start_site | - | 218925 | 218925 | -411  | 2651 | AN0856 |
| 263  | CONTIG13 | 219155 | 219517 | 2.69 | 1.14E-03 | transcription_start_site | - | 218558 | 218558 | -778  | 2652 | AN0856 |
| 295  | CONTIG13 | 221120 | 221394 | 2.64 | 3.37E-03 | transcription_start_site | - | 218925 | 218925 | -2332 | 2651 | AN0856 |
| 295  | CONTIG13 | 221120 | 221394 | 2.64 | 3.37E-03 | transcription_start_site | - | 218558 | 218558 | -2699 | 2652 | AN0856 |
| 344  | CONTIG13 | 221790 | 222219 | 2.55 | 4.57E-03 | transcription_start_site | - | 218925 | 218925 | -3079 | 2651 | AN0856 |
| 344  | CONTIG13 | 221790 | 222219 | 2.55 | 4.57E-03 | transcription_start_site | - | 218558 | 218558 | -3446 | 2652 | AN0856 |
| 263  | CONTIG13 | 219155 | 219517 | 2.69 | 1.14E-03 | transcription_start_site | + | 222603 | 222603 | -3267 | 2653 | AN0857 |
| 263  | CONTIG13 | 219155 | 219517 | 2.69 | 1.14E-03 | transcription_start_site | + | 222703 | 222703 | -3367 | 2654 | AN0857 |
| 263  | CONTIG13 | 219155 | 219517 | 2.69 | 1.14E-03 | transcription_start_site | + | 222872 | 222872 | -3536 | 2655 | AN0857 |
| 263  | CONTIG13 | 219155 | 219517 | 2.69 | 1.14E-03 | transcription_start_site | + | 223213 | 223213 | -3877 | 2656 | AN0857 |
| 263  | CONTIG13 | 219155 | 219517 | 2.69 | 1.14E-03 | transcription_start_site | + | 223397 | 223397 | -4061 | 2657 | AN0857 |
| 295  | CONTIG13 | 221120 | 221394 | 2.64 | 3.37E-03 | transcription_start_site | + | 222603 | 222603 | -1346 | 2653 | AN0857 |
| 295  | CONTIG13 | 221120 | 221394 | 2.64 | 3.37E-03 | transcription_start_site | + | 222703 | 222703 | -1446 | 2654 | AN0857 |
| 295  | CONTIG13 | 221120 | 221394 | 2.64 | 3.37E-03 | transcription_start_site | + | 222872 | 222872 | -1615 | 2655 | AN0857 |
| 295  | CONTIG13 | 221120 | 221394 | 2.64 | 3.37E-03 | transcription_start_site | + | 223213 | 223213 | -1956 | 2656 | AN0857 |
| 295  | CONTIG13 | 221120 | 221394 | 2.64 | 3.37E-03 | transcription_start_site | + | 223397 | 223397 | -2140 | 2657 | AN0857 |
| 344  | CONTIG13 | 221790 | 222219 | 2.55 | 4.57E-03 | transcription_start_site | + | 222603 | 222603 | -598  | 2653 | AN0857 |
| 344  | CONTIG13 | 221790 | 222219 | 2.55 | 4.57E-03 | transcription_start_site | + | 222703 | 222703 | -698  | 2654 | AN0857 |
| 344  | CONTIG13 | 221790 | 222219 | 2.55 | 4.57E-03 | transcription_start_site | + | 222872 | 222872 | -867  | 2655 | AN0857 |
| 344  | CONTIG13 | 221790 | 222219 | 2.55 | 4.57E-03 | transcription_start_site | + | 223213 | 223213 | -1208 | 2656 | AN0857 |
| 344  | CONTIG13 | 221790 | 222219 | 2.55 | 4.57E-03 | transcription_start_site | + | 223397 | 223397 | -1392 | 2657 | AN0857 |
| 132  | CONTIG13 | 231755 | 232329 | 3.01 | 7.06E-04 | transcription_start_site | - | 229869 | 229869 | -2173 | 2658 | AN0858 |
| 132  | CONTIG13 | 231755 | 232329 | 3.01 | 7.06E-04 | transcription_start_site | - | 232511 | 232511 | 469   | 2659 | AN0859 |
| 132  | CONTIG13 | 231755 | 232329 | 3.01 | 7.06E-04 | transcription_start_site | - | 231281 | 231281 | -761  | 2660 | AN0859 |
| 132  | CONTIG13 | 231755 | 232329 | 3.01 | 7.06E-04 | transcription_start_site | + | 233277 | 233277 | -1235 | 2661 | AN0860 |
| 132  | CONTIG13 | 231755 | 232329 | 3.01 | 7.06E-04 | transcription_start_site | + | 233427 | 233427 | -1385 | 2662 | AN0860 |
| 132  | CONTIG13 | 231755 | 232329 | 3.01 | 7.06E-04 | transcription_start_site | + | 233673 | 233673 | -1631 | 2663 | AN0860 |
| 132  | CONTIG13 | 231755 | 232329 | 3.01 | 7.06E-04 | transcription_start_site | + | 234657 | 234657 | -2615 | 2664 | AN0860 |
| 111  | CONTIG13 | 243392 | 243662 | 3.06 | 3.81E-04 | transcription_start_site | - | 240869 | 240869 | -2658 | 2672 | AN0863 |

|      |          |        |        |      |          |                          |   |        |        |       |      |        |
|------|----------|--------|--------|------|----------|--------------------------|---|--------|--------|-------|------|--------|
| 111  | CONTIG13 | 243392 | 243662 | 3.06 | 3.81E-04 | transcription_start_site | - | 240382 | 240382 | -3145 | 2673 | AN0863 |
| 111  | CONTIG13 | 243392 | 243662 | 3.06 | 3.81E-04 | transcription_start_site | - | 240082 | 240082 | -3445 | 2674 | AN0863 |
| 111  | CONTIG13 | 243392 | 243662 | 3.06 | 3.81E-04 | transcription_start_site | - | 239405 | 239405 | -4122 | 2675 | AN0863 |
| 436  | CONTIG13 | 244578 | 244927 | 2.41 | 7.08E-03 | transcription_start_site | - | 240869 | 240869 | -3883 | 2672 | AN0863 |
| 436  | CONTIG13 | 244578 | 244927 | 2.41 | 7.08E-03 | transcription_start_site | - | 240382 | 240382 | -4370 | 2673 | AN0863 |
| 436  | CONTIG13 | 244578 | 244927 | 2.41 | 7.08E-03 | transcription_start_site | - | 240082 | 240082 | -4670 | 2674 | AN0863 |
| 436  | CONTIG13 | 244578 | 244927 | 2.41 | 7.08E-03 | transcription_start_site | - | 245340 | 245340 | 587   | 2681 | AN0864 |
| 436  | CONTIG13 | 244578 | 244927 | 2.41 | 7.08E-03 | transcription_start_site | - | 245589 | 245589 | 836   | 2680 | AN0864 |
| 436  | CONTIG13 | 244578 | 244927 | 2.41 | 7.08E-03 | transcription_start_site | - | 245683 | 245683 | 930   | 2679 | AN0864 |
| 111  | CONTIG13 | 243392 | 243662 | 3.06 | 3.81E-04 | transcription_start_site | + | 247571 | 247571 | -4044 | 2682 | AN0865 |
| 111  | CONTIG13 | 243392 | 243662 | 3.06 | 3.81E-04 | transcription_start_site | + | 247831 | 247831 | -4304 | 2683 | AN0865 |
| 436  | CONTIG13 | 244578 | 244927 | 2.41 | 7.08E-03 | transcription_start_site | + | 247571 | 247571 | -2818 | 2682 | AN0865 |
| 436  | CONTIG13 | 244578 | 244927 | 2.41 | 7.08E-03 | transcription_start_site | + | 247831 | 247831 | -3078 | 2683 | AN0865 |
| 303  | CONTIG14 | 1576   | 1850   | 2.62 | 2.06E-04 | transcription_start_site | + | 2708   | 2708   | -995  | 2684 | AN0866 |
| 303  | CONTIG14 | 1576   | 1850   | 2.62 | 2.06E-04 | transcription_start_site | + | 3222   | 3222   | -1509 | 2685 | AN0866 |
| 303  | CONTIG14 | 1576   | 1850   | 2.62 | 2.06E-04 | transcription_start_site | + | 4205   | 4205   | -2492 | 2686 | AN0866 |
| 303  | CONTIG14 | 1576   | 1850   | 2.62 | 2.06E-04 | transcription_start_site | + | 4708   | 4708   | -2995 | 2687 | AN0866 |
| 1715 | CONTIG14 | 2796   | 3370   | 1.13 | 1.08E-01 | transcription_start_site | + | 3222   | 3222   | -139  | 2685 | AN0866 |
| 1715 | CONTIG14 | 2796   | 3370   | 1.13 | 1.08E-01 | transcription_start_site | + | 2708   | 2708   | 375   | 2684 | AN0866 |
| 1715 | CONTIG14 | 2796   | 3370   | 1.13 | 1.08E-01 | transcription_start_site | + | 4205   | 4205   | -1122 | 2686 | AN0866 |
| 1715 | CONTIG14 | 2796   | 3370   | 1.13 | 1.08E-01 | transcription_start_site | + | 4708   | 4708   | -1625 | 2687 | AN0866 |
| 1656 | CONTIG14 | 7446   | 7860   | 1.17 | 5.49E-02 | transcription_start_site | + | 9422   | 9422   | -1769 | 2688 | AN0867 |
| 1656 | CONTIG14 | 7446   | 7860   | 1.17 | 5.49E-02 | transcription_start_site | + | 10054  | 10054  | -2401 | 2689 | AN0867 |
| 1656 | CONTIG14 | 7446   | 7860   | 1.17 | 5.49E-02 | transcription_start_site | + | 10235  | 10235  | -2582 | 2690 | AN0867 |
| 242  | CONTIG14 | 17936  | 18275  | 2.73 | 2.69E-04 | transcription_start_site | - | 13956  | 13956  | -4149 | 2694 | AN0869 |
| 242  | CONTIG14 | 17936  | 18275  | 2.73 | 2.69E-04 | transcription_start_site | - | 13774  | 13774  | -4331 | 2695 | AN0869 |
| 242  | CONTIG14 | 17936  | 18275  | 2.73 | 2.69E-04 | transcription_start_site | - | 13526  | 13526  | -4579 | 2696 | AN0869 |
| 242  | CONTIG14 | 17936  | 18275  | 2.73 | 2.69E-04 | transcription_start_site | - | 17411  | 17411  | -694  | 2697 | AN0870 |
| 242  | CONTIG14 | 17936  | 18275  | 2.73 | 2.69E-04 | transcription_start_site | - | 17163  | 17163  | -942  | 2698 | AN0870 |
| 242  | CONTIG14 | 17936  | 18275  | 2.73 | 2.69E-04 | transcription_start_site | - | 16686  | 16686  | -1419 | 2699 | AN0870 |
| 242  | CONTIG14 | 17936  | 18275  | 2.73 | 2.69E-04 | transcription_start_site | - | 16339  | 16339  | -1766 | 2700 | AN0870 |
| 242  | CONTIG14 | 17936  | 18275  | 2.73 | 2.69E-04 | transcription_start_site | + | 20114  | 20114  | -2008 | 2701 | AN0871 |
| 242  | CONTIG14 | 17936  | 18275  | 2.73 | 2.69E-04 | transcription_start_site | + | 21910  | 21910  | -3804 | 2702 | AN0872 |
| 242  | CONTIG14 | 17936  | 18275  | 2.73 | 2.69E-04 | transcription_start_site | + | 22711  | 22711  | -4605 | 2703 | AN0872 |
| 1171 | CONTIG14 | 32642  | 32986  | 1.56 | 3.01E-02 | transcription_start_site | - | 29752  | 29752  | -3062 | 2707 | AN0874 |
| 1171 | CONTIG14 | 32642  | 32986  | 1.56 | 3.01E-02 | transcription_start_site | - | 29537  | 29537  | -3277 | 2708 | AN0874 |
| 1171 | CONTIG14 | 32642  | 32986  | 1.56 | 3.01E-02 | transcription_start_site | - | 29325  | 29325  | -3489 | 2709 | AN0874 |
| 1171 | CONTIG14 | 32642  | 32986  | 1.56 | 3.01E-02 | transcription_start_site | - | 28898  | 28898  | -3916 | 2710 | AN0874 |
| 1171 | CONTIG14 | 32642  | 32986  | 1.56 | 3.01E-02 | transcription_start_site | - | 28636  | 28636  | -4178 | 2711 | AN0874 |
| 1171 | CONTIG14 | 32642  | 32986  | 1.56 | 3.01E-02 | transcription_start_site | - | 27981  | 27981  | -4833 | 2712 | AN0874 |
| 1171 | CONTIG14 | 32642  | 32986  | 1.56 | 3.01E-02 | transcription_start_site | - | 27813  | 27813  | -5001 | 2713 | AN0874 |
| 1481 | CONTIG14 | 34063  | 35162  | 1.29 | 6.74E-02 | transcription_start_site | - | 29752  | 29752  | -4860 | 2707 | AN0874 |
| 1481 | CONTIG14 | 34063  | 35162  | 1.29 | 6.74E-02 | transcription_start_site | - | 29537  | 29537  | -5075 | 2708 | AN0874 |
| 1481 | CONTIG14 | 34063  | 35162  | 1.29 | 6.74E-02 | transcription_start_site | - | 29325  | 29325  | -5287 | 2709 | AN0874 |
| 1171 | CONTIG14 | 32642  | 32986  | 1.56 | 3.01E-02 | transcription_start_site | - | 31604  | 31604  | -1210 | 2715 | AN0875 |
| 1171 | CONTIG14 | 32642  | 32986  | 1.56 | 3.01E-02 | transcription_start_site | - | 31395  | 31395  | -1419 | 2716 | AN0875 |
| 1171 | CONTIG14 | 32642  | 32986  | 1.56 | 3.01E-02 | transcription_start_site | - | 30819  | 30819  | -1995 | 2717 | AN0875 |
| 1171 | CONTIG14 | 32642  | 32986  | 1.56 | 3.01E-02 | transcription_start_site | - | 30674  | 30674  | -2140 | 2718 | AN0875 |
| 1171 | CONTIG14 | 32642  | 32986  | 1.56 | 3.01E-02 | transcription_start_site | - | 30439  | 30439  | -2375 | 2719 | AN0875 |
| 1171 | CONTIG14 | 32642  | 32986  | 1.56 | 3.01E-02 | transcription_start_site | - | 30349  | 30349  | -2465 | 2720 | AN0875 |
| 1481 | CONTIG14 | 34063  | 35162  | 1.29 | 6.74E-02 | transcription_start_site | - | 31604  | 31604  | -3008 | 2715 | AN0875 |
| 1481 | CONTIG14 | 34063  | 35162  | 1.29 | 6.74E-02 | transcription_start_site | - | 31395  | 31395  | -3217 | 2716 | AN0875 |
| 1481 | CONTIG14 | 34063  | 35162  | 1.29 | 6.74E-02 | transcription_start_site | - | 30819  | 30819  | -3793 | 2717 | AN0875 |
| 1481 | CONTIG14 | 34063  | 35162  | 1.29 | 6.74E-02 | transcription_start_site | - | 30674  | 30674  | -3938 | 2718 | AN0875 |
| 1481 | CONTIG14 | 34063  | 35162  | 1.29 | 6.74E-02 | transcription_start_site | - | 30439  | 30439  | -4173 | 2719 | AN0875 |
| 1481 | CONTIG14 | 34063  | 35162  | 1.29 | 6.74E-02 | transcription_start_site | - | 30349  | 30349  | -4263 | 2720 | AN0875 |
| 1171 | CONTIG14 | 32642  | 32986  | 1.56 | 3.01E-02 | transcription_start_site | + | 32812  | 32812  | 2     | 2721 | AN0876 |

|      |          |        |        |      |          |                          |   |        |        |       |      |        |
|------|----------|--------|--------|------|----------|--------------------------|---|--------|--------|-------|------|--------|
| 1171 | CONTIG14 | 32642  | 32986  | 1.56 | 3.01E-02 | transcription_start_site | + | 32926  | 32926  | -112  | 2722 | AN0876 |
| 455  | CONTIG14 | 59028  | 59473  | 2.38 | 1.62E-03 | transcription_start_site | - | 55541  | 55541  | -3709 | 2737 | AN0884 |
| 455  | CONTIG14 | 59028  | 59473  | 2.38 | 1.62E-03 | transcription_start_site | - | 55125  | 55125  | -4125 | 2738 | AN0884 |
| 2124 | CONTIG14 | 59778  | 60965  | 0.86 | 1.41E-01 | transcription_start_site | - | 55541  | 55541  | -4830 | 2737 | AN0884 |
| 2124 | CONTIG14 | 59778  | 60965  | 0.86 | 1.41E-01 | transcription_start_site | - | 55125  | 55125  | -5246 | 2738 | AN0884 |
| 455  | CONTIG14 | 59028  | 59473  | 2.38 | 1.62E-03 | transcription_start_site | - | 58771  | 58771  | -479  | 2739 | AN0885 |
| 455  | CONTIG14 | 59028  | 59473  | 2.38 | 1.62E-03 | transcription_start_site | - | 56190  | 56190  | -3060 | 2740 | AN0885 |
| 1595 | CONTIG14 | 60988  | 61257  | 1.21 | 8.63E-02 | transcription_start_site | - | 58771  | 58771  | -2351 | 2739 | AN0885 |
| 1595 | CONTIG14 | 60988  | 61257  | 1.21 | 8.63E-02 | transcription_start_site | - | 56190  | 56190  | -4932 | 2740 | AN0885 |
| 2124 | CONTIG14 | 59778  | 60965  | 0.86 | 1.41E-01 | transcription_start_site | - | 58771  | 58771  | -1600 | 2739 | AN0885 |
| 2124 | CONTIG14 | 59778  | 60965  | 0.86 | 1.41E-01 | transcription_start_site | - | 56190  | 56190  | -4181 | 2740 | AN0885 |
| 1595 | CONTIG14 | 60988  | 61257  | 1.21 | 8.63E-02 | transcription_start_site | - | 60954  | 60954  | -168  | 2741 | AN0886 |
| 1595 | CONTIG14 | 60988  | 61257  | 1.21 | 8.63E-02 | transcription_start_site | - | 60813  | 60813  | -309  | 2742 | AN0886 |
| 2124 | CONTIG14 | 59778  | 60965  | 0.86 | 1.41E-01 | transcription_start_site | - | 60813  | 60813  | 441   | 2742 | AN0886 |
| 2124 | CONTIG14 | 59778  | 60965  | 0.86 | 1.41E-01 | transcription_start_site | - | 60954  | 60954  | 582   | 2741 | AN0886 |
| 455  | CONTIG14 | 59028  | 59473  | 2.38 | 1.62E-03 | transcription_start_site | + | 61373  | 61373  | -2122 | 2743 | AN0887 |
| 455  | CONTIG14 | 59028  | 59473  | 2.38 | 1.62E-03 | transcription_start_site | + | 61490  | 61490  | -2239 | 2744 | AN0887 |
| 455  | CONTIG14 | 59028  | 59473  | 2.38 | 1.62E-03 | transcription_start_site | + | 61662  | 61662  | -2411 | 2745 | AN0887 |
| 455  | CONTIG14 | 59028  | 59473  | 2.38 | 1.62E-03 | transcription_start_site | + | 61986  | 61986  | -2735 | 2746 | AN0887 |
| 455  | CONTIG14 | 59028  | 59473  | 2.38 | 1.62E-03 | transcription_start_site | + | 62759  | 62759  | -3508 | 2747 | AN0887 |
| 455  | CONTIG14 | 59028  | 59473  | 2.38 | 1.62E-03 | transcription_start_site | + | 64110  | 64110  | -4859 | 2748 | AN0887 |
| 455  | CONTIG14 | 59028  | 59473  | 2.38 | 1.62E-03 | transcription_start_site | + | 64306  | 64306  | -5055 | 2749 | AN0887 |
| 1595 | CONTIG14 | 60988  | 61257  | 1.21 | 8.63E-02 | transcription_start_site | + | 61373  | 61373  | -250  | 2743 | AN0887 |
| 1595 | CONTIG14 | 60988  | 61257  | 1.21 | 8.63E-02 | transcription_start_site | + | 61490  | 61490  | -367  | 2744 | AN0887 |
| 1595 | CONTIG14 | 60988  | 61257  | 1.21 | 8.63E-02 | transcription_start_site | + | 61662  | 61662  | -539  | 2745 | AN0887 |
| 1595 | CONTIG14 | 60988  | 61257  | 1.21 | 8.63E-02 | transcription_start_site | + | 61986  | 61986  | -863  | 2746 | AN0887 |
| 1595 | CONTIG14 | 60988  | 61257  | 1.21 | 8.63E-02 | transcription_start_site | + | 62759  | 62759  | -1636 | 2747 | AN0887 |
| 1595 | CONTIG14 | 60988  | 61257  | 1.21 | 8.63E-02 | transcription_start_site | + | 64110  | 64110  | -2987 | 2748 | AN0887 |
| 1595 | CONTIG14 | 60988  | 61257  | 1.21 | 8.63E-02 | transcription_start_site | + | 64306  | 64306  | -3183 | 2749 | AN0887 |
| 1595 | CONTIG14 | 60988  | 61257  | 1.21 | 8.63E-02 | transcription_start_site | + | 65215  | 65215  | -4092 | 2750 | AN0887 |
| 2124 | CONTIG14 | 59778  | 60965  | 0.86 | 1.41E-01 | transcription_start_site | + | 61373  | 61373  | -1001 | 2743 | AN0887 |
| 2124 | CONTIG14 | 59778  | 60965  | 0.86 | 1.41E-01 | transcription_start_site | + | 61490  | 61490  | -1118 | 2744 | AN0887 |
| 2124 | CONTIG14 | 59778  | 60965  | 0.86 | 1.41E-01 | transcription_start_site | + | 61662  | 61662  | -1290 | 2745 | AN0887 |
| 2124 | CONTIG14 | 59778  | 60965  | 0.86 | 1.41E-01 | transcription_start_site | + | 61986  | 61986  | -1614 | 2746 | AN0887 |
| 2124 | CONTIG14 | 59778  | 60965  | 0.86 | 1.41E-01 | transcription_start_site | + | 62759  | 62759  | -2387 | 2747 | AN0887 |
| 2124 | CONTIG14 | 59778  | 60965  | 0.86 | 1.41E-01 | transcription_start_site | + | 64110  | 64110  | -3738 | 2748 | AN0887 |
| 2124 | CONTIG14 | 59778  | 60965  | 0.86 | 1.41E-01 | transcription_start_site | + | 64306  | 64306  | -3934 | 2749 | AN0887 |
| 2124 | CONTIG14 | 59778  | 60965  | 0.86 | 1.41E-01 | transcription_start_site | + | 65215  | 65215  | -4843 | 2750 | AN0887 |
| 350  | CONTIG14 | 72755  | 73029  | 2.54 | 7.06E-04 | transcription_start_site | - | 69320  | 69320  | -3572 | 2752 | AN0889 |
| 1475 | CONTIG14 | 76595  | 77014  | 1.29 | 3.61E-02 | transcription_start_site | + | 79063  | 79063  | -2258 | 2753 | AN0890 |
| 1475 | CONTIG14 | 76595  | 77014  | 1.29 | 3.61E-02 | transcription_start_site | + | 79307  | 79307  | -2502 | 2754 | AN0890 |
| 1475 | CONTIG14 | 76595  | 77014  | 1.29 | 3.61E-02 | transcription_start_site | + | 80302  | 80302  | -3497 | 2755 | AN0890 |
| 1893 | CONTIG14 | 90379  | 90739  | 1.01 | 9.90E-02 | transcription_start_site | + | 90862  | 90862  | -303  | 2762 | AN0893 |
| 1893 | CONTIG14 | 90379  | 90739  | 1.01 | 9.90E-02 | transcription_start_site | + | 90966  | 90966  | -407  | 2763 | AN0893 |
| 1893 | CONTIG14 | 90379  | 90739  | 1.01 | 9.90E-02 | transcription_start_site | + | 91106  | 91106  | -547  | 2764 | AN0893 |
| 1077 | CONTIG14 | 95942  | 96285  | 1.64 | 2.29E-02 | transcription_start_site | - | 95146  | 95146  | -967  | 2765 | AN0894 |
| 1077 | CONTIG14 | 95942  | 96285  | 1.64 | 2.29E-02 | transcription_start_site | - | 94719  | 94719  | -1394 | 2766 | AN0894 |
| 1077 | CONTIG14 | 95942  | 96285  | 1.64 | 2.29E-02 | transcription_start_site | - | 93884  | 93884  | -2229 | 2767 | AN0894 |
| 1077 | CONTIG14 | 95942  | 96285  | 1.64 | 2.29E-02 | transcription_start_site | + | 96281  | 96281  | -167  | 2768 | AN0895 |
| 1077 | CONTIG14 | 95942  | 96285  | 1.64 | 2.29E-02 | transcription_start_site | + | 97761  | 97761  | -1647 | 2769 | AN0896 |
| 1077 | CONTIG14 | 95942  | 96285  | 1.64 | 2.29E-02 | transcription_start_site | + | 97999  | 97999  | -1885 | 2770 | AN0896 |
| 1077 | CONTIG14 | 95942  | 96285  | 1.64 | 2.29E-02 | transcription_start_site | + | 98099  | 98099  | -1985 | 2771 | AN0896 |
| 1077 | CONTIG14 | 95942  | 96285  | 1.64 | 2.29E-02 | transcription_start_site | + | 98223  | 98223  | -2109 | 2772 | AN0896 |
| 1077 | CONTIG14 | 95942  | 96285  | 1.64 | 2.29E-02 | transcription_start_site | + | 98396  | 98396  | -2282 | 2773 | AN0896 |
| 718  | CONTIG14 | 112883 | 113152 | 2.03 | 7.08E-03 | transcription_start_site | + | 113272 | 113272 | -254  | 2789 | AN0902 |
| 718  | CONTIG14 | 112883 | 113152 | 2.03 | 7.08E-03 | transcription_start_site | + | 114132 | 114132 | -1114 | 2790 | AN0902 |
| 718  | CONTIG14 | 112883 | 113152 | 2.03 | 7.08E-03 | transcription_start_site | + | 114323 | 114323 | -1305 | 2791 | AN0902 |

|      |          |        |        |      |          |                          |   |        |        |       |      |        |
|------|----------|--------|--------|------|----------|--------------------------|---|--------|--------|-------|------|--------|
| 718  | CONTIG14 | 112883 | 113152 | 2.03 | 7.08E-03 | transcription_start_site | + | 115983 | 115983 | -2965 | 2792 | AN0903 |
| 2074 | CONTIG14 | 124213 | 124567 | 0.9  | 1.57E-01 | transcription_start_site | + | 123321 | 123321 | 1069  | 2800 | AN0905 |
| 2074 | CONTIG14 | 124213 | 124567 | 0.9  | 1.57E-01 | transcription_start_site | + | 124816 | 124816 | -426  | 2801 | AN0906 |
| 2074 | CONTIG14 | 124213 | 124567 | 0.9  | 1.57E-01 | transcription_start_site | + | 124940 | 124940 | -550  | 2802 | AN0906 |
| 2074 | CONTIG14 | 124213 | 124567 | 0.9  | 1.57E-01 | transcription_start_site | + | 125097 | 125097 | -707  | 2803 | AN0906 |
| 2074 | CONTIG14 | 124213 | 124567 | 0.9  | 1.57E-01 | transcription_start_site | + | 125957 | 125957 | -1567 | 2804 | AN0906 |
| 2074 | CONTIG14 | 124213 | 124567 | 0.9  | 1.57E-01 | transcription_start_site | + | 126636 | 126636 | -2246 | 2805 | AN0906 |
| 2074 | CONTIG14 | 124213 | 124567 | 0.9  | 1.57E-01 | transcription_start_site | + | 126901 | 126901 | -2511 | 2806 | AN0906 |
| 2074 | CONTIG14 | 124213 | 124567 | 0.9  | 1.57E-01 | transcription_start_site | + | 127284 | 127284 | -2894 | 2807 | AN0906 |
| 2074 | CONTIG14 | 124213 | 124567 | 0.9  | 1.57E-01 | transcription_start_site | + | 127573 | 127573 | -3183 | 2808 | AN0906 |
| 2074 | CONTIG14 | 124213 | 124567 | 0.9  | 1.57E-01 | transcription_start_site | + | 129131 | 129131 | -4741 | 2809 | AN0907 |
| 2074 | CONTIG14 | 124213 | 124567 | 0.9  | 1.57E-01 | transcription_start_site | + | 129535 | 129535 | -5145 | 2810 | AN0907 |
| 1476 | CONTIG14 | 157281 | 157640 | 1.29 | 3.61E-02 | transcription_start_site | - | 154805 | 154805 | -2655 | 2834 | AN0917 |
| 1476 | CONTIG14 | 157281 | 157640 | 1.29 | 3.61E-02 | transcription_start_site | - | 154103 | 154103 | -3357 | 2835 | AN0917 |
| 1476 | CONTIG14 | 157281 | 157640 | 1.29 | 3.61E-02 | transcription_start_site | - | 153735 | 153735 | -3725 | 2836 | AN0917 |
| 1476 | CONTIG14 | 157281 | 157640 | 1.29 | 3.61E-02 | transcription_start_site | - | 153201 | 153201 | -4259 | 2837 | AN0917 |
| 1476 | CONTIG14 | 157281 | 157640 | 1.29 | 3.61E-02 | transcription_start_site | - | 156800 | 156800 | -660  | 2838 | AN0918 |
| 1476 | CONTIG14 | 157281 | 157640 | 1.29 | 3.61E-02 | transcription_start_site | - | 156043 | 156043 | -1417 | 2839 | AN0918 |
| 1476 | CONTIG14 | 157281 | 157640 | 1.29 | 3.61E-02 | transcription_start_site | - | 155738 | 155738 | -1722 | 2840 | AN0918 |
| 1476 | CONTIG14 | 157281 | 157640 | 1.29 | 3.61E-02 | transcription_start_site | + | 158264 | 158264 | -803  | 2841 | AN0919 |
| 1476 | CONTIG14 | 157281 | 157640 | 1.29 | 3.61E-02 | transcription_start_site | + | 161013 | 161013 | -3552 | 2842 | AN0920 |
| 1476 | CONTIG14 | 157281 | 157640 | 1.29 | 3.61E-02 | transcription_start_site | + | 161951 | 161951 | -4490 | 2843 | AN0920 |
| 25   | CONTIG14 | 186987 | 187251 | 3.4  | 0.00E+00 | transcription_start_site | - | 183035 | 183035 | -4084 | 2865 | AN0927 |
| 25   | CONTIG14 | 186987 | 187251 | 3.4  | 0.00E+00 | transcription_start_site | - | 182889 | 182889 | -4230 | 2866 | AN0927 |
| 25   | CONTIG14 | 186987 | 187251 | 3.4  | 0.00E+00 | transcription_start_site | - | 182743 | 182743 | -4376 | 2867 | AN0927 |
| 25   | CONTIG14 | 186987 | 187251 | 3.4  | 0.00E+00 | transcription_start_site | - | 182590 | 182590 | -4529 | 2868 | AN0927 |
| 243  | CONTIG14 | 183387 | 183662 | 2.73 | 2.69E-04 | transcription_start_site | - | 183035 | 183035 | -489  | 2865 | AN0927 |
| 243  | CONTIG14 | 183387 | 183662 | 2.73 | 2.69E-04 | transcription_start_site | - | 182889 | 182889 | -635  | 2866 | AN0927 |
| 243  | CONTIG14 | 183387 | 183662 | 2.73 | 2.69E-04 | transcription_start_site | - | 182743 | 182743 | -781  | 2867 | AN0927 |
| 243  | CONTIG14 | 183387 | 183662 | 2.73 | 2.69E-04 | transcription_start_site | - | 182590 | 182590 | -934  | 2868 | AN0927 |
| 25   | CONTIG14 | 186987 | 187251 | 3.4  | 0.00E+00 | transcription_start_site | - | 185947 | 185947 | -1172 | 2869 | AN0928 |
| 25   | CONTIG14 | 186987 | 187251 | 3.4  | 0.00E+00 | transcription_start_site | - | 185788 | 185788 | -1331 | 2870 | AN0928 |
| 25   | CONTIG14 | 186987 | 187251 | 3.4  | 0.00E+00 | transcription_start_site | - | 185436 | 185436 | -1683 | 2871 | AN0928 |
| 1897 | CONTIG14 | 189996 | 190476 | 1.01 | 1.54E-01 | transcription_start_site | - | 185947 | 185947 | -4289 | 2869 | AN0928 |
| 1897 | CONTIG14 | 189996 | 190476 | 1.01 | 1.54E-01 | transcription_start_site | - | 185788 | 185788 | -4448 | 2870 | AN0928 |
| 1897 | CONTIG14 | 189996 | 190476 | 1.01 | 1.54E-01 | transcription_start_site | - | 185436 | 185436 | -4800 | 2871 | AN0928 |
| 541  | CONTIG14 | 199366 | 200225 | 2.26 | 2.61E-03 | transcription_start_site | - | 195323 | 195323 | -4472 | 2872 | AN0929 |
| 541  | CONTIG14 | 199366 | 200225 | 2.26 | 2.61E-03 | transcription_start_site | - | 195048 | 195048 | -4747 | 2873 | AN0929 |
| 323  | CONTIG14 | 200401 | 200770 | 2.58 | 3.81E-04 | transcription_start_site | - | 198848 | 198848 | -1737 | 2877 | AN0930 |
| 323  | CONTIG14 | 200401 | 200770 | 2.58 | 3.81E-04 | transcription_start_site | - | 198497 | 198497 | -2088 | 2878 | AN0930 |
| 323  | CONTIG14 | 200401 | 200770 | 2.58 | 3.81E-04 | transcription_start_site | - | 198273 | 198273 | -2312 | 2879 | AN0930 |
| 323  | CONTIG14 | 200401 | 200770 | 2.58 | 3.81E-04 | transcription_start_site | - | 196988 | 196988 | -3597 | 2880 | AN0930 |
| 541  | CONTIG14 | 199366 | 200225 | 2.26 | 2.61E-03 | transcription_start_site | - | 198848 | 198848 | -947  | 2877 | AN0930 |
| 541  | CONTIG14 | 199366 | 200225 | 2.26 | 2.61E-03 | transcription_start_site | - | 198497 | 198497 | -1298 | 2878 | AN0930 |
| 541  | CONTIG14 | 199366 | 200225 | 2.26 | 2.61E-03 | transcription_start_site | - | 198273 | 198273 | -1522 | 2879 | AN0930 |
| 541  | CONTIG14 | 199366 | 200225 | 2.26 | 2.61E-03 | transcription_start_site | - | 196988 | 196988 | -2807 | 2880 | AN0930 |
| 323  | CONTIG14 | 200401 | 200770 | 2.58 | 3.81E-04 | transcription_start_site | + | 201478 | 201478 | -892  | 2881 | AN0931 |
| 323  | CONTIG14 | 200401 | 200770 | 2.58 | 3.81E-04 | transcription_start_site | + | 203074 | 203074 | -2488 | 2882 | AN0931 |
| 541  | CONTIG14 | 199366 | 200225 | 2.26 | 2.61E-03 | transcription_start_site | + | 201478 | 201478 | -1682 | 2881 | AN0931 |
| 541  | CONTIG14 | 199366 | 200225 | 2.26 | 2.61E-03 | transcription_start_site | + | 203074 | 203074 | -3278 | 2882 | AN0931 |
| 323  | CONTIG14 | 200401 | 200770 | 2.58 | 3.81E-04 | transcription_start_site | + | 204241 | 204241 | -3655 | 2883 | AN0932 |
| 323  | CONTIG14 | 200401 | 200770 | 2.58 | 3.81E-04 | transcription_start_site | + | 204704 | 204704 | -4118 | 2884 | AN0932 |
| 323  | CONTIG14 | 200401 | 200770 | 2.58 | 3.81E-04 | transcription_start_site | + | 205601 | 205601 | -5015 | 2885 | AN0932 |
| 541  | CONTIG14 | 199366 | 200225 | 2.26 | 2.61E-03 | transcription_start_site | + | 204241 | 204241 | -4445 | 2883 | AN0932 |
| 541  | CONTIG14 | 199366 | 200225 | 2.26 | 2.61E-03 | transcription_start_site | + | 204704 | 204704 | -4908 | 2884 | AN0932 |
| 456  | CONTIG14 | 208282 | 208636 | 2.38 | 1.62E-03 | transcription_start_site | + | 209299 | 209299 | -840  | 2886 | AN0933 |
| 456  | CONTIG14 | 208282 | 208636 | 2.38 | 1.62E-03 | transcription_start_site | + | 209447 | 209447 | -988  | 2887 | AN0933 |

|      |          |        |        |      |          |                          |   |        |        |       |      |        |
|------|----------|--------|--------|------|----------|--------------------------|---|--------|--------|-------|------|--------|
| 456  | CONTIG14 | 208282 | 208636 | 2.38 | 1.62E-03 | transcription_start_site | + | 209846 | 209846 | -1387 | 2888 | AN0933 |
| 1716 | CONTIG14 | 206642 | 207213 | 1.13 | 1.08E-01 | transcription_start_site | + | 209299 | 209299 | -2371 | 2886 | AN0933 |
| 1716 | CONTIG14 | 206642 | 207213 | 1.13 | 1.08E-01 | transcription_start_site | + | 209447 | 209447 | -2519 | 2887 | AN0933 |
| 1716 | CONTIG14 | 206642 | 207213 | 1.13 | 1.08E-01 | transcription_start_site | + | 209846 | 209846 | -2918 | 2888 | AN0933 |
| 2014 | CONTIG14 | 230942 | 231451 | 0.94 | 1.97E-01 | transcription_start_site | - | 227904 | 227904 | -3292 | 2910 | AN0941 |
| 2014 | CONTIG14 | 230942 | 231451 | 0.94 | 1.97E-01 | transcription_start_site | - | 227644 | 227644 | -3552 | 2911 | AN0941 |
| 2014 | CONTIG14 | 230942 | 231451 | 0.94 | 1.97E-01 | transcription_start_site | - | 226963 | 226963 | -4233 | 2912 | AN0941 |
| 2014 | CONTIG14 | 230942 | 231451 | 0.94 | 1.97E-01 | transcription_start_site | - | 226534 | 226534 | -4662 | 2913 | AN0941 |
| 2014 | CONTIG14 | 230942 | 231451 | 0.94 | 1.97E-01 | transcription_start_site | - | 226023 | 226023 | -5173 | 2914 | AN0941 |
| 2014 | CONTIG14 | 230942 | 231451 | 0.94 | 1.97E-01 | transcription_start_site | - | 230392 | 230392 | -804  | 2916 | AN0942 |
| 2014 | CONTIG14 | 230942 | 231451 | 0.94 | 1.97E-01 | transcription_start_site | - | 230154 | 230154 | -1042 | 2917 | AN0942 |
| 2014 | CONTIG14 | 230942 | 231451 | 0.94 | 1.97E-01 | transcription_start_site | + | 232906 | 232906 | -1709 | 2918 | AN0943 |
| 2014 | CONTIG14 | 230942 | 231451 | 0.94 | 1.97E-01 | transcription_start_site | + | 233346 | 233346 | -2149 | 2919 | AN0943 |
| 2014 | CONTIG14 | 230942 | 231451 | 0.94 | 1.97E-01 | transcription_start_site | + | 233494 | 233494 | -2297 | 2920 | AN0943 |
| 2014 | CONTIG14 | 230942 | 231451 | 0.94 | 1.97E-01 | transcription_start_site | + | 234251 | 234251 | -3054 | 2921 | AN0944 |
| 1717 | CONTIG14 | 248489 | 248838 | 1.13 | 1.08E-01 | transcription_start_site | - | 248222 | 248222 | -441  | 2923 | AN0947 |
| 1717 | CONTIG14 | 248489 | 248838 | 1.13 | 1.08E-01 | transcription_start_site | - | 246682 | 246682 | -1981 | 2924 | AN0947 |
| 1074 | CONTIG14 | 254943 | 255807 | 1.64 | 1.06E-02 | transcription_start_site | - | 252327 | 252327 | -3048 | 2925 | AN0948 |
| 1074 | CONTIG14 | 254943 | 255807 | 1.64 | 1.06E-02 | transcription_start_site | - | 252208 | 252208 | -3167 | 2926 | AN0948 |
| 1074 | CONTIG14 | 254943 | 255807 | 1.64 | 1.06E-02 | transcription_start_site | - | 251967 | 251967 | -3408 | 2927 | AN0948 |
| 1074 | CONTIG14 | 254943 | 255807 | 1.64 | 1.06E-02 | transcription_start_site | - | 251709 | 251709 | -3666 | 2928 | AN0948 |
| 1074 | CONTIG14 | 254943 | 255807 | 1.64 | 1.06E-02 | transcription_start_site | - | 251468 | 251468 | -3907 | 2929 | AN0948 |
| 1074 | CONTIG14 | 254943 | 255807 | 1.64 | 1.06E-02 | transcription_start_site | - | 251317 | 251317 | -4058 | 2930 | AN0948 |
| 1074 | CONTIG14 | 254943 | 255807 | 1.64 | 1.06E-02 | transcription_start_site | - | 250168 | 250168 | -5207 | 2931 | AN0948 |
| 1717 | CONTIG14 | 248489 | 248838 | 1.13 | 1.08E-01 | transcription_start_site | + | 253643 | 253643 | -4979 | 2932 | AN0949 |
| 1074 | CONTIG14 | 254943 | 255807 | 1.64 | 1.06E-02 | transcription_start_site | + | 255330 | 255330 | 45    | 2933 | AN0950 |
| 1074 | CONTIG14 | 254943 | 255807 | 1.64 | 1.06E-02 | transcription_start_site | + | 255733 | 255733 | -358  | 2934 | AN0950 |
| 684  | CONTIG14 | 261244 | 261878 | 2.07 | 6.24E-03 | transcription_start_site | + | 263249 | 263249 | -1688 | 2935 | AN0951 |
| 684  | CONTIG14 | 261244 | 261878 | 2.07 | 6.24E-03 | transcription_start_site | + | 264320 | 264320 | -2759 | 2936 | AN0951 |
| 684  | CONTIG14 | 261244 | 261878 | 2.07 | 6.24E-03 | transcription_start_site | + | 266005 | 266005 | -4444 | 2937 | AN0951 |
| 1327 | CONTIG14 | 262144 | 263013 | 1.41 | 1.95E-03 | transcription_start_site | + | 263249 | 263249 | -670  | 2935 | AN0951 |
| 1327 | CONTIG14 | 262144 | 263013 | 1.41 | 1.95E-03 | transcription_start_site | + | 264320 | 264320 | -1741 | 2936 | AN0951 |
| 1327 | CONTIG14 | 262144 | 263013 | 1.41 | 1.95E-03 | transcription_start_site | + | 266005 | 266005 | -3426 | 2937 | AN0951 |
| 866  | CONTIG14 | 312016 | 312365 | 1.87 | 1.06E-02 | transcription_start_site | - | 309781 | 309781 | -2409 | 2978 | AN0973 |
| 866  | CONTIG14 | 312016 | 312365 | 1.87 | 1.06E-02 | transcription_start_site | - | 310920 | 310920 | -1270 | 2979 | AN0974 |
| 289  | CONTIG14 | 330620 | 331272 | 2.65 | 0.00E+00 | transcription_start_site | - | 325686 | 325686 | -5260 | 2984 | AN0977 |
| 289  | CONTIG14 | 330620 | 331272 | 2.65 | 0.00E+00 | transcription_start_site | + | 333510 | 333510 | -2564 | 2988 | AN0979 |
| 289  | CONTIG14 | 330620 | 331272 | 2.65 | 0.00E+00 | transcription_start_site | + | 334531 | 334531 | -3585 | 2989 | AN0979 |
| 289  | CONTIG14 | 330620 | 331272 | 2.65 | 0.00E+00 | transcription_start_site | + | 335423 | 335423 | -4477 | 2990 | AN0979 |
| 289  | CONTIG14 | 330620 | 331272 | 2.65 | 0.00E+00 | transcription_start_site | + | 335837 | 335837 | -4891 | 2991 | AN0979 |
| 626  | CONTIG14 | 344115 | 344465 | 2.15 | 4.57E-03 | transcription_start_site | - | 340928 | 340928 | -3362 | 2992 | AN0980 |
| 626  | CONTIG14 | 344115 | 344465 | 2.15 | 4.57E-03 | transcription_start_site | - | 339995 | 339995 | -4295 | 2993 | AN0980 |
| 626  | CONTIG14 | 344115 | 344465 | 2.15 | 4.57E-03 | transcription_start_site | - | 343707 | 343707 | -583  | 2999 | AN0981 |
| 626  | CONTIG14 | 344115 | 344465 | 2.15 | 4.57E-03 | transcription_start_site | - | 342865 | 342865 | -1425 | 3000 | AN0981 |
| 626  | CONTIG14 | 344115 | 344465 | 2.15 | 4.57E-03 | transcription_start_site | + | 347524 | 347524 | -3234 | 3003 | AN0983 |
| 1337 | CONTIG14 | 354753 | 355037 | 1.41 | 4.78E-02 | transcription_start_site | - | 350997 | 350997 | -3898 | 3004 | AN0984 |
| 1337 | CONTIG14 | 354753 | 355037 | 1.41 | 4.78E-02 | transcription_start_site | - | 350736 | 350736 | -4159 | 3005 | AN0984 |
| 1337 | CONTIG14 | 354753 | 355037 | 1.41 | 4.78E-02 | transcription_start_site | - | 353039 | 353039 | -1856 | 3006 | AN0985 |
| 1337 | CONTIG14 | 354753 | 355037 | 1.41 | 4.78E-02 | transcription_start_site | - | 352518 | 352518 | -2377 | 3007 | AN0985 |
| 1337 | CONTIG14 | 354753 | 355037 | 1.41 | 4.78E-02 | transcription_start_site | - | 352345 | 352345 | -2550 | 3008 | AN0985 |
| 1337 | CONTIG14 | 354753 | 355037 | 1.41 | 4.78E-02 | transcription_start_site | - | 351835 | 351835 | -3060 | 3009 | AN0985 |
| 1337 | CONTIG14 | 354753 | 355037 | 1.41 | 4.78E-02 | transcription_start_site | + | 355879 | 355879 | -984  | 3010 | AN0986 |
| 1337 | CONTIG14 | 354753 | 355037 | 1.41 | 4.78E-02 | transcription_start_site | + | 356090 | 356090 | -1195 | 3011 | AN0986 |
| 1337 | CONTIG14 | 354753 | 355037 | 1.41 | 4.78E-02 | transcription_start_site | + | 358172 | 358172 | -3277 | 3012 | AN0986 |
| 1337 | CONTIG14 | 354753 | 355037 | 1.41 | 4.78E-02 | transcription_start_site | + | 359006 | 359006 | -4111 | 3013 | AN0987 |
| 1305 | CONTIG15 | 9546   | 9820   | 1.43 | 1.37E-02 | transcription_start_site | - | 9483   | 9483   | -200  | 3027 | AN0991 |
| 1305 | CONTIG15 | 9546   | 9820   | 1.43 | 1.37E-02 | transcription_start_site | - | 9123   | 9123   | -560  | 3028 | AN0991 |

|      |          |        |        |      |          |                          |   |        |        |       |      |         |
|------|----------|--------|--------|------|----------|--------------------------|---|--------|--------|-------|------|---------|
| 1305 | CONTIG15 | 9546   | 9820   | 1.43 | 1.37E-02 | transcription_start_site | - | 8702   | 8702   | -981  | 3029 | AN0991  |
| 1305 | CONTIG15 | 9546   | 9820   | 1.43 | 1.37E-02 | transcription_start_site | - | 8173   | 8173   | -1510 | 3030 | AN0991  |
| 1305 | CONTIG15 | 9546   | 9820   | 1.43 | 1.37E-02 | transcription_start_site | + | 10522  | 10522  | -839  | 3031 | AN0992  |
| 1305 | CONTIG15 | 9546   | 9820   | 1.43 | 1.37E-02 | transcription_start_site | + | 10995  | 10995  | -1312 | 3032 | AN0992  |
| 1305 | CONTIG15 | 9546   | 9820   | 1.43 | 1.37E-02 | transcription_start_site | + | 12213  | 12213  | -2530 | 3033 | AN0993  |
| 1305 | CONTIG15 | 9546   | 9820   | 1.43 | 1.37E-02 | transcription_start_site | + | 12469  | 12469  | -2786 | 3034 | AN0993  |
| 1305 | CONTIG15 | 9546   | 9820   | 1.43 | 1.37E-02 | transcription_start_site | + | 12569  | 12569  | -2886 | 3035 | AN0993  |
| 1305 | CONTIG15 | 9546   | 9820   | 1.43 | 1.37E-02 | transcription_start_site | + | 12816  | 12816  | -3133 | 3036 | AN0993  |
| 1305 | CONTIG15 | 9546   | 9820   | 1.43 | 1.37E-02 | transcription_start_site | + | 13016  | 13016  | -3333 | 3037 | AN0993  |
| 1305 | CONTIG15 | 9546   | 9820   | 1.43 | 1.37E-02 | transcription_start_site | + | 13129  | 13129  | -3446 | 3038 | AN0993  |
| 1305 | CONTIG15 | 9546   | 9820   | 1.43 | 1.37E-02 | transcription_start_site | + | 13439  | 13439  | -3756 | 3039 | AN0993  |
| 2290 | CONTIG15 | 28127  | 29166  | 0.68 | 1.81E-01 | transcription_start_site | - | 26560  | 26560  | -2086 | 3047 | AN0997  |
| 2248 | CONTIG15 | 32942  | 33726  | 0.75 | 1.97E-01 | transcription_start_site | - | 28656  | 28656  | -4678 | 3048 | AN0998  |
| 2248 | CONTIG15 | 32942  | 33726  | 0.75 | 1.97E-01 | transcription_start_site | - | 28511  | 28511  | -4823 | 3049 | AN0998  |
| 2248 | CONTIG15 | 32942  | 33726  | 0.75 | 1.97E-01 | transcription_start_site | - | 28199  | 28199  | -5135 | 3050 | AN0998  |
| 2290 | CONTIG15 | 28127  | 29166  | 0.68 | 1.81E-01 | transcription_start_site | - | 28656  | 28656  | 9     | 3048 | AN0998  |
| 2290 | CONTIG15 | 28127  | 29166  | 0.68 | 1.81E-01 | transcription_start_site | - | 28511  | 28511  | -135  | 3049 | AN0998  |
| 2290 | CONTIG15 | 28127  | 29166  | 0.68 | 1.81E-01 | transcription_start_site | - | 28199  | 28199  | -447  | 3050 | AN0998  |
| 2290 | CONTIG15 | 28127  | 29166  | 0.68 | 1.81E-01 | transcription_start_site | - | 27587  | 27587  | -1059 | 3051 | AN0998  |
| 2290 | CONTIG15 | 28127  | 29166  | 0.68 | 1.81E-01 | transcription_start_site | + | 29094  | 29094  | -447  | 3052 | AN0999  |
| 2290 | CONTIG15 | 28127  | 29166  | 0.68 | 1.81E-01 | transcription_start_site | + | 29249  | 29249  | -602  | 3053 | AN0999  |
| 2290 | CONTIG15 | 28127  | 29166  | 0.68 | 1.81E-01 | transcription_start_site | + | 29557  | 29557  | -910  | 3054 | AN0999  |
| 2290 | CONTIG15 | 28127  | 29166  | 0.68 | 1.81E-01 | transcription_start_site | + | 29915  | 29915  | -1268 | 3055 | AN0999  |
| 2248 | CONTIG15 | 32942  | 33726  | 0.75 | 1.97E-01 | transcription_start_site | - | 31896  | 31896  | -1438 | 3056 | AN1000  |
| 2248 | CONTIG15 | 32942  | 33726  | 0.75 | 1.97E-01 | transcription_start_site | - | 31698  | 31698  | -1636 | 3057 | AN1000  |
| 2248 | CONTIG15 | 32942  | 33726  | 0.75 | 1.97E-01 | transcription_start_site | + | 33204  | 33204  | 130   | 3083 | AN1001  |
| 2248 | CONTIG15 | 32942  | 33726  | 0.75 | 1.97E-01 | transcription_start_site | + | 33577  | 33577  | -243  | 3084 | AN1001  |
| 2290 | CONTIG15 | 28127  | 29166  | 0.68 | 1.81E-01 | transcription_start_site | + | 33204  | 33204  | -4557 | 3083 | AN1001  |
| 2290 | CONTIG15 | 28127  | 29166  | 0.68 | 1.81E-01 | transcription_start_site | + | 33577  | 33577  | -4930 | 3084 | AN1001  |
| 1639 | CONTIG3  | 35028  | 35317  | 1.18 | 6.74E-02 | transcription_start_site | - | 32323  | 32323  | -2849 | 3085 | AN10010 |
| 1639 | CONTIG3  | 35028  | 35317  | 1.18 | 6.74E-02 | transcription_start_site | - | 32214  | 32214  | -2958 | 3086 | AN10010 |
| 261  | CONTIG3  | 19278  | 20827  | 2.69 | 0.00E+00 | transcription_start_site | + | 21825  | 21825  | -1772 | 3091 | AN10014 |
| 1065 | CONTIG4  | 63079  | 63578  | 1.65 | 7.70E-03 | transcription_start_site | - | 59182  | 59182  | -4146 | 3104 | AN10018 |
| 1065 | CONTIG4  | 63079  | 63578  | 1.65 | 7.70E-03 | transcription_start_site | - | 59052  | 59052  | -4276 | 3105 | AN10018 |
| 1065 | CONTIG4  | 63079  | 63578  | 1.65 | 7.70E-03 | transcription_start_site | - | 62720  | 62720  | -608  | 3106 | AN10019 |
| 1065 | CONTIG4  | 63079  | 63578  | 1.65 | 7.70E-03 | transcription_start_site | - | 62585  | 62585  | -743  | 3107 | AN10019 |
| 1065 | CONTIG4  | 63079  | 63578  | 1.65 | 7.70E-03 | transcription_start_site | - | 62225  | 62225  | -1103 | 3108 | AN10019 |
| 1065 | CONTIG4  | 63079  | 63578  | 1.65 | 7.70E-03 | transcription_start_site | - | 60800  | 60800  | -2528 | 3109 | AN10019 |
| 1969 | CONTIG15 | 39317  | 39586  | 0.96 | 8.63E-02 | transcription_start_site | - | 39152  | 39152  | -299  | 3110 | AN1002  |
| 1969 | CONTIG15 | 39317  | 39586  | 0.96 | 8.63E-02 | transcription_start_site | - | 36733  | 36733  | -2718 | 3111 | AN1002  |
| 517  | CONTIG5  | 2716   | 3200   | 2.29 | 4.22E-03 | transcription_start_site | - | 3747   | 3747   | 789   | 3118 | AN10021 |
| 1361 | CONTIG5  | 89946  | 90277  | 1.39 | 1.08E-01 | transcription_start_site | + | 92518  | 92518  | -2406 | 3128 | AN10025 |
| 1361 | CONTIG5  | 89946  | 90277  | 1.39 | 1.08E-01 | transcription_start_site | + | 93251  | 93251  | -3139 | 3129 | AN10025 |
| 1969 | CONTIG15 | 39317  | 39586  | 0.96 | 8.63E-02 | transcription_start_site | + | 39578  | 39578  | -126  | 3145 | AN1003  |
| 1969 | CONTIG15 | 39317  | 39586  | 0.96 | 8.63E-02 | transcription_start_site | + | 39733  | 39733  | -281  | 3146 | AN1003  |
| 1969 | CONTIG15 | 39317  | 39586  | 0.96 | 8.63E-02 | transcription_start_site | + | 39956  | 39956  | -504  | 3147 | AN1003  |
| 1969 | CONTIG15 | 39317  | 39586  | 0.96 | 8.63E-02 | transcription_start_site | + | 40101  | 40101  | -649  | 3148 | AN1003  |
| 1969 | CONTIG15 | 39317  | 39586  | 0.96 | 8.63E-02 | transcription_start_site | + | 40273  | 40273  | -821  | 3149 | AN1003  |
| 1969 | CONTIG15 | 39317  | 39586  | 0.96 | 8.63E-02 | transcription_start_site | + | 41049  | 41049  | -1597 | 3150 | AN1003  |
| 39   | CONTIG5  | 275558 | 275922 | 3.3  | 2.51E-04 | transcription_start_site | - | 276362 | 276362 | 622   | 3153 | AN10030 |
| 813  | CONTIG5  | 276378 | 277107 | 1.91 | 4.18E-03 | transcription_start_site | - | 276362 | 276362 | -380  | 3153 | AN10030 |
| 813  | CONTIG5  | 276378 | 277107 | 1.91 | 4.18E-03 | transcription_start_site | - | 277336 | 277336 | 593   | 3152 | AN10030 |
| 813  | CONTIG5  | 276378 | 277107 | 1.91 | 4.18E-03 | transcription_start_site | - | 277772 | 277772 | 1029  | 3151 | AN10030 |
| 1142 | CONTIG5  | 278038 | 278467 | 1.58 | 6.74E-02 | transcription_start_site | - | 277772 | 277772 | -480  | 3151 | AN10030 |
| 1142 | CONTIG5  | 278038 | 278467 | 1.58 | 6.74E-02 | transcription_start_site | - | 277336 | 277336 | -916  | 3152 | AN10030 |
| 1142 | CONTIG5  | 278038 | 278467 | 1.58 | 6.74E-02 | transcription_start_site | - | 276362 | 276362 | -1890 | 3153 | AN10030 |
| 11   | CONTIG5  | 397516 | 398017 | 3.53 | 0.00E+00 | transcription_start_site | - | 392771 | 392771 | -4995 | 3155 | AN10032 |



|      |          |        |        |      |          |                          |   |        |        |       |      |         |
|------|----------|--------|--------|------|----------|--------------------------|---|--------|--------|-------|------|---------|
| 11   | CONTIG5  | 397516 | 398017 | 3.53 | 0.00E+00 | transcription_start_site | - | 392569 | 392569 | -5197 | 3156 | AN10032 |
| 701  | CONTIG5  | 95479  | 95915  | 2.05 | 2.05E-02 | transcription_start_site | + | 94594  | 94594  | 1103  | 3164 | AN10033 |
| 1361 | CONTIG5  | 89946  | 90277  | 1.39 | 1.08E-01 | transcription_start_site | + | 94179  | 94179  | -4067 | 3161 | AN10033 |
| 1361 | CONTIG5  | 89946  | 90277  | 1.39 | 1.08E-01 | transcription_start_site | + | 94269  | 94269  | -4157 | 3162 | AN10033 |
| 1361 | CONTIG5  | 89946  | 90277  | 1.39 | 1.08E-01 | transcription_start_site | + | 94443  | 94443  | -4331 | 3163 | AN10033 |
| 1361 | CONTIG5  | 89946  | 90277  | 1.39 | 1.08E-01 | transcription_start_site | + | 94594  | 94594  | -4482 | 3164 | AN10033 |
| 517  | CONTIG5  | 2716   | 3200   | 2.29 | 4.22E-03 | transcription_start_site | - | 2407   | 2407   | -551  | 3176 | AN10039 |
| 39   | CONTIG5  | 275558 | 275922 | 3.3  | 2.51E-04 | transcription_start_site | - | 275377 | 275377 | -363  | 3180 | AN10040 |
| 813  | CONTIG5  | 276378 | 277107 | 1.91 | 4.18E-03 | transcription_start_site | - | 275377 | 275377 | -1365 | 3180 | AN10040 |
| 1142 | CONTIG5  | 278038 | 278467 | 1.58 | 6.74E-02 | transcription_start_site | - | 275377 | 275377 | -2875 | 3180 | AN10040 |
| 1625 | CONTIG5  | 210231 | 210577 | 1.19 | 1.15E-01 | transcription_start_site | - | 208939 | 208939 | -1465 | 3184 | AN10042 |
| 1625 | CONTIG5  | 210231 | 210577 | 1.19 | 1.15E-01 | transcription_start_site | - | 208681 | 208681 | -1723 | 3185 | AN10042 |
| 1625 | CONTIG5  | 210231 | 210577 | 1.19 | 1.15E-01 | transcription_start_site | - | 208446 | 208446 | -1958 | 3186 | AN10042 |
| 485  | CONTIG5  | 245560 | 245904 | 2.34 | 9.96E-03 | transcription_start_site | + | 247523 | 247523 | -1791 | 3192 | AN10045 |
| 1549 | CONTIG5  | 248345 | 248679 | 1.24 | 1.54E-01 | transcription_start_site | + | 247523 | 247523 | 989   | 3192 | AN10045 |
| 1969 | CONTIG15 | 39317  | 39586  | 0.96 | 8.63E-02 | transcription_start_site | + | 42684  | 42684  | -3232 | 3200 | AN1005  |
| 1969 | CONTIG15 | 39317  | 39586  | 0.96 | 8.63E-02 | transcription_start_site | + | 42857  | 42857  | -3405 | 3201 | AN1005  |
| 28   | CONTIG5  | 425342 | 425826 | 3.39 | 0.00E+00 | transcription_start_site | - | 424938 | 424938 | -646  | 3202 | AN10050 |
| 28   | CONTIG5  | 425342 | 425826 | 3.39 | 0.00E+00 | transcription_start_site | - | 424773 | 424773 | -811  | 3203 | AN10050 |
| 1144 | CONTIG5  | 428405 | 428679 | 1.58 | 6.74E-02 | transcription_start_site | - | 424938 | 424938 | -3604 | 3202 | AN10050 |
| 1144 | CONTIG5  | 428405 | 428679 | 1.58 | 6.74E-02 | transcription_start_site | - | 424773 | 424773 | -3769 | 3203 | AN10050 |
| 28   | CONTIG5  | 425342 | 425826 | 3.39 | 0.00E+00 | transcription_start_site | - | 425666 | 425666 | 82    | 3204 | AN10051 |
| 1144 | CONTIG5  | 428405 | 428679 | 1.58 | 6.74E-02 | transcription_start_site | - | 425666 | 425666 | -2876 | 3204 | AN10051 |
| 141  | CONTIG6  | 88059  | 88478  | 2.97 | 0.00E+00 | transcription_start_site | - | 87170  | 87170  | -1098 | 3208 | AN10053 |
| 141  | CONTIG6  | 88059  | 88478  | 2.97 | 0.00E+00 | transcription_start_site | - | 86552  | 86552  | -1716 | 3209 | AN10053 |
| 267  | CONTIG6  | 88579  | 89093  | 2.68 | 0.00E+00 | transcription_start_site | - | 87170  | 87170  | -1666 | 3208 | AN10053 |
| 267  | CONTIG6  | 88579  | 89093  | 2.68 | 0.00E+00 | transcription_start_site | - | 86552  | 86552  | -2284 | 3209 | AN10053 |
| 2042 | CONTIG6  | 157577 | 157926 | 0.92 | 1.76E-01 | transcription_start_site | + | 157758 | 157758 | -6    | 3210 | AN10054 |
| 2042 | CONTIG6  | 157577 | 157926 | 0.92 | 1.76E-01 | transcription_start_site | + | 157862 | 157862 | -110  | 3211 | AN10054 |
| 2042 | CONTIG6  | 157577 | 157926 | 0.92 | 1.76E-01 | transcription_start_site | + | 158333 | 158333 | -581  | 3212 | AN10054 |
| 2042 | CONTIG6  | 157577 | 157926 | 0.92 | 1.76E-01 | transcription_start_site | + | 158542 | 158542 | -790  | 3213 | AN10054 |
| 2042 | CONTIG6  | 157577 | 157926 | 0.92 | 1.76E-01 | transcription_start_site | + | 158656 | 158656 | -904  | 3214 | AN10054 |
| 2042 | CONTIG6  | 157577 | 157926 | 0.92 | 1.76E-01 | transcription_start_site | + | 158823 | 158823 | -1071 | 3215 | AN10054 |
| 2042 | CONTIG6  | 157577 | 157926 | 0.92 | 1.76E-01 | transcription_start_site | + | 159545 | 159545 | -1793 | 3216 | AN10055 |
| 2042 | CONTIG6  | 157577 | 157926 | 0.92 | 1.76E-01 | transcription_start_site | + | 159839 | 159839 | -2087 | 3217 | AN10055 |
| 1264 | CONTIG6  | 208578 | 208937 | 1.47 | 1.44E-02 | transcription_start_site | + | 212242 | 212242 | -3484 | 3225 | AN10058 |
| 1264 | CONTIG6  | 208578 | 208937 | 1.47 | 1.44E-02 | transcription_start_site | + | 212529 | 212529 | -3771 | 3226 | AN10058 |
| 1264 | CONTIG6  | 208578 | 208937 | 1.47 | 1.44E-02 | transcription_start_site | + | 213676 | 213676 | -4918 | 3227 | AN10058 |
| 2105 | CONTIG6  | 244884 | 245378 | 0.88 | 1.97E-01 | transcription_start_site | + | 246337 | 246337 | -1206 | 3228 | AN10059 |
| 2105 | CONTIG6  | 244884 | 245378 | 0.88 | 1.97E-01 | transcription_start_site | + | 247520 | 247520 | -2389 | 3229 | AN10059 |
| 2105 | CONTIG6  | 244884 | 245378 | 0.88 | 1.97E-01 | transcription_start_site | + | 248526 | 248526 | -3395 | 3230 | AN10059 |
| 1593 | CONTIG6  | 175801 | 176087 | 1.21 | 6.74E-02 | transcription_start_site | + | 176173 | 176173 | -229  | 3238 | AN10060 |
| 1593 | CONTIG6  | 175801 | 176087 | 1.21 | 6.74E-02 | transcription_start_site | + | 176440 | 176440 | -496  | 3239 | AN10060 |
| 1593 | CONTIG6  | 175801 | 176087 | 1.21 | 6.74E-02 | transcription_start_site | + | 180841 | 180841 | -4897 | 3240 | AN10060 |
| 2043 | CONTIG6  | 173551 | 173845 | 0.92 | 1.76E-01 | transcription_start_site | + | 176173 | 176173 | -2475 | 3238 | AN10060 |
| 2043 | CONTIG6  | 173551 | 173845 | 0.92 | 1.76E-01 | transcription_start_site | + | 176440 | 176440 | -2742 | 3239 | AN10060 |
| 1231 | CONTIG6  | 194946 | 195286 | 1.5  | 2.63E-02 | transcription_start_site | + | 199263 | 199263 | -4147 | 3241 | AN10061 |
| 1231 | CONTIG6  | 194946 | 195286 | 1.5  | 2.63E-02 | transcription_start_site | + | 199427 | 199427 | -4311 | 3242 | AN10061 |
| 1264 | CONTIG6  | 208578 | 208937 | 1.47 | 1.44E-02 | transcription_start_site | + | 209144 | 209144 | -386  | 3258 | AN10068 |
| 1264 | CONTIG6  | 208578 | 208937 | 1.47 | 1.44E-02 | transcription_start_site | + | 209639 | 209639 | -881  | 3259 | AN10068 |
| 1264 | CONTIG6  | 208578 | 208937 | 1.47 | 1.44E-02 | transcription_start_site | + | 209938 | 209938 | -1180 | 3260 | AN10068 |
| 2105 | CONTIG6  | 244884 | 245378 | 0.88 | 1.97E-01 | transcription_start_site | + | 249053 | 249053 | -3922 | 3261 | AN10069 |
| 2105 | CONTIG6  | 244884 | 245378 | 0.88 | 1.97E-01 | transcription_start_site | + | 249560 | 249560 | -4429 | 3262 | AN10069 |
| 2187 | CONTIG6  | 259514 | 260013 | 0.81 | 1.81E-01 | transcription_start_site | - | 259706 | 259706 | -57   | 3272 | AN10070 |
| 2187 | CONTIG6  | 259514 | 260013 | 0.81 | 1.81E-01 | transcription_start_site | - | 259825 | 259825 | 61    | 3271 | AN10070 |
| 141  | CONTIG6  | 88059  | 88478  | 2.97 | 0.00E+00 | transcription_start_site | - | 85532  | 85532  | -2736 | 3273 | AN10071 |
| 141  | CONTIG6  | 88059  | 88478  | 2.97 | 0.00E+00 | transcription_start_site | - | 84609  | 84609  | -3659 | 3274 | AN10071 |

|      |          |        |        |      |          |                          |   |        |        |       |      |         |
|------|----------|--------|--------|------|----------|--------------------------|---|--------|--------|-------|------|---------|
| 267  | CONTIG6  | 88579  | 89093  | 2.68 | 0.00E+00 | transcription_start_site | - | 85532  | 85532  | -3304 | 3273 | AN10071 |
| 267  | CONTIG6  | 88579  | 89093  | 2.68 | 0.00E+00 | transcription_start_site | - | 84609  | 84609  | -4227 | 3274 | AN10071 |
| 2042 | CONTIG6  | 157577 | 157926 | 0.92 | 1.76E-01 | transcription_start_site | + | 161003 | 161003 | -3251 | 3278 | AN10073 |
| 2042 | CONTIG6  | 157577 | 157926 | 0.92 | 1.76E-01 | transcription_start_site | + | 161266 | 161266 | -3514 | 3279 | AN10073 |
| 2187 | CONTIG6  | 259514 | 260013 | 0.81 | 1.81E-01 | transcription_start_site | + | 258615 | 258615 | 1148  | 3289 | AN10075 |
| 985  | CONTIG7  | 145284 | 145795 | 1.73 | 0.00E+00 | transcription_start_site | - | 145192 | 145192 | -347  | 3294 | AN10077 |
| 985  | CONTIG7  | 145284 | 145795 | 1.73 | 0.00E+00 | transcription_start_site | - | 145012 | 145012 | -527  | 3295 | AN10077 |
| 985  | CONTIG7  | 145284 | 145795 | 1.73 | 0.00E+00 | transcription_start_site | - | 143846 | 143846 | -1693 | 3296 | AN10077 |
| 985  | CONTIG7  | 145284 | 145795 | 1.73 | 0.00E+00 | transcription_start_site | - | 143637 | 143637 | -1902 | 3297 | AN10077 |
| 985  | CONTIG7  | 145284 | 145795 | 1.73 | 0.00E+00 | transcription_start_site | - | 143473 | 143473 | -2066 | 3298 | AN10077 |
| 985  | CONTIG7  | 145284 | 145795 | 1.73 | 0.00E+00 | transcription_start_site | + | 146985 | 146985 | -1445 | 3299 | AN10078 |
| 1388 | CONTIG7  | 166437 | 167380 | 1.36 | 3.01E-02 | transcription_start_site | - | 164667 | 164667 | -2241 | 3300 | AN10079 |
| 1388 | CONTIG7  | 166437 | 167380 | 1.36 | 3.01E-02 | transcription_start_site | - | 164555 | 164555 | -2353 | 3301 | AN10079 |
| 1388 | CONTIG7  | 166437 | 167380 | 1.36 | 3.01E-02 | transcription_start_site | - | 164380 | 164380 | -2528 | 3302 | AN10079 |
| 1388 | CONTIG7  | 166437 | 167380 | 1.36 | 3.01E-02 | transcription_start_site | - | 164302 | 164302 | -2606 | 3303 | AN10079 |
| 1388 | CONTIG7  | 166437 | 167380 | 1.36 | 3.01E-02 | transcription_start_site | - | 162180 | 162180 | -4728 | 3304 | AN10079 |
| 1388 | CONTIG7  | 166437 | 167380 | 1.36 | 3.01E-02 | transcription_start_site | - | 162063 | 162063 | -4845 | 3305 | AN10079 |
| 1107 | CONTIG7  | 229596 | 230460 | 1.6  | 4.92E-03 | transcription_start_site | + | 232619 | 232619 | -2591 | 3310 | AN10080 |
| 1107 | CONTIG7  | 229596 | 230460 | 1.6  | 4.92E-03 | transcription_start_site | + | 234062 | 234062 | -4034 | 3311 | AN10080 |
| 523  | CONTIG7  | 547506 | 547860 | 2.28 | 2.06E-04 | transcription_start_site | + | 550054 | 550054 | -2371 | 3332 | AN10086 |
| 523  | CONTIG7  | 547506 | 547860 | 2.28 | 2.06E-04 | transcription_start_site | + | 550361 | 550361 | -2678 | 3333 | AN10086 |
| 523  | CONTIG7  | 547506 | 547860 | 2.28 | 2.06E-04 | transcription_start_site | + | 551582 | 551582 | -3899 | 3334 | AN10086 |
| 985  | CONTIG7  | 145284 | 145795 | 1.73 | 0.00E+00 | transcription_start_site | - | 142160 | 142160 | -3379 | 3340 | AN10088 |
| 985  | CONTIG7  | 145284 | 145795 | 1.73 | 0.00E+00 | transcription_start_site | - | 141943 | 141943 | -3596 | 3341 | AN10088 |
| 985  | CONTIG7  | 145284 | 145795 | 1.73 | 0.00E+00 | transcription_start_site | - | 141855 | 141855 | -3684 | 3342 | AN10088 |
| 985  | CONTIG7  | 145284 | 145795 | 1.73 | 0.00E+00 | transcription_start_site | - | 141721 | 141721 | -3818 | 3343 | AN10088 |
| 985  | CONTIG7  | 145284 | 145795 | 1.73 | 0.00E+00 | transcription_start_site | - | 141372 | 141372 | -4167 | 3344 | AN10088 |
| 985  | CONTIG7  | 145284 | 145795 | 1.73 | 0.00E+00 | transcription_start_site | - | 140831 | 140831 | -4708 | 3345 | AN10088 |
| 985  | CONTIG7  | 145284 | 145795 | 1.73 | 0.00E+00 | transcription_start_site | + | 149820 | 149820 | -4280 | 3346 | AN10089 |
| 985  | CONTIG7  | 145284 | 145795 | 1.73 | 0.00E+00 | transcription_start_site | + | 150185 | 150185 | -4645 | 3347 | AN10089 |
| 985  | CONTIG7  | 145284 | 145795 | 1.73 | 0.00E+00 | transcription_start_site | + | 150520 | 150520 | -4980 | 3348 | AN10089 |
| 985  | CONTIG7  | 145284 | 145795 | 1.73 | 0.00E+00 | transcription_start_site | + | 150792 | 150792 | -5252 | 3349 | AN10089 |
| 523  | CONTIG7  | 547506 | 547860 | 2.28 | 2.06E-04 | transcription_start_site | + | 548723 | 548723 | -1040 | 3368 | AN10099 |
| 523  | CONTIG7  | 547506 | 547860 | 2.28 | 2.06E-04 | transcription_start_site | + | 549179 | 549179 | -1496 | 3369 | AN10099 |
| 1388 | CONTIG7  | 166437 | 167380 | 1.36 | 3.01E-02 | transcription_start_site | - | 166660 | 166660 | -248  | 3380 | AN10103 |
| 1388 | CONTIG7  | 166437 | 167380 | 1.36 | 3.01E-02 | transcription_start_site | - | 166186 | 166186 | -722  | 3381 | AN10103 |
| 1388 | CONTIG7  | 166437 | 167380 | 1.36 | 3.01E-02 | transcription_start_site | - | 165748 | 165748 | -1160 | 3382 | AN10103 |
| 936  | CONTIG8  | 27153  | 27593  | 1.79 | 2.66E-02 | transcription_start_site | - | 28470  | 28470  | 1097  | 3394 | AN10107 |
| 1648 | CONTIG8  | 28653  | 29314  | 1.18 | 1.57E-01 | transcription_start_site | - | 28470  | 28470  | -513  | 3394 | AN10107 |
| 1817 | CONTIG10 | 88276  | 88783  | 1.06 | 9.90E-02 | transcription_start_site | - | 88347  | 88347  | -182  | 3395 | AN10108 |
| 1374 | CONTIG15 | 64965  | 65379  | 1.37 | 1.80E-02 | transcription_start_site | - | 61066  | 61066  | -4106 | 3399 | AN1011  |
| 1374 | CONTIG15 | 64965  | 65379  | 1.37 | 1.80E-02 | transcription_start_site | - | 60915  | 60915  | -4257 | 3400 | AN1011  |
| 1374 | CONTIG15 | 64965  | 65379  | 1.37 | 1.80E-02 | transcription_start_site | - | 60608  | 60608  | -4564 | 3401 | AN1011  |
| 1374 | CONTIG15 | 64965  | 65379  | 1.37 | 1.80E-02 | transcription_start_site | - | 60387  | 60387  | -4785 | 3402 | AN1011  |
| 1374 | CONTIG15 | 64965  | 65379  | 1.37 | 1.80E-02 | transcription_start_site | - | 60271  | 60271  | -4901 | 3403 | AN1011  |
| 1817 | CONTIG10 | 88276  | 88783  | 1.06 | 9.90E-02 | transcription_start_site | - | 87290  | 87290  | -1239 | 3405 | AN10111 |
| 1032 | CONTIG11 | 50344  | 50603  | 1.69 | 4.78E-02 | transcription_start_site | + | 54152  | 54152  | -3678 | 3412 | AN10115 |
| 1032 | CONTIG11 | 50344  | 50603  | 1.69 | 4.78E-02 | transcription_start_site | + | 55064  | 55064  | -4590 | 3413 | AN10115 |
| 1032 | CONTIG11 | 50344  | 50603  | 1.69 | 4.78E-02 | transcription_start_site | + | 55294  | 55294  | -4820 | 3414 | AN10115 |
| 1032 | CONTIG11 | 50344  | 50603  | 1.69 | 4.78E-02 | transcription_start_site | + | 51163  | 51163  | -689  | 3416 | AN10116 |
| 1032 | CONTIG11 | 50344  | 50603  | 1.69 | 4.78E-02 | transcription_start_site | + | 51357  | 51357  | -883  | 3417 | AN10116 |
| 1032 | CONTIG11 | 50344  | 50603  | 1.69 | 4.78E-02 | transcription_start_site | + | 51535  | 51535  | -1061 | 3418 | AN10116 |
| 1338 | CONTIG11 | 46577  | 47011  | 1.41 | 9.60E-02 | transcription_start_site | + | 51163  | 51163  | -4369 | 3416 | AN10116 |
| 1338 | CONTIG11 | 46577  | 47011  | 1.41 | 9.60E-02 | transcription_start_site | + | 51357  | 51357  | -4563 | 3417 | AN10116 |
| 1338 | CONTIG11 | 46577  | 47011  | 1.41 | 9.60E-02 | transcription_start_site | + | 51535  | 51535  | -4741 | 3418 | AN10116 |
| 339  | CONTIG12 | 131867 | 132951 | 2.55 | 0.00E+00 | transcription_start_site | - | 127292 | 127292 | -5117 | 3426 | AN10119 |
| 339  | CONTIG12 | 131867 | 132951 | 2.55 | 0.00E+00 | transcription_start_site | - | 127013 | 127013 | -5396 | 3427 | AN10119 |

|      |          |        |        |      |          |                          |   |        |        |       |      |         |
|------|----------|--------|--------|------|----------|--------------------------|---|--------|--------|-------|------|---------|
| 1424 | CONTIG12 | 143106 | 143605 | 1.33 | 4.78E-02 | transcription_start_site | - | 142697 | 142697 | -658  | 3432 | AN10120 |
| 1424 | CONTIG12 | 143106 | 143605 | 1.33 | 4.78E-02 | transcription_start_site | - | 142493 | 142493 | -862  | 3433 | AN10120 |
| 1424 | CONTIG12 | 143106 | 143605 | 1.33 | 4.78E-02 | transcription_start_site | - | 141136 | 141136 | -2219 | 3434 | AN10120 |
| 1424 | CONTIG12 | 143106 | 143605 | 1.33 | 4.78E-02 | transcription_start_site | - | 140769 | 140769 | -2586 | 3435 | AN10120 |
| 339  | CONTIG12 | 131867 | 132951 | 2.55 | 0.00E+00 | transcription_start_site | - | 128213 | 128213 | -4196 | 3436 | AN10121 |
| 339  | CONTIG12 | 131867 | 132951 | 2.55 | 0.00E+00 | transcription_start_site | - | 128036 | 128036 | -4373 | 3437 | AN10121 |
| 339  | CONTIG12 | 131867 | 132951 | 2.55 | 0.00E+00 | transcription_start_site | - | 127903 | 127903 | -4506 | 3438 | AN10121 |
| 339  | CONTIG12 | 131867 | 132951 | 2.55 | 0.00E+00 | transcription_start_site | - | 127785 | 127785 | -4624 | 3439 | AN10121 |
| 1424 | CONTIG12 | 143106 | 143605 | 1.33 | 4.78E-02 | transcription_start_site | - | 140089 | 140089 | -3266 | 3440 | AN10122 |
| 1424 | CONTIG12 | 143106 | 143605 | 1.33 | 4.78E-02 | transcription_start_site | - | 139978 | 139978 | -3377 | 3441 | AN10122 |
| 1424 | CONTIG12 | 143106 | 143605 | 1.33 | 4.78E-02 | transcription_start_site | - | 139492 | 139492 | -3863 | 3442 | AN10122 |
| 1417 | CONTIG13 | 79212  | 79495  | 1.34 | 1.08E-01 | transcription_start_site | - | 78980  | 78980  | -373  | 3448 | AN10124 |
| 1417 | CONTIG13 | 79212  | 79495  | 1.34 | 1.08E-01 | transcription_start_site | - | 78855  | 78855  | -498  | 3449 | AN10124 |
| 1417 | CONTIG13 | 79212  | 79495  | 1.34 | 1.08E-01 | transcription_start_site | - | 78599  | 78599  | -754  | 3450 | AN10124 |
| 1417 | CONTIG13 | 79212  | 79495  | 1.34 | 1.08E-01 | transcription_start_site | - | 78073  | 78073  | -1280 | 3451 | AN10124 |
| 1417 | CONTIG13 | 79212  | 79495  | 1.34 | 1.08E-01 | transcription_start_site | - | 77415  | 77415  | -1938 | 3452 | AN10124 |
| 1171 | CONTIG14 | 32642  | 32986  | 1.56 | 3.01E-02 | transcription_start_site | + | 35477  | 35477  | -2663 | 3457 | AN10128 |
| 1171 | CONTIG14 | 32642  | 32986  | 1.56 | 3.01E-02 | transcription_start_site | + | 35678  | 35678  | -2864 | 3458 | AN10128 |
| 1171 | CONTIG14 | 32642  | 32986  | 1.56 | 3.01E-02 | transcription_start_site | + | 35797  | 35797  | -2983 | 3459 | AN10128 |
| 1171 | CONTIG14 | 32642  | 32986  | 1.56 | 3.01E-02 | transcription_start_site | + | 36371  | 36371  | -3557 | 3460 | AN10128 |
| 1171 | CONTIG14 | 32642  | 32986  | 1.56 | 3.01E-02 | transcription_start_site | + | 36526  | 36526  | -3712 | 3461 | AN10128 |
| 1171 | CONTIG14 | 32642  | 32986  | 1.56 | 3.01E-02 | transcription_start_site | + | 37574  | 37574  | -4760 | 3462 | AN10128 |
| 1171 | CONTIG14 | 32642  | 32986  | 1.56 | 3.01E-02 | transcription_start_site | + | 37730  | 37730  | -4916 | 3463 | AN10128 |
| 1481 | CONTIG14 | 34063  | 35162  | 1.29 | 6.74E-02 | transcription_start_site | + | 35477  | 35477  | -864  | 3457 | AN10128 |
| 1481 | CONTIG14 | 34063  | 35162  | 1.29 | 6.74E-02 | transcription_start_site | + | 35678  | 35678  | -1065 | 3458 | AN10128 |
| 1481 | CONTIG14 | 34063  | 35162  | 1.29 | 6.74E-02 | transcription_start_site | + | 35797  | 35797  | -1184 | 3459 | AN10128 |
| 1481 | CONTIG14 | 34063  | 35162  | 1.29 | 6.74E-02 | transcription_start_site | + | 36371  | 36371  | -1758 | 3460 | AN10128 |
| 1481 | CONTIG14 | 34063  | 35162  | 1.29 | 6.74E-02 | transcription_start_site | + | 36526  | 36526  | -1913 | 3461 | AN10128 |
| 1481 | CONTIG14 | 34063  | 35162  | 1.29 | 6.74E-02 | transcription_start_site | + | 37574  | 37574  | -2961 | 3462 | AN10128 |
| 1481 | CONTIG14 | 34063  | 35162  | 1.29 | 6.74E-02 | transcription_start_site | + | 37730  | 37730  | -3117 | 3463 | AN10128 |
| 1481 | CONTIG14 | 34063  | 35162  | 1.29 | 6.74E-02 | transcription_start_site | + | 38450  | 38450  | -3837 | 3464 | AN10128 |
| 1481 | CONTIG14 | 34063  | 35162  | 1.29 | 6.74E-02 | transcription_start_site | + | 39892  | 39892  | -5279 | 3481 | AN10133 |
| 1717 | CONTIG14 | 248489 | 248838 | 1.13 | 1.08E-01 | transcription_start_site | - | 245397 | 245397 | -3266 | 3487 | AN10136 |
| 1717 | CONTIG14 | 248489 | 248838 | 1.13 | 1.08E-01 | transcription_start_site | - | 245076 | 245076 | -3587 | 3488 | AN10136 |
| 1717 | CONTIG14 | 248489 | 248838 | 1.13 | 1.08E-01 | transcription_start_site | - | 244285 | 244285 | -4378 | 3489 | AN10136 |
| 1717 | CONTIG14 | 248489 | 248838 | 1.13 | 1.08E-01 | transcription_start_site | - | 244068 | 244068 | -4595 | 3490 | AN10136 |
| 1717 | CONTIG14 | 248489 | 248838 | 1.13 | 1.08E-01 | transcription_start_site | - | 243848 | 243848 | -4815 | 3491 | AN10136 |
| 1717 | CONTIG14 | 248489 | 248838 | 1.13 | 1.08E-01 | transcription_start_site | - | 243634 | 243634 | -5029 | 3492 | AN10136 |
| 1305 | CONTIG15 | 9546   | 9820   | 1.43 | 1.37E-02 | transcription_start_site | + | 14455  | 14455  | -4772 | 3496 | AN10138 |
| 1374 | CONTIG15 | 64965  | 65379  | 1.37 | 1.80E-02 | transcription_start_site | + | 70159  | 70159  | -4987 | 3500 | AN1014  |
| 2067 | CONTIG15 | 69685  | 70269  | 0.9  | 6.50E-02 | transcription_start_site | + | 70159  | 70159  | -182  | 3500 | AN1014  |
| 2067 | CONTIG15 | 69685  | 70269  | 0.9  | 6.50E-02 | transcription_start_site | + | 70745  | 70745  | -768  | 3501 | AN1014  |
| 2067 | CONTIG15 | 69685  | 70269  | 0.9  | 6.50E-02 | transcription_start_site | + | 71444  | 71444  | -1467 | 3502 | AN1014  |
| 2067 | CONTIG15 | 69685  | 70269  | 0.9  | 6.50E-02 | transcription_start_site | + | 72428  | 72428  | -2451 | 3503 | AN1014  |
| 1374 | CONTIG15 | 64965  | 65379  | 1.37 | 1.80E-02 | transcription_start_site | + | 65805  | 65805  | -633  | 3504 | AN10140 |
| 1374 | CONTIG15 | 64965  | 65379  | 1.37 | 1.80E-02 | transcription_start_site | + | 65981  | 65981  | -809  | 3505 | AN10140 |
| 1374 | CONTIG15 | 64965  | 65379  | 1.37 | 1.80E-02 | transcription_start_site | + | 68850  | 68850  | -3678 | 3506 | AN10140 |
| 2067 | CONTIG15 | 69685  | 70269  | 0.9  | 6.50E-02 | transcription_start_site | + | 68850  | 68850  | 1127  | 3506 | AN10140 |
| 2290 | CONTIG15 | 28127  | 29166  | 0.68 | 1.81E-01 | transcription_start_site | + | 27196  | 27196  | 1450  | 3511 | AN10142 |
| 181  | CONTIG16 | 23413  | 23917  | 2.88 | 3.81E-04 | transcription_start_site | - | 19021  | 19021  | -4644 | 3517 | AN10145 |
| 181  | CONTIG16 | 23413  | 23917  | 2.88 | 3.81E-04 | transcription_start_site | - | 18571  | 18571  | -5094 | 3518 | AN10145 |
| 696  | CONTIG16 | 22068  | 22932  | 2.05 | 9.75E-04 | transcription_start_site | - | 19021  | 19021  | -3479 | 3517 | AN10145 |
| 696  | CONTIG16 | 22068  | 22932  | 2.05 | 9.75E-04 | transcription_start_site | - | 18571  | 18571  | -3929 | 3518 | AN10145 |
| 439  | CONTIG16 | 307064 | 307413 | 2.4  | 1.41E-03 | transcription_start_site | - | 306697 | 306697 | -541  | 3526 | AN10149 |
| 439  | CONTIG16 | 307064 | 307413 | 2.4  | 1.41E-03 | transcription_start_site | - | 306428 | 306428 | -810  | 3527 | AN10149 |
| 208  | CONTIG15 | 79576  | 80315  | 2.8  | 0.00E+00 | transcription_start_site | - | 75982  | 75982  | -3963 | 3528 | AN1015  |
| 208  | CONTIG15 | 79576  | 80315  | 2.8  | 0.00E+00 | transcription_start_site | - | 75739  | 75739  | -4206 | 3529 | AN1015  |

|      |          |        |        |      |          |                          |   |        |        |       |      |         |
|------|----------|--------|--------|------|----------|--------------------------|---|--------|--------|-------|------|---------|
| 208  | CONTIG15 | 79576  | 80315  | 2.8  | 0.00E+00 | transcription_start_site | - | 75655  | 75655  | -4290 | 3530 | AN1015  |
| 208  | CONTIG15 | 79576  | 80315  | 2.8  | 0.00E+00 | transcription_start_site | - | 75566  | 75566  | -4379 | 3531 | AN1015  |
| 208  | CONTIG15 | 79576  | 80315  | 2.8  | 0.00E+00 | transcription_start_site | - | 75452  | 75452  | -4493 | 3532 | AN1015  |
| 208  | CONTIG15 | 79576  | 80315  | 2.8  | 0.00E+00 | transcription_start_site | - | 75298  | 75298  | -4647 | 3533 | AN1015  |
| 208  | CONTIG15 | 79576  | 80315  | 2.8  | 0.00E+00 | transcription_start_site | - | 75170  | 75170  | -4775 | 3534 | AN1015  |
| 1970 | CONTIG15 | 76295  | 76629  | 0.96 | 8.63E-02 | transcription_start_site | - | 75982  | 75982  | -480  | 3528 | AN1015  |
| 1970 | CONTIG15 | 76295  | 76629  | 0.96 | 8.63E-02 | transcription_start_site | - | 75739  | 75739  | -723  | 3529 | AN1015  |
| 1970 | CONTIG15 | 76295  | 76629  | 0.96 | 8.63E-02 | transcription_start_site | - | 75655  | 75655  | -807  | 3530 | AN1015  |
| 1970 | CONTIG15 | 76295  | 76629  | 0.96 | 8.63E-02 | transcription_start_site | - | 75566  | 75566  | -896  | 3531 | AN1015  |
| 1970 | CONTIG15 | 76295  | 76629  | 0.96 | 8.63E-02 | transcription_start_site | - | 75452  | 75452  | -1010 | 3532 | AN1015  |
| 1970 | CONTIG15 | 76295  | 76629  | 0.96 | 8.63E-02 | transcription_start_site | - | 75298  | 75298  | -1164 | 3533 | AN1015  |
| 1970 | CONTIG15 | 76295  | 76629  | 0.96 | 8.63E-02 | transcription_start_site | - | 75170  | 75170  | -1292 | 3534 | AN1015  |
| 1970 | CONTIG15 | 76295  | 76629  | 0.96 | 8.63E-02 | transcription_start_site | - | 73307  | 73307  | -3155 | 3535 | AN1015  |
| 230  | CONTIG16 | 331659 | 332005 | 2.75 | 1.09E-03 | transcription_start_site | + | 331357 | 331357 | 475   | 3539 | AN10150 |
| 230  | CONTIG16 | 331659 | 332005 | 2.75 | 1.09E-03 | transcription_start_site | + | 331150 | 331150 | 682   | 3538 | AN10150 |
| 230  | CONTIG16 | 331659 | 332005 | 2.75 | 1.09E-03 | transcription_start_site | + | 330831 | 330831 | 1001  | 3537 | AN10150 |
| 439  | CONTIG16 | 307064 | 307413 | 2.4  | 1.41E-03 | transcription_start_site | - | 304949 | 304949 | -2289 | 3554 | AN10155 |
| 439  | CONTIG16 | 307064 | 307413 | 2.4  | 1.41E-03 | transcription_start_site | - | 304463 | 304463 | -2775 | 3555 | AN10155 |
| 439  | CONTIG16 | 307064 | 307413 | 2.4  | 1.41E-03 | transcription_start_site | - | 303766 | 303766 | -3472 | 3556 | AN10155 |
| 1448 | CONTIG16 | 288079 | 288957 | 1.31 | 9.60E-02 | transcription_start_site | - | 288286 | 288286 | -232  | 3557 | AN10156 |
| 1448 | CONTIG16 | 288079 | 288957 | 1.31 | 9.60E-02 | transcription_start_site | - | 288066 | 288066 | -452  | 3558 | AN10156 |
| 1448 | CONTIG16 | 288079 | 288957 | 1.31 | 9.60E-02 | transcription_start_site | - | 287883 | 287883 | -635  | 3559 | AN10156 |
| 1448 | CONTIG16 | 288079 | 288957 | 1.31 | 9.60E-02 | transcription_start_site | - | 287374 | 287374 | -1144 | 3560 | AN10156 |
| 1448 | CONTIG16 | 288079 | 288957 | 1.31 | 9.60E-02 | transcription_start_site | - | 286989 | 286989 | -1529 | 3561 | AN10156 |
| 1644 | CONTIG16 | 144616 | 144971 | 1.18 | 1.38E-01 | transcription_start_site | + | 145762 | 145762 | -968  | 3562 | AN10157 |
| 1302 | CONTIG16 | 66685  | 67048  | 1.44 | 6.74E-02 | transcription_start_site | - | 64659  | 64659  | -2207 | 3565 | AN10159 |
| 1302 | CONTIG16 | 66685  | 67048  | 1.44 | 6.74E-02 | transcription_start_site | - | 64584  | 64584  | -2282 | 3566 | AN10159 |
| 1302 | CONTIG16 | 66685  | 67048  | 1.44 | 6.74E-02 | transcription_start_site | - | 64475  | 64475  | -2391 | 3567 | AN10159 |
| 1302 | CONTIG16 | 66685  | 67048  | 1.44 | 6.74E-02 | transcription_start_site | - | 64345  | 64345  | -2521 | 3568 | AN10159 |
| 208  | CONTIG15 | 79576  | 80315  | 2.8  | 0.00E+00 | transcription_start_site | - | 78761  | 78761  | -1184 | 3569 | AN1016  |
| 208  | CONTIG15 | 79576  | 80315  | 2.8  | 0.00E+00 | transcription_start_site | - | 78546  | 78546  | -1399 | 3570 | AN1016  |
| 208  | CONTIG15 | 79576  | 80315  | 2.8  | 0.00E+00 | transcription_start_site | - | 78149  | 78149  | -1796 | 3571 | AN1016  |
| 208  | CONTIG15 | 79576  | 80315  | 2.8  | 0.00E+00 | transcription_start_site | - | 77967  | 77967  | -1978 | 3572 | AN1016  |
| 208  | CONTIG15 | 79576  | 80315  | 2.8  | 0.00E+00 | transcription_start_site | - | 77788  | 77788  | -2157 | 3573 | AN1016  |
| 208  | CONTIG15 | 79576  | 80315  | 2.8  | 0.00E+00 | transcription_start_site | - | 77490  | 77490  | -2455 | 3574 | AN1016  |
| 805  | CONTIG15 | 81986  | 82250  | 1.93 | 1.45E-03 | transcription_start_site | - | 78761  | 78761  | -3357 | 3569 | AN1016  |
| 805  | CONTIG15 | 81986  | 82250  | 1.93 | 1.45E-03 | transcription_start_site | - | 78546  | 78546  | -3572 | 3570 | AN1016  |
| 805  | CONTIG15 | 81986  | 82250  | 1.93 | 1.45E-03 | transcription_start_site | - | 78149  | 78149  | -3969 | 3571 | AN1016  |
| 805  | CONTIG15 | 81986  | 82250  | 1.93 | 1.45E-03 | transcription_start_site | - | 77967  | 77967  | -4151 | 3572 | AN1016  |
| 805  | CONTIG15 | 81986  | 82250  | 1.93 | 1.45E-03 | transcription_start_site | - | 77788  | 77788  | -4330 | 3573 | AN1016  |
| 805  | CONTIG15 | 81986  | 82250  | 1.93 | 1.45E-03 | transcription_start_site | - | 77490  | 77490  | -4628 | 3574 | AN1016  |
| 1970 | CONTIG15 | 76295  | 76629  | 0.96 | 8.63E-02 | transcription_start_site | - | 77490  | 77490  | 1028  | 3574 | AN1016  |
| 4    | CONTIG16 | 24243  | 24517  | 3.63 | 0.00E+00 | transcription_start_site | - | 20149  | 20149  | -4231 | 3575 | AN10160 |
| 181  | CONTIG16 | 23413  | 23917  | 2.88 | 3.81E-04 | transcription_start_site | - | 20149  | 20149  | -3516 | 3575 | AN10160 |
| 696  | CONTIG16 | 22068  | 22932  | 2.05 | 9.75E-04 | transcription_start_site | - | 20149  | 20149  | -2351 | 3575 | AN10160 |
| 372  | CONTIG16 | 139656 | 140300 | 2.49 | 1.09E-03 | transcription_start_site | + | 143150 | 143150 | -3172 | 3582 | AN10164 |
| 372  | CONTIG16 | 139656 | 140300 | 2.49 | 1.09E-03 | transcription_start_site | + | 143600 | 143600 | -3622 | 3583 | AN10164 |
| 372  | CONTIG16 | 139656 | 140300 | 2.49 | 1.09E-03 | transcription_start_site | + | 143760 | 143760 | -3782 | 3584 | AN10164 |
| 372  | CONTIG16 | 139656 | 140300 | 2.49 | 1.09E-03 | transcription_start_site | + | 144459 | 144459 | -4481 | 3585 | AN10164 |
| 372  | CONTIG16 | 139656 | 140300 | 2.49 | 1.09E-03 | transcription_start_site | + | 144659 | 144659 | -4681 | 3586 | AN10164 |
| 1644 | CONTIG16 | 144616 | 144971 | 1.18 | 1.38E-01 | transcription_start_site | + | 144659 | 144659 | 134   | 3586 | AN10164 |
| 1644 | CONTIG16 | 144616 | 144971 | 1.18 | 1.38E-01 | transcription_start_site | + | 144459 | 144459 | 334   | 3585 | AN10164 |
| 1644 | CONTIG16 | 144616 | 144971 | 1.18 | 1.38E-01 | transcription_start_site | + | 143760 | 143760 | 1033  | 3584 | AN10164 |
| 208  | CONTIG15 | 79576  | 80315  | 2.8  | 0.00E+00 | transcription_start_site | + | 82917  | 82917  | -2971 | 3600 | AN1017  |
| 208  | CONTIG15 | 79576  | 80315  | 2.8  | 0.00E+00 | transcription_start_site | + | 83034  | 83034  | -3088 | 3601 | AN1017  |
| 208  | CONTIG15 | 79576  | 80315  | 2.8  | 0.00E+00 | transcription_start_site | + | 83194  | 83194  | -3248 | 3602 | AN1017  |
| 208  | CONTIG15 | 79576  | 80315  | 2.8  | 0.00E+00 | transcription_start_site | + | 83386  | 83386  | -3440 | 3603 | AN1017  |

|      |          |        |        |      |          |                          |   |        |        |       |      |         |
|------|----------|--------|--------|------|----------|--------------------------|---|--------|--------|-------|------|---------|
| 208  | CONTIG15 | 79576  | 80315  | 2.8  | 0.00E+00 | transcription_start_site | + | 83494  | 83494  | -3548 | 3604 | AN1017  |
| 208  | CONTIG15 | 79576  | 80315  | 2.8  | 0.00E+00 | transcription_start_site | + | 83647  | 83647  | -3701 | 3605 | AN1017  |
| 208  | CONTIG15 | 79576  | 80315  | 2.8  | 0.00E+00 | transcription_start_site | + | 84070  | 84070  | -4124 | 3606 | AN1017  |
| 208  | CONTIG15 | 79576  | 80315  | 2.8  | 0.00E+00 | transcription_start_site | + | 84249  | 84249  | -4303 | 3607 | AN1017  |
| 208  | CONTIG15 | 79576  | 80315  | 2.8  | 0.00E+00 | transcription_start_site | + | 84492  | 84492  | -4546 | 3608 | AN1017  |
| 805  | CONTIG15 | 81986  | 82250  | 1.93 | 1.45E-03 | transcription_start_site | + | 82917  | 82917  | -799  | 3600 | AN1017  |
| 805  | CONTIG15 | 81986  | 82250  | 1.93 | 1.45E-03 | transcription_start_site | + | 83034  | 83034  | -916  | 3601 | AN1017  |
| 805  | CONTIG15 | 81986  | 82250  | 1.93 | 1.45E-03 | transcription_start_site | + | 83194  | 83194  | -1076 | 3602 | AN1017  |
| 805  | CONTIG15 | 81986  | 82250  | 1.93 | 1.45E-03 | transcription_start_site | + | 83386  | 83386  | -1268 | 3603 | AN1017  |
| 805  | CONTIG15 | 81986  | 82250  | 1.93 | 1.45E-03 | transcription_start_site | + | 83494  | 83494  | -1376 | 3604 | AN1017  |
| 805  | CONTIG15 | 81986  | 82250  | 1.93 | 1.45E-03 | transcription_start_site | + | 83647  | 83647  | -1529 | 3605 | AN1017  |
| 805  | CONTIG15 | 81986  | 82250  | 1.93 | 1.45E-03 | transcription_start_site | + | 84070  | 84070  | -1952 | 3606 | AN1017  |
| 805  | CONTIG15 | 81986  | 82250  | 1.93 | 1.45E-03 | transcription_start_site | + | 84249  | 84249  | -2131 | 3607 | AN1017  |
| 805  | CONTIG15 | 81986  | 82250  | 1.93 | 1.45E-03 | transcription_start_site | + | 84492  | 84492  | -2374 | 3608 | AN1017  |
| 1585 | CONTIG17 | 309614 | 310328 | 1.21 | 3.02E-02 | transcription_start_site | - | 309405 | 309405 | -566  | 3612 | AN10171 |
| 1585 | CONTIG17 | 309614 | 310328 | 1.21 | 3.02E-02 | transcription_start_site | - | 308287 | 308287 | -1684 | 3613 | AN10171 |
| 2131 | CONTIG17 | 337503 | 337789 | 0.86 | 1.97E-01 | transcription_start_site | - | 337378 | 337378 | -268  | 3614 | AN10172 |
| 2131 | CONTIG17 | 337503 | 337789 | 0.86 | 1.97E-01 | transcription_start_site | - | 337241 | 337241 | -405  | 3615 | AN10172 |
| 2131 | CONTIG17 | 337503 | 337789 | 0.86 | 1.97E-01 | transcription_start_site | - | 337144 | 337144 | -502  | 3616 | AN10172 |
| 2131 | CONTIG17 | 337503 | 337789 | 0.86 | 1.97E-01 | transcription_start_site | - | 337053 | 337053 | -593  | 3617 | AN10172 |
| 2131 | CONTIG17 | 337503 | 337789 | 0.86 | 1.97E-01 | transcription_start_site | - | 336876 | 336876 | -770  | 3618 | AN10172 |
| 1102 | CONTIG17 | 306389 | 306808 | 1.61 | 1.54E-02 | transcription_start_site | - | 306514 | 306514 | -84   | 3625 | AN10176 |
| 1102 | CONTIG17 | 306389 | 306808 | 1.61 | 1.54E-02 | transcription_start_site | - | 306375 | 306375 | -223  | 3626 | AN10176 |
| 1585 | CONTIG17 | 309614 | 310328 | 1.21 | 3.02E-02 | transcription_start_site | - | 306514 | 306514 | -3457 | 3625 | AN10176 |
| 1585 | CONTIG17 | 309614 | 310328 | 1.21 | 3.02E-02 | transcription_start_site | - | 306375 | 306375 | -3596 | 3626 | AN10176 |
| 1034 | CONTIG17 | 72989  | 73413  | 1.68 | 4.92E-03 | transcription_start_site | + | 72666  | 72666  | 535   | 3627 | AN10177 |
| 2131 | CONTIG17 | 337503 | 337789 | 0.86 | 1.97E-01 | transcription_start_site | - | 338357 | 338357 | 711   | 3633 | AN10179 |
| 208  | CONTIG15 | 79576  | 80315  | 2.8  | 0.00E+00 | transcription_start_site | + | 85232  | 85232  | -5286 | 3634 | AN1018  |
| 805  | CONTIG15 | 81986  | 82250  | 1.93 | 1.45E-03 | transcription_start_site | + | 85232  | 85232  | -3114 | 3634 | AN1018  |
| 805  | CONTIG15 | 81986  | 82250  | 1.93 | 1.45E-03 | transcription_start_site | + | 85487  | 85487  | -3369 | 3635 | AN1018  |
| 805  | CONTIG15 | 81986  | 82250  | 1.93 | 1.45E-03 | transcription_start_site | + | 85653  | 85653  | -3535 | 3636 | AN1018  |
| 805  | CONTIG15 | 81986  | 82250  | 1.93 | 1.45E-03 | transcription_start_site | + | 86024  | 86024  | -3906 | 3637 | AN1018  |
| 805  | CONTIG15 | 81986  | 82250  | 1.93 | 1.45E-03 | transcription_start_site | + | 86107  | 86107  | -3989 | 3638 | AN1018  |
| 805  | CONTIG15 | 81986  | 82250  | 1.93 | 1.45E-03 | transcription_start_site | + | 86223  | 86223  | -4105 | 3639 | AN1018  |
| 805  | CONTIG15 | 81986  | 82250  | 1.93 | 1.45E-03 | transcription_start_site | + | 86360  | 86360  | -4242 | 3640 | AN1018  |
| 805  | CONTIG15 | 81986  | 82250  | 1.93 | 1.45E-03 | transcription_start_site | + | 86586  | 86586  | -4468 | 3641 | AN1018  |
| 805  | CONTIG15 | 81986  | 82250  | 1.93 | 1.45E-03 | transcription_start_site | + | 86681  | 86681  | -4563 | 3642 | AN1018  |
| 805  | CONTIG15 | 81986  | 82250  | 1.93 | 1.45E-03 | transcription_start_site | + | 86874  | 86874  | -4756 | 3643 | AN1018  |
| 266  | CONTIG18 | 99093  | 99662  | 2.68 | 0.00E+00 | transcription_start_site | - | 98436  | 98436  | -941  | 3648 | AN10181 |
| 2168 | CONTIG18 | 135528 | 135967 | 0.82 | 1.15E-01 | transcription_start_site | - | 132282 | 132282 | -3465 | 3649 | AN10182 |
| 2168 | CONTIG18 | 135528 | 135967 | 0.82 | 1.15E-01 | transcription_start_site | - | 132121 | 132121 | -3626 | 3650 | AN10182 |
| 2168 | CONTIG18 | 135528 | 135967 | 0.82 | 1.15E-01 | transcription_start_site | - | 131355 | 131355 | -4392 | 3651 | AN10182 |
| 266  | CONTIG18 | 99093  | 99662  | 2.68 | 0.00E+00 | transcription_start_site | - | 95902  | 95902  | -3475 | 3652 | AN10183 |
| 266  | CONTIG18 | 99093  | 99662  | 2.68 | 0.00E+00 | transcription_start_site | - | 95434  | 95434  | -3943 | 3653 | AN10183 |
| 2308 | CONTIG19 | 29644  | 30129  | 0.66 | 1.97E-01 | transcription_start_site | + | 31617  | 31617  | -1730 | 3654 | AN10184 |
| 2308 | CONTIG19 | 29644  | 30129  | 0.66 | 1.97E-01 | transcription_start_site | + | 31864  | 31864  | -1977 | 3655 | AN10184 |
| 2308 | CONTIG19 | 29644  | 30129  | 0.66 | 1.97E-01 | transcription_start_site | + | 32288  | 32288  | -2401 | 3656 | AN10184 |
| 937  | CONTIG19 | 60171  | 60438  | 1.78 | 7.06E-04 | transcription_start_site | - | 60083  | 60083  | -221  | 3660 | AN10186 |
| 937  | CONTIG19 | 60171  | 60438  | 1.78 | 7.06E-04 | transcription_start_site | - | 59996  | 59996  | -308  | 3661 | AN10186 |
| 937  | CONTIG19 | 60171  | 60438  | 1.78 | 7.06E-04 | transcription_start_site | - | 59847  | 59847  | -457  | 3662 | AN10186 |
| 937  | CONTIG19 | 60171  | 60438  | 1.78 | 7.06E-04 | transcription_start_site | - | 59409  | 59409  | -895  | 3663 | AN10186 |
| 937  | CONTIG19 | 60171  | 60438  | 1.78 | 7.06E-04 | transcription_start_site | - | 58928  | 58928  | -1376 | 3664 | AN10186 |
| 937  | CONTIG19 | 60171  | 60438  | 1.78 | 7.06E-04 | transcription_start_site | - | 58579  | 58579  | -1725 | 3665 | AN10186 |
| 937  | CONTIG19 | 60171  | 60438  | 1.78 | 7.06E-04 | transcription_start_site | - | 58425  | 58425  | -1879 | 3666 | AN10186 |
| 1512 | CONTIG19 | 61426  | 61939  | 1.26 | 1.37E-02 | transcription_start_site | - | 60083  | 60083  | -1599 | 3660 | AN10186 |
| 1512 | CONTIG19 | 61426  | 61939  | 1.26 | 1.37E-02 | transcription_start_site | - | 59996  | 59996  | -1686 | 3661 | AN10186 |
| 1512 | CONTIG19 | 61426  | 61939  | 1.26 | 1.37E-02 | transcription_start_site | - | 59847  | 59847  | -1835 | 3662 | AN10186 |

|      |          |        |        |      |          |                          |   |        |        |       |      |         |
|------|----------|--------|--------|------|----------|--------------------------|---|--------|--------|-------|------|---------|
| 1512 | CONTIG19 | 61426  | 61939  | 1.26 | 1.37E-02 | transcription_start_site | - | 59409  | 59409  | -2273 | 3663 | AN10186 |
| 1512 | CONTIG19 | 61426  | 61939  | 1.26 | 1.37E-02 | transcription_start_site | - | 58928  | 58928  | -2754 | 3664 | AN10186 |
| 1512 | CONTIG19 | 61426  | 61939  | 1.26 | 1.37E-02 | transcription_start_site | - | 58579  | 58579  | -3103 | 3665 | AN10186 |
| 1512 | CONTIG19 | 61426  | 61939  | 1.26 | 1.37E-02 | transcription_start_site | - | 58425  | 58425  | -3257 | 3666 | AN10186 |
| 937  | CONTIG19 | 60171  | 60438  | 1.78 | 7.06E-04 | transcription_start_site | - | 57982  | 57982  | -2322 | 3669 | AN10188 |
| 937  | CONTIG19 | 60171  | 60438  | 1.78 | 7.06E-04 | transcription_start_site | - | 57811  | 57811  | -2493 | 3670 | AN10188 |
| 937  | CONTIG19 | 60171  | 60438  | 1.78 | 7.06E-04 | transcription_start_site | - | 57631  | 57631  | -2673 | 3671 | AN10188 |
| 937  | CONTIG19 | 60171  | 60438  | 1.78 | 7.06E-04 | transcription_start_site | - | 57343  | 57343  | -2961 | 3672 | AN10188 |
| 1512 | CONTIG19 | 61426  | 61939  | 1.26 | 1.37E-02 | transcription_start_site | - | 57982  | 57982  | -3700 | 3669 | AN10188 |
| 1512 | CONTIG19 | 61426  | 61939  | 1.26 | 1.37E-02 | transcription_start_site | - | 57811  | 57811  | -3871 | 3670 | AN10188 |
| 1512 | CONTIG19 | 61426  | 61939  | 1.26 | 1.37E-02 | transcription_start_site | - | 57631  | 57631  | -4051 | 3671 | AN10188 |
| 1512 | CONTIG19 | 61426  | 61939  | 1.26 | 1.37E-02 | transcription_start_site | - | 57343  | 57343  | -4339 | 3672 | AN10188 |
| 2308 | CONTIG19 | 29644  | 30129  | 0.66 | 1.97E-01 | transcription_start_site | + | 30240  | 30240  | -353  | 3673 | AN10189 |
| 2308 | CONTIG19 | 29644  | 30129  | 0.66 | 1.97E-01 | transcription_start_site | + | 30693  | 30693  | -806  | 3674 | AN10189 |
| 2308 | CONTIG19 | 29644  | 30129  | 0.66 | 1.97E-01 | transcription_start_site | + | 30864  | 30864  | -977  | 3675 | AN10189 |
| 2308 | CONTIG19 | 29644  | 30129  | 0.66 | 1.97E-01 | transcription_start_site | + | 31038  | 31038  | -1151 | 3676 | AN10189 |
| 2018 | CONTIG15 | 95102  | 95391  | 0.93 | 9.60E-02 | transcription_start_site | - | 91674  | 91674  | -3572 | 3677 | AN1019  |
| 2018 | CONTIG15 | 95102  | 95391  | 0.93 | 9.60E-02 | transcription_start_site | - | 91543  | 91543  | -3703 | 3678 | AN1019  |
| 2018 | CONTIG15 | 95102  | 95391  | 0.93 | 9.60E-02 | transcription_start_site | - | 91401  | 91401  | -3845 | 3679 | AN1019  |
| 2018 | CONTIG15 | 95102  | 95391  | 0.93 | 9.60E-02 | transcription_start_site | - | 91319  | 91319  | -3927 | 3680 | AN1019  |
| 2018 | CONTIG15 | 95102  | 95391  | 0.93 | 9.60E-02 | transcription_start_site | - | 91171  | 91171  | -4075 | 3681 | AN1019  |
| 219  | CONTIG22 | 183468 | 183805 | 2.79 | 7.06E-04 | transcription_start_site | - | 181212 | 181212 | -2424 | 3686 | AN10192 |
| 1482 | CONTIG22 | 213228 | 213502 | 1.29 | 9.60E-02 | transcription_start_site | + | 214174 | 214174 | -809  | 3687 | AN10193 |
| 1482 | CONTIG22 | 213228 | 213502 | 1.29 | 9.60E-02 | transcription_start_site | + | 214347 | 214347 | -982  | 3688 | AN10193 |
| 1482 | CONTIG22 | 213228 | 213502 | 1.29 | 9.60E-02 | transcription_start_site | + | 215003 | 215003 | -1638 | 3689 | AN10193 |
| 1876 | CONTIG22 | 259580 | 259868 | 1.03 | 1.97E-01 | transcription_start_site | - | 258760 | 258760 | -964  | 3697 | AN10196 |
| 219  | CONTIG22 | 183468 | 183805 | 2.79 | 7.06E-04 | transcription_start_site | - | 182890 | 182890 | -746  | 3698 | AN10197 |
| 219  | CONTIG22 | 183468 | 183805 | 2.79 | 7.06E-04 | transcription_start_site | - | 182583 | 182583 | -1053 | 3699 | AN10197 |
| 219  | CONTIG22 | 183468 | 183805 | 2.79 | 7.06E-04 | transcription_start_site | - | 182491 | 182491 | -1145 | 3700 | AN10197 |
| 219  | CONTIG22 | 183468 | 183805 | 2.79 | 7.06E-04 | transcription_start_site | - | 182321 | 182321 | -1315 | 3701 | AN10197 |
| 1876 | CONTIG22 | 259580 | 259868 | 1.03 | 1.97E-01 | transcription_start_site | - | 256877 | 256877 | -2847 | 3708 | AN10201 |
| 1876 | CONTIG22 | 259580 | 259868 | 1.03 | 1.97E-01 | transcription_start_site | - | 255282 | 255282 | -4442 | 3709 | AN10201 |
| 1482 | CONTIG22 | 213228 | 213502 | 1.29 | 9.60E-02 | transcription_start_site | + | 216071 | 216071 | -2706 | 3720 | AN10207 |
| 1482 | CONTIG22 | 213228 | 213502 | 1.29 | 9.60E-02 | transcription_start_site | + | 216325 | 216325 | -2960 | 3721 | AN10207 |
| 1482 | CONTIG22 | 213228 | 213502 | 1.29 | 9.60E-02 | transcription_start_site | + | 216585 | 216585 | -3220 | 3722 | AN10207 |
| 1482 | CONTIG22 | 213228 | 213502 | 1.29 | 9.60E-02 | transcription_start_site | + | 216794 | 216794 | -3429 | 3723 | AN10207 |
| 1482 | CONTIG22 | 213228 | 213502 | 1.29 | 9.60E-02 | transcription_start_site | + | 217277 | 217277 | -3912 | 3724 | AN10207 |
| 1482 | CONTIG22 | 213228 | 213502 | 1.29 | 9.60E-02 | transcription_start_site | + | 217430 | 217430 | -4065 | 3725 | AN10207 |
| 1482 | CONTIG22 | 213228 | 213502 | 1.29 | 9.60E-02 | transcription_start_site | + | 217538 | 217538 | -4173 | 3726 | AN10207 |
| 2018 | CONTIG15 | 95102  | 95391  | 0.93 | 9.60E-02 | transcription_start_site | - | 94823  | 94823  | -423  | 3737 | AN1021  |
| 2018 | CONTIG15 | 95102  | 95391  | 0.93 | 9.60E-02 | transcription_start_site | - | 94481  | 94481  | -765  | 3738 | AN1021  |
| 1878 | CONTIG25 | 86495  | 87054  | 1.02 | 3.02E-02 | transcription_start_site | + | 86077  | 86077  | 697   | 3761 | AN10219 |
| 1878 | CONTIG25 | 86495  | 87054  | 1.02 | 3.02E-02 | transcription_start_site | + | 85586  | 85586  | 1188  | 3760 | AN10219 |
| 2142 | CONTIG25 | 85520  | 86391  | 0.84 | 7.38E-02 | transcription_start_site | + | 86077  | 86077  | -121  | 3761 | AN10219 |
| 2142 | CONTIG25 | 85520  | 86391  | 0.84 | 7.38E-02 | transcription_start_site | + | 85586  | 85586  | 369   | 3760 | AN10219 |
| 2264 | CONTIG25 | 84830  | 85337  | 0.72 | 1.97E-01 | transcription_start_site | + | 85586  | 85586  | -502  | 3760 | AN10219 |
| 2264 | CONTIG25 | 84830  | 85337  | 0.72 | 1.97E-01 | transcription_start_site | + | 86077  | 86077  | -993  | 3761 | AN10219 |
| 2018 | CONTIG15 | 95102  | 95391  | 0.93 | 9.60E-02 | transcription_start_site | + | 95400  | 95400  | -153  | 3762 | AN1022  |
| 2018 | CONTIG15 | 95102  | 95391  | 0.93 | 9.60E-02 | transcription_start_site | + | 95911  | 95911  | -664  | 3763 | AN1022  |
| 2018 | CONTIG15 | 95102  | 95391  | 0.93 | 9.60E-02 | transcription_start_site | + | 96020  | 96020  | -773  | 3764 | AN1022  |
| 616  | CONTIG26 | 99695  | 100044 | 2.17 | 7.70E-03 | transcription_start_site | + | 100033 | 100033 | -163  | 3765 | AN10220 |
| 616  | CONTIG26 | 99695  | 100044 | 2.17 | 7.70E-03 | transcription_start_site | + | 100433 | 100433 | -563  | 3766 | AN10220 |
| 1755 | CONTIG26 | 198614 | 198968 | 1.1  | 9.90E-02 | transcription_start_site | - | 195005 | 195005 | -3786 | 3767 | AN10221 |
| 1755 | CONTIG26 | 198614 | 198968 | 1.1  | 9.90E-02 | transcription_start_site | - | 194231 | 194231 | -4560 | 3768 | AN10221 |
| 823  | CONTIG26 | 317117 | 317452 | 1.91 | 1.54E-02 | transcription_start_site | + | 316138 | 316138 | 1146  | 3776 | AN10223 |
| 616  | CONTIG26 | 99695  | 100044 | 2.17 | 7.70E-03 | transcription_start_site | + | 101736 | 101736 | -1866 | 3777 | AN10224 |
| 1755 | CONTIG26 | 198614 | 198968 | 1.1  | 9.90E-02 | transcription_start_site | - | 198528 | 198528 | -263  | 3778 | AN10225 |



|      |          |        |        |      |          |                          |   |        |        |       |      |         |
|------|----------|--------|--------|------|----------|--------------------------|---|--------|--------|-------|------|---------|
| 1755 | CONTIG26 | 198614 | 198968 | 1.1  | 9.90E-02 | transcription_start_site | - | 197293 | 197293 | -1498 | 3779 | AN10225 |
| 823  | CONTIG26 | 317117 | 317452 | 1.91 | 1.54E-02 | transcription_start_site | + | 317984 | 317984 | -699  | 3782 | AN10227 |
| 2018 | CONTIG15 | 95102  | 95391  | 0.93 | 9.60E-02 | transcription_start_site | + | 96718  | 96718  | -1471 | 3791 | AN1023  |
| 2018 | CONTIG15 | 95102  | 95391  | 0.93 | 9.60E-02 | transcription_start_site | + | 97032  | 97032  | -1785 | 3792 | AN1023  |
| 2018 | CONTIG15 | 95102  | 95391  | 0.93 | 9.60E-02 | transcription_start_site | + | 97331  | 97331  | -2084 | 3793 | AN1023  |
| 1704 | CONTIG27 | 40667  | 41016  | 1.13 | 3.34E-02 | transcription_start_site | + | 42956  | 42956  | -2114 | 3794 | AN10230 |
| 1704 | CONTIG27 | 40667  | 41016  | 1.13 | 3.34E-02 | transcription_start_site | + | 43112  | 43112  | -2270 | 3795 | AN10230 |
| 1704 | CONTIG27 | 40667  | 41016  | 1.13 | 3.34E-02 | transcription_start_site | + | 43668  | 43668  | -2826 | 3796 | AN10230 |
| 2232 | CONTIG27 | 43592  | 44605  | 0.76 | 9.90E-02 | transcription_start_site | + | 43668  | 43668  | 430   | 3796 | AN10230 |
| 2232 | CONTIG27 | 43592  | 44605  | 0.76 | 9.90E-02 | transcription_start_site | + | 43112  | 43112  | 986   | 3795 | AN10230 |
| 2232 | CONTIG27 | 43592  | 44605  | 0.76 | 9.90E-02 | transcription_start_site | + | 42956  | 42956  | 1142  | 3794 | AN10230 |
| 1486 | CONTIG27 | 37206  | 37491  | 1.28 | 1.80E-02 | transcription_start_site | + | 41069  | 41069  | -3720 | 3800 | AN10233 |
| 1704 | CONTIG27 | 40667  | 41016  | 1.13 | 3.34E-02 | transcription_start_site | + | 41069  | 41069  | -227  | 3800 | AN10233 |
| 1270 | CONTIG29 | 100951 | 101396 | 1.47 | 6.04E-02 | transcription_start_site | + | 106374 | 106374 | -5200 | 3801 | AN10234 |
| 1849 | CONTIG29 | 52879  | 54062  | 1.04 | 3.16E-02 | transcription_start_site | - | 51155  | 51155  | -2315 | 3822 | AN10242 |
| 1849 | CONTIG29 | 52879  | 54062  | 1.04 | 3.16E-02 | transcription_start_site | - | 50721  | 50721  | -2749 | 3823 | AN10242 |
| 333  | CONTIG29 | 276226 | 276739 | 2.56 | 0.00E+00 | transcription_start_site | + | 275269 | 275269 | 1213  | 3829 | AN10245 |
| 38   | CONTIG29 | 277956 | 279741 | 3.3  | 0.00E+00 | transcription_start_site | + | 283987 | 283987 | -5138 | 3830 | AN10246 |
| 244  | CONTIG29 | 283126 | 283494 | 2.73 | 7.63E-04 | transcription_start_site | + | 283987 | 283987 | -677  | 3830 | AN10246 |
| 1696 | CONTIG30 | 32046  | 32610  | 1.14 | 1.22E-01 | transcription_start_site | + | 37479  | 37479  | -5151 | 3834 | AN10249 |
| 470  | CONTIG30 | 69387  | 69651  | 2.36 | 2.61E-03 | transcription_start_site | - | 66934  | 66934  | -2585 | 3846 | AN10251 |
| 470  | CONTIG30 | 69387  | 69651  | 2.36 | 2.61E-03 | transcription_start_site | - | 66860  | 66860  | -2659 | 3847 | AN10251 |
| 470  | CONTIG30 | 69387  | 69651  | 2.36 | 2.61E-03 | transcription_start_site | - | 66569  | 66569  | -2950 | 3848 | AN10251 |
| 867  | CONTIG30 | 14868  | 15434  | 1.87 | 1.37E-02 | transcription_start_site | + | 19108  | 19108  | -3957 | 3852 | AN10254 |
| 867  | CONTIG30 | 14868  | 15434  | 1.87 | 1.37E-02 | transcription_start_site | + | 19323  | 19323  | -4172 | 3853 | AN10254 |
| 867  | CONTIG30 | 14868  | 15434  | 1.87 | 1.37E-02 | transcription_start_site | + | 19497  | 19497  | -4346 | 3854 | AN10254 |
| 867  | CONTIG30 | 14868  | 15434  | 1.87 | 1.37E-02 | transcription_start_site | + | 20100  | 20100  | -4949 | 3855 | AN10254 |
| 1696 | CONTIG30 | 32046  | 32610  | 1.14 | 1.22E-01 | transcription_start_site | + | 35583  | 35583  | -3255 | 3856 | AN10255 |
| 1696 | CONTIG30 | 32046  | 32610  | 1.14 | 1.22E-01 | transcription_start_site | + | 35988  | 35988  | -3660 | 3857 | AN10255 |
| 1696 | CONTIG30 | 32046  | 32610  | 1.14 | 1.22E-01 | transcription_start_site | + | 36437  | 36437  | -4109 | 3858 | AN10255 |
| 2249 | CONTIG15 | 111912 | 112191 | 0.75 | 1.97E-01 | transcription_start_site | - | 111289 | 111289 | -762  | 3873 | AN1026  |
| 2249 | CONTIG15 | 111912 | 112191 | 0.75 | 1.97E-01 | transcription_start_site | - | 110379 | 110379 | -1672 | 3874 | AN1026  |
| 946  | CONTIG34 | 86177  | 86536  | 1.77 | 7.08E-03 | transcription_start_site | + | 86622  | 86622  | -265  | 3884 | AN10265 |
| 946  | CONTIG34 | 86177  | 86536  | 1.77 | 7.08E-03 | transcription_start_site | + | 86762  | 86762  | -405  | 3885 | AN10265 |
| 946  | CONTIG34 | 86177  | 86536  | 1.77 | 7.08E-03 | transcription_start_site | + | 87490  | 87490  | -1133 | 3886 | AN10265 |
| 946  | CONTIG34 | 86177  | 86536  | 1.77 | 7.08E-03 | transcription_start_site | + | 87859  | 87859  | -1502 | 3887 | AN10265 |
| 2036 | CONTIG34 | 145126 | 145945 | 0.92 | 1.38E-01 | transcription_start_site | - | 144314 | 144314 | -1221 | 3897 | AN10268 |
| 2036 | CONTIG34 | 145126 | 145945 | 0.92 | 1.38E-01 | transcription_start_site | - | 143504 | 143504 | -2031 | 3898 | AN10268 |
| 946  | CONTIG34 | 86177  | 86536  | 1.77 | 7.08E-03 | transcription_start_site | + | 85623  | 85623  | 733   | 3900 | AN10269 |
| 2249 | CONTIG15 | 111912 | 112191 | 0.75 | 1.97E-01 | transcription_start_site | + | 111993 | 111993 | 58    | 3901 | AN1027  |
| 2249 | CONTIG15 | 111912 | 112191 | 0.75 | 1.97E-01 | transcription_start_site | + | 112252 | 112252 | -200  | 3902 | AN1027  |
| 2036 | CONTIG34 | 145126 | 145945 | 0.92 | 1.38E-01 | transcription_start_site | - | 140544 | 140544 | -4991 | 3903 | AN10270 |
| 2036 | CONTIG34 | 145126 | 145945 | 0.92 | 1.38E-01 | transcription_start_site | - | 142285 | 142285 | -3250 | 3905 | AN10271 |
| 2036 | CONTIG34 | 145126 | 145945 | 0.92 | 1.38E-01 | transcription_start_site | - | 141835 | 141835 | -3700 | 3906 | AN10271 |
| 1881 | CONTIG34 | 153086 | 154561 | 1.02 | 5.49E-02 | transcription_start_site | - | 149367 | 149367 | -4456 | 3907 | AN10272 |
| 1881 | CONTIG34 | 153086 | 154561 | 1.02 | 5.49E-02 | transcription_start_site | - | 149227 | 149227 | -4596 | 3908 | AN10272 |
| 665  | CONTIG35 | 49357  | 49790  | 2.08 | 0.00E+00 | transcription_start_site | - | 45540  | 45540  | -4033 | 3913 | AN10274 |
| 665  | CONTIG35 | 49357  | 49790  | 2.08 | 0.00E+00 | transcription_start_site | - | 45211  | 45211  | -4362 | 3914 | AN10274 |
| 665  | CONTIG35 | 49357  | 49790  | 2.08 | 0.00E+00 | transcription_start_site | - | 44890  | 44890  | -4683 | 3915 | AN10274 |
| 665  | CONTIG35 | 49357  | 49790  | 2.08 | 0.00E+00 | transcription_start_site | - | 44764  | 44764  | -4809 | 3916 | AN10274 |
| 665  | CONTIG35 | 49357  | 49790  | 2.08 | 0.00E+00 | transcription_start_site | - | 44469  | 44469  | -5104 | 3917 | AN10274 |
| 2279 | CONTIG35 | 47717  | 48051  | 0.7  | 1.54E-01 | transcription_start_site | - | 45540  | 45540  | -2344 | 3913 | AN10274 |
| 2279 | CONTIG35 | 47717  | 48051  | 0.7  | 1.54E-01 | transcription_start_site | - | 45211  | 45211  | -2673 | 3914 | AN10274 |
| 2279 | CONTIG35 | 47717  | 48051  | 0.7  | 1.54E-01 | transcription_start_site | - | 44890  | 44890  | -2994 | 3915 | AN10274 |
| 2279 | CONTIG35 | 47717  | 48051  | 0.7  | 1.54E-01 | transcription_start_site | - | 44764  | 44764  | -3120 | 3916 | AN10274 |
| 2279 | CONTIG35 | 47717  | 48051  | 0.7  | 1.54E-01 | transcription_start_site | - | 44469  | 44469  | -3415 | 3917 | AN10274 |
| 2279 | CONTIG35 | 47717  | 48051  | 0.7  | 1.54E-01 | transcription_start_site | - | 44340  | 44340  | -3544 | 3918 | AN10274 |

|      |          |        |        |      |          |                          |   |        |        |       |      |         |
|------|----------|--------|--------|------|----------|--------------------------|---|--------|--------|-------|------|---------|
| 2279 | CONTIG35 | 47717  | 48051  | 0.7  | 1.54E-01 | transcription_start_site | - | 43452  | 43452  | -4432 | 3919 | AN10277 |
| 245  | CONTIG38 | 102467 | 102806 | 2.72 | 0.00E+00 | transcription_start_site | - | 101902 | 101902 | -734  | 3947 | AN10285 |
| 638  | CONTIG38 | 194491 | 195290 | 2.12 | 2.06E-04 | transcription_start_site | - | 194502 | 194502 | -388  | 3951 | AN10287 |
| 638  | CONTIG38 | 194491 | 195290 | 2.12 | 2.06E-04 | transcription_start_site | - | 193910 | 193910 | -980  | 3952 | AN10287 |
| 638  | CONTIG38 | 194491 | 195290 | 2.12 | 2.06E-04 | transcription_start_site | - | 193579 | 193579 | -1311 | 3953 | AN10287 |
| 638  | CONTIG38 | 194491 | 195290 | 2.12 | 2.06E-04 | transcription_start_site | + | 197679 | 197679 | -2788 | 3954 | AN10288 |
| 638  | CONTIG38 | 194491 | 195290 | 2.12 | 2.06E-04 | transcription_start_site | + | 197918 | 197918 | -3027 | 3955 | AN10288 |
| 245  | CONTIG38 | 102467 | 102806 | 2.72 | 0.00E+00 | transcription_start_site | - | 97550  | 97550  | -5086 | 3962 | AN10290 |
| 638  | CONTIG38 | 194491 | 195290 | 2.12 | 2.06E-04 | transcription_start_site | - | 195180 | 195180 | 289   | 3973 | AN10293 |
| 638  | CONTIG38 | 194491 | 195290 | 2.12 | 2.06E-04 | transcription_start_site | - | 195815 | 195815 | 924   | 3972 | AN10293 |
| 638  | CONTIG38 | 194491 | 195290 | 2.12 | 2.06E-04 | transcription_start_site | - | 196176 | 196176 | 1285  | 3971 | AN10293 |
| 638  | CONTIG38 | 194491 | 195290 | 2.12 | 2.06E-04 | transcription_start_site | + | 199372 | 199372 | -4481 | 3974 | AN10294 |
| 638  | CONTIG38 | 194491 | 195290 | 2.12 | 2.06E-04 | transcription_start_site | + | 199555 | 199555 | -4664 | 3975 | AN10294 |
| 1624 | CONTIG39 | 167188 | 167701 | 1.19 | 9.60E-02 | transcription_start_site | - | 164415 | 164415 | -3029 | 3980 | AN10297 |
| 1624 | CONTIG39 | 167188 | 167701 | 1.19 | 9.60E-02 | transcription_start_site | - | 163305 | 163305 | -4139 | 3981 | AN10297 |
| 1624 | CONTIG39 | 167188 | 167701 | 1.19 | 9.60E-02 | transcription_start_site | - | 162249 | 162249 | -5195 | 3982 | AN10297 |
| 1700 | CONTIG40 | 123530 | 123819 | 1.14 | 1.54E-01 | transcription_start_site | - | 123118 | 123118 | -556  | 4016 | AN10306 |
| 1700 | CONTIG40 | 123530 | 123819 | 1.14 | 1.54E-01 | transcription_start_site | - | 122828 | 122828 | -846  | 4017 | AN10306 |
| 892  | CONTIG40 | 27161  | 27515  | 1.84 | 2.29E-02 | transcription_start_site | - | 27253  | 27253  | -85   | 4018 | AN10307 |
| 892  | CONTIG40 | 27161  | 27515  | 1.84 | 2.29E-02 | transcription_start_site | - | 26997  | 26997  | -341  | 4019 | AN10307 |
| 1700 | CONTIG40 | 123530 | 123819 | 1.14 | 1.54E-01 | transcription_start_site | - | 121472 | 121472 | -2202 | 4023 | AN10309 |
| 1700 | CONTIG40 | 123530 | 123819 | 1.14 | 1.54E-01 | transcription_start_site | - | 121202 | 121202 | -2472 | 4024 | AN10309 |
| 187  | CONTIG41 | 456    | 730    | 2.86 | 4.01E-03 | transcription_start_site | + | 43     | 43     | 550   | 4037 | AN10314 |
| 417  | CONTIG43 | 49067  | 49481  | 2.42 | 0.00E+00 | transcription_start_site | + | 50588  | 50588  | -1314 | 4044 | AN10318 |
| 417  | CONTIG43 | 49067  | 49481  | 2.42 | 0.00E+00 | transcription_start_site | + | 50962  | 50962  | -1688 | 4045 | AN10318 |
| 417  | CONTIG43 | 49067  | 49481  | 2.42 | 0.00E+00 | transcription_start_site | + | 51373  | 51373  | -2099 | 4058 | AN10323 |
| 417  | CONTIG43 | 49067  | 49481  | 2.42 | 0.00E+00 | transcription_start_site | + | 51758  | 51758  | -2484 | 4059 | AN10323 |
| 417  | CONTIG43 | 49067  | 49481  | 2.42 | 0.00E+00 | transcription_start_site | + | 51880  | 51880  | -2606 | 4060 | AN10323 |
| 494  | CONTIG43 | 115369 | 115853 | 2.32 | 0.00E+00 | transcription_start_site | + | 120141 | 120141 | -4530 | 4065 | AN10325 |
| 921  | CONTIG45 | 43293  | 43702  | 1.8  | 0.00E+00 | transcription_start_site | + | 44020  | 44020  | -522  | 4070 | AN10329 |
| 1581 | CONTIG45 | 39985  | 40487  | 1.21 | 9.96E-03 | transcription_start_site | + | 44020  | 44020  | -3784 | 4070 | AN10329 |
| 921  | CONTIG45 | 43293  | 43702  | 1.8  | 0.00E+00 | transcription_start_site | + | 45428  | 45428  | -1930 | 4074 | AN10330 |
| 921  | CONTIG45 | 43293  | 43702  | 1.8  | 0.00E+00 | transcription_start_site | + | 45578  | 45578  | -2080 | 4075 | AN10330 |
| 921  | CONTIG45 | 43293  | 43702  | 1.8  | 0.00E+00 | transcription_start_site | + | 45700  | 45700  | -2202 | 4076 | AN10330 |
| 921  | CONTIG45 | 43293  | 43702  | 1.8  | 0.00E+00 | transcription_start_site | + | 45924  | 45924  | -2426 | 4077 | AN10330 |
| 921  | CONTIG45 | 43293  | 43702  | 1.8  | 0.00E+00 | transcription_start_site | + | 46085  | 46085  | -2587 | 4078 | AN10330 |
| 1581 | CONTIG45 | 39985  | 40487  | 1.21 | 9.96E-03 | transcription_start_site | + | 45428  | 45428  | -5192 | 4074 | AN10330 |
| 467  | CONTIG46 | 13587  | 13861  | 2.36 | 1.09E-03 | transcription_start_site | + | 15572  | 15572  | -1848 | 4079 | AN10331 |
| 467  | CONTIG46 | 13587  | 13861  | 2.36 | 1.09E-03 | transcription_start_site | + | 15818  | 15818  | -2094 | 4080 | AN10331 |
| 467  | CONTIG46 | 13587  | 13861  | 2.36 | 1.09E-03 | transcription_start_site | + | 16646  | 16646  | -2922 | 4081 | AN10331 |
| 467  | CONTIG46 | 13587  | 13861  | 2.36 | 1.09E-03 | transcription_start_site | + | 16759  | 16759  | -3035 | 4082 | AN10331 |
| 467  | CONTIG46 | 13587  | 13861  | 2.36 | 1.09E-03 | transcription_start_site | + | 17007  | 17007  | -3283 | 4083 | AN10331 |
| 467  | CONTIG46 | 13587  | 13861  | 2.36 | 1.09E-03 | transcription_start_site | + | 17228  | 17228  | -3504 | 4084 | AN10331 |
| 467  | CONTIG46 | 13587  | 13861  | 2.36 | 1.09E-03 | transcription_start_site | + | 17425  | 17425  | -3701 | 4085 | AN10331 |
| 467  | CONTIG46 | 13587  | 13861  | 2.36 | 1.09E-03 | transcription_start_site | + | 13784  | 13784  | -60   | 4086 | AN10332 |
| 467  | CONTIG46 | 13587  | 13861  | 2.36 | 1.09E-03 | transcription_start_site | + | 14296  | 14296  | -572  | 4087 | AN10332 |
| 467  | CONTIG46 | 13587  | 13861  | 2.36 | 1.09E-03 | transcription_start_site | + | 15103  | 15103  | -1379 | 4088 | AN10332 |
| 488  | CONTIG46 | 8626   | 9127   | 2.33 | 7.31E-04 | transcription_start_site | + | 13784  | 13784  | -4907 | 4086 | AN10332 |
| 2205 | CONTIG49 | 51378  | 52117  | 0.79 | 1.54E-01 | transcription_start_site | - | 51138  | 51138  | -609  | 4091 | AN10335 |
| 2205 | CONTIG49 | 51378  | 52117  | 0.79 | 1.54E-01 | transcription_start_site | - | 51024  | 51024  | -723  | 4092 | AN10335 |
| 2205 | CONTIG49 | 51378  | 52117  | 0.79 | 1.54E-01 | transcription_start_site | - | 50725  | 50725  | -1022 | 4093 | AN10335 |
| 1488 | CONTIG49 | 70518  | 70927  | 1.28 | 2.29E-02 | transcription_start_site | - | 70566  | 70566  | -156  | 4094 | AN10336 |
| 1488 | CONTIG49 | 70518  | 70927  | 1.28 | 2.29E-02 | transcription_start_site | - | 70472  | 70472  | -250  | 4095 | AN10336 |
| 2280 | CONTIG49 | 75376  | 75955  | 0.7  | 1.57E-01 | transcription_start_site | - | 70566  | 70566  | -5099 | 4094 | AN10336 |
| 2280 | CONTIG49 | 75376  | 75955  | 0.7  | 1.57E-01 | transcription_start_site | - | 70472  | 70472  | -5193 | 4095 | AN10336 |
| 2205 | CONTIG49 | 51378  | 52117  | 0.79 | 1.54E-01 | transcription_start_site | - | 49330  | 49330  | -2417 | 4099 | AN10338 |
| 2205 | CONTIG49 | 51378  | 52117  | 0.79 | 1.54E-01 | transcription_start_site | - | 48953  | 48953  | -2794 | 4100 | AN10338 |

|      |          |         |         |      |          |                          |   |         |         |       |      |         |
|------|----------|---------|---------|------|----------|--------------------------|---|---------|---------|-------|------|---------|
| 2205 | CONTIG49 | 51378   | 52117   | 0.79 | 1.54E-01 | transcription_start_site | - | 48677   | 48677   | -3070 | 4101 | AN10338 |
| 1488 | CONTIG49 | 70518   | 70927   | 1.28 | 2.29E-02 | transcription_start_site | - | 68742   | 68742   | -1980 | 4102 | AN10339 |
| 1488 | CONTIG49 | 70518   | 70927   | 1.28 | 2.29E-02 | transcription_start_site | - | 68622   | 68622   | -2100 | 4103 | AN10339 |
| 2173 | CONTIG49 | 1671    | 2075    | 0.82 | 1.38E-01 | transcription_start_site | + | 1594    | 1594    | 279   | 4110 | AN10341 |
| 1262 | CONTIG49 | 92404   | 92775   | 1.47 | 1.06E-02 | transcription_start_site | + | 96152   | 96152   | -3562 | 4111 | AN10342 |
| 1167 | CONTIG51 | 399757  | 400181  | 1.56 | 1.83E-02 | transcription_start_site | - | 399365  | 399365  | -604  | 4139 | AN10350 |
| 1167 | CONTIG51 | 399757  | 400181  | 1.56 | 1.83E-02 | transcription_start_site | - | 399221  | 399221  | -748  | 4140 | AN10350 |
| 1167 | CONTIG51 | 399757  | 400181  | 1.56 | 1.83E-02 | transcription_start_site | - | 398931  | 398931  | -1038 | 4141 | AN10350 |
| 1167 | CONTIG51 | 399757  | 400181  | 1.56 | 1.83E-02 | transcription_start_site | - | 398574  | 398574  | -1395 | 4142 | AN10350 |
| 1167 | CONTIG51 | 399757  | 400181  | 1.56 | 1.83E-02 | transcription_start_site | - | 397882  | 397882  | -2087 | 4143 | AN10350 |
| 1167 | CONTIG51 | 399757  | 400181  | 1.56 | 1.83E-02 | transcription_start_site | - | 397738  | 397738  | -2231 | 4144 | AN10350 |
| 1167 | CONTIG51 | 399757  | 400181  | 1.56 | 1.83E-02 | transcription_start_site | - | 396550  | 396550  | -3419 | 4145 | AN10350 |
| 217  | CONTIG51 | 954983  | 955342  | 2.79 | 2.26E-04 | transcription_start_site | + | 958477  | 958477  | -3314 | 4157 | AN10354 |
| 217  | CONTIG51 | 954983  | 955342  | 2.79 | 2.26E-04 | transcription_start_site | + | 958675  | 958675  | -3512 | 4158 | AN10354 |
| 217  | CONTIG51 | 954983  | 955342  | 2.79 | 2.26E-04 | transcription_start_site | + | 958937  | 958937  | -3774 | 4159 | AN10354 |
| 180  | CONTIG51 | 967663  | 968242  | 2.88 | 2.69E-04 | transcription_start_site | - | 967007  | 967007  | -945  | 4160 | AN10355 |
| 738  | CONTIG51 | 1030888 | 1031155 | 2.01 | 9.96E-03 | transcription_start_site | - | 1030316 | 1030316 | -705  | 4165 | AN10357 |
| 738  | CONTIG51 | 1030888 | 1031155 | 2.01 | 9.96E-03 | transcription_start_site | - | 1030096 | 1030096 | -925  | 4166 | AN10357 |
| 738  | CONTIG51 | 1030888 | 1031155 | 2.01 | 9.96E-03 | transcription_start_site | - | 1029910 | 1029910 | -1111 | 4167 | AN10357 |
| 738  | CONTIG51 | 1030888 | 1031155 | 2.01 | 9.96E-03 | transcription_start_site | - | 1029466 | 1029466 | -1555 | 4168 | AN10357 |
| 738  | CONTIG51 | 1030888 | 1031155 | 2.01 | 9.96E-03 | transcription_start_site | - | 1029338 | 1029338 | -1683 | 4169 | AN10357 |
| 774  | CONTIG51 | 1032243 | 1032680 | 1.97 | 4.22E-03 | transcription_start_site | - | 1030316 | 1030316 | -2145 | 4165 | AN10357 |
| 774  | CONTIG51 | 1032243 | 1032680 | 1.97 | 4.22E-03 | transcription_start_site | - | 1030096 | 1030096 | -2365 | 4166 | AN10357 |
| 774  | CONTIG51 | 1032243 | 1032680 | 1.97 | 4.22E-03 | transcription_start_site | - | 1029910 | 1029910 | -2551 | 4167 | AN10357 |
| 774  | CONTIG51 | 1032243 | 1032680 | 1.97 | 4.22E-03 | transcription_start_site | - | 1029466 | 1029466 | -2995 | 4168 | AN10357 |
| 774  | CONTIG51 | 1032243 | 1032680 | 1.97 | 4.22E-03 | transcription_start_site | - | 1029338 | 1029338 | -3123 | 4169 | AN10357 |
| 1431 | CONTIG51 | 1031183 | 1031977 | 1.32 | 2.88E-02 | transcription_start_site | - | 1030316 | 1030316 | -1264 | 4165 | AN10357 |
| 1431 | CONTIG51 | 1031183 | 1031977 | 1.32 | 2.88E-02 | transcription_start_site | - | 1030096 | 1030096 | -1484 | 4166 | AN10357 |
| 1431 | CONTIG51 | 1031183 | 1031977 | 1.32 | 2.88E-02 | transcription_start_site | - | 1029910 | 1029910 | -1670 | 4167 | AN10357 |
| 1431 | CONTIG51 | 1031183 | 1031977 | 1.32 | 2.88E-02 | transcription_start_site | - | 1029466 | 1029466 | -2114 | 4168 | AN10357 |
| 1431 | CONTIG51 | 1031183 | 1031977 | 1.32 | 2.88E-02 | transcription_start_site | - | 1029338 | 1029338 | -2242 | 4169 | AN10357 |
| 1978 | CONTIG51 | 1032993 | 1034304 | 0.95 | 3.10E-02 | transcription_start_site | - | 1030316 | 1030316 | -3332 | 4165 | AN10357 |
| 1978 | CONTIG51 | 1032993 | 1034304 | 0.95 | 3.10E-02 | transcription_start_site | - | 1030096 | 1030096 | -3552 | 4166 | AN10357 |
| 1978 | CONTIG51 | 1032993 | 1034304 | 0.95 | 3.10E-02 | transcription_start_site | - | 1029910 | 1029910 | -3738 | 4167 | AN10357 |
| 1978 | CONTIG51 | 1032993 | 1034304 | 0.95 | 3.10E-02 | transcription_start_site | - | 1029466 | 1029466 | -4182 | 4168 | AN10357 |
| 1978 | CONTIG51 | 1032993 | 1034304 | 0.95 | 3.10E-02 | transcription_start_site | - | 1029338 | 1029338 | -4310 | 4169 | AN10357 |
| 1119 | CONTIG15 | 153905  | 155679  | 1.59 | 0.00E+00 | transcription_start_site | - | 150464  | 150464  | -4328 | 4176 | AN1036  |
| 1119 | CONTIG15 | 153905  | 155679  | 1.59 | 0.00E+00 | transcription_start_site | - | 150023  | 150023  | -4769 | 4177 | AN1036  |
| 1119 | CONTIG15 | 153905  | 155679  | 1.59 | 0.00E+00 | transcription_start_site | - | 149923  | 149923  | -4869 | 4178 | AN1036  |
| 1167 | CONTIG51 | 399757  | 400181  | 1.56 | 1.83E-02 | transcription_start_site | - | 395646  | 395646  | -4323 | 4181 | AN10360 |
| 1167 | CONTIG51 | 399757  | 400181  | 1.56 | 1.83E-02 | transcription_start_site | - | 395449  | 395449  | -4520 | 4182 | AN10360 |
| 1748 | CONTIG51 | 392337  | 392623  | 1.11 | 1.38E-01 | transcription_start_site | - | 392334  | 392334  | -146  | 4187 | AN10362 |
| 1748 | CONTIG51 | 392337  | 392623  | 1.11 | 1.38E-01 | transcription_start_site | - | 392040  | 392040  | -440  | 4188 | AN10362 |
| 1748 | CONTIG51 | 392337  | 392623  | 1.11 | 1.38E-01 | transcription_start_site | - | 391818  | 391818  | -662  | 4189 | AN10362 |
| 217  | CONTIG51 | 954983  | 955342  | 2.79 | 2.26E-04 | transcription_start_site | + | 959435  | 959435  | -4272 | 4193 | AN10365 |
| 217  | CONTIG51 | 954983  | 955342  | 2.79 | 2.26E-04 | transcription_start_site | + | 959720  | 959720  | -4557 | 4194 | AN10365 |
| 738  | CONTIG51 | 1030888 | 1031155 | 2.01 | 9.96E-03 | transcription_start_site | - | 1028178 | 1028178 | -2843 | 4196 | AN10367 |
| 774  | CONTIG51 | 1032243 | 1032680 | 1.97 | 4.22E-03 | transcription_start_site | - | 1028178 | 1028178 | -4283 | 4196 | AN10367 |
| 1431 | CONTIG51 | 1031183 | 1031977 | 1.32 | 2.88E-02 | transcription_start_site | - | 1028178 | 1028178 | -3402 | 4196 | AN10367 |
| 1978 | CONTIG51 | 1032993 | 1034304 | 0.95 | 3.10E-02 | transcription_start_site | - | 1028178 | 1028178 | -5470 | 4196 | AN10367 |
| 216  | CONTIG51 | 566044  | 566393  | 2.79 | 2.26E-04 | transcription_start_site | + | 566466  | 566466  | -247  | 4201 | AN10369 |
| 216  | CONTIG51 | 566044  | 566393  | 2.79 | 2.26E-04 | transcription_start_site | + | 566714  | 566714  | -495  | 4202 | AN10369 |
| 216  | CONTIG51 | 566044  | 566393  | 2.79 | 2.26E-04 | transcription_start_site | + | 566956  | 566956  | -737  | 4203 | AN10369 |
| 216  | CONTIG51 | 566044  | 566393  | 2.79 | 2.26E-04 | transcription_start_site | + | 567309  | 567309  | -1090 | 4204 | AN10369 |
| 216  | CONTIG51 | 566044  | 566393  | 2.79 | 2.26E-04 | transcription_start_site | + | 567438  | 567438  | -1219 | 4205 | AN10369 |
| 733  | CONTIG51 | 562884  | 563608  | 2.01 | 3.78E-03 | transcription_start_site | + | 566466  | 566466  | -3220 | 4201 | AN10369 |
| 733  | CONTIG51 | 562884  | 563608  | 2.01 | 3.78E-03 | transcription_start_site | + | 566714  | 566714  | -3468 | 4202 | AN10369 |

|      |          |        |        |      |          |                          |   |        |        |       |      |         |
|------|----------|--------|--------|------|----------|--------------------------|---|--------|--------|-------|------|---------|
| 733  | CONTIG51 | 562884 | 563608 | 2.01 | 3.78E-03 | transcription_start_site | + | 566956 | 566956 | -3710 | 4203 | AN10369 |
| 733  | CONTIG51 | 562884 | 563608 | 2.01 | 3.78E-03 | transcription_start_site | + | 567309 | 567309 | -4063 | 4204 | AN10369 |
| 733  | CONTIG51 | 562884 | 563608 | 2.01 | 3.78E-03 | transcription_start_site | + | 567438 | 567438 | -4192 | 4205 | AN10369 |
| 1119 | CONTIG15 | 153905 | 155679 | 1.59 | 0.00E+00 | transcription_start_site | - | 153367 | 153367 | -1425 | 4206 | AN1037  |
| 1737 | CONTIG51 | 466353 | 466853 | 1.11 | 8.54E-02 | transcription_start_site | - | 463167 | 463167 | -3436 | 4207 | AN10370 |
| 1737 | CONTIG51 | 466353 | 466853 | 1.11 | 8.54E-02 | transcription_start_site | - | 462775 | 462775 | -3828 | 4208 | AN10370 |
| 1737 | CONTIG51 | 466353 | 466853 | 1.11 | 8.54E-02 | transcription_start_site | - | 462598 | 462598 | -4005 | 4209 | AN10370 |
| 180  | CONTIG51 | 967663 | 968242 | 2.88 | 2.69E-04 | transcription_start_site | - | 964030 | 964030 | -3922 | 4222 | AN10377 |
| 180  | CONTIG51 | 967663 | 968242 | 2.88 | 2.69E-04 | transcription_start_site | - | 963711 | 963711 | -4241 | 4223 | AN10377 |
| 421  | CONTIG51 | 963903 | 964262 | 2.42 | 1.20E-03 | transcription_start_site | - | 964030 | 964030 | -52   | 4222 | AN10377 |
| 421  | CONTIG51 | 963903 | 964262 | 2.42 | 1.20E-03 | transcription_start_site | - | 963711 | 963711 | -371  | 4223 | AN10377 |
| 1141 | CONTIG52 | 49278  | 49716  | 1.58 | 3.61E-02 | transcription_start_site | + | 49797  | 49797  | -300  | 4224 | AN10378 |
| 1141 | CONTIG52 | 49278  | 49716  | 1.58 | 3.61E-02 | transcription_start_site | + | 50101  | 50101  | -604  | 4225 | AN10378 |
| 1141 | CONTIG52 | 49278  | 49716  | 1.58 | 3.61E-02 | transcription_start_site | + | 50257  | 50257  | -760  | 4226 | AN10378 |
| 1141 | CONTIG52 | 49278  | 49716  | 1.58 | 3.61E-02 | transcription_start_site | + | 50587  | 50587  | -1090 | 4227 | AN10378 |
| 512  | CONTIG52 | 65412  | 65686  | 2.3  | 1.06E-02 | transcription_start_site | - | 62947  | 62947  | -2602 | 4228 | AN10379 |
| 512  | CONTIG52 | 65412  | 65686  | 2.3  | 1.06E-02 | transcription_start_site | - | 62479  | 62479  | -3070 | 4229 | AN10379 |
| 512  | CONTIG52 | 65412  | 65686  | 2.3  | 1.06E-02 | transcription_start_site | - | 61945  | 61945  | -3604 | 4230 | AN10379 |
| 1119 | CONTIG15 | 153905 | 155679 | 1.59 | 0.00E+00 | transcription_start_site | - | 156330 | 156330 | 1538  | 4234 | AN1038  |
| 1141 | CONTIG52 | 49278  | 49716  | 1.58 | 3.61E-02 | transcription_start_site | + | 52124  | 52124  | -2627 | 4235 | AN10380 |
| 1141 | CONTIG52 | 49278  | 49716  | 1.58 | 3.61E-02 | transcription_start_site | + | 52290  | 52290  | -2793 | 4236 | AN10380 |
| 1141 | CONTIG52 | 49278  | 49716  | 1.58 | 3.61E-02 | transcription_start_site | + | 52407  | 52407  | -2910 | 4237 | AN10380 |
| 1141 | CONTIG52 | 49278  | 49716  | 1.58 | 3.61E-02 | transcription_start_site | + | 52599  | 52599  | -3102 | 4238 | AN10380 |
| 1141 | CONTIG52 | 49278  | 49716  | 1.58 | 3.61E-02 | transcription_start_site | + | 53497  | 53497  | -4000 | 4239 | AN10380 |
| 1537 | CONTIG52 | 53707  | 54141  | 1.25 | 9.90E-02 | transcription_start_site | + | 53497  | 53497  | 427   | 4239 | AN10380 |
| 512  | CONTIG52 | 65412  | 65686  | 2.3  | 1.06E-02 | transcription_start_site | - | 61583  | 61583  | -3966 | 4240 | AN10381 |
| 525  | CONTIG53 | 41496  | 41826  | 2.28 | 2.61E-03 | transcription_start_site | - | 37331  | 37331  | -4330 | 4251 | AN10386 |
| 525  | CONTIG53 | 41496  | 41826  | 2.28 | 2.61E-03 | transcription_start_site | - | 36919  | 36919  | -4742 | 4252 | AN10386 |
| 525  | CONTIG53 | 41496  | 41826  | 2.28 | 2.61E-03 | transcription_start_site | - | 36703  | 36703  | -4958 | 4253 | AN10386 |
| 209  | CONTIG55 | 8046   | 8395   | 2.8  | 0.00E+00 | transcription_start_site | - | 8089   | 8089   | -131  | 4263 | AN10389 |
| 209  | CONTIG55 | 8046   | 8395   | 2.8  | 0.00E+00 | transcription_start_site | - | 7807   | 7807   | -413  | 4264 | AN10389 |
| 209  | CONTIG55 | 8046   | 8395   | 2.8  | 0.00E+00 | transcription_start_site | - | 7528   | 7528   | -692  | 4265 | AN10389 |
| 209  | CONTIG55 | 8046   | 8395   | 2.8  | 0.00E+00 | transcription_start_site | - | 7399   | 7399   | -821  | 4266 | AN10389 |
| 209  | CONTIG55 | 8046   | 8395   | 2.8  | 0.00E+00 | transcription_start_site | - | 6719   | 6719   | -1501 | 4267 | AN10389 |
| 1811 | CONTIG15 | 165539 | 166191 | 1.06 | 3.02E-02 | transcription_start_site | - | 165050 | 165050 | -815  | 4268 | AN1039  |
| 1811 | CONTIG15 | 165539 | 166191 | 1.06 | 3.02E-02 | transcription_start_site | - | 164292 | 164292 | -1573 | 4269 | AN1039  |
| 1811 | CONTIG15 | 165539 | 166191 | 1.06 | 3.02E-02 | transcription_start_site | - | 163343 | 163343 | -2522 | 4270 | AN1039  |
| 1811 | CONTIG15 | 165539 | 166191 | 1.06 | 3.02E-02 | transcription_start_site | - | 160834 | 160834 | -5031 | 4271 | AN1039  |
| 2069 | CONTIG15 | 167344 | 167610 | 0.9  | 1.08E-01 | transcription_start_site | - | 165050 | 165050 | -2427 | 4268 | AN1039  |
| 2069 | CONTIG15 | 167344 | 167610 | 0.9  | 1.08E-01 | transcription_start_site | - | 164292 | 164292 | -3185 | 4269 | AN1039  |
| 2069 | CONTIG15 | 167344 | 167610 | 0.9  | 1.08E-01 | transcription_start_site | - | 163343 | 163343 | -4134 | 4270 | AN1039  |
| 2292 | CONTIG55 | 137327 | 137850 | 0.68 | 1.81E-01 | transcription_start_site | + | 141707 | 141707 | -4118 | 4275 | AN10391 |
| 2292 | CONTIG55 | 137327 | 137850 | 0.68 | 1.81E-01 | transcription_start_site | + | 142405 | 142405 | -4816 | 4276 | AN10391 |
| 1306 | CONTIG55 | 264692 | 265027 | 1.43 | 1.37E-02 | transcription_start_site | + | 264241 | 264241 | 618   | 4279 | AN10392 |
| 2215 | CONTIG55 | 348153 | 348577 | 0.78 | 1.76E-01 | transcription_start_site | + | 348889 | 348889 | -524  | 4286 | AN10396 |
| 2215 | CONTIG55 | 348153 | 348577 | 0.78 | 1.76E-01 | transcription_start_site | + | 349015 | 349015 | -650  | 4287 | AN10396 |
| 2215 | CONTIG55 | 348153 | 348577 | 0.78 | 1.76E-01 | transcription_start_site | + | 350121 | 350121 | -1756 | 4288 | AN10396 |
| 2215 | CONTIG55 | 348153 | 348577 | 0.78 | 1.76E-01 | transcription_start_site | + | 350351 | 350351 | -1986 | 4289 | AN10396 |
| 1306 | CONTIG55 | 264692 | 265027 | 1.43 | 1.37E-02 | transcription_start_site | + | 265119 | 265119 | -259  | 4296 | AN10399 |
| 1306 | CONTIG55 | 264692 | 265027 | 1.43 | 1.37E-02 | transcription_start_site | + | 265656 | 265656 | -796  | 4297 | AN10399 |
| 1306 | CONTIG55 | 264692 | 265027 | 1.43 | 1.37E-02 | transcription_start_site | + | 266071 | 266071 | -1211 | 4298 | AN10399 |
| 1811 | CONTIG15 | 165539 | 166191 | 1.06 | 3.02E-02 | transcription_start_site | + | 167600 | 167600 | -1735 | 4299 | AN1040  |
| 1811 | CONTIG15 | 165539 | 166191 | 1.06 | 3.02E-02 | transcription_start_site | + | 167846 | 167846 | -1981 | 4300 | AN1040  |
| 1811 | CONTIG15 | 165539 | 166191 | 1.06 | 3.02E-02 | transcription_start_site | + | 168117 | 168117 | -2252 | 4301 | AN1040  |
| 2069 | CONTIG15 | 167344 | 167610 | 0.9  | 1.08E-01 | transcription_start_site | + | 167600 | 167600 | -123  | 4299 | AN1040  |
| 2069 | CONTIG15 | 167344 | 167610 | 0.9  | 1.08E-01 | transcription_start_site | + | 167846 | 167846 | -369  | 4300 | AN1040  |
| 2069 | CONTIG15 | 167344 | 167610 | 0.9  | 1.08E-01 | transcription_start_site | + | 168117 | 168117 | -640  | 4301 | AN1040  |

|      |          |        |        |      |          |                          |   |        |        |       |      |         |
|------|----------|--------|--------|------|----------|--------------------------|---|--------|--------|-------|------|---------|
| 2215 | CONTIG55 | 348153 | 348577 | 0.78 | 1.76E-01 | transcription_start_site | + | 351010 | 351010 | -2645 | 4306 | AN10401 |
| 2215 | CONTIG55 | 348153 | 348577 | 0.78 | 1.76E-01 | transcription_start_site | + | 351173 | 351173 | -2808 | 4307 | AN10401 |
| 209  | CONTIG55 | 8046   | 8395   | 2.8  | 0.00E+00 | transcription_start_site | - | 8455   | 8455   | 234   | 4311 | AN10402 |
| 209  | CONTIG55 | 8046   | 8395   | 2.8  | 0.00E+00 | transcription_start_site | - | 8736   | 8736   | 515   | 4310 | AN10402 |
| 209  | CONTIG55 | 8046   | 8395   | 2.8  | 0.00E+00 | transcription_start_site | - | 9004   | 9004   | 783   | 4309 | AN10402 |
| 1811 | CONTIG15 | 165539 | 166191 | 1.06 | 3.02E-02 | transcription_start_site | + | 170873 | 170873 | -5008 | 4327 | AN1041  |
| 2069 | CONTIG15 | 167344 | 167610 | 0.9  | 1.08E-01 | transcription_start_site | + | 170873 | 170873 | -3396 | 4327 | AN1041  |
| 2069 | CONTIG15 | 167344 | 167610 | 0.9  | 1.08E-01 | transcription_start_site | + | 171244 | 171244 | -3767 | 4328 | AN1041  |
| 953  | CONTIG57 | 24766  | 25273  | 1.77 | 6.04E-02 | transcription_start_site | - | 20517  | 20517  | -4502 | 4329 | AN10410 |
| 953  | CONTIG57 | 24766  | 25273  | 1.77 | 6.04E-02 | transcription_start_site | - | 20153  | 20153  | -4866 | 4330 | AN10410 |
| 2299 | CONTIG58 | 6621   | 6897   | 0.67 | 1.22E-01 | transcription_start_site | - | 6447   | 6447   | -312  | 4336 | AN10413 |
| 2314 | CONTIG58 | 9451   | 9957   | 0.65 | 1.38E-01 | transcription_start_site | - | 6447   | 6447   | -3257 | 4336 | AN10413 |
| 2314 | CONTIG58 | 9451   | 9957   | 0.65 | 1.38E-01 | transcription_start_site | - | 10661  | 10661  | 957   | 4342 | AN10414 |
| 2314 | CONTIG58 | 9451   | 9957   | 0.65 | 1.38E-01 | transcription_start_site | - | 10890  | 10890  | 1186  | 4341 | AN10414 |
| 2314 | CONTIG58 | 9451   | 9957   | 0.65 | 1.38E-01 | transcription_start_site | - | 9659   | 9659   | -45   | 4357 | AN10416 |
| 2314 | CONTIG58 | 9451   | 9957   | 0.65 | 1.38E-01 | transcription_start_site | - | 9465   | 9465   | -239  | 4358 | AN10416 |
| 2314 | CONTIG58 | 9451   | 9957   | 0.65 | 1.38E-01 | transcription_start_site | - | 9093   | 9093   | -611  | 4359 | AN10416 |
| 2299 | CONTIG58 | 6621   | 6897   | 0.67 | 1.22E-01 | transcription_start_site | - | 7745   | 7745   | 986   | 4366 | AN10418 |
| 2314 | CONTIG58 | 9451   | 9957   | 0.65 | 1.38E-01 | transcription_start_site | - | 8384   | 8384   | -1320 | 4364 | AN10418 |
| 2314 | CONTIG58 | 9451   | 9957   | 0.65 | 1.38E-01 | transcription_start_site | - | 8187   | 8187   | -1517 | 4365 | AN10418 |
| 2314 | CONTIG58 | 9451   | 9957   | 0.65 | 1.38E-01 | transcription_start_site | - | 7745   | 7745   | -1959 | 4366 | AN10418 |
| 2312 | CONTIG59 | 127895 | 128694 | 0.65 | 9.90E-02 | transcription_start_site | + | 127031 | 127031 | 1263  | 4367 | AN10419 |
| 1952 | CONTIG59 | 137637 | 138051 | 0.97 | 3.34E-02 | transcription_start_site | + | 142710 | 142710 | -4866 | 4370 | AN10420 |
| 1952 | CONTIG59 | 137637 | 138051 | 0.97 | 3.34E-02 | transcription_start_site | + | 142826 | 142826 | -4982 | 4371 | AN10420 |
| 1953 | CONTIG59 | 142502 | 142791 | 0.97 | 3.34E-02 | transcription_start_site | + | 142710 | 142710 | -63   | 4370 | AN10420 |
| 1953 | CONTIG59 | 142502 | 142791 | 0.97 | 3.34E-02 | transcription_start_site | + | 142826 | 142826 | -179  | 4371 | AN10420 |
| 1953 | CONTIG59 | 142502 | 142791 | 0.97 | 3.34E-02 | transcription_start_site | + | 143293 | 143293 | -646  | 4372 | AN10420 |
| 1405 | CONTIG59 | 129620 | 130042 | 1.34 | 5.08E-03 | transcription_start_site | + | 129103 | 129103 | 728   | 4377 | AN10421 |
| 1405 | CONTIG59 | 129620 | 130042 | 1.34 | 5.08E-03 | transcription_start_site | + | 128706 | 128706 | 1125  | 4376 | AN10421 |
| 2312 | CONTIG59 | 127895 | 128694 | 0.65 | 9.90E-02 | transcription_start_site | + | 128226 | 128226 | 68    | 4373 | AN10421 |
| 2312 | CONTIG59 | 127895 | 128694 | 0.65 | 9.90E-02 | transcription_start_site | + | 128446 | 128446 | -151  | 4374 | AN10421 |
| 2312 | CONTIG59 | 127895 | 128694 | 0.65 | 9.90E-02 | transcription_start_site | + | 128525 | 128525 | -230  | 4375 | AN10421 |
| 2312 | CONTIG59 | 127895 | 128694 | 0.65 | 9.90E-02 | transcription_start_site | + | 128706 | 128706 | -411  | 4376 | AN10421 |
| 2312 | CONTIG59 | 127895 | 128694 | 0.65 | 9.90E-02 | transcription_start_site | + | 129103 | 129103 | -808  | 4377 | AN10421 |
| 1405 | CONTIG59 | 129620 | 130042 | 1.34 | 5.08E-03 | transcription_start_site | + | 130052 | 130052 | -221  | 4378 | AN10422 |
| 1900 | CONTIG59 | 130580 | 131829 | 1    | 1.44E-02 | transcription_start_site | + | 130052 | 130052 | 1152  | 4378 | AN10422 |
| 2312 | CONTIG59 | 127895 | 128694 | 0.65 | 9.90E-02 | transcription_start_site | + | 130052 | 130052 | -1757 | 4378 | AN10422 |
| 1953 | CONTIG59 | 142502 | 142791 | 0.97 | 3.34E-02 | transcription_start_site | + | 144996 | 144996 | -2349 | 4379 | AN10423 |
| 1953 | CONTIG59 | 142502 | 142791 | 0.97 | 3.34E-02 | transcription_start_site | + | 145788 | 145788 | -3141 | 4380 | AN10423 |
| 1953 | CONTIG59 | 142502 | 142791 | 0.97 | 3.34E-02 | transcription_start_site | + | 146291 | 146291 | -3644 | 4381 | AN10423 |
| 2311 | CONTIG60 | 55361  | 55795  | 0.65 | 8.54E-02 | transcription_start_site | + | 58382  | 58382  | -2804 | 4396 | AN10427 |
| 2311 | CONTIG60 | 55361  | 55795  | 0.65 | 8.54E-02 | transcription_start_site | + | 58858  | 58858  | -3280 | 4397 | AN10427 |
| 1009 | CONTIG61 | 549526 | 549810 | 1.71 | 1.54E-02 | transcription_start_site | - | 547675 | 547675 | -1993 | 4457 | AN10441 |
| 1009 | CONTIG61 | 549526 | 549810 | 1.71 | 1.54E-02 | transcription_start_site | - | 547299 | 547299 | -2369 | 4458 | AN10441 |
| 1206 | CONTIG61 | 650120 | 650548 | 1.52 | 3.01E-02 | transcription_start_site | + | 652367 | 652367 | -2033 | 4459 | AN10442 |
| 1169 | CONTIG61 | 718502 | 718791 | 1.56 | 2.63E-02 | transcription_start_site | + | 720776 | 720776 | -2129 | 4469 | AN10445 |
| 1169 | CONTIG61 | 718502 | 718791 | 1.56 | 2.63E-02 | transcription_start_site | + | 720927 | 720927 | -2280 | 4470 | AN10445 |
| 1169 | CONTIG61 | 718502 | 718791 | 1.56 | 2.63E-02 | transcription_start_site | + | 721128 | 721128 | -2481 | 4471 | AN10445 |
| 1169 | CONTIG61 | 718502 | 718791 | 1.56 | 2.63E-02 | transcription_start_site | + | 721272 | 721272 | -2625 | 4472 | AN10445 |
| 2060 | CONTIG61 | 721954 | 722453 | 0.91 | 1.97E-01 | transcription_start_site | + | 721272 | 721272 | 931   | 4472 | AN10445 |
| 2060 | CONTIG61 | 721954 | 722453 | 0.91 | 1.97E-01 | transcription_start_site | + | 721128 | 721128 | 1075  | 4471 | AN10445 |
| 1153 | CONTIG16 | 7728   | 8232   | 1.57 | 2.30E-02 | transcription_start_site | - | 3909   | 3909   | -4071 | 4485 | AN1045  |
| 1153 | CONTIG16 | 7728   | 8232   | 1.57 | 2.30E-02 | transcription_start_site | - | 2771   | 2771   | -5209 | 4486 | AN1045  |
| 474  | CONTIG61 | 699092 | 699366 | 2.35 | 1.45E-03 | transcription_start_site | - | 699027 | 699027 | -202  | 4509 | AN10457 |
| 1642 | CONTIG61 | 698027 | 698611 | 1.18 | 8.63E-02 | transcription_start_site | - | 699027 | 699027 | 708   | 4509 | AN10457 |
| 202  | CONTIG61 | 407491 | 407918 | 2.81 | 0.00E+00 | transcription_start_site | + | 407083 | 407083 | 621   | 4510 | AN10458 |
| 1008 | CONTIG61 | 450991 | 451340 | 1.71 | 1.54E-02 | transcription_start_site | + | 451413 | 451413 | -247  | 4511 | AN10459 |

|      |          |        |        |      |          |                          |   |        |        |       |      |         |
|------|----------|--------|--------|------|----------|--------------------------|---|--------|--------|-------|------|---------|
| 1008 | CONTIG61 | 450991 | 451340 | 1.71 | 1.54E-02 | transcription_start_site | + | 451550 | 451550 | -384  | 4512 | AN10459 |
| 1008 | CONTIG61 | 450991 | 451340 | 1.71 | 1.54E-02 | transcription_start_site | + | 451665 | 451665 | -499  | 4513 | AN10459 |
| 1008 | CONTIG61 | 450991 | 451340 | 1.71 | 1.54E-02 | transcription_start_site | + | 451856 | 451856 | -690  | 4514 | AN10459 |
| 1008 | CONTIG61 | 450991 | 451340 | 1.71 | 1.54E-02 | transcription_start_site | + | 453096 | 453096 | -1930 | 4515 | AN10459 |
| 226  | CONTIG61 | 812564 | 812913 | 2.77 | 0.00E+00 | transcription_start_site | + | 815758 | 815758 | -3019 | 4519 | AN10461 |
| 240  | CONTIG61 | 816529 | 817718 | 2.73 | 0.00E+00 | transcription_start_site | + | 815758 | 815758 | 1365  | 4519 | AN10461 |
| 1203 | CONTIG61 | 815029 | 815912 | 1.52 | 1.44E-02 | transcription_start_site | + | 815758 | 815758 | -287  | 4519 | AN10461 |
| 697  | CONTIG61 | 516089 | 516583 | 2.05 | 5.08E-03 | transcription_start_site | + | 520527 | 520527 | -4191 | 4531 | AN10465 |
| 697  | CONTIG61 | 516089 | 516583 | 2.05 | 5.08E-03 | transcription_start_site | + | 520791 | 520791 | -4455 | 4532 | AN10465 |
| 697  | CONTIG61 | 516089 | 516583 | 2.05 | 5.08E-03 | transcription_start_site | + | 521066 | 521066 | -4730 | 4533 | AN10465 |
| 697  | CONTIG61 | 516089 | 516583 | 2.05 | 5.08E-03 | transcription_start_site | + | 521182 | 521182 | -4846 | 4534 | AN10465 |
| 697  | CONTIG61 | 516089 | 516583 | 2.05 | 5.08E-03 | transcription_start_site | + | 521352 | 521352 | -5016 | 4535 | AN10465 |
| 1009 | CONTIG61 | 549526 | 549810 | 1.71 | 1.54E-02 | transcription_start_site | - | 545079 | 545079 | -4589 | 4536 | AN10466 |
| 1009 | CONTIG61 | 549526 | 549810 | 1.71 | 1.54E-02 | transcription_start_site | - | 544822 | 544822 | -4846 | 4537 | AN10466 |
| 1009 | CONTIG61 | 549526 | 549810 | 1.71 | 1.54E-02 | transcription_start_site | - | 544648 | 544648 | -5020 | 4538 | AN10466 |
| 1694 | CONTIG61 | 543076 | 543588 | 1.14 | 9.60E-02 | transcription_start_site | - | 544126 | 544126 | 794   | 4541 | AN10466 |
| 1694 | CONTIG61 | 543076 | 543588 | 1.14 | 9.60E-02 | transcription_start_site | - | 544297 | 544297 | 965   | 4540 | AN10466 |
| 1694 | CONTIG61 | 543076 | 543588 | 1.14 | 9.60E-02 | transcription_start_site | - | 544518 | 544518 | 1186  | 4539 | AN10466 |
| 1169 | CONTIG61 | 718502 | 718791 | 1.56 | 2.63E-02 | transcription_start_site | + | 718683 | 718683 | -36   | 4545 | AN10468 |
| 1169 | CONTIG61 | 718502 | 718791 | 1.56 | 2.63E-02 | transcription_start_site | + | 719067 | 719067 | -420  | 4546 | AN10468 |
| 1169 | CONTIG61 | 718502 | 718791 | 1.56 | 2.63E-02 | transcription_start_site | + | 720063 | 720063 | -1416 | 4547 | AN10468 |
| 1169 | CONTIG61 | 718502 | 718791 | 1.56 | 2.63E-02 | transcription_start_site | + | 720208 | 720208 | -1561 | 4548 | AN10468 |
| 2325 | CONTIG62 | 68034  | 68904  | 0.63 | 1.97E-01 | transcription_start_site | - | 68251  | 68251  | -218  | 4549 | AN10469 |
| 2325 | CONTIG62 | 68034  | 68904  | 0.63 | 1.97E-01 | transcription_start_site | - | 67764  | 67764  | -705  | 4550 | AN10469 |
| 2325 | CONTIG62 | 68034  | 68904  | 0.63 | 1.97E-01 | transcription_start_site | - | 67560  | 67560  | -909  | 4551 | AN10469 |
| 1153 | CONTIG16 | 7728   | 8232   | 1.57 | 2.30E-02 | transcription_start_site | + | 8438   | 8438   | -458  | 4552 | AN1047  |
| 1153 | CONTIG16 | 7728   | 8232   | 1.57 | 2.30E-02 | transcription_start_site | + | 8584   | 8584   | -604  | 4553 | AN1047  |
| 1153 | CONTIG16 | 7728   | 8232   | 1.57 | 2.30E-02 | transcription_start_site | + | 8677   | 8677   | -697  | 4554 | AN1047  |
| 1153 | CONTIG16 | 7728   | 8232   | 1.57 | 2.30E-02 | transcription_start_site | + | 10180  | 10180  | -2200 | 4555 | AN1047  |
| 1153 | CONTIG16 | 7728   | 8232   | 1.57 | 2.30E-02 | transcription_start_site | + | 10539  | 10539  | -2559 | 4556 | AN1047  |
| 1846 | CONTIG16 | 11413  | 11692  | 1.05 | 1.97E-01 | transcription_start_site | + | 10539  | 10539  | 1013  | 4556 | AN1047  |
| 2220 | CONTIG62 | 95631  | 96356  | 0.77 | 6.50E-02 | transcription_start_site | - | 95669  | 95669  | -324  | 4562 | AN10471 |
| 2220 | CONTIG62 | 95631  | 96356  | 0.77 | 6.50E-02 | transcription_start_site | - | 95511  | 95511  | -482  | 4563 | AN10471 |
| 2220 | CONTIG62 | 95631  | 96356  | 0.77 | 6.50E-02 | transcription_start_site | - | 94810  | 94810  | -1183 | 4564 | AN10471 |
| 2157 | CONTIG62 | 151278 | 151933 | 0.82 | 4.73E-02 | transcription_start_site | - | 147611 | 147611 | -3994 | 4565 | AN10472 |
| 2157 | CONTIG62 | 151278 | 151933 | 0.82 | 4.73E-02 | transcription_start_site | - | 147462 | 147462 | -4143 | 4566 | AN10472 |
| 2157 | CONTIG62 | 151278 | 151933 | 0.82 | 4.73E-02 | transcription_start_site | - | 147239 | 147239 | -4366 | 4567 | AN10472 |
| 2157 | CONTIG62 | 151278 | 151933 | 0.82 | 4.73E-02 | transcription_start_site | - | 147059 | 147059 | -4546 | 4568 | AN10472 |
| 2157 | CONTIG62 | 151278 | 151933 | 0.82 | 4.73E-02 | transcription_start_site | - | 146600 | 146600 | -5005 | 4569 | AN10472 |
| 2220 | CONTIG62 | 95631  | 96356  | 0.77 | 6.50E-02 | transcription_start_site | - | 90762  | 90762  | -5231 | 4572 | AN10473 |
| 2363 | CONTIG62 | 143553 | 144877 | 0.48 | 1.96E-01 | transcription_start_site | - | 145241 | 145241 | 1026  | 4573 | AN10474 |
| 2363 | CONTIG62 | 143553 | 144877 | 0.48 | 1.96E-01 | transcription_start_site | - | 143695 | 143695 | -520  | 4574 | AN10475 |
| 2363 | CONTIG62 | 143553 | 144877 | 0.48 | 1.96E-01 | transcription_start_site | - | 143510 | 143510 | -705  | 4575 | AN10475 |
| 2363 | CONTIG62 | 143553 | 144877 | 0.48 | 1.96E-01 | transcription_start_site | - | 142639 | 142639 | -1576 | 4576 | AN10475 |
| 2324 | CONTIG62 | 23938  | 24357  | 0.63 | 1.97E-01 | transcription_start_site | - | 20747  | 20747  | -3400 | 4578 | AN10477 |
| 2324 | CONTIG62 | 23938  | 24357  | 0.63 | 1.97E-01 | transcription_start_site | - | 20390  | 20390  | -3757 | 4579 | AN10477 |
| 2324 | CONTIG62 | 23938  | 24357  | 0.63 | 1.97E-01 | transcription_start_site | - | 20289  | 20289  | -3858 | 4580 | AN10477 |
| 2220 | CONTIG62 | 95631  | 96356  | 0.77 | 6.50E-02 | transcription_start_site | - | 97190  | 97190  | 1196  | 4585 | AN10479 |
| 1153 | CONTIG16 | 7728   | 8232   | 1.57 | 2.30E-02 | transcription_start_site | + | 12978  | 12978  | -4998 | 4586 | AN1048  |
| 1846 | CONTIG16 | 11413  | 11692  | 1.05 | 1.97E-01 | transcription_start_site | + | 12978  | 12978  | -1425 | 4586 | AN1048  |
| 1846 | CONTIG16 | 11413  | 11692  | 1.05 | 1.97E-01 | transcription_start_site | + | 13426  | 13426  | -1873 | 4587 | AN1048  |
| 1846 | CONTIG16 | 11413  | 11692  | 1.05 | 1.97E-01 | transcription_start_site | + | 13901  | 13901  | -2348 | 4588 | AN1048  |
| 2325 | CONTIG62 | 68034  | 68904  | 0.63 | 1.97E-01 | transcription_start_site | - | 67176  | 67176  | -1293 | 4589 | AN10480 |
| 55   | CONTIG63 | 7291   | 7625   | 3.22 | 0.00E+00 | transcription_start_site | + | 8017   | 8017   | -559  | 4594 | AN10483 |
| 55   | CONTIG63 | 7291   | 7625   | 3.22 | 0.00E+00 | transcription_start_site | + | 8244   | 8244   | -786  | 4595 | AN10483 |
| 2219 | CONTIG64 | 22143  | 23087  | 0.77 | 1.75E-02 | transcription_start_site | + | 26116  | 26116  | -3501 | 4602 | AN10486 |
| 2219 | CONTIG64 | 22143  | 23087  | 0.77 | 1.75E-02 | transcription_start_site | + | 27182  | 27182  | -4567 | 4603 | AN10486 |



|      |          |        |        |      |          |                          |   |        |        |       |      |         |
|------|----------|--------|--------|------|----------|--------------------------|---|--------|--------|-------|------|---------|
| 598  | CONTIG64 | 87241  | 87582  | 2.18 | 0.00E+00 | transcription_start_site | - | 83119  | 83119  | -4292 | 4605 | AN10487 |
| 598  | CONTIG64 | 87241  | 87582  | 2.18 | 0.00E+00 | transcription_start_site | - | 82789  | 82789  | -4622 | 4606 | AN10487 |
| 598  | CONTIG64 | 87241  | 87582  | 2.18 | 0.00E+00 | transcription_start_site | - | 82704  | 82704  | -4707 | 4607 | AN10487 |
| 598  | CONTIG64 | 87241  | 87582  | 2.18 | 0.00E+00 | transcription_start_site | - | 82481  | 82481  | -4930 | 4608 | AN10487 |
| 1846 | CONTIG16 | 11413  | 11692  | 1.05 | 1.97E-01 | transcription_start_site | + | 14390  | 14390  | -2837 | 4617 | AN1049  |
| 796  | CONTIG64 | 18834  | 19116  | 1.94 | 2.69E-04 | transcription_start_site | + | 23203  | 23203  | -4228 | 4619 | AN10491 |
| 1450 | CONTIG64 | 19729  | 20617  | 1.3  | 9.75E-04 | transcription_start_site | + | 23203  | 23203  | -3030 | 4619 | AN10491 |
| 1450 | CONTIG64 | 19729  | 20617  | 1.3  | 9.75E-04 | transcription_start_site | + | 24177  | 24177  | -4004 | 4620 | AN10491 |
| 1450 | CONTIG64 | 19729  | 20617  | 1.3  | 9.75E-04 | transcription_start_site | + | 24663  | 24663  | -4490 | 4621 | AN10491 |
| 2219 | CONTIG64 | 22143  | 23087  | 0.77 | 1.75E-02 | transcription_start_site | + | 23203  | 23203  | -588  | 4619 | AN10491 |
| 2219 | CONTIG64 | 22143  | 23087  | 0.77 | 1.75E-02 | transcription_start_site | + | 24177  | 24177  | -1562 | 4620 | AN10491 |
| 2219 | CONTIG64 | 22143  | 23087  | 0.77 | 1.75E-02 | transcription_start_site | + | 24663  | 24663  | -2048 | 4621 | AN10491 |
| 2285 | CONTIG64 | 18314  | 18578  | 0.69 | 1.76E-01 | transcription_start_site | + | 23203  | 23203  | -4757 | 4619 | AN10491 |
| 1827 | CONTIG65 | 53637  | 53976  | 1.05 | 3.01E-02 | transcription_start_site | + | 53886  | 53886  | -79   | 4626 | AN10494 |
| 1827 | CONTIG65 | 53637  | 53976  | 1.05 | 3.01E-02 | transcription_start_site | + | 54787  | 54787  | -980  | 4627 | AN10494 |
| 2107 | CONTIG65 | 49215  | 49634  | 0.87 | 6.74E-02 | transcription_start_site | + | 53886  | 53886  | -4461 | 4626 | AN10494 |
| 1372 | CONTIG65 | 143118 | 143387 | 1.37 | 7.08E-03 | transcription_start_site | - | 143081 | 143081 | -171  | 4628 | AN10495 |
| 1372 | CONTIG65 | 143118 | 143387 | 1.37 | 7.08E-03 | transcription_start_site | - | 142553 | 142553 | -699  | 4629 | AN10495 |
| 1372 | CONTIG65 | 143118 | 143387 | 1.37 | 7.08E-03 | transcription_start_site | - | 142108 | 142108 | -1144 | 4630 | AN10495 |
| 2109 | CONTIG65 | 201545 | 201889 | 0.87 | 6.74E-02 | transcription_start_site | + | 202083 | 202083 | -366  | 4631 | AN10496 |
| 2109 | CONTIG65 | 201545 | 201889 | 0.87 | 6.74E-02 | transcription_start_site | + | 202309 | 202309 | -592  | 4632 | AN10496 |
| 2109 | CONTIG65 | 201545 | 201889 | 0.87 | 6.74E-02 | transcription_start_site | + | 202373 | 202373 | -656  | 4633 | AN10496 |
| 2109 | CONTIG65 | 201545 | 201889 | 0.87 | 6.74E-02 | transcription_start_site | + | 202451 | 202451 | -734  | 4634 | AN10496 |
| 2109 | CONTIG65 | 201545 | 201889 | 0.87 | 6.74E-02 | transcription_start_site | + | 202649 | 202649 | -932  | 4635 | AN10496 |
| 2109 | CONTIG65 | 201545 | 201889 | 0.87 | 6.74E-02 | transcription_start_site | + | 203012 | 203012 | -1295 | 4636 | AN10496 |
| 2109 | CONTIG65 | 201545 | 201889 | 0.87 | 6.74E-02 | transcription_start_site | + | 203202 | 203202 | -1485 | 4637 | AN10496 |
| 2109 | CONTIG65 | 201545 | 201889 | 0.87 | 6.74E-02 | transcription_start_site | + | 203319 | 203319 | -1602 | 4638 | AN10496 |
| 2165 | CONTIG65 | 34131  | 34580  | 0.82 | 8.63E-02 | transcription_start_site | - | 30100  | 30100  | -4255 | 4646 | AN10499 |
| 2201 | CONTIG65 | 29481  | 29910  | 0.79 | 9.60E-02 | transcription_start_site | - | 30100  | 30100  | 404   | 4646 | AN10499 |
| 2107 | CONTIG65 | 49215  | 49634  | 0.87 | 6.74E-02 | transcription_start_site | + | 50385  | 50385  | -960  | 4658 | AN10502 |
| 2107 | CONTIG65 | 49215  | 49634  | 0.87 | 6.74E-02 | transcription_start_site | + | 50560  | 50560  | -1135 | 4659 | AN10502 |
| 2107 | CONTIG65 | 49215  | 49634  | 0.87 | 6.74E-02 | transcription_start_site | + | 50936  | 50936  | -1511 | 4660 | AN10502 |
| 2107 | CONTIG65 | 49215  | 49634  | 0.87 | 6.74E-02 | transcription_start_site | + | 51071  | 51071  | -1646 | 4661 | AN10502 |
| 2107 | CONTIG65 | 49215  | 49634  | 0.87 | 6.74E-02 | transcription_start_site | + | 51390  | 51390  | -1965 | 4662 | AN10502 |
| 2107 | CONTIG65 | 49215  | 49634  | 0.87 | 6.74E-02 | transcription_start_site | + | 51889  | 51889  | -2464 | 4663 | AN10502 |
| 1372 | CONTIG65 | 143118 | 143387 | 1.37 | 7.08E-03 | transcription_start_site | - | 141255 | 141255 | -1997 | 4664 | AN10503 |
| 1372 | CONTIG65 | 143118 | 143387 | 1.37 | 7.08E-03 | transcription_start_site | - | 141063 | 141063 | -2189 | 4665 | AN10503 |
| 1372 | CONTIG65 | 143118 | 143387 | 1.37 | 7.08E-03 | transcription_start_site | - | 140973 | 140973 | -2279 | 4666 | AN10503 |
| 1372 | CONTIG65 | 143118 | 143387 | 1.37 | 7.08E-03 | transcription_start_site | - | 140791 | 140791 | -2461 | 4667 | AN10503 |
| 1372 | CONTIG65 | 143118 | 143387 | 1.37 | 7.08E-03 | transcription_start_site | - | 140205 | 140205 | -3047 | 4668 | AN10503 |
| 1372 | CONTIG65 | 143118 | 143387 | 1.37 | 7.08E-03 | transcription_start_site | - | 139825 | 139825 | -3427 | 4669 | AN10503 |
| 2109 | CONTIG65 | 201545 | 201889 | 0.87 | 6.74E-02 | transcription_start_site | + | 204308 | 204308 | -2591 | 4670 | AN10504 |
| 2109 | CONTIG65 | 201545 | 201889 | 0.87 | 6.74E-02 | transcription_start_site | + | 204939 | 204939 | -3222 | 4671 | AN10504 |
| 2201 | CONTIG65 | 29481  | 29910  | 0.79 | 9.60E-02 | transcription_start_site | - | 28645  | 28645  | -1050 | 4672 | AN10505 |
| 2201 | CONTIG65 | 29481  | 29910  | 0.79 | 9.60E-02 | transcription_start_site | - | 28340  | 28340  | -1355 | 4673 | AN10505 |
| 2201 | CONTIG65 | 29481  | 29910  | 0.79 | 9.60E-02 | transcription_start_site | - | 28183  | 28183  | -1512 | 4674 | AN10505 |
| 2201 | CONTIG65 | 29481  | 29910  | 0.79 | 9.60E-02 | transcription_start_site | - | 27460  | 27460  | -2235 | 4675 | AN10505 |
| 828  | CONTIG67 | 117768 | 118045 | 1.9  | 7.70E-03 | transcription_start_site | + | 119749 | 119749 | -1842 | 4676 | AN10506 |
| 828  | CONTIG67 | 117768 | 118045 | 1.9  | 7.70E-03 | transcription_start_site | + | 119842 | 119842 | -1935 | 4677 | AN10506 |
| 828  | CONTIG67 | 117768 | 118045 | 1.9  | 7.70E-03 | transcription_start_site | + | 120311 | 120311 | -2404 | 4678 | AN10506 |
| 828  | CONTIG67 | 117768 | 118045 | 1.9  | 7.70E-03 | transcription_start_site | + | 120661 | 120661 | -2754 | 4679 | AN10506 |
| 828  | CONTIG67 | 117768 | 118045 | 1.9  | 7.70E-03 | transcription_start_site | + | 121185 | 121185 | -3278 | 4680 | AN10506 |
| 828  | CONTIG67 | 117768 | 118045 | 1.9  | 7.70E-03 | transcription_start_site | + | 121358 | 121358 | -3451 | 4681 | AN10506 |
| 828  | CONTIG67 | 117768 | 118045 | 1.9  | 7.70E-03 | transcription_start_site | + | 118448 | 118448 | -541  | 4682 | AN10507 |
| 395  | CONTIG67 | 2946   | 3277   | 2.45 | 3.81E-04 | transcription_start_site | + | 5874   | 5874   | -2762 | 4686 | AN10509 |
| 454  | CONTIG67 | 212785 | 213659 | 2.38 | 0.00E+00 | transcription_start_site | + | 217660 | 217660 | -4438 | 4687 | AN10510 |
| 454  | CONTIG67 | 212785 | 213659 | 2.38 | 0.00E+00 | transcription_start_site | + | 217795 | 217795 | -4573 | 4688 | AN10510 |

|      |          |        |        |      |          |                          |   |        |        |       |      |         |
|------|----------|--------|--------|------|----------|--------------------------|---|--------|--------|-------|------|---------|
| 454  | CONTIG67 | 212785 | 213659 | 2.38 | 0.00E+00 | transcription_start_site | + | 218241 | 218241 | -5019 | 4689 | AN10510 |
| 454  | CONTIG67 | 212785 | 213659 | 2.38 | 0.00E+00 | transcription_start_site | + | 218370 | 218370 | -5148 | 4690 | AN10510 |
| 454  | CONTIG67 | 212785 | 213659 | 2.38 | 0.00E+00 | transcription_start_site | + | 218449 | 218449 | -5227 | 4691 | AN10510 |
| 2216 | CONTIG68 | 108755 | 109551 | 0.78 | 1.97E-01 | transcription_start_site | - | 103773 | 103773 | -5380 | 4709 | AN10516 |
| 2216 | CONTIG68 | 108755 | 109551 | 0.78 | 1.97E-01 | transcription_start_site | + | 113627 | 113627 | -4474 | 4712 | AN10517 |
| 2216 | CONTIG68 | 108755 | 109551 | 0.78 | 1.97E-01 | transcription_start_site | + | 113830 | 113830 | -4677 | 4713 | AN10517 |
| 2216 | CONTIG68 | 108755 | 109551 | 0.78 | 1.97E-01 | transcription_start_site | + | 113921 | 113921 | -4768 | 4714 | AN10517 |
| 2216 | CONTIG68 | 108755 | 109551 | 0.78 | 1.97E-01 | transcription_start_site | + | 114439 | 114439 | -5286 | 4715 | AN10517 |
| 1854 | CONTIG68 | 168393 | 168667 | 1.04 | 7.66E-02 | transcription_start_site | - | 167462 | 167462 | -1068 | 4718 | AN10518 |
| 1854 | CONTIG68 | 168393 | 168667 | 1.04 | 7.66E-02 | transcription_start_site | - | 167318 | 167318 | -1212 | 4719 | AN10518 |
| 4    | CONTIG16 | 24243  | 24517  | 3.63 | 0.00E+00 | transcription_start_site | + | 25596  | 25596  | -1216 | 4722 | AN1052  |
| 4    | CONTIG16 | 24243  | 24517  | 3.63 | 0.00E+00 | transcription_start_site | + | 25697  | 25697  | -1317 | 4723 | AN1052  |
| 181  | CONTIG16 | 23413  | 23917  | 2.88 | 3.81E-04 | transcription_start_site | + | 25596  | 25596  | -1931 | 4722 | AN1052  |
| 181  | CONTIG16 | 23413  | 23917  | 2.88 | 3.81E-04 | transcription_start_site | + | 25697  | 25697  | -2032 | 4723 | AN1052  |
| 696  | CONTIG16 | 22068  | 22932  | 2.05 | 9.75E-04 | transcription_start_site | + | 25596  | 25596  | -3096 | 4722 | AN1052  |
| 696  | CONTIG16 | 22068  | 22932  | 2.05 | 9.75E-04 | transcription_start_site | + | 25697  | 25697  | -3197 | 4723 | AN1052  |
| 1854 | CONTIG68 | 168393 | 168667 | 1.04 | 7.66E-02 | transcription_start_site | - | 166317 | 166317 | -2213 | 4728 | AN10523 |
| 1854 | CONTIG68 | 168393 | 168667 | 1.04 | 7.66E-02 | transcription_start_site | - | 166242 | 166242 | -2288 | 4729 | AN10523 |
| 1854 | CONTIG68 | 168393 | 168667 | 1.04 | 7.66E-02 | transcription_start_site | - | 165804 | 165804 | -2726 | 4730 | AN10523 |
| 1500 | CONTIG68 | 50638  | 51074  | 1.27 | 1.61E-02 | transcription_start_site | - | 51716  | 51716  | 860   | 4735 | AN10525 |
| 1500 | CONTIG68 | 50638  | 51074  | 1.27 | 1.61E-02 | transcription_start_site | - | 51960  | 51960  | 1104  | 4734 | AN10525 |
| 338  | CONTIG68 | 222755 | 223419 | 2.55 | 0.00E+00 | transcription_start_site | + | 223691 | 223691 | -604  | 4754 | AN10528 |
| 872  | CONTIG68 | 224340 | 224839 | 1.86 | 3.37E-03 | transcription_start_site | + | 223691 | 223691 | 898   | 4754 | AN10528 |
| 4    | CONTIG16 | 24243  | 24517  | 3.63 | 0.00E+00 | transcription_start_site | + | 28152  | 28152  | -3772 | 4756 | AN1053  |
| 4    | CONTIG16 | 24243  | 24517  | 3.63 | 0.00E+00 | transcription_start_site | + | 28259  | 28259  | -3879 | 4757 | AN1053  |
| 181  | CONTIG16 | 23413  | 23917  | 2.88 | 3.81E-04 | transcription_start_site | + | 28152  | 28152  | -4487 | 4756 | AN1053  |
| 181  | CONTIG16 | 23413  | 23917  | 2.88 | 3.81E-04 | transcription_start_site | + | 28259  | 28259  | -4594 | 4757 | AN1053  |
| 438  | CONTIG69 | 33151  | 33501  | 2.4  | 3.81E-04 | transcription_start_site | - | 32804  | 32804  | -522  | 4763 | AN10533 |
| 438  | CONTIG69 | 33151  | 33501  | 2.4  | 3.81E-04 | transcription_start_site | - | 32726  | 32726  | -600  | 4764 | AN10533 |
| 438  | CONTIG69 | 33151  | 33501  | 2.4  | 3.81E-04 | transcription_start_site | - | 29964  | 29964  | -3362 | 4765 | AN10533 |
| 438  | CONTIG69 | 33151  | 33501  | 2.4  | 3.81E-04 | transcription_start_site | - | 29656  | 29656  | -3670 | 4766 | AN10534 |
| 438  | CONTIG69 | 33151  | 33501  | 2.4  | 3.81E-04 | transcription_start_site | - | 29474  | 29474  | -3852 | 4767 | AN10534 |
| 277  | CONTIG71 | 2102   | 2620   | 2.67 | 1.80E-02 | transcription_start_site | + | 2304   | 2304   | 57    | 4770 | AN10537 |
| 1688 | CONTIG74 | 6770   | 7404   | 1.14 | 1.83E-02 | transcription_start_site | - | 6529   | 6529   | -558  | 4771 | AN10539 |
| 1688 | CONTIG74 | 6770   | 7404   | 1.14 | 1.83E-02 | transcription_start_site | - | 6229   | 6229   | -858  | 4772 | AN10539 |
| 1367 | CONTIG75 | 100520 | 100869 | 1.38 | 6.04E-02 | transcription_start_site | - | 97484  | 97484  | -3210 | 4790 | AN10543 |
| 1367 | CONTIG75 | 100520 | 100869 | 1.38 | 6.04E-02 | transcription_start_site | - | 97260  | 97260  | -3434 | 4791 | AN10543 |
| 1367 | CONTIG75 | 100520 | 100869 | 1.38 | 6.04E-02 | transcription_start_site | - | 96625  | 96625  | -4069 | 4792 | AN10543 |
| 1367 | CONTIG75 | 100520 | 100869 | 1.38 | 6.04E-02 | transcription_start_site | - | 95557  | 95557  | -5137 | 4793 | AN10543 |
| 1772 | CONTIG75 | 139279 | 139929 | 1.09 | 8.54E-02 | transcription_start_site | + | 140128 | 140128 | -524  | 4794 | AN10544 |
| 1772 | CONTIG75 | 139279 | 139929 | 1.09 | 8.54E-02 | transcription_start_site | + | 142724 | 142724 | -3120 | 4801 | AN10548 |
| 1772 | CONTIG75 | 139279 | 139929 | 1.09 | 8.54E-02 | transcription_start_site | + | 143028 | 143028 | -3424 | 4802 | AN10548 |
| 1772 | CONTIG75 | 139279 | 139929 | 1.09 | 8.54E-02 | transcription_start_site | + | 143546 | 143546 | -3942 | 4803 | AN10548 |
| 1772 | CONTIG75 | 139279 | 139929 | 1.09 | 8.54E-02 | transcription_start_site | + | 143769 | 143769 | -4165 | 4804 | AN10548 |
| 1772 | CONTIG75 | 139279 | 139929 | 1.09 | 8.54E-02 | transcription_start_site | + | 144925 | 144925 | -5321 | 4805 | AN10548 |
| 1367 | CONTIG75 | 100520 | 100869 | 1.38 | 6.04E-02 | transcription_start_site | - | 100411 | 100411 | -283  | 4811 | AN10550 |
| 1367 | CONTIG75 | 100520 | 100869 | 1.38 | 6.04E-02 | transcription_start_site | - | 99135  | 99135  | -1559 | 4812 | AN10550 |
| 1047 | CONTIG76 | 150914 | 151573 | 1.67 | 1.61E-02 | transcription_start_site | - | 146448 | 146448 | -4795 | 4822 | AN10552 |
| 1047 | CONTIG76 | 150914 | 151573 | 1.67 | 1.61E-02 | transcription_start_site | - | 146090 | 146090 | -5153 | 4823 | AN10552 |
| 1047 | CONTIG76 | 150914 | 151573 | 1.67 | 1.61E-02 | transcription_start_site | - | 145975 | 145975 | -5268 | 4824 | AN10552 |
| 1545 | CONTIG76 | 146789 | 147150 | 1.24 | 1.08E-01 | transcription_start_site | - | 146448 | 146448 | -521  | 4822 | AN10552 |
| 1545 | CONTIG76 | 146789 | 147150 | 1.24 | 1.08E-01 | transcription_start_site | - | 146090 | 146090 | -879  | 4823 | AN10552 |
| 1545 | CONTIG76 | 146789 | 147150 | 1.24 | 1.08E-01 | transcription_start_site | - | 145975 | 145975 | -994  | 4824 | AN10552 |
| 1545 | CONTIG76 | 146789 | 147150 | 1.24 | 1.08E-01 | transcription_start_site | - | 145627 | 145627 | -1342 | 4825 | AN10552 |
| 1545 | CONTIG76 | 146789 | 147150 | 1.24 | 1.08E-01 | transcription_start_site | - | 145394 | 145394 | -1575 | 4826 | AN10552 |
| 1545 | CONTIG76 | 146789 | 147150 | 1.24 | 1.08E-01 | transcription_start_site | - | 144650 | 144650 | -2319 | 4831 | AN10554 |
| 1545 | CONTIG76 | 146789 | 147150 | 1.24 | 1.08E-01 | transcription_start_site | - | 144463 | 144463 | -2506 | 4832 | AN10554 |

|      |          |        |        |      |          |                          |   |        |        |       |      |         |
|------|----------|--------|--------|------|----------|--------------------------|---|--------|--------|-------|------|---------|
| 1545 | CONTIG76 | 146789 | 147150 | 1.24 | 1.08E-01 | transcription_start_site | - | 144134 | 144134 | -2835 | 4833 | AN10554 |
| 1545 | CONTIG76 | 146789 | 147150 | 1.24 | 1.08E-01 | transcription_start_site | - | 143839 | 143839 | -3130 | 4834 | AN10554 |
| 1490 | CONTIG77 | 35117  | 35601  | 1.28 | 2.63E-02 | transcription_start_site | + | 39260  | 39260  | -3901 | 4835 | AN10555 |
| 1954 | CONTIG77 | 43971  | 44695  | 0.97 | 3.47E-02 | transcription_start_site | + | 48169  | 48169  | -3836 | 4836 | AN10556 |
| 1954 | CONTIG77 | 43971  | 44695  | 0.97 | 3.47E-02 | transcription_start_site | + | 48982  | 48982  | -4649 | 4837 | AN10556 |
| 1954 | CONTIG77 | 43971  | 44695  | 0.97 | 3.47E-02 | transcription_start_site | + | 49219  | 49219  | -4886 | 4838 | AN10556 |
| 1491 | CONTIG77 | 127521 | 127775 | 1.28 | 2.63E-02 | transcription_start_site | - | 126794 | 126794 | -854  | 4841 | AN10557 |
| 1491 | CONTIG77 | 127521 | 127775 | 1.28 | 2.63E-02 | transcription_start_site | - | 126524 | 126524 | -1124 | 4842 | AN10557 |
| 1490 | CONTIG77 | 35117  | 35601  | 1.28 | 2.63E-02 | transcription_start_site | + | 37026  | 37026  | -1667 | 4843 | AN10558 |
| 1491 | CONTIG77 | 127521 | 127775 | 1.28 | 2.63E-02 | transcription_start_site | - | 122968 | 122968 | -4680 | 4850 | AN10560 |
| 2245 | CONTIG77 | 123090 | 124104 | 0.75 | 1.34E-01 | transcription_start_site | - | 122968 | 122968 | -629  | 4850 | AN10560 |
| 2245 | CONTIG77 | 123090 | 124104 | 0.75 | 1.34E-01 | transcription_start_site | - | 122476 | 122476 | -1121 | 4851 | AN10560 |
| 2245 | CONTIG77 | 123090 | 124104 | 0.75 | 1.34E-01 | transcription_start_site | - | 121883 | 121883 | -1714 | 4852 | AN10560 |
| 2245 | CONTIG77 | 123090 | 124104 | 0.75 | 1.34E-01 | transcription_start_site | - | 121781 | 121781 | -1816 | 4853 | AN10560 |
| 2245 | CONTIG77 | 123090 | 124104 | 0.75 | 1.34E-01 | transcription_start_site | - | 121682 | 121682 | -1915 | 4854 | AN10560 |
| 63   | CONTIG78 | 11633  | 12877  | 3.2  | 0.00E+00 | transcription_start_site | + | 15572  | 15572  | -3317 | 4855 | AN10561 |
| 63   | CONTIG78 | 11633  | 12877  | 3.2  | 0.00E+00 | transcription_start_site | + | 15692  | 15692  | -3437 | 4856 | AN10561 |
| 63   | CONTIG78 | 11633  | 12877  | 3.2  | 0.00E+00 | transcription_start_site | + | 16148  | 16148  | -3893 | 4857 | AN10561 |
| 63   | CONTIG78 | 11633  | 12877  | 3.2  | 0.00E+00 | transcription_start_site | + | 16243  | 16243  | -3988 | 4858 | AN10561 |
| 1393 | CONTIG78 | 14935  | 15219  | 1.36 | 4.78E-02 | transcription_start_site | + | 15572  | 15572  | -495  | 4855 | AN10561 |
| 1393 | CONTIG78 | 14935  | 15219  | 1.36 | 4.78E-02 | transcription_start_site | + | 15692  | 15692  | -615  | 4856 | AN10561 |
| 1393 | CONTIG78 | 14935  | 15219  | 1.36 | 4.78E-02 | transcription_start_site | + | 16148  | 16148  | -1071 | 4857 | AN10561 |
| 1393 | CONTIG78 | 14935  | 15219  | 1.36 | 4.78E-02 | transcription_start_site | + | 16243  | 16243  | -1166 | 4858 | AN10561 |
| 2011 | CONTIG78 | 13143  | 13713  | 0.94 | 1.76E-01 | transcription_start_site | + | 15572  | 15572  | -2144 | 4855 | AN10561 |
| 2011 | CONTIG78 | 13143  | 13713  | 0.94 | 1.76E-01 | transcription_start_site | + | 15692  | 15692  | -2264 | 4856 | AN10561 |
| 2011 | CONTIG78 | 13143  | 13713  | 0.94 | 1.76E-01 | transcription_start_site | + | 16148  | 16148  | -2720 | 4857 | AN10561 |
| 2011 | CONTIG78 | 13143  | 13713  | 0.94 | 1.76E-01 | transcription_start_site | + | 16243  | 16243  | -2815 | 4858 | AN10561 |
| 2006 | CONTIG78 | 213532 | 214486 | 0.94 | 1.15E-01 | transcription_start_site | - | 209106 | 209106 | -4903 | 4864 | AN10564 |
| 128  | CONTIG78 | 303093 | 303362 | 3.02 | 0.00E+00 | transcription_start_site | + | 306056 | 306056 | -2828 | 4868 | AN10565 |
| 128  | CONTIG78 | 303093 | 303362 | 3.02 | 0.00E+00 | transcription_start_site | + | 306850 | 306850 | -3622 | 4869 | AN10565 |
| 63   | CONTIG78 | 11633  | 12877  | 3.2  | 0.00E+00 | transcription_start_site | + | 16636  | 16636  | -4381 | 4874 | AN10568 |
| 63   | CONTIG78 | 11633  | 12877  | 3.2  | 0.00E+00 | transcription_start_site | + | 17156  | 17156  | -4901 | 4875 | AN10568 |
| 63   | CONTIG78 | 11633  | 12877  | 3.2  | 0.00E+00 | transcription_start_site | + | 17265  | 17265  | -5010 | 4876 | AN10568 |
| 1393 | CONTIG78 | 14935  | 15219  | 1.36 | 4.78E-02 | transcription_start_site | + | 16636  | 16636  | -1559 | 4874 | AN10568 |
| 1393 | CONTIG78 | 14935  | 15219  | 1.36 | 4.78E-02 | transcription_start_site | + | 17156  | 17156  | -2079 | 4875 | AN10568 |
| 1393 | CONTIG78 | 14935  | 15219  | 1.36 | 4.78E-02 | transcription_start_site | + | 17265  | 17265  | -2188 | 4876 | AN10568 |
| 2011 | CONTIG78 | 13143  | 13713  | 0.94 | 1.76E-01 | transcription_start_site | + | 16636  | 16636  | -3208 | 4874 | AN10568 |
| 2011 | CONTIG78 | 13143  | 13713  | 0.94 | 1.76E-01 | transcription_start_site | + | 17156  | 17156  | -3728 | 4875 | AN10568 |
| 2011 | CONTIG78 | 13143  | 13713  | 0.94 | 1.76E-01 | transcription_start_site | + | 17265  | 17265  | -3837 | 4876 | AN10568 |
| 128  | CONTIG78 | 303093 | 303362 | 3.02 | 0.00E+00 | transcription_start_site | + | 307219 | 307219 | -3991 | 4883 | AN10570 |
| 128  | CONTIG78 | 303093 | 303362 | 3.02 | 0.00E+00 | transcription_start_site | + | 307488 | 307488 | -4260 | 4884 | AN10570 |
| 1692 | CONTIG79 | 123826 | 124325 | 1.14 | 6.04E-02 | transcription_start_site | + | 125791 | 125791 | -1715 | 4887 | AN10572 |
| 1692 | CONTIG79 | 123826 | 124325 | 1.14 | 6.04E-02 | transcription_start_site | + | 126524 | 126524 | -2448 | 4888 | AN10572 |
| 2072 | CONTIG79 | 150385 | 150654 | 0.9  | 1.38E-01 | transcription_start_site | + | 154736 | 154736 | -4216 | 4889 | AN10573 |
| 2072 | CONTIG79 | 150385 | 150654 | 0.9  | 1.38E-01 | transcription_start_site | + | 155044 | 155044 | -4524 | 4890 | AN10573 |
| 2072 | CONTIG79 | 150385 | 150654 | 0.9  | 1.38E-01 | transcription_start_site | + | 155642 | 155642 | -5122 | 4891 | AN10573 |
| 1601 | CONTIG79 | 192692 | 193113 | 1.2  | 2.30E-02 | transcription_start_site | - | 188628 | 188628 | -4274 | 4892 | AN10574 |
| 2148 | CONTIG79 | 184657 | 185086 | 0.84 | 1.76E-01 | transcription_start_site | - | 185751 | 185751 | 879   | 4894 | AN10574 |
| 2148 | CONTIG79 | 184657 | 185086 | 0.84 | 1.76E-01 | transcription_start_site | - | 186028 | 186028 | 1156  | 4893 | AN10574 |
| 2295 | CONTIG79 | 188867 | 190476 | 0.67 | 7.77E-02 | transcription_start_site | - | 188628 | 188628 | -1043 | 4892 | AN10574 |
| 2295 | CONTIG79 | 188867 | 190476 | 0.67 | 7.77E-02 | transcription_start_site | - | 186028 | 186028 | -3643 | 4893 | AN10574 |
| 2295 | CONTIG79 | 188867 | 190476 | 0.67 | 7.77E-02 | transcription_start_site | - | 185751 | 185751 | -3920 | 4894 | AN10574 |
| 1692 | CONTIG79 | 123826 | 124325 | 1.14 | 6.04E-02 | transcription_start_site | + | 124429 | 124429 | -353  | 4895 | AN10575 |
| 2072 | CONTIG79 | 150385 | 150654 | 0.9  | 1.38E-01 | transcription_start_site | + | 149680 | 149680 | 839   | 4897 | AN10576 |
| 2148 | CONTIG79 | 184657 | 185086 | 0.84 | 1.76E-01 | transcription_start_site | - | 183597 | 183597 | -1274 | 4899 | AN10578 |
| 2148 | CONTIG79 | 184657 | 185086 | 0.84 | 1.76E-01 | transcription_start_site | - | 183424 | 183424 | -1447 | 4900 | AN10578 |
| 2148 | CONTIG79 | 184657 | 185086 | 0.84 | 1.76E-01 | transcription_start_site | - | 182990 | 182990 | -1881 | 4901 | AN10578 |

|      |          |        |        |      |          |                          |   |        |        |       |      |         |
|------|----------|--------|--------|------|----------|--------------------------|---|--------|--------|-------|------|---------|
| 144  | CONTIG16 | 45153  | 45742  | 2.97 | 2.26E-04 | transcription_start_site | + | 44636  | 44636  | 811   | 4908 | AN1058  |
| 144  | CONTIG16 | 45153  | 45742  | 2.97 | 2.26E-04 | transcription_start_site | + | 44293  | 44293  | 1154  | 4907 | AN1058  |
| 376  | CONTIG16 | 40738  | 41248  | 2.49 | 3.37E-03 | transcription_start_site | + | 43649  | 43649  | -2656 | 4906 | AN1058  |
| 376  | CONTIG16 | 40738  | 41248  | 2.49 | 3.37E-03 | transcription_start_site | + | 44293  | 44293  | -3300 | 4907 | AN1058  |
| 376  | CONTIG16 | 40738  | 41248  | 2.49 | 3.37E-03 | transcription_start_site | + | 44636  | 44636  | -3643 | 4908 | AN1058  |
| 443  | CONTIG16 | 42318  | 42732  | 2.4  | 4.57E-03 | transcription_start_site | + | 43649  | 43649  | -1124 | 4906 | AN1058  |
| 443  | CONTIG16 | 42318  | 42732  | 2.4  | 4.57E-03 | transcription_start_site | + | 44293  | 44293  | -1768 | 4907 | AN1058  |
| 443  | CONTIG16 | 42318  | 42732  | 2.4  | 4.57E-03 | transcription_start_site | + | 44636  | 44636  | -2111 | 4908 | AN1058  |
| 899  | CONTIG80 | 295363 | 295935 | 1.83 | 1.37E-02 | transcription_start_site | - | 292807 | 292807 | -2842 | 4919 | AN10583 |
| 899  | CONTIG80 | 295363 | 295935 | 1.83 | 1.37E-02 | transcription_start_site | - | 292730 | 292730 | -2919 | 4920 | AN10583 |
| 899  | CONTIG80 | 295363 | 295935 | 1.83 | 1.37E-02 | transcription_start_site | - | 292145 | 292145 | -3504 | 4921 | AN10583 |
| 899  | CONTIG80 | 295363 | 295935 | 1.83 | 1.37E-02 | transcription_start_site | - | 291862 | 291862 | -3787 | 4922 | AN10583 |
| 899  | CONTIG80 | 295363 | 295935 | 1.83 | 1.37E-02 | transcription_start_site | - | 291741 | 291741 | -3908 | 4923 | AN10583 |
| 18   | CONTIG80 | 46202  | 46551  | 3.45 | 0.00E+00 | transcription_start_site | - | 46393  | 46393  | 16    | 4936 | AN10587 |
| 18   | CONTIG80 | 46202  | 46551  | 3.45 | 0.00E+00 | transcription_start_site | - | 46542  | 46542  | 165   | 4935 | AN10587 |
| 18   | CONTIG80 | 46202  | 46551  | 3.45 | 0.00E+00 | transcription_start_site | - | 46080  | 46080  | -296  | 4937 | AN10587 |
| 144  | CONTIG16 | 45153  | 45742  | 2.97 | 2.26E-04 | transcription_start_site | + | 46429  | 46429  | -981  | 4941 | AN1059  |
| 144  | CONTIG16 | 45153  | 45742  | 2.97 | 2.26E-04 | transcription_start_site | + | 46870  | 46870  | -1422 | 4942 | AN1059  |
| 144  | CONTIG16 | 45153  | 45742  | 2.97 | 2.26E-04 | transcription_start_site | + | 48887  | 48887  | -3439 | 4943 | AN1059  |
| 443  | CONTIG16 | 42318  | 42732  | 2.4  | 4.57E-03 | transcription_start_site | + | 46429  | 46429  | -3904 | 4941 | AN1059  |
| 443  | CONTIG16 | 42318  | 42732  | 2.4  | 4.57E-03 | transcription_start_site | + | 46870  | 46870  | -4345 | 4942 | AN1059  |
| 1301 | CONTIG16 | 49818  | 50227  | 1.44 | 6.74E-02 | transcription_start_site | + | 48887  | 48887  | 1135  | 4943 | AN1059  |
| 898  | CONTIG80 | 101553 | 101842 | 1.83 | 1.37E-02 | transcription_start_site | + | 103430 | 103430 | -1732 | 4948 | AN10592 |
| 793  | CONTIG80 | 333996 | 334475 | 1.95 | 9.96E-03 | transcription_start_site | + | 334488 | 334488 | -252  | 4949 | AN10593 |
| 1935 | CONTIG80 | 330081 | 330582 | 0.99 | 1.76E-01 | transcription_start_site | + | 334488 | 334488 | -4156 | 4949 | AN10593 |
| 1213 | CONTIG81 | 104778 | 105577 | 1.51 | 4.92E-03 | transcription_start_site | + | 106647 | 106647 | -1469 | 4953 | AN10595 |
| 1213 | CONTIG81 | 104778 | 105577 | 1.51 | 4.92E-03 | transcription_start_site | + | 107232 | 107232 | -2054 | 4954 | AN10595 |
| 1213 | CONTIG81 | 104778 | 105577 | 1.51 | 4.92E-03 | transcription_start_site | + | 108580 | 108580 | -3402 | 4955 | AN10595 |
| 1213 | CONTIG81 | 104778 | 105577 | 1.51 | 4.92E-03 | transcription_start_site | + | 108836 | 108836 | -3658 | 4956 | AN10595 |
| 1217 | CONTIG81 | 109668 | 109942 | 1.51 | 1.25E-02 | transcription_start_site | + | 108836 | 108836 | 969   | 4956 | AN10595 |
| 1332 | CONTIG81 | 150528 | 150807 | 1.41 | 1.80E-02 | transcription_start_site | - | 151562 | 151562 | 894   | 4963 | AN10597 |
| 1332 | CONTIG81 | 150528 | 150807 | 1.41 | 1.80E-02 | transcription_start_site | - | 151622 | 151622 | 954   | 4962 | AN10597 |
| 1332 | CONTIG81 | 150528 | 150807 | 1.41 | 1.80E-02 | transcription_start_site | - | 151804 | 151804 | 1136  | 4961 | AN10597 |
| 2116 | CONTIG81 | 150993 | 151638 | 0.87 | 1.38E-01 | transcription_start_site | - | 151562 | 151562 | 246   | 4963 | AN10597 |
| 2116 | CONTIG81 | 150993 | 151638 | 0.87 | 1.38E-01 | transcription_start_site | - | 151622 | 151622 | 306   | 4962 | AN10597 |
| 2116 | CONTIG81 | 150993 | 151638 | 0.87 | 1.38E-01 | transcription_start_site | - | 151804 | 151804 | 488   | 4961 | AN10597 |
| 1213 | CONTIG81 | 104778 | 105577 | 1.51 | 4.92E-03 | transcription_start_site | + | 109942 | 109942 | -4764 | 4964 | AN10598 |
| 1217 | CONTIG81 | 109668 | 109942 | 1.51 | 1.25E-02 | transcription_start_site | + | 109942 | 109942 | -137  | 4964 | AN10598 |
| 1217 | CONTIG81 | 109668 | 109942 | 1.51 | 1.25E-02 | transcription_start_site | + | 112218 | 112218 | -2413 | 4965 | AN10598 |
| 2317 | CONTIG82 | 25354  | 26228  | 0.64 | 8.63E-02 | transcription_start_site | - | 21998  | 21998  | -3793 | 4966 | AN10599 |
| 2317 | CONTIG82 | 25354  | 26228  | 0.64 | 8.63E-02 | transcription_start_site | - | 21769  | 21769  | -4022 | 4967 | AN10599 |
| 2317 | CONTIG82 | 25354  | 26228  | 0.64 | 8.63E-02 | transcription_start_site | - | 21603  | 21603  | -4188 | 4968 | AN10599 |
| 2317 | CONTIG82 | 25354  | 26228  | 0.64 | 8.63E-02 | transcription_start_site | - | 21435  | 21435  | -4356 | 4969 | AN10599 |
| 1301 | CONTIG16 | 49818  | 50227  | 1.44 | 6.74E-02 | transcription_start_site | + | 50996  | 50996  | -973  | 4970 | AN1060  |
| 1301 | CONTIG16 | 49818  | 50227  | 1.44 | 6.74E-02 | transcription_start_site | + | 51326  | 51326  | -1303 | 4971 | AN1060  |
| 1301 | CONTIG16 | 49818  | 50227  | 1.44 | 6.74E-02 | transcription_start_site | + | 51468  | 51468  | -1445 | 4972 | AN1060  |
| 1301 | CONTIG16 | 49818  | 50227  | 1.44 | 6.74E-02 | transcription_start_site | + | 52462  | 52462  | -2439 | 4973 | AN1060  |
| 1301 | CONTIG16 | 49818  | 50227  | 1.44 | 6.74E-02 | transcription_start_site | + | 53635  | 53635  | -3612 | 4974 | AN1060  |
| 2317 | CONTIG82 | 25354  | 26228  | 0.64 | 8.63E-02 | transcription_start_site | - | 20373  | 20373  | -5418 | 4975 | AN10600 |
| 549  | CONTIG83 | 12766  | 13115  | 2.25 | 3.37E-03 | transcription_start_site | + | 13109  | 13109  | -168  | 4980 | AN10601 |
| 549  | CONTIG83 | 12766  | 13115  | 2.25 | 3.37E-03 | transcription_start_site | + | 13347  | 13347  | -406  | 4981 | AN10601 |
| 549  | CONTIG83 | 12766  | 13115  | 2.25 | 3.37E-03 | transcription_start_site | + | 13535  | 13535  | -594  | 4982 | AN10601 |
| 549  | CONTIG83 | 12766  | 13115  | 2.25 | 3.37E-03 | transcription_start_site | + | 13656  | 13656  | -715  | 4983 | AN10601 |
| 1760 | CONTIG83 | 14191  | 14610  | 1.1  | 1.22E-01 | transcription_start_site | + | 13656  | 13656  | 744   | 4983 | AN10601 |
| 1760 | CONTIG83 | 14191  | 14610  | 1.1  | 1.22E-01 | transcription_start_site | + | 13535  | 13535  | 865   | 4982 | AN10601 |
| 1760 | CONTIG83 | 14191  | 14610  | 1.1  | 1.22E-01 | transcription_start_site | + | 13347  | 13347  | 1053  | 4981 | AN10601 |
| 463  | CONTIG83 | 16052  | 16413  | 2.37 | 1.77E-03 | transcription_start_site | + | 16088  | 16088  | 144   | 4991 | AN10604 |

|      |          |        |        |      |          |                          |   |        |        |       |      |         |
|------|----------|--------|--------|------|----------|--------------------------|---|--------|--------|-------|------|---------|
| 463  | CONTIG83 | 16052  | 16413  | 2.37 | 1.77E-03 | transcription_start_site | + | 15850  | 15850  | 382   | 4990 | AN10604 |
| 463  | CONTIG83 | 16052  | 16413  | 2.37 | 1.77E-03 | transcription_start_site | + | 15177  | 15177  | 1055  | 4989 | AN10604 |
| 549  | CONTIG83 | 12766  | 13115  | 2.25 | 3.37E-03 | transcription_start_site | + | 14921  | 14921  | -1980 | 4988 | AN10604 |
| 549  | CONTIG83 | 12766  | 13115  | 2.25 | 3.37E-03 | transcription_start_site | + | 15177  | 15177  | -2236 | 4989 | AN10604 |
| 549  | CONTIG83 | 12766  | 13115  | 2.25 | 3.37E-03 | transcription_start_site | + | 15850  | 15850  | -2909 | 4990 | AN10604 |
| 549  | CONTIG83 | 12766  | 13115  | 2.25 | 3.37E-03 | transcription_start_site | + | 16088  | 16088  | -3147 | 4991 | AN10604 |
| 1760 | CONTIG83 | 14191  | 14610  | 1.1  | 1.22E-01 | transcription_start_site | + | 14921  | 14921  | -520  | 4988 | AN10604 |
| 1760 | CONTIG83 | 14191  | 14610  | 1.1  | 1.22E-01 | transcription_start_site | + | 15177  | 15177  | -776  | 4989 | AN10604 |
| 1760 | CONTIG83 | 14191  | 14610  | 1.1  | 1.22E-01 | transcription_start_site | + | 15850  | 15850  | -1449 | 4990 | AN10604 |
| 1760 | CONTIG83 | 14191  | 14610  | 1.1  | 1.22E-01 | transcription_start_site | + | 16088  | 16088  | -1687 | 4991 | AN10604 |
| 463  | CONTIG83 | 16052  | 16413  | 2.37 | 1.77E-03 | transcription_start_site | + | 21287  | 21287  | -5054 | 4992 | AN10605 |
| 463  | CONTIG83 | 16052  | 16413  | 2.37 | 1.77E-03 | transcription_start_site | + | 21409  | 21409  | -5176 | 4993 | AN10605 |
| 836  | CONTIG83 | 34367  | 34631  | 1.89 | 1.06E-02 | transcription_start_site | - | 34244  | 34244  | -255  | 5000 | AN10606 |
| 836  | CONTIG83 | 34367  | 34631  | 1.89 | 1.06E-02 | transcription_start_site | - | 34110  | 34110  | -389  | 5001 | AN10606 |
| 836  | CONTIG83 | 34367  | 34631  | 1.89 | 1.06E-02 | transcription_start_site | - | 35231  | 35231  | 732   | 4999 | AN10606 |
| 836  | CONTIG83 | 34367  | 34631  | 1.89 | 1.06E-02 | transcription_start_site | - | 35423  | 35423  | 924   | 4998 | AN10606 |
| 286  | CONTIG16 | 56330  | 56697  | 2.66 | 1.62E-03 | transcription_start_site | + | 57049  | 57049  | -535  | 5006 | AN1061  |
| 286  | CONTIG16 | 56330  | 56697  | 2.66 | 1.62E-03 | transcription_start_site | + | 57231  | 57231  | -717  | 5007 | AN1061  |
| 286  | CONTIG16 | 56330  | 56697  | 2.66 | 1.62E-03 | transcription_start_site | + | 57856  | 57856  | -1342 | 5008 | AN1061  |
| 1976 | CONTIG16 | 55584  | 56234  | 0.96 | 1.81E-01 | transcription_start_site | + | 57049  | 57049  | -1140 | 5006 | AN1061  |
| 1976 | CONTIG16 | 55584  | 56234  | 0.96 | 1.81E-01 | transcription_start_site | + | 57231  | 57231  | -1322 | 5007 | AN1061  |
| 1976 | CONTIG16 | 55584  | 56234  | 0.96 | 1.81E-01 | transcription_start_site | + | 57856  | 57856  | -1947 | 5008 | AN1061  |
| 647  | CONTIG84 | 149259 | 149693 | 2.11 | 4.92E-03 | transcription_start_site | + | 153421 | 153421 | -3945 | 5028 | AN10614 |
| 647  | CONTIG84 | 149259 | 149693 | 2.11 | 4.92E-03 | transcription_start_site | + | 153699 | 153699 | -4223 | 5029 | AN10614 |
| 647  | CONTIG84 | 149259 | 149693 | 2.11 | 4.92E-03 | transcription_start_site | + | 153841 | 153841 | -4365 | 5030 | AN10614 |
| 647  | CONTIG84 | 149259 | 149693 | 2.11 | 4.92E-03 | transcription_start_site | + | 154069 | 154069 | -4593 | 5031 | AN10614 |
| 647  | CONTIG84 | 149259 | 149693 | 2.11 | 4.92E-03 | transcription_start_site | + | 154273 | 154273 | -4797 | 5032 | AN10614 |
| 1156 | CONTIG84 | 149944 | 150731 | 1.57 | 5.36E-02 | transcription_start_site | + | 153421 | 153421 | -3083 | 5028 | AN10614 |
| 1156 | CONTIG84 | 149944 | 150731 | 1.57 | 5.36E-02 | transcription_start_site | + | 153699 | 153699 | -3361 | 5029 | AN10614 |
| 1156 | CONTIG84 | 149944 | 150731 | 1.57 | 5.36E-02 | transcription_start_site | + | 153841 | 153841 | -3503 | 5030 | AN10614 |
| 1156 | CONTIG84 | 149944 | 150731 | 1.57 | 5.36E-02 | transcription_start_site | + | 154069 | 154069 | -3731 | 5031 | AN10614 |
| 1156 | CONTIG84 | 149944 | 150731 | 1.57 | 5.36E-02 | transcription_start_site | + | 154273 | 154273 | -3935 | 5032 | AN10614 |
| 1404 | CONTIG84 | 151061 | 151332 | 1.35 | 9.60E-02 | transcription_start_site | + | 153421 | 153421 | -2224 | 5028 | AN10614 |
| 1404 | CONTIG84 | 151061 | 151332 | 1.35 | 9.60E-02 | transcription_start_site | + | 153699 | 153699 | -2502 | 5029 | AN10614 |
| 1404 | CONTIG84 | 151061 | 151332 | 1.35 | 9.60E-02 | transcription_start_site | + | 153841 | 153841 | -2644 | 5030 | AN10614 |
| 1404 | CONTIG84 | 151061 | 151332 | 1.35 | 9.60E-02 | transcription_start_site | + | 154069 | 154069 | -2872 | 5031 | AN10614 |
| 1404 | CONTIG84 | 151061 | 151332 | 1.35 | 9.60E-02 | transcription_start_site | + | 154273 | 154273 | -3076 | 5032 | AN10614 |
| 1727 | CONTIG84 | 153006 | 153370 | 1.12 | 1.76E-01 | transcription_start_site | + | 153421 | 153421 | -233  | 5028 | AN10614 |
| 1727 | CONTIG84 | 153006 | 153370 | 1.12 | 1.76E-01 | transcription_start_site | + | 153699 | 153699 | -511  | 5029 | AN10614 |
| 1727 | CONTIG84 | 153006 | 153370 | 1.12 | 1.76E-01 | transcription_start_site | + | 153841 | 153841 | -653  | 5030 | AN10614 |
| 1727 | CONTIG84 | 153006 | 153370 | 1.12 | 1.76E-01 | transcription_start_site | + | 154069 | 154069 | -881  | 5031 | AN10614 |
| 1727 | CONTIG84 | 153006 | 153370 | 1.12 | 1.76E-01 | transcription_start_site | + | 154273 | 154273 | -1085 | 5032 | AN10614 |
| 1157 | CONTIG84 | 172065 | 172404 | 1.57 | 5.36E-02 | transcription_start_site | - | 167491 | 167491 | -4743 | 5033 | AN10615 |
| 1157 | CONTIG84 | 172065 | 172404 | 1.57 | 5.36E-02 | transcription_start_site | - | 167288 | 167288 | -4946 | 5034 | AN10615 |
| 1256 | CONTIG84 | 2865   | 3212   | 1.48 | 6.74E-02 | transcription_start_site | + | 3578   | 3578   | -539  | 5040 | AN10616 |
| 1256 | CONTIG84 | 2865   | 3212   | 1.48 | 6.74E-02 | transcription_start_site | + | 3711   | 3711   | -672  | 5041 | AN10616 |
| 1598 | CONTIG84 | 96837  | 97426  | 1.21 | 1.38E-01 | transcription_start_site | - | 97360  | 97360  | 228   | 5046 | AN10619 |
| 1598 | CONTIG84 | 96837  | 97426  | 1.21 | 1.38E-01 | transcription_start_site | - | 96683  | 96683  | -448  | 5047 | AN10619 |
| 286  | CONTIG16 | 56330  | 56697  | 2.66 | 1.62E-03 | transcription_start_site | + | 59434  | 59434  | -2920 | 5048 | AN1062  |
| 286  | CONTIG16 | 56330  | 56697  | 2.66 | 1.62E-03 | transcription_start_site | + | 59623  | 59623  | -3109 | 5049 | AN1062  |
| 286  | CONTIG16 | 56330  | 56697  | 2.66 | 1.62E-03 | transcription_start_site | + | 59752  | 59752  | -3238 | 5050 | AN1062  |
| 286  | CONTIG16 | 56330  | 56697  | 2.66 | 1.62E-03 | transcription_start_site | + | 60460  | 60460  | -3946 | 5051 | AN1062  |
| 1976 | CONTIG16 | 55584  | 56234  | 0.96 | 1.81E-01 | transcription_start_site | + | 59434  | 59434  | -3525 | 5048 | AN1062  |
| 1976 | CONTIG16 | 55584  | 56234  | 0.96 | 1.81E-01 | transcription_start_site | + | 59623  | 59623  | -3714 | 5049 | AN1062  |
| 1976 | CONTIG16 | 55584  | 56234  | 0.96 | 1.81E-01 | transcription_start_site | + | 59752  | 59752  | -3843 | 5050 | AN1062  |
| 1976 | CONTIG16 | 55584  | 56234  | 0.96 | 1.81E-01 | transcription_start_site | + | 60460  | 60460  | -4551 | 5051 | AN1062  |
| 214  | CONTIG86 | 66470  | 67029  | 2.8  | 5.08E-03 | transcription_start_site | - | 62640  | 62640  | -4109 | 5067 | AN10625 |

|      |          |        |        |      |          |                          |   |        |        |       |      |         |
|------|----------|--------|--------|------|----------|--------------------------|---|--------|--------|-------|------|---------|
| 214  | CONTIG86 | 66470  | 67029  | 2.8  | 5.08E-03 | transcription_start_site | - | 62270  | 62270  | -4479 | 5068 | AN10625 |
| 232  | CONTIG86 | 74420  | 74766  | 2.75 | 6.24E-03 | transcription_start_site | + | 74783  | 74783  | -190  | 5070 | AN10626 |
| 1459 | CONTIG86 | 73205  | 74159  | 1.3  | 5.91E-02 | transcription_start_site | + | 74783  | 74783  | -1101 | 5070 | AN10626 |
| 1348 | CONTIG86 | 78612  | 80238  | 1.4  | 4.39E-02 | transcription_start_site | + | 81288  | 81288  | -1863 | 5077 | AN10628 |
| 1348 | CONTIG86 | 78612  | 80238  | 1.4  | 4.39E-02 | transcription_start_site | + | 81408  | 81408  | -1983 | 5078 | AN10628 |
| 1352 | CONTIG86 | 77102  | 77451  | 1.4  | 1.38E-01 | transcription_start_site | + | 81288  | 81288  | -4011 | 5077 | AN10628 |
| 1352 | CONTIG86 | 77102  | 77451  | 1.4  | 1.38E-01 | transcription_start_site | + | 81408  | 81408  | -4131 | 5078 | AN10628 |
| 232  | CONTIG86 | 74420  | 74766  | 2.75 | 6.24E-03 | transcription_start_site | + | 79549  | 79549  | -4956 | 5079 | AN10629 |
| 232  | CONTIG86 | 74420  | 74766  | 2.75 | 6.24E-03 | transcription_start_site | + | 79755  | 79755  | -5162 | 5080 | AN10629 |
| 1348 | CONTIG86 | 78612  | 80238  | 1.4  | 4.39E-02 | transcription_start_site | + | 79549  | 79549  | -124  | 5079 | AN10629 |
| 1348 | CONTIG86 | 78612  | 80238  | 1.4  | 4.39E-02 | transcription_start_site | + | 79755  | 79755  | -330  | 5080 | AN10629 |
| 1348 | CONTIG86 | 78612  | 80238  | 1.4  | 4.39E-02 | transcription_start_site | + | 80668  | 80668  | -1243 | 5081 | AN10629 |
| 1352 | CONTIG86 | 77102  | 77451  | 1.4  | 1.38E-01 | transcription_start_site | + | 79549  | 79549  | -2272 | 5079 | AN10629 |
| 1352 | CONTIG86 | 77102  | 77451  | 1.4  | 1.38E-01 | transcription_start_site | + | 79755  | 79755  | -2478 | 5080 | AN10629 |
| 1352 | CONTIG86 | 77102  | 77451  | 1.4  | 1.38E-01 | transcription_start_site | + | 80668  | 80668  | -3391 | 5081 | AN10629 |
| 1302 | CONTIG16 | 66685  | 67048  | 1.44 | 6.74E-02 | transcription_start_site | - | 62090  | 62090  | -4776 | 5082 | AN1063  |
| 1302 | CONTIG16 | 66685  | 67048  | 1.44 | 6.74E-02 | transcription_start_site | - | 61972  | 61972  | -4894 | 5083 | AN1063  |
| 1017 | CONTIG86 | 96396  | 96732  | 1.71 | 6.74E-02 | transcription_start_site | + | 95909  | 95909  | 655   | 5088 | AN10630 |
| 1017 | CONTIG86 | 96396  | 96732  | 1.71 | 6.74E-02 | transcription_start_site | + | 95616  | 95616  | 948   | 5087 | AN10630 |
| 232  | CONTIG86 | 74420  | 74766  | 2.75 | 6.24E-03 | transcription_start_site | + | 74090  | 74090  | 503   | 5091 | AN10631 |
| 232  | CONTIG86 | 74420  | 74766  | 2.75 | 6.24E-03 | transcription_start_site | + | 73897  | 73897  | 696   | 5090 | AN10631 |
| 232  | CONTIG86 | 74420  | 74766  | 2.75 | 6.24E-03 | transcription_start_site | + | 73656  | 73656  | 937   | 5089 | AN10631 |
| 1459 | CONTIG86 | 73205  | 74159  | 1.3  | 5.91E-02 | transcription_start_site | + | 73656  | 73656  | 26    | 5089 | AN10631 |
| 1459 | CONTIG86 | 73205  | 74159  | 1.3  | 5.91E-02 | transcription_start_site | + | 73897  | 73897  | -215  | 5090 | AN10631 |
| 1459 | CONTIG86 | 73205  | 74159  | 1.3  | 5.91E-02 | transcription_start_site | + | 74090  | 74090  | -408  | 5091 | AN10631 |
| 2374 | CONTIG87 | 3452   | 3900   | 0.41 | 1.76E-01 | transcription_start_site | + | 8066   | 8066   | -4390 | 5092 | AN10632 |
| 2374 | CONTIG87 | 3452   | 3900   | 0.41 | 1.76E-01 | transcription_start_site | + | 8640   | 8640   | -4964 | 5093 | AN10632 |
| 1584 | CONTIG88 | 113476 | 113900 | 1.21 | 2.30E-02 | transcription_start_site | + | 113762 | 113762 | -74   | 5096 | AN10634 |
| 1584 | CONTIG88 | 113476 | 113900 | 1.21 | 2.30E-02 | transcription_start_site | + | 114016 | 114016 | -328  | 5097 | AN10634 |
| 1787 | CONTIG88 | 131851 | 132290 | 1.08 | 7.66E-02 | transcription_start_site | - | 132058 | 132058 | -12   | 5106 | AN10636 |
| 1787 | CONTIG88 | 131851 | 132290 | 1.08 | 7.66E-02 | transcription_start_site | - | 131521 | 131521 | -549  | 5107 | AN10636 |
| 1787 | CONTIG88 | 131851 | 132290 | 1.08 | 7.66E-02 | transcription_start_site | + | 132604 | 132604 | -533  | 5108 | AN10637 |
| 1787 | CONTIG88 | 131851 | 132290 | 1.08 | 7.66E-02 | transcription_start_site | + | 134865 | 134865 | -2794 | 5109 | AN10637 |
| 874  | CONTIG88 | 139581 | 139935 | 1.86 | 4.57E-03 | transcription_start_site | + | 143713 | 143713 | -3955 | 5110 | AN10638 |
| 874  | CONTIG88 | 139581 | 139935 | 1.86 | 4.57E-03 | transcription_start_site | + | 143865 | 143865 | -4107 | 5111 | AN10638 |
| 874  | CONTIG88 | 139581 | 139935 | 1.86 | 4.57E-03 | transcription_start_site | + | 144328 | 144328 | -4570 | 5112 | AN10638 |
| 874  | CONTIG88 | 139581 | 139935 | 1.86 | 4.57E-03 | transcription_start_site | + | 144587 | 144587 | -4829 | 5113 | AN10638 |
| 874  | CONTIG88 | 139581 | 139935 | 1.86 | 4.57E-03 | transcription_start_site | + | 144668 | 144668 | -4910 | 5114 | AN10638 |
| 1891 | CONTIG88 | 141236 | 141655 | 1.01 | 9.60E-02 | transcription_start_site | + | 143713 | 143713 | -2267 | 5110 | AN10638 |
| 1891 | CONTIG88 | 141236 | 141655 | 1.01 | 9.60E-02 | transcription_start_site | + | 143865 | 143865 | -2419 | 5111 | AN10638 |
| 1891 | CONTIG88 | 141236 | 141655 | 1.01 | 9.60E-02 | transcription_start_site | + | 144328 | 144328 | -2882 | 5112 | AN10638 |
| 1891 | CONTIG88 | 141236 | 141655 | 1.01 | 9.60E-02 | transcription_start_site | + | 144587 | 144587 | -3141 | 5113 | AN10638 |
| 1891 | CONTIG88 | 141236 | 141655 | 1.01 | 9.60E-02 | transcription_start_site | + | 144668 | 144668 | -3222 | 5114 | AN10638 |
| 1891 | CONTIG88 | 141236 | 141655 | 1.01 | 9.60E-02 | transcription_start_site | + | 146001 | 146001 | -4555 | 5115 | AN10638 |
| 1891 | CONTIG88 | 141236 | 141655 | 1.01 | 9.60E-02 | transcription_start_site | + | 146215 | 146215 | -4769 | 5116 | AN10638 |
| 1787 | CONTIG88 | 131851 | 132290 | 1.08 | 7.66E-02 | transcription_start_site | + | 135583 | 135583 | -3512 | 5126 | AN10641 |
| 1787 | CONTIG88 | 131851 | 132290 | 1.08 | 7.66E-02 | transcription_start_site | + | 135696 | 135696 | -3625 | 5127 | AN10641 |
| 1787 | CONTIG88 | 131851 | 132290 | 1.08 | 7.66E-02 | transcription_start_site | + | 136030 | 136030 | -3959 | 5128 | AN10641 |
| 1787 | CONTIG88 | 131851 | 132290 | 1.08 | 7.66E-02 | transcription_start_site | - | 130427 | 130427 | -1643 | 5131 | AN10643 |
| 1787 | CONTIG88 | 131851 | 132290 | 1.08 | 7.66E-02 | transcription_start_site | - | 130267 | 130267 | -1803 | 5132 | AN10643 |
| 1787 | CONTIG88 | 131851 | 132290 | 1.08 | 7.66E-02 | transcription_start_site | - | 130123 | 130123 | -1947 | 5133 | AN10643 |
| 1787 | CONTIG88 | 131851 | 132290 | 1.08 | 7.66E-02 | transcription_start_site | - | 129982 | 129982 | -2088 | 5134 | AN10643 |
| 618  | CONTIG88 | 159244 | 159593 | 2.16 | 8.43E-04 | transcription_start_site | - | 154246 | 154246 | -5172 | 5135 | AN10644 |
| 370  | CONTIG88 | 172355 | 172629 | 2.5  | 0.00E+00 | transcription_start_site | + | 176625 | 176625 | -4133 | 5140 | AN10646 |
| 370  | CONTIG88 | 172355 | 172629 | 2.5  | 0.00E+00 | transcription_start_site | + | 177609 | 177609 | -5117 | 5141 | AN10646 |
| 1584 | CONTIG88 | 113476 | 113900 | 1.21 | 2.30E-02 | transcription_start_site | + | 116653 | 116653 | -2965 | 5142 | AN10647 |
| 1584 | CONTIG88 | 113476 | 113900 | 1.21 | 2.30E-02 | transcription_start_site | + | 116935 | 116935 | -3247 | 5143 | AN10647 |



|      |          |        |        |      |          |                          |   |        |        |       |      |         |
|------|----------|--------|--------|------|----------|--------------------------|---|--------|--------|-------|------|---------|
| 798  | CONTIG89 | 268440 | 268929 | 1.94 | 2.61E-03 | transcription_start_site | - | 269542 | 269542 | 857   | 5152 | AN10649 |
| 798  | CONTIG89 | 268440 | 268929 | 1.94 | 2.61E-03 | transcription_start_site | - | 269646 | 269646 | 961   | 5151 | AN10649 |
| 798  | CONTIG89 | 268440 | 268929 | 1.94 | 2.61E-03 | transcription_start_site | - | 269820 | 269820 | 1135  | 5150 | AN10649 |
| 1302 | CONTIG16 | 66685  | 67048  | 1.44 | 6.74E-02 | transcription_start_site | + | 66341  | 66341  | 525   | 5156 | AN1065  |
| 1302 | CONTIG16 | 66685  | 67048  | 1.44 | 6.74E-02 | transcription_start_site | + | 65795  | 65795  | 1071  | 5155 | AN1065  |
| 2143 | CONTIG89 | 162460 | 163184 | 0.84 | 9.04E-02 | transcription_start_site | - | 162314 | 162314 | -508  | 5161 | AN10651 |
| 2143 | CONTIG89 | 162460 | 163184 | 0.84 | 9.04E-02 | transcription_start_site | - | 162232 | 162232 | -590  | 5162 | AN10651 |
| 2143 | CONTIG89 | 162460 | 163184 | 0.84 | 9.04E-02 | transcription_start_site | - | 162114 | 162114 | -708  | 5163 | AN10651 |
| 2143 | CONTIG89 | 162460 | 163184 | 0.84 | 9.04E-02 | transcription_start_site | - | 161900 | 161900 | -922  | 5164 | AN10651 |
| 2356 | CONTIG92 | 34668  | 35687  | 0.51 | 1.97E-01 | transcription_start_site | - | 32673  | 32673  | -2504 | 5174 | AN10655 |
| 1302 | CONTIG16 | 66685  | 67048  | 1.44 | 6.74E-02 | transcription_start_site | + | 67043  | 67043  | -176  | 5184 | AN1066  |
| 1302 | CONTIG16 | 66685  | 67048  | 1.44 | 6.74E-02 | transcription_start_site | + | 67163  | 67163  | -296  | 5185 | AN1066  |
| 285  | CONTIG93 | 264920 | 265554 | 2.66 | 2.26E-04 | transcription_start_site | - | 260351 | 260351 | -4886 | 5192 | AN10662 |
| 285  | CONTIG93 | 264920 | 265554 | 2.66 | 2.26E-04 | transcription_start_site | - | 260169 | 260169 | -5068 | 5193 | AN10662 |
| 285  | CONTIG93 | 264920 | 265554 | 2.66 | 2.26E-04 | transcription_start_site | - | 260094 | 260094 | -5143 | 5194 | AN10662 |
| 1042 | CONTIG93 | 258230 | 258504 | 1.68 | 2.05E-02 | transcription_start_site | - | 259069 | 259069 | 702   | 5198 | AN10662 |
| 1042 | CONTIG93 | 258230 | 258504 | 1.68 | 2.05E-02 | transcription_start_site | - | 258033 | 258033 | -334  | 5201 | AN10664 |
| 1042 | CONTIG93 | 258230 | 258504 | 1.68 | 2.05E-02 | transcription_start_site | - | 257824 | 257824 | -543  | 5202 | AN10664 |
| 1041 | CONTIG93 | 25518  | 25927  | 1.68 | 2.05E-02 | transcription_start_site | - | 21307  | 21307  | -4415 | 5203 | AN10665 |
| 1041 | CONTIG93 | 25518  | 25927  | 1.68 | 2.05E-02 | transcription_start_site | - | 21069  | 21069  | -4653 | 5204 | AN10665 |
| 1041 | CONTIG93 | 25518  | 25927  | 1.68 | 2.05E-02 | transcription_start_site | - | 20891  | 20891  | -4831 | 5205 | AN10665 |
| 1041 | CONTIG93 | 25518  | 25927  | 1.68 | 2.05E-02 | transcription_start_site | - | 20776  | 20776  | -4946 | 5206 | AN10665 |
| 1041 | CONTIG93 | 25518  | 25927  | 1.68 | 2.05E-02 | transcription_start_site | - | 20655  | 20655  | -5067 | 5207 | AN10665 |
| 676  | CONTIG94 | 14329  | 14753  | 2.07 | 8.43E-04 | transcription_start_site | + | 13336  | 13336  | 1205  | 5228 | AN10671 |
| 2146 | CONTIG94 | 25294  | 25645  | 0.84 | 1.54E-01 | transcription_start_site | + | 27294  | 27294  | -1824 | 5229 | AN10672 |
| 2146 | CONTIG94 | 25294  | 25645  | 0.84 | 1.54E-01 | transcription_start_site | + | 27507  | 27507  | -2037 | 5230 | AN10672 |
| 2146 | CONTIG94 | 25294  | 25645  | 0.84 | 1.54E-01 | transcription_start_site | + | 27587  | 27587  | -2117 | 5231 | AN10672 |
| 2146 | CONTIG94 | 25294  | 25645  | 0.84 | 1.54E-01 | transcription_start_site | + | 27757  | 27757  | -2287 | 5232 | AN10672 |
| 2146 | CONTIG94 | 25294  | 25645  | 0.84 | 1.54E-01 | transcription_start_site | + | 28638  | 28638  | -3168 | 5233 | AN10672 |
| 2146 | CONTIG94 | 25294  | 25645  | 0.84 | 1.54E-01 | transcription_start_site | + | 29383  | 29383  | -3913 | 5234 | AN10672 |
| 963  | CONTIG94 | 442818 | 443244 | 1.75 | 5.08E-03 | transcription_start_site | - | 440647 | 440647 | -2384 | 5244 | AN10676 |
| 963  | CONTIG94 | 442818 | 443244 | 1.75 | 5.08E-03 | transcription_start_site | - | 440495 | 440495 | -2536 | 5245 | AN10676 |
| 963  | CONTIG94 | 442818 | 443244 | 1.75 | 5.08E-03 | transcription_start_site | - | 440404 | 440404 | -2627 | 5246 | AN10676 |
| 963  | CONTIG94 | 442818 | 443244 | 1.75 | 5.08E-03 | transcription_start_site | - | 439380 | 439380 | -3651 | 5247 | AN10676 |
| 1244 | CONTIG94 | 440703 | 441069 | 1.49 | 1.37E-02 | transcription_start_site | - | 440647 | 440647 | -239  | 5244 | AN10676 |
| 1244 | CONTIG94 | 440703 | 441069 | 1.49 | 1.37E-02 | transcription_start_site | - | 440495 | 440495 | -391  | 5245 | AN10676 |
| 1244 | CONTIG94 | 440703 | 441069 | 1.49 | 1.37E-02 | transcription_start_site | - | 440404 | 440404 | -482  | 5246 | AN10676 |
| 1244 | CONTIG94 | 440703 | 441069 | 1.49 | 1.37E-02 | transcription_start_site | - | 439380 | 439380 | -1506 | 5247 | AN10676 |
| 1385 | CONTIG94 | 444683 | 445037 | 1.36 | 2.29E-02 | transcription_start_site | - | 440647 | 440647 | -4213 | 5244 | AN10676 |
| 1385 | CONTIG94 | 444683 | 445037 | 1.36 | 2.29E-02 | transcription_start_site | - | 440495 | 440495 | -4365 | 5245 | AN10676 |
| 1385 | CONTIG94 | 444683 | 445037 | 1.36 | 2.29E-02 | transcription_start_site | - | 440404 | 440404 | -4456 | 5246 | AN10676 |
| 2117 | CONTIG94 | 443778 | 444279 | 0.87 | 1.38E-01 | transcription_start_site | - | 440647 | 440647 | -3381 | 5244 | AN10676 |
| 2117 | CONTIG94 | 443778 | 444279 | 0.87 | 1.38E-01 | transcription_start_site | - | 440495 | 440495 | -3533 | 5245 | AN10676 |
| 2117 | CONTIG94 | 443778 | 444279 | 0.87 | 1.38E-01 | transcription_start_site | - | 440404 | 440404 | -3624 | 5246 | AN10676 |
| 2117 | CONTIG94 | 443778 | 444279 | 0.87 | 1.38E-01 | transcription_start_site | - | 439380 | 439380 | -4648 | 5247 | AN10676 |
| 797  | CONTIG94 | 474157 | 474726 | 1.94 | 1.77E-03 | transcription_start_site | + | 477222 | 477222 | -2780 | 5248 | AN10677 |
| 797  | CONTIG94 | 474157 | 474726 | 1.94 | 1.77E-03 | transcription_start_site | + | 477625 | 477625 | -3183 | 5249 | AN10677 |
| 797  | CONTIG94 | 474157 | 474726 | 1.94 | 1.77E-03 | transcription_start_site | + | 477699 | 477699 | -3257 | 5250 | AN10677 |
| 797  | CONTIG94 | 474157 | 474726 | 1.94 | 1.77E-03 | transcription_start_site | + | 477761 | 477761 | -3319 | 5251 | AN10677 |
| 797  | CONTIG94 | 474157 | 474726 | 1.94 | 1.77E-03 | transcription_start_site | + | 478429 | 478429 | -3987 | 5252 | AN10677 |
| 797  | CONTIG94 | 474157 | 474726 | 1.94 | 1.77E-03 | transcription_start_site | + | 478566 | 478566 | -4124 | 5253 | AN10677 |
| 797  | CONTIG94 | 474157 | 474726 | 1.94 | 1.77E-03 | transcription_start_site | + | 478736 | 478736 | -4294 | 5254 | AN10677 |
| 2146 | CONTIG94 | 25294  | 25645  | 0.84 | 1.54E-01 | transcription_start_site | + | 30321  | 30321  | -4851 | 5258 | AN10679 |
| 2146 | CONTIG94 | 25294  | 25645  | 0.84 | 1.54E-01 | transcription_start_site | + | 30446  | 30446  | -4976 | 5259 | AN10679 |
| 1302 | CONTIG16 | 66685  | 67048  | 1.44 | 6.74E-02 | transcription_start_site | + | 69467  | 69467  | -2600 | 5260 | AN1068  |
| 1302 | CONTIG16 | 66685  | 67048  | 1.44 | 6.74E-02 | transcription_start_site | + | 69652  | 69652  | -2785 | 5261 | AN1068  |
| 1302 | CONTIG16 | 66685  | 67048  | 1.44 | 6.74E-02 | transcription_start_site | + | 69857  | 69857  | -2990 | 5262 | AN1068  |

|      |          |        |        |      |          |                          |   |        |        |       |      |         |
|------|----------|--------|--------|------|----------|--------------------------|---|--------|--------|-------|------|---------|
| 676  | CONTIG94 | 14329  | 14753  | 2.07 | 8.43E-04 | transcription_start_site | + | 13584  | 13584  | 957   | 5294 | AN10688 |
| 676  | CONTIG94 | 14329  | 14753  | 2.07 | 8.43E-04 | transcription_start_site | + | 13496  | 13496  | 1045  | 5293 | AN10688 |
| 963  | CONTIG94 | 442818 | 443244 | 1.75 | 5.08E-03 | transcription_start_site | - | 443779 | 443779 | 748   | 5295 | AN10689 |
| 963  | CONTIG94 | 442818 | 443244 | 1.75 | 5.08E-03 | transcription_start_site | - | 441317 | 441317 | -1714 | 5296 | AN10689 |
| 1244 | CONTIG94 | 440703 | 441069 | 1.49 | 1.37E-02 | transcription_start_site | - | 441317 | 441317 | 431   | 5296 | AN10689 |
| 1385 | CONTIG94 | 444683 | 445037 | 1.36 | 2.29E-02 | transcription_start_site | - | 443779 | 443779 | -1081 | 5295 | AN10689 |
| 1385 | CONTIG94 | 444683 | 445037 | 1.36 | 2.29E-02 | transcription_start_site | - | 441317 | 441317 | -3543 | 5296 | AN10689 |
| 2117 | CONTIG94 | 443778 | 444279 | 0.87 | 1.38E-01 | transcription_start_site | - | 443779 | 443779 | -249  | 5295 | AN10689 |
| 2117 | CONTIG94 | 443778 | 444279 | 0.87 | 1.38E-01 | transcription_start_site | - | 441317 | 441317 | -2711 | 5296 | AN10689 |
| 1678 | CONTIG95 | 40818  | 41326  | 1.15 | 6.50E-02 | transcription_start_site | - | 42088  | 42088  | 1016  | 5339 | AN10699 |
| 1914 | CONTIG98 | 297992 | 298326 | 1    | 1.97E-01 | transcription_start_site | - | 297779 | 297779 | -380  | 5351 | AN10703 |
| 269  | CONTIG98 | 470562 | 471051 | 2.68 | 8.43E-04 | transcription_start_site | - | 467731 | 467731 | -3075 | 5352 | AN10704 |
| 269  | CONTIG98 | 470562 | 471051 | 2.68 | 8.43E-04 | transcription_start_site | - | 467567 | 467567 | -3239 | 5353 | AN10704 |
| 269  | CONTIG98 | 470562 | 471051 | 2.68 | 8.43E-04 | transcription_start_site | - | 467014 | 467014 | -3792 | 5354 | AN10704 |
| 1054 | CONTIG98 | 477378 | 477667 | 1.67 | 3.01E-02 | transcription_start_site | + | 477718 | 477718 | -195  | 5356 | AN10706 |
| 1054 | CONTIG98 | 477378 | 477667 | 1.67 | 3.01E-02 | transcription_start_site | + | 477778 | 477778 | -255  | 5357 | AN10706 |
| 1054 | CONTIG98 | 477378 | 477667 | 1.67 | 3.01E-02 | transcription_start_site | + | 477841 | 477841 | -318  | 5358 | AN10706 |
| 1054 | CONTIG98 | 477378 | 477667 | 1.67 | 3.01E-02 | transcription_start_site | + | 477954 | 477954 | -431  | 5359 | AN10706 |
| 853  | CONTIG98 | 544132 | 544416 | 1.88 | 1.54E-02 | transcription_start_site | - | 544022 | 544022 | -252  | 5366 | AN10709 |
| 853  | CONTIG98 | 544132 | 544416 | 1.88 | 1.54E-02 | transcription_start_site | - | 543959 | 543959 | -315  | 5367 | AN10709 |
| 853  | CONTIG98 | 544132 | 544416 | 1.88 | 1.54E-02 | transcription_start_site | - | 543752 | 543752 | -522  | 5368 | AN10709 |
| 853  | CONTIG98 | 544132 | 544416 | 1.88 | 1.54E-02 | transcription_start_site | - | 543420 | 543420 | -854  | 5369 | AN10709 |
| 853  | CONTIG98 | 544132 | 544416 | 1.88 | 1.54E-02 | transcription_start_site | - | 541971 | 541971 | -2303 | 5370 | AN10709 |
| 1054 | CONTIG98 | 477378 | 477667 | 1.67 | 3.01E-02 | transcription_start_site | + | 479004 | 479004 | -1481 | 5373 | AN10710 |
| 1054 | CONTIG98 | 477378 | 477667 | 1.67 | 3.01E-02 | transcription_start_site | + | 479179 | 479179 | -1656 | 5374 | AN10710 |
| 1054 | CONTIG98 | 477378 | 477667 | 1.67 | 3.01E-02 | transcription_start_site | + | 479297 | 479297 | -1774 | 5375 | AN10710 |
| 1054 | CONTIG98 | 477378 | 477667 | 1.67 | 3.01E-02 | transcription_start_site | + | 479665 | 479665 | -2142 | 5376 | AN10710 |
| 1054 | CONTIG98 | 477378 | 477667 | 1.67 | 3.01E-02 | transcription_start_site | + | 479799 | 479799 | -2276 | 5377 | AN10710 |
| 1054 | CONTIG98 | 477378 | 477667 | 1.67 | 3.01E-02 | transcription_start_site | + | 480462 | 480462 | -2939 | 5378 | AN10711 |
| 1054 | CONTIG98 | 477378 | 477667 | 1.67 | 3.01E-02 | transcription_start_site | + | 481083 | 481083 | -3560 | 5379 | AN10711 |
| 1054 | CONTIG98 | 477378 | 477667 | 1.67 | 3.01E-02 | transcription_start_site | + | 481467 | 481467 | -3944 | 5380 | AN10711 |
| 1975 | CONTIG98 | 282830 | 283419 | 0.96 | 1.57E-01 | transcription_start_site | - | 279846 | 279846 | -3278 | 5387 | AN10713 |
| 1975 | CONTIG98 | 282830 | 283419 | 0.96 | 1.57E-01 | transcription_start_site | - | 279302 | 279302 | -3822 | 5388 | AN10713 |
| 1975 | CONTIG98 | 282830 | 283419 | 0.96 | 1.57E-01 | transcription_start_site | - | 278821 | 278821 | -4303 | 5389 | AN10713 |
| 1914 | CONTIG98 | 297992 | 298326 | 1    | 1.97E-01 | transcription_start_site | - | 299317 | 299317 | 1158  | 5390 | AN10714 |
| 1054 | CONTIG98 | 477378 | 477667 | 1.67 | 3.01E-02 | transcription_start_site | + | 482302 | 482302 | -4779 | 5391 | AN10715 |
| 853  | CONTIG98 | 544132 | 544416 | 1.88 | 1.54E-02 | transcription_start_site | - | 541069 | 541069 | -3205 | 5400 | AN10718 |
| 853  | CONTIG98 | 544132 | 544416 | 1.88 | 1.54E-02 | transcription_start_site | - | 540975 | 540975 | -3299 | 5401 | AN10718 |
| 853  | CONTIG98 | 544132 | 544416 | 1.88 | 1.54E-02 | transcription_start_site | - | 540712 | 540712 | -3562 | 5402 | AN10718 |
| 611  | CONTIG98 | 553126 | 553420 | 2.18 | 7.08E-03 | transcription_start_site | + | 554118 | 554118 | -845  | 5403 | AN10719 |
| 611  | CONTIG98 | 553126 | 553420 | 2.18 | 7.08E-03 | transcription_start_site | + | 554278 | 554278 | -1005 | 5404 | AN10719 |
| 611  | CONTIG98 | 553126 | 553420 | 2.18 | 7.08E-03 | transcription_start_site | + | 554456 | 554456 | -1183 | 5405 | AN10719 |
| 611  | CONTIG98 | 553126 | 553420 | 2.18 | 7.08E-03 | transcription_start_site | - | 552138 | 552138 | -1135 | 5416 | AN10721 |
| 611  | CONTIG98 | 553126 | 553420 | 2.18 | 7.08E-03 | transcription_start_site | - | 551877 | 551877 | -1396 | 5417 | AN10721 |
| 727  | CONTIG98 | 210002 | 211111 | 2.01 | 1.03E-03 | transcription_start_site | - | 207212 | 207212 | -3344 | 5418 | AN10722 |
| 727  | CONTIG98 | 210002 | 211111 | 2.01 | 1.03E-03 | transcription_start_site | - | 206918 | 206918 | -3638 | 5419 | AN10722 |
| 727  | CONTIG98 | 210002 | 211111 | 2.01 | 1.03E-03 | transcription_start_site | - | 206651 | 206651 | -3905 | 5420 | AN10722 |
| 727  | CONTIG98 | 210002 | 211111 | 2.01 | 1.03E-03 | transcription_start_site | - | 206552 | 206552 | -4004 | 5421 | AN10722 |
| 727  | CONTIG98 | 210002 | 211111 | 2.01 | 1.03E-03 | transcription_start_site | - | 206099 | 206099 | -4457 | 5422 | AN10722 |
| 727  | CONTIG98 | 210002 | 211111 | 2.01 | 1.03E-03 | transcription_start_site | - | 205957 | 205957 | -4599 | 5423 | AN10722 |
| 727  | CONTIG98 | 210002 | 211111 | 2.01 | 1.03E-03 | transcription_start_site | - | 205361 | 205361 | -5195 | 5424 | AN10722 |
| 1054 | CONTIG98 | 477378 | 477667 | 1.67 | 3.01E-02 | transcription_start_site | - | 472866 | 472866 | -4656 | 5431 | AN10724 |
| 511  | CONTIG98 | 427813 | 428302 | 2.3  | 4.57E-03 | transcription_start_site | + | 431937 | 431937 | -3879 | 5432 | AN10725 |
| 32   | CONTIG98 | 436355 | 436939 | 3.35 | 0.00E+00 | transcription_start_site | + | 438739 | 438739 | -2092 | 5433 | AN10726 |
| 576  | CONTIG98 | 435003 | 435442 | 2.22 | 6.24E-03 | transcription_start_site | + | 438739 | 438739 | -3516 | 5433 | AN10726 |
| 734  | CONTIG98 | 433953 | 434392 | 2.01 | 4.22E-03 | transcription_start_site | + | 438739 | 438739 | -4566 | 5433 | AN10726 |
| 32   | CONTIG98 | 436355 | 436939 | 3.35 | 0.00E+00 | transcription_start_site | + | 440867 | 440867 | -4220 | 5434 | AN10727 |

|      |           |        |        |      |          |                          |   |        |        |       |      |         |
|------|-----------|--------|--------|------|----------|--------------------------|---|--------|--------|-------|------|---------|
| 1837 | CONTIG98  | 510396 | 511178 | 1.05 | 9.04E-02 | transcription_start_site | - | 509767 | 509767 | -1020 | 5435 | AN10728 |
| 1837 | CONTIG98  | 510396 | 511178 | 1.05 | 9.04E-02 | transcription_start_site | - | 509667 | 509667 | -1120 | 5436 | AN10728 |
| 269  | CONTIG98  | 470562 | 471051 | 2.68 | 8.43E-04 | transcription_start_site | - | 465885 | 465885 | -4921 | 5443 | AN10730 |
| 269  | CONTIG98  | 470562 | 471051 | 2.68 | 8.43E-04 | transcription_start_site | - | 465761 | 465761 | -5045 | 5444 | AN10730 |
| 269  | CONTIG98  | 470562 | 471051 | 2.68 | 8.43E-04 | transcription_start_site | - | 465622 | 465622 | -5184 | 5445 | AN10730 |
| 1912 | CONTIG100 | 23028  | 23767  | 1    | 1.97E-01 | transcription_start_site | - | 22636  | 22636  | -761  | 5448 | AN10732 |
| 1912 | CONTIG100 | 23028  | 23767  | 1    | 1.97E-01 | transcription_start_site | - | 22030  | 22030  | -1367 | 5449 | AN10732 |
| 585  | CONTIG100 | 194927 | 195281 | 2.21 | 6.24E-03 | transcription_start_site | + | 195680 | 195680 | -576  | 5463 | AN10735 |
| 37   | CONTIG100 | 218718 | 219209 | 3.3  | 0.00E+00 | transcription_start_site | - | 216760 | 216760 | -2203 | 5464 | AN10736 |
| 37   | CONTIG100 | 218718 | 219209 | 3.3  | 0.00E+00 | transcription_start_site | - | 216055 | 216055 | -2908 | 5465 | AN10736 |
| 37   | CONTIG100 | 218718 | 219209 | 3.3  | 0.00E+00 | transcription_start_site | - | 215666 | 215666 | -3297 | 5466 | AN10736 |
| 1912 | CONTIG100 | 23028  | 23767  | 1    | 1.97E-01 | transcription_start_site | - | 23735  | 23735  | 337   | 5468 | AN10738 |
| 548  | CONTIG100 | 262291 | 262705 | 2.25 | 2.65E-03 | transcription_start_site | + | 263339 | 263339 | -841  | 5479 | AN10742 |
| 510  | CONTIG100 | 250886 | 251231 | 2.3  | 4.57E-03 | transcription_start_site | - | 249162 | 249162 | -1896 | 5480 | AN10743 |
| 510  | CONTIG100 | 250886 | 251231 | 2.3  | 4.57E-03 | transcription_start_site | - | 249010 | 249010 | -2048 | 5481 | AN10743 |
| 510  | CONTIG100 | 250886 | 251231 | 2.3  | 4.57E-03 | transcription_start_site | - | 248805 | 248805 | -2253 | 5482 | AN10743 |
| 510  | CONTIG100 | 250886 | 251231 | 2.3  | 4.57E-03 | transcription_start_site | - | 248197 | 248197 | -2861 | 5483 | AN10743 |
| 510  | CONTIG100 | 250886 | 251231 | 2.3  | 4.57E-03 | transcription_start_site | - | 248015 | 248015 | -3043 | 5484 | AN10743 |
| 1597 | CONTIG100 | 106821 | 107320 | 1.21 | 1.08E-01 | transcription_start_site | + | 107680 | 107680 | -609  | 5485 | AN10744 |
| 1659 | CONTIG100 | 108011 | 108275 | 1.17 | 1.22E-01 | transcription_start_site | + | 107680 | 107680 | 463   | 5485 | AN10744 |
| 1597 | CONTIG100 | 106821 | 107320 | 1.21 | 1.08E-01 | transcription_start_site | + | 107973 | 107973 | -902  | 5486 | AN10745 |
| 1597 | CONTIG100 | 106821 | 107320 | 1.21 | 1.08E-01 | transcription_start_site | + | 108399 | 108399 | -1328 | 5487 | AN10745 |
| 1597 | CONTIG100 | 106821 | 107320 | 1.21 | 1.08E-01 | transcription_start_site | + | 108509 | 108509 | -1438 | 5488 | AN10745 |
| 1597 | CONTIG100 | 106821 | 107320 | 1.21 | 1.08E-01 | transcription_start_site | + | 108649 | 108649 | -1578 | 5489 | AN10745 |
| 1597 | CONTIG100 | 106821 | 107320 | 1.21 | 1.08E-01 | transcription_start_site | + | 108833 | 108833 | -1762 | 5490 | AN10745 |
| 1659 | CONTIG100 | 108011 | 108275 | 1.17 | 1.22E-01 | transcription_start_site | + | 107973 | 107973 | 170   | 5486 | AN10745 |
| 1659 | CONTIG100 | 108011 | 108275 | 1.17 | 1.22E-01 | transcription_start_site | + | 108399 | 108399 | -256  | 5487 | AN10745 |
| 1659 | CONTIG100 | 108011 | 108275 | 1.17 | 1.22E-01 | transcription_start_site | + | 108509 | 108509 | -366  | 5488 | AN10745 |
| 1659 | CONTIG100 | 108011 | 108275 | 1.17 | 1.22E-01 | transcription_start_site | + | 108649 | 108649 | -506  | 5489 | AN10745 |
| 1659 | CONTIG100 | 108011 | 108275 | 1.17 | 1.22E-01 | transcription_start_site | + | 108833 | 108833 | -690  | 5490 | AN10745 |
| 1321 | CONTIG100 | 111391 | 111725 | 1.42 | 3.02E-02 | transcription_start_site | + | 110442 | 110442 | 1116  | 5492 | AN10746 |
| 1597 | CONTIG100 | 106821 | 107320 | 1.21 | 1.08E-01 | transcription_start_site | + | 110315 | 110315 | -3244 | 5491 | AN10746 |
| 1597 | CONTIG100 | 106821 | 107320 | 1.21 | 1.08E-01 | transcription_start_site | + | 110442 | 110442 | -3371 | 5492 | AN10746 |
| 1659 | CONTIG100 | 108011 | 108275 | 1.17 | 1.22E-01 | transcription_start_site | + | 110315 | 110315 | -2172 | 5491 | AN10746 |
| 1659 | CONTIG100 | 108011 | 108275 | 1.17 | 1.22E-01 | transcription_start_site | + | 110442 | 110442 | -2299 | 5492 | AN10746 |
| 1321 | CONTIG100 | 111391 | 111725 | 1.42 | 3.02E-02 | transcription_start_site | + | 111991 | 111991 | -433  | 5493 | AN10747 |
| 1321 | CONTIG100 | 111391 | 111725 | 1.42 | 3.02E-02 | transcription_start_site | + | 112121 | 112121 | -563  | 5494 | AN10747 |
| 1597 | CONTIG100 | 106821 | 107320 | 1.21 | 1.08E-01 | transcription_start_site | + | 111991 | 111991 | -4920 | 5493 | AN10747 |
| 1597 | CONTIG100 | 106821 | 107320 | 1.21 | 1.08E-01 | transcription_start_site | + | 112121 | 112121 | -5050 | 5494 | AN10747 |
| 1659 | CONTIG100 | 108011 | 108275 | 1.17 | 1.22E-01 | transcription_start_site | + | 111991 | 111991 | -3848 | 5493 | AN10747 |
| 1659 | CONTIG100 | 108011 | 108275 | 1.17 | 1.22E-01 | transcription_start_site | + | 112121 | 112121 | -3978 | 5494 | AN10747 |
| 548  | CONTIG100 | 262291 | 262705 | 2.25 | 2.65E-03 | transcription_start_site | + | 266203 | 266203 | -3705 | 5495 | AN10748 |
| 548  | CONTIG100 | 262291 | 262705 | 2.25 | 2.65E-03 | transcription_start_site | + | 266336 | 266336 | -3838 | 5496 | AN10748 |
| 1368 | CONTIG100 | 274201 | 274477 | 1.38 | 6.74E-02 | transcription_start_site | - | 269257 | 269257 | -5082 | 5497 | AN10749 |
| 192  | CONTIG100 | 179042 | 179606 | 2.84 | 2.26E-04 | transcription_start_site | + | 179809 | 179809 | -485  | 5499 | AN10750 |
| 192  | CONTIG100 | 179042 | 179606 | 2.84 | 2.26E-04 | transcription_start_site | + | 183485 | 183485 | -4161 | 5500 | AN10750 |
| 1719 | CONTIG100 | 180237 | 180591 | 1.13 | 1.38E-01 | transcription_start_site | + | 179809 | 179809 | 605   | 5499 | AN10750 |
| 1719 | CONTIG100 | 180237 | 180591 | 1.13 | 1.38E-01 | transcription_start_site | + | 183485 | 183485 | -3071 | 5500 | AN10750 |
| 37   | CONTIG100 | 218718 | 219209 | 3.3  | 0.00E+00 | transcription_start_site | - | 217841 | 217841 | -1122 | 5501 | AN10751 |
| 37   | CONTIG100 | 218718 | 219209 | 3.3  | 0.00E+00 | transcription_start_site | - | 217504 | 217504 | -1459 | 5502 | AN10751 |
| 510  | CONTIG100 | 250886 | 251231 | 2.3  | 4.57E-03 | transcription_start_site | - | 250921 | 250921 | -137  | 5503 | AN10752 |
| 510  | CONTIG100 | 250886 | 251231 | 2.3  | 4.57E-03 | transcription_start_site | - | 250293 | 250293 | -765  | 5504 | AN10752 |
| 510  | CONTIG100 | 250886 | 251231 | 2.3  | 4.57E-03 | transcription_start_site | - | 250148 | 250148 | -910  | 5505 | AN10752 |
| 510  | CONTIG100 | 250886 | 251231 | 2.3  | 4.57E-03 | transcription_start_site | - | 249661 | 249661 | -1397 | 5506 | AN10752 |
| 1569 | CONTIG101 | 65718  | 66143  | 1.22 | 6.74E-02 | transcription_start_site | + | 70442  | 70442  | -4511 | 5507 | AN10753 |
| 1569 | CONTIG101 | 65718  | 66143  | 1.22 | 6.74E-02 | transcription_start_site | + | 70909  | 70909  | -4978 | 5508 | AN10753 |
| 2041 | CONTIG101 | 181510 | 182009 | 0.92 | 1.76E-01 | transcription_start_site | + | 181851 | 181851 | -91   | 5525 | AN10759 |

|      |           |        |        |      |          |                          |   |        |        |       |      |         |
|------|-----------|--------|--------|------|----------|--------------------------|---|--------|--------|-------|------|---------|
| 1569 | CONTIG101 | 65718  | 66143  | 1.22 | 6.74E-02 | transcription_start_site | + | 67035  | 67035  | -1104 | 5528 | AN10760 |
| 1569 | CONTIG101 | 65718  | 66143  | 1.22 | 6.74E-02 | transcription_start_site | + | 69193  | 69193  | -3262 | 5529 | AN10760 |
| 1569 | CONTIG101 | 65718  | 66143  | 1.22 | 6.74E-02 | transcription_start_site | + | 69524  | 69524  | -3593 | 5530 | AN10760 |
| 402  | CONTIG101 | 166503 | 167092 | 2.44 | 0.00E+00 | transcription_start_site | + | 167370 | 167370 | -572  | 5531 | AN10761 |
| 402  | CONTIG101 | 166503 | 167092 | 2.44 | 0.00E+00 | transcription_start_site | + | 167529 | 167529 | -731  | 5532 | AN10761 |
| 1522 | CONTIG101 | 101946 | 102360 | 1.26 | 6.04E-02 | transcription_start_site | - | 102640 | 102640 | 487   | 5541 | AN10762 |
| 1522 | CONTIG101 | 101946 | 102360 | 1.26 | 6.04E-02 | transcription_start_site | - | 102928 | 102928 | 775   | 5540 | AN10762 |
| 1522 | CONTIG101 | 101946 | 102360 | 1.26 | 6.04E-02 | transcription_start_site | - | 103101 | 103101 | 948   | 5539 | AN10762 |
| 1522 | CONTIG101 | 101946 | 102360 | 1.26 | 6.04E-02 | transcription_start_site | - | 103226 | 103226 | 1073  | 5538 | AN10762 |
| 993  | CONTIG102 | 29181  | 29537  | 1.73 | 2.63E-02 | transcription_start_site | + | 29808  | 29808  | -449  | 5542 | AN10763 |
| 993  | CONTIG102 | 29181  | 29537  | 1.73 | 2.63E-02 | transcription_start_site | + | 30003  | 30003  | -644  | 5543 | AN10763 |
| 993  | CONTIG102 | 29181  | 29537  | 1.73 | 2.63E-02 | transcription_start_site | + | 31460  | 31460  | -2101 | 5544 | AN10763 |
| 993  | CONTIG102 | 29181  | 29537  | 1.73 | 2.63E-02 | transcription_start_site | + | 31938  | 31938  | -2579 | 5545 | AN10764 |
| 993  | CONTIG102 | 29181  | 29537  | 1.73 | 2.63E-02 | transcription_start_site | + | 32244  | 32244  | -2885 | 5546 | AN10764 |
| 966  | CONTIG104 | 107927 | 108276 | 1.75 | 1.54E-02 | transcription_start_site | + | 113223 | 113223 | -5121 | 5575 | AN10772 |
| 723  | CONTIG104 | 213313 | 213663 | 2.02 | 7.08E-03 | transcription_start_site | + | 215161 | 215161 | -1673 | 5576 | AN10773 |
| 2079 | CONTIG104 | 210303 | 211403 | 0.89 | 3.10E-02 | transcription_start_site | + | 215161 | 215161 | -4308 | 5576 | AN10773 |
| 1627 | CONTIG105 | 273079 | 273508 | 1.19 | 1.38E-01 | transcription_start_site | + | 273603 | 273603 | -309  | 5608 | AN10782 |
| 1627 | CONTIG105 | 273079 | 273508 | 1.19 | 1.38E-01 | transcription_start_site | + | 273822 | 273822 | -528  | 5609 | AN10782 |
| 1627 | CONTIG105 | 273079 | 273508 | 1.19 | 1.38E-01 | transcription_start_site | + | 274469 | 274469 | -1175 | 5610 | AN10782 |
| 1627 | CONTIG105 | 273079 | 273508 | 1.19 | 1.38E-01 | transcription_start_site | + | 274645 | 274645 | -1351 | 5611 | AN10782 |
| 1627 | CONTIG105 | 273079 | 273508 | 1.19 | 1.38E-01 | transcription_start_site | + | 275059 | 275059 | -1765 | 5616 | AN10785 |
| 1627 | CONTIG105 | 273079 | 273508 | 1.19 | 1.38E-01 | transcription_start_site | + | 275505 | 275505 | -2211 | 5617 | AN10785 |
| 686  | CONTIG105 | 213995 | 214629 | 2.07 | 1.25E-02 | transcription_start_site | - | 210716 | 210716 | -3596 | 5618 | AN10786 |
| 1708 | CONTIG106 | 10881  | 11320  | 1.13 | 5.49E-02 | transcription_start_site | + | 11407  | 11407  | -306  | 5636 | AN10791 |
| 1708 | CONTIG106 | 10881  | 11320  | 1.13 | 5.49E-02 | transcription_start_site | + | 12959  | 12959  | -1858 | 5637 | AN10791 |
| 2077 | CONTIG106 | 21004  | 21359  | 0.9  | 1.97E-01 | transcription_start_site | + | 22714  | 22714  | -1532 | 5638 | AN10792 |
| 2077 | CONTIG106 | 21004  | 21359  | 0.9  | 1.97E-01 | transcription_start_site | + | 22868  | 22868  | -1686 | 5639 | AN10792 |
| 2077 | CONTIG106 | 21004  | 21359  | 0.9  | 1.97E-01 | transcription_start_site | + | 23505  | 23505  | -2323 | 5640 | AN10792 |
| 2077 | CONTIG106 | 21004  | 21359  | 0.9  | 1.97E-01 | transcription_start_site | + | 24066  | 24066  | -2884 | 5641 | AN10792 |
| 1708 | CONTIG106 | 10881  | 11320  | 1.13 | 5.49E-02 | transcription_start_site | + | 14634  | 14634  | -3533 | 5644 | AN10794 |
| 1708 | CONTIG106 | 10881  | 11320  | 1.13 | 5.49E-02 | transcription_start_site | + | 15412  | 15412  | -4311 | 5645 | AN10794 |
| 2077 | CONTIG106 | 21004  | 21359  | 0.9  | 1.97E-01 | transcription_start_site | + | 25517  | 25517  | -4335 | 5646 | AN10795 |
| 2077 | CONTIG106 | 21004  | 21359  | 0.9  | 1.97E-01 | transcription_start_site | + | 25769  | 25769  | -4587 | 5647 | AN10795 |
| 2057 | CONTIG107 | 148067 | 148636 | 0.91 | 1.54E-01 | transcription_start_site | - | 143236 | 143236 | -5115 | 5653 | AN10797 |
| 741  | CONTIG16  | 122418 | 122775 | 2.01 | 1.37E-02 | transcription_start_site | - | 118395 | 118395 | -4201 | 5658 | AN1080  |
| 741  | CONTIG16  | 122418 | 122775 | 2.01 | 1.37E-02 | transcription_start_site | - | 117844 | 117844 | -4752 | 5659 | AN1080  |
| 1830 | CONTIG107 | 321166 | 321603 | 1.05 | 5.49E-02 | transcription_start_site | - | 317869 | 317869 | -3515 | 5660 | AN10800 |
| 1830 | CONTIG107 | 321166 | 321603 | 1.05 | 5.49E-02 | transcription_start_site | - | 317579 | 317579 | -3805 | 5661 | AN10800 |
| 2002 | CONTIG107 | 319426 | 319775 | 0.94 | 8.54E-02 | transcription_start_site | - | 317869 | 317869 | -1731 | 5660 | AN10800 |
| 2002 | CONTIG107 | 319426 | 319775 | 0.94 | 8.54E-02 | transcription_start_site | - | 317579 | 317579 | -2021 | 5661 | AN10800 |
| 533  | CONTIG107 | 338717 | 339069 | 2.27 | 7.06E-04 | transcription_start_site | + | 340809 | 340809 | -1916 | 5662 | AN10801 |
| 533  | CONTIG107 | 338717 | 339069 | 2.27 | 7.06E-04 | transcription_start_site | + | 340887 | 340887 | -1994 | 5663 | AN10801 |
| 533  | CONTIG107 | 338717 | 339069 | 2.27 | 7.06E-04 | transcription_start_site | + | 341057 | 341057 | -2164 | 5664 | AN10801 |
| 533  | CONTIG107 | 338717 | 339069 | 2.27 | 7.06E-04 | transcription_start_site | + | 341777 | 341777 | -2884 | 5665 | AN10801 |
| 533  | CONTIG107 | 338717 | 339069 | 2.27 | 7.06E-04 | transcription_start_site | + | 342049 | 342049 | -3156 | 5666 | AN10801 |
| 1838 | CONTIG107 | 59343  | 59682  | 1.05 | 9.60E-02 | transcription_start_site | + | 59674  | 59674  | -161  | 5670 | AN10803 |
| 1838 | CONTIG107 | 59343  | 59682  | 1.05 | 9.60E-02 | transcription_start_site | + | 59805  | 59805  | -292  | 5671 | AN10803 |
| 1838 | CONTIG107 | 59343  | 59682  | 1.05 | 9.60E-02 | transcription_start_site | + | 59899  | 59899  | -386  | 5672 | AN10803 |
| 1838 | CONTIG107 | 59343  | 59682  | 1.05 | 9.60E-02 | transcription_start_site | + | 60022  | 60022  | -509  | 5673 | AN10803 |
| 1838 | CONTIG107 | 59343  | 59682  | 1.05 | 9.60E-02 | transcription_start_site | + | 60139  | 60139  | -626  | 5674 | AN10803 |
| 2139 | CONTIG107 | 56345  | 57654  | 0.84 | 3.16E-02 | transcription_start_site | + | 59674  | 59674  | -2674 | 5670 | AN10803 |
| 2139 | CONTIG107 | 56345  | 57654  | 0.84 | 3.16E-02 | transcription_start_site | + | 59805  | 59805  | -2805 | 5671 | AN10803 |
| 2139 | CONTIG107 | 56345  | 57654  | 0.84 | 3.16E-02 | transcription_start_site | + | 59899  | 59899  | -2899 | 5672 | AN10803 |
| 2139 | CONTIG107 | 56345  | 57654  | 0.84 | 3.16E-02 | transcription_start_site | + | 60022  | 60022  | -3022 | 5673 | AN10803 |
| 2139 | CONTIG107 | 56345  | 57654  | 0.84 | 3.16E-02 | transcription_start_site | + | 60139  | 60139  | -3139 | 5674 | AN10803 |
| 1146 | CONTIG107 | 276242 | 277037 | 1.57 | 1.85E-03 | transcription_start_site | + | 278025 | 278025 | -1385 | 5682 | AN10807 |

|      |           |        |        |      |          |                          |   |        |        |       |      |         |
|------|-----------|--------|--------|------|----------|--------------------------|---|--------|--------|-------|------|---------|
| 1146 | CONTIG107 | 276242 | 277037 | 1.57 | 1.85E-03 | transcription_start_site | + | 278643 | 278643 | -2003 | 5683 | AN10807 |
| 1146 | CONTIG107 | 276242 | 277037 | 1.57 | 1.85E-03 | transcription_start_site | + | 278976 | 278976 | -2336 | 5684 | AN10807 |
| 1146 | CONTIG107 | 276242 | 277037 | 1.57 | 1.85E-03 | transcription_start_site | + | 279486 | 279486 | -2846 | 5685 | AN10807 |
| 1146 | CONTIG107 | 276242 | 277037 | 1.57 | 1.85E-03 | transcription_start_site | + | 279863 | 279863 | -3223 | 5686 | AN10807 |
| 2002 | CONTIG107 | 319426 | 319775 | 0.94 | 8.54E-02 | transcription_start_site | - | 315815 | 315815 | -3785 | 5687 | AN10808 |
| 2002 | CONTIG107 | 319426 | 319775 | 0.94 | 8.54E-02 | transcription_start_site | - | 315677 | 315677 | -3923 | 5688 | AN10808 |
| 533  | CONTIG107 | 338717 | 339069 | 2.27 | 7.06E-04 | transcription_start_site | + | 339550 | 339550 | -657  | 5689 | AN10809 |
| 533  | CONTIG107 | 338717 | 339069 | 2.27 | 7.06E-04 | transcription_start_site | + | 340106 | 340106 | -1213 | 5690 | AN10809 |
| 77   | CONTIG107 | 364652 | 365166 | 3.15 | 0.00E+00 | transcription_start_site | + | 369046 | 369046 | -4137 | 5693 | AN10810 |
| 433  | CONTIG108 | 182780 | 183134 | 2.41 | 0.00E+00 | transcription_start_site | + | 184174 | 184174 | -1217 | 5724 | AN10817 |
| 915  | CONTIG108 | 180685 | 180967 | 1.81 | 4.57E-03 | transcription_start_site | + | 184174 | 184174 | -3348 | 5724 | AN10817 |
| 1131 | CONTIG108 | 123766 | 124100 | 1.58 | 1.06E-02 | transcription_start_site | - | 120277 | 120277 | -3656 | 5725 | AN10818 |
| 741  | CONTIG16  | 122418 | 122775 | 2.01 | 1.37E-02 | transcription_start_site | - | 121758 | 121758 | -838  | 5728 | AN1082  |
| 741  | CONTIG16  | 122418 | 122775 | 2.01 | 1.37E-02 | transcription_start_site | - | 120431 | 120431 | -2165 | 5729 | AN1082  |
| 475  | CONTIG109 | 35643  | 36133  | 2.35 | 2.61E-03 | transcription_start_site | + | 40940  | 40940  | -5052 | 5743 | AN10823 |
| 475  | CONTIG109 | 35643  | 36133  | 2.35 | 2.61E-03 | transcription_start_site | + | 41122  | 41122  | -5234 | 5744 | AN10823 |
| 293  | CONTIG109 | 66244  | 66728  | 2.64 | 7.06E-04 | transcription_start_site | + | 69668  | 69668  | -3182 | 5746 | AN10824 |
| 293  | CONTIG109 | 66244  | 66728  | 2.64 | 7.06E-04 | transcription_start_site | + | 69785  | 69785  | -3299 | 5747 | AN10824 |
| 293  | CONTIG109 | 66244  | 66728  | 2.64 | 7.06E-04 | transcription_start_site | + | 70028  | 70028  | -3542 | 5748 | AN10824 |
| 293  | CONTIG109 | 66244  | 66728  | 2.64 | 7.06E-04 | transcription_start_site | + | 70123  | 70123  | -3637 | 5749 | AN10824 |
| 293  | CONTIG109 | 66244  | 66728  | 2.64 | 7.06E-04 | transcription_start_site | + | 70428  | 70428  | -3942 | 5750 | AN10824 |
| 293  | CONTIG109 | 66244  | 66728  | 2.64 | 7.06E-04 | transcription_start_site | + | 70647  | 70647  | -4161 | 5751 | AN10824 |
| 293  | CONTIG109 | 66244  | 66728  | 2.64 | 7.06E-04 | transcription_start_site | + | 70941  | 70941  | -4455 | 5752 | AN10824 |
| 293  | CONTIG109 | 66244  | 66728  | 2.64 | 7.06E-04 | transcription_start_site | + | 71117  | 71117  | -4631 | 5753 | AN10824 |
| 293  | CONTIG109 | 66244  | 66728  | 2.64 | 7.06E-04 | transcription_start_site | + | 71539  | 71539  | -5053 | 5754 | AN10824 |
| 475  | CONTIG109 | 35643  | 36133  | 2.35 | 2.61E-03 | transcription_start_site | + | 37560  | 37560  | -1672 | 5762 | AN10827 |
| 475  | CONTIG109 | 35643  | 36133  | 2.35 | 2.61E-03 | transcription_start_site | + | 37656  | 37656  | -1768 | 5763 | AN10827 |
| 475  | CONTIG109 | 35643  | 36133  | 2.35 | 2.61E-03 | transcription_start_site | + | 39994  | 39994  | -4106 | 5764 | AN10828 |
| 475  | CONTIG109 | 35643  | 36133  | 2.35 | 2.61E-03 | transcription_start_site | + | 40079  | 40079  | -4191 | 5765 | AN10828 |
| 475  | CONTIG109 | 35643  | 36133  | 2.35 | 2.61E-03 | transcription_start_site | + | 40187  | 40187  | -4299 | 5766 | AN10828 |
| 475  | CONTIG109 | 35643  | 36133  | 2.35 | 2.61E-03 | transcription_start_site | + | 40276  | 40276  | -4388 | 5767 | AN10828 |
| 475  | CONTIG109 | 35643  | 36133  | 2.35 | 2.61E-03 | transcription_start_site | + | 40366  | 40366  | -4478 | 5768 | AN10828 |
| 412  | CONTIG109 | 9691   | 10123  | 2.43 | 1.77E-03 | transcription_start_site | - | 7091   | 7091   | -2816 | 5769 | AN10829 |
| 412  | CONTIG109 | 9691   | 10123  | 2.43 | 1.77E-03 | transcription_start_site | - | 6707   | 6707   | -3200 | 5770 | AN10829 |
| 1406 | CONTIG109 | 10446  | 11460  | 1.34 | 7.52E-03 | transcription_start_site | - | 7091   | 7091   | -3862 | 5769 | AN10829 |
| 1406 | CONTIG109 | 10446  | 11460  | 1.34 | 7.52E-03 | transcription_start_site | - | 6707   | 6707   | -4246 | 5770 | AN10829 |
| 741  | CONTIG16  | 122418 | 122775 | 2.01 | 1.37E-02 | transcription_start_site | + | 122624 | 122624 | -27   | 5771 | AN1083  |
| 1025 | CONTIG109 | 157206 | 157566 | 1.7  | 2.29E-02 | transcription_start_site | + | 157392 | 157392 | -6    | 5772 | AN10830 |
| 1025 | CONTIG109 | 157206 | 157566 | 1.7  | 2.29E-02 | transcription_start_site | - | 154044 | 154044 | -3342 | 5773 | AN10831 |
| 887  | CONTIG110 | 76746  | 77095  | 1.84 | 3.78E-03 | transcription_start_site | - | 74033  | 74033  | -2887 | 5781 | AN10834 |
| 887  | CONTIG110 | 76746  | 77095  | 1.84 | 3.78E-03 | transcription_start_site | - | 73641  | 73641  | -3279 | 5782 | AN10834 |
| 887  | CONTIG110 | 76746  | 77095  | 1.84 | 3.78E-03 | transcription_start_site | - | 72663  | 72663  | -4257 | 5783 | AN10834 |
| 1232 | CONTIG110 | 273616 | 273888 | 1.5  | 3.01E-02 | transcription_start_site | - | 270043 | 270043 | -3709 | 5796 | AN10838 |
| 1310 | CONTIG110 | 268651 | 269090 | 1.43 | 3.70E-02 | transcription_start_site | - | 268034 | 268034 | -836  | 5797 | AN10838 |
| 1310 | CONTIG110 | 268651 | 269090 | 1.43 | 3.70E-02 | transcription_start_site | - | 270043 | 270043 | 1172  | 5796 | AN10838 |
| 1310 | CONTIG110 | 268651 | 269090 | 1.43 | 3.70E-02 | transcription_start_site | - | 267645 | 267645 | -1225 | 5798 | AN10838 |
| 1310 | CONTIG110 | 268651 | 269090 | 1.43 | 3.70E-02 | transcription_start_site | - | 267468 | 267468 | -1402 | 5799 | AN10838 |
| 1310 | CONTIG110 | 268651 | 269090 | 1.43 | 3.70E-02 | transcription_start_site | - | 267080 | 267080 | -1790 | 5800 | AN10838 |
| 1310 | CONTIG110 | 268651 | 269090 | 1.43 | 3.70E-02 | transcription_start_site | - | 266201 | 266201 | -2669 | 5801 | AN10838 |
| 741  | CONTIG16  | 122418 | 122775 | 2.01 | 1.37E-02 | transcription_start_site | + | 123764 | 123764 | -1167 | 5804 | AN1084  |
| 741  | CONTIG16  | 122418 | 122775 | 2.01 | 1.37E-02 | transcription_start_site | + | 123985 | 123985 | -1388 | 5805 | AN1084  |
| 741  | CONTIG16  | 122418 | 122775 | 2.01 | 1.37E-02 | transcription_start_site | + | 124070 | 124070 | -1473 | 5806 | AN1084  |
| 741  | CONTIG16  | 122418 | 122775 | 2.01 | 1.37E-02 | transcription_start_site | + | 124398 | 124398 | -1801 | 5807 | AN1084  |
| 741  | CONTIG16  | 122418 | 122775 | 2.01 | 1.37E-02 | transcription_start_site | + | 125141 | 125141 | -2544 | 5808 | AN1084  |
| 887  | CONTIG110 | 76746  | 77095  | 1.84 | 3.78E-03 | transcription_start_site | - | 71894  | 71894  | -5026 | 5810 | AN10841 |
| 1310 | CONTIG110 | 268651 | 269090 | 1.43 | 3.70E-02 | transcription_start_site | - | 265399 | 265399 | -3471 | 5817 | AN10843 |
| 1310 | CONTIG110 | 268651 | 269090 | 1.43 | 3.70E-02 | transcription_start_site | - | 265151 | 265151 | -3719 | 5818 | AN10843 |

|      |           |        |        |      |          |                          |   |        |        |       |      |         |
|------|-----------|--------|--------|------|----------|--------------------------|---|--------|--------|-------|------|---------|
| 1411 | CONTIG112 | 114466 | 114960 | 1.34 | 2.63E-02 | transcription_start_site | - | 114256 | 114256 | -457  | 5819 | AN10844 |
| 1411 | CONTIG112 | 114466 | 114960 | 1.34 | 2.63E-02 | transcription_start_site | - | 114057 | 114057 | -656  | 5820 | AN10844 |
| 1411 | CONTIG112 | 114466 | 114960 | 1.34 | 2.63E-02 | transcription_start_site | - | 113936 | 113936 | -777  | 5821 | AN10844 |
| 1411 | CONTIG112 | 114466 | 114960 | 1.34 | 2.63E-02 | transcription_start_site | - | 113300 | 113300 | -1413 | 5822 | AN10844 |
| 896  | CONTIG112 | 351166 | 351580 | 1.83 | 4.01E-03 | transcription_start_site | - | 350869 | 350869 | -504  | 5829 | AN10846 |
| 896  | CONTIG112 | 351166 | 351580 | 1.83 | 4.01E-03 | transcription_start_site | - | 349478 | 349478 | -1895 | 5830 | AN10846 |
| 896  | CONTIG112 | 351166 | 351580 | 1.83 | 4.01E-03 | transcription_start_site | - | 348602 | 348602 | -2771 | 5831 | AN10846 |
| 896  | CONTIG112 | 351166 | 351580 | 1.83 | 4.01E-03 | transcription_start_site | - | 347498 | 347498 | -3875 | 5832 | AN10846 |
| 896  | CONTIG112 | 351166 | 351580 | 1.83 | 4.01E-03 | transcription_start_site | - | 346660 | 346660 | -4713 | 5833 | AN10846 |
| 1099 | CONTIG112 | 93239  | 93510  | 1.61 | 9.96E-03 | transcription_start_site | + | 93493  | 93493  | -118  | 5834 | AN10847 |
| 1099 | CONTIG112 | 93239  | 93510  | 1.61 | 9.96E-03 | transcription_start_site | + | 93676  | 93676  | -301  | 5835 | AN10847 |
| 1099 | CONTIG112 | 93239  | 93510  | 1.61 | 9.96E-03 | transcription_start_site | + | 93785  | 93785  | -410  | 5836 | AN10847 |
| 1099 | CONTIG112 | 93239  | 93510  | 1.61 | 9.96E-03 | transcription_start_site | + | 94145  | 94145  | -770  | 5837 | AN10847 |
| 2136 | CONTIG112 | 91804  | 92084  | 0.85 | 1.54E-01 | transcription_start_site | + | 93493  | 93493  | -1549 | 5834 | AN10847 |
| 2136 | CONTIG112 | 91804  | 92084  | 0.85 | 1.54E-01 | transcription_start_site | + | 93676  | 93676  | -1732 | 5835 | AN10847 |
| 2136 | CONTIG112 | 91804  | 92084  | 0.85 | 1.54E-01 | transcription_start_site | + | 93785  | 93785  | -1841 | 5836 | AN10847 |
| 2136 | CONTIG112 | 91804  | 92084  | 0.85 | 1.54E-01 | transcription_start_site | + | 94145  | 94145  | -2201 | 5837 | AN10847 |
| 1411 | CONTIG112 | 114466 | 114960 | 1.34 | 2.63E-02 | transcription_start_site | - | 111957 | 111957 | -2756 | 5844 | AN10849 |
| 741  | CONTIG16  | 122418 | 122775 | 2.01 | 1.37E-02 | transcription_start_site | + | 126155 | 126155 | -3558 | 5848 | AN1085  |
| 741  | CONTIG16  | 122418 | 122775 | 2.01 | 1.37E-02 | transcription_start_site | + | 126368 | 126368 | -3771 | 5849 | AN1085  |
| 741  | CONTIG16  | 122418 | 122775 | 2.01 | 1.37E-02 | transcription_start_site | + | 126862 | 126862 | -4265 | 5850 | AN1085  |
| 329  | CONTIG112 | 140190 | 140555 | 2.56 | 0.00E+00 | transcription_start_site | + | 143928 | 143928 | -3555 | 5853 | AN10851 |
| 1631 | CONTIG112 | 142877 | 143466 | 1.18 | 2.30E-02 | transcription_start_site | + | 143928 | 143928 | -756  | 5853 | AN10851 |
| 2207 | CONTIG112 | 138840 | 139409 | 0.79 | 1.97E-01 | transcription_start_site | + | 143928 | 143928 | -4803 | 5853 | AN10851 |
| 2354 | CONTIG112 | 32644  | 33668  | 0.52 | 1.51E-01 | transcription_start_site | - | 28194  | 28194  | -4962 | 5854 | AN10852 |
| 1152 | CONTIG113 | 161038 | 161389 | 1.57 | 2.30E-02 | transcription_start_site | - | 158541 | 158541 | -2672 | 5857 | AN10854 |
| 1152 | CONTIG113 | 161038 | 161389 | 1.57 | 2.30E-02 | transcription_start_site | - | 157935 | 157935 | -3278 | 5858 | AN10854 |
| 1152 | CONTIG113 | 161038 | 161389 | 1.57 | 2.30E-02 | transcription_start_site | - | 157740 | 157740 | -3473 | 5859 | AN10854 |
| 1152 | CONTIG113 | 161038 | 161389 | 1.57 | 2.30E-02 | transcription_start_site | - | 157534 | 157534 | -3679 | 5860 | AN10854 |
| 1152 | CONTIG113 | 161038 | 161389 | 1.57 | 2.30E-02 | transcription_start_site | - | 157126 | 157126 | -4087 | 5861 | AN10854 |
| 1152 | CONTIG113 | 161038 | 161389 | 1.57 | 2.30E-02 | transcription_start_site | - | 156965 | 156965 | -4248 | 5862 | AN10854 |
| 1398 | CONTIG113 | 173930 | 174666 | 1.35 | 4.73E-02 | transcription_start_site | - | 169414 | 169414 | -4884 | 5863 | AN10855 |
| 1398 | CONTIG113 | 173930 | 174666 | 1.35 | 4.73E-02 | transcription_start_site | - | 168972 | 168972 | -5326 | 5864 | AN10855 |
| 1398 | CONTIG113 | 173930 | 174666 | 1.35 | 4.73E-02 | transcription_start_site | - | 170593 | 170593 | -3705 | 5871 | AN10857 |
| 26   | CONTIG113 | 73652  | 74011  | 3.4  | 0.00E+00 | transcription_start_site | - | 69089  | 69089  | -4742 | 5874 | AN10859 |
| 185  | CONTIG113 | 74042  | 74916  | 2.87 | 0.00E+00 | transcription_start_site | - | 69089  | 69089  | -5390 | 5874 | AN10859 |
| 1152 | CONTIG113 | 161038 | 161389 | 1.57 | 2.30E-02 | transcription_start_site | - | 160180 | 160180 | -1033 | 5875 | AN10860 |
| 1152 | CONTIG113 | 161038 | 161389 | 1.57 | 2.30E-02 | transcription_start_site | - | 159835 | 159835 | -1378 | 5876 | AN10860 |
| 2246 | CONTIG115 | 68939  | 69513  | 0.75 | 1.76E-01 | transcription_start_site | + | 69306  | 69306  | -80   | 5881 | AN10862 |
| 2246 | CONTIG115 | 68939  | 69513  | 0.75 | 1.76E-01 | transcription_start_site | + | 70118  | 70118  | -892  | 5882 | AN10862 |
| 2246 | CONTIG115 | 68939  | 69513  | 0.75 | 1.76E-01 | transcription_start_site | + | 70400  | 70400  | -1174 | 5883 | AN10862 |
| 2246 | CONTIG115 | 68939  | 69513  | 0.75 | 1.76E-01 | transcription_start_site | + | 70703  | 70703  | -1477 | 5884 | AN10862 |
| 2246 | CONTIG115 | 68939  | 69513  | 0.75 | 1.76E-01 | transcription_start_site | + | 74115  | 74115  | -4889 | 5885 | AN10863 |
| 2246 | CONTIG115 | 68939  | 69513  | 0.75 | 1.76E-01 | transcription_start_site | + | 74196  | 74196  | -4970 | 5886 | AN10863 |
| 2246 | CONTIG115 | 68939  | 69513  | 0.75 | 1.76E-01 | transcription_start_site | + | 71548  | 71548  | -2322 | 5888 | AN10864 |
| 2246 | CONTIG115 | 68939  | 69513  | 0.75 | 1.76E-01 | transcription_start_site | + | 72148  | 72148  | -2922 | 5889 | AN10864 |
| 2246 | CONTIG115 | 68939  | 69513  | 0.75 | 1.76E-01 | transcription_start_site | + | 72798  | 72798  | -3572 | 5890 | AN10865 |
| 2246 | CONTIG115 | 68939  | 69513  | 0.75 | 1.76E-01 | transcription_start_site | + | 72889  | 72889  | -3663 | 5891 | AN10865 |
| 2246 | CONTIG115 | 68939  | 69513  | 0.75 | 1.76E-01 | transcription_start_site | + | 73164  | 73164  | -3938 | 5892 | AN10865 |
| 2246 | CONTIG115 | 68939  | 69513  | 0.75 | 1.76E-01 | transcription_start_site | + | 73385  | 73385  | -4159 | 5893 | AN10865 |
| 372  | CONTIG16  | 139656 | 140300 | 2.49 | 1.09E-03 | transcription_start_site | - | 134762 | 134762 | -5216 | 5906 | AN1087  |
| 1447 | CONTIG16  | 134631 | 134905 | 1.31 | 9.60E-02 | transcription_start_site | - | 134762 | 134762 | -6    | 5906 | AN1087  |
| 1447 | CONTIG16  | 134631 | 134905 | 1.31 | 9.60E-02 | transcription_start_site | - | 133325 | 133325 | -1443 | 5907 | AN1087  |
| 789  | CONTIG117 | 39976  | 40481  | 1.96 | 9.96E-03 | transcription_start_site | + | 39151  | 39151  | 1077  | 5918 | AN10871 |
| 996  | CONTIG117 | 59269  | 59678  | 1.72 | 1.81E-03 | transcription_start_site | - | 58697  | 58697  | -776  | 5919 | AN10872 |
| 996  | CONTIG117 | 59269  | 59678  | 1.72 | 1.81E-03 | transcription_start_site | - | 57053  | 57053  | -2420 | 5920 | AN10872 |
| 996  | CONTIG117 | 59269  | 59678  | 1.72 | 1.81E-03 | transcription_start_site | - | 56908  | 56908  | -2565 | 5921 | AN10872 |



|      |           |        |        |      |          |                          |   |        |        |       |      |         |
|------|-----------|--------|--------|------|----------|--------------------------|---|--------|--------|-------|------|---------|
| 1911 | CONTIG117 | 74928  | 75220  | 1    | 1.76E-01 | transcription_start_site | - | 69951  | 69951  | -5123 | 5929 | AN10875 |
| 996  | CONTIG117 | 59269  | 59678  | 1.72 | 1.81E-03 | transcription_start_site | - | 56415  | 56415  | -3058 | 5943 | AN10877 |
| 996  | CONTIG117 | 59269  | 59678  | 1.72 | 1.81E-03 | transcription_start_site | - | 56250  | 56250  | -3223 | 5944 | AN10877 |
| 1447 | CONTIG16  | 134631 | 134905 | 1.31 | 9.60E-02 | transcription_start_site | + | 135191 | 135191 | -423  | 5950 | AN10888 |
| 1447 | CONTIG16  | 134631 | 134905 | 1.31 | 9.60E-02 | transcription_start_site | + | 135403 | 135403 | -635  | 5951 | AN10888 |
| 1447 | CONTIG16  | 134631 | 134905 | 1.31 | 9.60E-02 | transcription_start_site | + | 135655 | 135655 | -887  | 5952 | AN10888 |
| 789  | CONTIG117 | 39976  | 40481  | 1.96 | 9.96E-03 | transcription_start_site | + | 39648  | 39648  | 580   | 5956 | AN10881 |
| 789  | CONTIG117 | 39976  | 40481  | 1.96 | 9.96E-03 | transcription_start_site | + | 39514  | 39514  | 714   | 5955 | AN10881 |
| 789  | CONTIG117 | 39976  | 40481  | 1.96 | 9.96E-03 | transcription_start_site | + | 39235  | 39235  | 993   | 5954 | AN10881 |
| 1911 | CONTIG117 | 74928  | 75220  | 1    | 1.76E-01 | transcription_start_site | - | 72373  | 72373  | -2701 | 5957 | AN10882 |
| 1911 | CONTIG117 | 74928  | 75220  | 1    | 1.76E-01 | transcription_start_site | - | 72011  | 72011  | -3063 | 5958 | AN10882 |
| 1911 | CONTIG117 | 74928  | 75220  | 1    | 1.76E-01 | transcription_start_site | - | 71827  | 71827  | -3247 | 5959 | AN10882 |
| 1911 | CONTIG117 | 74928  | 75220  | 1    | 1.76E-01 | transcription_start_site | - | 71666  | 71666  | -3408 | 5960 | AN10882 |
| 1911 | CONTIG117 | 74928  | 75220  | 1    | 1.76E-01 | transcription_start_site | - | 71487  | 71487  | -3587 | 5961 | AN10882 |
| 931  | CONTIG118 | 61431  | 62079  | 1.79 | 0.00E+00 | transcription_start_site | + | 63563  | 63563  | -1808 | 5970 | AN10885 |
| 931  | CONTIG118 | 61431  | 62079  | 1.79 | 0.00E+00 | transcription_start_site | + | 65157  | 65157  | -3402 | 5971 | AN10885 |
| 2132 | CONTIG118 | 62792  | 63286  | 0.85 | 3.61E-02 | transcription_start_site | + | 63563  | 63563  | -524  | 5970 | AN10885 |
| 2132 | CONTIG118 | 62792  | 63286  | 0.85 | 3.61E-02 | transcription_start_site | + | 65157  | 65157  | -2118 | 5971 | AN10885 |
| 2164 | CONTIG118 | 60766  | 61120  | 0.82 | 7.66E-02 | transcription_start_site | + | 63563  | 63563  | -2620 | 5970 | AN10885 |
| 2164 | CONTIG118 | 60766  | 61120  | 0.82 | 7.66E-02 | transcription_start_site | + | 65157  | 65157  | -4214 | 5971 | AN10885 |
| 932  | CONTIG118 | 67144  | 67579  | 1.79 | 2.69E-04 | transcription_start_site | + | 71056  | 71056  | -3694 | 5972 | AN10886 |
| 932  | CONTIG118 | 67144  | 67579  | 1.79 | 2.69E-04 | transcription_start_site | + | 71286  | 71286  | -3924 | 5973 | AN10886 |
| 932  | CONTIG118 | 67144  | 67579  | 1.79 | 2.69E-04 | transcription_start_site | + | 71378  | 71378  | -4016 | 5974 | AN10886 |
| 932  | CONTIG118 | 67144  | 67579  | 1.79 | 2.69E-04 | transcription_start_site | + | 71521  | 71521  | -4159 | 5975 | AN10886 |
| 932  | CONTIG118 | 67144  | 67579  | 1.79 | 2.69E-04 | transcription_start_site | + | 71991  | 71991  | -4629 | 5976 | AN10886 |
| 372  | CONTIG16  | 139656 | 140300 | 2.49 | 1.09E-03 | transcription_start_site | - | 138614 | 138614 | -1364 | 5987 | AN10889 |
| 372  | CONTIG16  | 139656 | 140300 | 2.49 | 1.09E-03 | transcription_start_site | - | 137831 | 137831 | -2147 | 5988 | AN10889 |
| 372  | CONTIG16  | 139656 | 140300 | 2.49 | 1.09E-03 | transcription_start_site | - | 136718 | 136718 | -3260 | 5989 | AN10889 |
| 931  | CONTIG118 | 61431  | 62079  | 1.79 | 0.00E+00 | transcription_start_site | + | 63021  | 63021  | -1266 | 5990 | AN10890 |
| 931  | CONTIG118 | 61431  | 62079  | 1.79 | 0.00E+00 | transcription_start_site | + | 63201  | 63201  | -1446 | 5991 | AN10890 |
| 2132 | CONTIG118 | 62792  | 63286  | 0.85 | 3.61E-02 | transcription_start_site | + | 63021  | 63021  | 18    | 5990 | AN10890 |
| 2132 | CONTIG118 | 62792  | 63286  | 0.85 | 3.61E-02 | transcription_start_site | + | 63201  | 63201  | -162  | 5991 | AN10890 |
| 2164 | CONTIG118 | 60766  | 61120  | 0.82 | 7.66E-02 | transcription_start_site | + | 63021  | 63021  | -2078 | 5990 | AN10890 |
| 2164 | CONTIG118 | 60766  | 61120  | 0.82 | 7.66E-02 | transcription_start_site | + | 63201  | 63201  | -2258 | 5991 | AN10890 |
| 688  | CONTIG119 | 20027  | 20391  | 2.06 | 8.35E-04 | transcription_start_site | + | 25077  | 25077  | -4868 | 5992 | AN10891 |
| 688  | CONTIG119 | 20027  | 20391  | 2.06 | 8.35E-04 | transcription_start_site | + | 25257  | 25257  | -5048 | 5993 | AN10891 |
| 975  | CONTIG119 | 36378  | 36877  | 1.74 | 4.57E-03 | transcription_start_site | + | 38173  | 38173  | -1545 | 5996 | AN10892 |
| 975  | CONTIG119 | 36378  | 36877  | 1.74 | 4.57E-03 | transcription_start_site | + | 38466  | 38466  | -1838 | 5997 | AN10892 |
| 975  | CONTIG119 | 36378  | 36877  | 1.74 | 4.57E-03 | transcription_start_site | + | 39167  | 39167  | -2539 | 5998 | AN10892 |
| 1456 | CONTIG119 | 35553  | 35915  | 1.3  | 2.63E-02 | transcription_start_site | + | 38173  | 38173  | -2439 | 5996 | AN10892 |
| 1456 | CONTIG119 | 35553  | 35915  | 1.3  | 2.63E-02 | transcription_start_site | + | 38466  | 38466  | -2732 | 5997 | AN10892 |
| 1456 | CONTIG119 | 35553  | 35915  | 1.3  | 2.63E-02 | transcription_start_site | + | 39167  | 39167  | -3433 | 5998 | AN10892 |
| 2275 | CONTIG119 | 37208  | 38092  | 0.7  | 9.43E-02 | transcription_start_site | + | 38173  | 38173  | -523  | 5996 | AN10892 |
| 2275 | CONTIG119 | 37208  | 38092  | 0.7  | 9.43E-02 | transcription_start_site | + | 38466  | 38466  | -816  | 5997 | AN10892 |
| 2275 | CONTIG119 | 37208  | 38092  | 0.7  | 9.43E-02 | transcription_start_site | + | 39167  | 39167  | -1517 | 5998 | AN10892 |
| 975  | CONTIG119 | 36378  | 36877  | 1.74 | 4.57E-03 | transcription_start_site | + | 37034  | 37034  | -406  | 6013 | AN10896 |
| 975  | CONTIG119 | 36378  | 36877  | 1.74 | 4.57E-03 | transcription_start_site | + | 37239  | 37239  | -611  | 6014 | AN10896 |
| 1456 | CONTIG119 | 35553  | 35915  | 1.3  | 2.63E-02 | transcription_start_site | + | 37034  | 37034  | -1300 | 6013 | AN10896 |
| 1456 | CONTIG119 | 35553  | 35915  | 1.3  | 2.63E-02 | transcription_start_site | + | 37239  | 37239  | -1505 | 6014 | AN10896 |
| 2275 | CONTIG119 | 37208  | 38092  | 0.7  | 9.43E-02 | transcription_start_site | + | 37239  | 37239  | 411   | 6014 | AN10896 |
| 2275 | CONTIG119 | 37208  | 38092  | 0.7  | 9.43E-02 | transcription_start_site | + | 37034  | 37034  | 616   | 6013 | AN10896 |
| 688  | CONTIG119 | 20027  | 20391  | 2.06 | 8.35E-04 | transcription_start_site | + | 22427  | 22427  | -2218 | 6015 | AN10897 |
| 688  | CONTIG119 | 20027  | 20391  | 2.06 | 8.35E-04 | transcription_start_site | + | 22827  | 22827  | -2618 | 6016 | AN10897 |
| 688  | CONTIG119 | 20027  | 20391  | 2.06 | 8.35E-04 | transcription_start_site | + | 23210  | 23210  | -3001 | 6017 | AN10897 |
| 688  | CONTIG119 | 20027  | 20391  | 2.06 | 8.35E-04 | transcription_start_site | + | 24452  | 24452  | -4243 | 6018 | AN10897 |
| 688  | CONTIG119 | 20027  | 20391  | 2.06 | 8.35E-04 | transcription_start_site | + | 24641  | 24641  | -4432 | 6019 | AN10897 |
| 688  | CONTIG119 | 20027  | 20391  | 2.06 | 8.35E-04 | transcription_start_site | + | 19901  | 19901  | 308   | 6020 | AN10898 |

|      |           |        |        |      |          |                          |   |        |        |       |      |         |
|------|-----------|--------|--------|------|----------|--------------------------|---|--------|--------|-------|------|---------|
| 688  | CONTIG119 | 20027  | 20391  | 2.06 | 8.35E-04 | transcription_start_site | + | 20672  | 20672  | -463  | 6021 | AN10898 |
| 688  | CONTIG119 | 20027  | 20391  | 2.06 | 8.35E-04 | transcription_start_site | + | 20982  | 20982  | -773  | 6022 | AN10898 |
| 688  | CONTIG119 | 20027  | 20391  | 2.06 | 8.35E-04 | transcription_start_site | + | 21324  | 21324  | -1115 | 6023 | AN10898 |
| 688  | CONTIG119 | 20027  | 20391  | 2.06 | 8.35E-04 | transcription_start_site | + | 21661  | 21661  | -1452 | 6024 | AN10898 |
| 688  | CONTIG119 | 20027  | 20391  | 2.06 | 8.35E-04 | transcription_start_site | + | 21773  | 21773  | -1564 | 6025 | AN10898 |
| 1644 | CONTIG16  | 144616 | 144971 | 1.18 | 1.38E-01 | transcription_start_site | - | 142019 | 142019 | -2774 | 6028 | AN1090  |
| 1644 | CONTIG16  | 144616 | 144971 | 1.18 | 1.38E-01 | transcription_start_site | - | 141873 | 141873 | -2920 | 6029 | AN1090  |
| 1644 | CONTIG16  | 144616 | 144971 | 1.18 | 1.38E-01 | transcription_start_site | - | 141692 | 141692 | -3101 | 6030 | AN1090  |
| 374  | CONTIG122 | 6155   | 6519   | 2.49 | 1.20E-03 | transcription_start_site | - | 6468   | 6468   | 131   | 6032 | AN10900 |
| 48   | CONTIG122 | 101346 | 101600 | 3.24 | 0.00E+00 | transcription_start_site | - | 101980 | 101980 | 507   | 6037 | AN10902 |
| 48   | CONTIG122 | 101346 | 101600 | 3.24 | 0.00E+00 | transcription_start_site | - | 102336 | 102336 | 863   | 6036 | AN10902 |
| 76   | CONTIG122 | 102766 | 103270 | 3.16 | 0.00E+00 | transcription_start_site | - | 102735 | 102735 | -283  | 6035 | AN10902 |
| 76   | CONTIG122 | 102766 | 103270 | 3.16 | 0.00E+00 | transcription_start_site | - | 102336 | 102336 | -682  | 6036 | AN10902 |
| 76   | CONTIG122 | 102766 | 103270 | 3.16 | 0.00E+00 | transcription_start_site | - | 101980 | 101980 | -1038 | 6037 | AN10902 |
| 441  | CONTIG122 | 105986 | 107380 | 2.4  | 3.37E-03 | transcription_start_site | - | 102735 | 102735 | -3948 | 6035 | AN10902 |
| 441  | CONTIG122 | 105986 | 107380 | 2.4  | 3.37E-03 | transcription_start_site | - | 102336 | 102336 | -4347 | 6036 | AN10902 |
| 441  | CONTIG122 | 105986 | 107380 | 2.4  | 3.37E-03 | transcription_start_site | - | 101980 | 101980 | -4703 | 6037 | AN10902 |
| 650  | CONTIG122 | 104931 | 105302 | 2.11 | 9.32E-03 | transcription_start_site | - | 102735 | 102735 | -2381 | 6035 | AN10902 |
| 650  | CONTIG122 | 104931 | 105302 | 2.11 | 9.32E-03 | transcription_start_site | - | 102336 | 102336 | -2780 | 6036 | AN10902 |
| 650  | CONTIG122 | 104931 | 105302 | 2.11 | 9.32E-03 | transcription_start_site | - | 101980 | 101980 | -3136 | 6037 | AN10902 |
| 764  | CONTIG122 | 102081 | 102650 | 1.98 | 1.25E-02 | transcription_start_site | - | 102336 | 102336 | -29   | 6036 | AN10902 |
| 764  | CONTIG122 | 102081 | 102650 | 1.98 | 1.25E-02 | transcription_start_site | - | 102735 | 102735 | 369   | 6035 | AN10902 |
| 764  | CONTIG122 | 102081 | 102650 | 1.98 | 1.25E-02 | transcription_start_site | - | 101980 | 101980 | -385  | 6037 | AN10902 |
| 374  | CONTIG122 | 6155   | 6519   | 2.49 | 1.20E-03 | transcription_start_site | - | 5899   | 5899   | -438  | 6040 | AN10904 |
| 374  | CONTIG122 | 6155   | 6519   | 2.49 | 1.20E-03 | transcription_start_site | - | 5697   | 5697   | -640  | 6041 | AN10904 |
| 374  | CONTIG122 | 6155   | 6519   | 2.49 | 1.20E-03 | transcription_start_site | - | 5574   | 5574   | -763  | 6042 | AN10904 |
| 374  | CONTIG122 | 6155   | 6519   | 2.49 | 1.20E-03 | transcription_start_site | - | 5279   | 5279   | -1058 | 6043 | AN10904 |
| 374  | CONTIG122 | 6155   | 6519   | 2.49 | 1.20E-03 | transcription_start_site | - | 4481   | 4481   | -1856 | 6044 | AN10904 |
| 374  | CONTIG122 | 6155   | 6519   | 2.49 | 1.20E-03 | transcription_start_site | - | 4322   | 4322   | -2015 | 6045 | AN10904 |
| 374  | CONTIG122 | 6155   | 6519   | 2.49 | 1.20E-03 | transcription_start_site | - | 4081   | 4081   | -2256 | 6046 | AN10904 |
| 374  | CONTIG122 | 6155   | 6519   | 2.49 | 1.20E-03 | transcription_start_site | - | 3714   | 3714   | -2623 | 6047 | AN10904 |
| 374  | CONTIG122 | 6155   | 6519   | 2.49 | 1.20E-03 | transcription_start_site | - | 3588   | 3588   | -2749 | 6048 | AN10904 |
| 374  | CONTIG122 | 6155   | 6519   | 2.49 | 1.20E-03 | transcription_start_site | - | 3489   | 3489   | -2848 | 6049 | AN10904 |
| 374  | CONTIG122 | 6155   | 6519   | 2.49 | 1.20E-03 | transcription_start_site | - | 3331   | 3331   | -3006 | 6050 | AN10904 |
| 374  | CONTIG122 | 6155   | 6519   | 2.49 | 1.20E-03 | transcription_start_site | - | 3161   | 3161   | -3176 | 6051 | AN10904 |
| 374  | CONTIG122 | 6155   | 6519   | 2.49 | 1.20E-03 | transcription_start_site | - | 2931   | 2931   | -3406 | 6052 | AN10904 |
| 374  | CONTIG122 | 6155   | 6519   | 2.49 | 1.20E-03 | transcription_start_site | - | 2433   | 2433   | -3904 | 6053 | AN10904 |
| 48   | CONTIG122 | 101346 | 101600 | 3.24 | 0.00E+00 | transcription_start_site | - | 101075 | 101075 | -398  | 6054 | AN10905 |
| 48   | CONTIG122 | 101346 | 101600 | 3.24 | 0.00E+00 | transcription_start_site | - | 100775 | 100775 | -698  | 6055 | AN10905 |
| 48   | CONTIG122 | 101346 | 101600 | 3.24 | 0.00E+00 | transcription_start_site | - | 100491 | 100491 | -982  | 6056 | AN10905 |
| 48   | CONTIG122 | 101346 | 101600 | 3.24 | 0.00E+00 | transcription_start_site | - | 99902  | 99902  | -1571 | 6057 | AN10905 |
| 48   | CONTIG122 | 101346 | 101600 | 3.24 | 0.00E+00 | transcription_start_site | - | 99746  | 99746  | -1727 | 6058 | AN10905 |
| 48   | CONTIG122 | 101346 | 101600 | 3.24 | 0.00E+00 | transcription_start_site | - | 99279  | 99279  | -2194 | 6059 | AN10905 |
| 76   | CONTIG122 | 102766 | 103270 | 3.16 | 0.00E+00 | transcription_start_site | - | 101075 | 101075 | -1943 | 6054 | AN10905 |
| 76   | CONTIG122 | 102766 | 103270 | 3.16 | 0.00E+00 | transcription_start_site | - | 100775 | 100775 | -2243 | 6055 | AN10905 |
| 76   | CONTIG122 | 102766 | 103270 | 3.16 | 0.00E+00 | transcription_start_site | - | 100491 | 100491 | -2527 | 6056 | AN10905 |
| 76   | CONTIG122 | 102766 | 103270 | 3.16 | 0.00E+00 | transcription_start_site | - | 99902  | 99902  | -3116 | 6057 | AN10905 |
| 76   | CONTIG122 | 102766 | 103270 | 3.16 | 0.00E+00 | transcription_start_site | - | 99746  | 99746  | -3272 | 6058 | AN10905 |
| 76   | CONTIG122 | 102766 | 103270 | 3.16 | 0.00E+00 | transcription_start_site | - | 99279  | 99279  | -3739 | 6059 | AN10905 |
| 441  | CONTIG122 | 105986 | 107380 | 2.4  | 3.37E-03 | transcription_start_site | - | 101075 | 101075 | -5608 | 6054 | AN10905 |
| 650  | CONTIG122 | 104931 | 105302 | 2.11 | 9.32E-03 | transcription_start_site | - | 101075 | 101075 | -4041 | 6054 | AN10905 |
| 650  | CONTIG122 | 104931 | 105302 | 2.11 | 9.32E-03 | transcription_start_site | - | 100775 | 100775 | -4341 | 6055 | AN10905 |
| 650  | CONTIG122 | 104931 | 105302 | 2.11 | 9.32E-03 | transcription_start_site | - | 100491 | 100491 | -4625 | 6056 | AN10905 |
| 764  | CONTIG122 | 102081 | 102650 | 1.98 | 1.25E-02 | transcription_start_site | - | 101075 | 101075 | -1290 | 6054 | AN10905 |
| 764  | CONTIG122 | 102081 | 102650 | 1.98 | 1.25E-02 | transcription_start_site | - | 100775 | 100775 | -1590 | 6055 | AN10905 |
| 764  | CONTIG122 | 102081 | 102650 | 1.98 | 1.25E-02 | transcription_start_site | - | 100491 | 100491 | -1874 | 6056 | AN10905 |
| 764  | CONTIG122 | 102081 | 102650 | 1.98 | 1.25E-02 | transcription_start_site | - | 99902  | 99902  | -2463 | 6057 | AN10905 |

|      |           |        |        |      |          |                          |   |        |        |       |      |         |
|------|-----------|--------|--------|------|----------|--------------------------|---|--------|--------|-------|------|---------|
| 764  | CONTIG122 | 102081 | 102650 | 1.98 | 1.25E-02 | transcription_start_site | - | 99746  | 99746  | -2619 | 6058 | AN10905 |
| 764  | CONTIG122 | 102081 | 102650 | 1.98 | 1.25E-02 | transcription_start_site | - | 99279  | 99279  | -3086 | 6059 | AN10905 |
| 1063 | CONTIG123 | 7808   | 8154   | 1.66 | 2.05E-02 | transcription_start_site | - | 7646   | 7646   | -335  | 6060 | AN10906 |
| 1063 | CONTIG123 | 7808   | 8154   | 1.66 | 2.05E-02 | transcription_start_site | - | 6985   | 6985   | -996  | 6061 | AN10906 |
| 1063 | CONTIG123 | 7808   | 8154   | 1.66 | 2.05E-02 | transcription_start_site | - | 6748   | 6748   | -1233 | 6062 | AN10906 |
| 1063 | CONTIG123 | 7808   | 8154   | 1.66 | 2.05E-02 | transcription_start_site | - | 6181   | 6181   | -1800 | 6063 | AN10906 |
| 1606 | CONTIG123 | 21244  | 22559  | 1.2  | 8.63E-02 | transcription_start_site | - | 23270  | 23270  | 1368  | 6074 | AN10908 |
| 1606 | CONTIG123 | 21244  | 22559  | 1.2  | 8.63E-02 | transcription_start_site | - | 23426  | 23426  | 1524  | 6073 | AN10908 |
| 273  | CONTIG123 | 58357  | 58631  | 2.67 | 2.51E-04 | transcription_start_site | + | 58353  | 58353  | 141   | 6076 | AN10909 |
| 273  | CONTIG123 | 58357  | 58631  | 2.67 | 2.51E-04 | transcription_start_site | + | 57501  | 57501  | 993   | 6075 | AN10909 |
| 1541 | CONTIG123 | 68637  | 68981  | 1.24 | 4.21E-02 | transcription_start_site | - | 65591  | 65591  | -3218 | 6077 | AN10910 |
| 1541 | CONTIG123 | 68637  | 68981  | 1.24 | 4.21E-02 | transcription_start_site | - | 65336  | 65336  | -3473 | 6078 | AN10910 |
| 1541 | CONTIG123 | 68637  | 68981  | 1.24 | 4.21E-02 | transcription_start_site | - | 65233  | 65233  | -3576 | 6079 | AN10910 |
| 1541 | CONTIG123 | 68637  | 68981  | 1.24 | 4.21E-02 | transcription_start_site | - | 65049  | 65049  | -3760 | 6080 | AN10910 |
| 1541 | CONTIG123 | 68637  | 68981  | 1.24 | 4.21E-02 | transcription_start_site | - | 64422  | 64422  | -4387 | 6081 | AN10910 |
| 1541 | CONTIG123 | 68637  | 68981  | 1.24 | 4.21E-02 | transcription_start_site | - | 63944  | 63944  | -4865 | 6082 | AN10910 |
| 1541 | CONTIG123 | 68637  | 68981  | 1.24 | 4.21E-02 | transcription_start_site | - | 63772  | 63772  | -5037 | 6083 | AN10910 |
| 1063 | CONTIG123 | 7808   | 8154   | 1.66 | 2.05E-02 | transcription_start_site | - | 5149   | 5149   | -2832 | 6085 | AN10911 |
| 1063 | CONTIG123 | 7808   | 8154   | 1.66 | 2.05E-02 | transcription_start_site | - | 5024   | 5024   | -2957 | 6086 | AN10911 |
| 273  | CONTIG123 | 58357  | 58631  | 2.67 | 2.51E-04 | transcription_start_site | + | 58910  | 58910  | -416  | 6096 | AN10915 |
| 273  | CONTIG123 | 58357  | 58631  | 2.67 | 2.51E-04 | transcription_start_site | + | 59774  | 59774  | -1280 | 6097 | AN10915 |
| 1541 | CONTIG123 | 68637  | 68981  | 1.24 | 4.21E-02 | transcription_start_site | - | 67061  | 67061  | -1748 | 6098 | AN10916 |
| 1541 | CONTIG123 | 68637  | 68981  | 1.24 | 4.21E-02 | transcription_start_site | - | 66832  | 66832  | -1977 | 6099 | AN10916 |
| 1541 | CONTIG123 | 68637  | 68981  | 1.24 | 4.21E-02 | transcription_start_site | - | 66632  | 66632  | -2177 | 6100 | AN10916 |
| 1541 | CONTIG123 | 68637  | 68981  | 1.24 | 4.21E-02 | transcription_start_site | - | 66476  | 66476  | -2333 | 6101 | AN10916 |
| 1541 | CONTIG123 | 68637  | 68981  | 1.24 | 4.21E-02 | transcription_start_site | - | 66384  | 66384  | -2425 | 6102 | AN10916 |
| 1541 | CONTIG123 | 68637  | 68981  | 1.24 | 4.21E-02 | transcription_start_site | - | 66158  | 66158  | -2651 | 6103 | AN10916 |
| 1211 | CONTIG126 | 19201  | 19638  | 1.51 | 8.35E-04 | transcription_start_site | - | 18249  | 18249  | -1170 | 6117 | AN10921 |
| 1211 | CONTIG126 | 19201  | 19638  | 1.51 | 8.35E-04 | transcription_start_site | - | 18191  | 18191  | -1228 | 6118 | AN10921 |
| 1650 | CONTIG127 | 62557  | 62981  | 1.17 | 1.80E-02 | transcription_start_site | + | 66374  | 66374  | -3605 | 6122 | AN10923 |
| 2319 | CONTIG127 | 18764  | 19644  | 0.64 | 1.05E-01 | transcription_start_site | + | 22761  | 22761  | -3557 | 6127 | AN10926 |
| 449  | CONTIG127 | 9167   | 9741   | 2.38 | 0.00E+00 | transcription_start_site | - | 4298   | 4298   | -5156 | 6132 | AN10928 |
| 449  | CONTIG127 | 9167   | 9741   | 2.38 | 0.00E+00 | transcription_start_site | - | 4167   | 4167   | -5287 | 6133 | AN10928 |
| 1410 | CONTIG128 | 10809  | 11313  | 1.34 | 2.29E-02 | transcription_start_site | + | 13760  | 13760  | -2699 | 6137 | AN10929 |
| 1410 | CONTIG128 | 10809  | 11313  | 1.34 | 2.29E-02 | transcription_start_site | + | 14286  | 14286  | -3225 | 6138 | AN10929 |
| 1410 | CONTIG128 | 10809  | 11313  | 1.34 | 2.29E-02 | transcription_start_site | + | 15329  | 15329  | -4268 | 6139 | AN10929 |
| 1644 | CONTIG16  | 144616 | 144971 | 1.18 | 1.38E-01 | transcription_start_site | + | 149053 | 149053 | -4259 | 6140 | AN1093  |
| 1644 | CONTIG16  | 144616 | 144971 | 1.18 | 1.38E-01 | transcription_start_site | + | 149342 | 149342 | -4548 | 6141 | AN1093  |
| 1644 | CONTIG16  | 144616 | 144971 | 1.18 | 1.38E-01 | transcription_start_site | + | 149409 | 149409 | -4615 | 6142 | AN1093  |
| 1148 | CONTIG128 | 82810  | 83164  | 1.57 | 9.96E-03 | transcription_start_site | - | 79745  | 79745  | -3242 | 6144 | AN10930 |
| 1148 | CONTIG128 | 82810  | 83164  | 1.57 | 9.96E-03 | transcription_start_site | - | 79441  | 79441  | -3546 | 6145 | AN10930 |
| 1148 | CONTIG128 | 82810  | 83164  | 1.57 | 9.96E-03 | transcription_start_site | - | 79178  | 79178  | -3809 | 6146 | AN10930 |
| 1148 | CONTIG128 | 82810  | 83164  | 1.57 | 9.96E-03 | transcription_start_site | - | 78736  | 78736  | -4251 | 6147 | AN10930 |
| 1492 | CONTIG128 | 135157 | 135661 | 1.28 | 3.01E-02 | transcription_start_site | - | 131477 | 131477 | -3932 | 6152 | AN10932 |
| 1492 | CONTIG128 | 135157 | 135661 | 1.28 | 3.01E-02 | transcription_start_site | - | 131301 | 131301 | -4108 | 6153 | AN10932 |
| 1492 | CONTIG128 | 135157 | 135661 | 1.28 | 3.01E-02 | transcription_start_site | - | 130989 | 130989 | -4420 | 6154 | AN10932 |
| 1410 | CONTIG128 | 10809  | 11313  | 1.34 | 2.29E-02 | transcription_start_site | + | 16043  | 16043  | -4982 | 6162 | AN10934 |
| 444  | CONTIG16  | 155418 | 155832 | 2.4  | 4.57E-03 | transcription_start_site | - | 154989 | 154989 | -636  | 6178 | AN1094  |
| 444  | CONTIG16  | 155418 | 155832 | 2.4  | 4.57E-03 | transcription_start_site | - | 154577 | 154577 | -1048 | 6179 | AN1094  |
| 444  | CONTIG16  | 155418 | 155832 | 2.4  | 4.57E-03 | transcription_start_site | - | 154184 | 154184 | -1441 | 6180 | AN1094  |
| 444  | CONTIG16  | 155418 | 155832 | 2.4  | 4.57E-03 | transcription_start_site | - | 153141 | 153141 | -2484 | 6181 | AN1094  |
| 1312 | CONTIG129 | 292205 | 292564 | 1.43 | 4.78E-02 | transcription_start_site | - | 291869 | 291869 | -515  | 6203 | AN10945 |
| 1312 | CONTIG129 | 292205 | 292564 | 1.43 | 4.78E-02 | transcription_start_site | - | 291773 | 291773 | -611  | 6204 | AN10945 |
| 1312 | CONTIG129 | 292205 | 292564 | 1.43 | 4.78E-02 | transcription_start_site | - | 290998 | 290998 | -1386 | 6205 | AN10945 |
| 606  | CONTIG129 | 531606 | 531971 | 2.18 | 4.57E-03 | transcription_start_site | + | 532341 | 532341 | -552  | 6217 | AN10949 |
| 606  | CONTIG129 | 531606 | 531971 | 2.18 | 4.57E-03 | transcription_start_site | + | 533021 | 533021 | -1232 | 6218 | AN10949 |
| 606  | CONTIG129 | 531606 | 531971 | 2.18 | 4.57E-03 | transcription_start_site | + | 533512 | 533512 | -1723 | 6219 | AN10949 |

|      |           |        |        |      |          |                          |   |        |        |       |      |         |
|------|-----------|--------|--------|------|----------|--------------------------|---|--------|--------|-------|------|---------|
| 606  | CONTIG129 | 531606 | 531971 | 2.18 | 4.57E-03 | transcription_start_site | + | 534627 | 534627 | -2838 | 6220 | AN10949 |
| 606  | CONTIG129 | 531606 | 531971 | 2.18 | 4.57E-03 | transcription_start_site | + | 536166 | 536166 | -4377 | 6221 | AN10949 |
| 606  | CONTIG129 | 531606 | 531971 | 2.18 | 4.57E-03 | transcription_start_site | + | 536672 | 536672 | -4883 | 6222 | AN10949 |
| 29   | CONTIG16  | 163732 | 164237 | 3.36 | 0.00E+00 | transcription_start_site | - | 158931 | 158931 | -5053 | 6223 | AN1095  |
| 305  | CONTIG16  | 162078 | 162951 | 2.62 | 1.35E-03 | transcription_start_site | - | 158931 | 158931 | -3583 | 6223 | AN1095  |
| 305  | CONTIG16  | 162078 | 162951 | 2.62 | 1.35E-03 | transcription_start_site | - | 158558 | 158558 | -3956 | 6224 | AN1095  |
| 96   | CONTIG129 | 567609 | 567968 | 3.09 | 0.00E+00 | transcription_start_site | + | 568233 | 568233 | -444  | 6225 | AN10950 |
| 96   | CONTIG129 | 567609 | 567968 | 3.09 | 0.00E+00 | transcription_start_site | + | 568597 | 568597 | -808  | 6226 | AN10950 |
| 1995 | CONTIG129 | 621677 | 622041 | 0.95 | 1.97E-01 | transcription_start_site | + | 622319 | 622319 | -460  | 6230 | AN10952 |
| 1995 | CONTIG129 | 621677 | 622041 | 0.95 | 1.97E-01 | transcription_start_site | + | 623033 | 623033 | -1174 | 6231 | AN10952 |
| 1995 | CONTIG129 | 621677 | 622041 | 0.95 | 1.97E-01 | transcription_start_site | + | 623386 | 623386 | -1527 | 6232 | AN10952 |
| 1312 | CONTIG129 | 292205 | 292564 | 1.43 | 4.78E-02 | transcription_start_site | - | 290249 | 290249 | -2135 | 6250 | AN10957 |
| 1312 | CONTIG129 | 292205 | 292564 | 1.43 | 4.78E-02 | transcription_start_site | - | 290132 | 290132 | -2252 | 6251 | AN10957 |
| 1312 | CONTIG129 | 292205 | 292564 | 1.43 | 4.78E-02 | transcription_start_site | - | 289407 | 289407 | -2977 | 6252 | AN10957 |
| 1312 | CONTIG129 | 292205 | 292564 | 1.43 | 4.78E-02 | transcription_start_site | - | 287808 | 287808 | -4576 | 6253 | AN10958 |
| 29   | CONTIG16  | 163732 | 164237 | 3.36 | 0.00E+00 | transcription_start_site | - | 161667 | 161667 | -2317 | 6261 | AN1096  |
| 29   | CONTIG16  | 163732 | 164237 | 3.36 | 0.00E+00 | transcription_start_site | - | 161141 | 161141 | -2843 | 6262 | AN1096  |
| 29   | CONTIG16  | 163732 | 164237 | 3.36 | 0.00E+00 | transcription_start_site | - | 160812 | 160812 | -3172 | 6263 | AN1096  |
| 145  | CONTIG16  | 165827 | 166491 | 2.97 | 2.26E-04 | transcription_start_site | - | 161667 | 161667 | -4492 | 6261 | AN1096  |
| 145  | CONTIG16  | 165827 | 166491 | 2.97 | 2.26E-04 | transcription_start_site | - | 161141 | 161141 | -5018 | 6262 | AN1096  |
| 305  | CONTIG16  | 162078 | 162951 | 2.62 | 1.35E-03 | transcription_start_site | - | 161667 | 161667 | -847  | 6261 | AN1096  |
| 305  | CONTIG16  | 162078 | 162951 | 2.62 | 1.35E-03 | transcription_start_site | - | 161141 | 161141 | -1373 | 6262 | AN1096  |
| 305  | CONTIG16  | 162078 | 162951 | 2.62 | 1.35E-03 | transcription_start_site | - | 160812 | 160812 | -1702 | 6263 | AN1096  |
| 573  | CONTIG129 | 555988 | 556492 | 2.22 | 4.01E-03 | transcription_start_site | + | 560242 | 560242 | -4002 | 6275 | AN10964 |
| 1995 | CONTIG129 | 621677 | 622041 | 0.95 | 1.97E-01 | transcription_start_site | + | 624676 | 624676 | -2817 | 6276 | AN10965 |
| 1995 | CONTIG129 | 621677 | 622041 | 0.95 | 1.97E-01 | transcription_start_site | + | 624844 | 624844 | -2985 | 6277 | AN10965 |
| 1995 | CONTIG129 | 621677 | 622041 | 0.95 | 1.97E-01 | transcription_start_site | + | 625037 | 625037 | -3178 | 6278 | AN10965 |
| 1995 | CONTIG129 | 621677 | 622041 | 0.95 | 1.97E-01 | transcription_start_site | + | 625170 | 625170 | -3311 | 6279 | AN10965 |
| 1995 | CONTIG129 | 621677 | 622041 | 0.95 | 1.97E-01 | transcription_start_site | + | 625352 | 625352 | -3493 | 6280 | AN10965 |
| 1995 | CONTIG129 | 621677 | 622041 | 0.95 | 1.97E-01 | transcription_start_site | + | 625911 | 625911 | -4052 | 6281 | AN10966 |
| 1995 | CONTIG129 | 621677 | 622041 | 0.95 | 1.97E-01 | transcription_start_site | + | 625989 | 625989 | -4130 | 6282 | AN10966 |
| 1995 | CONTIG129 | 621677 | 622041 | 0.95 | 1.97E-01 | transcription_start_site | + | 626100 | 626100 | -4241 | 6283 | AN10966 |
| 1995 | CONTIG129 | 621677 | 622041 | 0.95 | 1.97E-01 | transcription_start_site | + | 626324 | 626324 | -4465 | 6284 | AN10966 |
| 2053 | CONTIG129 | 30469  | 31938  | 0.91 | 1.23E-01 | transcription_start_site | + | 32498  | 32498  | -1294 | 6285 | AN10967 |
| 2053 | CONTIG129 | 30469  | 31938  | 0.91 | 1.23E-01 | transcription_start_site | + | 32626  | 32626  | -1422 | 6286 | AN10967 |
| 602  | CONTIG129 | 278180 | 279289 | 2.18 | 1.41E-03 | transcription_start_site | + | 279659 | 279659 | -924  | 6287 | AN10968 |
| 1311 | CONTIG129 | 277432 | 278004 | 1.43 | 4.78E-02 | transcription_start_site | + | 279659 | 279659 | -1941 | 6287 | AN10968 |
| 1269 | CONTIG129 | 573694 | 574118 | 1.47 | 4.20E-02 | transcription_start_site | + | 574514 | 574514 | -608  | 6288 | AN10969 |
| 1677 | CONTIG129 | 571519 | 572078 | 1.15 | 6.50E-02 | transcription_start_site | + | 574514 | 574514 | -2715 | 6288 | AN10969 |
| 1645 | CONTIG16  | 173716 | 174072 | 1.18 | 1.38E-01 | transcription_start_site | - | 173297 | 173297 | -597  | 6289 | AN1097  |
| 606  | CONTIG129 | 531606 | 531971 | 2.18 | 4.57E-03 | transcription_start_site | + | 531082 | 531082 | 706   | 6301 | AN10972 |
| 606  | CONTIG129 | 531606 | 531971 | 2.18 | 4.57E-03 | transcription_start_site | + | 530795 | 530795 | 993   | 6300 | AN10972 |
| 1376 | CONTIG130 | 35043  | 35753  | 1.37 | 2.66E-02 | transcription_start_site | + | 38136  | 38136  | -2738 | 6306 | AN10974 |
| 1376 | CONTIG130 | 35043  | 35753  | 1.37 | 2.66E-02 | transcription_start_site | + | 38485  | 38485  | -3087 | 6307 | AN10974 |
| 1711 | CONTIG130 | 37438  | 38008  | 1.13 | 6.50E-02 | transcription_start_site | + | 38136  | 38136  | -413  | 6306 | AN10974 |
| 1711 | CONTIG130 | 37438  | 38008  | 1.13 | 6.50E-02 | transcription_start_site | + | 38485  | 38485  | -762  | 6307 | AN10974 |
| 1714 | CONTIG130 | 33303  | 33589  | 1.13 | 1.08E-01 | transcription_start_site | + | 38136  | 38136  | -4690 | 6306 | AN10974 |
| 1714 | CONTIG130 | 33303  | 33589  | 1.13 | 1.08E-01 | transcription_start_site | + | 38485  | 38485  | -5039 | 6307 | AN10974 |
| 1880 | CONTIG130 | 42392  | 43636  | 1.02 | 5.40E-02 | transcription_start_site | + | 46325  | 46325  | -3311 | 6308 | AN10975 |
| 1880 | CONTIG130 | 42392  | 43636  | 1.02 | 5.40E-02 | transcription_start_site | + | 46537  | 46537  | -3523 | 6309 | AN10975 |
| 1880 | CONTIG130 | 42392  | 43636  | 1.02 | 5.40E-02 | transcription_start_site | + | 46897  | 46897  | -3883 | 6310 | AN10975 |
| 203  | CONTIG130 | 125035 | 125319 | 2.81 | 0.00E+00 | transcription_start_site | - | 124439 | 124439 | -738  | 6315 | AN10977 |
| 819  | CONTIG130 | 153226 | 153670 | 1.91 | 9.96E-03 | transcription_start_site | - | 149936 | 149936 | -3512 | 6316 | AN10978 |
| 819  | CONTIG130 | 153226 | 153670 | 1.91 | 9.96E-03 | transcription_start_site | - | 149814 | 149814 | -3634 | 6317 | AN10978 |
| 819  | CONTIG130 | 153226 | 153670 | 1.91 | 9.96E-03 | transcription_start_site | - | 148646 | 148646 | -4802 | 6318 | AN10978 |
| 1336 | CONTIG130 | 161342 | 161601 | 1.41 | 4.78E-02 | transcription_start_site | - | 157181 | 157181 | -4290 | 6319 | AN10979 |
| 1336 | CONTIG130 | 161342 | 161601 | 1.41 | 4.78E-02 | transcription_start_site | - | 156432 | 156432 | -5039 | 6320 | AN10979 |

|      |           |        |        |      |          |                          |   |        |        |       |      |         |
|------|-----------|--------|--------|------|----------|--------------------------|---|--------|--------|-------|------|---------|
| 1340 | CONTIG16  | 169145 | 170095 | 1.4  | 1.27E-02 | transcription_start_site | + | 173609 | 173609 | -3989 | 6322 | AN1098  |
| 1340 | CONTIG16  | 169145 | 170095 | 1.4  | 1.27E-02 | transcription_start_site | + | 173767 | 173767 | -4147 | 6323 | AN1098  |
| 1645 | CONTIG16  | 173716 | 174072 | 1.18 | 1.38E-01 | transcription_start_site | + | 173767 | 173767 | 127   | 6323 | AN1098  |
| 1645 | CONTIG16  | 173716 | 174072 | 1.18 | 1.38E-01 | transcription_start_site | + | 173609 | 173609 | 285   | 6322 | AN1098  |
| 2012 | CONTIG130 | 169733 | 170087 | 0.94 | 1.97E-01 | transcription_start_site | - | 169647 | 169647 | -263  | 6324 | AN10980 |
| 2012 | CONTIG130 | 169733 | 170087 | 0.94 | 1.97E-01 | transcription_start_site | - | 169543 | 169543 | -367  | 6325 | AN10980 |
| 2012 | CONTIG130 | 169733 | 170087 | 0.94 | 1.97E-01 | transcription_start_site | - | 169415 | 169415 | -495  | 6326 | AN10980 |
| 2012 | CONTIG130 | 169733 | 170087 | 0.94 | 1.97E-01 | transcription_start_site | - | 168843 | 168843 | -1067 | 6327 | AN10980 |
| 2012 | CONTIG130 | 169733 | 170087 | 0.94 | 1.97E-01 | transcription_start_site | + | 174014 | 174014 | -4104 | 6328 | AN10981 |
| 2012 | CONTIG130 | 169733 | 170087 | 0.94 | 1.97E-01 | transcription_start_site | + | 174168 | 174168 | -4258 | 6329 | AN10981 |
| 479  | CONTIG130 | 191257 | 191526 | 2.34 | 1.77E-03 | transcription_start_site | - | 190738 | 190738 | -653  | 6332 | AN10982 |
| 479  | CONTIG130 | 191257 | 191526 | 2.34 | 1.77E-03 | transcription_start_site | - | 190431 | 190431 | -960  | 6333 | AN10982 |
| 479  | CONTIG130 | 191257 | 191526 | 2.34 | 1.77E-03 | transcription_start_site | - | 190239 | 190239 | -1152 | 6334 | AN10982 |
| 479  | CONTIG130 | 191257 | 191526 | 2.34 | 1.77E-03 | transcription_start_site | - | 190100 | 190100 | -1291 | 6335 | AN10982 |
| 479  | CONTIG130 | 191257 | 191526 | 2.34 | 1.77E-03 | transcription_start_site | - | 188135 | 188135 | -3256 | 6336 | AN10982 |
| 479  | CONTIG130 | 191257 | 191526 | 2.34 | 1.77E-03 | transcription_start_site | - | 188060 | 188060 | -3331 | 6337 | AN10982 |
| 1427 | CONTIG130 | 258539 | 258953 | 1.33 | 6.04E-02 | transcription_start_site | + | 260417 | 260417 | -1671 | 6338 | AN10983 |
| 1946 | CONTIG130 | 259889 | 260153 | 0.98 | 1.76E-01 | transcription_start_site | + | 260417 | 260417 | -396  | 6338 | AN10983 |
| 1776 | CONTIG130 | 271220 | 271634 | 1.09 | 1.22E-01 | transcription_start_site | + | 272859 | 272859 | -1432 | 6339 | AN10984 |
| 1776 | CONTIG130 | 271220 | 271634 | 1.09 | 1.22E-01 | transcription_start_site | + | 273185 | 273185 | -1758 | 6340 | AN10984 |
| 1776 | CONTIG130 | 271220 | 271634 | 1.09 | 1.22E-01 | transcription_start_site | + | 273361 | 273361 | -1934 | 6341 | AN10984 |
| 1776 | CONTIG130 | 271220 | 271634 | 1.09 | 1.22E-01 | transcription_start_site | + | 273422 | 273422 | -1995 | 6342 | AN10984 |
| 1776 | CONTIG130 | 271220 | 271634 | 1.09 | 1.22E-01 | transcription_start_site | + | 273722 | 273722 | -2295 | 6343 | AN10984 |
| 1776 | CONTIG130 | 271220 | 271634 | 1.09 | 1.22E-01 | transcription_start_site | + | 273923 | 273923 | -2496 | 6344 | AN10984 |
| 1776 | CONTIG130 | 271220 | 271634 | 1.09 | 1.22E-01 | transcription_start_site | + | 274413 | 274413 | -2986 | 6345 | AN10984 |
| 1776 | CONTIG130 | 271220 | 271634 | 1.09 | 1.22E-01 | transcription_start_site | + | 274486 | 274486 | -3059 | 6346 | AN10984 |
| 1880 | CONTIG130 | 42392  | 43636  | 1.02 | 5.40E-02 | transcription_start_site | + | 47958  | 47958  | -4944 | 6351 | AN10987 |
| 203  | CONTIG130 | 125035 | 125319 | 2.81 | 0.00E+00 | transcription_start_site | - | 123623 | 123623 | -1554 | 6352 | AN10988 |
| 203  | CONTIG130 | 125035 | 125319 | 2.81 | 0.00E+00 | transcription_start_site | - | 122447 | 122447 | -2730 | 6353 | AN10988 |
| 538  | CONTIG16  | 179026 | 179395 | 2.27 | 7.08E-03 | transcription_start_site | + | 178571 | 178571 | 639   | 6360 | AN1099  |
| 1645 | CONTIG16  | 173716 | 174072 | 1.18 | 1.38E-01 | transcription_start_site | + | 177199 | 177199 | -3305 | 6355 | AN1099  |
| 1645 | CONTIG16  | 173716 | 174072 | 1.18 | 1.38E-01 | transcription_start_site | + | 177293 | 177293 | -3399 | 6356 | AN1099  |
| 1645 | CONTIG16  | 173716 | 174072 | 1.18 | 1.38E-01 | transcription_start_site | + | 177695 | 177695 | -3801 | 6357 | AN1099  |
| 1645 | CONTIG16  | 173716 | 174072 | 1.18 | 1.38E-01 | transcription_start_site | + | 177894 | 177894 | -4000 | 6358 | AN1099  |
| 1645 | CONTIG16  | 173716 | 174072 | 1.18 | 1.38E-01 | transcription_start_site | + | 178013 | 178013 | -4119 | 6359 | AN1099  |
| 1645 | CONTIG16  | 173716 | 174072 | 1.18 | 1.38E-01 | transcription_start_site | + | 178571 | 178571 | -4677 | 6360 | AN1099  |
| 1427 | CONTIG130 | 258539 | 258953 | 1.33 | 6.04E-02 | transcription_start_site | + | 259020 | 259020 | -274  | 6362 | AN10991 |
| 1946 | CONTIG130 | 259889 | 260153 | 0.98 | 1.76E-01 | transcription_start_site | + | 259020 | 259020 | 1001  | 6362 | AN10991 |
| 479  | CONTIG130 | 191257 | 191526 | 2.34 | 1.77E-03 | transcription_start_site | - | 186832 | 186832 | -4559 | 6365 | AN10993 |
| 479  | CONTIG130 | 191257 | 191526 | 2.34 | 1.77E-03 | transcription_start_site | - | 186680 | 186680 | -4711 | 6366 | AN10993 |
| 596  | CONTIG130 | 205730 | 206095 | 2.19 | 4.01E-03 | transcription_start_site | - | 205278 | 205278 | -634  | 6370 | AN10995 |
| 596  | CONTIG130 | 205730 | 206095 | 2.19 | 4.01E-03 | transcription_start_site | - | 205163 | 205163 | -749  | 6371 | AN10995 |
| 1376 | CONTIG130 | 35043  | 35753  | 1.37 | 2.66E-02 | transcription_start_site | + | 39204  | 39204  | -3806 | 6372 | AN10996 |
| 1376 | CONTIG130 | 35043  | 35753  | 1.37 | 2.66E-02 | transcription_start_site | + | 39485  | 39485  | -4087 | 6373 | AN10996 |
| 1376 | CONTIG130 | 35043  | 35753  | 1.37 | 2.66E-02 | transcription_start_site | + | 40708  | 40708  | -5310 | 6374 | AN10996 |
| 1711 | CONTIG130 | 37438  | 38008  | 1.13 | 6.50E-02 | transcription_start_site | + | 39204  | 39204  | -1481 | 6372 | AN10996 |
| 1711 | CONTIG130 | 37438  | 38008  | 1.13 | 6.50E-02 | transcription_start_site | + | 39485  | 39485  | -1762 | 6373 | AN10996 |
| 1711 | CONTIG130 | 37438  | 38008  | 1.13 | 6.50E-02 | transcription_start_site | + | 40708  | 40708  | -2985 | 6374 | AN10996 |
| 1711 | CONTIG130 | 37438  | 38008  | 1.13 | 6.50E-02 | transcription_start_site | + | 40841  | 40841  | -3118 | 6375 | AN10996 |
| 2012 | CONTIG130 | 169733 | 170087 | 0.94 | 1.97E-01 | transcription_start_site | - | 168610 | 168610 | -1300 | 6380 | AN10999 |
| 2012 | CONTIG130 | 169733 | 170087 | 0.94 | 1.97E-01 | transcription_start_site | - | 167510 | 167510 | -2400 | 6381 | AN10999 |
| 1776 | CONTIG130 | 271220 | 271634 | 1.09 | 1.22E-01 | transcription_start_site | + | 271590 | 271590 | -163  | 6383 | AN11000 |
| 1776 | CONTIG130 | 271220 | 271634 | 1.09 | 1.22E-01 | transcription_start_site | + | 272176 | 272176 | -749  | 6384 | AN11000 |
| 2170 | CONTIG132 | 90906  | 91259  | 0.82 | 1.38E-01 | transcription_start_site | - | 87608  | 87608  | -3474 | 6423 | AN11009 |
| 2170 | CONTIG132 | 90906  | 91259  | 0.82 | 1.38E-01 | transcription_start_site | - | 87519  | 87519  | -3563 | 6424 | AN11009 |
| 2171 | CONTIG132 | 143043 | 143377 | 0.82 | 1.38E-01 | transcription_start_site | - | 140735 | 140735 | -2475 | 6429 | AN11010 |
| 2171 | CONTIG132 | 143043 | 143377 | 0.82 | 1.38E-01 | transcription_start_site | - | 139879 | 139879 | -3331 | 6430 | AN11010 |

|      |           |        |        |      |          |                          |   |        |        |       |      |         |
|------|-----------|--------|--------|------|----------|--------------------------|---|--------|--------|-------|------|---------|
| 2171 | CONTIG132 | 143043 | 143377 | 0.82 | 1.38E-01 | transcription_start_site | - | 139482 | 139482 | -3728 | 6431 | AN11010 |
| 1850 | CONTIG132 | 153303 | 154777 | 1.04 | 6.04E-02 | transcription_start_site | - | 154173 | 154173 | 133   | 6435 | AN11011 |
| 1850 | CONTIG132 | 153303 | 154777 | 1.04 | 6.04E-02 | transcription_start_site | - | 154413 | 154413 | 373   | 6434 | AN11011 |
| 1850 | CONTIG132 | 153303 | 154777 | 1.04 | 6.04E-02 | transcription_start_site | - | 155708 | 155708 | 1668  | 6433 | AN11011 |
| 1850 | CONTIG132 | 153303 | 154777 | 1.04 | 6.04E-02 | transcription_start_site | - | 153249 | 153249 | -791  | 6443 | AN11016 |
| 1850 | CONTIG132 | 153303 | 154777 | 1.04 | 6.04E-02 | transcription_start_site | - | 152227 | 152227 | -1813 | 6444 | AN11016 |
| 631  | CONTIG16  | 193816 | 194225 | 2.14 | 9.96E-03 | transcription_start_site | - | 193511 | 193511 | -509  | 6453 | AN1102  |
| 2202 | CONTIG132 | 217726 | 219200 | 0.79 | 9.90E-02 | transcription_start_site | + | 219987 | 219987 | -1524 | 6455 | AN11021 |
| 2202 | CONTIG132 | 217726 | 219200 | 0.79 | 9.90E-02 | transcription_start_site | + | 220059 | 220059 | -1596 | 6456 | AN11021 |
| 2202 | CONTIG132 | 217726 | 219200 | 0.79 | 9.90E-02 | transcription_start_site | + | 220336 | 220336 | -1873 | 6457 | AN11021 |
| 2350 | CONTIG135 | 31437  | 32301  | 0.55 | 1.81E-01 | transcription_start_site | + | 31536  | 31536  | 333   | 6471 | AN11028 |
| 2350 | CONTIG135 | 31437  | 32301  | 0.55 | 1.81E-01 | transcription_start_site | + | 32236  | 32236  | -367  | 6472 | AN11028 |
| 2350 | CONTIG135 | 31437  | 32301  | 0.55 | 1.81E-01 | transcription_start_site | + | 32605  | 32605  | -736  | 6473 | AN11028 |
| 631  | CONTIG16  | 193816 | 194225 | 2.14 | 9.96E-03 | transcription_start_site | + | 196880 | 196880 | -2859 | 6479 | AN1103  |
| 631  | CONTIG16  | 193816 | 194225 | 2.14 | 9.96E-03 | transcription_start_site | + | 197157 | 197157 | -3136 | 6480 | AN1103  |
| 2350 | CONTIG135 | 31437  | 32301  | 0.55 | 1.81E-01 | transcription_start_site | + | 33799  | 33799  | -1930 | 6485 | AN11031 |
| 2350 | CONTIG135 | 31437  | 32301  | 0.55 | 1.81E-01 | transcription_start_site | + | 34254  | 34254  | -2385 | 6486 | AN11031 |
| 2350 | CONTIG135 | 31437  | 32301  | 0.55 | 1.81E-01 | transcription_start_site | + | 34572  | 34572  | -2703 | 6487 | AN11031 |
| 2350 | CONTIG135 | 31437  | 32301  | 0.55 | 1.81E-01 | transcription_start_site | + | 35056  | 35056  | -3187 | 6488 | AN11031 |
| 2350 | CONTIG135 | 31437  | 32301  | 0.55 | 1.81E-01 | transcription_start_site | + | 35482  | 35482  | -3613 | 6489 | AN11031 |
| 153  | CONTIG139 | 59555  | 59919  | 2.94 | 0.00E+00 | transcription_start_site | + | 59794  | 59794  | -57   | 6491 | AN11032 |
| 153  | CONTIG139 | 59555  | 59919  | 2.94 | 0.00E+00 | transcription_start_site | + | 59677  | 59677  | 60    | 6490 | AN11032 |
| 153  | CONTIG139 | 59555  | 59919  | 2.94 | 0.00E+00 | transcription_start_site | + | 59923  | 59923  | -186  | 6492 | AN11032 |
| 153  | CONTIG139 | 59555  | 59919  | 2.94 | 0.00E+00 | transcription_start_site | + | 60194  | 60194  | -457  | 6493 | AN11032 |
| 153  | CONTIG139 | 59555  | 59919  | 2.94 | 0.00E+00 | transcription_start_site | + | 60792  | 60792  | -1055 | 6494 | AN11032 |
| 153  | CONTIG139 | 59555  | 59919  | 2.94 | 0.00E+00 | transcription_start_site | + | 61478  | 61478  | -1741 | 6495 | AN11032 |
| 810  | CONTIG139 | 61370  | 61639  | 1.92 | 2.32E-03 | transcription_start_site | + | 61478  | 61478  | 26    | 6495 | AN11032 |
| 810  | CONTIG139 | 61370  | 61639  | 1.92 | 2.32E-03 | transcription_start_site | + | 60792  | 60792  | 712   | 6494 | AN11032 |
| 2210 | CONTIG139 | 56630  | 58269  | 0.78 | 1.34E-01 | transcription_start_site | + | 59677  | 59677  | -2227 | 6490 | AN11032 |
| 2210 | CONTIG139 | 56630  | 58269  | 0.78 | 1.34E-01 | transcription_start_site | + | 59794  | 59794  | -2344 | 6491 | AN11032 |
| 2210 | CONTIG139 | 56630  | 58269  | 0.78 | 1.34E-01 | transcription_start_site | + | 59923  | 59923  | -2473 | 6492 | AN11032 |
| 2210 | CONTIG139 | 56630  | 58269  | 0.78 | 1.34E-01 | transcription_start_site | + | 60194  | 60194  | -2744 | 6493 | AN11032 |
| 2210 | CONTIG139 | 56630  | 58269  | 0.78 | 1.34E-01 | transcription_start_site | + | 60792  | 60792  | -3342 | 6494 | AN11032 |
| 2210 | CONTIG139 | 56630  | 58269  | 0.78 | 1.34E-01 | transcription_start_site | + | 61478  | 61478  | -4028 | 6495 | AN11032 |
| 1654 | CONTIG139 | 108091 | 108655 | 1.17 | 4.78E-02 | transcription_start_site | - | 108146 | 108146 | -227  | 6523 | AN11039 |
| 1654 | CONTIG139 | 108091 | 108655 | 1.17 | 4.78E-02 | transcription_start_site | - | 107784 | 107784 | -589  | 6524 | AN11039 |
| 1654 | CONTIG139 | 108091 | 108655 | 1.17 | 4.78E-02 | transcription_start_site | - | 107467 | 107467 | -906  | 6525 | AN11039 |
| 2210 | CONTIG139 | 56630  | 58269  | 0.78 | 1.34E-01 | transcription_start_site | + | 57476  | 57476  | -26   | 6537 | AN11045 |
| 1814 | CONTIG141 | 184207 | 184476 | 1.06 | 5.36E-02 | transcription_start_site | - | 179802 | 179802 | -4539 | 6561 | AN11052 |
| 1959 | CONTIG144 | 40069  | 40558  | 0.97 | 7.66E-02 | transcription_start_site | - | 41277  | 41277  | 963   | 6571 | AN11055 |
| 687  | CONTIG144 | 49440  | 49779  | 2.06 | 2.26E-04 | transcription_start_site | - | 50541  | 50541  | 931   | 6573 | AN11056 |
| 1959 | CONTIG144 | 40069  | 40558  | 0.97 | 7.66E-02 | transcription_start_site | - | 40270  | 40270  | -43   | 6588 | AN11060 |
| 1959 | CONTIG144 | 40069  | 40558  | 0.97 | 7.66E-02 | transcription_start_site | - | 40076  | 40076  | -237  | 6589 | AN11060 |
| 687  | CONTIG144 | 49440  | 49779  | 2.06 | 2.26E-04 | transcription_start_site | - | 48824  | 48824  | -785  | 6590 | AN11061 |
| 687  | CONTIG144 | 49440  | 49779  | 2.06 | 2.26E-04 | transcription_start_site | - | 48658  | 48658  | -951  | 6591 | AN11061 |
| 687  | CONTIG144 | 49440  | 49779  | 2.06 | 2.26E-04 | transcription_start_site | - | 47981  | 47981  | -1628 | 6592 | AN11061 |
| 85   | CONTIG145 | 39981  | 40552  | 3.12 | 0.00E+00 | transcription_start_site | + | 41667  | 41667  | -1400 | 6597 | AN11064 |
| 85   | CONTIG145 | 39981  | 40552  | 3.12 | 0.00E+00 | transcription_start_site | + | 41852  | 41852  | -1585 | 6598 | AN11064 |
| 85   | CONTIG145 | 39981  | 40552  | 3.12 | 0.00E+00 | transcription_start_site | + | 42547  | 42547  | -2280 | 6599 | AN11064 |
| 85   | CONTIG145 | 39981  | 40552  | 3.12 | 0.00E+00 | transcription_start_site | + | 42784  | 42784  | -2517 | 6600 | AN11064 |
| 85   | CONTIG145 | 39981  | 40552  | 3.12 | 0.00E+00 | transcription_start_site | + | 43412  | 43412  | -3145 | 6618 | AN11070 |
| 1957 | CONTIG153 | 198771 | 199551 | 0.97 | 6.74E-02 | transcription_start_site | + | 201065 | 201065 | -1904 | 6653 | AN11083 |
| 1957 | CONTIG153 | 198771 | 199551 | 0.97 | 6.74E-02 | transcription_start_site | + | 201150 | 201150 | -1989 | 6654 | AN11083 |
| 2230 | CONTIG157 | 64670  | 65103  | 0.77 | 1.97E-01 | transcription_start_site | + | 70079  | 70079  | -5192 | 6662 | AN11087 |
| 1235 | CONTIG158 | 54387  | 54738  | 1.5  | 7.66E-02 | transcription_start_site | - | 53409  | 53409  | -1153 | 6674 | AN11090 |
| 1235 | CONTIG158 | 54387  | 54738  | 1.5  | 7.66E-02 | transcription_start_site | - | 52987  | 52987  | -1575 | 6675 | AN11090 |
| 1235 | CONTIG158 | 54387  | 54738  | 1.5  | 7.66E-02 | transcription_start_site | - | 52495  | 52495  | -2067 | 6676 | AN11090 |



|      |           |        |        |      |          |                          |   |        |        |       |      |         |
|------|-----------|--------|--------|------|----------|--------------------------|---|--------|--------|-------|------|---------|
| 1235 | CONTIG158 | 54387  | 54738  | 1.5  | 7.66E-02 | transcription_start_site | - | 52339  | 52339  | -2223 | 6677 | AN11090 |
| 1791 | CONTIG158 | 51527  | 52486  | 1.08 | 1.23E-01 | transcription_start_site | - | 52339  | 52339  | 332   | 6677 | AN11090 |
| 1791 | CONTIG158 | 51527  | 52486  | 1.08 | 1.23E-01 | transcription_start_site | - | 52495  | 52495  | 488   | 6676 | AN11090 |
| 1791 | CONTIG158 | 51527  | 52486  | 1.08 | 1.23E-01 | transcription_start_site | - | 52987  | 52987  | 980   | 6675 | AN11090 |
| 1791 | CONTIG158 | 51527  | 52486  | 1.08 | 1.23E-01 | transcription_start_site | - | 53409  | 53409  | 1402  | 6674 | AN11090 |
| 651  | CONTIG158 | 102544 | 102826 | 2.11 | 1.54E-02 | transcription_start_site | - | 102293 | 102293 | -392  | 6682 | AN11093 |
| 651  | CONTIG158 | 102544 | 102826 | 2.11 | 1.54E-02 | transcription_start_site | - | 101273 | 101273 | -1412 | 6683 | AN11093 |
| 651  | CONTIG158 | 102544 | 102826 | 2.11 | 1.54E-02 | transcription_start_site | - | 100860 | 100860 | -1825 | 6684 | AN11093 |
| 1235 | CONTIG158 | 54387  | 54738  | 1.5  | 7.66E-02 | transcription_start_site | - | 51814  | 51814  | -2748 | 6686 | AN11095 |
| 1235 | CONTIG158 | 54387  | 54738  | 1.5  | 7.66E-02 | transcription_start_site | - | 51436  | 51436  | -3126 | 6687 | AN11095 |
| 1235 | CONTIG158 | 54387  | 54738  | 1.5  | 7.66E-02 | transcription_start_site | - | 50719  | 50719  | -3843 | 6688 | AN11095 |
| 1791 | CONTIG158 | 51527  | 52486  | 1.08 | 1.23E-01 | transcription_start_site | - | 51814  | 51814  | -192  | 6686 | AN11095 |
| 1791 | CONTIG158 | 51527  | 52486  | 1.08 | 1.23E-01 | transcription_start_site | - | 51436  | 51436  | -570  | 6687 | AN11095 |
| 1791 | CONTIG158 | 51527  | 52486  | 1.08 | 1.23E-01 | transcription_start_site | - | 50719  | 50719  | -1287 | 6688 | AN11095 |
| 744  | CONTIG158 | 75902  | 76257  | 2.01 | 2.05E-02 | transcription_start_site | - | 70903  | 70903  | -5176 | 6700 | AN11099 |
| 651  | CONTIG158 | 102544 | 102826 | 2.11 | 1.54E-02 | transcription_start_site | - | 102474 | 102474 | -211  | 6714 | AN11100 |
| 651  | CONTIG158 | 102544 | 102826 | 2.11 | 1.54E-02 | transcription_start_site | - | 103135 | 103135 | 450   | 6713 | AN11100 |
| 651  | CONTIG158 | 102544 | 102826 | 2.11 | 1.54E-02 | transcription_start_site | - | 103536 | 103536 | 851   | 6712 | AN11100 |
| 1294 | CONTIG160 | 13656  | 15209  | 1.45 | 5.49E-02 | transcription_start_site | + | 17545  | 17545  | -3112 | 6715 | AN11101 |
| 1294 | CONTIG160 | 13656  | 15209  | 1.45 | 5.49E-02 | transcription_start_site | + | 18181  | 18181  | -3748 | 6716 | AN11101 |
| 1294 | CONTIG160 | 13656  | 15209  | 1.45 | 5.49E-02 | transcription_start_site | + | 18956  | 18956  | -4523 | 6717 | AN11101 |
| 257  | CONTIG160 | 125112 | 125381 | 2.7  | 4.01E-03 | transcription_start_site | + | 127330 | 127330 | -2083 | 6733 | AN11105 |
| 257  | CONTIG160 | 125112 | 125381 | 2.7  | 4.01E-03 | transcription_start_site | + | 128289 | 128289 | -3042 | 6734 | AN11105 |
| 257  | CONTIG160 | 125112 | 125381 | 2.7  | 4.01E-03 | transcription_start_site | + | 125879 | 125879 | -632  | 6740 | AN11108 |
| 1294 | CONTIG160 | 13656  | 15209  | 1.45 | 5.49E-02 | transcription_start_site | + | 15719  | 15719  | -1286 | 6741 | AN11109 |
| 1294 | CONTIG160 | 13656  | 15209  | 1.45 | 5.49E-02 | transcription_start_site | + | 16061  | 16061  | -1628 | 6742 | AN11109 |
| 1580 | CONTIG161 | 29860  | 30219  | 1.22 | 1.97E-01 | transcription_start_site | + | 32027  | 32027  | -1987 | 6745 | AN11111 |
| 1580 | CONTIG161 | 29860  | 30219  | 1.22 | 1.97E-01 | transcription_start_site | + | 32422  | 32422  | -2382 | 6746 | AN11111 |
| 1580 | CONTIG161 | 29860  | 30219  | 1.22 | 1.97E-01 | transcription_start_site | + | 32529  | 32529  | -2489 | 6747 | AN11111 |
| 1580 | CONTIG161 | 29860  | 30219  | 1.22 | 1.97E-01 | transcription_start_site | + | 33351  | 33351  | -3311 | 6748 | AN11111 |
| 491  | CONTIG161 | 69844  | 70178  | 2.33 | 1.37E-02 | transcription_start_site | + | 70318  | 70318  | -307  | 6749 | AN11112 |
| 491  | CONTIG161 | 69844  | 70178  | 2.33 | 1.37E-02 | transcription_start_site | + | 70486  | 70486  | -475  | 6750 | AN11112 |
| 491  | CONTIG161 | 69844  | 70178  | 2.33 | 1.37E-02 | transcription_start_site | + | 70594  | 70594  | -583  | 6751 | AN11112 |
| 491  | CONTIG161 | 69844  | 70178  | 2.33 | 1.37E-02 | transcription_start_site | + | 70754  | 70754  | -743  | 6752 | AN11112 |
| 1055 | CONTIG161 | 66081  | 66594  | 1.67 | 3.61E-02 | transcription_start_site | + | 70318  | 70318  | -3980 | 6749 | AN11112 |
| 1055 | CONTIG161 | 66081  | 66594  | 1.67 | 3.61E-02 | transcription_start_site | + | 70486  | 70486  | -4148 | 6750 | AN11112 |
| 1055 | CONTIG161 | 66081  | 66594  | 1.67 | 3.61E-02 | transcription_start_site | + | 70594  | 70594  | -4256 | 6751 | AN11112 |
| 1055 | CONTIG161 | 66081  | 66594  | 1.67 | 3.61E-02 | transcription_start_site | + | 70754  | 70754  | -4416 | 6752 | AN11112 |
| 1580 | CONTIG161 | 29860  | 30219  | 1.22 | 1.97E-01 | transcription_start_site | + | 34056  | 34056  | -4016 | 6764 | AN11115 |
| 1580 | CONTIG161 | 29860  | 30219  | 1.22 | 1.97E-01 | transcription_start_site | + | 34219  | 34219  | -4179 | 6765 | AN11115 |
| 1580 | CONTIG161 | 29860  | 30219  | 1.22 | 1.97E-01 | transcription_start_site | + | 30212  | 30212  | -172  | 6766 | AN11116 |
| 1580 | CONTIG161 | 29860  | 30219  | 1.22 | 1.97E-01 | transcription_start_site | + | 30440  | 30440  | -400  | 6767 | AN11116 |
| 1580 | CONTIG161 | 29860  | 30219  | 1.22 | 1.97E-01 | transcription_start_site | + | 30599  | 30599  | -559  | 6768 | AN11116 |
| 491  | CONTIG161 | 69844  | 70178  | 2.33 | 1.37E-02 | transcription_start_site | + | 71963  | 71963  | -1952 | 6773 | AN11118 |
| 491  | CONTIG161 | 69844  | 70178  | 2.33 | 1.37E-02 | transcription_start_site | + | 72412  | 72412  | -2401 | 6774 | AN11118 |
| 765  | CONTIG161 | 103878 | 105059 | 1.98 | 1.61E-02 | transcription_start_site | + | 104956 | 104956 | -487  | 6775 | AN11119 |
| 765  | CONTIG161 | 103878 | 105059 | 1.98 | 1.61E-02 | transcription_start_site | + | 105104 | 105104 | -635  | 6776 | AN11119 |
| 765  | CONTIG161 | 103878 | 105059 | 1.98 | 1.61E-02 | transcription_start_site | + | 105663 | 105663 | -1194 | 6777 | AN11119 |
| 765  | CONTIG161 | 103878 | 105059 | 1.98 | 1.61E-02 | transcription_start_site | + | 106029 | 106029 | -1560 | 6778 | AN11119 |
| 765  | CONTIG161 | 103878 | 105059 | 1.98 | 1.61E-02 | transcription_start_site | + | 106383 | 106383 | -1914 | 6779 | AN11119 |
| 765  | CONTIG161 | 103878 | 105059 | 1.98 | 1.61E-02 | transcription_start_site | + | 107486 | 107486 | -3017 | 6781 | AN11120 |
| 765  | CONTIG161 | 103878 | 105059 | 1.98 | 1.61E-02 | transcription_start_site | + | 107970 | 107970 | -3501 | 6782 | AN11120 |
| 765  | CONTIG161 | 103878 | 105059 | 1.98 | 1.61E-02 | transcription_start_site | + | 108409 | 108409 | -3940 | 6783 | AN11120 |
| 49   | CONTIG161 | 121651 | 122010 | 3.24 | 8.43E-04 | transcription_start_site | + | 120909 | 120909 | 921   | 6787 | AN11122 |
| 989  | CONTIG162 | 56103  | 56387  | 1.73 | 1.54E-02 | transcription_start_site | + | 59846  | 59846  | -3601 | 6794 | AN11126 |
| 989  | CONTIG162 | 56103  | 56387  | 1.73 | 1.54E-02 | transcription_start_site | + | 60749  | 60749  | -4504 | 6795 | AN11126 |
| 989  | CONTIG162 | 56103  | 56387  | 1.73 | 1.54E-02 | transcription_start_site | + | 61190  | 61190  | -4945 | 6796 | AN11126 |

|      |           |        |        |      |          |                          |   |        |        |       |      |         |
|------|-----------|--------|--------|------|----------|--------------------------|---|--------|--------|-------|------|---------|
| 1728 | CONTIG163 | 42165  | 42602  | 1.11 | 5.38E-03 | transcription_start_site | - | 38577  | 38577  | -3806 | 6800 | AN11129 |
| 1728 | CONTIG163 | 42165  | 42602  | 1.11 | 5.38E-03 | transcription_start_site | - | 37758  | 37758  | -4625 | 6801 | AN11129 |
| 1485 | CONTIG163 | 88146  | 88498  | 1.28 | 6.24E-03 | transcription_start_site | - | 85608  | 85608  | -2714 | 6805 | AN11130 |
| 1485 | CONTIG163 | 88146  | 88498  | 1.28 | 6.24E-03 | transcription_start_site | - | 85359  | 85359  | -2963 | 6806 | AN11130 |
| 1485 | CONTIG163 | 88146  | 88498  | 1.28 | 6.24E-03 | transcription_start_site | - | 88129  | 88129  | -193  | 6807 | AN11131 |
| 1485 | CONTIG163 | 88146  | 88498  | 1.28 | 6.24E-03 | transcription_start_site | - | 88040  | 88040  | -282  | 6808 | AN11131 |
| 1485 | CONTIG163 | 88146  | 88498  | 1.28 | 6.24E-03 | transcription_start_site | - | 87947  | 87947  | -375  | 6809 | AN11131 |
| 1485 | CONTIG163 | 88146  | 88498  | 1.28 | 6.24E-03 | transcription_start_site | - | 87753  | 87753  | -569  | 6810 | AN11131 |
| 2338 | CONTIG163 | 35270  | 35609  | 0.6  | 1.76E-01 | transcription_start_site | + | 37263  | 37263  | -1823 | 6814 | AN11134 |
| 2338 | CONTIG163 | 35270  | 35609  | 0.6  | 1.76E-01 | transcription_start_site | + | 38760  | 38760  | -3320 | 6815 | AN11135 |
| 2338 | CONTIG163 | 35270  | 35609  | 0.6  | 1.76E-01 | transcription_start_site | + | 38872  | 38872  | -3432 | 6816 | AN11135 |
| 1630 | CONTIG163 | 78770  | 79272  | 1.18 | 9.96E-03 | transcription_start_site | - | 73836  | 73836  | -5185 | 6819 | AN11137 |
| 2140 | CONTIG163 | 20195  | 20454  | 0.84 | 5.36E-02 | transcription_start_site | - | 15511  | 15511  | -4813 | 6821 | AN11138 |
| 1502 | CONTIG164 | 57605  | 58104  | 1.27 | 4.20E-02 | transcription_start_site | + | 61565  | 61565  | -3710 | 6830 | AN11141 |
| 1502 | CONTIG164 | 57605  | 58104  | 1.27 | 4.20E-02 | transcription_start_site | + | 61827  | 61827  | -3972 | 6831 | AN11141 |
| 2027 | CONTIG164 | 60990  | 61277  | 0.93 | 1.38E-01 | transcription_start_site | + | 61565  | 61565  | -431  | 6830 | AN11141 |
| 2027 | CONTIG164 | 60990  | 61277  | 0.93 | 1.38E-01 | transcription_start_site | + | 61827  | 61827  | -693  | 6831 | AN11141 |
| 1132 | CONTIG164 | 90007  | 90281  | 1.58 | 1.37E-02 | transcription_start_site | - | 88938  | 88938  | -1206 | 6832 | AN11142 |
| 1132 | CONTIG164 | 90007  | 90281  | 1.58 | 1.37E-02 | transcription_start_site | - | 88692  | 88692  | -1452 | 6833 | AN11142 |
| 1132 | CONTIG164 | 90007  | 90281  | 1.58 | 1.37E-02 | transcription_start_site | - | 88200  | 88200  | -1944 | 6834 | AN11142 |
| 1132 | CONTIG164 | 90007  | 90281  | 1.58 | 1.37E-02 | transcription_start_site | - | 87767  | 87767  | -2377 | 6835 | AN11142 |
| 1503 | CONTIG164 | 91292  | 91701  | 1.27 | 4.20E-02 | transcription_start_site | - | 88938  | 88938  | -2558 | 6832 | AN11142 |
| 1503 | CONTIG164 | 91292  | 91701  | 1.27 | 4.20E-02 | transcription_start_site | - | 88692  | 88692  | -2804 | 6833 | AN11142 |
| 1503 | CONTIG164 | 91292  | 91701  | 1.27 | 4.20E-02 | transcription_start_site | - | 88200  | 88200  | -3296 | 6834 | AN11142 |
| 1503 | CONTIG164 | 91292  | 91701  | 1.27 | 4.20E-02 | transcription_start_site | - | 87767  | 87767  | -3729 | 6835 | AN11142 |
| 1296 | CONTIG164 | 104943 | 105596 | 1.44 | 1.06E-02 | transcription_start_site | + | 107189 | 107189 | -1919 | 6836 | AN11143 |
| 1296 | CONTIG164 | 104943 | 105596 | 1.44 | 1.06E-02 | transcription_start_site | + | 107489 | 107489 | -2219 | 6837 | AN11143 |
| 1296 | CONTIG164 | 104943 | 105596 | 1.44 | 1.06E-02 | transcription_start_site | + | 107823 | 107823 | -2553 | 6838 | AN11143 |
| 1296 | CONTIG164 | 104943 | 105596 | 1.44 | 1.06E-02 | transcription_start_site | + | 107969 | 107969 | -2699 | 6839 | AN11143 |
| 1296 | CONTIG164 | 104943 | 105596 | 1.44 | 1.06E-02 | transcription_start_site | + | 108664 | 108664 | -3394 | 6840 | AN11143 |
| 247  | CONTIG164 | 48230  | 48659  | 2.71 | 0.00E+00 | transcription_start_site | + | 52506  | 52506  | -4061 | 6841 | AN11144 |
| 247  | CONTIG164 | 48230  | 48659  | 2.71 | 0.00E+00 | transcription_start_site | + | 53497  | 53497  | -5052 | 6842 | AN11144 |
| 1039 | CONTIG164 | 43295  | 43635  | 1.68 | 9.96E-03 | transcription_start_site | + | 42511  | 42511  | 954   | 6845 | AN11145 |
| 1039 | CONTIG164 | 43295  | 43635  | 1.68 | 9.96E-03 | transcription_start_site | + | 42295  | 42295  | 1170  | 6844 | AN11145 |
| 1551 | CONTIG164 | 41869  | 42818  | 1.23 | 1.35E-02 | transcription_start_site | + | 42295  | 42295  | 48    | 6844 | AN11145 |
| 1551 | CONTIG164 | 41869  | 42818  | 1.23 | 1.35E-02 | transcription_start_site | + | 42511  | 42511  | -167  | 6845 | AN11145 |
| 1551 | CONTIG164 | 41869  | 42818  | 1.23 | 1.35E-02 | transcription_start_site | + | 42157  | 42157  | 186   | 6843 | AN11145 |
| 1604 | CONTIG164 | 39687  | 40030  | 1.2  | 5.36E-02 | transcription_start_site | + | 42157  | 42157  | -2298 | 6843 | AN11145 |
| 1604 | CONTIG164 | 39687  | 40030  | 1.2  | 5.36E-02 | transcription_start_site | + | 42295  | 42295  | -2436 | 6844 | AN11145 |
| 1604 | CONTIG164 | 39687  | 40030  | 1.2  | 5.36E-02 | transcription_start_site | + | 42511  | 42511  | -2652 | 6845 | AN11145 |
| 2087 | CONTIG164 | 40142  | 40716  | 0.89 | 1.54E-01 | transcription_start_site | + | 42157  | 42157  | -1728 | 6843 | AN11145 |
| 2087 | CONTIG164 | 40142  | 40716  | 0.89 | 1.54E-01 | transcription_start_site | + | 42295  | 42295  | -1866 | 6844 | AN11145 |
| 2087 | CONTIG164 | 40142  | 40716  | 0.89 | 1.54E-01 | transcription_start_site | + | 42511  | 42511  | -2082 | 6845 | AN11145 |
| 1039 | CONTIG164 | 43295  | 43635  | 1.68 | 9.96E-03 | transcription_start_site | - | 40142  | 40142  | -3323 | 6846 | AN11146 |
| 1039 | CONTIG164 | 43295  | 43635  | 1.68 | 9.96E-03 | transcription_start_site | - | 39991  | 39991  | -3474 | 6847 | AN11146 |
| 1039 | CONTIG164 | 43295  | 43635  | 1.68 | 9.96E-03 | transcription_start_site | - | 39754  | 39754  | -3711 | 6848 | AN11146 |
| 1039 | CONTIG164 | 43295  | 43635  | 1.68 | 9.96E-03 | transcription_start_site | - | 39576  | 39576  | -3889 | 6849 | AN11146 |
| 1039 | CONTIG164 | 43295  | 43635  | 1.68 | 9.96E-03 | transcription_start_site | - | 39402  | 39402  | -4063 | 6850 | AN11146 |
| 1551 | CONTIG164 | 41869  | 42818  | 1.23 | 1.35E-02 | transcription_start_site | - | 40142  | 40142  | -2201 | 6846 | AN11146 |
| 1551 | CONTIG164 | 41869  | 42818  | 1.23 | 1.35E-02 | transcription_start_site | - | 39991  | 39991  | -2352 | 6847 | AN11146 |
| 1551 | CONTIG164 | 41869  | 42818  | 1.23 | 1.35E-02 | transcription_start_site | - | 39754  | 39754  | -2589 | 6848 | AN11146 |
| 1551 | CONTIG164 | 41869  | 42818  | 1.23 | 1.35E-02 | transcription_start_site | - | 39576  | 39576  | -2767 | 6849 | AN11146 |
| 1551 | CONTIG164 | 41869  | 42818  | 1.23 | 1.35E-02 | transcription_start_site | - | 39402  | 39402  | -2941 | 6850 | AN11146 |
| 1604 | CONTIG164 | 39687  | 40030  | 1.2  | 5.36E-02 | transcription_start_site | - | 39754  | 39754  | -104  | 6848 | AN11146 |
| 1604 | CONTIG164 | 39687  | 40030  | 1.2  | 5.36E-02 | transcription_start_site | - | 39991  | 39991  | 132   | 6847 | AN11146 |
| 1604 | CONTIG164 | 39687  | 40030  | 1.2  | 5.36E-02 | transcription_start_site | - | 39576  | 39576  | -282  | 6849 | AN11146 |
| 1604 | CONTIG164 | 39687  | 40030  | 1.2  | 5.36E-02 | transcription_start_site | - | 40142  | 40142  | 283   | 6846 | AN11146 |

|      |           |        |        |      |          |                          |   |        |        |       |      |         |
|------|-----------|--------|--------|------|----------|--------------------------|---|--------|--------|-------|------|---------|
| 1604 | CONTIG164 | 39687  | 40030  | 1.2  | 5.36E-02 | transcription_start_site | - | 39402  | 39402  | -456  | 6850 | AN11146 |
| 2087 | CONTIG164 | 40142  | 40716  | 0.89 | 1.54E-01 | transcription_start_site | - | 40142  | 40142  | -287  | 6846 | AN11146 |
| 2087 | CONTIG164 | 40142  | 40716  | 0.89 | 1.54E-01 | transcription_start_site | - | 39991  | 39991  | -438  | 6847 | AN11146 |
| 2087 | CONTIG164 | 40142  | 40716  | 0.89 | 1.54E-01 | transcription_start_site | - | 39754  | 39754  | -675  | 6848 | AN11146 |
| 2087 | CONTIG164 | 40142  | 40716  | 0.89 | 1.54E-01 | transcription_start_site | - | 39576  | 39576  | -853  | 6849 | AN11146 |
| 2087 | CONTIG164 | 40142  | 40716  | 0.89 | 1.54E-01 | transcription_start_site | - | 39402  | 39402  | -1027 | 6850 | AN11146 |
| 1296 | CONTIG164 | 104943 | 105596 | 1.44 | 1.06E-02 | transcription_start_site | + | 109717 | 109717 | -4447 | 6853 | AN11149 |
| 1296 | CONTIG164 | 104943 | 105596 | 1.44 | 1.06E-02 | transcription_start_site | + | 110042 | 110042 | -4772 | 6854 | AN11149 |
| 1296 | CONTIG164 | 104943 | 105596 | 1.44 | 1.06E-02 | transcription_start_site | + | 110560 | 110560 | -5290 | 6855 | AN11149 |
| 1132 | CONTIG164 | 90007  | 90281  | 1.58 | 1.37E-02 | transcription_start_site | - | 86817  | 86817  | -3327 | 6864 | AN11150 |
| 1132 | CONTIG164 | 90007  | 90281  | 1.58 | 1.37E-02 | transcription_start_site | - | 86535  | 86535  | -3609 | 6865 | AN11150 |
| 1503 | CONTIG164 | 91292  | 91701  | 1.27 | 4.20E-02 | transcription_start_site | - | 86817  | 86817  | -4679 | 6864 | AN11150 |
| 1503 | CONTIG164 | 91292  | 91701  | 1.27 | 4.20E-02 | transcription_start_site | - | 86535  | 86535  | -4961 | 6865 | AN11150 |
| 706  | CONTIG165 | 50180  | 50604  | 2.04 | 7.63E-04 | transcription_start_site | - | 49773  | 49773  | -619  | 6866 | AN11151 |
| 706  | CONTIG165 | 50180  | 50604  | 2.04 | 7.63E-04 | transcription_start_site | - | 48975  | 48975  | -1417 | 6867 | AN11151 |
| 2113 | CONTIG165 | 50645  | 51204  | 0.87 | 1.38E-01 | transcription_start_site | - | 49773  | 49773  | -1151 | 6866 | AN11151 |
| 2113 | CONTIG165 | 50645  | 51204  | 0.87 | 1.38E-01 | transcription_start_site | - | 48975  | 48975  | -1949 | 6867 | AN11151 |
| 288  | CONTIG165 | 94355  | 94719  | 2.65 | 0.00E+00 | transcription_start_site | + | 98030  | 98030  | -3493 | 6868 | AN11152 |
| 288  | CONTIG165 | 94355  | 94719  | 2.65 | 0.00E+00 | transcription_start_site | + | 98155  | 98155  | -3618 | 6869 | AN11152 |
| 288  | CONTIG165 | 94355  | 94719  | 2.65 | 0.00E+00 | transcription_start_site | + | 98239  | 98239  | -3702 | 6870 | AN11152 |
| 288  | CONTIG165 | 94355  | 94719  | 2.65 | 0.00E+00 | transcription_start_site | + | 98308  | 98308  | -3771 | 6871 | AN11152 |
| 288  | CONTIG165 | 94355  | 94719  | 2.65 | 0.00E+00 | transcription_start_site | + | 99142  | 99142  | -4605 | 6872 | AN11152 |
| 1273 | CONTIG165 | 95936  | 97195  | 1.46 | 7.02E-03 | transcription_start_site | + | 98030  | 98030  | -1464 | 6868 | AN11152 |
| 1273 | CONTIG165 | 95936  | 97195  | 1.46 | 7.02E-03 | transcription_start_site | + | 98155  | 98155  | -1589 | 6869 | AN11152 |
| 1273 | CONTIG165 | 95936  | 97195  | 1.46 | 7.02E-03 | transcription_start_site | + | 98239  | 98239  | -1673 | 6870 | AN11152 |
| 1273 | CONTIG165 | 95936  | 97195  | 1.46 | 7.02E-03 | transcription_start_site | + | 98308  | 98308  | -1742 | 6871 | AN11152 |
| 1273 | CONTIG165 | 95936  | 97195  | 1.46 | 7.02E-03 | transcription_start_site | + | 99142  | 99142  | -2576 | 6872 | AN11152 |
| 706  | CONTIG165 | 50180  | 50604  | 2.04 | 7.63E-04 | transcription_start_site | - | 47922  | 47922  | -2470 | 6873 | AN11153 |
| 706  | CONTIG165 | 50180  | 50604  | 2.04 | 7.63E-04 | transcription_start_site | - | 47683  | 47683  | -2709 | 6874 | AN11153 |
| 706  | CONTIG165 | 50180  | 50604  | 2.04 | 7.63E-04 | transcription_start_site | - | 47514  | 47514  | -2878 | 6875 | AN11153 |
| 706  | CONTIG165 | 50180  | 50604  | 2.04 | 7.63E-04 | transcription_start_site | - | 47309  | 47309  | -3083 | 6876 | AN11153 |
| 706  | CONTIG165 | 50180  | 50604  | 2.04 | 7.63E-04 | transcription_start_site | - | 46571  | 46571  | -3821 | 6877 | AN11153 |
| 706  | CONTIG165 | 50180  | 50604  | 2.04 | 7.63E-04 | transcription_start_site | - | 46338  | 46338  | -4054 | 6878 | AN11153 |
| 2113 | CONTIG165 | 50645  | 51204  | 0.87 | 1.38E-01 | transcription_start_site | - | 47922  | 47922  | -3002 | 6873 | AN11153 |
| 2113 | CONTIG165 | 50645  | 51204  | 0.87 | 1.38E-01 | transcription_start_site | - | 47683  | 47683  | -3241 | 6874 | AN11153 |
| 2113 | CONTIG165 | 50645  | 51204  | 0.87 | 1.38E-01 | transcription_start_site | - | 47514  | 47514  | -3410 | 6875 | AN11153 |
| 2113 | CONTIG165 | 50645  | 51204  | 0.87 | 1.38E-01 | transcription_start_site | - | 47309  | 47309  | -3615 | 6876 | AN11153 |
| 2113 | CONTIG165 | 50645  | 51204  | 0.87 | 1.38E-01 | transcription_start_site | - | 46571  | 46571  | -4353 | 6877 | AN11153 |
| 2113 | CONTIG165 | 50645  | 51204  | 0.87 | 1.38E-01 | transcription_start_site | - | 46338  | 46338  | -4586 | 6878 | AN11153 |
| 706  | CONTIG165 | 50180  | 50604  | 2.04 | 7.63E-04 | transcription_start_site | - | 45745  | 45745  | -4647 | 6879 | AN11154 |
| 706  | CONTIG165 | 50180  | 50604  | 2.04 | 7.63E-04 | transcription_start_site | - | 45379  | 45379  | -5013 | 6880 | AN11154 |
| 2113 | CONTIG165 | 50645  | 51204  | 0.87 | 1.38E-01 | transcription_start_site | - | 45745  | 45745  | -5179 | 6879 | AN11154 |
| 288  | CONTIG165 | 94355  | 94719  | 2.65 | 0.00E+00 | transcription_start_site | + | 97367  | 97367  | -2830 | 6881 | AN11155 |
| 288  | CONTIG165 | 94355  | 94719  | 2.65 | 0.00E+00 | transcription_start_site | + | 97502  | 97502  | -2965 | 6882 | AN11155 |
| 1273 | CONTIG165 | 95936  | 97195  | 1.46 | 7.02E-03 | transcription_start_site | + | 97367  | 97367  | -801  | 6881 | AN11155 |
| 1273 | CONTIG165 | 95936  | 97195  | 1.46 | 7.02E-03 | transcription_start_site | + | 97502  | 97502  | -936  | 6882 | AN11155 |
| 1962 | CONTIG165 | 92190  | 92619  | 0.97 | 9.60E-02 | transcription_start_site | + | 97367  | 97367  | -4962 | 6881 | AN11155 |
| 1962 | CONTIG165 | 92190  | 92619  | 0.97 | 9.60E-02 | transcription_start_site | + | 97502  | 97502  | -5097 | 6882 | AN11155 |
| 382  | CONTIG167 | 12012  | 12351  | 2.48 | 7.08E-03 | transcription_start_site | - | 10890  | 10890  | -1291 | 6883 | AN11156 |
| 382  | CONTIG167 | 12012  | 12351  | 2.48 | 7.08E-03 | transcription_start_site | - | 10713  | 10713  | -1468 | 6884 | AN11156 |
| 382  | CONTIG167 | 12012  | 12351  | 2.48 | 7.08E-03 | transcription_start_site | - | 9473   | 9473   | -2708 | 6885 | AN11157 |
| 382  | CONTIG167 | 12012  | 12351  | 2.48 | 7.08E-03 | transcription_start_site | - | 9303   | 9303   | -2878 | 6886 | AN11157 |
| 1546 | CONTIG167 | 9012   | 9651   | 1.24 | 1.54E-01 | transcription_start_site | - | 9303   | 9303   | -28   | 6886 | AN11157 |
| 1546 | CONTIG167 | 9012   | 9651   | 1.24 | 1.54E-01 | transcription_start_site | - | 9473   | 9473   | 141   | 6885 | AN11157 |
| 138  | CONTIG168 | 121218 | 121575 | 2.98 | 0.00E+00 | transcription_start_site | - | 117956 | 117956 | -3440 | 6887 | AN11158 |
| 138  | CONTIG168 | 121218 | 121575 | 2.98 | 0.00E+00 | transcription_start_site | - | 117644 | 117644 | -3752 | 6888 | AN11158 |
| 138  | CONTIG168 | 121218 | 121575 | 2.98 | 0.00E+00 | transcription_start_site | - | 117253 | 117253 | -4143 | 6889 | AN11158 |

|      |           |        |        |      |          |                          |   |        |        |       |      |         |
|------|-----------|--------|--------|------|----------|--------------------------|---|--------|--------|-------|------|---------|
| 138  | CONTIG168 | 121218 | 121575 | 2.98 | 0.00E+00 | transcription_start_site | - | 116254 | 116254 | -5142 | 6896 | AN11160 |
| 558  | CONTIG169 | 142733 | 143017 | 2.24 | 3.81E-04 | transcription_start_site | - | 139572 | 139572 | -3303 | 6907 | AN11164 |
| 558  | CONTIG169 | 142733 | 143017 | 2.24 | 3.81E-04 | transcription_start_site | - | 138748 | 138748 | -4127 | 6908 | AN11164 |
| 558  | CONTIG169 | 142733 | 143017 | 2.24 | 3.81E-04 | transcription_start_site | - | 138470 | 138470 | -4405 | 6909 | AN11164 |
| 558  | CONTIG169 | 142733 | 143017 | 2.24 | 3.81E-04 | transcription_start_site | - | 138283 | 138283 | -4592 | 6910 | AN11164 |
| 558  | CONTIG169 | 142733 | 143017 | 2.24 | 3.81E-04 | transcription_start_site | - | 137984 | 137984 | -4891 | 6911 | AN11164 |
| 987  | CONTIG169 | 169210 | 169714 | 1.73 | 3.81E-03 | transcription_start_site | + | 170538 | 170538 | -1076 | 6913 | AN11165 |
| 987  | CONTIG169 | 169210 | 169714 | 1.73 | 3.81E-03 | transcription_start_site | + | 170713 | 170713 | -1251 | 6914 | AN11165 |
| 1530 | CONTIG169 | 261166 | 262175 | 1.25 | 9.64E-03 | transcription_start_site | - | 256597 | 256597 | -5073 | 6920 | AN11168 |
| 1530 | CONTIG169 | 261166 | 262175 | 1.25 | 9.64E-03 | transcription_start_site | - | 256405 | 256405 | -5265 | 6921 | AN11168 |
| 678  | CONTIG169 | 289368 | 289853 | 2.07 | 1.44E-03 | transcription_start_site | + | 288464 | 288464 | 1146  | 6926 | AN11169 |
| 956  | CONTIG169 | 284868 | 285282 | 1.76 | 7.08E-03 | transcription_start_site | + | 287184 | 287184 | -2109 | 6922 | AN11169 |
| 956  | CONTIG169 | 284868 | 285282 | 1.76 | 7.08E-03 | transcription_start_site | + | 287474 | 287474 | -2399 | 6923 | AN11169 |
| 956  | CONTIG169 | 284868 | 285282 | 1.76 | 7.08E-03 | transcription_start_site | + | 288041 | 288041 | -2966 | 6924 | AN11169 |
| 956  | CONTIG169 | 284868 | 285282 | 1.76 | 7.08E-03 | transcription_start_site | + | 288241 | 288241 | -3166 | 6925 | AN11169 |
| 956  | CONTIG169 | 284868 | 285282 | 1.76 | 7.08E-03 | transcription_start_site | + | 288464 | 288464 | -3389 | 6926 | AN11169 |
| 1770 | CONTIG169 | 286658 | 287017 | 1.09 | 7.66E-02 | transcription_start_site | + | 287184 | 287184 | -346  | 6922 | AN11169 |
| 1770 | CONTIG169 | 286658 | 287017 | 1.09 | 7.66E-02 | transcription_start_site | + | 287474 | 287474 | -636  | 6923 | AN11169 |
| 1770 | CONTIG169 | 286658 | 287017 | 1.09 | 7.66E-02 | transcription_start_site | + | 288041 | 288041 | -1203 | 6924 | AN11169 |
| 1770 | CONTIG169 | 286658 | 287017 | 1.09 | 7.66E-02 | transcription_start_site | + | 288241 | 288241 | -1403 | 6925 | AN11169 |
| 1770 | CONTIG169 | 286658 | 287017 | 1.09 | 7.66E-02 | transcription_start_site | + | 288464 | 288464 | -1626 | 6926 | AN11169 |
| 987  | CONTIG169 | 169210 | 169714 | 1.73 | 3.81E-03 | transcription_start_site | + | 169509 | 169509 | -47   | 6946 | AN11176 |
| 2213 | CONTIG169 | 271352 | 272076 | 0.78 | 1.57E-01 | transcription_start_site | + | 275369 | 275369 | -3655 | 6950 | AN11179 |
| 1530 | CONTIG169 | 261166 | 262175 | 1.25 | 9.64E-03 | transcription_start_site | - | 260268 | 260268 | -1402 | 6955 | AN11181 |
| 1530 | CONTIG169 | 261166 | 262175 | 1.25 | 9.64E-03 | transcription_start_site | - | 257341 | 257341 | -4329 | 6956 | AN11181 |
| 1530 | CONTIG169 | 261166 | 262175 | 1.25 | 9.64E-03 | transcription_start_site | - | 257246 | 257246 | -4424 | 6957 | AN11181 |
| 1530 | CONTIG169 | 261166 | 262175 | 1.25 | 9.64E-03 | transcription_start_site | - | 256847 | 256847 | -4823 | 6958 | AN11181 |
| 1944 | CONTIG169 | 95716  | 96070  | 0.98 | 1.08E-01 | transcription_start_site | - | 91129  | 91129  | -4764 | 6959 | AN11182 |
| 1944 | CONTIG169 | 95716  | 96070  | 0.98 | 1.08E-01 | transcription_start_site | - | 90826  | 90826  | -5067 | 6960 | AN11182 |
| 678  | CONTIG169 | 289368 | 289853 | 2.07 | 1.44E-03 | transcription_start_site | + | 289688 | 289688 | -77   | 6968 | AN11184 |
| 678  | CONTIG169 | 289368 | 289853 | 2.07 | 1.44E-03 | transcription_start_site | + | 290448 | 290448 | -837  | 6969 | AN11184 |
| 956  | CONTIG169 | 284868 | 285282 | 1.76 | 7.08E-03 | transcription_start_site | + | 289688 | 289688 | -4613 | 6968 | AN11184 |
| 1770 | CONTIG169 | 286658 | 287017 | 1.09 | 7.66E-02 | transcription_start_site | + | 289688 | 289688 | -2850 | 6968 | AN11184 |
| 1770 | CONTIG169 | 286658 | 287017 | 1.09 | 7.66E-02 | transcription_start_site | + | 290448 | 290448 | -3610 | 6969 | AN11184 |
| 678  | CONTIG169 | 289368 | 289853 | 2.07 | 1.44E-03 | transcription_start_site | + | 291182 | 291182 | -1571 | 6970 | AN11185 |
| 678  | CONTIG169 | 289368 | 289853 | 2.07 | 1.44E-03 | transcription_start_site | + | 292449 | 292449 | -2838 | 6971 | AN11185 |
| 1770 | CONTIG169 | 286658 | 287017 | 1.09 | 7.66E-02 | transcription_start_site | + | 291182 | 291182 | -4344 | 6970 | AN11185 |
| 1386 | CONTIG169 | 326716 | 327125 | 1.36 | 3.01E-02 | transcription_start_site | - | 327655 | 327655 | 734   | 6980 | AN11187 |
| 564  | CONTIG170 | 168017 | 168351 | 2.23 | 0.00E+00 | transcription_start_site | - | 166416 | 166416 | -1768 | 7001 | AN11192 |
| 564  | CONTIG170 | 168017 | 168351 | 2.23 | 0.00E+00 | transcription_start_site | - | 166182 | 166182 | -2002 | 7002 | AN11192 |
| 564  | CONTIG170 | 168017 | 168351 | 2.23 | 0.00E+00 | transcription_start_site | - | 165307 | 165307 | -2877 | 7003 | AN11192 |
| 564  | CONTIG170 | 168017 | 168351 | 2.23 | 0.00E+00 | transcription_start_site | - | 165164 | 165164 | -3020 | 7004 | AN11192 |
| 955  | CONTIG170 | 35494  | 35768  | 1.76 | 4.01E-03 | transcription_start_site | + | 39976  | 39976  | -4345 | 7010 | AN11195 |
| 564  | CONTIG170 | 168017 | 168351 | 2.23 | 0.00E+00 | transcription_start_site | - | 167440 | 167440 | -744  | 7025 | AN11200 |
| 564  | CONTIG170 | 168017 | 168351 | 2.23 | 0.00E+00 | transcription_start_site | - | 167331 | 167331 | -853  | 7026 | AN11200 |
| 317  | CONTIG172 | 427144 | 427408 | 2.59 | 0.00E+00 | transcription_start_site | - | 425129 | 425129 | -2147 | 7073 | AN11213 |
| 317  | CONTIG172 | 427144 | 427408 | 2.59 | 0.00E+00 | transcription_start_site | - | 424888 | 424888 | -2388 | 7074 | AN11213 |
| 2190 | CONTIG172 | 428404 | 429053 | 0.8  | 9.90E-02 | transcription_start_site | - | 425129 | 425129 | -3599 | 7073 | AN11213 |
| 2190 | CONTIG172 | 428404 | 429053 | 0.8  | 9.90E-02 | transcription_start_site | - | 424888 | 424888 | -3840 | 7074 | AN11213 |
| 317  | CONTIG172 | 427144 | 427408 | 2.59 | 0.00E+00 | transcription_start_site | - | 425775 | 425775 | -1501 | 7078 | AN11216 |
| 317  | CONTIG172 | 427144 | 427408 | 2.59 | 0.00E+00 | transcription_start_site | - | 425599 | 425599 | -1677 | 7079 | AN11216 |
| 2190 | CONTIG172 | 428404 | 429053 | 0.8  | 9.90E-02 | transcription_start_site | - | 425775 | 425775 | -2953 | 7078 | AN11216 |
| 2190 | CONTIG172 | 428404 | 429053 | 0.8  | 9.90E-02 | transcription_start_site | - | 425599 | 425599 | -3129 | 7079 | AN11216 |
| 2367 | CONTIG174 | 23554  | 24282  | 0.45 | 1.15E-01 | transcription_start_site | - | 18788  | 18788  | -5130 | 7108 | AN11224 |
| 2367 | CONTIG174 | 23554  | 24282  | 0.45 | 1.15E-01 | transcription_start_site | - | 18673  | 18673  | -5245 | 7109 | AN11224 |
| 2361 | CONTIG174 | 16521  | 17620  | 0.49 | 8.54E-02 | transcription_start_site | - | 17017  | 17017  | -53   | 7110 | AN11225 |
| 2361 | CONTIG174 | 16521  | 17620  | 0.49 | 8.54E-02 | transcription_start_site | - | 14645  | 14645  | -2425 | 7111 | AN11226 |

|      |           |        |        |      |          |                          |   |        |        |       |      |         |
|------|-----------|--------|--------|------|----------|--------------------------|---|--------|--------|-------|------|---------|
| 2361 | CONTIG174 | 16521  | 17620  | 0.49 | 8.54E-02 | transcription_start_site | - | 14584  | 14584  | -2486 | 7112 | AN11226 |
| 2361 | CONTIG174 | 16521  | 17620  | 0.49 | 8.54E-02 | transcription_start_site | - | 14445  | 14445  | -2625 | 7113 | AN11226 |
| 2361 | CONTIG174 | 16521  | 17620  | 0.49 | 8.54E-02 | transcription_start_site | - | 14192  | 14192  | -2878 | 7114 | AN11226 |
| 2361 | CONTIG174 | 16521  | 17620  | 0.49 | 8.54E-02 | transcription_start_site | - | 13890  | 13890  | -3180 | 7115 | AN11226 |
| 2274 | CONTIG175 | 18153  | 18502  | 0.7  | 6.50E-02 | transcription_start_site | + | 18281  | 18281  | 46    | 7116 | AN11227 |
| 2274 | CONTIG175 | 18153  | 18502  | 0.7  | 6.50E-02 | transcription_start_site | + | 18376  | 18376  | -48   | 7117 | AN11227 |
| 2274 | CONTIG175 | 18153  | 18502  | 0.7  | 6.50E-02 | transcription_start_site | + | 18479  | 18479  | -151  | 7118 | AN11227 |
| 2274 | CONTIG175 | 18153  | 18502  | 0.7  | 6.50E-02 | transcription_start_site | + | 18655  | 18655  | -327  | 7119 | AN11227 |
| 2274 | CONTIG175 | 18153  | 18502  | 0.7  | 6.50E-02 | transcription_start_site | + | 18873  | 18873  | -545  | 7120 | AN11227 |
| 2274 | CONTIG175 | 18153  | 18502  | 0.7  | 6.50E-02 | transcription_start_site | + | 19169  | 19169  | -841  | 7121 | AN11227 |
| 2274 | CONTIG175 | 18153  | 18502  | 0.7  | 6.50E-02 | transcription_start_site | + | 19292  | 19292  | -964  | 7122 | AN11227 |
| 2339 | CONTIG175 | 15381  | 15803  | 0.6  | 1.76E-01 | transcription_start_site | + | 18281  | 18281  | -2689 | 7116 | AN11227 |
| 2339 | CONTIG175 | 15381  | 15803  | 0.6  | 1.76E-01 | transcription_start_site | + | 18376  | 18376  | -2784 | 7117 | AN11227 |
| 2339 | CONTIG175 | 15381  | 15803  | 0.6  | 1.76E-01 | transcription_start_site | + | 18479  | 18479  | -2887 | 7118 | AN11227 |
| 2339 | CONTIG175 | 15381  | 15803  | 0.6  | 1.76E-01 | transcription_start_site | + | 18655  | 18655  | -3063 | 7119 | AN11227 |
| 2339 | CONTIG175 | 15381  | 15803  | 0.6  | 1.76E-01 | transcription_start_site | + | 18873  | 18873  | -3281 | 7120 | AN11227 |
| 2339 | CONTIG175 | 15381  | 15803  | 0.6  | 1.76E-01 | transcription_start_site | + | 19169  | 19169  | -3577 | 7121 | AN11227 |
| 2339 | CONTIG175 | 15381  | 15803  | 0.6  | 1.76E-01 | transcription_start_site | + | 19292  | 19292  | -3700 | 7122 | AN11227 |
| 659  | CONTIG16  | 249767 | 250036 | 2.1  | 1.06E-02 | transcription_start_site | - | 246356 | 246356 | -3545 | 7131 | AN1123  |
| 659  | CONTIG16  | 249767 | 250036 | 2.1  | 1.06E-02 | transcription_start_site | - | 246268 | 246268 | -3633 | 7132 | AN1123  |
| 659  | CONTIG16  | 249767 | 250036 | 2.1  | 1.06E-02 | transcription_start_site | - | 246099 | 246099 | -3802 | 7133 | AN1123  |
| 659  | CONTIG16  | 249767 | 250036 | 2.1  | 1.06E-02 | transcription_start_site | - | 245962 | 245962 | -3939 | 7134 | AN1123  |
| 659  | CONTIG16  | 249767 | 250036 | 2.1  | 1.06E-02 | transcription_start_site | - | 245481 | 245481 | -4420 | 7135 | AN1123  |
| 659  | CONTIG16  | 249767 | 250036 | 2.1  | 1.06E-02 | transcription_start_site | - | 245304 | 245304 | -4597 | 7136 | AN1123  |
| 2357 | CONTIG183 | 5776   | 7325   | 0.5  | 1.75E-02 | transcription_start_site | + | 6449   | 6449   | 101   | 7145 | AN11232 |
| 2357 | CONTIG183 | 5776   | 7325   | 0.5  | 1.75E-02 | transcription_start_site | + | 6012   | 6012   | 538   | 7144 | AN11232 |
| 2357 | CONTIG183 | 5776   | 7325   | 0.5  | 1.75E-02 | transcription_start_site | + | 8213   | 8213   | -1662 | 7146 | AN11233 |
| 2357 | CONTIG183 | 5776   | 7325   | 0.5  | 1.75E-02 | transcription_start_site | + | 8353   | 8353   | -1802 | 7147 | AN11233 |
| 2357 | CONTIG183 | 5776   | 7325   | 0.5  | 1.75E-02 | transcription_start_site | + | 9301   | 9301   | -2750 | 7148 | AN11233 |
| 2357 | CONTIG183 | 5776   | 7325   | 0.5  | 1.75E-02 | transcription_start_site | + | 9793   | 9793   | -3242 | 7149 | AN11233 |
| 2357 | CONTIG183 | 5776   | 7325   | 0.5  | 1.75E-02 | transcription_start_site | + | 9925   | 9925   | -3374 | 7150 | AN11233 |
| 220  | CONTIG186 | 2026   | 2315   | 2.79 | 1.25E-02 | transcription_start_site | + | 1370   | 1370   | 800   | 7153 | AN11234 |
| 220  | CONTIG186 | 2026   | 2315   | 2.79 | 1.25E-02 | transcription_start_site | + | 1235   | 1235   | 935   | 7152 | AN11234 |
| 220  | CONTIG186 | 2026   | 2315   | 2.79 | 1.25E-02 | transcription_start_site | + | 1167   | 1167   | 1003  | 7151 | AN11234 |
| 1826 | CONTIG188 | 8855   | 10044  | 1.05 | 2.05E-02 | transcription_start_site | - | 6614   | 6614   | -2835 | 7154 | AN11235 |
| 2322 | CONTIG188 | 6679   | 7410   | 0.63 | 8.32E-02 | transcription_start_site | - | 6614   | 6614   | -430  | 7154 | AN11235 |
| 2330 | CONTIG188 | 3921   | 5615   | 0.61 | 5.91E-02 | transcription_start_site | - | 6614   | 6614   | 1846  | 7154 | AN11235 |
| 1826 | CONTIG188 | 8855   | 10044  | 1.05 | 2.05E-02 | transcription_start_site | - | 9521   | 9521   | 71    | 7156 | AN11237 |
| 1826 | CONTIG188 | 8855   | 10044  | 1.05 | 2.05E-02 | transcription_start_site | - | 9729   | 9729   | 279   | 7155 | AN11237 |
| 2180 | CONTIG191 | 1071   | 1417   | 0.81 | 6.04E-02 | transcription_start_site | - | 1133   | 1133   | -111  | 7158 | AN11238 |
| 2180 | CONTIG191 | 1071   | 1417   | 0.81 | 6.04E-02 | transcription_start_site | - | 1379   | 1379   | 135   | 7157 | AN11238 |
| 659  | CONTIG16  | 249767 | 250036 | 2.1  | 1.06E-02 | transcription_start_site | + | 249363 | 249363 | 538   | 7166 | AN1124  |
| 659  | CONTIG16  | 249767 | 250036 | 2.1  | 1.06E-02 | transcription_start_site | + | 249198 | 249198 | 703   | 7165 | AN1124  |
| 659  | CONTIG16  | 249767 | 250036 | 2.1  | 1.06E-02 | transcription_start_site | + | 248771 | 248771 | 1130  | 7164 | AN1124  |
| 1147 | CONTIG197 | 386    | 970    | 1.57 | 7.36E-03 | transcription_start_site | + | 1083   | 1083   | -405  | 7167 | AN11240 |
| 1732 | CONTIG197 | 6982   | 7641   | 1.11 | 4.73E-02 | transcription_start_site | + | 7348   | 7348   | -36   | 7168 | AN11241 |
| 1732 | CONTIG197 | 6982   | 7641   | 1.11 | 4.73E-02 | transcription_start_site | + | 6452   | 6452   | 859   | 7170 | AN11242 |
| 1732 | CONTIG197 | 6982   | 7641   | 1.11 | 4.73E-02 | transcription_start_site | + | 6043   | 6043   | 1268  | 7169 | AN11242 |
| 2120 | CONTIG209 | 3919   | 4793   | 0.86 | 3.01E-02 | transcription_start_site | + | 4689   | 4689   | -333  | 7179 | AN11246 |
| 2266 | CONTIG209 | 681    | 1036   | 0.71 | 6.74E-02 | transcription_start_site | + | 4689   | 4689   | -3830 | 7179 | AN11246 |
| 2335 | CONTIG209 | 3171   | 3733   | 0.6  | 1.22E-01 | transcription_start_site | + | 4689   | 4689   | -1237 | 7179 | AN11246 |
| 659  | CONTIG16  | 249767 | 250036 | 2.1  | 1.06E-02 | transcription_start_site | - | 249896 | 249896 | -5    | 7184 | AN1125  |
| 659  | CONTIG16  | 249767 | 250036 | 2.1  | 1.06E-02 | transcription_start_site | - | 250113 | 250113 | 211   | 7183 | AN1125  |
| 1571 | CONTIG16  | 253810 | 254156 | 1.22 | 7.38E-02 | transcription_start_site | - | 250113 | 250113 | -3870 | 7183 | AN1125  |
| 1571 | CONTIG16  | 253810 | 254156 | 1.22 | 7.38E-02 | transcription_start_site | - | 249896 | 249896 | -4087 | 7184 | AN1125  |
| 2283 | CONTIG237 | 1366   | 1700   | 0.69 | 9.60E-02 | transcription_start_site | + | 1681   | 1681   | -148  | 7185 | AN11250 |
| 1233 | CONTIG46  | 23417  | 23761  | 1.5  | 3.01E-02 | transcription_start_site | - | 18624  | 18624  | -4965 | 7186 | AN11251 |

|      |          |        |        |      |          |                          |   |        |        |       |      |         |
|------|----------|--------|--------|------|----------|--------------------------|---|--------|--------|-------|------|---------|
| 1466 | CONTIG84 | 112670 | 112940 | 1.3  | 1.08E-01 | transcription_start_site | + | 114997 | 114997 | -2192 | 7190 | AN11253 |
| 1466 | CONTIG84 | 112670 | 112940 | 1.3  | 1.08E-01 | transcription_start_site | + | 115900 | 115900 | -3095 | 7191 | AN11253 |
| 1286 | CONTIG2  | 74717  | 75966  | 1.45 | 2.49E-03 | transcription_start_site | - | 76104  | 76104  | 762   | 7202 | AN11259 |
| 1286 | CONTIG2  | 74717  | 75966  | 1.45 | 2.49E-03 | transcription_start_site | - | 76160  | 76160  | 818   | 7201 | AN11259 |
| 659  | CONTIG16 | 249767 | 250036 | 2.1  | 1.06E-02 | transcription_start_site | + | 250643 | 250643 | -741  | 7203 | AN1126  |
| 659  | CONTIG16 | 249767 | 250036 | 2.1  | 1.06E-02 | transcription_start_site | + | 250900 | 250900 | -998  | 7204 | AN1126  |
| 659  | CONTIG16 | 249767 | 250036 | 2.1  | 1.06E-02 | transcription_start_site | + | 251201 | 251201 | -1299 | 7205 | AN1126  |
| 659  | CONTIG16 | 249767 | 250036 | 2.1  | 1.06E-02 | transcription_start_site | + | 251319 | 251319 | -1417 | 7206 | AN1126  |
| 1196 | CONTIG5  | 70212  | 71304  | 1.53 | 7.66E-02 | transcription_start_site | + | 69287  | 69287  | 1471  | 7210 | AN11261 |
| 1315 | CONTIG5  | 67507  | 68016  | 1.43 | 5.49E-02 | transcription_start_site | + | 69123  | 69123  | -1361 | 7209 | AN11261 |
| 1315 | CONTIG5  | 67507  | 68016  | 1.43 | 5.49E-02 | transcription_start_site | + | 69287  | 69287  | -1525 | 7210 | AN11261 |
| 518  | CONTIG5  | 102162 | 102501 | 2.29 | 4.22E-03 | transcription_start_site | + | 102294 | 102294 | 37    | 7211 | AN11262 |
| 518  | CONTIG5  | 102162 | 102501 | 2.29 | 4.22E-03 | transcription_start_site | + | 102547 | 102547 | -215  | 7212 | AN11262 |
| 518  | CONTIG5  | 102162 | 102501 | 2.29 | 4.22E-03 | transcription_start_site | + | 102792 | 102792 | -460  | 7213 | AN11262 |
| 1549 | CONTIG5  | 248345 | 248679 | 1.24 | 1.54E-01 | transcription_start_site | - | 249201 | 249201 | 689   | 7220 | AN11265 |
| 791  | CONTIG6  | 32104  | 32528  | 1.95 | 6.24E-03 | transcription_start_site | - | 32398  | 32398  | 82    | 7222 | AN11266 |
| 791  | CONTIG6  | 32104  | 32528  | 1.95 | 6.24E-03 | transcription_start_site | - | 32758  | 32758  | 442   | 7221 | AN11266 |
| 141  | CONTIG6  | 88059  | 88478  | 2.97 | 0.00E+00 | transcription_start_site | + | 92873  | 92873  | -4604 | 7223 | AN11267 |
| 141  | CONTIG6  | 88059  | 88478  | 2.97 | 0.00E+00 | transcription_start_site | + | 93145  | 93145  | -4876 | 7224 | AN11267 |
| 267  | CONTIG6  | 88579  | 89093  | 2.68 | 0.00E+00 | transcription_start_site | + | 92873  | 92873  | -4037 | 7223 | AN11267 |
| 267  | CONTIG6  | 88579  | 89093  | 2.68 | 0.00E+00 | transcription_start_site | + | 93145  | 93145  | -4309 | 7224 | AN11267 |
| 1571 | CONTIG16 | 253810 | 254156 | 1.22 | 7.38E-02 | transcription_start_site | - | 252932 | 252932 | -1051 | 7231 | AN1127  |
| 1571 | CONTIG16 | 253810 | 254156 | 1.22 | 7.38E-02 | transcription_start_site | - | 252862 | 252862 | -1121 | 7232 | AN1127  |
| 2331 | CONTIG7  | 475144 | 475344 | 0.61 | 6.58E-02 | transcription_start_site | + | 475390 | 475390 | -146  | 7236 | AN11271 |
| 2331 | CONTIG7  | 475144 | 475344 | 0.61 | 6.58E-02 | transcription_start_site | + | 475551 | 475551 | -307  | 7237 | AN11271 |
| 2331 | CONTIG7  | 475144 | 475344 | 0.61 | 6.58E-02 | transcription_start_site | + | 475609 | 475609 | -365  | 7238 | AN11271 |
| 1191 | CONTIG7  | 508741 | 509232 | 1.53 | 1.54E-02 | transcription_start_site | + | 513357 | 513357 | -4370 | 7242 | AN11273 |
| 1191 | CONTIG7  | 508741 | 509232 | 1.53 | 1.54E-02 | transcription_start_site | + | 513463 | 513463 | -4476 | 7243 | AN11273 |
| 1191 | CONTIG7  | 508741 | 509232 | 1.53 | 1.54E-02 | transcription_start_site | + | 513654 | 513654 | -4667 | 7244 | AN11273 |
| 1191 | CONTIG7  | 508741 | 509232 | 1.53 | 1.54E-02 | transcription_start_site | + | 514072 | 514072 | -5085 | 7245 | AN11273 |
| 2075 | CONTIG10 | 29401  | 30069  | 0.9  | 1.81E-01 | transcription_start_site | - | 29615  | 29615  | -120  | 7258 | AN11278 |
| 2075 | CONTIG10 | 29401  | 30069  | 0.9  | 1.81E-01 | transcription_start_site | - | 29389  | 29389  | -346  | 7259 | AN11278 |
| 2075 | CONTIG10 | 29401  | 30069  | 0.9  | 1.81E-01 | transcription_start_site | - | 29186  | 29186  | -549  | 7260 | AN11278 |
| 399  | CONTIG10 | 96542  | 96966  | 2.45 | 1.77E-03 | transcription_start_site | + | 96137  | 96137  | 617   | 7262 | AN11279 |
| 399  | CONTIG10 | 96542  | 96966  | 2.45 | 1.77E-03 | transcription_start_site | + | 95789  | 95789  | 965   | 7261 | AN11279 |
| 1220 | CONTIG10 | 95107  | 95753  | 1.51 | 2.07E-02 | transcription_start_site | + | 95789  | 95789  | -359  | 7261 | AN11279 |
| 1220 | CONTIG10 | 95107  | 95753  | 1.51 | 2.07E-02 | transcription_start_site | + | 96137  | 96137  | -707  | 7262 | AN11279 |
| 659  | CONTIG16 | 249767 | 250036 | 2.1  | 1.06E-02 | transcription_start_site | + | 254619 | 254619 | -4717 | 7263 | AN1128  |
| 1571 | CONTIG16 | 253810 | 254156 | 1.22 | 7.38E-02 | transcription_start_site | + | 254619 | 254619 | -636  | 7263 | AN1128  |
| 1023 | CONTIG12 | 45608  | 46027  | 1.7  | 1.37E-02 | transcription_start_site | + | 50677  | 50677  | -4859 | 7264 | AN11280 |
| 1023 | CONTIG12 | 45608  | 46027  | 1.7  | 1.37E-02 | transcription_start_site | + | 50994  | 50994  | -5176 | 7265 | AN11280 |
| 684  | CONTIG14 | 261244 | 261878 | 2.07 | 6.24E-03 | transcription_start_site | - | 257115 | 257115 | -4446 | 7274 | AN11285 |
| 684  | CONTIG14 | 261244 | 261878 | 2.07 | 6.24E-03 | transcription_start_site | - | 256764 | 256764 | -4797 | 7275 | AN11285 |
| 684  | CONTIG14 | 261244 | 261878 | 2.07 | 6.24E-03 | transcription_start_site | - | 256634 | 256634 | -4927 | 7276 | AN11285 |
| 1074 | CONTIG14 | 254943 | 255807 | 1.64 | 1.06E-02 | transcription_start_site | - | 256634 | 256634 | 1259  | 7276 | AN11285 |
| 1074 | CONTIG14 | 254943 | 255807 | 1.64 | 1.06E-02 | transcription_start_site | - | 256764 | 256764 | 1389  | 7275 | AN11285 |
| 626  | CONTIG14 | 344115 | 344465 | 2.15 | 4.57E-03 | transcription_start_site | - | 341574 | 341574 | -2716 | 7277 | AN11286 |
| 626  | CONTIG14 | 344115 | 344465 | 2.15 | 4.57E-03 | transcription_start_site | - | 341468 | 341468 | -2822 | 7278 | AN11286 |
| 1119 | CONTIG15 | 153905 | 155679 | 1.59 | 0.00E+00 | transcription_start_site | + | 154905 | 154905 | -113  | 7282 | AN11288 |
| 1119 | CONTIG15 | 153905 | 155679 | 1.59 | 0.00E+00 | transcription_start_site | + | 155055 | 155055 | -263  | 7283 | AN11288 |
| 1571 | CONTIG16 | 253810 | 254156 | 1.22 | 7.38E-02 | transcription_start_site | + | 258104 | 258104 | -4121 | 7286 | AN1129  |
| 1571 | CONTIG16 | 253810 | 254156 | 1.22 | 7.38E-02 | transcription_start_site | + | 258766 | 258766 | -4783 | 7287 | AN1129  |
| 1571 | CONTIG16 | 253810 | 254156 | 1.22 | 7.38E-02 | transcription_start_site | + | 258919 | 258919 | -4936 | 7288 | AN1129  |
| 4    | CONTIG16 | 24243  | 24517  | 3.63 | 0.00E+00 | transcription_start_site | - | 20986  | 20986  | -3394 | 7292 | AN11291 |
| 4    | CONTIG16 | 24243  | 24517  | 3.63 | 0.00E+00 | transcription_start_site | - | 20869  | 20869  | -3511 | 7293 | AN11291 |
| 181  | CONTIG16 | 23413  | 23917  | 2.88 | 3.81E-04 | transcription_start_site | - | 20986  | 20986  | -2679 | 7292 | AN11291 |
| 181  | CONTIG16 | 23413  | 23917  | 2.88 | 3.81E-04 | transcription_start_site | - | 20869  | 20869  | -2796 | 7293 | AN11291 |



|      |          |        |        |      |          |                          |   |        |        |       |      |         |
|------|----------|--------|--------|------|----------|--------------------------|---|--------|--------|-------|------|---------|
| 696  | CONTIG16 | 22068  | 22932  | 2.05 | 9.75E-04 | transcription_start_site | - | 20986  | 20986  | -1514 | 7292 | AN11291 |
| 696  | CONTIG16 | 22068  | 22932  | 2.05 | 9.75E-04 | transcription_start_site | - | 20869  | 20869  | -1631 | 7293 | AN11291 |
| 538  | CONTIG16 | 179026 | 179395 | 2.27 | 7.08E-03 | transcription_start_site | - | 175282 | 175282 | -3928 | 7301 | AN11294 |
| 538  | CONTIG16 | 179026 | 179395 | 2.27 | 7.08E-03 | transcription_start_site | - | 175194 | 175194 | -4016 | 7302 | AN11294 |
| 631  | CONTIG16 | 193816 | 194225 | 2.14 | 9.96E-03 | transcription_start_site | - | 194590 | 194590 | 569   | 7304 | AN11295 |
| 631  | CONTIG16 | 193816 | 194225 | 2.14 | 9.96E-03 | transcription_start_site | - | 194728 | 194728 | 707   | 7303 | AN11295 |
| 98   | CONTIG22 | 40280  | 40780  | 3.09 | 0.00E+00 | transcription_start_site | + | 42564  | 42564  | -2034 | 7323 | AN11301 |
| 98   | CONTIG22 | 40280  | 40780  | 3.09 | 0.00E+00 | transcription_start_site | + | 43022  | 43022  | -2492 | 7324 | AN11301 |
| 1281 | CONTIG22 | 42245  | 43262  | 1.46 | 3.02E-02 | transcription_start_site | + | 42564  | 42564  | 189   | 7323 | AN11301 |
| 1281 | CONTIG22 | 42245  | 43262  | 1.46 | 3.02E-02 | transcription_start_site | + | 43022  | 43022  | -268  | 7324 | AN11301 |
| 1329 | CONTIG25 | 8631   | 9125   | 1.41 | 1.25E-02 | transcription_start_site | - | 4199   | 4199   | -4679 | 7335 | AN11305 |
| 1329 | CONTIG25 | 8631   | 9125   | 1.41 | 1.25E-02 | transcription_start_site | - | 4100   | 4100   | -4778 | 7336 | AN11305 |
| 1329 | CONTIG25 | 8631   | 9125   | 1.41 | 1.25E-02 | transcription_start_site | - | 3905   | 3905   | -4973 | 7337 | AN11305 |
| 2321 | CONTIG25 | 7071   | 8230   | 0.63 | 6.32E-02 | transcription_start_site | - | 4199   | 4199   | -3451 | 7335 | AN11305 |
| 2321 | CONTIG25 | 7071   | 8230   | 0.63 | 6.32E-02 | transcription_start_site | - | 4100   | 4100   | -3550 | 7336 | AN11305 |
| 2321 | CONTIG25 | 7071   | 8230   | 0.63 | 6.32E-02 | transcription_start_site | - | 3905   | 3905   | -3745 | 7337 | AN11305 |
| 2208 | CONTIG25 | 35180  | 37875  | 0.78 | 0.00E+00 | transcription_start_site | + | 37210  | 37210  | -682  | 7338 | AN11306 |
| 2208 | CONTIG25 | 35180  | 37875  | 0.78 | 0.00E+00 | transcription_start_site | + | 37289  | 37289  | -761  | 7339 | AN11306 |
| 1602 | CONTIG25 | 106954 | 107233 | 1.2  | 3.01E-02 | transcription_start_site | - | 106744 | 106744 | -349  | 7340 | AN11307 |
| 1602 | CONTIG25 | 106954 | 107233 | 1.2  | 3.01E-02 | transcription_start_site | - | 106665 | 106665 | -428  | 7341 | AN11307 |
| 2182 | CONTIG25 | 139729 | 140303 | 0.81 | 1.38E-01 | transcription_start_site | - | 135300 | 135300 | -4716 | 7342 | AN11308 |
| 2182 | CONTIG25 | 139729 | 140303 | 0.81 | 1.38E-01 | transcription_start_site | - | 135029 | 135029 | -4987 | 7343 | AN11308 |
| 582  | CONTIG26 | 181361 | 181775 | 2.21 | 3.17E-03 | transcription_start_site | - | 178398 | 178398 | -3170 | 7352 | AN11311 |
| 582  | CONTIG26 | 181361 | 181775 | 2.21 | 3.17E-03 | transcription_start_site | - | 178017 | 178017 | -3551 | 7353 | AN11311 |
| 1704 | CONTIG27 | 40667  | 41016  | 1.13 | 3.34E-02 | transcription_start_site | + | 45087  | 45087  | -4245 | 7357 | AN11313 |
| 1704 | CONTIG27 | 40667  | 41016  | 1.13 | 3.34E-02 | transcription_start_site | + | 45525  | 45525  | -4683 | 7358 | AN11313 |
| 2232 | CONTIG27 | 43592  | 44605  | 0.76 | 9.90E-02 | transcription_start_site | + | 45087  | 45087  | -988  | 7357 | AN11313 |
| 2232 | CONTIG27 | 43592  | 44605  | 0.76 | 9.90E-02 | transcription_start_site | + | 45525  | 45525  | -1426 | 7358 | AN11313 |
| 509  | CONTIG29 | 113193 | 113532 | 2.3  | 2.49E-03 | transcription_start_site | + | 114345 | 114345 | -982  | 7365 | AN11316 |
| 509  | CONTIG29 | 113193 | 113532 | 2.3  | 2.49E-03 | transcription_start_site | + | 114546 | 114546 | -1183 | 7366 | AN11316 |
| 509  | CONTIG29 | 113193 | 113532 | 2.3  | 2.49E-03 | transcription_start_site | + | 114737 | 114737 | -1374 | 7367 | AN11316 |
| 824  | CONTIG29 | 257637 | 258064 | 1.91 | 1.80E-02 | transcription_start_site | - | 252834 | 252834 | -5016 | 7375 | AN11319 |
| 824  | CONTIG29 | 257637 | 258064 | 1.91 | 1.80E-02 | transcription_start_site | - | 252654 | 252654 | -5196 | 7376 | AN11319 |
| 229  | CONTIG16 | 274365 | 274644 | 2.75 | 1.09E-03 | transcription_start_site | - | 271508 | 271508 | -2996 | 7378 | AN1132  |
| 173  | CONTIG30 | 60076  | 60378  | 2.89 | 0.00E+00 | transcription_start_site | + | 60730  | 60730  | -503  | 7381 | AN11321 |
| 173  | CONTIG30 | 60076  | 60378  | 2.89 | 0.00E+00 | transcription_start_site | + | 60836  | 60836  | -609  | 7382 | AN11321 |
| 173  | CONTIG30 | 60076  | 60378  | 2.89 | 0.00E+00 | transcription_start_site | + | 61014  | 61014  | -787  | 7383 | AN11321 |
| 173  | CONTIG30 | 60076  | 60378  | 2.89 | 0.00E+00 | transcription_start_site | + | 61241  | 61241  | -1014 | 7384 | AN11321 |
| 711  | CONTIG32 | 122188 | 122532 | 2.04 | 3.78E-03 | transcription_start_site | - | 121332 | 121332 | -1028 | 7389 | AN11323 |
| 711  | CONTIG32 | 122188 | 122532 | 2.04 | 3.78E-03 | transcription_start_site | - | 121215 | 121215 | -1145 | 7390 | AN11323 |
| 790  | CONTIG32 | 209786 | 210517 | 1.95 | 4.92E-03 | transcription_start_site | - | 210485 | 210485 | 333   | 7393 | AN11324 |
| 790  | CONTIG32 | 209786 | 210517 | 1.95 | 4.92E-03 | transcription_start_site | - | 210742 | 210742 | 590   | 7392 | AN11324 |
| 790  | CONTIG32 | 209786 | 210517 | 1.95 | 4.92E-03 | transcription_start_site | - | 211007 | 211007 | 855   | 7391 | AN11324 |
| 127  | CONTIG32 | 270016 | 270520 | 3.03 | 0.00E+00 | transcription_start_site | - | 269346 | 269346 | -922  | 7394 | AN11325 |
| 127  | CONTIG32 | 270016 | 270520 | 3.03 | 0.00E+00 | transcription_start_site | - | 269261 | 269261 | -1007 | 7395 | AN11325 |
| 150  | CONTIG32 | 268895 | 269906 | 2.95 | 0.00E+00 | transcription_start_site | - | 269346 | 269346 | -54   | 7394 | AN11325 |
| 150  | CONTIG32 | 268895 | 269906 | 2.95 | 0.00E+00 | transcription_start_site | - | 269261 | 269261 | -139  | 7395 | AN11325 |
| 375  | CONTIG32 | 431638 | 431917 | 2.49 | 1.77E-03 | transcription_start_site | - | 429012 | 429012 | -2765 | 7400 | AN11328 |
| 375  | CONTIG32 | 431638 | 431917 | 2.49 | 1.77E-03 | transcription_start_site | - | 428861 | 428861 | -2916 | 7401 | AN11328 |
| 2036 | CONTIG34 | 145126 | 145945 | 0.92 | 1.38E-01 | transcription_start_site | - | 146097 | 146097 | 561   | 7403 | AN11329 |
| 2036 | CONTIG34 | 145126 | 145945 | 0.92 | 1.38E-01 | transcription_start_site | - | 146315 | 146315 | 779   | 7402 | AN11329 |
| 229  | CONTIG16 | 274365 | 274644 | 2.75 | 1.09E-03 | transcription_start_site | + | 273602 | 273602 | 902   | 7406 | AN1133  |
| 229  | CONTIG16 | 274365 | 274644 | 2.75 | 1.09E-03 | transcription_start_site | + | 273472 | 273472 | 1032  | 7405 | AN1133  |
| 638  | CONTIG38 | 194491 | 195290 | 2.12 | 2.06E-04 | transcription_start_site | - | 190795 | 190795 | -4095 | 7416 | AN11333 |
| 638  | CONTIG38 | 194491 | 195290 | 2.12 | 2.06E-04 | transcription_start_site | - | 190512 | 190512 | -4378 | 7417 | AN11333 |
| 909  | CONTIG39 | 177078 | 177600 | 1.82 | 1.37E-02 | transcription_start_site | - | 177067 | 177067 | -272  | 7424 | AN11337 |
| 909  | CONTIG39 | 177078 | 177600 | 1.82 | 1.37E-02 | transcription_start_site | - | 176957 | 176957 | -382  | 7425 | AN11337 |

|      |          |         |         |      |          |                          |   |         |         |       |      |         |
|------|----------|---------|---------|------|----------|--------------------------|---|---------|---------|-------|------|---------|
| 229  | CONTIG16 | 274365  | 274644  | 2.75 | 1.09E-03 | transcription_start_site | + | 275399  | 275399  | -894  | 7431 | AN1134  |
| 930  | CONTIG40 | 133741  | 134005  | 1.8  | 2.63E-02 | transcription_start_site | + | 135754  | 135754  | -1881 | 7436 | AN11342 |
| 930  | CONTIG40 | 133741  | 134005  | 1.8  | 2.63E-02 | transcription_start_site | + | 135791  | 135791  | -1918 | 7437 | AN11342 |
| 930  | CONTIG40 | 133741  | 134005  | 1.8  | 2.63E-02 | transcription_start_site | + | 136158  | 136158  | -2285 | 7438 | AN11342 |
| 930  | CONTIG40 | 133741  | 134005  | 1.8  | 2.63E-02 | transcription_start_site | + | 136244  | 136244  | -2371 | 7439 | AN11342 |
| 663  | CONTIG42 | 28803   | 29092   | 2.09 | 5.08E-03 | transcription_start_site | - | 27553   | 27553   | -1394 | 7446 | AN11345 |
| 663  | CONTIG42 | 28803   | 29092   | 2.09 | 5.08E-03 | transcription_start_site | - | 27510   | 27510   | -1437 | 7447 | AN11345 |
| 663  | CONTIG42 | 28803   | 29092   | 2.09 | 5.08E-03 | transcription_start_site | - | 28808   | 28808   | -139  | 7448 | AN11346 |
| 663  | CONTIG42 | 28803   | 29092   | 2.09 | 5.08E-03 | transcription_start_site | - | 28224   | 28224   | -723  | 7449 | AN11346 |
| 2088 | CONTIG43 | 138530  | 138804  | 0.89 | 1.54E-01 | transcription_start_site | + | 143353  | 143353  | -4686 | 7454 | AN11348 |
| 2088 | CONTIG43 | 138530  | 138804  | 0.89 | 1.54E-01 | transcription_start_site | + | 143423  | 143423  | -4756 | 7455 | AN11348 |
| 2135 | CONTIG43 | 193426  | 194075  | 0.85 | 1.15E-01 | transcription_start_site | - | 194167  | 194167  | 416   | 7461 | AN11350 |
| 2135 | CONTIG43 | 193426  | 194075  | 0.85 | 1.15E-01 | transcription_start_site | - | 194251  | 194251  | 500   | 7460 | AN11350 |
| 2377 | CONTIG44 | 3096    | 3425    | 0.4  | 1.97E-01 | transcription_start_site | + | 6024    | 6024    | -2763 | 7467 | AN11353 |
| 2377 | CONTIG44 | 3096    | 3425    | 0.4  | 1.97E-01 | transcription_start_site | + | 6158    | 6158    | -2897 | 7468 | AN11353 |
| 2141 | CONTIG45 | 51164   | 51428   | 0.84 | 6.04E-02 | transcription_start_site | - | 49454   | 49454   | -1842 | 7471 | AN11355 |
| 2141 | CONTIG45 | 51164   | 51428   | 0.84 | 6.04E-02 | transcription_start_site | - | 49374   | 49374   | -1922 | 7472 | AN11355 |
| 2141 | CONTIG45 | 51164   | 51428   | 0.84 | 6.04E-02 | transcription_start_site | - | 49308   | 49308   | -1988 | 7473 | AN11355 |
| 2141 | CONTIG45 | 51164   | 51428   | 0.84 | 6.04E-02 | transcription_start_site | - | 49208   | 49208   | -2088 | 7474 | AN11355 |
| 2141 | CONTIG45 | 51164   | 51428   | 0.84 | 6.04E-02 | transcription_start_site | - | 49094   | 49094   | -2202 | 7475 | AN11355 |
| 2141 | CONTIG45 | 51164   | 51428   | 0.84 | 6.04E-02 | transcription_start_site | - | 48907   | 48907   | -2389 | 7476 | AN11355 |
| 229  | CONTIG16 | 274365  | 274644  | 2.75 | 1.09E-03 | transcription_start_site | + | 279106  | 279106  | -4601 | 7489 | AN1136  |
| 229  | CONTIG16 | 274365  | 274644  | 2.75 | 1.09E-03 | transcription_start_site | + | 279332  | 279332  | -4827 | 7490 | AN1136  |
| 229  | CONTIG16 | 274365  | 274644  | 2.75 | 1.09E-03 | transcription_start_site | + | 279523  | 279523  | -5018 | 7491 | AN1136  |
| 848  | CONTIG46 | 93534   | 93956   | 1.88 | 9.32E-03 | transcription_start_site | + | 98956   | 98956   | -5211 | 7494 | AN11360 |
| 1488 | CONTIG49 | 70518   | 70927   | 1.28 | 2.29E-02 | transcription_start_site | - | 71420   | 71420   | 697   | 7499 | AN11362 |
| 1488 | CONTIG49 | 70518   | 70927   | 1.28 | 2.29E-02 | transcription_start_site | - | 71614   | 71614   | 891   | 7498 | AN11362 |
| 2280 | CONTIG49 | 75376   | 75955   | 0.7  | 1.57E-01 | transcription_start_site | - | 71614   | 71614   | -4051 | 7498 | AN11362 |
| 2280 | CONTIG49 | 75376   | 75955   | 0.7  | 1.57E-01 | transcription_start_site | - | 71420   | 71420   | -4245 | 7499 | AN11362 |
| 547  | CONTIG50 | 33768   | 34487   | 2.25 | 1.20E-03 | transcription_start_site | - | 30852   | 30852   | -3275 | 7514 | AN11368 |
| 547  | CONTIG50 | 33768   | 34487   | 2.25 | 1.20E-03 | transcription_start_site | - | 30220   | 30220   | -3907 | 7515 | AN11368 |
| 1194 | CONTIG50 | 30753   | 31197   | 1.53 | 3.01E-02 | transcription_start_site | - | 30852   | 30852   | -123  | 7514 | AN11368 |
| 1194 | CONTIG50 | 30753   | 31197   | 1.53 | 3.01E-02 | transcription_start_site | - | 30220   | 30220   | -755  | 7515 | AN11368 |
| 40   | CONTIG51 | 275411  | 275843  | 3.29 | 0.00E+00 | transcription_start_site | + | 280645  | 280645  | -5018 | 7528 | AN11373 |
| 40   | CONTIG51 | 275411  | 275843  | 3.29 | 0.00E+00 | transcription_start_site | + | 280815  | 280815  | -5188 | 7529 | AN11373 |
| 322  | CONTIG51 | 275946  | 277105  | 2.59 | 7.63E-04 | transcription_start_site | + | 280645  | 280645  | -4119 | 7528 | AN11373 |
| 322  | CONTIG51 | 275946  | 277105  | 2.59 | 7.63E-04 | transcription_start_site | + | 280815  | 280815  | -4289 | 7529 | AN11373 |
| 322  | CONTIG51 | 275946  | 277105  | 2.59 | 7.63E-04 | transcription_start_site | + | 280986  | 280986  | -4460 | 7530 | AN11373 |
| 1430 | CONTIG51 | 1005245 | 1006036 | 1.32 | 2.88E-02 | transcription_start_site | - | 1006727 | 1006727 | 1086  | 7534 | AN11375 |
| 839  | CONTIG51 | 1004795 | 1005087 | 1.89 | 1.37E-02 | transcription_start_site | + | 1007731 | 1007731 | -2790 | 7535 | AN11376 |
| 1430 | CONTIG51 | 1005245 | 1006036 | 1.32 | 2.88E-02 | transcription_start_site | + | 1007731 | 1007731 | -2090 | 7535 | AN11376 |
| 1575 | CONTIG53 | 44121   | 44535   | 1.22 | 8.63E-02 | transcription_start_site | - | 43874   | 43874   | -454  | 7539 | AN11378 |
| 1575 | CONTIG53 | 44121   | 44535   | 1.22 | 8.63E-02 | transcription_start_site | - | 43751   | 43751   | -577  | 7540 | AN11378 |
| 1575 | CONTIG53 | 44121   | 44535   | 1.22 | 8.63E-02 | transcription_start_site | - | 43543   | 43543   | -785  | 7541 | AN11378 |
| 1576 | CONTIG53 | 48601   | 49340   | 1.22 | 8.63E-02 | transcription_start_site | - | 43874   | 43874   | -5096 | 7539 | AN11378 |
| 1576 | CONTIG53 | 48601   | 49340   | 1.22 | 8.63E-02 | transcription_start_site | - | 43751   | 43751   | -5219 | 7540 | AN11378 |
| 2292 | CONTIG55 | 137327  | 137850  | 0.68 | 1.81E-01 | transcription_start_site | - | 138547  | 138547  | 958   | 7559 | AN11384 |
| 2292 | CONTIG55 | 137327  | 137850  | 0.68 | 1.81E-01 | transcription_start_site | + | 140545  | 140545  | -2956 | 7560 | AN11385 |
| 1242 | CONTIG55 | 204690  | 205051  | 1.49 | 1.06E-02 | transcription_start_site | - | 200676  | 200676  | -4194 | 7571 | AN11389 |
| 1242 | CONTIG55 | 204690  | 205051  | 1.49 | 1.06E-02 | transcription_start_site | - | 200479  | 200479  | -4391 | 7572 | AN11389 |
| 1242 | CONTIG55 | 204690  | 205051  | 1.49 | 1.06E-02 | transcription_start_site | - | 199980  | 199980  | -4890 | 7573 | AN11389 |
| 1448 | CONTIG16 | 288079  | 288957  | 1.31 | 9.60E-02 | transcription_start_site | - | 284878  | 284878  | -3640 | 7574 | AN1139  |
| 388  | CONTIG55 | 291905  | 292404  | 2.46 | 0.00E+00 | transcription_start_site | + | 296900  | 296900  | -4745 | 7577 | AN11391 |
| 388  | CONTIG55 | 291905  | 292404  | 2.46 | 0.00E+00 | transcription_start_site | + | 296955  | 296955  | -4800 | 7578 | AN11391 |
| 2263 | CONTIG59 | 170343  | 170774  | 0.72 | 1.08E-01 | transcription_start_site | - | 171096  | 171096  | 537   | 7592 | AN11398 |
| 2263 | CONTIG59 | 170343  | 170774  | 0.72 | 1.08E-01 | transcription_start_site | - | 171442  | 171442  | 883   | 7591 | AN11398 |
| 2278 | CONTIG60 | 27921   | 28354   | 0.7  | 1.08E-01 | transcription_start_site | + | 26953   | 26953   | 1184  | 7594 | AN11399 |

|      |          |        |        |      |          |                          |   |        |        |       |      |         |
|------|----------|--------|--------|------|----------|--------------------------|---|--------|--------|-------|------|---------|
| 2278 | CONTIG60 | 27921  | 28354  | 0.7  | 1.08E-01 | transcription_start_site | + | 32603  | 32603  | -4465 | 7602 | AN11401 |
| 2278 | CONTIG60 | 27921  | 28354  | 0.7  | 1.08E-01 | transcription_start_site | + | 32671  | 32671  | -4533 | 7603 | AN11401 |
| 385  | CONTIG61 | 98928  | 99224  | 2.47 | 7.06E-04 | transcription_start_site | - | 94176  | 94176  | -4900 | 7610 | AN11404 |
| 385  | CONTIG61 | 98928  | 99224  | 2.47 | 7.06E-04 | transcription_start_site | - | 94084  | 94084  | -4992 | 7611 | AN11404 |
| 385  | CONTIG61 | 98928  | 99224  | 2.47 | 7.06E-04 | transcription_start_site | - | 93997  | 93997  | -5079 | 7612 | AN11404 |
| 1250 | CONTIG61 | 381226 | 381595 | 1.48 | 1.61E-02 | transcription_start_site | - | 382531 | 382531 | 1120  | 7622 | AN11408 |
| 1818 | CONTIG61 | 386711 | 387445 | 1.06 | 1.22E-01 | transcription_start_site | - | 382862 | 382862 | -4216 | 7621 | AN11408 |
| 1818 | CONTIG61 | 386711 | 387445 | 1.06 | 1.22E-01 | transcription_start_site | - | 382531 | 382531 | -4547 | 7622 | AN11408 |
| 1573 | CONTIG61 | 514879 | 515378 | 1.22 | 7.66E-02 | transcription_start_site | - | 510375 | 510375 | -4753 | 7629 | AN11411 |
| 1573 | CONTIG61 | 514879 | 515378 | 1.22 | 7.66E-02 | transcription_start_site | - | 510246 | 510246 | -4882 | 7630 | AN11411 |
| 1573 | CONTIG61 | 514879 | 515378 | 1.22 | 7.66E-02 | transcription_start_site | - | 510079 | 510079 | -5049 | 7631 | AN11411 |
| 1573 | CONTIG61 | 514879 | 515378 | 1.22 | 7.66E-02 | transcription_start_site | - | 509966 | 509966 | -5162 | 7632 | AN11411 |
| 254  | CONTIG61 | 567152 | 567450 | 2.7  | 0.00E+00 | transcription_start_site | - | 567638 | 567638 | 337   | 7635 | AN11412 |
| 254  | CONTIG61 | 567152 | 567450 | 2.7  | 0.00E+00 | transcription_start_site | - | 567797 | 567797 | 496   | 7634 | AN11412 |
| 876  | CONTIG61 | 566177 | 566761 | 1.86 | 9.96E-03 | transcription_start_site | - | 567638 | 567638 | 1169  | 7635 | AN11412 |
| 1333 | CONTIG61 | 732169 | 732653 | 1.41 | 2.07E-02 | transcription_start_site | - | 728856 | 728856 | -3555 | 7639 | AN11414 |
| 1333 | CONTIG61 | 732169 | 732653 | 1.41 | 2.07E-02 | transcription_start_site | - | 728658 | 728658 | -3753 | 7640 | AN11414 |
| 1333 | CONTIG61 | 732169 | 732653 | 1.41 | 2.07E-02 | transcription_start_site | - | 733204 | 733204 | 793   | 7642 | AN11415 |
| 1333 | CONTIG61 | 732169 | 732653 | 1.41 | 2.07E-02 | transcription_start_site | - | 733391 | 733391 | 980   | 7641 | AN11415 |
| 768  | CONTIG61 | 757887 | 758676 | 1.97 | 0.00E+00 | transcription_start_site | + | 757612 | 757612 | 669   | 7645 | AN11416 |
| 768  | CONTIG61 | 757887 | 758676 | 1.97 | 0.00E+00 | transcription_start_site | + | 757416 | 757416 | 865   | 7644 | AN11416 |
| 768  | CONTIG61 | 757887 | 758676 | 1.97 | 0.00E+00 | transcription_start_site | + | 757219 | 757219 | 1062  | 7643 | AN11416 |
| 2062 | CONTIG61 | 756467 | 757108 | 0.91 | 1.97E-01 | transcription_start_site | + | 757219 | 757219 | -431  | 7643 | AN11416 |
| 2062 | CONTIG61 | 756467 | 757108 | 0.91 | 1.97E-01 | transcription_start_site | + | 757416 | 757416 | -628  | 7644 | AN11416 |
| 2062 | CONTIG61 | 756467 | 757108 | 0.91 | 1.97E-01 | transcription_start_site | + | 757612 | 757612 | -824  | 7645 | AN11416 |
| 1112 | CONTIG61 | 785411 | 785690 | 1.6  | 2.29E-02 | transcription_start_site | - | 785810 | 785810 | 259   | 7647 | AN11417 |
| 1112 | CONTIG61 | 785411 | 785690 | 1.6  | 2.29E-02 | transcription_start_site | - | 785901 | 785901 | 350   | 7646 | AN11417 |
| 2118 | CONTIG61 | 789306 | 790270 | 0.87 | 1.57E-01 | transcription_start_site | - | 785901 | 785901 | -3887 | 7646 | AN11417 |
| 2118 | CONTIG61 | 789306 | 790270 | 0.87 | 1.57E-01 | transcription_start_site | - | 785810 | 785810 | -3978 | 7647 | AN11417 |
| 1452 | CONTIG62 | 35931  | 36673  | 1.3  | 9.96E-03 | transcription_start_site | + | 35519  | 35519  | 783   | 7649 | AN11418 |
| 1452 | CONTIG62 | 35931  | 36673  | 1.3  | 9.96E-03 | transcription_start_site | + | 35466  | 35466  | 836   | 7648 | AN11418 |
| 1979 | CONTIG62 | 105621 | 106100 | 0.95 | 4.78E-02 | transcription_start_site | - | 105336 | 105336 | -524  | 7650 | AN11419 |
| 1979 | CONTIG62 | 105621 | 106100 | 0.95 | 4.78E-02 | transcription_start_site | - | 105123 | 105123 | -737  | 7651 | AN11419 |
| 1979 | CONTIG62 | 105621 | 106100 | 0.95 | 4.78E-02 | transcription_start_site | - | 104860 | 104860 | -1000 | 7652 | AN11419 |
| 2080 | CONTIG64 | 120993 | 121637 | 0.89 | 4.21E-02 | transcription_start_site | + | 120989 | 120989 | 326   | 7657 | AN11420 |
| 2080 | CONTIG64 | 120993 | 121637 | 0.89 | 4.21E-02 | transcription_start_site | + | 120832 | 120832 | 483   | 7656 | AN11420 |
| 2106 | CONTIG65 | 11713  | 12057  | 0.87 | 6.74E-02 | transcription_start_site | + | 11500  | 11500  | 385   | 7659 | AN11421 |
| 2106 | CONTIG65 | 11713  | 12057  | 0.87 | 6.74E-02 | transcription_start_site | + | 11449  | 11449  | 436   | 7658 | AN11421 |
| 1739 | CONTIG67 | 79057  | 79573  | 1.11 | 9.60E-02 | transcription_start_site | - | 77933  | 77933  | -1382 | 7671 | AN11426 |
| 1739 | CONTIG67 | 79057  | 79573  | 1.11 | 9.60E-02 | transcription_start_site | - | 77443  | 77443  | -1872 | 7672 | AN11426 |
| 1739 | CONTIG67 | 79057  | 79573  | 1.11 | 9.60E-02 | transcription_start_site | - | 77254  | 77254  | -2061 | 7673 | AN11426 |
| 1967 | CONTIG67 | 112503 | 112782 | 0.97 | 1.54E-01 | transcription_start_site | + | 114508 | 114508 | -1865 | 7680 | AN11428 |
| 1967 | CONTIG67 | 112503 | 112782 | 0.97 | 1.54E-01 | transcription_start_site | + | 114702 | 114702 | -2059 | 7681 | AN11428 |
| 1967 | CONTIG67 | 112503 | 112782 | 0.97 | 1.54E-01 | transcription_start_site | + | 115566 | 115566 | -2923 | 7682 | AN11428 |
| 1967 | CONTIG67 | 112503 | 112782 | 0.97 | 1.54E-01 | transcription_start_site | + | 115671 | 115671 | -3028 | 7683 | AN11428 |
| 1967 | CONTIG67 | 112503 | 112782 | 0.97 | 1.54E-01 | transcription_start_site | + | 115910 | 115910 | -3267 | 7684 | AN11428 |
| 337  | CONTIG68 | 96905  | 97267  | 2.55 | 0.00E+00 | transcription_start_site | - | 93780  | 93780  | -3306 | 7690 | AN11431 |
| 337  | CONTIG68 | 96905  | 97267  | 2.55 | 0.00E+00 | transcription_start_site | - | 93525  | 93525  | -3561 | 7691 | AN11431 |
| 337  | CONTIG68 | 96905  | 97267  | 2.55 | 0.00E+00 | transcription_start_site | - | 93430  | 93430  | -3656 | 7692 | AN11431 |
| 1227 | CONTIG68 | 92868  | 93289  | 1.5  | 1.37E-02 | transcription_start_site | - | 93430  | 93430  | 351   | 7692 | AN11431 |
| 1227 | CONTIG68 | 92868  | 93289  | 1.5  | 1.37E-02 | transcription_start_site | - | 93525  | 93525  | 446   | 7691 | AN11431 |
| 1227 | CONTIG68 | 92868  | 93289  | 1.5  | 1.37E-02 | transcription_start_site | - | 93780  | 93780  | 701   | 7690 | AN11431 |
| 1772 | CONTIG75 | 139279 | 139929 | 1.09 | 8.54E-02 | transcription_start_site | - | 139797 | 139797 | 193   | 7702 | AN11435 |
| 1772 | CONTIG75 | 139279 | 139929 | 1.09 | 8.54E-02 | transcription_start_site | - | 139328 | 139328 | -276  | 7703 | AN11435 |
| 1772 | CONTIG75 | 139279 | 139929 | 1.09 | 8.54E-02 | transcription_start_site | - | 139131 | 139131 | -473  | 7704 | AN11435 |
| 740  | CONTIG76 | 134405 | 134695 | 2.01 | 1.25E-02 | transcription_start_site | - | 135003 | 135003 | 453   | 7709 | AN11437 |
| 740  | CONTIG76 | 134405 | 134695 | 2.01 | 1.25E-02 | transcription_start_site | - | 135034 | 135034 | 484   | 7708 | AN11437 |

|      |          |        |        |      |          |                          |   |        |        |       |      |         |
|------|----------|--------|--------|------|----------|--------------------------|---|--------|--------|-------|------|---------|
| 740  | CONTIG76 | 134405 | 134695 | 2.01 | 1.25E-02 | transcription_start_site | - | 135122 | 135122 | 572   | 7707 | AN11437 |
| 740  | CONTIG76 | 134405 | 134695 | 2.01 | 1.25E-02 | transcription_start_site | - | 135178 | 135178 | 628   | 7706 | AN11437 |
| 770  | CONTIG76 | 136208 | 136938 | 1.97 | 9.40E-04 | transcription_start_site | - | 135178 | 135178 | -1395 | 7706 | AN11437 |
| 770  | CONTIG76 | 136208 | 136938 | 1.97 | 9.40E-04 | transcription_start_site | - | 135122 | 135122 | -1451 | 7707 | AN11437 |
| 770  | CONTIG76 | 136208 | 136938 | 1.97 | 9.40E-04 | transcription_start_site | - | 135034 | 135034 | -1539 | 7708 | AN11437 |
| 770  | CONTIG76 | 136208 | 136938 | 1.97 | 9.40E-04 | transcription_start_site | - | 135003 | 135003 | -1570 | 7709 | AN11437 |
| 808  | CONTIG76 | 134943 | 135362 | 1.93 | 1.54E-02 | transcription_start_site | - | 135178 | 135178 | 25    | 7706 | AN11437 |
| 808  | CONTIG76 | 134943 | 135362 | 1.93 | 1.54E-02 | transcription_start_site | - | 135122 | 135122 | -30   | 7707 | AN11437 |
| 808  | CONTIG76 | 134943 | 135362 | 1.93 | 1.54E-02 | transcription_start_site | - | 135034 | 135034 | -118  | 7708 | AN11437 |
| 808  | CONTIG76 | 134943 | 135362 | 1.93 | 1.54E-02 | transcription_start_site | - | 135003 | 135003 | -149  | 7709 | AN11437 |
| 1130 | CONTIG76 | 137629 | 138669 | 1.58 | 2.02E-03 | transcription_start_site | - | 135178 | 135178 | -2971 | 7706 | AN11437 |
| 1130 | CONTIG76 | 137629 | 138669 | 1.58 | 2.02E-03 | transcription_start_site | - | 135122 | 135122 | -3027 | 7707 | AN11437 |
| 1130 | CONTIG76 | 137629 | 138669 | 1.58 | 2.02E-03 | transcription_start_site | - | 135034 | 135034 | -3115 | 7708 | AN11437 |
| 1130 | CONTIG76 | 137629 | 138669 | 1.58 | 2.02E-03 | transcription_start_site | - | 135003 | 135003 | -3146 | 7709 | AN11437 |
| 1490 | CONTIG77 | 35117  | 35601  | 1.28 | 2.63E-02 | transcription_start_site | + | 35335  | 35335  | 24    | 7710 | AN11438 |
| 1490 | CONTIG77 | 35117  | 35601  | 1.28 | 2.63E-02 | transcription_start_site | + | 35391  | 35391  | -32   | 7711 | AN11438 |
| 1651 | CONTIG78 | 138771 | 139270 | 1.17 | 4.73E-02 | transcription_start_site | - | 138687 | 138687 | -333  | 7721 | AN11440 |
| 1651 | CONTIG78 | 138771 | 139270 | 1.17 | 4.73E-02 | transcription_start_site | - | 138360 | 138360 | -660  | 7722 | AN11440 |
| 2119 | CONTIG78 | 342683 | 343252 | 0.87 | 1.57E-01 | transcription_start_site | - | 342561 | 342561 | -406  | 7727 | AN11443 |
| 2119 | CONTIG78 | 342683 | 343252 | 0.87 | 1.57E-01 | transcription_start_site | - | 342386 | 342386 | -581  | 7728 | AN11443 |
| 675  | CONTIG79 | 86626  | 87520  | 2.07 | 7.31E-04 | transcription_start_site | - | 86758  | 86758  | -315  | 7733 | AN11445 |
| 675  | CONTIG79 | 86626  | 87520  | 2.07 | 7.31E-04 | transcription_start_site | - | 86607  | 86607  | -466  | 7734 | AN11445 |
| 79   | CONTIG80 | 32939  | 33433  | 3.14 | 0.00E+00 | transcription_start_site | + | 35483  | 35483  | -2297 | 7735 | AN11446 |
| 79   | CONTIG80 | 32939  | 33433  | 3.14 | 0.00E+00 | transcription_start_site | + | 35594  | 35594  | -2408 | 7736 | AN11446 |
| 79   | CONTIG80 | 32939  | 33433  | 3.14 | 0.00E+00 | transcription_start_site | + | 35873  | 35873  | -2687 | 7737 | AN11446 |
| 630  | CONTIG80 | 35037  | 35601  | 2.14 | 5.08E-03 | transcription_start_site | + | 35483  | 35483  | -164  | 7735 | AN11446 |
| 630  | CONTIG80 | 35037  | 35601  | 2.14 | 5.08E-03 | transcription_start_site | + | 35594  | 35594  | -275  | 7736 | AN11446 |
| 630  | CONTIG80 | 35037  | 35601  | 2.14 | 5.08E-03 | transcription_start_site | + | 35873  | 35873  | -554  | 7737 | AN11446 |
| 1724 | CONTIG81 | 136221 | 136480 | 1.12 | 5.36E-02 | transcription_start_site | - | 131300 | 131300 | -5050 | 7738 | AN11447 |
| 1724 | CONTIG81 | 136221 | 136480 | 1.12 | 5.36E-02 | transcription_start_site | - | 131225 | 131225 | -5125 | 7739 | AN11447 |
| 2156 | CONTIG82 | 30983  | 31349  | 0.82 | 3.01E-02 | transcription_start_site | + | 31212  | 31212  | -46   | 7740 | AN11448 |
| 2156 | CONTIG82 | 30983  | 31349  | 0.82 | 3.01E-02 | transcription_start_site | + | 31313  | 31313  | -147  | 7741 | AN11448 |
| 2317 | CONTIG82 | 25354  | 26228  | 0.64 | 8.63E-02 | transcription_start_site | + | 31212  | 31212  | -5421 | 7740 | AN11448 |
| 439  | CONTIG16 | 307064 | 307413 | 2.4  | 1.41E-03 | transcription_start_site | - | 302632 | 302632 | -4606 | 7744 | AN11445 |
| 439  | CONTIG16 | 307064 | 307413 | 2.4  | 1.41E-03 | transcription_start_site | - | 302398 | 302398 | -4840 | 7745 | AN11445 |
| 1792 | CONTIG84 | 230107 | 230753 | 1.08 | 1.34E-01 | transcription_start_site | + | 234289 | 234289 | -3859 | 7749 | AN11450 |
| 1792 | CONTIG84 | 230107 | 230753 | 1.08 | 1.34E-01 | transcription_start_site | + | 234403 | 234403 | -3973 | 7750 | AN11450 |
| 563  | CONTIG84 | 249471 | 250036 | 2.24 | 9.32E-03 | transcription_start_site | - | 250159 | 250159 | 405   | 7754 | AN11452 |
| 563  | CONTIG84 | 249471 | 250036 | 2.24 | 9.32E-03 | transcription_start_site | - | 250622 | 250622 | 868   | 7753 | AN11452 |
| 515  | CONTIG85 | 10821  | 11243  | 2.29 | 1.53E-03 | transcription_start_site | - | 10816  | 10816  | -216  | 7761 | AN11456 |
| 515  | CONTIG85 | 10821  | 11243  | 2.29 | 1.53E-03 | transcription_start_site | - | 10705  | 10705  | -327  | 7762 | AN11456 |
| 214  | CONTIG86 | 66470  | 67029  | 2.8  | 5.08E-03 | transcription_start_site | - | 66505  | 66505  | -244  | 7778 | AN11459 |
| 233  | CONTIG86 | 89252  | 89613  | 2.75 | 6.24E-03 | transcription_start_site | - | 88421  | 88421  | -1011 | 7779 | AN11460 |
| 233  | CONTIG86 | 89252  | 89613  | 2.75 | 6.24E-03 | transcription_start_site | - | 88265  | 88265  | -1167 | 7780 | AN11460 |
| 811  | CONTIG86 | 88513  | 89175  | 1.92 | 4.20E-02 | transcription_start_site | - | 88421  | 88421  | -423  | 7779 | AN11460 |
| 811  | CONTIG86 | 88513  | 89175  | 1.92 | 4.20E-02 | transcription_start_site | - | 88265  | 88265  | -579  | 7780 | AN11460 |
| 1017 | CONTIG86 | 96396  | 96732  | 1.71 | 6.74E-02 | transcription_start_site | + | 99590  | 99590  | -3026 | 7781 | AN11461 |
| 1017 | CONTIG86 | 96396  | 96732  | 1.71 | 6.74E-02 | transcription_start_site | + | 99806  | 99806  | -3242 | 7782 | AN11461 |
| 2369 | CONTIG87 | 2326   | 2771   | 0.44 | 1.38E-01 | transcription_start_site | - | 2938   | 2938   | 389   | 7790 | AN11462 |
| 2369 | CONTIG87 | 2326   | 2771   | 0.44 | 1.38E-01 | transcription_start_site | - | 3014   | 3014   | 465   | 7789 | AN11462 |
| 2369 | CONTIG87 | 2326   | 2771   | 0.44 | 1.38E-01 | transcription_start_site | - | 3186   | 3186   | 637   | 7788 | AN11462 |
| 2369 | CONTIG87 | 2326   | 2771   | 0.44 | 1.38E-01 | transcription_start_site | - | 3381   | 3381   | 832   | 7787 | AN11462 |
| 2369 | CONTIG87 | 2326   | 2771   | 0.44 | 1.38E-01 | transcription_start_site | - | 3509   | 3509   | 960   | 7786 | AN11462 |
| 2369 | CONTIG87 | 2326   | 2771   | 0.44 | 1.38E-01 | transcription_start_site | - | 3716   | 3716   | 1167  | 7785 | AN11462 |
| 2374 | CONTIG87 | 3452   | 3900   | 0.41 | 1.76E-01 | transcription_start_site | - | 3716   | 3716   | 40    | 7785 | AN11462 |
| 2374 | CONTIG87 | 3452   | 3900   | 0.41 | 1.76E-01 | transcription_start_site | - | 3800   | 3800   | 124   | 7784 | AN11462 |
| 2374 | CONTIG87 | 3452   | 3900   | 0.41 | 1.76E-01 | transcription_start_site | - | 3509   | 3509   | -167  | 7786 | AN11462 |

|      |          |        |        |      |          |                          |   |        |        |       |      |         |
|------|----------|--------|--------|------|----------|--------------------------|---|--------|--------|-------|------|---------|
| 2374 | CONTIG87 | 3452   | 3900   | 0.41 | 1.76E-01 | transcription_start_site | - | 3870   | 3870   | 194   | 7783 | AN11462 |
| 2374 | CONTIG87 | 3452   | 3900   | 0.41 | 1.76E-01 | transcription_start_site | - | 3381   | 3381   | -295  | 7787 | AN11462 |
| 2374 | CONTIG87 | 3452   | 3900   | 0.41 | 1.76E-01 | transcription_start_site | - | 3186   | 3186   | -490  | 7788 | AN11462 |
| 2374 | CONTIG87 | 3452   | 3900   | 0.41 | 1.76E-01 | transcription_start_site | - | 3014   | 3014   | -662  | 7789 | AN11462 |
| 2374 | CONTIG87 | 3452   | 3900   | 0.41 | 1.76E-01 | transcription_start_site | - | 2938   | 2938   | -738  | 7790 | AN11462 |
| 618  | CONTIG88 | 159244 | 159593 | 2.16 | 8.43E-04 | transcription_start_site | + | 158481 | 158481 | 937   | 7796 | AN11465 |
| 618  | CONTIG88 | 159244 | 159593 | 2.16 | 8.43E-04 | transcription_start_site | + | 158405 | 158405 | 1013  | 7795 | AN11465 |
| 2149 | CONTIG89 | 134254 | 135059 | 0.84 | 1.76E-01 | transcription_start_site | + | 137035 | 137035 | -2378 | 7803 | AN11469 |
| 2149 | CONTIG89 | 134254 | 135059 | 0.84 | 1.76E-01 | transcription_start_site | + | 137193 | 137193 | -2536 | 7804 | AN11469 |
| 2149 | CONTIG89 | 134254 | 135059 | 0.84 | 1.76E-01 | transcription_start_site | + | 137292 | 137292 | -2635 | 7805 | AN11469 |
| 250  | CONTIG16 | 313742 | 314076 | 2.71 | 7.31E-04 | transcription_start_site | - | 308783 | 308783 | -5126 | 7806 | AN1147  |
| 1592 | CONTIG89 | 200861 | 201135 | 1.21 | 4.78E-02 | transcription_start_site | - | 196868 | 196868 | -4130 | 7807 | AN11470 |
| 1592 | CONTIG89 | 200861 | 201135 | 1.21 | 4.78E-02 | transcription_start_site | - | 196763 | 196763 | -4235 | 7808 | AN11470 |
| 2000 | CONTIG89 | 195693 | 196267 | 0.94 | 7.38E-02 | transcription_start_site | - | 196763 | 196763 | 783   | 7808 | AN11470 |
| 2000 | CONTIG89 | 195693 | 196267 | 0.94 | 7.38E-02 | transcription_start_site | - | 196868 | 196868 | 888   | 7807 | AN11470 |
| 2282 | CONTIG89 | 201676 | 202636 | 0.7  | 1.64E-01 | transcription_start_site | - | 196868 | 196868 | -5288 | 7807 | AN11470 |
| 2282 | CONTIG89 | 201676 | 202636 | 0.7  | 1.64E-01 | transcription_start_site | - | 196763 | 196763 | -5393 | 7808 | AN11470 |
| 129  | CONTIG89 | 224567 | 225141 | 3.01 | 0.00E+00 | transcription_start_site | + | 228691 | 228691 | -3837 | 7809 | AN11471 |
| 129  | CONTIG89 | 224567 | 225141 | 3.01 | 0.00E+00 | transcription_start_site | + | 228835 | 228835 | -3981 | 7810 | AN11471 |
| 129  | CONTIG89 | 224567 | 225141 | 3.01 | 0.00E+00 | transcription_start_site | + | 228924 | 228924 | -4070 | 7811 | AN11471 |
| 129  | CONTIG89 | 224567 | 225141 | 3.01 | 0.00E+00 | transcription_start_site | + | 229053 | 229053 | -4199 | 7812 | AN11471 |
| 1005 | CONTIG89 | 227492 | 227901 | 1.71 | 7.70E-03 | transcription_start_site | + | 228691 | 228691 | -994  | 7809 | AN11471 |
| 1005 | CONTIG89 | 227492 | 227901 | 1.71 | 7.70E-03 | transcription_start_site | + | 228835 | 228835 | -1138 | 7810 | AN11471 |
| 1005 | CONTIG89 | 227492 | 227901 | 1.71 | 7.70E-03 | transcription_start_site | + | 228924 | 228924 | -1227 | 7811 | AN11471 |
| 1005 | CONTIG89 | 227492 | 227901 | 1.71 | 7.70E-03 | transcription_start_site | + | 229053 | 229053 | -1356 | 7812 | AN11471 |
| 798  | CONTIG89 | 268440 | 268929 | 1.94 | 2.61E-03 | transcription_start_site | - | 264398 | 264398 | -4286 | 7813 | AN11472 |
| 798  | CONTIG89 | 268440 | 268929 | 1.94 | 2.61E-03 | transcription_start_site | - | 264128 | 264128 | -4556 | 7814 | AN11472 |
| 1208 | CONTIG93 | 143334 | 143692 | 1.52 | 3.34E-02 | transcription_start_site | + | 143758 | 143758 | -245  | 7822 | AN11475 |
| 1208 | CONTIG93 | 143334 | 143692 | 1.52 | 3.34E-02 | transcription_start_site | + | 144360 | 144360 | -847  | 7823 | AN11475 |
| 850  | CONTIG93 | 272640 | 273129 | 1.88 | 1.06E-02 | transcription_start_site | - | 273475 | 273475 | 590   | 7826 | AN11476 |
| 850  | CONTIG93 | 272640 | 273129 | 1.88 | 1.06E-02 | transcription_start_site | - | 273594 | 273594 | 709   | 7825 | AN11476 |
| 850  | CONTIG93 | 272640 | 273129 | 1.88 | 1.06E-02 | transcription_start_site | - | 273731 | 273731 | 846   | 7824 | AN11476 |
| 676  | CONTIG94 | 14329  | 14753  | 2.07 | 8.43E-04 | transcription_start_site | - | 14115  | 14115  | -426  | 7827 | AN11477 |
| 676  | CONTIG94 | 14329  | 14753  | 2.07 | 8.43E-04 | transcription_start_site | - | 13952  | 13952  | -589  | 7828 | AN11477 |
| 250  | CONTIG16 | 313742 | 314076 | 2.71 | 7.31E-04 | transcription_start_site | - | 313503 | 313503 | -406  | 7833 | AN1148  |
| 250  | CONTIG16 | 313742 | 314076 | 2.71 | 7.31E-04 | transcription_start_site | - | 313281 | 313281 | -628  | 7834 | AN1148  |
| 342  | CONTIG96 | 36621  | 37195  | 2.55 | 1.53E-03 | transcription_start_site | + | 37966  | 37966  | -1058 | 7842 | AN11482 |
| 342  | CONTIG96 | 36621  | 37195  | 2.55 | 1.53E-03 | transcription_start_site | + | 38222  | 38222  | -1314 | 7843 | AN11482 |
| 1283 | CONTIG96 | 38796  | 39212  | 1.46 | 4.21E-02 | transcription_start_site | + | 38222  | 38222  | 782   | 7843 | AN11482 |
| 1283 | CONTIG96 | 38796  | 39212  | 1.46 | 4.21E-02 | transcription_start_site | + | 37966  | 37966  | 1038  | 7842 | AN11482 |
| 342  | CONTIG96 | 36621  | 37195  | 2.55 | 1.53E-03 | transcription_start_site | + | 42129  | 42129  | -5221 | 7844 | AN11483 |
| 526  | CONTIG96 | 41646  | 42657  | 2.28 | 9.32E-03 | transcription_start_site | + | 42129  | 42129  | 22    | 7844 | AN11483 |
| 526  | CONTIG96 | 41646  | 42657  | 2.28 | 9.32E-03 | transcription_start_site | + | 42370  | 42370  | -218  | 7845 | AN11483 |
| 820  | CONTIG96 | 39906  | 40325  | 1.91 | 1.06E-02 | transcription_start_site | + | 42129  | 42129  | -2013 | 7844 | AN11483 |
| 820  | CONTIG96 | 39906  | 40325  | 1.91 | 1.06E-02 | transcription_start_site | + | 42370  | 42370  | -2254 | 7845 | AN11483 |
| 821  | CONTIG96 | 41101  | 41540  | 1.91 | 1.06E-02 | transcription_start_site | + | 42129  | 42129  | -808  | 7844 | AN11483 |
| 821  | CONTIG96 | 41101  | 41540  | 1.91 | 1.06E-02 | transcription_start_site | + | 42370  | 42370  | -1049 | 7845 | AN11483 |
| 1283 | CONTIG96 | 38796  | 39212  | 1.46 | 4.21E-02 | transcription_start_site | + | 42129  | 42129  | -3125 | 7844 | AN11483 |
| 1283 | CONTIG96 | 38796  | 39212  | 1.46 | 4.21E-02 | transcription_start_site | + | 42370  | 42370  | -3366 | 7845 | AN11483 |
| 732  | CONTIG97 | 9831   | 10550  | 2.01 | 3.37E-03 | transcription_start_site | - | 10596  | 10596  | 405   | 7851 | AN11485 |
| 732  | CONTIG97 | 9831   | 10550  | 2.01 | 3.37E-03 | transcription_start_site | - | 10910  | 10910  | 719   | 7850 | AN11485 |
| 732  | CONTIG97 | 9831   | 10550  | 2.01 | 3.37E-03 | transcription_start_site | - | 11019  | 11019  | 828   | 7849 | AN11485 |
| 1465 | CONTIG98 | 104552 | 104826 | 1.3  | 8.63E-02 | transcription_start_site | + | 109534 | 109534 | -4845 | 7855 | AN11487 |
| 1465 | CONTIG98 | 104552 | 104826 | 1.3  | 8.63E-02 | transcription_start_site | + | 109729 | 109729 | -5040 | 7856 | AN11487 |
| 1181 | CONTIG98 | 168839 | 169854 | 1.55 | 4.20E-02 | transcription_start_site | - | 169365 | 169365 | 18    | 7862 | AN11488 |
| 1181 | CONTIG98 | 168839 | 169854 | 1.55 | 4.20E-02 | transcription_start_site | - | 169211 | 169211 | -135  | 7863 | AN11488 |
| 1181 | CONTIG98 | 168839 | 169854 | 1.55 | 4.20E-02 | transcription_start_site | - | 169482 | 169482 | 135   | 7861 | AN11488 |

|      |           |        |        |      |          |                          |   |        |        |       |      |         |
|------|-----------|--------|--------|------|----------|--------------------------|---|--------|--------|-------|------|---------|
| 1181 | CONTIG98  | 168839 | 169854 | 1.55 | 4.20E-02 | transcription_start_site | - | 169590 | 169590 | 243   | 7860 | AN11488 |
| 1181 | CONTIG98  | 168839 | 169854 | 1.55 | 4.20E-02 | transcription_start_site | - | 169781 | 169781 | 434   | 7859 | AN11488 |
| 274  | CONTIG100 | 119778 | 120140 | 2.67 | 8.43E-04 | transcription_start_site | - | 120089 | 120089 | 130   | 7871 | AN11491 |
| 274  | CONTIG100 | 119778 | 120140 | 2.67 | 8.43E-04 | transcription_start_site | - | 119828 | 119828 | -131  | 7872 | AN11491 |
| 274  | CONTIG100 | 119778 | 120140 | 2.67 | 8.43E-04 | transcription_start_site | - | 120828 | 120828 | 869   | 7870 | AN11491 |
| 1365 | CONTIG100 | 118663 | 119377 | 1.38 | 3.61E-02 | transcription_start_site | - | 119828 | 119828 | 808   | 7872 | AN11491 |
| 1365 | CONTIG100 | 118663 | 119377 | 1.38 | 3.61E-02 | transcription_start_site | - | 120089 | 120089 | 1069  | 7871 | AN11491 |
| 1014 | CONTIG100 | 290854 | 291301 | 1.71 | 2.63E-02 | transcription_start_site | + | 290238 | 290238 | 839   | 7875 | AN11492 |
| 1014 | CONTIG100 | 290854 | 291301 | 1.71 | 2.63E-02 | transcription_start_site | + | 290190 | 290190 | 887   | 7874 | AN11492 |
| 131  | CONTIG100 | 325515 | 326019 | 3.01 | 0.00E+00 | transcription_start_site | - | 325843 | 325843 | 76    | 7876 | AN11493 |
| 131  | CONTIG100 | 325515 | 326019 | 3.01 | 0.00E+00 | transcription_start_site | - | 325617 | 325617 | -150  | 7877 | AN11493 |
| 251  | CONTIG100 | 328427 | 329226 | 2.71 | 8.35E-04 | transcription_start_site | - | 325843 | 325843 | -2983 | 7876 | AN11493 |
| 251  | CONTIG100 | 328427 | 329226 | 2.71 | 8.35E-04 | transcription_start_site | - | 325617 | 325617 | -3209 | 7877 | AN11493 |
| 459  | CONTIG100 | 324695 | 325330 | 2.38 | 3.37E-03 | transcription_start_site | - | 325617 | 325617 | 604   | 7877 | AN11493 |
| 459  | CONTIG100 | 324695 | 325330 | 2.38 | 3.37E-03 | transcription_start_site | - | 325843 | 325843 | 830   | 7876 | AN11493 |
| 1325 | CONTIG100 | 326852 | 327951 | 1.42 | 6.04E-02 | transcription_start_site | - | 325843 | 325843 | -1558 | 7876 | AN11493 |
| 1325 | CONTIG100 | 326852 | 327951 | 1.42 | 6.04E-02 | transcription_start_site | - | 325617 | 325617 | -1784 | 7877 | AN11493 |
| 2040 | CONTIG101 | 140180 | 140461 | 0.92 | 1.76E-01 | transcription_start_site | + | 140750 | 140750 | -429  | 7880 | AN11495 |
| 2040 | CONTIG101 | 140180 | 140461 | 0.92 | 1.76E-01 | transcription_start_site | + | 140940 | 140940 | -619  | 7881 | AN11495 |
| 7    | CONTIG102 | 7885   | 8835   | 3.55 | 0.00E+00 | transcription_start_site | - | 8054   | 8054   | -306  | 7882 | AN11496 |
| 7    | CONTIG102 | 7885   | 8835   | 3.55 | 0.00E+00 | transcription_start_site | - | 7924   | 7924   | -436  | 7883 | AN11496 |
| 7    | CONTIG102 | 7885   | 8835   | 3.55 | 0.00E+00 | transcription_start_site | - | 7795   | 7795   | -565  | 7884 | AN11496 |
| 218  | CONTIG102 | 8926   | 9511   | 2.79 | 3.81E-04 | transcription_start_site | - | 8054   | 8054   | -1164 | 7882 | AN11496 |
| 218  | CONTIG102 | 8926   | 9511   | 2.79 | 3.81E-04 | transcription_start_site | - | 7924   | 7924   | -1294 | 7883 | AN11496 |
| 218  | CONTIG102 | 8926   | 9511   | 2.79 | 3.81E-04 | transcription_start_site | - | 7795   | 7795   | -1423 | 7884 | AN11496 |
| 935  | CONTIG104 | 149494 | 149753 | 1.79 | 1.37E-02 | transcription_start_site | - | 145833 | 145833 | -3790 | 7888 | AN11498 |
| 935  | CONTIG104 | 149494 | 149753 | 1.79 | 1.37E-02 | transcription_start_site | - | 145719 | 145719 | -3904 | 7889 | AN11498 |
| 2253 | CONTIG104 | 144017 | 144818 | 0.74 | 1.67E-01 | transcription_start_site | - | 145719 | 145719 | 1301  | 7889 | AN11498 |
| 250  | CONTIG16  | 313742 | 314076 | 2.71 | 7.31E-04 | transcription_start_site | + | 315652 | 315652 | -1743 | 7893 | AN1150  |
| 250  | CONTIG16  | 313742 | 314076 | 2.71 | 7.31E-04 | transcription_start_site | + | 315792 | 315792 | -1883 | 7894 | AN1150  |
| 250  | CONTIG16  | 313742 | 314076 | 2.71 | 7.31E-04 | transcription_start_site | + | 316110 | 316110 | -2201 | 7895 | AN1150  |
| 151  | CONTIG105 | 218326 | 218685 | 2.95 | 0.00E+00 | transcription_start_site | + | 218403 | 218403 | 102   | 7902 | AN11502 |
| 151  | CONTIG105 | 218326 | 218685 | 2.95 | 0.00E+00 | transcription_start_site | + | 218250 | 218250 | 255   | 7901 | AN11502 |
| 151  | CONTIG105 | 218326 | 218685 | 2.95 | 0.00E+00 | transcription_start_site | + | 218205 | 218205 | 300   | 7900 | AN11502 |
| 686  | CONTIG105 | 213995 | 214629 | 2.07 | 1.25E-02 | transcription_start_site | + | 218205 | 218205 | -3893 | 7900 | AN11502 |
| 686  | CONTIG105 | 213995 | 214629 | 2.07 | 1.25E-02 | transcription_start_site | + | 218250 | 218250 | -3938 | 7901 | AN11502 |
| 686  | CONTIG105 | 213995 | 214629 | 2.07 | 1.25E-02 | transcription_start_site | + | 218403 | 218403 | -4091 | 7902 | AN11502 |
| 841  | CONTIG105 | 243078 | 243592 | 1.89 | 2.05E-02 | transcription_start_site | + | 242449 | 242449 | 886   | 7904 | AN11503 |
| 841  | CONTIG105 | 243078 | 243592 | 1.89 | 2.05E-02 | transcription_start_site | + | 242348 | 242348 | 987   | 7903 | AN11503 |
| 885  | CONTIG105 | 242043 | 242920 | 1.85 | 2.29E-02 | transcription_start_site | + | 242449 | 242449 | 32    | 7904 | AN11503 |
| 885  | CONTIG105 | 242043 | 242920 | 1.85 | 2.29E-02 | transcription_start_site | + | 242348 | 242348 | 133   | 7903 | AN11503 |
| 1496 | CONTIG106 | 5111   | 5390   | 1.28 | 6.04E-02 | transcription_start_site | - | 1270   | 1270   | -3980 | 7905 | AN11504 |
| 1496 | CONTIG106 | 5111   | 5390   | 1.28 | 6.04E-02 | transcription_start_site | - | 953    | 953    | -4297 | 7906 | AN11504 |
| 1182 | CONTIG107 | 34355  | 34784  | 1.54 | 1.80E-02 | transcription_start_site | - | 31203  | 31203  | -3366 | 7907 | AN11505 |
| 1182 | CONTIG107 | 34355  | 34784  | 1.54 | 1.80E-02 | transcription_start_site | - | 31072  | 31072  | -3497 | 7908 | AN11505 |
| 1998 | CONTIG107 | 34965  | 36360  | 0.94 | 4.39E-02 | transcription_start_site | - | 31203  | 31203  | -4459 | 7907 | AN11505 |
| 1998 | CONTIG107 | 34965  | 36360  | 0.94 | 4.39E-02 | transcription_start_site | - | 31072  | 31072  | -4590 | 7908 | AN11505 |
| 212  | CONTIG108 | 167853 | 169259 | 2.8  | 0.00E+00 | transcription_start_site | - | 170145 | 170145 | 1589  | 7915 | AN11508 |
| 645  | CONTIG108 | 171621 | 172025 | 2.11 | 8.43E-04 | transcription_start_site | - | 170641 | 170641 | -1182 | 7913 | AN11508 |
| 645  | CONTIG108 | 171621 | 172025 | 2.11 | 8.43E-04 | transcription_start_site | - | 170606 | 170606 | -1217 | 7914 | AN11508 |
| 645  | CONTIG108 | 171621 | 172025 | 2.11 | 8.43E-04 | transcription_start_site | - | 170145 | 170145 | -1678 | 7915 | AN11508 |
| 412  | CONTIG109 | 9691   | 10123  | 2.43 | 1.77E-03 | transcription_start_site | - | 5415   | 5415   | -4492 | 7948 | AN11519 |
| 412  | CONTIG109 | 9691   | 10123  | 2.43 | 1.77E-03 | transcription_start_site | - | 4819   | 4819   | -5088 | 7949 | AN11519 |
| 412  | CONTIG109 | 9691   | 10123  | 2.43 | 1.77E-03 | transcription_start_site | - | 4707   | 4707   | -5200 | 7950 | AN11519 |
| 293  | CONTIG109 | 66244  | 66728  | 2.64 | 7.06E-04 | transcription_start_site | - | 64824  | 64824  | -1662 | 7960 | AN11520 |
| 293  | CONTIG109 | 66244  | 66728  | 2.64 | 7.06E-04 | transcription_start_site | - | 64564  | 64564  | -1922 | 7961 | AN11520 |
| 405  | CONTIG110 | 22069  | 22329  | 2.44 | 7.06E-04 | transcription_start_site | - | 22293  | 22293  | 94    | 7965 | AN11522 |



|      |           |        |        |      |          |                          |   |        |        |       |      |         |
|------|-----------|--------|--------|------|----------|--------------------------|---|--------|--------|-------|------|---------|
| 405  | CONTIG110 | 22069  | 22329  | 2.44 | 7.06E-04 | transcription_start_site | - | 22442  | 22442  | 243   | 7964 | AN11522 |
| 466  | CONTIG112 | 24243  | 24587  | 2.36 | 0.00E+00 | transcription_start_site | + | 25652  | 25652  | -1237 | 7973 | AN11525 |
| 466  | CONTIG112 | 24243  | 24587  | 2.36 | 0.00E+00 | transcription_start_site | + | 25792  | 25792  | -1377 | 7974 | AN11525 |
| 466  | CONTIG112 | 24243  | 24587  | 2.36 | 0.00E+00 | transcription_start_site | + | 26095  | 26095  | -1680 | 7975 | AN11525 |
| 2175 | CONTIG112 | 20863  | 21130  | 0.82 | 1.76E-01 | transcription_start_site | + | 25652  | 25652  | -4655 | 7973 | AN11525 |
| 2175 | CONTIG112 | 20863  | 21130  | 0.82 | 1.76E-01 | transcription_start_site | + | 25792  | 25792  | -4795 | 7974 | AN11525 |
| 2175 | CONTIG112 | 20863  | 21130  | 0.82 | 1.76E-01 | transcription_start_site | + | 26095  | 26095  | -5098 | 7975 | AN11525 |
| 1021 | CONTIG112 | 192920 | 193344 | 1.7  | 7.08E-03 | transcription_start_site | + | 193001 | 193001 | 131   | 7977 | AN11526 |
| 1021 | CONTIG112 | 192920 | 193344 | 1.7  | 7.08E-03 | transcription_start_site | + | 192449 | 192449 | 683   | 7976 | AN11526 |
| 2167 | CONTIG112 | 305261 | 305758 | 0.82 | 1.15E-01 | transcription_start_site | - | 301085 | 301085 | -4424 | 7978 | AN11527 |
| 2167 | CONTIG112 | 305261 | 305758 | 0.82 | 1.15E-01 | transcription_start_site | - | 300752 | 300752 | -4757 | 7979 | AN11527 |
| 896  | CONTIG112 | 351166 | 351580 | 1.83 | 4.01E-03 | transcription_start_site | + | 352906 | 352906 | -1533 | 7987 | AN11529 |
| 896  | CONTIG112 | 351166 | 351580 | 1.83 | 4.01E-03 | transcription_start_site | + | 353108 | 353108 | -1735 | 7988 | AN11529 |
| 1069 | CONTIG113 | 123527 | 123876 | 1.65 | 3.70E-02 | transcription_start_site | - | 122198 | 122198 | -1503 | 7998 | AN11531 |
| 1069 | CONTIG113 | 123527 | 123876 | 1.65 | 3.70E-02 | transcription_start_site | - | 121958 | 121958 | -1743 | 7999 | AN11531 |
| 1069 | CONTIG113 | 123527 | 123876 | 1.65 | 3.70E-02 | transcription_start_site | - | 121830 | 121830 | -1871 | 8000 | AN11531 |
| 1105 | CONTIG113 | 121052 | 121401 | 1.61 | 2.07E-02 | transcription_start_site | - | 121830 | 121830 | 603   | 8000 | AN11531 |
| 1105 | CONTIG113 | 121052 | 121401 | 1.61 | 2.07E-02 | transcription_start_site | - | 121958 | 121958 | 731   | 7999 | AN11531 |
| 1105 | CONTIG113 | 121052 | 121401 | 1.61 | 2.07E-02 | transcription_start_site | - | 122198 | 122198 | 971   | 7998 | AN11531 |
| 997  | CONTIG117 | 6458   | 6741   | 1.72 | 2.05E-02 | transcription_start_site | - | 3732   | 3732   | -2867 | 8020 | AN11539 |
| 997  | CONTIG117 | 6458   | 6741   | 1.72 | 2.05E-02 | transcription_start_site | - | 3506   | 3506   | -3093 | 8021 | AN11539 |
| 230  | CONTIG16  | 331659 | 332005 | 2.75 | 1.09E-03 | transcription_start_site | - | 328441 | 328441 | -3391 | 8022 | AN1154  |
| 230  | CONTIG16  | 331659 | 332005 | 2.75 | 1.09E-03 | transcription_start_site | - | 328143 | 328143 | -3689 | 8023 | AN1154  |
| 230  | CONTIG16  | 331659 | 332005 | 2.75 | 1.09E-03 | transcription_start_site | - | 327861 | 327861 | -3971 | 8024 | AN1154  |
| 230  | CONTIG16  | 331659 | 332005 | 2.75 | 1.09E-03 | transcription_start_site | - | 327608 | 327608 | -4224 | 8025 | AN1154  |
| 73   | CONTIG117 | 166963 | 167227 | 3.17 | 0.00E+00 | transcription_start_site | + | 171586 | 171586 | -4491 | 8030 | AN11541 |
| 73   | CONTIG117 | 166963 | 167227 | 3.17 | 0.00E+00 | transcription_start_site | + | 171770 | 171770 | -4675 | 8031 | AN11541 |
| 73   | CONTIG117 | 166963 | 167227 | 3.17 | 0.00E+00 | transcription_start_site | + | 172105 | 172105 | -5010 | 8032 | AN11541 |
| 268  | CONTIG117 | 173120 | 173379 | 2.68 | 2.06E-04 | transcription_start_site | - | 174072 | 174072 | 822   | 8036 | AN11542 |
| 268  | CONTIG117 | 173120 | 173379 | 2.68 | 2.06E-04 | transcription_start_site | - | 174154 | 174154 | 904   | 8035 | AN11542 |
| 268  | CONTIG117 | 173120 | 173379 | 2.68 | 2.06E-04 | transcription_start_site | - | 174222 | 174222 | 972   | 8034 | AN11542 |
| 1172 | CONTIG117 | 227935 | 228739 | 1.56 | 3.34E-02 | transcription_start_site | + | 228930 | 228930 | -593  | 8037 | AN11543 |
| 1172 | CONTIG117 | 227935 | 228739 | 1.56 | 3.34E-02 | transcription_start_site | + | 229088 | 229088 | -751  | 8038 | AN11543 |
| 1172 | CONTIG117 | 227935 | 228739 | 1.56 | 3.34E-02 | transcription_start_site | + | 229341 | 229341 | -1004 | 8039 | AN11543 |
| 2122 | CONTIG119 | 106277 | 106631 | 0.86 | 1.38E-01 | transcription_start_site | + | 108854 | 108854 | -2400 | 8040 | AN11544 |
| 2122 | CONTIG119 | 106277 | 106631 | 0.86 | 1.38E-01 | transcription_start_site | + | 109034 | 109034 | -2580 | 8041 | AN11544 |
| 594  | CONTIG119 | 122568 | 123062 | 2.19 | 2.51E-04 | transcription_start_site | + | 124158 | 124158 | -1343 | 8042 | AN11545 |
| 594  | CONTIG119 | 122568 | 123062 | 2.19 | 2.51E-04 | transcription_start_site | + | 124398 | 124398 | -1583 | 8043 | AN11545 |
| 731  | CONTIG123 | 43132  | 43926  | 2.01 | 3.17E-03 | transcription_start_site | - | 41646  | 41646  | -1883 | 8055 | AN11551 |
| 731  | CONTIG123 | 43132  | 43926  | 2.01 | 3.17E-03 | transcription_start_site | - | 41474  | 41474  | -2055 | 8056 | AN11551 |
| 2015 | CONTIG127 | 56251  | 56530  | 0.93 | 5.36E-02 | transcription_start_site | - | 56869  | 56869  | 478   | 8062 | AN11553 |
| 2015 | CONTIG127 | 56251  | 56530  | 0.93 | 5.36E-02 | transcription_start_site | - | 57223  | 57223  | 832   | 8061 | AN11553 |
| 529  | CONTIG128 | 107561 | 108055 | 2.27 | 0.00E+00 | transcription_start_site | - | 103426 | 103426 | -4382 | 8065 | AN11555 |
| 529  | CONTIG128 | 107561 | 108055 | 2.27 | 0.00E+00 | transcription_start_site | - | 103173 | 103173 | -4635 | 8066 | AN11555 |
| 529  | CONTIG128 | 107561 | 108055 | 2.27 | 0.00E+00 | transcription_start_site | - | 103015 | 103015 | -4793 | 8067 | AN11555 |
| 2123 | CONTIG128 | 102076 | 102453 | 0.86 | 1.38E-01 | transcription_start_site | - | 103015 | 103015 | 750   | 8067 | AN11555 |
| 2123 | CONTIG128 | 102076 | 102453 | 0.86 | 1.38E-01 | transcription_start_site | - | 103173 | 103173 | 908   | 8066 | AN11555 |
| 2123 | CONTIG128 | 102076 | 102453 | 0.86 | 1.38E-01 | transcription_start_site | - | 103426 | 103426 | 1161  | 8065 | AN11555 |
| 230  | CONTIG16  | 331659 | 332005 | 2.75 | 1.09E-03 | transcription_start_site | + | 332009 | 332009 | -177  | 8076 | AN1156  |
| 230  | CONTIG16  | 331659 | 332005 | 2.75 | 1.09E-03 | transcription_start_site | + | 332197 | 332197 | -365  | 8077 | AN1156  |
| 230  | CONTIG16  | 331659 | 332005 | 2.75 | 1.09E-03 | transcription_start_site | + | 332882 | 332882 | -1050 | 8078 | AN1156  |
| 424  | CONTIG129 | 95028  | 95377  | 2.42 | 1.62E-03 | transcription_start_site | + | 95919  | 95919  | -716  | 8091 | AN11563 |
| 655  | CONTIG129 | 91053  | 91402  | 2.1  | 6.24E-03 | transcription_start_site | + | 95919  | 95919  | -4691 | 8091 | AN11563 |
| 390  | CONTIG129 | 184736 | 185170 | 2.46 | 1.45E-03 | transcription_start_site | + | 184835 | 184835 | 118   | 8093 | AN11564 |
| 390  | CONTIG129 | 184736 | 185170 | 2.46 | 1.45E-03 | transcription_start_site | + | 184585 | 184585 | 368   | 8092 | AN11564 |
| 1554 | CONTIG129 | 181816 | 182245 | 1.23 | 4.73E-02 | transcription_start_site | + | 184585 | 184585 | -2554 | 8092 | AN11564 |
| 1554 | CONTIG129 | 181816 | 182245 | 1.23 | 4.73E-02 | transcription_start_site | + | 184835 | 184835 | -2804 | 8093 | AN11564 |

|      |           |        |        |      |          |                          |   |        |        |       |      |         |
|------|-----------|--------|--------|------|----------|--------------------------|---|--------|--------|-------|------|---------|
| 568  | CONTIG16  | 343129 | 343714 | 2.23 | 3.81E-03 | transcription_start_site | - | 342583 | 342583 | -838  | 8107 | AN1157  |
| 568  | CONTIG16  | 343129 | 343714 | 2.23 | 3.81E-03 | transcription_start_site | - | 341985 | 341985 | -1436 | 8108 | AN1157  |
| 568  | CONTIG16  | 343129 | 343714 | 2.23 | 3.81E-03 | transcription_start_site | - | 341711 | 341711 | -1710 | 8109 | AN1157  |
| 203  | CONTIG130 | 125035 | 125319 | 2.81 | 0.00E+00 | transcription_start_site | + | 126429 | 126429 | -1252 | 8110 | AN11570 |
| 203  | CONTIG130 | 125035 | 125319 | 2.81 | 0.00E+00 | transcription_start_site | + | 126565 | 126565 | -1388 | 8111 | AN11570 |
| 1037 | CONTIG131 | 99845  | 100254 | 1.68 | 7.70E-03 | transcription_start_site | - | 95459  | 95459  | -4590 | 8112 | AN11571 |
| 1037 | CONTIG131 | 99845  | 100254 | 1.68 | 7.70E-03 | transcription_start_site | - | 95337  | 95337  | -4712 | 8113 | AN11571 |
| 2368 | CONTIG133 | 31732  | 32537  | 0.45 | 1.54E-01 | transcription_start_site | + | 35140  | 35140  | -3005 | 8118 | AN11574 |
| 2368 | CONTIG133 | 31732  | 32537  | 0.45 | 1.54E-01 | transcription_start_site | + | 35295  | 35295  | -3160 | 8119 | AN11574 |
| 2368 | CONTIG133 | 31732  | 32537  | 0.45 | 1.54E-01 | transcription_start_site | + | 35509  | 35509  | -3374 | 8120 | AN11574 |
| 568  | CONTIG16  | 343129 | 343714 | 2.23 | 3.81E-03 | transcription_start_site | + | 345593 | 345593 | -2171 | 8137 | AN1158  |
| 568  | CONTIG16  | 343129 | 343714 | 2.23 | 3.81E-03 | transcription_start_site | + | 345762 | 345762 | -2340 | 8138 | AN1158  |
| 568  | CONTIG16  | 343129 | 343714 | 2.23 | 3.81E-03 | transcription_start_site | + | 348447 | 348447 | -5025 | 8139 | AN1158  |
| 1395 | CONTIG134 | 77110  | 77617  | 1.35 | 7.06E-04 | transcription_start_site | - | 73238  | 73238  | -4125 | 8144 | AN11581 |
| 886  | CONTIG140 | 19887  | 20236  | 1.84 | 3.37E-03 | transcription_start_site | + | 21720  | 21720  | -1658 | 8160 | AN11588 |
| 886  | CONTIG140 | 19887  | 20236  | 1.84 | 3.37E-03 | transcription_start_site | + | 21873  | 21873  | -1811 | 8161 | AN11588 |
| 1449 | CONTIG16  | 353794 | 354128 | 1.31 | 9.60E-02 | transcription_start_site | - | 352522 | 352522 | -1439 | 8164 | AN1159  |
| 1449 | CONTIG16  | 353794 | 354128 | 1.31 | 9.60E-02 | transcription_start_site | - | 352170 | 352170 | -1791 | 8165 | AN1159  |
| 1449 | CONTIG16  | 353794 | 354128 | 1.31 | 9.60E-02 | transcription_start_site | - | 351777 | 351777 | -2184 | 8166 | AN1159  |
| 1449 | CONTIG16  | 353794 | 354128 | 1.31 | 9.60E-02 | transcription_start_site | - | 351078 | 351078 | -2883 | 8167 | AN1159  |
| 1813 | CONTIG141 | 58502  | 58929  | 1.06 | 5.36E-02 | transcription_start_site | + | 58947  | 58947  | -231  | 8168 | AN11590 |
| 1813 | CONTIG141 | 58502  | 58929  | 1.06 | 5.36E-02 | transcription_start_site | + | 59039  | 59039  | -323  | 8169 | AN11590 |
| 1391 | CONTIG142 | 19581  | 19940  | 1.36 | 3.70E-02 | transcription_start_site | + | 24825  | 24825  | -5064 | 8183 | AN11597 |
| 2353 | CONTIG142 | 24621  | 25567  | 0.54 | 1.75E-01 | transcription_start_site | + | 25101  | 25101  | -7    | 8184 | AN11597 |
| 2353 | CONTIG142 | 24621  | 25567  | 0.54 | 1.75E-01 | transcription_start_site | + | 24825  | 24825  | 269   | 8183 | AN11597 |
| 85   | CONTIG145 | 39981  | 40552  | 3.12 | 0.00E+00 | transcription_start_site | - | 37459  | 37459  | -2807 | 8185 | AN11598 |
| 85   | CONTIG145 | 39981  | 40552  | 3.12 | 0.00E+00 | transcription_start_site | - | 37339  | 37339  | -2927 | 8186 | AN11598 |
| 85   | CONTIG145 | 39981  | 40552  | 3.12 | 0.00E+00 | transcription_start_site | - | 37001  | 37001  | -3265 | 8187 | AN11598 |
| 1449 | CONTIG16  | 353794 | 354128 | 1.31 | 9.60E-02 | transcription_start_site | - | 353498 | 353498 | -463  | 8191 | AN1160  |
| 1449 | CONTIG16  | 353794 | 354128 | 1.31 | 9.60E-02 | transcription_start_site | - | 353374 | 353374 | -587  | 8192 | AN1160  |
| 2372 | CONTIG152 | 25893  | 26466  | 0.42 | 1.76E-01 | transcription_start_site | - | 21714  | 21714  | -4465 | 8200 | AN11603 |
| 2372 | CONTIG152 | 25893  | 26466  | 0.42 | 1.76E-01 | transcription_start_site | - | 21435  | 21435  | -4744 | 8201 | AN11603 |
| 2259 | CONTIG152 | 26858  | 27137  | 0.72 | 2.05E-02 | transcription_start_site | + | 31546  | 31546  | -4548 | 8202 | AN11604 |
| 2259 | CONTIG152 | 26858  | 27137  | 0.72 | 2.05E-02 | transcription_start_site | + | 31630  | 31630  | -4632 | 8203 | AN11604 |
| 2259 | CONTIG152 | 26858  | 27137  | 0.72 | 2.05E-02 | transcription_start_site | + | 31890  | 31890  | -4892 | 8204 | AN11605 |
| 1632 | CONTIG153 | 81903  | 82342  | 1.18 | 3.01E-02 | transcription_start_site | + | 82432  | 82432  | -309  | 8209 | AN11607 |
| 1632 | CONTIG153 | 81903  | 82342  | 1.18 | 3.01E-02 | transcription_start_site | + | 82686  | 82686  | -563  | 8210 | AN11607 |
| 1812 | CONTIG153 | 131703 | 131992 | 1.06 | 4.78E-02 | transcription_start_site | - | 129494 | 129494 | -2353 | 8218 | AN11610 |
| 1812 | CONTIG153 | 131703 | 131992 | 1.06 | 4.78E-02 | transcription_start_site | - | 129329 | 129329 | -2518 | 8219 | AN11610 |
| 1812 | CONTIG153 | 131703 | 131992 | 1.06 | 4.78E-02 | transcription_start_site | - | 129237 | 129237 | -2610 | 8220 | AN11610 |
| 2225 | CONTIG153 | 158570 | 158844 | 0.77 | 1.54E-01 | transcription_start_site | - | 155746 | 155746 | -2961 | 8223 | AN11612 |
| 2225 | CONTIG153 | 158570 | 158844 | 0.77 | 1.54E-01 | transcription_start_site | - | 155548 | 155548 | -3159 | 8224 | AN11612 |
| 2225 | CONTIG153 | 158570 | 158844 | 0.77 | 1.54E-01 | transcription_start_site | - | 155448 | 155448 | -3259 | 8225 | AN11612 |
| 2225 | CONTIG153 | 158570 | 158844 | 0.77 | 1.54E-01 | transcription_start_site | - | 155347 | 155347 | -3360 | 8226 | AN11612 |
| 943  | CONTIG153 | 339908 | 340409 | 1.77 | 1.77E-03 | transcription_start_site | + | 344755 | 344755 | -4596 | 8231 | AN11615 |
| 943  | CONTIG153 | 339908 | 340409 | 1.77 | 1.77E-03 | transcription_start_site | + | 344908 | 344908 | -4749 | 8232 | AN11615 |
| 830  | CONTIG153 | 359259 | 360427 | 1.89 | 0.00E+00 | transcription_start_site | + | 362984 | 362984 | -3141 | 8233 | AN11616 |
| 830  | CONTIG153 | 359259 | 360427 | 1.89 | 0.00E+00 | transcription_start_site | + | 363753 | 363753 | -3910 | 8234 | AN11616 |
| 2226 | CONTIG153 | 362557 | 362844 | 0.77 | 1.54E-01 | transcription_start_site | + | 362984 | 362984 | -283  | 8233 | AN11616 |
| 2226 | CONTIG153 | 362557 | 362844 | 0.77 | 1.54E-01 | transcription_start_site | + | 363753 | 363753 | -1052 | 8234 | AN11616 |
| 587  | CONTIG154 | 3471   | 3743   | 2.21 | 1.25E-02 | transcription_start_site | - | 2063   | 2063   | -1544 | 8235 | AN11617 |
| 587  | CONTIG154 | 3471   | 3743   | 2.21 | 1.25E-02 | transcription_start_site | - | 1913   | 1913   | -1694 | 8236 | AN11617 |
| 1442 | CONTIG157 | 5784   | 6128   | 1.31 | 2.63E-02 | transcription_start_site | + | 5937   | 5937   | 19    | 8240 | AN11619 |
| 1442 | CONTIG157 | 5784   | 6128   | 1.31 | 2.63E-02 | transcription_start_site | + | 5996   | 5996   | -40   | 8241 | AN11619 |
| 279  | CONTIG157 | 39009  | 39294  | 2.66 | 0.00E+00 | transcription_start_site | - | 37909  | 37909  | -1242 | 8250 | AN11621 |
| 279  | CONTIG157 | 39009  | 39294  | 2.66 | 0.00E+00 | transcription_start_site | - | 37717  | 37717  | -1434 | 8251 | AN11621 |
| 279  | CONTIG157 | 39009  | 39294  | 2.66 | 0.00E+00 | transcription_start_site | - | 37424  | 37424  | -1727 | 8252 | AN11621 |

|      |           |        |        |      |          |                          |   |        |        |       |      |         |
|------|-----------|--------|--------|------|----------|--------------------------|---|--------|--------|-------|------|---------|
| 2155 | CONTIG157 | 120004 | 120362 | 0.83 | 1.54E-01 | transcription_start_site | - | 119995 | 119995 | -188  | 8257 | AN11623 |
| 2155 | CONTIG157 | 120004 | 120362 | 0.83 | 1.54E-01 | transcription_start_site | - | 119856 | 119856 | -327  | 8258 | AN11623 |
| 2155 | CONTIG157 | 120004 | 120362 | 0.83 | 1.54E-01 | transcription_start_site | - | 119653 | 119653 | -530  | 8259 | AN11623 |
| 355  | CONTIG158 | 86344  | 87058  | 2.53 | 2.65E-03 | transcription_start_site | - | 86670  | 86670  | -31   | 8261 | AN11624 |
| 355  | CONTIG158 | 86344  | 87058  | 2.53 | 2.65E-03 | transcription_start_site | - | 86774  | 86774  | 73    | 8260 | AN11624 |
| 355  | CONTIG158 | 86344  | 87058  | 2.53 | 2.65E-03 | transcription_start_site | - | 86439  | 86439  | -262  | 8262 | AN11624 |
| 355  | CONTIG158 | 86344  | 87058  | 2.53 | 2.65E-03 | transcription_start_site | + | 87039  | 87039  | -338  | 8263 | AN11625 |
| 355  | CONTIG158 | 86344  | 87058  | 2.53 | 2.65E-03 | transcription_start_site | + | 87246  | 87246  | -545  | 8264 | AN11625 |
| 355  | CONTIG158 | 86344  | 87058  | 2.53 | 2.65E-03 | transcription_start_site | + | 87527  | 87527  | -826  | 8265 | AN11625 |
| 1449 | CONTIG16  | 353794 | 354128 | 1.31 | 9.60E-02 | transcription_start_site | + | 358205 | 358205 | -4244 | 8273 | AN1163  |
| 1000 | CONTIG161 | 233106 | 233451 | 1.72 | 6.04E-02 | transcription_start_site | + | 232425 | 232425 | 853   | 8277 | AN11631 |
| 1000 | CONTIG161 | 233106 | 233451 | 1.72 | 6.04E-02 | transcription_start_site | + | 232250 | 232250 | 1028  | 8276 | AN11631 |
| 2276 | CONTIG163 | 55596  | 55865  | 0.7  | 1.08E-01 | transcription_start_site | + | 57252  | 57252  | -1521 | 8278 | AN11632 |
| 2276 | CONTIG163 | 55596  | 55865  | 0.7  | 1.08E-01 | transcription_start_site | + | 57551  | 57551  | -1820 | 8279 | AN11632 |
| 247  | CONTIG164 | 48230  | 48659  | 2.71 | 0.00E+00 | transcription_start_site | - | 47259  | 47259  | -1185 | 8280 | AN11633 |
| 247  | CONTIG164 | 48230  | 48659  | 2.71 | 0.00E+00 | transcription_start_site | - | 46996  | 46996  | -1448 | 8281 | AN11633 |
| 247  | CONTIG164 | 48230  | 48659  | 2.71 | 0.00E+00 | transcription_start_site | - | 46824  | 46824  | -1620 | 8282 | AN11633 |
| 247  | CONTIG164 | 48230  | 48659  | 2.71 | 0.00E+00 | transcription_start_site | - | 46694  | 46694  | -1750 | 8283 | AN11633 |
| 753  | CONTIG168 | 6451   | 6875   | 1.99 | 1.35E-03 | transcription_start_site | - | 3517   | 3517   | -3146 | 8291 | AN11638 |
| 753  | CONTIG168 | 6451   | 6875   | 1.99 | 1.35E-03 | transcription_start_site | - | 3319   | 3319   | -3344 | 8292 | AN11638 |
| 753  | CONTIG168 | 6451   | 6875   | 1.99 | 1.35E-03 | transcription_start_site | - | 3037   | 3037   | -3626 | 8293 | AN11638 |
| 1710 | CONTIG168 | 65179  | 65468  | 1.13 | 6.04E-02 | transcription_start_site | - | 61563  | 61563  | -3760 | 8294 | AN11639 |
| 1710 | CONTIG168 | 65179  | 65468  | 1.13 | 6.04E-02 | transcription_start_site | - | 61420  | 61420  | -3903 | 8295 | AN11639 |
| 115  | CONTIG169 | 238070 | 238404 | 3.05 | 0.00E+00 | transcription_start_site | - | 238319 | 238319 | 82    | 8303 | AN11641 |
| 115  | CONTIG169 | 238070 | 238404 | 3.05 | 0.00E+00 | transcription_start_site | - | 238614 | 238614 | 377   | 8302 | AN11641 |
| 1676 | CONTIG169 | 237003 | 237579 | 1.15 | 6.04E-02 | transcription_start_site | - | 238319 | 238319 | 1028  | 8303 | AN11641 |
| 2265 | CONTIG169 | 239716 | 240876 | 0.71 | 6.32E-02 | transcription_start_site | - | 238614 | 238614 | -1682 | 8302 | AN11641 |
| 2265 | CONTIG169 | 239716 | 240876 | 0.71 | 6.32E-02 | transcription_start_site | - | 238319 | 238319 | -1977 | 8303 | AN11641 |
| 2063 | CONTIG172 | 6536   | 7492   | 0.9  | 2.89E-02 | transcription_start_site | + | 9833   | 9833   | -2819 | 8315 | AN11646 |
| 2063 | CONTIG172 | 6536   | 7492   | 0.9  | 2.89E-02 | transcription_start_site | + | 10014  | 10014  | -3000 | 8316 | AN11646 |
| 221  | CONTIG172 | 84095  | 84961  | 2.78 | 0.00E+00 | transcription_start_site | - | 83534  | 83534  | -994  | 8322 | AN11649 |
| 221  | CONTIG172 | 84095  | 84961  | 2.78 | 0.00E+00 | transcription_start_site | - | 83489  | 83489  | -1039 | 8323 | AN11649 |
| 2316 | CONTIG172 | 81020  | 82569  | 0.65 | 1.64E-01 | transcription_start_site | - | 83489  | 83489  | 1694  | 8323 | AN11649 |
| 2316 | CONTIG172 | 81020  | 82569  | 0.65 | 1.64E-01 | transcription_start_site | - | 83534  | 83534  | 1739  | 8322 | AN11649 |
| 221  | CONTIG172 | 84095  | 84961  | 2.78 | 0.00E+00 | transcription_start_site | + | 84506  | 84506  | 22    | 8327 | AN11650 |
| 221  | CONTIG172 | 84095  | 84961  | 2.78 | 0.00E+00 | transcription_start_site | + | 84625  | 84625  | -97   | 8328 | AN11650 |
| 2316 | CONTIG172 | 81020  | 82569  | 0.65 | 1.64E-01 | transcription_start_site | + | 84506  | 84506  | -2711 | 8327 | AN11650 |
| 2316 | CONTIG172 | 81020  | 82569  | 0.65 | 1.64E-01 | transcription_start_site | + | 84625  | 84625  | -2830 | 8328 | AN11650 |
| 221  | CONTIG172 | 84095  | 84961  | 2.78 | 0.00E+00 | transcription_start_site | - | 85559  | 85559  | 1031  | 8330 | AN11651 |
| 221  | CONTIG172 | 84095  | 84961  | 2.78 | 0.00E+00 | transcription_start_site | - | 85947  | 85947  | 1419  | 8329 | AN11651 |
| 1785 | CONTIG172 | 343354 | 343713 | 1.08 | 5.36E-02 | transcription_start_site | + | 347030 | 347030 | -3496 | 8345 | AN11657 |
| 1785 | CONTIG172 | 343354 | 343713 | 1.08 | 5.36E-02 | transcription_start_site | + | 347197 | 347197 | -3663 | 8346 | AN11657 |
| 2361 | CONTIG174 | 16521  | 17620  | 0.49 | 8.54E-02 | transcription_start_site | + | 19974  | 19974  | -2903 | 8367 | AN11662 |
| 2361 | CONTIG174 | 16521  | 17620  | 0.49 | 8.54E-02 | transcription_start_site | + | 20181  | 20181  | -3110 | 8368 | AN11662 |
| 2361 | CONTIG174 | 16521  | 17620  | 0.49 | 8.54E-02 | transcription_start_site | + | 20298  | 20298  | -3227 | 8369 | AN11662 |
| 2361 | CONTIG174 | 16521  | 17620  | 0.49 | 8.54E-02 | transcription_start_site | + | 20484  | 20484  | -3413 | 8370 | AN11662 |
| 2361 | CONTIG174 | 16521  | 17620  | 0.49 | 8.54E-02 | transcription_start_site | + | 20833  | 20833  | -3762 | 8371 | AN11662 |
| 2361 | CONTIG174 | 16521  | 17620  | 0.49 | 8.54E-02 | transcription_start_site | + | 20901  | 20901  | -3830 | 8372 | AN11662 |
| 2361 | CONTIG174 | 16521  | 17620  | 0.49 | 8.54E-02 | transcription_start_site | + | 21053  | 21053  | -3982 | 8373 | AN11662 |
| 2361 | CONTIG174 | 16521  | 17620  | 0.49 | 8.54E-02 | transcription_start_site | + | 21190  | 21190  | -4119 | 8374 | AN11662 |
| 2381 | CONTIG184 | 1      | 1187   | 0.36 | 1.07E-01 | transcription_start_site | - | 605    | 605    | 11    | 8385 | AN11666 |
| 2381 | CONTIG184 | 1      | 1187   | 0.36 | 1.07E-01 | transcription_start_site | - | 558    | 558    | -36   | 8386 | AN11666 |
| 2381 | CONTIG184 | 1      | 1187   | 0.36 | 1.07E-01 | transcription_start_site | - | 703    | 703    | 109   | 8384 | AN11666 |
| 2381 | CONTIG184 | 1      | 1187   | 0.36 | 1.07E-01 | transcription_start_site | - | 813    | 813    | 219   | 8383 | AN11666 |
| 465  | CONTIG187 | 6992   | 7416   | 2.37 | 3.01E-02 | transcription_start_site | - | 6561   | 6561   | -643  | 8391 | AN11668 |
| 465  | CONTIG187 | 6992   | 7416   | 2.37 | 3.01E-02 | transcription_start_site | - | 6387   | 6387   | -817  | 8392 | AN11668 |
| 842  | CONTIG187 | 7742   | 8381   | 1.89 | 7.66E-02 | transcription_start_site | - | 6561   | 6561   | -1500 | 8391 | AN11668 |

|      |           |        |        |      |          |                          |   |        |        |       |      |         |
|------|-----------|--------|--------|------|----------|--------------------------|---|--------|--------|-------|------|---------|
| 842  | CONTIG187 | 7742   | 8381   | 1.89 | 7.66E-02 | transcription_start_site | - | 6387   | 6387   | -1674 | 8392 | AN11668 |
| 1190 | CONTIG189 | 4951   | 5305   | 1.53 | 1.06E-02 | transcription_start_site | - | 3444   | 3444   | -1684 | 8393 | AN11669 |
| 1190 | CONTIG189 | 4951   | 5305   | 1.53 | 1.06E-02 | transcription_start_site | - | 3150   | 3150   | -1978 | 8394 | AN11669 |
| 2342 | CONTIG223 | 4276   | 4775   | 0.59 | 8.54E-02 | transcription_start_site | - | 1539   | 1539   | -2986 | 8408 | AN11674 |
| 2342 | CONTIG223 | 4276   | 4775   | 0.59 | 8.54E-02 | transcription_start_site | - | 1309   | 1309   | -3216 | 8409 | AN11674 |
| 2380 | CONTIG240 | 751    | 3662   | 0.38 | 0.00E+00 | transcription_start_site | - | 2117   | 2117   | -89   | 8410 | AN11675 |
| 2380 | CONTIG240 | 751    | 3662   | 0.38 | 0.00E+00 | transcription_start_site | - | 1917   | 1917   | -289  | 8411 | AN11675 |
| 2380 | CONTIG240 | 751    | 3662   | 0.38 | 0.00E+00 | transcription_start_site | - | 1850   | 1850   | -356  | 8412 | AN11675 |
| 2380 | CONTIG240 | 751    | 3662   | 0.38 | 0.00E+00 | transcription_start_site | - | 3270   | 3270   | 1063  | 8414 | AN11676 |
| 2380 | CONTIG240 | 751    | 3662   | 0.38 | 0.00E+00 | transcription_start_site | - | 3545   | 3545   | 1338  | 8413 | AN11676 |
| 1403 | CONTIG16  | 379362 | 379649 | 1.35 | 8.63E-02 | transcription_start_site | + | 378397 | 378397 | 1108  | 8421 | AN1169  |
| 1403 | CONTIG16  | 379362 | 379649 | 1.35 | 8.63E-02 | transcription_start_site | - | 380641 | 380641 | 1135  | 8425 | AN1170  |
| 1578 | CONTIG16  | 389101 | 389460 | 1.22 | 1.22E-01 | transcription_start_site | - | 385968 | 385968 | -3312 | 8426 | AN1171  |
| 1578 | CONTIG16  | 389101 | 389460 | 1.22 | 1.22E-01 | transcription_start_site | - | 385707 | 385707 | -3573 | 8427 | AN1171  |
| 1578 | CONTIG16  | 389101 | 389460 | 1.22 | 1.22E-01 | transcription_start_site | - | 385021 | 385021 | -4259 | 8428 | AN1171  |
| 1578 | CONTIG16  | 389101 | 389460 | 1.22 | 1.22E-01 | transcription_start_site | + | 390102 | 390102 | -821  | 8431 | AN1173  |
| 1578 | CONTIG16  | 389101 | 389460 | 1.22 | 1.22E-01 | transcription_start_site | + | 390168 | 390168 | -887  | 8432 | AN1173  |
| 1578 | CONTIG16  | 389101 | 389460 | 1.22 | 1.22E-01 | transcription_start_site | + | 391173 | 391173 | -1892 | 8433 | AN1173  |
| 735  | CONTIG16  | 397126 | 397925 | 2.01 | 5.38E-03 | transcription_start_site | - | 396986 | 396986 | -539  | 8434 | AN1174  |
| 735  | CONTIG16  | 397126 | 397925 | 2.01 | 5.38E-03 | transcription_start_site | - | 395885 | 395885 | -1640 | 8435 | AN1174  |
| 735  | CONTIG16  | 397126 | 397925 | 2.01 | 5.38E-03 | transcription_start_site | - | 395742 | 395742 | -1783 | 8436 | AN1174  |
| 735  | CONTIG16  | 397126 | 397925 | 2.01 | 5.38E-03 | transcription_start_site | - | 395204 | 395204 | -2321 | 8437 | AN1174  |
| 735  | CONTIG16  | 397126 | 397925 | 2.01 | 5.38E-03 | transcription_start_site | - | 395076 | 395076 | -2449 | 8438 | AN1174  |
| 735  | CONTIG16  | 397126 | 397925 | 2.01 | 5.38E-03 | transcription_start_site | - | 394969 | 394969 | -2556 | 8439 | AN1174  |
| 735  | CONTIG16  | 397126 | 397925 | 2.01 | 5.38E-03 | transcription_start_site | - | 394733 | 394733 | -2792 | 8440 | AN1174  |
| 735  | CONTIG16  | 397126 | 397925 | 2.01 | 5.38E-03 | transcription_start_site | - | 393257 | 393257 | -4268 | 8441 | AN1174  |
| 735  | CONTIG16  | 397126 | 397925 | 2.01 | 5.38E-03 | transcription_start_site | - | 392802 | 392802 | -4723 | 8442 | AN1174  |
| 735  | CONTIG16  | 397126 | 397925 | 2.01 | 5.38E-03 | transcription_start_site | + | 398927 | 398927 | -1401 | 8444 | AN1175  |
| 735  | CONTIG16  | 397126 | 397925 | 2.01 | 5.38E-03 | transcription_start_site | + | 399026 | 399026 | -1500 | 8445 | AN1175  |
| 735  | CONTIG16  | 397126 | 397925 | 2.01 | 5.38E-03 | transcription_start_site | + | 399195 | 399195 | -1669 | 8446 | AN1175  |
| 1579 | CONTIG16  | 407268 | 407542 | 1.22 | 1.22E-01 | transcription_start_site | - | 405791 | 405791 | -1614 | 8450 | AN1177  |
| 1579 | CONTIG16  | 407268 | 407542 | 1.22 | 1.22E-01 | transcription_start_site | - | 405421 | 405421 | -1984 | 8451 | AN1177  |
| 1579 | CONTIG16  | 407268 | 407542 | 1.22 | 1.22E-01 | transcription_start_site | - | 404951 | 404951 | -2454 | 8452 | AN1177  |
| 1579 | CONTIG16  | 407268 | 407542 | 1.22 | 1.22E-01 | transcription_start_site | - | 404514 | 404514 | -2891 | 8453 | AN1177  |
| 1579 | CONTIG16  | 407268 | 407542 | 1.22 | 1.22E-01 | transcription_start_site | - | 402864 | 402864 | -4541 | 8454 | AN1177  |
| 1579 | CONTIG16  | 407268 | 407542 | 1.22 | 1.22E-01 | transcription_start_site | + | 406983 | 406983 | 422   | 8461 | AN1178  |
| 1579 | CONTIG16  | 407268 | 407542 | 1.22 | 1.22E-01 | transcription_start_site | + | 406802 | 406802 | 603   | 8460 | AN1178  |
| 1579 | CONTIG16  | 407268 | 407542 | 1.22 | 1.22E-01 | transcription_start_site | + | 406664 | 406664 | 741   | 8459 | AN1178  |
| 1579 | CONTIG16  | 407268 | 407542 | 1.22 | 1.22E-01 | transcription_start_site | + | 406548 | 406548 | 857   | 8458 | AN1178  |
| 1579 | CONTIG16  | 407268 | 407542 | 1.22 | 1.22E-01 | transcription_start_site | + | 406397 | 406397 | 1008  | 8457 | AN1178  |
| 1579 | CONTIG16  | 407268 | 407542 | 1.22 | 1.22E-01 | transcription_start_site | + | 406308 | 406308 | 1097  | 8456 | AN1178  |
| 1579 | CONTIG16  | 407268 | 407542 | 1.22 | 1.22E-01 | transcription_start_site | + | 407543 | 407543 | -138  | 8462 | AN1179  |
| 1579 | CONTIG16  | 407268 | 407542 | 1.22 | 1.22E-01 | transcription_start_site | + | 407993 | 407993 | -588  | 8463 | AN1179  |
| 1579 | CONTIG16  | 407268 | 407542 | 1.22 | 1.22E-01 | transcription_start_site | + | 408220 | 408220 | -815  | 8464 | AN1179  |
| 1579 | CONTIG16  | 407268 | 407542 | 1.22 | 1.22E-01 | transcription_start_site | + | 408628 | 408628 | -1223 | 8465 | AN1179  |
| 1646 | CONTIG16  | 431410 | 431759 | 1.18 | 1.38E-01 | transcription_start_site | - | 426475 | 426475 | -5109 | 8472 | AN1182  |
| 1646 | CONTIG16  | 431410 | 431759 | 1.18 | 1.38E-01 | transcription_start_site | + | 431161 | 431161 | 423   | 8486 | AN1183  |
| 1646 | CONTIG16  | 431410 | 431759 | 1.18 | 1.38E-01 | transcription_start_site | + | 430938 | 430938 | 646   | 8485 | AN1183  |
| 1646 | CONTIG16  | 431410 | 431759 | 1.18 | 1.38E-01 | transcription_start_site | + | 433878 | 433878 | -2293 | 8488 | AN1185  |
| 1646 | CONTIG16  | 431410 | 431759 | 1.18 | 1.38E-01 | transcription_start_site | + | 434079 | 434079 | -2494 | 8489 | AN1185  |
| 1646 | CONTIG16  | 431410 | 431759 | 1.18 | 1.38E-01 | transcription_start_site | + | 435148 | 435148 | -3563 | 8490 | AN1185  |
| 498  | CONTIG16  | 449566 | 449921 | 2.32 | 6.24E-03 | transcription_start_site | - | 449162 | 449162 | -581  | 8504 | AN1189  |
| 498  | CONTIG16  | 449566 | 449921 | 2.32 | 6.24E-03 | transcription_start_site | - | 446094 | 446094 | -3649 | 8505 | AN1189  |
| 498  | CONTIG16  | 449566 | 449921 | 2.32 | 6.24E-03 | transcription_start_site | - | 445906 | 445906 | -3837 | 8506 | AN1189  |
| 498  | CONTIG16  | 449566 | 449921 | 2.32 | 6.24E-03 | transcription_start_site | - | 445600 | 445600 | -4143 | 8507 | AN1189  |
| 1902 | CONTIG17  | 7661   | 8308   | 1    | 5.43E-02 | transcription_start_site | - | 4608   | 4608   | -3376 | 8508 | AN1190  |
| 1902 | CONTIG17  | 7661   | 8308   | 1    | 5.43E-02 | transcription_start_site | - | 4476   | 4476   | -3508 | 8509 | AN1190  |

|      |          |       |       |      |          |                          |   |       |       |       |      |        |
|------|----------|-------|-------|------|----------|--------------------------|---|-------|-------|-------|------|--------|
| 1902 | CONTIG17 | 7661  | 8308  | 1    | 5.43E-02 | transcription_start_site | - | 4205  | 4205  | -3779 | 8510 | AN1190 |
| 2083 | CONTIG17 | 4656  | 5554  | 0.89 | 9.04E-02 | transcription_start_site | - | 4608  | 4608  | -497  | 8508 | AN1190 |
| 2083 | CONTIG17 | 4656  | 5554  | 0.89 | 9.04E-02 | transcription_start_site | - | 4476  | 4476  | -629  | 8509 | AN1190 |
| 2083 | CONTIG17 | 4656  | 5554  | 0.89 | 9.04E-02 | transcription_start_site | - | 4205  | 4205  | -900  | 8510 | AN1190 |
| 2083 | CONTIG17 | 4656  | 5554  | 0.89 | 9.04E-02 | transcription_start_site | - | 2108  | 2108  | -2997 | 8511 | AN1190 |
| 2083 | CONTIG17 | 4656  | 5554  | 0.89 | 9.04E-02 | transcription_start_site | - | 1586  | 1586  | -3519 | 8512 | AN1190 |
| 2083 | CONTIG17 | 4656  | 5554  | 0.89 | 9.04E-02 | transcription_start_site | + | 6062  | 6062  | -957  | 8513 | AN1191 |
| 2083 | CONTIG17 | 4656  | 5554  | 0.89 | 9.04E-02 | transcription_start_site | + | 6382  | 6382  | -1277 | 8514 | AN1191 |
| 1902 | CONTIG17 | 7661  | 8308  | 1    | 5.43E-02 | transcription_start_site | - | 7757  | 7757  | -227  | 8515 | AN1192 |
| 1902 | CONTIG17 | 7661  | 8308  | 1    | 5.43E-02 | transcription_start_site | - | 7560  | 7560  | -424  | 8516 | AN1192 |
| 1902 | CONTIG17 | 7661  | 8308  | 1    | 5.43E-02 | transcription_start_site | + | 8657  | 8657  | -672  | 8517 | AN1193 |
| 1902 | CONTIG17 | 7661  | 8308  | 1    | 5.43E-02 | transcription_start_site | + | 8929  | 8929  | -944  | 8518 | AN1193 |
| 1902 | CONTIG17 | 7661  | 8308  | 1    | 5.43E-02 | transcription_start_site | + | 9092  | 9092  | -1107 | 8519 | AN1193 |
| 1902 | CONTIG17 | 7661  | 8308  | 1    | 5.43E-02 | transcription_start_site | + | 9288  | 9288  | -1303 | 8520 | AN1193 |
| 1902 | CONTIG17 | 7661  | 8308  | 1    | 5.43E-02 | transcription_start_site | + | 9715  | 9715  | -1730 | 8521 | AN1193 |
| 1902 | CONTIG17 | 7661  | 8308  | 1    | 5.43E-02 | transcription_start_site | + | 9959  | 9959  | -1974 | 8522 | AN1193 |
| 1902 | CONTIG17 | 7661  | 8308  | 1    | 5.43E-02 | transcription_start_site | + | 10640 | 10640 | -2655 | 8523 | AN1193 |
| 1902 | CONTIG17 | 7661  | 8308  | 1    | 5.43E-02 | transcription_start_site | + | 10728 | 10728 | -2743 | 8524 | AN1193 |
| 1902 | CONTIG17 | 7661  | 8308  | 1    | 5.43E-02 | transcription_start_site | + | 11105 | 11105 | -3120 | 8525 | AN1193 |
| 2083 | CONTIG17 | 4656  | 5554  | 0.89 | 9.04E-02 | transcription_start_site | + | 8657  | 8657  | -3552 | 8517 | AN1193 |
| 2083 | CONTIG17 | 4656  | 5554  | 0.89 | 9.04E-02 | transcription_start_site | + | 8929  | 8929  | -3824 | 8518 | AN1193 |
| 2083 | CONTIG17 | 4656  | 5554  | 0.89 | 9.04E-02 | transcription_start_site | + | 9092  | 9092  | -3987 | 8519 | AN1193 |
| 2083 | CONTIG17 | 4656  | 5554  | 0.89 | 9.04E-02 | transcription_start_site | + | 9288  | 9288  | -4183 | 8520 | AN1193 |
| 2083 | CONTIG17 | 4656  | 5554  | 0.89 | 9.04E-02 | transcription_start_site | + | 9715  | 9715  | -4610 | 8521 | AN1193 |
| 2083 | CONTIG17 | 4656  | 5554  | 0.89 | 9.04E-02 | transcription_start_site | + | 9959  | 9959  | -4854 | 8522 | AN1193 |
| 1905 | CONTIG17 | 15243 | 15825 | 1    | 7.38E-02 | transcription_start_site | - | 12117 | 12117 | -3417 | 8526 | AN1194 |
| 1905 | CONTIG17 | 15243 | 15825 | 1    | 7.38E-02 | transcription_start_site | - | 12050 | 12050 | -3484 | 8527 | AN1194 |
| 1905 | CONTIG17 | 15243 | 15825 | 1    | 7.38E-02 | transcription_start_site | - | 13890 | 13890 | -1644 | 8528 | AN1195 |
| 1905 | CONTIG17 | 15243 | 15825 | 1    | 7.38E-02 | transcription_start_site | - | 13532 | 13532 | -2002 | 8529 | AN1195 |
| 1905 | CONTIG17 | 15243 | 15825 | 1    | 7.38E-02 | transcription_start_site | - | 13391 | 13391 | -2143 | 8530 | AN1195 |
| 1905 | CONTIG17 | 15243 | 15825 | 1    | 7.38E-02 | transcription_start_site | - | 13252 | 13252 | -2282 | 8531 | AN1195 |
| 1905 | CONTIG17 | 15243 | 15825 | 1    | 7.38E-02 | transcription_start_site | - | 12713 | 12713 | -2821 | 8532 | AN1195 |
| 1905 | CONTIG17 | 15243 | 15825 | 1    | 7.38E-02 | transcription_start_site | - | 15316 | 15316 | -218  | 8533 | AN1196 |
| 1905 | CONTIG17 | 15243 | 15825 | 1    | 7.38E-02 | transcription_start_site | - | 15126 | 15126 | -408  | 8534 | AN1196 |
| 1905 | CONTIG17 | 15243 | 15825 | 1    | 7.38E-02 | transcription_start_site | + | 16525 | 16525 | -991  | 8535 | AN1197 |
| 1905 | CONTIG17 | 15243 | 15825 | 1    | 7.38E-02 | transcription_start_site | + | 16704 | 16704 | -1170 | 8536 | AN1197 |
| 1905 | CONTIG17 | 15243 | 15825 | 1    | 7.38E-02 | transcription_start_site | + | 17392 | 17392 | -1858 | 8537 | AN1197 |
| 1905 | CONTIG17 | 15243 | 15825 | 1    | 7.38E-02 | transcription_start_site | + | 17759 | 17759 | -2225 | 8538 | AN1197 |
| 1905 | CONTIG17 | 15243 | 15825 | 1    | 7.38E-02 | transcription_start_site | + | 17953 | 17953 | -2419 | 8539 | AN1197 |
| 1905 | CONTIG17 | 15243 | 15825 | 1    | 7.38E-02 | transcription_start_site | + | 18451 | 18451 | -2917 | 8540 | AN1197 |
| 1905 | CONTIG17 | 15243 | 15825 | 1    | 7.38E-02 | transcription_start_site | + | 18597 | 18597 | -3063 | 8541 | AN1197 |
| 57   | CONTIG17 | 25283 | 25562 | 3.21 | 0.00E+00 | transcription_start_site | - | 21889 | 21889 | -3533 | 8542 | AN1198 |
| 57   | CONTIG17 | 25283 | 25562 | 3.21 | 0.00E+00 | transcription_start_site | - | 21458 | 21458 | -3964 | 8543 | AN1198 |
| 410  | CONTIG17 | 24603 | 25027 | 2.43 | 2.26E-04 | transcription_start_site | - | 21889 | 21889 | -2926 | 8542 | AN1198 |
| 410  | CONTIG17 | 24603 | 25027 | 2.43 | 2.26E-04 | transcription_start_site | - | 21458 | 21458 | -3357 | 8543 | AN1198 |
| 57   | CONTIG17 | 25283 | 25562 | 3.21 | 0.00E+00 | transcription_start_site | - | 24240 | 24240 | -1182 | 8544 | AN1199 |
| 57   | CONTIG17 | 25283 | 25562 | 3.21 | 0.00E+00 | transcription_start_site | - | 23948 | 23948 | -1474 | 8545 | AN1199 |
| 57   | CONTIG17 | 25283 | 25562 | 3.21 | 0.00E+00 | transcription_start_site | - | 23746 | 23746 | -1676 | 8546 | AN1199 |
| 57   | CONTIG17 | 25283 | 25562 | 3.21 | 0.00E+00 | transcription_start_site | - | 23572 | 23572 | -1850 | 8547 | AN1199 |
| 57   | CONTIG17 | 25283 | 25562 | 3.21 | 0.00E+00 | transcription_start_site | - | 22571 | 22571 | -2851 | 8548 | AN1199 |
| 410  | CONTIG17 | 24603 | 25027 | 2.43 | 2.26E-04 | transcription_start_site | - | 24240 | 24240 | -575  | 8544 | AN1199 |
| 410  | CONTIG17 | 24603 | 25027 | 2.43 | 2.26E-04 | transcription_start_site | - | 23948 | 23948 | -867  | 8545 | AN1199 |
| 410  | CONTIG17 | 24603 | 25027 | 2.43 | 2.26E-04 | transcription_start_site | - | 23746 | 23746 | -1069 | 8546 | AN1199 |
| 410  | CONTIG17 | 24603 | 25027 | 2.43 | 2.26E-04 | transcription_start_site | - | 23572 | 23572 | -1243 | 8547 | AN1199 |
| 410  | CONTIG17 | 24603 | 25027 | 2.43 | 2.26E-04 | transcription_start_site | - | 22571 | 22571 | -2244 | 8548 | AN1199 |
| 57   | CONTIG17 | 25283 | 25562 | 3.21 | 0.00E+00 | transcription_start_site | + | 30542 | 30542 | -5119 | 8553 | AN1201 |
| 1803 | CONTIG17 | 58580 | 59093 | 1.07 | 9.60E-02 | transcription_start_site | - | 56412 | 56412 | -2424 | 8580 | AN1210 |

|      |          |        |        |      |          |                          |   |        |        |       |      |        |
|------|----------|--------|--------|------|----------|--------------------------|---|--------|--------|-------|------|--------|
| 1803 | CONTIG17 | 58580  | 59093  | 1.07 | 9.60E-02 | transcription_start_site | - | 56208  | 56208  | -2628 | 8581 | AN1210 |
| 1803 | CONTIG17 | 58580  | 59093  | 1.07 | 9.60E-02 | transcription_start_site | - | 54721  | 54721  | -4115 | 8582 | AN1210 |
| 1803 | CONTIG17 | 58580  | 59093  | 1.07 | 9.60E-02 | transcription_start_site | + | 57850  | 57850  | 986   | 8585 | AN1211 |
| 1803 | CONTIG17 | 58580  | 59093  | 1.07 | 9.60E-02 | transcription_start_site | + | 59137  | 59137  | -300  | 8586 | AN1212 |
| 1803 | CONTIG17 | 58580  | 59093  | 1.07 | 9.60E-02 | transcription_start_site | + | 59224  | 59224  | -387  | 8587 | AN1212 |
| 1803 | CONTIG17 | 58580  | 59093  | 1.07 | 9.60E-02 | transcription_start_site | + | 59360  | 59360  | -523  | 8588 | AN1212 |
| 1803 | CONTIG17 | 58580  | 59093  | 1.07 | 9.60E-02 | transcription_start_site | + | 60755  | 60755  | -1918 | 8589 | AN1212 |
| 1803 | CONTIG17 | 58580  | 59093  | 1.07 | 9.60E-02 | transcription_start_site | + | 62468  | 62468  | -3631 | 8590 | AN1213 |
| 1803 | CONTIG17 | 58580  | 59093  | 1.07 | 9.60E-02 | transcription_start_site | + | 63126  | 63126  | -4289 | 8591 | AN1213 |
| 1034 | CONTIG17 | 72989  | 73413  | 1.68 | 4.92E-03 | transcription_start_site | - | 69668  | 69668  | -3533 | 8598 | AN1215 |
| 1034 | CONTIG17 | 72989  | 73413  | 1.68 | 4.92E-03 | transcription_start_site | - | 69607  | 69607  | -3594 | 8599 | AN1215 |
| 1034 | CONTIG17 | 72989  | 73413  | 1.68 | 4.92E-03 | transcription_start_site | - | 69454  | 69454  | -3747 | 8600 | AN1215 |
| 962  | CONTIG17 | 75094  | 75509  | 1.75 | 3.78E-03 | transcription_start_site | + | 76910  | 76910  | -1608 | 8605 | AN1217 |
| 962  | CONTIG17 | 75094  | 75509  | 1.75 | 3.78E-03 | transcription_start_site | + | 77210  | 77210  | -1908 | 8606 | AN1217 |
| 962  | CONTIG17 | 75094  | 75509  | 1.75 | 3.78E-03 | transcription_start_site | + | 78202  | 78202  | -2900 | 8607 | AN1217 |
| 1034 | CONTIG17 | 72989  | 73413  | 1.68 | 4.92E-03 | transcription_start_site | + | 76910  | 76910  | -3709 | 8605 | AN1217 |
| 1034 | CONTIG17 | 72989  | 73413  | 1.68 | 4.92E-03 | transcription_start_site | + | 77210  | 77210  | -4009 | 8606 | AN1217 |
| 1034 | CONTIG17 | 72989  | 73413  | 1.68 | 4.92E-03 | transcription_start_site | + | 78202  | 78202  | -5001 | 8607 | AN1217 |
| 1531 | CONTIG17 | 76587  | 77226  | 1.25 | 1.71E-02 | transcription_start_site | + | 76910  | 76910  | -3    | 8605 | AN1217 |
| 1531 | CONTIG17 | 76587  | 77226  | 1.25 | 1.71E-02 | transcription_start_site | + | 77210  | 77210  | -303  | 8606 | AN1217 |
| 1531 | CONTIG17 | 76587  | 77226  | 1.25 | 1.71E-02 | transcription_start_site | + | 78202  | 78202  | -1295 | 8607 | AN1217 |
| 2089 | CONTIG17 | 75769  | 76340  | 0.89 | 1.76E-01 | transcription_start_site | + | 76910  | 76910  | -855  | 8605 | AN1217 |
| 2089 | CONTIG17 | 75769  | 76340  | 0.89 | 1.76E-01 | transcription_start_site | + | 77210  | 77210  | -1155 | 8606 | AN1217 |
| 2089 | CONTIG17 | 75769  | 76340  | 0.89 | 1.76E-01 | transcription_start_site | + | 78202  | 78202  | -2147 | 8607 | AN1217 |
| 962  | CONTIG17 | 75094  | 75509  | 1.75 | 3.78E-03 | transcription_start_site | + | 79310  | 79310  | -4008 | 8608 | AN1218 |
| 962  | CONTIG17 | 75094  | 75509  | 1.75 | 3.78E-03 | transcription_start_site | + | 79537  | 79537  | -4235 | 8609 | AN1218 |
| 962  | CONTIG17 | 75094  | 75509  | 1.75 | 3.78E-03 | transcription_start_site | + | 79872  | 79872  | -4570 | 8610 | AN1218 |
| 1531 | CONTIG17 | 76587  | 77226  | 1.25 | 1.71E-02 | transcription_start_site | + | 79310  | 79310  | -2403 | 8608 | AN1218 |
| 1531 | CONTIG17 | 76587  | 77226  | 1.25 | 1.71E-02 | transcription_start_site | + | 79537  | 79537  | -2630 | 8609 | AN1218 |
| 1531 | CONTIG17 | 76587  | 77226  | 1.25 | 1.71E-02 | transcription_start_site | + | 79872  | 79872  | -2965 | 8610 | AN1218 |
| 2089 | CONTIG17 | 75769  | 76340  | 0.89 | 1.76E-01 | transcription_start_site | + | 79310  | 79310  | -3255 | 8608 | AN1218 |
| 2089 | CONTIG17 | 75769  | 76340  | 0.89 | 1.76E-01 | transcription_start_site | + | 79537  | 79537  | -3482 | 8609 | AN1218 |
| 2089 | CONTIG17 | 75769  | 76340  | 0.89 | 1.76E-01 | transcription_start_site | + | 79872  | 79872  | -3817 | 8610 | AN1218 |
| 747  | CONTIG17 | 84013  | 84427  | 2    | 4.01E-03 | transcription_start_site | - | 83703  | 83703  | -517  | 8611 | AN1219 |
| 747  | CONTIG17 | 84013  | 84427  | 2    | 4.01E-03 | transcription_start_site | - | 83432  | 83432  | -788  | 8612 | AN1219 |
| 747  | CONTIG17 | 84013  | 84427  | 2    | 4.01E-03 | transcription_start_site | - | 83168  | 83168  | -1052 | 8613 | AN1219 |
| 58   | CONTIG17 | 89417  | 90881  | 3.21 | 0.00E+00 | transcription_start_site | + | 91114  | 91114  | -965  | 8614 | AN1220 |
| 1797 | CONTIG17 | 108096 | 109182 | 1.07 | 3.90E-02 | transcription_start_site | - | 108143 | 108143 | -496  | 8628 | AN1226 |
| 1797 | CONTIG17 | 108096 | 109182 | 1.07 | 3.90E-02 | transcription_start_site | - | 107652 | 107652 | -987  | 8629 | AN1226 |
| 1797 | CONTIG17 | 108096 | 109182 | 1.07 | 3.90E-02 | transcription_start_site | + | 109535 | 109535 | -896  | 8630 | AN1227 |
| 1797 | CONTIG17 | 108096 | 109182 | 1.07 | 3.90E-02 | transcription_start_site | + | 109736 | 109736 | -1097 | 8631 | AN1227 |
| 1797 | CONTIG17 | 108096 | 109182 | 1.07 | 3.90E-02 | transcription_start_site | + | 110252 | 110252 | -1613 | 8632 | AN1227 |
| 1797 | CONTIG17 | 108096 | 109182 | 1.07 | 3.90E-02 | transcription_start_site | + | 110903 | 110903 | -2264 | 8633 | AN1227 |
| 1797 | CONTIG17 | 108096 | 109182 | 1.07 | 3.90E-02 | transcription_start_site | + | 111170 | 111170 | -2531 | 8634 | AN1227 |
| 1797 | CONTIG17 | 108096 | 109182 | 1.07 | 3.90E-02 | transcription_start_site | + | 111341 | 111341 | -2702 | 8635 | AN1227 |
| 1797 | CONTIG17 | 108096 | 109182 | 1.07 | 3.90E-02 | transcription_start_site | + | 111500 | 111500 | -2861 | 8636 | AN1227 |
| 1797 | CONTIG17 | 108096 | 109182 | 1.07 | 3.90E-02 | transcription_start_site | + | 111913 | 111913 | -3274 | 8637 | AN1227 |
| 1797 | CONTIG17 | 108096 | 109182 | 1.07 | 3.90E-02 | transcription_start_site | + | 112008 | 112008 | -3369 | 8638 | AN1227 |
| 1184 | CONTIG17 | 173629 | 173990 | 1.54 | 2.05E-02 | transcription_start_site | - | 173576 | 173576 | -233  | 8705 | AN1243 |
| 1184 | CONTIG17 | 173629 | 173990 | 1.54 | 2.05E-02 | transcription_start_site | - | 173123 | 173123 | -686  | 8706 | AN1243 |
| 1184 | CONTIG17 | 173629 | 173990 | 1.54 | 2.05E-02 | transcription_start_site | - | 173040 | 173040 | -769  | 8707 | AN1243 |
| 1184 | CONTIG17 | 173629 | 173990 | 1.54 | 2.05E-02 | transcription_start_site | - | 172884 | 172884 | -925  | 8708 | AN1243 |
| 1184 | CONTIG17 | 173629 | 173990 | 1.54 | 2.05E-02 | transcription_start_site | - | 172492 | 172492 | -1317 | 8709 | AN1243 |
| 1856 | CONTIG17 | 177154 | 177597 | 1.04 | 1.08E-01 | transcription_start_site | - | 173576 | 173576 | -3799 | 8705 | AN1243 |
| 1856 | CONTIG17 | 177154 | 177597 | 1.04 | 1.08E-01 | transcription_start_site | - | 173123 | 173123 | -4252 | 8706 | AN1243 |
| 1856 | CONTIG17 | 177154 | 177597 | 1.04 | 1.08E-01 | transcription_start_site | - | 173040 | 173040 | -4335 | 8707 | AN1243 |
| 1856 | CONTIG17 | 177154 | 177597 | 1.04 | 1.08E-01 | transcription_start_site | - | 172884 | 172884 | -4491 | 8708 | AN1243 |



|      |          |        |        |      |          |                          |   |        |        |       |      |        |
|------|----------|--------|--------|------|----------|--------------------------|---|--------|--------|-------|------|--------|
| 1856 | CONTIG17 | 177154 | 177597 | 1.04 | 1.08E-01 | transcription_start_site | - | 172492 | 172492 | -4883 | 8709 | AN1243 |
| 905  | CONTIG17 | 180679 | 180963 | 1.82 | 7.70E-03 | transcription_start_site | - | 176432 | 176432 | -4389 | 8710 | AN1244 |
| 905  | CONTIG17 | 180679 | 180963 | 1.82 | 7.70E-03 | transcription_start_site | - | 176333 | 176333 | -4488 | 8711 | AN1244 |
| 1856 | CONTIG17 | 177154 | 177597 | 1.04 | 1.08E-01 | transcription_start_site | - | 176432 | 176432 | -943  | 8710 | AN1244 |
| 1856 | CONTIG17 | 177154 | 177597 | 1.04 | 1.08E-01 | transcription_start_site | - | 176333 | 176333 | -1042 | 8711 | AN1244 |
| 1856 | CONTIG17 | 177154 | 177597 | 1.04 | 1.08E-01 | transcription_start_site | - | 175291 | 175291 | -2084 | 8712 | AN1244 |
| 2129 | CONTIG17 | 180009 | 180653 | 0.86 | 1.97E-01 | transcription_start_site | - | 176432 | 176432 | -3899 | 8710 | AN1244 |
| 2129 | CONTIG17 | 180009 | 180653 | 0.86 | 1.97E-01 | transcription_start_site | - | 176333 | 176333 | -3998 | 8711 | AN1244 |
| 2129 | CONTIG17 | 180009 | 180653 | 0.86 | 1.97E-01 | transcription_start_site | - | 175291 | 175291 | -5040 | 8712 | AN1244 |
| 1184 | CONTIG17 | 173629 | 173990 | 1.54 | 2.05E-02 | transcription_start_site | + | 178059 | 178059 | -4249 | 8713 | AN1245 |
| 1184 | CONTIG17 | 173629 | 173990 | 1.54 | 2.05E-02 | transcription_start_site | + | 178300 | 178300 | -4490 | 8714 | AN1245 |
| 1184 | CONTIG17 | 173629 | 173990 | 1.54 | 2.05E-02 | transcription_start_site | + | 178571 | 178571 | -4761 | 8715 | AN1245 |
| 1856 | CONTIG17 | 177154 | 177597 | 1.04 | 1.08E-01 | transcription_start_site | + | 178059 | 178059 | -683  | 8713 | AN1245 |
| 1856 | CONTIG17 | 177154 | 177597 | 1.04 | 1.08E-01 | transcription_start_site | + | 178300 | 178300 | -924  | 8714 | AN1245 |
| 1856 | CONTIG17 | 177154 | 177597 | 1.04 | 1.08E-01 | transcription_start_site | + | 178571 | 178571 | -1195 | 8715 | AN1245 |
| 905  | CONTIG17 | 180679 | 180963 | 1.82 | 7.70E-03 | transcription_start_site | - | 180603 | 180603 | -218  | 8716 | AN1246 |
| 905  | CONTIG17 | 180679 | 180963 | 1.82 | 7.70E-03 | transcription_start_site | - | 180480 | 180480 | -341  | 8717 | AN1246 |
| 905  | CONTIG17 | 180679 | 180963 | 1.82 | 7.70E-03 | transcription_start_site | - | 179996 | 179996 | -825  | 8718 | AN1246 |
| 1433 | CONTIG17 | 183019 | 183290 | 1.32 | 4.20E-02 | transcription_start_site | - | 180603 | 180603 | -2551 | 8716 | AN1246 |
| 1433 | CONTIG17 | 183019 | 183290 | 1.32 | 4.20E-02 | transcription_start_site | - | 180480 | 180480 | -2674 | 8717 | AN1246 |
| 1433 | CONTIG17 | 183019 | 183290 | 1.32 | 4.20E-02 | transcription_start_site | - | 179996 | 179996 | -3158 | 8718 | AN1246 |
| 2129 | CONTIG17 | 180009 | 180653 | 0.86 | 1.97E-01 | transcription_start_site | - | 180480 | 180480 | 149   | 8717 | AN1246 |
| 2129 | CONTIG17 | 180009 | 180653 | 0.86 | 1.97E-01 | transcription_start_site | - | 180603 | 180603 | 272   | 8716 | AN1246 |
| 2129 | CONTIG17 | 180009 | 180653 | 0.86 | 1.97E-01 | transcription_start_site | - | 179996 | 179996 | -335  | 8718 | AN1246 |
| 905  | CONTIG17 | 180679 | 180963 | 1.82 | 7.70E-03 | transcription_start_site | - | 181532 | 181532 | 711   | 8723 | AN1247 |
| 905  | CONTIG17 | 180679 | 180963 | 1.82 | 7.70E-03 | transcription_start_site | - | 181752 | 181752 | 931   | 8722 | AN1247 |
| 1433 | CONTIG17 | 183019 | 183290 | 1.32 | 4.20E-02 | transcription_start_site | - | 182763 | 182763 | -391  | 8719 | AN1247 |
| 1433 | CONTIG17 | 183019 | 183290 | 1.32 | 4.20E-02 | transcription_start_site | - | 182552 | 182552 | -602  | 8720 | AN1247 |
| 1433 | CONTIG17 | 183019 | 183290 | 1.32 | 4.20E-02 | transcription_start_site | - | 182137 | 182137 | -1017 | 8721 | AN1247 |
| 1433 | CONTIG17 | 183019 | 183290 | 1.32 | 4.20E-02 | transcription_start_site | - | 181752 | 181752 | -1402 | 8722 | AN1247 |
| 1433 | CONTIG17 | 183019 | 183290 | 1.32 | 4.20E-02 | transcription_start_site | - | 181532 | 181532 | -1622 | 8723 | AN1247 |
| 2129 | CONTIG17 | 180009 | 180653 | 0.86 | 1.97E-01 | transcription_start_site | - | 181532 | 181532 | 1201  | 8723 | AN1247 |
| 1433 | CONTIG17 | 183019 | 183290 | 1.32 | 4.20E-02 | transcription_start_site | - | 183320 | 183320 | 165   | 8729 | AN1248 |
| 1433 | CONTIG17 | 183019 | 183290 | 1.32 | 4.20E-02 | transcription_start_site | - | 183398 | 183398 | 243   | 8728 | AN1248 |
| 1433 | CONTIG17 | 183019 | 183290 | 1.32 | 4.20E-02 | transcription_start_site | - | 183513 | 183513 | 358   | 8727 | AN1248 |
| 1433 | CONTIG17 | 183019 | 183290 | 1.32 | 4.20E-02 | transcription_start_site | - | 183691 | 183691 | 536   | 8726 | AN1248 |
| 905  | CONTIG17 | 180679 | 180963 | 1.82 | 7.70E-03 | transcription_start_site | + | 185699 | 185699 | -4878 | 8730 | AN1249 |
| 905  | CONTIG17 | 180679 | 180963 | 1.82 | 7.70E-03 | transcription_start_site | + | 185901 | 185901 | -5080 | 8731 | AN1249 |
| 1433 | CONTIG17 | 183019 | 183290 | 1.32 | 4.20E-02 | transcription_start_site | + | 185699 | 185699 | -2544 | 8730 | AN1249 |
| 1433 | CONTIG17 | 183019 | 183290 | 1.32 | 4.20E-02 | transcription_start_site | + | 185901 | 185901 | -2746 | 8731 | AN1249 |
| 1433 | CONTIG17 | 183019 | 183290 | 1.32 | 4.20E-02 | transcription_start_site | + | 186111 | 186111 | -2956 | 8732 | AN1249 |
| 786  | CONTIG17 | 191639 | 192153 | 1.96 | 1.41E-03 | transcription_start_site | - | 191241 | 191241 | -655  | 8733 | AN1250 |
| 786  | CONTIG17 | 191639 | 192153 | 1.96 | 1.41E-03 | transcription_start_site | - | 190868 | 190868 | -1028 | 8734 | AN1250 |
| 871  | CONTIG17 | 194720 | 195295 | 1.86 | 3.17E-03 | transcription_start_site | - | 191241 | 191241 | -3766 | 8733 | AN1250 |
| 871  | CONTIG17 | 194720 | 195295 | 1.86 | 3.17E-03 | transcription_start_site | - | 190868 | 190868 | -4139 | 8734 | AN1250 |
| 2130 | CONTIG17 | 195846 | 196483 | 0.86 | 1.97E-01 | transcription_start_site | - | 191241 | 191241 | -4923 | 8733 | AN1250 |
| 2130 | CONTIG17 | 195846 | 196483 | 0.86 | 1.97E-01 | transcription_start_site | - | 190868 | 190868 | -5296 | 8734 | AN1250 |
| 783  | CONTIG17 | 197031 | 197624 | 1.96 | 0.00E+00 | transcription_start_site | - | 193333 | 193333 | -3994 | 8735 | AN1251 |
| 871  | CONTIG17 | 194720 | 195295 | 1.86 | 3.17E-03 | transcription_start_site | - | 193333 | 193333 | -1674 | 8735 | AN1251 |
| 2130 | CONTIG17 | 195846 | 196483 | 0.86 | 1.97E-01 | transcription_start_site | - | 193333 | 193333 | -2831 | 8735 | AN1251 |
| 783  | CONTIG17 | 197031 | 197624 | 1.96 | 0.00E+00 | transcription_start_site | + | 200955 | 200955 | -3627 | 8737 | AN1253 |
| 783  | CONTIG17 | 197031 | 197624 | 1.96 | 0.00E+00 | transcription_start_site | + | 201195 | 201195 | -3867 | 8738 | AN1253 |
| 2130 | CONTIG17 | 195846 | 196483 | 0.86 | 1.97E-01 | transcription_start_site | + | 200955 | 200955 | -4790 | 8737 | AN1253 |
| 2130 | CONTIG17 | 195846 | 196483 | 0.86 | 1.97E-01 | transcription_start_site | + | 201195 | 201195 | -5030 | 8738 | AN1253 |
| 1006 | CONTIG17 | 213992 | 214342 | 1.71 | 1.06E-02 | transcription_start_site | - | 209538 | 209538 | -4629 | 8741 | AN1255 |
| 1006 | CONTIG17 | 213992 | 214342 | 1.71 | 1.06E-02 | transcription_start_site | + | 213013 | 213013 | 1154  | 8748 | AN1256 |
| 1006 | CONTIG17 | 213992 | 214342 | 1.71 | 1.06E-02 | transcription_start_site | - | 214923 | 214923 | 756   | 8751 | AN1257 |

|      |          |        |        |      |          |                          |   |        |        |       |      |        |
|------|----------|--------|--------|------|----------|--------------------------|---|--------|--------|-------|------|--------|
| 1280 | CONTIG17 | 219532 | 219817 | 1.46 | 2.63E-02 | transcription_start_site | - | 215541 | 215541 | -4133 | 8749 | AN1257 |
| 1280 | CONTIG17 | 219532 | 219817 | 1.46 | 2.63E-02 | transcription_start_site | - | 215418 | 215418 | -4256 | 8750 | AN1257 |
| 1280 | CONTIG17 | 219532 | 219817 | 1.46 | 2.63E-02 | transcription_start_site | - | 214923 | 214923 | -4751 | 8751 | AN1257 |
| 1280 | CONTIG17 | 219532 | 219817 | 1.46 | 2.63E-02 | transcription_start_site | - | 218625 | 218625 | -1049 | 8752 | AN1258 |
| 1280 | CONTIG17 | 219532 | 219817 | 1.46 | 2.63E-02 | transcription_start_site | - | 220401 | 220401 | 726   | 8754 | AN1259 |
| 1280 | CONTIG17 | 219532 | 219817 | 1.46 | 2.63E-02 | transcription_start_site | + | 222461 | 222461 | -2786 | 8755 | AN1260 |
| 1280 | CONTIG17 | 219532 | 219817 | 1.46 | 2.63E-02 | transcription_start_site | + | 224717 | 224717 | -5042 | 8756 | AN1261 |
| 308  | CONTIG17 | 243008 | 243375 | 2.61 | 0.00E+00 | transcription_start_site | - | 240463 | 240463 | -2728 | 8774 | AN1266 |
| 308  | CONTIG17 | 243008 | 243375 | 2.61 | 0.00E+00 | transcription_start_site | - | 240257 | 240257 | -2934 | 8775 | AN1266 |
| 308  | CONTIG17 | 243008 | 243375 | 2.61 | 0.00E+00 | transcription_start_site | - | 239882 | 239882 | -3309 | 8776 | AN1266 |
| 308  | CONTIG17 | 243008 | 243375 | 2.61 | 0.00E+00 | transcription_start_site | - | 239410 | 239410 | -3781 | 8777 | AN1266 |
| 308  | CONTIG17 | 243008 | 243375 | 2.61 | 0.00E+00 | transcription_start_site | + | 244338 | 244338 | -1146 | 8782 | AN1268 |
| 308  | CONTIG17 | 243008 | 243375 | 2.61 | 0.00E+00 | transcription_start_site | + | 244632 | 244632 | -1440 | 8783 | AN1268 |
| 308  | CONTIG17 | 243008 | 243375 | 2.61 | 0.00E+00 | transcription_start_site | + | 245409 | 245409 | -2217 | 8784 | AN1268 |
| 1973 | CONTIG17 | 246617 | 247026 | 0.96 | 1.38E-01 | transcription_start_site | + | 248511 | 248511 | -1689 | 8785 | AN1268 |
| 1973 | CONTIG17 | 246617 | 247026 | 0.96 | 1.38E-01 | transcription_start_site | + | 248688 | 248688 | -1866 | 8786 | AN1268 |
| 1909 | CONTIG17 | 265438 | 265707 | 1    | 1.22E-01 | transcription_start_site | - | 261251 | 261251 | -4321 | 8800 | AN1273 |
| 1909 | CONTIG17 | 265438 | 265707 | 1    | 1.22E-01 | transcription_start_site | - | 260955 | 260955 | -4617 | 8801 | AN1273 |
| 1909 | CONTIG17 | 265438 | 265707 | 1    | 1.22E-01 | transcription_start_site | - | 260654 | 260654 | -4918 | 8802 | AN1273 |
| 1909 | CONTIG17 | 265438 | 265707 | 1    | 1.22E-01 | transcription_start_site | - | 260465 | 260465 | -5107 | 8803 | AN1273 |
| 1909 | CONTIG17 | 265438 | 265707 | 1    | 1.22E-01 | transcription_start_site | - | 265463 | 265463 | -109  | 8806 | AN1274 |
| 1909 | CONTIG17 | 265438 | 265707 | 1    | 1.22E-01 | transcription_start_site | - | 265369 | 265369 | -203  | 8807 | AN1274 |
| 1909 | CONTIG17 | 265438 | 265707 | 1    | 1.22E-01 | transcription_start_site | - | 265189 | 265189 | -383  | 8808 | AN1274 |
| 1909 | CONTIG17 | 265438 | 265707 | 1    | 1.22E-01 | transcription_start_site | - | 264888 | 264888 | -684  | 8809 | AN1274 |
| 1909 | CONTIG17 | 265438 | 265707 | 1    | 1.22E-01 | transcription_start_site | + | 266216 | 266216 | -643  | 8810 | AN1275 |
| 1909 | CONTIG17 | 265438 | 265707 | 1    | 1.22E-01 | transcription_start_site | + | 266471 | 266471 | -898  | 8811 | AN1275 |
| 1909 | CONTIG17 | 265438 | 265707 | 1    | 1.22E-01 | transcription_start_site | + | 270086 | 270086 | -4513 | 8819 | AN1277 |
| 1909 | CONTIG17 | 265438 | 265707 | 1    | 1.22E-01 | transcription_start_site | + | 270263 | 270263 | -4690 | 8820 | AN1277 |
| 1909 | CONTIG17 | 265438 | 265707 | 1    | 1.22E-01 | transcription_start_site | + | 270511 | 270511 | -4938 | 8821 | AN1277 |
| 1909 | CONTIG17 | 265438 | 265707 | 1    | 1.22E-01 | transcription_start_site | + | 270692 | 270692 | -5119 | 8822 | AN1277 |
| 1102 | CONTIG17 | 306389 | 306808 | 1.61 | 1.54E-02 | transcription_start_site | - | 303984 | 303984 | -2614 | 8856 | AN1288 |
| 1102 | CONTIG17 | 306389 | 306808 | 1.61 | 1.54E-02 | transcription_start_site | + | 310275 | 310275 | -3676 | 8857 | AN1290 |
| 1102 | CONTIG17 | 306389 | 306808 | 1.61 | 1.54E-02 | transcription_start_site | + | 310442 | 310442 | -3843 | 8858 | AN1290 |
| 1102 | CONTIG17 | 306389 | 306808 | 1.61 | 1.54E-02 | transcription_start_site | + | 310905 | 310905 | -4306 | 8859 | AN1290 |
| 1102 | CONTIG17 | 306389 | 306808 | 1.61 | 1.54E-02 | transcription_start_site | + | 311620 | 311620 | -5021 | 8860 | AN1290 |
| 1585 | CONTIG17 | 309614 | 310328 | 1.21 | 3.02E-02 | transcription_start_site | + | 310275 | 310275 | -304  | 8857 | AN1290 |
| 1585 | CONTIG17 | 309614 | 310328 | 1.21 | 3.02E-02 | transcription_start_site | + | 310442 | 310442 | -471  | 8858 | AN1290 |
| 1585 | CONTIG17 | 309614 | 310328 | 1.21 | 3.02E-02 | transcription_start_site | + | 310905 | 310905 | -934  | 8859 | AN1290 |
| 1585 | CONTIG17 | 309614 | 310328 | 1.21 | 3.02E-02 | transcription_start_site | + | 311620 | 311620 | -1649 | 8860 | AN1290 |
| 1585 | CONTIG17 | 309614 | 310328 | 1.21 | 3.02E-02 | transcription_start_site | + | 314701 | 314701 | -4730 | 8861 | AN1291 |
| 1585 | CONTIG17 | 309614 | 310328 | 1.21 | 3.02E-02 | transcription_start_site | + | 314845 | 314845 | -4874 | 8862 | AN1291 |
| 1585 | CONTIG17 | 309614 | 310328 | 1.21 | 3.02E-02 | transcription_start_site | + | 315101 | 315101 | -5130 | 8863 | AN1291 |
| 875  | CONTIG17 | 332029 | 332463 | 1.86 | 7.08E-03 | transcription_start_site | - | 328013 | 328013 | -4233 | 8874 | AN1297 |
| 875  | CONTIG17 | 332029 | 332463 | 1.86 | 7.08E-03 | transcription_start_site | - | 327539 | 327539 | -4707 | 8875 | AN1297 |
| 875  | CONTIG17 | 332029 | 332463 | 1.86 | 7.08E-03 | transcription_start_site | - | 327210 | 327210 | -5036 | 8876 | AN1297 |
| 1906 | CONTIG17 | 328736 | 329225 | 1    | 7.38E-02 | transcription_start_site | - | 328013 | 328013 | -967  | 8874 | AN1297 |
| 1906 | CONTIG17 | 328736 | 329225 | 1    | 7.38E-02 | transcription_start_site | - | 327539 | 327539 | -1441 | 8875 | AN1297 |
| 1906 | CONTIG17 | 328736 | 329225 | 1    | 7.38E-02 | transcription_start_site | - | 327210 | 327210 | -1770 | 8876 | AN1297 |
| 1906 | CONTIG17 | 328736 | 329225 | 1    | 7.38E-02 | transcription_start_site | - | 326612 | 326612 | -2368 | 8877 | AN1297 |
| 875  | CONTIG17 | 332029 | 332463 | 1.86 | 7.08E-03 | transcription_start_site | + | 333755 | 333755 | -1509 | 8878 | AN1298 |
| 1906 | CONTIG17 | 328736 | 329225 | 1    | 7.38E-02 | transcription_start_site | + | 333755 | 333755 | -4774 | 8878 | AN1298 |
| 1226 | CONTIG18 | 1741   | 2103   | 1.5  | 1.37E-02 | transcription_start_site | - | 1601   | 1601   | -321  | 8884 | AN1302 |
| 1226 | CONTIG18 | 1741   | 2103   | 1.5  | 1.37E-02 | transcription_start_site | - | 1380   | 1380   | -542  | 8885 | AN1302 |
| 1226 | CONTIG18 | 1741   | 2103   | 1.5  | 1.37E-02 | transcription_start_site | - | 1092   | 1092   | -830  | 8886 | AN1302 |
| 1226 | CONTIG18 | 1741   | 2103   | 1.5  | 1.37E-02 | transcription_start_site | - | 238    | 238    | -1684 | 8887 | AN1302 |
| 1730 | CONTIG18 | 5411   | 6670   | 1.11 | 3.02E-02 | transcription_start_site | - | 1601   | 1601   | -4439 | 8884 | AN1302 |
| 1730 | CONTIG18 | 5411   | 6670   | 1.11 | 3.02E-02 | transcription_start_site | - | 1380   | 1380   | -4660 | 8885 | AN1302 |

|      |          |        |        |      |          |                          |   |        |        |       |      |        |
|------|----------|--------|--------|------|----------|--------------------------|---|--------|--------|-------|------|--------|
| 1730 | CONTIG18 | 5411   | 6670   | 1.11 | 3.02E-02 | transcription_start_site | - | 1092   | 1092   | -4948 | 8886 | AN1302 |
| 1226 | CONTIG18 | 1741   | 2103   | 1.5  | 1.37E-02 | transcription_start_site | - | 2672   | 2672   | 750   | 8889 | AN1303 |
| 1414 | CONTIG18 | 6841   | 7175   | 1.34 | 2.63E-02 | transcription_start_site | - | 4751   | 4751   | -2257 | 8888 | AN1303 |
| 1414 | CONTIG18 | 6841   | 7175   | 1.34 | 2.63E-02 | transcription_start_site | - | 2672   | 2672   | -4336 | 8889 | AN1303 |
| 1730 | CONTIG18 | 5411   | 6670   | 1.11 | 3.02E-02 | transcription_start_site | - | 4751   | 4751   | -1289 | 8888 | AN1303 |
| 1730 | CONTIG18 | 5411   | 6670   | 1.11 | 3.02E-02 | transcription_start_site | - | 2672   | 2672   | -3368 | 8889 | AN1303 |
| 1414 | CONTIG18 | 6841   | 7175   | 1.34 | 2.63E-02 | transcription_start_site | - | 6814   | 6814   | -194  | 8890 | AN1304 |
| 1414 | CONTIG18 | 6841   | 7175   | 1.34 | 2.63E-02 | transcription_start_site | - | 6338   | 6338   | -670  | 8891 | AN1304 |
| 1730 | CONTIG18 | 5411   | 6670   | 1.11 | 3.02E-02 | transcription_start_site | - | 6338   | 6338   | 297   | 8891 | AN1304 |
| 1730 | CONTIG18 | 5411   | 6670   | 1.11 | 3.02E-02 | transcription_start_site | - | 6814   | 6814   | 773   | 8890 | AN1304 |
| 1414 | CONTIG18 | 6841   | 7175   | 1.34 | 2.63E-02 | transcription_start_site | - | 7869   | 7869   | 861   | 8893 | AN1305 |
| 1414 | CONTIG18 | 6841   | 7175   | 1.34 | 2.63E-02 | transcription_start_site | + | 11315  | 11315  | -4307 | 8894 | AN1306 |
| 1730 | CONTIG18 | 5411   | 6670   | 1.11 | 3.02E-02 | transcription_start_site | + | 11315  | 11315  | -5274 | 8894 | AN1306 |
| 416  | CONTIG18 | 47551  | 47900  | 2.42 | 0.00E+00 | transcription_start_site | - | 47496  | 47496  | -229  | 8946 | AN1319 |
| 416  | CONTIG18 | 47551  | 47900  | 2.42 | 0.00E+00 | transcription_start_site | - | 47394  | 47394  | -331  | 8947 | AN1319 |
| 416  | CONTIG18 | 47551  | 47900  | 2.42 | 0.00E+00 | transcription_start_site | - | 47229  | 47229  | -496  | 8948 | AN1319 |
| 416  | CONTIG18 | 47551  | 47900  | 2.42 | 0.00E+00 | transcription_start_site | + | 49044  | 49044  | -1318 | 8949 | AN1320 |
| 416  | CONTIG18 | 47551  | 47900  | 2.42 | 0.00E+00 | transcription_start_site | + | 49161  | 49161  | -1435 | 8950 | AN1320 |
| 832  | CONTIG18 | 89488  | 89992  | 1.89 | 1.14E-03 | transcription_start_site | - | 84666  | 84666  | -5074 | 8984 | AN1330 |
| 1589 | CONTIG18 | 84845  | 85204  | 1.21 | 4.20E-02 | transcription_start_site | - | 84666  | 84666  | -358  | 8984 | AN1330 |
| 1589 | CONTIG18 | 84845  | 85204  | 1.21 | 4.20E-02 | transcription_start_site | - | 84025  | 84025  | -999  | 8985 | AN1330 |
| 1589 | CONTIG18 | 84845  | 85204  | 1.21 | 4.20E-02 | transcription_start_site | - | 83377  | 83377  | -1647 | 8986 | AN1330 |
| 1589 | CONTIG18 | 84845  | 85204  | 1.21 | 4.20E-02 | transcription_start_site | + | 85664  | 85664  | -639  | 8987 | AN1331 |
| 1589 | CONTIG18 | 84845  | 85204  | 1.21 | 4.20E-02 | transcription_start_site | + | 86120  | 86120  | -1095 | 8988 | AN1331 |
| 1589 | CONTIG18 | 84845  | 85204  | 1.21 | 4.20E-02 | transcription_start_site | + | 87436  | 87436  | -2411 | 8989 | AN1332 |
| 832  | CONTIG18 | 89488  | 89992  | 1.89 | 1.14E-03 | transcription_start_site | - | 89561  | 89561  | -179  | 8990 | AN1333 |
| 832  | CONTIG18 | 89488  | 89992  | 1.89 | 1.14E-03 | transcription_start_site | - | 89449  | 89449  | -291  | 8991 | AN1333 |
| 832  | CONTIG18 | 89488  | 89992  | 1.89 | 1.14E-03 | transcription_start_site | - | 89317  | 89317  | -423  | 8992 | AN1333 |
| 832  | CONTIG18 | 89488  | 89992  | 1.89 | 1.14E-03 | transcription_start_site | - | 89176  | 89176  | -564  | 8993 | AN1333 |
| 832  | CONTIG18 | 89488  | 89992  | 1.89 | 1.14E-03 | transcription_start_site | + | 90354  | 90354  | -614  | 8994 | AN1334 |
| 832  | CONTIG18 | 89488  | 89992  | 1.89 | 1.14E-03 | transcription_start_site | + | 90450  | 90450  | -710  | 8995 | AN1334 |
| 832  | CONTIG18 | 89488  | 89992  | 1.89 | 1.14E-03 | transcription_start_site | + | 93114  | 93114  | -3374 | 9000 | AN1336 |
| 266  | CONTIG18 | 99093  | 99662  | 2.68 | 0.00E+00 | transcription_start_site | - | 100213 | 100213 | 835   | 9003 | AN1338 |
| 266  | CONTIG18 | 99093  | 99662  | 2.68 | 0.00E+00 | transcription_start_site | - | 100389 | 100389 | 1011  | 9002 | AN1338 |
| 266  | CONTIG18 | 99093  | 99662  | 2.68 | 0.00E+00 | transcription_start_site | - | 100572 | 100572 | 1194  | 9001 | AN1338 |
| 1187 | CONTIG18 | 109128 | 109717 | 1.53 | 9.75E-04 | transcription_start_site | - | 104935 | 104935 | -4487 | 9004 | AN1339 |
| 1187 | CONTIG18 | 109128 | 109717 | 1.53 | 9.75E-04 | transcription_start_site | - | 104833 | 104833 | -4589 | 9005 | AN1339 |
| 1187 | CONTIG18 | 109128 | 109717 | 1.53 | 9.75E-04 | transcription_start_site | - | 104732 | 104732 | -4690 | 9006 | AN1339 |
| 1187 | CONTIG18 | 109128 | 109717 | 1.53 | 9.75E-04 | transcription_start_site | - | 104629 | 104629 | -4793 | 9007 | AN1339 |
| 1187 | CONTIG18 | 109128 | 109717 | 1.53 | 9.75E-04 | transcription_start_site | - | 104454 | 104454 | -4968 | 9008 | AN1339 |
| 1187 | CONTIG18 | 109128 | 109717 | 1.53 | 9.75E-04 | transcription_start_site | - | 104217 | 104217 | -5205 | 9009 | AN1339 |
| 1187 | CONTIG18 | 109128 | 109717 | 1.53 | 9.75E-04 | transcription_start_site | - | 107244 | 107244 | -2178 | 9014 | AN1340 |
| 1187 | CONTIG18 | 109128 | 109717 | 1.53 | 9.75E-04 | transcription_start_site | - | 107059 | 107059 | -2363 | 9015 | AN1340 |
| 1187 | CONTIG18 | 109128 | 109717 | 1.53 | 9.75E-04 | transcription_start_site | - | 106716 | 106716 | -2706 | 9016 | AN1340 |
| 1187 | CONTIG18 | 109128 | 109717 | 1.53 | 9.75E-04 | transcription_start_site | - | 106570 | 106570 | -2852 | 9017 | AN1340 |
| 1187 | CONTIG18 | 109128 | 109717 | 1.53 | 9.75E-04 | transcription_start_site | - | 108727 | 108727 | -695  | 9018 | AN1341 |
| 1187 | CONTIG18 | 109128 | 109717 | 1.53 | 9.75E-04 | transcription_start_site | - | 108607 | 108607 | -815  | 9019 | AN1341 |
| 1187 | CONTIG18 | 109128 | 109717 | 1.53 | 9.75E-04 | transcription_start_site | - | 108518 | 108518 | -904  | 9020 | AN1341 |
| 1187 | CONTIG18 | 109128 | 109717 | 1.53 | 9.75E-04 | transcription_start_site | - | 108040 | 108040 | -1382 | 9021 | AN1341 |
| 1187 | CONTIG18 | 109128 | 109717 | 1.53 | 9.75E-04 | transcription_start_site | + | 109851 | 109851 | -428  | 9022 | AN1342 |
| 1187 | CONTIG18 | 109128 | 109717 | 1.53 | 9.75E-04 | transcription_start_site | + | 109994 | 109994 | -571  | 9023 | AN1342 |
| 1187 | CONTIG18 | 109128 | 109717 | 1.53 | 9.75E-04 | transcription_start_site | + | 114307 | 114307 | -4884 | 9026 | AN1344 |
| 1187 | CONTIG18 | 109128 | 109717 | 1.53 | 9.75E-04 | transcription_start_site | + | 114459 | 114459 | -5036 | 9027 | AN1344 |
| 2168 | CONTIG18 | 135528 | 135967 | 0.82 | 1.15E-01 | transcription_start_site | + | 135740 | 135740 | 7     | 9056 | AN1355 |
| 2168 | CONTIG18 | 135528 | 135967 | 0.82 | 1.15E-01 | transcription_start_site | + | 136006 | 136006 | -258  | 9057 | AN1355 |
| 452  | CONTIG18 | 137338 | 137677 | 2.38 | 0.00E+00 | transcription_start_site | + | 137985 | 137985 | -477  | 9058 | AN1356 |
| 2168 | CONTIG18 | 135528 | 135967 | 0.82 | 1.15E-01 | transcription_start_site | + | 137985 | 137985 | -2237 | 9058 | AN1356 |

|      |          |        |        |      |          |                          |   |        |        |       |      |        |
|------|----------|--------|--------|------|----------|--------------------------|---|--------|--------|-------|------|--------|
| 1590 | CONTIG18 | 145143 | 145788 | 1.21 | 4.20E-02 | transcription_start_site | - | 141569 | 141569 | -3896 | 9059 | AN1357 |
| 1590 | CONTIG18 | 145143 | 145788 | 1.21 | 4.20E-02 | transcription_start_site | - | 141005 | 141005 | -4460 | 9060 | AN1357 |
| 1590 | CONTIG18 | 145143 | 145788 | 1.21 | 4.20E-02 | transcription_start_site | - | 140607 | 140607 | -4858 | 9061 | AN1357 |
| 1590 | CONTIG18 | 145143 | 145788 | 1.21 | 4.20E-02 | transcription_start_site | - | 140158 | 140158 | -5307 | 9062 | AN1357 |
| 1590 | CONTIG18 | 145143 | 145788 | 1.21 | 4.20E-02 | transcription_start_site | - | 144843 | 144843 | -622  | 9063 | AN1358 |
| 1590 | CONTIG18 | 145143 | 145788 | 1.21 | 4.20E-02 | transcription_start_site | - | 144408 | 144408 | -1057 | 9064 | AN1358 |
| 1590 | CONTIG18 | 145143 | 145788 | 1.21 | 4.20E-02 | transcription_start_site | - | 144017 | 144017 | -1448 | 9065 | AN1358 |
| 1590 | CONTIG18 | 145143 | 145788 | 1.21 | 4.20E-02 | transcription_start_site | - | 143891 | 143891 | -1574 | 9066 | AN1358 |
| 1590 | CONTIG18 | 145143 | 145788 | 1.21 | 4.20E-02 | transcription_start_site | - | 143752 | 143752 | -1713 | 9067 | AN1358 |
| 1590 | CONTIG18 | 145143 | 145788 | 1.21 | 4.20E-02 | transcription_start_site | - | 143493 | 143493 | -1972 | 9068 | AN1358 |
| 1590 | CONTIG18 | 145143 | 145788 | 1.21 | 4.20E-02 | transcription_start_site | - | 143171 | 143171 | -2294 | 9069 | AN1358 |
| 1590 | CONTIG18 | 145143 | 145788 | 1.21 | 4.20E-02 | transcription_start_site | - | 143022 | 143022 | -2443 | 9070 | AN1358 |
| 1590 | CONTIG18 | 145143 | 145788 | 1.21 | 4.20E-02 | transcription_start_site | + | 150203 | 150203 | -4737 | 9073 | AN1361 |
| 1590 | CONTIG18 | 145143 | 145788 | 1.21 | 4.20E-02 | transcription_start_site | + | 150389 | 150389 | -4923 | 9074 | AN1361 |
| 1538 | CONTIG18 | 165901 | 166250 | 1.24 | 1.83E-02 | transcription_start_site | - | 162411 | 162411 | -3664 | 9092 | AN1367 |
| 1538 | CONTIG18 | 165901 | 166250 | 1.24 | 1.83E-02 | transcription_start_site | - | 162352 | 162352 | -3723 | 9093 | AN1367 |
| 1538 | CONTIG18 | 165901 | 166250 | 1.24 | 1.83E-02 | transcription_start_site | - | 165829 | 165829 | -246  | 9096 | AN1369 |
| 1538 | CONTIG18 | 165901 | 166250 | 1.24 | 1.83E-02 | transcription_start_site | - | 165580 | 165580 | -495  | 9097 | AN1369 |
| 1538 | CONTIG18 | 165901 | 166250 | 1.24 | 1.83E-02 | transcription_start_site | - | 165343 | 165343 | -732  | 9098 | AN1369 |
| 1538 | CONTIG18 | 165901 | 166250 | 1.24 | 1.83E-02 | transcription_start_site | + | 166670 | 166670 | -594  | 9099 | AN1370 |
| 1538 | CONTIG18 | 165901 | 166250 | 1.24 | 1.83E-02 | transcription_start_site | + | 166965 | 166965 | -889  | 9100 | AN1370 |
| 1538 | CONTIG18 | 165901 | 166250 | 1.24 | 1.83E-02 | transcription_start_site | + | 167136 | 167136 | -1060 | 9101 | AN1370 |
| 1538 | CONTIG18 | 165901 | 166250 | 1.24 | 1.83E-02 | transcription_start_site | + | 169165 | 169165 | -3089 | 9103 | AN1372 |
| 1538 | CONTIG18 | 165901 | 166250 | 1.24 | 1.83E-02 | transcription_start_site | + | 170068 | 170068 | -3992 | 9104 | AN1372 |
| 1538 | CONTIG18 | 165901 | 166250 | 1.24 | 1.83E-02 | transcription_start_site | + | 170222 | 170222 | -4146 | 9105 | AN1372 |
| 1538 | CONTIG18 | 165901 | 166250 | 1.24 | 1.83E-02 | transcription_start_site | + | 170607 | 170607 | -4531 | 9106 | AN1372 |
| 1538 | CONTIG18 | 165901 | 166250 | 1.24 | 1.83E-02 | transcription_start_site | + | 170844 | 170844 | -4768 | 9107 | AN1372 |
| 1287 | CONTIG19 | 18904  | 19200  | 1.45 | 6.24E-03 | transcription_start_site | - | 18067  | 18067  | -985  | 9124 | AN1378 |
| 1287 | CONTIG19 | 18904  | 19200  | 1.45 | 6.24E-03 | transcription_start_site | - | 17821  | 17821  | -1231 | 9125 | AN1378 |
| 1287 | CONTIG19 | 18904  | 19200  | 1.45 | 6.24E-03 | transcription_start_site | - | 17723  | 17723  | -1329 | 9126 | AN1378 |
| 1287 | CONTIG19 | 18904  | 19200  | 1.45 | 6.24E-03 | transcription_start_site | - | 17480  | 17480  | -1572 | 9127 | AN1378 |
| 1287 | CONTIG19 | 18904  | 19200  | 1.45 | 6.24E-03 | transcription_start_site | + | 19747  | 19747  | -695  | 9128 | AN1379 |
| 1287 | CONTIG19 | 18904  | 19200  | 1.45 | 6.24E-03 | transcription_start_site | + | 20073  | 20073  | -1021 | 9129 | AN1379 |
| 1287 | CONTIG19 | 18904  | 19200  | 1.45 | 6.24E-03 | transcription_start_site | + | 23627  | 23627  | -4575 | 9132 | AN1381 |
| 2308 | CONTIG19 | 29644  | 30129  | 0.66 | 1.97E-01 | transcription_start_site | - | 29273  | 29273  | -613  | 9135 | AN1383 |
| 2308 | CONTIG19 | 29644  | 30129  | 0.66 | 1.97E-01 | transcription_start_site | - | 29176  | 29176  | -710  | 9136 | AN1383 |
| 2308 | CONTIG19 | 29644  | 30129  | 0.66 | 1.97E-01 | transcription_start_site | - | 29029  | 29029  | -857  | 9137 | AN1383 |
| 1188 | CONTIG19 | 66453  | 66807  | 1.53 | 1.53E-03 | transcription_start_site | - | 66140  | 66140  | -490  | 9167 | AN1396 |
| 1188 | CONTIG19 | 66453  | 66807  | 1.53 | 1.53E-03 | transcription_start_site | - | 65633  | 65633  | -997  | 9168 | AN1396 |
| 1188 | CONTIG19 | 66453  | 66807  | 1.53 | 1.53E-03 | transcription_start_site | - | 65321  | 65321  | -1309 | 9169 | AN1396 |
| 1188 | CONTIG19 | 66453  | 66807  | 1.53 | 1.53E-03 | transcription_start_site | - | 63939  | 63939  | -2691 | 9170 | AN1396 |
| 1188 | CONTIG19 | 66453  | 66807  | 1.53 | 1.53E-03 | transcription_start_site | + | 68186  | 68186  | -1556 | 9171 | AN1397 |
| 1188 | CONTIG19 | 66453  | 66807  | 1.53 | 1.53E-03 | transcription_start_site | + | 68626  | 68626  | -1996 | 9172 | AN1397 |
| 1188 | CONTIG19 | 66453  | 66807  | 1.53 | 1.53E-03 | transcription_start_site | + | 69450  | 69450  | -2820 | 9173 | AN1397 |
| 1188 | CONTIG19 | 66453  | 66807  | 1.53 | 1.53E-03 | transcription_start_site | + | 69654  | 69654  | -3024 | 9174 | AN1397 |
| 1188 | CONTIG19 | 66453  | 66807  | 1.53 | 1.53E-03 | transcription_start_site | + | 69997  | 69997  | -3367 | 9175 | AN1397 |
| 1188 | CONTIG19 | 66453  | 66807  | 1.53 | 1.53E-03 | transcription_start_site | + | 70207  | 70207  | -3577 | 9176 | AN1397 |
| 1260 | CONTIG20 | 526    | 1030   | 1.47 | 3.17E-03 | transcription_start_site | + | 4057   | 4057   | -3279 | 9180 | AN1399 |
| 1260 | CONTIG20 | 526    | 1030   | 1.47 | 3.17E-03 | transcription_start_site | + | 4165   | 4165   | -3387 | 9181 | AN1399 |
| 1260 | CONTIG20 | 526    | 1030   | 1.47 | 3.17E-03 | transcription_start_site | + | 4660   | 4660   | -3882 | 9182 | AN1399 |
| 1260 | CONTIG20 | 526    | 1030   | 1.47 | 3.17E-03 | transcription_start_site | + | 5287   | 5287   | -4509 | 9183 | AN1399 |
| 1260 | CONTIG20 | 526    | 1030   | 1.47 | 3.17E-03 | transcription_start_site | + | 5725   | 5725   | -4947 | 9184 | AN1399 |
| 1828 | CONTIG20 | 12606  | 12950  | 1.05 | 4.20E-02 | transcription_start_site | - | 11577  | 11577  | -1201 | 9187 | AN1401 |
| 1828 | CONTIG20 | 12606  | 12950  | 1.05 | 4.20E-02 | transcription_start_site | - | 11444  | 11444  | -1334 | 9188 | AN1401 |
| 1828 | CONTIG20 | 12606  | 12950  | 1.05 | 4.20E-02 | transcription_start_site | - | 11352  | 11352  | -1426 | 9189 | AN1401 |
| 1828 | CONTIG20 | 12606  | 12950  | 1.05 | 4.20E-02 | transcription_start_site | - | 11232  | 11232  | -1546 | 9190 | AN1401 |
| 1828 | CONTIG20 | 12606  | 12950  | 1.05 | 4.20E-02 | transcription_start_site | - | 11103  | 11103  | -1675 | 9191 | AN1401 |

|      |          |       |       |      |          |                          |   |       |       |       |      |        |
|------|----------|-------|-------|------|----------|--------------------------|---|-------|-------|-------|------|--------|
| 1828 | CONTIG20 | 12606 | 12950 | 1.05 | 4.20E-02 | transcription_start_site | - | 10332 | 10332 | -2446 | 9192 | AN1401 |
| 1828 | CONTIG20 | 12606 | 12950 | 1.05 | 4.20E-02 | transcription_start_site | - | 9508  | 9508  | -3270 | 9193 | AN1401 |
| 1828 | CONTIG20 | 12606 | 12950 | 1.05 | 4.20E-02 | transcription_start_site | - | 8990  | 8990  | -3788 | 9194 | AN1401 |
| 1828 | CONTIG20 | 12606 | 12950 | 1.05 | 4.20E-02 | transcription_start_site | - | 8683  | 8683  | -4095 | 9195 | AN1401 |
| 1828 | CONTIG20 | 12606 | 12950 | 1.05 | 4.20E-02 | transcription_start_site | - | 8246  | 8246  | -4532 | 9196 | AN1401 |
| 1828 | CONTIG20 | 12606 | 12950 | 1.05 | 4.20E-02 | transcription_start_site | - | 8019  | 8019  | -4759 | 9197 | AN1401 |
| 1828 | CONTIG20 | 12606 | 12950 | 1.05 | 4.20E-02 | transcription_start_site | + | 13966 | 13966 | -1188 | 9198 | AN1402 |
| 1828 | CONTIG20 | 12606 | 12950 | 1.05 | 4.20E-02 | transcription_start_site | + | 14899 | 14899 | -2121 | 9199 | AN1402 |
| 1377 | CONTIG22 | 8936  | 9433  | 1.37 | 2.88E-02 | transcription_start_site | - | 7876  | 7876  | -1308 | 9205 | AN1406 |
| 1377 | CONTIG22 | 8936  | 9433  | 1.37 | 2.88E-02 | transcription_start_site | - | 7774  | 7774  | -1410 | 9206 | AN1406 |
| 1377 | CONTIG22 | 8936  | 9433  | 1.37 | 2.88E-02 | transcription_start_site | - | 7743  | 7743  | -1441 | 9207 | AN1406 |
| 1377 | CONTIG22 | 8936  | 9433  | 1.37 | 2.88E-02 | transcription_start_site | - | 7646  | 7646  | -1538 | 9208 | AN1406 |
| 1377 | CONTIG22 | 8936  | 9433  | 1.37 | 2.88E-02 | transcription_start_site | - | 7078  | 7078  | -2106 | 9209 | AN1406 |
| 1377 | CONTIG22 | 8936  | 9433  | 1.37 | 2.88E-02 | transcription_start_site | - | 6689  | 6689  | -2495 | 9210 | AN1406 |
| 1377 | CONTIG22 | 8936  | 9433  | 1.37 | 2.88E-02 | transcription_start_site | - | 6361  | 6361  | -2823 | 9211 | AN1406 |
| 1377 | CONTIG22 | 8936  | 9433  | 1.37 | 2.88E-02 | transcription_start_site | - | 5761  | 5761  | -3423 | 9212 | AN1406 |
| 1377 | CONTIG22 | 8936  | 9433  | 1.37 | 2.88E-02 | transcription_start_site | - | 5259  | 5259  | -3925 | 9213 | AN1406 |
| 1377 | CONTIG22 | 8936  | 9433  | 1.37 | 2.88E-02 | transcription_start_site | + | 9798  | 9798  | -613  | 9214 | AN1407 |
| 1377 | CONTIG22 | 8936  | 9433  | 1.37 | 2.88E-02 | transcription_start_site | + | 10078 | 10078 | -893  | 9215 | AN1407 |
| 1377 | CONTIG22 | 8936  | 9433  | 1.37 | 2.88E-02 | transcription_start_site | + | 14139 | 14139 | -4954 | 9220 | AN1409 |
| 1377 | CONTIG22 | 8936  | 9433  | 1.37 | 2.88E-02 | transcription_start_site | + | 14266 | 14266 | -5081 | 9221 | AN1409 |
| 1377 | CONTIG22 | 8936  | 9433  | 1.37 | 2.88E-02 | transcription_start_site | + | 14372 | 14372 | -5187 | 9222 | AN1409 |
| 27   | CONTIG22 | 31435 | 31794 | 3.39 | 0.00E+00 | transcription_start_site | - | 30335 | 30335 | -1279 | 9240 | AN1414 |
| 27   | CONTIG22 | 31435 | 31794 | 3.39 | 0.00E+00 | transcription_start_site | - | 30131 | 30131 | -1483 | 9241 | AN1414 |
| 27   | CONTIG22 | 31435 | 31794 | 3.39 | 0.00E+00 | transcription_start_site | - | 28529 | 28529 | -3085 | 9242 | AN1414 |
| 68   | CONTIG22 | 32120 | 33144 | 3.18 | 0.00E+00 | transcription_start_site | - | 30335 | 30335 | -2297 | 9240 | AN1414 |
| 68   | CONTIG22 | 32120 | 33144 | 3.18 | 0.00E+00 | transcription_start_site | - | 30131 | 30131 | -2501 | 9241 | AN1414 |
| 68   | CONTIG22 | 32120 | 33144 | 3.18 | 0.00E+00 | transcription_start_site | - | 28529 | 28529 | -4103 | 9242 | AN1414 |
| 27   | CONTIG22 | 31435 | 31794 | 3.39 | 0.00E+00 | transcription_start_site | + | 32578 | 32578 | -963  | 9243 | AN1415 |
| 27   | CONTIG22 | 31435 | 31794 | 3.39 | 0.00E+00 | transcription_start_site | + | 33024 | 33024 | -1409 | 9244 | AN1415 |
| 68   | CONTIG22 | 32120 | 33144 | 3.18 | 0.00E+00 | transcription_start_site | + | 32578 | 32578 | 54    | 9243 | AN1415 |
| 68   | CONTIG22 | 32120 | 33144 | 3.18 | 0.00E+00 | transcription_start_site | + | 33024 | 33024 | -392  | 9244 | AN1415 |
| 68   | CONTIG22 | 32120 | 33144 | 3.18 | 0.00E+00 | transcription_start_site | - | 33851 | 33851 | 1219  | 9248 | AN1416 |
| 98   | CONTIG22 | 40280 | 40780 | 3.09 | 0.00E+00 | transcription_start_site | - | 36720 | 36720 | -3810 | 9245 | AN1416 |
| 98   | CONTIG22 | 40280 | 40780 | 3.09 | 0.00E+00 | transcription_start_site | - | 36552 | 36552 | -3978 | 9246 | AN1416 |
| 98   | CONTIG22 | 40280 | 40780 | 3.09 | 0.00E+00 | transcription_start_site | - | 36385 | 36385 | -4145 | 9247 | AN1416 |
| 1326 | CONTIG22 | 36990 | 37492 | 1.42 | 6.74E-02 | transcription_start_site | - | 36720 | 36720 | -521  | 9245 | AN1416 |
| 1326 | CONTIG22 | 36990 | 37492 | 1.42 | 6.74E-02 | transcription_start_site | - | 36552 | 36552 | -689  | 9246 | AN1416 |
| 1326 | CONTIG22 | 36990 | 37492 | 1.42 | 6.74E-02 | transcription_start_site | - | 36385 | 36385 | -856  | 9247 | AN1416 |
| 1326 | CONTIG22 | 36990 | 37492 | 1.42 | 6.74E-02 | transcription_start_site | - | 33851 | 33851 | -3390 | 9248 | AN1416 |
| 98   | CONTIG22 | 40280 | 40780 | 3.09 | 0.00E+00 | transcription_start_site | - | 40615 | 40615 | 85    | 9249 | AN1417 |
| 98   | CONTIG22 | 40280 | 40780 | 3.09 | 0.00E+00 | transcription_start_site | - | 40167 | 40167 | -363  | 9250 | AN1417 |
| 98   | CONTIG22 | 40280 | 40780 | 3.09 | 0.00E+00 | transcription_start_site | - | 40043 | 40043 | -487  | 9251 | AN1417 |
| 98   | CONTIG22 | 40280 | 40780 | 3.09 | 0.00E+00 | transcription_start_site | - | 39898 | 39898 | -632  | 9252 | AN1417 |
| 98   | CONTIG22 | 40280 | 40780 | 3.09 | 0.00E+00 | transcription_start_site | - | 39776 | 39776 | -754  | 9253 | AN1417 |
| 98   | CONTIG22 | 40280 | 40780 | 3.09 | 0.00E+00 | transcription_start_site | - | 39566 | 39566 | -964  | 9254 | AN1417 |
| 1281 | CONTIG22 | 42245 | 43262 | 1.46 | 3.02E-02 | transcription_start_site | - | 40615 | 40615 | -2138 | 9249 | AN1417 |
| 1281 | CONTIG22 | 42245 | 43262 | 1.46 | 3.02E-02 | transcription_start_site | - | 40167 | 40167 | -2586 | 9250 | AN1417 |
| 1281 | CONTIG22 | 42245 | 43262 | 1.46 | 3.02E-02 | transcription_start_site | - | 40043 | 40043 | -2710 | 9251 | AN1417 |
| 1281 | CONTIG22 | 42245 | 43262 | 1.46 | 3.02E-02 | transcription_start_site | - | 39898 | 39898 | -2855 | 9252 | AN1417 |
| 1281 | CONTIG22 | 42245 | 43262 | 1.46 | 3.02E-02 | transcription_start_site | - | 39776 | 39776 | -2977 | 9253 | AN1417 |
| 1281 | CONTIG22 | 42245 | 43262 | 1.46 | 3.02E-02 | transcription_start_site | - | 39566 | 39566 | -3187 | 9254 | AN1417 |
| 98   | CONTIG22 | 40280 | 40780 | 3.09 | 0.00E+00 | transcription_start_site | + | 40775 | 40775 | -245  | 9255 | AN1418 |
| 98   | CONTIG22 | 40280 | 40780 | 3.09 | 0.00E+00 | transcription_start_site | + | 40830 | 40830 | -300  | 9256 | AN1418 |
| 98   | CONTIG22 | 40280 | 40780 | 3.09 | 0.00E+00 | transcription_start_site | + | 40957 | 40957 | -427  | 9257 | AN1418 |
| 98   | CONTIG22 | 40280 | 40780 | 3.09 | 0.00E+00 | transcription_start_site | + | 41154 | 41154 | -624  | 9258 | AN1418 |
| 1326 | CONTIG22 | 36990 | 37492 | 1.42 | 6.74E-02 | transcription_start_site | + | 40775 | 40775 | -3534 | 9255 | AN1418 |

|      |          |        |        |      |          |                          |   |        |        |       |      |        |
|------|----------|--------|--------|------|----------|--------------------------|---|--------|--------|-------|------|--------|
| 1326 | CONTIG22 | 36990  | 37492  | 1.42 | 6.74E-02 | transcription_start_site | + | 40830  | 40830  | -3589 | 9256 | AN1418 |
| 1326 | CONTIG22 | 36990  | 37492  | 1.42 | 6.74E-02 | transcription_start_site | + | 40957  | 40957  | -3716 | 9257 | AN1418 |
| 1326 | CONTIG22 | 36990  | 37492  | 1.42 | 6.74E-02 | transcription_start_site | + | 41154  | 41154  | -3913 | 9258 | AN1418 |
| 98   | CONTIG22 | 40280  | 40780  | 3.09 | 0.00E+00 | transcription_start_site | + | 43443  | 43443  | -2913 | 9259 | AN1419 |
| 98   | CONTIG22 | 40280  | 40780  | 3.09 | 0.00E+00 | transcription_start_site | + | 43714  | 43714  | -3184 | 9260 | AN1419 |
| 98   | CONTIG22 | 40280  | 40780  | 3.09 | 0.00E+00 | transcription_start_site | + | 44144  | 44144  | -3614 | 9261 | AN1419 |
| 98   | CONTIG22 | 40280  | 40780  | 3.09 | 0.00E+00 | transcription_start_site | + | 44430  | 44430  | -3900 | 9262 | AN1419 |
| 1281 | CONTIG22 | 42245  | 43262  | 1.46 | 3.02E-02 | transcription_start_site | + | 43443  | 43443  | -689  | 9259 | AN1419 |
| 1281 | CONTIG22 | 42245  | 43262  | 1.46 | 3.02E-02 | transcription_start_site | + | 43714  | 43714  | -960  | 9260 | AN1419 |
| 1281 | CONTIG22 | 42245  | 43262  | 1.46 | 3.02E-02 | transcription_start_site | + | 44144  | 44144  | -1390 | 9261 | AN1419 |
| 1281 | CONTIG22 | 42245  | 43262  | 1.46 | 3.02E-02 | transcription_start_site | + | 44430  | 44430  | -1676 | 9262 | AN1419 |
| 958  | CONTIG22 | 52206  | 52475  | 1.76 | 2.63E-02 | transcription_start_site | - | 47928  | 47928  | -4412 | 9263 | AN1420 |
| 958  | CONTIG22 | 52206  | 52475  | 1.76 | 2.63E-02 | transcription_start_site | - | 47474  | 47474  | -4866 | 9264 | AN1420 |
| 958  | CONTIG22 | 52206  | 52475  | 1.76 | 2.63E-02 | transcription_start_site | + | 51744  | 51744  | 596   | 9269 | AN1422 |
| 958  | CONTIG22 | 52206  | 52475  | 1.76 | 2.63E-02 | transcription_start_site | + | 51577  | 51577  | 763   | 9268 | AN1422 |
| 958  | CONTIG22 | 52206  | 52475  | 1.76 | 2.63E-02 | transcription_start_site | + | 51244  | 51244  | 1096  | 9267 | AN1422 |
| 958  | CONTIG22 | 52206  | 52475  | 1.76 | 2.63E-02 | transcription_start_site | + | 53009  | 53009  | -668  | 9270 | AN1423 |
| 958  | CONTIG22 | 52206  | 52475  | 1.76 | 2.63E-02 | transcription_start_site | + | 53420  | 53420  | -1079 | 9271 | AN1423 |
| 958  | CONTIG22 | 52206  | 52475  | 1.76 | 2.63E-02 | transcription_start_site | + | 53487  | 53487  | -1146 | 9272 | AN1423 |
| 958  | CONTIG22 | 52206  | 52475  | 1.76 | 2.63E-02 | transcription_start_site | + | 55246  | 55246  | -2905 | 9273 | AN1424 |
| 306  | CONTIG22 | 58964  | 59536  | 2.62 | 1.62E-03 | transcription_start_site | + | 61870  | 61870  | -2620 | 9274 | AN1425 |
| 306  | CONTIG22 | 58964  | 59536  | 2.62 | 1.62E-03 | transcription_start_site | + | 61995  | 61995  | -2745 | 9275 | AN1425 |
| 306  | CONTIG22 | 58964  | 59536  | 2.62 | 1.62E-03 | transcription_start_site | + | 62247  | 62247  | -2997 | 9276 | AN1425 |
| 307  | CONTIG22 | 60919  | 61403  | 2.62 | 1.62E-03 | transcription_start_site | + | 61870  | 61870  | -709  | 9274 | AN1425 |
| 307  | CONTIG22 | 60919  | 61403  | 2.62 | 1.62E-03 | transcription_start_site | + | 61995  | 61995  | -834  | 9275 | AN1425 |
| 307  | CONTIG22 | 60919  | 61403  | 2.62 | 1.62E-03 | transcription_start_site | + | 62247  | 62247  | -1086 | 9276 | AN1425 |
| 1480 | CONTIG22 | 57396  | 58560  | 1.29 | 5.49E-02 | transcription_start_site | + | 61870  | 61870  | -3892 | 9274 | AN1425 |
| 1480 | CONTIG22 | 57396  | 58560  | 1.29 | 5.49E-02 | transcription_start_site | + | 61995  | 61995  | -4017 | 9275 | AN1425 |
| 1480 | CONTIG22 | 57396  | 58560  | 1.29 | 5.49E-02 | transcription_start_site | + | 62247  | 62247  | -4269 | 9276 | AN1425 |
| 307  | CONTIG22 | 60919  | 61403  | 2.62 | 1.62E-03 | transcription_start_site | + | 65376  | 65376  | -4215 | 9277 | AN1426 |
| 307  | CONTIG22 | 60919  | 61403  | 2.62 | 1.62E-03 | transcription_start_site | + | 65784  | 65784  | -4623 | 9278 | AN1426 |
| 307  | CONTIG22 | 60919  | 61403  | 2.62 | 1.62E-03 | transcription_start_site | + | 65941  | 65941  | -4780 | 9279 | AN1426 |
| 307  | CONTIG22 | 60919  | 61403  | 2.62 | 1.62E-03 | transcription_start_site | + | 66111  | 66111  | -4950 | 9280 | AN1426 |
| 20   | CONTIG22 | 70443  | 70942  | 3.44 | 0.00E+00 | transcription_start_site | - | 69542  | 69542  | -1150 | 9285 | AN1427 |
| 20   | CONTIG22 | 70443  | 70942  | 3.44 | 0.00E+00 | transcription_start_site | - | 68909  | 68909  | -1783 | 9286 | AN1427 |
| 20   | CONTIG22 | 70443  | 70942  | 3.44 | 0.00E+00 | transcription_start_site | - | 68243  | 68243  | -2449 | 9287 | AN1427 |
| 20   | CONTIG22 | 70443  | 70942  | 3.44 | 0.00E+00 | transcription_start_site | - | 68094  | 68094  | -2598 | 9288 | AN1427 |
| 20   | CONTIG22 | 70443  | 70942  | 3.44 | 0.00E+00 | transcription_start_site | + | 71217  | 71217  | -524  | 9289 | AN1428 |
| 624  | CONTIG22 | 74568  | 75667  | 2.15 | 1.10E-03 | transcription_start_site | - | 74533  | 74533  | -584  | 9290 | AN1429 |
| 624  | CONTIG22 | 74568  | 75667  | 2.15 | 1.10E-03 | transcription_start_site | - | 74234  | 74234  | -883  | 9291 | AN1429 |
| 1088 | CONTIG22 | 77853  | 78277  | 1.63 | 3.70E-02 | transcription_start_site | - | 74533  | 74533  | -3532 | 9290 | AN1429 |
| 1088 | CONTIG22 | 77853  | 78277  | 1.63 | 3.70E-02 | transcription_start_site | - | 74234  | 74234  | -3831 | 9291 | AN1429 |
| 20   | CONTIG22 | 70443  | 70942  | 3.44 | 0.00E+00 | transcription_start_site | + | 75595  | 75595  | -4902 | 9292 | AN1430 |
| 624  | CONTIG22 | 74568  | 75667  | 2.15 | 1.10E-03 | transcription_start_site | + | 75595  | 75595  | -477  | 9292 | AN1430 |
| 624  | CONTIG22 | 74568  | 75667  | 2.15 | 1.10E-03 | transcription_start_site | + | 76144  | 76144  | -1026 | 9293 | AN1430 |
| 624  | CONTIG22 | 74568  | 75667  | 2.15 | 1.10E-03 | transcription_start_site | + | 78413  | 78413  | -3295 | 9294 | AN1431 |
| 624  | CONTIG22 | 74568  | 75667  | 2.15 | 1.10E-03 | transcription_start_site | + | 79295  | 79295  | -4177 | 9295 | AN1431 |
| 1088 | CONTIG22 | 77853  | 78277  | 1.63 | 3.70E-02 | transcription_start_site | + | 78413  | 78413  | -348  | 9294 | AN1431 |
| 1088 | CONTIG22 | 77853  | 78277  | 1.63 | 3.70E-02 | transcription_start_site | + | 79295  | 79295  | -1230 | 9295 | AN1431 |
| 1088 | CONTIG22 | 77853  | 78277  | 1.63 | 3.70E-02 | transcription_start_site | + | 81902  | 81902  | -3837 | 9298 | AN1433 |
| 1088 | CONTIG22 | 77853  | 78277  | 1.63 | 3.70E-02 | transcription_start_site | + | 82169  | 82169  | -4104 | 9299 | AN1433 |
| 1088 | CONTIG22 | 77853  | 78277  | 1.63 | 3.70E-02 | transcription_start_site | + | 82578  | 82578  | -4513 | 9300 | AN1433 |
| 495  | CONTIG22 | 129393 | 131012 | 2.32 | 0.00E+00 | transcription_start_site | - | 125192 | 125192 | -5010 | 9324 | AN1446 |
| 495  | CONTIG22 | 129393 | 131012 | 2.32 | 0.00E+00 | transcription_start_site | - | 124991 | 124991 | -5211 | 9325 | AN1446 |
| 495  | CONTIG22 | 129393 | 131012 | 2.32 | 0.00E+00 | transcription_start_site | - | 124853 | 124853 | -5349 | 9326 | AN1446 |
| 495  | CONTIG22 | 129393 | 131012 | 2.32 | 0.00E+00 | transcription_start_site | - | 126913 | 126913 | -3289 | 9328 | AN1447 |
| 495  | CONTIG22 | 129393 | 131012 | 2.32 | 0.00E+00 | transcription_start_site | - | 126846 | 126846 | -3356 | 9329 | AN1447 |



|      |          |        |        |      |          |                          |   |        |        |       |      |        |
|------|----------|--------|--------|------|----------|--------------------------|---|--------|--------|-------|------|--------|
| 495  | CONTIG22 | 129393 | 131012 | 2.32 | 0.00E+00 | transcription_start_site | - | 126674 | 126674 | -3528 | 9330 | AN1447 |
| 495  | CONTIG22 | 129393 | 131012 | 2.32 | 0.00E+00 | transcription_start_site | - | 126513 | 126513 | -3689 | 9331 | AN1447 |
| 495  | CONTIG22 | 129393 | 131012 | 2.32 | 0.00E+00 | transcription_start_site | - | 126374 | 126374 | -3828 | 9332 | AN1447 |
| 495  | CONTIG22 | 129393 | 131012 | 2.32 | 0.00E+00 | transcription_start_site | - | 126264 | 126264 | -3938 | 9333 | AN1447 |
| 495  | CONTIG22 | 129393 | 131012 | 2.32 | 0.00E+00 | transcription_start_site | - | 125865 | 125865 | -4337 | 9334 | AN1447 |
| 495  | CONTIG22 | 129393 | 131012 | 2.32 | 0.00E+00 | transcription_start_site | - | 125695 | 125695 | -4507 | 9335 | AN1447 |
| 495  | CONTIG22 | 129393 | 131012 | 2.32 | 0.00E+00 | transcription_start_site | + | 129138 | 129138 | 1064  | 9337 | AN1448 |
| 495  | CONTIG22 | 129393 | 131012 | 2.32 | 0.00E+00 | transcription_start_site | + | 131291 | 131291 | -1088 | 9338 | AN1449 |
| 495  | CONTIG22 | 129393 | 131012 | 2.32 | 0.00E+00 | transcription_start_site | + | 131557 | 131557 | -1354 | 9339 | AN1449 |
| 840  | CONTIG22 | 159534 | 159808 | 1.89 | 1.80E-02 | transcription_start_site | - | 158275 | 158275 | -1396 | 9368 | AN1457 |
| 840  | CONTIG22 | 159534 | 159808 | 1.89 | 1.80E-02 | transcription_start_site | - | 157217 | 157217 | -2454 | 9369 | AN1457 |
| 840  | CONTIG22 | 159534 | 159808 | 1.89 | 1.80E-02 | transcription_start_site | - | 156704 | 156704 | -2967 | 9370 | AN1457 |
| 840  | CONTIG22 | 159534 | 159808 | 1.89 | 1.80E-02 | transcription_start_site | - | 156563 | 156563 | -3108 | 9371 | AN1457 |
| 840  | CONTIG22 | 159534 | 159808 | 1.89 | 1.80E-02 | transcription_start_site | - | 156464 | 156464 | -3207 | 9372 | AN1457 |
| 840  | CONTIG22 | 159534 | 159808 | 1.89 | 1.80E-02 | transcription_start_site | + | 160296 | 160296 | -625  | 9373 | AN1458 |
| 840  | CONTIG22 | 159534 | 159808 | 1.89 | 1.80E-02 | transcription_start_site | + | 161887 | 161887 | -2216 | 9374 | AN1459 |
| 840  | CONTIG22 | 159534 | 159808 | 1.89 | 1.80E-02 | transcription_start_site | + | 162171 | 162171 | -2500 | 9375 | AN1459 |
| 840  | CONTIG22 | 159534 | 159808 | 1.89 | 1.80E-02 | transcription_start_site | + | 163865 | 163865 | -4194 | 9376 | AN1459 |
| 1128 | CONTIG22 | 174304 | 174651 | 1.59 | 4.20E-02 | transcription_start_site | + | 177091 | 177091 | -2613 | 9387 | AN1463 |
| 1128 | CONTIG22 | 174304 | 174651 | 1.59 | 4.20E-02 | transcription_start_site | + | 177201 | 177201 | -2723 | 9388 | AN1463 |
| 1128 | CONTIG22 | 174304 | 174651 | 1.59 | 4.20E-02 | transcription_start_site | + | 177634 | 177634 | -3156 | 9389 | AN1463 |
| 1128 | CONTIG22 | 174304 | 174651 | 1.59 | 4.20E-02 | transcription_start_site | + | 177844 | 177844 | -3366 | 9390 | AN1463 |
| 1128 | CONTIG22 | 174304 | 174651 | 1.59 | 4.20E-02 | transcription_start_site | + | 178075 | 178075 | -3597 | 9391 | AN1463 |
| 1128 | CONTIG22 | 174304 | 174651 | 1.59 | 4.20E-02 | transcription_start_site | + | 178280 | 178280 | -3802 | 9392 | AN1463 |
| 219  | CONTIG22 | 183468 | 183805 | 2.79 | 7.06E-04 | transcription_start_site | + | 184604 | 184604 | -967  | 9393 | AN1465 |
| 219  | CONTIG22 | 183468 | 183805 | 2.79 | 7.06E-04 | transcription_start_site | + | 185073 | 185073 | -1436 | 9394 | AN1465 |
| 219  | CONTIG22 | 183468 | 183805 | 2.79 | 7.06E-04 | transcription_start_site | + | 185659 | 185659 | -2022 | 9395 | AN1465 |
| 219  | CONTIG22 | 183468 | 183805 | 2.79 | 7.06E-04 | transcription_start_site | + | 187696 | 187696 | -4059 | 9396 | AN1466 |
| 219  | CONTIG22 | 183468 | 183805 | 2.79 | 7.06E-04 | transcription_start_site | + | 187980 | 187980 | -4343 | 9397 | AN1466 |
| 219  | CONTIG22 | 183468 | 183805 | 2.79 | 7.06E-04 | transcription_start_site | + | 188521 | 188521 | -4884 | 9398 | AN1466 |
| 442  | CONTIG22 | 201301 | 201818 | 2.4  | 4.01E-03 | transcription_start_site | - | 201617 | 201617 | 57    | 9408 | AN1471 |
| 442  | CONTIG22 | 201301 | 201818 | 2.4  | 4.01E-03 | transcription_start_site | - | 201057 | 201057 | -502  | 9409 | AN1471 |
| 442  | CONTIG22 | 201301 | 201818 | 2.4  | 4.01E-03 | transcription_start_site | + | 203772 | 203772 | -2212 | 9410 | AN1472 |
| 1482 | CONTIG22 | 213228 | 213502 | 1.29 | 9.60E-02 | transcription_start_site | - | 209367 | 209367 | -3998 | 9414 | AN1474 |
| 1482 | CONTIG22 | 213228 | 213502 | 1.29 | 9.60E-02 | transcription_start_site | - | 212846 | 212846 | -519  | 9415 | AN1475 |
| 1876 | CONTIG22 | 259580 | 259868 | 1.03 | 1.97E-01 | transcription_start_site | + | 262852 | 262852 | -3128 | 9447 | AN1489 |
| 1876 | CONTIG22 | 259580 | 259868 | 1.03 | 1.97E-01 | transcription_start_site | + | 263154 | 263154 | -3430 | 9448 | AN1489 |
| 107  | CONTIG23 | 24383  | 24653  | 3.07 | 2.06E-04 | transcription_start_site | - | 21224  | 21224  | -3294 | 9480 | AN1500 |
| 107  | CONTIG23 | 24383  | 24653  | 3.07 | 2.06E-04 | transcription_start_site | - | 20733  | 20733  | -3785 | 9481 | AN1500 |
| 1071 | CONTIG23 | 28591  | 28870  | 1.65 | 4.78E-02 | transcription_start_site | - | 27895  | 27895  | -835  | 9482 | AN1501 |
| 1071 | CONTIG23 | 28591  | 28870  | 1.65 | 4.78E-02 | transcription_start_site | - | 27385  | 27385  | -1345 | 9483 | AN1501 |
| 1071 | CONTIG23 | 28591  | 28870  | 1.65 | 4.78E-02 | transcription_start_site | - | 27167  | 27167  | -1563 | 9484 | AN1501 |
| 1071 | CONTIG23 | 28591  | 28870  | 1.65 | 4.78E-02 | transcription_start_site | - | 26661  | 26661  | -2069 | 9485 | AN1501 |
| 1071 | CONTIG23 | 28591  | 28870  | 1.65 | 4.78E-02 | transcription_start_site | - | 26097  | 26097  | -2633 | 9486 | AN1501 |
| 231  | CONTIG23 | 34446  | 34775  | 2.75 | 1.77E-03 | transcription_start_site | - | 33842  | 33842  | -768  | 9487 | AN1502 |
| 231  | CONTIG23 | 34446  | 34775  | 2.75 | 1.77E-03 | transcription_start_site | + | 37970  | 37970  | -3359 | 9489 | AN1504 |
| 231  | CONTIG23 | 34446  | 34775  | 2.75 | 1.77E-03 | transcription_start_site | + | 38778  | 38778  | -4167 | 9490 | AN1504 |
| 231  | CONTIG23 | 34446  | 34775  | 2.75 | 1.77E-03 | transcription_start_site | + | 39731  | 39731  | -5120 | 9491 | AN1504 |
| 1369 | CONTIG23 | 43204  | 43639  | 1.38 | 9.60E-02 | transcription_start_site | - | 42909  | 42909  | -512  | 9492 | AN1505 |
| 1369 | CONTIG23 | 43204  | 43639  | 1.38 | 9.60E-02 | transcription_start_site | - | 42631  | 42631  | -790  | 9493 | AN1505 |
| 1369 | CONTIG23 | 43204  | 43639  | 1.38 | 9.60E-02 | transcription_start_site | - | 42463  | 42463  | -958  | 9494 | AN1505 |
| 1369 | CONTIG23 | 43204  | 43639  | 1.38 | 9.60E-02 | transcription_start_site | - | 42078  | 42078  | -1343 | 9495 | AN1505 |
| 1369 | CONTIG23 | 43204  | 43639  | 1.38 | 9.60E-02 | transcription_start_site | - | 41879  | 41879  | -1542 | 9496 | AN1505 |
| 1369 | CONTIG23 | 43204  | 43639  | 1.38 | 9.60E-02 | transcription_start_site | - | 41609  | 41609  | -1812 | 9497 | AN1505 |
| 1369 | CONTIG23 | 43204  | 43639  | 1.38 | 9.60E-02 | transcription_start_site | + | 44167  | 44167  | -745  | 9498 | AN1506 |
| 1369 | CONTIG23 | 43204  | 43639  | 1.38 | 9.60E-02 | transcription_start_site | + | 44396  | 44396  | -974  | 9499 | AN1506 |
| 1369 | CONTIG23 | 43204  | 43639  | 1.38 | 9.60E-02 | transcription_start_site | + | 45084  | 45084  | -1662 | 9500 | AN1506 |

|      |          |       |       |      |          |                          |   |       |       |       |      |        |
|------|----------|-------|-------|------|----------|--------------------------|---|-------|-------|-------|------|--------|
| 1369 | CONTIG23 | 43204 | 43639 | 1.38 | 9.60E-02 | transcription_start_site | + | 45360 | 45360 | -1938 | 9501 | AN1506 |
| 1369 | CONTIG23 | 43204 | 43639 | 1.38 | 9.60E-02 | transcription_start_site | + | 45507 | 45507 | -2085 | 9502 | AN1506 |
| 591  | CONTIG23 | 49737 | 50227 | 2.2  | 4.22E-03 | transcription_start_site | - | 46778 | 46778 | -3204 | 9503 | AN1507 |
| 591  | CONTIG23 | 49737 | 50227 | 2.2  | 4.22E-03 | transcription_start_site | - | 46697 | 46697 | -3285 | 9504 | AN1507 |
| 591  | CONTIG23 | 49737 | 50227 | 2.2  | 4.22E-03 | transcription_start_site | - | 48214 | 48214 | -1768 | 9505 | AN1508 |
| 591  | CONTIG23 | 49737 | 50227 | 2.2  | 4.22E-03 | transcription_start_site | - | 47911 | 47911 | -2071 | 9506 | AN1508 |
| 591  | CONTIG23 | 49737 | 50227 | 2.2  | 4.22E-03 | transcription_start_site | - | 47751 | 47751 | -2231 | 9507 | AN1508 |
| 591  | CONTIG23 | 49737 | 50227 | 2.2  | 4.22E-03 | transcription_start_site | - | 47632 | 47632 | -2350 | 9508 | AN1508 |
| 591  | CONTIG23 | 49737 | 50227 | 2.2  | 4.22E-03 | transcription_start_site | + | 50799 | 50799 | -817  | 9509 | AN1509 |
| 591  | CONTIG23 | 49737 | 50227 | 2.2  | 4.22E-03 | transcription_start_site | + | 51434 | 51434 | -1452 | 9510 | AN1509 |
| 591  | CONTIG23 | 49737 | 50227 | 2.2  | 4.22E-03 | transcription_start_site | + | 53235 | 53235 | -3253 | 9511 | AN1510 |
| 591  | CONTIG23 | 49737 | 50227 | 2.2  | 4.22E-03 | transcription_start_site | + | 53399 | 53399 | -3417 | 9512 | AN1510 |
| 591  | CONTIG23 | 49737 | 50227 | 2.2  | 4.22E-03 | transcription_start_site | + | 55028 | 55028 | -5046 | 9513 | AN1510 |
| 92   | CONTIG24 | 16892 | 17226 | 3.1  | 0.00E+00 | transcription_start_site | - | 12431 | 12431 | -4628 | 9525 | AN1517 |
| 92   | CONTIG24 | 16892 | 17226 | 3.1  | 0.00E+00 | transcription_start_site | - | 12367 | 12367 | -4692 | 9526 | AN1517 |
| 92   | CONTIG24 | 16892 | 17226 | 3.1  | 0.00E+00 | transcription_start_site | - | 15908 | 15908 | -1151 | 9528 | AN1518 |
| 92   | CONTIG24 | 16892 | 17226 | 3.1  | 0.00E+00 | transcription_start_site | - | 15731 | 15731 | -1328 | 9529 | AN1518 |
| 92   | CONTIG24 | 16892 | 17226 | 3.1  | 0.00E+00 | transcription_start_site | - | 15265 | 15265 | -1794 | 9530 | AN1518 |
| 92   | CONTIG24 | 16892 | 17226 | 3.1  | 0.00E+00 | transcription_start_site | - | 14987 | 14987 | -2072 | 9531 | AN1518 |
| 92   | CONTIG24 | 16892 | 17226 | 3.1  | 0.00E+00 | transcription_start_site | - | 14902 | 14902 | -2157 | 9532 | AN1518 |
| 92   | CONTIG24 | 16892 | 17226 | 3.1  | 0.00E+00 | transcription_start_site | - | 14079 | 14079 | -2980 | 9533 | AN1518 |
| 92   | CONTIG24 | 16892 | 17226 | 3.1  | 0.00E+00 | transcription_start_site | - | 13315 | 13315 | -3744 | 9534 | AN1518 |
| 92   | CONTIG24 | 16892 | 17226 | 3.1  | 0.00E+00 | transcription_start_site | + | 18263 | 18263 | -1204 | 9535 | AN1519 |
| 92   | CONTIG24 | 16892 | 17226 | 3.1  | 0.00E+00 | transcription_start_site | + | 18574 | 18574 | -1515 | 9536 | AN1519 |
| 92   | CONTIG24 | 16892 | 17226 | 3.1  | 0.00E+00 | transcription_start_site | + | 19727 | 19727 | -2668 | 9537 | AN1519 |
| 92   | CONTIG24 | 16892 | 17226 | 3.1  | 0.00E+00 | transcription_start_site | + | 20027 | 20027 | -2968 | 9538 | AN1519 |
| 1193 | CONTIG24 | 23943 | 24427 | 1.53 | 3.01E-02 | transcription_start_site | - | 23979 | 23979 | -206  | 9539 | AN1520 |
| 1193 | CONTIG24 | 23943 | 24427 | 1.53 | 3.01E-02 | transcription_start_site | - | 23603 | 23603 | -582  | 9540 | AN1520 |
| 1293 | CONTIG24 | 27618 | 27967 | 1.45 | 3.70E-02 | transcription_start_site | - | 23979 | 23979 | -3813 | 9539 | AN1520 |
| 1293 | CONTIG24 | 27618 | 27967 | 1.45 | 3.70E-02 | transcription_start_site | - | 23603 | 23603 | -4189 | 9540 | AN1520 |
| 2193 | CONTIG24 | 26118 | 27427 | 0.8  | 1.64E-01 | transcription_start_site | - | 23979 | 23979 | -2793 | 9539 | AN1520 |
| 2193 | CONTIG24 | 26118 | 27427 | 0.8  | 1.64E-01 | transcription_start_site | - | 23603 | 23603 | -3169 | 9540 | AN1520 |
| 1193 | CONTIG24 | 23943 | 24427 | 1.53 | 3.01E-02 | transcription_start_site | - | 24969 | 24969 | 784   | 9544 | AN1521 |
| 1193 | CONTIG24 | 23943 | 24427 | 1.53 | 3.01E-02 | transcription_start_site | - | 25201 | 25201 | 1016  | 9543 | AN1521 |
| 1193 | CONTIG24 | 23943 | 24427 | 1.53 | 3.01E-02 | transcription_start_site | - | 25342 | 25342 | 1157  | 9542 | AN1521 |
| 1293 | CONTIG24 | 27618 | 27967 | 1.45 | 3.70E-02 | transcription_start_site | - | 25640 | 25640 | -2152 | 9541 | AN1521 |
| 1293 | CONTIG24 | 27618 | 27967 | 1.45 | 3.70E-02 | transcription_start_site | - | 25342 | 25342 | -2450 | 9542 | AN1521 |
| 1293 | CONTIG24 | 27618 | 27967 | 1.45 | 3.70E-02 | transcription_start_site | - | 25201 | 25201 | -2591 | 9543 | AN1521 |
| 1293 | CONTIG24 | 27618 | 27967 | 1.45 | 3.70E-02 | transcription_start_site | - | 24969 | 24969 | -2823 | 9544 | AN1521 |
| 2193 | CONTIG24 | 26118 | 27427 | 0.8  | 1.64E-01 | transcription_start_site | - | 25640 | 25640 | -1132 | 9541 | AN1521 |
| 2193 | CONTIG24 | 26118 | 27427 | 0.8  | 1.64E-01 | transcription_start_site | - | 25342 | 25342 | -1430 | 9542 | AN1521 |
| 2193 | CONTIG24 | 26118 | 27427 | 0.8  | 1.64E-01 | transcription_start_site | - | 25201 | 25201 | -1571 | 9543 | AN1521 |
| 2193 | CONTIG24 | 26118 | 27427 | 0.8  | 1.64E-01 | transcription_start_site | - | 24969 | 24969 | -1803 | 9544 | AN1521 |
| 1193 | CONTIG24 | 23943 | 24427 | 1.53 | 3.01E-02 | transcription_start_site | + | 26411 | 26411 | -2226 | 9545 | AN1522 |
| 1193 | CONTIG24 | 23943 | 24427 | 1.53 | 3.01E-02 | transcription_start_site | + | 26582 | 26582 | -2397 | 9546 | AN1522 |
| 1193 | CONTIG24 | 23943 | 24427 | 1.53 | 3.01E-02 | transcription_start_site | + | 26705 | 26705 | -2520 | 9547 | AN1522 |
| 1293 | CONTIG24 | 27618 | 27967 | 1.45 | 3.70E-02 | transcription_start_site | + | 26705 | 26705 | 1087  | 9547 | AN1522 |
| 2193 | CONTIG24 | 26118 | 27427 | 0.8  | 1.64E-01 | transcription_start_site | + | 26705 | 26705 | 67    | 9547 | AN1522 |
| 2193 | CONTIG24 | 26118 | 27427 | 0.8  | 1.64E-01 | transcription_start_site | + | 26582 | 26582 | 190   | 9546 | AN1522 |
| 2193 | CONTIG24 | 26118 | 27427 | 0.8  | 1.64E-01 | transcription_start_site | + | 26411 | 26411 | 361   | 9545 | AN1522 |
| 1193 | CONTIG24 | 23943 | 24427 | 1.53 | 3.01E-02 | transcription_start_site | + | 28102 | 28102 | -3917 | 9548 | AN1523 |
| 1193 | CONTIG24 | 23943 | 24427 | 1.53 | 3.01E-02 | transcription_start_site | + | 28353 | 28353 | -4168 | 9549 | AN1523 |
| 1193 | CONTIG24 | 23943 | 24427 | 1.53 | 3.01E-02 | transcription_start_site | + | 28659 | 28659 | -4474 | 9550 | AN1523 |
| 1193 | CONTIG24 | 23943 | 24427 | 1.53 | 3.01E-02 | transcription_start_site | + | 28772 | 28772 | -4587 | 9551 | AN1523 |
| 1193 | CONTIG24 | 23943 | 24427 | 1.53 | 3.01E-02 | transcription_start_site | + | 28955 | 28955 | -4770 | 9552 | AN1523 |
| 1293 | CONTIG24 | 27618 | 27967 | 1.45 | 3.70E-02 | transcription_start_site | + | 28102 | 28102 | -309  | 9548 | AN1523 |
| 1293 | CONTIG24 | 27618 | 27967 | 1.45 | 3.70E-02 | transcription_start_site | + | 28353 | 28353 | -560  | 9549 | AN1523 |

|      |          |       |       |      |          |                          |   |       |       |       |      |        |
|------|----------|-------|-------|------|----------|--------------------------|---|-------|-------|-------|------|--------|
| 1293 | CONTIG24 | 27618 | 27967 | 1.45 | 3.70E-02 | transcription_start_site | + | 28659 | 28659 | -866  | 9550 | AN1523 |
| 1293 | CONTIG24 | 27618 | 27967 | 1.45 | 3.70E-02 | transcription_start_site | + | 28772 | 28772 | -979  | 9551 | AN1523 |
| 1293 | CONTIG24 | 27618 | 27967 | 1.45 | 3.70E-02 | transcription_start_site | + | 28955 | 28955 | -1162 | 9552 | AN1523 |
| 2193 | CONTIG24 | 26118 | 27427 | 0.8  | 1.64E-01 | transcription_start_site | + | 28102 | 28102 | -1329 | 9548 | AN1523 |
| 2193 | CONTIG24 | 26118 | 27427 | 0.8  | 1.64E-01 | transcription_start_site | + | 28353 | 28353 | -1580 | 9549 | AN1523 |
| 2193 | CONTIG24 | 26118 | 27427 | 0.8  | 1.64E-01 | transcription_start_site | + | 28659 | 28659 | -1886 | 9550 | AN1523 |
| 2193 | CONTIG24 | 26118 | 27427 | 0.8  | 1.64E-01 | transcription_start_site | + | 28772 | 28772 | -1999 | 9551 | AN1523 |
| 2193 | CONTIG24 | 26118 | 27427 | 0.8  | 1.64E-01 | transcription_start_site | + | 28955 | 28955 | -2182 | 9552 | AN1523 |
| 1293 | CONTIG24 | 27618 | 27967 | 1.45 | 3.70E-02 | transcription_start_site | + | 31081 | 31081 | -3288 | 9553 | AN1524 |
| 1293 | CONTIG24 | 27618 | 27967 | 1.45 | 3.70E-02 | transcription_start_site | + | 31437 | 31437 | -3644 | 9554 | AN1524 |
| 1293 | CONTIG24 | 27618 | 27967 | 1.45 | 3.70E-02 | transcription_start_site | + | 32128 | 32128 | -4335 | 9555 | AN1524 |
| 1293 | CONTIG24 | 27618 | 27967 | 1.45 | 3.70E-02 | transcription_start_site | + | 32272 | 32272 | -4479 | 9556 | AN1524 |
| 2193 | CONTIG24 | 26118 | 27427 | 0.8  | 1.64E-01 | transcription_start_site | + | 31081 | 31081 | -4308 | 9553 | AN1524 |
| 2193 | CONTIG24 | 26118 | 27427 | 0.8  | 1.64E-01 | transcription_start_site | + | 31437 | 31437 | -4664 | 9554 | AN1524 |
| 2193 | CONTIG24 | 26118 | 27427 | 0.8  | 1.64E-01 | transcription_start_site | + | 32128 | 32128 | -5355 | 9555 | AN1524 |
| 2193 | CONTIG24 | 26118 | 27427 | 0.8  | 1.64E-01 | transcription_start_site | + | 32272 | 32272 | -5499 | 9556 | AN1524 |
| 2047 | CONTIG24 | 35637 | 36073 | 0.92 | 1.97E-01 | transcription_start_site | - | 33485 | 33485 | -2370 | 9557 | AN1525 |
| 2047 | CONTIG24 | 35637 | 36073 | 0.92 | 1.97E-01 | transcription_start_site | - | 33317 | 33317 | -2538 | 9558 | AN1525 |
| 2047 | CONTIG24 | 35637 | 36073 | 0.92 | 1.97E-01 | transcription_start_site | - | 32968 | 32968 | -2887 | 9559 | AN1525 |
| 2047 | CONTIG24 | 35637 | 36073 | 0.92 | 1.97E-01 | transcription_start_site | + | 34650 | 34650 | 1205  | 9564 | AN1526 |
| 2047 | CONTIG24 | 35637 | 36073 | 0.92 | 1.97E-01 | transcription_start_site | - | 35849 | 35849 | -6    | 9565 | AN1527 |
| 2047 | CONTIG24 | 35637 | 36073 | 0.92 | 1.97E-01 | transcription_start_site | - | 35159 | 35159 | -696  | 9566 | AN1527 |
| 2047 | CONTIG24 | 35637 | 36073 | 0.92 | 1.97E-01 | transcription_start_site | + | 36123 | 36123 | -268  | 9567 | AN1528 |
| 2047 | CONTIG24 | 35637 | 36073 | 0.92 | 1.97E-01 | transcription_start_site | + | 36243 | 36243 | -388  | 9568 | AN1528 |
| 2047 | CONTIG24 | 35637 | 36073 | 0.92 | 1.97E-01 | transcription_start_site | + | 36597 | 36597 | -742  | 9569 | AN1528 |
| 2047 | CONTIG24 | 35637 | 36073 | 0.92 | 1.97E-01 | transcription_start_site | + | 36784 | 36784 | -929  | 9570 | AN1528 |
| 2047 | CONTIG24 | 35637 | 36073 | 0.92 | 1.97E-01 | transcription_start_site | + | 36932 | 36932 | -1077 | 9571 | AN1528 |
| 2047 | CONTIG24 | 35637 | 36073 | 0.92 | 1.97E-01 | transcription_start_site | + | 37173 | 37173 | -1318 | 9572 | AN1528 |
| 2047 | CONTIG24 | 35637 | 36073 | 0.92 | 1.97E-01 | transcription_start_site | + | 38124 | 38124 | -2269 | 9573 | AN1528 |
| 1362 | CONTIG25 | 1966  | 2320  | 1.38 | 1.37E-02 | transcription_start_site | - | 1406  | 1406  | -737  | 9577 | AN1531 |
| 1362 | CONTIG25 | 1966  | 2320  | 1.38 | 1.37E-02 | transcription_start_site | - | 1105  | 1105  | -1038 | 9578 | AN1531 |
| 1362 | CONTIG25 | 1966  | 2320  | 1.38 | 1.37E-02 | transcription_start_site | - | 3035  | 3035  | 892   | 9580 | AN1532 |
| 1362 | CONTIG25 | 1966  | 2320  | 1.38 | 1.37E-02 | transcription_start_site | - | 3223  | 3223  | 1080  | 9579 | AN1532 |
| 2321 | CONTIG25 | 7071  | 8230  | 0.63 | 6.32E-02 | transcription_start_site | - | 3223  | 3223  | -4427 | 9579 | AN1532 |
| 2321 | CONTIG25 | 7071  | 8230  | 0.63 | 6.32E-02 | transcription_start_site | - | 3035  | 3035  | -4615 | 9580 | AN1532 |
| 1329 | CONTIG25 | 8631  | 9125  | 1.41 | 1.25E-02 | transcription_start_site | - | 7127  | 7127  | -1751 | 9581 | AN1533 |
| 1329 | CONTIG25 | 8631  | 9125  | 1.41 | 1.25E-02 | transcription_start_site | - | 6668  | 6668  | -2210 | 9582 | AN1533 |
| 1329 | CONTIG25 | 8631  | 9125  | 1.41 | 1.25E-02 | transcription_start_site | - | 6398  | 6398  | -2480 | 9583 | AN1533 |
| 1329 | CONTIG25 | 8631  | 9125  | 1.41 | 1.25E-02 | transcription_start_site | - | 5200  | 5200  | -3678 | 9584 | AN1533 |
| 2321 | CONTIG25 | 7071  | 8230  | 0.63 | 6.32E-02 | transcription_start_site | - | 7127  | 7127  | -523  | 9581 | AN1533 |
| 2321 | CONTIG25 | 7071  | 8230  | 0.63 | 6.32E-02 | transcription_start_site | - | 6668  | 6668  | -982  | 9582 | AN1533 |
| 2321 | CONTIG25 | 7071  | 8230  | 0.63 | 6.32E-02 | transcription_start_site | - | 6398  | 6398  | -1252 | 9583 | AN1533 |
| 2321 | CONTIG25 | 7071  | 8230  | 0.63 | 6.32E-02 | transcription_start_site | - | 5200  | 5200  | -2450 | 9584 | AN1533 |
| 1329 | CONTIG25 | 8631  | 9125  | 1.41 | 1.25E-02 | transcription_start_site | + | 8277  | 8277  | 601   | 9588 | AN1534 |
| 1329 | CONTIG25 | 8631  | 9125  | 1.41 | 1.25E-02 | transcription_start_site | + | 7996  | 7996  | 882   | 9587 | AN1534 |
| 2321 | CONTIG25 | 7071  | 8230  | 0.63 | 6.32E-02 | transcription_start_site | + | 7465  | 7465  | 185   | 9586 | AN1534 |
| 2321 | CONTIG25 | 7071  | 8230  | 0.63 | 6.32E-02 | transcription_start_site | + | 7370  | 7370  | 280   | 9585 | AN1534 |
| 2321 | CONTIG25 | 7071  | 8230  | 0.63 | 6.32E-02 | transcription_start_site | + | 7996  | 7996  | -345  | 9587 | AN1534 |
| 2321 | CONTIG25 | 7071  | 8230  | 0.63 | 6.32E-02 | transcription_start_site | + | 8277  | 8277  | -626  | 9588 | AN1534 |
| 1329 | CONTIG25 | 8631  | 9125  | 1.41 | 1.25E-02 | transcription_start_site | + | 9237  | 9237  | -359  | 9589 | AN1535 |
| 1329 | CONTIG25 | 8631  | 9125  | 1.41 | 1.25E-02 | transcription_start_site | + | 9842  | 9842  | -964  | 9590 | AN1535 |
| 1329 | CONTIG25 | 8631  | 9125  | 1.41 | 1.25E-02 | transcription_start_site | + | 9952  | 9952  | -1074 | 9591 | AN1535 |
| 1329 | CONTIG25 | 8631  | 9125  | 1.41 | 1.25E-02 | transcription_start_site | + | 10112 | 10112 | -1234 | 9592 | AN1535 |
| 1329 | CONTIG25 | 8631  | 9125  | 1.41 | 1.25E-02 | transcription_start_site | + | 10567 | 10567 | -1689 | 9593 | AN1535 |
| 1329 | CONTIG25 | 8631  | 9125  | 1.41 | 1.25E-02 | transcription_start_site | + | 10978 | 10978 | -2100 | 9594 | AN1535 |
| 2321 | CONTIG25 | 7071  | 8230  | 0.63 | 6.32E-02 | transcription_start_site | + | 9237  | 9237  | -1586 | 9589 | AN1535 |
| 2321 | CONTIG25 | 7071  | 8230  | 0.63 | 6.32E-02 | transcription_start_site | + | 9842  | 9842  | -2191 | 9590 | AN1535 |

|      |          |       |       |      |          |                          |   |       |       |       |      |        |
|------|----------|-------|-------|------|----------|--------------------------|---|-------|-------|-------|------|--------|
| 2321 | CONTIG25 | 7071  | 8230  | 0.63 | 6.32E-02 | transcription_start_site | + | 9952  | 9952  | -2301 | 9591 | AN1535 |
| 2321 | CONTIG25 | 7071  | 8230  | 0.63 | 6.32E-02 | transcription_start_site | + | 10112 | 10112 | -2461 | 9592 | AN1535 |
| 2321 | CONTIG25 | 7071  | 8230  | 0.63 | 6.32E-02 | transcription_start_site | + | 10567 | 10567 | -2916 | 9593 | AN1535 |
| 2321 | CONTIG25 | 7071  | 8230  | 0.63 | 6.32E-02 | transcription_start_site | + | 10978 | 10978 | -3327 | 9594 | AN1535 |
| 1330 | CONTIG25 | 17192 | 17601 | 1.41 | 1.25E-02 | transcription_start_site | - | 15886 | 15886 | -1510 | 9595 | AN1536 |
| 1330 | CONTIG25 | 17192 | 17601 | 1.41 | 1.25E-02 | transcription_start_site | - | 15030 | 15030 | -2366 | 9596 | AN1536 |
| 2247 | CONTIG25 | 24243 | 24751 | 0.75 | 1.76E-01 | transcription_start_site | - | 22706 | 22706 | -1791 | 9597 | AN1537 |
| 2247 | CONTIG25 | 24243 | 24751 | 0.75 | 1.76E-01 | transcription_start_site | - | 22609 | 22609 | -1888 | 9598 | AN1537 |
| 2247 | CONTIG25 | 24243 | 24751 | 0.75 | 1.76E-01 | transcription_start_site | - | 21818 | 21818 | -2679 | 9599 | AN1537 |
| 2247 | CONTIG25 | 24243 | 24751 | 0.75 | 1.76E-01 | transcription_start_site | - | 21669 | 21669 | -2828 | 9600 | AN1537 |
| 2247 | CONTIG25 | 24243 | 24751 | 0.75 | 1.76E-01 | transcription_start_site | - | 24333 | 24333 | -164  | 9601 | AN1538 |
| 2247 | CONTIG25 | 24243 | 24751 | 0.75 | 1.76E-01 | transcription_start_site | - | 24005 | 24005 | -492  | 9602 | AN1538 |
| 2247 | CONTIG25 | 24243 | 24751 | 0.75 | 1.76E-01 | transcription_start_site | - | 23691 | 23691 | -806  | 9603 | AN1538 |
| 2247 | CONTIG25 | 24243 | 24751 | 0.75 | 1.76E-01 | transcription_start_site | - | 23443 | 23443 | -1054 | 9604 | AN1538 |
| 2247 | CONTIG25 | 24243 | 24751 | 0.75 | 1.76E-01 | transcription_start_site | + | 25034 | 25034 | -537  | 9605 | AN1539 |
| 2111 | CONTIG25 | 30018 | 30282 | 0.87 | 1.08E-01 | transcription_start_site | - | 27993 | 27993 | -2157 | 9606 | AN1540 |
| 2111 | CONTIG25 | 30018 | 30282 | 0.87 | 1.08E-01 | transcription_start_site | - | 27910 | 27910 | -2240 | 9607 | AN1540 |
| 2111 | CONTIG25 | 30018 | 30282 | 0.87 | 1.08E-01 | transcription_start_site | - | 27787 | 27787 | -2363 | 9608 | AN1540 |
| 2111 | CONTIG25 | 30018 | 30282 | 0.87 | 1.08E-01 | transcription_start_site | + | 30562 | 30562 | -412  | 9609 | AN1541 |
| 2111 | CONTIG25 | 30018 | 30282 | 0.87 | 1.08E-01 | transcription_start_site | + | 31068 | 31068 | -918  | 9610 | AN1541 |
| 2111 | CONTIG25 | 30018 | 30282 | 0.87 | 1.08E-01 | transcription_start_site | + | 31512 | 31512 | -1362 | 9611 | AN1541 |
| 2111 | CONTIG25 | 30018 | 30282 | 0.87 | 1.08E-01 | transcription_start_site | + | 32051 | 32051 | -1901 | 9612 | AN1541 |
| 2111 | CONTIG25 | 30018 | 30282 | 0.87 | 1.08E-01 | transcription_start_site | + | 34012 | 34012 | -3862 | 9613 | AN1542 |
| 2208 | CONTIG25 | 35180 | 37875 | 0.78 | 0.00E+00 | transcription_start_site | + | 38115 | 38115 | -1587 | 9614 | AN1543 |
| 2208 | CONTIG25 | 35180 | 37875 | 0.78 | 0.00E+00 | transcription_start_site | + | 38218 | 38218 | -1690 | 9615 | AN1543 |
| 2208 | CONTIG25 | 35180 | 37875 | 0.78 | 0.00E+00 | transcription_start_site | + | 38401 | 38401 | -1873 | 9616 | AN1543 |
| 2208 | CONTIG25 | 35180 | 37875 | 0.78 | 0.00E+00 | transcription_start_site | + | 38696 | 38696 | -2168 | 9617 | AN1543 |
| 2208 | CONTIG25 | 35180 | 37875 | 0.78 | 0.00E+00 | transcription_start_site | + | 40194 | 40194 | -3666 | 9618 | AN1543 |
| 1729 | CONTIG25 | 41930 | 42364 | 1.11 | 2.07E-02 | transcription_start_site | - | 41714 | 41714 | -433  | 9619 | AN1544 |
| 1829 | CONTIG25 | 45380 | 45744 | 1.05 | 5.36E-02 | transcription_start_site | - | 41714 | 41714 | -3848 | 9619 | AN1544 |
| 1729 | CONTIG25 | 41930 | 42364 | 1.11 | 2.07E-02 | transcription_start_site | + | 42956 | 42956 | -809  | 9620 | AN1545 |
| 1729 | CONTIG25 | 41930 | 42364 | 1.11 | 2.07E-02 | transcription_start_site | + | 43170 | 43170 | -1023 | 9621 | AN1545 |
| 1729 | CONTIG25 | 41930 | 42364 | 1.11 | 2.07E-02 | transcription_start_site | + | 43276 | 43276 | -1129 | 9622 | AN1545 |
| 1729 | CONTIG25 | 41930 | 42364 | 1.11 | 2.07E-02 | transcription_start_site | + | 43433 | 43433 | -1286 | 9623 | AN1545 |
| 1729 | CONTIG25 | 41930 | 42364 | 1.11 | 2.07E-02 | transcription_start_site | + | 44148 | 44148 | -2001 | 9624 | AN1545 |
| 1729 | CONTIG25 | 41930 | 42364 | 1.11 | 2.07E-02 | transcription_start_site | + | 44773 | 44773 | -2626 | 9625 | AN1545 |
| 1829 | CONTIG25 | 45380 | 45744 | 1.05 | 5.36E-02 | transcription_start_site | + | 44773 | 44773 | 789   | 9625 | AN1545 |
| 1729 | CONTIG25 | 41930 | 42364 | 1.11 | 2.07E-02 | transcription_start_site | + | 46007 | 46007 | -3860 | 9626 | AN1546 |
| 1729 | CONTIG25 | 41930 | 42364 | 1.11 | 2.07E-02 | transcription_start_site | + | 46178 | 46178 | -4031 | 9627 | AN1546 |
| 1729 | CONTIG25 | 41930 | 42364 | 1.11 | 2.07E-02 | transcription_start_site | + | 46322 | 46322 | -4175 | 9628 | AN1546 |
| 1729 | CONTIG25 | 41930 | 42364 | 1.11 | 2.07E-02 | transcription_start_site | + | 47026 | 47026 | -4879 | 9629 | AN1546 |
| 1729 | CONTIG25 | 41930 | 42364 | 1.11 | 2.07E-02 | transcription_start_site | + | 47192 | 47192 | -5045 | 9630 | AN1546 |
| 1829 | CONTIG25 | 45380 | 45744 | 1.05 | 5.36E-02 | transcription_start_site | + | 46007 | 46007 | -445  | 9626 | AN1546 |
| 1829 | CONTIG25 | 45380 | 45744 | 1.05 | 5.36E-02 | transcription_start_site | + | 46178 | 46178 | -616  | 9627 | AN1546 |
| 1829 | CONTIG25 | 45380 | 45744 | 1.05 | 5.36E-02 | transcription_start_site | + | 46322 | 46322 | -760  | 9628 | AN1546 |
| 1829 | CONTIG25 | 45380 | 45744 | 1.05 | 5.36E-02 | transcription_start_site | + | 47026 | 47026 | -1464 | 9629 | AN1546 |
| 1829 | CONTIG25 | 45380 | 45744 | 1.05 | 5.36E-02 | transcription_start_site | + | 47192 | 47192 | -1630 | 9630 | AN1546 |
| 1829 | CONTIG25 | 45380 | 45744 | 1.05 | 5.36E-02 | transcription_start_site | + | 47946 | 47946 | -2384 | 9631 | AN1546 |
| 1829 | CONTIG25 | 45380 | 45744 | 1.05 | 5.36E-02 | transcription_start_site | + | 48635 | 48635 | -3073 | 9632 | AN1546 |
| 1223 | CONTIG25 | 51977 | 52481 | 1.5  | 3.99E-03 | transcription_start_site | + | 52665 | 52665 | -436  | 9634 | AN1547 |
| 1223 | CONTIG25 | 51977 | 52481 | 1.5  | 3.99E-03 | transcription_start_site | + | 52858 | 52858 | -629  | 9635 | AN1547 |
| 1223 | CONTIG25 | 51977 | 52481 | 1.5  | 3.99E-03 | transcription_start_site | + | 53147 | 53147 | -918  | 9636 | AN1547 |
| 1223 | CONTIG25 | 51977 | 52481 | 1.5  | 3.99E-03 | transcription_start_site | + | 55018 | 55018 | -2789 | 9637 | AN1548 |
| 1223 | CONTIG25 | 51977 | 52481 | 1.5  | 3.99E-03 | transcription_start_site | + | 55406 | 55406 | -3177 | 9638 | AN1548 |
| 784  | CONTIG25 | 65038 | 65317 | 1.96 | 7.06E-04 | transcription_start_site | - | 61347 | 61347 | -3830 | 9642 | AN1550 |
| 784  | CONTIG25 | 65038 | 65317 | 1.96 | 7.06E-04 | transcription_start_site | - | 61133 | 61133 | -4044 | 9643 | AN1550 |
| 784  | CONTIG25 | 65038 | 65317 | 1.96 | 7.06E-04 | transcription_start_site | - | 64115 | 64115 | -1062 | 9645 | AN1551 |

|      |          |        |        |      |          |                          |   |        |        |       |      |        |
|------|----------|--------|--------|------|----------|--------------------------|---|--------|--------|-------|------|--------|
| 784  | CONTIG25 | 65038  | 65317  | 1.96 | 7.06E-04 | transcription_start_site | - | 63878  | 63878  | -1299 | 9646 | AN1551 |
| 784  | CONTIG25 | 65038  | 65317  | 1.96 | 7.06E-04 | transcription_start_site | + | 67610  | 67610  | -2432 | 9647 | AN1552 |
| 784  | CONTIG25 | 65038  | 65317  | 1.96 | 7.06E-04 | transcription_start_site | + | 67818  | 67818  | -2640 | 9648 | AN1552 |
| 784  | CONTIG25 | 65038  | 65317  | 1.96 | 7.06E-04 | transcription_start_site | + | 67879  | 67879  | -2701 | 9649 | AN1552 |
| 695  | CONTIG25 | 70427  | 71023  | 2.05 | 0.00E+00 | transcription_start_site | - | 70182  | 70182  | -543  | 9650 | AN1553 |
| 695  | CONTIG25 | 70427  | 71023  | 2.05 | 0.00E+00 | transcription_start_site | - | 69733  | 69733  | -992  | 9651 | AN1553 |
| 695  | CONTIG25 | 70427  | 71023  | 2.05 | 0.00E+00 | transcription_start_site | - | 71106  | 71106  | 381   | 9654 | AN1554 |
| 695  | CONTIG25 | 70427  | 71023  | 2.05 | 0.00E+00 | transcription_start_site | - | 71372  | 71372  | 647   | 9653 | AN1554 |
| 1363 | CONTIG25 | 75835  | 76419  | 1.38 | 1.37E-02 | transcription_start_site | - | 73287  | 73287  | -2840 | 9652 | AN1554 |
| 1363 | CONTIG25 | 75835  | 76419  | 1.38 | 1.37E-02 | transcription_start_site | - | 71372  | 71372  | -4755 | 9653 | AN1554 |
| 1363 | CONTIG25 | 75835  | 76419  | 1.38 | 1.37E-02 | transcription_start_site | - | 71106  | 71106  | -5021 | 9654 | AN1554 |
| 1363 | CONTIG25 | 75835  | 76419  | 1.38 | 1.37E-02 | transcription_start_site | + | 77614  | 77614  | -1487 | 9655 | AN1555 |
| 1363 | CONTIG25 | 75835  | 76419  | 1.38 | 1.37E-02 | transcription_start_site | + | 80358  | 80358  | -4231 | 9656 | AN1555 |
| 1363 | CONTIG25 | 75835  | 76419  | 1.38 | 1.37E-02 | transcription_start_site | + | 81220  | 81220  | -5093 | 9657 | AN1555 |
| 1878 | CONTIG25 | 86495  | 87054  | 1.02 | 3.02E-02 | transcription_start_site | + | 87224  | 87224  | -449  | 9658 | AN1557 |
| 1878 | CONTIG25 | 86495  | 87054  | 1.02 | 3.02E-02 | transcription_start_site | + | 87376  | 87376  | -601  | 9659 | AN1557 |
| 1878 | CONTIG25 | 86495  | 87054  | 1.02 | 3.02E-02 | transcription_start_site | + | 87972  | 87972  | -1197 | 9660 | AN1557 |
| 1878 | CONTIG25 | 86495  | 87054  | 1.02 | 3.02E-02 | transcription_start_site | + | 88034  | 88034  | -1259 | 9661 | AN1557 |
| 1878 | CONTIG25 | 86495  | 87054  | 1.02 | 3.02E-02 | transcription_start_site | + | 88801  | 88801  | -2026 | 9662 | AN1557 |
| 2142 | CONTIG25 | 85520  | 86391  | 0.84 | 7.38E-02 | transcription_start_site | + | 87224  | 87224  | -1268 | 9658 | AN1557 |
| 2142 | CONTIG25 | 85520  | 86391  | 0.84 | 7.38E-02 | transcription_start_site | + | 87376  | 87376  | -1420 | 9659 | AN1557 |
| 2142 | CONTIG25 | 85520  | 86391  | 0.84 | 7.38E-02 | transcription_start_site | + | 87972  | 87972  | -2016 | 9660 | AN1557 |
| 2142 | CONTIG25 | 85520  | 86391  | 0.84 | 7.38E-02 | transcription_start_site | + | 88034  | 88034  | -2078 | 9661 | AN1557 |
| 2142 | CONTIG25 | 85520  | 86391  | 0.84 | 7.38E-02 | transcription_start_site | + | 88801  | 88801  | -2845 | 9662 | AN1557 |
| 2264 | CONTIG25 | 84830  | 85337  | 0.72 | 1.97E-01 | transcription_start_site | + | 87224  | 87224  | -2140 | 9658 | AN1557 |
| 2264 | CONTIG25 | 84830  | 85337  | 0.72 | 1.97E-01 | transcription_start_site | + | 87376  | 87376  | -2292 | 9659 | AN1557 |
| 2264 | CONTIG25 | 84830  | 85337  | 0.72 | 1.97E-01 | transcription_start_site | + | 87972  | 87972  | -2888 | 9660 | AN1557 |
| 2264 | CONTIG25 | 84830  | 85337  | 0.72 | 1.97E-01 | transcription_start_site | + | 88034  | 88034  | -2950 | 9661 | AN1557 |
| 2264 | CONTIG25 | 84830  | 85337  | 0.72 | 1.97E-01 | transcription_start_site | + | 88801  | 88801  | -3717 | 9662 | AN1557 |
| 2211 | CONTIG25 | 94060  | 94404  | 0.78 | 1.54E-01 | transcription_start_site | - | 93986  | 93986  | -246  | 9663 | AN1558 |
| 2211 | CONTIG25 | 94060  | 94404  | 0.78 | 1.54E-01 | transcription_start_site | - | 93905  | 93905  | -327  | 9664 | AN1558 |
| 2211 | CONTIG25 | 94060  | 94404  | 0.78 | 1.54E-01 | transcription_start_site | - | 93603  | 93603  | -629  | 9665 | AN1558 |
| 2211 | CONTIG25 | 94060  | 94404  | 0.78 | 1.54E-01 | transcription_start_site | - | 93498  | 93498  | -734  | 9666 | AN1558 |
| 2211 | CONTIG25 | 94060  | 94404  | 0.78 | 1.54E-01 | transcription_start_site | - | 92965  | 92965  | -1267 | 9667 | AN1558 |
| 2211 | CONTIG25 | 94060  | 94404  | 0.78 | 1.54E-01 | transcription_start_site | - | 91220  | 91220  | -3012 | 9668 | AN1558 |
| 2211 | CONTIG25 | 94060  | 94404  | 0.78 | 1.54E-01 | transcription_start_site | - | 91084  | 91084  | -3148 | 9669 | AN1558 |
| 2211 | CONTIG25 | 94060  | 94404  | 0.78 | 1.54E-01 | transcription_start_site | - | 90790  | 90790  | -3442 | 9670 | AN1558 |
| 2211 | CONTIG25 | 94060  | 94404  | 0.78 | 1.54E-01 | transcription_start_site | - | 90219  | 90219  | -4013 | 9671 | AN1558 |
| 2211 | CONTIG25 | 94060  | 94404  | 0.78 | 1.54E-01 | transcription_start_site | + | 97362  | 97362  | -3130 | 9674 | AN1560 |
| 2211 | CONTIG25 | 94060  | 94404  | 0.78 | 1.54E-01 | transcription_start_site | + | 97719  | 97719  | -3487 | 9675 | AN1560 |
| 2211 | CONTIG25 | 94060  | 94404  | 0.78 | 1.54E-01 | transcription_start_site | + | 98226  | 98226  | -3994 | 9676 | AN1560 |
| 1602 | CONTIG25 | 106954 | 107233 | 1.2  | 3.01E-02 | transcription_start_site | - | 104568 | 104568 | -2525 | 9679 | AN1562 |
| 1602 | CONTIG25 | 106954 | 107233 | 1.2  | 3.01E-02 | transcription_start_site | + | 109276 | 109276 | -2182 | 9680 | AN1563 |
| 1602 | CONTIG25 | 106954 | 107233 | 1.2  | 3.01E-02 | transcription_start_site | + | 109498 | 109498 | -2404 | 9681 | AN1563 |
| 1602 | CONTIG25 | 106954 | 107233 | 1.2  | 3.01E-02 | transcription_start_site | + | 109637 | 109637 | -2543 | 9682 | AN1563 |
| 1602 | CONTIG25 | 106954 | 107233 | 1.2  | 3.01E-02 | transcription_start_site | + | 109990 | 109990 | -2896 | 9683 | AN1563 |
| 1649 | CONTIG25 | 140334 | 140829 | 1.17 | 1.61E-02 | transcription_start_site | - | 139632 | 139632 | -949  | 9707 | AN1573 |
| 1649 | CONTIG25 | 140334 | 140829 | 1.17 | 1.61E-02 | transcription_start_site | - | 139382 | 139382 | -1199 | 9708 | AN1573 |
| 1649 | CONTIG25 | 140334 | 140829 | 1.17 | 1.61E-02 | transcription_start_site | - | 138995 | 138995 | -1586 | 9709 | AN1573 |
| 2182 | CONTIG25 | 139729 | 140303 | 0.81 | 1.38E-01 | transcription_start_site | - | 139632 | 139632 | -384  | 9707 | AN1573 |
| 2182 | CONTIG25 | 139729 | 140303 | 0.81 | 1.38E-01 | transcription_start_site | - | 139382 | 139382 | -634  | 9708 | AN1573 |
| 2182 | CONTIG25 | 139729 | 140303 | 0.81 | 1.38E-01 | transcription_start_site | - | 138995 | 138995 | -1021 | 9709 | AN1573 |
| 2239 | CONTIG25 | 140944 | 142178 | 0.75 | 2.43E-02 | transcription_start_site | - | 139632 | 139632 | -1929 | 9707 | AN1573 |
| 2239 | CONTIG25 | 140944 | 142178 | 0.75 | 2.43E-02 | transcription_start_site | - | 139382 | 139382 | -2179 | 9708 | AN1573 |
| 2239 | CONTIG25 | 140944 | 142178 | 0.75 | 2.43E-02 | transcription_start_site | - | 138995 | 138995 | -2566 | 9709 | AN1573 |
| 1649 | CONTIG25 | 140334 | 140829 | 1.17 | 1.61E-02 | transcription_start_site | - | 141375 | 141375 | 793   | 9711 | AN1574 |
| 2239 | CONTIG25 | 140944 | 142178 | 0.75 | 2.43E-02 | transcription_start_site | - | 141375 | 141375 | -186  | 9711 | AN1574 |

|      |          |        |        |      |          |                          |   |        |        |       |      |        |
|------|----------|--------|--------|------|----------|--------------------------|---|--------|--------|-------|------|--------|
| 2239 | CONTIG25 | 140944 | 142178 | 0.75 | 2.43E-02 | transcription_start_site | - | 141850 | 141850 | 289   | 9710 | AN1574 |
| 2239 | CONTIG25 | 140944 | 142178 | 0.75 | 2.43E-02 | transcription_start_site | - | 143092 | 143092 | 1531  | 9721 | AN1575 |
| 300  | CONTIG25 | 159984 | 160403 | 2.62 | 0.00E+00 | transcription_start_site | - | 160034 | 160034 | -159  | 9732 | AN1578 |
| 300  | CONTIG25 | 159984 | 160403 | 2.62 | 0.00E+00 | transcription_start_site | - | 159821 | 159821 | -372  | 9733 | AN1578 |
| 300  | CONTIG25 | 159984 | 160403 | 2.62 | 0.00E+00 | transcription_start_site | + | 162086 | 162086 | -1892 | 9734 | AN1579 |
| 300  | CONTIG25 | 159984 | 160403 | 2.62 | 0.00E+00 | transcription_start_site | + | 162343 | 162343 | -2149 | 9735 | AN1579 |
| 300  | CONTIG25 | 159984 | 160403 | 2.62 | 0.00E+00 | transcription_start_site | + | 162603 | 162603 | -2409 | 9736 | AN1579 |
| 300  | CONTIG25 | 159984 | 160403 | 2.62 | 0.00E+00 | transcription_start_site | + | 162817 | 162817 | -2623 | 9737 | AN1579 |
| 300  | CONTIG25 | 159984 | 160403 | 2.62 | 0.00E+00 | transcription_start_site | + | 163057 | 163057 | -2863 | 9738 | AN1579 |
| 300  | CONTIG25 | 159984 | 160403 | 2.62 | 0.00E+00 | transcription_start_site | + | 163245 | 163245 | -3051 | 9739 | AN1579 |
| 860  | CONTIG25 | 188196 | 188465 | 1.87 | 1.45E-03 | transcription_start_site | - | 187620 | 187620 | -710  | 9755 | AN1587 |
| 860  | CONTIG25 | 188196 | 188465 | 1.87 | 1.45E-03 | transcription_start_site | - | 186552 | 186552 | -1778 | 9756 | AN1587 |
| 860  | CONTIG25 | 188196 | 188465 | 1.87 | 1.45E-03 | transcription_start_site | + | 188056 | 188056 | 274   | 9757 | AN1588 |
| 860  | CONTIG25 | 188196 | 188465 | 1.87 | 1.45E-03 | transcription_start_site | + | 188644 | 188644 | -313  | 9758 | AN1588 |
| 860  | CONTIG25 | 188196 | 188465 | 1.87 | 1.45E-03 | transcription_start_site | + | 189065 | 189065 | -734  | 9759 | AN1588 |
| 860  | CONTIG25 | 188196 | 188465 | 1.87 | 1.45E-03 | transcription_start_site | + | 189166 | 189166 | -835  | 9760 | AN1588 |
| 860  | CONTIG25 | 188196 | 188465 | 1.87 | 1.45E-03 | transcription_start_site | + | 189282 | 189282 | -951  | 9761 | AN1588 |
| 860  | CONTIG25 | 188196 | 188465 | 1.87 | 1.45E-03 | transcription_start_site | + | 189650 | 189650 | -1319 | 9762 | AN1588 |
| 860  | CONTIG25 | 188196 | 188465 | 1.87 | 1.45E-03 | transcription_start_site | + | 189797 | 189797 | -1466 | 9763 | AN1588 |
| 860  | CONTIG25 | 188196 | 188465 | 1.87 | 1.45E-03 | transcription_start_site | + | 189945 | 189945 | -1614 | 9764 | AN1588 |
| 860  | CONTIG25 | 188196 | 188465 | 1.87 | 1.45E-03 | transcription_start_site | + | 190211 | 190211 | -1880 | 9765 | AN1588 |
| 860  | CONTIG25 | 188196 | 188465 | 1.87 | 1.45E-03 | transcription_start_site | + | 190442 | 190442 | -2111 | 9766 | AN1588 |
| 146  | CONTIG26 | 6621   | 6955   | 2.97 | 2.69E-04 | transcription_start_site | - | 3799   | 3799   | -2989 | 9811 | AN1602 |
| 668  | CONTIG26 | 5706   | 6358   | 2.08 | 3.78E-03 | transcription_start_site | - | 3799   | 3799   | -2233 | 9811 | AN1602 |
| 146  | CONTIG26 | 6621   | 6955   | 2.97 | 2.69E-04 | transcription_start_site | + | 6344   | 6344   | 444   | 9813 | AN1603 |
| 146  | CONTIG26 | 6621   | 6955   | 2.97 | 2.69E-04 | transcription_start_site | + | 5965   | 5965   | 823   | 9812 | AN1603 |
| 668  | CONTIG26 | 5706   | 6358   | 2.08 | 3.78E-03 | transcription_start_site | + | 5965   | 5965   | 67    | 9812 | AN1603 |
| 668  | CONTIG26 | 5706   | 6358   | 2.08 | 3.78E-03 | transcription_start_site | + | 6344   | 6344   | -312  | 9813 | AN1603 |
| 146  | CONTIG26 | 6621   | 6955   | 2.97 | 2.69E-04 | transcription_start_site | + | 8263   | 8263   | -1475 | 9814 | AN1604 |
| 146  | CONTIG26 | 6621   | 6955   | 2.97 | 2.69E-04 | transcription_start_site | + | 8413   | 8413   | -1625 | 9815 | AN1604 |
| 668  | CONTIG26 | 5706   | 6358   | 2.08 | 3.78E-03 | transcription_start_site | + | 8263   | 8263   | -2231 | 9814 | AN1604 |
| 668  | CONTIG26 | 5706   | 6358   | 2.08 | 3.78E-03 | transcription_start_site | + | 8413   | 8413   | -2381 | 9815 | AN1604 |
| 67   | CONTIG26 | 9696   | 10195  | 3.18 | 0.00E+00 | transcription_start_site | + | 10567  | 10567  | -621  | 9816 | AN1605 |
| 146  | CONTIG26 | 6621   | 6955   | 2.97 | 2.69E-04 | transcription_start_site | + | 10567  | 10567  | -3779 | 9816 | AN1605 |
| 668  | CONTIG26 | 5706   | 6358   | 2.08 | 3.78E-03 | transcription_start_site | + | 10567  | 10567  | -4535 | 9816 | AN1605 |
| 2029 | CONTIG26 | 10896  | 11784  | 0.93 | 1.81E-01 | transcription_start_site | + | 10567  | 10567  | 773   | 9816 | AN1605 |
| 1887 | CONTIG26 | 23404  | 23842  | 1.02 | 1.97E-01 | transcription_start_site | - | 19530  | 19530  | -4093 | 9818 | AN1607 |
| 1887 | CONTIG26 | 23404  | 23842  | 1.02 | 1.97E-01 | transcription_start_site | - | 18582  | 18582  | -5041 | 9819 | AN1607 |
| 1887 | CONTIG26 | 23404  | 23842  | 1.02 | 1.97E-01 | transcription_start_site | + | 23830  | 23830  | -207  | 9827 | AN1608 |
| 1887 | CONTIG26 | 23404  | 23842  | 1.02 | 1.97E-01 | transcription_start_site | + | 24080  | 24080  | -457  | 9828 | AN1608 |
| 1887 | CONTIG26 | 23404  | 23842  | 1.02 | 1.97E-01 | transcription_start_site | + | 24833  | 24833  | -1210 | 9829 | AN1609 |
| 1887 | CONTIG26 | 23404  | 23842  | 1.02 | 1.97E-01 | transcription_start_site | + | 25493  | 25493  | -1870 | 9830 | AN1609 |
| 1887 | CONTIG26 | 23404  | 23842  | 1.02 | 1.97E-01 | transcription_start_site | + | 25662  | 25662  | -2039 | 9831 | AN1609 |
| 1887 | CONTIG26 | 23404  | 23842  | 1.02 | 1.97E-01 | transcription_start_site | + | 26165  | 26165  | -2542 | 9832 | AN1609 |
| 1887 | CONTIG26 | 23404  | 23842  | 1.02 | 1.97E-01 | transcription_start_site | + | 26645  | 26645  | -3022 | 9833 | AN1609 |
| 1887 | CONTIG26 | 23404  | 23842  | 1.02 | 1.97E-01 | transcription_start_site | + | 27142  | 27142  | -3519 | 9834 | AN1609 |
| 1887 | CONTIG26 | 23404  | 23842  | 1.02 | 1.97E-01 | transcription_start_site | + | 27412  | 27412  | -3789 | 9835 | AN1609 |
| 519  | CONTIG26 | 41717  | 42211  | 2.29 | 5.08E-03 | transcription_start_site | - | 39177  | 39177  | -2787 | 9843 | AN1613 |
| 519  | CONTIG26 | 41717  | 42211  | 2.29 | 5.08E-03 | transcription_start_site | - | 38827  | 38827  | -3137 | 9844 | AN1613 |
| 519  | CONTIG26 | 41717  | 42211  | 2.29 | 5.08E-03 | transcription_start_site | - | 38598  | 38598  | -3366 | 9845 | AN1613 |
| 519  | CONTIG26 | 41717  | 42211  | 2.29 | 5.08E-03 | transcription_start_site | - | 38199  | 38199  | -3765 | 9846 | AN1613 |
| 519  | CONTIG26 | 41717  | 42211  | 2.29 | 5.08E-03 | transcription_start_site | - | 37947  | 37947  | -4017 | 9847 | AN1613 |
| 979  | CONTIG26 | 42907  | 43331  | 1.74 | 1.30E-02 | transcription_start_site | - | 39177  | 39177  | -3942 | 9843 | AN1613 |
| 979  | CONTIG26 | 42907  | 43331  | 1.74 | 1.30E-02 | transcription_start_site | - | 38827  | 38827  | -4292 | 9844 | AN1613 |
| 979  | CONTIG26 | 42907  | 43331  | 1.74 | 1.30E-02 | transcription_start_site | - | 38598  | 38598  | -4521 | 9845 | AN1613 |
| 979  | CONTIG26 | 42907  | 43331  | 1.74 | 1.30E-02 | transcription_start_site | - | 38199  | 38199  | -4920 | 9846 | AN1613 |
| 979  | CONTIG26 | 42907  | 43331  | 1.74 | 1.30E-02 | transcription_start_site | - | 37947  | 37947  | -5172 | 9847 | AN1613 |



|      |          |        |        |      |          |                          |   |        |        |       |      |        |
|------|----------|--------|--------|------|----------|--------------------------|---|--------|--------|-------|------|--------|
| 1195 | CONTIG26 | 42237  | 42881  | 1.53 | 4.78E-02 | transcription_start_site | - | 39177  | 39177  | -3382 | 9843 | AN1613 |
| 1195 | CONTIG26 | 42237  | 42881  | 1.53 | 4.78E-02 | transcription_start_site | - | 38827  | 38827  | -3732 | 9844 | AN1613 |
| 1195 | CONTIG26 | 42237  | 42881  | 1.53 | 4.78E-02 | transcription_start_site | - | 38598  | 38598  | -3961 | 9845 | AN1613 |
| 1195 | CONTIG26 | 42237  | 42881  | 1.53 | 4.78E-02 | transcription_start_site | - | 38199  | 38199  | -4360 | 9846 | AN1613 |
| 1195 | CONTIG26 | 42237  | 42881  | 1.53 | 4.78E-02 | transcription_start_site | - | 37947  | 37947  | -4612 | 9847 | AN1613 |
| 519  | CONTIG26 | 41717  | 42211  | 2.29 | 5.08E-03 | transcription_start_site | - | 41280  | 41280  | -684  | 9848 | AN1614 |
| 979  | CONTIG26 | 42907  | 43331  | 1.74 | 1.30E-02 | transcription_start_site | - | 41280  | 41280  | -1839 | 9848 | AN1614 |
| 1195 | CONTIG26 | 42237  | 42881  | 1.53 | 4.78E-02 | transcription_start_site | - | 41280  | 41280  | -1279 | 9848 | AN1614 |
| 940  | CONTIG26 | 49963  | 50470  | 1.78 | 2.29E-02 | transcription_start_site | - | 47555  | 47555  | -2661 | 9849 | AN1615 |
| 940  | CONTIG26 | 49963  | 50470  | 1.78 | 2.29E-02 | transcription_start_site | - | 46207  | 46207  | -4009 | 9850 | AN1615 |
| 940  | CONTIG26 | 49963  | 50470  | 1.78 | 2.29E-02 | transcription_start_site | - | 46071  | 46071  | -4145 | 9851 | AN1615 |
| 940  | CONTIG26 | 49963  | 50470  | 1.78 | 2.29E-02 | transcription_start_site | - | 45709  | 45709  | -4507 | 9852 | AN1615 |
| 940  | CONTIG26 | 49963  | 50470  | 1.78 | 2.29E-02 | transcription_start_site | - | 45267  | 45267  | -4949 | 9853 | AN1615 |
| 940  | CONTIG26 | 49963  | 50470  | 1.78 | 2.29E-02 | transcription_start_site | - | 44983  | 44983  | -5233 | 9854 | AN1615 |
| 940  | CONTIG26 | 49963  | 50470  | 1.78 | 2.29E-02 | transcription_start_site | + | 50497  | 50497  | -280  | 9857 | AN1616 |
| 940  | CONTIG26 | 49963  | 50470  | 1.78 | 2.29E-02 | transcription_start_site | + | 50699  | 50699  | -482  | 9858 | AN1616 |
| 940  | CONTIG26 | 49963  | 50470  | 1.78 | 2.29E-02 | transcription_start_site | + | 50842  | 50842  | -625  | 9859 | AN1616 |
| 940  | CONTIG26 | 49963  | 50470  | 1.78 | 2.29E-02 | transcription_start_site | + | 50988  | 50988  | -771  | 9860 | AN1616 |
| 940  | CONTIG26 | 49963  | 50470  | 1.78 | 2.29E-02 | transcription_start_site | + | 52744  | 52744  | -2527 | 9861 | AN1617 |
| 940  | CONTIG26 | 49963  | 50470  | 1.78 | 2.29E-02 | transcription_start_site | + | 53159  | 53159  | -2942 | 9862 | AN1617 |
| 551  | CONTIG26 | 73817  | 74316  | 2.25 | 6.24E-03 | transcription_start_site | - | 69123  | 69123  | -4943 | 9875 | AN1623 |
| 52   | CONTIG26 | 75757  | 76703  | 3.23 | 0.00E+00 | transcription_start_site | - | 75486  | 75486  | -744  | 9880 | AN1624 |
| 816  | CONTIG26 | 79954  | 80393  | 1.91 | 7.02E-03 | transcription_start_site | - | 75486  | 75486  | -4687 | 9880 | AN1624 |
| 52   | CONTIG26 | 75757  | 76703  | 3.23 | 0.00E+00 | transcription_start_site | + | 80324  | 80324  | -4094 | 9881 | AN1625 |
| 52   | CONTIG26 | 75757  | 76703  | 3.23 | 0.00E+00 | transcription_start_site | + | 80709  | 80709  | -4479 | 9882 | AN1625 |
| 52   | CONTIG26 | 75757  | 76703  | 3.23 | 0.00E+00 | transcription_start_site | + | 80947  | 80947  | -4717 | 9883 | AN1625 |
| 52   | CONTIG26 | 75757  | 76703  | 3.23 | 0.00E+00 | transcription_start_site | + | 81548  | 81548  | -5318 | 9884 | AN1625 |
| 816  | CONTIG26 | 79954  | 80393  | 1.91 | 7.02E-03 | transcription_start_site | + | 80324  | 80324  | -150  | 9881 | AN1625 |
| 816  | CONTIG26 | 79954  | 80393  | 1.91 | 7.02E-03 | transcription_start_site | + | 80709  | 80709  | -535  | 9882 | AN1625 |
| 816  | CONTIG26 | 79954  | 80393  | 1.91 | 7.02E-03 | transcription_start_site | + | 80947  | 80947  | -773  | 9883 | AN1625 |
| 816  | CONTIG26 | 79954  | 80393  | 1.91 | 7.02E-03 | transcription_start_site | + | 81548  | 81548  | -1374 | 9884 | AN1625 |
| 816  | CONTIG26 | 79954  | 80393  | 1.91 | 7.02E-03 | transcription_start_site | + | 81827  | 81827  | -1653 | 9885 | AN1625 |
| 191  | CONTIG26 | 94589  | 94928  | 2.84 | 2.06E-04 | transcription_start_site | - | 94223  | 94223  | -535  | 9892 | AN1628 |
| 191  | CONTIG26 | 94589  | 94928  | 2.84 | 2.06E-04 | transcription_start_site | - | 93896  | 93896  | -862  | 9893 | AN1628 |
| 191  | CONTIG26 | 94589  | 94928  | 2.84 | 2.06E-04 | transcription_start_site | - | 93580  | 93580  | -1178 | 9894 | AN1628 |
| 191  | CONTIG26 | 94589  | 94928  | 2.84 | 2.06E-04 | transcription_start_site | - | 95733  | 95733  | 974   | 9899 | AN1629 |
| 616  | CONTIG26 | 99695  | 100044 | 2.17 | 7.70E-03 | transcription_start_site | - | 97350  | 97350  | -2519 | 9895 | AN1629 |
| 616  | CONTIG26 | 99695  | 100044 | 2.17 | 7.70E-03 | transcription_start_site | - | 97174  | 97174  | -2695 | 9896 | AN1629 |
| 616  | CONTIG26 | 99695  | 100044 | 2.17 | 7.70E-03 | transcription_start_site | - | 97094  | 97094  | -2775 | 9897 | AN1629 |
| 616  | CONTIG26 | 99695  | 100044 | 2.17 | 7.70E-03 | transcription_start_site | - | 96923  | 96923  | -2946 | 9898 | AN1629 |
| 616  | CONTIG26 | 99695  | 100044 | 2.17 | 7.70E-03 | transcription_start_site | - | 95733  | 95733  | -4136 | 9899 | AN1629 |
| 1392 | CONTIG26 | 106145 | 106714 | 1.36 | 4.21E-02 | transcription_start_site | - | 105852 | 105852 | -577  | 9900 | AN1631 |
| 1392 | CONTIG26 | 106145 | 106714 | 1.36 | 4.21E-02 | transcription_start_site | - | 105700 | 105700 | -729  | 9901 | AN1631 |
| 1392 | CONTIG26 | 106145 | 106714 | 1.36 | 4.21E-02 | transcription_start_site | - | 105415 | 105415 | -1014 | 9902 | AN1631 |
| 1392 | CONTIG26 | 106145 | 106714 | 1.36 | 4.21E-02 | transcription_start_site | - | 104916 | 104916 | -1513 | 9903 | AN1631 |
| 1392 | CONTIG26 | 106145 | 106714 | 1.36 | 4.21E-02 | transcription_start_site | - | 104436 | 104436 | -1993 | 9904 | AN1631 |
| 1684 | CONTIG26 | 110415 | 110834 | 1.15 | 1.38E-01 | transcription_start_site | - | 105852 | 105852 | -4772 | 9900 | AN1631 |
| 1684 | CONTIG26 | 110415 | 110834 | 1.15 | 1.38E-01 | transcription_start_site | - | 105700 | 105700 | -4924 | 9901 | AN1631 |
| 1684 | CONTIG26 | 110415 | 110834 | 1.15 | 1.38E-01 | transcription_start_site | - | 105415 | 105415 | -5209 | 9902 | AN1631 |
| 1392 | CONTIG26 | 106145 | 106714 | 1.36 | 4.21E-02 | transcription_start_site | - | 106963 | 106963 | 533   | 9907 | AN1632 |
| 1684 | CONTIG26 | 110415 | 110834 | 1.15 | 1.38E-01 | transcription_start_site | - | 109760 | 109760 | -864  | 9905 | AN1632 |
| 1684 | CONTIG26 | 110415 | 110834 | 1.15 | 1.38E-01 | transcription_start_site | - | 109533 | 109533 | -1091 | 9906 | AN1632 |
| 1684 | CONTIG26 | 110415 | 110834 | 1.15 | 1.38E-01 | transcription_start_site | - | 106963 | 106963 | -3661 | 9907 | AN1632 |
| 642  | CONTIG26 | 122642 | 123053 | 2.12 | 9.32E-03 | transcription_start_site | - | 118634 | 118634 | -4213 | 9913 | AN1635 |
| 642  | CONTIG26 | 122642 | 123053 | 2.12 | 9.32E-03 | transcription_start_site | - | 118510 | 118510 | -4337 | 9914 | AN1635 |
| 642  | CONTIG26 | 122642 | 123053 | 2.12 | 9.32E-03 | transcription_start_site | - | 118227 | 118227 | -4620 | 9915 | AN1635 |
| 642  | CONTIG26 | 122642 | 123053 | 2.12 | 9.32E-03 | transcription_start_site | - | 122633 | 122633 | -214  | 9919 | AN1637 |

|      |          |        |        |      |          |                          |   |        |        |       |       |        |
|------|----------|--------|--------|------|----------|--------------------------|---|--------|--------|-------|-------|--------|
| 642  | CONTIG26 | 122642 | 123053 | 2.12 | 9.32E-03 | transcription_start_site | - | 122476 | 122476 | -371  | 9920  | AN1637 |
| 642  | CONTIG26 | 122642 | 123053 | 2.12 | 9.32E-03 | transcription_start_site | - | 123401 | 123401 | 553   | 9923  | AN1638 |
| 642  | CONTIG26 | 122642 | 123053 | 2.12 | 9.32E-03 | transcription_start_site | + | 126949 | 126949 | -4101 | 9924  | AN1639 |
| 642  | CONTIG26 | 122642 | 123053 | 2.12 | 9.32E-03 | transcription_start_site | + | 127142 | 127142 | -4294 | 9925  | AN1639 |
| 642  | CONTIG26 | 122642 | 123053 | 2.12 | 9.32E-03 | transcription_start_site | + | 127348 | 127348 | -4500 | 9926  | AN1639 |
| 482  | CONTIG26 | 173641 | 174200 | 2.34 | 4.57E-03 | transcription_start_site | - | 169131 | 169131 | -4789 | 9977  | AN1651 |
| 482  | CONTIG26 | 173641 | 174200 | 2.34 | 4.57E-03 | transcription_start_site | - | 168876 | 168876 | -5044 | 9978  | AN1651 |
| 582  | CONTIG26 | 181361 | 181775 | 2.21 | 3.17E-03 | transcription_start_site | + | 182997 | 182997 | -1429 | 9982  | AN1652 |
| 582  | CONTIG26 | 181361 | 181775 | 2.21 | 3.17E-03 | transcription_start_site | + | 183623 | 183623 | -2055 | 9983  | AN1652 |
| 582  | CONTIG26 | 181361 | 181775 | 2.21 | 3.17E-03 | transcription_start_site | + | 185838 | 185838 | -4270 | 9984  | AN1653 |
| 299  | CONTIG26 | 211594 | 212378 | 2.63 | 1.45E-03 | transcription_start_site | - | 211203 | 211203 | -783  | 9992  | AN1658 |
| 586  | CONTIG26 | 214444 | 214858 | 2.21 | 7.08E-03 | transcription_start_site | - | 211203 | 211203 | -3448 | 9992  | AN1658 |
| 1619 | CONTIG26 | 210604 | 211261 | 1.19 | 7.38E-02 | transcription_start_site | - | 211203 | 211203 | 270   | 9992  | AN1658 |
| 1674 | CONTIG26 | 212709 | 213958 | 1.15 | 4.39E-02 | transcription_start_site | - | 211203 | 211203 | -2130 | 9992  | AN1658 |
| 299  | CONTIG26 | 211594 | 212378 | 2.63 | 1.45E-03 | transcription_start_site | + | 212808 | 212808 | -822  | 9993  | AN1659 |
| 299  | CONTIG26 | 211594 | 212378 | 2.63 | 1.45E-03 | transcription_start_site | + | 212873 | 212873 | -887  | 9994  | AN1659 |
| 299  | CONTIG26 | 211594 | 212378 | 2.63 | 1.45E-03 | transcription_start_site | + | 213500 | 213500 | -1514 | 9995  | AN1659 |
| 299  | CONTIG26 | 211594 | 212378 | 2.63 | 1.45E-03 | transcription_start_site | + | 214105 | 214105 | -2119 | 9996  | AN1659 |
| 586  | CONTIG26 | 214444 | 214858 | 2.21 | 7.08E-03 | transcription_start_site | + | 214105 | 214105 | 546   | 9996  | AN1659 |
| 586  | CONTIG26 | 214444 | 214858 | 2.21 | 7.08E-03 | transcription_start_site | + | 213500 | 213500 | 1151  | 9995  | AN1659 |
| 1619 | CONTIG26 | 210604 | 211261 | 1.19 | 7.38E-02 | transcription_start_site | + | 212808 | 212808 | -1875 | 9993  | AN1659 |
| 1619 | CONTIG26 | 210604 | 211261 | 1.19 | 7.38E-02 | transcription_start_site | + | 212873 | 212873 | -1940 | 9994  | AN1659 |
| 1619 | CONTIG26 | 210604 | 211261 | 1.19 | 7.38E-02 | transcription_start_site | + | 213500 | 213500 | -2567 | 9995  | AN1659 |
| 1619 | CONTIG26 | 210604 | 211261 | 1.19 | 7.38E-02 | transcription_start_site | + | 214105 | 214105 | -3172 | 9996  | AN1659 |
| 1674 | CONTIG26 | 212709 | 213958 | 1.15 | 4.39E-02 | transcription_start_site | + | 213500 | 213500 | -166  | 9995  | AN1659 |
| 1674 | CONTIG26 | 212709 | 213958 | 1.15 | 4.39E-02 | transcription_start_site | + | 212873 | 212873 | 460   | 9994  | AN1659 |
| 1674 | CONTIG26 | 212709 | 213958 | 1.15 | 4.39E-02 | transcription_start_site | + | 212808 | 212808 | 525   | 9993  | AN1659 |
| 1674 | CONTIG26 | 212709 | 213958 | 1.15 | 4.39E-02 | transcription_start_site | + | 214105 | 214105 | -771  | 9996  | AN1659 |
| 1888 | CONTIG26 | 246083 | 246367 | 1.02 | 1.97E-01 | transcription_start_site | - | 242485 | 242485 | -3740 | 10024 | AN1668 |
| 1888 | CONTIG26 | 246083 | 246367 | 1.02 | 1.97E-01 | transcription_start_site | + | 247139 | 247139 | -914  | 10026 | AN1670 |
| 1888 | CONTIG26 | 246083 | 246367 | 1.02 | 1.97E-01 | transcription_start_site | + | 247449 | 247449 | -1224 | 10027 | AN1670 |
| 1888 | CONTIG26 | 246083 | 246367 | 1.02 | 1.97E-01 | transcription_start_site | + | 249197 | 249197 | -2972 | 10028 | AN1670 |
| 1888 | CONTIG26 | 246083 | 246367 | 1.02 | 1.97E-01 | transcription_start_site | + | 249969 | 249969 | -3744 | 10029 | AN1671 |
| 1888 | CONTIG26 | 246083 | 246367 | 1.02 | 1.97E-01 | transcription_start_site | + | 250091 | 250091 | -3866 | 10030 | AN1671 |
| 1888 | CONTIG26 | 246083 | 246367 | 1.02 | 1.97E-01 | transcription_start_site | + | 250167 | 250167 | -3942 | 10031 | AN1671 |
| 1888 | CONTIG26 | 246083 | 246367 | 1.02 | 1.97E-01 | transcription_start_site | + | 250711 | 250711 | -4486 | 10032 | AN1671 |
| 1888 | CONTIG26 | 246083 | 246367 | 1.02 | 1.97E-01 | transcription_start_site | + | 250776 | 250776 | -4551 | 10033 | AN1671 |
| 275  | CONTIG26 | 263267 | 263841 | 2.67 | 1.09E-03 | transcription_start_site | - | 260467 | 260467 | -3087 | 10045 | AN1674 |
| 1620 | CONTIG26 | 265052 | 265481 | 1.19 | 7.38E-02 | transcription_start_site | - | 260467 | 260467 | -4799 | 10045 | AN1674 |
| 275  | CONTIG26 | 263267 | 263841 | 2.67 | 1.09E-03 | transcription_start_site | - | 263025 | 263025 | -529  | 10047 | AN1675 |
| 275  | CONTIG26 | 263267 | 263841 | 2.67 | 1.09E-03 | transcription_start_site | - | 262920 | 262920 | -634  | 10048 | AN1675 |
| 275  | CONTIG26 | 263267 | 263841 | 2.67 | 1.09E-03 | transcription_start_site | - | 262225 | 262225 | -1329 | 10049 | AN1675 |
| 643  | CONTIG26 | 267987 | 268273 | 2.12 | 9.32E-03 | transcription_start_site | - | 263025 | 263025 | -5105 | 10047 | AN1675 |
| 1620 | CONTIG26 | 265052 | 265481 | 1.19 | 7.38E-02 | transcription_start_site | - | 263025 | 263025 | -2241 | 10047 | AN1675 |
| 1620 | CONTIG26 | 265052 | 265481 | 1.19 | 7.38E-02 | transcription_start_site | - | 262920 | 262920 | -2346 | 10048 | AN1675 |
| 1620 | CONTIG26 | 265052 | 265481 | 1.19 | 7.38E-02 | transcription_start_site | - | 262225 | 262225 | -3041 | 10049 | AN1675 |
| 275  | CONTIG26 | 263267 | 263841 | 2.67 | 1.09E-03 | transcription_start_site | - | 264481 | 264481 | 927   | 10051 | AN1676 |
| 643  | CONTIG26 | 267987 | 268273 | 2.12 | 9.32E-03 | transcription_start_site | - | 264983 | 264983 | -3147 | 10050 | AN1676 |
| 643  | CONTIG26 | 267987 | 268273 | 2.12 | 9.32E-03 | transcription_start_site | - | 264481 | 264481 | -3649 | 10051 | AN1676 |
| 1620 | CONTIG26 | 265052 | 265481 | 1.19 | 7.38E-02 | transcription_start_site | - | 264983 | 264983 | -283  | 10050 | AN1676 |
| 1620 | CONTIG26 | 265052 | 265481 | 1.19 | 7.38E-02 | transcription_start_site | - | 264481 | 264481 | -785  | 10051 | AN1676 |
| 643  | CONTIG26 | 267987 | 268273 | 2.12 | 9.32E-03 | transcription_start_site | + | 269175 | 269175 | -1045 | 10052 | AN1677 |
| 643  | CONTIG26 | 267987 | 268273 | 2.12 | 9.32E-03 | transcription_start_site | + | 269444 | 269444 | -1314 | 10053 | AN1677 |
| 643  | CONTIG26 | 267987 | 268273 | 2.12 | 9.32E-03 | transcription_start_site | + | 269896 | 269896 | -1766 | 10054 | AN1677 |
| 1104 | CONTIG26 | 270827 | 271192 | 1.61 | 1.83E-02 | transcription_start_site | + | 269896 | 269896 | 1113  | 10054 | AN1677 |
| 1620 | CONTIG26 | 265052 | 265481 | 1.19 | 7.38E-02 | transcription_start_site | + | 269175 | 269175 | -3908 | 10052 | AN1677 |
| 1620 | CONTIG26 | 265052 | 265481 | 1.19 | 7.38E-02 | transcription_start_site | + | 269444 | 269444 | -4177 | 10053 | AN1677 |

|      |          |        |        |      |          |                          |   |        |        |       |       |        |
|------|----------|--------|--------|------|----------|--------------------------|---|--------|--------|-------|-------|--------|
| 1620 | CONTIG26 | 265052 | 265481 | 1.19 | 7.38E-02 | transcription_start_site | + | 269896 | 269896 | -4629 | 10054 | AN1677 |
| 643  | CONTIG26 | 267987 | 268273 | 2.12 | 9.32E-03 | transcription_start_site | + | 273254 | 273254 | -5124 | 10055 | AN1678 |
| 1104 | CONTIG26 | 270827 | 271192 | 1.61 | 1.83E-02 | transcription_start_site | + | 273254 | 273254 | -2244 | 10055 | AN1678 |
| 1104 | CONTIG26 | 270827 | 271192 | 1.61 | 1.83E-02 | transcription_start_site | + | 275515 | 275515 | -4505 | 10056 | AN1678 |
| 1104 | CONTIG26 | 270827 | 271192 | 1.61 | 1.83E-02 | transcription_start_site | + | 275926 | 275926 | -4916 | 10057 | AN1679 |
| 817  | CONTIG26 | 304596 | 304937 | 1.91 | 7.02E-03 | transcription_start_site | - | 304864 | 304864 | 97    | 10087 | AN1688 |
| 817  | CONTIG26 | 304596 | 304937 | 1.91 | 7.02E-03 | transcription_start_site | - | 304947 | 304947 | 180   | 10086 | AN1688 |
| 817  | CONTIG26 | 304596 | 304937 | 1.91 | 7.02E-03 | transcription_start_site | - | 304335 | 304335 | -431  | 10088 | AN1688 |
| 817  | CONTIG26 | 304596 | 304937 | 1.91 | 7.02E-03 | transcription_start_site | - | 303974 | 303974 | -792  | 10089 | AN1688 |
| 817  | CONTIG26 | 304596 | 304937 | 1.91 | 7.02E-03 | transcription_start_site | - | 303715 | 303715 | -1051 | 10090 | AN1688 |
| 817  | CONTIG26 | 304596 | 304937 | 1.91 | 7.02E-03 | transcription_start_site | - | 303543 | 303543 | -1223 | 10091 | AN1688 |
| 817  | CONTIG26 | 304596 | 304937 | 1.91 | 7.02E-03 | transcription_start_site | - | 303344 | 303344 | -1422 | 10092 | AN1688 |
| 1825 | CONTIG26 | 340657 | 341093 | 1.06 | 1.76E-01 | transcription_start_site | - | 338017 | 338017 | -2858 | 10120 | AN1698 |
| 1825 | CONTIG26 | 340657 | 341093 | 1.06 | 1.76E-01 | transcription_start_site | - | 337852 | 337852 | -3023 | 10121 | AN1698 |
| 1825 | CONTIG26 | 340657 | 341093 | 1.06 | 1.76E-01 | transcription_start_site | - | 337621 | 337621 | -3254 | 10122 | AN1698 |
| 1825 | CONTIG26 | 340657 | 341093 | 1.06 | 1.76E-01 | transcription_start_site | - | 337249 | 337249 | -3626 | 10123 | AN1698 |
| 1825 | CONTIG26 | 340657 | 341093 | 1.06 | 1.76E-01 | transcription_start_site | - | 336100 | 336100 | -4775 | 10124 | AN1698 |
| 1825 | CONTIG26 | 340657 | 341093 | 1.06 | 1.76E-01 | transcription_start_site | - | 340602 | 340602 | -273  | 10126 | AN1699 |
| 1825 | CONTIG26 | 340657 | 341093 | 1.06 | 1.76E-01 | transcription_start_site | - | 340422 | 340422 | -453  | 10127 | AN1699 |
| 1825 | CONTIG26 | 340657 | 341093 | 1.06 | 1.76E-01 | transcription_start_site | - | 340320 | 340320 | -555  | 10128 | AN1699 |
| 1825 | CONTIG26 | 340657 | 341093 | 1.06 | 1.76E-01 | transcription_start_site | - | 339993 | 339993 | -882  | 10129 | AN1699 |
| 1825 | CONTIG26 | 340657 | 341093 | 1.06 | 1.76E-01 | transcription_start_site | - | 341955 | 341955 | 1080  | 10134 | AN1700 |
| 1825 | CONTIG26 | 340657 | 341093 | 1.06 | 1.76E-01 | transcription_start_site | + | 345775 | 345775 | -4900 | 10135 | AN1701 |
| 1762 | CONTIG26 | 356180 | 356530 | 1.1  | 1.54E-01 | transcription_start_site | - | 353154 | 353154 | -3201 | 10147 | AN1704 |
| 1762 | CONTIG26 | 356180 | 356530 | 1.1  | 1.54E-01 | transcription_start_site | - | 353044 | 353044 | -3311 | 10148 | AN1704 |
| 1762 | CONTIG26 | 356180 | 356530 | 1.1  | 1.54E-01 | transcription_start_site | - | 355739 | 355739 | -616  | 10149 | AN1705 |
| 1762 | CONTIG26 | 356180 | 356530 | 1.1  | 1.54E-01 | transcription_start_site | - | 354358 | 354358 | -1997 | 10150 | AN1705 |
| 1762 | CONTIG26 | 356180 | 356530 | 1.1  | 1.54E-01 | transcription_start_site | - | 354134 | 354134 | -2221 | 10151 | AN1705 |
| 1762 | CONTIG26 | 356180 | 356530 | 1.1  | 1.54E-01 | transcription_start_site | - | 353921 | 353921 | -2434 | 10152 | AN1705 |
| 1762 | CONTIG26 | 356180 | 356530 | 1.1  | 1.54E-01 | transcription_start_site | + | 360685 | 360685 | -4330 | 10156 | AN1707 |
| 1762 | CONTIG26 | 356180 | 356530 | 1.1  | 1.54E-01 | transcription_start_site | + | 360890 | 360890 | -4535 | 10157 | AN1707 |
| 1762 | CONTIG26 | 356180 | 356530 | 1.1  | 1.54E-01 | transcription_start_site | + | 361315 | 361315 | -4960 | 10158 | AN1707 |
| 1299 | CONTIG26 | 375235 | 375672 | 1.44 | 3.02E-02 | transcription_start_site | + | 374275 | 374275 | 1178  | 10172 | AN1712 |
| 1299 | CONTIG26 | 375235 | 375672 | 1.44 | 3.02E-02 | transcription_start_site | + | 375762 | 375762 | -308  | 10173 | AN1713 |
| 1299 | CONTIG26 | 375235 | 375672 | 1.44 | 3.02E-02 | transcription_start_site | + | 376116 | 376116 | -662  | 10174 | AN1713 |
| 1299 | CONTIG26 | 375235 | 375672 | 1.44 | 3.02E-02 | transcription_start_site | + | 377009 | 377009 | -1555 | 10175 | AN1713 |
| 1299 | CONTIG26 | 375235 | 375672 | 1.44 | 3.02E-02 | transcription_start_site | + | 378323 | 378323 | -2869 | 10176 | AN1713 |
| 1299 | CONTIG26 | 375235 | 375672 | 1.44 | 3.02E-02 | transcription_start_site | + | 379228 | 379228 | -3774 | 10177 | AN1714 |
| 1351 | CONTIG26 | 380045 | 380398 | 1.4  | 6.74E-02 | transcription_start_site | + | 379228 | 379228 | 993   | 10177 | AN1714 |
| 1299 | CONTIG26 | 375235 | 375672 | 1.44 | 3.02E-02 | transcription_start_site | + | 380366 | 380366 | -4912 | 10178 | AN1715 |
| 1299 | CONTIG26 | 375235 | 375672 | 1.44 | 3.02E-02 | transcription_start_site | + | 380464 | 380464 | -5010 | 10179 | AN1715 |
| 1299 | CONTIG26 | 375235 | 375672 | 1.44 | 3.02E-02 | transcription_start_site | + | 380620 | 380620 | -5166 | 10180 | AN1715 |
| 1351 | CONTIG26 | 380045 | 380398 | 1.4  | 6.74E-02 | transcription_start_site | + | 380366 | 380366 | -144  | 10178 | AN1715 |
| 1351 | CONTIG26 | 380045 | 380398 | 1.4  | 6.74E-02 | transcription_start_site | + | 380464 | 380464 | -242  | 10179 | AN1715 |
| 1351 | CONTIG26 | 380045 | 380398 | 1.4  | 6.74E-02 | transcription_start_site | + | 380620 | 380620 | -398  | 10180 | AN1715 |
| 1351 | CONTIG26 | 380045 | 380398 | 1.4  | 6.74E-02 | transcription_start_site | + | 382493 | 382493 | -2271 | 10181 | AN1716 |
| 1351 | CONTIG26 | 380045 | 380398 | 1.4  | 6.74E-02 | transcription_start_site | + | 382739 | 382739 | -2517 | 10182 | AN1716 |
| 769  | CONTIG27 | 33976  | 34340  | 1.97 | 2.26E-04 | transcription_start_site | - | 29543  | 29543  | -4615 | 10210 | AN1729 |
| 769  | CONTIG27 | 33976  | 34340  | 1.97 | 2.26E-04 | transcription_start_site | - | 29381  | 29381  | -4777 | 10211 | AN1729 |
| 769  | CONTIG27 | 33976  | 34340  | 1.97 | 2.26E-04 | transcription_start_site | - | 29177  | 29177  | -4981 | 10212 | AN1729 |
| 769  | CONTIG27 | 33976  | 34340  | 1.97 | 2.26E-04 | transcription_start_site | - | 31479  | 31479  | -2679 | 10217 | AN1730 |
| 769  | CONTIG27 | 33976  | 34340  | 1.97 | 2.26E-04 | transcription_start_site | - | 33330  | 33330  | -828  | 10218 | AN1731 |
| 769  | CONTIG27 | 33976  | 34340  | 1.97 | 2.26E-04 | transcription_start_site | - | 32704  | 32704  | -1454 | 10219 | AN1731 |
| 1486 | CONTIG27 | 37206  | 37491  | 1.28 | 1.80E-02 | transcription_start_site | - | 33330  | 33330  | -4018 | 10218 | AN1731 |
| 1486 | CONTIG27 | 37206  | 37491  | 1.28 | 1.80E-02 | transcription_start_site | - | 32704  | 32704  | -4644 | 10219 | AN1731 |
| 769  | CONTIG27 | 33976  | 34340  | 1.97 | 2.26E-04 | transcription_start_site | + | 34994  | 34994  | -836  | 10220 | AN1732 |
| 769  | CONTIG27 | 33976  | 34340  | 1.97 | 2.26E-04 | transcription_start_site | + | 35463  | 35463  | -1305 | 10221 | AN1732 |

|      |          |        |        |      |          |                          |   |        |        |       |       |        |
|------|----------|--------|--------|------|----------|--------------------------|---|--------|--------|-------|-------|--------|
| 769  | CONTIG27 | 33976  | 34340  | 1.97 | 2.26E-04 | transcription_start_site | + | 35630  | 35630  | -1472 | 10222 | AN1732 |
| 769  | CONTIG27 | 33976  | 34340  | 1.97 | 2.26E-04 | transcription_start_site | + | 37477  | 37477  | -3319 | 10223 | AN1733 |
| 769  | CONTIG27 | 33976  | 34340  | 1.97 | 2.26E-04 | transcription_start_site | + | 37653  | 37653  | -3495 | 10224 | AN1733 |
| 769  | CONTIG27 | 33976  | 34340  | 1.97 | 2.26E-04 | transcription_start_site | + | 37808  | 37808  | -3650 | 10225 | AN1733 |
| 769  | CONTIG27 | 33976  | 34340  | 1.97 | 2.26E-04 | transcription_start_site | + | 38216  | 38216  | -4058 | 10226 | AN1733 |
| 1486 | CONTIG27 | 37206  | 37491  | 1.28 | 1.80E-02 | transcription_start_site | + | 37477  | 37477  | -128  | 10223 | AN1733 |
| 1486 | CONTIG27 | 37206  | 37491  | 1.28 | 1.80E-02 | transcription_start_site | + | 37653  | 37653  | -304  | 10224 | AN1733 |
| 1486 | CONTIG27 | 37206  | 37491  | 1.28 | 1.80E-02 | transcription_start_site | + | 37808  | 37808  | -459  | 10225 | AN1733 |
| 1486 | CONTIG27 | 37206  | 37491  | 1.28 | 1.80E-02 | transcription_start_site | + | 38216  | 38216  | -867  | 10226 | AN1733 |
| 1704 | CONTIG27 | 40667  | 41016  | 1.13 | 3.34E-02 | transcription_start_site | - | 40653  | 40653  | -188  | 10227 | AN1734 |
| 1704 | CONTIG27 | 40667  | 41016  | 1.13 | 3.34E-02 | transcription_start_site | - | 40445  | 40445  | -396  | 10228 | AN1734 |
| 2232 | CONTIG27 | 43592  | 44605  | 0.76 | 9.90E-02 | transcription_start_site | - | 40653  | 40653  | -3445 | 10227 | AN1734 |
| 2232 | CONTIG27 | 43592  | 44605  | 0.76 | 9.90E-02 | transcription_start_site | - | 40445  | 40445  | -3653 | 10228 | AN1734 |
| 1704 | CONTIG27 | 40667  | 41016  | 1.13 | 3.34E-02 | transcription_start_site | + | 45965  | 45965  | -5123 | 10229 | AN1736 |
| 2232 | CONTIG27 | 43592  | 44605  | 0.76 | 9.90E-02 | transcription_start_site | + | 45965  | 45965  | -1866 | 10229 | AN1736 |
| 1487 | CONTIG27 | 57006  | 57658  | 1.28 | 1.80E-02 | transcription_start_site | - | 56113  | 56113  | -1219 | 10234 | AN1739 |
| 1487 | CONTIG27 | 57006  | 57658  | 1.28 | 1.80E-02 | transcription_start_site | - | 56007  | 56007  | -1325 | 10235 | AN1739 |
| 1487 | CONTIG27 | 57006  | 57658  | 1.28 | 1.80E-02 | transcription_start_site | - | 55713  | 55713  | -1619 | 10236 | AN1739 |
| 1487 | CONTIG27 | 57006  | 57658  | 1.28 | 1.80E-02 | transcription_start_site | - | 55545  | 55545  | -1787 | 10237 | AN1739 |
| 1487 | CONTIG27 | 57006  | 57658  | 1.28 | 1.80E-02 | transcription_start_site | - | 55205  | 55205  | -2127 | 10238 | AN1739 |
| 1487 | CONTIG27 | 57006  | 57658  | 1.28 | 1.80E-02 | transcription_start_site | - | 54761  | 54761  | -2571 | 10239 | AN1739 |
| 1487 | CONTIG27 | 57006  | 57658  | 1.28 | 1.80E-02 | transcription_start_site | - | 54710  | 54710  | -2622 | 10240 | AN1739 |
| 1487 | CONTIG27 | 57006  | 57658  | 1.28 | 1.80E-02 | transcription_start_site | + | 57254  | 57254  | 78    | 10246 | AN1740 |
| 1487 | CONTIG27 | 57006  | 57658  | 1.28 | 1.80E-02 | transcription_start_site | + | 57133  | 57133  | 199   | 10245 | AN1740 |
| 1487 | CONTIG27 | 57006  | 57658  | 1.28 | 1.80E-02 | transcription_start_site | + | 57695  | 57695  | -363  | 10247 | AN1740 |
| 1487 | CONTIG27 | 57006  | 57658  | 1.28 | 1.80E-02 | transcription_start_site | + | 56906  | 56906  | 426   | 10244 | AN1740 |
| 1487 | CONTIG27 | 57006  | 57658  | 1.28 | 1.80E-02 | transcription_start_site | + | 57953  | 57953  | -621  | 10248 | AN1740 |
| 1487 | CONTIG27 | 57006  | 57658  | 1.28 | 1.80E-02 | transcription_start_site | + | 56584  | 56584  | 748   | 10243 | AN1740 |
| 1487 | CONTIG27 | 57006  | 57658  | 1.28 | 1.80E-02 | transcription_start_site | + | 58089  | 58089  | -757  | 10249 | AN1740 |
| 1487 | CONTIG27 | 57006  | 57658  | 1.28 | 1.80E-02 | transcription_start_site | + | 56464  | 56464  | 868   | 10242 | AN1740 |
| 1487 | CONTIG27 | 57006  | 57658  | 1.28 | 1.80E-02 | transcription_start_site | + | 56261  | 56261  | 1071  | 10241 | AN1740 |
| 1487 | CONTIG27 | 57006  | 57658  | 1.28 | 1.80E-02 | transcription_start_site | - | 58655  | 58655  | 1323  | 10253 | AN1741 |
| 2110 | CONTIG27 | 69696  | 70102  | 0.87 | 9.60E-02 | transcription_start_site | - | 69703  | 69703  | -196  | 10263 | AN1745 |
| 2110 | CONTIG27 | 69696  | 70102  | 0.87 | 9.60E-02 | transcription_start_site | - | 69338  | 69338  | -561  | 10264 | AN1745 |
| 2110 | CONTIG27 | 69696  | 70102  | 0.87 | 9.60E-02 | transcription_start_site | - | 69014  | 69014  | -885  | 10265 | AN1745 |
| 2110 | CONTIG27 | 69696  | 70102  | 0.87 | 9.60E-02 | transcription_start_site | + | 72035  | 72035  | -2136 | 10266 | AN1746 |
| 2110 | CONTIG27 | 69696  | 70102  | 0.87 | 9.60E-02 | transcription_start_site | + | 72387  | 72387  | -2488 | 10267 | AN1746 |
| 2110 | CONTIG27 | 69696  | 70102  | 0.87 | 9.60E-02 | transcription_start_site | + | 72577  | 72577  | -2678 | 10268 | AN1746 |
| 2110 | CONTIG27 | 69696  | 70102  | 0.87 | 9.60E-02 | transcription_start_site | + | 73301  | 73301  | -3402 | 10269 | AN1746 |
| 2110 | CONTIG27 | 69696  | 70102  | 0.87 | 9.60E-02 | transcription_start_site | + | 75006  | 75006  | -5107 | 10270 | AN1746 |
| 2234 | CONTIG27 | 84017  | 84356  | 0.76 | 1.54E-01 | transcription_start_site | - | 79237  | 79237  | -4949 | 10273 | AN1747 |
| 2234 | CONTIG27 | 84017  | 84356  | 0.76 | 1.54E-01 | transcription_start_site | + | 89274  | 89274  | -5087 | 10283 | AN1751 |
| 1705 | CONTIG27 | 97140  | 97496  | 1.13 | 3.34E-02 | transcription_start_site | - | 94090  | 94090  | -3228 | 10284 | AN1752 |
| 1705 | CONTIG27 | 97140  | 97496  | 1.13 | 3.34E-02 | transcription_start_site | - | 96060  | 96060  | -1258 | 10287 | AN1754 |
| 1705 | CONTIG27 | 97140  | 97496  | 1.13 | 3.34E-02 | transcription_start_site | + | 97356  | 97356  | -38   | 10290 | AN1755 |
| 1705 | CONTIG27 | 97140  | 97496  | 1.13 | 3.34E-02 | transcription_start_site | + | 97240  | 97240  | 78    | 10289 | AN1755 |
| 1705 | CONTIG27 | 97140  | 97496  | 1.13 | 3.34E-02 | transcription_start_site | + | 97582  | 97582  | -264  | 10291 | AN1755 |
| 1705 | CONTIG27 | 97140  | 97496  | 1.13 | 3.34E-02 | transcription_start_site | + | 97023  | 97023  | 295   | 10288 | AN1755 |
| 1705 | CONTIG27 | 97140  | 97496  | 1.13 | 3.34E-02 | transcription_start_site | + | 99800  | 99800  | -2482 | 10292 | AN1756 |
| 2254 | CONTIG27 | 105904 | 106928 | 0.73 | 9.04E-02 | transcription_start_site | - | 102463 | 102463 | -3953 | 10293 | AN1757 |
| 2254 | CONTIG27 | 105904 | 106928 | 0.73 | 9.04E-02 | transcription_start_site | - | 102376 | 102376 | -4040 | 10294 | AN1757 |
| 2254 | CONTIG27 | 105904 | 106928 | 0.73 | 9.04E-02 | transcription_start_site | - | 102130 | 102130 | -4286 | 10295 | AN1757 |
| 2254 | CONTIG27 | 105904 | 106928 | 0.73 | 9.04E-02 | transcription_start_site | - | 101650 | 101650 | -4766 | 10296 | AN1757 |
| 328  | CONTIG27 | 107864 | 108358 | 2.56 | 0.00E+00 | transcription_start_site | - | 105821 | 105821 | -2290 | 10299 | AN1759 |
| 328  | CONTIG27 | 107864 | 108358 | 2.56 | 0.00E+00 | transcription_start_site | - | 104795 | 104795 | -3316 | 10300 | AN1759 |
| 2254 | CONTIG27 | 105904 | 106928 | 0.73 | 9.04E-02 | transcription_start_site | - | 105821 | 105821 | -595  | 10299 | AN1759 |
| 2254 | CONTIG27 | 105904 | 106928 | 0.73 | 9.04E-02 | transcription_start_site | - | 104795 | 104795 | -1621 | 10300 | AN1759 |

|      |          |        |        |      |          |                          |   |        |        |       |       |        |
|------|----------|--------|--------|------|----------|--------------------------|---|--------|--------|-------|-------|--------|
| 328  | CONTIG27 | 107864 | 108358 | 2.56 | 0.00E+00 | transcription_start_site | - | 107361 | 107361 | -750  | 10301 | AN1760 |
| 328  | CONTIG27 | 107864 | 108358 | 2.56 | 0.00E+00 | transcription_start_site | - | 106960 | 106960 | -1151 | 10302 | AN1760 |
| 328  | CONTIG27 | 107864 | 108358 | 2.56 | 0.00E+00 | transcription_start_site | - | 106687 | 106687 | -1424 | 10303 | AN1760 |
| 2254 | CONTIG27 | 105904 | 106928 | 0.73 | 9.04E-02 | transcription_start_site | - | 106687 | 106687 | 271   | 10303 | AN1760 |
| 2254 | CONTIG27 | 105904 | 106928 | 0.73 | 9.04E-02 | transcription_start_site | - | 106960 | 106960 | 544   | 10302 | AN1760 |
| 2254 | CONTIG27 | 105904 | 106928 | 0.73 | 9.04E-02 | transcription_start_site | - | 107361 | 107361 | 945   | 10301 | AN1760 |
| 328  | CONTIG27 | 107864 | 108358 | 2.56 | 0.00E+00 | transcription_start_site | + | 108574 | 108574 | -463  | 10304 | AN1761 |
| 328  | CONTIG27 | 107864 | 108358 | 2.56 | 0.00E+00 | transcription_start_site | + | 108954 | 108954 | -843  | 10305 | AN1761 |
| 328  | CONTIG27 | 107864 | 108358 | 2.56 | 0.00E+00 | transcription_start_site | + | 109022 | 109022 | -911  | 10306 | AN1761 |
| 328  | CONTIG27 | 107864 | 108358 | 2.56 | 0.00E+00 | transcription_start_site | + | 109118 | 109118 | -1007 | 10307 | AN1761 |
| 328  | CONTIG27 | 107864 | 108358 | 2.56 | 0.00E+00 | transcription_start_site | + | 109286 | 109286 | -1175 | 10308 | AN1761 |
| 328  | CONTIG27 | 107864 | 108358 | 2.56 | 0.00E+00 | transcription_start_site | + | 109524 | 109524 | -1413 | 10309 | AN1761 |
| 2254 | CONTIG27 | 105904 | 106928 | 0.73 | 9.04E-02 | transcription_start_site | + | 108574 | 108574 | -2158 | 10304 | AN1761 |
| 2254 | CONTIG27 | 105904 | 106928 | 0.73 | 9.04E-02 | transcription_start_site | + | 108954 | 108954 | -2538 | 10305 | AN1761 |
| 2254 | CONTIG27 | 105904 | 106928 | 0.73 | 9.04E-02 | transcription_start_site | + | 109022 | 109022 | -2606 | 10306 | AN1761 |
| 2254 | CONTIG27 | 105904 | 106928 | 0.73 | 9.04E-02 | transcription_start_site | + | 109118 | 109118 | -2702 | 10307 | AN1761 |
| 2254 | CONTIG27 | 105904 | 106928 | 0.73 | 9.04E-02 | transcription_start_site | + | 109286 | 109286 | -2870 | 10308 | AN1761 |
| 2254 | CONTIG27 | 105904 | 106928 | 0.73 | 9.04E-02 | transcription_start_site | + | 109524 | 109524 | -3108 | 10309 | AN1761 |
| 328  | CONTIG27 | 107864 | 108358 | 2.56 | 0.00E+00 | transcription_start_site | + | 112668 | 112668 | -4557 | 10313 | AN1763 |
| 328  | CONTIG27 | 107864 | 108358 | 2.56 | 0.00E+00 | transcription_start_site | + | 113322 | 113322 | -5211 | 10314 | AN1763 |
| 1451 | CONTIG28 | 6021   | 6440   | 1.3  | 7.36E-03 | transcription_start_site | - | 2446   | 2446   | -3784 | 10319 | AN1765 |
| 1451 | CONTIG28 | 6021   | 6440   | 1.3  | 7.36E-03 | transcription_start_site | - | 2357   | 2357   | -3873 | 10320 | AN1765 |
| 1451 | CONTIG28 | 6021   | 6440   | 1.3  | 7.36E-03 | transcription_start_site | - | 2072   | 2072   | -4158 | 10321 | AN1765 |
| 1451 | CONTIG28 | 6021   | 6440   | 1.3  | 7.36E-03 | transcription_start_site | + | 6850   | 6850   | -619  | 10326 | AN1767 |
| 1451 | CONTIG28 | 6021   | 6440   | 1.3  | 7.36E-03 | transcription_start_site | + | 8758   | 8758   | -2527 | 10327 | AN1767 |
| 2096 | CONTIG28 | 17701  | 18285  | 0.88 | 9.60E-02 | transcription_start_site | - | 14914  | 14914  | -3079 | 10333 | AN1770 |
| 2096 | CONTIG28 | 17701  | 18285  | 0.88 | 9.60E-02 | transcription_start_site | - | 14589  | 14589  | -3404 | 10334 | AN1770 |
| 2096 | CONTIG28 | 17701  | 18285  | 0.88 | 9.60E-02 | transcription_start_site | - | 14416  | 14416  | -3577 | 10335 | AN1770 |
| 2096 | CONTIG28 | 17701  | 18285  | 0.88 | 9.60E-02 | transcription_start_site | + | 18099  | 18099  | -106  | 10346 | AN1771 |
| 2096 | CONTIG28 | 17701  | 18285  | 0.88 | 9.60E-02 | transcription_start_site | + | 17821  | 17821  | 172   | 10345 | AN1771 |
| 2096 | CONTIG28 | 17701  | 18285  | 0.88 | 9.60E-02 | transcription_start_site | + | 17736  | 17736  | 257   | 10344 | AN1771 |
| 2096 | CONTIG28 | 17701  | 18285  | 0.88 | 9.60E-02 | transcription_start_site | + | 17493  | 17493  | 500   | 10343 | AN1771 |
| 2096 | CONTIG28 | 17701  | 18285  | 0.88 | 9.60E-02 | transcription_start_site | + | 17302  | 17302  | 691   | 10342 | AN1771 |
| 2096 | CONTIG28 | 17701  | 18285  | 0.88 | 9.60E-02 | transcription_start_site | + | 16801  | 16801  | 1192  | 10341 | AN1771 |
| 2096 | CONTIG28 | 17701  | 18285  | 0.88 | 9.60E-02 | transcription_start_site | + | 18415  | 18415  | -422  | 10347 | AN1772 |
| 2096 | CONTIG28 | 17701  | 18285  | 0.88 | 9.60E-02 | transcription_start_site | + | 18812  | 18812  | -819  | 10348 | AN1772 |
| 2096 | CONTIG28 | 17701  | 18285  | 0.88 | 9.60E-02 | transcription_start_site | + | 20478  | 20478  | -2485 | 10349 | AN1773 |
| 2096 | CONTIG28 | 17701  | 18285  | 0.88 | 9.60E-02 | transcription_start_site | + | 21052  | 21052  | -3059 | 10350 | AN1773 |
| 2001 | CONTIG28 | 88966  | 89397  | 0.94 | 7.66E-02 | transcription_start_site | - | 87318  | 87318  | -1863 | 10426 | AN1794 |
| 2001 | CONTIG28 | 88966  | 89397  | 0.94 | 7.66E-02 | transcription_start_site | - | 86978  | 86978  | -2203 | 10427 | AN1794 |
| 2001 | CONTIG28 | 88966  | 89397  | 0.94 | 7.66E-02 | transcription_start_site | - | 86035  | 86035  | -3146 | 10428 | AN1794 |
| 2001 | CONTIG28 | 88966  | 89397  | 0.94 | 7.66E-02 | transcription_start_site | - | 85904  | 85904  | -3277 | 10429 | AN1794 |
| 2001 | CONTIG28 | 88966  | 89397  | 0.94 | 7.66E-02 | transcription_start_site | - | 85687  | 85687  | -3494 | 10430 | AN1794 |
| 2001 | CONTIG28 | 88966  | 89397  | 0.94 | 7.66E-02 | transcription_start_site | + | 89717  | 89717  | -535  | 10431 | AN1795 |
| 2001 | CONTIG28 | 88966  | 89397  | 0.94 | 7.66E-02 | transcription_start_site | + | 89848  | 89848  | -666  | 10432 | AN1795 |
| 2001 | CONTIG28 | 88966  | 89397  | 0.94 | 7.66E-02 | transcription_start_site | + | 89941  | 89941  | -759  | 10433 | AN1795 |
| 2001 | CONTIG28 | 88966  | 89397  | 0.94 | 7.66E-02 | transcription_start_site | + | 90087  | 90087  | -905  | 10434 | AN1795 |
| 2001 | CONTIG28 | 88966  | 89397  | 0.94 | 7.66E-02 | transcription_start_site | + | 90457  | 90457  | -1275 | 10435 | AN1795 |
| 2001 | CONTIG28 | 88966  | 89397  | 0.94 | 7.66E-02 | transcription_start_site | + | 92144  | 92144  | -2962 | 10436 | AN1796 |
| 2001 | CONTIG28 | 88966  | 89397  | 0.94 | 7.66E-02 | transcription_start_site | + | 92536  | 92536  | -3354 | 10437 | AN1796 |
| 445  | CONTIG28 | 94951  | 95903  | 2.39 | 0.00E+00 | transcription_start_site | + | 96084  | 96084  | -657  | 10438 | AN1797 |
| 445  | CONTIG28 | 94951  | 95903  | 2.39 | 0.00E+00 | transcription_start_site | + | 96237  | 96237  | -810  | 10439 | AN1797 |
| 445  | CONTIG28 | 94951  | 95903  | 2.39 | 0.00E+00 | transcription_start_site | + | 97075  | 97075  | -1648 | 10440 | AN1797 |
| 2272 | CONTIG28 | 97654  | 97943  | 0.71 | 1.97E-01 | transcription_start_site | + | 97075  | 97075  | 723   | 10440 | AN1797 |
| 483  | CONTIG29 | 7277   | 7556   | 2.34 | 5.08E-03 | transcription_start_site | + | 7741   | 7741   | -324  | 10443 | AN1800 |
| 483  | CONTIG29 | 7277   | 7556   | 2.34 | 5.08E-03 | transcription_start_site | + | 7877   | 7877   | -460  | 10444 | AN1800 |
| 483  | CONTIG29 | 7277   | 7556   | 2.34 | 5.08E-03 | transcription_start_site | + | 7964   | 7964   | -547  | 10445 | AN1800 |

|      |          |        |        |      |          |                          |   |        |        |       |       |        |
|------|----------|--------|--------|------|----------|--------------------------|---|--------|--------|-------|-------|--------|
| 483  | CONTIG29 | 7277   | 7556   | 2.34 | 5.08E-03 | transcription_start_site | + | 8571   | 8571   | -1154 | 10446 | AN1800 |
| 483  | CONTIG29 | 7277   | 7556   | 2.34 | 5.08E-03 | transcription_start_site | + | 10782  | 10782  | -3365 | 10447 | AN1800 |
| 483  | CONTIG29 | 7277   | 7556   | 2.34 | 5.08E-03 | transcription_start_site | + | 10953  | 10953  | -3536 | 10448 | AN1800 |
| 483  | CONTIG29 | 7277   | 7556   | 2.34 | 5.08E-03 | transcription_start_site | + | 11144  | 11144  | -3727 | 10449 | AN1800 |
| 414  | CONTIG29 | 26793  | 27052  | 2.43 | 4.01E-03 | transcription_start_site | - | 27823  | 27823  | 900   | 10462 | AN1805 |
| 1849 | CONTIG29 | 52879  | 54062  | 1.04 | 3.16E-02 | transcription_start_site | - | 54383  | 54383  | 912   | 10489 | AN1814 |
| 1849 | CONTIG29 | 52879  | 54062  | 1.04 | 3.16E-02 | transcription_start_site | - | 54677  | 54677  | 1206  | 10488 | AN1814 |
| 1849 | CONTIG29 | 52879  | 54062  | 1.04 | 3.16E-02 | transcription_start_site | - | 54982  | 54982  | 1511  | 10487 | AN1814 |
| 980  | CONTIG29 | 80709  | 81060  | 1.74 | 1.44E-02 | transcription_start_site | - | 80730  | 80730  | -154  | 10514 | AN1824 |
| 980  | CONTIG29 | 80709  | 81060  | 1.74 | 1.44E-02 | transcription_start_site | - | 78853  | 78853  | -2031 | 10515 | AN1824 |
| 980  | CONTIG29 | 80709  | 81060  | 1.74 | 1.44E-02 | transcription_start_site | + | 83121  | 83121  | -2236 | 10517 | AN1826 |
| 980  | CONTIG29 | 80709  | 81060  | 1.74 | 1.44E-02 | transcription_start_site | + | 84013  | 84013  | -3128 | 10518 | AN1826 |
| 1270 | CONTIG29 | 100951 | 101396 | 1.47 | 6.04E-02 | transcription_start_site | - | 97878  | 97878  | -3295 | 10541 | AN1832 |
| 1270 | CONTIG29 | 100951 | 101396 | 1.47 | 6.04E-02 | transcription_start_site | - | 97478  | 97478  | -3695 | 10542 | AN1832 |
| 1270 | CONTIG29 | 100951 | 101396 | 1.47 | 6.04E-02 | transcription_start_site | - | 96989  | 96989  | -4184 | 10543 | AN1832 |
| 1270 | CONTIG29 | 100951 | 101396 | 1.47 | 6.04E-02 | transcription_start_site | + | 101382 | 101382 | -208  | 10548 | AN1834 |
| 1270 | CONTIG29 | 100951 | 101396 | 1.47 | 6.04E-02 | transcription_start_site | + | 102672 | 102672 | -1498 | 10549 | AN1834 |
| 1270 | CONTIG29 | 100951 | 101396 | 1.47 | 6.04E-02 | transcription_start_site | + | 103702 | 103702 | -2528 | 10550 | AN1834 |
| 1270 | CONTIG29 | 100951 | 101396 | 1.47 | 6.04E-02 | transcription_start_site | + | 104312 | 104312 | -3138 | 10551 | AN1835 |
| 1270 | CONTIG29 | 100951 | 101396 | 1.47 | 6.04E-02 | transcription_start_site | + | 104635 | 104635 | -3461 | 10552 | AN1835 |
| 1270 | CONTIG29 | 100951 | 101396 | 1.47 | 6.04E-02 | transcription_start_site | + | 104919 | 104919 | -3745 | 10553 | AN1835 |
| 1270 | CONTIG29 | 100951 | 101396 | 1.47 | 6.04E-02 | transcription_start_site | + | 105428 | 105428 | -4254 | 10554 | AN1835 |
| 509  | CONTIG29 | 113193 | 113532 | 2.3  | 2.49E-03 | transcription_start_site | - | 109386 | 109386 | -3976 | 10555 | AN1837 |
| 509  | CONTIG29 | 113193 | 113532 | 2.3  | 2.49E-03 | transcription_start_site | - | 109035 | 109035 | -4327 | 10556 | AN1837 |
| 509  | CONTIG29 | 113193 | 113532 | 2.3  | 2.49E-03 | transcription_start_site | - | 108895 | 108895 | -4467 | 10557 | AN1837 |
| 509  | CONTIG29 | 113193 | 113532 | 2.3  | 2.49E-03 | transcription_start_site | - | 110929 | 110929 | -2433 | 10558 | AN1838 |
| 509  | CONTIG29 | 113193 | 113532 | 2.3  | 2.49E-03 | transcription_start_site | - | 110675 | 110675 | -2687 | 10559 | AN1838 |
| 509  | CONTIG29 | 113193 | 113532 | 2.3  | 2.49E-03 | transcription_start_site | - | 112786 | 112786 | -576  | 10560 | AN1839 |
| 509  | CONTIG29 | 113193 | 113532 | 2.3  | 2.49E-03 | transcription_start_site | - | 112367 | 112367 | -995  | 10561 | AN1839 |
| 509  | CONTIG29 | 113193 | 113532 | 2.3  | 2.49E-03 | transcription_start_site | - | 112126 | 112126 | -1236 | 10562 | AN1839 |
| 123  | CONTIG29 | 130359 | 130704 | 3.04 | 2.69E-04 | transcription_start_site | - | 127557 | 127557 | -2974 | 10576 | AN1846 |
| 123  | CONTIG29 | 130359 | 130704 | 3.04 | 2.69E-04 | transcription_start_site | - | 126754 | 126754 | -3777 | 10577 | AN1846 |
| 981  | CONTIG29 | 132234 | 132808 | 1.74 | 1.44E-02 | transcription_start_site | - | 127557 | 127557 | -4964 | 10576 | AN1846 |
| 1527 | CONTIG29 | 128329 | 128609 | 1.26 | 1.08E-01 | transcription_start_site | - | 127557 | 127557 | -912  | 10576 | AN1846 |
| 1527 | CONTIG29 | 128329 | 128609 | 1.26 | 1.08E-01 | transcription_start_site | - | 126754 | 126754 | -1715 | 10577 | AN1846 |
| 123  | CONTIG29 | 130359 | 130704 | 3.04 | 2.69E-04 | transcription_start_site | - | 131630 | 131630 | 1098  | 10579 | AN1847 |
| 981  | CONTIG29 | 132234 | 132808 | 1.74 | 1.44E-02 | transcription_start_site | - | 132368 | 132368 | -153  | 10578 | AN1847 |
| 981  | CONTIG29 | 132234 | 132808 | 1.74 | 1.44E-02 | transcription_start_site | - | 131630 | 131630 | -891  | 10579 | AN1847 |
| 1794 | CONTIG29 | 132979 | 133483 | 1.08 | 1.76E-01 | transcription_start_site | - | 132368 | 132368 | -863  | 10578 | AN1847 |
| 1794 | CONTIG29 | 132979 | 133483 | 1.08 | 1.76E-01 | transcription_start_site | - | 131630 | 131630 | -1601 | 10579 | AN1847 |
| 911  | CONTIG29 | 187278 | 187552 | 1.82 | 2.29E-02 | transcription_start_site | - | 186081 | 186081 | -1334 | 10648 | AN1869 |
| 911  | CONTIG29 | 187278 | 187552 | 1.82 | 2.29E-02 | transcription_start_site | - | 185994 | 185994 | -1421 | 10649 | AN1869 |
| 911  | CONTIG29 | 187278 | 187552 | 1.82 | 2.29E-02 | transcription_start_site | - | 185884 | 185884 | -1531 | 10650 | AN1869 |
| 911  | CONTIG29 | 187278 | 187552 | 1.82 | 2.29E-02 | transcription_start_site | + | 187267 | 187267 | 148   | 10651 | AN1870 |
| 911  | CONTIG29 | 187278 | 187552 | 1.82 | 2.29E-02 | transcription_start_site | + | 188055 | 188055 | -640  | 10652 | AN1870 |
| 911  | CONTIG29 | 187278 | 187552 | 1.82 | 2.29E-02 | transcription_start_site | + | 192188 | 192188 | -4773 | 10656 | AN1872 |
| 911  | CONTIG29 | 187278 | 187552 | 1.82 | 2.29E-02 | transcription_start_site | + | 192398 | 192398 | -4983 | 10657 | AN1872 |
| 824  | CONTIG29 | 257637 | 258064 | 1.91 | 1.80E-02 | transcription_start_site | - | 256444 | 256444 | -1406 | 10733 | AN1893 |
| 824  | CONTIG29 | 257637 | 258064 | 1.91 | 1.80E-02 | transcription_start_site | - | 256167 | 256167 | -1683 | 10734 | AN1893 |
| 824  | CONTIG29 | 257637 | 258064 | 1.91 | 1.80E-02 | transcription_start_site | - | 255755 | 255755 | -2095 | 10735 | AN1893 |
| 824  | CONTIG29 | 257637 | 258064 | 1.91 | 1.80E-02 | transcription_start_site | - | 254766 | 254766 | -3084 | 10736 | AN1893 |
| 824  | CONTIG29 | 257637 | 258064 | 1.91 | 1.80E-02 | transcription_start_site | + | 258483 | 258483 | -632  | 10737 | AN1894 |
| 824  | CONTIG29 | 257637 | 258064 | 1.91 | 1.80E-02 | transcription_start_site | + | 258722 | 258722 | -871  | 10738 | AN1894 |
| 824  | CONTIG29 | 257637 | 258064 | 1.91 | 1.80E-02 | transcription_start_site | + | 261357 | 261357 | -3506 | 10739 | AN1895 |
| 333  | CONTIG29 | 276226 | 276739 | 2.56 | 0.00E+00 | transcription_start_site | - | 271445 | 271445 | -5037 | 10750 | AN1900 |
| 164  | CONTIG29 | 286820 | 287469 | 2.91 | 0.00E+00 | transcription_start_site | - | 282330 | 282330 | -4814 | 10762 | AN1902 |
| 164  | CONTIG29 | 286820 | 287469 | 2.91 | 0.00E+00 | transcription_start_site | - | 282184 | 282184 | -4960 | 10763 | AN1902 |



|      |          |        |        |      |          |                          |   |        |        |       |       |        |
|------|----------|--------|--------|------|----------|--------------------------|---|--------|--------|-------|-------|--------|
| 244  | CONTIG29 | 283126 | 283494 | 2.73 | 7.63E-04 | transcription_start_site | - | 282330 | 282330 | -980  | 10762 | AN1902 |
| 244  | CONTIG29 | 283126 | 283494 | 2.73 | 7.63E-04 | transcription_start_site | - | 282184 | 282184 | -1126 | 10763 | AN1902 |
| 751  | CONTIG29 | 330001 | 330359 | 2    | 1.37E-02 | transcription_start_site | - | 329388 | 329388 | -792  | 10813 | AN1917 |
| 751  | CONTIG29 | 330001 | 330359 | 2    | 1.37E-02 | transcription_start_site | - | 328419 | 328419 | -1761 | 10814 | AN1917 |
| 1989 | CONTIG29 | 333676 | 334930 | 0.95 | 1.41E-01 | transcription_start_site | - | 329388 | 329388 | -4915 | 10813 | AN1917 |
| 102  | CONTIG29 | 336301 | 337265 | 3.08 | 0.00E+00 | transcription_start_site | - | 336073 | 336073 | -710  | 10815 | AN1918 |
| 102  | CONTIG29 | 336301 | 337265 | 3.08 | 0.00E+00 | transcription_start_site | - | 335829 | 335829 | -954  | 10816 | AN1918 |
| 102  | CONTIG29 | 336301 | 337265 | 3.08 | 0.00E+00 | transcription_start_site | - | 335692 | 335692 | -1091 | 10817 | AN1918 |
| 102  | CONTIG29 | 336301 | 337265 | 3.08 | 0.00E+00 | transcription_start_site | - | 335218 | 335218 | -1565 | 10818 | AN1918 |
| 671  | CONTIG29 | 337591 | 338150 | 2.08 | 1.06E-02 | transcription_start_site | - | 336073 | 336073 | -1797 | 10815 | AN1918 |
| 671  | CONTIG29 | 337591 | 338150 | 2.08 | 1.06E-02 | transcription_start_site | - | 335829 | 335829 | -2041 | 10816 | AN1918 |
| 671  | CONTIG29 | 337591 | 338150 | 2.08 | 1.06E-02 | transcription_start_site | - | 335692 | 335692 | -2178 | 10817 | AN1918 |
| 671  | CONTIG29 | 337591 | 338150 | 2.08 | 1.06E-02 | transcription_start_site | - | 335218 | 335218 | -2652 | 10818 | AN1918 |
| 1989 | CONTIG29 | 333676 | 334930 | 0.95 | 1.41E-01 | transcription_start_site | - | 335218 | 335218 | 915   | 10818 | AN1918 |
| 1989 | CONTIG29 | 333676 | 334930 | 0.95 | 1.41E-01 | transcription_start_site | - | 335692 | 335692 | 1389  | 10817 | AN1918 |
| 1989 | CONTIG29 | 333676 | 334930 | 0.95 | 1.41E-01 | transcription_start_site | - | 335829 | 335829 | 1526  | 10816 | AN1918 |
| 671  | CONTIG29 | 337591 | 338150 | 2.08 | 1.06E-02 | transcription_start_site | - | 338642 | 338642 | 771   | 10825 | AN1919 |
| 671  | CONTIG29 | 337591 | 338150 | 2.08 | 1.06E-02 | transcription_start_site | - | 338831 | 338831 | 960   | 10824 | AN1919 |
| 671  | CONTIG29 | 337591 | 338150 | 2.08 | 1.06E-02 | transcription_start_site | - | 338986 | 338986 | 1115  | 10823 | AN1919 |
| 1271 | CONTIG29 | 348617 | 348961 | 1.47 | 6.04E-02 | transcription_start_site | - | 345454 | 345454 | -3335 | 10836 | AN1921 |
| 1271 | CONTIG29 | 348617 | 348961 | 1.47 | 6.04E-02 | transcription_start_site | - | 345258 | 345258 | -3531 | 10837 | AN1921 |
| 1271 | CONTIG29 | 348617 | 348961 | 1.47 | 6.04E-02 | transcription_start_site | - | 344722 | 344722 | -4067 | 10838 | AN1921 |
| 1271 | CONTIG29 | 348617 | 348961 | 1.47 | 6.04E-02 | transcription_start_site | + | 347863 | 347863 | 926   | 10841 | AN1922 |
| 1070 | CONTIG29 | 351382 | 351738 | 1.65 | 3.70E-02 | transcription_start_site | + | 350789 | 350789 | 771   | 10844 | AN1923 |
| 1271 | CONTIG29 | 348617 | 348961 | 1.47 | 6.04E-02 | transcription_start_site | + | 349026 | 349026 | -237  | 10842 | AN1923 |
| 1271 | CONTIG29 | 348617 | 348961 | 1.47 | 6.04E-02 | transcription_start_site | + | 349487 | 349487 | -698  | 10843 | AN1923 |
| 1271 | CONTIG29 | 348617 | 348961 | 1.47 | 6.04E-02 | transcription_start_site | + | 350789 | 350789 | -2000 | 10844 | AN1923 |
| 152  | CONTIG29 | 355742 | 356166 | 2.95 | 2.26E-04 | transcription_start_site | - | 354300 | 354300 | -1654 | 10845 | AN1924 |
| 152  | CONTIG29 | 355742 | 356166 | 2.95 | 2.26E-04 | transcription_start_site | - | 354168 | 354168 | -1786 | 10846 | AN1924 |
| 152  | CONTIG29 | 355742 | 356166 | 2.95 | 2.26E-04 | transcription_start_site | - | 353939 | 353939 | -2015 | 10847 | AN1924 |
| 984  | CONTIG29 | 357087 | 357581 | 1.74 | 3.01E-02 | transcription_start_site | - | 354300 | 354300 | -3034 | 10845 | AN1924 |
| 984  | CONTIG29 | 357087 | 357581 | 1.74 | 3.01E-02 | transcription_start_site | - | 354168 | 354168 | -3166 | 10846 | AN1924 |
| 984  | CONTIG29 | 357087 | 357581 | 1.74 | 3.01E-02 | transcription_start_site | - | 353939 | 353939 | -3395 | 10847 | AN1924 |
| 152  | CONTIG29 | 355742 | 356166 | 2.95 | 2.26E-04 | transcription_start_site | - | 356293 | 356293 | 339   | 10850 | AN1925 |
| 152  | CONTIG29 | 355742 | 356166 | 2.95 | 2.26E-04 | transcription_start_site | - | 356368 | 356368 | 414   | 10849 | AN1925 |
| 152  | CONTIG29 | 355742 | 356166 | 2.95 | 2.26E-04 | transcription_start_site | - | 356559 | 356559 | 605   | 10848 | AN1925 |
| 984  | CONTIG29 | 357087 | 357581 | 1.74 | 3.01E-02 | transcription_start_site | - | 356559 | 356559 | -775  | 10848 | AN1925 |
| 984  | CONTIG29 | 357087 | 357581 | 1.74 | 3.01E-02 | transcription_start_site | - | 356368 | 356368 | -966  | 10849 | AN1925 |
| 984  | CONTIG29 | 357087 | 357581 | 1.74 | 3.01E-02 | transcription_start_site | - | 356293 | 356293 | -1041 | 10850 | AN1925 |
| 984  | CONTIG29 | 357087 | 357581 | 1.74 | 3.01E-02 | transcription_start_site | - | 358090 | 358090 | 756   | 10853 | AN1926 |
| 984  | CONTIG29 | 357087 | 357581 | 1.74 | 3.01E-02 | transcription_start_site | + | 361527 | 361527 | -4193 | 10854 | AN1927 |
| 984  | CONTIG29 | 357087 | 357581 | 1.74 | 3.01E-02 | transcription_start_site | + | 362019 | 362019 | -4685 | 10855 | AN1927 |
| 984  | CONTIG29 | 357087 | 357581 | 1.74 | 3.01E-02 | transcription_start_site | + | 362183 | 362183 | -4849 | 10856 | AN1927 |
| 984  | CONTIG29 | 357087 | 357581 | 1.74 | 3.01E-02 | transcription_start_site | + | 362433 | 362433 | -5099 | 10857 | AN1927 |
| 137  | CONTIG29 | 371115 | 371685 | 2.99 | 0.00E+00 | transcription_start_site | - | 366385 | 366385 | -5015 | 10860 | AN1928 |
| 2058 | CONTIG29 | 369770 | 370489 | 0.91 | 1.64E-01 | transcription_start_site | - | 366385 | 366385 | -3744 | 10860 | AN1928 |
| 2058 | CONTIG29 | 369770 | 370489 | 0.91 | 1.64E-01 | transcription_start_site | - | 365913 | 365913 | -4216 | 10861 | AN1928 |
| 2058 | CONTIG29 | 369770 | 370489 | 0.91 | 1.64E-01 | transcription_start_site | - | 365579 | 365579 | -4550 | 10862 | AN1928 |
| 2058 | CONTIG29 | 369770 | 370489 | 0.91 | 1.64E-01 | transcription_start_site | - | 365139 | 365139 | -4990 | 10863 | AN1928 |
| 137  | CONTIG29 | 371115 | 371685 | 2.99 | 0.00E+00 | transcription_start_site | + | 372426 | 372426 | -1026 | 10867 | AN1930 |
| 137  | CONTIG29 | 371115 | 371685 | 2.99 | 0.00E+00 | transcription_start_site | + | 372645 | 372645 | -1245 | 10868 | AN1930 |
| 137  | CONTIG29 | 371115 | 371685 | 2.99 | 0.00E+00 | transcription_start_site | + | 372758 | 372758 | -1358 | 10869 | AN1930 |
| 137  | CONTIG29 | 371115 | 371685 | 2.99 | 0.00E+00 | transcription_start_site | + | 372903 | 372903 | -1503 | 10870 | AN1930 |
| 137  | CONTIG29 | 371115 | 371685 | 2.99 | 0.00E+00 | transcription_start_site | + | 373324 | 373324 | -1924 | 10871 | AN1930 |
| 137  | CONTIG29 | 371115 | 371685 | 2.99 | 0.00E+00 | transcription_start_site | + | 373456 | 373456 | -2056 | 10872 | AN1930 |
| 2058 | CONTIG29 | 369770 | 370489 | 0.91 | 1.64E-01 | transcription_start_site | + | 372426 | 372426 | -2296 | 10867 | AN1930 |
| 2058 | CONTIG29 | 369770 | 370489 | 0.91 | 1.64E-01 | transcription_start_site | + | 372645 | 372645 | -2515 | 10868 | AN1930 |

|      |          |        |        |      |          |                          |   |        |        |       |       |        |
|------|----------|--------|--------|------|----------|--------------------------|---|--------|--------|-------|-------|--------|
| 2058 | CONTIG29 | 369770 | 370489 | 0.91 | 1.64E-01 | transcription_start_site | + | 372758 | 372758 | -2628 | 10869 | AN1930 |
| 2058 | CONTIG29 | 369770 | 370489 | 0.91 | 1.64E-01 | transcription_start_site | + | 372903 | 372903 | -2773 | 10870 | AN1930 |
| 2058 | CONTIG29 | 369770 | 370489 | 0.91 | 1.64E-01 | transcription_start_site | + | 373324 | 373324 | -3194 | 10871 | AN1930 |
| 2058 | CONTIG29 | 369770 | 370489 | 0.91 | 1.64E-01 | transcription_start_site | + | 373456 | 373456 | -3326 | 10872 | AN1930 |
| 714  | CONTIG29 | 378001 | 378295 | 2.04 | 1.25E-02 | transcription_start_site | - | 376414 | 376414 | -1734 | 10873 | AN1931 |
| 714  | CONTIG29 | 378001 | 378295 | 2.04 | 1.25E-02 | transcription_start_site | - | 376225 | 376225 | -1923 | 10874 | AN1931 |
| 714  | CONTIG29 | 378001 | 378295 | 2.04 | 1.25E-02 | transcription_start_site | - | 376000 | 376000 | -2148 | 10875 | AN1931 |
| 714  | CONTIG29 | 378001 | 378295 | 2.04 | 1.25E-02 | transcription_start_site | - | 375900 | 375900 | -2248 | 10876 | AN1931 |
| 714  | CONTIG29 | 378001 | 378295 | 2.04 | 1.25E-02 | transcription_start_site | - | 375743 | 375743 | -2405 | 10877 | AN1931 |
| 88   | CONTIG29 | 393305 | 393804 | 3.12 | 0.00E+00 | transcription_start_site | - | 389780 | 389780 | -3774 | 10885 | AN1935 |
| 88   | CONTIG29 | 393305 | 393804 | 3.12 | 0.00E+00 | transcription_start_site | - | 389429 | 389429 | -4125 | 10886 | AN1935 |
| 2209 | CONTIG29 | 390685 | 391779 | 0.78 | 1.13E-01 | transcription_start_site | - | 389780 | 389780 | -1452 | 10885 | AN1935 |
| 2209 | CONTIG29 | 390685 | 391779 | 0.78 | 1.13E-01 | transcription_start_site | - | 389429 | 389429 | -1803 | 10886 | AN1935 |
| 2209 | CONTIG29 | 390685 | 391779 | 0.78 | 1.13E-01 | transcription_start_site | + | 390610 | 390610 | 622   | 10889 | AN1936 |
| 2209 | CONTIG29 | 390685 | 391779 | 0.78 | 1.13E-01 | transcription_start_site | + | 390394 | 390394 | 838   | 10888 | AN1936 |
| 2209 | CONTIG29 | 390685 | 391779 | 0.78 | 1.13E-01 | transcription_start_site | + | 390254 | 390254 | 978   | 10887 | AN1936 |
| 88   | CONTIG29 | 393305 | 393804 | 3.12 | 0.00E+00 | transcription_start_site | - | 393221 | 393221 | -333  | 10890 | AN1937 |
| 88   | CONTIG29 | 393305 | 393804 | 3.12 | 0.00E+00 | transcription_start_site | + | 398251 | 398251 | -4696 | 10891 | AN1938 |
| 88   | CONTIG29 | 393305 | 393804 | 3.12 | 0.00E+00 | transcription_start_site | + | 398358 | 398358 | -4803 | 10892 | AN1938 |
| 1721 | CONTIG29 | 405696 | 406279 | 1.13 | 1.54E-01 | transcription_start_site | + | 406741 | 406741 | -753  | 10895 | AN1940 |
| 1721 | CONTIG29 | 405696 | 406279 | 1.13 | 1.54E-01 | transcription_start_site | + | 409080 | 409080 | -3092 | 10896 | AN1940 |
| 634  | CONTIG29 | 430363 | 430702 | 2.13 | 3.78E-03 | transcription_start_site | - | 428466 | 428466 | -2066 | 10916 | AN1948 |
| 362  | CONTIG29 | 435612 | 436111 | 2.52 | 1.14E-03 | transcription_start_site | - | 432924 | 432924 | -2937 | 10919 | AN1949 |
| 362  | CONTIG29 | 435612 | 436111 | 2.52 | 1.14E-03 | transcription_start_site | - | 432261 | 432261 | -3600 | 10920 | AN1949 |
| 362  | CONTIG29 | 435612 | 436111 | 2.52 | 1.14E-03 | transcription_start_site | - | 431490 | 431490 | -4371 | 10921 | AN1949 |
| 362  | CONTIG29 | 435612 | 436111 | 2.52 | 1.14E-03 | transcription_start_site | - | 431162 | 431162 | -4699 | 10922 | AN1949 |
| 634  | CONTIG29 | 430363 | 430702 | 2.13 | 3.78E-03 | transcription_start_site | - | 431162 | 431162 | 629   | 10922 | AN1949 |
| 634  | CONTIG29 | 430363 | 430702 | 2.13 | 3.78E-03 | transcription_start_site | - | 431490 | 431490 | 957   | 10921 | AN1949 |
| 362  | CONTIG29 | 435612 | 436111 | 2.52 | 1.14E-03 | transcription_start_site | + | 436765 | 436765 | -903  | 10923 | AN1950 |
| 362  | CONTIG29 | 435612 | 436111 | 2.52 | 1.14E-03 | transcription_start_site | + | 437188 | 437188 | -1326 | 10924 | AN1950 |
| 362  | CONTIG29 | 435612 | 436111 | 2.52 | 1.14E-03 | transcription_start_site | + | 440095 | 440095 | -4233 | 10925 | AN1951 |
| 362  | CONTIG29 | 435612 | 436111 | 2.52 | 1.14E-03 | transcription_start_site | + | 440231 | 440231 | -4369 | 10926 | AN1951 |
| 362  | CONTIG29 | 435612 | 436111 | 2.52 | 1.14E-03 | transcription_start_site | + | 440417 | 440417 | -4555 | 10927 | AN1951 |
| 362  | CONTIG29 | 435612 | 436111 | 2.52 | 1.14E-03 | transcription_start_site | + | 440533 | 440533 | -4671 | 10928 | AN1951 |
| 166  | CONTIG29 | 443114 | 443468 | 2.91 | 2.06E-04 | transcription_start_site | + | 444024 | 444024 | -733  | 10929 | AN1952 |
| 713  | CONTIG29 | 442129 | 443018 | 2.04 | 4.92E-03 | transcription_start_site | + | 444024 | 444024 | -1450 | 10929 | AN1952 |
| 484  | CONTIG29 | 461416 | 461825 | 2.34 | 5.08E-03 | transcription_start_site | - | 458600 | 458600 | -3020 | 10937 | AN1956 |
| 484  | CONTIG29 | 461416 | 461825 | 2.34 | 5.08E-03 | transcription_start_site | - | 458329 | 458329 | -3291 | 10938 | AN1956 |
| 484  | CONTIG29 | 461416 | 461825 | 2.34 | 5.08E-03 | transcription_start_site | + | 461058 | 461058 | 562   | 10942 | AN1957 |
| 484  | CONTIG29 | 461416 | 461825 | 2.34 | 5.08E-03 | transcription_start_site | + | 460621 | 460621 | 999   | 10941 | AN1957 |
| 3    | CONTIG29 | 464558 | 464903 | 3.64 | 0.00E+00 | transcription_start_site | + | 464432 | 464432 | 298   | 10944 | AN1958 |
| 3    | CONTIG29 | 464558 | 464903 | 3.64 | 0.00E+00 | transcription_start_site | + | 464152 | 464152 | 578   | 10943 | AN1958 |
| 484  | CONTIG29 | 461416 | 461825 | 2.34 | 5.08E-03 | transcription_start_site | + | 464152 | 464152 | -2531 | 10943 | AN1958 |
| 484  | CONTIG29 | 461416 | 461825 | 2.34 | 5.08E-03 | transcription_start_site | + | 464432 | 464432 | -2811 | 10944 | AN1958 |
| 3    | CONTIG29 | 464558 | 464903 | 3.64 | 0.00E+00 | transcription_start_site | + | 465956 | 465956 | -1225 | 10945 | AN1959 |
| 3    | CONTIG29 | 464558 | 464903 | 3.64 | 0.00E+00 | transcription_start_site | + | 466089 | 466089 | -1358 | 10946 | AN1959 |
| 3    | CONTIG29 | 464558 | 464903 | 3.64 | 0.00E+00 | transcription_start_site | + | 466198 | 466198 | -1467 | 10947 | AN1959 |
| 3    | CONTIG29 | 464558 | 464903 | 3.64 | 0.00E+00 | transcription_start_site | + | 466419 | 466419 | -1688 | 10948 | AN1959 |
| 3    | CONTIG29 | 464558 | 464903 | 3.64 | 0.00E+00 | transcription_start_site | + | 466578 | 466578 | -1847 | 10949 | AN1959 |
| 3    | CONTIG29 | 464558 | 464903 | 3.64 | 0.00E+00 | transcription_start_site | + | 466710 | 466710 | -1979 | 10950 | AN1959 |
| 3    | CONTIG29 | 464558 | 464903 | 3.64 | 0.00E+00 | transcription_start_site | + | 466843 | 466843 | -2112 | 10951 | AN1959 |
| 3    | CONTIG29 | 464558 | 464903 | 3.64 | 0.00E+00 | transcription_start_site | + | 467009 | 467009 | -2278 | 10952 | AN1959 |
| 3    | CONTIG29 | 464558 | 464903 | 3.64 | 0.00E+00 | transcription_start_site | + | 467449 | 467449 | -2718 | 10953 | AN1959 |
| 3    | CONTIG29 | 464558 | 464903 | 3.64 | 0.00E+00 | transcription_start_site | + | 467636 | 467636 | -2905 | 10954 | AN1959 |
| 167  | CONTIG29 | 465467 | 465886 | 2.91 | 2.06E-04 | transcription_start_site | + | 465956 | 465956 | -279  | 10945 | AN1959 |
| 167  | CONTIG29 | 465467 | 465886 | 2.91 | 2.06E-04 | transcription_start_site | + | 466089 | 466089 | -412  | 10946 | AN1959 |
| 167  | CONTIG29 | 465467 | 465886 | 2.91 | 2.06E-04 | transcription_start_site | + | 466198 | 466198 | -521  | 10947 | AN1959 |

|      |          |        |        |      |          |                          |   |        |        |       |       |        |
|------|----------|--------|--------|------|----------|--------------------------|---|--------|--------|-------|-------|--------|
| 167  | CONTIG29 | 465467 | 465886 | 2.91 | 2.06E-04 | transcription_start_site | + | 466419 | 466419 | -742  | 10948 | AN1959 |
| 167  | CONTIG29 | 465467 | 465886 | 2.91 | 2.06E-04 | transcription_start_site | + | 466578 | 466578 | -901  | 10949 | AN1959 |
| 167  | CONTIG29 | 465467 | 465886 | 2.91 | 2.06E-04 | transcription_start_site | + | 466710 | 466710 | -1033 | 10950 | AN1959 |
| 167  | CONTIG29 | 465467 | 465886 | 2.91 | 2.06E-04 | transcription_start_site | + | 466843 | 466843 | -1166 | 10951 | AN1959 |
| 167  | CONTIG29 | 465467 | 465886 | 2.91 | 2.06E-04 | transcription_start_site | + | 467009 | 467009 | -1332 | 10952 | AN1959 |
| 167  | CONTIG29 | 465467 | 465886 | 2.91 | 2.06E-04 | transcription_start_site | + | 467449 | 467449 | -1772 | 10953 | AN1959 |
| 167  | CONTIG29 | 465467 | 465886 | 2.91 | 2.06E-04 | transcription_start_site | + | 467636 | 467636 | -1959 | 10954 | AN1959 |
| 484  | CONTIG29 | 461416 | 461825 | 2.34 | 5.08E-03 | transcription_start_site | + | 465956 | 465956 | -4335 | 10945 | AN1959 |
| 484  | CONTIG29 | 461416 | 461825 | 2.34 | 5.08E-03 | transcription_start_site | + | 466089 | 466089 | -4468 | 10946 | AN1959 |
| 484  | CONTIG29 | 461416 | 461825 | 2.34 | 5.08E-03 | transcription_start_site | + | 466198 | 466198 | -4577 | 10947 | AN1959 |
| 484  | CONTIG29 | 461416 | 461825 | 2.34 | 5.08E-03 | transcription_start_site | + | 466419 | 466419 | -4798 | 10948 | AN1959 |
| 484  | CONTIG29 | 461416 | 461825 | 2.34 | 5.08E-03 | transcription_start_site | + | 466578 | 466578 | -4957 | 10949 | AN1959 |
| 484  | CONTIG29 | 461416 | 461825 | 2.34 | 5.08E-03 | transcription_start_site | + | 466710 | 466710 | -5089 | 10950 | AN1959 |
| 3    | CONTIG29 | 464558 | 464903 | 3.64 | 0.00E+00 | transcription_start_site | + | 468518 | 468518 | -3787 | 10955 | AN1960 |
| 3    | CONTIG29 | 464558 | 464903 | 3.64 | 0.00E+00 | transcription_start_site | + | 468702 | 468702 | -3971 | 10956 | AN1960 |
| 167  | CONTIG29 | 465467 | 465886 | 2.91 | 2.06E-04 | transcription_start_site | + | 468518 | 468518 | -2841 | 10955 | AN1960 |
| 167  | CONTIG29 | 465467 | 465886 | 2.91 | 2.06E-04 | transcription_start_site | + | 468702 | 468702 | -3025 | 10956 | AN1960 |
| 867  | CONTIG30 | 14868  | 15434  | 1.87 | 1.37E-02 | transcription_start_site | - | 13758  | 13758  | -1393 | 11033 | AN1983 |
| 867  | CONTIG30 | 14868  | 15434  | 1.87 | 1.37E-02 | transcription_start_site | - | 13153  | 13153  | -1998 | 11034 | AN1983 |
| 867  | CONTIG30 | 14868  | 15434  | 1.87 | 1.37E-02 | transcription_start_site | + | 15866  | 15866  | -715  | 11035 | AN1984 |
| 867  | CONTIG30 | 14868  | 15434  | 1.87 | 1.37E-02 | transcription_start_site | + | 16031  | 16031  | -880  | 11036 | AN1984 |
| 867  | CONTIG30 | 14868  | 15434  | 1.87 | 1.37E-02 | transcription_start_site | + | 18078  | 18078  | -2927 | 11037 | AN1984 |
| 1696 | CONTIG30 | 32046  | 32610  | 1.14 | 1.22E-01 | transcription_start_site | - | 29608  | 29608  | -2720 | 11042 | AN1989 |
| 1696 | CONTIG30 | 32046  | 32610  | 1.14 | 1.22E-01 | transcription_start_site | - | 29443  | 29443  | -2885 | 11043 | AN1989 |
| 1696 | CONTIG30 | 32046  | 32610  | 1.14 | 1.22E-01 | transcription_start_site | - | 28904  | 28904  | -3424 | 11044 | AN1989 |
| 1696 | CONTIG30 | 32046  | 32610  | 1.14 | 1.22E-01 | transcription_start_site | - | 28719  | 28719  | -3609 | 11045 | AN1989 |
| 1696 | CONTIG30 | 32046  | 32610  | 1.14 | 1.22E-01 | transcription_start_site | - | 32051  | 32051  | -277  | 11046 | AN1990 |
| 1696 | CONTIG30 | 32046  | 32610  | 1.14 | 1.22E-01 | transcription_start_site | - | 31930  | 31930  | -398  | 11047 | AN1990 |
| 1696 | CONTIG30 | 32046  | 32610  | 1.14 | 1.22E-01 | transcription_start_site | - | 31649  | 31649  | -679  | 11048 | AN1990 |
| 1696 | CONTIG30 | 32046  | 32610  | 1.14 | 1.22E-01 | transcription_start_site | - | 31514  | 31514  | -814  | 11049 | AN1990 |
| 1696 | CONTIG30 | 32046  | 32610  | 1.14 | 1.22E-01 | transcription_start_site | - | 31393  | 31393  | -935  | 11050 | AN1990 |
| 2076 | CONTIG30 | 42157  | 42729  | 0.9  | 1.81E-01 | transcription_start_site | + | 42757  | 42757  | -314  | 11052 | AN1993 |
| 2076 | CONTIG30 | 42157  | 42729  | 0.9  | 1.81E-01 | transcription_start_site | + | 42946  | 42946  | -503  | 11053 | AN1993 |
| 2076 | CONTIG30 | 42157  | 42729  | 0.9  | 1.81E-01 | transcription_start_site | + | 43145  | 43145  | -702  | 11054 | AN1993 |
| 2076 | CONTIG30 | 42157  | 42729  | 0.9  | 1.81E-01 | transcription_start_site | + | 43839  | 43839  | -1396 | 11055 | AN1993 |
| 2076 | CONTIG30 | 42157  | 42729  | 0.9  | 1.81E-01 | transcription_start_site | + | 44177  | 44177  | -1734 | 11056 | AN1993 |
| 2076 | CONTIG30 | 42157  | 42729  | 0.9  | 1.81E-01 | transcription_start_site | + | 44289  | 44289  | -1846 | 11057 | AN1993 |
| 1516 | CONTIG30 | 47942  | 49176  | 1.26 | 3.47E-02 | transcription_start_site | - | 47912  | 47912  | -647  | 11058 | AN1994 |
| 1516 | CONTIG30 | 47942  | 49176  | 1.26 | 3.47E-02 | transcription_start_site | - | 47728  | 47728  | -831  | 11059 | AN1994 |
| 1516 | CONTIG30 | 47942  | 49176  | 1.26 | 3.47E-02 | transcription_start_site | - | 47485  | 47485  | -1074 | 11060 | AN1994 |
| 1516 | CONTIG30 | 47942  | 49176  | 1.26 | 3.47E-02 | transcription_start_site | - | 46892  | 46892  | -1667 | 11061 | AN1994 |
| 1516 | CONTIG30 | 47942  | 49176  | 1.26 | 3.47E-02 | transcription_start_site | + | 48824  | 48824  | -265  | 11062 | AN1995 |
| 1516 | CONTIG30 | 47942  | 49176  | 1.26 | 3.47E-02 | transcription_start_site | + | 49029  | 49029  | -470  | 11063 | AN1995 |
| 1516 | CONTIG30 | 47942  | 49176  | 1.26 | 3.47E-02 | transcription_start_site | + | 49283  | 49283  | -724  | 11064 | AN1995 |
| 1516 | CONTIG30 | 47942  | 49176  | 1.26 | 3.47E-02 | transcription_start_site | + | 52680  | 52680  | -4121 | 11065 | AN1996 |
| 1516 | CONTIG30 | 47942  | 49176  | 1.26 | 3.47E-02 | transcription_start_site | + | 52805  | 52805  | -4246 | 11066 | AN1996 |
| 173  | CONTIG30 | 60076  | 60378  | 2.89 | 0.00E+00 | transcription_start_site | - | 57449  | 57449  | -2778 | 11069 | AN1997 |
| 173  | CONTIG30 | 60076  | 60378  | 2.89 | 0.00E+00 | transcription_start_site | - | 57028  | 57028  | -3199 | 11070 | AN1997 |
| 173  | CONTIG30 | 60076  | 60378  | 2.89 | 0.00E+00 | transcription_start_site | - | 56829  | 56829  | -3398 | 11071 | AN1997 |
| 173  | CONTIG30 | 60076  | 60378  | 2.89 | 0.00E+00 | transcription_start_site | + | 64170  | 64170  | -3943 | 11074 | AN1999 |
| 294  | CONTIG30 | 73971  | 74225  | 2.64 | 7.06E-04 | transcription_start_site | - | 69040  | 69040  | -5058 | 11075 | AN2000 |
| 470  | CONTIG30 | 69387  | 69651  | 2.36 | 2.61E-03 | transcription_start_site | - | 69040  | 69040  | -479  | 11075 | AN2000 |
| 470  | CONTIG30 | 69387  | 69651  | 2.36 | 2.61E-03 | transcription_start_site | - | 68957  | 68957  | -562  | 11076 | AN2000 |
| 470  | CONTIG30 | 69387  | 69651  | 2.36 | 2.61E-03 | transcription_start_site | - | 68683  | 68683  | -836  | 11077 | AN2000 |
| 294  | CONTIG30 | 73971  | 74225  | 2.64 | 7.06E-04 | transcription_start_site | - | 73418  | 73418  | -680  | 11078 | AN2001 |
| 294  | CONTIG30 | 73971  | 74225  | 2.64 | 7.06E-04 | transcription_start_site | - | 72263  | 72263  | -1835 | 11079 | AN2001 |
| 294  | CONTIG30 | 73971  | 74225  | 2.64 | 7.06E-04 | transcription_start_site | - | 71958  | 71958  | -2140 | 11080 | AN2001 |

|      |          |       |       |      |          |                          |   |       |       |       |       |        |
|------|----------|-------|-------|------|----------|--------------------------|---|-------|-------|-------|-------|--------|
| 294  | CONTIG30 | 73971 | 74225 | 2.64 | 7.06E-04 | transcription_start_site | - | 71360 | 71360 | -2738 | 11081 | AN2001 |
| 294  | CONTIG30 | 73971 | 74225 | 2.64 | 7.06E-04 | transcription_start_site | - | 71113 | 71113 | -2985 | 11082 | AN2001 |
| 1883 | CONTIG30 | 74931 | 75672 | 1.02 | 9.04E-02 | transcription_start_site | - | 73418 | 73418 | -1883 | 11078 | AN2001 |
| 1883 | CONTIG30 | 74931 | 75672 | 1.02 | 9.04E-02 | transcription_start_site | - | 72263 | 72263 | -3038 | 11079 | AN2001 |
| 1883 | CONTIG30 | 74931 | 75672 | 1.02 | 9.04E-02 | transcription_start_site | - | 71958 | 71958 | -3343 | 11080 | AN2001 |
| 1883 | CONTIG30 | 74931 | 75672 | 1.02 | 9.04E-02 | transcription_start_site | - | 71360 | 71360 | -3941 | 11081 | AN2001 |
| 1883 | CONTIG30 | 74931 | 75672 | 1.02 | 9.04E-02 | transcription_start_site | - | 71113 | 71113 | -4188 | 11082 | AN2001 |
| 294  | CONTIG30 | 73971 | 74225 | 2.64 | 7.06E-04 | transcription_start_site | + | 76396 | 76396 | -2298 | 11083 | AN2002 |
| 294  | CONTIG30 | 73971 | 74225 | 2.64 | 7.06E-04 | transcription_start_site | + | 77034 | 77034 | -2936 | 11084 | AN2002 |
| 294  | CONTIG30 | 73971 | 74225 | 2.64 | 7.06E-04 | transcription_start_site | + | 77236 | 77236 | -3138 | 11085 | AN2002 |
| 294  | CONTIG30 | 73971 | 74225 | 2.64 | 7.06E-04 | transcription_start_site | + | 77364 | 77364 | -3266 | 11086 | AN2002 |
| 294  | CONTIG30 | 73971 | 74225 | 2.64 | 7.06E-04 | transcription_start_site | + | 77538 | 77538 | -3440 | 11087 | AN2002 |
| 294  | CONTIG30 | 73971 | 74225 | 2.64 | 7.06E-04 | transcription_start_site | + | 77707 | 77707 | -3609 | 11088 | AN2002 |
| 294  | CONTIG30 | 73971 | 74225 | 2.64 | 7.06E-04 | transcription_start_site | + | 78033 | 78033 | -3935 | 11089 | AN2002 |
| 1883 | CONTIG30 | 74931 | 75672 | 1.02 | 9.04E-02 | transcription_start_site | + | 76396 | 76396 | -1094 | 11083 | AN2002 |
| 1883 | CONTIG30 | 74931 | 75672 | 1.02 | 9.04E-02 | transcription_start_site | + | 77034 | 77034 | -1732 | 11084 | AN2002 |
| 1883 | CONTIG30 | 74931 | 75672 | 1.02 | 9.04E-02 | transcription_start_site | + | 77236 | 77236 | -1934 | 11085 | AN2002 |
| 1883 | CONTIG30 | 74931 | 75672 | 1.02 | 9.04E-02 | transcription_start_site | + | 77364 | 77364 | -2062 | 11086 | AN2002 |
| 1883 | CONTIG30 | 74931 | 75672 | 1.02 | 9.04E-02 | transcription_start_site | + | 77538 | 77538 | -2236 | 11087 | AN2002 |
| 1883 | CONTIG30 | 74931 | 75672 | 1.02 | 9.04E-02 | transcription_start_site | + | 77707 | 77707 | -2405 | 11088 | AN2002 |
| 1883 | CONTIG30 | 74931 | 75672 | 1.02 | 9.04E-02 | transcription_start_site | + | 78033 | 78033 | -2731 | 11089 | AN2002 |
| 641  | CONTIG30 | 89488 | 89762 | 2.12 | 7.08E-03 | transcription_start_site | - | 86144 | 86144 | -3481 | 11090 | AN2004 |
| 641  | CONTIG30 | 89488 | 89762 | 2.12 | 7.08E-03 | transcription_start_site | - | 85982 | 85982 | -3643 | 11091 | AN2004 |
| 641  | CONTIG30 | 89488 | 89762 | 2.12 | 7.08E-03 | transcription_start_site | - | 85397 | 85397 | -4228 | 11092 | AN2004 |
| 641  | CONTIG30 | 89488 | 89762 | 2.12 | 7.08E-03 | transcription_start_site | - | 88569 | 88569 | -1056 | 11093 | AN2005 |
| 641  | CONTIG30 | 89488 | 89762 | 2.12 | 7.08E-03 | transcription_start_site | - | 88466 | 88466 | -1159 | 11094 | AN2005 |
| 641  | CONTIG30 | 89488 | 89762 | 2.12 | 7.08E-03 | transcription_start_site | - | 88250 | 88250 | -1375 | 11095 | AN2005 |
| 135  | CONTIG32 | 7880  | 8314  | 2.99 | 0.00E+00 | transcription_start_site | - | 6198  | 6198  | -1899 | 11104 | AN2009 |
| 135  | CONTIG32 | 7880  | 8314  | 2.99 | 0.00E+00 | transcription_start_site | - | 5810  | 5810  | -2287 | 11105 | AN2009 |
| 135  | CONTIG32 | 7880  | 8314  | 2.99 | 0.00E+00 | transcription_start_site | - | 5550  | 5550  | -2547 | 11106 | AN2009 |
| 815  | CONTIG32 | 18611 | 19120 | 1.91 | 5.38E-03 | transcription_start_site | - | 18136 | 18136 | -729  | 11109 | AN2011 |
| 1535 | CONTIG32 | 23476 | 23924 | 1.25 | 9.60E-02 | transcription_start_site | - | 23476 | 23476 | -224  | 11110 | AN2012 |
| 1535 | CONTIG32 | 23476 | 23924 | 1.25 | 9.60E-02 | transcription_start_site | - | 23294 | 23294 | -406  | 11111 | AN2012 |
| 1535 | CONTIG32 | 23476 | 23924 | 1.25 | 9.60E-02 | transcription_start_site | - | 23061 | 23061 | -639  | 11112 | AN2012 |
| 1535 | CONTIG32 | 23476 | 23924 | 1.25 | 9.60E-02 | transcription_start_site | - | 22337 | 22337 | -1363 | 11113 | AN2012 |
| 1535 | CONTIG32 | 23476 | 23924 | 1.25 | 9.60E-02 | transcription_start_site | - | 21400 | 21400 | -2300 | 11114 | AN2012 |
| 1535 | CONTIG32 | 23476 | 23924 | 1.25 | 9.60E-02 | transcription_start_site | + | 24455 | 24455 | -755  | 11115 | AN2013 |
| 304  | CONTIG32 | 28818 | 29230 | 2.62 | 1.09E-03 | transcription_start_site | - | 27940 | 27940 | -1084 | 11116 | AN2014 |
| 304  | CONTIG32 | 28818 | 29230 | 2.62 | 1.09E-03 | transcription_start_site | - | 27561 | 27561 | -1463 | 11117 | AN2014 |
| 304  | CONTIG32 | 28818 | 29230 | 2.62 | 1.09E-03 | transcription_start_site | - | 27234 | 27234 | -1790 | 11118 | AN2014 |
| 304  | CONTIG32 | 28818 | 29230 | 2.62 | 1.09E-03 | transcription_start_site | - | 27040 | 27040 | -1984 | 11119 | AN2014 |
| 304  | CONTIG32 | 28818 | 29230 | 2.62 | 1.09E-03 | transcription_start_site | + | 29761 | 29761 | -737  | 11120 | AN2015 |
| 255  | CONTIG32 | 34739 | 35088 | 2.7  | 7.06E-04 | transcription_start_site | - | 34223 | 34223 | -690  | 11121 | AN2016 |
| 255  | CONTIG32 | 34739 | 35088 | 2.7  | 7.06E-04 | transcription_start_site | - | 33202 | 33202 | -1711 | 11122 | AN2016 |
| 255  | CONTIG32 | 34739 | 35088 | 2.7  | 7.06E-04 | transcription_start_site | - | 32674 | 32674 | -2239 | 11123 | AN2016 |
| 255  | CONTIG32 | 34739 | 35088 | 2.7  | 7.06E-04 | transcription_start_site | + | 35862 | 35862 | -948  | 11124 | AN2017 |
| 255  | CONTIG32 | 34739 | 35088 | 2.7  | 7.06E-04 | transcription_start_site | + | 36636 | 36636 | -1722 | 11125 | AN2017 |
| 255  | CONTIG32 | 34739 | 35088 | 2.7  | 7.06E-04 | transcription_start_site | + | 37090 | 37090 | -2176 | 11126 | AN2017 |
| 255  | CONTIG32 | 34739 | 35088 | 2.7  | 7.06E-04 | transcription_start_site | + | 37305 | 37305 | -2391 | 11127 | AN2017 |
| 255  | CONTIG32 | 34739 | 35088 | 2.7  | 7.06E-04 | transcription_start_site | + | 39330 | 39330 | -4416 | 11128 | AN2018 |
| 255  | CONTIG32 | 34739 | 35088 | 2.7  | 7.06E-04 | transcription_start_site | + | 39534 | 39534 | -4620 | 11129 | AN2018 |
| 255  | CONTIG32 | 34739 | 35088 | 2.7  | 7.06E-04 | transcription_start_site | + | 39733 | 39733 | -4819 | 11130 | AN2018 |
| 255  | CONTIG32 | 34739 | 35088 | 2.7  | 7.06E-04 | transcription_start_site | + | 39902 | 39902 | -4988 | 11131 | AN2018 |
| 46   | CONTIG32 | 47032 | 47481 | 3.24 | 0.00E+00 | transcription_start_site | - | 47991 | 47991 | 734   | 11140 | AN2020 |
| 47   | CONTIG32 | 52971 | 53300 | 3.24 | 0.00E+00 | transcription_start_site | - | 48894 | 48894 | -4241 | 11138 | AN2020 |
| 47   | CONTIG32 | 52971 | 53300 | 3.24 | 0.00E+00 | transcription_start_site | - | 48672 | 48672 | -4463 | 11139 | AN2020 |
| 47   | CONTIG32 | 52971 | 53300 | 3.24 | 0.00E+00 | transcription_start_site | - | 47991 | 47991 | -5144 | 11140 | AN2020 |

|      |          |        |        |      |          |                          |   |        |        |       |       |        |
|------|----------|--------|--------|------|----------|--------------------------|---|--------|--------|-------|-------|--------|
| 561  | CONTIG32 | 49367  | 49701  | 2.24 | 5.08E-03 | transcription_start_site | - | 48894  | 48894  | -640  | 11138 | AN2020 |
| 561  | CONTIG32 | 49367  | 49701  | 2.24 | 5.08E-03 | transcription_start_site | - | 48672  | 48672  | -862  | 11139 | AN2020 |
| 561  | CONTIG32 | 49367  | 49701  | 2.24 | 5.08E-03 | transcription_start_site | - | 47991  | 47991  | -1543 | 11140 | AN2020 |
| 711  | CONTIG32 | 122188 | 122532 | 2.04 | 3.78E-03 | transcription_start_site | - | 120334 | 120334 | -2026 | 11173 | AN2036 |
| 711  | CONTIG32 | 122188 | 122532 | 2.04 | 3.78E-03 | transcription_start_site | - | 120234 | 120234 | -2126 | 11174 | AN2036 |
| 711  | CONTIG32 | 122188 | 122532 | 2.04 | 3.78E-03 | transcription_start_site | - | 119733 | 119733 | -2627 | 11175 | AN2036 |
| 711  | CONTIG32 | 122188 | 122532 | 2.04 | 3.78E-03 | transcription_start_site | - | 119139 | 119139 | -3221 | 11176 | AN2036 |
| 711  | CONTIG32 | 122188 | 122532 | 2.04 | 3.78E-03 | transcription_start_site | - | 118596 | 118596 | -3764 | 11177 | AN2036 |
| 752  | CONTIG32 | 139584 | 140078 | 1.99 | 1.03E-03 | transcription_start_site | - | 139171 | 139171 | -660  | 11193 | AN2042 |
| 752  | CONTIG32 | 139584 | 140078 | 1.99 | 1.03E-03 | transcription_start_site | - | 139119 | 139119 | -712  | 11194 | AN2042 |
| 752  | CONTIG32 | 139584 | 140078 | 1.99 | 1.03E-03 | transcription_start_site | - | 137149 | 137149 | -2682 | 11195 | AN2042 |
| 592  | CONTIG32 | 168685 | 169194 | 2.2  | 6.24E-03 | transcription_start_site | - | 167911 | 167911 | -1028 | 11239 | AN2054 |
| 592  | CONTIG32 | 168685 | 169194 | 2.2  | 6.24E-03 | transcription_start_site | - | 166672 | 166672 | -2267 | 11240 | AN2054 |
| 592  | CONTIG32 | 168685 | 169194 | 2.2  | 6.24E-03 | transcription_start_site | - | 166319 | 166319 | -2620 | 11241 | AN2054 |
| 592  | CONTIG32 | 168685 | 169194 | 2.2  | 6.24E-03 | transcription_start_site | + | 169638 | 169638 | -698  | 11242 | AN2055 |
| 592  | CONTIG32 | 168685 | 169194 | 2.2  | 6.24E-03 | transcription_start_site | + | 170030 | 170030 | -1090 | 11243 | AN2055 |
| 592  | CONTIG32 | 168685 | 169194 | 2.2  | 6.24E-03 | transcription_start_site | + | 172164 | 172164 | -3224 | 11244 | AN2056 |
| 592  | CONTIG32 | 168685 | 169194 | 2.2  | 6.24E-03 | transcription_start_site | + | 172308 | 172308 | -3368 | 11245 | AN2056 |
| 592  | CONTIG32 | 168685 | 169194 | 2.2  | 6.24E-03 | transcription_start_site | + | 173229 | 173229 | -4289 | 11246 | AN2056 |
| 592  | CONTIG32 | 168685 | 169194 | 2.2  | 6.24E-03 | transcription_start_site | + | 174046 | 174046 | -5106 | 11247 | AN2057 |
| 790  | CONTIG32 | 209786 | 210517 | 1.95 | 4.92E-03 | transcription_start_site | - | 205135 | 205135 | -5016 | 11276 | AN2066 |
| 790  | CONTIG32 | 209786 | 210517 | 1.95 | 4.92E-03 | transcription_start_site | - | 205013 | 205013 | -5138 | 11277 | AN2066 |
| 790  | CONTIG32 | 209786 | 210517 | 1.95 | 4.92E-03 | transcription_start_site | - | 204877 | 204877 | -5274 | 11278 | AN2066 |
| 790  | CONTIG32 | 209786 | 210517 | 1.95 | 4.92E-03 | transcription_start_site | - | 209022 | 209022 | -1129 | 11285 | AN2067 |
| 790  | CONTIG32 | 209786 | 210517 | 1.95 | 4.92E-03 | transcription_start_site | - | 206964 | 206964 | -3187 | 11286 | AN2067 |
| 790  | CONTIG32 | 209786 | 210517 | 1.95 | 4.92E-03 | transcription_start_site | - | 206812 | 206812 | -3339 | 11287 | AN2067 |
| 790  | CONTIG32 | 209786 | 210517 | 1.95 | 4.92E-03 | transcription_start_site | - | 206429 | 206429 | -3722 | 11288 | AN2067 |
| 790  | CONTIG32 | 209786 | 210517 | 1.95 | 4.92E-03 | transcription_start_site | + | 212683 | 212683 | -2531 | 11289 | AN2068 |
| 790  | CONTIG32 | 209786 | 210517 | 1.95 | 4.92E-03 | transcription_start_site | + | 213135 | 213135 | -2983 | 11290 | AN2068 |
| 790  | CONTIG32 | 209786 | 210517 | 1.95 | 4.92E-03 | transcription_start_site | + | 213439 | 213439 | -3287 | 11291 | AN2068 |
| 1793 | CONTIG32 | 225169 | 225518 | 1.08 | 1.54E-01 | transcription_start_site | - | 221907 | 221907 | -3436 | 11296 | AN2070 |
| 1793 | CONTIG32 | 225169 | 225518 | 1.08 | 1.54E-01 | transcription_start_site | - | 224881 | 224881 | -462  | 11297 | AN2071 |
| 1793 | CONTIG32 | 225169 | 225518 | 1.08 | 1.54E-01 | transcription_start_site | - | 224624 | 224624 | -719  | 11298 | AN2071 |
| 1793 | CONTIG32 | 225169 | 225518 | 1.08 | 1.54E-01 | transcription_start_site | - | 224288 | 224288 | -1055 | 11299 | AN2071 |
| 1793 | CONTIG32 | 225169 | 225518 | 1.08 | 1.54E-01 | transcription_start_site | - | 223473 | 223473 | -1870 | 11300 | AN2071 |
| 1793 | CONTIG32 | 225169 | 225518 | 1.08 | 1.54E-01 | transcription_start_site | + | 225550 | 225550 | -206  | 11301 | AN2072 |
| 1793 | CONTIG32 | 225169 | 225518 | 1.08 | 1.54E-01 | transcription_start_site | + | 226067 | 226067 | -723  | 11302 | AN2072 |
| 1913 | CONTIG32 | 234760 | 235344 | 1    | 1.97E-01 | transcription_start_site | - | 235137 | 235137 | 85    | 11303 | AN2073 |
| 1913 | CONTIG32 | 234760 | 235344 | 1    | 1.97E-01 | transcription_start_site | - | 234593 | 234593 | -459  | 11304 | AN2073 |
| 1913 | CONTIG32 | 234760 | 235344 | 1    | 1.97E-01 | transcription_start_site | - | 231310 | 231310 | -3742 | 11305 | AN2073 |
| 1974 | CONTIG32 | 242554 | 242908 | 0.96 | 1.57E-01 | transcription_start_site | - | 238149 | 238149 | -4582 | 11306 | AN2074 |
| 1913 | CONTIG32 | 234760 | 235344 | 1    | 1.97E-01 | transcription_start_site | + | 239113 | 239113 | -4061 | 11308 | AN2075 |
| 1913 | CONTIG32 | 234760 | 235344 | 1    | 1.97E-01 | transcription_start_site | + | 239466 | 239466 | -4414 | 11309 | AN2075 |
| 1913 | CONTIG32 | 234760 | 235344 | 1    | 1.97E-01 | transcription_start_site | + | 239768 | 239768 | -4716 | 11310 | AN2075 |
| 1913 | CONTIG32 | 234760 | 235344 | 1    | 1.97E-01 | transcription_start_site | + | 240022 | 240022 | -4970 | 11311 | AN2075 |
| 1974 | CONTIG32 | 242554 | 242908 | 0.96 | 1.57E-01 | transcription_start_site | + | 243481 | 243481 | -750  | 11313 | AN2076 |
| 1974 | CONTIG32 | 242554 | 242908 | 0.96 | 1.57E-01 | transcription_start_site | + | 243776 | 243776 | -1045 | 11314 | AN2076 |
| 1974 | CONTIG32 | 242554 | 242908 | 0.96 | 1.57E-01 | transcription_start_site | + | 243938 | 243938 | -1207 | 11315 | AN2076 |
| 1609 | CONTIG32 | 263404 | 263905 | 1.2  | 1.08E-01 | transcription_start_site | - | 258676 | 258676 | -4978 | 11325 | AN2080 |
| 1609 | CONTIG32 | 263404 | 263905 | 1.2  | 1.08E-01 | transcription_start_site | - | 263247 | 263247 | -407  | 11332 | AN2082 |
| 1609 | CONTIG32 | 263404 | 263905 | 1.2  | 1.08E-01 | transcription_start_site | - | 262168 | 262168 | -1486 | 11333 | AN2082 |
| 127  | CONTIG32 | 270016 | 270520 | 3.03 | 0.00E+00 | transcription_start_site | - | 265338 | 265338 | -4930 | 11334 | AN2083 |
| 150  | CONTIG32 | 268895 | 269906 | 2.95 | 0.00E+00 | transcription_start_site | - | 265338 | 265338 | -4062 | 11334 | AN2083 |
| 127  | CONTIG32 | 270016 | 270520 | 3.03 | 0.00E+00 | transcription_start_site | + | 272006 | 272006 | -1738 | 11335 | AN2084 |
| 127  | CONTIG32 | 270016 | 270520 | 3.03 | 0.00E+00 | transcription_start_site | + | 272724 | 272724 | -2456 | 11336 | AN2084 |
| 127  | CONTIG32 | 270016 | 270520 | 3.03 | 0.00E+00 | transcription_start_site | + | 273163 | 273163 | -2895 | 11337 | AN2084 |
| 150  | CONTIG32 | 268895 | 269906 | 2.95 | 0.00E+00 | transcription_start_site | + | 272006 | 272006 | -2605 | 11335 | AN2084 |

|      |          |        |        |      |          |                          |   |        |        |       |       |        |
|------|----------|--------|--------|------|----------|--------------------------|---|--------|--------|-------|-------|--------|
| 150  | CONTIG32 | 268895 | 269906 | 2.95 | 0.00E+00 | transcription_start_site | + | 272724 | 272724 | -3323 | 11336 | AN2084 |
| 150  | CONTIG32 | 268895 | 269906 | 2.95 | 0.00E+00 | transcription_start_site | + | 273163 | 273163 | -3762 | 11337 | AN2084 |
| 868  | CONTIG32 | 314629 | 314996 | 1.87 | 1.54E-02 | transcription_start_site | - | 311288 | 311288 | -3524 | 11374 | AN2096 |
| 868  | CONTIG32 | 314629 | 314996 | 1.87 | 1.54E-02 | transcription_start_site | - | 310974 | 310974 | -3838 | 11375 | AN2096 |
| 868  | CONTIG32 | 314629 | 314996 | 1.87 | 1.54E-02 | transcription_start_site | - | 310846 | 310846 | -3966 | 11376 | AN2096 |
| 1135 | CONTIG32 | 312769 | 313188 | 1.58 | 1.83E-02 | transcription_start_site | - | 311288 | 311288 | -1690 | 11374 | AN2096 |
| 1135 | CONTIG32 | 312769 | 313188 | 1.58 | 1.83E-02 | transcription_start_site | - | 310974 | 310974 | -2004 | 11375 | AN2096 |
| 1135 | CONTIG32 | 312769 | 313188 | 1.58 | 1.83E-02 | transcription_start_site | - | 310846 | 310846 | -2132 | 11376 | AN2096 |
| 1135 | CONTIG32 | 312769 | 313188 | 1.58 | 1.83E-02 | transcription_start_site | - | 309129 | 309129 | -3849 | 11377 | AN2096 |
| 1135 | CONTIG32 | 312769 | 313188 | 1.58 | 1.83E-02 | transcription_start_site | - | 308990 | 308990 | -3988 | 11378 | AN2096 |
| 868  | CONTIG32 | 314629 | 314996 | 1.87 | 1.54E-02 | transcription_start_site | - | 313425 | 313425 | -1387 | 11379 | AN2097 |
| 868  | CONTIG32 | 314629 | 314996 | 1.87 | 1.54E-02 | transcription_start_site | - | 313229 | 313229 | -1583 | 11380 | AN2097 |
| 868  | CONTIG32 | 314629 | 314996 | 1.87 | 1.54E-02 | transcription_start_site | - | 312613 | 312613 | -2199 | 11381 | AN2097 |
| 868  | CONTIG32 | 314629 | 314996 | 1.87 | 1.54E-02 | transcription_start_site | - | 312384 | 312384 | -2428 | 11382 | AN2097 |
| 1135 | CONTIG32 | 312769 | 313188 | 1.58 | 1.83E-02 | transcription_start_site | - | 313229 | 313229 | 250   | 11380 | AN2097 |
| 1135 | CONTIG32 | 312769 | 313188 | 1.58 | 1.83E-02 | transcription_start_site | - | 312613 | 312613 | -365  | 11381 | AN2097 |
| 1135 | CONTIG32 | 312769 | 313188 | 1.58 | 1.83E-02 | transcription_start_site | - | 313425 | 313425 | 446   | 11379 | AN2097 |
| 1135 | CONTIG32 | 312769 | 313188 | 1.58 | 1.83E-02 | transcription_start_site | - | 312384 | 312384 | -594  | 11382 | AN2097 |
| 868  | CONTIG32 | 314629 | 314996 | 1.87 | 1.54E-02 | transcription_start_site | + | 314222 | 314222 | 590   | 11387 | AN2098 |
| 868  | CONTIG32 | 314629 | 314996 | 1.87 | 1.54E-02 | transcription_start_site | + | 314072 | 314072 | 740   | 11386 | AN2098 |
| 868  | CONTIG32 | 314629 | 314996 | 1.87 | 1.54E-02 | transcription_start_site | + | 313973 | 313973 | 839   | 11385 | AN2098 |
| 868  | CONTIG32 | 314629 | 314996 | 1.87 | 1.54E-02 | transcription_start_site | + | 313908 | 313908 | 904   | 11384 | AN2098 |
| 868  | CONTIG32 | 314629 | 314996 | 1.87 | 1.54E-02 | transcription_start_site | + | 313825 | 313825 | 987   | 11383 | AN2098 |
| 1135 | CONTIG32 | 312769 | 313188 | 1.58 | 1.83E-02 | transcription_start_site | + | 313825 | 313825 | -846  | 11383 | AN2098 |
| 1135 | CONTIG32 | 312769 | 313188 | 1.58 | 1.83E-02 | transcription_start_site | + | 313908 | 313908 | -929  | 11384 | AN2098 |
| 1135 | CONTIG32 | 312769 | 313188 | 1.58 | 1.83E-02 | transcription_start_site | + | 313973 | 313973 | -994  | 11385 | AN2098 |
| 1135 | CONTIG32 | 312769 | 313188 | 1.58 | 1.83E-02 | transcription_start_site | + | 314072 | 314072 | -1093 | 11386 | AN2098 |
| 1135 | CONTIG32 | 312769 | 313188 | 1.58 | 1.83E-02 | transcription_start_site | + | 314222 | 314222 | -1243 | 11387 | AN2098 |
| 868  | CONTIG32 | 314629 | 314996 | 1.87 | 1.54E-02 | transcription_start_site | + | 315316 | 315316 | -503  | 11388 | AN2099 |
| 868  | CONTIG32 | 314629 | 314996 | 1.87 | 1.54E-02 | transcription_start_site | + | 315628 | 315628 | -815  | 11389 | AN2099 |
| 868  | CONTIG32 | 314629 | 314996 | 1.87 | 1.54E-02 | transcription_start_site | + | 315979 | 315979 | -1166 | 11390 | AN2099 |
| 1135 | CONTIG32 | 312769 | 313188 | 1.58 | 1.83E-02 | transcription_start_site | + | 315316 | 315316 | -2337 | 11388 | AN2099 |
| 1135 | CONTIG32 | 312769 | 313188 | 1.58 | 1.83E-02 | transcription_start_site | + | 315628 | 315628 | -2649 | 11389 | AN2099 |
| 1135 | CONTIG32 | 312769 | 313188 | 1.58 | 1.83E-02 | transcription_start_site | + | 315979 | 315979 | -3000 | 11390 | AN2099 |
| 868  | CONTIG32 | 314629 | 314996 | 1.87 | 1.54E-02 | transcription_start_site | + | 317381 | 317381 | -2568 | 11391 | AN2100 |
| 1135 | CONTIG32 | 312769 | 313188 | 1.58 | 1.83E-02 | transcription_start_site | + | 317381 | 317381 | -4402 | 11391 | AN2100 |
| 756  | CONTIG32 | 320264 | 320528 | 1.99 | 1.06E-02 | transcription_start_site | + | 319888 | 319888 | 508   | 11392 | AN2101 |
| 868  | CONTIG32 | 314629 | 314996 | 1.87 | 1.54E-02 | transcription_start_site | + | 319888 | 319888 | -5075 | 11392 | AN2101 |
| 756  | CONTIG32 | 320264 | 320528 | 1.99 | 1.06E-02 | transcription_start_site | + | 325094 | 325094 | -4698 | 11399 | AN2104 |
| 136  | CONTIG32 | 340366 | 340795 | 2.99 | 0.00E+00 | transcription_start_site | + | 343418 | 343418 | -2837 | 11407 | AN2108 |
| 136  | CONTIG32 | 340366 | 340795 | 2.99 | 0.00E+00 | transcription_start_site | + | 343644 | 343644 | -3063 | 11408 | AN2108 |
| 136  | CONTIG32 | 340366 | 340795 | 2.99 | 0.00E+00 | transcription_start_site | + | 344125 | 344125 | -3544 | 11409 | AN2108 |
| 136  | CONTIG32 | 340366 | 340795 | 2.99 | 0.00E+00 | transcription_start_site | + | 344351 | 344351 | -3770 | 11410 | AN2108 |
| 136  | CONTIG32 | 340366 | 340795 | 2.99 | 0.00E+00 | transcription_start_site | + | 344503 | 344503 | -3922 | 11411 | AN2108 |
| 136  | CONTIG32 | 340366 | 340795 | 2.99 | 0.00E+00 | transcription_start_site | + | 344600 | 344600 | -4019 | 11412 | AN2108 |
| 1289 | CONTIG32 | 338941 | 339510 | 1.45 | 2.66E-02 | transcription_start_site | + | 343418 | 343418 | -4192 | 11407 | AN2108 |
| 1289 | CONTIG32 | 338941 | 339510 | 1.45 | 2.66E-02 | transcription_start_site | + | 343644 | 343644 | -4418 | 11408 | AN2108 |
| 1289 | CONTIG32 | 338941 | 339510 | 1.45 | 2.66E-02 | transcription_start_site | + | 344125 | 344125 | -4899 | 11409 | AN2108 |
| 1289 | CONTIG32 | 338941 | 339510 | 1.45 | 2.66E-02 | transcription_start_site | + | 344351 | 344351 | -5125 | 11410 | AN2108 |
| 1289 | CONTIG32 | 338941 | 339510 | 1.45 | 2.66E-02 | transcription_start_site | + | 344503 | 344503 | -5277 | 11411 | AN2108 |
| 186  | CONTIG32 | 362871 | 363295 | 2.87 | 2.51E-04 | transcription_start_site | - | 359115 | 359115 | -3968 | 11420 | AN2113 |
| 186  | CONTIG32 | 362871 | 363295 | 2.87 | 2.51E-04 | transcription_start_site | - | 358839 | 358839 | -4244 | 11421 | AN2113 |
| 186  | CONTIG32 | 362871 | 363295 | 2.87 | 2.51E-04 | transcription_start_site | - | 358630 | 358630 | -4453 | 11422 | AN2113 |
| 186  | CONTIG32 | 362871 | 363295 | 2.87 | 2.51E-04 | transcription_start_site | - | 357973 | 357973 | -5110 | 11423 | AN2113 |
| 822  | CONTIG32 | 360226 | 360590 | 1.91 | 1.37E-02 | transcription_start_site | - | 359115 | 359115 | -1293 | 11420 | AN2113 |
| 822  | CONTIG32 | 360226 | 360590 | 1.91 | 1.37E-02 | transcription_start_site | - | 358839 | 358839 | -1569 | 11421 | AN2113 |
| 822  | CONTIG32 | 360226 | 360590 | 1.91 | 1.37E-02 | transcription_start_site | - | 358630 | 358630 | -1778 | 11422 | AN2113 |



|      |          |        |        |      |          |                          |   |        |        |       |       |        |
|------|----------|--------|--------|------|----------|--------------------------|---|--------|--------|-------|-------|--------|
| 822  | CONTIG32 | 360226 | 360590 | 1.91 | 1.37E-02 | transcription_start_site | - | 357973 | 357973 | -2435 | 11423 | AN2113 |
| 186  | CONTIG32 | 362871 | 363295 | 2.87 | 2.51E-04 | transcription_start_site | + | 364723 | 364723 | -1640 | 11424 | AN2114 |
| 186  | CONTIG32 | 362871 | 363295 | 2.87 | 2.51E-04 | transcription_start_site | + | 365487 | 365487 | -2404 | 11425 | AN2114 |
| 186  | CONTIG32 | 362871 | 363295 | 2.87 | 2.51E-04 | transcription_start_site | + | 365766 | 365766 | -2683 | 11426 | AN2114 |
| 822  | CONTIG32 | 360226 | 360590 | 1.91 | 1.37E-02 | transcription_start_site | + | 364723 | 364723 | -4315 | 11424 | AN2114 |
| 822  | CONTIG32 | 360226 | 360590 | 1.91 | 1.37E-02 | transcription_start_site | + | 365487 | 365487 | -5079 | 11425 | AN2114 |
| 1230 | CONTIG32 | 426982 | 427486 | 1.5  | 2.30E-02 | transcription_start_site | - | 425993 | 425993 | -1241 | 11471 | AN2130 |
| 1230 | CONTIG32 | 426982 | 427486 | 1.5  | 2.30E-02 | transcription_start_site | - | 422772 | 422772 | -4462 | 11472 | AN2130 |
| 1230 | CONTIG32 | 426982 | 427486 | 1.5  | 2.30E-02 | transcription_start_site | - | 422477 | 422477 | -4757 | 11473 | AN2130 |
| 330  | CONTIG34 | 7351   | 7722   | 2.56 | 0.00E+00 | transcription_start_site | - | 3195   | 3195   | -4341 | 11476 | AN2132 |
| 330  | CONTIG34 | 7351   | 7722   | 2.56 | 0.00E+00 | transcription_start_site | - | 6844   | 6844   | -692  | 11482 | AN2134 |
| 330  | CONTIG34 | 7351   | 7722   | 2.56 | 0.00E+00 | transcription_start_site | - | 6117   | 6117   | -1419 | 11483 | AN2134 |
| 330  | CONTIG34 | 7351   | 7722   | 2.56 | 0.00E+00 | transcription_start_site | - | 6051   | 6051   | -1485 | 11484 | AN2134 |
| 330  | CONTIG34 | 7351   | 7722   | 2.56 | 0.00E+00 | transcription_start_site | - | 5844   | 5844   | -1692 | 11485 | AN2134 |
| 330  | CONTIG34 | 7351   | 7722   | 2.56 | 0.00E+00 | transcription_start_site | - | 5735   | 5735   | -1801 | 11486 | AN2134 |
| 330  | CONTIG34 | 7351   | 7722   | 2.56 | 0.00E+00 | transcription_start_site | - | 5371   | 5371   | -2165 | 11487 | AN2134 |
| 330  | CONTIG34 | 7351   | 7722   | 2.56 | 0.00E+00 | transcription_start_site | - | 4957   | 4957   | -2579 | 11488 | AN2134 |
| 799  | CONTIG34 | 42920  | 43254  | 1.94 | 3.37E-03 | transcription_start_site | - | 39010  | 39010  | -4077 | 11510 | AN2143 |
| 799  | CONTIG34 | 42920  | 43254  | 1.94 | 3.37E-03 | transcription_start_site | - | 38453  | 38453  | -4634 | 11511 | AN2143 |
| 799  | CONTIG34 | 42920  | 43254  | 1.94 | 3.37E-03 | transcription_start_site | - | 42921  | 42921  | -166  | 11513 | AN2145 |
| 799  | CONTIG34 | 42920  | 43254  | 1.94 | 3.37E-03 | transcription_start_site | - | 42450  | 42450  | -637  | 11514 | AN2145 |
| 799  | CONTIG34 | 42920  | 43254  | 1.94 | 3.37E-03 | transcription_start_site | + | 44646  | 44646  | -1559 | 11515 | AN2146 |
| 799  | CONTIG34 | 42920  | 43254  | 1.94 | 3.37E-03 | transcription_start_site | + | 44723  | 44723  | -1636 | 11516 | AN2146 |
| 946  | CONTIG34 | 86177  | 86536  | 1.77 | 7.08E-03 | transcription_start_site | + | 88745  | 88745  | -2388 | 11560 | AN2160 |
| 946  | CONTIG34 | 86177  | 86536  | 1.77 | 7.08E-03 | transcription_start_site | + | 88932  | 88932  | -2575 | 11561 | AN2160 |
| 946  | CONTIG34 | 86177  | 86536  | 1.77 | 7.08E-03 | transcription_start_site | + | 89797  | 89797  | -3440 | 11562 | AN2160 |
| 946  | CONTIG34 | 86177  | 86536  | 1.77 | 7.08E-03 | transcription_start_site | + | 90049  | 90049  | -3692 | 11563 | AN2160 |
| 1924 | CONTIG34 | 91742  | 92018  | 0.99 | 1.08E-01 | transcription_start_site | - | 91441  | 91441  | -439  | 11564 | AN2161 |
| 1924 | CONTIG34 | 91742  | 92018  | 0.99 | 1.08E-01 | transcription_start_site | + | 92910  | 92910  | -1030 | 11565 | AN2162 |
| 1924 | CONTIG34 | 91742  | 92018  | 0.99 | 1.08E-01 | transcription_start_site | + | 93551  | 93551  | -1671 | 11566 | AN2162 |
| 1924 | CONTIG34 | 91742  | 92018  | 0.99 | 1.08E-01 | transcription_start_site | + | 93861  | 93861  | -1981 | 11567 | AN2162 |
| 1455 | CONTIG34 | 99244  | 99583  | 1.3  | 1.83E-02 | transcription_start_site | - | 97503  | 97503  | -1910 | 11568 | AN2163 |
| 1455 | CONTIG34 | 99244  | 99583  | 1.3  | 1.83E-02 | transcription_start_site | + | 99581  | 99581  | -167  | 11569 | AN2164 |
| 1455 | CONTIG34 | 99244  | 99583  | 1.3  | 1.83E-02 | transcription_start_site | + | 103453 | 103453 | -4039 | 11570 | AN2165 |
| 1455 | CONTIG34 | 99244  | 99583  | 1.3  | 1.83E-02 | transcription_start_site | + | 104390 | 104390 | -4976 | 11571 | AN2165 |
| 2178 | CONTIG34 | 102689 | 102968 | 0.82 | 1.97E-01 | transcription_start_site | + | 103453 | 103453 | -624  | 11570 | AN2165 |
| 2178 | CONTIG34 | 102689 | 102968 | 0.82 | 1.97E-01 | transcription_start_site | + | 104390 | 104390 | -1561 | 11571 | AN2165 |
| 2178 | CONTIG34 | 102689 | 102968 | 0.82 | 1.97E-01 | transcription_start_site | + | 106334 | 106334 | -3505 | 11573 | AN2167 |
| 2178 | CONTIG34 | 102689 | 102968 | 0.82 | 1.97E-01 | transcription_start_site | + | 106496 | 106496 | -3667 | 11574 | AN2167 |
| 2178 | CONTIG34 | 102689 | 102968 | 0.82 | 1.97E-01 | transcription_start_site | + | 106710 | 106710 | -3881 | 11575 | AN2167 |
| 2178 | CONTIG34 | 102689 | 102968 | 0.82 | 1.97E-01 | transcription_start_site | + | 106921 | 106921 | -4092 | 11576 | AN2167 |
| 1045 | CONTIG34 | 113194 | 113614 | 1.67 | 9.96E-03 | transcription_start_site | - | 110815 | 110815 | -2589 | 11577 | AN2168 |
| 1045 | CONTIG34 | 113194 | 113614 | 1.67 | 9.96E-03 | transcription_start_site | - | 110175 | 110175 | -3229 | 11578 | AN2168 |
| 1075 | CONTIG34 | 112204 | 112566 | 1.64 | 1.06E-02 | transcription_start_site | - | 110815 | 110815 | -1570 | 11577 | AN2168 |
| 1075 | CONTIG34 | 112204 | 112566 | 1.64 | 1.06E-02 | transcription_start_site | - | 110175 | 110175 | -2210 | 11578 | AN2168 |
| 1075 | CONTIG34 | 112204 | 112566 | 1.64 | 1.06E-02 | transcription_start_site | + | 111450 | 111450 | 935   | 11579 | AN2169 |
| 1045 | CONTIG34 | 113194 | 113614 | 1.67 | 9.96E-03 | transcription_start_site | + | 113323 | 113323 | 81    | 11580 | AN2170 |
| 1045 | CONTIG34 | 113194 | 113614 | 1.67 | 9.96E-03 | transcription_start_site | + | 113593 | 113593 | -189  | 11581 | AN2170 |
| 1075 | CONTIG34 | 112204 | 112566 | 1.64 | 1.06E-02 | transcription_start_site | + | 113323 | 113323 | -938  | 11580 | AN2170 |
| 1075 | CONTIG34 | 112204 | 112566 | 1.64 | 1.06E-02 | transcription_start_site | + | 113593 | 113593 | -1208 | 11581 | AN2170 |
| 331  | CONTIG34 | 116628 | 116907 | 2.56 | 0.00E+00 | transcription_start_site | - | 115658 | 115658 | -1109 | 11582 | AN2171 |
| 331  | CONTIG34 | 116628 | 116907 | 2.56 | 0.00E+00 | transcription_start_site | - | 115291 | 115291 | -1476 | 11583 | AN2171 |
| 1309 | CONTIG34 | 119643 | 119999 | 1.43 | 2.29E-02 | transcription_start_site | - | 115658 | 115658 | -4163 | 11582 | AN2171 |
| 1309 | CONTIG34 | 119643 | 119999 | 1.43 | 2.29E-02 | transcription_start_site | - | 115291 | 115291 | -4530 | 11583 | AN2171 |
| 1309 | CONTIG34 | 119643 | 119999 | 1.43 | 2.29E-02 | transcription_start_site | - | 119197 | 119197 | -624  | 11584 | AN2172 |
| 1309 | CONTIG34 | 119643 | 119999 | 1.43 | 2.29E-02 | transcription_start_site | - | 118964 | 118964 | -857  | 11585 | AN2172 |
| 331  | CONTIG34 | 116628 | 116907 | 2.56 | 0.00E+00 | transcription_start_site | + | 120005 | 120005 | -3237 | 11586 | AN2173 |

|      |          |        |        |      |          |                          |   |        |        |       |       |        |
|------|----------|--------|--------|------|----------|--------------------------|---|--------|--------|-------|-------|--------|
| 331  | CONTIG34 | 116628 | 116907 | 2.56 | 0.00E+00 | transcription_start_site | + | 120225 | 120225 | -3457 | 11587 | AN2173 |
| 331  | CONTIG34 | 116628 | 116907 | 2.56 | 0.00E+00 | transcription_start_site | + | 120396 | 120396 | -3628 | 11588 | AN2173 |
| 331  | CONTIG34 | 116628 | 116907 | 2.56 | 0.00E+00 | transcription_start_site | + | 120663 | 120663 | -3895 | 11589 | AN2173 |
| 331  | CONTIG34 | 116628 | 116907 | 2.56 | 0.00E+00 | transcription_start_site | + | 121314 | 121314 | -4546 | 11590 | AN2173 |
| 331  | CONTIG34 | 116628 | 116907 | 2.56 | 0.00E+00 | transcription_start_site | + | 121437 | 121437 | -4669 | 11591 | AN2173 |
| 331  | CONTIG34 | 116628 | 116907 | 2.56 | 0.00E+00 | transcription_start_site | + | 121594 | 121594 | -4826 | 11592 | AN2173 |
| 331  | CONTIG34 | 116628 | 116907 | 2.56 | 0.00E+00 | transcription_start_site | + | 121677 | 121677 | -4909 | 11593 | AN2173 |
| 1309 | CONTIG34 | 119643 | 119999 | 1.43 | 2.29E-02 | transcription_start_site | + | 120005 | 120005 | -184  | 11586 | AN2173 |
| 1309 | CONTIG34 | 119643 | 119999 | 1.43 | 2.29E-02 | transcription_start_site | + | 120225 | 120225 | -404  | 11587 | AN2173 |
| 1309 | CONTIG34 | 119643 | 119999 | 1.43 | 2.29E-02 | transcription_start_site | + | 120396 | 120396 | -575  | 11588 | AN2173 |
| 1309 | CONTIG34 | 119643 | 119999 | 1.43 | 2.29E-02 | transcription_start_site | + | 120663 | 120663 | -842  | 11589 | AN2173 |
| 1309 | CONTIG34 | 119643 | 119999 | 1.43 | 2.29E-02 | transcription_start_site | + | 121314 | 121314 | -1493 | 11590 | AN2173 |
| 1309 | CONTIG34 | 119643 | 119999 | 1.43 | 2.29E-02 | transcription_start_site | + | 121437 | 121437 | -1616 | 11591 | AN2173 |
| 1309 | CONTIG34 | 119643 | 119999 | 1.43 | 2.29E-02 | transcription_start_site | + | 121594 | 121594 | -1773 | 11592 | AN2173 |
| 1309 | CONTIG34 | 119643 | 119999 | 1.43 | 2.29E-02 | transcription_start_site | + | 121677 | 121677 | -1856 | 11593 | AN2173 |
| 182  | CONTIG34 | 134643 | 135067 | 2.87 | 0.00E+00 | transcription_start_site | + | 135894 | 135894 | -1039 | 11602 | AN2177 |
| 182  | CONTIG34 | 134643 | 135067 | 2.87 | 0.00E+00 | transcription_start_site | + | 136288 | 136288 | -1433 | 11603 | AN2177 |
| 2036 | CONTIG34 | 145126 | 145945 | 0.92 | 1.38E-01 | transcription_start_site | + | 146745 | 146745 | -1209 | 11604 | AN2180 |
| 2036 | CONTIG34 | 145126 | 145945 | 0.92 | 1.38E-01 | transcription_start_site | + | 147450 | 147450 | -1914 | 11605 | AN2180 |
| 2036 | CONTIG34 | 145126 | 145945 | 0.92 | 1.38E-01 | transcription_start_site | + | 149621 | 149621 | -4085 | 11606 | AN2181 |
| 2036 | CONTIG34 | 145126 | 145945 | 0.92 | 1.38E-01 | transcription_start_site | + | 149727 | 149727 | -4191 | 11607 | AN2181 |
| 2036 | CONTIG34 | 145126 | 145945 | 0.92 | 1.38E-01 | transcription_start_site | + | 149985 | 149985 | -4449 | 11608 | AN2181 |
| 2036 | CONTIG34 | 145126 | 145945 | 0.92 | 1.38E-01 | transcription_start_site | + | 150570 | 150570 | -5034 | 11609 | AN2182 |
| 2036 | CONTIG34 | 145126 | 145945 | 0.92 | 1.38E-01 | transcription_start_site | + | 150880 | 150880 | -5344 | 11610 | AN2182 |
| 1881 | CONTIG34 | 153086 | 154561 | 1.02 | 5.49E-02 | transcription_start_site | + | 154637 | 154637 | -813  | 11611 | AN2183 |
| 1881 | CONTIG34 | 153086 | 154561 | 1.02 | 5.49E-02 | transcription_start_site | + | 156347 | 156347 | -2523 | 11612 | AN2184 |
| 1881 | CONTIG34 | 153086 | 154561 | 1.02 | 5.49E-02 | transcription_start_site | + | 156970 | 156970 | -3146 | 11613 | AN2184 |
| 1881 | CONTIG34 | 153086 | 154561 | 1.02 | 5.49E-02 | transcription_start_site | + | 157267 | 157267 | -3443 | 11614 | AN2184 |
| 2279 | CONTIG35 | 47717  | 48051  | 0.7  | 1.54E-01 | transcription_start_site | + | 47745  | 47745  | 139   | 11692 | AN2207 |
| 2279 | CONTIG35 | 47717  | 48051  | 0.7  | 1.54E-01 | transcription_start_site | + | 46939  | 46939  | 945   | 11691 | AN2207 |
| 2279 | CONTIG35 | 47717  | 48051  | 0.7  | 1.54E-01 | transcription_start_site | + | 46843  | 46843  | 1041  | 11690 | AN2207 |
| 665  | CONTIG35 | 49357  | 49790  | 2.08 | 0.00E+00 | transcription_start_site | + | 49193  | 49193  | 380   | 11697 | AN2208 |
| 665  | CONTIG35 | 49357  | 49790  | 2.08 | 0.00E+00 | transcription_start_site | + | 49041  | 49041  | 532   | 11696 | AN2208 |
| 665  | CONTIG35 | 49357  | 49790  | 2.08 | 0.00E+00 | transcription_start_site | + | 48578  | 48578  | 995   | 11695 | AN2208 |
| 665  | CONTIG35 | 49357  | 49790  | 2.08 | 0.00E+00 | transcription_start_site | + | 48430  | 48430  | 1143  | 11694 | AN2208 |
| 2279 | CONTIG35 | 47717  | 48051  | 0.7  | 1.54E-01 | transcription_start_site | + | 48056  | 48056  | -172  | 11693 | AN2208 |
| 2279 | CONTIG35 | 47717  | 48051  | 0.7  | 1.54E-01 | transcription_start_site | + | 48430  | 48430  | -546  | 11694 | AN2208 |
| 2279 | CONTIG35 | 47717  | 48051  | 0.7  | 1.54E-01 | transcription_start_site | + | 48578  | 48578  | -694  | 11695 | AN2208 |
| 2279 | CONTIG35 | 47717  | 48051  | 0.7  | 1.54E-01 | transcription_start_site | + | 49041  | 49041  | -1157 | 11696 | AN2208 |
| 2279 | CONTIG35 | 47717  | 48051  | 0.7  | 1.54E-01 | transcription_start_site | + | 49193  | 49193  | -1309 | 11697 | AN2208 |
| 665  | CONTIG35 | 49357  | 49790  | 2.08 | 0.00E+00 | transcription_start_site | + | 50405  | 50405  | -831  | 11698 | AN2209 |
| 665  | CONTIG35 | 49357  | 49790  | 2.08 | 0.00E+00 | transcription_start_site | + | 50791  | 50791  | -1217 | 11699 | AN2209 |
| 1272 | CONTIG35 | 51376  | 51957  | 1.46 | 0.00E+00 | transcription_start_site | + | 50791  | 50791  | 875   | 11699 | AN2209 |
| 1272 | CONTIG35 | 51376  | 51957  | 1.46 | 0.00E+00 | transcription_start_site | + | 50405  | 50405  | 1261  | 11698 | AN2209 |
| 2279 | CONTIG35 | 47717  | 48051  | 0.7  | 1.54E-01 | transcription_start_site | + | 50405  | 50405  | -2521 | 11698 | AN2209 |
| 2279 | CONTIG35 | 47717  | 48051  | 0.7  | 1.54E-01 | transcription_start_site | + | 50791  | 50791  | -2907 | 11699 | AN2209 |
| 665  | CONTIG35 | 49357  | 49790  | 2.08 | 0.00E+00 | transcription_start_site | + | 52026  | 52026  | -2452 | 11700 | AN2210 |
| 665  | CONTIG35 | 49357  | 49790  | 2.08 | 0.00E+00 | transcription_start_site | + | 52638  | 52638  | -3064 | 11701 | AN2210 |
| 1272 | CONTIG35 | 51376  | 51957  | 1.46 | 0.00E+00 | transcription_start_site | + | 52026  | 52026  | -359  | 11700 | AN2210 |
| 1272 | CONTIG35 | 51376  | 51957  | 1.46 | 0.00E+00 | transcription_start_site | + | 52638  | 52638  | -971  | 11701 | AN2210 |
| 2279 | CONTIG35 | 47717  | 48051  | 0.7  | 1.54E-01 | transcription_start_site | + | 52026  | 52026  | -4142 | 11700 | AN2210 |
| 2279 | CONTIG35 | 47717  | 48051  | 0.7  | 1.54E-01 | transcription_start_site | + | 52638  | 52638  | -4754 | 11701 | AN2210 |
| 2256 | CONTIG35 | 68565  | 68979  | 0.73 | 1.38E-01 | transcription_start_site | - | 68034  | 68034  | -738  | 11712 | AN2215 |
| 2256 | CONTIG35 | 68565  | 68979  | 0.73 | 1.38E-01 | transcription_start_site | - | 67532  | 67532  | -1240 | 11713 | AN2215 |
| 2256 | CONTIG35 | 68565  | 68979  | 0.73 | 1.38E-01 | transcription_start_site | - | 66780  | 66780  | -1992 | 11714 | AN2215 |
| 2256 | CONTIG35 | 68565  | 68979  | 0.73 | 1.38E-01 | transcription_start_site | - | 64875  | 64875  | -3897 | 11715 | AN2215 |
| 2256 | CONTIG35 | 68565  | 68979  | 0.73 | 1.38E-01 | transcription_start_site | + | 68737  | 68737  | 35    | 11716 | AN2216 |

|      |          |       |       |      |          |                          |   |       |       |       |       |        |
|------|----------|-------|-------|------|----------|--------------------------|---|-------|-------|-------|-------|--------|
| 2256 | CONTIG35 | 68565 | 68979 | 0.73 | 1.38E-01 | transcription_start_site | + | 68819 | 68819 | -47   | 11717 | AN2216 |
| 2256 | CONTIG35 | 68565 | 68979 | 0.73 | 1.38E-01 | transcription_start_site | + | 69039 | 69039 | -267  | 11718 | AN2216 |
| 1396 | CONTIG35 | 83645 | 83904 | 1.35 | 9.32E-03 | transcription_start_site | - | 80255 | 80255 | -3519 | 11731 | AN2219 |
| 1396 | CONTIG35 | 83645 | 83904 | 1.35 | 9.32E-03 | transcription_start_site | - | 79532 | 79532 | -4242 | 11732 | AN2219 |
| 1396 | CONTIG35 | 83645 | 83904 | 1.35 | 9.32E-03 | transcription_start_site | - | 79077 | 79077 | -4697 | 11733 | AN2219 |
| 1396 | CONTIG35 | 83645 | 83904 | 1.35 | 9.32E-03 | transcription_start_site | - | 78934 | 78934 | -4840 | 11734 | AN2219 |
| 1823 | CONTIG36 | 25655 | 25929 | 1.06 | 1.38E-01 | transcription_start_site | - | 23711 | 23711 | -2081 | 11756 | AN2228 |
| 1823 | CONTIG36 | 25655 | 25929 | 1.06 | 1.38E-01 | transcription_start_site | - | 23595 | 23595 | -2197 | 11757 | AN2228 |
| 1823 | CONTIG36 | 25655 | 25929 | 1.06 | 1.38E-01 | transcription_start_site | - | 26282 | 26282 | 490   | 11760 | AN2229 |
| 1823 | CONTIG36 | 25655 | 25929 | 1.06 | 1.38E-01 | transcription_start_site | - | 26723 | 26723 | 931   | 11759 | AN2229 |
| 1823 | CONTIG36 | 25655 | 25929 | 1.06 | 1.38E-01 | transcription_start_site | - | 26820 | 26820 | 1028  | 11758 | AN2229 |
| 1823 | CONTIG36 | 25655 | 25929 | 1.06 | 1.38E-01 | transcription_start_site | + | 29918 | 29918 | -4126 | 11765 | AN2231 |
| 51   | CONTIG36 | 42902 | 43266 | 3.23 | 0.00E+00 | transcription_start_site | + | 43506 | 43506 | -422  | 11779 | AN2236 |
| 1758 | CONTIG36 | 44117 | 44676 | 1.1  | 1.22E-01 | transcription_start_site | + | 43506 | 43506 | 890   | 11779 | AN2236 |
| 51   | CONTIG36 | 42902 | 43266 | 3.23 | 0.00E+00 | transcription_start_site | + | 46265 | 46265 | -3181 | 11780 | AN2237 |
| 51   | CONTIG36 | 42902 | 43266 | 3.23 | 0.00E+00 | transcription_start_site | + | 46534 | 46534 | -3450 | 11781 | AN2237 |
| 163  | CONTIG36 | 45770 | 46045 | 2.91 | 0.00E+00 | transcription_start_site | + | 46265 | 46265 | -357  | 11780 | AN2237 |
| 163  | CONTIG36 | 45770 | 46045 | 2.91 | 0.00E+00 | transcription_start_site | + | 46534 | 46534 | -626  | 11781 | AN2237 |
| 1758 | CONTIG36 | 44117 | 44676 | 1.1  | 1.22E-01 | transcription_start_site | + | 46265 | 46265 | -1868 | 11780 | AN2237 |
| 1758 | CONTIG36 | 44117 | 44676 | 1.1  | 1.22E-01 | transcription_start_site | + | 46534 | 46534 | -2137 | 11781 | AN2237 |
| 163  | CONTIG36 | 45770 | 46045 | 2.91 | 0.00E+00 | transcription_start_site | + | 48993 | 48993 | -3085 | 11782 | AN2238 |
| 163  | CONTIG36 | 45770 | 46045 | 2.91 | 0.00E+00 | transcription_start_site | + | 49200 | 49200 | -3292 | 11783 | AN2238 |
| 163  | CONTIG36 | 45770 | 46045 | 2.91 | 0.00E+00 | transcription_start_site | + | 49961 | 49961 | -4053 | 11784 | AN2238 |
| 1758 | CONTIG36 | 44117 | 44676 | 1.1  | 1.22E-01 | transcription_start_site | + | 48993 | 48993 | -4596 | 11782 | AN2238 |
| 1758 | CONTIG36 | 44117 | 44676 | 1.1  | 1.22E-01 | transcription_start_site | + | 49200 | 49200 | -4803 | 11783 | AN2238 |
| 990  | CONTIG36 | 85143 | 85482 | 1.73 | 1.80E-02 | transcription_start_site | - | 81072 | 81072 | -4240 | 11815 | AN2248 |
| 990  | CONTIG36 | 85143 | 85482 | 1.73 | 1.80E-02 | transcription_start_site | - | 80760 | 80760 | -4552 | 11816 | AN2248 |
| 990  | CONTIG36 | 85143 | 85482 | 1.73 | 1.80E-02 | transcription_start_site | - | 80661 | 80661 | -4651 | 11817 | AN2248 |
| 1066 | CONTIG36 | 84393 | 85109 | 1.65 | 1.06E-02 | transcription_start_site | - | 81072 | 81072 | -3679 | 11815 | AN2248 |
| 1066 | CONTIG36 | 84393 | 85109 | 1.65 | 1.06E-02 | transcription_start_site | - | 80760 | 80760 | -3991 | 11816 | AN2248 |
| 1066 | CONTIG36 | 84393 | 85109 | 1.65 | 1.06E-02 | transcription_start_site | - | 80661 | 80661 | -4090 | 11817 | AN2248 |
| 1066 | CONTIG36 | 84393 | 85109 | 1.65 | 1.06E-02 | transcription_start_site | - | 79448 | 79448 | -5303 | 11818 | AN2248 |
| 990  | CONTIG36 | 85143 | 85482 | 1.73 | 1.80E-02 | transcription_start_site | - | 83560 | 83560 | -1752 | 11819 | AN2249 |
| 990  | CONTIG36 | 85143 | 85482 | 1.73 | 1.80E-02 | transcription_start_site | - | 83306 | 83306 | -2006 | 11820 | AN2249 |
| 990  | CONTIG36 | 85143 | 85482 | 1.73 | 1.80E-02 | transcription_start_site | - | 82951 | 82951 | -2361 | 11821 | AN2249 |
| 990  | CONTIG36 | 85143 | 85482 | 1.73 | 1.80E-02 | transcription_start_site | - | 82578 | 82578 | -2734 | 11822 | AN2249 |
| 990  | CONTIG36 | 85143 | 85482 | 1.73 | 1.80E-02 | transcription_start_site | - | 82014 | 82014 | -3298 | 11823 | AN2249 |
| 1066 | CONTIG36 | 84393 | 85109 | 1.65 | 1.06E-02 | transcription_start_site | - | 83560 | 83560 | -1191 | 11819 | AN2249 |
| 1066 | CONTIG36 | 84393 | 85109 | 1.65 | 1.06E-02 | transcription_start_site | - | 83306 | 83306 | -1445 | 11820 | AN2249 |
| 1066 | CONTIG36 | 84393 | 85109 | 1.65 | 1.06E-02 | transcription_start_site | - | 82951 | 82951 | -1800 | 11821 | AN2249 |
| 1066 | CONTIG36 | 84393 | 85109 | 1.65 | 1.06E-02 | transcription_start_site | - | 82578 | 82578 | -2173 | 11822 | AN2249 |
| 1066 | CONTIG36 | 84393 | 85109 | 1.65 | 1.06E-02 | transcription_start_site | - | 82014 | 82014 | -2737 | 11823 | AN2249 |
| 1523 | CONTIG36 | 88958 | 89382 | 1.26 | 7.66E-02 | transcription_start_site | - | 87155 | 87155 | -2015 | 11824 | AN2250 |
| 1523 | CONTIG36 | 88958 | 89382 | 1.26 | 7.66E-02 | transcription_start_site | - | 86830 | 86830 | -2340 | 11825 | AN2250 |
| 1523 | CONTIG36 | 88958 | 89382 | 1.26 | 7.66E-02 | transcription_start_site | - | 86588 | 86588 | -2582 | 11826 | AN2250 |
| 990  | CONTIG36 | 85143 | 85482 | 1.73 | 1.80E-02 | transcription_start_site | + | 89582 | 89582 | -4269 | 11827 | AN2251 |
| 990  | CONTIG36 | 85143 | 85482 | 1.73 | 1.80E-02 | transcription_start_site | + | 89903 | 89903 | -4590 | 11828 | AN2251 |
| 990  | CONTIG36 | 85143 | 85482 | 1.73 | 1.80E-02 | transcription_start_site | + | 90100 | 90100 | -4787 | 11829 | AN2251 |
| 990  | CONTIG36 | 85143 | 85482 | 1.73 | 1.80E-02 | transcription_start_site | + | 90238 | 90238 | -4925 | 11830 | AN2251 |
| 990  | CONTIG36 | 85143 | 85482 | 1.73 | 1.80E-02 | transcription_start_site | + | 90413 | 90413 | -5100 | 11831 | AN2251 |
| 1066 | CONTIG36 | 84393 | 85109 | 1.65 | 1.06E-02 | transcription_start_site | + | 89582 | 89582 | -4831 | 11827 | AN2251 |
| 1066 | CONTIG36 | 84393 | 85109 | 1.65 | 1.06E-02 | transcription_start_site | + | 89903 | 89903 | -5152 | 11828 | AN2251 |
| 1066 | CONTIG36 | 84393 | 85109 | 1.65 | 1.06E-02 | transcription_start_site | + | 90100 | 90100 | -5349 | 11829 | AN2251 |
| 1523 | CONTIG36 | 88958 | 89382 | 1.26 | 7.66E-02 | transcription_start_site | + | 89582 | 89582 | -412  | 11827 | AN2251 |
| 1523 | CONTIG36 | 88958 | 89382 | 1.26 | 7.66E-02 | transcription_start_site | + | 89903 | 89903 | -733  | 11828 | AN2251 |
| 1523 | CONTIG36 | 88958 | 89382 | 1.26 | 7.66E-02 | transcription_start_site | + | 90100 | 90100 | -930  | 11829 | AN2251 |
| 1523 | CONTIG36 | 88958 | 89382 | 1.26 | 7.66E-02 | transcription_start_site | + | 90238 | 90238 | -1068 | 11830 | AN2251 |

|      |          |       |       |      |          |                          |   |       |       |       |       |        |
|------|----------|-------|-------|------|----------|--------------------------|---|-------|-------|-------|-------|--------|
| 1523 | CONTIG36 | 88958 | 89382 | 1.26 | 7.66E-02 | transcription_start_site | + | 90413 | 90413 | -1243 | 11831 | AN2251 |
| 1523 | CONTIG36 | 88958 | 89382 | 1.26 | 7.66E-02 | transcription_start_site | + | 90812 | 90812 | -1642 | 11832 | AN2251 |
| 1523 | CONTIG36 | 88958 | 89382 | 1.26 | 7.66E-02 | transcription_start_site | + | 94106 | 94106 | -4936 | 11838 | AN2254 |
| 1523 | CONTIG36 | 88958 | 89382 | 1.26 | 7.66E-02 | transcription_start_site | + | 94174 | 94174 | -5004 | 11839 | AN2254 |
| 31   | CONTIG37 | 37877 | 38761 | 3.35 | 0.00E+00 | transcription_start_site | - | 33205 | 33205 | -5114 | 11867 | AN2264 |
| 31   | CONTIG37 | 37877 | 38761 | 3.35 | 0.00E+00 | transcription_start_site | - | 36317 | 36317 | -2002 | 11875 | AN2265 |
| 737  | CONTIG37 | 53567 | 53916 | 2.01 | 7.70E-03 | transcription_start_site | - | 52776 | 52776 | -965  | 11887 | AN2269 |
| 737  | CONTIG37 | 53567 | 53916 | 2.01 | 7.70E-03 | transcription_start_site | - | 52543 | 52543 | -1198 | 11888 | AN2269 |
| 737  | CONTIG37 | 53567 | 53916 | 2.01 | 7.70E-03 | transcription_start_site | - | 52416 | 52416 | -1325 | 11889 | AN2269 |
| 737  | CONTIG37 | 53567 | 53916 | 2.01 | 7.70E-03 | transcription_start_site | - | 52215 | 52215 | -1526 | 11890 | AN2269 |
| 737  | CONTIG37 | 53567 | 53916 | 2.01 | 7.70E-03 | transcription_start_site | + | 55075 | 55075 | -1333 | 11891 | AN2270 |
| 737  | CONTIG37 | 53567 | 53916 | 2.01 | 7.70E-03 | transcription_start_site | + | 55274 | 55274 | -1532 | 11892 | AN2270 |
| 737  | CONTIG37 | 53567 | 53916 | 2.01 | 7.70E-03 | transcription_start_site | + | 55398 | 55398 | -1656 | 11893 | AN2270 |
| 1138 | CONTIG37 | 73508 | 73782 | 1.58 | 3.01E-02 | transcription_start_site | - | 68933 | 68933 | -4712 | 11911 | AN2274 |
| 1138 | CONTIG37 | 73508 | 73782 | 1.58 | 3.01E-02 | transcription_start_site | - | 68623 | 68623 | -5022 | 11912 | AN2274 |
| 1138 | CONTIG37 | 73508 | 73782 | 1.58 | 3.01E-02 | transcription_start_site | + | 74426 | 74426 | -781  | 11921 | AN2277 |
| 1138 | CONTIG37 | 73508 | 73782 | 1.58 | 3.01E-02 | transcription_start_site | + | 74616 | 74616 | -971  | 11922 | AN2277 |
| 1138 | CONTIG37 | 73508 | 73782 | 1.58 | 3.01E-02 | transcription_start_site | + | 74840 | 74840 | -1195 | 11923 | AN2277 |
| 1138 | CONTIG37 | 73508 | 73782 | 1.58 | 3.01E-02 | transcription_start_site | + | 75011 | 75011 | -1366 | 11924 | AN2277 |
| 1353 | CONTIG38 | 12832 | 13192 | 1.39 | 1.80E-02 | transcription_start_site | - | 9640  | 9640  | -3372 | 11935 | AN2280 |
| 1353 | CONTIG38 | 12832 | 13192 | 1.39 | 1.80E-02 | transcription_start_site | - | 9483  | 9483  | -3529 | 11936 | AN2280 |
| 1353 | CONTIG38 | 12832 | 13192 | 1.39 | 1.80E-02 | transcription_start_site | - | 9091  | 9091  | -3921 | 11937 | AN2280 |
| 1690 | CONTIG38 | 9917  | 10486 | 1.14 | 4.78E-02 | transcription_start_site | - | 9640  | 9640  | -561  | 11935 | AN2280 |
| 1690 | CONTIG38 | 9917  | 10486 | 1.14 | 4.78E-02 | transcription_start_site | - | 9483  | 9483  | -718  | 11936 | AN2280 |
| 1690 | CONTIG38 | 9917  | 10486 | 1.14 | 4.78E-02 | transcription_start_site | - | 9091  | 9091  | -1110 | 11937 | AN2280 |
| 1851 | CONTIG38 | 13427 | 13851 | 1.04 | 6.74E-02 | transcription_start_site | - | 9640  | 9640  | -3999 | 11935 | AN2280 |
| 1851 | CONTIG38 | 13427 | 13851 | 1.04 | 6.74E-02 | transcription_start_site | - | 9483  | 9483  | -4156 | 11936 | AN2280 |
| 1851 | CONTIG38 | 13427 | 13851 | 1.04 | 6.74E-02 | transcription_start_site | - | 9091  | 9091  | -4548 | 11937 | AN2280 |
| 1690 | CONTIG38 | 9917  | 10486 | 1.14 | 4.78E-02 | transcription_start_site | + | 10587 | 10587 | -385  | 11938 | AN2281 |
| 1690 | CONTIG38 | 9917  | 10486 | 1.14 | 4.78E-02 | transcription_start_site | + | 10822 | 10822 | -620  | 11939 | AN2281 |
| 1690 | CONTIG38 | 9917  | 10486 | 1.14 | 4.78E-02 | transcription_start_site | + | 11301 | 11301 | -1099 | 11940 | AN2281 |
| 1690 | CONTIG38 | 9917  | 10486 | 1.14 | 4.78E-02 | transcription_start_site | + | 11755 | 11755 | -1553 | 11941 | AN2281 |
| 1353 | CONTIG38 | 12832 | 13192 | 1.39 | 1.80E-02 | transcription_start_site | + | 13477 | 13477 | -465  | 11942 | AN2282 |
| 1353 | CONTIG38 | 12832 | 13192 | 1.39 | 1.80E-02 | transcription_start_site | + | 13539 | 13539 | -527  | 11943 | AN2282 |
| 1353 | CONTIG38 | 12832 | 13192 | 1.39 | 1.80E-02 | transcription_start_site | + | 13804 | 13804 | -792  | 11944 | AN2282 |
| 1353 | CONTIG38 | 12832 | 13192 | 1.39 | 1.80E-02 | transcription_start_site | + | 14016 | 14016 | -1004 | 11945 | AN2282 |
| 1353 | CONTIG38 | 12832 | 13192 | 1.39 | 1.80E-02 | transcription_start_site | + | 14161 | 14161 | -1149 | 11946 | AN2282 |
| 1353 | CONTIG38 | 12832 | 13192 | 1.39 | 1.80E-02 | transcription_start_site | + | 14245 | 14245 | -1233 | 11947 | AN2282 |
| 1353 | CONTIG38 | 12832 | 13192 | 1.39 | 1.80E-02 | transcription_start_site | + | 14660 | 14660 | -1648 | 11948 | AN2282 |
| 1353 | CONTIG38 | 12832 | 13192 | 1.39 | 1.80E-02 | transcription_start_site | + | 14772 | 14772 | -1760 | 11949 | AN2282 |
| 1353 | CONTIG38 | 12832 | 13192 | 1.39 | 1.80E-02 | transcription_start_site | + | 14870 | 14870 | -1858 | 11950 | AN2282 |
| 1353 | CONTIG38 | 12832 | 13192 | 1.39 | 1.80E-02 | transcription_start_site | + | 15237 | 15237 | -2225 | 11951 | AN2282 |
| 1690 | CONTIG38 | 9917  | 10486 | 1.14 | 4.78E-02 | transcription_start_site | + | 13477 | 13477 | -3275 | 11942 | AN2282 |
| 1690 | CONTIG38 | 9917  | 10486 | 1.14 | 4.78E-02 | transcription_start_site | + | 13539 | 13539 | -3337 | 11943 | AN2282 |
| 1690 | CONTIG38 | 9917  | 10486 | 1.14 | 4.78E-02 | transcription_start_site | + | 13804 | 13804 | -3602 | 11944 | AN2282 |
| 1690 | CONTIG38 | 9917  | 10486 | 1.14 | 4.78E-02 | transcription_start_site | + | 14016 | 14016 | -3814 | 11945 | AN2282 |
| 1690 | CONTIG38 | 9917  | 10486 | 1.14 | 4.78E-02 | transcription_start_site | + | 14161 | 14161 | -3959 | 11946 | AN2282 |
| 1690 | CONTIG38 | 9917  | 10486 | 1.14 | 4.78E-02 | transcription_start_site | + | 14245 | 14245 | -4043 | 11947 | AN2282 |
| 1690 | CONTIG38 | 9917  | 10486 | 1.14 | 4.78E-02 | transcription_start_site | + | 14660 | 14660 | -4458 | 11948 | AN2282 |
| 1690 | CONTIG38 | 9917  | 10486 | 1.14 | 4.78E-02 | transcription_start_site | + | 14772 | 14772 | -4570 | 11949 | AN2282 |
| 1690 | CONTIG38 | 9917  | 10486 | 1.14 | 4.78E-02 | transcription_start_site | + | 14870 | 14870 | -4668 | 11950 | AN2282 |
| 1690 | CONTIG38 | 9917  | 10486 | 1.14 | 4.78E-02 | transcription_start_site | + | 15237 | 15237 | -5035 | 11951 | AN2282 |
| 1851 | CONTIG38 | 13427 | 13851 | 1.04 | 6.74E-02 | transcription_start_site | + | 13539 | 13539 | 100   | 11943 | AN2282 |
| 1851 | CONTIG38 | 13427 | 13851 | 1.04 | 6.74E-02 | transcription_start_site | + | 13477 | 13477 | 162   | 11942 | AN2282 |
| 1851 | CONTIG38 | 13427 | 13851 | 1.04 | 6.74E-02 | transcription_start_site | + | 13804 | 13804 | -165  | 11944 | AN2282 |
| 1851 | CONTIG38 | 13427 | 13851 | 1.04 | 6.74E-02 | transcription_start_site | + | 14016 | 14016 | -377  | 11945 | AN2282 |
| 1851 | CONTIG38 | 13427 | 13851 | 1.04 | 6.74E-02 | transcription_start_site | + | 14161 | 14161 | -522  | 11946 | AN2282 |

|      |          |        |        |      |          |                          |   |        |        |       |       |        |
|------|----------|--------|--------|------|----------|--------------------------|---|--------|--------|-------|-------|--------|
| 1851 | CONTIG38 | 13427  | 13851  | 1.04 | 6.74E-02 | transcription_start_site | + | 14245  | 14245  | -606  | 11947 | AN2282 |
| 1851 | CONTIG38 | 13427  | 13851  | 1.04 | 6.74E-02 | transcription_start_site | + | 14660  | 14660  | -1021 | 11948 | AN2282 |
| 1851 | CONTIG38 | 13427  | 13851  | 1.04 | 6.74E-02 | transcription_start_site | + | 14772  | 14772  | -1133 | 11949 | AN2282 |
| 1851 | CONTIG38 | 13427  | 13851  | 1.04 | 6.74E-02 | transcription_start_site | + | 14870  | 14870  | -1231 | 11950 | AN2282 |
| 1851 | CONTIG38 | 13427  | 13851  | 1.04 | 6.74E-02 | transcription_start_site | + | 15237  | 15237  | -1598 | 11951 | AN2282 |
| 1353 | CONTIG38 | 12832  | 13192  | 1.39 | 1.80E-02 | transcription_start_site | + | 16791  | 16791  | -3779 | 11952 | AN2283 |
| 1353 | CONTIG38 | 12832  | 13192  | 1.39 | 1.80E-02 | transcription_start_site | + | 17007  | 17007  | -3995 | 11953 | AN2283 |
| 1353 | CONTIG38 | 12832  | 13192  | 1.39 | 1.80E-02 | transcription_start_site | + | 17399  | 17399  | -4387 | 11954 | AN2283 |
| 1851 | CONTIG38 | 13427  | 13851  | 1.04 | 6.74E-02 | transcription_start_site | + | 16791  | 16791  | -3152 | 11952 | AN2283 |
| 1851 | CONTIG38 | 13427  | 13851  | 1.04 | 6.74E-02 | transcription_start_site | + | 17007  | 17007  | -3368 | 11953 | AN2283 |
| 1851 | CONTIG38 | 13427  | 13851  | 1.04 | 6.74E-02 | transcription_start_site | + | 17399  | 17399  | -3760 | 11954 | AN2283 |
| 1201 | CONTIG38 | 21077  | 21351  | 1.52 | 1.06E-02 | transcription_start_site | - | 20852  | 20852  | -362  | 11955 | AN2284 |
| 1201 | CONTIG38 | 21077  | 21351  | 1.52 | 1.06E-02 | transcription_start_site | - | 20433  | 20433  | -781  | 11956 | AN2284 |
| 1201 | CONTIG38 | 21077  | 21351  | 1.52 | 1.06E-02 | transcription_start_site | - | 22027  | 22027  | 813   | 11961 | AN2285 |
| 1243 | CONTIG38 | 30461  | 30746  | 1.49 | 1.25E-02 | transcription_start_site | - | 27019  | 27019  | -3584 | 11957 | AN2285 |
| 1243 | CONTIG38 | 30461  | 30746  | 1.49 | 1.25E-02 | transcription_start_site | - | 26416  | 26416  | -4187 | 11958 | AN2285 |
| 1243 | CONTIG38 | 30461  | 30746  | 1.49 | 1.25E-02 | transcription_start_site | - | 25855  | 25855  | -4748 | 11959 | AN2285 |
| 1243 | CONTIG38 | 30461  | 30746  | 1.49 | 1.25E-02 | transcription_start_site | - | 30070  | 30070  | -533  | 11962 | AN2286 |
| 1243 | CONTIG38 | 30461  | 30746  | 1.49 | 1.25E-02 | transcription_start_site | - | 29340  | 29340  | -1263 | 11963 | AN2286 |
| 1243 | CONTIG38 | 30461  | 30746  | 1.49 | 1.25E-02 | transcription_start_site | - | 28917  | 28917  | -1686 | 11964 | AN2286 |
| 1243 | CONTIG38 | 30461  | 30746  | 1.49 | 1.25E-02 | transcription_start_site | - | 31025  | 31025  | 421   | 11974 | AN2287 |
| 1243 | CONTIG38 | 30461  | 30746  | 1.49 | 1.25E-02 | transcription_start_site | - | 31399  | 31399  | 795   | 11973 | AN2287 |
| 926  | CONTIG38 | 43060  | 44394  | 1.8  | 3.37E-03 | transcription_start_site | - | 39015  | 39015  | -4712 | 11980 | AN2289 |
| 926  | CONTIG38 | 43060  | 44394  | 1.8  | 3.37E-03 | transcription_start_site | - | 38747  | 38747  | -4980 | 11981 | AN2289 |
| 926  | CONTIG38 | 43060  | 44394  | 1.8  | 3.37E-03 | transcription_start_site | - | 38654  | 38654  | -5073 | 11982 | AN2289 |
| 926  | CONTIG38 | 43060  | 44394  | 1.8  | 3.37E-03 | transcription_start_site | - | 38283  | 38283  | -5444 | 11983 | AN2289 |
| 926  | CONTIG38 | 43060  | 44394  | 1.8  | 3.37E-03 | transcription_start_site | - | 42443  | 42443  | -1284 | 11984 | AN2290 |
| 926  | CONTIG38 | 43060  | 44394  | 1.8  | 3.37E-03 | transcription_start_site | - | 42268  | 42268  | -1459 | 11985 | AN2290 |
| 926  | CONTIG38 | 43060  | 44394  | 1.8  | 3.37E-03 | transcription_start_site | - | 42111  | 42111  | -1616 | 11986 | AN2290 |
| 926  | CONTIG38 | 43060  | 44394  | 1.8  | 3.37E-03 | transcription_start_site | - | 40485  | 40485  | -3242 | 11987 | AN2290 |
| 926  | CONTIG38 | 43060  | 44394  | 1.8  | 3.37E-03 | transcription_start_site | - | 40347  | 40347  | -3380 | 11988 | AN2290 |
| 600  | CONTIG38 | 75077  | 75433  | 2.18 | 2.51E-04 | transcription_start_site | - | 74196  | 74196  | -1059 | 12018 | AN2300 |
| 600  | CONTIG38 | 75077  | 75433  | 2.18 | 2.51E-04 | transcription_start_site | - | 73721  | 73721  | -1534 | 12019 | AN2300 |
| 600  | CONTIG38 | 75077  | 75433  | 2.18 | 2.51E-04 | transcription_start_site | - | 70399  | 70399  | -4856 | 12020 | AN2300 |
| 600  | CONTIG38 | 75077  | 75433  | 2.18 | 2.51E-04 | transcription_start_site | + | 77018  | 77018  | -1763 | 12021 | AN2301 |
| 600  | CONTIG38 | 75077  | 75433  | 2.18 | 2.51E-04 | transcription_start_site | + | 77160  | 77160  | -1905 | 12022 | AN2301 |
| 600  | CONTIG38 | 75077  | 75433  | 2.18 | 2.51E-04 | transcription_start_site | + | 77529  | 77529  | -2274 | 12023 | AN2301 |
| 245  | CONTIG38 | 102467 | 102806 | 2.72 | 0.00E+00 | transcription_start_site | + | 103767 | 103767 | -1130 | 12058 | AN2311 |
| 245  | CONTIG38 | 102467 | 102806 | 2.72 | 0.00E+00 | transcription_start_site | + | 104118 | 104118 | -1481 | 12059 | AN2311 |
| 245  | CONTIG38 | 102467 | 102806 | 2.72 | 0.00E+00 | transcription_start_site | + | 105504 | 105504 | -2867 | 12060 | AN2311 |
| 245  | CONTIG38 | 102467 | 102806 | 2.72 | 0.00E+00 | transcription_start_site | + | 107128 | 107128 | -4491 | 12061 | AN2312 |
| 245  | CONTIG38 | 102467 | 102806 | 2.72 | 0.00E+00 | transcription_start_site | + | 107235 | 107235 | -4598 | 12062 | AN2312 |
| 2200 | CONTIG38 | 106969 | 108068 | 0.79 | 5.91E-02 | transcription_start_site | + | 107235 | 107235 | 283   | 12062 | AN2312 |
| 2200 | CONTIG38 | 106969 | 108068 | 0.79 | 5.91E-02 | transcription_start_site | + | 107128 | 107128 | 390   | 12061 | AN2312 |
| 2200 | CONTIG38 | 106969 | 108068 | 0.79 | 5.91E-02 | transcription_start_site | + | 108080 | 108080 | -561  | 12063 | AN2313 |
| 2200 | CONTIG38 | 106969 | 108068 | 0.79 | 5.91E-02 | transcription_start_site | + | 108683 | 108683 | -1164 | 12064 | AN2313 |
| 2200 | CONTIG38 | 106969 | 108068 | 0.79 | 5.91E-02 | transcription_start_site | + | 112430 | 112430 | -4911 | 12065 | AN2314 |
| 2200 | CONTIG38 | 106969 | 108068 | 0.79 | 5.91E-02 | transcription_start_site | + | 112516 | 112516 | -4997 | 12066 | AN2314 |
| 2200 | CONTIG38 | 106969 | 108068 | 0.79 | 5.91E-02 | transcription_start_site | + | 112736 | 112736 | -5217 | 12067 | AN2314 |
| 2200 | CONTIG38 | 106969 | 108068 | 0.79 | 5.91E-02 | transcription_start_site | + | 112901 | 112901 | -5382 | 12068 | AN2314 |
| 1240 | CONTIG38 | 117920 | 118636 | 1.49 | 4.92E-03 | transcription_start_site | - | 117681 | 117681 | -597  | 12073 | AN2315 |
| 1240 | CONTIG38 | 117920 | 118636 | 1.49 | 4.92E-03 | transcription_start_site | - | 117599 | 117599 | -679  | 12074 | AN2315 |
| 1240 | CONTIG38 | 117920 | 118636 | 1.49 | 4.92E-03 | transcription_start_site | - | 117290 | 117290 | -988  | 12075 | AN2315 |
| 1240 | CONTIG38 | 117920 | 118636 | 1.49 | 4.92E-03 | transcription_start_site | - | 117140 | 117140 | -1138 | 12076 | AN2315 |
| 1240 | CONTIG38 | 117920 | 118636 | 1.49 | 4.92E-03 | transcription_start_site | - | 117018 | 117018 | -1260 | 12077 | AN2315 |
| 1240 | CONTIG38 | 117920 | 118636 | 1.49 | 4.92E-03 | transcription_start_site | - | 116651 | 116651 | -1627 | 12078 | AN2315 |
| 1240 | CONTIG38 | 117920 | 118636 | 1.49 | 4.92E-03 | transcription_start_site | - | 115747 | 115747 | -2531 | 12079 | AN2315 |

|      |          |        |        |      |          |                          |   |        |        |       |       |        |
|------|----------|--------|--------|------|----------|--------------------------|---|--------|--------|-------|-------|--------|
| 1240 | CONTIG38 | 117920 | 118636 | 1.49 | 4.92E-03 | transcription_start_site | - | 118968 | 118968 | 690   | 12082 | AN2316 |
| 1240 | CONTIG38 | 117920 | 118636 | 1.49 | 4.92E-03 | transcription_start_site | - | 119254 | 119254 | 976   | 12081 | AN2316 |
| 1552 | CONTIG38 | 168920 | 169255 | 1.23 | 3.34E-02 | transcription_start_site | - | 167229 | 167229 | -1858 | 12127 | AN2331 |
| 1552 | CONTIG38 | 168920 | 169255 | 1.23 | 3.34E-02 | transcription_start_site | - | 166959 | 166959 | -2128 | 12128 | AN2331 |
| 1552 | CONTIG38 | 168920 | 169255 | 1.23 | 3.34E-02 | transcription_start_site | - | 166618 | 166618 | -2469 | 12129 | AN2331 |
| 1552 | CONTIG38 | 168920 | 169255 | 1.23 | 3.34E-02 | transcription_start_site | - | 166481 | 166481 | -2606 | 12130 | AN2331 |
| 1552 | CONTIG38 | 168920 | 169255 | 1.23 | 3.34E-02 | transcription_start_site | - | 166154 | 166154 | -2933 | 12131 | AN2331 |
| 1552 | CONTIG38 | 168920 | 169255 | 1.23 | 3.34E-02 | transcription_start_site | + | 169244 | 169244 | -156  | 12132 | AN2332 |
| 1552 | CONTIG38 | 168920 | 169255 | 1.23 | 3.34E-02 | transcription_start_site | + | 169403 | 169403 | -315  | 12133 | AN2332 |
| 1552 | CONTIG38 | 168920 | 169255 | 1.23 | 3.34E-02 | transcription_start_site | + | 169705 | 169705 | -617  | 12134 | AN2332 |
| 1552 | CONTIG38 | 168920 | 169255 | 1.23 | 3.34E-02 | transcription_start_site | + | 169905 | 169905 | -817  | 12135 | AN2332 |
| 787  | CONTIG38 | 181968 | 182242 | 1.96 | 1.45E-03 | transcription_start_site | - | 179033 | 179033 | -3072 | 12141 | AN2335 |
| 787  | CONTIG38 | 181968 | 182242 | 1.96 | 1.45E-03 | transcription_start_site | - | 178668 | 178668 | -3437 | 12142 | AN2335 |
| 787  | CONTIG38 | 181968 | 182242 | 1.96 | 1.45E-03 | transcription_start_site | - | 178110 | 178110 | -3995 | 12143 | AN2335 |
| 787  | CONTIG38 | 181968 | 182242 | 1.96 | 1.45E-03 | transcription_start_site | - | 181842 | 181842 | -263  | 12144 | AN2336 |
| 787  | CONTIG38 | 181968 | 182242 | 1.96 | 1.45E-03 | transcription_start_site | - | 181231 | 181231 | -874  | 12145 | AN2336 |
| 787  | CONTIG38 | 181968 | 182242 | 1.96 | 1.45E-03 | transcription_start_site | + | 185784 | 185784 | -3679 | 12146 | AN2337 |
| 787  | CONTIG38 | 181968 | 182242 | 1.96 | 1.45E-03 | transcription_start_site | + | 185874 | 185874 | -3769 | 12147 | AN2337 |
| 787  | CONTIG38 | 181968 | 182242 | 1.96 | 1.45E-03 | transcription_start_site | + | 186269 | 186269 | -4164 | 12148 | AN2337 |
| 1288 | CONTIG38 | 188638 | 188982 | 1.45 | 1.37E-02 | transcription_start_site | - | 187828 | 187828 | -982  | 12149 | AN2338 |
| 1786 | CONTIG38 | 187958 | 188302 | 1.08 | 6.04E-02 | transcription_start_site | - | 187828 | 187828 | -302  | 12149 | AN2338 |
| 1288 | CONTIG38 | 188638 | 188982 | 1.45 | 1.37E-02 | transcription_start_site | + | 191482 | 191482 | -2672 | 12150 | AN2339 |
| 1288 | CONTIG38 | 188638 | 188982 | 1.45 | 1.37E-02 | transcription_start_site | + | 191762 | 191762 | -2952 | 12151 | AN2339 |
| 1288 | CONTIG38 | 188638 | 188982 | 1.45 | 1.37E-02 | transcription_start_site | + | 192193 | 192193 | -3383 | 12152 | AN2339 |
| 1786 | CONTIG38 | 187958 | 188302 | 1.08 | 6.04E-02 | transcription_start_site | + | 191482 | 191482 | -3352 | 12150 | AN2339 |
| 1786 | CONTIG38 | 187958 | 188302 | 1.08 | 6.04E-02 | transcription_start_site | + | 191762 | 191762 | -3632 | 12151 | AN2339 |
| 1786 | CONTIG38 | 187958 | 188302 | 1.08 | 6.04E-02 | transcription_start_site | + | 192193 | 192193 | -4063 | 12152 | AN2339 |
| 1603 | CONTIG38 | 203266 | 203771 | 1.2  | 3.70E-02 | transcription_start_site | - | 203096 | 203096 | -422  | 12156 | AN2343 |
| 1603 | CONTIG38 | 203266 | 203771 | 1.2  | 3.70E-02 | transcription_start_site | - | 202710 | 202710 | -808  | 12157 | AN2343 |
| 1603 | CONTIG38 | 203266 | 203771 | 1.2  | 3.70E-02 | transcription_start_site | - | 202534 | 202534 | -984  | 12158 | AN2343 |
| 1603 | CONTIG38 | 203266 | 203771 | 1.2  | 3.70E-02 | transcription_start_site | + | 206029 | 206029 | -2510 | 12159 | AN2344 |
| 1603 | CONTIG38 | 203266 | 203771 | 1.2  | 3.70E-02 | transcription_start_site | + | 206265 | 206265 | -2746 | 12160 | AN2344 |
| 1603 | CONTIG38 | 203266 | 203771 | 1.2  | 3.70E-02 | transcription_start_site | + | 206345 | 206345 | -2826 | 12161 | AN2344 |
| 2085 | CONTIG38 | 228317 | 228661 | 0.89 | 1.22E-01 | transcription_start_site | + | 228757 | 228757 | -268  | 12170 | AN2349 |
| 2085 | CONTIG38 | 228317 | 228661 | 0.89 | 1.22E-01 | transcription_start_site | + | 228942 | 228942 | -453  | 12171 | AN2349 |
| 2085 | CONTIG38 | 228317 | 228661 | 0.89 | 1.22E-01 | transcription_start_site | + | 229176 | 229176 | -687  | 12172 | AN2349 |
| 2085 | CONTIG38 | 228317 | 228661 | 0.89 | 1.22E-01 | transcription_start_site | + | 229890 | 229890 | -1401 | 12173 | AN2349 |
| 2085 | CONTIG38 | 228317 | 228661 | 0.89 | 1.22E-01 | transcription_start_site | + | 232132 | 232132 | -3643 | 12174 | AN2349 |
| 1282 | CONTIG39 | 35864  | 36278  | 1.46 | 4.20E-02 | transcription_start_site | - | 31233  | 31233  | -4838 | 12201 | AN2360 |
| 1282 | CONTIG39 | 35864  | 36278  | 1.46 | 4.20E-02 | transcription_start_site | - | 31050  | 31050  | -5021 | 12202 | AN2360 |
| 1282 | CONTIG39 | 35864  | 36278  | 1.46 | 4.20E-02 | transcription_start_site | - | 32647  | 32647  | -3424 | 12203 | AN2361 |
| 1282 | CONTIG39 | 35864  | 36278  | 1.46 | 4.20E-02 | transcription_start_site | - | 32428  | 32428  | -3643 | 12204 | AN2361 |
| 1282 | CONTIG39 | 35864  | 36278  | 1.46 | 4.20E-02 | transcription_start_site | - | 34743  | 34743  | -1328 | 12205 | AN2362 |
| 1282 | CONTIG39 | 35864  | 36278  | 1.46 | 4.20E-02 | transcription_start_site | - | 34478  | 34478  | -1593 | 12206 | AN2362 |
| 1282 | CONTIG39 | 35864  | 36278  | 1.46 | 4.20E-02 | transcription_start_site | - | 34033  | 34033  | -2038 | 12207 | AN2362 |
| 1282 | CONTIG39 | 35864  | 36278  | 1.46 | 4.20E-02 | transcription_start_site | - | 33864  | 33864  | -2207 | 12208 | AN2362 |
| 1282 | CONTIG39 | 35864  | 36278  | 1.46 | 4.20E-02 | transcription_start_site | - | 33669  | 33669  | -2402 | 12209 | AN2362 |
| 1282 | CONTIG39 | 35864  | 36278  | 1.46 | 4.20E-02 | transcription_start_site | + | 36466  | 36466  | -395  | 12210 | AN2363 |
| 1282 | CONTIG39 | 35864  | 36278  | 1.46 | 4.20E-02 | transcription_start_site | + | 36604  | 36604  | -533  | 12211 | AN2363 |
| 1282 | CONTIG39 | 35864  | 36278  | 1.46 | 4.20E-02 | transcription_start_site | + | 37815  | 37815  | -1744 | 12212 | AN2363 |
| 1282 | CONTIG39 | 35864  | 36278  | 1.46 | 4.20E-02 | transcription_start_site | + | 38583  | 38583  | -2512 | 12213 | AN2363 |
| 1282 | CONTIG39 | 35864  | 36278  | 1.46 | 4.20E-02 | transcription_start_site | + | 39661  | 39661  | -3590 | 12214 | AN2363 |
| 1282 | CONTIG39 | 35864  | 36278  | 1.46 | 4.20E-02 | transcription_start_site | + | 40006  | 40006  | -3935 | 12215 | AN2363 |
| 1282 | CONTIG39 | 35864  | 36278  | 1.46 | 4.20E-02 | transcription_start_site | + | 40171  | 40171  | -4100 | 12216 | AN2363 |
| 206  | CONTIG39 | 49954  | 50383  | 2.81 | 0.00E+00 | transcription_start_site | - | 45846  | 45846  | -4322 | 12219 | AN2365 |
| 206  | CONTIG39 | 49954  | 50383  | 2.81 | 0.00E+00 | transcription_start_site | - | 45244  | 45244  | -4924 | 12220 | AN2365 |
| 206  | CONTIG39 | 49954  | 50383  | 2.81 | 0.00E+00 | transcription_start_site | + | 50426  | 50426  | -257  | 12222 | AN2366 |



|      |          |        |        |      |          |                          |   |        |        |       |       |        |
|------|----------|--------|--------|------|----------|--------------------------|---|--------|--------|-------|-------|--------|
| 206  | CONTIG39 | 49954  | 50383  | 2.81 | 0.00E+00 | transcription_start_site | + | 53717  | 53717  | -3548 | 12226 | AN2368 |
| 206  | CONTIG39 | 49954  | 50383  | 2.81 | 0.00E+00 | transcription_start_site | + | 54018  | 54018  | -3849 | 12227 | AN2368 |
| 206  | CONTIG39 | 49954  | 50383  | 2.81 | 0.00E+00 | transcription_start_site | + | 54463  | 54463  | -4294 | 12228 | AN2368 |
| 206  | CONTIG39 | 49954  | 50383  | 2.81 | 0.00E+00 | transcription_start_site | + | 54541  | 54541  | -4372 | 12229 | AN2368 |
| 206  | CONTIG39 | 49954  | 50383  | 2.81 | 0.00E+00 | transcription_start_site | + | 54881  | 54881  | -4712 | 12230 | AN2368 |
| 1801 | CONTIG39 | 74710  | 75430  | 1.07 | 6.93E-02 | transcription_start_site | - | 74349  | 74349  | -721  | 12249 | AN2374 |
| 1801 | CONTIG39 | 74710  | 75430  | 1.07 | 6.93E-02 | transcription_start_site | - | 73938  | 73938  | -1132 | 12250 | AN2374 |
| 1801 | CONTIG39 | 74710  | 75430  | 1.07 | 6.93E-02 | transcription_start_site | + | 75197  | 75197  | -127  | 12251 | AN2375 |
| 1801 | CONTIG39 | 74710  | 75430  | 1.07 | 6.93E-02 | transcription_start_site | + | 75396  | 75396  | -326  | 12252 | AN2375 |
| 1801 | CONTIG39 | 74710  | 75430  | 1.07 | 6.93E-02 | transcription_start_site | + | 76004  | 76004  | -934  | 12253 | AN2375 |
| 1801 | CONTIG39 | 74710  | 75430  | 1.07 | 6.93E-02 | transcription_start_site | + | 76211  | 76211  | -1141 | 12254 | AN2375 |
| 1801 | CONTIG39 | 74710  | 75430  | 1.07 | 6.93E-02 | transcription_start_site | + | 76445  | 76445  | -1375 | 12255 | AN2375 |
| 1801 | CONTIG39 | 74710  | 75430  | 1.07 | 6.93E-02 | transcription_start_site | + | 76866  | 76866  | -1796 | 12256 | AN2375 |
| 1801 | CONTIG39 | 74710  | 75430  | 1.07 | 6.93E-02 | transcription_start_site | + | 79943  | 79943  | -4873 | 12260 | AN2377 |
| 1801 | CONTIG39 | 74710  | 75430  | 1.07 | 6.93E-02 | transcription_start_site | + | 80185  | 80185  | -5115 | 12261 | AN2377 |
| 398  | CONTIG39 | 102617 | 103026 | 2.45 | 1.45E-03 | transcription_start_site | - | 101937 | 101937 | -884  | 12284 | AN2385 |
| 1932 | CONTIG39 | 107868 | 108137 | 0.99 | 1.76E-01 | transcription_start_site | + | 108290 | 108290 | -287  | 12285 | AN2386 |
| 1932 | CONTIG39 | 107868 | 108137 | 0.99 | 1.76E-01 | transcription_start_site | + | 108694 | 108694 | -691  | 12286 | AN2386 |
| 1932 | CONTIG39 | 107868 | 108137 | 0.99 | 1.76E-01 | transcription_start_site | + | 108817 | 108817 | -814  | 12287 | AN2386 |
| 1932 | CONTIG39 | 107868 | 108137 | 0.99 | 1.76E-01 | transcription_start_site | + | 109166 | 109166 | -1163 | 12288 | AN2386 |
| 1932 | CONTIG39 | 107868 | 108137 | 0.99 | 1.76E-01 | transcription_start_site | + | 109290 | 109290 | -1287 | 12289 | AN2386 |
| 1932 | CONTIG39 | 107868 | 108137 | 0.99 | 1.76E-01 | transcription_start_site | + | 109405 | 109405 | -1402 | 12290 | AN2386 |
| 1932 | CONTIG39 | 107868 | 108137 | 0.99 | 1.76E-01 | transcription_start_site | + | 110340 | 110340 | -2337 | 12291 | AN2387 |
| 1932 | CONTIG39 | 107868 | 108137 | 0.99 | 1.76E-01 | transcription_start_site | + | 110698 | 110698 | -2695 | 12292 | AN2387 |
| 1932 | CONTIG39 | 107868 | 108137 | 0.99 | 1.76E-01 | transcription_start_site | + | 110859 | 110859 | -2856 | 12293 | AN2387 |
| 1932 | CONTIG39 | 107868 | 108137 | 0.99 | 1.76E-01 | transcription_start_site | + | 111257 | 111257 | -3254 | 12294 | AN2387 |
| 1932 | CONTIG39 | 107868 | 108137 | 0.99 | 1.76E-01 | transcription_start_site | + | 111549 | 111549 | -3546 | 12295 | AN2387 |
| 1932 | CONTIG39 | 107868 | 108137 | 0.99 | 1.76E-01 | transcription_start_site | + | 112816 | 112816 | -4813 | 12296 | AN2388 |
| 1932 | CONTIG39 | 107868 | 108137 | 0.99 | 1.76E-01 | transcription_start_site | + | 113073 | 113073 | -5070 | 12297 | AN2388 |
| 583  | CONTIG39 | 125926 | 126207 | 2.21 | 4.01E-03 | transcription_start_site | - | 125946 | 125946 | -120  | 12309 | AN2391 |
| 583  | CONTIG39 | 125926 | 126207 | 2.21 | 4.01E-03 | transcription_start_site | - | 125673 | 125673 | -393  | 12310 | AN2391 |
| 583  | CONTIG39 | 125926 | 126207 | 2.21 | 4.01E-03 | transcription_start_site | - | 125454 | 125454 | -612  | 12311 | AN2391 |
| 583  | CONTIG39 | 125926 | 126207 | 2.21 | 4.01E-03 | transcription_start_site | - | 123601 | 123601 | -2465 | 12312 | AN2391 |
| 1139 | CONTIG39 | 128496 | 128750 | 1.58 | 3.01E-02 | transcription_start_site | - | 125946 | 125946 | -2677 | 12309 | AN2391 |
| 1139 | CONTIG39 | 128496 | 128750 | 1.58 | 3.01E-02 | transcription_start_site | - | 125673 | 125673 | -2950 | 12310 | AN2391 |
| 1139 | CONTIG39 | 128496 | 128750 | 1.58 | 3.01E-02 | transcription_start_site | - | 125454 | 125454 | -3169 | 12311 | AN2391 |
| 1139 | CONTIG39 | 128496 | 128750 | 1.58 | 3.01E-02 | transcription_start_site | - | 123601 | 123601 | -5022 | 12312 | AN2391 |
| 1920 | CONTIG39 | 126696 | 128096 | 0.99 | 9.04E-02 | transcription_start_site | - | 125946 | 125946 | -1450 | 12309 | AN2391 |
| 1920 | CONTIG39 | 126696 | 128096 | 0.99 | 9.04E-02 | transcription_start_site | - | 125673 | 125673 | -1723 | 12310 | AN2391 |
| 1920 | CONTIG39 | 126696 | 128096 | 0.99 | 9.04E-02 | transcription_start_site | - | 125454 | 125454 | -1942 | 12311 | AN2391 |
| 1920 | CONTIG39 | 126696 | 128096 | 0.99 | 9.04E-02 | transcription_start_site | - | 123601 | 123601 | -3795 | 12312 | AN2391 |
| 583  | CONTIG39 | 125926 | 126207 | 2.21 | 4.01E-03 | transcription_start_site | + | 130155 | 130155 | -4088 | 12313 | AN2392 |
| 583  | CONTIG39 | 125926 | 126207 | 2.21 | 4.01E-03 | transcription_start_site | + | 130346 | 130346 | -4279 | 12314 | AN2392 |
| 1139 | CONTIG39 | 128496 | 128750 | 1.58 | 3.01E-02 | transcription_start_site | + | 130155 | 130155 | -1532 | 12313 | AN2392 |
| 1139 | CONTIG39 | 128496 | 128750 | 1.58 | 3.01E-02 | transcription_start_site | + | 130346 | 130346 | -1723 | 12314 | AN2392 |
| 1139 | CONTIG39 | 128496 | 128750 | 1.58 | 3.01E-02 | transcription_start_site | + | 131448 | 131448 | -2825 | 12315 | AN2392 |
| 1139 | CONTIG39 | 128496 | 128750 | 1.58 | 3.01E-02 | transcription_start_site | + | 131697 | 131697 | -3074 | 12316 | AN2392 |
| 1920 | CONTIG39 | 126696 | 128096 | 0.99 | 9.04E-02 | transcription_start_site | + | 130155 | 130155 | -2759 | 12313 | AN2392 |
| 1920 | CONTIG39 | 126696 | 128096 | 0.99 | 9.04E-02 | transcription_start_site | + | 130346 | 130346 | -2950 | 12314 | AN2392 |
| 1920 | CONTIG39 | 126696 | 128096 | 0.99 | 9.04E-02 | transcription_start_site | + | 131448 | 131448 | -4052 | 12315 | AN2392 |
| 1920 | CONTIG39 | 126696 | 128096 | 0.99 | 9.04E-02 | transcription_start_site | + | 131697 | 131697 | -4301 | 12316 | AN2392 |
| 615  | CONTIG39 | 142876 | 143235 | 2.17 | 4.57E-03 | transcription_start_site | - | 138263 | 138263 | -4792 | 12319 | AN2394 |
| 615  | CONTIG39 | 142876 | 143235 | 2.17 | 4.57E-03 | transcription_start_site | - | 138054 | 138054 | -5001 | 12320 | AN2394 |
| 615  | CONTIG39 | 142876 | 143235 | 2.17 | 4.57E-03 | transcription_start_site | - | 142224 | 142224 | -831  | 12322 | AN2395 |
| 615  | CONTIG39 | 142876 | 143235 | 2.17 | 4.57E-03 | transcription_start_site | - | 141827 | 141827 | -1228 | 12323 | AN2395 |
| 615  | CONTIG39 | 142876 | 143235 | 2.17 | 4.57E-03 | transcription_start_site | - | 141561 | 141561 | -1494 | 12324 | AN2395 |
| 615  | CONTIG39 | 142876 | 143235 | 2.17 | 4.57E-03 | transcription_start_site | - | 141318 | 141318 | -1737 | 12325 | AN2395 |

|      |          |        |        |      |          |                          |   |        |        |       |       |        |
|------|----------|--------|--------|------|----------|--------------------------|---|--------|--------|-------|-------|--------|
| 615  | CONTIG39 | 142876 | 143235 | 2.17 | 4.57E-03 | transcription_start_site | - | 140851 | 140851 | -2204 | 12326 | AN2395 |
| 615  | CONTIG39 | 142876 | 143235 | 2.17 | 4.57E-03 | transcription_start_site | - | 140600 | 140600 | -2455 | 12327 | AN2395 |
| 615  | CONTIG39 | 142876 | 143235 | 2.17 | 4.57E-03 | transcription_start_site | - | 140395 | 140395 | -2660 | 12328 | AN2395 |
| 615  | CONTIG39 | 142876 | 143235 | 2.17 | 4.57E-03 | transcription_start_site | - | 143798 | 143798 | 742   | 12330 | AN2396 |
| 615  | CONTIG39 | 142876 | 143235 | 2.17 | 4.57E-03 | transcription_start_site | + | 145043 | 145043 | -1987 | 12331 | AN2397 |
| 615  | CONTIG39 | 142876 | 143235 | 2.17 | 4.57E-03 | transcription_start_site | + | 145236 | 145236 | -2180 | 12332 | AN2397 |
| 615  | CONTIG39 | 142876 | 143235 | 2.17 | 4.57E-03 | transcription_start_site | + | 146510 | 146510 | -3454 | 12333 | AN2397 |
| 1140 | CONTIG39 | 154519 | 154868 | 1.58 | 3.01E-02 | transcription_start_site | - | 150954 | 150954 | -3739 | 12338 | AN2399 |
| 1140 | CONTIG39 | 154519 | 154868 | 1.58 | 3.01E-02 | transcription_start_site | - | 150836 | 150836 | -3857 | 12339 | AN2399 |
| 1140 | CONTIG39 | 154519 | 154868 | 1.58 | 3.01E-02 | transcription_start_site | - | 150711 | 150711 | -3982 | 12340 | AN2399 |
| 1140 | CONTIG39 | 154519 | 154868 | 1.58 | 3.01E-02 | transcription_start_site | - | 150545 | 150545 | -4148 | 12341 | AN2399 |
| 1140 | CONTIG39 | 154519 | 154868 | 1.58 | 3.01E-02 | transcription_start_site | - | 150466 | 150466 | -4227 | 12342 | AN2399 |
| 1140 | CONTIG39 | 154519 | 154868 | 1.58 | 3.01E-02 | transcription_start_site | - | 154543 | 154543 | -150  | 12348 | AN2401 |
| 1140 | CONTIG39 | 154519 | 154868 | 1.58 | 3.01E-02 | transcription_start_site | - | 155719 | 155719 | 1025  | 12347 | AN2401 |
| 1140 | CONTIG39 | 154519 | 154868 | 1.58 | 3.01E-02 | transcription_start_site | - | 153565 | 153565 | -1128 | 12349 | AN2401 |
| 1140 | CONTIG39 | 154519 | 154868 | 1.58 | 3.01E-02 | transcription_start_site | + | 157427 | 157427 | -2733 | 12350 | AN2402 |
| 1140 | CONTIG39 | 154519 | 154868 | 1.58 | 3.01E-02 | transcription_start_site | + | 157585 | 157585 | -2891 | 12351 | AN2402 |
| 1624 | CONTIG39 | 167188 | 167701 | 1.19 | 9.60E-02 | transcription_start_site | - | 167363 | 167363 | -81   | 12352 | AN2404 |
| 1624 | CONTIG39 | 167188 | 167701 | 1.19 | 9.60E-02 | transcription_start_site | - | 166447 | 166447 | -997  | 12353 | AN2404 |
| 1624 | CONTIG39 | 167188 | 167701 | 1.19 | 9.60E-02 | transcription_start_site | + | 171417 | 171417 | -3972 | 12355 | AN2406 |
| 1624 | CONTIG39 | 167188 | 167701 | 1.19 | 9.60E-02 | transcription_start_site | + | 171795 | 171795 | -4350 | 12356 | AN2406 |
| 909  | CONTIG39 | 177078 | 177600 | 1.82 | 1.37E-02 | transcription_start_site | + | 176237 | 176237 | 1102  | 12364 | AN2407 |
| 909  | CONTIG39 | 177078 | 177600 | 1.82 | 1.37E-02 | transcription_start_site | + | 179872 | 179872 | -2533 | 12365 | AN2408 |
| 262  | CONTIG39 | 186903 | 187402 | 2.69 | 2.26E-04 | transcription_start_site | + | 188583 | 188583 | -1430 | 12366 | AN2410 |
| 262  | CONTIG39 | 186903 | 187402 | 2.69 | 2.26E-04 | transcription_start_site | + | 188779 | 188779 | -1626 | 12367 | AN2410 |
| 262  | CONTIG39 | 186903 | 187402 | 2.69 | 2.26E-04 | transcription_start_site | + | 190560 | 190560 | -3407 | 12368 | AN2411 |
| 262  | CONTIG39 | 186903 | 187402 | 2.69 | 2.26E-04 | transcription_start_site | + | 190843 | 190843 | -3690 | 12369 | AN2411 |
| 262  | CONTIG39 | 186903 | 187402 | 2.69 | 2.26E-04 | transcription_start_site | + | 191294 | 191294 | -4141 | 12370 | AN2411 |
| 262  | CONTIG39 | 186903 | 187402 | 2.69 | 2.26E-04 | transcription_start_site | + | 191894 | 191894 | -4741 | 12371 | AN2411 |
| 148  | CONTIG39 | 224195 | 225205 | 2.96 | 0.00E+00 | transcription_start_site | + | 228887 | 228887 | -4187 | 12403 | AN2421 |
| 148  | CONTIG39 | 224195 | 225205 | 2.96 | 0.00E+00 | transcription_start_site | + | 229398 | 229398 | -4698 | 12404 | AN2421 |
| 148  | CONTIG39 | 224195 | 225205 | 2.96 | 0.00E+00 | transcription_start_site | + | 229949 | 229949 | -5249 | 12405 | AN2421 |
| 353  | CONTIG39 | 227270 | 228215 | 2.53 | 7.97E-04 | transcription_start_site | + | 228887 | 228887 | -1144 | 12403 | AN2421 |
| 353  | CONTIG39 | 227270 | 228215 | 2.53 | 7.97E-04 | transcription_start_site | + | 229398 | 229398 | -1655 | 12404 | AN2421 |
| 353  | CONTIG39 | 227270 | 228215 | 2.53 | 7.97E-04 | transcription_start_site | + | 229949 | 229949 | -2206 | 12405 | AN2421 |
| 353  | CONTIG39 | 227270 | 228215 | 2.53 | 7.97E-04 | transcription_start_site | + | 231469 | 231469 | -3726 | 12406 | AN2422 |
| 353  | CONTIG39 | 227270 | 228215 | 2.53 | 7.97E-04 | transcription_start_site | + | 231714 | 231714 | -3971 | 12407 | AN2422 |
| 353  | CONTIG39 | 227270 | 228215 | 2.53 | 7.97E-04 | transcription_start_site | + | 231827 | 231827 | -4084 | 12408 | AN2422 |
| 353  | CONTIG39 | 227270 | 228215 | 2.53 | 7.97E-04 | transcription_start_site | + | 232260 | 232260 | -4517 | 12409 | AN2422 |
| 42   | CONTIG40 | 14259  | 14613  | 3.28 | 0.00E+00 | transcription_start_site | + | 15158  | 15158  | -722  | 12415 | AN2425 |
| 42   | CONTIG40 | 14259  | 14613  | 3.28 | 0.00E+00 | transcription_start_site | + | 15298  | 15298  | -862  | 12416 | AN2425 |
| 42   | CONTIG40 | 14259  | 14613  | 3.28 | 0.00E+00 | transcription_start_site | + | 15590  | 15590  | -1154 | 12417 | AN2425 |
| 276  | CONTIG40 | 12377  | 13628  | 2.67 | 1.62E-03 | transcription_start_site | + | 15158  | 15158  | -2155 | 12415 | AN2425 |
| 276  | CONTIG40 | 12377  | 13628  | 2.67 | 1.62E-03 | transcription_start_site | + | 15298  | 15298  | -2295 | 12416 | AN2425 |
| 276  | CONTIG40 | 12377  | 13628  | 2.67 | 1.62E-03 | transcription_start_site | + | 15590  | 15590  | -2587 | 12417 | AN2425 |
| 42   | CONTIG40 | 14259  | 14613  | 3.28 | 0.00E+00 | transcription_start_site | + | 19059  | 19059  | -4623 | 12418 | AN2426 |
| 42   | CONTIG40 | 14259  | 14613  | 3.28 | 0.00E+00 | transcription_start_site | + | 19235  | 19235  | -4799 | 12419 | AN2426 |
| 1977 | CONTIG40 | 18394  | 18953  | 0.96 | 1.81E-01 | transcription_start_site | + | 19059  | 19059  | -385  | 12418 | AN2426 |
| 1977 | CONTIG40 | 18394  | 18953  | 0.96 | 1.81E-01 | transcription_start_site | + | 19235  | 19235  | -561  | 12419 | AN2426 |
| 854  | CONTIG40 | 21679  | 22044  | 1.88 | 2.05E-02 | transcription_start_site | + | 22461  | 22461  | -599  | 12420 | AN2427 |
| 1977 | CONTIG40 | 18394  | 18953  | 0.96 | 1.81E-01 | transcription_start_site | + | 22461  | 22461  | -3787 | 12420 | AN2427 |
| 855  | CONTIG40 | 48228  | 48512  | 1.88 | 2.05E-02 | transcription_start_site | - | 47314  | 47314  | -1056 | 12440 | AN2435 |
| 855  | CONTIG40 | 48228  | 48512  | 1.88 | 2.05E-02 | transcription_start_site | - | 46816  | 46816  | -1554 | 12441 | AN2435 |
| 855  | CONTIG40 | 48228  | 48512  | 1.88 | 2.05E-02 | transcription_start_site | + | 49235  | 49235  | -865  | 12442 | AN2436 |
| 855  | CONTIG40 | 48228  | 48512  | 1.88 | 2.05E-02 | transcription_start_site | + | 49426  | 49426  | -1056 | 12443 | AN2436 |
| 855  | CONTIG40 | 48228  | 48512  | 1.88 | 2.05E-02 | transcription_start_site | + | 49600  | 49600  | -1230 | 12444 | AN2436 |
| 855  | CONTIG40 | 48228  | 48512  | 1.88 | 2.05E-02 | transcription_start_site | + | 49846  | 49846  | -1476 | 12445 | AN2436 |

|      |          |        |        |      |          |                          |   |        |        |       |       |        |
|------|----------|--------|--------|------|----------|--------------------------|---|--------|--------|-------|-------|--------|
| 855  | CONTIG40 | 48228  | 48512  | 1.88 | 2.05E-02 | transcription_start_site | + | 51001  | 51001  | -2631 | 12446 | AN2436 |
| 855  | CONTIG40 | 48228  | 48512  | 1.88 | 2.05E-02 | transcription_start_site | + | 51971  | 51971  | -3601 | 12447 | AN2437 |
| 855  | CONTIG40 | 48228  | 48512  | 1.88 | 2.05E-02 | transcription_start_site | + | 52310  | 52310  | -3940 | 12448 | AN2437 |
| 742  | CONTIG40 | 108905 | 109184 | 2.01 | 1.37E-02 | transcription_start_site | - | 109745 | 109745 | 700   | 12506 | AN2459 |
| 742  | CONTIG40 | 108905 | 109184 | 2.01 | 1.37E-02 | transcription_start_site | - | 105487 | 105487 | -3557 | 12507 | AN2459 |
| 743  | CONTIG40 | 110045 | 110304 | 2.01 | 1.37E-02 | transcription_start_site | - | 109745 | 109745 | -429  | 12506 | AN2459 |
| 743  | CONTIG40 | 110045 | 110304 | 2.01 | 1.37E-02 | transcription_start_site | - | 105487 | 105487 | -4687 | 12507 | AN2459 |
| 742  | CONTIG40 | 108905 | 109184 | 2.01 | 1.37E-02 | transcription_start_site | + | 111434 | 111434 | -2389 | 12508 | AN2460 |
| 743  | CONTIG40 | 110045 | 110304 | 2.01 | 1.37E-02 | transcription_start_site | + | 111434 | 111434 | -1259 | 12508 | AN2460 |
| 742  | CONTIG40 | 108905 | 109184 | 2.01 | 1.37E-02 | transcription_start_site | + | 113743 | 113743 | -4698 | 12509 | AN2461 |
| 742  | CONTIG40 | 108905 | 109184 | 2.01 | 1.37E-02 | transcription_start_site | + | 113818 | 113818 | -4773 | 12510 | AN2461 |
| 742  | CONTIG40 | 108905 | 109184 | 2.01 | 1.37E-02 | transcription_start_site | + | 113947 | 113947 | -4902 | 12511 | AN2461 |
| 743  | CONTIG40 | 110045 | 110304 | 2.01 | 1.37E-02 | transcription_start_site | + | 113743 | 113743 | -3568 | 12509 | AN2461 |
| 743  | CONTIG40 | 110045 | 110304 | 2.01 | 1.37E-02 | transcription_start_site | + | 113818 | 113818 | -3643 | 12510 | AN2461 |
| 743  | CONTIG40 | 110045 | 110304 | 2.01 | 1.37E-02 | transcription_start_site | + | 113947 | 113947 | -3772 | 12511 | AN2461 |
| 743  | CONTIG40 | 110045 | 110304 | 2.01 | 1.37E-02 | transcription_start_site | + | 114299 | 114299 | -4124 | 12512 | AN2461 |
| 743  | CONTIG40 | 110045 | 110304 | 2.01 | 1.37E-02 | transcription_start_site | + | 114975 | 114975 | -4800 | 12513 | AN2461 |
| 743  | CONTIG40 | 110045 | 110304 | 2.01 | 1.37E-02 | transcription_start_site | + | 115259 | 115259 | -5084 | 12514 | AN2461 |
| 1700 | CONTIG40 | 123530 | 123819 | 1.14 | 1.54E-01 | transcription_start_site | + | 124203 | 124203 | -528  | 12520 | AN2463 |
| 1700 | CONTIG40 | 123530 | 123819 | 1.14 | 1.54E-01 | transcription_start_site | + | 125799 | 125799 | -2124 | 12521 | AN2463 |
| 930  | CONTIG40 | 133741 | 134005 | 1.8  | 2.63E-02 | transcription_start_site | - | 129221 | 129221 | -4652 | 12522 | AN2464 |
| 930  | CONTIG40 | 133741 | 134005 | 1.8  | 2.63E-02 | transcription_start_site | - | 129037 | 129037 | -4836 | 12523 | AN2464 |
| 1647 | CONTIG40 | 129545 | 129819 | 1.18 | 1.38E-01 | transcription_start_site | - | 129221 | 129221 | -461  | 12522 | AN2464 |
| 1647 | CONTIG40 | 129545 | 129819 | 1.18 | 1.38E-01 | transcription_start_site | - | 129037 | 129037 | -645  | 12523 | AN2464 |
| 1647 | CONTIG40 | 129545 | 129819 | 1.18 | 1.38E-01 | transcription_start_site | - | 128245 | 128245 | -1437 | 12524 | AN2464 |
| 930  | CONTIG40 | 133741 | 134005 | 1.8  | 2.63E-02 | transcription_start_site | - | 133549 | 133549 | -324  | 12525 | AN2465 |
| 930  | CONTIG40 | 133741 | 134005 | 1.8  | 2.63E-02 | transcription_start_site | - | 133151 | 133151 | -722  | 12526 | AN2465 |
| 930  | CONTIG40 | 133741 | 134005 | 1.8  | 2.63E-02 | transcription_start_site | - | 131703 | 131703 | -2170 | 12527 | AN2465 |
| 930  | CONTIG40 | 133741 | 134005 | 1.8  | 2.63E-02 | transcription_start_site | - | 131323 | 131323 | -2550 | 12528 | AN2465 |
| 930  | CONTIG40 | 133741 | 134005 | 1.8  | 2.63E-02 | transcription_start_site | - | 131090 | 131090 | -2783 | 12529 | AN2465 |
| 930  | CONTIG40 | 133741 | 134005 | 1.8  | 2.63E-02 | transcription_start_site | - | 130840 | 130840 | -3033 | 12530 | AN2465 |
| 108  | CONTIG40 | 140711 | 141070 | 3.07 | 2.69E-04 | transcription_start_site | - | 139652 | 139652 | -1238 | 12531 | AN2466 |
| 108  | CONTIG40 | 140711 | 141070 | 3.07 | 2.69E-04 | transcription_start_site | - | 139478 | 139478 | -1412 | 12532 | AN2466 |
| 108  | CONTIG40 | 140711 | 141070 | 3.07 | 2.69E-04 | transcription_start_site | - | 139219 | 139219 | -1671 | 12533 | AN2466 |
| 108  | CONTIG40 | 140711 | 141070 | 3.07 | 2.69E-04 | transcription_start_site | - | 139043 | 139043 | -1847 | 12534 | AN2466 |
| 140  | CONTIG40 | 140031 | 140600 | 2.98 | 2.26E-04 | transcription_start_site | - | 139652 | 139652 | -663  | 12531 | AN2466 |
| 140  | CONTIG40 | 140031 | 140600 | 2.98 | 2.26E-04 | transcription_start_site | - | 139478 | 139478 | -837  | 12532 | AN2466 |
| 140  | CONTIG40 | 140031 | 140600 | 2.98 | 2.26E-04 | transcription_start_site | - | 139219 | 139219 | -1096 | 12533 | AN2466 |
| 140  | CONTIG40 | 140031 | 140600 | 2.98 | 2.26E-04 | transcription_start_site | - | 139043 | 139043 | -1272 | 12534 | AN2466 |
| 108  | CONTIG40 | 140711 | 141070 | 3.07 | 2.69E-04 | transcription_start_site | + | 143760 | 143760 | -2869 | 12536 | AN2468 |
| 108  | CONTIG40 | 140711 | 141070 | 3.07 | 2.69E-04 | transcription_start_site | + | 143965 | 143965 | -3074 | 12537 | AN2468 |
| 108  | CONTIG40 | 140711 | 141070 | 3.07 | 2.69E-04 | transcription_start_site | + | 144126 | 144126 | -3235 | 12538 | AN2468 |
| 108  | CONTIG40 | 140711 | 141070 | 3.07 | 2.69E-04 | transcription_start_site | + | 144465 | 144465 | -3574 | 12539 | AN2468 |
| 108  | CONTIG40 | 140711 | 141070 | 3.07 | 2.69E-04 | transcription_start_site | + | 144697 | 144697 | -3806 | 12540 | AN2468 |
| 108  | CONTIG40 | 140711 | 141070 | 3.07 | 2.69E-04 | transcription_start_site | + | 144842 | 144842 | -3951 | 12541 | AN2468 |
| 140  | CONTIG40 | 140031 | 140600 | 2.98 | 2.26E-04 | transcription_start_site | + | 143760 | 143760 | -3444 | 12536 | AN2468 |
| 140  | CONTIG40 | 140031 | 140600 | 2.98 | 2.26E-04 | transcription_start_site | + | 143965 | 143965 | -3649 | 12537 | AN2468 |
| 140  | CONTIG40 | 140031 | 140600 | 2.98 | 2.26E-04 | transcription_start_site | + | 144126 | 144126 | -3810 | 12538 | AN2468 |
| 140  | CONTIG40 | 140031 | 140600 | 2.98 | 2.26E-04 | transcription_start_site | + | 144465 | 144465 | -4149 | 12539 | AN2468 |
| 140  | CONTIG40 | 140031 | 140600 | 2.98 | 2.26E-04 | transcription_start_site | + | 144697 | 144697 | -4381 | 12540 | AN2468 |
| 140  | CONTIG40 | 140031 | 140600 | 2.98 | 2.26E-04 | transcription_start_site | + | 144842 | 144842 | -4526 | 12541 | AN2468 |
| 1963 | CONTIG41 | 3693   | 4637   | 0.97 | 1.08E-01 | transcription_start_site | - | 3019   | 3019   | -1146 | 12542 | AN2469 |
| 1963 | CONTIG41 | 3693   | 4637   | 0.97 | 1.08E-01 | transcription_start_site | - | 2664   | 2664   | -1501 | 12543 | AN2469 |
| 187  | CONTIG41 | 456    | 730    | 2.86 | 4.01E-03 | transcription_start_site | + | 4066   | 4066   | -3473 | 12544 | AN2470 |
| 187  | CONTIG41 | 456    | 730    | 2.86 | 4.01E-03 | transcription_start_site | + | 4293   | 4293   | -3700 | 12545 | AN2470 |
| 187  | CONTIG41 | 456    | 730    | 2.86 | 4.01E-03 | transcription_start_site | + | 4473   | 4473   | -3880 | 12546 | AN2470 |
| 187  | CONTIG41 | 456    | 730    | 2.86 | 4.01E-03 | transcription_start_site | + | 5335   | 5335   | -4742 | 12547 | AN2470 |

|      |          |       |       |      |          |                          |   |       |       |       |       |        |
|------|----------|-------|-------|------|----------|--------------------------|---|-------|-------|-------|-------|--------|
| 1963 | CONTIG41 | 3693  | 4637  | 0.97 | 1.08E-01 | transcription_start_site | + | 4066  | 4066  | 99    | 12544 | AN2470 |
| 1963 | CONTIG41 | 3693  | 4637  | 0.97 | 1.08E-01 | transcription_start_site | + | 4293  | 4293  | -128  | 12545 | AN2470 |
| 1963 | CONTIG41 | 3693  | 4637  | 0.97 | 1.08E-01 | transcription_start_site | + | 4473  | 4473  | -308  | 12546 | AN2470 |
| 1963 | CONTIG41 | 3693  | 4637  | 0.97 | 1.08E-01 | transcription_start_site | + | 5335  | 5335  | -1170 | 12547 | AN2470 |
| 1258 | CONTIG41 | 9759  | 10198 | 1.48 | 1.08E-01 | transcription_start_site | - | 6106  | 6106  | -3872 | 12548 | AN2471 |
| 1258 | CONTIG41 | 9759  | 10198 | 1.48 | 1.08E-01 | transcription_start_site | - | 6010  | 6010  | -3968 | 12549 | AN2471 |
| 1258 | CONTIG41 | 9759  | 10198 | 1.48 | 1.08E-01 | transcription_start_site | - | 5851  | 5851  | -4127 | 12550 | AN2471 |
| 1963 | CONTIG41 | 3693  | 4637  | 0.97 | 1.08E-01 | transcription_start_site | + | 6459  | 6459  | -2294 | 12551 | AN2472 |
| 1963 | CONTIG41 | 3693  | 4637  | 0.97 | 1.08E-01 | transcription_start_site | + | 6579  | 6579  | -2414 | 12552 | AN2472 |
| 1963 | CONTIG41 | 3693  | 4637  | 0.97 | 1.08E-01 | transcription_start_site | + | 6743  | 6743  | -2578 | 12553 | AN2472 |
| 1963 | CONTIG41 | 3693  | 4637  | 0.97 | 1.08E-01 | transcription_start_site | + | 7142  | 7142  | -2977 | 12554 | AN2472 |
| 1258 | CONTIG41 | 9759  | 10198 | 1.48 | 1.08E-01 | transcription_start_site | - | 9879  | 9879  | -99   | 12555 | AN2473 |
| 1258 | CONTIG41 | 9759  | 10198 | 1.48 | 1.08E-01 | transcription_start_site | - | 9511  | 9511  | -467  | 12556 | AN2473 |
| 1258 | CONTIG41 | 9759  | 10198 | 1.48 | 1.08E-01 | transcription_start_site | - | 8869  | 8869  | -1109 | 12557 | AN2473 |
| 207  | CONTIG41 | 15227 | 15593 | 2.81 | 4.57E-03 | transcription_start_site | - | 11990 | 11990 | -3420 | 12558 | AN2474 |
| 207  | CONTIG41 | 15227 | 15593 | 2.81 | 4.57E-03 | transcription_start_site | - | 11881 | 11881 | -3529 | 12559 | AN2474 |
| 394  | CONTIG41 | 15617 | 16644 | 2.45 | 0.00E+00 | transcription_start_site | - | 11990 | 11990 | -4140 | 12558 | AN2474 |
| 394  | CONTIG41 | 15617 | 16644 | 2.45 | 0.00E+00 | transcription_start_site | - | 11881 | 11881 | -4249 | 12559 | AN2474 |
| 207  | CONTIG41 | 15227 | 15593 | 2.81 | 4.57E-03 | transcription_start_site | - | 14444 | 14444 | -966  | 12560 | AN2475 |
| 207  | CONTIG41 | 15227 | 15593 | 2.81 | 4.57E-03 | transcription_start_site | - | 14094 | 14094 | -1316 | 12561 | AN2475 |
| 394  | CONTIG41 | 15617 | 16644 | 2.45 | 0.00E+00 | transcription_start_site | - | 14444 | 14444 | -1686 | 12560 | AN2475 |
| 394  | CONTIG41 | 15617 | 16644 | 2.45 | 0.00E+00 | transcription_start_site | - | 14094 | 14094 | -2036 | 12561 | AN2475 |
| 89   | CONTIG41 | 60845 | 61404 | 3.12 | 1.62E-03 | transcription_start_site | + | 60263 | 60263 | 861   | 12596 | AN2487 |
| 89   | CONTIG41 | 60845 | 61404 | 3.12 | 1.62E-03 | transcription_start_site | + | 61732 | 61732 | -607  | 12597 | AN2488 |
| 89   | CONTIG41 | 60845 | 61404 | 3.12 | 1.62E-03 | transcription_start_site | + | 61926 | 61926 | -801  | 12598 | AN2488 |
| 89   | CONTIG41 | 60845 | 61404 | 3.12 | 1.62E-03 | transcription_start_site | + | 62089 | 62089 | -964  | 12599 | AN2488 |
| 89   | CONTIG41 | 60845 | 61404 | 3.12 | 1.62E-03 | transcription_start_site | + | 62262 | 62262 | -1137 | 12600 | AN2488 |
| 1843 | CONTIG42 | 921   | 1495  | 1.05 | 1.38E-01 | transcription_start_site | + | 1833  | 1833  | -625  | 12601 | AN2489 |
| 1843 | CONTIG42 | 921   | 1495  | 1.05 | 1.38E-01 | transcription_start_site | + | 2076  | 2076  | -868  | 12602 | AN2489 |
| 1843 | CONTIG42 | 921   | 1495  | 1.05 | 1.38E-01 | transcription_start_site | + | 2276  | 2276  | -1068 | 12603 | AN2489 |
| 1843 | CONTIG42 | 921   | 1495  | 1.05 | 1.38E-01 | transcription_start_site | + | 2529  | 2529  | -1321 | 12604 | AN2489 |
| 663  | CONTIG42 | 28803 | 29092 | 2.09 | 5.08E-03 | transcription_start_site | + | 30566 | 30566 | -1618 | 12626 | AN2498 |
| 663  | CONTIG42 | 28803 | 29092 | 2.09 | 5.08E-03 | transcription_start_site | + | 31408 | 31408 | -2460 | 12627 | AN2498 |
| 663  | CONTIG42 | 28803 | 29092 | 2.09 | 5.08E-03 | transcription_start_site | + | 31727 | 31727 | -2779 | 12628 | AN2498 |
| 1179 | CONTIG42 | 36318 | 36812 | 1.55 | 3.01E-02 | transcription_start_site | - | 34922 | 34922 | -1643 | 12629 | AN2499 |
| 1179 | CONTIG42 | 36318 | 36812 | 1.55 | 3.01E-02 | transcription_start_site | - | 34854 | 34854 | -1711 | 12630 | AN2499 |
| 1179 | CONTIG42 | 36318 | 36812 | 1.55 | 3.01E-02 | transcription_start_site | - | 34442 | 34442 | -2123 | 12631 | AN2499 |
| 1179 | CONTIG42 | 36318 | 36812 | 1.55 | 3.01E-02 | transcription_start_site | - | 33287 | 33287 | -3278 | 12632 | AN2499 |
| 1179 | CONTIG42 | 36318 | 36812 | 1.55 | 3.01E-02 | transcription_start_site | - | 36108 | 36108 | -457  | 12633 | AN2500 |
| 1179 | CONTIG42 | 36318 | 36812 | 1.55 | 3.01E-02 | transcription_start_site | - | 35960 | 35960 | -605  | 12634 | AN2500 |
| 1179 | CONTIG42 | 36318 | 36812 | 1.55 | 3.01E-02 | transcription_start_site | - | 35291 | 35291 | -1274 | 12635 | AN2500 |
| 1179 | CONTIG42 | 36318 | 36812 | 1.55 | 3.01E-02 | transcription_start_site | + | 37206 | 37206 | -641  | 12636 | AN2501 |
| 78   | CONTIG42 | 42236 | 42579 | 3.14 | 0.00E+00 | transcription_start_site | - | 40040 | 40040 | -2367 | 12637 | AN2502 |
| 1268 | CONTIG42 | 44571 | 44985 | 1.47 | 3.70E-02 | transcription_start_site | - | 40040 | 40040 | -4738 | 12637 | AN2502 |
| 1355 | CONTIG42 | 42991 | 43647 | 1.39 | 2.30E-02 | transcription_start_site | - | 40040 | 40040 | -3279 | 12637 | AN2502 |
| 78   | CONTIG42 | 42236 | 42579 | 3.14 | 0.00E+00 | transcription_start_site | - | 42981 | 42981 | 573   | 12643 | AN2503 |
| 78   | CONTIG42 | 42236 | 42579 | 3.14 | 0.00E+00 | transcription_start_site | - | 43272 | 43272 | 864   | 12642 | AN2503 |
| 78   | CONTIG42 | 42236 | 42579 | 3.14 | 0.00E+00 | transcription_start_site | - | 43430 | 43430 | 1022  | 12641 | AN2503 |
| 78   | CONTIG42 | 42236 | 42579 | 3.14 | 0.00E+00 | transcription_start_site | - | 43556 | 43556 | 1148  | 12640 | AN2503 |
| 1268 | CONTIG42 | 44571 | 44985 | 1.47 | 3.70E-02 | transcription_start_site | - | 44351 | 44351 | -427  | 12638 | AN2503 |
| 1268 | CONTIG42 | 44571 | 44985 | 1.47 | 3.70E-02 | transcription_start_site | - | 43689 | 43689 | -1089 | 12639 | AN2503 |
| 1268 | CONTIG42 | 44571 | 44985 | 1.47 | 3.70E-02 | transcription_start_site | - | 43556 | 43556 | -1222 | 12640 | AN2503 |
| 1268 | CONTIG42 | 44571 | 44985 | 1.47 | 3.70E-02 | transcription_start_site | - | 43430 | 43430 | -1348 | 12641 | AN2503 |
| 1268 | CONTIG42 | 44571 | 44985 | 1.47 | 3.70E-02 | transcription_start_site | - | 43272 | 43272 | -1506 | 12642 | AN2503 |
| 1268 | CONTIG42 | 44571 | 44985 | 1.47 | 3.70E-02 | transcription_start_site | - | 42981 | 42981 | -1797 | 12643 | AN2503 |
| 1355 | CONTIG42 | 42991 | 43647 | 1.39 | 2.30E-02 | transcription_start_site | - | 43272 | 43272 | -47   | 12642 | AN2503 |
| 1355 | CONTIG42 | 42991 | 43647 | 1.39 | 2.30E-02 | transcription_start_site | - | 43430 | 43430 | 111   | 12641 | AN2503 |

|      |          |       |       |      |          |                          |   |       |       |       |       |        |
|------|----------|-------|-------|------|----------|--------------------------|---|-------|-------|-------|-------|--------|
| 1355 | CONTIG42 | 42991 | 43647 | 1.39 | 2.30E-02 | transcription_start_site | - | 43556 | 43556 | 237   | 12640 | AN2503 |
| 1355 | CONTIG42 | 42991 | 43647 | 1.39 | 2.30E-02 | transcription_start_site | - | 42981 | 42981 | -338  | 12643 | AN2503 |
| 1355 | CONTIG42 | 42991 | 43647 | 1.39 | 2.30E-02 | transcription_start_site | - | 43689 | 43689 | 370   | 12639 | AN2503 |
| 1355 | CONTIG42 | 42991 | 43647 | 1.39 | 2.30E-02 | transcription_start_site | - | 44351 | 44351 | 1032  | 12638 | AN2503 |
| 496  | CONTIG42 | 70802 | 71301 | 2.32 | 1.35E-03 | transcription_start_site | - | 67236 | 67236 | -3815 | 12657 | AN2507 |
| 496  | CONTIG42 | 70802 | 71301 | 2.32 | 1.35E-03 | transcription_start_site | - | 67178 | 67178 | -3873 | 12658 | AN2507 |
| 2030 | CONTIG42 | 68632 | 69141 | 0.93 | 1.97E-01 | transcription_start_site | - | 67236 | 67236 | -1650 | 12657 | AN2507 |
| 2030 | CONTIG42 | 68632 | 69141 | 0.93 | 1.97E-01 | transcription_start_site | - | 67178 | 67178 | -1708 | 12658 | AN2507 |
| 496  | CONTIG42 | 70802 | 71301 | 2.32 | 1.35E-03 | transcription_start_site | + | 70246 | 70246 | 805   | 12660 | AN2508 |
| 2030 | CONTIG42 | 68632 | 69141 | 0.93 | 1.97E-01 | transcription_start_site | + | 68953 | 68953 | -66   | 12659 | AN2508 |
| 2030 | CONTIG42 | 68632 | 69141 | 0.93 | 1.97E-01 | transcription_start_site | + | 70246 | 70246 | -1359 | 12660 | AN2508 |
| 496  | CONTIG42 | 70802 | 71301 | 2.32 | 1.35E-03 | transcription_start_site | + | 72109 | 72109 | -1057 | 12661 | AN2509 |
| 496  | CONTIG42 | 70802 | 71301 | 2.32 | 1.35E-03 | transcription_start_site | + | 72478 | 72478 | -1426 | 12662 | AN2509 |
| 496  | CONTIG42 | 70802 | 71301 | 2.32 | 1.35E-03 | transcription_start_site | + | 73735 | 73735 | -2683 | 12663 | AN2509 |
| 496  | CONTIG42 | 70802 | 71301 | 2.32 | 1.35E-03 | transcription_start_site | + | 73869 | 73869 | -2817 | 12664 | AN2509 |
| 2030 | CONTIG42 | 68632 | 69141 | 0.93 | 1.97E-01 | transcription_start_site | + | 72109 | 72109 | -3222 | 12661 | AN2509 |
| 2030 | CONTIG42 | 68632 | 69141 | 0.93 | 1.97E-01 | transcription_start_site | + | 72478 | 72478 | -3591 | 12662 | AN2509 |
| 2030 | CONTIG42 | 68632 | 69141 | 0.93 | 1.97E-01 | transcription_start_site | + | 73735 | 73735 | -4848 | 12663 | AN2509 |
| 2030 | CONTIG42 | 68632 | 69141 | 0.93 | 1.97E-01 | transcription_start_site | + | 73869 | 73869 | -4982 | 12664 | AN2509 |
| 496  | CONTIG42 | 70802 | 71301 | 2.32 | 1.35E-03 | transcription_start_site | + | 76281 | 76281 | -5229 | 12665 | AN2510 |
| 1608 | CONTIG42 | 96466 | 96725 | 1.2  | 8.63E-02 | transcription_start_site | - | 96163 | 96163 | -432  | 12686 | AN2517 |
| 1608 | CONTIG42 | 96466 | 96725 | 1.2  | 8.63E-02 | transcription_start_site | - | 95774 | 95774 | -821  | 12687 | AN2517 |
| 1608 | CONTIG42 | 96466 | 96725 | 1.2  | 8.63E-02 | transcription_start_site | - | 95556 | 95556 | -1039 | 12688 | AN2517 |
| 1608 | CONTIG42 | 96466 | 96725 | 1.2  | 8.63E-02 | transcription_start_site | - | 95394 | 95394 | -1201 | 12689 | AN2517 |
| 1608 | CONTIG42 | 96466 | 96725 | 1.2  | 8.63E-02 | transcription_start_site | + | 97655 | 97655 | -1059 | 12690 | AN2518 |
| 1608 | CONTIG42 | 96466 | 96725 | 1.2  | 8.63E-02 | transcription_start_site | + | 97735 | 97735 | -1139 | 12691 | AN2518 |
| 1608 | CONTIG42 | 96466 | 96725 | 1.2  | 8.63E-02 | transcription_start_site | + | 98021 | 98021 | -1425 | 12692 | AN2518 |
| 1608 | CONTIG42 | 96466 | 96725 | 1.2  | 8.63E-02 | transcription_start_site | + | 98434 | 98434 | -1838 | 12693 | AN2518 |
| 728  | CONTIG43 | 10366 | 10850 | 2.01 | 1.20E-03 | transcription_start_site | - | 7518  | 7518  | -3090 | 12706 | AN2522 |
| 728  | CONTIG43 | 10366 | 10850 | 2.01 | 1.20E-03 | transcription_start_site | - | 7426  | 7426  | -3182 | 12707 | AN2522 |
| 728  | CONTIG43 | 10366 | 10850 | 2.01 | 1.20E-03 | transcription_start_site | + | 12355 | 12355 | -1747 | 12708 | AN2523 |
| 728  | CONTIG43 | 10366 | 10850 | 2.01 | 1.20E-03 | transcription_start_site | + | 12509 | 12509 | -1901 | 12709 | AN2523 |
| 728  | CONTIG43 | 10366 | 10850 | 2.01 | 1.20E-03 | transcription_start_site | + | 13049 | 13049 | -2441 | 12710 | AN2523 |
| 728  | CONTIG43 | 10366 | 10850 | 2.01 | 1.20E-03 | transcription_start_site | + | 13466 | 13466 | -2858 | 12711 | AN2523 |
| 728  | CONTIG43 | 10366 | 10850 | 2.01 | 1.20E-03 | transcription_start_site | + | 14367 | 14367 | -3759 | 12712 | AN2523 |
| 728  | CONTIG43 | 10366 | 10850 | 2.01 | 1.20E-03 | transcription_start_site | + | 15254 | 15254 | -4646 | 12713 | AN2523 |
| 2163 | CONTIG43 | 24393 | 25327 | 0.82 | 7.27E-02 | transcription_start_site | - | 23455 | 23455 | -1405 | 12714 | AN2525 |
| 2163 | CONTIG43 | 24393 | 25327 | 0.82 | 7.27E-02 | transcription_start_site | - | 23052 | 23052 | -1808 | 12715 | AN2525 |
| 2163 | CONTIG43 | 24393 | 25327 | 0.82 | 7.27E-02 | transcription_start_site | - | 24981 | 24981 | 121   | 12716 | AN2526 |
| 2163 | CONTIG43 | 24393 | 25327 | 0.82 | 7.27E-02 | transcription_start_site | + | 25785 | 25785 | -925  | 12717 | AN2527 |
| 666  | CONTIG43 | 37967 | 38241 | 2.08 | 1.62E-03 | transcription_start_site | - | 33742 | 33742 | -4362 | 12723 | AN2530 |
| 666  | CONTIG43 | 37967 | 38241 | 2.08 | 1.62E-03 | transcription_start_site | - | 37808 | 37808 | -296  | 12724 | AN2531 |
| 666  | CONTIG43 | 37967 | 38241 | 2.08 | 1.62E-03 | transcription_start_site | - | 37579 | 37579 | -525  | 12725 | AN2531 |
| 666  | CONTIG43 | 37967 | 38241 | 2.08 | 1.62E-03 | transcription_start_site | - | 37314 | 37314 | -790  | 12726 | AN2531 |
| 666  | CONTIG43 | 37967 | 38241 | 2.08 | 1.62E-03 | transcription_start_site | - | 37054 | 37054 | -1050 | 12727 | AN2531 |
| 666  | CONTIG43 | 37967 | 38241 | 2.08 | 1.62E-03 | transcription_start_site | - | 36841 | 36841 | -1263 | 12728 | AN2531 |
| 666  | CONTIG43 | 37967 | 38241 | 2.08 | 1.62E-03 | transcription_start_site | - | 36375 | 36375 | -1729 | 12729 | AN2531 |
| 666  | CONTIG43 | 37967 | 38241 | 2.08 | 1.62E-03 | transcription_start_site | + | 38873 | 38873 | -769  | 12730 | AN2532 |
| 666  | CONTIG43 | 37967 | 38241 | 2.08 | 1.62E-03 | transcription_start_site | + | 39262 | 39262 | -1158 | 12731 | AN2532 |
| 666  | CONTIG43 | 37967 | 38241 | 2.08 | 1.62E-03 | transcription_start_site | + | 39890 | 39890 | -1786 | 12732 | AN2532 |
| 666  | CONTIG43 | 37967 | 38241 | 2.08 | 1.62E-03 | transcription_start_site | + | 40909 | 40909 | -2805 | 12733 | AN2532 |
| 417  | CONTIG43 | 49067 | 49481 | 2.42 | 0.00E+00 | transcription_start_site | - | 45242 | 45242 | -4032 | 12734 | AN2533 |
| 417  | CONTIG43 | 49067 | 49481 | 2.42 | 0.00E+00 | transcription_start_site | - | 44894 | 44894 | -4380 | 12735 | AN2533 |
| 417  | CONTIG43 | 49067 | 49481 | 2.42 | 0.00E+00 | transcription_start_site | - | 44754 | 44754 | -4520 | 12736 | AN2533 |
| 417  | CONTIG43 | 49067 | 49481 | 2.42 | 0.00E+00 | transcription_start_site | - | 44257 | 44257 | -5017 | 12737 | AN2533 |
| 417  | CONTIG43 | 49067 | 49481 | 2.42 | 0.00E+00 | transcription_start_site | - | 48893 | 48893 | -381  | 12745 | AN2535 |
| 417  | CONTIG43 | 49067 | 49481 | 2.42 | 0.00E+00 | transcription_start_site | - | 48730 | 48730 | -544  | 12746 | AN2535 |

|      |          |        |        |      |          |                          |   |        |        |       |       |        |
|------|----------|--------|--------|------|----------|--------------------------|---|--------|--------|-------|-------|--------|
| 417  | CONTIG43 | 49067  | 49481  | 2.42 | 0.00E+00 | transcription_start_site | - | 48565  | 48565  | -709  | 12747 | AN2535 |
| 417  | CONTIG43 | 49067  | 49481  | 2.42 | 0.00E+00 | transcription_start_site | + | 52816  | 52816  | -3542 | 12748 | AN2537 |
| 417  | CONTIG43 | 49067  | 49481  | 2.42 | 0.00E+00 | transcription_start_site | + | 53157  | 53157  | -3883 | 12749 | AN2537 |
| 417  | CONTIG43 | 49067  | 49481  | 2.42 | 0.00E+00 | transcription_start_site | + | 53383  | 53383  | -4109 | 12750 | AN2537 |
| 417  | CONTIG43 | 49067  | 49481  | 2.42 | 0.00E+00 | transcription_start_site | + | 53729  | 53729  | -4455 | 12751 | AN2537 |
| 1617 | CONTIG43 | 54380  | 54804  | 1.19 | 5.36E-02 | transcription_start_site | + | 53729  | 53729  | 863   | 12751 | AN2537 |
| 1617 | CONTIG43 | 54380  | 54804  | 1.19 | 5.36E-02 | transcription_start_site | + | 53383  | 53383  | 1209  | 12750 | AN2537 |
| 1617 | CONTIG43 | 54380  | 54804  | 1.19 | 5.36E-02 | transcription_start_site | + | 55703  | 55703  | -1111 | 12752 | AN2538 |
| 1617 | CONTIG43 | 54380  | 54804  | 1.19 | 5.36E-02 | transcription_start_site | + | 56351  | 56351  | -1759 | 12753 | AN2538 |
| 1617 | CONTIG43 | 54380  | 54804  | 1.19 | 5.36E-02 | transcription_start_site | + | 56829  | 56829  | -2237 | 12754 | AN2538 |
| 1617 | CONTIG43 | 54380  | 54804  | 1.19 | 5.36E-02 | transcription_start_site | + | 59422  | 59422  | -4830 | 12757 | AN2540 |
| 1617 | CONTIG43 | 54380  | 54804  | 1.19 | 5.36E-02 | transcription_start_site | + | 59662  | 59662  | -5070 | 12758 | AN2540 |
| 1279 | CONTIG43 | 63535  | 63805  | 1.46 | 2.05E-02 | transcription_start_site | - | 62975  | 62975  | -695  | 12759 | AN2541 |
| 1279 | CONTIG43 | 63535  | 63805  | 1.46 | 2.05E-02 | transcription_start_site | - | 62526  | 62526  | -1144 | 12760 | AN2541 |
| 1279 | CONTIG43 | 63535  | 63805  | 1.46 | 2.05E-02 | transcription_start_site | - | 62276  | 62276  | -1394 | 12761 | AN2541 |
| 1279 | CONTIG43 | 63535  | 63805  | 1.46 | 2.05E-02 | transcription_start_site | + | 66790  | 66790  | -3120 | 12762 | AN2542 |
| 1279 | CONTIG43 | 63535  | 63805  | 1.46 | 2.05E-02 | transcription_start_site | + | 67312  | 67312  | -3642 | 12763 | AN2542 |
| 1279 | CONTIG43 | 63535  | 63805  | 1.46 | 2.05E-02 | transcription_start_site | + | 67645  | 67645  | -3975 | 12764 | AN2542 |
| 1618 | CONTIG43 | 108017 | 108375 | 1.19 | 5.36E-02 | transcription_start_site | - | 107805 | 107805 | -391  | 12779 | AN2547 |
| 1618 | CONTIG43 | 108017 | 108375 | 1.19 | 5.36E-02 | transcription_start_site | - | 107704 | 107704 | -492  | 12780 | AN2547 |
| 1618 | CONTIG43 | 108017 | 108375 | 1.19 | 5.36E-02 | transcription_start_site | - | 108766 | 108766 | 570   | 12778 | AN2547 |
| 1618 | CONTIG43 | 108017 | 108375 | 1.19 | 5.36E-02 | transcription_start_site | - | 108936 | 108936 | 740   | 12777 | AN2547 |
| 1618 | CONTIG43 | 108017 | 108375 | 1.19 | 5.36E-02 | transcription_start_site | - | 109310 | 109310 | 1114  | 12776 | AN2547 |
| 1618 | CONTIG43 | 108017 | 108375 | 1.19 | 5.36E-02 | transcription_start_site | + | 110267 | 110267 | -2071 | 12782 | AN2548 |
| 494  | CONTIG43 | 115369 | 115853 | 2.32 | 0.00E+00 | transcription_start_site | - | 114202 | 114202 | -1409 | 12783 | AN2549 |
| 494  | CONTIG43 | 115369 | 115853 | 2.32 | 0.00E+00 | transcription_start_site | - | 113861 | 113861 | -1750 | 12784 | AN2549 |
| 494  | CONTIG43 | 115369 | 115853 | 2.32 | 0.00E+00 | transcription_start_site | - | 113430 | 113430 | -2181 | 12785 | AN2549 |
| 494  | CONTIG43 | 115369 | 115853 | 2.32 | 0.00E+00 | transcription_start_site | - | 113138 | 113138 | -2473 | 12786 | AN2549 |
| 494  | CONTIG43 | 115369 | 115853 | 2.32 | 0.00E+00 | transcription_start_site | - | 112925 | 112925 | -2686 | 12787 | AN2549 |
| 494  | CONTIG43 | 115369 | 115853 | 2.32 | 0.00E+00 | transcription_start_site | - | 112534 | 112534 | -3077 | 12788 | AN2549 |
| 494  | CONTIG43 | 115369 | 115853 | 2.32 | 0.00E+00 | transcription_start_site | + | 117496 | 117496 | -1885 | 12789 | AN2550 |
| 494  | CONTIG43 | 115369 | 115853 | 2.32 | 0.00E+00 | transcription_start_site | + | 117742 | 117742 | -2131 | 12790 | AN2550 |
| 494  | CONTIG43 | 115369 | 115853 | 2.32 | 0.00E+00 | transcription_start_site | + | 117994 | 117994 | -2383 | 12791 | AN2550 |
| 494  | CONTIG43 | 115369 | 115853 | 2.32 | 0.00E+00 | transcription_start_site | + | 118441 | 118441 | -2830 | 12792 | AN2550 |
| 2088 | CONTIG43 | 138530 | 138804 | 0.89 | 1.54E-01 | transcription_start_site | - | 137614 | 137614 | -1053 | 12803 | AN2555 |
| 2088 | CONTIG43 | 138530 | 138804 | 0.89 | 1.54E-01 | transcription_start_site | - | 137346 | 137346 | -1321 | 12804 | AN2555 |
| 2088 | CONTIG43 | 138530 | 138804 | 0.89 | 1.54E-01 | transcription_start_site | - | 136974 | 136974 | -1693 | 12805 | AN2555 |
| 2088 | CONTIG43 | 138530 | 138804 | 0.89 | 1.54E-01 | transcription_start_site | - | 136682 | 136682 | -1985 | 12806 | AN2555 |
| 2088 | CONTIG43 | 138530 | 138804 | 0.89 | 1.54E-01 | transcription_start_site | + | 139246 | 139246 | -579  | 12807 | AN2556 |
| 2088 | CONTIG43 | 138530 | 138804 | 0.89 | 1.54E-01 | transcription_start_site | + | 139672 | 139672 | -1005 | 12808 | AN2556 |
| 1555 | CONTIG43 | 147305 | 147739 | 1.23 | 4.78E-02 | transcription_start_site | - | 148730 | 148730 | 1208  | 12816 | AN2559 |
| 1555 | CONTIG43 | 147305 | 147739 | 1.23 | 4.78E-02 | transcription_start_site | + | 150227 | 150227 | -2705 | 12817 | AN2560 |
| 1555 | CONTIG43 | 147305 | 147739 | 1.23 | 4.78E-02 | transcription_start_site | + | 150404 | 150404 | -2882 | 12818 | AN2560 |
| 1555 | CONTIG43 | 147305 | 147739 | 1.23 | 4.78E-02 | transcription_start_site | + | 151571 | 151571 | -4049 | 12819 | AN2560 |
| 1555 | CONTIG43 | 147305 | 147739 | 1.23 | 4.78E-02 | transcription_start_site | + | 152043 | 152043 | -4521 | 12820 | AN2560 |
| 1555 | CONTIG43 | 147305 | 147739 | 1.23 | 4.78E-02 | transcription_start_site | + | 152205 | 152205 | -4683 | 12821 | AN2560 |
| 545  | CONTIG43 | 171605 | 171893 | 2.25 | 3.81E-04 | transcription_start_site | - | 166658 | 166658 | -5091 | 12839 | AN2567 |
| 545  | CONTIG43 | 171605 | 171893 | 2.25 | 3.81E-04 | transcription_start_site | - | 170575 | 170575 | -1174 | 12844 | AN2569 |
| 545  | CONTIG43 | 171605 | 171893 | 2.25 | 3.81E-04 | transcription_start_site | - | 170320 | 170320 | -1429 | 12845 | AN2569 |
| 545  | CONTIG43 | 171605 | 171893 | 2.25 | 3.81E-04 | transcription_start_site | - | 170115 | 170115 | -1634 | 12846 | AN2569 |
| 545  | CONTIG43 | 171605 | 171893 | 2.25 | 3.81E-04 | transcription_start_site | - | 169935 | 169935 | -1814 | 12847 | AN2569 |
| 545  | CONTIG43 | 171605 | 171893 | 2.25 | 3.81E-04 | transcription_start_site | - | 169780 | 169780 | -1969 | 12848 | AN2569 |
| 545  | CONTIG43 | 171605 | 171893 | 2.25 | 3.81E-04 | transcription_start_site | - | 169500 | 169500 | -2249 | 12849 | AN2569 |
| 761  | CONTIG43 | 174310 | 174581 | 1.98 | 2.61E-03 | transcription_start_site | - | 170575 | 170575 | -3870 | 12844 | AN2569 |
| 761  | CONTIG43 | 174310 | 174581 | 1.98 | 2.61E-03 | transcription_start_site | - | 170320 | 170320 | -4125 | 12845 | AN2569 |
| 761  | CONTIG43 | 174310 | 174581 | 1.98 | 2.61E-03 | transcription_start_site | - | 170115 | 170115 | -4330 | 12846 | AN2569 |
| 761  | CONTIG43 | 174310 | 174581 | 1.98 | 2.61E-03 | transcription_start_site | - | 169935 | 169935 | -4510 | 12847 | AN2569 |



|      |          |        |        |      |          |                          |   |        |        |       |       |        |
|------|----------|--------|--------|------|----------|--------------------------|---|--------|--------|-------|-------|--------|
| 761  | CONTIG43 | 174310 | 174581 | 1.98 | 2.61E-03 | transcription_start_site | - | 169780 | 169780 | -4665 | 12848 | AN2569 |
| 761  | CONTIG43 | 174310 | 174581 | 1.98 | 2.61E-03 | transcription_start_site | - | 169500 | 169500 | -4945 | 12849 | AN2569 |
| 545  | CONTIG43 | 171605 | 171893 | 2.25 | 3.81E-04 | transcription_start_site | + | 172014 | 172014 | -265  | 12850 | AN2570 |
| 545  | CONTIG43 | 171605 | 171893 | 2.25 | 3.81E-04 | transcription_start_site | + | 172698 | 172698 | -949  | 12851 | AN2570 |
| 545  | CONTIG43 | 171605 | 171893 | 2.25 | 3.81E-04 | transcription_start_site | + | 174961 | 174961 | -3212 | 12852 | AN2571 |
| 761  | CONTIG43 | 174310 | 174581 | 1.98 | 2.61E-03 | transcription_start_site | + | 174961 | 174961 | -515  | 12852 | AN2571 |
| 761  | CONTIG43 | 174310 | 174581 | 1.98 | 2.61E-03 | transcription_start_site | + | 178374 | 178374 | -3928 | 12853 | AN2572 |
| 761  | CONTIG43 | 174310 | 174581 | 1.98 | 2.61E-03 | transcription_start_site | + | 178508 | 178508 | -4062 | 12854 | AN2572 |
| 761  | CONTIG43 | 174310 | 174581 | 1.98 | 2.61E-03 | transcription_start_site | + | 178643 | 178643 | -4197 | 12855 | AN2572 |
| 761  | CONTIG43 | 174310 | 174581 | 1.98 | 2.61E-03 | transcription_start_site | + | 178925 | 178925 | -4479 | 12856 | AN2572 |
| 1725 | CONTIG43 | 177977 | 178336 | 1.12 | 6.74E-02 | transcription_start_site | + | 178374 | 178374 | -217  | 12853 | AN2572 |
| 1725 | CONTIG43 | 177977 | 178336 | 1.12 | 6.74E-02 | transcription_start_site | + | 178508 | 178508 | -351  | 12854 | AN2572 |
| 1725 | CONTIG43 | 177977 | 178336 | 1.12 | 6.74E-02 | transcription_start_site | + | 178643 | 178643 | -486  | 12855 | AN2572 |
| 1725 | CONTIG43 | 177977 | 178336 | 1.12 | 6.74E-02 | transcription_start_site | + | 178925 | 178925 | -768  | 12856 | AN2572 |
| 1725 | CONTIG43 | 177977 | 178336 | 1.12 | 6.74E-02 | transcription_start_site | + | 179978 | 179978 | -1821 | 12857 | AN2572 |
| 1725 | CONTIG43 | 177977 | 178336 | 1.12 | 6.74E-02 | transcription_start_site | + | 180256 | 180256 | -2099 | 12858 | AN2572 |
| 1725 | CONTIG43 | 177977 | 178336 | 1.12 | 6.74E-02 | transcription_start_site | + | 180757 | 180757 | -2600 | 12859 | AN2572 |
| 2135 | CONTIG43 | 193426 | 194075 | 0.85 | 1.15E-01 | transcription_start_site | + | 192462 | 192462 | 1288  | 12866 | AN2574 |
| 2135 | CONTIG43 | 193426 | 194075 | 0.85 | 1.15E-01 | transcription_start_site | + | 194467 | 194467 | -716  | 12867 | AN2575 |
| 2135 | CONTIG43 | 193426 | 194075 | 0.85 | 1.15E-01 | transcription_start_site | + | 194804 | 194804 | -1053 | 12868 | AN2575 |
| 2135 | CONTIG43 | 193426 | 194075 | 0.85 | 1.15E-01 | transcription_start_site | + | 194891 | 194891 | -1140 | 12869 | AN2575 |
| 2135 | CONTIG43 | 193426 | 194075 | 0.85 | 1.15E-01 | transcription_start_site | + | 195048 | 195048 | -1297 | 12870 | AN2575 |
| 2135 | CONTIG43 | 193426 | 194075 | 0.85 | 1.15E-01 | transcription_start_site | + | 195688 | 195688 | -1937 | 12871 | AN2575 |
| 2135 | CONTIG43 | 193426 | 194075 | 0.85 | 1.15E-01 | transcription_start_site | + | 196160 | 196160 | -2409 | 12872 | AN2575 |
| 2135 | CONTIG43 | 193426 | 194075 | 0.85 | 1.15E-01 | transcription_start_site | + | 196603 | 196603 | -2852 | 12873 | AN2576 |
| 2135 | CONTIG43 | 193426 | 194075 | 0.85 | 1.15E-01 | transcription_start_site | + | 198128 | 198128 | -4377 | 12874 | AN2576 |
| 418  | CONTIG43 | 216844 | 217478 | 2.42 | 0.00E+00 | transcription_start_site | + | 217545 | 217545 | -384  | 12889 | AN2581 |
| 418  | CONTIG43 | 216844 | 217478 | 2.42 | 0.00E+00 | transcription_start_site | + | 217675 | 217675 | -514  | 12890 | AN2581 |
| 418  | CONTIG43 | 216844 | 217478 | 2.42 | 0.00E+00 | transcription_start_site | + | 221329 | 221329 | -4168 | 12891 | AN2581 |
| 544  | CONTIG43 | 234001 | 234590 | 2.25 | 0.00E+00 | transcription_start_site | - | 233431 | 233431 | -864  | 12899 | AN2585 |
| 544  | CONTIG43 | 234001 | 234590 | 2.25 | 0.00E+00 | transcription_start_site | - | 232191 | 232191 | -2104 | 12900 | AN2585 |
| 544  | CONTIG43 | 234001 | 234590 | 2.25 | 0.00E+00 | transcription_start_site | - | 232055 | 232055 | -2240 | 12901 | AN2585 |
| 106  | CONTIG43 | 262362 | 262937 | 3.07 | 0.00E+00 | transcription_start_site | - | 258243 | 258243 | -4406 | 12935 | AN2595 |
| 106  | CONTIG43 | 262362 | 262937 | 3.07 | 0.00E+00 | transcription_start_site | - | 257848 | 257848 | -4801 | 12936 | AN2595 |
| 106  | CONTIG43 | 262362 | 262937 | 3.07 | 0.00E+00 | transcription_start_site | - | 262055 | 262055 | -594  | 12937 | AN2596 |
| 106  | CONTIG43 | 262362 | 262937 | 3.07 | 0.00E+00 | transcription_start_site | - | 261675 | 261675 | -974  | 12938 | AN2596 |
| 106  | CONTIG43 | 262362 | 262937 | 3.07 | 0.00E+00 | transcription_start_site | - | 261279 | 261279 | -1370 | 12939 | AN2596 |
| 106  | CONTIG43 | 262362 | 262937 | 3.07 | 0.00E+00 | transcription_start_site | - | 261126 | 261126 | -1523 | 12940 | AN2596 |
| 106  | CONTIG43 | 262362 | 262937 | 3.07 | 0.00E+00 | transcription_start_site | - | 260929 | 260929 | -1720 | 12941 | AN2596 |
| 106  | CONTIG43 | 262362 | 262937 | 3.07 | 0.00E+00 | transcription_start_site | - | 260548 | 260548 | -2101 | 12942 | AN2596 |
| 106  | CONTIG43 | 262362 | 262937 | 3.07 | 0.00E+00 | transcription_start_site | - | 260167 | 260167 | -2482 | 12943 | AN2596 |
| 106  | CONTIG43 | 262362 | 262937 | 3.07 | 0.00E+00 | transcription_start_site | + | 263523 | 263523 | -873  | 12944 | AN2597 |
| 106  | CONTIG43 | 262362 | 262937 | 3.07 | 0.00E+00 | transcription_start_site | + | 263678 | 263678 | -1028 | 12945 | AN2597 |
| 1986 | CONTIG43 | 276229 | 276584 | 0.95 | 1.22E-01 | transcription_start_site | - | 272132 | 272132 | -4274 | 12957 | AN2599 |
| 1986 | CONTIG43 | 276229 | 276584 | 0.95 | 1.22E-01 | transcription_start_site | - | 271953 | 271953 | -4453 | 12958 | AN2599 |
| 1986 | CONTIG43 | 276229 | 276584 | 0.95 | 1.22E-01 | transcription_start_site | - | 271577 | 271577 | -4829 | 12959 | AN2599 |
| 1986 | CONTIG43 | 276229 | 276584 | 0.95 | 1.22E-01 | transcription_start_site | - | 273377 | 273377 | -3029 | 12962 | AN2600 |
| 1986 | CONTIG43 | 276229 | 276584 | 0.95 | 1.22E-01 | transcription_start_site | - | 273279 | 273279 | -3127 | 12963 | AN2600 |
| 1986 | CONTIG43 | 276229 | 276584 | 0.95 | 1.22E-01 | transcription_start_site | - | 273065 | 273065 | -3341 | 12964 | AN2600 |
| 1986 | CONTIG43 | 276229 | 276584 | 0.95 | 1.22E-01 | transcription_start_site | - | 272875 | 272875 | -3531 | 12965 | AN2600 |
| 1986 | CONTIG43 | 276229 | 276584 | 0.95 | 1.22E-01 | transcription_start_site | - | 275476 | 275476 | -930  | 12966 | AN2601 |
| 1986 | CONTIG43 | 276229 | 276584 | 0.95 | 1.22E-01 | transcription_start_site | - | 275203 | 275203 | -1203 | 12967 | AN2601 |
| 1986 | CONTIG43 | 276229 | 276584 | 0.95 | 1.22E-01 | transcription_start_site | - | 274669 | 274669 | -1737 | 12968 | AN2601 |
| 1986 | CONTIG43 | 276229 | 276584 | 0.95 | 1.22E-01 | transcription_start_site | - | 274281 | 274281 | -2125 | 12969 | AN2601 |
| 1986 | CONTIG43 | 276229 | 276584 | 0.95 | 1.22E-01 | transcription_start_site | + | 279698 | 279698 | -3291 | 12970 | AN2602 |
| 1986 | CONTIG43 | 276229 | 276584 | 0.95 | 1.22E-01 | transcription_start_site | + | 280421 | 280421 | -4014 | 12971 | AN2602 |
| 1986 | CONTIG43 | 276229 | 276584 | 0.95 | 1.22E-01 | transcription_start_site | + | 280970 | 280970 | -4563 | 12972 | AN2602 |

|      |          |        |        |      |          |                          |   |        |        |       |       |        |
|------|----------|--------|--------|------|----------|--------------------------|---|--------|--------|-------|-------|--------|
| 1986 | CONTIG43 | 276229 | 276584 | 0.95 | 1.22E-01 | transcription_start_site | + | 281090 | 281090 | -4683 | 12973 | AN2602 |
| 1339 | CONTIG43 | 309455 | 310489 | 1.4  | 2.55E-03 | transcription_start_site | - | 305543 | 305543 | -4429 | 12995 | AN2609 |
| 1339 | CONTIG43 | 309455 | 310489 | 1.4  | 2.55E-03 | transcription_start_site | - | 305285 | 305285 | -4687 | 12996 | AN2609 |
| 1339 | CONTIG43 | 309455 | 310489 | 1.4  | 2.55E-03 | transcription_start_site | - | 305101 | 305101 | -4871 | 12997 | AN2609 |
| 1339 | CONTIG43 | 309455 | 310489 | 1.4  | 2.55E-03 | transcription_start_site | - | 304913 | 304913 | -5059 | 12998 | AN2609 |
| 1339 | CONTIG43 | 309455 | 310489 | 1.4  | 2.55E-03 | transcription_start_site | - | 309412 | 309412 | -560  | 12999 | AN2610 |
| 1339 | CONTIG43 | 309455 | 310489 | 1.4  | 2.55E-03 | transcription_start_site | - | 309014 | 309014 | -958  | 13000 | AN2610 |
| 1339 | CONTIG43 | 309455 | 310489 | 1.4  | 2.55E-03 | transcription_start_site | - | 308707 | 308707 | -1265 | 13001 | AN2610 |
| 1339 | CONTIG43 | 309455 | 310489 | 1.4  | 2.55E-03 | transcription_start_site | - | 308520 | 308520 | -1452 | 13002 | AN2610 |
| 1981 | CONTIG43 | 312237 | 312656 | 0.95 | 7.38E-02 | transcription_start_site | - | 309412 | 309412 | -3034 | 12999 | AN2610 |
| 1981 | CONTIG43 | 312237 | 312656 | 0.95 | 7.38E-02 | transcription_start_site | - | 309014 | 309014 | -3432 | 13000 | AN2610 |
| 1981 | CONTIG43 | 312237 | 312656 | 0.95 | 7.38E-02 | transcription_start_site | - | 308707 | 308707 | -3739 | 13001 | AN2610 |
| 1981 | CONTIG43 | 312237 | 312656 | 0.95 | 7.38E-02 | transcription_start_site | - | 308520 | 308520 | -3926 | 13002 | AN2610 |
| 2242 | CONTIG43 | 310965 | 312060 | 0.75 | 9.43E-02 | transcription_start_site | - | 309412 | 309412 | -2100 | 12999 | AN2610 |
| 2242 | CONTIG43 | 310965 | 312060 | 0.75 | 9.43E-02 | transcription_start_site | - | 309014 | 309014 | -2498 | 13000 | AN2610 |
| 2242 | CONTIG43 | 310965 | 312060 | 0.75 | 9.43E-02 | transcription_start_site | - | 308707 | 308707 | -2805 | 13001 | AN2610 |
| 2242 | CONTIG43 | 310965 | 312060 | 0.75 | 9.43E-02 | transcription_start_site | - | 308520 | 308520 | -2992 | 13002 | AN2610 |
| 1344 | CONTIG43 | 317026 | 317468 | 1.4  | 2.63E-02 | transcription_start_site | - | 315713 | 315713 | -1534 | 13003 | AN2611 |
| 1344 | CONTIG43 | 317026 | 317468 | 1.4  | 2.63E-02 | transcription_start_site | - | 315342 | 315342 | -1905 | 13004 | AN2611 |
| 1344 | CONTIG43 | 317026 | 317468 | 1.4  | 2.63E-02 | transcription_start_site | - | 314977 | 314977 | -2270 | 13005 | AN2611 |
| 1344 | CONTIG43 | 317026 | 317468 | 1.4  | 2.63E-02 | transcription_start_site | - | 314202 | 314202 | -3045 | 13006 | AN2611 |
| 1344 | CONTIG43 | 317026 | 317468 | 1.4  | 2.63E-02 | transcription_start_site | - | 314031 | 314031 | -3216 | 13007 | AN2611 |
| 1344 | CONTIG43 | 317026 | 317468 | 1.4  | 2.63E-02 | transcription_start_site | - | 313083 | 313083 | -4164 | 13008 | AN2611 |
| 1344 | CONTIG43 | 317026 | 317468 | 1.4  | 2.63E-02 | transcription_start_site | - | 312933 | 312933 | -4314 | 13009 | AN2611 |
| 1345 | CONTIG43 | 319133 | 319487 | 1.4  | 2.63E-02 | transcription_start_site | - | 315713 | 315713 | -3597 | 13003 | AN2611 |
| 1345 | CONTIG43 | 319133 | 319487 | 1.4  | 2.63E-02 | transcription_start_site | - | 315342 | 315342 | -3968 | 13004 | AN2611 |
| 1345 | CONTIG43 | 319133 | 319487 | 1.4  | 2.63E-02 | transcription_start_site | - | 314977 | 314977 | -4333 | 13005 | AN2611 |
| 1345 | CONTIG43 | 319133 | 319487 | 1.4  | 2.63E-02 | transcription_start_site | - | 314202 | 314202 | -5108 | 13006 | AN2611 |
| 1981 | CONTIG43 | 312237 | 312656 | 0.95 | 7.38E-02 | transcription_start_site | - | 312933 | 312933 | 486   | 13009 | AN2611 |
| 1981 | CONTIG43 | 312237 | 312656 | 0.95 | 7.38E-02 | transcription_start_site | - | 313083 | 313083 | 636   | 13008 | AN2611 |
| 2242 | CONTIG43 | 310965 | 312060 | 0.75 | 9.43E-02 | transcription_start_site | - | 312933 | 312933 | 1420  | 13009 | AN2611 |
| 2243 | CONTIG43 | 320183 | 321502 | 0.75 | 9.43E-02 | transcription_start_site | - | 315713 | 315713 | -5129 | 13003 | AN2611 |
| 2243 | CONTIG43 | 320183 | 321502 | 0.75 | 9.43E-02 | transcription_start_site | - | 315342 | 315342 | -5500 | 13004 | AN2611 |
| 1345 | CONTIG43 | 319133 | 319487 | 1.4  | 2.63E-02 | transcription_start_site | - | 318622 | 318622 | -688  | 13013 | AN2612 |
| 1345 | CONTIG43 | 319133 | 319487 | 1.4  | 2.63E-02 | transcription_start_site | - | 320118 | 320118 | 808   | 13012 | AN2612 |
| 1925 | CONTIG43 | 324603 | 325028 | 0.99 | 1.08E-01 | transcription_start_site | - | 320931 | 320931 | -3884 | 13010 | AN2612 |
| 1925 | CONTIG43 | 324603 | 325028 | 0.99 | 1.08E-01 | transcription_start_site | - | 320784 | 320784 | -4031 | 13011 | AN2612 |
| 1925 | CONTIG43 | 324603 | 325028 | 0.99 | 1.08E-01 | transcription_start_site | - | 320118 | 320118 | -4697 | 13012 | AN2612 |
| 2243 | CONTIG43 | 320183 | 321502 | 0.75 | 9.43E-02 | transcription_start_site | - | 320784 | 320784 | -58   | 13011 | AN2612 |
| 2243 | CONTIG43 | 320183 | 321502 | 0.75 | 9.43E-02 | transcription_start_site | - | 320931 | 320931 | 88    | 13010 | AN2612 |
| 2243 | CONTIG43 | 320183 | 321502 | 0.75 | 9.43E-02 | transcription_start_site | - | 320118 | 320118 | -724  | 13012 | AN2612 |
| 2243 | CONTIG43 | 320183 | 321502 | 0.75 | 9.43E-02 | transcription_start_site | - | 318622 | 318622 | -2220 | 13013 | AN2612 |
| 1344 | CONTIG43 | 317026 | 317468 | 1.4  | 2.63E-02 | transcription_start_site | + | 321553 | 321553 | -4306 | 13014 | AN2613 |
| 1344 | CONTIG43 | 317026 | 317468 | 1.4  | 2.63E-02 | transcription_start_site | + | 321896 | 321896 | -4649 | 13015 | AN2613 |
| 1344 | CONTIG43 | 317026 | 317468 | 1.4  | 2.63E-02 | transcription_start_site | + | 322457 | 322457 | -5210 | 13016 | AN2613 |
| 1345 | CONTIG43 | 319133 | 319487 | 1.4  | 2.63E-02 | transcription_start_site | + | 321553 | 321553 | -2243 | 13014 | AN2613 |
| 1345 | CONTIG43 | 319133 | 319487 | 1.4  | 2.63E-02 | transcription_start_site | + | 321896 | 321896 | -2586 | 13015 | AN2613 |
| 1345 | CONTIG43 | 319133 | 319487 | 1.4  | 2.63E-02 | transcription_start_site | + | 322457 | 322457 | -3147 | 13016 | AN2613 |
| 2243 | CONTIG43 | 320183 | 321502 | 0.75 | 9.43E-02 | transcription_start_site | + | 321553 | 321553 | -710  | 13014 | AN2613 |
| 2243 | CONTIG43 | 320183 | 321502 | 0.75 | 9.43E-02 | transcription_start_site | + | 321896 | 321896 | -1053 | 13015 | AN2613 |
| 2243 | CONTIG43 | 320183 | 321502 | 0.75 | 9.43E-02 | transcription_start_site | + | 322457 | 322457 | -1614 | 13016 | AN2613 |
| 1925 | CONTIG43 | 324603 | 325028 | 0.99 | 1.08E-01 | transcription_start_site | + | 325250 | 325250 | -434  | 13017 | AN2614 |
| 1925 | CONTIG43 | 324603 | 325028 | 0.99 | 1.08E-01 | transcription_start_site | + | 325356 | 325356 | -540  | 13018 | AN2614 |
| 1925 | CONTIG43 | 324603 | 325028 | 0.99 | 1.08E-01 | transcription_start_site | + | 325526 | 325526 | -710  | 13019 | AN2614 |
| 1925 | CONTIG43 | 324603 | 325028 | 0.99 | 1.08E-01 | transcription_start_site | + | 325935 | 325935 | -1119 | 13020 | AN2614 |
| 1925 | CONTIG43 | 324603 | 325028 | 0.99 | 1.08E-01 | transcription_start_site | + | 326128 | 326128 | -1312 | 13021 | AN2614 |
| 2243 | CONTIG43 | 320183 | 321502 | 0.75 | 9.43E-02 | transcription_start_site | + | 325250 | 325250 | -4407 | 13017 | AN2614 |

|      |          |        |        |      |          |                          |   |        |        |       |       |        |
|------|----------|--------|--------|------|----------|--------------------------|---|--------|--------|-------|-------|--------|
| 2243 | CONTIG43 | 320183 | 321502 | 0.75 | 9.43E-02 | transcription_start_site | + | 325356 | 325356 | -4513 | 13018 | AN2614 |
| 2243 | CONTIG43 | 320183 | 321502 | 0.75 | 9.43E-02 | transcription_start_site | + | 325526 | 325526 | -4683 | 13019 | AN2614 |
| 2243 | CONTIG43 | 320183 | 321502 | 0.75 | 9.43E-02 | transcription_start_site | + | 325935 | 325935 | -5092 | 13020 | AN2614 |
| 2243 | CONTIG43 | 320183 | 321502 | 0.75 | 9.43E-02 | transcription_start_site | + | 326128 | 326128 | -5285 | 13021 | AN2614 |
| 1925 | CONTIG43 | 324603 | 325028 | 0.99 | 1.08E-01 | transcription_start_site | + | 329674 | 329674 | -4858 | 13022 | AN2615 |
| 1810 | CONTIG45 | 29036  | 29310  | 1.06 | 2.05E-02 | transcription_start_site | - | 26703  | 26703  | -2470 | 13050 | AN2621 |
| 1810 | CONTIG45 | 29036  | 29310  | 1.06 | 2.05E-02 | transcription_start_site | + | 29384  | 29384  | -211  | 13052 | AN2623 |
| 1810 | CONTIG45 | 29036  | 29310  | 1.06 | 2.05E-02 | transcription_start_site | + | 29473  | 29473  | -300  | 13053 | AN2623 |
| 1810 | CONTIG45 | 29036  | 29310  | 1.06 | 2.05E-02 | transcription_start_site | + | 29703  | 29703  | -530  | 13054 | AN2623 |
| 1810 | CONTIG45 | 29036  | 29310  | 1.06 | 2.05E-02 | transcription_start_site | + | 29914  | 29914  | -741  | 13055 | AN2623 |
| 921  | CONTIG45 | 43293  | 43702  | 1.8  | 0.00E+00 | transcription_start_site | - | 42339  | 42339  | -1158 | 13063 | AN2626 |
| 921  | CONTIG45 | 43293  | 43702  | 1.8  | 0.00E+00 | transcription_start_site | - | 42115  | 42115  | -1382 | 13064 | AN2626 |
| 921  | CONTIG45 | 43293  | 43702  | 1.8  | 0.00E+00 | transcription_start_site | - | 41683  | 41683  | -1814 | 13065 | AN2626 |
| 488  | CONTIG46 | 8626   | 9127   | 2.33 | 7.31E-04 | transcription_start_site | - | 5274   | 5274   | -3602 | 13092 | AN2637 |
| 488  | CONTIG46 | 8626   | 9127   | 2.33 | 7.31E-04 | transcription_start_site | - | 8360   | 8360   | -516  | 13093 | AN2638 |
| 488  | CONTIG46 | 8626   | 9127   | 2.33 | 7.31E-04 | transcription_start_site | - | 8022   | 8022   | -854  | 13094 | AN2638 |
| 488  | CONTIG46 | 8626   | 9127   | 2.33 | 7.31E-04 | transcription_start_site | + | 9779   | 9779   | -902  | 13095 | AN2639 |
| 488  | CONTIG46 | 8626   | 9127   | 2.33 | 7.31E-04 | transcription_start_site | + | 9876   | 9876   | -999  | 13096 | AN2639 |
| 488  | CONTIG46 | 8626   | 9127   | 2.33 | 7.31E-04 | transcription_start_site | + | 10545  | 10545  | -1668 | 13097 | AN2639 |
| 488  | CONTIG46 | 8626   | 9127   | 2.33 | 7.31E-04 | transcription_start_site | + | 11716  | 11716  | -2839 | 13098 | AN2640 |
| 1233 | CONTIG46 | 23417  | 23761  | 1.5  | 3.01E-02 | transcription_start_site | - | 19972  | 19972  | -3617 | 13099 | AN2642 |
| 1233 | CONTIG46 | 23417  | 23761  | 1.5  | 3.01E-02 | transcription_start_site | - | 19814  | 19814  | -3775 | 13100 | AN2642 |
| 1233 | CONTIG46 | 23417  | 23761  | 1.5  | 3.01E-02 | transcription_start_site | - | 19598  | 19598  | -3991 | 13101 | AN2642 |
| 1233 | CONTIG46 | 23417  | 23761  | 1.5  | 3.01E-02 | transcription_start_site | - | 19332  | 19332  | -4257 | 13102 | AN2642 |
| 1233 | CONTIG46 | 23417  | 23761  | 1.5  | 3.01E-02 | transcription_start_site | - | 19067  | 19067  | -4522 | 13103 | AN2642 |
| 1233 | CONTIG46 | 23417  | 23761  | 1.5  | 3.01E-02 | transcription_start_site | - | 23240  | 23240  | -349  | 13104 | AN2643 |
| 1233 | CONTIG46 | 23417  | 23761  | 1.5  | 3.01E-02 | transcription_start_site | - | 22963  | 22963  | -626  | 13105 | AN2643 |
| 1233 | CONTIG46 | 23417  | 23761  | 1.5  | 3.01E-02 | transcription_start_site | - | 22385  | 22385  | -1204 | 13106 | AN2643 |
| 1233 | CONTIG46 | 23417  | 23761  | 1.5  | 3.01E-02 | transcription_start_site | - | 22154  | 22154  | -1435 | 13107 | AN2643 |
| 1233 | CONTIG46 | 23417  | 23761  | 1.5  | 3.01E-02 | transcription_start_site | - | 21730  | 21730  | -1859 | 13108 | AN2643 |
| 1233 | CONTIG46 | 23417  | 23761  | 1.5  | 3.01E-02 | transcription_start_site | + | 23759  | 23759  | -170  | 13109 | AN2644 |
| 1233 | CONTIG46 | 23417  | 23761  | 1.5  | 3.01E-02 | transcription_start_site | + | 25421  | 25421  | -1832 | 13110 | AN2644 |
| 1233 | CONTIG46 | 23417  | 23761  | 1.5  | 3.01E-02 | transcription_start_site | + | 26758  | 26758  | -3169 | 13111 | AN2645 |
| 1233 | CONTIG46 | 23417  | 23761  | 1.5  | 3.01E-02 | transcription_start_site | + | 26947  | 26947  | -3358 | 13112 | AN2645 |
| 1233 | CONTIG46 | 23417  | 23761  | 1.5  | 3.01E-02 | transcription_start_site | + | 27382  | 27382  | -3793 | 13113 | AN2645 |
| 1233 | CONTIG46 | 23417  | 23761  | 1.5  | 3.01E-02 | transcription_start_site | + | 27616  | 27616  | -4027 | 13114 | AN2645 |
| 237  | CONTIG46 | 37805  | 38084  | 2.74 | 0.00E+00 | transcription_start_site | - | 37101  | 37101  | -843  | 13130 | AN2648 |
| 237  | CONTIG46 | 37805  | 38084  | 2.74 | 0.00E+00 | transcription_start_site | - | 36785  | 36785  | -1159 | 13131 | AN2648 |
| 237  | CONTIG46 | 37805  | 38084  | 2.74 | 0.00E+00 | transcription_start_site | - | 36530  | 36530  | -1414 | 13132 | AN2648 |
| 237  | CONTIG46 | 37805  | 38084  | 2.74 | 0.00E+00 | transcription_start_site | + | 38445  | 38445  | -500  | 13133 | AN2649 |
| 237  | CONTIG46 | 37805  | 38084  | 2.74 | 0.00E+00 | transcription_start_site | + | 38652  | 38652  | -707  | 13134 | AN2649 |
| 237  | CONTIG46 | 37805  | 38084  | 2.74 | 0.00E+00 | transcription_start_site | + | 39101  | 39101  | -1156 | 13135 | AN2649 |
| 237  | CONTIG46 | 37805  | 38084  | 2.74 | 0.00E+00 | transcription_start_site | + | 39889  | 39889  | -1944 | 13136 | AN2649 |
| 237  | CONTIG46 | 37805  | 38084  | 2.74 | 0.00E+00 | transcription_start_site | + | 40077  | 40077  | -2132 | 13137 | AN2649 |
| 2071 | CONTIG46 | 61063  | 61402  | 0.9  | 1.34E-01 | transcription_start_site | - | 59557  | 59557  | -1675 | 13169 | AN2657 |
| 2071 | CONTIG46 | 61063  | 61402  | 0.9  | 1.34E-01 | transcription_start_site | - | 58604  | 58604  | -2628 | 13170 | AN2657 |
| 2349 | CONTIG46 | 59478  | 60432  | 0.56 | 1.75E-01 | transcription_start_site | - | 59557  | 59557  | -398  | 13169 | AN2657 |
| 2349 | CONTIG46 | 59478  | 60432  | 0.56 | 1.75E-01 | transcription_start_site | - | 58604  | 58604  | -1351 | 13170 | AN2657 |
| 2071 | CONTIG46 | 61063  | 61402  | 0.9  | 1.34E-01 | transcription_start_site | - | 61182  | 61182  | -50   | 13174 | AN2658 |
| 2071 | CONTIG46 | 61063  | 61402  | 0.9  | 1.34E-01 | transcription_start_site | - | 60715  | 60715  | -517  | 13175 | AN2658 |
| 2071 | CONTIG46 | 61063  | 61402  | 0.9  | 1.34E-01 | transcription_start_site | - | 61778  | 61778  | 545   | 13173 | AN2658 |
| 2071 | CONTIG46 | 61063  | 61402  | 0.9  | 1.34E-01 | transcription_start_site | - | 60487  | 60487  | -745  | 13176 | AN2658 |
| 2071 | CONTIG46 | 61063  | 61402  | 0.9  | 1.34E-01 | transcription_start_site | - | 62042  | 62042  | 809   | 13172 | AN2658 |
| 2071 | CONTIG46 | 61063  | 61402  | 0.9  | 1.34E-01 | transcription_start_site | - | 60178  | 60178  | -1054 | 13177 | AN2658 |
| 2071 | CONTIG46 | 61063  | 61402  | 0.9  | 1.34E-01 | transcription_start_site | - | 62290  | 62290  | 1057  | 13171 | AN2658 |
| 2349 | CONTIG46 | 59478  | 60432  | 0.56 | 1.75E-01 | transcription_start_site | - | 60178  | 60178  | 223   | 13177 | AN2658 |
| 2349 | CONTIG46 | 59478  | 60432  | 0.56 | 1.75E-01 | transcription_start_site | - | 60487  | 60487  | 532   | 13176 | AN2658 |

|      |          |       |       |      |          |                          |   |       |       |       |       |        |
|------|----------|-------|-------|------|----------|--------------------------|---|-------|-------|-------|-------|--------|
| 2349 | CONTIG46 | 59478 | 60432 | 0.56 | 1.75E-01 | transcription_start_site | - | 60715 | 60715 | 760   | 13175 | AN2658 |
| 2349 | CONTIG46 | 59478 | 60432 | 0.56 | 1.75E-01 | transcription_start_site | - | 61182 | 61182 | 1227  | 13174 | AN2658 |
| 2071 | CONTIG46 | 61063 | 61402 | 0.9  | 1.34E-01 | transcription_start_site | + | 63543 | 63543 | -2310 | 13178 | AN2659 |
| 2071 | CONTIG46 | 61063 | 61402 | 0.9  | 1.34E-01 | transcription_start_site | + | 63940 | 63940 | -2707 | 13179 | AN2659 |
| 2071 | CONTIG46 | 61063 | 61402 | 0.9  | 1.34E-01 | transcription_start_site | + | 64908 | 64908 | -3675 | 13180 | AN2659 |
| 2071 | CONTIG46 | 61063 | 61402 | 0.9  | 1.34E-01 | transcription_start_site | + | 65020 | 65020 | -3787 | 13181 | AN2659 |
| 2349 | CONTIG46 | 59478 | 60432 | 0.56 | 1.75E-01 | transcription_start_site | + | 63543 | 63543 | -3588 | 13178 | AN2659 |
| 2349 | CONTIG46 | 59478 | 60432 | 0.56 | 1.75E-01 | transcription_start_site | + | 63940 | 63940 | -3985 | 13179 | AN2659 |
| 2349 | CONTIG46 | 59478 | 60432 | 0.56 | 1.75E-01 | transcription_start_site | + | 64908 | 64908 | -4953 | 13180 | AN2659 |
| 2349 | CONTIG46 | 59478 | 60432 | 0.56 | 1.75E-01 | transcription_start_site | + | 65020 | 65020 | -5065 | 13181 | AN2659 |
| 2005 | CONTIG46 | 86494 | 87208 | 0.94 | 1.15E-01 | transcription_start_site | - | 86317 | 86317 | -534  | 13205 | AN2665 |
| 2005 | CONTIG46 | 86494 | 87208 | 0.94 | 1.15E-01 | transcription_start_site | - | 86040 | 86040 | -811  | 13206 | AN2665 |
| 2005 | CONTIG46 | 86494 | 87208 | 0.94 | 1.15E-01 | transcription_start_site | - | 85295 | 85295 | -1556 | 13207 | AN2665 |
| 2005 | CONTIG46 | 86494 | 87208 | 0.94 | 1.15E-01 | transcription_start_site | - | 85000 | 85000 | -1851 | 13208 | AN2665 |
| 2005 | CONTIG46 | 86494 | 87208 | 0.94 | 1.15E-01 | transcription_start_site | - | 84500 | 84500 | -2351 | 13209 | AN2665 |
| 2005 | CONTIG46 | 86494 | 87208 | 0.94 | 1.15E-01 | transcription_start_site | - | 84418 | 84418 | -2433 | 13210 | AN2665 |
| 2005 | CONTIG46 | 86494 | 87208 | 0.94 | 1.15E-01 | transcription_start_site | + | 86818 | 86818 | 33    | 13212 | AN2666 |
| 2005 | CONTIG46 | 86494 | 87208 | 0.94 | 1.15E-01 | transcription_start_site | + | 86759 | 86759 | 92    | 13211 | AN2666 |
| 2005 | CONTIG46 | 86494 | 87208 | 0.94 | 1.15E-01 | transcription_start_site | + | 87009 | 87009 | -158  | 13213 | AN2666 |
| 848  | CONTIG46 | 93534 | 93956 | 1.88 | 9.32E-03 | transcription_start_site | - | 90495 | 90495 | -3250 | 13214 | AN2667 |
| 848  | CONTIG46 | 93534 | 93956 | 1.88 | 9.32E-03 | transcription_start_site | - | 90278 | 90278 | -3467 | 13215 | AN2667 |
| 848  | CONTIG46 | 93534 | 93956 | 1.88 | 9.32E-03 | transcription_start_site | - | 92496 | 92496 | -1249 | 13217 | AN2668 |
| 848  | CONTIG46 | 93534 | 93956 | 1.88 | 9.32E-03 | transcription_start_site | - | 92311 | 92311 | -1434 | 13218 | AN2668 |
| 848  | CONTIG46 | 93534 | 93956 | 1.88 | 9.32E-03 | transcription_start_site | - | 92109 | 92109 | -1636 | 13219 | AN2668 |
| 848  | CONTIG46 | 93534 | 93956 | 1.88 | 9.32E-03 | transcription_start_site | - | 91983 | 91983 | -1762 | 13220 | AN2668 |
| 848  | CONTIG46 | 93534 | 93956 | 1.88 | 9.32E-03 | transcription_start_site | - | 91524 | 91524 | -2221 | 13221 | AN2668 |
| 848  | CONTIG46 | 93534 | 93956 | 1.88 | 9.32E-03 | transcription_start_site | - | 91295 | 91295 | -2450 | 13222 | AN2668 |
| 848  | CONTIG46 | 93534 | 93956 | 1.88 | 9.32E-03 | transcription_start_site | + | 95591 | 95591 | -1846 | 13223 | AN2669 |
| 2161 | CONTIG47 | 6771  | 7100  | 0.82 | 6.74E-02 | transcription_start_site | - | 5155  | 5155  | -1780 | 13227 | AN2671 |
| 2161 | CONTIG47 | 6771  | 7100  | 0.82 | 6.74E-02 | transcription_start_site | - | 4343  | 4343  | -2592 | 13228 | AN2671 |
| 2161 | CONTIG47 | 6771  | 7100  | 0.82 | 6.74E-02 | transcription_start_site | - | 3868  | 3868  | -3067 | 13229 | AN2671 |
| 2351 | CONTIG47 | 7141  | 8000  | 0.55 | 1.81E-01 | transcription_start_site | - | 5155  | 5155  | -2415 | 13227 | AN2671 |
| 2351 | CONTIG47 | 7141  | 8000  | 0.55 | 1.81E-01 | transcription_start_site | - | 4343  | 4343  | -3227 | 13228 | AN2671 |
| 2351 | CONTIG47 | 7141  | 8000  | 0.55 | 1.81E-01 | transcription_start_site | - | 3868  | 3868  | -3702 | 13229 | AN2671 |
| 2351 | CONTIG47 | 7141  | 8000  | 0.55 | 1.81E-01 | transcription_start_site | - | 8697  | 8697  | 1126  | 13234 | AN2672 |
| 2309 | CONTIG47 | 18158 | 19104 | 0.65 | 5.40E-02 | transcription_start_site | - | 14958 | 14958 | -3673 | 13235 | AN2673 |
| 2309 | CONTIG47 | 18158 | 19104 | 0.65 | 5.40E-02 | transcription_start_site | - | 14401 | 14401 | -4230 | 13236 | AN2673 |
| 2309 | CONTIG47 | 18158 | 19104 | 0.65 | 5.40E-02 | transcription_start_site | - | 13684 | 13684 | -4947 | 13237 | AN2673 |
| 2309 | CONTIG47 | 18158 | 19104 | 0.65 | 5.40E-02 | transcription_start_site | - | 13580 | 13580 | -5051 | 13238 | AN2673 |
| 2309 | CONTIG47 | 18158 | 19104 | 0.65 | 5.40E-02 | transcription_start_site | - | 13348 | 13348 | -5283 | 13239 | AN2673 |
| 704  | CONTIG47 | 20570 | 20998 | 2.04 | 0.00E+00 | transcription_start_site | - | 18605 | 18605 | -2179 | 13240 | AN2674 |
| 704  | CONTIG47 | 20570 | 20998 | 2.04 | 0.00E+00 | transcription_start_site | - | 18396 | 18396 | -2388 | 13241 | AN2674 |
| 704  | CONTIG47 | 20570 | 20998 | 2.04 | 0.00E+00 | transcription_start_site | - | 18152 | 18152 | -2632 | 13242 | AN2674 |
| 704  | CONTIG47 | 20570 | 20998 | 2.04 | 0.00E+00 | transcription_start_site | - | 17620 | 17620 | -3164 | 13243 | AN2674 |
| 704  | CONTIG47 | 20570 | 20998 | 2.04 | 0.00E+00 | transcription_start_site | - | 17106 | 17106 | -3678 | 13244 | AN2674 |
| 2309 | CONTIG47 | 18158 | 19104 | 0.65 | 5.40E-02 | transcription_start_site | - | 18605 | 18605 | -26   | 13240 | AN2674 |
| 2309 | CONTIG47 | 18158 | 19104 | 0.65 | 5.40E-02 | transcription_start_site | - | 18396 | 18396 | -235  | 13241 | AN2674 |
| 2309 | CONTIG47 | 18158 | 19104 | 0.65 | 5.40E-02 | transcription_start_site | - | 18152 | 18152 | -479  | 13242 | AN2674 |
| 2309 | CONTIG47 | 18158 | 19104 | 0.65 | 5.40E-02 | transcription_start_site | - | 17620 | 17620 | -1011 | 13243 | AN2674 |
| 2309 | CONTIG47 | 18158 | 19104 | 0.65 | 5.40E-02 | transcription_start_site | - | 17106 | 17106 | -1525 | 13244 | AN2674 |
| 704  | CONTIG47 | 20570 | 20998 | 2.04 | 0.00E+00 | transcription_start_site | - | 20575 | 20575 | -209  | 13245 | AN2675 |
| 704  | CONTIG47 | 20570 | 20998 | 2.04 | 0.00E+00 | transcription_start_site | - | 20327 | 20327 | -457  | 13246 | AN2675 |
| 704  | CONTIG47 | 20570 | 20998 | 2.04 | 0.00E+00 | transcription_start_site | - | 19786 | 19786 | -998  | 13247 | AN2675 |
| 2309 | CONTIG47 | 18158 | 19104 | 0.65 | 5.40E-02 | transcription_start_site | - | 19786 | 19786 | 1155  | 13247 | AN2675 |
| 2189 | CONTIG47 | 50345 | 50829 | 0.8  | 7.66E-02 | transcription_start_site | - | 50350 | 50350 | -237  | 13279 | AN2684 |
| 2189 | CONTIG47 | 50345 | 50829 | 0.8  | 7.66E-02 | transcription_start_site | - | 50282 | 50282 | -305  | 13280 | AN2684 |
| 2189 | CONTIG47 | 50345 | 50829 | 0.8  | 7.66E-02 | transcription_start_site | - | 49393 | 49393 | -1194 | 13281 | AN2684 |

|      |          |        |        |      |          |                          |   |        |        |       |       |        |
|------|----------|--------|--------|------|----------|--------------------------|---|--------|--------|-------|-------|--------|
| 2189 | CONTIG47 | 50345  | 50829  | 0.8  | 7.66E-02 | transcription_start_site | - | 48989  | 48989  | -1598 | 13282 | AN2684 |
| 2189 | CONTIG47 | 50345  | 50829  | 0.8  | 7.66E-02 | transcription_start_site | + | 53171  | 53171  | -2584 | 13283 | AN2685 |
| 2189 | CONTIG47 | 50345  | 50829  | 0.8  | 7.66E-02 | transcription_start_site | + | 55081  | 55081  | -4494 | 13284 | AN2686 |
| 2189 | CONTIG47 | 50345  | 50829  | 0.8  | 7.66E-02 | transcription_start_site | + | 55232  | 55232  | -4645 | 13285 | AN2686 |
| 2189 | CONTIG47 | 50345  | 50829  | 0.8  | 7.66E-02 | transcription_start_site | + | 55379  | 55379  | -4792 | 13286 | AN2686 |
| 553  | CONTIG47 | 71933  | 72449  | 2.24 | 0.00E+00 | transcription_start_site | + | 72814  | 72814  | -623  | 13300 | AN2692 |
| 553  | CONTIG47 | 71933  | 72449  | 2.24 | 0.00E+00 | transcription_start_site | + | 73608  | 73608  | -1417 | 13301 | AN2692 |
| 2223 | CONTIG47 | 99014  | 99368  | 0.77 | 8.63E-02 | transcription_start_site | - | 98133  | 98133  | -1058 | 13322 | AN2701 |
| 2223 | CONTIG47 | 99014  | 99368  | 0.77 | 8.63E-02 | transcription_start_site | - | 97679  | 97679  | -1512 | 13323 | AN2701 |
| 2223 | CONTIG47 | 99014  | 99368  | 0.77 | 8.63E-02 | transcription_start_site | - | 97506  | 97506  | -1685 | 13324 | AN2701 |
| 2223 | CONTIG47 | 99014  | 99368  | 0.77 | 8.63E-02 | transcription_start_site | - | 97150  | 97150  | -2041 | 13325 | AN2701 |
| 2223 | CONTIG47 | 99014  | 99368  | 0.77 | 8.63E-02 | transcription_start_site | - | 96330  | 96330  | -2861 | 13326 | AN2701 |
| 2223 | CONTIG47 | 99014  | 99368  | 0.77 | 8.63E-02 | transcription_start_site | + | 103831 | 103831 | -4640 | 13327 | AN2702 |
| 2332 | CONTIG47 | 132693 | 133037 | 0.6  | 1.75E-02 | transcription_start_site | - | 129955 | 129955 | -2910 | 13354 | AN2710 |
| 2332 | CONTIG47 | 132693 | 133037 | 0.6  | 1.75E-02 | transcription_start_site | - | 129717 | 129717 | -3148 | 13355 | AN2710 |
| 2332 | CONTIG47 | 132693 | 133037 | 0.6  | 1.75E-02 | transcription_start_site | - | 129493 | 129493 | -3372 | 13356 | AN2710 |
| 2332 | CONTIG47 | 132693 | 133037 | 0.6  | 1.75E-02 | transcription_start_site | - | 129302 | 129302 | -3563 | 13357 | AN2710 |
| 1434 | CONTIG48 | 23793  | 24135  | 1.32 | 4.20E-02 | transcription_start_site | + | 24149  | 24149  | -185  | 13389 | AN2720 |
| 1434 | CONTIG48 | 23793  | 24135  | 1.32 | 4.20E-02 | transcription_start_site | + | 24559  | 24559  | -595  | 13390 | AN2720 |
| 1434 | CONTIG48 | 23793  | 24135  | 1.32 | 4.20E-02 | transcription_start_site | + | 24968  | 24968  | -1004 | 13391 | AN2720 |
| 1434 | CONTIG48 | 23793  | 24135  | 1.32 | 4.20E-02 | transcription_start_site | + | 28945  | 28945  | -4981 | 13396 | AN2722 |
| 59   | CONTIG48 | 65106  | 65395  | 3.21 | 0.00E+00 | transcription_start_site | - | 64232  | 64232  | -1018 | 13426 | AN2730 |
| 59   | CONTIG48 | 65106  | 65395  | 3.21 | 0.00E+00 | transcription_start_site | - | 63751  | 63751  | -1499 | 13427 | AN2730 |
| 1479 | CONTIG48 | 73654  | 74005  | 1.29 | 4.78E-02 | transcription_start_site | - | 73350  | 73350  | -479  | 13428 | AN2731 |
| 1479 | CONTIG48 | 73654  | 74005  | 1.29 | 4.78E-02 | transcription_start_site | - | 73251  | 73251  | -578  | 13429 | AN2731 |
| 1479 | CONTIG48 | 73654  | 74005  | 1.29 | 4.78E-02 | transcription_start_site | - | 73119  | 73119  | -710  | 13430 | AN2731 |
| 1479 | CONTIG48 | 73654  | 74005  | 1.29 | 4.78E-02 | transcription_start_site | - | 72232  | 72232  | -1597 | 13431 | AN2731 |
| 1907 | CONTIG48 | 88054  | 88568  | 1    | 7.38E-02 | transcription_start_site | - | 85124  | 85124  | -3187 | 13444 | AN2736 |
| 1907 | CONTIG48 | 88054  | 88568  | 1    | 7.38E-02 | transcription_start_site | - | 85010  | 85010  | -3301 | 13445 | AN2736 |
| 1907 | CONTIG48 | 88054  | 88568  | 1    | 7.38E-02 | transcription_start_site | - | 83565  | 83565  | -4746 | 13446 | AN2736 |
| 1907 | CONTIG48 | 88054  | 88568  | 1    | 7.38E-02 | transcription_start_site | - | 83140  | 83140  | -5171 | 13447 | AN2736 |
| 1907 | CONTIG48 | 88054  | 88568  | 1    | 7.38E-02 | transcription_start_site | - | 87878  | 87878  | -433  | 13448 | AN2737 |
| 1907 | CONTIG48 | 88054  | 88568  | 1    | 7.38E-02 | transcription_start_site | - | 87225  | 87225  | -1086 | 13449 | AN2737 |
| 1907 | CONTIG48 | 88054  | 88568  | 1    | 7.38E-02 | transcription_start_site | - | 85653  | 85653  | -2658 | 13450 | AN2737 |
| 1907 | CONTIG48 | 88054  | 88568  | 1    | 7.38E-02 | transcription_start_site | + | 88746  | 88746  | -435  | 13451 | AN2738 |
| 1907 | CONTIG48 | 88054  | 88568  | 1    | 7.38E-02 | transcription_start_site | + | 89179  | 89179  | -868  | 13452 | AN2738 |
| 806  | CONTIG48 | 94279  | 94783  | 1.93 | 5.08E-03 | transcription_start_site | - | 93855  | 93855  | -676  | 13453 | AN2739 |
| 806  | CONTIG48 | 94279  | 94783  | 1.93 | 5.08E-03 | transcription_start_site | - | 93028  | 93028  | -1503 | 13454 | AN2739 |
| 806  | CONTIG48 | 94279  | 94783  | 1.93 | 5.08E-03 | transcription_start_site | - | 92806  | 92806  | -1725 | 13455 | AN2739 |
| 806  | CONTIG48 | 94279  | 94783  | 1.93 | 5.08E-03 | transcription_start_site | - | 92265  | 92265  | -2266 | 13456 | AN2739 |
| 806  | CONTIG48 | 94279  | 94783  | 1.93 | 5.08E-03 | transcription_start_site | - | 92047  | 92047  | -2484 | 13457 | AN2739 |
| 806  | CONTIG48 | 94279  | 94783  | 1.93 | 5.08E-03 | transcription_start_site | - | 91839  | 91839  | -2692 | 13458 | AN2739 |
| 806  | CONTIG48 | 94279  | 94783  | 1.93 | 5.08E-03 | transcription_start_site | - | 91342  | 91342  | -3189 | 13459 | AN2739 |
| 806  | CONTIG48 | 94279  | 94783  | 1.93 | 5.08E-03 | transcription_start_site | - | 91016  | 91016  | -3515 | 13460 | AN2739 |
| 806  | CONTIG48 | 94279  | 94783  | 1.93 | 5.08E-03 | transcription_start_site | - | 90870  | 90870  | -3661 | 13461 | AN2739 |
| 806  | CONTIG48 | 94279  | 94783  | 1.93 | 5.08E-03 | transcription_start_site | - | 90694  | 90694  | -3837 | 13462 | AN2739 |
| 450  | CONTIG49 | 4512   | 5076   | 2.38 | 0.00E+00 | transcription_start_site | + | 6592   | 6592   | -1798 | 13463 | AN2740 |
| 450  | CONTIG49 | 4512   | 5076   | 2.38 | 0.00E+00 | transcription_start_site | + | 6809   | 6809   | -2015 | 13464 | AN2740 |
| 450  | CONTIG49 | 4512   | 5076   | 2.38 | 0.00E+00 | transcription_start_site | + | 7447   | 7447   | -2653 | 13465 | AN2740 |
| 450  | CONTIG49 | 4512   | 5076   | 2.38 | 0.00E+00 | transcription_start_site | + | 7563   | 7563   | -2769 | 13466 | AN2740 |
| 2173 | CONTIG49 | 1671   | 2075   | 0.82 | 1.38E-01 | transcription_start_site | + | 6592   | 6592   | -4719 | 13463 | AN2740 |
| 2173 | CONTIG49 | 1671   | 2075   | 0.82 | 1.38E-01 | transcription_start_site | + | 6809   | 6809   | -4936 | 13464 | AN2740 |
| 401  | CONTIG49 | 15312  | 15666  | 2.44 | 0.00E+00 | transcription_start_site | - | 11569  | 11569  | -3920 | 13467 | AN2741 |
| 401  | CONTIG49 | 15312  | 15666  | 2.44 | 0.00E+00 | transcription_start_site | - | 11349  | 11349  | -4140 | 13468 | AN2741 |
| 401  | CONTIG49 | 15312  | 15666  | 2.44 | 0.00E+00 | transcription_start_site | - | 11072  | 11072  | -4417 | 13469 | AN2741 |
| 1706 | CONTIG49 | 15832  | 16477  | 1.13 | 4.20E-02 | transcription_start_site | - | 11569  | 11569  | -4585 | 13467 | AN2741 |
| 1706 | CONTIG49 | 15832  | 16477  | 1.13 | 4.20E-02 | transcription_start_site | - | 11349  | 11349  | -4805 | 13468 | AN2741 |

|      |          |       |       |      |          |                          |   |       |       |       |       |        |
|------|----------|-------|-------|------|----------|--------------------------|---|-------|-------|-------|-------|--------|
| 1706 | CONTIG49 | 15832 | 16477 | 1.13 | 4.20E-02 | transcription_start_site | - | 11072 | 11072 | -5082 | 13469 | AN2741 |
| 401  | CONTIG49 | 15312 | 15666 | 2.44 | 0.00E+00 | transcription_start_site | - | 15045 | 15045 | -444  | 13470 | AN2742 |
| 401  | CONTIG49 | 15312 | 15666 | 2.44 | 0.00E+00 | transcription_start_site | - | 14824 | 14824 | -665  | 13471 | AN2742 |
| 401  | CONTIG49 | 15312 | 15666 | 2.44 | 0.00E+00 | transcription_start_site | - | 14717 | 14717 | -772  | 13472 | AN2742 |
| 401  | CONTIG49 | 15312 | 15666 | 2.44 | 0.00E+00 | transcription_start_site | - | 14632 | 14632 | -857  | 13473 | AN2742 |
| 1706 | CONTIG49 | 15832 | 16477 | 1.13 | 4.20E-02 | transcription_start_site | - | 15045 | 15045 | -1109 | 13470 | AN2742 |
| 1706 | CONTIG49 | 15832 | 16477 | 1.13 | 4.20E-02 | transcription_start_site | - | 14824 | 14824 | -1330 | 13471 | AN2742 |
| 1706 | CONTIG49 | 15832 | 16477 | 1.13 | 4.20E-02 | transcription_start_site | - | 14717 | 14717 | -1437 | 13472 | AN2742 |
| 1706 | CONTIG49 | 15832 | 16477 | 1.13 | 4.20E-02 | transcription_start_site | - | 14632 | 14632 | -1522 | 13473 | AN2742 |
| 401  | CONTIG49 | 15312 | 15666 | 2.44 | 0.00E+00 | transcription_start_site | + | 16482 | 16482 | -993  | 13474 | AN2743 |
| 401  | CONTIG49 | 15312 | 15666 | 2.44 | 0.00E+00 | transcription_start_site | + | 16607 | 16607 | -1118 | 13475 | AN2743 |
| 401  | CONTIG49 | 15312 | 15666 | 2.44 | 0.00E+00 | transcription_start_site | + | 16888 | 16888 | -1399 | 13476 | AN2743 |
| 401  | CONTIG49 | 15312 | 15666 | 2.44 | 0.00E+00 | transcription_start_site | + | 19317 | 19317 | -3828 | 13477 | AN2743 |
| 1706 | CONTIG49 | 15832 | 16477 | 1.13 | 4.20E-02 | transcription_start_site | + | 16482 | 16482 | -327  | 13474 | AN2743 |
| 1706 | CONTIG49 | 15832 | 16477 | 1.13 | 4.20E-02 | transcription_start_site | + | 16607 | 16607 | -452  | 13475 | AN2743 |
| 1706 | CONTIG49 | 15832 | 16477 | 1.13 | 4.20E-02 | transcription_start_site | + | 16888 | 16888 | -733  | 13476 | AN2743 |
| 1706 | CONTIG49 | 15832 | 16477 | 1.13 | 4.20E-02 | transcription_start_site | + | 19317 | 19317 | -3162 | 13477 | AN2743 |
| 1751 | CONTIG49 | 25515 | 25944 | 1.1  | 2.30E-02 | transcription_start_site | - | 22439 | 22439 | -3290 | 13478 | AN2744 |
| 1751 | CONTIG49 | 25515 | 25944 | 1.1  | 2.30E-02 | transcription_start_site | - | 21724 | 21724 | -4005 | 13479 | AN2744 |
| 1751 | CONTIG49 | 25515 | 25944 | 1.1  | 2.30E-02 | transcription_start_site | - | 25451 | 25451 | -278  | 13483 | AN2746 |
| 1751 | CONTIG49 | 25515 | 25944 | 1.1  | 2.30E-02 | transcription_start_site | - | 25207 | 25207 | -522  | 13484 | AN2746 |
| 1751 | CONTIG49 | 25515 | 25944 | 1.1  | 2.30E-02 | transcription_start_site | - | 26434 | 26434 | 704   | 13489 | AN2747 |
| 1751 | CONTIG49 | 25515 | 25944 | 1.1  | 2.30E-02 | transcription_start_site | - | 26652 | 26652 | 922   | 13488 | AN2747 |
| 1751 | CONTIG49 | 25515 | 25944 | 1.1  | 2.30E-02 | transcription_start_site | + | 27932 | 27932 | -2202 | 13490 | AN2748 |
| 1751 | CONTIG49 | 25515 | 25944 | 1.1  | 2.30E-02 | transcription_start_site | + | 28054 | 28054 | -2324 | 13491 | AN2748 |
| 973  | CONTIG49 | 35035 | 35536 | 1.74 | 3.37E-03 | transcription_start_site | - | 34475 | 34475 | -810  | 13492 | AN2749 |
| 973  | CONTIG49 | 35035 | 35536 | 1.74 | 3.37E-03 | transcription_start_site | - | 34376 | 34376 | -909  | 13493 | AN2749 |
| 973  | CONTIG49 | 35035 | 35536 | 1.74 | 3.37E-03 | transcription_start_site | - | 33999 | 33999 | -1286 | 13494 | AN2749 |
| 973  | CONTIG49 | 35035 | 35536 | 1.74 | 3.37E-03 | transcription_start_site | - | 33786 | 33786 | -1499 | 13495 | AN2749 |
| 973  | CONTIG49 | 35035 | 35536 | 1.74 | 3.37E-03 | transcription_start_site | + | 37461 | 37461 | -2175 | 13496 | AN2750 |
| 973  | CONTIG49 | 35035 | 35536 | 1.74 | 3.37E-03 | transcription_start_site | + | 38107 | 38107 | -2821 | 13497 | AN2750 |
| 973  | CONTIG49 | 35035 | 35536 | 1.74 | 3.37E-03 | transcription_start_site | + | 38937 | 38937 | -3651 | 13498 | AN2750 |
| 2205 | CONTIG49 | 51378 | 52117 | 0.79 | 1.54E-01 | transcription_start_site | - | 46851 | 46851 | -4896 | 13506 | AN2753 |
| 2205 | CONTIG49 | 51378 | 52117 | 0.79 | 1.54E-01 | transcription_start_site | - | 46598 | 46598 | -5149 | 13507 | AN2753 |
| 2205 | CONTIG49 | 51378 | 52117 | 0.79 | 1.54E-01 | transcription_start_site | - | 46422 | 46422 | -5325 | 13508 | AN2753 |
| 2205 | CONTIG49 | 51378 | 52117 | 0.79 | 1.54E-01 | transcription_start_site | + | 53697 | 53697 | -1949 | 13509 | AN2755 |
| 2205 | CONTIG49 | 51378 | 52117 | 0.79 | 1.54E-01 | transcription_start_site | + | 54042 | 54042 | -2294 | 13510 | AN2755 |
| 1488 | CONTIG49 | 70518 | 70927 | 1.28 | 2.29E-02 | transcription_start_site | + | 73399 | 73399 | -2676 | 13520 | AN2759 |
| 1488 | CONTIG49 | 70518 | 70927 | 1.28 | 2.29E-02 | transcription_start_site | + | 73758 | 73758 | -3035 | 13521 | AN2759 |
| 1488 | CONTIG49 | 70518 | 70927 | 1.28 | 2.29E-02 | transcription_start_site | + | 74092 | 74092 | -3369 | 13522 | AN2759 |
| 2280 | CONTIG49 | 75376 | 75955 | 0.7  | 1.57E-01 | transcription_start_site | + | 76820 | 76820 | -1154 | 13523 | AN2760 |
| 2280 | CONTIG49 | 75376 | 75955 | 0.7  | 1.57E-01 | transcription_start_site | + | 77053 | 77053 | -1387 | 13524 | AN2760 |
| 1122 | CONTIG49 | 80629 | 80981 | 1.59 | 7.08E-03 | transcription_start_site | - | 80292 | 80292 | -513  | 13525 | AN2761 |
| 1122 | CONTIG49 | 80629 | 80981 | 1.59 | 7.08E-03 | transcription_start_site | - | 80098 | 80098 | -707  | 13526 | AN2761 |
| 1122 | CONTIG49 | 80629 | 80981 | 1.59 | 7.08E-03 | transcription_start_site | - | 79953 | 79953 | -852  | 13527 | AN2761 |
| 1122 | CONTIG49 | 80629 | 80981 | 1.59 | 7.08E-03 | transcription_start_site | - | 79802 | 79802 | -1003 | 13528 | AN2761 |
| 1122 | CONTIG49 | 80629 | 80981 | 1.59 | 7.08E-03 | transcription_start_site | - | 79560 | 79560 | -1245 | 13529 | AN2761 |
| 1122 | CONTIG49 | 80629 | 80981 | 1.59 | 7.08E-03 | transcription_start_site | - | 81409 | 81409 | 604   | 13533 | AN2762 |
| 1122 | CONTIG49 | 80629 | 80981 | 1.59 | 7.08E-03 | transcription_start_site | - | 81569 | 81569 | 764   | 13532 | AN2762 |
| 1033 | CONTIG49 | 88369 | 88865 | 1.68 | 4.57E-03 | transcription_start_site | - | 85748 | 85748 | -2869 | 13534 | AN2763 |
| 1033 | CONTIG49 | 88369 | 88865 | 1.68 | 4.57E-03 | transcription_start_site | - | 84885 | 84885 | -3732 | 13535 | AN2763 |
| 1033 | CONTIG49 | 88369 | 88865 | 1.68 | 4.57E-03 | transcription_start_site | - | 84529 | 84529 | -4088 | 13536 | AN2763 |
| 1033 | CONTIG49 | 88369 | 88865 | 1.68 | 4.57E-03 | transcription_start_site | + | 87600 | 87600 | 1017  | 13541 | AN2764 |
| 1033 | CONTIG49 | 88369 | 88865 | 1.68 | 4.57E-03 | transcription_start_site | + | 90263 | 90263 | -1646 | 13542 | AN2765 |
| 1033 | CONTIG49 | 88369 | 88865 | 1.68 | 4.57E-03 | transcription_start_site | + | 90428 | 90428 | -1811 | 13543 | AN2765 |
| 1033 | CONTIG49 | 88369 | 88865 | 1.68 | 4.57E-03 | transcription_start_site | + | 90613 | 90613 | -1996 | 13544 | AN2765 |
| 1033 | CONTIG49 | 88369 | 88865 | 1.68 | 4.57E-03 | transcription_start_site | + | 90760 | 90760 | -2143 | 13545 | AN2765 |



|      |          |        |        |      |          |                          |   |        |        |       |       |        |
|------|----------|--------|--------|------|----------|--------------------------|---|--------|--------|-------|-------|--------|
| 1033 | CONTIG49 | 88369  | 88865  | 1.68 | 4.57E-03 | transcription_start_site | + | 91030  | 91030  | -2413 | 13546 | AN2765 |
| 1033 | CONTIG49 | 88369  | 88865  | 1.68 | 4.57E-03 | transcription_start_site | + | 91141  | 91141  | -2524 | 13547 | AN2765 |
| 1033 | CONTIG49 | 88369  | 88865  | 1.68 | 4.57E-03 | transcription_start_site | + | 91366  | 91366  | -2749 | 13548 | AN2765 |
| 1033 | CONTIG49 | 88369  | 88865  | 1.68 | 4.57E-03 | transcription_start_site | + | 93342  | 93342  | -4725 | 13549 | AN2766 |
| 1033 | CONTIG49 | 88369  | 88865  | 1.68 | 4.57E-03 | transcription_start_site | + | 93780  | 93780  | -5163 | 13550 | AN2766 |
| 1262 | CONTIG49 | 92404  | 92775  | 1.47 | 1.06E-02 | transcription_start_site | + | 93342  | 93342  | -752  | 13549 | AN2766 |
| 1262 | CONTIG49 | 92404  | 92775  | 1.47 | 1.06E-02 | transcription_start_site | + | 93780  | 93780  | -1190 | 13550 | AN2766 |
| 1262 | CONTIG49 | 92404  | 92775  | 1.47 | 1.06E-02 | transcription_start_site | + | 94533  | 94533  | -1943 | 13551 | AN2766 |
| 1262 | CONTIG49 | 92404  | 92775  | 1.47 | 1.06E-02 | transcription_start_site | + | 95545  | 95545  | -2955 | 13552 | AN2766 |
| 2255 | CONTIG49 | 110336 | 110996 | 0.73 | 1.34E-01 | transcription_start_site | - | 110186 | 110186 | -480  | 13558 | AN2770 |
| 2255 | CONTIG49 | 110336 | 110996 | 0.73 | 1.34E-01 | transcription_start_site | - | 109685 | 109685 | -981  | 13559 | AN2770 |
| 2255 | CONTIG49 | 110336 | 110996 | 0.73 | 1.34E-01 | transcription_start_site | - | 108310 | 108310 | -2356 | 13560 | AN2770 |
| 2255 | CONTIG49 | 110336 | 110996 | 0.73 | 1.34E-01 | transcription_start_site | + | 111156 | 111156 | -490  | 13561 | AN2771 |
| 2303 | CONTIG49 | 120311 | 120875 | 0.67 | 1.81E-01 | transcription_start_site | - | 118997 | 118997 | -1596 | 13562 | AN2772 |
| 2303 | CONTIG49 | 120311 | 120875 | 0.67 | 1.81E-01 | transcription_start_site | + | 119576 | 119576 | 1017  | 13565 | AN2773 |
| 2303 | CONTIG49 | 120311 | 120875 | 0.67 | 1.81E-01 | transcription_start_site | + | 119458 | 119458 | 1135  | 13564 | AN2773 |
| 2303 | CONTIG49 | 120311 | 120875 | 0.67 | 1.81E-01 | transcription_start_site | + | 121976 | 121976 | -1383 | 13566 | AN2774 |
| 2303 | CONTIG49 | 120311 | 120875 | 0.67 | 1.81E-01 | transcription_start_site | + | 122096 | 122096 | -1503 | 13567 | AN2774 |
| 2303 | CONTIG49 | 120311 | 120875 | 0.67 | 1.81E-01 | transcription_start_site | + | 122495 | 122495 | -1902 | 13568 | AN2774 |
| 2303 | CONTIG49 | 120311 | 120875 | 0.67 | 1.81E-01 | transcription_start_site | + | 122626 | 122626 | -2033 | 13569 | AN2774 |
| 1941 | CONTIG49 | 164859 | 165368 | 0.98 | 7.66E-02 | transcription_start_site | - | 159976 | 159976 | -5137 | 13622 | AN2790 |
| 1263 | CONTIG49 | 169059 | 169333 | 1.47 | 1.06E-02 | transcription_start_site | - | 164758 | 164758 | -4438 | 13626 | AN2792 |
| 1263 | CONTIG49 | 169059 | 169333 | 1.47 | 1.06E-02 | transcription_start_site | - | 164504 | 164504 | -4692 | 13627 | AN2792 |
| 1263 | CONTIG49 | 169059 | 169333 | 1.47 | 1.06E-02 | transcription_start_site | - | 164191 | 164191 | -5005 | 13628 | AN2792 |
| 1941 | CONTIG49 | 164859 | 165368 | 0.98 | 7.66E-02 | transcription_start_site | - | 164758 | 164758 | -355  | 13626 | AN2792 |
| 1941 | CONTIG49 | 164859 | 165368 | 0.98 | 7.66E-02 | transcription_start_site | - | 164504 | 164504 | -609  | 13627 | AN2792 |
| 1941 | CONTIG49 | 164859 | 165368 | 0.98 | 7.66E-02 | transcription_start_site | - | 164191 | 164191 | -922  | 13628 | AN2792 |
| 1941 | CONTIG49 | 164859 | 165368 | 0.98 | 7.66E-02 | transcription_start_site | - | 164048 | 164048 | -1065 | 13629 | AN2792 |
| 1941 | CONTIG49 | 164859 | 165368 | 0.98 | 7.66E-02 | transcription_start_site | - | 163914 | 163914 | -1199 | 13630 | AN2792 |
| 1263 | CONTIG49 | 169059 | 169333 | 1.47 | 1.06E-02 | transcription_start_site | - | 166681 | 166681 | -2515 | 13631 | AN2793 |
| 1263 | CONTIG49 | 169059 | 169333 | 1.47 | 1.06E-02 | transcription_start_site | - | 166149 | 166149 | -3047 | 13632 | AN2793 |
| 1263 | CONTIG49 | 169059 | 169333 | 1.47 | 1.06E-02 | transcription_start_site | - | 165668 | 165668 | -3528 | 13633 | AN2793 |
| 1941 | CONTIG49 | 164859 | 165368 | 0.98 | 7.66E-02 | transcription_start_site | - | 165668 | 165668 | 554   | 13633 | AN2793 |
| 1941 | CONTIG49 | 164859 | 165368 | 0.98 | 7.66E-02 | transcription_start_site | - | 166149 | 166149 | 1035  | 13632 | AN2793 |
| 1263 | CONTIG49 | 169059 | 169333 | 1.47 | 1.06E-02 | transcription_start_site | + | 170235 | 170235 | -1039 | 13634 | AN2794 |
| 1263 | CONTIG49 | 169059 | 169333 | 1.47 | 1.06E-02 | transcription_start_site | + | 170538 | 170538 | -1342 | 13635 | AN2794 |
| 1263 | CONTIG49 | 169059 | 169333 | 1.47 | 1.06E-02 | transcription_start_site | + | 170825 | 170825 | -1629 | 13636 | AN2794 |
| 1941 | CONTIG49 | 164859 | 165368 | 0.98 | 7.66E-02 | transcription_start_site | + | 170235 | 170235 | -5121 | 13634 | AN2794 |
| 1263 | CONTIG49 | 169059 | 169333 | 1.47 | 1.06E-02 | transcription_start_site | + | 172625 | 172625 | -3429 | 13637 | AN2795 |
| 1263 | CONTIG49 | 169059 | 169333 | 1.47 | 1.06E-02 | transcription_start_site | + | 174312 | 174312 | -5116 | 13638 | AN2795 |
| 1154 | CONTIG50 | 6606   | 6895   | 1.57 | 2.63E-02 | transcription_start_site | + | 6935   | 6935   | -184  | 13692 | AN2809 |
| 1154 | CONTIG50 | 6606   | 6895   | 1.57 | 2.63E-02 | transcription_start_site | + | 7173   | 7173   | -422  | 13693 | AN2809 |
| 1930 | CONTIG50 | 10816  | 11391  | 0.99 | 1.54E-01 | transcription_start_site | - | 10337  | 10337  | -766  | 13694 | AN2810 |
| 1930 | CONTIG50 | 10816  | 11391  | 0.99 | 1.54E-01 | transcription_start_site | - | 10169  | 10169  | -934  | 13695 | AN2810 |
| 1930 | CONTIG50 | 10816  | 11391  | 0.99 | 1.54E-01 | transcription_start_site | - | 9062   | 9062   | -2041 | 13696 | AN2810 |
| 1930 | CONTIG50 | 10816  | 11391  | 0.99 | 1.54E-01 | transcription_start_site | + | 15709  | 15709  | -4605 | 13697 | AN2811 |
| 1930 | CONTIG50 | 10816  | 11391  | 0.99 | 1.54E-01 | transcription_start_site | + | 15910  | 15910  | -4806 | 13698 | AN2811 |
| 1930 | CONTIG50 | 10816  | 11391  | 0.99 | 1.54E-01 | transcription_start_site | + | 16124  | 16124  | -5020 | 13699 | AN2811 |
| 1194 | CONTIG50 | 30753  | 31197  | 1.53 | 3.01E-02 | transcription_start_site | - | 27697  | 27697  | -3278 | 13706 | AN2814 |
| 1194 | CONTIG50 | 30753  | 31197  | 1.53 | 3.01E-02 | transcription_start_site | - | 27532  | 27532  | -3443 | 13707 | AN2814 |
| 1194 | CONTIG50 | 30753  | 31197  | 1.53 | 3.01E-02 | transcription_start_site | - | 27419  | 27419  | -3556 | 13708 | AN2814 |
| 1194 | CONTIG50 | 30753  | 31197  | 1.53 | 3.01E-02 | transcription_start_site | - | 27318  | 27318  | -3657 | 13709 | AN2814 |
| 1194 | CONTIG50 | 30753  | 31197  | 1.53 | 3.01E-02 | transcription_start_site | - | 27159  | 27159  | -3816 | 13710 | AN2814 |
| 1194 | CONTIG50 | 30753  | 31197  | 1.53 | 3.01E-02 | transcription_start_site | - | 26864  | 26864  | -4111 | 13711 | AN2814 |
| 1194 | CONTIG50 | 30753  | 31197  | 1.53 | 3.01E-02 | transcription_start_site | - | 26496  | 26496  | -4479 | 13712 | AN2814 |
| 1194 | CONTIG50 | 30753  | 31197  | 1.53 | 3.01E-02 | transcription_start_site | - | 26176  | 26176  | -4799 | 13713 | AN2814 |
| 1194 | CONTIG50 | 30753  | 31197  | 1.53 | 3.01E-02 | transcription_start_site | - | 25755  | 25755  | -5220 | 13714 | AN2814 |

|      |          |        |        |      |          |                          |   |        |        |       |       |        |
|------|----------|--------|--------|------|----------|--------------------------|---|--------|--------|-------|-------|--------|
| 547  | CONTIG50 | 33768  | 34487  | 2.25 | 1.20E-03 | transcription_start_site | + | 34837  | 34837  | -709  | 13715 | AN2815 |
| 1194 | CONTIG50 | 30753  | 31197  | 1.53 | 3.01E-02 | transcription_start_site | + | 34837  | 34837  | -3862 | 13715 | AN2815 |
| 1460 | CONTIG50 | 40051  | 40575  | 1.3  | 6.04E-02 | transcription_start_site | - | 39425  | 39425  | -888  | 13716 | AN2817 |
| 1460 | CONTIG50 | 40051  | 40575  | 1.3  | 6.04E-02 | transcription_start_site | + | 44437  | 44437  | -4124 | 13717 | AN2818 |
| 426  | CONTIG51 | 12829  | 13103  | 2.42 | 2.32E-03 | transcription_start_site | + | 13540  | 13540  | -574  | 13730 | AN2822 |
| 1078 | CONTIG51 | 40505  | 40859  | 1.64 | 3.01E-02 | transcription_start_site | - | 37684  | 37684  | -2998 | 13741 | AN2828 |
| 1078 | CONTIG51 | 40505  | 40859  | 1.64 | 3.01E-02 | transcription_start_site | - | 37093  | 37093  | -3589 | 13742 | AN2828 |
| 1078 | CONTIG51 | 40505  | 40859  | 1.64 | 3.01E-02 | transcription_start_site | - | 36325  | 36325  | -4357 | 13743 | AN2828 |
| 1078 | CONTIG51 | 40505  | 40859  | 1.64 | 3.01E-02 | transcription_start_site | - | 36112  | 36112  | -4570 | 13744 | AN2828 |
| 1078 | CONTIG51 | 40505  | 40859  | 1.64 | 3.01E-02 | transcription_start_site | - | 35621  | 35621  | -5061 | 13745 | AN2828 |
| 1078 | CONTIG51 | 40505  | 40859  | 1.64 | 3.01E-02 | transcription_start_site | - | 40113  | 40113  | -569  | 13746 | AN2829 |
| 1078 | CONTIG51 | 40505  | 40859  | 1.64 | 3.01E-02 | transcription_start_site | - | 38656  | 38656  | -2026 | 13747 | AN2829 |
| 1078 | CONTIG51 | 40505  | 40859  | 1.64 | 3.01E-02 | transcription_start_site | - | 38523  | 38523  | -2159 | 13748 | AN2829 |
| 1078 | CONTIG51 | 40505  | 40859  | 1.64 | 3.01E-02 | transcription_start_site | - | 41841  | 41841  | 1159  | 13749 | AN2830 |
| 1350 | CONTIG51 | 78467  | 78881  | 1.4  | 6.04E-02 | transcription_start_site | - | 73921  | 73921  | -4753 | 13780 | AN2841 |
| 1350 | CONTIG51 | 78467  | 78881  | 1.4  | 6.04E-02 | transcription_start_site | - | 76227  | 76227  | -2447 | 13782 | AN2842 |
| 1350 | CONTIG51 | 78467  | 78881  | 1.4  | 6.04E-02 | transcription_start_site | - | 75523  | 75523  | -3151 | 13783 | AN2842 |
| 1350 | CONTIG51 | 78467  | 78881  | 1.4  | 6.04E-02 | transcription_start_site | + | 78140  | 78140  | 534   | 13784 | AN2843 |
| 1350 | CONTIG51 | 78467  | 78881  | 1.4  | 6.04E-02 | transcription_start_site | + | 79854  | 79854  | -1180 | 13785 | AN2844 |
| 1350 | CONTIG51 | 78467  | 78881  | 1.4  | 6.04E-02 | transcription_start_site | + | 80267  | 80267  | -1593 | 13786 | AN2844 |
| 1350 | CONTIG51 | 78467  | 78881  | 1.4  | 6.04E-02 | transcription_start_site | + | 80459  | 80459  | -1785 | 13787 | AN2844 |
| 1350 | CONTIG51 | 78467  | 78881  | 1.4  | 6.04E-02 | transcription_start_site | + | 83811  | 83811  | -5137 | 13788 | AN2845 |
| 480  | CONTIG51 | 101336 | 101832 | 2.34 | 3.37E-03 | transcription_start_site | - | 100678 | 100678 | -906  | 13809 | AN2852 |
| 480  | CONTIG51 | 101336 | 101832 | 2.34 | 3.37E-03 | transcription_start_site | - | 100338 | 100338 | -1246 | 13810 | AN2852 |
| 480  | CONTIG51 | 101336 | 101832 | 2.34 | 3.37E-03 | transcription_start_site | - | 99482  | 99482  | -2102 | 13811 | AN2852 |
| 480  | CONTIG51 | 101336 | 101832 | 2.34 | 3.37E-03 | transcription_start_site | - | 98823  | 98823  | -2761 | 13812 | AN2852 |
| 542  | CONTIG51 | 107252 | 107909 | 2.26 | 4.57E-03 | transcription_start_site | - | 104014 | 104014 | -3566 | 13813 | AN2853 |
| 1300 | CONTIG51 | 107937 | 108576 | 1.44 | 5.36E-02 | transcription_start_site | - | 104014 | 104014 | -4242 | 13813 | AN2853 |
| 319  | CONTIG51 | 110862 | 112036 | 2.59 | 0.00E+00 | transcription_start_site | - | 106882 | 106882 | -4567 | 13814 | AN2854 |
| 319  | CONTIG51 | 110862 | 112036 | 2.59 | 0.00E+00 | transcription_start_site | - | 106630 | 106630 | -4819 | 13815 | AN2854 |
| 542  | CONTIG51 | 107252 | 107909 | 2.26 | 4.57E-03 | transcription_start_site | - | 106882 | 106882 | -698  | 13814 | AN2854 |
| 542  | CONTIG51 | 107252 | 107909 | 2.26 | 4.57E-03 | transcription_start_site | - | 106630 | 106630 | -950  | 13815 | AN2854 |
| 542  | CONTIG51 | 107252 | 107909 | 2.26 | 4.57E-03 | transcription_start_site | - | 104629 | 104629 | -2951 | 13816 | AN2854 |
| 1300 | CONTIG51 | 107937 | 108576 | 1.44 | 5.36E-02 | transcription_start_site | - | 106882 | 106882 | -1374 | 13814 | AN2854 |
| 1300 | CONTIG51 | 107937 | 108576 | 1.44 | 5.36E-02 | transcription_start_site | - | 106630 | 106630 | -1626 | 13815 | AN2854 |
| 1300 | CONTIG51 | 107937 | 108576 | 1.44 | 5.36E-02 | transcription_start_site | - | 104629 | 104629 | -3627 | 13816 | AN2854 |
| 319  | CONTIG51 | 110862 | 112036 | 2.59 | 0.00E+00 | transcription_start_site | - | 110402 | 110402 | -1047 | 13817 | AN2855 |
| 319  | CONTIG51 | 110862 | 112036 | 2.59 | 0.00E+00 | transcription_start_site | - | 110035 | 110035 | -1414 | 13818 | AN2855 |
| 319  | CONTIG51 | 110862 | 112036 | 2.59 | 0.00E+00 | transcription_start_site | - | 109693 | 109693 | -1756 | 13819 | AN2855 |
| 319  | CONTIG51 | 110862 | 112036 | 2.59 | 0.00E+00 | transcription_start_site | - | 112993 | 112993 | 1544  | 13823 | AN2856 |
| 319  | CONTIG51 | 110862 | 112036 | 2.59 | 0.00E+00 | transcription_start_site | + | 115254 | 115254 | -3805 | 13824 | AN2857 |
| 1508 | CONTIG51 | 122780 | 123129 | 1.27 | 8.63E-02 | transcription_start_site | - | 119201 | 119201 | -3753 | 13826 | AN2858 |
| 1508 | CONTIG51 | 122780 | 123129 | 1.27 | 8.63E-02 | transcription_start_site | - | 118951 | 118951 | -4003 | 13827 | AN2858 |
| 1508 | CONTIG51 | 122780 | 123129 | 1.27 | 8.63E-02 | transcription_start_site | - | 118190 | 118190 | -4764 | 13828 | AN2858 |
| 1508 | CONTIG51 | 122780 | 123129 | 1.27 | 8.63E-02 | transcription_start_site | - | 118046 | 118046 | -4908 | 13829 | AN2858 |
| 1982 | CONTIG51 | 119270 | 120054 | 0.95 | 8.32E-02 | transcription_start_site | - | 119201 | 119201 | -461  | 13826 | AN2858 |
| 1982 | CONTIG51 | 119270 | 120054 | 0.95 | 8.32E-02 | transcription_start_site | - | 118951 | 118951 | -711  | 13827 | AN2858 |
| 1982 | CONTIG51 | 119270 | 120054 | 0.95 | 8.32E-02 | transcription_start_site | - | 118190 | 118190 | -1472 | 13828 | AN2858 |
| 1982 | CONTIG51 | 119270 | 120054 | 0.95 | 8.32E-02 | transcription_start_site | - | 118046 | 118046 | -1616 | 13829 | AN2858 |
| 1982 | CONTIG51 | 119270 | 120054 | 0.95 | 8.32E-02 | transcription_start_site | + | 119746 | 119746 | -84   | 13830 | AN2859 |
| 1508 | CONTIG51 | 122780 | 123129 | 1.27 | 8.63E-02 | transcription_start_site | + | 121858 | 121858 | 1096  | 13835 | AN2860 |
| 1982 | CONTIG51 | 119270 | 120054 | 0.95 | 8.32E-02 | transcription_start_site | + | 121446 | 121446 | -1784 | 13831 | AN2860 |
| 1982 | CONTIG51 | 119270 | 120054 | 0.95 | 8.32E-02 | transcription_start_site | + | 121576 | 121576 | -1914 | 13832 | AN2860 |
| 1982 | CONTIG51 | 119270 | 120054 | 0.95 | 8.32E-02 | transcription_start_site | + | 121656 | 121656 | -1994 | 13833 | AN2860 |
| 1982 | CONTIG51 | 119270 | 120054 | 0.95 | 8.32E-02 | transcription_start_site | + | 121769 | 121769 | -2107 | 13834 | AN2860 |
| 1982 | CONTIG51 | 119270 | 120054 | 0.95 | 8.32E-02 | transcription_start_site | + | 121858 | 121858 | -2196 | 13835 | AN2860 |
| 1508 | CONTIG51 | 122780 | 123129 | 1.27 | 8.63E-02 | transcription_start_site | + | 123619 | 123619 | -664  | 13836 | AN2861 |

|      |          |        |        |      |          |                          |   |        |        |       |       |        |
|------|----------|--------|--------|------|----------|--------------------------|---|--------|--------|-------|-------|--------|
| 1508 | CONTIG51 | 122780 | 123129 | 1.27 | 8.63E-02 | transcription_start_site | + | 124667 | 124667 | -1712 | 13837 | AN2861 |
| 1982 | CONTIG51 | 119270 | 120054 | 0.95 | 8.32E-02 | transcription_start_site | + | 123619 | 123619 | -3957 | 13836 | AN2861 |
| 1982 | CONTIG51 | 119270 | 120054 | 0.95 | 8.32E-02 | transcription_start_site | + | 124667 | 124667 | -5005 | 13837 | AN2861 |
| 87   | CONTIG51 | 127970 | 128229 | 3.12 | 0.00E+00 | transcription_start_site | + | 127237 | 127237 | 862   | 13843 | AN2862 |
| 1508 | CONTIG51 | 122780 | 123129 | 1.27 | 8.63E-02 | transcription_start_site | + | 126199 | 126199 | -3244 | 13838 | AN2862 |
| 1508 | CONTIG51 | 122780 | 123129 | 1.27 | 8.63E-02 | transcription_start_site | + | 126292 | 126292 | -3337 | 13839 | AN2862 |
| 1508 | CONTIG51 | 122780 | 123129 | 1.27 | 8.63E-02 | transcription_start_site | + | 126473 | 126473 | -3518 | 13840 | AN2862 |
| 1508 | CONTIG51 | 122780 | 123129 | 1.27 | 8.63E-02 | transcription_start_site | + | 126570 | 126570 | -3615 | 13841 | AN2862 |
| 1508 | CONTIG51 | 122780 | 123129 | 1.27 | 8.63E-02 | transcription_start_site | + | 126706 | 126706 | -3751 | 13842 | AN2862 |
| 1508 | CONTIG51 | 122780 | 123129 | 1.27 | 8.63E-02 | transcription_start_site | + | 127237 | 127237 | -4282 | 13843 | AN2862 |
| 1873 | CONTIG51 | 125869 | 126665 | 1.03 | 1.76E-01 | transcription_start_site | + | 126292 | 126292 | -25   | 13839 | AN2862 |
| 1873 | CONTIG51 | 125869 | 126665 | 1.03 | 1.76E-01 | transcription_start_site | + | 126199 | 126199 | 68    | 13838 | AN2862 |
| 1873 | CONTIG51 | 125869 | 126665 | 1.03 | 1.76E-01 | transcription_start_site | + | 126473 | 126473 | -206  | 13840 | AN2862 |
| 1873 | CONTIG51 | 125869 | 126665 | 1.03 | 1.76E-01 | transcription_start_site | + | 126570 | 126570 | -303  | 13841 | AN2862 |
| 1873 | CONTIG51 | 125869 | 126665 | 1.03 | 1.76E-01 | transcription_start_site | + | 126706 | 126706 | -439  | 13842 | AN2862 |
| 1873 | CONTIG51 | 125869 | 126665 | 1.03 | 1.76E-01 | transcription_start_site | + | 127237 | 127237 | -970  | 13843 | AN2862 |
| 87   | CONTIG51 | 127970 | 128229 | 3.12 | 0.00E+00 | transcription_start_site | + | 128876 | 128876 | -776  | 13844 | AN2863 |
| 1873 | CONTIG51 | 125869 | 126665 | 1.03 | 1.76E-01 | transcription_start_site | + | 128876 | 128876 | -2609 | 13844 | AN2863 |
| 87   | CONTIG51 | 127970 | 128229 | 3.12 | 0.00E+00 | transcription_start_site | + | 131400 | 131400 | -3300 | 13845 | AN2864 |
| 87   | CONTIG51 | 127970 | 128229 | 3.12 | 0.00E+00 | transcription_start_site | + | 131597 | 131597 | -3497 | 13846 | AN2864 |
| 87   | CONTIG51 | 127970 | 128229 | 3.12 | 0.00E+00 | transcription_start_site | + | 132016 | 132016 | -3916 | 13847 | AN2864 |
| 1873 | CONTIG51 | 125869 | 126665 | 1.03 | 1.76E-01 | transcription_start_site | + | 131400 | 131400 | -5133 | 13845 | AN2864 |
| 1873 | CONTIG51 | 125869 | 126665 | 1.03 | 1.76E-01 | transcription_start_site | + | 131597 | 131597 | -5330 | 13846 | AN2864 |
| 1209 | CONTIG51 | 159094 | 159433 | 1.52 | 4.20E-02 | transcription_start_site | - | 155006 | 155006 | -4257 | 13861 | AN2870 |
| 1209 | CONTIG51 | 159094 | 159433 | 1.52 | 4.20E-02 | transcription_start_site | - | 154217 | 154217 | -5046 | 13862 | AN2870 |
| 1209 | CONTIG51 | 159094 | 159433 | 1.52 | 4.20E-02 | transcription_start_site | - | 158651 | 158651 | -612  | 13863 | AN2871 |
| 1209 | CONTIG51 | 159094 | 159433 | 1.52 | 4.20E-02 | transcription_start_site | - | 158287 | 158287 | -976  | 13864 | AN2871 |
| 1209 | CONTIG51 | 159094 | 159433 | 1.52 | 4.20E-02 | transcription_start_site | + | 159635 | 159635 | -371  | 13865 | AN2872 |
| 1209 | CONTIG51 | 159094 | 159433 | 1.52 | 4.20E-02 | transcription_start_site | + | 161089 | 161089 | -1825 | 13866 | AN2872 |
| 1209 | CONTIG51 | 159094 | 159433 | 1.52 | 4.20E-02 | transcription_start_site | + | 161636 | 161636 | -2372 | 13867 | AN2872 |
| 1209 | CONTIG51 | 159094 | 159433 | 1.52 | 4.20E-02 | transcription_start_site | + | 162550 | 162550 | -3286 | 13868 | AN2873 |
| 1209 | CONTIG51 | 159094 | 159433 | 1.52 | 4.20E-02 | transcription_start_site | + | 162662 | 162662 | -3398 | 13869 | AN2873 |
| 1209 | CONTIG51 | 159094 | 159433 | 1.52 | 4.20E-02 | transcription_start_site | + | 162857 | 162857 | -3593 | 13870 | AN2873 |
| 1209 | CONTIG51 | 159094 | 159433 | 1.52 | 4.20E-02 | transcription_start_site | + | 162932 | 162932 | -3668 | 13871 | AN2873 |
| 1209 | CONTIG51 | 159094 | 159433 | 1.52 | 4.20E-02 | transcription_start_site | + | 163228 | 163228 | -3964 | 13872 | AN2873 |
| 1209 | CONTIG51 | 159094 | 159433 | 1.52 | 4.20E-02 | transcription_start_site | + | 163306 | 163306 | -4042 | 13873 | AN2873 |
| 1209 | CONTIG51 | 159094 | 159433 | 1.52 | 4.20E-02 | transcription_start_site | + | 163531 | 163531 | -4267 | 13874 | AN2873 |
| 1209 | CONTIG51 | 159094 | 159433 | 1.52 | 4.20E-02 | transcription_start_site | + | 163675 | 163675 | -4411 | 13875 | AN2873 |
| 1209 | CONTIG51 | 159094 | 159433 | 1.52 | 4.20E-02 | transcription_start_site | + | 163824 | 163824 | -4560 | 13876 | AN2873 |
| 1209 | CONTIG51 | 159094 | 159433 | 1.52 | 4.20E-02 | transcription_start_site | + | 163946 | 163946 | -4682 | 13877 | AN2873 |
| 837  | CONTIG51 | 175442 | 175784 | 1.89 | 1.37E-02 | transcription_start_site | + | 176018 | 176018 | -405  | 13885 | AN2875 |
| 837  | CONTIG51 | 175442 | 175784 | 1.89 | 1.37E-02 | transcription_start_site | + | 176182 | 176182 | -569  | 13886 | AN2875 |
| 837  | CONTIG51 | 175442 | 175784 | 1.89 | 1.37E-02 | transcription_start_site | + | 176341 | 176341 | -728  | 13887 | AN2875 |
| 837  | CONTIG51 | 175442 | 175784 | 1.89 | 1.37E-02 | transcription_start_site | + | 176696 | 176696 | -1083 | 13888 | AN2875 |
| 837  | CONTIG51 | 175442 | 175784 | 1.89 | 1.37E-02 | transcription_start_site | + | 177923 | 177923 | -2310 | 13889 | AN2876 |
| 837  | CONTIG51 | 175442 | 175784 | 1.89 | 1.37E-02 | transcription_start_site | + | 178139 | 178139 | -2526 | 13890 | AN2876 |
| 837  | CONTIG51 | 175442 | 175784 | 1.89 | 1.37E-02 | transcription_start_site | + | 178224 | 178224 | -2611 | 13891 | AN2876 |
| 837  | CONTIG51 | 175442 | 175784 | 1.89 | 1.37E-02 | transcription_start_site | + | 178758 | 178758 | -3145 | 13892 | AN2876 |
| 837  | CONTIG51 | 175442 | 175784 | 1.89 | 1.37E-02 | transcription_start_site | + | 178928 | 178928 | -3315 | 13893 | AN2876 |
| 837  | CONTIG51 | 175442 | 175784 | 1.89 | 1.37E-02 | transcription_start_site | + | 179187 | 179187 | -3574 | 13894 | AN2876 |
| 837  | CONTIG51 | 175442 | 175784 | 1.89 | 1.37E-02 | transcription_start_site | + | 179473 | 179473 | -3860 | 13895 | AN2876 |
| 837  | CONTIG51 | 175442 | 175784 | 1.89 | 1.37E-02 | transcription_start_site | + | 179590 | 179590 | -3977 | 13896 | AN2876 |
| 837  | CONTIG51 | 175442 | 175784 | 1.89 | 1.37E-02 | transcription_start_site | + | 179748 | 179748 | -4135 | 13897 | AN2876 |
| 419  | CONTIG51 | 187361 | 187714 | 2.42 | 1.20E-03 | transcription_start_site | + | 186641 | 186641 | 896   | 13908 | AN2879 |
| 419  | CONTIG51 | 187361 | 187714 | 2.42 | 1.20E-03 | transcription_start_site | + | 186501 | 186501 | 1036  | 13907 | AN2879 |
| 419  | CONTIG51 | 187361 | 187714 | 2.42 | 1.20E-03 | transcription_start_site | + | 188166 | 188166 | -628  | 13909 | AN2880 |
| 419  | CONTIG51 | 187361 | 187714 | 2.42 | 1.20E-03 | transcription_start_site | + | 188301 | 188301 | -763  | 13910 | AN2880 |

|      |          |        |        |      |          |                          |   |        |        |       |       |        |
|------|----------|--------|--------|------|----------|--------------------------|---|--------|--------|-------|-------|--------|
| 419  | CONTIG51 | 187361 | 187714 | 2.42 | 1.20E-03 | transcription_start_site | + | 188890 | 188890 | -1352 | 13911 | AN2880 |
| 419  | CONTIG51 | 187361 | 187714 | 2.42 | 1.20E-03 | transcription_start_site | + | 191260 | 191260 | -3722 | 13912 | AN2880 |
| 419  | CONTIG51 | 187361 | 187714 | 2.42 | 1.20E-03 | transcription_start_site | + | 192528 | 192528 | -4990 | 13913 | AN2881 |
| 419  | CONTIG51 | 187361 | 187714 | 2.42 | 1.20E-03 | transcription_start_site | + | 192664 | 192664 | -5126 | 13914 | AN2881 |
| 1435 | CONTIG51 | 203117 | 203914 | 1.32 | 4.21E-02 | transcription_start_site | - | 198959 | 198959 | -4556 | 13919 | AN2884 |
| 1435 | CONTIG51 | 203117 | 203914 | 1.32 | 4.21E-02 | transcription_start_site | - | 198487 | 198487 | -5028 | 13920 | AN2884 |
| 1435 | CONTIG51 | 203117 | 203914 | 1.32 | 4.21E-02 | transcription_start_site | - | 201379 | 201379 | -2136 | 13926 | AN2885 |
| 1435 | CONTIG51 | 203117 | 203914 | 1.32 | 4.21E-02 | transcription_start_site | - | 201260 | 201260 | -2255 | 13927 | AN2885 |
| 1435 | CONTIG51 | 203117 | 203914 | 1.32 | 4.21E-02 | transcription_start_site | - | 201111 | 201111 | -2404 | 13928 | AN2885 |
| 1435 | CONTIG51 | 203117 | 203914 | 1.32 | 4.21E-02 | transcription_start_site | - | 200926 | 200926 | -2589 | 13929 | AN2885 |
| 1435 | CONTIG51 | 203117 | 203914 | 1.32 | 4.21E-02 | transcription_start_site | - | 204319 | 204319 | 803   | 13932 | AN2886 |
| 1435 | CONTIG51 | 203117 | 203914 | 1.32 | 4.21E-02 | transcription_start_site | - | 204557 | 204557 | 1041  | 13931 | AN2886 |
| 1435 | CONTIG51 | 203117 | 203914 | 1.32 | 4.21E-02 | transcription_start_site | - | 204780 | 204780 | 1264  | 13930 | AN2886 |
| 1435 | CONTIG51 | 203117 | 203914 | 1.32 | 4.21E-02 | transcription_start_site | + | 205287 | 205287 | -1771 | 13933 | AN2887 |
| 1435 | CONTIG51 | 203117 | 203914 | 1.32 | 4.21E-02 | transcription_start_site | + | 205374 | 205374 | -1858 | 13934 | AN2887 |
| 2128 | CONTIG51 | 224041 | 224995 | 0.86 | 1.64E-01 | transcription_start_site | - | 220755 | 220755 | -3763 | 13943 | AN2892 |
| 2128 | CONTIG51 | 224041 | 224995 | 0.86 | 1.64E-01 | transcription_start_site | - | 220550 | 220550 | -3968 | 13944 | AN2892 |
| 2128 | CONTIG51 | 224041 | 224995 | 0.86 | 1.64E-01 | transcription_start_site | - | 220122 | 220122 | -4396 | 13945 | AN2892 |
| 2128 | CONTIG51 | 224041 | 224995 | 0.86 | 1.64E-01 | transcription_start_site | - | 219885 | 219885 | -4633 | 13946 | AN2892 |
| 2128 | CONTIG51 | 224041 | 224995 | 0.86 | 1.64E-01 | transcription_start_site | - | 219342 | 219342 | -5176 | 13947 | AN2892 |
| 2128 | CONTIG51 | 224041 | 224995 | 0.86 | 1.64E-01 | transcription_start_site | - | 224331 | 224331 | -187  | 13949 | AN2894 |
| 2128 | CONTIG51 | 224041 | 224995 | 0.86 | 1.64E-01 | transcription_start_site | - | 224049 | 224049 | -469  | 13950 | AN2894 |
| 658  | CONTIG51 | 230778 | 231067 | 2.1  | 7.70E-03 | transcription_start_site | - | 229970 | 229970 | -952  | 13951 | AN2895 |
| 658  | CONTIG51 | 230778 | 231067 | 2.1  | 7.70E-03 | transcription_start_site | - | 229508 | 229508 | -1414 | 13952 | AN2895 |
| 658  | CONTIG51 | 230778 | 231067 | 2.1  | 7.70E-03 | transcription_start_site | - | 228491 | 228491 | -2431 | 13953 | AN2895 |
| 1682 | CONTIG51 | 256214 | 256561 | 1.15 | 1.22E-01 | transcription_start_site | - | 253838 | 253838 | -2549 | 13971 | AN2902 |
| 1682 | CONTIG51 | 256214 | 256561 | 1.15 | 1.22E-01 | transcription_start_site | - | 253539 | 253539 | -2848 | 13972 | AN2902 |
| 1682 | CONTIG51 | 256214 | 256561 | 1.15 | 1.22E-01 | transcription_start_site | - | 253403 | 253403 | -2984 | 13973 | AN2902 |
| 1556 | CONTIG51 | 260104 | 260853 | 1.23 | 5.49E-02 | transcription_start_site | - | 256203 | 256203 | -4275 | 13974 | AN2903 |
| 1556 | CONTIG51 | 260104 | 260853 | 1.23 | 5.49E-02 | transcription_start_site | - | 256038 | 256038 | -4440 | 13975 | AN2903 |
| 1556 | CONTIG51 | 260104 | 260853 | 1.23 | 5.49E-02 | transcription_start_site | - | 255848 | 255848 | -4630 | 13976 | AN2903 |
| 1556 | CONTIG51 | 260104 | 260853 | 1.23 | 5.49E-02 | transcription_start_site | - | 255134 | 255134 | -5344 | 13977 | AN2903 |
| 1682 | CONTIG51 | 256214 | 256561 | 1.15 | 1.22E-01 | transcription_start_site | - | 256203 | 256203 | -184  | 13974 | AN2903 |
| 1682 | CONTIG51 | 256214 | 256561 | 1.15 | 1.22E-01 | transcription_start_site | - | 256038 | 256038 | -349  | 13975 | AN2903 |
| 1682 | CONTIG51 | 256214 | 256561 | 1.15 | 1.22E-01 | transcription_start_site | - | 255848 | 255848 | -539  | 13976 | AN2903 |
| 1682 | CONTIG51 | 256214 | 256561 | 1.15 | 1.22E-01 | transcription_start_site | - | 255134 | 255134 | -1253 | 13977 | AN2903 |
| 1556 | CONTIG51 | 260104 | 260853 | 1.23 | 5.49E-02 | transcription_start_site | - | 258691 | 258691 | -1787 | 13978 | AN2904 |
| 1556 | CONTIG51 | 260104 | 260853 | 1.23 | 5.49E-02 | transcription_start_site | - | 258478 | 258478 | -2000 | 13979 | AN2904 |
| 1556 | CONTIG51 | 260104 | 260853 | 1.23 | 5.49E-02 | transcription_start_site | - | 258384 | 258384 | -2094 | 13980 | AN2904 |
| 1556 | CONTIG51 | 260104 | 260853 | 1.23 | 5.49E-02 | transcription_start_site | - | 258236 | 258236 | -2242 | 13981 | AN2904 |
| 1556 | CONTIG51 | 260104 | 260853 | 1.23 | 5.49E-02 | transcription_start_site | - | 257887 | 257887 | -2591 | 13982 | AN2904 |
| 1556 | CONTIG51 | 260104 | 260853 | 1.23 | 5.49E-02 | transcription_start_site | - | 257163 | 257163 | -3315 | 13983 | AN2904 |
| 1682 | CONTIG51 | 256214 | 256561 | 1.15 | 1.22E-01 | transcription_start_site | - | 257163 | 257163 | 775   | 13983 | AN2904 |
| 1556 | CONTIG51 | 260104 | 260853 | 1.23 | 5.49E-02 | transcription_start_site | + | 261418 | 261418 | -939  | 13984 | AN2905 |
| 1682 | CONTIG51 | 256214 | 256561 | 1.15 | 1.22E-01 | transcription_start_site | + | 261418 | 261418 | -5030 | 13984 | AN2905 |
| 40   | CONTIG51 | 275411 | 275843 | 3.29 | 0.00E+00 | transcription_start_site | - | 273162 | 273162 | -2465 | 13995 | AN2909 |
| 40   | CONTIG51 | 275411 | 275843 | 3.29 | 0.00E+00 | transcription_start_site | - | 272727 | 272727 | -2900 | 13996 | AN2909 |
| 40   | CONTIG51 | 275411 | 275843 | 3.29 | 0.00E+00 | transcription_start_site | - | 272083 | 272083 | -3544 | 13997 | AN2909 |
| 322  | CONTIG51 | 275946 | 277105 | 2.59 | 7.63E-04 | transcription_start_site | - | 273162 | 273162 | -3363 | 13995 | AN2909 |
| 322  | CONTIG51 | 275946 | 277105 | 2.59 | 7.63E-04 | transcription_start_site | - | 272727 | 272727 | -3798 | 13996 | AN2909 |
| 322  | CONTIG51 | 275946 | 277105 | 2.59 | 7.63E-04 | transcription_start_site | - | 272083 | 272083 | -4442 | 13997 | AN2909 |
| 40   | CONTIG51 | 275411 | 275843 | 3.29 | 0.00E+00 | transcription_start_site | + | 274832 | 274832 | 795   | 13999 | AN2910 |
| 40   | CONTIG51 | 275411 | 275843 | 3.29 | 0.00E+00 | transcription_start_site | + | 276855 | 276855 | -1228 | 14000 | AN2911 |
| 40   | CONTIG51 | 275411 | 275843 | 3.29 | 0.00E+00 | transcription_start_site | + | 277205 | 277205 | -1578 | 14001 | AN2911 |
| 40   | CONTIG51 | 275411 | 275843 | 3.29 | 0.00E+00 | transcription_start_site | + | 278390 | 278390 | -2763 | 14002 | AN2911 |
| 322  | CONTIG51 | 275946 | 277105 | 2.59 | 7.63E-04 | transcription_start_site | + | 276855 | 276855 | -329  | 14000 | AN2911 |
| 322  | CONTIG51 | 275946 | 277105 | 2.59 | 7.63E-04 | transcription_start_site | + | 277205 | 277205 | -679  | 14001 | AN2911 |

|      |          |        |        |      |          |                          |   |        |        |       |       |        |
|------|----------|--------|--------|------|----------|--------------------------|---|--------|--------|-------|-------|--------|
| 322  | CONTIG51 | 275946 | 277105 | 2.59 | 7.63E-04 | transcription_start_site | + | 278390 | 278390 | -1864 | 14002 | AN2911 |
| 881  | CONTIG51 | 286201 | 287095 | 1.85 | 0.00E+00 | transcription_start_site | - | 285575 | 285575 | -1073 | 14003 | AN2912 |
| 881  | CONTIG51 | 286201 | 287095 | 1.85 | 0.00E+00 | transcription_start_site | - | 285425 | 285425 | -1223 | 14004 | AN2912 |
| 881  | CONTIG51 | 286201 | 287095 | 1.85 | 0.00E+00 | transcription_start_site | - | 285063 | 285063 | -1585 | 14005 | AN2912 |
| 881  | CONTIG51 | 286201 | 287095 | 1.85 | 0.00E+00 | transcription_start_site | + | 287650 | 287650 | -1002 | 14006 | AN2913 |
| 881  | CONTIG51 | 286201 | 287095 | 1.85 | 0.00E+00 | transcription_start_site | + | 287797 | 287797 | -1149 | 14007 | AN2913 |
| 881  | CONTIG51 | 286201 | 287095 | 1.85 | 0.00E+00 | transcription_start_site | + | 291013 | 291013 | -4365 | 14008 | AN2914 |
| 881  | CONTIG51 | 286201 | 287095 | 1.85 | 0.00E+00 | transcription_start_site | + | 291130 | 291130 | -4482 | 14009 | AN2914 |
| 881  | CONTIG51 | 286201 | 287095 | 1.85 | 0.00E+00 | transcription_start_site | + | 292009 | 292009 | -5361 | 14010 | AN2914 |
| 1683 | CONTIG51 | 297831 | 298264 | 1.15 | 1.22E-01 | transcription_start_site | - | 294344 | 294344 | -3703 | 14011 | AN2915 |
| 1683 | CONTIG51 | 297831 | 298264 | 1.15 | 1.22E-01 | transcription_start_site | - | 293252 | 293252 | -4795 | 14012 | AN2915 |
| 1683 | CONTIG51 | 297831 | 298264 | 1.15 | 1.22E-01 | transcription_start_site | - | 297808 | 297808 | -239  | 14013 | AN2916 |
| 1683 | CONTIG51 | 297831 | 298264 | 1.15 | 1.22E-01 | transcription_start_site | - | 297690 | 297690 | -357  | 14014 | AN2916 |
| 1683 | CONTIG51 | 297831 | 298264 | 1.15 | 1.22E-01 | transcription_start_site | - | 297571 | 297571 | -476  | 14015 | AN2916 |
| 1683 | CONTIG51 | 297831 | 298264 | 1.15 | 1.22E-01 | transcription_start_site | - | 297442 | 297442 | -605  | 14016 | AN2916 |
| 1683 | CONTIG51 | 297831 | 298264 | 1.15 | 1.22E-01 | transcription_start_site | - | 297228 | 297228 | -819  | 14017 | AN2916 |
| 1683 | CONTIG51 | 297831 | 298264 | 1.15 | 1.22E-01 | transcription_start_site | - | 295788 | 295788 | -2259 | 14018 | AN2916 |
| 1683 | CONTIG51 | 297831 | 298264 | 1.15 | 1.22E-01 | transcription_start_site | + | 300362 | 300362 | -2314 | 14023 | AN2918 |
| 1683 | CONTIG51 | 297831 | 298264 | 1.15 | 1.22E-01 | transcription_start_site | + | 300462 | 300462 | -2414 | 14024 | AN2918 |
| 1683 | CONTIG51 | 297831 | 298264 | 1.15 | 1.22E-01 | transcription_start_site | + | 300563 | 300563 | -2515 | 14025 | AN2918 |
| 1683 | CONTIG51 | 297831 | 298264 | 1.15 | 1.22E-01 | transcription_start_site | + | 300635 | 300635 | -2587 | 14026 | AN2918 |
| 1683 | CONTIG51 | 297831 | 298264 | 1.15 | 1.22E-01 | transcription_start_site | + | 300713 | 300713 | -2665 | 14027 | AN2918 |
| 1683 | CONTIG51 | 297831 | 298264 | 1.15 | 1.22E-01 | transcription_start_site | + | 300797 | 300797 | -2749 | 14028 | AN2918 |
| 1683 | CONTIG51 | 297831 | 298264 | 1.15 | 1.22E-01 | transcription_start_site | + | 301418 | 301418 | -3370 | 14029 | AN2918 |
| 481  | CONTIG51 | 306321 | 306652 | 2.34 | 3.37E-03 | transcription_start_site | - | 305813 | 305813 | -673  | 14030 | AN2919 |
| 481  | CONTIG51 | 306321 | 306652 | 2.34 | 3.37E-03 | transcription_start_site | - | 305242 | 305242 | -1244 | 14031 | AN2919 |
| 481  | CONTIG51 | 306321 | 306652 | 2.34 | 3.37E-03 | transcription_start_site | - | 304692 | 304692 | -1794 | 14032 | AN2919 |
| 481  | CONTIG51 | 306321 | 306652 | 2.34 | 3.37E-03 | transcription_start_site | + | 306674 | 306674 | -187  | 14033 | AN2920 |
| 458  | CONTIG51 | 311035 | 311546 | 2.38 | 2.61E-03 | transcription_start_site | - | 311858 | 311858 | 567   | 14037 | AN2921 |
| 458  | CONTIG51 | 311035 | 311546 | 2.38 | 2.61E-03 | transcription_start_site | - | 312538 | 312538 | 1247  | 14036 | AN2921 |
| 458  | CONTIG51 | 311035 | 311546 | 2.38 | 2.61E-03 | transcription_start_site | + | 316393 | 316393 | -5102 | 14042 | AN2923 |
| 1874 | CONTIG51 | 342759 | 343043 | 1.03 | 1.76E-01 | transcription_start_site | + | 346523 | 346523 | -3622 | 14062 | AN2930 |
| 1874 | CONTIG51 | 342759 | 343043 | 1.03 | 1.76E-01 | transcription_start_site | + | 346618 | 346618 | -3717 | 14063 | AN2930 |
| 1874 | CONTIG51 | 342759 | 343043 | 1.03 | 1.76E-01 | transcription_start_site | + | 346905 | 346905 | -4004 | 14064 | AN2930 |
| 1509 | CONTIG51 | 362270 | 362609 | 1.27 | 8.63E-02 | transcription_start_site | - | 359656 | 359656 | -2783 | 14082 | AN2936 |
| 1509 | CONTIG51 | 362270 | 362609 | 1.27 | 8.63E-02 | transcription_start_site | - | 359407 | 359407 | -3032 | 14083 | AN2936 |
| 1509 | CONTIG51 | 362270 | 362609 | 1.27 | 8.63E-02 | transcription_start_site | - | 358846 | 358846 | -3593 | 14084 | AN2936 |
| 1509 | CONTIG51 | 362270 | 362609 | 1.27 | 8.63E-02 | transcription_start_site | + | 363508 | 363508 | -1068 | 14086 | AN2937 |
| 1254 | CONTIG51 | 370592 | 371001 | 1.48 | 4.78E-02 | transcription_start_site | - | 368212 | 368212 | -2584 | 14087 | AN2938 |
| 1254 | CONTIG51 | 370592 | 371001 | 1.48 | 4.78E-02 | transcription_start_site | - | 368106 | 368106 | -2690 | 14088 | AN2938 |
| 1254 | CONTIG51 | 370592 | 371001 | 1.48 | 4.78E-02 | transcription_start_site | - | 367810 | 367810 | -2986 | 14089 | AN2938 |
| 1254 | CONTIG51 | 370592 | 371001 | 1.48 | 4.78E-02 | transcription_start_site | - | 367700 | 367700 | -3096 | 14090 | AN2938 |
| 1254 | CONTIG51 | 370592 | 371001 | 1.48 | 4.78E-02 | transcription_start_site | - | 367264 | 367264 | -3532 | 14091 | AN2938 |
| 1254 | CONTIG51 | 370592 | 371001 | 1.48 | 4.78E-02 | transcription_start_site | - | 366756 | 366756 | -4040 | 14092 | AN2938 |
| 1254 | CONTIG51 | 370592 | 371001 | 1.48 | 4.78E-02 | transcription_start_site | - | 366451 | 366451 | -4345 | 14093 | AN2938 |
| 1504 | CONTIG51 | 371402 | 371976 | 1.27 | 4.73E-02 | transcription_start_site | - | 368212 | 368212 | -3477 | 14087 | AN2938 |
| 1504 | CONTIG51 | 371402 | 371976 | 1.27 | 4.73E-02 | transcription_start_site | - | 368106 | 368106 | -3583 | 14088 | AN2938 |
| 1504 | CONTIG51 | 371402 | 371976 | 1.27 | 4.73E-02 | transcription_start_site | - | 367810 | 367810 | -3879 | 14089 | AN2938 |
| 1504 | CONTIG51 | 371402 | 371976 | 1.27 | 4.73E-02 | transcription_start_site | - | 367700 | 367700 | -3989 | 14090 | AN2938 |
| 1504 | CONTIG51 | 371402 | 371976 | 1.27 | 4.73E-02 | transcription_start_site | - | 367264 | 367264 | -4425 | 14091 | AN2938 |
| 1504 | CONTIG51 | 371402 | 371976 | 1.27 | 4.73E-02 | transcription_start_site | - | 366756 | 366756 | -4933 | 14092 | AN2938 |
| 1504 | CONTIG51 | 371402 | 371976 | 1.27 | 4.73E-02 | transcription_start_site | - | 366451 | 366451 | -5238 | 14093 | AN2938 |
| 1113 | CONTIG51 | 374492 | 374916 | 1.6  | 3.34E-02 | transcription_start_site | - | 370571 | 370571 | -4133 | 14094 | AN2939 |
| 1113 | CONTIG51 | 374492 | 374916 | 1.6  | 3.34E-02 | transcription_start_site | - | 370426 | 370426 | -4278 | 14095 | AN2939 |
| 1113 | CONTIG51 | 374492 | 374916 | 1.6  | 3.34E-02 | transcription_start_site | - | 369853 | 369853 | -4851 | 14096 | AN2939 |
| 1254 | CONTIG51 | 370592 | 371001 | 1.48 | 4.78E-02 | transcription_start_site | - | 370571 | 370571 | -225  | 14094 | AN2939 |
| 1254 | CONTIG51 | 370592 | 371001 | 1.48 | 4.78E-02 | transcription_start_site | - | 370426 | 370426 | -370  | 14095 | AN2939 |

|      |          |        |        |      |          |                          |   |        |        |       |       |        |
|------|----------|--------|--------|------|----------|--------------------------|---|--------|--------|-------|-------|--------|
| 1254 | CONTIG51 | 370592 | 371001 | 1.48 | 4.78E-02 | transcription_start_site | - | 369853 | 369853 | -943  | 14096 | AN2939 |
| 1504 | CONTIG51 | 371402 | 371976 | 1.27 | 4.73E-02 | transcription_start_site | - | 370571 | 370571 | -1118 | 14094 | AN2939 |
| 1504 | CONTIG51 | 371402 | 371976 | 1.27 | 4.73E-02 | transcription_start_site | - | 370426 | 370426 | -1263 | 14095 | AN2939 |
| 1504 | CONTIG51 | 371402 | 371976 | 1.27 | 4.73E-02 | transcription_start_site | - | 369853 | 369853 | -1836 | 14096 | AN2939 |
| 1113 | CONTIG51 | 374492 | 374916 | 1.6  | 3.34E-02 | transcription_start_site | - | 374318 | 374318 | -386  | 14097 | AN2940 |
| 1113 | CONTIG51 | 374492 | 374916 | 1.6  | 3.34E-02 | transcription_start_site | - | 373456 | 373456 | -1248 | 14098 | AN2940 |
| 420  | CONTIG51 | 384167 | 384591 | 2.42 | 1.20E-03 | transcription_start_site | - | 383275 | 383275 | -1104 | 14105 | AN2942 |
| 420  | CONTIG51 | 384167 | 384591 | 2.42 | 1.20E-03 | transcription_start_site | - | 382789 | 382789 | -1590 | 14106 | AN2942 |
| 420  | CONTIG51 | 384167 | 384591 | 2.42 | 1.20E-03 | transcription_start_site | + | 384661 | 384661 | -282  | 14107 | AN2943 |
| 420  | CONTIG51 | 384167 | 384591 | 2.42 | 1.20E-03 | transcription_start_site | + | 385918 | 385918 | -1539 | 14108 | AN2943 |
| 62   | CONTIG51 | 390002 | 390288 | 3.21 | 0.00E+00 | transcription_start_site | - | 388927 | 388927 | -1218 | 14109 | AN2944 |
| 62   | CONTIG51 | 390002 | 390288 | 3.21 | 0.00E+00 | transcription_start_site | - | 388346 | 388346 | -1799 | 14110 | AN2944 |
| 1748 | CONTIG51 | 392337 | 392623 | 1.11 | 1.38E-01 | transcription_start_site | - | 388927 | 388927 | -3553 | 14109 | AN2944 |
| 1748 | CONTIG51 | 392337 | 392623 | 1.11 | 1.38E-01 | transcription_start_site | - | 388346 | 388346 | -4134 | 14110 | AN2944 |
| 1167 | CONTIG51 | 399757 | 400181 | 1.56 | 1.83E-02 | transcription_start_site | + | 401192 | 401192 | -1223 | 14111 | AN2946 |
| 1167 | CONTIG51 | 399757 | 400181 | 1.56 | 1.83E-02 | transcription_start_site | + | 403589 | 403589 | -3620 | 14112 | AN2946 |
| 1167 | CONTIG51 | 399757 | 400181 | 1.56 | 1.83E-02 | transcription_start_site | + | 403940 | 403940 | -3971 | 14113 | AN2946 |
| 133  | CONTIG51 | 421671 | 422022 | 3    | 0.00E+00 | transcription_start_site | - | 416996 | 416996 | -4850 | 14126 | AN2951 |
| 228  | CONTIG51 | 421063 | 421625 | 2.75 | 2.06E-04 | transcription_start_site | - | 416996 | 416996 | -4348 | 14126 | AN2951 |
| 1114 | CONTIG51 | 424671 | 424925 | 1.6  | 3.34E-02 | transcription_start_site | - | 423790 | 423790 | -1008 | 14131 | AN2953 |
| 1031 | CONTIG51 | 430431 | 430724 | 1.69 | 2.63E-02 | transcription_start_site | - | 429607 | 429607 | -970  | 14132 | AN2954 |
| 1031 | CONTIG51 | 430431 | 430724 | 1.69 | 2.63E-02 | transcription_start_site | - | 427032 | 427032 | -3545 | 14133 | AN2954 |
| 1031 | CONTIG51 | 430431 | 430724 | 1.69 | 2.63E-02 | transcription_start_site | + | 431649 | 431649 | -1071 | 14134 | AN2955 |
| 1031 | CONTIG51 | 430431 | 430724 | 1.69 | 2.63E-02 | transcription_start_site | + | 431919 | 431919 | -1341 | 14135 | AN2955 |
| 882  | CONTIG51 | 445730 | 446004 | 1.85 | 1.54E-02 | transcription_start_site | - | 445561 | 445561 | -306  | 14143 | AN2957 |
| 882  | CONTIG51 | 445730 | 446004 | 1.85 | 1.54E-02 | transcription_start_site | - | 444998 | 444998 | -869  | 14144 | AN2957 |
| 882  | CONTIG51 | 445730 | 446004 | 1.85 | 1.54E-02 | transcription_start_site | - | 444556 | 444556 | -1311 | 14145 | AN2957 |
| 882  | CONTIG51 | 445730 | 446004 | 1.85 | 1.54E-02 | transcription_start_site | + | 446410 | 446410 | -543  | 14146 | AN2958 |
| 882  | CONTIG51 | 445730 | 446004 | 1.85 | 1.54E-02 | transcription_start_site | + | 446535 | 446535 | -668  | 14147 | AN2958 |
| 882  | CONTIG51 | 445730 | 446004 | 1.85 | 1.54E-02 | transcription_start_site | + | 446788 | 446788 | -921  | 14148 | AN2958 |
| 882  | CONTIG51 | 445730 | 446004 | 1.85 | 1.54E-02 | transcription_start_site | + | 447040 | 447040 | -1173 | 14149 | AN2958 |
| 882  | CONTIG51 | 445730 | 446004 | 1.85 | 1.54E-02 | transcription_start_site | + | 447221 | 447221 | -1354 | 14150 | AN2958 |
| 882  | CONTIG51 | 445730 | 446004 | 1.85 | 1.54E-02 | transcription_start_site | + | 447511 | 447511 | -1644 | 14151 | AN2958 |
| 882  | CONTIG51 | 445730 | 446004 | 1.85 | 1.54E-02 | transcription_start_site | + | 447634 | 447634 | -1767 | 14152 | AN2958 |
| 882  | CONTIG51 | 445730 | 446004 | 1.85 | 1.54E-02 | transcription_start_site | + | 448069 | 448069 | -2202 | 14153 | AN2958 |
| 1737 | CONTIG51 | 466353 | 466853 | 1.11 | 8.54E-02 | transcription_start_site | - | 461513 | 461513 | -5090 | 14164 | AN2961 |
| 1737 | CONTIG51 | 466353 | 466853 | 1.11 | 8.54E-02 | transcription_start_site | - | 466143 | 466143 | -460  | 14167 | AN2962 |
| 1737 | CONTIG51 | 466353 | 466853 | 1.11 | 8.54E-02 | transcription_start_site | - | 465987 | 465987 | -616  | 14168 | AN2962 |
| 1737 | CONTIG51 | 466353 | 466853 | 1.11 | 8.54E-02 | transcription_start_site | - | 465884 | 465884 | -719  | 14169 | AN2962 |
| 1737 | CONTIG51 | 466353 | 466853 | 1.11 | 8.54E-02 | transcription_start_site | - | 465760 | 465760 | -843  | 14170 | AN2962 |
| 1737 | CONTIG51 | 466353 | 466853 | 1.11 | 8.54E-02 | transcription_start_site | - | 465636 | 465636 | -967  | 14171 | AN2962 |
| 1737 | CONTIG51 | 466353 | 466853 | 1.11 | 8.54E-02 | transcription_start_site | - | 465492 | 465492 | -1111 | 14172 | AN2962 |
| 1737 | CONTIG51 | 466353 | 466853 | 1.11 | 8.54E-02 | transcription_start_site | - | 465357 | 465357 | -1246 | 14173 | AN2962 |
| 1737 | CONTIG51 | 466353 | 466853 | 1.11 | 8.54E-02 | transcription_start_site | - | 465232 | 465232 | -1371 | 14174 | AN2962 |
| 1737 | CONTIG51 | 466353 | 466853 | 1.11 | 8.54E-02 | transcription_start_site | - | 465056 | 465056 | -1547 | 14175 | AN2962 |
| 1737 | CONTIG51 | 466353 | 466853 | 1.11 | 8.54E-02 | transcription_start_site | - | 464929 | 464929 | -1674 | 14176 | AN2962 |
| 1737 | CONTIG51 | 466353 | 466853 | 1.11 | 8.54E-02 | transcription_start_site | - | 464844 | 464844 | -1759 | 14177 | AN2962 |
| 1737 | CONTIG51 | 466353 | 466853 | 1.11 | 8.54E-02 | transcription_start_site | - | 464762 | 464762 | -1841 | 14178 | AN2962 |
| 1737 | CONTIG51 | 466353 | 466853 | 1.11 | 8.54E-02 | transcription_start_site | - | 464680 | 464680 | -1923 | 14179 | AN2962 |
| 1737 | CONTIG51 | 466353 | 466853 | 1.11 | 8.54E-02 | transcription_start_site | - | 464600 | 464600 | -2003 | 14180 | AN2962 |
| 1737 | CONTIG51 | 466353 | 466853 | 1.11 | 8.54E-02 | transcription_start_site | - | 464340 | 464340 | -2263 | 14181 | AN2962 |
| 1737 | CONTIG51 | 466353 | 466853 | 1.11 | 8.54E-02 | transcription_start_site | - | 464207 | 464207 | -2396 | 14182 | AN2962 |
| 1737 | CONTIG51 | 466353 | 466853 | 1.11 | 8.54E-02 | transcription_start_site | - | 464032 | 464032 | -2571 | 14183 | AN2962 |
| 1737 | CONTIG51 | 466353 | 466853 | 1.11 | 8.54E-02 | transcription_start_site | - | 463808 | 463808 | -2795 | 14184 | AN2962 |
| 1737 | CONTIG51 | 466353 | 466853 | 1.11 | 8.54E-02 | transcription_start_site | - | 463681 | 463681 | -2922 | 14185 | AN2962 |
| 1737 | CONTIG51 | 466353 | 466853 | 1.11 | 8.54E-02 | transcription_start_site | - | 466812 | 466812 | 209   | 14191 | AN2963 |
| 1737 | CONTIG51 | 466353 | 466853 | 1.11 | 8.54E-02 | transcription_start_site | - | 467229 | 467229 | 626   | 14190 | AN2963 |



|      |          |        |        |      |          |                          |   |        |        |       |       |        |
|------|----------|--------|--------|------|----------|--------------------------|---|--------|--------|-------|-------|--------|
| 1737 | CONTIG51 | 466353 | 466853 | 1.11 | 8.54E-02 | transcription_start_site | - | 467585 | 467585 | 982   | 14189 | AN2963 |
| 1505 | CONTIG51 | 483603 | 483955 | 1.27 | 4.73E-02 | transcription_start_site | - | 483101 | 483101 | -678  | 14198 | AN2967 |
| 1505 | CONTIG51 | 483603 | 483955 | 1.27 | 4.73E-02 | transcription_start_site | + | 484222 | 484222 | -443  | 14199 | AN2968 |
| 1505 | CONTIG51 | 483603 | 483955 | 1.27 | 4.73E-02 | transcription_start_site | + | 484476 | 484476 | -697  | 14200 | AN2968 |
| 1505 | CONTIG51 | 483603 | 483955 | 1.27 | 4.73E-02 | transcription_start_site | + | 484658 | 484658 | -879  | 14201 | AN2968 |
| 1505 | CONTIG51 | 483603 | 483955 | 1.27 | 4.73E-02 | transcription_start_site | + | 485052 | 485052 | -1273 | 14202 | AN2968 |
| 1505 | CONTIG51 | 483603 | 483955 | 1.27 | 4.73E-02 | transcription_start_site | + | 485184 | 485184 | -1405 | 14203 | AN2968 |
| 1505 | CONTIG51 | 483603 | 483955 | 1.27 | 4.73E-02 | transcription_start_site | + | 488168 | 488168 | -4389 | 14204 | AN2969 |
| 1505 | CONTIG51 | 483603 | 483955 | 1.27 | 4.73E-02 | transcription_start_site | + | 488343 | 488343 | -4564 | 14205 | AN2969 |
| 1505 | CONTIG51 | 483603 | 483955 | 1.27 | 4.73E-02 | transcription_start_site | + | 488474 | 488474 | -4695 | 14206 | AN2969 |
| 950  | CONTIG51 | 511145 | 511629 | 1.77 | 2.05E-02 | transcription_start_site | - | 510340 | 510340 | -1047 | 14239 | AN2979 |
| 950  | CONTIG51 | 511145 | 511629 | 1.77 | 2.05E-02 | transcription_start_site | - | 510080 | 510080 | -1307 | 14240 | AN2979 |
| 950  | CONTIG51 | 511145 | 511629 | 1.77 | 2.05E-02 | transcription_start_site | - | 509953 | 509953 | -1434 | 14241 | AN2979 |
| 950  | CONTIG51 | 511145 | 511629 | 1.77 | 2.05E-02 | transcription_start_site | - | 509785 | 509785 | -1602 | 14242 | AN2979 |
| 1436 | CONTIG51 | 515195 | 516144 | 1.32 | 4.21E-02 | transcription_start_site | - | 510340 | 510340 | -5329 | 14239 | AN2979 |
| 1510 | CONTIG51 | 514660 | 515019 | 1.27 | 8.63E-02 | transcription_start_site | - | 510340 | 510340 | -4499 | 14239 | AN2979 |
| 1510 | CONTIG51 | 514660 | 515019 | 1.27 | 8.63E-02 | transcription_start_site | - | 510080 | 510080 | -4759 | 14240 | AN2979 |
| 1510 | CONTIG51 | 514660 | 515019 | 1.27 | 8.63E-02 | transcription_start_site | - | 509953 | 509953 | -4886 | 14241 | AN2979 |
| 1510 | CONTIG51 | 514660 | 515019 | 1.27 | 8.63E-02 | transcription_start_site | - | 509785 | 509785 | -5054 | 14242 | AN2979 |
| 1436 | CONTIG51 | 515195 | 516144 | 1.32 | 4.21E-02 | transcription_start_site | - | 514568 | 514568 | -1101 | 14243 | AN2980 |
| 1436 | CONTIG51 | 515195 | 516144 | 1.32 | 4.21E-02 | transcription_start_site | - | 514419 | 514419 | -1250 | 14244 | AN2980 |
| 1436 | CONTIG51 | 515195 | 516144 | 1.32 | 4.21E-02 | transcription_start_site | - | 514274 | 514274 | -1395 | 14245 | AN2980 |
| 1436 | CONTIG51 | 515195 | 516144 | 1.32 | 4.21E-02 | transcription_start_site | - | 514161 | 514161 | -1508 | 14246 | AN2980 |
| 1436 | CONTIG51 | 515195 | 516144 | 1.32 | 4.21E-02 | transcription_start_site | - | 514062 | 514062 | -1607 | 14247 | AN2980 |
| 1436 | CONTIG51 | 515195 | 516144 | 1.32 | 4.21E-02 | transcription_start_site | - | 513884 | 513884 | -1785 | 14248 | AN2980 |
| 1510 | CONTIG51 | 514660 | 515019 | 1.27 | 8.63E-02 | transcription_start_site | - | 514568 | 514568 | -271  | 14243 | AN2980 |
| 1510 | CONTIG51 | 514660 | 515019 | 1.27 | 8.63E-02 | transcription_start_site | - | 514419 | 514419 | -420  | 14244 | AN2980 |
| 1510 | CONTIG51 | 514660 | 515019 | 1.27 | 8.63E-02 | transcription_start_site | - | 514274 | 514274 | -565  | 14245 | AN2980 |
| 1510 | CONTIG51 | 514660 | 515019 | 1.27 | 8.63E-02 | transcription_start_site | - | 514161 | 514161 | -678  | 14246 | AN2980 |
| 1510 | CONTIG51 | 514660 | 515019 | 1.27 | 8.63E-02 | transcription_start_site | - | 514062 | 514062 | -777  | 14247 | AN2980 |
| 1510 | CONTIG51 | 514660 | 515019 | 1.27 | 8.63E-02 | transcription_start_site | - | 513884 | 513884 | -955  | 14248 | AN2980 |
| 1436 | CONTIG51 | 515195 | 516144 | 1.32 | 4.21E-02 | transcription_start_site | + | 516991 | 516991 | -1321 | 14249 | AN2981 |
| 1436 | CONTIG51 | 515195 | 516144 | 1.32 | 4.21E-02 | transcription_start_site | + | 517305 | 517305 | -1635 | 14250 | AN2981 |
| 1436 | CONTIG51 | 515195 | 516144 | 1.32 | 4.21E-02 | transcription_start_site | + | 517440 | 517440 | -1770 | 14251 | AN2981 |
| 1436 | CONTIG51 | 515195 | 516144 | 1.32 | 4.21E-02 | transcription_start_site | + | 517522 | 517522 | -1852 | 14252 | AN2981 |
| 1436 | CONTIG51 | 515195 | 516144 | 1.32 | 4.21E-02 | transcription_start_site | + | 517936 | 517936 | -2266 | 14253 | AN2981 |
| 1436 | CONTIG51 | 515195 | 516144 | 1.32 | 4.21E-02 | transcription_start_site | + | 518195 | 518195 | -2525 | 14254 | AN2981 |
| 1436 | CONTIG51 | 515195 | 516144 | 1.32 | 4.21E-02 | transcription_start_site | + | 518332 | 518332 | -2662 | 14255 | AN2981 |
| 1436 | CONTIG51 | 515195 | 516144 | 1.32 | 4.21E-02 | transcription_start_site | + | 518459 | 518459 | -2789 | 14256 | AN2981 |
| 1436 | CONTIG51 | 515195 | 516144 | 1.32 | 4.21E-02 | transcription_start_site | + | 518719 | 518719 | -3049 | 14257 | AN2981 |
| 1436 | CONTIG51 | 515195 | 516144 | 1.32 | 4.21E-02 | transcription_start_site | + | 519148 | 519148 | -3478 | 14258 | AN2981 |
| 1510 | CONTIG51 | 514660 | 515019 | 1.27 | 8.63E-02 | transcription_start_site | + | 516991 | 516991 | -2151 | 14249 | AN2981 |
| 1510 | CONTIG51 | 514660 | 515019 | 1.27 | 8.63E-02 | transcription_start_site | + | 517305 | 517305 | -2465 | 14250 | AN2981 |
| 1510 | CONTIG51 | 514660 | 515019 | 1.27 | 8.63E-02 | transcription_start_site | + | 517440 | 517440 | -2600 | 14251 | AN2981 |
| 1510 | CONTIG51 | 514660 | 515019 | 1.27 | 8.63E-02 | transcription_start_site | + | 517522 | 517522 | -2682 | 14252 | AN2981 |
| 1510 | CONTIG51 | 514660 | 515019 | 1.27 | 8.63E-02 | transcription_start_site | + | 517936 | 517936 | -3096 | 14253 | AN2981 |
| 1510 | CONTIG51 | 514660 | 515019 | 1.27 | 8.63E-02 | transcription_start_site | + | 518195 | 518195 | -3355 | 14254 | AN2981 |
| 1510 | CONTIG51 | 514660 | 515019 | 1.27 | 8.63E-02 | transcription_start_site | + | 518332 | 518332 | -3492 | 14255 | AN2981 |
| 1510 | CONTIG51 | 514660 | 515019 | 1.27 | 8.63E-02 | transcription_start_site | + | 518459 | 518459 | -3619 | 14256 | AN2981 |
| 1510 | CONTIG51 | 514660 | 515019 | 1.27 | 8.63E-02 | transcription_start_site | + | 518719 | 518719 | -3879 | 14257 | AN2981 |
| 1510 | CONTIG51 | 514660 | 515019 | 1.27 | 8.63E-02 | transcription_start_site | + | 519148 | 519148 | -4308 | 14258 | AN2981 |
| 1436 | CONTIG51 | 515195 | 516144 | 1.32 | 4.21E-02 | transcription_start_site | + | 520106 | 520106 | -4436 | 14259 | AN2982 |
| 1436 | CONTIG51 | 515195 | 516144 | 1.32 | 4.21E-02 | transcription_start_site | + | 520300 | 520300 | -4630 | 14260 | AN2982 |
| 1436 | CONTIG51 | 515195 | 516144 | 1.32 | 4.21E-02 | transcription_start_site | + | 520493 | 520493 | -4823 | 14261 | AN2982 |
| 1436 | CONTIG51 | 515195 | 516144 | 1.32 | 4.21E-02 | transcription_start_site | + | 520696 | 520696 | -5026 | 14262 | AN2982 |
| 1436 | CONTIG51 | 515195 | 516144 | 1.32 | 4.21E-02 | transcription_start_site | + | 520806 | 520806 | -5136 | 14263 | AN2982 |
| 1436 | CONTIG51 | 515195 | 516144 | 1.32 | 4.21E-02 | transcription_start_site | + | 521000 | 521000 | -5330 | 14264 | AN2982 |

|      |          |        |        |      |          |                          |   |        |        |       |       |        |
|------|----------|--------|--------|------|----------|--------------------------|---|--------|--------|-------|-------|--------|
| 776  | CONTIG51 | 527107 | 527393 | 1.97 | 1.06E-02 | transcription_start_site | - | 526566 | 526566 | -684  | 14267 | AN2983 |
| 776  | CONTIG51 | 527107 | 527393 | 1.97 | 1.06E-02 | transcription_start_site | - | 526291 | 526291 | -959  | 14268 | AN2983 |
| 776  | CONTIG51 | 527107 | 527393 | 1.97 | 1.06E-02 | transcription_start_site | - | 526052 | 526052 | -1198 | 14269 | AN2983 |
| 776  | CONTIG51 | 527107 | 527393 | 1.97 | 1.06E-02 | transcription_start_site | - | 525893 | 525893 | -1357 | 14270 | AN2983 |
| 776  | CONTIG51 | 527107 | 527393 | 1.97 | 1.06E-02 | transcription_start_site | - | 525614 | 525614 | -1636 | 14271 | AN2983 |
| 776  | CONTIG51 | 527107 | 527393 | 1.97 | 1.06E-02 | transcription_start_site | - | 523300 | 523300 | -3950 | 14272 | AN2983 |
| 776  | CONTIG51 | 527107 | 527393 | 1.97 | 1.06E-02 | transcription_start_site | + | 528863 | 528863 | -1613 | 14273 | AN2984 |
| 776  | CONTIG51 | 527107 | 527393 | 1.97 | 1.06E-02 | transcription_start_site | + | 528983 | 528983 | -1733 | 14274 | AN2984 |
| 776  | CONTIG51 | 527107 | 527393 | 1.97 | 1.06E-02 | transcription_start_site | + | 529198 | 529198 | -1948 | 14275 | AN2984 |
| 1991 | CONTIG51 | 533637 | 534148 | 0.95 | 1.57E-01 | transcription_start_site | - | 533683 | 533683 | -209  | 14276 | AN2985 |
| 1991 | CONTIG51 | 533637 | 534148 | 0.95 | 1.57E-01 | transcription_start_site | - | 533329 | 533329 | -563  | 14277 | AN2985 |
| 1991 | CONTIG51 | 533637 | 534148 | 0.95 | 1.57E-01 | transcription_start_site | - | 533246 | 533246 | -646  | 14278 | AN2985 |
| 1991 | CONTIG51 | 533637 | 534148 | 0.95 | 1.57E-01 | transcription_start_site | - | 532881 | 532881 | -1011 | 14279 | AN2985 |
| 1991 | CONTIG51 | 533637 | 534148 | 0.95 | 1.57E-01 | transcription_start_site | - | 532707 | 532707 | -1185 | 14280 | AN2985 |
| 297  | CONTIG51 | 539792 | 540066 | 2.63 | 8.43E-04 | transcription_start_site | - | 535500 | 535500 | -4429 | 14281 | AN2986 |
| 297  | CONTIG51 | 539792 | 540066 | 2.63 | 8.43E-04 | transcription_start_site | - | 535396 | 535396 | -4533 | 14282 | AN2986 |
| 297  | CONTIG51 | 539792 | 540066 | 2.63 | 8.43E-04 | transcription_start_site | - | 535310 | 535310 | -4619 | 14283 | AN2986 |
| 1991 | CONTIG51 | 533637 | 534148 | 0.95 | 1.57E-01 | transcription_start_site | - | 534423 | 534423 | 530   | 14284 | AN2986 |
| 297  | CONTIG51 | 539792 | 540066 | 2.63 | 8.43E-04 | transcription_start_site | - | 537233 | 537233 | -2696 | 14285 | AN2987 |
| 297  | CONTIG51 | 539792 | 540066 | 2.63 | 8.43E-04 | transcription_start_site | - | 536310 | 536310 | -3619 | 14286 | AN2987 |
| 1991 | CONTIG51 | 533637 | 534148 | 0.95 | 1.57E-01 | transcription_start_site | + | 538194 | 538194 | -4301 | 14287 | AN2988 |
| 1991 | CONTIG51 | 533637 | 534148 | 0.95 | 1.57E-01 | transcription_start_site | + | 538339 | 538339 | -4446 | 14288 | AN2988 |
| 1991 | CONTIG51 | 533637 | 534148 | 0.95 | 1.57E-01 | transcription_start_site | + | 538432 | 538432 | -4539 | 14289 | AN2988 |
| 1991 | CONTIG51 | 533637 | 534148 | 0.95 | 1.57E-01 | transcription_start_site | + | 538536 | 538536 | -4643 | 14290 | AN2988 |
| 1991 | CONTIG51 | 533637 | 534148 | 0.95 | 1.57E-01 | transcription_start_site | + | 538611 | 538611 | -4718 | 14291 | AN2988 |
| 1991 | CONTIG51 | 533637 | 534148 | 0.95 | 1.57E-01 | transcription_start_site | + | 538757 | 538757 | -4864 | 14292 | AN2988 |
| 297  | CONTIG51 | 539792 | 540066 | 2.63 | 8.43E-04 | transcription_start_site | - | 540182 | 540182 | 253   | 14296 | AN2989 |
| 297  | CONTIG51 | 539792 | 540066 | 2.63 | 8.43E-04 | transcription_start_site | - | 540341 | 540341 | 412   | 14295 | AN2989 |
| 297  | CONTIG51 | 539792 | 540066 | 2.63 | 8.43E-04 | transcription_start_site | - | 540484 | 540484 | 555   | 14294 | AN2989 |
| 297  | CONTIG51 | 539792 | 540066 | 2.63 | 8.43E-04 | transcription_start_site | - | 540618 | 540618 | 689   | 14293 | AN2989 |
| 297  | CONTIG51 | 539792 | 540066 | 2.63 | 8.43E-04 | transcription_start_site | + | 543979 | 543979 | -4050 | 14297 | AN2990 |
| 297  | CONTIG51 | 539792 | 540066 | 2.63 | 8.43E-04 | transcription_start_site | + | 544111 | 544111 | -4182 | 14298 | AN2990 |
| 1390 | CONTIG51 | 555464 | 555895 | 1.36 | 3.61E-02 | transcription_start_site | - | 553526 | 553526 | -2153 | 14310 | AN2994 |
| 1390 | CONTIG51 | 555464 | 555895 | 1.36 | 3.61E-02 | transcription_start_site | - | 553346 | 553346 | -2333 | 14311 | AN2994 |
| 1390 | CONTIG51 | 555464 | 555895 | 1.36 | 3.61E-02 | transcription_start_site | - | 552776 | 552776 | -2903 | 14312 | AN2994 |
| 1390 | CONTIG51 | 555464 | 555895 | 1.36 | 3.61E-02 | transcription_start_site | - | 555201 | 555201 | -478  | 14313 | AN2995 |
| 1390 | CONTIG51 | 555464 | 555895 | 1.36 | 3.61E-02 | transcription_start_site | - | 555065 | 555065 | -614  | 14314 | AN2995 |
| 1390 | CONTIG51 | 555464 | 555895 | 1.36 | 3.61E-02 | transcription_start_site | - | 554578 | 554578 | -1101 | 14315 | AN2995 |
| 1390 | CONTIG51 | 555464 | 555895 | 1.36 | 3.61E-02 | transcription_start_site | - | 554305 | 554305 | -1374 | 14316 | AN2995 |
| 1390 | CONTIG51 | 555464 | 555895 | 1.36 | 3.61E-02 | transcription_start_site | + | 556138 | 556138 | -458  | 14317 | AN2996 |
| 1390 | CONTIG51 | 555464 | 555895 | 1.36 | 3.61E-02 | transcription_start_site | + | 556356 | 556356 | -676  | 14318 | AN2996 |
| 733  | CONTIG51 | 562884 | 563608 | 2.01 | 3.78E-03 | transcription_start_site | - | 558406 | 558406 | -4840 | 14319 | AN2997 |
| 733  | CONTIG51 | 562884 | 563608 | 2.01 | 3.78E-03 | transcription_start_site | - | 558287 | 558287 | -4959 | 14320 | AN2997 |
| 733  | CONTIG51 | 562884 | 563608 | 2.01 | 3.78E-03 | transcription_start_site | + | 562271 | 562271 | 975   | 14327 | AN2998 |
| 1390 | CONTIG51 | 555464 | 555895 | 1.36 | 3.61E-02 | transcription_start_site | + | 559037 | 559037 | -3357 | 14323 | AN2998 |
| 1390 | CONTIG51 | 555464 | 555895 | 1.36 | 3.61E-02 | transcription_start_site | + | 559498 | 559498 | -3818 | 14324 | AN2998 |
| 1390 | CONTIG51 | 555464 | 555895 | 1.36 | 3.61E-02 | transcription_start_site | + | 559578 | 559578 | -3898 | 14325 | AN2998 |
| 1390 | CONTIG51 | 555464 | 555895 | 1.36 | 3.61E-02 | transcription_start_site | + | 559688 | 559688 | -4008 | 14326 | AN2998 |
| 216  | CONTIG51 | 566044 | 566393 | 2.79 | 2.26E-04 | transcription_start_site | + | 565248 | 565248 | 970   | 14335 | AN2999 |
| 733  | CONTIG51 | 562884 | 563608 | 2.01 | 3.78E-03 | transcription_start_site | + | 563550 | 563550 | -304  | 14328 | AN2999 |
| 733  | CONTIG51 | 562884 | 563608 | 2.01 | 3.78E-03 | transcription_start_site | + | 564142 | 564142 | -896  | 14329 | AN2999 |
| 733  | CONTIG51 | 562884 | 563608 | 2.01 | 3.78E-03 | transcription_start_site | + | 564268 | 564268 | -1022 | 14330 | AN2999 |
| 733  | CONTIG51 | 562884 | 563608 | 2.01 | 3.78E-03 | transcription_start_site | + | 564331 | 564331 | -1085 | 14331 | AN2999 |
| 733  | CONTIG51 | 562884 | 563608 | 2.01 | 3.78E-03 | transcription_start_site | + | 564416 | 564416 | -1170 | 14332 | AN2999 |
| 733  | CONTIG51 | 562884 | 563608 | 2.01 | 3.78E-03 | transcription_start_site | + | 564608 | 564608 | -1362 | 14333 | AN2999 |
| 733  | CONTIG51 | 562884 | 563608 | 2.01 | 3.78E-03 | transcription_start_site | + | 564703 | 564703 | -1457 | 14334 | AN2999 |
| 733  | CONTIG51 | 562884 | 563608 | 2.01 | 3.78E-03 | transcription_start_site | + | 565248 | 565248 | -2002 | 14335 | AN2999 |

|      |          |        |        |      |          |                          |   |        |        |       |       |        |
|------|----------|--------|--------|------|----------|--------------------------|---|--------|--------|-------|-------|--------|
| 216  | CONTIG51 | 566044 | 566393 | 2.79 | 2.26E-04 | transcription_start_site | + | 568306 | 568306 | -2087 | 14336 | AN3000 |
| 609  | CONTIG51 | 568954 | 570218 | 2.18 | 6.24E-03 | transcription_start_site | + | 568306 | 568306 | 1280  | 14336 | AN3000 |
| 733  | CONTIG51 | 562884 | 563608 | 2.01 | 3.78E-03 | transcription_start_site | + | 568306 | 568306 | -5060 | 14336 | AN3000 |
| 216  | CONTIG51 | 566044 | 566393 | 2.79 | 2.26E-04 | transcription_start_site | + | 570560 | 570560 | -4341 | 14337 | AN3001 |
| 609  | CONTIG51 | 568954 | 570218 | 2.18 | 6.24E-03 | transcription_start_site | + | 570560 | 570560 | -974  | 14337 | AN3001 |
| 1255 | CONTIG51 | 582226 | 582529 | 1.48 | 4.78E-02 | transcription_start_site | - | 582020 | 582020 | -357  | 14344 | AN3005 |
| 1255 | CONTIG51 | 582226 | 582529 | 1.48 | 4.78E-02 | transcription_start_site | - | 581858 | 581858 | -519  | 14345 | AN3005 |
| 1255 | CONTIG51 | 582226 | 582529 | 1.48 | 4.78E-02 | transcription_start_site | - | 580256 | 580256 | -2121 | 14346 | AN3005 |
| 1255 | CONTIG51 | 582226 | 582529 | 1.48 | 4.78E-02 | transcription_start_site | - | 583419 | 583419 | 1041  | 14348 | AN3006 |
| 1255 | CONTIG51 | 582226 | 582529 | 1.48 | 4.78E-02 | transcription_start_site | + | 587469 | 587469 | -5091 | 14356 | AN3009 |
| 367  | CONTIG51 | 615453 | 615729 | 2.51 | 1.62E-03 | transcription_start_site | - | 613246 | 613246 | -2345 | 14393 | AN3019 |
| 367  | CONTIG51 | 615453 | 615729 | 2.51 | 1.62E-03 | transcription_start_site | - | 612619 | 612619 | -2972 | 14394 | AN3019 |
| 367  | CONTIG51 | 615453 | 615729 | 2.51 | 1.62E-03 | transcription_start_site | - | 615520 | 615520 | -71   | 14398 | AN3020 |
| 367  | CONTIG51 | 615453 | 615729 | 2.51 | 1.62E-03 | transcription_start_site | - | 615130 | 615130 | -461  | 14399 | AN3020 |
| 367  | CONTIG51 | 615453 | 615729 | 2.51 | 1.62E-03 | transcription_start_site | - | 616159 | 616159 | 568   | 14397 | AN3020 |
| 367  | CONTIG51 | 615453 | 615729 | 2.51 | 1.62E-03 | transcription_start_site | + | 619952 | 619952 | -4361 | 14400 | AN3021 |
| 367  | CONTIG51 | 615453 | 615729 | 2.51 | 1.62E-03 | transcription_start_site | + | 620646 | 620646 | -5055 | 14401 | AN3021 |
| 838  | CONTIG51 | 623556 | 623923 | 1.89 | 1.37E-02 | transcription_start_site | + | 622667 | 622667 | 1072  | 14406 | AN3021 |
| 838  | CONTIG51 | 623556 | 623923 | 1.89 | 1.37E-02 | transcription_start_site | + | 623986 | 623986 | -246  | 14407 | AN3022 |
| 838  | CONTIG51 | 623556 | 623923 | 1.89 | 1.37E-02 | transcription_start_site | + | 624180 | 624180 | -440  | 14408 | AN3022 |
| 838  | CONTIG51 | 623556 | 623923 | 1.89 | 1.37E-02 | transcription_start_site | + | 624396 | 624396 | -656  | 14409 | AN3022 |
| 838  | CONTIG51 | 623556 | 623923 | 1.89 | 1.37E-02 | transcription_start_site | + | 625196 | 625196 | -1456 | 14410 | AN3022 |
| 1749 | CONTIG51 | 648471 | 648970 | 1.11 | 1.38E-01 | transcription_start_site | - | 647020 | 647020 | -1700 | 14447 | AN3032 |
| 1749 | CONTIG51 | 648471 | 648970 | 1.11 | 1.38E-01 | transcription_start_site | - | 646809 | 646809 | -1911 | 14448 | AN3032 |
| 1749 | CONTIG51 | 648471 | 648970 | 1.11 | 1.38E-01 | transcription_start_site | + | 648693 | 648693 | 27    | 14449 | AN3033 |
| 1749 | CONTIG51 | 648471 | 648970 | 1.11 | 1.38E-01 | transcription_start_site | + | 648980 | 648980 | -259  | 14450 | AN3033 |
| 1749 | CONTIG51 | 648471 | 648970 | 1.11 | 1.38E-01 | transcription_start_site | + | 649233 | 649233 | -512  | 14451 | AN3033 |
| 1749 | CONTIG51 | 648471 | 648970 | 1.11 | 1.38E-01 | transcription_start_site | + | 653535 | 653535 | -4814 | 14457 | AN3035 |
| 1749 | CONTIG51 | 648471 | 648970 | 1.11 | 1.38E-01 | transcription_start_site | + | 653606 | 653606 | -4885 | 14458 | AN3035 |
| 1749 | CONTIG51 | 648471 | 648970 | 1.11 | 1.38E-01 | transcription_start_site | + | 653807 | 653807 | -5086 | 14459 | AN3035 |
| 1738 | CONTIG51 | 675758 | 676180 | 1.11 | 8.54E-02 | transcription_start_site | - | 673480 | 673480 | -2489 | 14477 | AN3041 |
| 1738 | CONTIG51 | 675758 | 676180 | 1.11 | 8.54E-02 | transcription_start_site | - | 673260 | 673260 | -2709 | 14478 | AN3041 |
| 1738 | CONTIG51 | 675758 | 676180 | 1.11 | 8.54E-02 | transcription_start_site | - | 672993 | 672993 | -2976 | 14479 | AN3041 |
| 1738 | CONTIG51 | 675758 | 676180 | 1.11 | 8.54E-02 | transcription_start_site | - | 672852 | 672852 | -3117 | 14480 | AN3041 |
| 1738 | CONTIG51 | 675758 | 676180 | 1.11 | 8.54E-02 | transcription_start_site | - | 672622 | 672622 | -3347 | 14481 | AN3041 |
| 1738 | CONTIG51 | 675758 | 676180 | 1.11 | 8.54E-02 | transcription_start_site | - | 672138 | 672138 | -3831 | 14482 | AN3041 |
| 1738 | CONTIG51 | 675758 | 676180 | 1.11 | 8.54E-02 | transcription_start_site | - | 674925 | 674925 | -1044 | 14483 | AN3042 |
| 1738 | CONTIG51 | 675758 | 676180 | 1.11 | 8.54E-02 | transcription_start_site | + | 677933 | 677933 | -1964 | 14484 | AN3043 |
| 1738 | CONTIG51 | 675758 | 676180 | 1.11 | 8.54E-02 | transcription_start_site | + | 678125 | 678125 | -2156 | 14485 | AN3043 |
| 1738 | CONTIG51 | 675758 | 676180 | 1.11 | 8.54E-02 | transcription_start_site | + | 678784 | 678784 | -2815 | 14486 | AN3043 |
| 2064 | CONTIG51 | 681083 | 682127 | 0.9  | 4.39E-02 | transcription_start_site | - | 681295 | 681295 | -310  | 14487 | AN3044 |
| 2064 | CONTIG51 | 681083 | 682127 | 0.9  | 4.39E-02 | transcription_start_site | - | 680432 | 680432 | -1173 | 14488 | AN3044 |
| 2064 | CONTIG51 | 681083 | 682127 | 0.9  | 4.39E-02 | transcription_start_site | - | 680191 | 680191 | -1414 | 14489 | AN3044 |
| 2064 | CONTIG51 | 681083 | 682127 | 0.9  | 4.39E-02 | transcription_start_site | - | 680084 | 680084 | -1521 | 14490 | AN3044 |
| 2064 | CONTIG51 | 681083 | 682127 | 0.9  | 4.39E-02 | transcription_start_site | - | 679953 | 679953 | -1652 | 14491 | AN3044 |
| 2064 | CONTIG51 | 681083 | 682127 | 0.9  | 4.39E-02 | transcription_start_site | - | 679687 | 679687 | -1918 | 14492 | AN3044 |
| 2064 | CONTIG51 | 681083 | 682127 | 0.9  | 4.39E-02 | transcription_start_site | + | 685861 | 685861 | -4256 | 14497 | AN3046 |
| 2064 | CONTIG51 | 681083 | 682127 | 0.9  | 4.39E-02 | transcription_start_site | + | 686483 | 686483 | -4878 | 14498 | AN3046 |
| 2064 | CONTIG51 | 681083 | 682127 | 0.9  | 4.39E-02 | transcription_start_site | + | 686584 | 686584 | -4979 | 14499 | AN3046 |
| 1173 | CONTIG51 | 712365 | 712709 | 1.56 | 3.70E-02 | transcription_start_site | - | 707495 | 707495 | -5042 | 14521 | AN3052 |
| 1173 | CONTIG51 | 712365 | 712709 | 1.56 | 3.70E-02 | transcription_start_site | - | 711998 | 711998 | -539  | 14522 | AN3053 |
| 1173 | CONTIG51 | 712365 | 712709 | 1.56 | 3.70E-02 | transcription_start_site | - | 711150 | 711150 | -1387 | 14523 | AN3053 |
| 1173 | CONTIG51 | 712365 | 712709 | 1.56 | 3.70E-02 | transcription_start_site | + | 717365 | 717365 | -4828 | 14535 | AN3055 |
| 1438 | CONTIG51 | 725790 | 726144 | 1.32 | 7.66E-02 | transcription_start_site | - | 724414 | 724414 | -1553 | 14541 | AN3058 |
| 1438 | CONTIG51 | 725790 | 726144 | 1.32 | 7.66E-02 | transcription_start_site | - | 724313 | 724313 | -1654 | 14542 | AN3058 |
| 1438 | CONTIG51 | 725790 | 726144 | 1.32 | 7.66E-02 | transcription_start_site | - | 724166 | 724166 | -1801 | 14543 | AN3058 |
| 1438 | CONTIG51 | 725790 | 726144 | 1.32 | 7.66E-02 | transcription_start_site | - | 723745 | 723745 | -2222 | 14544 | AN3058 |

|      |          |        |        |      |          |                          |   |        |        |       |       |        |
|------|----------|--------|--------|------|----------|--------------------------|---|--------|--------|-------|-------|--------|
| 1438 | CONTIG51 | 725790 | 726144 | 1.32 | 7.66E-02 | transcription_start_site | + | 726267 | 726267 | -300  | 14545 | AN3059 |
| 1438 | CONTIG51 | 725790 | 726144 | 1.32 | 7.66E-02 | transcription_start_site | + | 726366 | 726366 | -399  | 14546 | AN3059 |
| 1438 | CONTIG51 | 725790 | 726144 | 1.32 | 7.66E-02 | transcription_start_site | + | 727748 | 727748 | -1781 | 14547 | AN3059 |
| 1438 | CONTIG51 | 725790 | 726144 | 1.32 | 7.66E-02 | transcription_start_site | + | 729460 | 729460 | -3493 | 14552 | AN3061 |
| 1438 | CONTIG51 | 725790 | 726144 | 1.32 | 7.66E-02 | transcription_start_site | + | 729832 | 729832 | -3865 | 14553 | AN3061 |
| 1438 | CONTIG51 | 725790 | 726144 | 1.32 | 7.66E-02 | transcription_start_site | + | 730217 | 730217 | -4250 | 14554 | AN3061 |
| 1438 | CONTIG51 | 725790 | 726144 | 1.32 | 7.66E-02 | transcription_start_site | + | 730720 | 730720 | -4753 | 14555 | AN3061 |
| 364  | CONTIG51 | 768605 | 769642 | 2.51 | 0.00E+00 | transcription_start_site | + | 770027 | 770027 | -903  | 14592 | AN3074 |
| 364  | CONTIG51 | 768605 | 769642 | 2.51 | 0.00E+00 | transcription_start_site | + | 770405 | 770405 | -1281 | 14593 | AN3074 |
| 364  | CONTIG51 | 768605 | 769642 | 2.51 | 0.00E+00 | transcription_start_site | + | 770742 | 770742 | -1618 | 14594 | AN3074 |
| 368  | CONTIG51 | 769970 | 770394 | 2.51 | 1.62E-03 | transcription_start_site | + | 770027 | 770027 | 155   | 14592 | AN3074 |
| 368  | CONTIG51 | 769970 | 770394 | 2.51 | 1.62E-03 | transcription_start_site | + | 770405 | 770405 | -223  | 14593 | AN3074 |
| 368  | CONTIG51 | 769970 | 770394 | 2.51 | 1.62E-03 | transcription_start_site | + | 770742 | 770742 | -560  | 14594 | AN3074 |
| 610  | CONTIG51 | 779490 | 779909 | 2.18 | 6.24E-03 | transcription_start_site | - | 777501 | 777501 | -2198 | 14595 | AN3075 |
| 610  | CONTIG51 | 779490 | 779909 | 2.18 | 6.24E-03 | transcription_start_site | - | 776835 | 776835 | -2864 | 14596 | AN3075 |
| 610  | CONTIG51 | 779490 | 779909 | 2.18 | 6.24E-03 | transcription_start_site | - | 776702 | 776702 | -2997 | 14597 | AN3075 |
| 1200 | CONTIG51 | 776627 | 777965 | 1.52 | 9.64E-03 | transcription_start_site | - | 777501 | 777501 | 205   | 14595 | AN3075 |
| 1200 | CONTIG51 | 776627 | 777965 | 1.52 | 9.64E-03 | transcription_start_site | - | 776835 | 776835 | -461  | 14596 | AN3075 |
| 1200 | CONTIG51 | 776627 | 777965 | 1.52 | 9.64E-03 | transcription_start_site | - | 776702 | 776702 | -594  | 14597 | AN3075 |
| 1675 | CONTIG51 | 778217 | 779154 | 1.15 | 5.43E-02 | transcription_start_site | - | 777501 | 777501 | -1184 | 14595 | AN3075 |
| 1675 | CONTIG51 | 778217 | 779154 | 1.15 | 5.43E-02 | transcription_start_site | - | 776835 | 776835 | -1850 | 14596 | AN3075 |
| 1675 | CONTIG51 | 778217 | 779154 | 1.15 | 5.43E-02 | transcription_start_site | - | 776702 | 776702 | -1983 | 14597 | AN3075 |
| 610  | CONTIG51 | 779490 | 779909 | 2.18 | 6.24E-03 | transcription_start_site | + | 779937 | 779937 | -237  | 14598 | AN3076 |
| 610  | CONTIG51 | 779490 | 779909 | 2.18 | 6.24E-03 | transcription_start_site | + | 780455 | 780455 | -755  | 14599 | AN3076 |
| 610  | CONTIG51 | 779490 | 779909 | 2.18 | 6.24E-03 | transcription_start_site | + | 780754 | 780754 | -1054 | 14600 | AN3076 |
| 1200 | CONTIG51 | 776627 | 777965 | 1.52 | 9.64E-03 | transcription_start_site | + | 779937 | 779937 | -2641 | 14598 | AN3076 |
| 1200 | CONTIG51 | 776627 | 777965 | 1.52 | 9.64E-03 | transcription_start_site | + | 780455 | 780455 | -3159 | 14599 | AN3076 |
| 1200 | CONTIG51 | 776627 | 777965 | 1.52 | 9.64E-03 | transcription_start_site | + | 780754 | 780754 | -3458 | 14600 | AN3076 |
| 1675 | CONTIG51 | 778217 | 779154 | 1.15 | 5.43E-02 | transcription_start_site | + | 779937 | 779937 | -1251 | 14598 | AN3076 |
| 1675 | CONTIG51 | 778217 | 779154 | 1.15 | 5.43E-02 | transcription_start_site | + | 780455 | 780455 | -1769 | 14599 | AN3076 |
| 1675 | CONTIG51 | 778217 | 779154 | 1.15 | 5.43E-02 | transcription_start_site | + | 780754 | 780754 | -2068 | 14600 | AN3076 |
| 6    | CONTIG51 | 792093 | 792657 | 3.58 | 0.00E+00 | transcription_start_site | - | 787945 | 787945 | -4430 | 14601 | AN3077 |
| 6    | CONTIG51 | 792093 | 792657 | 3.58 | 0.00E+00 | transcription_start_site | - | 787652 | 787652 | -4723 | 14602 | AN3077 |
| 122  | CONTIG51 | 789833 | 790342 | 3.04 | 0.00E+00 | transcription_start_site | - | 787945 | 787945 | -2142 | 14601 | AN3077 |
| 122  | CONTIG51 | 789833 | 790342 | 3.04 | 0.00E+00 | transcription_start_site | - | 787652 | 787652 | -2435 | 14602 | AN3077 |
| 122  | CONTIG51 | 789833 | 790342 | 3.04 | 0.00E+00 | transcription_start_site | + | 789676 | 789676 | 411   | 14604 | AN3078 |
| 122  | CONTIG51 | 789833 | 790342 | 3.04 | 0.00E+00 | transcription_start_site | + | 789496 | 789496 | 591   | 14603 | AN3078 |
| 6    | CONTIG51 | 792093 | 792657 | 3.58 | 0.00E+00 | transcription_start_site | - | 791804 | 791804 | -571  | 14605 | AN3079 |
| 6    | CONTIG51 | 792093 | 792657 | 3.58 | 0.00E+00 | transcription_start_site | - | 793592 | 793592 | 1217  | 14610 | AN3080 |
| 6    | CONTIG51 | 792093 | 792657 | 3.58 | 0.00E+00 | transcription_start_site | + | 796662 | 796662 | -4287 | 14611 | AN3081 |
| 6    | CONTIG51 | 792093 | 792657 | 3.58 | 0.00E+00 | transcription_start_site | + | 796769 | 796769 | -4394 | 14612 | AN3081 |
| 6    | CONTIG51 | 792093 | 792657 | 3.58 | 0.00E+00 | transcription_start_site | + | 797218 | 797218 | -4843 | 14613 | AN3081 |
| 6    | CONTIG51 | 792093 | 792657 | 3.58 | 0.00E+00 | transcription_start_site | + | 797430 | 797430 | -5055 | 14614 | AN3081 |
| 6    | CONTIG51 | 792093 | 792657 | 3.58 | 0.00E+00 | transcription_start_site | + | 797614 | 797614 | -5239 | 14615 | AN3081 |
| 341  | CONTIG51 | 812493 | 812913 | 2.55 | 1.45E-03 | transcription_start_site | - | 811986 | 811986 | -717  | 14626 | AN3085 |
| 341  | CONTIG51 | 812493 | 812913 | 2.55 | 1.45E-03 | transcription_start_site | - | 811531 | 811531 | -1172 | 14627 | AN3085 |
| 574  | CONTIG51 | 818328 | 818602 | 2.22 | 5.08E-03 | transcription_start_site | - | 816393 | 816393 | -2072 | 14628 | AN3086 |
| 574  | CONTIG51 | 818328 | 818602 | 2.22 | 5.08E-03 | transcription_start_site | + | 819112 | 819112 | -647  | 14629 | AN3087 |
| 574  | CONTIG51 | 818328 | 818602 | 2.22 | 5.08E-03 | transcription_start_site | + | 819521 | 819521 | -1056 | 14630 | AN3087 |
| 574  | CONTIG51 | 818328 | 818602 | 2.22 | 5.08E-03 | transcription_start_site | + | 821284 | 821284 | -2819 | 14631 | AN3088 |
| 574  | CONTIG51 | 818328 | 818602 | 2.22 | 5.08E-03 | transcription_start_site | + | 821419 | 821419 | -2954 | 14632 | AN3088 |
| 574  | CONTIG51 | 818328 | 818602 | 2.22 | 5.08E-03 | transcription_start_site | + | 821550 | 821550 | -3085 | 14633 | AN3088 |
| 574  | CONTIG51 | 818328 | 818602 | 2.22 | 5.08E-03 | transcription_start_site | + | 821733 | 821733 | -3268 | 14634 | AN3088 |
| 574  | CONTIG51 | 818328 | 818602 | 2.22 | 5.08E-03 | transcription_start_site | + | 821944 | 821944 | -3479 | 14635 | AN3088 |
| 574  | CONTIG51 | 818328 | 818602 | 2.22 | 5.08E-03 | transcription_start_site | + | 822114 | 822114 | -3649 | 14636 | AN3088 |
| 1560 | CONTIG51 | 825979 | 826253 | 1.23 | 9.60E-02 | transcription_start_site | - | 824924 | 824924 | -1192 | 14637 | AN3089 |
| 1560 | CONTIG51 | 825979 | 826253 | 1.23 | 9.60E-02 | transcription_start_site | - | 824515 | 824515 | -1601 | 14638 | AN3089 |

|      |          |        |        |      |          |                          |   |        |        |       |       |        |
|------|----------|--------|--------|------|----------|--------------------------|---|--------|--------|-------|-------|--------|
| 1808 | CONTIG51 | 824863 | 825287 | 1.07 | 1.54E-01 | transcription_start_site | - | 824924 | 824924 | -151  | 14637 | AN3089 |
| 1808 | CONTIG51 | 824863 | 825287 | 1.07 | 1.54E-01 | transcription_start_site | - | 824515 | 824515 | -560  | 14638 | AN3089 |
| 1560 | CONTIG51 | 825979 | 826253 | 1.23 | 9.60E-02 | transcription_start_site | - | 826103 | 826103 | -13   | 14643 | AN3090 |
| 1560 | CONTIG51 | 825979 | 826253 | 1.23 | 9.60E-02 | transcription_start_site | - | 826414 | 826414 | 298   | 14642 | AN3090 |
| 1560 | CONTIG51 | 825979 | 826253 | 1.23 | 9.60E-02 | transcription_start_site | - | 826626 | 826626 | 510   | 14641 | AN3090 |
| 1560 | CONTIG51 | 825979 | 826253 | 1.23 | 9.60E-02 | transcription_start_site | - | 826883 | 826883 | 767   | 14640 | AN3090 |
| 1560 | CONTIG51 | 825979 | 826253 | 1.23 | 9.60E-02 | transcription_start_site | - | 827066 | 827066 | 950   | 14639 | AN3090 |
| 1808 | CONTIG51 | 824863 | 825287 | 1.07 | 1.54E-01 | transcription_start_site | - | 826103 | 826103 | 1028  | 14643 | AN3090 |
| 1809 | CONTIG51 | 834694 | 835028 | 1.07 | 1.54E-01 | transcription_start_site | + | 834033 | 834033 | 828   | 14650 | AN3091 |
| 1809 | CONTIG51 | 834694 | 835028 | 1.07 | 1.54E-01 | transcription_start_site | + | 835952 | 835952 | -1091 | 14651 | AN3092 |
| 1809 | CONTIG51 | 834694 | 835028 | 1.07 | 1.54E-01 | transcription_start_site | + | 836426 | 836426 | -1565 | 14652 | AN3092 |
| 1875 | CONTIG51 | 853655 | 854009 | 1.03 | 1.76E-01 | transcription_start_site | - | 850757 | 850757 | -3075 | 14659 | AN3094 |
| 1875 | CONTIG51 | 853655 | 854009 | 1.03 | 1.76E-01 | transcription_start_site | - | 853502 | 853502 | -330  | 14661 | AN3095 |
| 1875 | CONTIG51 | 853655 | 854009 | 1.03 | 1.76E-01 | transcription_start_site | - | 853338 | 853338 | -494  | 14662 | AN3095 |
| 1875 | CONTIG51 | 853655 | 854009 | 1.03 | 1.76E-01 | transcription_start_site | - | 853213 | 853213 | -619  | 14663 | AN3095 |
| 1875 | CONTIG51 | 853655 | 854009 | 1.03 | 1.76E-01 | transcription_start_site | - | 852678 | 852678 | -1154 | 14664 | AN3095 |
| 1875 | CONTIG51 | 853655 | 854009 | 1.03 | 1.76E-01 | transcription_start_site | - | 852340 | 852340 | -1492 | 14665 | AN3095 |
| 1875 | CONTIG51 | 853655 | 854009 | 1.03 | 1.76E-01 | transcription_start_site | + | 854014 | 854014 | -182  | 14666 | AN3096 |
| 1875 | CONTIG51 | 853655 | 854009 | 1.03 | 1.76E-01 | transcription_start_site | + | 854374 | 854374 | -542  | 14667 | AN3096 |
| 1875 | CONTIG51 | 853655 | 854009 | 1.03 | 1.76E-01 | transcription_start_site | + | 854833 | 854833 | -1001 | 14668 | AN3096 |
| 1875 | CONTIG51 | 853655 | 854009 | 1.03 | 1.76E-01 | transcription_start_site | + | 855129 | 855129 | -1297 | 14669 | AN3096 |
| 1875 | CONTIG51 | 853655 | 854009 | 1.03 | 1.76E-01 | transcription_start_site | + | 857609 | 857609 | -3777 | 14673 | AN3098 |
| 1875 | CONTIG51 | 853655 | 854009 | 1.03 | 1.76E-01 | transcription_start_site | + | 857782 | 857782 | -3950 | 14674 | AN3098 |
| 1875 | CONTIG51 | 853655 | 854009 | 1.03 | 1.76E-01 | transcription_start_site | + | 857985 | 857985 | -4153 | 14675 | AN3098 |
| 1875 | CONTIG51 | 853655 | 854009 | 1.03 | 1.76E-01 | transcription_start_site | + | 858350 | 858350 | -4518 | 14676 | AN3098 |
| 1875 | CONTIG51 | 853655 | 854009 | 1.03 | 1.76E-01 | transcription_start_site | + | 858986 | 858986 | -5154 | 14677 | AN3098 |
| 19   | CONTIG51 | 876458 | 876887 | 3.45 | 0.00E+00 | transcription_start_site | - | 874661 | 874661 | -2011 | 14682 | AN3101 |
| 19   | CONTIG51 | 876458 | 876887 | 3.45 | 0.00E+00 | transcription_start_site | + | 877650 | 877650 | -977  | 14685 | AN3102 |
| 19   | CONTIG51 | 876458 | 876887 | 3.45 | 0.00E+00 | transcription_start_site | + | 878107 | 878107 | -1434 | 14686 | AN3102 |
| 19   | CONTIG51 | 876458 | 876887 | 3.45 | 0.00E+00 | transcription_start_site | + | 878565 | 878565 | -1892 | 14687 | AN3102 |
| 19   | CONTIG51 | 876458 | 876887 | 3.45 | 0.00E+00 | transcription_start_site | + | 881194 | 881194 | -4521 | 14688 | AN3102 |
| 835  | CONTIG51 | 915695 | 916188 | 1.89 | 5.38E-03 | transcription_start_site | - | 913774 | 913774 | -2167 | 14712 | AN3112 |
| 835  | CONTIG51 | 915695 | 916188 | 1.89 | 5.38E-03 | transcription_start_site | - | 913627 | 913627 | -2314 | 14713 | AN3112 |
| 835  | CONTIG51 | 915695 | 916188 | 1.89 | 5.38E-03 | transcription_start_site | - | 913503 | 913503 | -2438 | 14714 | AN3112 |
| 835  | CONTIG51 | 915695 | 916188 | 1.89 | 5.38E-03 | transcription_start_site | - | 913365 | 913365 | -2576 | 14715 | AN3112 |
| 835  | CONTIG51 | 915695 | 916188 | 1.89 | 5.38E-03 | transcription_start_site | - | 912948 | 912948 | -2993 | 14716 | AN3112 |
| 835  | CONTIG51 | 915695 | 916188 | 1.89 | 5.38E-03 | transcription_start_site | - | 912470 | 912470 | -3471 | 14717 | AN3112 |
| 249  | CONTIG51 | 918913 | 919492 | 2.71 | 3.81E-04 | transcription_start_site | + | 918022 | 918022 | 1180  | 14722 | AN3113 |
| 835  | CONTIG51 | 915695 | 916188 | 1.89 | 5.38E-03 | transcription_start_site | + | 916945 | 916945 | -1003 | 14718 | AN3113 |
| 835  | CONTIG51 | 915695 | 916188 | 1.89 | 5.38E-03 | transcription_start_site | + | 917140 | 917140 | -1198 | 14719 | AN3113 |
| 835  | CONTIG51 | 915695 | 916188 | 1.89 | 5.38E-03 | transcription_start_site | + | 917280 | 917280 | -1338 | 14720 | AN3113 |
| 835  | CONTIG51 | 915695 | 916188 | 1.89 | 5.38E-03 | transcription_start_site | + | 917562 | 917562 | -1620 | 14721 | AN3113 |
| 835  | CONTIG51 | 915695 | 916188 | 1.89 | 5.38E-03 | transcription_start_site | + | 918022 | 918022 | -2080 | 14722 | AN3113 |
| 249  | CONTIG51 | 918913 | 919492 | 2.71 | 3.81E-04 | transcription_start_site | + | 919849 | 919849 | -646  | 14723 | AN3114 |
| 835  | CONTIG51 | 915695 | 916188 | 1.89 | 5.38E-03 | transcription_start_site | + | 919849 | 919849 | -3907 | 14723 | AN3114 |
| 1248 | CONTIG51 | 939379 | 940556 | 1.48 | 1.35E-02 | transcription_start_site | - | 934928 | 934928 | -5039 | 14738 | AN3118 |
| 1248 | CONTIG51 | 939379 | 940556 | 1.48 | 1.35E-02 | transcription_start_site | - | 934668 | 934668 | -5299 | 14739 | AN3118 |
| 1248 | CONTIG51 | 939379 | 940556 | 1.48 | 1.35E-02 | transcription_start_site | - | 934491 | 934491 | -5476 | 14740 | AN3118 |
| 1248 | CONTIG51 | 939379 | 940556 | 1.48 | 1.35E-02 | transcription_start_site | - | 936207 | 936207 | -3760 | 14743 | AN3119 |
| 1248 | CONTIG51 | 939379 | 940556 | 1.48 | 1.35E-02 | transcription_start_site | + | 938556 | 938556 | 1411  | 14747 | AN3120 |
| 1248 | CONTIG51 | 939379 | 940556 | 1.48 | 1.35E-02 | transcription_start_site | + | 940604 | 940604 | -636  | 14748 | AN3121 |
| 1248 | CONTIG51 | 939379 | 940556 | 1.48 | 1.35E-02 | transcription_start_site | + | 941011 | 941011 | -1043 | 14749 | AN3121 |
| 1248 | CONTIG51 | 939379 | 940556 | 1.48 | 1.35E-02 | transcription_start_site | + | 941193 | 941193 | -1225 | 14750 | AN3121 |
| 1248 | CONTIG51 | 939379 | 940556 | 1.48 | 1.35E-02 | transcription_start_site | + | 945472 | 945472 | -5504 | 14758 | AN3123 |
| 217  | CONTIG51 | 954983 | 955342 | 2.79 | 2.26E-04 | transcription_start_site | - | 954808 | 954808 | -354  | 14762 | AN3124 |
| 217  | CONTIG51 | 954983 | 955342 | 2.79 | 2.26E-04 | transcription_start_site | - | 954405 | 954405 | -757  | 14763 | AN3124 |
| 217  | CONTIG51 | 954983 | 955342 | 2.79 | 2.26E-04 | transcription_start_site | - | 953344 | 953344 | -1818 | 14764 | AN3124 |

|      |          |         |         |      |          |                          |   |         |         |       |       |        |
|------|----------|---------|---------|------|----------|--------------------------|---|---------|---------|-------|-------|--------|
| 217  | CONTIG51 | 954983  | 955342  | 2.79 | 2.26E-04 | transcription_start_site | - | 953166  | 953166  | -1996 | 14765 | AN3124 |
| 217  | CONTIG51 | 954983  | 955342  | 2.79 | 2.26E-04 | transcription_start_site | - | 952597  | 952597  | -2565 | 14766 | AN3124 |
| 217  | CONTIG51 | 954983  | 955342  | 2.79 | 2.26E-04 | transcription_start_site | - | 952480  | 952480  | -2682 | 14767 | AN3124 |
| 217  | CONTIG51 | 954983  | 955342  | 2.79 | 2.26E-04 | transcription_start_site | + | 955500  | 955500  | -337  | 14768 | AN3125 |
| 217  | CONTIG51 | 954983  | 955342  | 2.79 | 2.26E-04 | transcription_start_site | + | 955571  | 955571  | -408  | 14769 | AN3125 |
| 217  | CONTIG51 | 954983  | 955342  | 2.79 | 2.26E-04 | transcription_start_site | + | 955717  | 955717  | -554  | 14770 | AN3125 |
| 217  | CONTIG51 | 954983  | 955342  | 2.79 | 2.26E-04 | transcription_start_site | + | 955915  | 955915  | -752  | 14771 | AN3125 |
| 180  | CONTIG51 | 967663  | 968242  | 2.88 | 2.69E-04 | transcription_start_site | + | 969035  | 969035  | -1082 | 14775 | AN3129 |
| 180  | CONTIG51 | 967663  | 968242  | 2.88 | 2.69E-04 | transcription_start_site | + | 969389  | 969389  | -1436 | 14776 | AN3129 |
| 180  | CONTIG51 | 967663  | 968242  | 2.88 | 2.69E-04 | transcription_start_site | + | 969731  | 969731  | -1778 | 14777 | AN3129 |
| 180  | CONTIG51 | 967663  | 968242  | 2.88 | 2.69E-04 | transcription_start_site | + | 970605  | 970605  | -2652 | 14778 | AN3129 |
| 180  | CONTIG51 | 967663  | 968242  | 2.88 | 2.69E-04 | transcription_start_site | + | 970739  | 970739  | -2786 | 14779 | AN3129 |
| 421  | CONTIG51 | 963903  | 964262  | 2.42 | 1.20E-03 | transcription_start_site | + | 969035  | 969035  | -4952 | 14775 | AN3129 |
| 992  | CONTIG51 | 994817  | 995090  | 1.73 | 2.29E-02 | transcription_start_site | - | 994744  | 994744  | -209  | 14804 | AN3139 |
| 992  | CONTIG51 | 994817  | 995090  | 1.73 | 2.29E-02 | transcription_start_site | - | 994308  | 994308  | -645  | 14805 | AN3139 |
| 992  | CONTIG51 | 994817  | 995090  | 1.73 | 2.29E-02 | transcription_start_site | - | 994103  | 994103  | -850  | 14806 | AN3139 |
| 992  | CONTIG51 | 994817  | 995090  | 1.73 | 2.29E-02 | transcription_start_site | + | 995165  | 995165  | -211  | 14807 | AN3140 |
| 992  | CONTIG51 | 994817  | 995090  | 1.73 | 2.29E-02 | transcription_start_site | + | 995780  | 995780  | -826  | 14808 | AN3140 |
| 992  | CONTIG51 | 994817  | 995090  | 1.73 | 2.29E-02 | transcription_start_site | + | 996436  | 996436  | -1482 | 14809 | AN3140 |
| 839  | CONTIG51 | 1004795 | 1005087 | 1.89 | 1.37E-02 | transcription_start_site | - | 1000937 | 1000937 | -4004 | 14810 | AN3141 |
| 839  | CONTIG51 | 1004795 | 1005087 | 1.89 | 1.37E-02 | transcription_start_site | - | 1000815 | 1000815 | -4126 | 14811 | AN3141 |
| 839  | CONTIG51 | 1004795 | 1005087 | 1.89 | 1.37E-02 | transcription_start_site | - | 1000565 | 1000565 | -4376 | 14812 | AN3141 |
| 1430 | CONTIG51 | 1005245 | 1006036 | 1.32 | 2.88E-02 | transcription_start_site | - | 1000937 | 1000937 | -4703 | 14810 | AN3141 |
| 1430 | CONTIG51 | 1005245 | 1006036 | 1.32 | 2.88E-02 | transcription_start_site | - | 1000815 | 1000815 | -4825 | 14811 | AN3141 |
| 1430 | CONTIG51 | 1005245 | 1006036 | 1.32 | 2.88E-02 | transcription_start_site | - | 1000565 | 1000565 | -5075 | 14812 | AN3141 |
| 839  | CONTIG51 | 1004795 | 1005087 | 1.89 | 1.37E-02 | transcription_start_site | - | 1004091 | 1004091 | -850  | 14813 | AN3142 |
| 839  | CONTIG51 | 1004795 | 1005087 | 1.89 | 1.37E-02 | transcription_start_site | - | 1003122 | 1003122 | -1819 | 14814 | AN3142 |
| 1430 | CONTIG51 | 1005245 | 1006036 | 1.32 | 2.88E-02 | transcription_start_site | - | 1004091 | 1004091 | -1549 | 14813 | AN3142 |
| 1430 | CONTIG51 | 1005245 | 1006036 | 1.32 | 2.88E-02 | transcription_start_site | - | 1003122 | 1003122 | -2518 | 14814 | AN3142 |
| 427  | CONTIG51 | 1012353 | 1012705 | 2.42 | 2.32E-03 | transcription_start_site | - | 1010983 | 1010983 | -1546 | 14815 | AN3143 |
| 883  | CONTIG51 | 1013263 | 1013757 | 1.85 | 1.54E-02 | transcription_start_site | - | 1010983 | 1010983 | -2527 | 14815 | AN3143 |
| 774  | CONTIG51 | 1032243 | 1032680 | 1.97 | 4.22E-03 | transcription_start_site | - | 1033533 | 1033533 | 1071  | 14826 | AN3147 |
| 1978 | CONTIG51 | 1032993 | 1034304 | 0.95 | 3.10E-02 | transcription_start_site | - | 1033733 | 1033733 | 84    | 14825 | AN3147 |
| 1978 | CONTIG51 | 1032993 | 1034304 | 0.95 | 3.10E-02 | transcription_start_site | - | 1033533 | 1033533 | -115  | 14826 | AN3147 |
| 1978 | CONTIG51 | 1032993 | 1034304 | 0.95 | 3.10E-02 | transcription_start_site | - | 1033841 | 1033841 | 192   | 14824 | AN3147 |
| 1978 | CONTIG51 | 1032993 | 1034304 | 0.95 | 3.10E-02 | transcription_start_site | - | 1034041 | 1034041 | 392   | 14823 | AN3147 |
| 738  | CONTIG51 | 1030888 | 1031155 | 2.01 | 9.96E-03 | transcription_start_site | + | 1034479 | 1034479 | -3457 | 14827 | AN3148 |
| 738  | CONTIG51 | 1030888 | 1031155 | 2.01 | 9.96E-03 | transcription_start_site | + | 1034610 | 1034610 | -3588 | 14828 | AN3148 |
| 774  | CONTIG51 | 1032243 | 1032680 | 1.97 | 4.22E-03 | transcription_start_site | + | 1034479 | 1034479 | -2017 | 14827 | AN3148 |
| 774  | CONTIG51 | 1032243 | 1032680 | 1.97 | 4.22E-03 | transcription_start_site | + | 1034610 | 1034610 | -2148 | 14828 | AN3148 |
| 774  | CONTIG51 | 1032243 | 1032680 | 1.97 | 4.22E-03 | transcription_start_site | + | 1037127 | 1037127 | -4665 | 14829 | AN3148 |
| 1431 | CONTIG51 | 1031183 | 1031977 | 1.32 | 2.88E-02 | transcription_start_site | + | 1034479 | 1034479 | -2899 | 14827 | AN3148 |
| 1431 | CONTIG51 | 1031183 | 1031977 | 1.32 | 2.88E-02 | transcription_start_site | + | 1034610 | 1034610 | -3030 | 14828 | AN3148 |
| 1978 | CONTIG51 | 1032993 | 1034304 | 0.95 | 3.10E-02 | transcription_start_site | + | 1034479 | 1034479 | -830  | 14827 | AN3148 |
| 1978 | CONTIG51 | 1032993 | 1034304 | 0.95 | 3.10E-02 | transcription_start_site | + | 1034610 | 1034610 | -961  | 14828 | AN3148 |
| 1978 | CONTIG51 | 1032993 | 1034304 | 0.95 | 3.10E-02 | transcription_start_site | + | 1037127 | 1037127 | -3478 | 14829 | AN3148 |
| 2    | CONTIG51 | 1056917 | 1058008 | 3.7  | 0.00E+00 | transcription_start_site | + | 1056197 | 1056197 | 1265  | 14843 | AN3152 |
| 10   | CONTIG51 | 1053987 | 1054626 | 3.53 | 0.00E+00 | transcription_start_site | + | 1054842 | 1054842 | -535  | 14840 | AN3152 |
| 10   | CONTIG51 | 1053987 | 1054626 | 3.53 | 0.00E+00 | transcription_start_site | + | 1054948 | 1054948 | -641  | 14841 | AN3152 |
| 10   | CONTIG51 | 1053987 | 1054626 | 3.53 | 0.00E+00 | transcription_start_site | + | 1055811 | 1055811 | -1504 | 14842 | AN3152 |
| 10   | CONTIG51 | 1053987 | 1054626 | 3.53 | 0.00E+00 | transcription_start_site | + | 1056197 | 1056197 | -1890 | 14843 | AN3152 |
| 1297 | CONTIG51 | 1051815 | 1052904 | 1.44 | 1.71E-02 | transcription_start_site | + | 1054842 | 1054842 | -2482 | 14840 | AN3152 |
| 1297 | CONTIG51 | 1051815 | 1052904 | 1.44 | 1.71E-02 | transcription_start_site | + | 1054948 | 1054948 | -2588 | 14841 | AN3152 |
| 1297 | CONTIG51 | 1051815 | 1052904 | 1.44 | 1.71E-02 | transcription_start_site | + | 1055811 | 1055811 | -3451 | 14842 | AN3152 |
| 1297 | CONTIG51 | 1051815 | 1052904 | 1.44 | 1.71E-02 | transcription_start_site | + | 1056197 | 1056197 | -3837 | 14843 | AN3152 |
| 2    | CONTIG51 | 1056917 | 1058008 | 3.7  | 0.00E+00 | transcription_start_site | + | 1062610 | 1062610 | -5147 | 14844 | AN3153 |
| 2068 | CONTIG51 | 1059244 | 1060928 | 0.9  | 9.43E-02 | transcription_start_site | + | 1062610 | 1062610 | -2524 | 14844 | AN3153 |



|      |          |         |         |      |          |                          |   |         |         |       |       |        |
|------|----------|---------|---------|------|----------|--------------------------|---|---------|---------|-------|-------|--------|
| 2068 | CONTIG51 | 1059244 | 1060928 | 0.9  | 9.43E-02 | transcription_start_site | + | 1063289 | 1063289 | -3203 | 14845 | AN3153 |
| 2068 | CONTIG51 | 1059244 | 1060928 | 0.9  | 9.43E-02 | transcription_start_site | + | 1065775 | 1065775 | -5689 | 14846 | AN3154 |
| 2068 | CONTIG51 | 1059244 | 1060928 | 0.9  | 9.43E-02 | transcription_start_site | + | 1065902 | 1065902 | -5816 | 14847 | AN3154 |
| 1115 | CONTIG51 | 1084221 | 1084562 | 1.6  | 3.34E-02 | transcription_start_site | - | 1080859 | 1080859 | -3532 | 14866 | AN3159 |
| 1115 | CONTIG51 | 1084221 | 1084562 | 1.6  | 3.34E-02 | transcription_start_site | - | 1079955 | 1079955 | -4436 | 14867 | AN3159 |
| 1115 | CONTIG51 | 1084221 | 1084562 | 1.6  | 3.34E-02 | transcription_start_site | - | 1079655 | 1079655 | -4736 | 14868 | AN3159 |
| 1115 | CONTIG51 | 1084221 | 1084562 | 1.6  | 3.34E-02 | transcription_start_site | - | 1083325 | 1083325 | -1066 | 14869 | AN3160 |
| 1115 | CONTIG51 | 1084221 | 1084562 | 1.6  | 3.34E-02 | transcription_start_site | - | 1083030 | 1083030 | -1361 | 14870 | AN3160 |
| 1115 | CONTIG51 | 1084221 | 1084562 | 1.6  | 3.34E-02 | transcription_start_site | - | 1082710 | 1082710 | -1681 | 14871 | AN3160 |
| 1115 | CONTIG51 | 1084221 | 1084562 | 1.6  | 3.34E-02 | transcription_start_site | - | 1082426 | 1082426 | -1965 | 14872 | AN3160 |
| 1115 | CONTIG51 | 1084221 | 1084562 | 1.6  | 3.34E-02 | transcription_start_site | - | 1082302 | 1082302 | -2089 | 14873 | AN3160 |
| 1115 | CONTIG51 | 1084221 | 1084562 | 1.6  | 3.34E-02 | transcription_start_site | + | 1084749 | 1084749 | -357  | 14874 | AN3161 |
| 1115 | CONTIG51 | 1084221 | 1084562 | 1.6  | 3.34E-02 | transcription_start_site | + | 1085413 | 1085413 | -1021 | 14875 | AN3161 |
| 1115 | CONTIG51 | 1084221 | 1084562 | 1.6  | 3.34E-02 | transcription_start_site | + | 1085562 | 1085562 | -1170 | 14876 | AN3161 |
| 1115 | CONTIG51 | 1084221 | 1084562 | 1.6  | 3.34E-02 | transcription_start_site | + | 1087160 | 1087160 | -2768 | 14877 | AN3162 |
| 1115 | CONTIG51 | 1084221 | 1084562 | 1.6  | 3.34E-02 | transcription_start_site | + | 1087636 | 1087636 | -3244 | 14878 | AN3162 |
| 884  | CONTIG51 | 1088853 | 1089213 | 1.85 | 1.54E-02 | transcription_start_site | + | 1089185 | 1089185 | -152  | 14879 | AN3163 |
| 884  | CONTIG51 | 1088853 | 1089213 | 1.85 | 1.54E-02 | transcription_start_site | + | 1089436 | 1089436 | -403  | 14880 | AN3163 |
| 884  | CONTIG51 | 1088853 | 1089213 | 1.85 | 1.54E-02 | transcription_start_site | + | 1089619 | 1089619 | -586  | 14881 | AN3163 |
| 884  | CONTIG51 | 1088853 | 1089213 | 1.85 | 1.54E-02 | transcription_start_site | + | 1090157 | 1090157 | -1124 | 14882 | AN3163 |
| 1115 | CONTIG51 | 1084221 | 1084562 | 1.6  | 3.34E-02 | transcription_start_site | + | 1089185 | 1089185 | -4793 | 14879 | AN3163 |
| 1115 | CONTIG51 | 1084221 | 1084562 | 1.6  | 3.34E-02 | transcription_start_site | + | 1089436 | 1089436 | -5044 | 14880 | AN3163 |
| 884  | CONTIG51 | 1088853 | 1089213 | 1.85 | 1.54E-02 | transcription_start_site | + | 1090824 | 1090824 | -1791 | 14883 | AN3164 |
| 884  | CONTIG51 | 1088853 | 1089213 | 1.85 | 1.54E-02 | transcription_start_site | + | 1092613 | 1092613 | -3580 | 14884 | AN3165 |
| 884  | CONTIG51 | 1088853 | 1089213 | 1.85 | 1.54E-02 | transcription_start_site | + | 1092871 | 1092871 | -3838 | 14885 | AN3165 |
| 1923 | CONTIG51 | 1102581 | 1103613 | 0.99 | 1.05E-01 | transcription_start_site | - | 1098368 | 1098368 | -4729 | 14888 | AN3167 |
| 1923 | CONTIG51 | 1102581 | 1103613 | 0.99 | 1.05E-01 | transcription_start_site | - | 1098145 | 1098145 | -4952 | 14889 | AN3167 |
| 1923 | CONTIG51 | 1102581 | 1103613 | 0.99 | 1.05E-01 | transcription_start_site | - | 1097929 | 1097929 | -5168 | 14890 | AN3167 |
| 1923 | CONTIG51 | 1102581 | 1103613 | 0.99 | 1.05E-01 | transcription_start_site | - | 1102513 | 1102513 | -584  | 14895 | AN3169 |
| 1923 | CONTIG51 | 1102581 | 1103613 | 0.99 | 1.05E-01 | transcription_start_site | - | 1101540 | 1101540 | -1557 | 14896 | AN3169 |
| 1923 | CONTIG51 | 1102581 | 1103613 | 0.99 | 1.05E-01 | transcription_start_site | - | 1101165 | 1101165 | -1932 | 14897 | AN3169 |
| 1923 | CONTIG51 | 1102581 | 1103613 | 0.99 | 1.05E-01 | transcription_start_site | + | 1108167 | 1108167 | -5070 | 14899 | AN3171 |
| 1923 | CONTIG51 | 1102581 | 1103613 | 0.99 | 1.05E-01 | transcription_start_site | + | 1108361 | 1108361 | -5264 | 14900 | AN3171 |
| 8    | CONTIG52 | 15691   | 16940   | 3.55 | 0.00E+00 | transcription_start_site | - | 12302   | 12302   | -4013 | 14915 | AN3178 |
| 8    | CONTIG52 | 15691   | 16940   | 3.55 | 0.00E+00 | transcription_start_site | - | 11800   | 11800   | -4515 | 14916 | AN3178 |
| 8    | CONTIG52 | 15691   | 16940   | 3.55 | 0.00E+00 | transcription_start_site | - | 16056   | 16056   | -259  | 14917 | AN3179 |
| 8    | CONTIG52 | 15691   | 16940   | 3.55 | 0.00E+00 | transcription_start_site | - | 15466   | 15466   | -849  | 14918 | AN3179 |
| 8    | CONTIG52 | 15691   | 16940   | 3.55 | 0.00E+00 | transcription_start_site | - | 13977   | 13977   | -2338 | 14919 | AN3179 |
| 159  | CONTIG52 | 20121   | 20472   | 2.93 | 1.62E-03 | transcription_start_site | - | 16056   | 16056   | -4240 | 14917 | AN3179 |
| 159  | CONTIG52 | 20121   | 20472   | 2.93 | 1.62E-03 | transcription_start_site | - | 15466   | 15466   | -4830 | 14918 | AN3179 |
| 159  | CONTIG52 | 20121   | 20472   | 2.93 | 1.62E-03 | transcription_start_site | - | 19805   | 19805   | -491  | 14920 | AN3180 |
| 159  | CONTIG52 | 20121   | 20472   | 2.93 | 1.62E-03 | transcription_start_site | - | 19603   | 19603   | -693  | 14921 | AN3180 |
| 159  | CONTIG52 | 20121   | 20472   | 2.93 | 1.62E-03 | transcription_start_site | - | 18738   | 18738   | -1558 | 14922 | AN3180 |
| 1141 | CONTIG52 | 49278   | 49716   | 1.58 | 3.61E-02 | transcription_start_site | - | 48493   | 48493   | -1004 | 14938 | AN3188 |
| 1141 | CONTIG52 | 49278   | 49716   | 1.58 | 3.61E-02 | transcription_start_site | - | 48272   | 48272   | -1225 | 14939 | AN3188 |
| 1141 | CONTIG52 | 49278   | 49716   | 1.58 | 3.61E-02 | transcription_start_site | - | 48130   | 48130   | -1367 | 14940 | AN3188 |
| 1141 | CONTIG52 | 49278   | 49716   | 1.58 | 3.61E-02 | transcription_start_site | - | 47861   | 47861   | -1636 | 14941 | AN3188 |
| 1141 | CONTIG52 | 49278   | 49716   | 1.58 | 3.61E-02 | transcription_start_site | - | 47388   | 47388   | -2109 | 14942 | AN3188 |
| 1141 | CONTIG52 | 49278   | 49716   | 1.58 | 3.61E-02 | transcription_start_site | - | 45919   | 45919   | -3578 | 14943 | AN3188 |
| 1141 | CONTIG52 | 49278   | 49716   | 1.58 | 3.61E-02 | transcription_start_site | - | 45104   | 45104   | -4393 | 14944 | AN3188 |
| 512  | CONTIG52 | 65412   | 65686   | 2.3  | 1.06E-02 | transcription_start_site | - | 65282   | 65282   | -267  | 14951 | AN3193 |
| 1199 | CONTIG52 | 73667   | 73941   | 1.53 | 7.66E-02 | transcription_start_site | - | 70687   | 70687   | -3117 | 14955 | AN3195 |
| 1199 | CONTIG52 | 73667   | 73941   | 1.53 | 7.66E-02 | transcription_start_site | - | 70246   | 70246   | -3558 | 14956 | AN3195 |
| 1199 | CONTIG52 | 73667   | 73941   | 1.53 | 7.66E-02 | transcription_start_site | - | 69901   | 69901   | -3903 | 14957 | AN3195 |
| 1199 | CONTIG52 | 73667   | 73941   | 1.53 | 7.66E-02 | transcription_start_site | - | 69511   | 69511   | -4293 | 14958 | AN3195 |
| 1199 | CONTIG52 | 73667   | 73941   | 1.53 | 7.66E-02 | transcription_start_site | - | 69230   | 69230   | -4574 | 14959 | AN3195 |
| 1199 | CONTIG52 | 73667   | 73941   | 1.53 | 7.66E-02 | transcription_start_site | + | 73848   | 73848   | -44   | 14961 | AN3197 |

|      |          |       |       |      |          |                          |   |       |       |       |       |        |
|------|----------|-------|-------|------|----------|--------------------------|---|-------|-------|-------|-------|--------|
| 1199 | CONTIG52 | 73667 | 73941 | 1.53 | 7.66E-02 | transcription_start_site | + | 74649 | 74649 | -845  | 14962 | AN3197 |
| 292  | CONTIG53 | 10955 | 11230 | 2.64 | 2.06E-04 | transcription_start_site | + | 11363 | 11363 | -270  | 14980 | AN3203 |
| 1759 | CONTIG53 | 15380 | 15882 | 1.1  | 1.22E-01 | transcription_start_site | + | 19806 | 19806 | -4175 | 14983 | AN3205 |
| 1759 | CONTIG53 | 15380 | 15882 | 1.1  | 1.22E-01 | transcription_start_site | + | 20771 | 20771 | -5140 | 14984 | AN3205 |
| 525  | CONTIG53 | 41496 | 41826 | 2.28 | 2.61E-03 | transcription_start_site | - | 41087 | 41087 | -574  | 15000 | AN3210 |
| 525  | CONTIG53 | 41496 | 41826 | 2.28 | 2.61E-03 | transcription_start_site | - | 40546 | 40546 | -1115 | 15001 | AN3210 |
| 525  | CONTIG53 | 41496 | 41826 | 2.28 | 2.61E-03 | transcription_start_site | - | 40189 | 40189 | -1472 | 15002 | AN3210 |
| 525  | CONTIG53 | 41496 | 41826 | 2.28 | 2.61E-03 | transcription_start_site | - | 39993 | 39993 | -1668 | 15003 | AN3210 |
| 525  | CONTIG53 | 41496 | 41826 | 2.28 | 2.61E-03 | transcription_start_site | - | 39846 | 39846 | -1815 | 15004 | AN3210 |
| 525  | CONTIG53 | 41496 | 41826 | 2.28 | 2.61E-03 | transcription_start_site | - | 39518 | 39518 | -2143 | 15005 | AN3210 |
| 525  | CONTIG53 | 41496 | 41826 | 2.28 | 2.61E-03 | transcription_start_site | - | 39123 | 39123 | -2538 | 15006 | AN3210 |
| 1575 | CONTIG53 | 44121 | 44535 | 1.22 | 8.63E-02 | transcription_start_site | - | 41087 | 41087 | -3241 | 15000 | AN3210 |
| 1575 | CONTIG53 | 44121 | 44535 | 1.22 | 8.63E-02 | transcription_start_site | - | 40546 | 40546 | -3782 | 15001 | AN3210 |
| 1575 | CONTIG53 | 44121 | 44535 | 1.22 | 8.63E-02 | transcription_start_site | - | 40189 | 40189 | -4139 | 15002 | AN3210 |
| 1575 | CONTIG53 | 44121 | 44535 | 1.22 | 8.63E-02 | transcription_start_site | - | 39993 | 39993 | -4335 | 15003 | AN3210 |
| 1575 | CONTIG53 | 44121 | 44535 | 1.22 | 8.63E-02 | transcription_start_site | - | 39846 | 39846 | -4482 | 15004 | AN3210 |
| 1575 | CONTIG53 | 44121 | 44535 | 1.22 | 8.63E-02 | transcription_start_site | - | 39518 | 39518 | -4810 | 15005 | AN3210 |
| 1575 | CONTIG53 | 44121 | 44535 | 1.22 | 8.63E-02 | transcription_start_site | - | 39123 | 39123 | -5205 | 15006 | AN3210 |
| 1575 | CONTIG53 | 44121 | 44535 | 1.22 | 8.63E-02 | transcription_start_site | - | 45458 | 45458 | 1130  | 15008 | AN3211 |
| 1576 | CONTIG53 | 48601 | 49340 | 1.22 | 8.63E-02 | transcription_start_site | - | 45748 | 45748 | -3222 | 15007 | AN3211 |
| 1576 | CONTIG53 | 48601 | 49340 | 1.22 | 8.63E-02 | transcription_start_site | - | 45458 | 45458 | -3512 | 15008 | AN3211 |
| 1576 | CONTIG53 | 48601 | 49340 | 1.22 | 8.63E-02 | transcription_start_site | - | 47148 | 47148 | -1822 | 15009 | AN3212 |
| 1576 | CONTIG53 | 48601 | 49340 | 1.22 | 8.63E-02 | transcription_start_site | - | 46860 | 46860 | -2110 | 15010 | AN3212 |
| 1576 | CONTIG53 | 48601 | 49340 | 1.22 | 8.63E-02 | transcription_start_site | - | 48869 | 48869 | -101  | 15011 | AN3213 |
| 60   | CONTIG54 | 7876  | 8465  | 3.21 | 0.00E+00 | transcription_start_site | - | 7670  | 7670  | -500  | 15012 | AN3214 |
| 60   | CONTIG54 | 7876  | 8465  | 3.21 | 0.00E+00 | transcription_start_site | - | 7105  | 7105  | -1065 | 15013 | AN3214 |
| 60   | CONTIG54 | 7876  | 8465  | 3.21 | 0.00E+00 | transcription_start_site | - | 6797  | 6797  | -1373 | 15014 | AN3214 |
| 60   | CONTIG54 | 7876  | 8465  | 3.21 | 0.00E+00 | transcription_start_site | - | 6359  | 6359  | -1811 | 15015 | AN3214 |
| 60   | CONTIG54 | 7876  | 8465  | 3.21 | 0.00E+00 | transcription_start_site | - | 5329  | 5329  | -2841 | 15016 | AN3214 |
| 60   | CONTIG54 | 7876  | 8465  | 3.21 | 0.00E+00 | transcription_start_site | - | 5039  | 5039  | -3131 | 15017 | AN3214 |
| 60   | CONTIG54 | 7876  | 8465  | 3.21 | 0.00E+00 | transcription_start_site | - | 4877  | 4877  | -3293 | 15018 | AN3214 |
| 213  | CONTIG54 | 12161 | 12435 | 2.8  | 0.00E+00 | transcription_start_site | - | 7670  | 7670  | -4628 | 15012 | AN3214 |
| 213  | CONTIG54 | 12161 | 12435 | 2.8  | 0.00E+00 | transcription_start_site | - | 9993  | 9993  | -2305 | 15019 | AN3215 |
| 213  | CONTIG54 | 12161 | 12435 | 2.8  | 0.00E+00 | transcription_start_site | - | 9841  | 9841  | -2457 | 15020 | AN3215 |
| 213  | CONTIG54 | 12161 | 12435 | 2.8  | 0.00E+00 | transcription_start_site | - | 9724  | 9724  | -2574 | 15021 | AN3215 |
| 60   | CONTIG54 | 7876  | 8465  | 3.21 | 0.00E+00 | transcription_start_site | + | 11190 | 11190 | -3019 | 15022 | AN3216 |
| 60   | CONTIG54 | 7876  | 8465  | 3.21 | 0.00E+00 | transcription_start_site | + | 12083 | 12083 | -3912 | 15023 | AN3216 |
| 60   | CONTIG54 | 7876  | 8465  | 3.21 | 0.00E+00 | transcription_start_site | + | 12528 | 12528 | -4357 | 15024 | AN3216 |
| 60   | CONTIG54 | 7876  | 8465  | 3.21 | 0.00E+00 | transcription_start_site | + | 12803 | 12803 | -4632 | 15025 | AN3216 |
| 60   | CONTIG54 | 7876  | 8465  | 3.21 | 0.00E+00 | transcription_start_site | + | 13262 | 13262 | -5091 | 15026 | AN3216 |
| 213  | CONTIG54 | 12161 | 12435 | 2.8  | 0.00E+00 | transcription_start_site | + | 12083 | 12083 | 215   | 15023 | AN3216 |
| 213  | CONTIG54 | 12161 | 12435 | 2.8  | 0.00E+00 | transcription_start_site | + | 12528 | 12528 | -230  | 15024 | AN3216 |
| 213  | CONTIG54 | 12161 | 12435 | 2.8  | 0.00E+00 | transcription_start_site | + | 12803 | 12803 | -505  | 15025 | AN3216 |
| 213  | CONTIG54 | 12161 | 12435 | 2.8  | 0.00E+00 | transcription_start_site | + | 13262 | 13262 | -964  | 15026 | AN3216 |
| 213  | CONTIG54 | 12161 | 12435 | 2.8  | 0.00E+00 | transcription_start_site | + | 11190 | 11190 | 1108  | 15022 | AN3216 |
| 213  | CONTIG54 | 12161 | 12435 | 2.8  | 0.00E+00 | transcription_start_site | + | 13971 | 13971 | -1673 | 15027 | AN3216 |
| 213  | CONTIG54 | 12161 | 12435 | 2.8  | 0.00E+00 | transcription_start_site | + | 14144 | 14144 | -1846 | 15028 | AN3216 |
| 213  | CONTIG54 | 12161 | 12435 | 2.8  | 0.00E+00 | transcription_start_site | + | 15427 | 15427 | -3129 | 15029 | AN3217 |
| 213  | CONTIG54 | 12161 | 12435 | 2.8  | 0.00E+00 | transcription_start_site | + | 16342 | 16342 | -4044 | 15030 | AN3217 |
| 213  | CONTIG54 | 12161 | 12435 | 2.8  | 0.00E+00 | transcription_start_site | + | 16558 | 16558 | -4260 | 15031 | AN3217 |
| 213  | CONTIG54 | 12161 | 12435 | 2.8  | 0.00E+00 | transcription_start_site | + | 16904 | 16904 | -4606 | 15032 | AN3217 |
| 213  | CONTIG54 | 12161 | 12435 | 2.8  | 0.00E+00 | transcription_start_site | + | 17166 | 17166 | -4868 | 15033 | AN3217 |
| 534  | CONTIG54 | 27977 | 28482 | 2.27 | 1.62E-03 | transcription_start_site | - | 25029 | 25029 | -3200 | 15039 | AN3220 |
| 534  | CONTIG54 | 27977 | 28482 | 2.27 | 1.62E-03 | transcription_start_site | - | 24486 | 24486 | -3743 | 15040 | AN3220 |
| 534  | CONTIG54 | 27977 | 28482 | 2.27 | 1.62E-03 | transcription_start_site | - | 24287 | 24287 | -3942 | 15041 | AN3220 |
| 534  | CONTIG54 | 27977 | 28482 | 2.27 | 1.62E-03 | transcription_start_site | - | 23895 | 23895 | -4334 | 15042 | AN3220 |
| 1366 | CONTIG54 | 25437 | 25779 | 1.38 | 4.20E-02 | transcription_start_site | - | 25029 | 25029 | -579  | 15039 | AN3220 |

|      |          |        |        |      |          |                          |   |        |        |       |       |        |
|------|----------|--------|--------|------|----------|--------------------------|---|--------|--------|-------|-------|--------|
| 1366 | CONTIG54 | 25437  | 25779  | 1.38 | 4.20E-02 | transcription_start_site | - | 24486  | 24486  | -1122 | 15040 | AN3220 |
| 1366 | CONTIG54 | 25437  | 25779  | 1.38 | 4.20E-02 | transcription_start_site | - | 24287  | 24287  | -1321 | 15041 | AN3220 |
| 1366 | CONTIG54 | 25437  | 25779  | 1.38 | 4.20E-02 | transcription_start_site | - | 23895  | 23895  | -1713 | 15042 | AN3220 |
| 534  | CONTIG54 | 27977  | 28482  | 2.27 | 1.62E-03 | transcription_start_site | - | 27712  | 27712  | -517  | 15043 | AN3221 |
| 534  | CONTIG54 | 27977  | 28482  | 2.27 | 1.62E-03 | transcription_start_site | - | 27415  | 27415  | -814  | 15044 | AN3221 |
| 534  | CONTIG54 | 27977  | 28482  | 2.27 | 1.62E-03 | transcription_start_site | - | 27163  | 27163  | -1066 | 15045 | AN3221 |
| 534  | CONTIG54 | 27977  | 28482  | 2.27 | 1.62E-03 | transcription_start_site | - | 26720  | 26720  | -1509 | 15046 | AN3221 |
| 1366 | CONTIG54 | 25437  | 25779  | 1.38 | 4.20E-02 | transcription_start_site | - | 26720  | 26720  | 1112  | 15046 | AN3221 |
| 534  | CONTIG54 | 27977  | 28482  | 2.27 | 1.62E-03 | transcription_start_site | + | 30738  | 30738  | -2508 | 15047 | AN3222 |
| 534  | CONTIG54 | 27977  | 28482  | 2.27 | 1.62E-03 | transcription_start_site | + | 30826  | 30826  | -2596 | 15048 | AN3222 |
| 534  | CONTIG54 | 27977  | 28482  | 2.27 | 1.62E-03 | transcription_start_site | + | 31045  | 31045  | -2815 | 15049 | AN3222 |
| 534  | CONTIG54 | 27977  | 28482  | 2.27 | 1.62E-03 | transcription_start_site | + | 31247  | 31247  | -3017 | 15050 | AN3222 |
| 534  | CONTIG54 | 27977  | 28482  | 2.27 | 1.62E-03 | transcription_start_site | + | 32346  | 32346  | -4116 | 15051 | AN3222 |
| 1366 | CONTIG54 | 25437  | 25779  | 1.38 | 4.20E-02 | transcription_start_site | + | 30738  | 30738  | -5130 | 15047 | AN3222 |
| 2091 | CONTIG54 | 35627  | 35991  | 0.89 | 1.97E-01 | transcription_start_site | - | 35541  | 35541  | -268  | 15052 | AN3223 |
| 2091 | CONTIG54 | 35627  | 35991  | 0.89 | 1.97E-01 | transcription_start_site | - | 34747  | 34747  | -1062 | 15053 | AN3223 |
| 2091 | CONTIG54 | 35627  | 35991  | 0.89 | 1.97E-01 | transcription_start_site | - | 34236  | 34236  | -1573 | 15054 | AN3223 |
| 2091 | CONTIG54 | 35627  | 35991  | 0.89 | 1.97E-01 | transcription_start_site | + | 36527  | 36527  | -718  | 15055 | AN3224 |
| 2091 | CONTIG54 | 35627  | 35991  | 0.89 | 1.97E-01 | transcription_start_site | + | 36854  | 36854  | -1045 | 15056 | AN3224 |
| 2091 | CONTIG54 | 35627  | 35991  | 0.89 | 1.97E-01 | transcription_start_site | + | 37284  | 37284  | -1475 | 15057 | AN3224 |
| 1895 | CONTIG54 | 90008  | 90357  | 1.01 | 1.38E-01 | transcription_start_site | - | 90028  | 90028  | -154  | 15117 | AN3243 |
| 1895 | CONTIG54 | 90008  | 90357  | 1.01 | 1.38E-01 | transcription_start_site | + | 92179  | 92179  | -1996 | 15118 | AN3244 |
| 1895 | CONTIG54 | 90008  | 90357  | 1.01 | 1.38E-01 | transcription_start_site | + | 92705  | 92705  | -2522 | 15119 | AN3244 |
| 1895 | CONTIG54 | 90008  | 90357  | 1.01 | 1.38E-01 | transcription_start_site | + | 93137  | 93137  | -2954 | 15120 | AN3244 |
| 1895 | CONTIG54 | 90008  | 90357  | 1.01 | 1.38E-01 | transcription_start_site | + | 94276  | 94276  | -4093 | 15121 | AN3245 |
| 1895 | CONTIG54 | 90008  | 90357  | 1.01 | 1.38E-01 | transcription_start_site | + | 94756  | 94756  | -4573 | 15122 | AN3245 |
| 349  | CONTIG54 | 99243  | 99652  | 2.54 | 2.26E-04 | transcription_start_site | - | 96999  | 96999  | -2448 | 15123 | AN3246 |
| 349  | CONTIG54 | 99243  | 99652  | 2.54 | 2.26E-04 | transcription_start_site | - | 96814  | 96814  | -2633 | 15124 | AN3246 |
| 349  | CONTIG54 | 99243  | 99652  | 2.54 | 2.26E-04 | transcription_start_site | + | 100366 | 100366 | -918  | 15125 | AN3247 |
| 349  | CONTIG54 | 99243  | 99652  | 2.54 | 2.26E-04 | transcription_start_site | + | 101243 | 101243 | -1795 | 15126 | AN3247 |
| 349  | CONTIG54 | 99243  | 99652  | 2.54 | 2.26E-04 | transcription_start_site | + | 101592 | 101592 | -2144 | 15127 | AN3247 |
| 349  | CONTIG54 | 99243  | 99652  | 2.54 | 2.26E-04 | transcription_start_site | + | 102334 | 102334 | -2886 | 15128 | AN3247 |
| 803  | CONTIG54 | 107328 | 107617 | 1.94 | 7.08E-03 | transcription_start_site | - | 107192 | 107192 | -280  | 15131 | AN3248 |
| 1621 | CONTIG54 | 110403 | 110769 | 1.19 | 7.66E-02 | transcription_start_site | - | 107192 | 107192 | -3394 | 15131 | AN3248 |
| 803  | CONTIG54 | 107328 | 107617 | 1.94 | 7.08E-03 | transcription_start_site | + | 107552 | 107552 | -79   | 15132 | AN3249 |
| 803  | CONTIG54 | 107328 | 107617 | 1.94 | 7.08E-03 | transcription_start_site | + | 107982 | 107982 | -509  | 15133 | AN3249 |
| 803  | CONTIG54 | 107328 | 107617 | 1.94 | 7.08E-03 | transcription_start_site | + | 108410 | 108410 | -937  | 15134 | AN3249 |
| 803  | CONTIG54 | 107328 | 107617 | 1.94 | 7.08E-03 | transcription_start_site | + | 110421 | 110421 | -2948 | 15135 | AN3250 |
| 803  | CONTIG54 | 107328 | 107617 | 1.94 | 7.08E-03 | transcription_start_site | + | 110668 | 110668 | -3195 | 15136 | AN3250 |
| 803  | CONTIG54 | 107328 | 107617 | 1.94 | 7.08E-03 | transcription_start_site | + | 110754 | 110754 | -3281 | 15137 | AN3250 |
| 803  | CONTIG54 | 107328 | 107617 | 1.94 | 7.08E-03 | transcription_start_site | + | 111168 | 111168 | -3695 | 15138 | AN3250 |
| 1621 | CONTIG54 | 110403 | 110769 | 1.19 | 7.66E-02 | transcription_start_site | + | 110668 | 110668 | -82   | 15136 | AN3250 |
| 1621 | CONTIG54 | 110403 | 110769 | 1.19 | 7.66E-02 | transcription_start_site | + | 110421 | 110421 | 165   | 15135 | AN3250 |
| 1621 | CONTIG54 | 110403 | 110769 | 1.19 | 7.66E-02 | transcription_start_site | + | 110754 | 110754 | -168  | 15137 | AN3250 |
| 1621 | CONTIG54 | 110403 | 110769 | 1.19 | 7.66E-02 | transcription_start_site | + | 111168 | 111168 | -582  | 15138 | AN3250 |
| 2092 | CONTIG54 | 113858 | 114429 | 0.89 | 1.97E-01 | transcription_start_site | - | 113769 | 113769 | -374  | 15139 | AN3251 |
| 2092 | CONTIG54 | 113858 | 114429 | 0.89 | 1.97E-01 | transcription_start_site | - | 113259 | 113259 | -884  | 15140 | AN3251 |
| 2092 | CONTIG54 | 113858 | 114429 | 0.89 | 1.97E-01 | transcription_start_site | - | 115042 | 115042 | 898   | 15146 | AN3252 |
| 2092 | CONTIG54 | 113858 | 114429 | 0.89 | 1.97E-01 | transcription_start_site | - | 115154 | 115154 | 1010  | 15145 | AN3252 |
| 1291 | CONTIG54 | 150471 | 150817 | 1.45 | 3.34E-02 | transcription_start_site | - | 150211 | 150211 | -433  | 15184 | AN3262 |
| 1291 | CONTIG54 | 150471 | 150817 | 1.45 | 3.34E-02 | transcription_start_site | - | 149899 | 149899 | -745  | 15185 | AN3262 |
| 1291 | CONTIG54 | 150471 | 150817 | 1.45 | 3.34E-02 | transcription_start_site | - | 149778 | 149778 | -866  | 15186 | AN3262 |
| 1291 | CONTIG54 | 150471 | 150817 | 1.45 | 3.34E-02 | transcription_start_site | - | 149646 | 149646 | -998  | 15187 | AN3262 |
| 1291 | CONTIG54 | 150471 | 150817 | 1.45 | 3.34E-02 | transcription_start_site | - | 149568 | 149568 | -1076 | 15188 | AN3262 |
| 1291 | CONTIG54 | 150471 | 150817 | 1.45 | 3.34E-02 | transcription_start_site | - | 149287 | 149287 | -1357 | 15189 | AN3262 |
| 1291 | CONTIG54 | 150471 | 150817 | 1.45 | 3.34E-02 | transcription_start_site | - | 149070 | 149070 | -1574 | 15190 | AN3262 |
| 1291 | CONTIG54 | 150471 | 150817 | 1.45 | 3.34E-02 | transcription_start_site | - | 148547 | 148547 | -2097 | 15191 | AN3262 |

|      |          |        |        |      |          |                          |   |        |        |       |       |        |
|------|----------|--------|--------|------|----------|--------------------------|---|--------|--------|-------|-------|--------|
| 1859 | CONTIG54 | 155181 | 155977 | 1.04 | 1.22E-01 | transcription_start_site | - | 150211 | 150211 | -5368 | 15184 | AN3262 |
| 1291 | CONTIG54 | 150471 | 150817 | 1.45 | 3.34E-02 | transcription_start_site | - | 151535 | 151535 | 891   | 15192 | AN3263 |
| 1859 | CONTIG54 | 155181 | 155977 | 1.04 | 1.22E-01 | transcription_start_site | - | 151535 | 151535 | -4044 | 15192 | AN3263 |
| 1859 | CONTIG54 | 155181 | 155977 | 1.04 | 1.22E-01 | transcription_start_site | - | 154794 | 154794 | -785  | 15193 | AN3264 |
| 1859 | CONTIG54 | 155181 | 155977 | 1.04 | 1.22E-01 | transcription_start_site | - | 154517 | 154517 | -1062 | 15194 | AN3264 |
| 1859 | CONTIG54 | 155181 | 155977 | 1.04 | 1.22E-01 | transcription_start_site | - | 154070 | 154070 | -1509 | 15195 | AN3264 |
| 1860 | CONTIG54 | 157211 | 157700 | 1.04 | 1.22E-01 | transcription_start_site | - | 154794 | 154794 | -2661 | 15193 | AN3264 |
| 1860 | CONTIG54 | 157211 | 157700 | 1.04 | 1.22E-01 | transcription_start_site | - | 154517 | 154517 | -2938 | 15194 | AN3264 |
| 1860 | CONTIG54 | 157211 | 157700 | 1.04 | 1.22E-01 | transcription_start_site | - | 154070 | 154070 | -3385 | 15195 | AN3264 |
| 1859 | CONTIG54 | 155181 | 155977 | 1.04 | 1.22E-01 | transcription_start_site | - | 155599 | 155599 | 20    | 15200 | AN3265 |
| 1859 | CONTIG54 | 155181 | 155977 | 1.04 | 1.22E-01 | transcription_start_site | - | 156059 | 156059 | 480   | 15199 | AN3265 |
| 1859 | CONTIG54 | 155181 | 155977 | 1.04 | 1.22E-01 | transcription_start_site | - | 156425 | 156425 | 846   | 15198 | AN3265 |
| 1859 | CONTIG54 | 155181 | 155977 | 1.04 | 1.22E-01 | transcription_start_site | - | 156602 | 156602 | 1023  | 15197 | AN3265 |
| 1859 | CONTIG54 | 155181 | 155977 | 1.04 | 1.22E-01 | transcription_start_site | - | 156719 | 156719 | 1140  | 15196 | AN3265 |
| 1860 | CONTIG54 | 157211 | 157700 | 1.04 | 1.22E-01 | transcription_start_site | - | 156719 | 156719 | -736  | 15196 | AN3265 |
| 1860 | CONTIG54 | 157211 | 157700 | 1.04 | 1.22E-01 | transcription_start_site | - | 156602 | 156602 | -853  | 15197 | AN3265 |
| 1860 | CONTIG54 | 157211 | 157700 | 1.04 | 1.22E-01 | transcription_start_site | - | 156425 | 156425 | -1030 | 15198 | AN3265 |
| 1860 | CONTIG54 | 157211 | 157700 | 1.04 | 1.22E-01 | transcription_start_site | - | 156059 | 156059 | -1396 | 15199 | AN3265 |
| 1860 | CONTIG54 | 157211 | 157700 | 1.04 | 1.22E-01 | transcription_start_site | - | 155599 | 155599 | -1856 | 15200 | AN3265 |
| 1859 | CONTIG54 | 155181 | 155977 | 1.04 | 1.22E-01 | transcription_start_site | + | 160241 | 160241 | -4662 | 15201 | AN3267 |
| 1859 | CONTIG54 | 155181 | 155977 | 1.04 | 1.22E-01 | transcription_start_site | + | 160835 | 160835 | -5256 | 15202 | AN3267 |
| 1860 | CONTIG54 | 157211 | 157700 | 1.04 | 1.22E-01 | transcription_start_site | + | 160241 | 160241 | -2785 | 15201 | AN3267 |
| 1860 | CONTIG54 | 157211 | 157700 | 1.04 | 1.22E-01 | transcription_start_site | + | 160835 | 160835 | -3379 | 15202 | AN3267 |
| 1860 | CONTIG54 | 157211 | 157700 | 1.04 | 1.22E-01 | transcription_start_site | + | 161509 | 161509 | -4053 | 15203 | AN3267 |
| 1860 | CONTIG54 | 157211 | 157700 | 1.04 | 1.22E-01 | transcription_start_site | + | 161571 | 161571 | -4115 | 15204 | AN3267 |
| 535  | CONTIG54 | 171981 | 172335 | 2.27 | 1.62E-03 | transcription_start_site | - | 171959 | 171959 | -199  | 15205 | AN3269 |
| 535  | CONTIG54 | 171981 | 172335 | 2.27 | 1.62E-03 | transcription_start_site | - | 171797 | 171797 | -361  | 15206 | AN3269 |
| 535  | CONTIG54 | 171981 | 172335 | 2.27 | 1.62E-03 | transcription_start_site | - | 170877 | 170877 | -1281 | 15207 | AN3269 |
| 535  | CONTIG54 | 171981 | 172335 | 2.27 | 1.62E-03 | transcription_start_site | - | 170431 | 170431 | -1727 | 15208 | AN3269 |
| 535  | CONTIG54 | 171981 | 172335 | 2.27 | 1.62E-03 | transcription_start_site | + | 172382 | 172382 | -224  | 15209 | AN3270 |
| 535  | CONTIG54 | 171981 | 172335 | 2.27 | 1.62E-03 | transcription_start_site | + | 172789 | 172789 | -631  | 15210 | AN3270 |
| 535  | CONTIG54 | 171981 | 172335 | 2.27 | 1.62E-03 | transcription_start_site | + | 174919 | 174919 | -2761 | 15211 | AN3271 |
| 535  | CONTIG54 | 171981 | 172335 | 2.27 | 1.62E-03 | transcription_start_site | + | 174992 | 174992 | -2834 | 15212 | AN3271 |
| 535  | CONTIG54 | 171981 | 172335 | 2.27 | 1.62E-03 | transcription_start_site | + | 175168 | 175168 | -3010 | 15213 | AN3271 |
| 535  | CONTIG54 | 171981 | 172335 | 2.27 | 1.62E-03 | transcription_start_site | + | 176403 | 176403 | -4245 | 15214 | AN3271 |
| 209  | CONTIG55 | 8046   | 8395   | 2.8  | 0.00E+00 | transcription_start_site | + | 10440  | 10440  | -2219 | 15223 | AN3275 |
| 209  | CONTIG55 | 8046   | 8395   | 2.8  | 0.00E+00 | transcription_start_site | + | 10684  | 10684  | -2463 | 15224 | AN3275 |
| 209  | CONTIG55 | 8046   | 8395   | 2.8  | 0.00E+00 | transcription_start_site | + | 10824  | 10824  | -2603 | 15225 | AN3275 |
| 209  | CONTIG55 | 8046   | 8395   | 2.8  | 0.00E+00 | transcription_start_site | + | 11260  | 11260  | -3039 | 15226 | AN3275 |
| 209  | CONTIG55 | 8046   | 8395   | 2.8  | 0.00E+00 | transcription_start_site | + | 11532  | 11532  | -3311 | 15227 | AN3275 |
| 209  | CONTIG55 | 8046   | 8395   | 2.8  | 0.00E+00 | transcription_start_site | + | 11707  | 11707  | -3486 | 15228 | AN3275 |
| 209  | CONTIG55 | 8046   | 8395   | 2.8  | 0.00E+00 | transcription_start_site | + | 12070  | 12070  | -3849 | 15229 | AN3275 |
| 209  | CONTIG55 | 8046   | 8395   | 2.8  | 0.00E+00 | transcription_start_site | + | 12296  | 12296  | -4075 | 15230 | AN3275 |
| 1586 | CONTIG55 | 19579  | 19928  | 1.21 | 3.34E-02 | transcription_start_site | - | 15761  | 15761  | -3992 | 15234 | AN3277 |
| 1586 | CONTIG55 | 19579  | 19928  | 1.21 | 3.34E-02 | transcription_start_site | - | 15413  | 15413  | -4340 | 15235 | AN3277 |
| 1586 | CONTIG55 | 19579  | 19928  | 1.21 | 3.34E-02 | transcription_start_site | - | 15287  | 15287  | -4466 | 15236 | AN3277 |
| 1586 | CONTIG55 | 19579  | 19928  | 1.21 | 3.34E-02 | transcription_start_site | - | 15008  | 15008  | -4745 | 15237 | AN3277 |
| 1586 | CONTIG55 | 19579  | 19928  | 1.21 | 3.34E-02 | transcription_start_site | - | 19265  | 19265  | -488  | 15240 | AN3279 |
| 1586 | CONTIG55 | 19579  | 19928  | 1.21 | 3.34E-02 | transcription_start_site | - | 18580  | 18580  | -1173 | 15241 | AN3279 |
| 1586 | CONTIG55 | 19579  | 19928  | 1.21 | 3.34E-02 | transcription_start_site | + | 20165  | 20165  | -411  | 15242 | AN3280 |
| 1586 | CONTIG55 | 19579  | 19928  | 1.21 | 3.34E-02 | transcription_start_site | + | 20264  | 20264  | -510  | 15243 | AN3280 |
| 1586 | CONTIG55 | 19579  | 19928  | 1.21 | 3.34E-02 | transcription_start_site | + | 20363  | 20363  | -609  | 15244 | AN3280 |
| 1586 | CONTIG55 | 19579  | 19928  | 1.21 | 3.34E-02 | transcription_start_site | + | 20903  | 20903  | -1149 | 15245 | AN3280 |
| 1586 | CONTIG55 | 19579  | 19928  | 1.21 | 3.34E-02 | transcription_start_site | + | 22054  | 22054  | -2300 | 15246 | AN3281 |
| 1586 | CONTIG55 | 19579  | 19928  | 1.21 | 3.34E-02 | transcription_start_site | + | 22152  | 22152  | -2398 | 15247 | AN3281 |
| 1586 | CONTIG55 | 19579  | 19928  | 1.21 | 3.34E-02 | transcription_start_site | + | 22302  | 22302  | -2548 | 15248 | AN3281 |
| 1586 | CONTIG55 | 19579  | 19928  | 1.21 | 3.34E-02 | transcription_start_site | + | 22462  | 22462  | -2708 | 15249 | AN3281 |

|      |          |        |        |      |          |                          |   |       |       |       |       |        |
|------|----------|--------|--------|------|----------|--------------------------|---|-------|-------|-------|-------|--------|
| 1586 | CONTIG55 | 19579  | 19928  | 1.21 | 3.34E-02 | transcription_start_site | + | 22897 | 22897 | -3143 | 15250 | AN3281 |
| 1586 | CONTIG55 | 19579  | 19928  | 1.21 | 3.34E-02 | transcription_start_site | + | 23054 | 23054 | -3300 | 15251 | AN3281 |
| 1586 | CONTIG55 | 19579  | 19928  | 1.21 | 3.34E-02 | transcription_start_site | + | 23221 | 23221 | -3467 | 15252 | AN3281 |
| 1586 | CONTIG55 | 19579  | 19928  | 1.21 | 3.34E-02 | transcription_start_site | + | 23386 | 23386 | -3632 | 15253 | AN3281 |
| 1586 | CONTIG55 | 19579  | 19928  | 1.21 | 3.34E-02 | transcription_start_site | + | 23711 | 23711 | -3957 | 15254 | AN3281 |
| 1586 | CONTIG55 | 19579  | 19928  | 1.21 | 3.34E-02 | transcription_start_site | + | 23950 | 23950 | -4196 | 15255 | AN3281 |
| 1586 | CONTIG55 | 19579  | 19928  | 1.21 | 3.34E-02 | transcription_start_site | + | 24126 | 24126 | -4372 | 15256 | AN3281 |
| 1441 | CONTIG55 | 40590  | 40877  | 1.31 | 2.29E-02 | transcription_start_site | - | 40085 | 40085 | -648  | 15270 | AN3287 |
| 1441 | CONTIG55 | 40590  | 40877  | 1.31 | 2.29E-02 | transcription_start_site | - | 39492 | 39492 | -1241 | 15271 | AN3287 |
| 1766 | CONTIG55 | 45393  | 45743  | 1.09 | 5.36E-02 | transcription_start_site | - | 42253 | 42253 | -3315 | 15272 | AN3288 |
| 1766 | CONTIG55 | 45393  | 45743  | 1.09 | 5.36E-02 | transcription_start_site | - | 42050 | 42050 | -3518 | 15273 | AN3288 |
| 1123 | CONTIG55 | 60243  | 60657  | 1.59 | 7.70E-03 | transcription_start_site | - | 57789 | 57789 | -2661 | 15286 | AN3292 |
| 1123 | CONTIG55 | 60243  | 60657  | 1.59 | 7.70E-03 | transcription_start_site | - | 57654 | 57654 | -2796 | 15287 | AN3292 |
| 1123 | CONTIG55 | 60243  | 60657  | 1.59 | 7.70E-03 | transcription_start_site | - | 57399 | 57399 | -3051 | 15288 | AN3292 |
| 1123 | CONTIG55 | 60243  | 60657  | 1.59 | 7.70E-03 | transcription_start_site | + | 59257 | 59257 | 1193  | 15289 | AN3293 |
| 1123 | CONTIG55 | 60243  | 60657  | 1.59 | 7.70E-03 | transcription_start_site | + | 60731 | 60731 | -281  | 15290 | AN3294 |
| 1123 | CONTIG55 | 60243  | 60657  | 1.59 | 7.70E-03 | transcription_start_site | + | 61068 | 61068 | -618  | 15291 | AN3294 |
| 1123 | CONTIG55 | 60243  | 60657  | 1.59 | 7.70E-03 | transcription_start_site | + | 61165 | 61165 | -715  | 15292 | AN3294 |
| 1123 | CONTIG55 | 60243  | 60657  | 1.59 | 7.70E-03 | transcription_start_site | + | 61273 | 61273 | -823  | 15293 | AN3294 |
| 1123 | CONTIG55 | 60243  | 60657  | 1.59 | 7.70E-03 | transcription_start_site | + | 61515 | 61515 | -1065 | 15294 | AN3294 |
| 1123 | CONTIG55 | 60243  | 60657  | 1.59 | 7.70E-03 | transcription_start_site | + | 61644 | 61644 | -1194 | 15295 | AN3294 |
| 1123 | CONTIG55 | 60243  | 60657  | 1.59 | 7.70E-03 | transcription_start_site | + | 61793 | 61793 | -1343 | 15296 | AN3294 |
| 1123 | CONTIG55 | 60243  | 60657  | 1.59 | 7.70E-03 | transcription_start_site | + | 63160 | 63160 | -2710 | 15297 | AN3295 |
| 1123 | CONTIG55 | 60243  | 60657  | 1.59 | 7.70E-03 | transcription_start_site | + | 64417 | 64417 | -3967 | 15298 | AN3296 |
| 1123 | CONTIG55 | 60243  | 60657  | 1.59 | 7.70E-03 | transcription_start_site | + | 64731 | 64731 | -4281 | 15299 | AN3296 |
| 1091 | CONTIG55 | 73353  | 73632  | 1.62 | 7.08E-03 | transcription_start_site | - | 69711 | 69711 | -3781 | 15305 | AN3299 |
| 1091 | CONTIG55 | 73353  | 73632  | 1.62 | 7.08E-03 | transcription_start_site | - | 69502 | 69502 | -3990 | 15306 | AN3299 |
| 1091 | CONTIG55 | 73353  | 73632  | 1.62 | 7.08E-03 | transcription_start_site | + | 72752 | 72752 | 740   | 15310 | AN3300 |
| 1091 | CONTIG55 | 73353  | 73632  | 1.62 | 7.08E-03 | transcription_start_site | + | 73787 | 73787 | -294  | 15311 | AN3301 |
| 1091 | CONTIG55 | 73353  | 73632  | 1.62 | 7.08E-03 | transcription_start_site | + | 74014 | 74014 | -521  | 15312 | AN3301 |
| 1091 | CONTIG55 | 73353  | 73632  | 1.62 | 7.08E-03 | transcription_start_site | + | 74882 | 74882 | -1389 | 15313 | AN3301 |
| 1091 | CONTIG55 | 73353  | 73632  | 1.62 | 7.08E-03 | transcription_start_site | + | 75504 | 75504 | -2011 | 15314 | AN3301 |
| 1489 | CONTIG55 | 76370  | 76795  | 1.28 | 2.63E-02 | transcription_start_site | + | 75504 | 75504 | 1078  | 15314 | AN3301 |
| 1091 | CONTIG55 | 73353  | 73632  | 1.62 | 7.08E-03 | transcription_start_site | + | 76746 | 76746 | -3253 | 15315 | AN3302 |
| 1091 | CONTIG55 | 73353  | 73632  | 1.62 | 7.08E-03 | transcription_start_site | + | 77491 | 77491 | -3998 | 15316 | AN3302 |
| 1489 | CONTIG55 | 76370  | 76795  | 1.28 | 2.63E-02 | transcription_start_site | + | 76746 | 76746 | -163  | 15315 | AN3302 |
| 1489 | CONTIG55 | 76370  | 76795  | 1.28 | 2.63E-02 | transcription_start_site | + | 77491 | 77491 | -908  | 15316 | AN3302 |
| 1489 | CONTIG55 | 76370  | 76795  | 1.28 | 2.63E-02 | transcription_start_site | + | 81140 | 81140 | -4557 | 15321 | AN3304 |
| 1489 | CONTIG55 | 76370  | 76795  | 1.28 | 2.63E-02 | transcription_start_site | + | 81641 | 81641 | -5058 | 15322 | AN3304 |
| 2019 | CONTIG55 | 86182  | 86466  | 0.93 | 9.60E-02 | transcription_start_site | - | 86129 | 86129 | -195  | 15325 | AN3305 |
| 2019 | CONTIG55 | 86182  | 86466  | 0.93 | 9.60E-02 | transcription_start_site | - | 85985 | 85985 | -339  | 15326 | AN3305 |
| 2019 | CONTIG55 | 86182  | 86466  | 0.93 | 9.60E-02 | transcription_start_site | - | 85694 | 85694 | -630  | 15327 | AN3305 |
| 2019 | CONTIG55 | 86182  | 86466  | 0.93 | 9.60E-02 | transcription_start_site | - | 85256 | 85256 | -1068 | 15328 | AN3305 |
| 2019 | CONTIG55 | 86182  | 86466  | 0.93 | 9.60E-02 | transcription_start_site | + | 87670 | 87670 | -1346 | 15329 | AN3306 |
| 2019 | CONTIG55 | 86182  | 86466  | 0.93 | 9.60E-02 | transcription_start_site | + | 87983 | 87983 | -1659 | 15330 | AN3306 |
| 2019 | CONTIG55 | 86182  | 86466  | 0.93 | 9.60E-02 | transcription_start_site | + | 88309 | 88309 | -1985 | 15331 | AN3306 |
| 2019 | CONTIG55 | 86182  | 86466  | 0.93 | 9.60E-02 | transcription_start_site | + | 88604 | 88604 | -2280 | 15332 | AN3306 |
| 2019 | CONTIG55 | 86182  | 86466  | 0.93 | 9.60E-02 | transcription_start_site | + | 88720 | 88720 | -2396 | 15333 | AN3306 |
| 2019 | CONTIG55 | 86182  | 86466  | 0.93 | 9.60E-02 | transcription_start_site | + | 89697 | 89697 | -3373 | 15334 | AN3306 |
| 2019 | CONTIG55 | 86182  | 86466  | 0.93 | 9.60E-02 | transcription_start_site | + | 89769 | 89769 | -3445 | 15335 | AN3306 |
| 2019 | CONTIG55 | 86182  | 86466  | 0.93 | 9.60E-02 | transcription_start_site | + | 89970 | 89970 | -3646 | 15336 | AN3306 |
| 2019 | CONTIG55 | 86182  | 86466  | 0.93 | 9.60E-02 | transcription_start_site | + | 90400 | 90400 | -4076 | 15337 | AN3306 |
| 246  | CONTIG55 | 100209 | 100493 | 2.71 | 0.00E+00 | transcription_start_site | - | 99189 | 99189 | -1162 | 15338 | AN3307 |
| 246  | CONTIG55 | 100209 | 100493 | 2.71 | 0.00E+00 | transcription_start_site | - | 98759 | 98759 | -1592 | 15339 | AN3307 |
| 246  | CONTIG55 | 100209 | 100493 | 2.71 | 0.00E+00 | transcription_start_site | - | 98511 | 98511 | -1840 | 15340 | AN3307 |
| 862  | CONTIG55 | 103729 | 104528 | 1.87 | 1.77E-03 | transcription_start_site | - | 99189 | 99189 | -4939 | 15338 | AN3307 |
| 862  | CONTIG55 | 103729 | 104528 | 1.87 | 1.77E-03 | transcription_start_site | - | 98759 | 98759 | -5369 | 15339 | AN3307 |

|      |          |        |        |      |          |                          |   |        |        |       |       |        |
|------|----------|--------|--------|------|----------|--------------------------|---|--------|--------|-------|-------|--------|
| 1162 | CONTIG55 | 101709 | 101978 | 1.56 | 9.32E-03 | transcription_start_site | - | 99189  | 99189  | -2654 | 15338 | AN3307 |
| 1162 | CONTIG55 | 101709 | 101978 | 1.56 | 9.32E-03 | transcription_start_site | - | 98759  | 98759  | -3084 | 15339 | AN3307 |
| 1162 | CONTIG55 | 101709 | 101978 | 1.56 | 9.32E-03 | transcription_start_site | - | 98511  | 98511  | -3332 | 15340 | AN3307 |
| 246  | CONTIG55 | 100209 | 100493 | 2.71 | 0.00E+00 | transcription_start_site | + | 102033 | 102033 | -1682 | 15342 | AN3308 |
| 246  | CONTIG55 | 100209 | 100493 | 2.71 | 0.00E+00 | transcription_start_site | + | 103153 | 103153 | -2802 | 15343 | AN3308 |
| 862  | CONTIG55 | 103729 | 104528 | 1.87 | 1.77E-03 | transcription_start_site | + | 103153 | 103153 | 975   | 15343 | AN3308 |
| 1162 | CONTIG55 | 101709 | 101978 | 1.56 | 9.32E-03 | transcription_start_site | + | 102033 | 102033 | -189  | 15342 | AN3308 |
| 1162 | CONTIG55 | 101709 | 101978 | 1.56 | 9.32E-03 | transcription_start_site | + | 103153 | 103153 | -1309 | 15343 | AN3308 |
| 246  | CONTIG55 | 100209 | 100493 | 2.71 | 0.00E+00 | transcription_start_site | + | 104572 | 104572 | -4221 | 15344 | AN3309 |
| 246  | CONTIG55 | 100209 | 100493 | 2.71 | 0.00E+00 | transcription_start_site | + | 104690 | 104690 | -4339 | 15345 | AN3309 |
| 246  | CONTIG55 | 100209 | 100493 | 2.71 | 0.00E+00 | transcription_start_site | + | 105157 | 105157 | -4806 | 15346 | AN3309 |
| 862  | CONTIG55 | 103729 | 104528 | 1.87 | 1.77E-03 | transcription_start_site | + | 104572 | 104572 | -443  | 15344 | AN3309 |
| 862  | CONTIG55 | 103729 | 104528 | 1.87 | 1.77E-03 | transcription_start_site | + | 104690 | 104690 | -561  | 15345 | AN3309 |
| 862  | CONTIG55 | 103729 | 104528 | 1.87 | 1.77E-03 | transcription_start_site | + | 105157 | 105157 | -1028 | 15346 | AN3309 |
| 862  | CONTIG55 | 103729 | 104528 | 1.87 | 1.77E-03 | transcription_start_site | + | 105895 | 105895 | -1766 | 15347 | AN3309 |
| 862  | CONTIG55 | 103729 | 104528 | 1.87 | 1.77E-03 | transcription_start_site | + | 105974 | 105974 | -1845 | 15348 | AN3309 |
| 862  | CONTIG55 | 103729 | 104528 | 1.87 | 1.77E-03 | transcription_start_site | + | 106254 | 106254 | -2125 | 15349 | AN3309 |
| 862  | CONTIG55 | 103729 | 104528 | 1.87 | 1.77E-03 | transcription_start_site | + | 106698 | 106698 | -2569 | 15350 | AN3309 |
| 1162 | CONTIG55 | 101709 | 101978 | 1.56 | 9.32E-03 | transcription_start_site | + | 104572 | 104572 | -2728 | 15344 | AN3309 |
| 1162 | CONTIG55 | 101709 | 101978 | 1.56 | 9.32E-03 | transcription_start_site | + | 104690 | 104690 | -2846 | 15345 | AN3309 |
| 1162 | CONTIG55 | 101709 | 101978 | 1.56 | 9.32E-03 | transcription_start_site | + | 105157 | 105157 | -3313 | 15346 | AN3309 |
| 1162 | CONTIG55 | 101709 | 101978 | 1.56 | 9.32E-03 | transcription_start_site | + | 105895 | 105895 | -4051 | 15347 | AN3309 |
| 1162 | CONTIG55 | 101709 | 101978 | 1.56 | 9.32E-03 | transcription_start_site | + | 105974 | 105974 | -4130 | 15348 | AN3309 |
| 1162 | CONTIG55 | 101709 | 101978 | 1.56 | 9.32E-03 | transcription_start_site | + | 106254 | 106254 | -4410 | 15349 | AN3309 |
| 1162 | CONTIG55 | 101709 | 101978 | 1.56 | 9.32E-03 | transcription_start_site | + | 106698 | 106698 | -4854 | 15350 | AN3309 |
| 1767 | CONTIG55 | 106504 | 107084 | 1.09 | 5.36E-02 | transcription_start_site | + | 106698 | 106698 | 96    | 15350 | AN3309 |
| 1767 | CONTIG55 | 106504 | 107084 | 1.09 | 5.36E-02 | transcription_start_site | + | 106254 | 106254 | 540   | 15349 | AN3309 |
| 1767 | CONTIG55 | 106504 | 107084 | 1.09 | 5.36E-02 | transcription_start_site | + | 105974 | 105974 | 820   | 15348 | AN3309 |
| 1767 | CONTIG55 | 106504 | 107084 | 1.09 | 5.36E-02 | transcription_start_site | + | 105895 | 105895 | 899   | 15347 | AN3309 |
| 1276 | CONTIG55 | 108828 | 109102 | 1.46 | 1.25E-02 | transcription_start_site | - | 108326 | 108326 | -639  | 15351 | AN3310 |
| 1276 | CONTIG55 | 108828 | 109102 | 1.46 | 1.25E-02 | transcription_start_site | - | 108218 | 108218 | -747  | 15352 | AN3310 |
| 1276 | CONTIG55 | 108828 | 109102 | 1.46 | 1.25E-02 | transcription_start_site | - | 108075 | 108075 | -890  | 15353 | AN3310 |
| 1276 | CONTIG55 | 108828 | 109102 | 1.46 | 1.25E-02 | transcription_start_site | - | 107883 | 107883 | -1082 | 15354 | AN3310 |
| 1767 | CONTIG55 | 106504 | 107084 | 1.09 | 5.36E-02 | transcription_start_site | - | 107883 | 107883 | 1089  | 15354 | AN3310 |
| 1767 | CONTIG55 | 106504 | 107084 | 1.09 | 5.36E-02 | transcription_start_site | - | 108075 | 108075 | 1281  | 15353 | AN3310 |
| 1276 | CONTIG55 | 108828 | 109102 | 1.46 | 1.25E-02 | transcription_start_site | + | 111748 | 111748 | -2783 | 15355 | AN3311 |
| 1276 | CONTIG55 | 108828 | 109102 | 1.46 | 1.25E-02 | transcription_start_site | + | 111897 | 111897 | -2932 | 15356 | AN3311 |
| 1276 | CONTIG55 | 108828 | 109102 | 1.46 | 1.25E-02 | transcription_start_site | + | 112465 | 112465 | -3500 | 15357 | AN3311 |
| 1767 | CONTIG55 | 106504 | 107084 | 1.09 | 5.36E-02 | transcription_start_site | + | 111748 | 111748 | -4954 | 15355 | AN3311 |
| 1767 | CONTIG55 | 106504 | 107084 | 1.09 | 5.36E-02 | transcription_start_site | + | 111897 | 111897 | -5103 | 15356 | AN3311 |
| 2292 | CONTIG55 | 137327 | 137850 | 0.68 | 1.81E-01 | transcription_start_site | - | 134744 | 134744 | -2844 | 15382 | AN3318 |
| 2292 | CONTIG55 | 137327 | 137850 | 0.68 | 1.81E-01 | transcription_start_site | - | 134518 | 134518 | -3070 | 15383 | AN3318 |
| 2292 | CONTIG55 | 137327 | 137850 | 0.68 | 1.81E-01 | transcription_start_site | - | 134415 | 134415 | -3173 | 15384 | AN3318 |
| 2292 | CONTIG55 | 137327 | 137850 | 0.68 | 1.81E-01 | transcription_start_site | - | 134282 | 134282 | -3306 | 15385 | AN3318 |
| 2292 | CONTIG55 | 137327 | 137850 | 0.68 | 1.81E-01 | transcription_start_site | - | 133203 | 133203 | -4385 | 15386 | AN3318 |
| 2292 | CONTIG55 | 137327 | 137850 | 0.68 | 1.81E-01 | transcription_start_site | - | 132928 | 132928 | -4660 | 15387 | AN3318 |
| 2292 | CONTIG55 | 137327 | 137850 | 0.68 | 1.81E-01 | transcription_start_site | - | 132410 | 132410 | -5178 | 15388 | AN3318 |
| 2292 | CONTIG55 | 137327 | 137850 | 0.68 | 1.81E-01 | transcription_start_site | + | 137154 | 137154 | 434   | 15396 | AN3319 |
| 2292 | CONTIG55 | 137327 | 137850 | 0.68 | 1.81E-01 | transcription_start_site | + | 136921 | 136921 | 667   | 15395 | AN3319 |
| 2292 | CONTIG55 | 137327 | 137850 | 0.68 | 1.81E-01 | transcription_start_site | + | 136742 | 136742 | 846   | 15394 | AN3319 |
| 554  | CONTIG55 | 180906 | 181175 | 2.24 | 0.00E+00 | transcription_start_site | + | 183328 | 183328 | -2287 | 15421 | AN3329 |
| 2020 | CONTIG55 | 179271 | 179675 | 0.93 | 9.60E-02 | transcription_start_site | + | 183328 | 183328 | -3855 | 15421 | AN3329 |
| 2183 | CONTIG55 | 181511 | 182090 | 0.81 | 1.54E-01 | transcription_start_site | + | 183328 | 183328 | -1527 | 15421 | AN3329 |
| 2183 | CONTIG55 | 181511 | 182090 | 0.81 | 1.54E-01 | transcription_start_site | + | 186266 | 186266 | -4465 | 15422 | AN3329 |
| 1242 | CONTIG55 | 204690 | 205051 | 1.49 | 1.06E-02 | transcription_start_site | - | 204625 | 204625 | -245  | 15432 | AN3334 |
| 1242 | CONTIG55 | 204690 | 205051 | 1.49 | 1.06E-02 | transcription_start_site | - | 204074 | 204074 | -796  | 15433 | AN3334 |
| 1242 | CONTIG55 | 204690 | 205051 | 1.49 | 1.06E-02 | transcription_start_site | - | 203728 | 203728 | -1142 | 15434 | AN3334 |



|      |          |        |        |      |          |                          |   |        |        |       |       |        |
|------|----------|--------|--------|------|----------|--------------------------|---|--------|--------|-------|-------|--------|
| 1242 | CONTIG55 | 204690 | 205051 | 1.49 | 1.06E-02 | transcription_start_site | + | 208427 | 208427 | -3556 | 15435 | AN3335 |
| 1242 | CONTIG55 | 204690 | 205051 | 1.49 | 1.06E-02 | transcription_start_site | + | 208880 | 208880 | -4009 | 15436 | AN3335 |
| 1409 | CONTIG55 | 236788 | 237054 | 1.34 | 2.05E-02 | transcription_start_site | - | 236412 | 236412 | -509  | 15453 | AN3342 |
| 1409 | CONTIG55 | 236788 | 237054 | 1.34 | 2.05E-02 | transcription_start_site | - | 236103 | 236103 | -818  | 15454 | AN3342 |
| 1409 | CONTIG55 | 236788 | 237054 | 1.34 | 2.05E-02 | transcription_start_site | - | 233605 | 233605 | -3316 | 15455 | AN3342 |
| 1409 | CONTIG55 | 236788 | 237054 | 1.34 | 2.05E-02 | transcription_start_site | - | 233290 | 233290 | -3631 | 15456 | AN3342 |
| 1409 | CONTIG55 | 236788 | 237054 | 1.34 | 2.05E-02 | transcription_start_site | - | 237995 | 237995 | 1074  | 15463 | AN3343 |
| 1306 | CONTIG55 | 264692 | 265027 | 1.43 | 1.37E-02 | transcription_start_site | - | 262712 | 262712 | -2147 | 15490 | AN3349 |
| 1306 | CONTIG55 | 264692 | 265027 | 1.43 | 1.37E-02 | transcription_start_site | - | 262448 | 262448 | -2411 | 15491 | AN3349 |
| 1306 | CONTIG55 | 264692 | 265027 | 1.43 | 1.37E-02 | transcription_start_site | - | 262376 | 262376 | -2483 | 15492 | AN3349 |
| 1306 | CONTIG55 | 264692 | 265027 | 1.43 | 1.37E-02 | transcription_start_site | - | 262171 | 262171 | -2688 | 15493 | AN3349 |
| 1306 | CONTIG55 | 264692 | 265027 | 1.43 | 1.37E-02 | transcription_start_site | - | 261715 | 261715 | -3144 | 15494 | AN3349 |
| 1306 | CONTIG55 | 264692 | 265027 | 1.43 | 1.37E-02 | transcription_start_site | - | 261053 | 261053 | -3806 | 15495 | AN3349 |
| 1306 | CONTIG55 | 264692 | 265027 | 1.43 | 1.37E-02 | transcription_start_site | - | 260786 | 260786 | -4073 | 15496 | AN3349 |
| 1306 | CONTIG55 | 264692 | 265027 | 1.43 | 1.37E-02 | transcription_start_site | - | 260722 | 260722 | -4137 | 15497 | AN3349 |
| 1306 | CONTIG55 | 264692 | 265027 | 1.43 | 1.37E-02 | transcription_start_site | - | 260482 | 260482 | -4377 | 15498 | AN3349 |
| 1306 | CONTIG55 | 264692 | 265027 | 1.43 | 1.37E-02 | transcription_start_site | - | 260336 | 260336 | -4523 | 15499 | AN3349 |
| 1306 | CONTIG55 | 264692 | 265027 | 1.43 | 1.37E-02 | transcription_start_site | - | 260203 | 260203 | -4656 | 15500 | AN3349 |
| 1306 | CONTIG55 | 264692 | 265027 | 1.43 | 1.37E-02 | transcription_start_site | - | 260082 | 260082 | -4777 | 15501 | AN3349 |
| 1306 | CONTIG55 | 264692 | 265027 | 1.43 | 1.37E-02 | transcription_start_site | - | 259837 | 259837 | -5022 | 15502 | AN3349 |
| 1306 | CONTIG55 | 264692 | 265027 | 1.43 | 1.37E-02 | transcription_start_site | - | 259700 | 259700 | -5159 | 15503 | AN3349 |
| 388  | CONTIG55 | 291905 | 292404 | 2.46 | 0.00E+00 | transcription_start_site | - | 291005 | 291005 | -1149 | 15543 | AN3357 |
| 388  | CONTIG55 | 291905 | 292404 | 2.46 | 0.00E+00 | transcription_start_site | - | 289579 | 289579 | -2575 | 15544 | AN3357 |
| 388  | CONTIG55 | 291905 | 292404 | 2.46 | 0.00E+00 | transcription_start_site | + | 293530 | 293530 | -1375 | 15545 | AN3358 |
| 388  | CONTIG55 | 291905 | 292404 | 2.46 | 0.00E+00 | transcription_start_site | + | 294365 | 294365 | -2210 | 15546 | AN3358 |
| 388  | CONTIG55 | 291905 | 292404 | 2.46 | 0.00E+00 | transcription_start_site | + | 294565 | 294565 | -2410 | 15547 | AN3358 |
| 210  | CONTIG55 | 306020 | 306516 | 2.8  | 0.00E+00 | transcription_start_site | - | 301939 | 301939 | -4329 | 15549 | AN3360 |
| 210  | CONTIG55 | 306020 | 306516 | 2.8  | 0.00E+00 | transcription_start_site | - | 306023 | 306023 | -245  | 15552 | AN3361 |
| 210  | CONTIG55 | 306020 | 306516 | 2.8  | 0.00E+00 | transcription_start_site | - | 305686 | 305686 | -582  | 15553 | AN3361 |
| 210  | CONTIG55 | 306020 | 306516 | 2.8  | 0.00E+00 | transcription_start_site | - | 305573 | 305573 | -695  | 15554 | AN3361 |
| 210  | CONTIG55 | 306020 | 306516 | 2.8  | 0.00E+00 | transcription_start_site | - | 305037 | 305037 | -1231 | 15555 | AN3361 |
| 210  | CONTIG55 | 306020 | 306516 | 2.8  | 0.00E+00 | transcription_start_site | - | 304840 | 304840 | -1428 | 15556 | AN3361 |
| 371  | CONTIG55 | 328053 | 328487 | 2.49 | 0.00E+00 | transcription_start_site | - | 324278 | 324278 | -3992 | 15565 | AN3367 |
| 371  | CONTIG55 | 328053 | 328487 | 2.49 | 0.00E+00 | transcription_start_site | - | 323939 | 323939 | -4331 | 15566 | AN3367 |
| 371  | CONTIG55 | 328053 | 328487 | 2.49 | 0.00E+00 | transcription_start_site | - | 327238 | 327238 | -1032 | 15567 | AN3368 |
| 371  | CONTIG55 | 328053 | 328487 | 2.49 | 0.00E+00 | transcription_start_site | - | 327046 | 327046 | -1224 | 15568 | AN3368 |
| 371  | CONTIG55 | 328053 | 328487 | 2.49 | 0.00E+00 | transcription_start_site | - | 326041 | 326041 | -2229 | 15569 | AN3368 |
| 371  | CONTIG55 | 328053 | 328487 | 2.49 | 0.00E+00 | transcription_start_site | - | 325558 | 325558 | -2712 | 15570 | AN3368 |
| 371  | CONTIG55 | 328053 | 328487 | 2.49 | 0.00E+00 | transcription_start_site | - | 325251 | 325251 | -3019 | 15571 | AN3368 |
| 371  | CONTIG55 | 328053 | 328487 | 2.49 | 0.00E+00 | transcription_start_site | + | 330682 | 330682 | -2412 | 15572 | AN3369 |
| 371  | CONTIG55 | 328053 | 328487 | 2.49 | 0.00E+00 | transcription_start_site | + | 330967 | 330967 | -2697 | 15573 | AN3369 |
| 371  | CONTIG55 | 328053 | 328487 | 2.49 | 0.00E+00 | transcription_start_site | + | 332115 | 332115 | -3845 | 15574 | AN3369 |
| 2215 | CONTIG55 | 348153 | 348577 | 0.78 | 1.76E-01 | transcription_start_site | - | 348155 | 348155 | -210  | 15584 | AN3375 |
| 2215 | CONTIG55 | 348153 | 348577 | 0.78 | 1.76E-01 | transcription_start_site | - | 347995 | 347995 | -370  | 15585 | AN3375 |
| 2215 | CONTIG55 | 348153 | 348577 | 0.78 | 1.76E-01 | transcription_start_site | - | 347896 | 347896 | -469  | 15586 | AN3375 |
| 2215 | CONTIG55 | 348153 | 348577 | 0.78 | 1.76E-01 | transcription_start_site | - | 347750 | 347750 | -615  | 15587 | AN3375 |
| 2215 | CONTIG55 | 348153 | 348577 | 0.78 | 1.76E-01 | transcription_start_site | - | 346694 | 346694 | -1671 | 15588 | AN3375 |
| 2215 | CONTIG55 | 348153 | 348577 | 0.78 | 1.76E-01 | transcription_start_site | + | 353333 | 353333 | -4968 | 15589 | AN3377 |
| 358  | CONTIG55 | 393234 | 393751 | 2.52 | 0.00E+00 | transcription_start_site | - | 393119 | 393119 | -373  | 15615 | AN3387 |
| 358  | CONTIG55 | 393234 | 393751 | 2.52 | 0.00E+00 | transcription_start_site | - | 392440 | 392440 | -1052 | 15616 | AN3387 |
| 1307 | CONTIG55 | 395034 | 395313 | 1.43 | 1.37E-02 | transcription_start_site | - | 393119 | 393119 | -2054 | 15615 | AN3387 |
| 1307 | CONTIG55 | 395034 | 395313 | 1.43 | 1.37E-02 | transcription_start_site | - | 392440 | 392440 | -2733 | 15616 | AN3387 |
| 2021 | CONTIG55 | 394284 | 394869 | 0.93 | 9.60E-02 | transcription_start_site | - | 393119 | 393119 | -1457 | 15615 | AN3387 |
| 2021 | CONTIG55 | 394284 | 394869 | 0.93 | 9.60E-02 | transcription_start_site | - | 392440 | 392440 | -2136 | 15616 | AN3387 |
| 358  | CONTIG55 | 393234 | 393751 | 2.52 | 0.00E+00 | transcription_start_site | + | 398500 | 398500 | -5007 | 15617 | AN3388 |
| 1307 | CONTIG55 | 395034 | 395313 | 1.43 | 1.37E-02 | transcription_start_site | + | 398500 | 398500 | -3326 | 15617 | AN3388 |
| 1307 | CONTIG55 | 395034 | 395313 | 1.43 | 1.37E-02 | transcription_start_site | + | 398823 | 398823 | -3649 | 15618 | AN3388 |

|      |          |        |        |      |          |                          |   |        |        |       |       |        |
|------|----------|--------|--------|------|----------|--------------------------|---|--------|--------|-------|-------|--------|
| 1307 | CONTIG55 | 395034 | 395313 | 1.43 | 1.37E-02 | transcription_start_site | + | 398996 | 398996 | -3822 | 15619 | AN3388 |
| 2021 | CONTIG55 | 394284 | 394869 | 0.93 | 9.60E-02 | transcription_start_site | + | 398500 | 398500 | -3923 | 15617 | AN3388 |
| 2021 | CONTIG55 | 394284 | 394869 | 0.93 | 9.60E-02 | transcription_start_site | + | 398823 | 398823 | -4246 | 15618 | AN3388 |
| 2021 | CONTIG55 | 394284 | 394869 | 0.93 | 9.60E-02 | transcription_start_site | + | 398996 | 398996 | -4419 | 15619 | AN3388 |
| 1163 | CONTIG55 | 423838 | 424262 | 1.56 | 9.32E-03 | transcription_start_site | - | 422169 | 422169 | -1881 | 15638 | AN3394 |
| 1163 | CONTIG55 | 423838 | 424262 | 1.56 | 9.32E-03 | transcription_start_site | - | 421537 | 421537 | -2513 | 15639 | AN3394 |
| 1163 | CONTIG55 | 423838 | 424262 | 1.56 | 9.32E-03 | transcription_start_site | + | 423636 | 423636 | 414   | 15643 | AN3395 |
| 1163 | CONTIG55 | 423838 | 424262 | 1.56 | 9.32E-03 | transcription_start_site | + | 423493 | 423493 | 557   | 15642 | AN3395 |
| 1163 | CONTIG55 | 423838 | 424262 | 1.56 | 9.32E-03 | transcription_start_site | + | 423038 | 423038 | 1012  | 15641 | AN3395 |
| 1163 | CONTIG55 | 423838 | 424262 | 1.56 | 9.32E-03 | transcription_start_site | + | 425016 | 425016 | -966  | 15644 | AN3396 |
| 1163 | CONTIG55 | 423838 | 424262 | 1.56 | 9.32E-03 | transcription_start_site | + | 425793 | 425793 | -1743 | 15645 | AN3396 |
| 1163 | CONTIG55 | 423838 | 424262 | 1.56 | 9.32E-03 | transcription_start_site | + | 427065 | 427065 | -3015 | 15646 | AN3396 |
| 785  | CONTIG55 | 459980 | 460269 | 1.96 | 1.09E-03 | transcription_start_site | - | 459826 | 459826 | -298  | 15684 | AN3408 |
| 785  | CONTIG55 | 459980 | 460269 | 1.96 | 1.09E-03 | transcription_start_site | - | 459554 | 459554 | -570  | 15685 | AN3408 |
| 785  | CONTIG55 | 459980 | 460269 | 1.96 | 1.09E-03 | transcription_start_site | - | 459157 | 459157 | -967  | 15686 | AN3408 |
| 785  | CONTIG55 | 459980 | 460269 | 1.96 | 1.09E-03 | transcription_start_site | - | 458888 | 458888 | -1236 | 15687 | AN3408 |
| 1583 | CONTIG55 | 461116 | 461750 | 1.21 | 1.61E-02 | transcription_start_site | - | 459826 | 459826 | -1607 | 15684 | AN3408 |
| 1583 | CONTIG55 | 461116 | 461750 | 1.21 | 1.61E-02 | transcription_start_site | - | 459554 | 459554 | -1879 | 15685 | AN3408 |
| 1583 | CONTIG55 | 461116 | 461750 | 1.21 | 1.61E-02 | transcription_start_site | - | 459157 | 459157 | -2276 | 15686 | AN3408 |
| 1583 | CONTIG55 | 461116 | 461750 | 1.21 | 1.61E-02 | transcription_start_site | - | 458888 | 458888 | -2545 | 15687 | AN3408 |
| 785  | CONTIG55 | 459980 | 460269 | 1.96 | 1.09E-03 | transcription_start_site | + | 462473 | 462473 | -2348 | 15688 | AN3409 |
| 785  | CONTIG55 | 459980 | 460269 | 1.96 | 1.09E-03 | transcription_start_site | + | 462541 | 462541 | -2416 | 15689 | AN3409 |
| 785  | CONTIG55 | 459980 | 460269 | 1.96 | 1.09E-03 | transcription_start_site | + | 462732 | 462732 | -2607 | 15690 | AN3409 |
| 785  | CONTIG55 | 459980 | 460269 | 1.96 | 1.09E-03 | transcription_start_site | + | 463422 | 463422 | -3297 | 15691 | AN3409 |
| 1583 | CONTIG55 | 461116 | 461750 | 1.21 | 1.61E-02 | transcription_start_site | + | 462473 | 462473 | -1040 | 15688 | AN3409 |
| 1583 | CONTIG55 | 461116 | 461750 | 1.21 | 1.61E-02 | transcription_start_site | + | 462541 | 462541 | -1108 | 15689 | AN3409 |
| 1583 | CONTIG55 | 461116 | 461750 | 1.21 | 1.61E-02 | transcription_start_site | + | 462732 | 462732 | -1299 | 15690 | AN3409 |
| 1583 | CONTIG55 | 461116 | 461750 | 1.21 | 1.61E-02 | transcription_start_site | + | 463422 | 463422 | -1989 | 15691 | AN3409 |
| 1863 | CONTIG55 | 469355 | 469789 | 1.03 | 6.74E-02 | transcription_start_site | - | 465990 | 465990 | -3582 | 15692 | AN3410 |
| 1863 | CONTIG55 | 469355 | 469789 | 1.03 | 6.74E-02 | transcription_start_site | - | 465757 | 465757 | -3815 | 15693 | AN3410 |
| 1863 | CONTIG55 | 469355 | 469789 | 1.03 | 6.74E-02 | transcription_start_site | - | 465635 | 465635 | -3937 | 15694 | AN3410 |
| 1863 | CONTIG55 | 469355 | 469789 | 1.03 | 6.74E-02 | transcription_start_site | - | 465291 | 465291 | -4281 | 15695 | AN3410 |
| 1863 | CONTIG55 | 469355 | 469789 | 1.03 | 6.74E-02 | transcription_start_site | - | 467718 | 467718 | -1854 | 15697 | AN3411 |
| 1863 | CONTIG55 | 469355 | 469789 | 1.03 | 6.74E-02 | transcription_start_site | - | 467465 | 467465 | -2107 | 15698 | AN3411 |
| 1863 | CONTIG55 | 469355 | 469789 | 1.03 | 6.74E-02 | transcription_start_site | - | 467333 | 467333 | -2239 | 15699 | AN3411 |
| 1863 | CONTIG55 | 469355 | 469789 | 1.03 | 6.74E-02 | transcription_start_site | - | 469266 | 469266 | -306  | 15700 | AN3412 |
| 1863 | CONTIG55 | 469355 | 469789 | 1.03 | 6.74E-02 | transcription_start_site | - | 469193 | 469193 | -379  | 15701 | AN3412 |
| 1863 | CONTIG55 | 469355 | 469789 | 1.03 | 6.74E-02 | transcription_start_site | - | 469064 | 469064 | -508  | 15702 | AN3412 |
| 1863 | CONTIG55 | 469355 | 469789 | 1.03 | 6.74E-02 | transcription_start_site | - | 468867 | 468867 | -705  | 15703 | AN3412 |
| 1863 | CONTIG55 | 469355 | 469789 | 1.03 | 6.74E-02 | transcription_start_site | + | 469790 | 469790 | -218  | 15704 | AN3413 |
| 1863 | CONTIG55 | 469355 | 469789 | 1.03 | 6.74E-02 | transcription_start_site | + | 469987 | 469987 | -415  | 15705 | AN3413 |
| 1863 | CONTIG55 | 469355 | 469789 | 1.03 | 6.74E-02 | transcription_start_site | + | 470256 | 470256 | -684  | 15706 | AN3413 |
| 1863 | CONTIG55 | 469355 | 469789 | 1.03 | 6.74E-02 | transcription_start_site | + | 470563 | 470563 | -991  | 15707 | AN3413 |
| 1863 | CONTIG55 | 469355 | 469789 | 1.03 | 6.74E-02 | transcription_start_site | + | 472116 | 472116 | -2544 | 15708 | AN3414 |
| 1863 | CONTIG55 | 469355 | 469789 | 1.03 | 6.74E-02 | transcription_start_site | + | 472456 | 472456 | -2884 | 15709 | AN3414 |
| 1863 | CONTIG55 | 469355 | 469789 | 1.03 | 6.74E-02 | transcription_start_site | + | 472672 | 472672 | -3100 | 15710 | AN3414 |
| 1863 | CONTIG55 | 469355 | 469789 | 1.03 | 6.74E-02 | transcription_start_site | + | 473110 | 473110 | -3538 | 15711 | AN3414 |
| 34   | CONTIG56 | 35926  | 36275  | 3.32 | 1.77E-03 | transcription_start_site | - | 31408  | 31408  | -4692 | 15742 | AN3431 |
| 34   | CONTIG56 | 35926  | 36275  | 3.32 | 1.77E-03 | transcription_start_site | - | 31179  | 31179  | -4921 | 15743 | AN3431 |
| 34   | CONTIG56 | 35926  | 36275  | 3.32 | 1.77E-03 | transcription_start_site | - | 31068  | 31068  | -5032 | 15744 | AN3431 |
| 34   | CONTIG56 | 35926  | 36275  | 3.32 | 1.77E-03 | transcription_start_site | - | 34687  | 34687  | -1413 | 15745 | AN3432 |
| 34   | CONTIG56 | 35926  | 36275  | 3.32 | 1.77E-03 | transcription_start_site | - | 34138  | 34138  | -1962 | 15746 | AN3432 |
| 126  | CONTIG56 | 39017  | 39590  | 3.04 | 4.57E-03 | transcription_start_site | - | 34687  | 34687  | -4616 | 15745 | AN3432 |
| 126  | CONTIG56 | 39017  | 39590  | 3.04 | 4.57E-03 | transcription_start_site | - | 34138  | 34138  | -5165 | 15746 | AN3432 |
| 1428 | CONTIG56 | 37582  | 38393  | 1.33 | 1.34E-01 | transcription_start_site | - | 34687  | 34687  | -3300 | 15745 | AN3432 |
| 1428 | CONTIG56 | 37582  | 38393  | 1.33 | 1.34E-01 | transcription_start_site | - | 34138  | 34138  | -3849 | 15746 | AN3432 |
| 126  | CONTIG56 | 39017  | 39590  | 3.04 | 4.57E-03 | transcription_start_site | - | 38713  | 38713  | -590  | 15747 | AN3433 |

|      |          |       |       |      |          |                          |   |       |       |       |       |        |
|------|----------|-------|-------|------|----------|--------------------------|---|-------|-------|-------|-------|--------|
| 126  | CONTIG56 | 39017 | 39590 | 3.04 | 4.57E-03 | transcription_start_site | - | 38544 | 38544 | -759  | 15748 | AN3433 |
| 126  | CONTIG56 | 39017 | 39590 | 3.04 | 4.57E-03 | transcription_start_site | - | 38385 | 38385 | -918  | 15749 | AN3433 |
| 1428 | CONTIG56 | 37582 | 38393 | 1.33 | 1.34E-01 | transcription_start_site | - | 38385 | 38385 | 397   | 15749 | AN3433 |
| 1428 | CONTIG56 | 37582 | 38393 | 1.33 | 1.34E-01 | transcription_start_site | - | 38544 | 38544 | 556   | 15748 | AN3433 |
| 1428 | CONTIG56 | 37582 | 38393 | 1.33 | 1.34E-01 | transcription_start_site | - | 38713 | 38713 | 725   | 15747 | AN3433 |
| 126  | CONTIG56 | 39017 | 39590 | 3.04 | 4.57E-03 | transcription_start_site | + | 43563 | 43563 | -4259 | 15754 | AN3435 |
| 126  | CONTIG56 | 39017 | 39590 | 3.04 | 4.57E-03 | transcription_start_site | + | 44189 | 44189 | -4885 | 15755 | AN3435 |
| 126  | CONTIG56 | 39017 | 39590 | 3.04 | 4.57E-03 | transcription_start_site | + | 44335 | 44335 | -5031 | 15756 | AN3435 |
| 345  | CONTIG57 | 9621  | 9892  | 2.55 | 9.96E-03 | transcription_start_site | - | 7737  | 7737  | -2019 | 15761 | AN3437 |
| 345  | CONTIG57 | 9621  | 9892  | 2.55 | 9.96E-03 | transcription_start_site | - | 7209  | 7209  | -2547 | 15762 | AN3437 |
| 90   | CONTIG57 | 14787 | 15137 | 3.12 | 1.77E-03 | transcription_start_site | - | 14504 | 14504 | -458  | 15763 | AN3438 |
| 90   | CONTIG57 | 14787 | 15137 | 3.12 | 1.77E-03 | transcription_start_site | - | 11929 | 11929 | -3033 | 15764 | AN3438 |
| 90   | CONTIG57 | 14787 | 15137 | 3.12 | 1.77E-03 | transcription_start_site | + | 16135 | 16135 | -1173 | 15765 | AN3439 |
| 90   | CONTIG57 | 14787 | 15137 | 3.12 | 1.77E-03 | transcription_start_site | + | 16299 | 16299 | -1337 | 15766 | AN3439 |
| 90   | CONTIG57 | 14787 | 15137 | 3.12 | 1.77E-03 | transcription_start_site | + | 16456 | 16456 | -1494 | 15767 | AN3439 |
| 90   | CONTIG57 | 14787 | 15137 | 3.12 | 1.77E-03 | transcription_start_site | + | 16517 | 16517 | -1555 | 15768 | AN3439 |
| 90   | CONTIG57 | 14787 | 15137 | 3.12 | 1.77E-03 | transcription_start_site | + | 16925 | 16925 | -1963 | 15769 | AN3439 |
| 953  | CONTIG57 | 24766 | 25273 | 1.77 | 6.04E-02 | transcription_start_site | - | 24408 | 24408 | -611  | 15770 | AN3441 |
| 953  | CONTIG57 | 24766 | 25273 | 1.77 | 6.04E-02 | transcription_start_site | - | 24032 | 24032 | -987  | 15771 | AN3441 |
| 953  | CONTIG57 | 24766 | 25273 | 1.77 | 6.04E-02 | transcription_start_site | - | 21729 | 21729 | -3290 | 15772 | AN3441 |
| 953  | CONTIG57 | 24766 | 25273 | 1.77 | 6.04E-02 | transcription_start_site | + | 25510 | 25510 | -490  | 15773 | AN3442 |
| 2314 | CONTIG58 | 9451  | 9957  | 0.65 | 1.38E-01 | transcription_start_site | + | 14107 | 14107 | -4403 | 15774 | AN3445 |
| 2314 | CONTIG58 | 9451  | 9957  | 0.65 | 1.38E-01 | transcription_start_site | + | 14348 | 14348 | -4644 | 15775 | AN3445 |
| 1671 | CONTIG58 | 25058 | 25703 | 1.15 | 1.06E-02 | transcription_start_site | - | 24885 | 24885 | -495  | 15788 | AN3448 |
| 1671 | CONTIG58 | 25058 | 25703 | 1.15 | 1.06E-02 | transcription_start_site | - | 24616 | 24616 | -764  | 15789 | AN3448 |
| 1671 | CONTIG58 | 25058 | 25703 | 1.15 | 1.06E-02 | transcription_start_site | - | 24380 | 24380 | -1000 | 15790 | AN3448 |
| 1671 | CONTIG58 | 25058 | 25703 | 1.15 | 1.06E-02 | transcription_start_site | - | 22978 | 22978 | -2402 | 15791 | AN3448 |
| 2277 | CONTIG58 | 29104 | 29378 | 0.7  | 1.08E-01 | transcription_start_site | - | 24885 | 24885 | -4356 | 15788 | AN3448 |
| 2277 | CONTIG58 | 29104 | 29378 | 0.7  | 1.08E-01 | transcription_start_site | - | 24616 | 24616 | -4625 | 15789 | AN3448 |
| 2277 | CONTIG58 | 29104 | 29378 | 0.7  | 1.08E-01 | transcription_start_site | - | 24380 | 24380 | -4861 | 15790 | AN3448 |
| 1671 | CONTIG58 | 25058 | 25703 | 1.15 | 1.06E-02 | transcription_start_site | + | 25956 | 25956 | -575  | 15792 | AN3449 |
| 2277 | CONTIG58 | 29104 | 29378 | 0.7  | 1.08E-01 | transcription_start_site | - | 28704 | 28704 | -537  | 15793 | AN3450 |
| 2277 | CONTIG58 | 29104 | 29378 | 0.7  | 1.08E-01 | transcription_start_site | - | 28353 | 28353 | -888  | 15794 | AN3450 |
| 1671 | CONTIG58 | 25058 | 25703 | 1.15 | 1.06E-02 | transcription_start_site | + | 29431 | 29431 | -4050 | 15795 | AN3451 |
| 1671 | CONTIG58 | 25058 | 25703 | 1.15 | 1.06E-02 | transcription_start_site | + | 29742 | 29742 | -4361 | 15796 | AN3451 |
| 1671 | CONTIG58 | 25058 | 25703 | 1.15 | 1.06E-02 | transcription_start_site | + | 30304 | 30304 | -4923 | 15797 | AN3451 |
| 1671 | CONTIG58 | 25058 | 25703 | 1.15 | 1.06E-02 | transcription_start_site | + | 30481 | 30481 | -5100 | 15798 | AN3451 |
| 1671 | CONTIG58 | 25058 | 25703 | 1.15 | 1.06E-02 | transcription_start_site | + | 30682 | 30682 | -5301 | 15799 | AN3451 |
| 2277 | CONTIG58 | 29104 | 29378 | 0.7  | 1.08E-01 | transcription_start_site | + | 29431 | 29431 | -190  | 15795 | AN3451 |
| 2277 | CONTIG58 | 29104 | 29378 | 0.7  | 1.08E-01 | transcription_start_site | + | 29742 | 29742 | -501  | 15796 | AN3451 |
| 2277 | CONTIG58 | 29104 | 29378 | 0.7  | 1.08E-01 | transcription_start_site | + | 30304 | 30304 | -1063 | 15797 | AN3451 |
| 2277 | CONTIG58 | 29104 | 29378 | 0.7  | 1.08E-01 | transcription_start_site | + | 30481 | 30481 | -1240 | 15798 | AN3451 |
| 2277 | CONTIG58 | 29104 | 29378 | 0.7  | 1.08E-01 | transcription_start_site | + | 30682 | 30682 | -1441 | 15799 | AN3451 |
| 2277 | CONTIG58 | 29104 | 29378 | 0.7  | 1.08E-01 | transcription_start_site | + | 33140 | 33140 | -3899 | 15800 | AN3451 |
| 2370 | CONTIG58 | 68258 | 69375 | 0.43 | 1.96E-01 | transcription_start_site | - | 65839 | 65839 | -2977 | 15839 | AN3462 |
| 2370 | CONTIG58 | 68258 | 69375 | 0.43 | 1.96E-01 | transcription_start_site | - | 65669 | 65669 | -3147 | 15840 | AN3462 |
| 2370 | CONTIG58 | 68258 | 69375 | 0.43 | 1.96E-01 | transcription_start_site | - | 65451 | 65451 | -3365 | 15841 | AN3462 |
| 2261 | CONTIG58 | 72163 | 72511 | 0.72 | 9.60E-02 | transcription_start_site | - | 68924 | 68924 | -3413 | 15844 | AN3464 |
| 2261 | CONTIG58 | 72163 | 72511 | 0.72 | 9.60E-02 | transcription_start_site | - | 68662 | 68662 | -3675 | 15845 | AN3464 |
| 2370 | CONTIG58 | 68258 | 69375 | 0.43 | 1.96E-01 | transcription_start_site | - | 68924 | 68924 | 107   | 15844 | AN3464 |
| 2370 | CONTIG58 | 68258 | 69375 | 0.43 | 1.96E-01 | transcription_start_site | - | 68662 | 68662 | -154  | 15845 | AN3464 |
| 2370 | CONTIG58 | 68258 | 69375 | 0.43 | 1.96E-01 | transcription_start_site | + | 69515 | 69515 | -698  | 15846 | AN3465 |
| 2370 | CONTIG58 | 68258 | 69375 | 0.43 | 1.96E-01 | transcription_start_site | + | 69746 | 69746 | -929  | 15847 | AN3465 |
| 827  | CONTIG58 | 74110 | 74534 | 1.9  | 0.00E+00 | transcription_start_site | - | 72216 | 72216 | -2106 | 15848 | AN3466 |
| 827  | CONTIG58 | 74110 | 74534 | 1.9  | 0.00E+00 | transcription_start_site | - | 71995 | 71995 | -2327 | 15849 | AN3466 |
| 827  | CONTIG58 | 74110 | 74534 | 1.9  | 0.00E+00 | transcription_start_site | - | 71888 | 71888 | -2434 | 15850 | AN3466 |
| 827  | CONTIG58 | 74110 | 74534 | 1.9  | 0.00E+00 | transcription_start_site | - | 71768 | 71768 | -2554 | 15851 | AN3466 |

|      |          |       |       |      |          |                          |   |       |       |       |       |        |
|------|----------|-------|-------|------|----------|--------------------------|---|-------|-------|-------|-------|--------|
| 827  | CONTIG58 | 74110 | 74534 | 1.9  | 0.00E+00 | transcription_start_site | - | 71651 | 71651 | -2671 | 15852 | AN3466 |
| 827  | CONTIG58 | 74110 | 74534 | 1.9  | 0.00E+00 | transcription_start_site | - | 71238 | 71238 | -3084 | 15853 | AN3466 |
| 827  | CONTIG58 | 74110 | 74534 | 1.9  | 0.00E+00 | transcription_start_site | - | 70797 | 70797 | -3525 | 15854 | AN3466 |
| 827  | CONTIG58 | 74110 | 74534 | 1.9  | 0.00E+00 | transcription_start_site | - | 70684 | 70684 | -3638 | 15855 | AN3466 |
| 827  | CONTIG58 | 74110 | 74534 | 1.9  | 0.00E+00 | transcription_start_site | - | 70576 | 70576 | -3746 | 15856 | AN3466 |
| 827  | CONTIG58 | 74110 | 74534 | 1.9  | 0.00E+00 | transcription_start_site | - | 70453 | 70453 | -3869 | 15857 | AN3466 |
| 827  | CONTIG58 | 74110 | 74534 | 1.9  | 0.00E+00 | transcription_start_site | - | 70318 | 70318 | -4004 | 15858 | AN3466 |
| 2261 | CONTIG58 | 72163 | 72511 | 0.72 | 9.60E-02 | transcription_start_site | - | 72216 | 72216 | -121  | 15848 | AN3466 |
| 2261 | CONTIG58 | 72163 | 72511 | 0.72 | 9.60E-02 | transcription_start_site | - | 71995 | 71995 | -342  | 15849 | AN3466 |
| 2261 | CONTIG58 | 72163 | 72511 | 0.72 | 9.60E-02 | transcription_start_site | - | 71888 | 71888 | -449  | 15850 | AN3466 |
| 2261 | CONTIG58 | 72163 | 72511 | 0.72 | 9.60E-02 | transcription_start_site | - | 71768 | 71768 | -569  | 15851 | AN3466 |
| 2261 | CONTIG58 | 72163 | 72511 | 0.72 | 9.60E-02 | transcription_start_site | - | 71651 | 71651 | -686  | 15852 | AN3466 |
| 2261 | CONTIG58 | 72163 | 72511 | 0.72 | 9.60E-02 | transcription_start_site | - | 71238 | 71238 | -1099 | 15853 | AN3466 |
| 2261 | CONTIG58 | 72163 | 72511 | 0.72 | 9.60E-02 | transcription_start_site | - | 70797 | 70797 | -1540 | 15854 | AN3466 |
| 2261 | CONTIG58 | 72163 | 72511 | 0.72 | 9.60E-02 | transcription_start_site | - | 70684 | 70684 | -1653 | 15855 | AN3466 |
| 2261 | CONTIG58 | 72163 | 72511 | 0.72 | 9.60E-02 | transcription_start_site | - | 70576 | 70576 | -1761 | 15856 | AN3466 |
| 2261 | CONTIG58 | 72163 | 72511 | 0.72 | 9.60E-02 | transcription_start_site | - | 70453 | 70453 | -1884 | 15857 | AN3466 |
| 2261 | CONTIG58 | 72163 | 72511 | 0.72 | 9.60E-02 | transcription_start_site | - | 70318 | 70318 | -2019 | 15858 | AN3466 |
| 2370 | CONTIG58 | 68258 | 69375 | 0.43 | 1.96E-01 | transcription_start_site | - | 70318 | 70318 | 1501  | 15858 | AN3466 |
| 2261 | CONTIG58 | 72163 | 72511 | 0.72 | 9.60E-02 | transcription_start_site | + | 72584 | 72584 | -247  | 15859 | AN3467 |
| 2261 | CONTIG58 | 72163 | 72511 | 0.72 | 9.60E-02 | transcription_start_site | + | 72658 | 72658 | -321  | 15860 | AN3467 |
| 2261 | CONTIG58 | 72163 | 72511 | 0.72 | 9.60E-02 | transcription_start_site | + | 72859 | 72859 | -522  | 15861 | AN3467 |
| 2261 | CONTIG58 | 72163 | 72511 | 0.72 | 9.60E-02 | transcription_start_site | + | 72990 | 72990 | -653  | 15862 | AN3467 |
| 2261 | CONTIG58 | 72163 | 72511 | 0.72 | 9.60E-02 | transcription_start_site | + | 73087 | 73087 | -750  | 15863 | AN3467 |
| 2370 | CONTIG58 | 68258 | 69375 | 0.43 | 1.96E-01 | transcription_start_site | + | 72584 | 72584 | -3767 | 15859 | AN3467 |
| 2370 | CONTIG58 | 68258 | 69375 | 0.43 | 1.96E-01 | transcription_start_site | + | 72658 | 72658 | -3841 | 15860 | AN3467 |
| 2370 | CONTIG58 | 68258 | 69375 | 0.43 | 1.96E-01 | transcription_start_site | + | 72859 | 72859 | -4042 | 15861 | AN3467 |
| 2370 | CONTIG58 | 68258 | 69375 | 0.43 | 1.96E-01 | transcription_start_site | + | 72990 | 72990 | -4173 | 15862 | AN3467 |
| 2370 | CONTIG58 | 68258 | 69375 | 0.43 | 1.96E-01 | transcription_start_site | + | 73087 | 73087 | -4270 | 15863 | AN3467 |
| 827  | CONTIG58 | 74110 | 74534 | 1.9  | 0.00E+00 | transcription_start_site | - | 74049 | 74049 | -273  | 15864 | AN3468 |
| 827  | CONTIG58 | 74110 | 74534 | 1.9  | 0.00E+00 | transcription_start_site | - | 73945 | 73945 | -377  | 15865 | AN3468 |
| 827  | CONTIG58 | 74110 | 74534 | 1.9  | 0.00E+00 | transcription_start_site | - | 73799 | 73799 | -523  | 15866 | AN3468 |
| 827  | CONTIG58 | 74110 | 74534 | 1.9  | 0.00E+00 | transcription_start_site | - | 73545 | 73545 | -777  | 15867 | AN3468 |
| 2221 | CONTIG58 | 77270 | 77688 | 0.77 | 7.66E-02 | transcription_start_site | - | 74049 | 74049 | -3430 | 15864 | AN3468 |
| 2221 | CONTIG58 | 77270 | 77688 | 0.77 | 7.66E-02 | transcription_start_site | - | 73945 | 73945 | -3534 | 15865 | AN3468 |
| 2221 | CONTIG58 | 77270 | 77688 | 0.77 | 7.66E-02 | transcription_start_site | - | 73799 | 73799 | -3680 | 15866 | AN3468 |
| 2221 | CONTIG58 | 77270 | 77688 | 0.77 | 7.66E-02 | transcription_start_site | - | 73545 | 73545 | -3934 | 15867 | AN3468 |
| 827  | CONTIG58 | 74110 | 74534 | 1.9  | 0.00E+00 | transcription_start_site | + | 74691 | 74691 | -369  | 15868 | AN3469 |
| 827  | CONTIG58 | 74110 | 74534 | 1.9  | 0.00E+00 | transcription_start_site | + | 74915 | 74915 | -593  | 15869 | AN3469 |
| 827  | CONTIG58 | 74110 | 74534 | 1.9  | 0.00E+00 | transcription_start_site | + | 75039 | 75039 | -717  | 15870 | AN3469 |
| 827  | CONTIG58 | 74110 | 74534 | 1.9  | 0.00E+00 | transcription_start_site | + | 75173 | 75173 | -851  | 15871 | AN3469 |
| 2261 | CONTIG58 | 72163 | 72511 | 0.72 | 9.60E-02 | transcription_start_site | + | 74691 | 74691 | -2354 | 15868 | AN3469 |
| 2261 | CONTIG58 | 72163 | 72511 | 0.72 | 9.60E-02 | transcription_start_site | + | 74915 | 74915 | -2578 | 15869 | AN3469 |
| 2261 | CONTIG58 | 72163 | 72511 | 0.72 | 9.60E-02 | transcription_start_site | + | 75039 | 75039 | -2702 | 15870 | AN3469 |
| 2261 | CONTIG58 | 72163 | 72511 | 0.72 | 9.60E-02 | transcription_start_site | + | 75173 | 75173 | -2836 | 15871 | AN3469 |
| 2221 | CONTIG58 | 77270 | 77688 | 0.77 | 7.66E-02 | transcription_start_site | - | 77132 | 77132 | -347  | 15872 | AN3470 |
| 2221 | CONTIG58 | 77270 | 77688 | 0.77 | 7.66E-02 | transcription_start_site | - | 76897 | 76897 | -582  | 15873 | AN3470 |
| 2221 | CONTIG58 | 77270 | 77688 | 0.77 | 7.66E-02 | transcription_start_site | - | 76544 | 76544 | -935  | 15874 | AN3470 |
| 2221 | CONTIG58 | 77270 | 77688 | 0.77 | 7.66E-02 | transcription_start_site | - | 76320 | 76320 | -1159 | 15875 | AN3470 |
| 2221 | CONTIG58 | 77270 | 77688 | 0.77 | 7.66E-02 | transcription_start_site | - | 76032 | 76032 | -1447 | 15876 | AN3470 |
| 1796 | CONTIG59 | 12994 | 13345 | 1.07 | 2.05E-02 | transcription_start_site | - | 10492 | 10492 | -2677 | 15890 | AN3473 |
| 1796 | CONTIG59 | 12994 | 13345 | 1.07 | 2.05E-02 | transcription_start_site | - | 12927 | 12927 | -242  | 15891 | AN3474 |
| 1796 | CONTIG59 | 12994 | 13345 | 1.07 | 2.05E-02 | transcription_start_site | + | 17946 | 17946 | -4776 | 15895 | AN3476 |
| 1600 | CONTIG59 | 29029 | 29453 | 1.2  | 1.06E-02 | transcription_start_site | - | 29036 | 29036 | -205  | 15909 | AN3480 |
| 1600 | CONTIG59 | 29029 | 29453 | 1.2  | 1.06E-02 | transcription_start_site | - | 28890 | 28890 | -351  | 15910 | AN3480 |
| 1600 | CONTIG59 | 29029 | 29453 | 1.2  | 1.06E-02 | transcription_start_site | - | 28540 | 28540 | -701  | 15911 | AN3480 |
| 1600 | CONTIG59 | 29029 | 29453 | 1.2  | 1.06E-02 | transcription_start_site | + | 31096 | 31096 | -1855 | 15912 | AN3481 |

|      |          |        |        |      |          |                          |   |        |        |       |       |        |
|------|----------|--------|--------|------|----------|--------------------------|---|--------|--------|-------|-------|--------|
| 1600 | CONTIG59 | 29029  | 29453  | 1.2  | 1.06E-02 | transcription_start_site | + | 31312  | 31312  | -2071 | 15913 | AN3481 |
| 2162 | CONTIG59 | 34146  | 34570  | 0.82 | 6.74E-02 | transcription_start_site | - | 33365  | 33365  | -993  | 15914 | AN3482 |
| 2162 | CONTIG59 | 34146  | 34570  | 0.82 | 6.74E-02 | transcription_start_site | - | 33301  | 33301  | -1057 | 15915 | AN3482 |
| 2162 | CONTIG59 | 34146  | 34570  | 0.82 | 6.74E-02 | transcription_start_site | - | 32393  | 32393  | -1965 | 15916 | AN3482 |
| 1469 | CONTIG59 | 60157  | 60951  | 1.29 | 7.08E-03 | transcription_start_site | + | 60945  | 60945  | -391  | 15933 | AN3489 |
| 1469 | CONTIG59 | 60157  | 60951  | 1.29 | 7.08E-03 | transcription_start_site | + | 61201  | 61201  | -647  | 15934 | AN3489 |
| 1469 | CONTIG59 | 60157  | 60951  | 1.29 | 7.08E-03 | transcription_start_site | + | 61574  | 61574  | -1020 | 15935 | AN3489 |
| 1469 | CONTIG59 | 60157  | 60951  | 1.29 | 7.08E-03 | transcription_start_site | + | 63320  | 63320  | -2766 | 15936 | AN3489 |
| 1469 | CONTIG59 | 60157  | 60951  | 1.29 | 7.08E-03 | transcription_start_site | + | 64095  | 64095  | -3541 | 15937 | AN3489 |
| 1145 | CONTIG59 | 91221  | 91555  | 1.57 | 1.09E-03 | transcription_start_site | - | 88430  | 88430  | -2958 | 15957 | AN3497 |
| 1145 | CONTIG59 | 91221  | 91555  | 1.57 | 1.09E-03 | transcription_start_site | - | 87770  | 87770  | -3618 | 15958 | AN3497 |
| 2066 | CONTIG59 | 93316  | 93585  | 0.9  | 4.78E-02 | transcription_start_site | - | 88430  | 88430  | -5020 | 15957 | AN3497 |
| 1145 | CONTIG59 | 91221  | 91555  | 1.57 | 1.09E-03 | transcription_start_site | - | 91025  | 91025  | -363  | 15964 | AN3498 |
| 1145 | CONTIG59 | 91221  | 91555  | 1.57 | 1.09E-03 | transcription_start_site | - | 91820  | 91820  | 432   | 15963 | AN3498 |
| 1145 | CONTIG59 | 91221  | 91555  | 1.57 | 1.09E-03 | transcription_start_site | - | 92059  | 92059  | 671   | 15962 | AN3498 |
| 1145 | CONTIG59 | 91221  | 91555  | 1.57 | 1.09E-03 | transcription_start_site | - | 90445  | 90445  | -943  | 15965 | AN3498 |
| 1145 | CONTIG59 | 91221  | 91555  | 1.57 | 1.09E-03 | transcription_start_site | - | 92516  | 92516  | 1128  | 15961 | AN3498 |
| 1145 | CONTIG59 | 91221  | 91555  | 1.57 | 1.09E-03 | transcription_start_site | - | 90204  | 90204  | -1184 | 15966 | AN3498 |
| 1145 | CONTIG59 | 91221  | 91555  | 1.57 | 1.09E-03 | transcription_start_site | - | 90156  | 90156  | -1232 | 15967 | AN3498 |
| 2066 | CONTIG59 | 93316  | 93585  | 0.9  | 4.78E-02 | transcription_start_site | - | 93116  | 93116  | -334  | 15959 | AN3498 |
| 2066 | CONTIG59 | 93316  | 93585  | 0.9  | 4.78E-02 | transcription_start_site | - | 92664  | 92664  | -786  | 15960 | AN3498 |
| 2066 | CONTIG59 | 93316  | 93585  | 0.9  | 4.78E-02 | transcription_start_site | - | 92516  | 92516  | -934  | 15961 | AN3498 |
| 2066 | CONTIG59 | 93316  | 93585  | 0.9  | 4.78E-02 | transcription_start_site | - | 92059  | 92059  | -1391 | 15962 | AN3498 |
| 2066 | CONTIG59 | 93316  | 93585  | 0.9  | 4.78E-02 | transcription_start_site | - | 91820  | 91820  | -1630 | 15963 | AN3498 |
| 2066 | CONTIG59 | 93316  | 93585  | 0.9  | 4.78E-02 | transcription_start_site | - | 91025  | 91025  | -2425 | 15964 | AN3498 |
| 2066 | CONTIG59 | 93316  | 93585  | 0.9  | 4.78E-02 | transcription_start_site | - | 90445  | 90445  | -3005 | 15965 | AN3498 |
| 2066 | CONTIG59 | 93316  | 93585  | 0.9  | 4.78E-02 | transcription_start_site | - | 90204  | 90204  | -3246 | 15966 | AN3498 |
| 2066 | CONTIG59 | 93316  | 93585  | 0.9  | 4.78E-02 | transcription_start_site | - | 90156  | 90156  | -3294 | 15967 | AN3498 |
| 1145 | CONTIG59 | 91221  | 91555  | 1.57 | 1.09E-03 | transcription_start_site | + | 93548  | 93548  | -2160 | 15968 | AN3499 |
| 1145 | CONTIG59 | 91221  | 91555  | 1.57 | 1.09E-03 | transcription_start_site | + | 93671  | 93671  | -2283 | 15969 | AN3499 |
| 1145 | CONTIG59 | 91221  | 91555  | 1.57 | 1.09E-03 | transcription_start_site | + | 93796  | 93796  | -2408 | 15970 | AN3499 |
| 2066 | CONTIG59 | 93316  | 93585  | 0.9  | 4.78E-02 | transcription_start_site | + | 93548  | 93548  | -97   | 15968 | AN3499 |
| 2066 | CONTIG59 | 93316  | 93585  | 0.9  | 4.78E-02 | transcription_start_site | + | 93671  | 93671  | -220  | 15969 | AN3499 |
| 2066 | CONTIG59 | 93316  | 93585  | 0.9  | 4.78E-02 | transcription_start_site | + | 93796  | 93796  | -345  | 15970 | AN3499 |
| 1145 | CONTIG59 | 91221  | 91555  | 1.57 | 1.09E-03 | transcription_start_site | + | 95438  | 95438  | -4050 | 15971 | AN3500 |
| 1145 | CONTIG59 | 91221  | 91555  | 1.57 | 1.09E-03 | transcription_start_site | + | 95999  | 95999  | -4611 | 15972 | AN3500 |
| 2066 | CONTIG59 | 93316  | 93585  | 0.9  | 4.78E-02 | transcription_start_site | + | 95438  | 95438  | -1987 | 15971 | AN3500 |
| 2066 | CONTIG59 | 93316  | 93585  | 0.9  | 4.78E-02 | transcription_start_site | + | 95999  | 95999  | -2548 | 15972 | AN3500 |
| 2066 | CONTIG59 | 93316  | 93585  | 0.9  | 4.78E-02 | transcription_start_site | + | 96750  | 96750  | -3299 | 15973 | AN3500 |
| 2066 | CONTIG59 | 93316  | 93585  | 0.9  | 4.78E-02 | transcription_start_site | + | 97067  | 97067  | -3616 | 15974 | AN3500 |
| 2066 | CONTIG59 | 93316  | 93585  | 0.9  | 4.78E-02 | transcription_start_site | + | 97414  | 97414  | -3963 | 15975 | AN3500 |
| 2066 | CONTIG59 | 93316  | 93585  | 0.9  | 4.78E-02 | transcription_start_site | + | 97975  | 97975  | -4524 | 15976 | AN3501 |
| 2066 | CONTIG59 | 93316  | 93585  | 0.9  | 4.78E-02 | transcription_start_site | + | 98335  | 98335  | -4884 | 15977 | AN3501 |
| 2244 | CONTIG59 | 114979 | 115339 | 0.75 | 9.60E-02 | transcription_start_site | - | 113118 | 113118 | -2041 | 16006 | AN3505 |
| 2244 | CONTIG59 | 114979 | 115339 | 0.75 | 9.60E-02 | transcription_start_site | - | 112917 | 112917 | -2242 | 16007 | AN3505 |
| 2244 | CONTIG59 | 114979 | 115339 | 0.75 | 9.60E-02 | transcription_start_site | - | 112036 | 112036 | -3123 | 16008 | AN3505 |
| 2310 | CONTIG59 | 115655 | 116619 | 0.65 | 8.32E-02 | transcription_start_site | - | 113118 | 113118 | -3019 | 16006 | AN3505 |
| 2310 | CONTIG59 | 115655 | 116619 | 0.65 | 8.32E-02 | transcription_start_site | - | 112917 | 112917 | -3220 | 16007 | AN3505 |
| 2310 | CONTIG59 | 115655 | 116619 | 0.65 | 8.32E-02 | transcription_start_site | - | 112036 | 112036 | -4101 | 16008 | AN3505 |
| 2329 | CONTIG59 | 114226 | 114803 | 0.62 | 1.76E-01 | transcription_start_site | - | 113118 | 113118 | -1396 | 16006 | AN3505 |
| 2329 | CONTIG59 | 114226 | 114803 | 0.62 | 1.76E-01 | transcription_start_site | - | 112917 | 112917 | -1597 | 16007 | AN3505 |
| 2329 | CONTIG59 | 114226 | 114803 | 0.62 | 1.76E-01 | transcription_start_site | - | 112036 | 112036 | -2478 | 16008 | AN3505 |
| 2244 | CONTIG59 | 114979 | 115339 | 0.75 | 9.60E-02 | transcription_start_site | + | 116305 | 116305 | -1146 | 16009 | AN3506 |
| 2244 | CONTIG59 | 114979 | 115339 | 0.75 | 9.60E-02 | transcription_start_site | + | 116421 | 116421 | -1262 | 16010 | AN3506 |
| 2310 | CONTIG59 | 115655 | 116619 | 0.65 | 8.32E-02 | transcription_start_site | + | 116305 | 116305 | -168  | 16009 | AN3506 |
| 2310 | CONTIG59 | 115655 | 116619 | 0.65 | 8.32E-02 | transcription_start_site | + | 116421 | 116421 | -284  | 16010 | AN3506 |
| 2329 | CONTIG59 | 114226 | 114803 | 0.62 | 1.76E-01 | transcription_start_site | + | 116305 | 116305 | -1790 | 16009 | AN3506 |

|      |          |        |        |      |          |                          |   |        |        |       |       |        |
|------|----------|--------|--------|------|----------|--------------------------|---|--------|--------|-------|-------|--------|
| 2329 | CONTIG59 | 114226 | 114803 | 0.62 | 1.76E-01 | transcription_start_site | + | 116421 | 116421 | -1906 | 16010 | AN3506 |
| 2244 | CONTIG59 | 114979 | 115339 | 0.75 | 9.60E-02 | transcription_start_site | + | 118053 | 118053 | -2894 | 16011 | AN3507 |
| 2244 | CONTIG59 | 114979 | 115339 | 0.75 | 9.60E-02 | transcription_start_site | + | 118274 | 118274 | -3115 | 16012 | AN3507 |
| 2244 | CONTIG59 | 114979 | 115339 | 0.75 | 9.60E-02 | transcription_start_site | + | 118503 | 118503 | -3344 | 16013 | AN3507 |
| 2310 | CONTIG59 | 115655 | 116619 | 0.65 | 8.32E-02 | transcription_start_site | + | 118053 | 118053 | -1916 | 16011 | AN3507 |
| 2310 | CONTIG59 | 115655 | 116619 | 0.65 | 8.32E-02 | transcription_start_site | + | 118274 | 118274 | -2137 | 16012 | AN3507 |
| 2310 | CONTIG59 | 115655 | 116619 | 0.65 | 8.32E-02 | transcription_start_site | + | 118503 | 118503 | -2366 | 16013 | AN3507 |
| 2329 | CONTIG59 | 114226 | 114803 | 0.62 | 1.76E-01 | transcription_start_site | + | 118053 | 118053 | -3538 | 16011 | AN3507 |
| 2329 | CONTIG59 | 114226 | 114803 | 0.62 | 1.76E-01 | transcription_start_site | + | 118274 | 118274 | -3759 | 16012 | AN3507 |
| 2329 | CONTIG59 | 114226 | 114803 | 0.62 | 1.76E-01 | transcription_start_site | + | 118503 | 118503 | -3988 | 16013 | AN3507 |
| 2310 | CONTIG59 | 115655 | 116619 | 0.65 | 8.32E-02 | transcription_start_site | + | 120356 | 120356 | -4219 | 16017 | AN3509 |
| 2310 | CONTIG59 | 115655 | 116619 | 0.65 | 8.32E-02 | transcription_start_site | + | 120835 | 120835 | -4698 | 16018 | AN3509 |
| 2312 | CONTIG59 | 127895 | 128694 | 0.65 | 9.90E-02 | transcription_start_site | - | 123478 | 123478 | -4816 | 16019 | AN3510 |
| 2312 | CONTIG59 | 127895 | 128694 | 0.65 | 9.90E-02 | transcription_start_site | - | 123270 | 123270 | -5024 | 16020 | AN3510 |
| 1405 | CONTIG59 | 129620 | 130042 | 1.34 | 5.08E-03 | transcription_start_site | + | 131032 | 131032 | -1201 | 16023 | AN3512 |
| 1405 | CONTIG59 | 129620 | 130042 | 1.34 | 5.08E-03 | transcription_start_site | + | 131150 | 131150 | -1319 | 16024 | AN3512 |
| 1900 | CONTIG59 | 130580 | 131829 | 1    | 1.44E-02 | transcription_start_site | + | 131150 | 131150 | 54    | 16024 | AN3512 |
| 1900 | CONTIG59 | 130580 | 131829 | 1    | 1.44E-02 | transcription_start_site | + | 131032 | 131032 | 172   | 16023 | AN3512 |
| 2312 | CONTIG59 | 127895 | 128694 | 0.65 | 9.90E-02 | transcription_start_site | + | 131032 | 131032 | -2737 | 16023 | AN3512 |
| 2312 | CONTIG59 | 127895 | 128694 | 0.65 | 9.90E-02 | transcription_start_site | + | 131150 | 131150 | -2855 | 16024 | AN3512 |
| 1952 | CONTIG59 | 137637 | 138051 | 0.97 | 3.34E-02 | transcription_start_site | - | 135386 | 135386 | -2458 | 16025 | AN3513 |
| 1952 | CONTIG59 | 137637 | 138051 | 0.97 | 3.34E-02 | transcription_start_site | - | 137040 | 137040 | -804  | 16026 | AN3514 |
| 1952 | CONTIG59 | 137637 | 138051 | 0.97 | 3.34E-02 | transcription_start_site | - | 136738 | 136738 | -1106 | 16027 | AN3514 |
| 1952 | CONTIG59 | 137637 | 138051 | 0.97 | 3.34E-02 | transcription_start_site | - | 136604 | 136604 | -1240 | 16028 | AN3514 |
| 1953 | CONTIG59 | 142502 | 142791 | 0.97 | 3.34E-02 | transcription_start_site | - | 142326 | 142326 | -320  | 16029 | AN3515 |
| 900  | CONTIG59 | 150167 | 150523 | 1.82 | 0.00E+00 | transcription_start_site | + | 151148 | 151148 | -803  | 16030 | AN3517 |
| 900  | CONTIG59 | 150167 | 150523 | 1.82 | 0.00E+00 | transcription_start_site | + | 154219 | 154219 | -3874 | 16033 | AN3519 |
| 900  | CONTIG59 | 150167 | 150523 | 1.82 | 0.00E+00 | transcription_start_site | + | 154344 | 154344 | -3999 | 16034 | AN3519 |
| 900  | CONTIG59 | 150167 | 150523 | 1.82 | 0.00E+00 | transcription_start_site | + | 154924 | 154924 | -4579 | 16035 | AN3519 |
| 900  | CONTIG59 | 150167 | 150523 | 1.82 | 0.00E+00 | transcription_start_site | + | 155182 | 155182 | -4837 | 16036 | AN3519 |
| 900  | CONTIG59 | 150167 | 150523 | 1.82 | 0.00E+00 | transcription_start_site | + | 155459 | 155459 | -5114 | 16037 | AN3519 |
| 2263 | CONTIG59 | 170343 | 170774 | 0.72 | 1.08E-01 | transcription_start_site | - | 169369 | 169369 | -1189 | 16053 | AN3524 |
| 2263 | CONTIG59 | 170343 | 170774 | 0.72 | 1.08E-01 | transcription_start_site | - | 169186 | 169186 | -1372 | 16054 | AN3524 |
| 2263 | CONTIG59 | 170343 | 170774 | 0.72 | 1.08E-01 | transcription_start_site | - | 169000 | 169000 | -1558 | 16055 | AN3524 |
| 703  | CONTIG60 | 11926  | 12225  | 2.04 | 0.00E+00 | transcription_start_site | - | 11641  | 11641  | -434  | 16069 | AN3529 |
| 703  | CONTIG60 | 11926  | 12225  | 2.04 | 0.00E+00 | transcription_start_site | - | 11270  | 11270  | -805  | 16070 | AN3529 |
| 703  | CONTIG60 | 11926  | 12225  | 2.04 | 0.00E+00 | transcription_start_site | + | 13401  | 13401  | -1325 | 16071 | AN3530 |
| 703  | CONTIG60 | 11926  | 12225  | 2.04 | 0.00E+00 | transcription_start_site | + | 13656  | 13656  | -1580 | 16072 | AN3530 |
| 703  | CONTIG60 | 11926  | 12225  | 2.04 | 0.00E+00 | transcription_start_site | + | 13977  | 13977  | -1901 | 16073 | AN3530 |
| 703  | CONTIG60 | 11926  | 12225  | 2.04 | 0.00E+00 | transcription_start_site | + | 14293  | 14293  | -2217 | 16074 | AN3530 |
| 703  | CONTIG60 | 11926  | 12225  | 2.04 | 0.00E+00 | transcription_start_site | + | 14473  | 14473  | -2397 | 16075 | AN3530 |
| 703  | CONTIG60 | 11926  | 12225  | 2.04 | 0.00E+00 | transcription_start_site | + | 15993  | 15993  | -3917 | 16076 | AN3531 |
| 2278 | CONTIG60 | 27921  | 28354  | 0.7  | 1.08E-01 | transcription_start_site | - | 26067  | 26067  | -2070 | 16082 | AN3534 |
| 2278 | CONTIG60 | 27921  | 28354  | 0.7  | 1.08E-01 | transcription_start_site | - | 25570  | 25570  | -2567 | 16083 | AN3534 |
| 2278 | CONTIG60 | 27921  | 28354  | 0.7  | 1.08E-01 | transcription_start_site | - | 25201  | 25201  | -2936 | 16084 | AN3534 |
| 2278 | CONTIG60 | 27921  | 28354  | 0.7  | 1.08E-01 | transcription_start_site | - | 24995  | 24995  | -3142 | 16085 | AN3534 |
| 2278 | CONTIG60 | 27921  | 28354  | 0.7  | 1.08E-01 | transcription_start_site | - | 24886  | 24886  | -3251 | 16086 | AN3534 |
| 1563 | CONTIG60 | 40743  | 41017  | 1.22 | 7.70E-03 | transcription_start_site | - | 37757  | 37757  | -3123 | 16088 | AN3536 |
| 1563 | CONTIG60 | 40743  | 41017  | 1.22 | 7.70E-03 | transcription_start_site | - | 37628  | 37628  | -3252 | 16089 | AN3536 |
| 1563 | CONTIG60 | 40743  | 41017  | 1.22 | 7.70E-03 | transcription_start_site | - | 37380  | 37380  | -3500 | 16090 | AN3536 |
| 1563 | CONTIG60 | 40743  | 41017  | 1.22 | 7.70E-03 | transcription_start_site | - | 36844  | 36844  | -4036 | 16091 | AN3536 |
| 1563 | CONTIG60 | 40743  | 41017  | 1.22 | 7.70E-03 | transcription_start_site | - | 36563  | 36563  | -4317 | 16092 | AN3536 |
| 2333 | CONTIG60 | 39751  | 39962  | 0.6  | 2.63E-02 | transcription_start_site | - | 37757  | 37757  | -2099 | 16088 | AN3536 |
| 2333 | CONTIG60 | 39751  | 39962  | 0.6  | 2.63E-02 | transcription_start_site | - | 37628  | 37628  | -2228 | 16089 | AN3536 |
| 2333 | CONTIG60 | 39751  | 39962  | 0.6  | 2.63E-02 | transcription_start_site | - | 37380  | 37380  | -2476 | 16090 | AN3536 |
| 2333 | CONTIG60 | 39751  | 39962  | 0.6  | 2.63E-02 | transcription_start_site | - | 36844  | 36844  | -3012 | 16091 | AN3536 |
| 2333 | CONTIG60 | 39751  | 39962  | 0.6  | 2.63E-02 | transcription_start_site | - | 36563  | 36563  | -3293 | 16092 | AN3536 |



|      |          |        |        |      |          |                          |   |        |        |       |       |        |
|------|----------|--------|--------|------|----------|--------------------------|---|--------|--------|-------|-------|--------|
| 2333 | CONTIG60 | 39751  | 39962  | 0.6  | 2.63E-02 | transcription_start_site | + | 39295  | 39295  | 561   | 16095 | AN3537 |
| 1563 | CONTIG60 | 40743  | 41017  | 1.22 | 7.70E-03 | transcription_start_site | + | 41098  | 41098  | -218  | 16096 | AN3538 |
| 2333 | CONTIG60 | 39751  | 39962  | 0.6  | 2.63E-02 | transcription_start_site | + | 41098  | 41098  | -1241 | 16096 | AN3538 |
| 2311 | CONTIG60 | 55361  | 55795  | 0.65 | 8.54E-02 | transcription_start_site | + | 54535  | 54535  | 1043  | 16106 | AN3541 |
| 1534 | CONTIG61 | 50495  | 50754  | 1.25 | 6.74E-02 | transcription_start_site | + | 50081  | 50081  | 543   | 16162 | AN3556 |
| 1534 | CONTIG61 | 50495  | 50754  | 1.25 | 6.74E-02 | transcription_start_site | + | 52057  | 52057  | -1432 | 16163 | AN3557 |
| 1534 | CONTIG61 | 50495  | 50754  | 1.25 | 6.74E-02 | transcription_start_site | + | 53260  | 53260  | -2635 | 16164 | AN3557 |
| 411  | CONTIG61 | 73220  | 73554  | 2.43 | 8.43E-04 | transcription_start_site | - | 71987  | 71987  | -1400 | 16192 | AN3564 |
| 411  | CONTIG61 | 73220  | 73554  | 2.43 | 8.43E-04 | transcription_start_site | - | 71884  | 71884  | -1503 | 16193 | AN3564 |
| 411  | CONTIG61 | 73220  | 73554  | 2.43 | 8.43E-04 | transcription_start_site | - | 71495  | 71495  | -1892 | 16194 | AN3564 |
| 411  | CONTIG61 | 73220  | 73554  | 2.43 | 8.43E-04 | transcription_start_site | - | 70896  | 70896  | -2491 | 16195 | AN3564 |
| 411  | CONTIG61 | 73220  | 73554  | 2.43 | 8.43E-04 | transcription_start_site | + | 72892  | 72892  | 495   | 16197 | AN3565 |
| 411  | CONTIG61 | 73220  | 73554  | 2.43 | 8.43E-04 | transcription_start_site | + | 72282  | 72282  | 1105  | 16196 | AN3565 |
| 411  | CONTIG61 | 73220  | 73554  | 2.43 | 8.43E-04 | transcription_start_site | + | 73753  | 73753  | -366  | 16198 | AN3566 |
| 385  | CONTIG61 | 98928  | 99224  | 2.47 | 7.06E-04 | transcription_start_site | - | 95057  | 95057  | -4019 | 16219 | AN3572 |
| 385  | CONTIG61 | 98928  | 99224  | 2.47 | 7.06E-04 | transcription_start_site | - | 94977  | 94977  | -4099 | 16220 | AN3572 |
| 385  | CONTIG61 | 98928  | 99224  | 2.47 | 7.06E-04 | transcription_start_site | - | 99406  | 99406  | 330   | 16230 | AN3574 |
| 385  | CONTIG61 | 98928  | 99224  | 2.47 | 7.06E-04 | transcription_start_site | - | 98737  | 98737  | -339  | 16231 | AN3574 |
| 385  | CONTIG61 | 98928  | 99224  | 2.47 | 7.06E-04 | transcription_start_site | - | 99485  | 99485  | 409   | 16229 | AN3574 |
| 385  | CONTIG61 | 98928  | 99224  | 2.47 | 7.06E-04 | transcription_start_site | - | 99772  | 99772  | 696   | 16228 | AN3574 |
| 385  | CONTIG61 | 98928  | 99224  | 2.47 | 7.06E-04 | transcription_start_site | - | 100077 | 100077 | 1001  | 16227 | AN3574 |
| 385  | CONTIG61 | 98928  | 99224  | 2.47 | 7.06E-04 | transcription_start_site | + | 101626 | 101626 | -2550 | 16232 | AN3575 |
| 385  | CONTIG61 | 98928  | 99224  | 2.47 | 7.06E-04 | transcription_start_site | + | 101779 | 101779 | -2703 | 16233 | AN3575 |
| 385  | CONTIG61 | 98928  | 99224  | 2.47 | 7.06E-04 | transcription_start_site | + | 102179 | 102179 | -3103 | 16234 | AN3575 |
| 385  | CONTIG61 | 98928  | 99224  | 2.47 | 7.06E-04 | transcription_start_site | + | 102968 | 102968 | -3892 | 16235 | AN3575 |
| 1109 | CONTIG61 | 135470 | 135894 | 1.6  | 1.06E-02 | transcription_start_site | - | 131776 | 131776 | -3906 | 16261 | AN3585 |
| 1109 | CONTIG61 | 135470 | 135894 | 1.6  | 1.06E-02 | transcription_start_site | - | 131350 | 131350 | -4332 | 16262 | AN3585 |
| 1109 | CONTIG61 | 135470 | 135894 | 1.6  | 1.06E-02 | transcription_start_site | + | 137531 | 137531 | -1849 | 16265 | AN3587 |
| 1109 | CONTIG61 | 135470 | 135894 | 1.6  | 1.06E-02 | transcription_start_site | + | 137760 | 137760 | -2078 | 16266 | AN3587 |
| 1109 | CONTIG61 | 135470 | 135894 | 1.6  | 1.06E-02 | transcription_start_site | + | 137967 | 137967 | -2285 | 16267 | AN3587 |
| 1109 | CONTIG61 | 135470 | 135894 | 1.6  | 1.06E-02 | transcription_start_site | + | 138035 | 138035 | -2353 | 16268 | AN3587 |
| 119  | CONTIG61 | 149495 | 149919 | 3.04 | 0.00E+00 | transcription_start_site | - | 145513 | 145513 | -4194 | 16271 | AN3589 |
| 119  | CONTIG61 | 149495 | 149919 | 3.04 | 0.00E+00 | transcription_start_site | - | 145421 | 145421 | -4286 | 16272 | AN3589 |
| 119  | CONTIG61 | 149495 | 149919 | 3.04 | 0.00E+00 | transcription_start_site | - | 145311 | 145311 | -4396 | 16273 | AN3589 |
| 119  | CONTIG61 | 149495 | 149919 | 3.04 | 0.00E+00 | transcription_start_site | - | 149192 | 149192 | -515  | 16278 | AN3591 |
| 119  | CONTIG61 | 149495 | 149919 | 3.04 | 0.00E+00 | transcription_start_site | - | 148587 | 148587 | -1120 | 16279 | AN3591 |
| 119  | CONTIG61 | 149495 | 149919 | 3.04 | 0.00E+00 | transcription_start_site | - | 150897 | 150897 | 1190  | 16284 | AN3592 |
| 119  | CONTIG61 | 149495 | 149919 | 3.04 | 0.00E+00 | transcription_start_site | + | 153263 | 153263 | -3556 | 16285 | AN3593 |
| 119  | CONTIG61 | 149495 | 149919 | 3.04 | 0.00E+00 | transcription_start_site | + | 153469 | 153469 | -3762 | 16286 | AN3593 |
| 119  | CONTIG61 | 149495 | 149919 | 3.04 | 0.00E+00 | transcription_start_site | + | 153996 | 153996 | -4289 | 16287 | AN3593 |
| 119  | CONTIG61 | 149495 | 149919 | 3.04 | 0.00E+00 | transcription_start_site | + | 154612 | 154612 | -4905 | 16288 | AN3594 |
| 119  | CONTIG61 | 149495 | 149919 | 3.04 | 0.00E+00 | transcription_start_site | + | 154707 | 154707 | -5000 | 16289 | AN3594 |
| 773  | CONTIG61 | 164271 | 164691 | 1.97 | 3.17E-03 | transcription_start_site | - | 162305 | 162305 | -2176 | 16297 | AN3597 |
| 773  | CONTIG61 | 164271 | 164691 | 1.97 | 3.17E-03 | transcription_start_site | - | 161268 | 161268 | -3213 | 16298 | AN3597 |
| 773  | CONTIG61 | 164271 | 164691 | 1.97 | 3.17E-03 | transcription_start_site | - | 160508 | 160508 | -3973 | 16299 | AN3597 |
| 773  | CONTIG61 | 164271 | 164691 | 1.97 | 3.17E-03 | transcription_start_site | - | 165596 | 165596 | 1115  | 16303 | AN3598 |
| 773  | CONTIG61 | 164271 | 164691 | 1.97 | 3.17E-03 | transcription_start_site | - | 165688 | 165688 | 1207  | 16302 | AN3598 |
| 44   | CONTIG61 | 171243 | 171593 | 3.27 | 0.00E+00 | transcription_start_site | - | 167717 | 167717 | -3701 | 16304 | AN3599 |
| 44   | CONTIG61 | 171243 | 171593 | 3.27 | 0.00E+00 | transcription_start_site | - | 167273 | 167273 | -4145 | 16305 | AN3599 |
| 44   | CONTIG61 | 171243 | 171593 | 3.27 | 0.00E+00 | transcription_start_site | - | 167156 | 167156 | -4262 | 16306 | AN3599 |
| 44   | CONTIG61 | 171243 | 171593 | 3.27 | 0.00E+00 | transcription_start_site | - | 166919 | 166919 | -4499 | 16307 | AN3599 |
| 44   | CONTIG61 | 171243 | 171593 | 3.27 | 0.00E+00 | transcription_start_site | - | 170064 | 170064 | -1354 | 16308 | AN3600 |
| 44   | CONTIG61 | 171243 | 171593 | 3.27 | 0.00E+00 | transcription_start_site | + | 175146 | 175146 | -3728 | 16311 | AN3602 |
| 44   | CONTIG61 | 171243 | 171593 | 3.27 | 0.00E+00 | transcription_start_site | + | 176054 | 176054 | -4636 | 16312 | AN3602 |
| 1375 | CONTIG61 | 252379 | 252733 | 1.37 | 2.30E-02 | transcription_start_site | - | 249995 | 249995 | -2561 | 16356 | AN3620 |
| 1375 | CONTIG61 | 252379 | 252733 | 1.37 | 2.30E-02 | transcription_start_site | + | 251607 | 251607 | 949   | 16361 | AN3621 |
| 1375 | CONTIG61 | 252379 | 252733 | 1.37 | 2.30E-02 | transcription_start_site | + | 251427 | 251427 | 1129  | 16360 | AN3621 |

|      |          |        |        |      |          |                          |   |        |        |       |       |        |
|------|----------|--------|--------|------|----------|--------------------------|---|--------|--------|-------|-------|--------|
| 1375 | CONTIG61 | 252379 | 252733 | 1.37 | 2.30E-02 | transcription_start_site | + | 253369 | 253369 | -813  | 16362 | AN3622 |
| 1375 | CONTIG61 | 252379 | 252733 | 1.37 | 2.30E-02 | transcription_start_site | + | 253598 | 253598 | -1042 | 16363 | AN3622 |
| 1375 | CONTIG61 | 252379 | 252733 | 1.37 | 2.30E-02 | transcription_start_site | + | 254371 | 254371 | -1815 | 16364 | AN3622 |
| 1375 | CONTIG61 | 252379 | 252733 | 1.37 | 2.30E-02 | transcription_start_site | + | 257428 | 257428 | -4872 | 16366 | AN3624 |
| 590  | CONTIG61 | 269343 | 269677 | 2.2  | 1.14E-03 | transcription_start_site | - | 268847 | 268847 | -663  | 16374 | AN3627 |
| 590  | CONTIG61 | 269343 | 269677 | 2.2  | 1.14E-03 | transcription_start_site | - | 268672 | 268672 | -838  | 16375 | AN3627 |
| 590  | CONTIG61 | 269343 | 269677 | 2.2  | 1.14E-03 | transcription_start_site | - | 268294 | 268294 | -1216 | 16376 | AN3627 |
| 590  | CONTIG61 | 269343 | 269677 | 2.2  | 1.14E-03 | transcription_start_site | - | 268047 | 268047 | -1463 | 16377 | AN3627 |
| 590  | CONTIG61 | 269343 | 269677 | 2.2  | 1.14E-03 | transcription_start_site | - | 267725 | 267725 | -1785 | 16378 | AN3627 |
| 590  | CONTIG61 | 269343 | 269677 | 2.2  | 1.14E-03 | transcription_start_site | - | 267535 | 267535 | -1975 | 16379 | AN3627 |
| 590  | CONTIG61 | 269343 | 269677 | 2.2  | 1.14E-03 | transcription_start_site | - | 267348 | 267348 | -2162 | 16380 | AN3627 |
| 590  | CONTIG61 | 269343 | 269677 | 2.2  | 1.14E-03 | transcription_start_site | - | 270516 | 270516 | 1006  | 16383 | AN3628 |
| 1048 | CONTIG61 | 291913 | 292199 | 1.67 | 1.80E-02 | transcription_start_site | - | 288737 | 288737 | -3319 | 16395 | AN3634 |
| 1048 | CONTIG61 | 291913 | 292199 | 1.67 | 1.80E-02 | transcription_start_site | - | 288353 | 288353 | -3703 | 16396 | AN3634 |
| 1048 | CONTIG61 | 291913 | 292199 | 1.67 | 1.80E-02 | transcription_start_site | - | 291888 | 291888 | -168  | 16398 | AN3636 |
| 1048 | CONTIG61 | 291913 | 292199 | 1.67 | 1.80E-02 | transcription_start_site | + | 292440 | 292440 | -384  | 16399 | AN3637 |
| 1048 | CONTIG61 | 291913 | 292199 | 1.67 | 1.80E-02 | transcription_start_site | + | 292616 | 292616 | -560  | 16400 | AN3637 |
| 1048 | CONTIG61 | 291913 | 292199 | 1.67 | 1.80E-02 | transcription_start_site | + | 292774 | 292774 | -718  | 16401 | AN3637 |
| 1048 | CONTIG61 | 291913 | 292199 | 1.67 | 1.80E-02 | transcription_start_site | + | 294209 | 294209 | -2153 | 16402 | AN3637 |
| 1048 | CONTIG61 | 291913 | 292199 | 1.67 | 1.80E-02 | transcription_start_site | + | 296255 | 296255 | -4199 | 16405 | AN3639 |
| 1048 | CONTIG61 | 291913 | 292199 | 1.67 | 1.80E-02 | transcription_start_site | + | 296527 | 296527 | -4471 | 16406 | AN3639 |
| 1048 | CONTIG61 | 291913 | 292199 | 1.67 | 1.80E-02 | transcription_start_site | + | 296684 | 296684 | -4628 | 16407 | AN3639 |
| 1048 | CONTIG61 | 291913 | 292199 | 1.67 | 1.80E-02 | transcription_start_site | + | 296812 | 296812 | -4756 | 16408 | AN3639 |
| 1251 | CONTIG61 | 304067 | 304947 | 1.48 | 3.34E-02 | transcription_start_site | - | 300911 | 300911 | -3596 | 16409 | AN3640 |
| 1251 | CONTIG61 | 304067 | 304947 | 1.48 | 3.34E-02 | transcription_start_site | - | 303271 | 303271 | -1236 | 16410 | AN3641 |
| 1251 | CONTIG61 | 304067 | 304947 | 1.48 | 3.34E-02 | transcription_start_site | - | 302943 | 302943 | -1564 | 16411 | AN3641 |
| 1566 | CONTIG61 | 306752 | 307191 | 1.22 | 4.21E-02 | transcription_start_site | - | 303271 | 303271 | -3700 | 16410 | AN3641 |
| 1566 | CONTIG61 | 306752 | 307191 | 1.22 | 4.21E-02 | transcription_start_site | - | 302943 | 302943 | -4028 | 16411 | AN3641 |
| 1251 | CONTIG61 | 304067 | 304947 | 1.48 | 3.34E-02 | transcription_start_site | + | 305580 | 305580 | -1073 | 16412 | AN3642 |
| 1251 | CONTIG61 | 304067 | 304947 | 1.48 | 3.34E-02 | transcription_start_site | + | 305899 | 305899 | -1392 | 16413 | AN3642 |
| 1251 | CONTIG61 | 304067 | 304947 | 1.48 | 3.34E-02 | transcription_start_site | + | 306427 | 306427 | -1920 | 16414 | AN3642 |
| 1251 | CONTIG61 | 304067 | 304947 | 1.48 | 3.34E-02 | transcription_start_site | + | 306569 | 306569 | -2062 | 16415 | AN3642 |
| 1251 | CONTIG61 | 304067 | 304947 | 1.48 | 3.34E-02 | transcription_start_site | + | 307095 | 307095 | -2588 | 16416 | AN3642 |
| 1566 | CONTIG61 | 306752 | 307191 | 1.22 | 4.21E-02 | transcription_start_site | + | 307095 | 307095 | -123  | 16416 | AN3642 |
| 1566 | CONTIG61 | 306752 | 307191 | 1.22 | 4.21E-02 | transcription_start_site | + | 306569 | 306569 | 402   | 16415 | AN3642 |
| 1566 | CONTIG61 | 306752 | 307191 | 1.22 | 4.21E-02 | transcription_start_site | + | 306427 | 306427 | 544   | 16414 | AN3642 |
| 1566 | CONTIG61 | 306752 | 307191 | 1.22 | 4.21E-02 | transcription_start_site | + | 305899 | 305899 | 1072  | 16413 | AN3642 |
| 934  | CONTIG61 | 349353 | 349927 | 1.79 | 1.25E-02 | transcription_start_site | - | 349121 | 349121 | -519  | 16467 | AN3658 |
| 934  | CONTIG61 | 349353 | 349927 | 1.79 | 1.25E-02 | transcription_start_site | - | 348846 | 348846 | -794  | 16468 | AN3658 |
| 934  | CONTIG61 | 349353 | 349927 | 1.79 | 1.25E-02 | transcription_start_site | + | 350195 | 350195 | -555  | 16469 | AN3659 |
| 934  | CONTIG61 | 349353 | 349927 | 1.79 | 1.25E-02 | transcription_start_site | + | 350427 | 350427 | -787  | 16470 | AN3659 |
| 934  | CONTIG61 | 349353 | 349927 | 1.79 | 1.25E-02 | transcription_start_site | + | 352381 | 352381 | -2741 | 16471 | AN3659 |
| 1335 | CONTIG61 | 369992 | 370251 | 1.41 | 4.20E-02 | transcription_start_site | - | 369613 | 369613 | -508  | 16478 | AN3664 |
| 1335 | CONTIG61 | 369992 | 370251 | 1.41 | 4.20E-02 | transcription_start_site | - | 368285 | 368285 | -1836 | 16479 | AN3664 |
| 1335 | CONTIG61 | 369992 | 370251 | 1.41 | 4.20E-02 | transcription_start_site | - | 368150 | 368150 | -1971 | 16480 | AN3664 |
| 2194 | CONTIG61 | 374567 | 375228 | 0.8  | 1.64E-01 | transcription_start_site | - | 369613 | 369613 | -5284 | 16478 | AN3664 |
| 2194 | CONTIG61 | 374567 | 375228 | 0.8  | 1.64E-01 | transcription_start_site | - | 374463 | 374463 | -434  | 16481 | AN3665 |
| 2194 | CONTIG61 | 374567 | 375228 | 0.8  | 1.64E-01 | transcription_start_site | - | 374181 | 374181 | -716  | 16482 | AN3665 |
| 2194 | CONTIG61 | 374567 | 375228 | 0.8  | 1.64E-01 | transcription_start_site | - | 372805 | 372805 | -2092 | 16483 | AN3665 |
| 2194 | CONTIG61 | 374567 | 375228 | 0.8  | 1.64E-01 | transcription_start_site | - | 372557 | 372557 | -2340 | 16484 | AN3665 |
| 2194 | CONTIG61 | 374567 | 375228 | 0.8  | 1.64E-01 | transcription_start_site | - | 372278 | 372278 | -2619 | 16485 | AN3665 |
| 1870 | CONTIG61 | 380421 | 380991 | 1.03 | 1.38E-01 | transcription_start_site | - | 376136 | 376136 | -4570 | 16486 | AN3666 |
| 1870 | CONTIG61 | 380421 | 380991 | 1.03 | 1.38E-01 | transcription_start_site | - | 376037 | 376037 | -4669 | 16487 | AN3666 |
| 2194 | CONTIG61 | 374567 | 375228 | 0.8  | 1.64E-01 | transcription_start_site | - | 375397 | 375397 | 499   | 16488 | AN3666 |
| 2194 | CONTIG61 | 374567 | 375228 | 0.8  | 1.64E-01 | transcription_start_site | - | 376037 | 376037 | 1139  | 16487 | AN3666 |
| 2194 | CONTIG61 | 374567 | 375228 | 0.8  | 1.64E-01 | transcription_start_site | - | 376136 | 376136 | 1238  | 16486 | AN3666 |
| 1250 | CONTIG61 | 381226 | 381595 | 1.48 | 1.61E-02 | transcription_start_site | - | 378571 | 378571 | -2839 | 16489 | AN3667 |

|      |          |        |        |      |          |                          |   |        |        |       |       |        |
|------|----------|--------|--------|------|----------|--------------------------|---|--------|--------|-------|-------|--------|
| 1250 | CONTIG61 | 381226 | 381595 | 1.48 | 1.61E-02 | transcription_start_site | - | 378330 | 378330 | -3080 | 16490 | AN3667 |
| 1870 | CONTIG61 | 380421 | 380991 | 1.03 | 1.38E-01 | transcription_start_site | - | 378571 | 378571 | -2135 | 16489 | AN3667 |
| 1870 | CONTIG61 | 380421 | 380991 | 1.03 | 1.38E-01 | transcription_start_site | - | 378330 | 378330 | -2376 | 16490 | AN3667 |
| 202  | CONTIG61 | 407491 | 407918 | 2.81 | 0.00E+00 | transcription_start_site | + | 408593 | 408593 | -888  | 16509 | AN3674 |
| 202  | CONTIG61 | 407491 | 407918 | 2.81 | 0.00E+00 | transcription_start_site | + | 408939 | 408939 | -1234 | 16510 | AN3674 |
| 202  | CONTIG61 | 407491 | 407918 | 2.81 | 0.00E+00 | transcription_start_site | + | 409196 | 409196 | -1491 | 16511 | AN3674 |
| 202  | CONTIG61 | 407491 | 407918 | 2.81 | 0.00E+00 | transcription_start_site | + | 409777 | 409777 | -2072 | 16512 | AN3674 |
| 347  | CONTIG61 | 411826 | 412180 | 2.54 | 2.06E-04 | transcription_start_site | + | 413385 | 413385 | -1382 | 16513 | AN3675 |
| 347  | CONTIG61 | 411826 | 412180 | 2.54 | 2.06E-04 | transcription_start_site | + | 413473 | 413473 | -1470 | 16514 | AN3675 |
| 1691 | CONTIG61 | 421518 | 422159 | 1.14 | 5.49E-02 | transcription_start_site | - | 418035 | 418035 | -3803 | 16515 | AN3677 |
| 1691 | CONTIG61 | 421518 | 422159 | 1.14 | 5.49E-02 | transcription_start_site | - | 417238 | 417238 | -4600 | 16516 | AN3677 |
| 1572 | CONTIG61 | 423531 | 424115 | 1.22 | 7.66E-02 | transcription_start_site | + | 422764 | 422764 | 1059  | 16524 | AN3679 |
| 1691 | CONTIG61 | 421518 | 422159 | 1.14 | 5.49E-02 | transcription_start_site | + | 422151 | 422151 | -312  | 16521 | AN3679 |
| 1691 | CONTIG61 | 421518 | 422159 | 1.14 | 5.49E-02 | transcription_start_site | + | 422267 | 422267 | -428  | 16522 | AN3679 |
| 1691 | CONTIG61 | 421518 | 422159 | 1.14 | 5.49E-02 | transcription_start_site | + | 422384 | 422384 | -545  | 16523 | AN3679 |
| 1691 | CONTIG61 | 421518 | 422159 | 1.14 | 5.49E-02 | transcription_start_site | + | 422764 | 422764 | -925  | 16524 | AN3679 |
| 1572 | CONTIG61 | 423531 | 424115 | 1.22 | 7.66E-02 | transcription_start_site | + | 423586 | 423586 | 237   | 16525 | AN3680 |
| 1691 | CONTIG61 | 421518 | 422159 | 1.14 | 5.49E-02 | transcription_start_site | + | 423586 | 423586 | -1747 | 16525 | AN3680 |
| 1572 | CONTIG61 | 423531 | 424115 | 1.22 | 7.66E-02 | transcription_start_site | + | 426055 | 426055 | -2232 | 16526 | AN3681 |
| 1572 | CONTIG61 | 423531 | 424115 | 1.22 | 7.66E-02 | transcription_start_site | + | 426508 | 426508 | -2685 | 16527 | AN3681 |
| 1691 | CONTIG61 | 421518 | 422159 | 1.14 | 5.49E-02 | transcription_start_site | + | 426055 | 426055 | -4216 | 16526 | AN3681 |
| 1691 | CONTIG61 | 421518 | 422159 | 1.14 | 5.49E-02 | transcription_start_site | + | 426508 | 426508 | -4669 | 16527 | AN3681 |
| 1985 | CONTIG61 | 425479 | 425903 | 0.95 | 1.15E-01 | transcription_start_site | + | 426055 | 426055 | -364  | 16526 | AN3681 |
| 1985 | CONTIG61 | 425479 | 425903 | 0.95 | 1.15E-01 | transcription_start_site | + | 426508 | 426508 | -817  | 16527 | AN3681 |
| 1008 | CONTIG61 | 450991 | 451340 | 1.71 | 1.54E-02 | transcription_start_site | - | 446291 | 446291 | -4874 | 16537 | AN3687 |
| 1008 | CONTIG61 | 450991 | 451340 | 1.71 | 1.54E-02 | transcription_start_site | - | 445997 | 445997 | -5168 | 16538 | AN3687 |
| 1008 | CONTIG61 | 450991 | 451340 | 1.71 | 1.54E-02 | transcription_start_site | + | 450194 | 450194 | 971   | 16547 | AN3688 |
| 1008 | CONTIG61 | 450991 | 451340 | 1.71 | 1.54E-02 | transcription_start_site | + | 455026 | 455026 | -3860 | 16548 | AN3689 |
| 1008 | CONTIG61 | 450991 | 451340 | 1.71 | 1.54E-02 | transcription_start_site | + | 455180 | 455180 | -4014 | 16549 | AN3689 |
| 1008 | CONTIG61 | 450991 | 451340 | 1.71 | 1.54E-02 | transcription_start_site | + | 455774 | 455774 | -4608 | 16550 | AN3689 |
| 1532 | CONTIG61 | 465157 | 465726 | 1.25 | 3.61E-02 | transcription_start_site | - | 464948 | 464948 | -493  | 16564 | AN3692 |
| 1532 | CONTIG61 | 465157 | 465726 | 1.25 | 3.61E-02 | transcription_start_site | + | 466348 | 466348 | -906  | 16565 | AN3693 |
| 1532 | CONTIG61 | 465157 | 465726 | 1.25 | 3.61E-02 | transcription_start_site | + | 466471 | 466471 | -1029 | 16566 | AN3693 |
| 1532 | CONTIG61 | 465157 | 465726 | 1.25 | 3.61E-02 | transcription_start_site | + | 466583 | 466583 | -1141 | 16567 | AN3693 |
| 1532 | CONTIG61 | 465157 | 465726 | 1.25 | 3.61E-02 | transcription_start_site | + | 466802 | 466802 | -1360 | 16568 | AN3693 |
| 1532 | CONTIG61 | 465157 | 465726 | 1.25 | 3.61E-02 | transcription_start_site | + | 468426 | 468426 | -2984 | 16569 | AN3693 |
| 472  | CONTIG61 | 491557 | 491901 | 2.35 | 1.45E-03 | transcription_start_site | + | 492093 | 492093 | -364  | 16602 | AN3703 |
| 472  | CONTIG61 | 491557 | 491901 | 2.35 | 1.45E-03 | transcription_start_site | - | 492810 | 492810 | 1081  | 16609 | AN3704 |
| 697  | CONTIG61 | 516089 | 516583 | 2.05 | 5.08E-03 | transcription_start_site | - | 515995 | 515995 | -341  | 16642 | AN3713 |
| 697  | CONTIG61 | 516089 | 516583 | 2.05 | 5.08E-03 | transcription_start_site | - | 515706 | 515706 | -630  | 16643 | AN3713 |
| 1573 | CONTIG61 | 514879 | 515378 | 1.22 | 7.66E-02 | transcription_start_site | - | 515706 | 515706 | 577   | 16643 | AN3713 |
| 1573 | CONTIG61 | 514879 | 515378 | 1.22 | 7.66E-02 | transcription_start_site | - | 515995 | 515995 | 866   | 16642 | AN3713 |
| 697  | CONTIG61 | 516089 | 516583 | 2.05 | 5.08E-03 | transcription_start_site | + | 517353 | 517353 | -1017 | 16644 | AN3714 |
| 697  | CONTIG61 | 516089 | 516583 | 2.05 | 5.08E-03 | transcription_start_site | + | 517676 | 517676 | -1340 | 16645 | AN3714 |
| 697  | CONTIG61 | 516089 | 516583 | 2.05 | 5.08E-03 | transcription_start_site | + | 518370 | 518370 | -2034 | 16646 | AN3714 |
| 697  | CONTIG61 | 516089 | 516583 | 2.05 | 5.08E-03 | transcription_start_site | + | 519118 | 519118 | -2782 | 16647 | AN3714 |
| 1573 | CONTIG61 | 514879 | 515378 | 1.22 | 7.66E-02 | transcription_start_site | + | 517353 | 517353 | -2224 | 16644 | AN3714 |
| 1573 | CONTIG61 | 514879 | 515378 | 1.22 | 7.66E-02 | transcription_start_site | + | 517676 | 517676 | -2547 | 16645 | AN3714 |
| 1573 | CONTIG61 | 514879 | 515378 | 1.22 | 7.66E-02 | transcription_start_site | + | 518370 | 518370 | -3241 | 16646 | AN3714 |
| 1573 | CONTIG61 | 514879 | 515378 | 1.22 | 7.66E-02 | transcription_start_site | + | 519118 | 519118 | -3989 | 16647 | AN3714 |
| 1694 | CONTIG61 | 543076 | 543588 | 1.14 | 9.60E-02 | transcription_start_site | - | 542860 | 542860 | -472  | 16664 | AN3722 |
| 1694 | CONTIG61 | 543076 | 543588 | 1.14 | 9.60E-02 | transcription_start_site | - | 542486 | 542486 | -846  | 16665 | AN3722 |
| 1694 | CONTIG61 | 543076 | 543588 | 1.14 | 9.60E-02 | transcription_start_site | - | 542320 | 542320 | -1012 | 16666 | AN3722 |
| 1694 | CONTIG61 | 543076 | 543588 | 1.14 | 9.60E-02 | transcription_start_site | - | 541661 | 541661 | -1671 | 16667 | AN3722 |
| 1694 | CONTIG61 | 543076 | 543588 | 1.14 | 9.60E-02 | transcription_start_site | + | 548095 | 548095 | -4763 | 16668 | AN3724 |
| 1009 | CONTIG61 | 549526 | 549810 | 1.71 | 1.54E-02 | transcription_start_site | - | 549342 | 549342 | -326  | 16669 | AN3725 |
| 1009 | CONTIG61 | 549526 | 549810 | 1.71 | 1.54E-02 | transcription_start_site | - | 549253 | 549253 | -415  | 16670 | AN3725 |

|      |          |        |        |      |          |                          |   |        |        |       |       |        |
|------|----------|--------|--------|------|----------|--------------------------|---|--------|--------|-------|-------|--------|
| 1009 | CONTIG61 | 549526 | 549810 | 1.71 | 1.54E-02 | transcription_start_site | - | 549008 | 549008 | -660  | 16671 | AN3725 |
| 1009 | CONTIG61 | 549526 | 549810 | 1.71 | 1.54E-02 | transcription_start_site | + | 550199 | 550199 | -531  | 16672 | AN3726 |
| 1009 | CONTIG61 | 549526 | 549810 | 1.71 | 1.54E-02 | transcription_start_site | + | 551156 | 551156 | -1488 | 16673 | AN3726 |
| 1009 | CONTIG61 | 549526 | 549810 | 1.71 | 1.54E-02 | transcription_start_site | + | 552000 | 552000 | -2332 | 16674 | AN3726 |
| 1009 | CONTIG61 | 549526 | 549810 | 1.71 | 1.54E-02 | transcription_start_site | + | 552241 | 552241 | -2573 | 16675 | AN3726 |
| 1009 | CONTIG61 | 549526 | 549810 | 1.71 | 1.54E-02 | transcription_start_site | + | 553712 | 553712 | -4044 | 16676 | AN3727 |
| 1009 | CONTIG61 | 549526 | 549810 | 1.71 | 1.54E-02 | transcription_start_site | + | 553938 | 553938 | -4270 | 16677 | AN3727 |
| 254  | CONTIG61 | 567152 | 567450 | 2.7  | 0.00E+00 | transcription_start_site | - | 564109 | 564109 | -3192 | 16682 | AN3729 |
| 254  | CONTIG61 | 567152 | 567450 | 2.7  | 0.00E+00 | transcription_start_site | - | 563895 | 563895 | -3406 | 16683 | AN3729 |
| 384  | CONTIG61 | 565067 | 565723 | 2.47 | 0.00E+00 | transcription_start_site | - | 564109 | 564109 | -1286 | 16682 | AN3729 |
| 384  | CONTIG61 | 565067 | 565723 | 2.47 | 0.00E+00 | transcription_start_site | - | 563895 | 563895 | -1500 | 16683 | AN3729 |
| 876  | CONTIG61 | 566177 | 566761 | 1.86 | 9.96E-03 | transcription_start_site | - | 564109 | 564109 | -2360 | 16682 | AN3729 |
| 876  | CONTIG61 | 566177 | 566761 | 1.86 | 9.96E-03 | transcription_start_site | - | 563895 | 563895 | -2574 | 16683 | AN3729 |
| 254  | CONTIG61 | 567152 | 567450 | 2.7  | 0.00E+00 | transcription_start_site | + | 568900 | 568900 | -1599 | 16685 | AN3730 |
| 254  | CONTIG61 | 567152 | 567450 | 2.7  | 0.00E+00 | transcription_start_site | + | 569048 | 569048 | -1747 | 16686 | AN3730 |
| 254  | CONTIG61 | 567152 | 567450 | 2.7  | 0.00E+00 | transcription_start_site | + | 569141 | 569141 | -1840 | 16687 | AN3730 |
| 254  | CONTIG61 | 567152 | 567450 | 2.7  | 0.00E+00 | transcription_start_site | + | 569228 | 569228 | -1927 | 16688 | AN3730 |
| 254  | CONTIG61 | 567152 | 567450 | 2.7  | 0.00E+00 | transcription_start_site | + | 570030 | 570030 | -2729 | 16689 | AN3730 |
| 384  | CONTIG61 | 565067 | 565723 | 2.47 | 0.00E+00 | transcription_start_site | + | 568900 | 568900 | -3505 | 16685 | AN3730 |
| 384  | CONTIG61 | 565067 | 565723 | 2.47 | 0.00E+00 | transcription_start_site | + | 569048 | 569048 | -3653 | 16686 | AN3730 |
| 384  | CONTIG61 | 565067 | 565723 | 2.47 | 0.00E+00 | transcription_start_site | + | 569141 | 569141 | -3746 | 16687 | AN3730 |
| 384  | CONTIG61 | 565067 | 565723 | 2.47 | 0.00E+00 | transcription_start_site | + | 569228 | 569228 | -3833 | 16688 | AN3730 |
| 384  | CONTIG61 | 565067 | 565723 | 2.47 | 0.00E+00 | transcription_start_site | + | 570030 | 570030 | -4635 | 16689 | AN3730 |
| 876  | CONTIG61 | 566177 | 566761 | 1.86 | 9.96E-03 | transcription_start_site | + | 568900 | 568900 | -2431 | 16685 | AN3730 |
| 876  | CONTIG61 | 566177 | 566761 | 1.86 | 9.96E-03 | transcription_start_site | + | 569048 | 569048 | -2579 | 16686 | AN3730 |
| 876  | CONTIG61 | 566177 | 566761 | 1.86 | 9.96E-03 | transcription_start_site | + | 569141 | 569141 | -2672 | 16687 | AN3730 |
| 876  | CONTIG61 | 566177 | 566761 | 1.86 | 9.96E-03 | transcription_start_site | + | 569228 | 569228 | -2759 | 16688 | AN3730 |
| 876  | CONTIG61 | 566177 | 566761 | 1.86 | 9.96E-03 | transcription_start_site | + | 570030 | 570030 | -3561 | 16689 | AN3730 |
| 254  | CONTIG61 | 567152 | 567450 | 2.7  | 0.00E+00 | transcription_start_site | + | 571692 | 571692 | -4391 | 16690 | AN3731 |
| 876  | CONTIG61 | 566177 | 566761 | 1.86 | 9.96E-03 | transcription_start_site | + | 571692 | 571692 | -5223 | 16690 | AN3731 |
| 1168 | CONTIG61 | 585167 | 585964 | 1.56 | 2.63E-02 | transcription_start_site | - | 583805 | 583805 | -1760 | 16699 | AN3734 |
| 1168 | CONTIG61 | 585167 | 585964 | 1.56 | 2.63E-02 | transcription_start_site | - | 583006 | 583006 | -2559 | 16700 | AN3734 |
| 1168 | CONTIG61 | 585167 | 585964 | 1.56 | 2.63E-02 | transcription_start_site | - | 582261 | 582261 | -3304 | 16701 | AN3734 |
| 1168 | CONTIG61 | 585167 | 585964 | 1.56 | 2.63E-02 | transcription_start_site | + | 586348 | 586348 | -782  | 16702 | AN3735 |
| 1168 | CONTIG61 | 585167 | 585964 | 1.56 | 2.63E-02 | transcription_start_site | + | 589217 | 589217 | -3651 | 16703 | AN3735 |
| 1992 | CONTIG61 | 597321 | 597820 | 0.95 | 1.76E-01 | transcription_start_site | - | 592393 | 592393 | -5177 | 16704 | AN3736 |
| 1992 | CONTIG61 | 597321 | 597820 | 0.95 | 1.76E-01 | transcription_start_site | - | 595814 | 595814 | -1756 | 16709 | AN3738 |
| 1992 | CONTIG61 | 597321 | 597820 | 0.95 | 1.76E-01 | transcription_start_site | - | 595248 | 595248 | -2322 | 16710 | AN3738 |
| 1992 | CONTIG61 | 597321 | 597820 | 0.95 | 1.76E-01 | transcription_start_site | + | 597983 | 597983 | -412  | 16711 | AN3739 |
| 1992 | CONTIG61 | 597321 | 597820 | 0.95 | 1.76E-01 | transcription_start_site | + | 598480 | 598480 | -909  | 16712 | AN3739 |
| 1992 | CONTIG61 | 597321 | 597820 | 0.95 | 1.76E-01 | transcription_start_site | + | 598668 | 598668 | -1097 | 16713 | AN3739 |
| 1992 | CONTIG61 | 597321 | 597820 | 0.95 | 1.76E-01 | transcription_start_site | + | 598728 | 598728 | -1157 | 16714 | AN3739 |
| 1992 | CONTIG61 | 597321 | 597820 | 0.95 | 1.76E-01 | transcription_start_site | + | 598879 | 598879 | -1308 | 16715 | AN3739 |
| 1992 | CONTIG61 | 597321 | 597820 | 0.95 | 1.76E-01 | transcription_start_site | + | 599082 | 599082 | -1511 | 16716 | AN3739 |
| 1992 | CONTIG61 | 597321 | 597820 | 0.95 | 1.76E-01 | transcription_start_site | + | 599245 | 599245 | -1674 | 16717 | AN3739 |
| 1992 | CONTIG61 | 597321 | 597820 | 0.95 | 1.76E-01 | transcription_start_site | + | 599722 | 599722 | -2151 | 16718 | AN3739 |
| 1992 | CONTIG61 | 597321 | 597820 | 0.95 | 1.76E-01 | transcription_start_site | + | 599926 | 599926 | -2355 | 16719 | AN3739 |
| 1992 | CONTIG61 | 597321 | 597820 | 0.95 | 1.76E-01 | transcription_start_site | + | 602502 | 602502 | -4931 | 16722 | AN3741 |
| 1992 | CONTIG61 | 597321 | 597820 | 0.95 | 1.76E-01 | transcription_start_site | + | 602725 | 602725 | -5154 | 16723 | AN3741 |
| 473  | CONTIG61 | 618311 | 618749 | 2.35 | 1.45E-03 | transcription_start_site | - | 616710 | 616710 | -1820 | 16734 | AN3746 |
| 473  | CONTIG61 | 618311 | 618749 | 2.35 | 1.45E-03 | transcription_start_site | - | 616133 | 616133 | -2397 | 16735 | AN3746 |
| 473  | CONTIG61 | 618311 | 618749 | 2.35 | 1.45E-03 | transcription_start_site | - | 615427 | 615427 | -3103 | 16736 | AN3746 |
| 473  | CONTIG61 | 618311 | 618749 | 2.35 | 1.45E-03 | transcription_start_site | - | 615250 | 615250 | -3280 | 16737 | AN3746 |
| 473  | CONTIG61 | 618311 | 618749 | 2.35 | 1.45E-03 | transcription_start_site | + | 619870 | 619870 | -1340 | 16738 | AN3747 |
| 473  | CONTIG61 | 618311 | 618749 | 2.35 | 1.45E-03 | transcription_start_site | + | 620037 | 620037 | -1507 | 16739 | AN3747 |
| 473  | CONTIG61 | 618311 | 618749 | 2.35 | 1.45E-03 | transcription_start_site | + | 620383 | 620383 | -1853 | 16740 | AN3747 |
| 473  | CONTIG61 | 618311 | 618749 | 2.35 | 1.45E-03 | transcription_start_site | + | 620883 | 620883 | -2353 | 16741 | AN3747 |

|      |          |        |        |      |          |                          |   |        |        |       |       |        |
|------|----------|--------|--------|------|----------|--------------------------|---|--------|--------|-------|-------|--------|
| 473  | CONTIG61 | 618311 | 618749 | 2.35 | 1.45E-03 | transcription_start_site | + | 621064 | 621064 | -2534 | 16742 | AN3747 |
| 50   | CONTIG61 | 644265 | 644776 | 3.23 | 0.00E+00 | transcription_start_site | - | 640367 | 640367 | -4153 | 16753 | AN3751 |
| 497  | CONTIG61 | 640365 | 640794 | 2.32 | 1.62E-03 | transcription_start_site | - | 640367 | 640367 | -212  | 16753 | AN3751 |
| 1574 | CONTIG61 | 645155 | 645594 | 1.22 | 7.66E-02 | transcription_start_site | - | 640367 | 640367 | -5007 | 16753 | AN3751 |
| 50   | CONTIG61 | 644265 | 644776 | 3.23 | 0.00E+00 | transcription_start_site | - | 643505 | 643505 | -1015 | 16754 | AN3752 |
| 50   | CONTIG61 | 644265 | 644776 | 3.23 | 0.00E+00 | transcription_start_site | - | 641835 | 641835 | -2685 | 16755 | AN3752 |
| 1574 | CONTIG61 | 645155 | 645594 | 1.22 | 7.66E-02 | transcription_start_site | - | 643505 | 643505 | -1869 | 16754 | AN3752 |
| 1574 | CONTIG61 | 645155 | 645594 | 1.22 | 7.66E-02 | transcription_start_site | - | 641835 | 641835 | -3539 | 16755 | AN3752 |
| 1206 | CONTIG61 | 650120 | 650548 | 1.52 | 3.01E-02 | transcription_start_site | - | 648671 | 648671 | -1663 | 16756 | AN3753 |
| 1206 | CONTIG61 | 650120 | 650548 | 1.52 | 3.01E-02 | transcription_start_site | - | 648144 | 648144 | -2190 | 16757 | AN3753 |
| 1206 | CONTIG61 | 650120 | 650548 | 1.52 | 3.01E-02 | transcription_start_site | - | 647791 | 647791 | -2543 | 16758 | AN3753 |
| 1206 | CONTIG61 | 650120 | 650548 | 1.52 | 3.01E-02 | transcription_start_site | - | 647487 | 647487 | -2847 | 16759 | AN3753 |
| 1206 | CONTIG61 | 650120 | 650548 | 1.52 | 3.01E-02 | transcription_start_site | - | 647080 | 647080 | -3254 | 16760 | AN3753 |
| 1206 | CONTIG61 | 650120 | 650548 | 1.52 | 3.01E-02 | transcription_start_site | - | 646620 | 646620 | -3714 | 16761 | AN3753 |
| 1207 | CONTIG61 | 674707 | 675066 | 1.52 | 3.01E-02 | transcription_start_site | + | 675037 | 675037 | -150  | 16782 | AN3761 |
| 635  | CONTIG61 | 681528 | 681889 | 2.13 | 4.01E-03 | transcription_start_site | + | 681182 | 681182 | 526   | 16785 | AN3762 |
| 635  | CONTIG61 | 681528 | 681889 | 2.13 | 4.01E-03 | transcription_start_site | + | 680833 | 680833 | 875   | 16784 | AN3762 |
| 635  | CONTIG61 | 681528 | 681889 | 2.13 | 4.01E-03 | transcription_start_site | + | 680716 | 680716 | 992   | 16783 | AN3762 |
| 635  | CONTIG61 | 681528 | 681889 | 2.13 | 4.01E-03 | transcription_start_site | + | 682468 | 682468 | -759  | 16786 | AN3763 |
| 635  | CONTIG61 | 681528 | 681889 | 2.13 | 4.01E-03 | transcription_start_site | + | 682781 | 682781 | -1072 | 16787 | AN3763 |
| 635  | CONTIG61 | 681528 | 681889 | 2.13 | 4.01E-03 | transcription_start_site | + | 683441 | 683441 | -1732 | 16788 | AN3763 |
| 635  | CONTIG61 | 681528 | 681889 | 2.13 | 4.01E-03 | transcription_start_site | + | 685327 | 685327 | -3618 | 16789 | AN3764 |
| 635  | CONTIG61 | 681528 | 681889 | 2.13 | 4.01E-03 | transcription_start_site | + | 685458 | 685458 | -3749 | 16790 | AN3764 |
| 635  | CONTIG61 | 681528 | 681889 | 2.13 | 4.01E-03 | transcription_start_site | + | 686301 | 686301 | -4592 | 16791 | AN3764 |
| 635  | CONTIG61 | 681528 | 681889 | 2.13 | 4.01E-03 | transcription_start_site | + | 686581 | 686581 | -4872 | 16792 | AN3764 |
| 366  | CONTIG61 | 694202 | 694626 | 2.51 | 3.81E-04 | transcription_start_site | - | 692136 | 692136 | -2278 | 16794 | AN3765 |
| 366  | CONTIG61 | 694202 | 694626 | 2.51 | 3.81E-04 | transcription_start_site | - | 691491 | 691491 | -2923 | 16795 | AN3765 |
| 1169 | CONTIG61 | 718502 | 718791 | 1.56 | 2.63E-02 | transcription_start_site | - | 717187 | 717187 | -1459 | 16805 | AN3770 |
| 2060 | CONTIG61 | 721954 | 722453 | 0.91 | 1.97E-01 | transcription_start_site | - | 717187 | 717187 | -5016 | 16805 | AN3770 |
| 1169 | CONTIG61 | 718502 | 718791 | 1.56 | 2.63E-02 | transcription_start_site | + | 717903 | 717903 | 743   | 16809 | AN3771 |
| 1169 | CONTIG61 | 718502 | 718791 | 1.56 | 2.63E-02 | transcription_start_site | + | 717721 | 717721 | 925   | 16808 | AN3771 |
| 1169 | CONTIG61 | 718502 | 718791 | 1.56 | 2.63E-02 | transcription_start_site | + | 717564 | 717564 | 1082  | 16807 | AN3771 |
| 698  | CONTIG61 | 725784 | 726128 | 2.05 | 5.08E-03 | transcription_start_site | - | 723021 | 723021 | -2935 | 16810 | AN3773 |
| 698  | CONTIG61 | 725784 | 726128 | 2.05 | 5.08E-03 | transcription_start_site | - | 722329 | 722329 | -3627 | 16811 | AN3773 |
| 2060 | CONTIG61 | 721954 | 722453 | 0.91 | 1.97E-01 | transcription_start_site | - | 722329 | 722329 | 125   | 16811 | AN3773 |
| 2060 | CONTIG61 | 721954 | 722453 | 0.91 | 1.97E-01 | transcription_start_site | - | 723021 | 723021 | 817   | 16810 | AN3773 |
| 1333 | CONTIG61 | 732169 | 732653 | 1.41 | 2.07E-02 | transcription_start_site | - | 727912 | 727912 | -4499 | 16812 | AN3774 |
| 1333 | CONTIG61 | 732169 | 732653 | 1.41 | 2.07E-02 | transcription_start_site | - | 727765 | 727765 | -4646 | 16813 | AN3774 |
| 1333 | CONTIG61 | 732169 | 732653 | 1.41 | 2.07E-02 | transcription_start_site | - | 727490 | 727490 | -4921 | 16814 | AN3774 |
| 698  | CONTIG61 | 725784 | 726128 | 2.05 | 5.08E-03 | transcription_start_site | + | 729127 | 729127 | -3171 | 16815 | AN3775 |
| 698  | CONTIG61 | 725784 | 726128 | 2.05 | 5.08E-03 | transcription_start_site | + | 729693 | 729693 | -3737 | 16816 | AN3775 |
| 1333 | CONTIG61 | 732169 | 732653 | 1.41 | 2.07E-02 | transcription_start_site | - | 732172 | 732172 | -239  | 16817 | AN3776 |
| 1333 | CONTIG61 | 732169 | 732653 | 1.41 | 2.07E-02 | transcription_start_site | - | 731450 | 731450 | -961  | 16818 | AN3776 |
| 1333 | CONTIG61 | 732169 | 732653 | 1.41 | 2.07E-02 | transcription_start_site | + | 734492 | 734492 | -2081 | 16819 | AN3777 |
| 1333 | CONTIG61 | 732169 | 732653 | 1.41 | 2.07E-02 | transcription_start_site | + | 735103 | 735103 | -2692 | 16820 | AN3777 |
| 1333 | CONTIG61 | 732169 | 732653 | 1.41 | 2.07E-02 | transcription_start_site | + | 735359 | 735359 | -2948 | 16821 | AN3777 |
| 1333 | CONTIG61 | 732169 | 732653 | 1.41 | 2.07E-02 | transcription_start_site | + | 735819 | 735819 | -3408 | 16822 | AN3777 |
| 348  | CONTIG61 | 750532 | 750829 | 2.54 | 2.06E-04 | transcription_start_site | - | 746289 | 746289 | -4391 | 16829 | AN3781 |
| 348  | CONTIG61 | 750532 | 750829 | 2.54 | 2.06E-04 | transcription_start_site | - | 746052 | 746052 | -4628 | 16830 | AN3781 |
| 775  | CONTIG61 | 749557 | 749826 | 1.97 | 7.08E-03 | transcription_start_site | - | 746289 | 746289 | -3402 | 16829 | AN3781 |
| 775  | CONTIG61 | 749557 | 749826 | 1.97 | 7.08E-03 | transcription_start_site | - | 746052 | 746052 | -3639 | 16830 | AN3781 |
| 1111 | CONTIG61 | 746792 | 747066 | 1.6  | 2.29E-02 | transcription_start_site | - | 746289 | 746289 | -640  | 16829 | AN3781 |
| 1111 | CONTIG61 | 746792 | 747066 | 1.6  | 2.29E-02 | transcription_start_site | - | 746052 | 746052 | -877  | 16830 | AN3781 |
| 1111 | CONTIG61 | 746792 | 747066 | 1.6  | 2.29E-02 | transcription_start_site | - | 744508 | 744508 | -2421 | 16831 | AN3781 |
| 2061 | CONTIG61 | 746117 | 746691 | 0.91 | 1.97E-01 | transcription_start_site | - | 746289 | 746289 | -115  | 16829 | AN3781 |
| 2061 | CONTIG61 | 746117 | 746691 | 0.91 | 1.97E-01 | transcription_start_site | - | 746052 | 746052 | -352  | 16830 | AN3781 |
| 2061 | CONTIG61 | 746117 | 746691 | 0.91 | 1.97E-01 | transcription_start_site | - | 744508 | 744508 | -1896 | 16831 | AN3781 |

|      |          |        |        |      |          |                          |   |        |        |       |       |        |
|------|----------|--------|--------|------|----------|--------------------------|---|--------|--------|-------|-------|--------|
| 348  | CONTIG61 | 750532 | 750829 | 2.54 | 2.06E-04 | transcription_start_site | - | 749332 | 749332 | -1348 | 16832 | AN3782 |
| 775  | CONTIG61 | 749557 | 749826 | 1.97 | 7.08E-03 | transcription_start_site | - | 749332 | 749332 | -359  | 16832 | AN3782 |
| 348  | CONTIG61 | 750532 | 750829 | 2.54 | 2.06E-04 | transcription_start_site | - | 750396 | 750396 | -284  | 16833 | AN3783 |
| 348  | CONTIG61 | 750532 | 750829 | 2.54 | 2.06E-04 | transcription_start_site | - | 750292 | 750292 | -388  | 16834 | AN3783 |
| 775  | CONTIG61 | 749557 | 749826 | 1.97 | 7.08E-03 | transcription_start_site | - | 750292 | 750292 | 600   | 16834 | AN3783 |
| 775  | CONTIG61 | 749557 | 749826 | 1.97 | 7.08E-03 | transcription_start_site | - | 750396 | 750396 | 704   | 16833 | AN3783 |
| 348  | CONTIG61 | 750532 | 750829 | 2.54 | 2.06E-04 | transcription_start_site | + | 752439 | 752439 | -1758 | 16835 | AN3784 |
| 348  | CONTIG61 | 750532 | 750829 | 2.54 | 2.06E-04 | transcription_start_site | + | 752603 | 752603 | -1922 | 16836 | AN3784 |
| 348  | CONTIG61 | 750532 | 750829 | 2.54 | 2.06E-04 | transcription_start_site | + | 752802 | 752802 | -2121 | 16837 | AN3784 |
| 348  | CONTIG61 | 750532 | 750829 | 2.54 | 2.06E-04 | transcription_start_site | + | 753231 | 753231 | -2550 | 16838 | AN3784 |
| 775  | CONTIG61 | 749557 | 749826 | 1.97 | 7.08E-03 | transcription_start_site | + | 752439 | 752439 | -2747 | 16835 | AN3784 |
| 775  | CONTIG61 | 749557 | 749826 | 1.97 | 7.08E-03 | transcription_start_site | + | 752603 | 752603 | -2911 | 16836 | AN3784 |
| 775  | CONTIG61 | 749557 | 749826 | 1.97 | 7.08E-03 | transcription_start_site | + | 752802 | 752802 | -3110 | 16837 | AN3784 |
| 775  | CONTIG61 | 749557 | 749826 | 1.97 | 7.08E-03 | transcription_start_site | + | 753231 | 753231 | -3539 | 16838 | AN3784 |
| 768  | CONTIG61 | 757887 | 758676 | 1.97 | 0.00E+00 | transcription_start_site | - | 756366 | 756366 | -1915 | 16839 | AN3785 |
| 768  | CONTIG61 | 757887 | 758676 | 1.97 | 0.00E+00 | transcription_start_site | - | 756201 | 756201 | -2080 | 16840 | AN3785 |
| 768  | CONTIG61 | 757887 | 758676 | 1.97 | 0.00E+00 | transcription_start_site | - | 756119 | 756119 | -2162 | 16841 | AN3785 |
| 768  | CONTIG61 | 757887 | 758676 | 1.97 | 0.00E+00 | transcription_start_site | - | 755962 | 755962 | -2319 | 16842 | AN3785 |
| 768  | CONTIG61 | 757887 | 758676 | 1.97 | 0.00E+00 | transcription_start_site | - | 755667 | 755667 | -2614 | 16843 | AN3785 |
| 768  | CONTIG61 | 757887 | 758676 | 1.97 | 0.00E+00 | transcription_start_site | - | 754604 | 754604 | -3677 | 16844 | AN3785 |
| 1471 | CONTIG61 | 758717 | 760336 | 1.29 | 2.02E-02 | transcription_start_site | - | 756366 | 756366 | -3160 | 16839 | AN3785 |
| 1471 | CONTIG61 | 758717 | 760336 | 1.29 | 2.02E-02 | transcription_start_site | - | 756201 | 756201 | -3325 | 16840 | AN3785 |
| 1471 | CONTIG61 | 758717 | 760336 | 1.29 | 2.02E-02 | transcription_start_site | - | 756119 | 756119 | -3407 | 16841 | AN3785 |
| 1471 | CONTIG61 | 758717 | 760336 | 1.29 | 2.02E-02 | transcription_start_site | - | 755962 | 755962 | -3564 | 16842 | AN3785 |
| 1471 | CONTIG61 | 758717 | 760336 | 1.29 | 2.02E-02 | transcription_start_site | - | 755667 | 755667 | -3859 | 16843 | AN3785 |
| 1471 | CONTIG61 | 758717 | 760336 | 1.29 | 2.02E-02 | transcription_start_site | - | 754604 | 754604 | -4922 | 16844 | AN3785 |
| 2062 | CONTIG61 | 756467 | 757108 | 0.91 | 1.97E-01 | transcription_start_site | - | 756366 | 756366 | -421  | 16839 | AN3785 |
| 2062 | CONTIG61 | 756467 | 757108 | 0.91 | 1.97E-01 | transcription_start_site | - | 756201 | 756201 | -586  | 16840 | AN3785 |
| 2062 | CONTIG61 | 756467 | 757108 | 0.91 | 1.97E-01 | transcription_start_site | - | 756119 | 756119 | -668  | 16841 | AN3785 |
| 2062 | CONTIG61 | 756467 | 757108 | 0.91 | 1.97E-01 | transcription_start_site | - | 755962 | 755962 | -825  | 16842 | AN3785 |
| 2062 | CONTIG61 | 756467 | 757108 | 0.91 | 1.97E-01 | transcription_start_site | - | 755667 | 755667 | -1120 | 16843 | AN3785 |
| 2062 | CONTIG61 | 756467 | 757108 | 0.91 | 1.97E-01 | transcription_start_site | - | 754604 | 754604 | -2183 | 16844 | AN3785 |
| 768  | CONTIG61 | 757887 | 758676 | 1.97 | 0.00E+00 | transcription_start_site | - | 759369 | 759369 | 1087  | 16849 | AN3786 |
| 768  | CONTIG61 | 757887 | 758676 | 1.97 | 0.00E+00 | transcription_start_site | - | 759561 | 759561 | 1279  | 16848 | AN3786 |
| 768  | CONTIG61 | 757887 | 758676 | 1.97 | 0.00E+00 | transcription_start_site | - | 759626 | 759626 | 1344  | 16847 | AN3786 |
| 1471 | CONTIG61 | 758717 | 760336 | 1.29 | 2.02E-02 | transcription_start_site | - | 759561 | 759561 | 34    | 16848 | AN3786 |
| 1471 | CONTIG61 | 758717 | 760336 | 1.29 | 2.02E-02 | transcription_start_site | - | 759626 | 759626 | 99    | 16847 | AN3786 |
| 1471 | CONTIG61 | 758717 | 760336 | 1.29 | 2.02E-02 | transcription_start_site | - | 759369 | 759369 | -157  | 16849 | AN3786 |
| 1471 | CONTIG61 | 758717 | 760336 | 1.29 | 2.02E-02 | transcription_start_site | - | 759842 | 759842 | 315   | 16846 | AN3786 |
| 1471 | CONTIG61 | 758717 | 760336 | 1.29 | 2.02E-02 | transcription_start_site | - | 760021 | 760021 | 494   | 16845 | AN3786 |
| 1819 | CONTIG61 | 762541 | 763040 | 1.06 | 1.22E-01 | transcription_start_site | - | 760021 | 760021 | -2769 | 16845 | AN3786 |
| 1819 | CONTIG61 | 762541 | 763040 | 1.06 | 1.22E-01 | transcription_start_site | - | 759842 | 759842 | -2948 | 16846 | AN3786 |
| 1819 | CONTIG61 | 762541 | 763040 | 1.06 | 1.22E-01 | transcription_start_site | - | 759626 | 759626 | -3164 | 16847 | AN3786 |
| 1819 | CONTIG61 | 762541 | 763040 | 1.06 | 1.22E-01 | transcription_start_site | - | 759561 | 759561 | -3229 | 16848 | AN3786 |
| 1819 | CONTIG61 | 762541 | 763040 | 1.06 | 1.22E-01 | transcription_start_site | - | 759369 | 759369 | -3421 | 16849 | AN3786 |
| 768  | CONTIG61 | 757887 | 758676 | 1.97 | 0.00E+00 | transcription_start_site | + | 760528 | 760528 | -2246 | 16850 | AN3787 |
| 768  | CONTIG61 | 757887 | 758676 | 1.97 | 0.00E+00 | transcription_start_site | + | 761108 | 761108 | -2826 | 16851 | AN3787 |
| 768  | CONTIG61 | 757887 | 758676 | 1.97 | 0.00E+00 | transcription_start_site | + | 761560 | 761560 | -3278 | 16852 | AN3787 |
| 1471 | CONTIG61 | 758717 | 760336 | 1.29 | 2.02E-02 | transcription_start_site | + | 760528 | 760528 | -1001 | 16850 | AN3787 |
| 1471 | CONTIG61 | 758717 | 760336 | 1.29 | 2.02E-02 | transcription_start_site | + | 761108 | 761108 | -1581 | 16851 | AN3787 |
| 1471 | CONTIG61 | 758717 | 760336 | 1.29 | 2.02E-02 | transcription_start_site | + | 761560 | 761560 | -2033 | 16852 | AN3787 |
| 1819 | CONTIG61 | 762541 | 763040 | 1.06 | 1.22E-01 | transcription_start_site | + | 761560 | 761560 | 1230  | 16852 | AN3787 |
| 2062 | CONTIG61 | 756467 | 757108 | 0.91 | 1.97E-01 | transcription_start_site | + | 760528 | 760528 | -3740 | 16850 | AN3787 |
| 2062 | CONTIG61 | 756467 | 757108 | 0.91 | 1.97E-01 | transcription_start_site | + | 761108 | 761108 | -4320 | 16851 | AN3787 |
| 2062 | CONTIG61 | 756467 | 757108 | 0.91 | 1.97E-01 | transcription_start_site | + | 761560 | 761560 | -4772 | 16852 | AN3787 |
| 1471 | CONTIG61 | 758717 | 760336 | 1.29 | 2.02E-02 | transcription_start_site | + | 765336 | 765336 | -5809 | 16855 | AN3789 |
| 1819 | CONTIG61 | 762541 | 763040 | 1.06 | 1.22E-01 | transcription_start_site | + | 765336 | 765336 | -2545 | 16855 | AN3789 |



|      |          |        |        |      |          |                          |   |        |        |       |       |        |
|------|----------|--------|--------|------|----------|--------------------------|---|--------|--------|-------|-------|--------|
| 1819 | CONTIG61 | 762541 | 763040 | 1.06 | 1.22E-01 | transcription_start_site | + | 765547 | 765547 | -2756 | 16856 | AN3789 |
| 1819 | CONTIG61 | 762541 | 763040 | 1.06 | 1.22E-01 | transcription_start_site | + | 765665 | 765665 | -2874 | 16857 | AN3789 |
| 877  | CONTIG61 | 775446 | 776000 | 1.86 | 9.96E-03 | transcription_start_site | + | 776620 | 776620 | -897  | 16866 | AN3793 |
| 877  | CONTIG61 | 775446 | 776000 | 1.86 | 9.96E-03 | transcription_start_site | + | 778023 | 778023 | -2300 | 16867 | AN3793 |
| 877  | CONTIG61 | 775446 | 776000 | 1.86 | 9.96E-03 | transcription_start_site | + | 778316 | 778316 | -2593 | 16868 | AN3793 |
| 1756 | CONTIG61 | 778296 | 778652 | 1.1  | 1.08E-01 | transcription_start_site | + | 778316 | 778316 | 158   | 16868 | AN3793 |
| 1756 | CONTIG61 | 778296 | 778652 | 1.1  | 1.08E-01 | transcription_start_site | + | 778023 | 778023 | 451   | 16867 | AN3793 |
| 1112 | CONTIG61 | 785411 | 785690 | 1.6  | 2.29E-02 | transcription_start_site | - | 782738 | 782738 | -2812 | 16869 | AN3794 |
| 1112 | CONTIG61 | 785411 | 785690 | 1.6  | 2.29E-02 | transcription_start_site | - | 781635 | 781635 | -3915 | 16870 | AN3794 |
| 1112 | CONTIG61 | 785411 | 785690 | 1.6  | 2.29E-02 | transcription_start_site | - | 781337 | 781337 | -4213 | 16871 | AN3794 |
| 2118 | CONTIG61 | 789306 | 790270 | 0.87 | 1.57E-01 | transcription_start_site | + | 792215 | 792215 | -2427 | 16872 | AN3795 |
| 2118 | CONTIG61 | 789306 | 790270 | 0.87 | 1.57E-01 | transcription_start_site | + | 792480 | 792480 | -2692 | 16873 | AN3795 |
| 2055 | CONTIG61 | 795386 | 796103 | 0.91 | 1.34E-01 | transcription_start_site | - | 795868 | 795868 | 123   | 16875 | AN3796 |
| 2055 | CONTIG61 | 795386 | 796103 | 0.91 | 1.34E-01 | transcription_start_site | - | 796035 | 796035 | 290   | 16874 | AN3796 |
| 226  | CONTIG61 | 812564 | 812913 | 2.77 | 0.00E+00 | transcription_start_site | - | 809767 | 809767 | -2971 | 16886 | AN3801 |
| 226  | CONTIG61 | 812564 | 812913 | 2.77 | 0.00E+00 | transcription_start_site | - | 809393 | 809393 | -3345 | 16887 | AN3801 |
| 226  | CONTIG61 | 812564 | 812913 | 2.77 | 0.00E+00 | transcription_start_site | - | 809164 | 809164 | -3574 | 16888 | AN3801 |
| 226  | CONTIG61 | 812564 | 812913 | 2.77 | 0.00E+00 | transcription_start_site | - | 809003 | 809003 | -3735 | 16889 | AN3801 |
| 226  | CONTIG61 | 812564 | 812913 | 2.77 | 0.00E+00 | transcription_start_site | - | 808616 | 808616 | -4122 | 16890 | AN3801 |
| 226  | CONTIG61 | 812564 | 812913 | 2.77 | 0.00E+00 | transcription_start_site | - | 808493 | 808493 | -4245 | 16891 | AN3801 |
| 226  | CONTIG61 | 812564 | 812913 | 2.77 | 0.00E+00 | transcription_start_site | - | 808323 | 808323 | -4415 | 16892 | AN3801 |
| 226  | CONTIG61 | 812564 | 812913 | 2.77 | 0.00E+00 | transcription_start_site | - | 808081 | 808081 | -4657 | 16893 | AN3801 |
| 226  | CONTIG61 | 812564 | 812913 | 2.77 | 0.00E+00 | transcription_start_site | - | 807852 | 807852 | -4886 | 16894 | AN3801 |
| 226  | CONTIG61 | 812564 | 812913 | 2.77 | 0.00E+00 | transcription_start_site | - | 807699 | 807699 | -5039 | 16895 | AN3801 |
| 226  | CONTIG61 | 812564 | 812913 | 2.77 | 0.00E+00 | transcription_start_site | - | 807624 | 807624 | -5114 | 16896 | AN3801 |
| 1993 | CONTIG61 | 809944 | 810203 | 0.95 | 1.76E-01 | transcription_start_site | - | 809767 | 809767 | -306  | 16886 | AN3801 |
| 1993 | CONTIG61 | 809944 | 810203 | 0.95 | 1.76E-01 | transcription_start_site | - | 809393 | 809393 | -680  | 16887 | AN3801 |
| 1993 | CONTIG61 | 809944 | 810203 | 0.95 | 1.76E-01 | transcription_start_site | - | 809164 | 809164 | -909  | 16888 | AN3801 |
| 1993 | CONTIG61 | 809944 | 810203 | 0.95 | 1.76E-01 | transcription_start_site | - | 809003 | 809003 | -1070 | 16889 | AN3801 |
| 1993 | CONTIG61 | 809944 | 810203 | 0.95 | 1.76E-01 | transcription_start_site | - | 808616 | 808616 | -1457 | 16890 | AN3801 |
| 1993 | CONTIG61 | 809944 | 810203 | 0.95 | 1.76E-01 | transcription_start_site | - | 808493 | 808493 | -1580 | 16891 | AN3801 |
| 1993 | CONTIG61 | 809944 | 810203 | 0.95 | 1.76E-01 | transcription_start_site | - | 808323 | 808323 | -1750 | 16892 | AN3801 |
| 1993 | CONTIG61 | 809944 | 810203 | 0.95 | 1.76E-01 | transcription_start_site | - | 808081 | 808081 | -1992 | 16893 | AN3801 |
| 1993 | CONTIG61 | 809944 | 810203 | 0.95 | 1.76E-01 | transcription_start_site | - | 807852 | 807852 | -2221 | 16894 | AN3801 |
| 1993 | CONTIG61 | 809944 | 810203 | 0.95 | 1.76E-01 | transcription_start_site | - | 807699 | 807699 | -2374 | 16895 | AN3801 |
| 1993 | CONTIG61 | 809944 | 810203 | 0.95 | 1.76E-01 | transcription_start_site | - | 807624 | 807624 | -2449 | 16896 | AN3801 |
| 1993 | CONTIG61 | 809944 | 810203 | 0.95 | 1.76E-01 | transcription_start_site | - | 807502 | 807502 | -2571 | 16897 | AN3801 |
| 1993 | CONTIG61 | 809944 | 810203 | 0.95 | 1.76E-01 | transcription_start_site | - | 807347 | 807347 | -2726 | 16898 | AN3801 |
| 1993 | CONTIG61 | 809944 | 810203 | 0.95 | 1.76E-01 | transcription_start_site | - | 807161 | 807161 | -2912 | 16899 | AN3801 |
| 1993 | CONTIG61 | 809944 | 810203 | 0.95 | 1.76E-01 | transcription_start_site | - | 807100 | 807100 | -2973 | 16900 | AN3801 |
| 1993 | CONTIG61 | 809944 | 810203 | 0.95 | 1.76E-01 | transcription_start_site | - | 806929 | 806929 | -3144 | 16901 | AN3801 |
| 1993 | CONTIG61 | 809944 | 810203 | 0.95 | 1.76E-01 | transcription_start_site | - | 806850 | 806850 | -3223 | 16902 | AN3801 |
| 1993 | CONTIG61 | 809944 | 810203 | 0.95 | 1.76E-01 | transcription_start_site | - | 806685 | 806685 | -3388 | 16903 | AN3801 |
| 1993 | CONTIG61 | 809944 | 810203 | 0.95 | 1.76E-01 | transcription_start_site | - | 806578 | 806578 | -3495 | 16904 | AN3801 |
| 1993 | CONTIG61 | 809944 | 810203 | 0.95 | 1.76E-01 | transcription_start_site | + | 810101 | 810101 | -27   | 16905 | AN3802 |
| 1993 | CONTIG61 | 809944 | 810203 | 0.95 | 1.76E-01 | transcription_start_site | + | 810380 | 810380 | -306  | 16906 | AN3802 |
| 240  | CONTIG61 | 816529 | 817718 | 2.73 | 0.00E+00 | transcription_start_site | + | 818986 | 818986 | -1862 | 16907 | AN3803 |
| 240  | CONTIG61 | 816529 | 817718 | 2.73 | 0.00E+00 | transcription_start_site | + | 819215 | 819215 | -2091 | 16908 | AN3803 |
| 240  | CONTIG61 | 816529 | 817718 | 2.73 | 0.00E+00 | transcription_start_site | + | 819417 | 819417 | -2293 | 16909 | AN3803 |
| 1203 | CONTIG61 | 815029 | 815912 | 1.52 | 1.44E-02 | transcription_start_site | + | 818986 | 818986 | -3515 | 16907 | AN3803 |
| 1203 | CONTIG61 | 815029 | 815912 | 1.52 | 1.44E-02 | transcription_start_site | + | 819215 | 819215 | -3744 | 16908 | AN3803 |
| 1203 | CONTIG61 | 815029 | 815912 | 1.52 | 1.44E-02 | transcription_start_site | + | 819417 | 819417 | -3946 | 16909 | AN3803 |
| 23   | CONTIG61 | 824419 | 824834 | 3.42 | 0.00E+00 | transcription_start_site | - | 822828 | 822828 | -1798 | 16910 | AN3804 |
| 23   | CONTIG61 | 824419 | 824834 | 3.42 | 0.00E+00 | transcription_start_site | + | 826512 | 826512 | -1885 | 16912 | AN3806 |
| 1994 | CONTIG61 | 838804 | 839243 | 0.95 | 1.76E-01 | transcription_start_site | - | 838171 | 838171 | -852  | 16927 | AN3811 |
| 1994 | CONTIG61 | 838804 | 839243 | 0.95 | 1.76E-01 | transcription_start_site | - | 838010 | 838010 | -1013 | 16928 | AN3811 |
| 1994 | CONTIG61 | 838804 | 839243 | 0.95 | 1.76E-01 | transcription_start_site | + | 838932 | 838932 | 91    | 16930 | AN3812 |

|               |        |        |      |          |                          |   |        |        |       |              |
|---------------|--------|--------|------|----------|--------------------------|---|--------|--------|-------|--------------|
| 1994 CONTIG61 | 838804 | 839243 | 0.95 | 1.76E-01 | transcription_start_site | + | 838567 | 838567 | 456   | 16929 AN3812 |
| 1994 CONTIG61 | 838804 | 839243 | 0.95 | 1.76E-01 | transcription_start_site | + | 840297 | 840297 | -1273 | 16931 AN3813 |
| 1994 CONTIG61 | 838804 | 839243 | 0.95 | 1.76E-01 | transcription_start_site | + | 840417 | 840417 | -1393 | 16932 AN3813 |
| 1994 CONTIG61 | 838804 | 839243 | 0.95 | 1.76E-01 | transcription_start_site | + | 840511 | 840511 | -1487 | 16933 AN3813 |
| 1994 CONTIG61 | 838804 | 839243 | 0.95 | 1.76E-01 | transcription_start_site | + | 841163 | 841163 | -2139 | 16934 AN3813 |
| 1754 CONTIG61 | 847514 | 847853 | 1.1  | 6.50E-02 | transcription_start_site | - | 842778 | 842778 | -4905 | 16935 AN3814 |
| 1754 CONTIG61 | 847514 | 847853 | 1.1  | 6.50E-02 | transcription_start_site | - | 846620 | 846620 | -1063 | 16939 AN3815 |
| 1754 CONTIG61 | 847514 | 847853 | 1.1  | 6.50E-02 | transcription_start_site | - | 845336 | 845336 | -2347 | 16940 AN3815 |
| 1754 CONTIG61 | 847514 | 847853 | 1.1  | 6.50E-02 | transcription_start_site | - | 844185 | 844185 | -3498 | 16941 AN3815 |
| 1754 CONTIG61 | 847514 | 847853 | 1.1  | 6.50E-02 | transcription_start_site | + | 847758 | 847758 | -74   | 16942 AN3816 |
| 736 CONTIG61  | 852684 | 853028 | 2.01 | 6.24E-03 | transcription_start_site | - | 851966 | 851966 | -890  | 16943 AN3817 |
| 736 CONTIG61  | 852684 | 853028 | 2.01 | 6.24E-03 | transcription_start_site | - | 851566 | 851566 | -1290 | 16944 AN3817 |
| 736 CONTIG61  | 852684 | 853028 | 2.01 | 6.24E-03 | transcription_start_site | - | 851150 | 851150 | -1706 | 16945 AN3817 |
| 736 CONTIG61  | 852684 | 853028 | 2.01 | 6.24E-03 | transcription_start_site | - | 848789 | 848789 | -4067 | 16946 AN3817 |
| 1754 CONTIG61 | 847514 | 847853 | 1.1  | 6.50E-02 | transcription_start_site | - | 848789 | 848789 | 1105  | 16946 AN3817 |
| 736 CONTIG61  | 852684 | 853028 | 2.01 | 6.24E-03 | transcription_start_site | + | 855771 | 855771 | -2915 | 16947 AN3818 |
| 1938 CONTIG62 | 3526   | 4330   | 0.98 | 4.20E-02 | transcription_start_site | + | 3106   | 3106   | 822   | 16960 AN3822 |
| 1938 CONTIG62 | 3526   | 4330   | 0.98 | 4.20E-02 | transcription_start_site | + | 2701   | 2701   | 1227  | 16959 AN3822 |
| 1938 CONTIG62 | 3526   | 4330   | 0.98 | 4.20E-02 | transcription_start_site | + | 3962   | 3962   | -34   | 16961 AN3823 |
| 1938 CONTIG62 | 3526   | 4330   | 0.98 | 4.20E-02 | transcription_start_site | + | 4255   | 4255   | -327  | 16962 AN3823 |
| 1938 CONTIG62 | 3526   | 4330   | 0.98 | 4.20E-02 | transcription_start_site | - | 5301   | 5301   | 1373  | 16964 AN3824 |
| 2324 CONTIG62 | 23938  | 24357  | 0.63 | 1.97E-01 | transcription_start_site | - | 23774  | 23774  | -373  | 16980 AN3830 |
| 2324 CONTIG62 | 23938  | 24357  | 0.63 | 1.97E-01 | transcription_start_site | - | 23528  | 23528  | -619  | 16981 AN3830 |
| 2324 CONTIG62 | 23938  | 24357  | 0.63 | 1.97E-01 | transcription_start_site | - | 23250  | 23250  | -897  | 16982 AN3830 |
| 2324 CONTIG62 | 23938  | 24357  | 0.63 | 1.97E-01 | transcription_start_site | + | 24328  | 24328  | -180  | 16983 AN3831 |
| 2324 CONTIG62 | 23938  | 24357  | 0.63 | 1.97E-01 | transcription_start_site | + | 24438  | 24438  | -290  | 16984 AN3831 |
| 2324 CONTIG62 | 23938  | 24357  | 0.63 | 1.97E-01 | transcription_start_site | + | 24557  | 24557  | -409  | 16985 AN3831 |
| 2324 CONTIG62 | 23938  | 24357  | 0.63 | 1.97E-01 | transcription_start_site | + | 26279  | 26279  | -2131 | 16986 AN3832 |
| 2324 CONTIG62 | 23938  | 24357  | 0.63 | 1.97E-01 | transcription_start_site | + | 26552  | 26552  | -2404 | 16987 AN3832 |
| 2324 CONTIG62 | 23938  | 24357  | 0.63 | 1.97E-01 | transcription_start_site | + | 26722  | 26722  | -2574 | 16988 AN3832 |
| 2324 CONTIG62 | 23938  | 24357  | 0.63 | 1.97E-01 | transcription_start_site | + | 28808  | 28808  | -4660 | 16989 AN3832 |
| 1452 CONTIG62 | 35931  | 36673  | 1.3  | 9.96E-03 | transcription_start_site | + | 36671  | 36671  | -369  | 16998 AN3835 |
| 1452 CONTIG62 | 35931  | 36673  | 1.3  | 9.96E-03 | transcription_start_site | + | 36825  | 36825  | -523  | 16999 AN3835 |
| 1452 CONTIG62 | 35931  | 36673  | 1.3  | 9.96E-03 | transcription_start_site | + | 36965  | 36965  | -663  | 17000 AN3835 |
| 1452 CONTIG62 | 35931  | 36673  | 1.3  | 9.96E-03 | transcription_start_site | + | 37938  | 37938  | -1636 | 17001 AN3835 |
| 1452 CONTIG62 | 35931  | 36673  | 1.3  | 9.96E-03 | transcription_start_site | + | 38687  | 38687  | -2385 | 17002 AN3835 |
| 2267 CONTIG62 | 40588  | 40942  | 0.71 | 1.38E-01 | transcription_start_site | - | 40525  | 40525  | -240  | 17003 AN3836 |
| 1452 CONTIG62 | 35931  | 36673  | 1.3  | 9.96E-03 | transcription_start_site | + | 40913  | 40913  | -4611 | 17004 AN3837 |
| 2267 CONTIG62 | 40588  | 40942  | 0.71 | 1.38E-01 | transcription_start_site | + | 40913  | 40913  | -148  | 17004 AN3837 |
| 2267 CONTIG62 | 40588  | 40942  | 0.71 | 1.38E-01 | transcription_start_site | + | 42499  | 42499  | -1734 | 17005 AN3837 |
| 2344 CONTIG62 | 54751  | 55257  | 0.58 | 1.81E-01 | transcription_start_site | - | 49860  | 49860  | -5144 | 17013 AN3840 |
| 2344 CONTIG62 | 54751  | 55257  | 0.58 | 1.81E-01 | transcription_start_site | - | 49789  | 49789  | -5215 | 17014 AN3840 |
| 2344 CONTIG62 | 54751  | 55257  | 0.58 | 1.81E-01 | transcription_start_site | - | 52629  | 52629  | -2375 | 17016 AN3841 |
| 2344 CONTIG62 | 54751  | 55257  | 0.58 | 1.81E-01 | transcription_start_site | - | 52354  | 52354  | -2650 | 17017 AN3841 |
| 2344 CONTIG62 | 54751  | 55257  | 0.58 | 1.81E-01 | transcription_start_site | - | 50563  | 50563  | -4441 | 17018 AN3841 |
| 2344 CONTIG62 | 54751  | 55257  | 0.58 | 1.81E-01 | transcription_start_site | + | 53806  | 53806  | 1198  | 17023 AN3842 |
| 2344 CONTIG62 | 54751  | 55257  | 0.58 | 1.81E-01 | transcription_start_site | + | 55055  | 55055  | -51   | 17024 AN3843 |
| 2344 CONTIG62 | 54751  | 55257  | 0.58 | 1.81E-01 | transcription_start_site | + | 55233  | 55233  | -229  | 17025 AN3843 |
| 2344 CONTIG62 | 54751  | 55257  | 0.58 | 1.81E-01 | transcription_start_site | + | 55392  | 55392  | -388  | 17026 AN3843 |
| 2344 CONTIG62 | 54751  | 55257  | 0.58 | 1.81E-01 | transcription_start_site | + | 57063  | 57063  | -2059 | 17027 AN3843 |
| 2344 CONTIG62 | 54751  | 55257  | 0.58 | 1.81E-01 | transcription_start_site | + | 57633  | 57633  | -2629 | 17028 AN3844 |
| 705 CONTIG62  | 63302  | 63581  | 2.04 | 0.00E+00 | transcription_start_site | - | 63795  | 63795  | 353   | 17030 AN3845 |
| 705 CONTIG62  | 63302  | 63581  | 2.04 | 0.00E+00 | transcription_start_site | - | 64111  | 64111  | 669   | 17029 AN3845 |
| 2325 CONTIG62 | 68034  | 68904  | 0.63 | 1.97E-01 | transcription_start_site | - | 64111  | 64111  | -4358 | 17029 AN3845 |
| 2325 CONTIG62 | 68034  | 68904  | 0.63 | 1.97E-01 | transcription_start_site | - | 63795  | 63795  | -4674 | 17030 AN3845 |
| 705 CONTIG62  | 63302  | 63581  | 2.04 | 0.00E+00 | transcription_start_site | + | 64337  | 64337  | -895  | 17031 AN3846 |
| 705 CONTIG62  | 63302  | 63581  | 2.04 | 0.00E+00 | transcription_start_site | + | 64649  | 64649  | -1207 | 17032 AN3846 |

|      |          |        |        |      |          |                          |   |        |        |       |       |        |
|------|----------|--------|--------|------|----------|--------------------------|---|--------|--------|-------|-------|--------|
| 1370 | CONTIG62 | 60677  | 61048  | 1.37 | 7.08E-03 | transcription_start_site | + | 64337  | 64337  | -3474 | 17031 | AN3846 |
| 1370 | CONTIG62 | 60677  | 61048  | 1.37 | 7.08E-03 | transcription_start_site | + | 64649  | 64649  | -3786 | 17032 | AN3846 |
| 2325 | CONTIG62 | 68034  | 68904  | 0.63 | 1.97E-01 | transcription_start_site | + | 68785  | 68785  | -316  | 17033 | AN3848 |
| 2325 | CONTIG62 | 68034  | 68904  | 0.63 | 1.97E-01 | transcription_start_site | + | 68966  | 68966  | -497  | 17034 | AN3848 |
| 2325 | CONTIG62 | 68034  | 68904  | 0.63 | 1.97E-01 | transcription_start_site | - | 69439  | 69439  | 970   | 17038 | AN3849 |
| 2325 | CONTIG62 | 68034  | 68904  | 0.63 | 1.97E-01 | transcription_start_site | - | 69776  | 69776  | 1307  | 17037 | AN3849 |
| 2325 | CONTIG62 | 68034  | 68904  | 0.63 | 1.97E-01 | transcription_start_site | + | 70839  | 70839  | -2370 | 17039 | AN3850 |
| 2325 | CONTIG62 | 68034  | 68904  | 0.63 | 1.97E-01 | transcription_start_site | + | 71097  | 71097  | -2628 | 17040 | AN3850 |
| 2220 | CONTIG62 | 95631  | 96356  | 0.77 | 6.50E-02 | transcription_start_site | - | 92359  | 92359  | -3634 | 17055 | AN3860 |
| 2220 | CONTIG62 | 95631  | 96356  | 0.77 | 6.50E-02 | transcription_start_site | - | 91991  | 91991  | -4002 | 17056 | AN3860 |
| 2220 | CONTIG62 | 95631  | 96356  | 0.77 | 6.50E-02 | transcription_start_site | + | 98544  | 98544  | -2550 | 17057 | AN3862 |
| 2220 | CONTIG62 | 95631  | 96356  | 0.77 | 6.50E-02 | transcription_start_site | + | 98811  | 98811  | -2817 | 17058 | AN3862 |
| 2220 | CONTIG62 | 95631  | 96356  | 0.77 | 6.50E-02 | transcription_start_site | + | 98980  | 98980  | -2986 | 17059 | AN3862 |
| 1979 | CONTIG62 | 105621 | 106100 | 0.95 | 4.78E-02 | transcription_start_site | - | 106869 | 106869 | 1008  | 17069 | AN3864 |
| 1979 | CONTIG62 | 105621 | 106100 | 0.95 | 4.78E-02 | transcription_start_site | - | 106966 | 106966 | 1105  | 17068 | AN3864 |
| 1979 | CONTIG62 | 105621 | 106100 | 0.95 | 4.78E-02 | transcription_start_site | + | 107244 | 107244 | -1383 | 17070 | AN3865 |
| 1979 | CONTIG62 | 105621 | 106100 | 0.95 | 4.78E-02 | transcription_start_site | + | 107500 | 107500 | -1639 | 17071 | AN3865 |
| 1979 | CONTIG62 | 105621 | 106100 | 0.95 | 4.78E-02 | transcription_start_site | + | 107667 | 107667 | -1806 | 17072 | AN3865 |
| 1979 | CONTIG62 | 105621 | 106100 | 0.95 | 4.78E-02 | transcription_start_site | + | 107797 | 107797 | -1936 | 17073 | AN3865 |
| 1979 | CONTIG62 | 105621 | 106100 | 0.95 | 4.78E-02 | transcription_start_site | + | 107931 | 107931 | -2070 | 17074 | AN3865 |
| 1979 | CONTIG62 | 105621 | 106100 | 0.95 | 4.78E-02 | transcription_start_site | + | 108107 | 108107 | -2246 | 17075 | AN3865 |
| 1979 | CONTIG62 | 105621 | 106100 | 0.95 | 4.78E-02 | transcription_start_site | + | 108515 | 108515 | -2654 | 17076 | AN3865 |
| 1979 | CONTIG62 | 105621 | 106100 | 0.95 | 4.78E-02 | transcription_start_site | + | 109042 | 109042 | -3181 | 17077 | AN3865 |
| 1979 | CONTIG62 | 105621 | 106100 | 0.95 | 4.78E-02 | transcription_start_site | + | 109986 | 109986 | -4125 | 17078 | AN3866 |
| 2371 | CONTIG62 | 125934 | 126893 | 0.42 | 1.58E-01 | transcription_start_site | - | 126104 | 126104 | -309  | 17099 | AN3872 |
| 2371 | CONTIG62 | 125934 | 126893 | 0.42 | 1.58E-01 | transcription_start_site | + | 126543 | 126543 | -129  | 17100 | AN3873 |
| 2371 | CONTIG62 | 125934 | 126893 | 0.42 | 1.58E-01 | transcription_start_site | + | 126768 | 126768 | -354  | 17101 | AN3873 |
| 2371 | CONTIG62 | 125934 | 126893 | 0.42 | 1.58E-01 | transcription_start_site | + | 127208 | 127208 | -794  | 17102 | AN3873 |
| 2371 | CONTIG62 | 125934 | 126893 | 0.42 | 1.58E-01 | transcription_start_site | + | 127719 | 127719 | -1305 | 17103 | AN3873 |
| 570  | CONTIG62 | 133291 | 133551 | 2.22 | 0.00E+00 | transcription_start_site | - | 130934 | 130934 | -2487 | 17104 | AN3874 |
| 570  | CONTIG62 | 133291 | 133551 | 2.22 | 0.00E+00 | transcription_start_site | - | 130829 | 130829 | -2592 | 17105 | AN3874 |
| 570  | CONTIG62 | 133291 | 133551 | 2.22 | 0.00E+00 | transcription_start_site | - | 132922 | 132922 | -499  | 17106 | AN3875 |
| 570  | CONTIG62 | 133291 | 133551 | 2.22 | 0.00E+00 | transcription_start_site | - | 132407 | 132407 | -1014 | 17107 | AN3875 |
| 570  | CONTIG62 | 133291 | 133551 | 2.22 | 0.00E+00 | transcription_start_site | - | 132130 | 132130 | -1291 | 17108 | AN3875 |
| 570  | CONTIG62 | 133291 | 133551 | 2.22 | 0.00E+00 | transcription_start_site | + | 133911 | 133911 | -490  | 17109 | AN3876 |
| 570  | CONTIG62 | 133291 | 133551 | 2.22 | 0.00E+00 | transcription_start_site | + | 134439 | 134439 | -1018 | 17110 | AN3876 |
| 2363 | CONTIG62 | 143553 | 144877 | 0.48 | 1.96E-01 | transcription_start_site | - | 139372 | 139372 | -4843 | 17111 | AN3877 |
| 2363 | CONTIG62 | 143553 | 144877 | 0.48 | 1.96E-01 | transcription_start_site | - | 139171 | 139171 | -5044 | 17112 | AN3877 |
| 2363 | CONTIG62 | 143553 | 144877 | 0.48 | 1.96E-01 | transcription_start_site | - | 138699 | 138699 | -5516 | 17113 | AN3877 |
| 2363 | CONTIG62 | 143553 | 144877 | 0.48 | 1.96E-01 | transcription_start_site | + | 148099 | 148099 | -3884 | 17114 | AN3879 |
| 2363 | CONTIG62 | 143553 | 144877 | 0.48 | 1.96E-01 | transcription_start_site | + | 148629 | 148629 | -4414 | 17115 | AN3879 |
| 2157 | CONTIG62 | 151278 | 151933 | 0.82 | 4.73E-02 | transcription_start_site | - | 151427 | 151427 | -178  | 17116 | AN3880 |
| 2157 | CONTIG62 | 151278 | 151933 | 0.82 | 4.73E-02 | transcription_start_site | - | 151191 | 151191 | -414  | 17117 | AN3880 |
| 2157 | CONTIG62 | 151278 | 151933 | 0.82 | 4.73E-02 | transcription_start_site | - | 150118 | 150118 | -1487 | 17118 | AN3880 |
| 2157 | CONTIG62 | 151278 | 151933 | 0.82 | 4.73E-02 | transcription_start_site | + | 152920 | 152920 | -1314 | 17119 | AN3881 |
| 2157 | CONTIG62 | 151278 | 151933 | 0.82 | 4.73E-02 | transcription_start_site | + | 155815 | 155815 | -4209 | 17120 | AN3881 |
| 757  | CONTIG62 | 160877 | 161226 | 1.98 | 0.00E+00 | transcription_start_site | - | 158389 | 158389 | -2662 | 17121 | AN3882 |
| 757  | CONTIG62 | 160877 | 161226 | 1.98 | 0.00E+00 | transcription_start_site | - | 156748 | 156748 | -4303 | 17122 | AN3882 |
| 757  | CONTIG62 | 160877 | 161226 | 1.98 | 0.00E+00 | transcription_start_site | + | 162554 | 162554 | -1502 | 17123 | AN3883 |
| 757  | CONTIG62 | 160877 | 161226 | 1.98 | 0.00E+00 | transcription_start_site | + | 162943 | 162943 | -1891 | 17124 | AN3883 |
| 757  | CONTIG62 | 160877 | 161226 | 1.98 | 0.00E+00 | transcription_start_site | + | 163454 | 163454 | -2402 | 17125 | AN3883 |
| 1120 | CONTIG62 | 184207 | 184493 | 1.59 | 1.77E-03 | transcription_start_site | - | 181288 | 181288 | -3062 | 17151 | AN3890 |
| 1120 | CONTIG62 | 184207 | 184493 | 1.59 | 1.77E-03 | transcription_start_site | - | 180639 | 180639 | -3711 | 17152 | AN3890 |
| 1120 | CONTIG62 | 184207 | 184493 | 1.59 | 1.77E-03 | transcription_start_site | - | 180433 | 180433 | -3917 | 17153 | AN3890 |
| 1120 | CONTIG62 | 184207 | 184493 | 1.59 | 1.77E-03 | transcription_start_site | - | 180041 | 180041 | -4309 | 17154 | AN3890 |
| 1120 | CONTIG62 | 184207 | 184493 | 1.59 | 1.77E-03 | transcription_start_site | - | 184392 | 184392 | 42    | 17156 | AN3891 |
| 1120 | CONTIG62 | 184207 | 184493 | 1.59 | 1.77E-03 | transcription_start_site | - | 184534 | 184534 | 184   | 17155 | AN3891 |

|      |          |        |        |      |          |                          |   |        |        |       |       |        |
|------|----------|--------|--------|------|----------|--------------------------|---|--------|--------|-------|-------|--------|
| 1120 | CONTIG62 | 184207 | 184493 | 1.59 | 1.77E-03 | transcription_start_site | - | 184070 | 184070 | -280  | 17157 | AN3891 |
| 1120 | CONTIG62 | 184207 | 184493 | 1.59 | 1.77E-03 | transcription_start_site | - | 183599 | 183599 | -751  | 17158 | AN3891 |
| 1120 | CONTIG62 | 184207 | 184493 | 1.59 | 1.77E-03 | transcription_start_site | + | 187319 | 187319 | -2969 | 17159 | AN3892 |
| 1120 | CONTIG62 | 184207 | 184493 | 1.59 | 1.77E-03 | transcription_start_site | + | 187419 | 187419 | -3069 | 17160 | AN3892 |
| 1120 | CONTIG62 | 184207 | 184493 | 1.59 | 1.77E-03 | transcription_start_site | + | 187606 | 187606 | -3256 | 17161 | AN3892 |
| 2345 | CONTIG62 | 196892 | 197526 | 0.58 | 1.81E-01 | transcription_start_site | - | 197013 | 197013 | -196  | 17173 | AN3894 |
| 2345 | CONTIG62 | 196892 | 197526 | 0.58 | 1.81E-01 | transcription_start_site | - | 196937 | 196937 | -272  | 17174 | AN3894 |
| 2345 | CONTIG62 | 196892 | 197526 | 0.58 | 1.81E-01 | transcription_start_site | + | 197834 | 197834 | -625  | 17175 | AN3895 |
| 2345 | CONTIG62 | 196892 | 197526 | 0.58 | 1.81E-01 | transcription_start_site | + | 198238 | 198238 | -1029 | 17176 | AN3895 |
| 2345 | CONTIG62 | 196892 | 197526 | 0.58 | 1.81E-01 | transcription_start_site | + | 198590 | 198590 | -1381 | 17177 | AN3895 |
| 2345 | CONTIG62 | 196892 | 197526 | 0.58 | 1.81E-01 | transcription_start_site | + | 199142 | 199142 | -1933 | 17178 | AN3895 |
| 55   | CONTIG63 | 7291   | 7625   | 3.22 | 0.00E+00 | transcription_start_site | - | 2975   | 2975   | -4483 | 17181 | AN3897 |
| 55   | CONTIG63 | 7291   | 7625   | 3.22 | 0.00E+00 | transcription_start_site | - | 2782   | 2782   | -4676 | 17182 | AN3897 |
| 55   | CONTIG63 | 7291   | 7625   | 3.22 | 0.00E+00 | transcription_start_site | - | 4857   | 4857   | -2601 | 17183 | AN3898 |
| 55   | CONTIG63 | 7291   | 7625   | 3.22 | 0.00E+00 | transcription_start_site | - | 4560   | 4560   | -2898 | 17184 | AN3898 |
| 55   | CONTIG63 | 7291   | 7625   | 3.22 | 0.00E+00 | transcription_start_site | - | 4090   | 4090   | -3368 | 17185 | AN3898 |
| 55   | CONTIG63 | 7291   | 7625   | 3.22 | 0.00E+00 | transcription_start_site | - | 3924   | 3924   | -3534 | 17186 | AN3898 |
| 1180 | CONTIG63 | 13971  | 14380  | 1.55 | 3.01E-02 | transcription_start_site | - | 11691  | 11691  | -2484 | 17187 | AN3900 |
| 1180 | CONTIG63 | 13971  | 14380  | 1.55 | 3.01E-02 | transcription_start_site | - | 11483  | 11483  | -2692 | 17188 | AN3900 |
| 1180 | CONTIG63 | 13971  | 14380  | 1.55 | 3.01E-02 | transcription_start_site | - | 11324  | 11324  | -2851 | 17189 | AN3900 |
| 1180 | CONTIG63 | 13971  | 14380  | 1.55 | 3.01E-02 | transcription_start_site | - | 10446  | 10446  | -3729 | 17190 | AN3900 |
| 1180 | CONTIG63 | 13971  | 14380  | 1.55 | 3.01E-02 | transcription_start_site | - | 10305  | 10305  | -3870 | 17191 | AN3900 |
| 1180 | CONTIG63 | 13971  | 14380  | 1.55 | 3.01E-02 | transcription_start_site | - | 13896  | 13896  | -279  | 17192 | AN3901 |
| 1180 | CONTIG63 | 13971  | 14380  | 1.55 | 3.01E-02 | transcription_start_site | - | 13729  | 13729  | -446  | 17193 | AN3901 |
| 1180 | CONTIG63 | 13971  | 14380  | 1.55 | 3.01E-02 | transcription_start_site | - | 13357  | 13357  | -818  | 17194 | AN3901 |
| 1003 | CONTIG63 | 33467  | 33801  | 1.71 | 7.36E-03 | transcription_start_site | - | 30643  | 30643  | -2991 | 17201 | AN3905 |
| 1003 | CONTIG63 | 33467  | 33801  | 1.71 | 7.36E-03 | transcription_start_site | - | 29959  | 29959  | -3675 | 17202 | AN3905 |
| 1003 | CONTIG63 | 33467  | 33801  | 1.71 | 7.36E-03 | transcription_start_site | - | 29545  | 29545  | -4089 | 17203 | AN3905 |
| 1003 | CONTIG63 | 33467  | 33801  | 1.71 | 7.36E-03 | transcription_start_site | - | 29300  | 29300  | -4334 | 17204 | AN3905 |
| 1003 | CONTIG63 | 33467  | 33801  | 1.71 | 7.36E-03 | transcription_start_site | + | 34606  | 34606  | -972  | 17205 | AN3906 |
| 1003 | CONTIG63 | 33467  | 33801  | 1.71 | 7.36E-03 | transcription_start_site | + | 37996  | 37996  | -4362 | 17206 | AN3906 |
| 1003 | CONTIG63 | 33467  | 33801  | 1.71 | 7.36E-03 | transcription_start_site | + | 38115  | 38115  | -4481 | 17207 | AN3906 |
| 796  | CONTIG64 | 18834  | 19116  | 1.94 | 2.69E-04 | transcription_start_site | + | 21241  | 21241  | -2266 | 17215 | AN3911 |
| 796  | CONTIG64 | 18834  | 19116  | 1.94 | 2.69E-04 | transcription_start_site | + | 21523  | 21523  | -2548 | 17216 | AN3911 |
| 1450 | CONTIG64 | 19729  | 20617  | 1.3  | 9.75E-04 | transcription_start_site | + | 21241  | 21241  | -1068 | 17215 | AN3911 |
| 1450 | CONTIG64 | 19729  | 20617  | 1.3  | 9.75E-04 | transcription_start_site | + | 21523  | 21523  | -1350 | 17216 | AN3911 |
| 2219 | CONTIG64 | 22143  | 23087  | 0.77 | 1.75E-02 | transcription_start_site | + | 21523  | 21523  | 1092  | 17216 | AN3911 |
| 2219 | CONTIG64 | 22143  | 23087  | 0.77 | 1.75E-02 | transcription_start_site | + | 21241  | 21241  | 1374  | 17215 | AN3911 |
| 2285 | CONTIG64 | 18314  | 18578  | 0.69 | 1.76E-01 | transcription_start_site | + | 21241  | 21241  | -2795 | 17215 | AN3911 |
| 2285 | CONTIG64 | 18314  | 18578  | 0.69 | 1.76E-01 | transcription_start_site | + | 21523  | 21523  | -3077 | 17216 | AN3911 |
| 1701 | CONTIG64 | 52951  | 53378  | 1.13 | 2.63E-02 | transcription_start_site | - | 49310  | 49310  | -3854 | 17232 | AN3917 |
| 1701 | CONTIG64 | 52951  | 53378  | 1.13 | 2.63E-02 | transcription_start_site | - | 48476  | 48476  | -4688 | 17233 | AN3917 |
| 1701 | CONTIG64 | 52951  | 53378  | 1.13 | 2.63E-02 | transcription_start_site | - | 52953  | 52953  | -211  | 17234 | AN3918 |
| 1701 | CONTIG64 | 52951  | 53378  | 1.13 | 2.63E-02 | transcription_start_site | - | 52657  | 52657  | -507  | 17235 | AN3918 |
| 1701 | CONTIG64 | 52951  | 53378  | 1.13 | 2.63E-02 | transcription_start_site | - | 51459  | 51459  | -1705 | 17236 | AN3918 |
| 1701 | CONTIG64 | 52951  | 53378  | 1.13 | 2.63E-02 | transcription_start_site | + | 54000  | 54000  | -835  | 17237 | AN3919 |
| 1701 | CONTIG64 | 52951  | 53378  | 1.13 | 2.63E-02 | transcription_start_site | + | 54478  | 54478  | -1313 | 17238 | AN3919 |
| 1701 | CONTIG64 | 52951  | 53378  | 1.13 | 2.63E-02 | transcription_start_site | + | 56043  | 56043  | -2878 | 17239 | AN3920 |
| 1701 | CONTIG64 | 52951  | 53378  | 1.13 | 2.63E-02 | transcription_start_site | + | 56445  | 56445  | -3280 | 17240 | AN3920 |
| 1701 | CONTIG64 | 52951  | 53378  | 1.13 | 2.63E-02 | transcription_start_site | + | 57193  | 57193  | -4028 | 17241 | AN3920 |
| 2343 | CONTIG64 | 58890  | 59834  | 0.58 | 1.07E-01 | transcription_start_site | - | 59223  | 59223  | -139  | 17242 | AN3921 |
| 2343 | CONTIG64 | 58890  | 59834  | 0.58 | 1.07E-01 | transcription_start_site | + | 59711  | 59711  | -349  | 17243 | AN3922 |
| 2343 | CONTIG64 | 58890  | 59834  | 0.58 | 1.07E-01 | transcription_start_site | + | 59777  | 59777  | -415  | 17244 | AN3922 |
| 2343 | CONTIG64 | 58890  | 59834  | 0.58 | 1.07E-01 | transcription_start_site | + | 60027  | 60027  | -665  | 17245 | AN3922 |
| 2343 | CONTIG64 | 58890  | 59834  | 0.58 | 1.07E-01 | transcription_start_site | + | 60135  | 60135  | -773  | 17246 | AN3922 |
| 2343 | CONTIG64 | 58890  | 59834  | 0.58 | 1.07E-01 | transcription_start_site | + | 60957  | 60957  | -1595 | 17247 | AN3923 |
| 1702 | CONTIG64 | 73060  | 73564  | 1.13 | 2.63E-02 | transcription_start_site | + | 72300  | 72300  | 1012  | 17251 | AN3925 |

|      |          |        |        |      |          |                          |   |        |        |       |       |        |
|------|----------|--------|--------|------|----------|--------------------------|---|--------|--------|-------|-------|--------|
| 1702 | CONTIG64 | 73060  | 73564  | 1.13 | 2.63E-02 | transcription_start_site | + | 75686  | 75686  | -2374 | 17255 | AN3927 |
| 598  | CONTIG64 | 87241  | 87582  | 2.18 | 0.00E+00 | transcription_start_site | + | 87779  | 87779  | -367  | 17259 | AN3931 |
| 598  | CONTIG64 | 87241  | 87582  | 2.18 | 0.00E+00 | transcription_start_site | + | 87838  | 87838  | -426  | 17260 | AN3931 |
| 598  | CONTIG64 | 87241  | 87582  | 2.18 | 0.00E+00 | transcription_start_site | + | 88402  | 88402  | -990  | 17261 | AN3931 |
| 598  | CONTIG64 | 87241  | 87582  | 2.18 | 0.00E+00 | transcription_start_site | + | 89446  | 89446  | -2034 | 17262 | AN3932 |
| 598  | CONTIG64 | 87241  | 87582  | 2.18 | 0.00E+00 | transcription_start_site | + | 89733  | 89733  | -2321 | 17263 | AN3932 |
| 598  | CONTIG64 | 87241  | 87582  | 2.18 | 0.00E+00 | transcription_start_site | + | 89901  | 89901  | -2489 | 17264 | AN3932 |
| 598  | CONTIG64 | 87241  | 87582  | 2.18 | 0.00E+00 | transcription_start_site | + | 90114  | 90114  | -2702 | 17265 | AN3932 |
| 598  | CONTIG64 | 87241  | 87582  | 2.18 | 0.00E+00 | transcription_start_site | + | 90212  | 90212  | -2800 | 17266 | AN3932 |
| 598  | CONTIG64 | 87241  | 87582  | 2.18 | 0.00E+00 | transcription_start_site | + | 90381  | 90381  | -2969 | 17267 | AN3932 |
| 970  | CONTIG64 | 96076  | 96430  | 1.74 | 1.09E-03 | transcription_start_site | - | 94879  | 94879  | -1374 | 17268 | AN3933 |
| 970  | CONTIG64 | 96076  | 96430  | 1.74 | 1.09E-03 | transcription_start_site | - | 94328  | 94328  | -1925 | 17269 | AN3933 |
| 970  | CONTIG64 | 96076  | 96430  | 1.74 | 1.09E-03 | transcription_start_site | - | 91823  | 91823  | -4430 | 17270 | AN3933 |
| 1664 | CONTIG64 | 98036  | 98460  | 1.16 | 1.75E-03 | transcription_start_site | - | 94879  | 94879  | -3369 | 17268 | AN3933 |
| 1664 | CONTIG64 | 98036  | 98460  | 1.16 | 1.75E-03 | transcription_start_site | - | 94328  | 94328  | -3920 | 17269 | AN3933 |
| 1783 | CONTIG64 | 95346  | 95975  | 1.08 | 3.34E-02 | transcription_start_site | - | 94879  | 94879  | -781  | 17268 | AN3933 |
| 1783 | CONTIG64 | 95346  | 95975  | 1.08 | 3.34E-02 | transcription_start_site | - | 94328  | 94328  | -1332 | 17269 | AN3933 |
| 1783 | CONTIG64 | 95346  | 95975  | 1.08 | 3.34E-02 | transcription_start_site | - | 91823  | 91823  | -3837 | 17270 | AN3933 |
| 970  | CONTIG64 | 96076  | 96430  | 1.74 | 1.09E-03 | transcription_start_site | + | 96197  | 96197  | 56    | 17271 | AN3934 |
| 970  | CONTIG64 | 96076  | 96430  | 1.74 | 1.09E-03 | transcription_start_site | + | 96348  | 96348  | -95   | 17272 | AN3934 |
| 970  | CONTIG64 | 96076  | 96430  | 1.74 | 1.09E-03 | transcription_start_site | + | 96565  | 96565  | -312  | 17273 | AN3934 |
| 970  | CONTIG64 | 96076  | 96430  | 1.74 | 1.09E-03 | transcription_start_site | + | 96682  | 96682  | -429  | 17274 | AN3934 |
| 970  | CONTIG64 | 96076  | 96430  | 1.74 | 1.09E-03 | transcription_start_site | + | 96802  | 96802  | -549  | 17275 | AN3934 |
| 1783 | CONTIG64 | 95346  | 95975  | 1.08 | 3.34E-02 | transcription_start_site | + | 96197  | 96197  | -536  | 17271 | AN3934 |
| 1783 | CONTIG64 | 95346  | 95975  | 1.08 | 3.34E-02 | transcription_start_site | + | 96348  | 96348  | -687  | 17272 | AN3934 |
| 1783 | CONTIG64 | 95346  | 95975  | 1.08 | 3.34E-02 | transcription_start_site | + | 96565  | 96565  | -904  | 17273 | AN3934 |
| 1783 | CONTIG64 | 95346  | 95975  | 1.08 | 3.34E-02 | transcription_start_site | + | 96682  | 96682  | -1021 | 17274 | AN3934 |
| 1783 | CONTIG64 | 95346  | 95975  | 1.08 | 3.34E-02 | transcription_start_site | + | 96802  | 96802  | -1141 | 17275 | AN3934 |
| 970  | CONTIG64 | 96076  | 96430  | 1.74 | 1.09E-03 | transcription_start_site | + | 98529  | 98529  | -2276 | 17276 | AN3935 |
| 970  | CONTIG64 | 96076  | 96430  | 1.74 | 1.09E-03 | transcription_start_site | + | 98667  | 98667  | -2414 | 17277 | AN3935 |
| 970  | CONTIG64 | 96076  | 96430  | 1.74 | 1.09E-03 | transcription_start_site | + | 98846  | 98846  | -2593 | 17278 | AN3935 |
| 1664 | CONTIG64 | 98036  | 98460  | 1.16 | 1.75E-03 | transcription_start_site | + | 98529  | 98529  | -281  | 17276 | AN3935 |
| 1664 | CONTIG64 | 98036  | 98460  | 1.16 | 1.75E-03 | transcription_start_site | + | 98667  | 98667  | -419  | 17277 | AN3935 |
| 1664 | CONTIG64 | 98036  | 98460  | 1.16 | 1.75E-03 | transcription_start_site | + | 98846  | 98846  | -598  | 17278 | AN3935 |
| 1783 | CONTIG64 | 95346  | 95975  | 1.08 | 3.34E-02 | transcription_start_site | + | 98529  | 98529  | -2868 | 17276 | AN3935 |
| 1783 | CONTIG64 | 95346  | 95975  | 1.08 | 3.34E-02 | transcription_start_site | + | 98667  | 98667  | -3006 | 17277 | AN3935 |
| 1783 | CONTIG64 | 95346  | 95975  | 1.08 | 3.34E-02 | transcription_start_site | + | 98846  | 98846  | -3185 | 17278 | AN3935 |
| 970  | CONTIG64 | 96076  | 96430  | 1.74 | 1.09E-03 | transcription_start_site | + | 100708 | 100708 | -4455 | 17279 | AN3936 |
| 970  | CONTIG64 | 96076  | 96430  | 1.74 | 1.09E-03 | transcription_start_site | + | 100874 | 100874 | -4621 | 17280 | AN3936 |
| 1664 | CONTIG64 | 98036  | 98460  | 1.16 | 1.75E-03 | transcription_start_site | + | 100708 | 100708 | -2460 | 17279 | AN3936 |
| 1664 | CONTIG64 | 98036  | 98460  | 1.16 | 1.75E-03 | transcription_start_site | + | 100874 | 100874 | -2626 | 17280 | AN3936 |
| 1783 | CONTIG64 | 95346  | 95975  | 1.08 | 3.34E-02 | transcription_start_site | + | 100708 | 100708 | -5047 | 17279 | AN3936 |
| 1783 | CONTIG64 | 95346  | 95975  | 1.08 | 3.34E-02 | transcription_start_site | + | 100874 | 100874 | -5213 | 17280 | AN3936 |
| 2080 | CONTIG64 | 120993 | 121637 | 0.89 | 4.21E-02 | transcription_start_site | - | 117761 | 117761 | -3554 | 17289 | AN3940 |
| 2080 | CONTIG64 | 120993 | 121637 | 0.89 | 4.21E-02 | transcription_start_site | - | 117519 | 117519 | -3796 | 17290 | AN3940 |
| 2080 | CONTIG64 | 120993 | 121637 | 0.89 | 4.21E-02 | transcription_start_site | - | 120620 | 120620 | -695  | 17291 | AN3941 |
| 2080 | CONTIG64 | 120993 | 121637 | 0.89 | 4.21E-02 | transcription_start_site | - | 120286 | 120286 | -1029 | 17292 | AN3941 |
| 2080 | CONTIG64 | 120993 | 121637 | 0.89 | 4.21E-02 | transcription_start_site | - | 120163 | 120163 | -1152 | 17293 | AN3941 |
| 2080 | CONTIG64 | 120993 | 121637 | 0.89 | 4.21E-02 | transcription_start_site | - | 119873 | 119873 | -1442 | 17294 | AN3941 |
| 2151 | CONTIG64 | 123389 | 123900 | 0.83 | 9.60E-02 | transcription_start_site | - | 120620 | 120620 | -3024 | 17291 | AN3941 |
| 2151 | CONTIG64 | 123389 | 123900 | 0.83 | 9.60E-02 | transcription_start_site | - | 120286 | 120286 | -3358 | 17292 | AN3941 |
| 2151 | CONTIG64 | 123389 | 123900 | 0.83 | 9.60E-02 | transcription_start_site | - | 120163 | 120163 | -3481 | 17293 | AN3941 |
| 2151 | CONTIG64 | 123389 | 123900 | 0.83 | 9.60E-02 | transcription_start_site | - | 119873 | 119873 | -3771 | 17294 | AN3941 |
| 2191 | CONTIG64 | 129159 | 129433 | 0.8  | 1.08E-01 | transcription_start_site | - | 127766 | 127766 | -1530 | 17295 | AN3942 |
| 2191 | CONTIG64 | 129159 | 129433 | 0.8  | 1.08E-01 | transcription_start_site | - | 129140 | 129140 | -156  | 17296 | AN3943 |
| 2191 | CONTIG64 | 129159 | 129433 | 0.8  | 1.08E-01 | transcription_start_site | - | 128956 | 128956 | -340  | 17297 | AN3943 |
| 2191 | CONTIG64 | 129159 | 129433 | 0.8  | 1.08E-01 | transcription_start_site | - | 128195 | 128195 | -1101 | 17298 | AN3943 |

|      |          |        |        |      |          |                          |   |        |        |       |       |        |
|------|----------|--------|--------|------|----------|--------------------------|---|--------|--------|-------|-------|--------|
| 2191 | CONTIG64 | 129159 | 129433 | 0.8  | 1.08E-01 | transcription_start_site | + | 132363 | 132363 | -3067 | 17299 | AN3944 |
| 2191 | CONTIG64 | 129159 | 129433 | 0.8  | 1.08E-01 | transcription_start_site | + | 132796 | 132796 | -3500 | 17300 | AN3944 |
| 2191 | CONTIG64 | 129159 | 129433 | 0.8  | 1.08E-01 | transcription_start_site | + | 133408 | 133408 | -4112 | 17301 | AN3944 |
| 2191 | CONTIG64 | 129159 | 129433 | 0.8  | 1.08E-01 | transcription_start_site | + | 134263 | 134263 | -4967 | 17302 | AN3944 |
| 1703 | CONTIG64 | 151729 | 152018 | 1.13 | 2.63E-02 | transcription_start_site | - | 148460 | 148460 | -3413 | 17305 | AN3946 |
| 1703 | CONTIG64 | 151729 | 152018 | 1.13 | 2.63E-02 | transcription_start_site | - | 147360 | 147360 | -4513 | 17306 | AN3946 |
| 1703 | CONTIG64 | 151729 | 152018 | 1.13 | 2.63E-02 | transcription_start_site | - | 146866 | 146866 | -5007 | 17307 | AN3946 |
| 1782 | CONTIG64 | 152629 | 153443 | 1.08 | 4.78E-03 | transcription_start_site | - | 148460 | 148460 | -4576 | 17305 | AN3946 |
| 1703 | CONTIG64 | 151729 | 152018 | 1.13 | 2.63E-02 | transcription_start_site | + | 153729 | 153729 | -1855 | 17313 | AN3948 |
| 1703 | CONTIG64 | 151729 | 152018 | 1.13 | 2.63E-02 | transcription_start_site | + | 154204 | 154204 | -2330 | 17314 | AN3948 |
| 1782 | CONTIG64 | 152629 | 153443 | 1.08 | 4.78E-03 | transcription_start_site | + | 153729 | 153729 | -693  | 17313 | AN3948 |
| 1782 | CONTIG64 | 152629 | 153443 | 1.08 | 4.78E-03 | transcription_start_site | + | 154204 | 154204 | -1168 | 17314 | AN3948 |
| 1782 | CONTIG64 | 152629 | 153443 | 1.08 | 4.78E-03 | transcription_start_site | + | 157966 | 157966 | -4930 | 17315 | AN3949 |
| 1782 | CONTIG64 | 152629 | 153443 | 1.08 | 4.78E-03 | transcription_start_site | + | 158417 | 158417 | -5381 | 17316 | AN3949 |
| 1950 | CONTIG64 | 173495 | 174577 | 0.97 | 1.71E-02 | transcription_start_site | - | 173558 | 173558 | -478  | 17333 | AN3952 |
| 1950 | CONTIG64 | 173495 | 174577 | 0.97 | 1.71E-02 | transcription_start_site | - | 172862 | 172862 | -1174 | 17334 | AN3952 |
| 1950 | CONTIG64 | 173495 | 174577 | 0.97 | 1.71E-02 | transcription_start_site | - | 172747 | 172747 | -1289 | 17335 | AN3952 |
| 1950 | CONTIG64 | 173495 | 174577 | 0.97 | 1.71E-02 | transcription_start_site | - | 171780 | 171780 | -2256 | 17336 | AN3952 |
| 1950 | CONTIG64 | 173495 | 174577 | 0.97 | 1.71E-02 | transcription_start_site | - | 171623 | 171623 | -2413 | 17337 | AN3952 |
| 1950 | CONTIG64 | 173495 | 174577 | 0.97 | 1.71E-02 | transcription_start_site | - | 171483 | 171483 | -2553 | 17338 | AN3952 |
| 1950 | CONTIG64 | 173495 | 174577 | 0.97 | 1.71E-02 | transcription_start_site | - | 171283 | 171283 | -2753 | 17339 | AN3952 |
| 1950 | CONTIG64 | 173495 | 174577 | 0.97 | 1.71E-02 | transcription_start_site | - | 171162 | 171162 | -2874 | 17340 | AN3952 |
| 1950 | CONTIG64 | 173495 | 174577 | 0.97 | 1.71E-02 | transcription_start_site | - | 170475 | 170475 | -3561 | 17341 | AN3952 |
| 1950 | CONTIG64 | 173495 | 174577 | 0.97 | 1.71E-02 | transcription_start_site | - | 170349 | 170349 | -3687 | 17342 | AN3952 |
| 1950 | CONTIG64 | 173495 | 174577 | 0.97 | 1.71E-02 | transcription_start_site | - | 169967 | 169967 | -4069 | 17343 | AN3952 |
| 1950 | CONTIG64 | 173495 | 174577 | 0.97 | 1.71E-02 | transcription_start_site | - | 169690 | 169690 | -4346 | 17344 | AN3952 |
| 1950 | CONTIG64 | 173495 | 174577 | 0.97 | 1.71E-02 | transcription_start_site | - | 169363 | 169363 | -4673 | 17345 | AN3952 |
| 1950 | CONTIG64 | 173495 | 174577 | 0.97 | 1.71E-02 | transcription_start_site | - | 169009 | 169009 | -5027 | 17346 | AN3952 |
| 1997 | CONTIG64 | 177543 | 178263 | 0.94 | 3.02E-02 | transcription_start_site | - | 173558 | 173558 | -4345 | 17333 | AN3952 |
| 1997 | CONTIG64 | 177543 | 178263 | 0.94 | 3.02E-02 | transcription_start_site | - | 172862 | 172862 | -5041 | 17334 | AN3952 |
| 1997 | CONTIG64 | 177543 | 178263 | 0.94 | 3.02E-02 | transcription_start_site | - | 172747 | 172747 | -5156 | 17335 | AN3952 |
| 1997 | CONTIG64 | 177543 | 178263 | 0.94 | 3.02E-02 | transcription_start_site | - | 176865 | 176865 | -1038 | 17347 | AN3953 |
| 1950 | CONTIG64 | 173495 | 174577 | 0.97 | 1.71E-02 | transcription_start_site | + | 178271 | 178271 | -4235 | 17348 | AN3954 |
| 1950 | CONTIG64 | 173495 | 174577 | 0.97 | 1.71E-02 | transcription_start_site | + | 178621 | 178621 | -4585 | 17349 | AN3954 |
| 1950 | CONTIG64 | 173495 | 174577 | 0.97 | 1.71E-02 | transcription_start_site | + | 178825 | 178825 | -4789 | 17350 | AN3954 |
| 1950 | CONTIG64 | 173495 | 174577 | 0.97 | 1.71E-02 | transcription_start_site | + | 179322 | 179322 | -5286 | 17351 | AN3954 |
| 1997 | CONTIG64 | 177543 | 178263 | 0.94 | 3.02E-02 | transcription_start_site | + | 178271 | 178271 | -368  | 17348 | AN3954 |
| 1997 | CONTIG64 | 177543 | 178263 | 0.94 | 3.02E-02 | transcription_start_site | + | 178621 | 178621 | -718  | 17349 | AN3954 |
| 1997 | CONTIG64 | 177543 | 178263 | 0.94 | 3.02E-02 | transcription_start_site | + | 178825 | 178825 | -922  | 17350 | AN3954 |
| 1997 | CONTIG64 | 177543 | 178263 | 0.94 | 3.02E-02 | transcription_start_site | + | 179322 | 179322 | -1419 | 17351 | AN3954 |
| 1997 | CONTIG64 | 177543 | 178263 | 0.94 | 3.02E-02 | transcription_start_site | + | 179802 | 179802 | -1899 | 17352 | AN3954 |
| 1997 | CONTIG64 | 177543 | 178263 | 0.94 | 3.02E-02 | transcription_start_site | + | 180998 | 180998 | -3095 | 17353 | AN3955 |
| 1997 | CONTIG64 | 177543 | 178263 | 0.94 | 3.02E-02 | transcription_start_site | + | 181248 | 181248 | -3345 | 17354 | AN3955 |
| 1997 | CONTIG64 | 177543 | 178263 | 0.94 | 3.02E-02 | transcription_start_site | + | 181806 | 181806 | -3903 | 17355 | AN3955 |
| 1371 | CONTIG65 | 1291   | 1560   | 1.37 | 7.08E-03 | transcription_start_site | + | 6303   | 6303   | -4877 | 17375 | AN3963 |
| 2106 | CONTIG65 | 11713  | 12057  | 0.87 | 6.74E-02 | transcription_start_site | + | 10770  | 10770  | 1115  | 17386 | AN3965 |
| 2106 | CONTIG65 | 11713  | 12057  | 0.87 | 6.74E-02 | transcription_start_site | + | 12197  | 12197  | -312  | 17387 | AN3966 |
| 2106 | CONTIG65 | 11713  | 12057  | 0.87 | 6.74E-02 | transcription_start_site | + | 12954  | 12954  | -1069 | 17388 | AN3966 |
| 1440 | CONTIG65 | 14408  | 15292  | 1.31 | 9.32E-03 | transcription_start_site | + | 14529  | 14529  | 321   | 17390 | AN3967 |
| 1440 | CONTIG65 | 14408  | 15292  | 1.31 | 9.32E-03 | transcription_start_site | + | 15268  | 15268  | -418  | 17391 | AN3967 |
| 1440 | CONTIG65 | 14408  | 15292  | 1.31 | 9.32E-03 | transcription_start_site | + | 14303  | 14303  | 547   | 17389 | AN3967 |
| 2106 | CONTIG65 | 11713  | 12057  | 0.87 | 6.74E-02 | transcription_start_site | + | 14303  | 14303  | -2418 | 17389 | AN3967 |
| 2106 | CONTIG65 | 11713  | 12057  | 0.87 | 6.74E-02 | transcription_start_site | + | 14529  | 14529  | -2644 | 17390 | AN3967 |
| 2106 | CONTIG65 | 11713  | 12057  | 0.87 | 6.74E-02 | transcription_start_site | + | 15268  | 15268  | -3383 | 17391 | AN3967 |
| 1440 | CONTIG65 | 14408  | 15292  | 1.31 | 9.32E-03 | transcription_start_site | + | 18868  | 18868  | -4018 | 17392 | AN3968 |
| 2158 | CONTIG65 | 18528  | 19942  | 0.82 | 4.73E-02 | transcription_start_site | + | 18868  | 18868  | 367   | 17392 | AN3968 |
| 2268 | CONTIG65 | 17853  | 18142  | 0.71 | 1.38E-01 | transcription_start_site | + | 18868  | 18868  | -870  | 17392 | AN3968 |



|      |          |        |        |      |          |                          |   |        |        |       |       |        |
|------|----------|--------|--------|------|----------|--------------------------|---|--------|--------|-------|-------|--------|
| 2158 | CONTIG65 | 18528  | 19942  | 0.82 | 4.73E-02 | transcription_start_site | + | 22792  | 22792  | -3557 | 17393 | AN3969 |
| 2158 | CONTIG65 | 18528  | 19942  | 0.82 | 4.73E-02 | transcription_start_site | + | 23075  | 23075  | -3840 | 17394 | AN3969 |
| 2158 | CONTIG65 | 18528  | 19942  | 0.82 | 4.73E-02 | transcription_start_site | + | 23617  | 23617  | -4382 | 17395 | AN3969 |
| 2268 | CONTIG65 | 17853  | 18142  | 0.71 | 1.38E-01 | transcription_start_site | + | 22792  | 22792  | -4794 | 17393 | AN3969 |
| 2268 | CONTIG65 | 17853  | 18142  | 0.71 | 1.38E-01 | transcription_start_site | + | 23075  | 23075  | -5077 | 17394 | AN3969 |
| 2201 | CONTIG65 | 29481  | 29910  | 0.79 | 9.60E-02 | transcription_start_site | - | 25624  | 25624  | -4071 | 17396 | AN3970 |
| 2165 | CONTIG65 | 34131  | 34580  | 0.82 | 8.63E-02 | transcription_start_site | - | 34334  | 34334  | -21   | 17397 | AN3972 |
| 2165 | CONTIG65 | 34131  | 34580  | 0.82 | 8.63E-02 | transcription_start_site | - | 31777  | 31777  | -2578 | 17398 | AN3972 |
| 2165 | CONTIG65 | 34131  | 34580  | 0.82 | 8.63E-02 | transcription_start_site | - | 35001  | 35001  | 645   | 17401 | AN3973 |
| 2165 | CONTIG65 | 34131  | 34580  | 0.82 | 8.63E-02 | transcription_start_site | - | 35230  | 35230  | 874   | 17400 | AN3973 |
| 2165 | CONTIG65 | 34131  | 34580  | 0.82 | 8.63E-02 | transcription_start_site | - | 35447  | 35447  | 1091  | 17399 | AN3973 |
| 2165 | CONTIG65 | 34131  | 34580  | 0.82 | 8.63E-02 | transcription_start_site | + | 36325  | 36325  | -1969 | 17402 | AN3974 |
| 2165 | CONTIG65 | 34131  | 34580  | 0.82 | 8.63E-02 | transcription_start_site | + | 36948  | 36948  | -2592 | 17403 | AN3974 |
| 2107 | CONTIG65 | 49215  | 49634  | 0.87 | 6.74E-02 | transcription_start_site | - | 48285  | 48285  | -1139 | 17406 | AN3977 |
| 2107 | CONTIG65 | 49215  | 49634  | 0.87 | 6.74E-02 | transcription_start_site | - | 48068  | 48068  | -1356 | 17407 | AN3977 |
| 2107 | CONTIG65 | 49215  | 49634  | 0.87 | 6.74E-02 | transcription_start_site | - | 47664  | 47664  | -1760 | 17408 | AN3977 |
| 1827 | CONTIG65 | 53637  | 53976  | 1.05 | 3.01E-02 | transcription_start_site | + | 56230  | 56230  | -2423 | 17409 | AN3979 |
| 2108 | CONTIG65 | 112370 | 112647 | 0.87 | 6.74E-02 | transcription_start_site | - | 110208 | 110208 | -2300 | 17455 | AN3997 |
| 2108 | CONTIG65 | 112370 | 112647 | 0.87 | 6.74E-02 | transcription_start_site | - | 109954 | 109954 | -2554 | 17456 | AN3997 |
| 2108 | CONTIG65 | 112370 | 112647 | 0.87 | 6.74E-02 | transcription_start_site | - | 112131 | 112131 | -377  | 17457 | AN3998 |
| 2108 | CONTIG65 | 112370 | 112647 | 0.87 | 6.74E-02 | transcription_start_site | + | 114940 | 114940 | -2431 | 17458 | AN3999 |
| 1372 | CONTIG65 | 143118 | 143387 | 1.37 | 7.08E-03 | transcription_start_site | + | 144182 | 144182 | -929  | 17487 | AN4008 |
| 1372 | CONTIG65 | 143118 | 143387 | 1.37 | 7.08E-03 | transcription_start_site | + | 144390 | 144390 | -1137 | 17488 | AN4008 |
| 1372 | CONTIG65 | 143118 | 143387 | 1.37 | 7.08E-03 | transcription_start_site | + | 144562 | 144562 | -1309 | 17489 | AN4008 |
| 1372 | CONTIG65 | 143118 | 143387 | 1.37 | 7.08E-03 | transcription_start_site | + | 144767 | 144767 | -1514 | 17490 | AN4008 |
| 1372 | CONTIG65 | 143118 | 143387 | 1.37 | 7.08E-03 | transcription_start_site | + | 147601 | 147601 | -4348 | 17493 | AN4010 |
| 1001 | CONTIG65 | 154508 | 154778 | 1.71 | 7.06E-04 | transcription_start_site | + | 154229 | 154229 | 414   | 17500 | AN4012 |
| 1001 | CONTIG65 | 154508 | 154778 | 1.71 | 7.06E-04 | transcription_start_site | + | 154129 | 154129 | 514   | 17499 | AN4012 |
| 1001 | CONTIG65 | 154508 | 154778 | 1.71 | 7.06E-04 | transcription_start_site | + | 155065 | 155065 | -422  | 17501 | AN4013 |
| 1001 | CONTIG65 | 154508 | 154778 | 1.71 | 7.06E-04 | transcription_start_site | + | 155189 | 155189 | -546  | 17502 | AN4013 |
| 1001 | CONTIG65 | 154508 | 154778 | 1.71 | 7.06E-04 | transcription_start_site | + | 155296 | 155296 | -653  | 17503 | AN4013 |
| 1001 | CONTIG65 | 154508 | 154778 | 1.71 | 7.06E-04 | transcription_start_site | + | 156453 | 156453 | -1810 | 17504 | AN4013 |
| 1001 | CONTIG65 | 154508 | 154778 | 1.71 | 7.06E-04 | transcription_start_site | + | 156616 | 156616 | -1973 | 17505 | AN4013 |
| 1001 | CONTIG65 | 154508 | 154778 | 1.71 | 7.06E-04 | transcription_start_site | + | 156711 | 156711 | -2068 | 17506 | AN4013 |
| 1001 | CONTIG65 | 154508 | 154778 | 1.71 | 7.06E-04 | transcription_start_site | + | 156887 | 156887 | -2244 | 17507 | AN4013 |
| 2269 | CONTIG65 | 169517 | 170091 | 0.71 | 1.38E-01 | transcription_start_site | - | 168922 | 168922 | -882  | 17522 | AN4017 |
| 2269 | CONTIG65 | 169517 | 170091 | 0.71 | 1.38E-01 | transcription_start_site | - | 168819 | 168819 | -985  | 17523 | AN4017 |
| 2269 | CONTIG65 | 169517 | 170091 | 0.71 | 1.38E-01 | transcription_start_site | - | 168709 | 168709 | -1095 | 17524 | AN4017 |
| 2269 | CONTIG65 | 169517 | 170091 | 0.71 | 1.38E-01 | transcription_start_site | - | 167936 | 167936 | -1868 | 17525 | AN4017 |
| 2269 | CONTIG65 | 169517 | 170091 | 0.71 | 1.38E-01 | transcription_start_site | + | 169648 | 169648 | 156   | 17526 | AN4018 |
| 2269 | CONTIG65 | 169517 | 170091 | 0.71 | 1.38E-01 | transcription_start_site | + | 170572 | 170572 | -768  | 17527 | AN4018 |
| 2269 | CONTIG65 | 169517 | 170091 | 0.71 | 1.38E-01 | transcription_start_site | + | 172013 | 172013 | -2209 | 17528 | AN4018 |
| 2269 | CONTIG65 | 169517 | 170091 | 0.71 | 1.38E-01 | transcription_start_site | + | 172945 | 172945 | -3141 | 17529 | AN4019 |
| 2269 | CONTIG65 | 169517 | 170091 | 0.71 | 1.38E-01 | transcription_start_site | + | 173053 | 173053 | -3249 | 17530 | AN4019 |
| 2269 | CONTIG65 | 169517 | 170091 | 0.71 | 1.38E-01 | transcription_start_site | + | 173137 | 173137 | -3333 | 17531 | AN4019 |
| 2269 | CONTIG65 | 169517 | 170091 | 0.71 | 1.38E-01 | transcription_start_site | + | 173222 | 173222 | -3418 | 17532 | AN4019 |
| 2269 | CONTIG65 | 169517 | 170091 | 0.71 | 1.38E-01 | transcription_start_site | + | 173784 | 173784 | -3980 | 17533 | AN4019 |
| 2269 | CONTIG65 | 169517 | 170091 | 0.71 | 1.38E-01 | transcription_start_site | + | 174198 | 174198 | -4394 | 17534 | AN4019 |
| 2306 | CONTIG65 | 181818 | 182542 | 0.66 | 1.15E-01 | transcription_start_site | - | 177977 | 177977 | -4203 | 17537 | AN4021 |
| 2306 | CONTIG65 | 181818 | 182542 | 0.66 | 1.15E-01 | transcription_start_site | - | 177756 | 177756 | -4424 | 17538 | AN4021 |
| 2306 | CONTIG65 | 181818 | 182542 | 0.66 | 1.15E-01 | transcription_start_site | - | 177321 | 177321 | -4859 | 17539 | AN4021 |
| 2337 | CONTIG65 | 178054 | 179169 | 0.6  | 1.57E-01 | transcription_start_site | - | 177977 | 177977 | -634  | 17537 | AN4021 |
| 2337 | CONTIG65 | 178054 | 179169 | 0.6  | 1.57E-01 | transcription_start_site | - | 177756 | 177756 | -855  | 17538 | AN4021 |
| 2337 | CONTIG65 | 178054 | 179169 | 0.6  | 1.57E-01 | transcription_start_site | - | 177321 | 177321 | -1290 | 17539 | AN4021 |
| 2306 | CONTIG65 | 181818 | 182542 | 0.66 | 1.15E-01 | transcription_start_site | - | 180827 | 180827 | -1353 | 17540 | AN4022 |
| 2307 | CONTIG65 | 183243 | 183662 | 0.66 | 1.76E-01 | transcription_start_site | - | 180827 | 180827 | -2625 | 17540 | AN4022 |
| 2306 | CONTIG65 | 181818 | 182542 | 0.66 | 1.15E-01 | transcription_start_site | - | 182494 | 182494 | 314   | 17542 | AN4023 |

|      |          |        |        |      |          |                          |   |        |        |       |       |        |
|------|----------|--------|--------|------|----------|--------------------------|---|--------|--------|-------|-------|--------|
| 2306 | CONTIG65 | 181818 | 182542 | 0.66 | 1.15E-01 | transcription_start_site | - | 183111 | 183111 | 931   | 17541 | AN4023 |
| 2307 | CONTIG65 | 183243 | 183662 | 0.66 | 1.76E-01 | transcription_start_site | - | 183111 | 183111 | -341  | 17541 | AN4023 |
| 2307 | CONTIG65 | 183243 | 183662 | 0.66 | 1.76E-01 | transcription_start_site | - | 182494 | 182494 | -958  | 17542 | AN4023 |
| 2306 | CONTIG65 | 181818 | 182542 | 0.66 | 1.15E-01 | transcription_start_site | + | 183710 | 183710 | -1530 | 17543 | AN4024 |
| 2306 | CONTIG65 | 181818 | 182542 | 0.66 | 1.15E-01 | transcription_start_site | + | 183912 | 183912 | -1732 | 17544 | AN4024 |
| 2306 | CONTIG65 | 181818 | 182542 | 0.66 | 1.15E-01 | transcription_start_site | + | 184181 | 184181 | -2001 | 17545 | AN4024 |
| 2306 | CONTIG65 | 181818 | 182542 | 0.66 | 1.15E-01 | transcription_start_site | + | 184822 | 184822 | -2642 | 17546 | AN4024 |
| 2307 | CONTIG65 | 183243 | 183662 | 0.66 | 1.76E-01 | transcription_start_site | + | 183710 | 183710 | -257  | 17543 | AN4024 |
| 2307 | CONTIG65 | 183243 | 183662 | 0.66 | 1.76E-01 | transcription_start_site | + | 183912 | 183912 | -459  | 17544 | AN4024 |
| 2307 | CONTIG65 | 183243 | 183662 | 0.66 | 1.76E-01 | transcription_start_site | + | 184181 | 184181 | -728  | 17545 | AN4024 |
| 2307 | CONTIG65 | 183243 | 183662 | 0.66 | 1.76E-01 | transcription_start_site | + | 184822 | 184822 | -1369 | 17546 | AN4024 |
| 2337 | CONTIG65 | 178054 | 179169 | 0.6  | 1.57E-01 | transcription_start_site | + | 183710 | 183710 | -5098 | 17543 | AN4024 |
| 2337 | CONTIG65 | 178054 | 179169 | 0.6  | 1.57E-01 | transcription_start_site | + | 183912 | 183912 | -5300 | 17544 | AN4024 |
| 460  | CONTIG65 | 188183 | 188687 | 2.37 | 0.00E+00 | transcription_start_site | - | 187535 | 187535 | -900  | 17547 | AN4025 |
| 460  | CONTIG65 | 188183 | 188687 | 2.37 | 0.00E+00 | transcription_start_site | - | 187332 | 187332 | -1103 | 17548 | AN4025 |
| 460  | CONTIG65 | 188183 | 188687 | 2.37 | 0.00E+00 | transcription_start_site | - | 186327 | 186327 | -2108 | 17549 | AN4025 |
| 460  | CONTIG65 | 188183 | 188687 | 2.37 | 0.00E+00 | transcription_start_site | + | 189460 | 189460 | -1025 | 17550 | AN4026 |
| 460  | CONTIG65 | 188183 | 188687 | 2.37 | 0.00E+00 | transcription_start_site | + | 189746 | 189746 | -1311 | 17551 | AN4026 |
| 460  | CONTIG65 | 188183 | 188687 | 2.37 | 0.00E+00 | transcription_start_site | + | 190924 | 190924 | -2489 | 17552 | AN4026 |
| 460  | CONTIG65 | 188183 | 188687 | 2.37 | 0.00E+00 | transcription_start_site | + | 191082 | 191082 | -2647 | 17553 | AN4026 |
| 460  | CONTIG65 | 188183 | 188687 | 2.37 | 0.00E+00 | transcription_start_site | + | 191455 | 191455 | -3020 | 17554 | AN4026 |
| 2109 | CONTIG65 | 201545 | 201889 | 0.87 | 6.74E-02 | transcription_start_site | - | 199470 | 199470 | -2247 | 17557 | AN4028 |
| 2109 | CONTIG65 | 201545 | 201889 | 0.87 | 6.74E-02 | transcription_start_site | - | 197288 | 197288 | -4429 | 17558 | AN4028 |
| 2109 | CONTIG65 | 201545 | 201889 | 0.87 | 6.74E-02 | transcription_start_site | - | 200721 | 200721 | -996  | 17559 | AN4029 |
| 2109 | CONTIG65 | 201545 | 201889 | 0.87 | 6.74E-02 | transcription_start_site | - | 200616 | 200616 | -1101 | 17560 | AN4029 |
| 2109 | CONTIG65 | 201545 | 201889 | 0.87 | 6.74E-02 | transcription_start_site | - | 200373 | 200373 | -1344 | 17561 | AN4029 |
| 1582 | CONTIG65 | 214059 | 214483 | 1.21 | 1.37E-02 | transcription_start_site | - | 211703 | 211703 | -2568 | 17565 | AN4032 |
| 1582 | CONTIG65 | 214059 | 214483 | 1.21 | 1.37E-02 | transcription_start_site | - | 209248 | 209248 | -5023 | 17566 | AN4032 |
| 2082 | CONTIG65 | 214514 | 215094 | 0.89 | 6.04E-02 | transcription_start_site | - | 211703 | 211703 | -3101 | 17565 | AN4032 |
| 1582 | CONTIG65 | 214059 | 214483 | 1.21 | 1.37E-02 | transcription_start_site | + | 215129 | 215129 | -858  | 17571 | AN4034 |
| 1582 | CONTIG65 | 214059 | 214483 | 1.21 | 1.37E-02 | transcription_start_site | + | 215529 | 215529 | -1258 | 17572 | AN4034 |
| 1582 | CONTIG65 | 214059 | 214483 | 1.21 | 1.37E-02 | transcription_start_site | + | 215692 | 215692 | -1421 | 17573 | AN4034 |
| 1582 | CONTIG65 | 214059 | 214483 | 1.21 | 1.37E-02 | transcription_start_site | + | 215904 | 215904 | -1633 | 17574 | AN4034 |
| 2082 | CONTIG65 | 214514 | 215094 | 0.89 | 6.04E-02 | transcription_start_site | + | 215129 | 215129 | -325  | 17571 | AN4034 |
| 2082 | CONTIG65 | 214514 | 215094 | 0.89 | 6.04E-02 | transcription_start_site | + | 215529 | 215529 | -725  | 17572 | AN4034 |
| 2082 | CONTIG65 | 214514 | 215094 | 0.89 | 6.04E-02 | transcription_start_site | + | 215692 | 215692 | -888  | 17573 | AN4034 |
| 2082 | CONTIG65 | 214514 | 215094 | 0.89 | 6.04E-02 | transcription_start_site | + | 215904 | 215904 | -1100 | 17574 | AN4034 |
| 1129 | CONTIG65 | 236630 | 236920 | 1.58 | 1.77E-03 | transcription_start_site | - | 231746 | 231746 | -5029 | 17589 | AN4039 |
| 1129 | CONTIG65 | 236630 | 236920 | 1.58 | 1.77E-03 | transcription_start_site | - | 233716 | 233716 | -3059 | 17591 | AN4040 |
| 1129 | CONTIG65 | 236630 | 236920 | 1.58 | 1.77E-03 | transcription_start_site | - | 232449 | 232449 | -4326 | 17592 | AN4040 |
| 1129 | CONTIG65 | 236630 | 236920 | 1.58 | 1.77E-03 | transcription_start_site | - | 235292 | 235292 | -1483 | 17593 | AN4041 |
| 1129 | CONTIG65 | 236630 | 236920 | 1.58 | 1.77E-03 | transcription_start_site | + | 237261 | 237261 | -486  | 17594 | AN4042 |
| 1129 | CONTIG65 | 236630 | 236920 | 1.58 | 1.77E-03 | transcription_start_site | + | 237471 | 237471 | -696  | 17595 | AN4042 |
| 1129 | CONTIG65 | 236630 | 236920 | 1.58 | 1.77E-03 | transcription_start_site | + | 237683 | 237683 | -908  | 17596 | AN4042 |
| 1129 | CONTIG65 | 236630 | 236920 | 1.58 | 1.77E-03 | transcription_start_site | + | 238986 | 238986 | -2211 | 17597 | AN4042 |
| 1468 | CONTIG65 | 259742 | 260766 | 1.29 | 0.00E+00 | transcription_start_site | - | 256219 | 256219 | -4035 | 17604 | AN4047 |
| 1468 | CONTIG65 | 259742 | 260766 | 1.29 | 0.00E+00 | transcription_start_site | - | 255022 | 255022 | -5232 | 17605 | AN4047 |
| 1318 | CONTIG65 | 261392 | 261900 | 1.42 | 5.08E-03 | transcription_start_site | - | 258825 | 258825 | -2821 | 17607 | AN4049 |
| 1468 | CONTIG65 | 259742 | 260766 | 1.29 | 0.00E+00 | transcription_start_site | - | 258825 | 258825 | -1429 | 17607 | AN4049 |
| 2326 | CONTIG65 | 263792 | 264576 | 0.63 | 1.97E-01 | transcription_start_site | - | 258825 | 258825 | -5359 | 17607 | AN4049 |
| 1318 | CONTIG65 | 261392 | 261900 | 1.42 | 5.08E-03 | transcription_start_site | - | 262192 | 262192 | 546   | 17611 | AN4050 |
| 1318 | CONTIG65 | 261392 | 261900 | 1.42 | 5.08E-03 | transcription_start_site | - | 262693 | 262693 | 1047  | 17610 | AN4050 |
| 2326 | CONTIG65 | 263792 | 264576 | 0.63 | 1.97E-01 | transcription_start_site | - | 263673 | 263673 | -511  | 17608 | AN4050 |
| 2326 | CONTIG65 | 263792 | 264576 | 0.63 | 1.97E-01 | transcription_start_site | - | 263151 | 263151 | -1033 | 17609 | AN4050 |
| 2326 | CONTIG65 | 263792 | 264576 | 0.63 | 1.97E-01 | transcription_start_site | - | 262693 | 262693 | -1491 | 17610 | AN4050 |
| 2326 | CONTIG65 | 263792 | 264576 | 0.63 | 1.97E-01 | transcription_start_site | - | 262192 | 262192 | -1992 | 17611 | AN4050 |
| 2326 | CONTIG65 | 263792 | 264576 | 0.63 | 1.97E-01 | transcription_start_site | - | 265256 | 265256 | 1072  | 17614 | AN4051 |

|      |          |        |        |      |          |                          |   |        |        |       |       |        |
|------|----------|--------|--------|------|----------|--------------------------|---|--------|--------|-------|-------|--------|
| 2326 | CONTIG65 | 263792 | 264576 | 0.63 | 1.97E-01 | transcription_start_site | + | 268012 | 268012 | -3828 | 17615 | AN4052 |
| 2326 | CONTIG65 | 263792 | 264576 | 0.63 | 1.97E-01 | transcription_start_site | + | 268125 | 268125 | -3941 | 17616 | AN4052 |
| 2326 | CONTIG65 | 263792 | 264576 | 0.63 | 1.97E-01 | transcription_start_site | + | 268648 | 268648 | -4464 | 17617 | AN4052 |
| 2326 | CONTIG65 | 263792 | 264576 | 0.63 | 1.97E-01 | transcription_start_site | + | 269131 | 269131 | -4947 | 17618 | AN4052 |
| 1308 | CONTIG66 | 6017   | 6375   | 1.43 | 2.05E-02 | transcription_start_site | - | 4897   | 4897   | -1299 | 17635 | AN4057 |
| 1308 | CONTIG66 | 6017   | 6375   | 1.43 | 2.05E-02 | transcription_start_site | - | 4623   | 4623   | -1573 | 17636 | AN4057 |
| 1308 | CONTIG66 | 6017   | 6375   | 1.43 | 2.05E-02 | transcription_start_site | + | 10926  | 10926  | -4730 | 17644 | AN4060 |
| 1308 | CONTIG66 | 6017   | 6375   | 1.43 | 2.05E-02 | transcription_start_site | + | 11318  | 11318  | -5122 | 17645 | AN4060 |
| 1473 | CONTIG66 | 14707  | 14991  | 1.29 | 3.34E-02 | transcription_start_site | - | 12795  | 12795  | -2054 | 17647 | AN4061 |
| 1473 | CONTIG66 | 14707  | 14991  | 1.29 | 3.34E-02 | transcription_start_site | - | 12563  | 12563  | -2286 | 17648 | AN4061 |
| 1473 | CONTIG66 | 14707  | 14991  | 1.29 | 3.34E-02 | transcription_start_site | - | 12153  | 12153  | -2696 | 17649 | AN4061 |
| 1667 | CONTIG66 | 15617  | 15881  | 1.16 | 5.36E-02 | transcription_start_site | - | 12795  | 12795  | -2954 | 17647 | AN4061 |
| 1667 | CONTIG66 | 15617  | 15881  | 1.16 | 5.36E-02 | transcription_start_site | - | 12563  | 12563  | -3186 | 17648 | AN4061 |
| 1667 | CONTIG66 | 15617  | 15881  | 1.16 | 5.36E-02 | transcription_start_site | - | 12153  | 12153  | -3596 | 17649 | AN4061 |
| 1473 | CONTIG66 | 14707  | 14991  | 1.29 | 3.34E-02 | transcription_start_site | + | 15812  | 15812  | -963  | 17650 | AN4062 |
| 1667 | CONTIG66 | 15617  | 15881  | 1.16 | 5.36E-02 | transcription_start_site | + | 15812  | 15812  | -63   | 17650 | AN4062 |
| 781  | CONTIG66 | 20489  | 20918  | 1.96 | 0.00E+00 | transcription_start_site | - | 18652  | 18652  | -2051 | 17651 | AN4063 |
| 2025 | CONTIG66 | 18462  | 18898  | 0.93 | 1.22E-01 | transcription_start_site | - | 18652  | 18652  | -28   | 17651 | AN4063 |
| 781  | CONTIG66 | 20489  | 20918  | 1.96 | 0.00E+00 | transcription_start_site | - | 20324  | 20324  | -379  | 17652 | AN4064 |
| 781  | CONTIG66 | 20489  | 20918  | 1.96 | 0.00E+00 | transcription_start_site | - | 20079  | 20079  | -624  | 17653 | AN4064 |
| 781  | CONTIG66 | 20489  | 20918  | 1.96 | 0.00E+00 | transcription_start_site | - | 19936  | 19936  | -767  | 17654 | AN4064 |
| 781  | CONTIG66 | 20489  | 20918  | 1.96 | 0.00E+00 | transcription_start_site | - | 19564  | 19564  | -1139 | 17655 | AN4064 |
| 2025 | CONTIG66 | 18462  | 18898  | 0.93 | 1.22E-01 | transcription_start_site | - | 19564  | 19564  | 884   | 17655 | AN4064 |
| 781  | CONTIG66 | 20489  | 20918  | 1.96 | 0.00E+00 | transcription_start_site | + | 23855  | 23855  | -3151 | 17658 | AN4066 |
| 781  | CONTIG66 | 20489  | 20918  | 1.96 | 0.00E+00 | transcription_start_site | + | 24001  | 24001  | -3297 | 17659 | AN4066 |
| 781  | CONTIG66 | 20489  | 20918  | 1.96 | 0.00E+00 | transcription_start_site | + | 24414  | 24414  | -3710 | 17660 | AN4066 |
| 2025 | CONTIG66 | 18462  | 18898  | 0.93 | 1.22E-01 | transcription_start_site | + | 23855  | 23855  | -5175 | 17658 | AN4066 |
| 198  | CONTIG66 | 34884  | 35315  | 2.82 | 0.00E+00 | transcription_start_site | - | 31547  | 31547  | -3552 | 17667 | AN4069 |
| 198  | CONTIG66 | 34884  | 35315  | 2.82 | 0.00E+00 | transcription_start_site | - | 31139  | 31139  | -3960 | 17668 | AN4069 |
| 198  | CONTIG66 | 34884  | 35315  | 2.82 | 0.00E+00 | transcription_start_site | - | 30948  | 30948  | -4151 | 17669 | AN4069 |
| 198  | CONTIG66 | 34884  | 35315  | 2.82 | 0.00E+00 | transcription_start_site | - | 34421  | 34421  | -678  | 17672 | AN4071 |
| 198  | CONTIG66 | 34884  | 35315  | 2.82 | 0.00E+00 | transcription_start_site | - | 34333  | 34333  | -766  | 17673 | AN4071 |
| 198  | CONTIG66 | 34884  | 35315  | 2.82 | 0.00E+00 | transcription_start_site | - | 34168  | 34168  | -931  | 17674 | AN4071 |
| 198  | CONTIG66 | 34884  | 35315  | 2.82 | 0.00E+00 | transcription_start_site | - | 33615  | 33615  | -1484 | 17675 | AN4071 |
| 198  | CONTIG66 | 34884  | 35315  | 2.82 | 0.00E+00 | transcription_start_site | + | 36068  | 36068  | -968  | 17676 | AN4072 |
| 198  | CONTIG66 | 34884  | 35315  | 2.82 | 0.00E+00 | transcription_start_site | + | 39610  | 39610  | -4510 | 17677 | AN4072 |
| 198  | CONTIG66 | 34884  | 35315  | 2.82 | 0.00E+00 | transcription_start_site | + | 40178  | 40178  | -5078 | 17678 | AN4073 |
| 198  | CONTIG66 | 34884  | 35315  | 2.82 | 0.00E+00 | transcription_start_site | + | 40282  | 40282  | -5182 | 17679 | AN4073 |
| 2198 | CONTIG66 | 55503  | 55784  | 0.8  | 1.97E-01 | transcription_start_site | - | 53402  | 53402  | -2241 | 17687 | AN4077 |
| 2198 | CONTIG66 | 55503  | 55784  | 0.8  | 1.97E-01 | transcription_start_site | - | 52903  | 52903  | -2740 | 17688 | AN4077 |
| 2198 | CONTIG66 | 55503  | 55784  | 0.8  | 1.97E-01 | transcription_start_site | - | 52831  | 52831  | -2812 | 17689 | AN4077 |
| 2198 | CONTIG66 | 55503  | 55784  | 0.8  | 1.97E-01 | transcription_start_site | - | 55466  | 55466  | -177  | 17691 | AN4078 |
| 2198 | CONTIG66 | 55503  | 55784  | 0.8  | 1.97E-01 | transcription_start_site | - | 55383  | 55383  | -260  | 17692 | AN4078 |
| 2198 | CONTIG66 | 55503  | 55784  | 0.8  | 1.97E-01 | transcription_start_site | - | 56085  | 56085  | 441   | 17690 | AN4078 |
| 2198 | CONTIG66 | 55503  | 55784  | 0.8  | 1.97E-01 | transcription_start_site | - | 55127  | 55127  | -516  | 17693 | AN4078 |
| 315  | CONTIG67 | 8944   | 9443   | 2.6  | 2.69E-04 | transcription_start_site | + | 10748  | 10748  | -1554 | 17745 | AN4088 |
| 1861 | CONTIG67 | 7671   | 8300   | 1.04 | 1.22E-01 | transcription_start_site | + | 10748  | 10748  | -2762 | 17745 | AN4088 |
| 315  | CONTIG67 | 8944   | 9443   | 2.6  | 2.69E-04 | transcription_start_site | + | 13102  | 13102  | -3908 | 17746 | AN4089 |
| 1861 | CONTIG67 | 7671   | 8300   | 1.04 | 1.22E-01 | transcription_start_site | + | 13102  | 13102  | -5116 | 17746 | AN4089 |
| 1622 | CONTIG67 | 28803  | 29178  | 1.19 | 7.66E-02 | transcription_start_site | - | 28763  | 28763  | -227  | 17763 | AN4094 |
| 1622 | CONTIG67 | 28803  | 29178  | 1.19 | 7.66E-02 | transcription_start_site | - | 28638  | 28638  | -352  | 17764 | AN4094 |
| 1622 | CONTIG67 | 28803  | 29178  | 1.19 | 7.66E-02 | transcription_start_site | + | 29236  | 29236  | -245  | 17765 | AN4095 |
| 1622 | CONTIG67 | 28803  | 29178  | 1.19 | 7.66E-02 | transcription_start_site | + | 29645  | 29645  | -654  | 17766 | AN4095 |
| 1622 | CONTIG67 | 28803  | 29178  | 1.19 | 7.66E-02 | transcription_start_site | + | 29968  | 29968  | -977  | 17767 | AN4095 |
| 1622 | CONTIG67 | 28803  | 29178  | 1.19 | 7.66E-02 | transcription_start_site | + | 30471  | 30471  | -1480 | 17768 | AN4095 |
| 767  | CONTIG67 | 44779  | 45668  | 1.97 | 0.00E+00 | transcription_start_site | - | 41655  | 41655  | -3568 | 17774 | AN4099 |
| 767  | CONTIG67 | 44779  | 45668  | 1.97 | 0.00E+00 | transcription_start_site | - | 41058  | 41058  | -4165 | 17775 | AN4099 |

|               |        |        |      |          |                          |   |        |        |       |       |        |
|---------------|--------|--------|------|----------|--------------------------|---|--------|--------|-------|-------|--------|
| 767 CONTIG67  | 44779  | 45668  | 1.97 | 0.00E+00 | transcription_start_site | - | 40916  | 40916  | -4307 | 17776 | AN4099 |
| 767 CONTIG67  | 44779  | 45668  | 1.97 | 0.00E+00 | transcription_start_site | - | 40727  | 40727  | -4496 | 17777 | AN4099 |
| 767 CONTIG67  | 44779  | 45668  | 1.97 | 0.00E+00 | transcription_start_site | - | 40399  | 40399  | -4824 | 17778 | AN4099 |
| 767 CONTIG67  | 44779  | 45668  | 1.97 | 0.00E+00 | transcription_start_site | - | 40250  | 40250  | -4973 | 17779 | AN4099 |
| 767 CONTIG67  | 44779  | 45668  | 1.97 | 0.00E+00 | transcription_start_site | - | 44257  | 44257  | -966  | 17784 | AN4101 |
| 767 CONTIG67  | 44779  | 45668  | 1.97 | 0.00E+00 | transcription_start_site | - | 43949  | 43949  | -1274 | 17785 | AN4101 |
| 767 CONTIG67  | 44779  | 45668  | 1.97 | 0.00E+00 | transcription_start_site | - | 43753  | 43753  | -1470 | 17786 | AN4101 |
| 767 CONTIG67  | 44779  | 45668  | 1.97 | 0.00E+00 | transcription_start_site | - | 43543  | 43543  | -1680 | 17787 | AN4101 |
| 767 CONTIG67  | 44779  | 45668  | 1.97 | 0.00E+00 | transcription_start_site | + | 46064  | 46064  | -840  | 17788 | AN4102 |
| 767 CONTIG67  | 44779  | 45668  | 1.97 | 0.00E+00 | transcription_start_site | + | 46173  | 46173  | -949  | 17789 | AN4102 |
| 767 CONTIG67  | 44779  | 45668  | 1.97 | 0.00E+00 | transcription_start_site | + | 46366  | 46366  | -1142 | 17790 | AN4102 |
| 767 CONTIG67  | 44779  | 45668  | 1.97 | 0.00E+00 | transcription_start_site | + | 46457  | 46457  | -1233 | 17791 | AN4102 |
| 767 CONTIG67  | 44779  | 45668  | 1.97 | 0.00E+00 | transcription_start_site | + | 46562  | 46562  | -1338 | 17792 | AN4102 |
| 767 CONTIG67  | 44779  | 45668  | 1.97 | 0.00E+00 | transcription_start_site | + | 47800  | 47800  | -2576 | 17793 | AN4102 |
| 767 CONTIG67  | 44779  | 45668  | 1.97 | 0.00E+00 | transcription_start_site | + | 48717  | 48717  | -3493 | 17794 | AN4102 |
| 767 CONTIG67  | 44779  | 45668  | 1.97 | 0.00E+00 | transcription_start_site | + | 49564  | 49564  | -4340 | 17795 | AN4103 |
| 767 CONTIG67  | 44779  | 45668  | 1.97 | 0.00E+00 | transcription_start_site | + | 49730  | 49730  | -4506 | 17796 | AN4103 |
| 767 CONTIG67  | 44779  | 45668  | 1.97 | 0.00E+00 | transcription_start_site | + | 50041  | 50041  | -4817 | 17797 | AN4103 |
| 767 CONTIG67  | 44779  | 45668  | 1.97 | 0.00E+00 | transcription_start_site | + | 50268  | 50268  | -5044 | 17798 | AN4103 |
| 767 CONTIG67  | 44779  | 45668  | 1.97 | 0.00E+00 | transcription_start_site | + | 50417  | 50417  | -5193 | 17799 | AN4103 |
| 712 CONTIG67  | 72387  | 72882  | 2.04 | 4.57E-03 | transcription_start_site | - | 67852  | 67852  | -4782 | 17837 | AN4110 |
| 712 CONTIG67  | 72387  | 72882  | 2.04 | 4.57E-03 | transcription_start_site | - | 67674  | 67674  | -4960 | 17838 | AN4110 |
| 712 CONTIG67  | 72387  | 72882  | 2.04 | 4.57E-03 | transcription_start_site | - | 67513  | 67513  | -5121 | 17839 | AN4110 |
| 712 CONTIG67  | 72387  | 72882  | 2.04 | 4.57E-03 | transcription_start_site | + | 72819  | 72819  | -184  | 17847 | AN4113 |
| 712 CONTIG67  | 72387  | 72882  | 2.04 | 4.57E-03 | transcription_start_site | + | 72943  | 72943  | -308  | 17848 | AN4113 |
| 1966 CONTIG67 | 85877  | 86391  | 0.97 | 1.54E-01 | transcription_start_site | - | 83047  | 83047  | -3087 | 17849 | AN4114 |
| 1966 CONTIG67 | 85877  | 86391  | 0.97 | 1.54E-01 | transcription_start_site | - | 82344  | 82344  | -3790 | 17850 | AN4114 |
| 1966 CONTIG67 | 85877  | 86391  | 0.97 | 1.54E-01 | transcription_start_site | - | 81341  | 81341  | -4793 | 17851 | AN4114 |
| 1966 CONTIG67 | 85877  | 86391  | 0.97 | 1.54E-01 | transcription_start_site | - | 81060  | 81060  | -5074 | 17852 | AN4114 |
| 1966 CONTIG67 | 85877  | 86391  | 0.97 | 1.54E-01 | transcription_start_site | + | 85629  | 85629  | 505   | 17855 | AN4115 |
| 1966 CONTIG67 | 85877  | 86391  | 0.97 | 1.54E-01 | transcription_start_site | + | 85414  | 85414  | 720   | 17854 | AN4115 |
| 1292 CONTIG67 | 107103 | 107382 | 1.45 | 3.34E-02 | transcription_start_site | - | 104038 | 104038 | -3204 | 17868 | AN4121 |
| 1292 CONTIG67 | 107103 | 107382 | 1.45 | 3.34E-02 | transcription_start_site | - | 103697 | 103697 | -3545 | 17869 | AN4121 |
| 1292 CONTIG67 | 107103 | 107382 | 1.45 | 3.34E-02 | transcription_start_site | - | 102654 | 102654 | -4588 | 17870 | AN4121 |
| 1292 CONTIG67 | 107103 | 107382 | 1.45 | 3.34E-02 | transcription_start_site | - | 106889 | 106889 | -353  | 17871 | AN4122 |
| 1292 CONTIG67 | 107103 | 107382 | 1.45 | 3.34E-02 | transcription_start_site | - | 106298 | 106298 | -944  | 17872 | AN4122 |
| 1292 CONTIG67 | 107103 | 107382 | 1.45 | 3.34E-02 | transcription_start_site | - | 105924 | 105924 | -1318 | 17873 | AN4122 |
| 1292 CONTIG67 | 107103 | 107382 | 1.45 | 3.34E-02 | transcription_start_site | - | 105802 | 105802 | -1440 | 17874 | AN4122 |
| 1292 CONTIG67 | 107103 | 107382 | 1.45 | 3.34E-02 | transcription_start_site | + | 107377 | 107377 | -134  | 17875 | AN4123 |
| 1967 CONTIG67 | 112503 | 112782 | 0.97 | 1.54E-01 | transcription_start_site | - | 110438 | 110438 | -2204 | 17876 | AN4124 |
| 1967 CONTIG67 | 112503 | 112782 | 0.97 | 1.54E-01 | transcription_start_site | - | 109062 | 109062 | -3580 | 17877 | AN4124 |
| 1292 CONTIG67 | 107103 | 107382 | 1.45 | 3.34E-02 | transcription_start_site | + | 111068 | 111068 | -3825 | 17878 | AN4125 |
| 1292 CONTIG67 | 107103 | 107382 | 1.45 | 3.34E-02 | transcription_start_site | + | 112110 | 112110 | -4867 | 17879 | AN4126 |
| 1292 CONTIG67 | 107103 | 107382 | 1.45 | 3.34E-02 | transcription_start_site | + | 112218 | 112218 | -4975 | 17880 | AN4126 |
| 1967 CONTIG67 | 112503 | 112782 | 0.97 | 1.54E-01 | transcription_start_site | + | 112740 | 112740 | -97   | 17881 | AN4126 |
| 1967 CONTIG67 | 112503 | 112782 | 0.97 | 1.54E-01 | transcription_start_site | + | 112218 | 112218 | 424   | 17880 | AN4126 |
| 1967 CONTIG67 | 112503 | 112782 | 0.97 | 1.54E-01 | transcription_start_site | + | 113167 | 113167 | -524  | 17882 | AN4126 |
| 1967 CONTIG67 | 112503 | 112782 | 0.97 | 1.54E-01 | transcription_start_site | + | 112110 | 112110 | 532   | 17879 | AN4126 |
| 1967 CONTIG67 | 112503 | 112782 | 0.97 | 1.54E-01 | transcription_start_site | + | 113704 | 113704 | -1061 | 17883 | AN4126 |
| 1967 CONTIG67 | 112503 | 112782 | 0.97 | 1.54E-01 | transcription_start_site | + | 113881 | 113881 | -1238 | 17884 | AN4126 |
| 1967 CONTIG67 | 112503 | 112782 | 0.97 | 1.54E-01 | transcription_start_site | + | 116383 | 116383 | -3740 | 17885 | AN4127 |
| 2093 CONTIG67 | 147090 | 147444 | 0.89 | 1.97E-01 | transcription_start_site | - | 142392 | 142392 | -4875 | 17913 | AN4134 |
| 2093 CONTIG67 | 147090 | 147444 | 0.89 | 1.97E-01 | transcription_start_site | - | 142311 | 142311 | -4956 | 17914 | AN4134 |
| 2093 CONTIG67 | 147090 | 147444 | 0.89 | 1.97E-01 | transcription_start_site | + | 146941 | 146941 | 326   | 17921 | AN4136 |
| 2093 CONTIG67 | 147090 | 147444 | 0.89 | 1.97E-01 | transcription_start_site | + | 146599 | 146599 | 668   | 17920 | AN4136 |
| 2093 CONTIG67 | 147090 | 147444 | 0.89 | 1.97E-01 | transcription_start_site | + | 146404 | 146404 | 863   | 17919 | AN4136 |
| 1790 CONTIG67 | 166520 | 166863 | 1.08 | 1.08E-01 | transcription_start_site | - | 161722 | 161722 | -4969 | 17936 | AN4141 |

|      |          |        |        |      |          |                          |   |        |        |       |       |        |
|------|----------|--------|--------|------|----------|--------------------------|---|--------|--------|-------|-------|--------|
| 1790 | CONTIG67 | 166520 | 166863 | 1.08 | 1.08E-01 | transcription_start_site | - | 161576 | 161576 | -5115 | 17937 | AN4141 |
| 1557 | CONTIG67 | 167345 | 167692 | 1.23 | 6.74E-02 | transcription_start_site | - | 164601 | 164601 | -2917 | 17940 | AN4142 |
| 1790 | CONTIG67 | 166520 | 166863 | 1.08 | 1.08E-01 | transcription_start_site | - | 164601 | 164601 | -2090 | 17940 | AN4142 |
| 1557 | CONTIG67 | 167345 | 167692 | 1.23 | 6.74E-02 | transcription_start_site | + | 168120 | 168120 | -601  | 17941 | AN4143 |
| 1557 | CONTIG67 | 167345 | 167692 | 1.23 | 6.74E-02 | transcription_start_site | + | 168732 | 168732 | -1213 | 17942 | AN4143 |
| 1790 | CONTIG67 | 166520 | 166863 | 1.08 | 1.08E-01 | transcription_start_site | + | 168120 | 168120 | -1428 | 17941 | AN4143 |
| 1790 | CONTIG67 | 166520 | 166863 | 1.08 | 1.08E-01 | transcription_start_site | + | 168732 | 168732 | -2040 | 17942 | AN4143 |
| 708  | CONTIG67 | 179855 | 180279 | 2.04 | 1.41E-03 | transcription_start_site | - | 176304 | 176304 | -3763 | 17945 | AN4145 |
| 1007 | CONTIG67 | 179035 | 179480 | 1.71 | 1.37E-02 | transcription_start_site | - | 176304 | 176304 | -2953 | 17945 | AN4145 |
| 1007 | CONTIG67 | 179035 | 179480 | 1.71 | 1.37E-02 | transcription_start_site | - | 174729 | 174729 | -4528 | 17946 | AN4145 |
| 1007 | CONTIG67 | 179035 | 179480 | 1.71 | 1.37E-02 | transcription_start_site | - | 174180 | 174180 | -5077 | 17947 | AN4145 |
| 708  | CONTIG67 | 179855 | 180279 | 2.04 | 1.41E-03 | transcription_start_site | - | 177258 | 177258 | -2809 | 17949 | AN4146 |
| 1007 | CONTIG67 | 179035 | 179480 | 1.71 | 1.37E-02 | transcription_start_site | - | 177258 | 177258 | -1999 | 17949 | AN4146 |
| 1007 | CONTIG67 | 179035 | 179480 | 1.71 | 1.37E-02 | transcription_start_site | + | 178716 | 178716 | 541   | 17951 | AN4147 |
| 1007 | CONTIG67 | 179035 | 179480 | 1.71 | 1.37E-02 | transcription_start_site | + | 178061 | 178061 | 1196  | 17950 | AN4147 |
| 708  | CONTIG67 | 179855 | 180279 | 2.04 | 1.41E-03 | transcription_start_site | + | 180804 | 180804 | -737  | 17952 | AN4148 |
| 708  | CONTIG67 | 179855 | 180279 | 2.04 | 1.41E-03 | transcription_start_site | + | 181075 | 181075 | -1008 | 17953 | AN4148 |
| 708  | CONTIG67 | 179855 | 180279 | 2.04 | 1.41E-03 | transcription_start_site | + | 181349 | 181349 | -1282 | 17954 | AN4148 |
| 708  | CONTIG67 | 179855 | 180279 | 2.04 | 1.41E-03 | transcription_start_site | + | 182339 | 182339 | -2272 | 17955 | AN4148 |
| 1007 | CONTIG67 | 179035 | 179480 | 1.71 | 1.37E-02 | transcription_start_site | + | 180804 | 180804 | -1546 | 17952 | AN4148 |
| 1007 | CONTIG67 | 179035 | 179480 | 1.71 | 1.37E-02 | transcription_start_site | + | 181075 | 181075 | -1817 | 17953 | AN4148 |
| 1007 | CONTIG67 | 179035 | 179480 | 1.71 | 1.37E-02 | transcription_start_site | + | 181349 | 181349 | -2091 | 17954 | AN4148 |
| 1007 | CONTIG67 | 179035 | 179480 | 1.71 | 1.37E-02 | transcription_start_site | + | 182339 | 182339 | -3081 | 17955 | AN4148 |
| 730  | CONTIG67 | 197251 | 197695 | 2.01 | 2.65E-03 | transcription_start_site | - | 194277 | 194277 | -3196 | 17963 | AN4152 |
| 730  | CONTIG67 | 197251 | 197695 | 2.01 | 2.65E-03 | transcription_start_site | - | 194124 | 194124 | -3349 | 17964 | AN4152 |
| 730  | CONTIG67 | 197251 | 197695 | 2.01 | 2.65E-03 | transcription_start_site | - | 193978 | 193978 | -3495 | 17965 | AN4152 |
| 730  | CONTIG67 | 197251 | 197695 | 2.01 | 2.65E-03 | transcription_start_site | - | 192932 | 192932 | -4541 | 17966 | AN4152 |
| 730  | CONTIG67 | 197251 | 197695 | 2.01 | 2.65E-03 | transcription_start_site | - | 192574 | 192574 | -4899 | 17967 | AN4152 |
| 730  | CONTIG67 | 197251 | 197695 | 2.01 | 2.65E-03 | transcription_start_site | - | 196738 | 196738 | -735  | 17968 | AN4153 |
| 730  | CONTIG67 | 197251 | 197695 | 2.01 | 2.65E-03 | transcription_start_site | - | 196618 | 196618 | -855  | 17969 | AN4153 |
| 730  | CONTIG67 | 197251 | 197695 | 2.01 | 2.65E-03 | transcription_start_site | - | 196444 | 196444 | -1029 | 17970 | AN4153 |
| 730  | CONTIG67 | 197251 | 197695 | 2.01 | 2.65E-03 | transcription_start_site | - | 195930 | 195930 | -1543 | 17971 | AN4153 |
| 730  | CONTIG67 | 197251 | 197695 | 2.01 | 2.65E-03 | transcription_start_site | + | 197711 | 197711 | -238  | 17972 | AN4154 |
| 730  | CONTIG67 | 197251 | 197695 | 2.01 | 2.65E-03 | transcription_start_site | + | 201808 | 201808 | -4335 | 17975 | AN4156 |
| 730  | CONTIG67 | 197251 | 197695 | 2.01 | 2.65E-03 | transcription_start_site | + | 202018 | 202018 | -4545 | 17976 | AN4156 |
| 730  | CONTIG67 | 197251 | 197695 | 2.01 | 2.65E-03 | transcription_start_site | + | 202253 | 202253 | -4780 | 17977 | AN4156 |
| 730  | CONTIG67 | 197251 | 197695 | 2.01 | 2.65E-03 | transcription_start_site | + | 202631 | 202631 | -5158 | 17978 | AN4156 |
| 2024 | CONTIG67 | 209406 | 209995 | 0.93 | 1.15E-01 | transcription_start_site | - | 205963 | 205963 | -3737 | 17981 | AN4157 |
| 2024 | CONTIG67 | 209406 | 209995 | 0.93 | 1.15E-01 | transcription_start_site | - | 205609 | 205609 | -4091 | 17982 | AN4157 |
| 2024 | CONTIG67 | 209406 | 209995 | 0.93 | 1.15E-01 | transcription_start_site | - | 205213 | 205213 | -4487 | 17983 | AN4157 |
| 2024 | CONTIG67 | 209406 | 209995 | 0.93 | 1.15E-01 | transcription_start_site | - | 204736 | 204736 | -4964 | 17984 | AN4157 |
| 2024 | CONTIG67 | 209406 | 209995 | 0.93 | 1.15E-01 | transcription_start_site | - | 204546 | 204546 | -5154 | 17985 | AN4157 |
| 454  | CONTIG67 | 212785 | 213659 | 2.38 | 0.00E+00 | transcription_start_site | - | 207896 | 207896 | -5326 | 17987 | AN4158 |
| 1046 | CONTIG67 | 211285 | 211638 | 1.67 | 1.54E-02 | transcription_start_site | - | 207896 | 207896 | -3565 | 17987 | AN4158 |
| 1046 | CONTIG67 | 211285 | 211638 | 1.67 | 1.54E-02 | transcription_start_site | - | 207684 | 207684 | -3777 | 17988 | AN4158 |
| 1046 | CONTIG67 | 211285 | 211638 | 1.67 | 1.54E-02 | transcription_start_site | - | 207499 | 207499 | -3962 | 17989 | AN4158 |
| 1378 | CONTIG67 | 211805 | 212384 | 1.37 | 4.20E-02 | transcription_start_site | - | 207896 | 207896 | -4198 | 17987 | AN4158 |
| 1378 | CONTIG67 | 211805 | 212384 | 1.37 | 4.20E-02 | transcription_start_site | - | 207684 | 207684 | -4410 | 17988 | AN4158 |
| 1378 | CONTIG67 | 211805 | 212384 | 1.37 | 4.20E-02 | transcription_start_site | - | 207499 | 207499 | -4595 | 17989 | AN4158 |
| 2024 | CONTIG67 | 209406 | 209995 | 0.93 | 1.15E-01 | transcription_start_site | - | 207896 | 207896 | -1804 | 17987 | AN4158 |
| 2024 | CONTIG67 | 209406 | 209995 | 0.93 | 1.15E-01 | transcription_start_site | - | 207684 | 207684 | -2016 | 17988 | AN4158 |
| 2024 | CONTIG67 | 209406 | 209995 | 0.93 | 1.15E-01 | transcription_start_site | - | 207499 | 207499 | -2201 | 17989 | AN4158 |
| 454  | CONTIG67 | 212785 | 213659 | 2.38 | 0.00E+00 | transcription_start_site | - | 211211 | 211211 | -2011 | 17990 | AN4159 |
| 454  | CONTIG67 | 212785 | 213659 | 2.38 | 0.00E+00 | transcription_start_site | - | 211148 | 211148 | -2074 | 17991 | AN4159 |
| 454  | CONTIG67 | 212785 | 213659 | 2.38 | 0.00E+00 | transcription_start_site | - | 211042 | 211042 | -2180 | 17992 | AN4159 |
| 454  | CONTIG67 | 212785 | 213659 | 2.38 | 0.00E+00 | transcription_start_site | - | 210781 | 210781 | -2441 | 17993 | AN4159 |
| 454  | CONTIG67 | 212785 | 213659 | 2.38 | 0.00E+00 | transcription_start_site | - | 209806 | 209806 | -3416 | 17994 | AN4159 |

|      |          |        |        |      |          |                          |   |        |        |       |       |        |
|------|----------|--------|--------|------|----------|--------------------------|---|--------|--------|-------|-------|--------|
| 1046 | CONTIG67 | 211285 | 211638 | 1.67 | 1.54E-02 | transcription_start_site | - | 211211 | 211211 | -250  | 17990 | AN4159 |
| 1046 | CONTIG67 | 211285 | 211638 | 1.67 | 1.54E-02 | transcription_start_site | - | 211148 | 211148 | -313  | 17991 | AN4159 |
| 1046 | CONTIG67 | 211285 | 211638 | 1.67 | 1.54E-02 | transcription_start_site | - | 211042 | 211042 | -419  | 17992 | AN4159 |
| 1046 | CONTIG67 | 211285 | 211638 | 1.67 | 1.54E-02 | transcription_start_site | - | 210781 | 210781 | -680  | 17993 | AN4159 |
| 1046 | CONTIG67 | 211285 | 211638 | 1.67 | 1.54E-02 | transcription_start_site | - | 209806 | 209806 | -1655 | 17994 | AN4159 |
| 1378 | CONTIG67 | 211805 | 212384 | 1.37 | 4.20E-02 | transcription_start_site | - | 211211 | 211211 | -883  | 17990 | AN4159 |
| 1378 | CONTIG67 | 211805 | 212384 | 1.37 | 4.20E-02 | transcription_start_site | - | 211148 | 211148 | -946  | 17991 | AN4159 |
| 1378 | CONTIG67 | 211805 | 212384 | 1.37 | 4.20E-02 | transcription_start_site | - | 211042 | 211042 | -1052 | 17992 | AN4159 |
| 1378 | CONTIG67 | 211805 | 212384 | 1.37 | 4.20E-02 | transcription_start_site | - | 210781 | 210781 | -1313 | 17993 | AN4159 |
| 1378 | CONTIG67 | 211805 | 212384 | 1.37 | 4.20E-02 | transcription_start_site | - | 209806 | 209806 | -2288 | 17994 | AN4159 |
| 2024 | CONTIG67 | 209406 | 209995 | 0.93 | 1.15E-01 | transcription_start_site | - | 209806 | 209806 | 105   | 17994 | AN4159 |
| 2024 | CONTIG67 | 209406 | 209995 | 0.93 | 1.15E-01 | transcription_start_site | - | 210781 | 210781 | 1080  | 17993 | AN4159 |
| 454  | CONTIG67 | 212785 | 213659 | 2.38 | 0.00E+00 | transcription_start_site | - | 214387 | 214387 | 1165  | 17997 | AN4160 |
| 1680 | CONTIG67 | 232216 | 232490 | 1.15 | 8.63E-02 | transcription_start_site | - | 229289 | 229289 | -3064 | 18012 | AN4166 |
| 1680 | CONTIG67 | 232216 | 232490 | 1.15 | 8.63E-02 | transcription_start_site | - | 229117 | 229117 | -3236 | 18013 | AN4166 |
| 1680 | CONTIG67 | 232216 | 232490 | 1.15 | 8.63E-02 | transcription_start_site | - | 228861 | 228861 | -3492 | 18014 | AN4166 |
| 1680 | CONTIG67 | 232216 | 232490 | 1.15 | 8.63E-02 | transcription_start_site | - | 227874 | 227874 | -4479 | 18015 | AN4166 |
| 1680 | CONTIG67 | 232216 | 232490 | 1.15 | 8.63E-02 | transcription_start_site | - | 227524 | 227524 | -4829 | 18016 | AN4166 |
| 1680 | CONTIG67 | 232216 | 232490 | 1.15 | 8.63E-02 | transcription_start_site | - | 227268 | 227268 | -5085 | 18017 | AN4166 |
| 1680 | CONTIG67 | 232216 | 232490 | 1.15 | 8.63E-02 | transcription_start_site | - | 232312 | 232312 | -41   | 18019 | AN4167 |
| 1680 | CONTIG67 | 232216 | 232490 | 1.15 | 8.63E-02 | transcription_start_site | - | 231955 | 231955 | -398  | 18020 | AN4167 |
| 1680 | CONTIG67 | 232216 | 232490 | 1.15 | 8.63E-02 | transcription_start_site | + | 232740 | 232740 | -387  | 18021 | AN4168 |
| 1680 | CONTIG67 | 232216 | 232490 | 1.15 | 8.63E-02 | transcription_start_site | + | 232876 | 232876 | -523  | 18022 | AN4168 |
| 1680 | CONTIG67 | 232216 | 232490 | 1.15 | 8.63E-02 | transcription_start_site | + | 233041 | 233041 | -688  | 18023 | AN4168 |
| 1680 | CONTIG67 | 232216 | 232490 | 1.15 | 8.63E-02 | transcription_start_site | + | 234159 | 234159 | -1806 | 18024 | AN4168 |
| 199  | CONTIG67 | 244358 | 244797 | 2.82 | 0.00E+00 | transcription_start_site | + | 247018 | 247018 | -2440 | 18028 | AN4170 |
| 199  | CONTIG67 | 244358 | 244797 | 2.82 | 0.00E+00 | transcription_start_site | + | 247150 | 247150 | -2572 | 18029 | AN4170 |
| 199  | CONTIG67 | 244358 | 244797 | 2.82 | 0.00E+00 | transcription_start_site | + | 247358 | 247358 | -2780 | 18030 | AN4170 |
| 199  | CONTIG67 | 244358 | 244797 | 2.82 | 0.00E+00 | transcription_start_site | + | 247727 | 247727 | -3149 | 18031 | AN4170 |
| 199  | CONTIG67 | 244358 | 244797 | 2.82 | 0.00E+00 | transcription_start_site | + | 248206 | 248206 | -3628 | 18032 | AN4170 |
| 1110 | CONTIG67 | 246243 | 246739 | 1.6  | 2.05E-02 | transcription_start_site | + | 247018 | 247018 | -527  | 18028 | AN4170 |
| 1110 | CONTIG67 | 246243 | 246739 | 1.6  | 2.05E-02 | transcription_start_site | + | 247150 | 247150 | -659  | 18029 | AN4170 |
| 1110 | CONTIG67 | 246243 | 246739 | 1.6  | 2.05E-02 | transcription_start_site | + | 247358 | 247358 | -867  | 18030 | AN4170 |
| 1110 | CONTIG67 | 246243 | 246739 | 1.6  | 2.05E-02 | transcription_start_site | + | 247727 | 247727 | -1236 | 18031 | AN4170 |
| 1110 | CONTIG67 | 246243 | 246739 | 1.6  | 2.05E-02 | transcription_start_site | + | 248206 | 248206 | -1715 | 18032 | AN4170 |
| 1110 | CONTIG67 | 246243 | 246739 | 1.6  | 2.05E-02 | transcription_start_site | + | 250289 | 250289 | -3798 | 18033 | AN4171 |
| 1110 | CONTIG67 | 246243 | 246739 | 1.6  | 2.05E-02 | transcription_start_site | + | 250491 | 250491 | -4000 | 18034 | AN4171 |
| 1110 | CONTIG67 | 246243 | 246739 | 1.6  | 2.05E-02 | transcription_start_site | + | 250688 | 250688 | -4197 | 18035 | AN4171 |
| 1110 | CONTIG67 | 246243 | 246739 | 1.6  | 2.05E-02 | transcription_start_site | + | 250831 | 250831 | -4340 | 18036 | AN4171 |
| 1910 | CONTIG67 | 249913 | 250257 | 1    | 1.38E-01 | transcription_start_site | + | 250289 | 250289 | -204  | 18033 | AN4171 |
| 1910 | CONTIG67 | 249913 | 250257 | 1    | 1.38E-01 | transcription_start_site | + | 250491 | 250491 | -406  | 18034 | AN4171 |
| 1910 | CONTIG67 | 249913 | 250257 | 1    | 1.38E-01 | transcription_start_site | + | 250688 | 250688 | -603  | 18035 | AN4171 |
| 1910 | CONTIG67 | 249913 | 250257 | 1    | 1.38E-01 | transcription_start_site | + | 250831 | 250831 | -746  | 18036 | AN4171 |
| 1500 | CONTIG68 | 50638  | 51074  | 1.27 | 1.61E-02 | transcription_start_site | - | 50236  | 50236  | -620  | 18080 | AN4187 |
| 1500 | CONTIG68 | 50638  | 51074  | 1.27 | 1.61E-02 | transcription_start_site | - | 50173  | 50173  | -683  | 18081 | AN4187 |
| 1500 | CONTIG68 | 50638  | 51074  | 1.27 | 1.61E-02 | transcription_start_site | - | 50083  | 50083  | -773  | 18082 | AN4187 |
| 1500 | CONTIG68 | 50638  | 51074  | 1.27 | 1.61E-02 | transcription_start_site | + | 52299  | 52299  | -1443 | 18084 | AN4188 |
| 1500 | CONTIG68 | 50638  | 51074  | 1.27 | 1.61E-02 | transcription_start_site | + | 53867  | 53867  | -3011 | 18085 | AN4188 |
| 1500 | CONTIG68 | 50638  | 51074  | 1.27 | 1.61E-02 | transcription_start_site | + | 54074  | 54074  | -3218 | 18086 | AN4188 |
| 1853 | CONTIG68 | 64812  | 65166  | 1.04 | 7.66E-02 | transcription_start_site | + | 64537  | 64537  | 452   | 18096 | AN4191 |
| 1853 | CONTIG68 | 64812  | 65166  | 1.04 | 7.66E-02 | transcription_start_site | + | 64328  | 64328  | 661   | 18095 | AN4191 |
| 1853 | CONTIG68 | 64812  | 65166  | 1.04 | 7.66E-02 | transcription_start_site | + | 64116  | 64116  | 873   | 18094 | AN4191 |
| 1853 | CONTIG68 | 64812  | 65166  | 1.04 | 7.66E-02 | transcription_start_site | + | 65956  | 65956  | -967  | 18097 | AN4192 |
| 1853 | CONTIG68 | 64812  | 65166  | 1.04 | 7.66E-02 | transcription_start_site | + | 66497  | 66497  | -1508 | 18098 | AN4192 |
| 1853 | CONTIG68 | 64812  | 65166  | 1.04 | 7.66E-02 | transcription_start_site | + | 67711  | 67711  | -2722 | 18099 | AN4192 |
| 2051 | CONTIG68 | 86334  | 86753  | 0.91 | 1.22E-01 | transcription_start_site | - | 83061  | 83061  | -3482 | 18112 | AN4196 |
| 2051 | CONTIG68 | 86334  | 86753  | 0.91 | 1.22E-01 | transcription_start_site | - | 82977  | 82977  | -3566 | 18113 | AN4196 |



|               |        |        |      |          |                          |   |        |        |       |       |        |
|---------------|--------|--------|------|----------|--------------------------|---|--------|--------|-------|-------|--------|
| 2051 CONTIG68 | 86334  | 86753  | 0.91 | 1.22E-01 | transcription_start_site | + | 86252  | 86252  | 291   | 18119 | AN4197 |
| 2051 CONTIG68 | 86334  | 86753  | 0.91 | 1.22E-01 | transcription_start_site | + | 85973  | 85973  | 570   | 18118 | AN4197 |
| 2051 CONTIG68 | 86334  | 86753  | 0.91 | 1.22E-01 | transcription_start_site | + | 85530  | 85530  | 1013  | 18117 | AN4197 |
| 1227 CONTIG68 | 92868  | 93289  | 1.5  | 1.37E-02 | transcription_start_site | - | 88406  | 88406  | -4672 | 18120 | AN4198 |
| 1227 CONTIG68 | 92868  | 93289  | 1.5  | 1.37E-02 | transcription_start_site | - | 87933  | 87933  | -5145 | 18121 | AN4198 |
| 2051 CONTIG68 | 86334  | 86753  | 0.91 | 1.22E-01 | transcription_start_site | - | 87248  | 87248  | 704   | 18124 | AN4198 |
| 2051 CONTIG68 | 86334  | 86753  | 0.91 | 1.22E-01 | transcription_start_site | - | 87515  | 87515  | 971   | 18123 | AN4198 |
| 2051 CONTIG68 | 86334  | 86753  | 0.91 | 1.22E-01 | transcription_start_site | - | 87637  | 87637  | 1093  | 18122 | AN4198 |
| 1227 CONTIG68 | 92868  | 93289  | 1.5  | 1.37E-02 | transcription_start_site | + | 94267  | 94267  | -1188 | 18125 | AN4199 |
| 2216 CONTIG68 | 108755 | 109551 | 0.78 | 1.97E-01 | transcription_start_site | - | 106827 | 106827 | -2326 | 18126 | AN4201 |
| 2216 CONTIG68 | 108755 | 109551 | 0.78 | 1.97E-01 | transcription_start_site | - | 106625 | 106625 | -2528 | 18127 | AN4201 |
| 2216 CONTIG68 | 108755 | 109551 | 0.78 | 1.97E-01 | transcription_start_site | - | 106338 | 106338 | -2815 | 18128 | AN4201 |
| 2216 CONTIG68 | 108755 | 109551 | 0.78 | 1.97E-01 | transcription_start_site | - | 105833 | 105833 | -3320 | 18129 | AN4201 |
| 2216 CONTIG68 | 108755 | 109551 | 0.78 | 1.97E-01 | transcription_start_site | - | 105145 | 105145 | -4008 | 18130 | AN4201 |
| 2216 CONTIG68 | 108755 | 109551 | 0.78 | 1.97E-01 | transcription_start_site | - | 109117 | 109117 | -36   | 18131 | AN4202 |
| 2216 CONTIG68 | 108755 | 109551 | 0.78 | 1.97E-01 | transcription_start_site | - | 108995 | 108995 | -158  | 18132 | AN4202 |
| 2216 CONTIG68 | 108755 | 109551 | 0.78 | 1.97E-01 | transcription_start_site | - | 108661 | 108661 | -492  | 18133 | AN4202 |
| 2216 CONTIG68 | 108755 | 109551 | 0.78 | 1.97E-01 | transcription_start_site | - | 108272 | 108272 | -881  | 18134 | AN4202 |
| 453 CONTIG68  | 122032 | 122467 | 2.38 | 0.00E+00 | transcription_start_site | + | 121654 | 121654 | 595   | 18140 | AN4206 |
| 1060 CONTIG68 | 119627 | 119916 | 1.66 | 7.70E-03 | transcription_start_site | + | 121654 | 121654 | -1882 | 18140 | AN4206 |
| 1638 CONTIG68 | 127204 | 127628 | 1.18 | 4.78E-02 | transcription_start_site | - | 126954 | 126954 | -462  | 18141 | AN4207 |
| 1638 CONTIG68 | 127204 | 127628 | 1.18 | 4.78E-02 | transcription_start_site | - | 126847 | 126847 | -569  | 18142 | AN4207 |
| 1638 CONTIG68 | 127204 | 127628 | 1.18 | 4.78E-02 | transcription_start_site | - | 126656 | 126656 | -760  | 18143 | AN4207 |
| 1638 CONTIG68 | 127204 | 127628 | 1.18 | 4.78E-02 | transcription_start_site | - | 126411 | 126411 | -1005 | 18144 | AN4207 |
| 1638 CONTIG68 | 127204 | 127628 | 1.18 | 4.78E-02 | transcription_start_site | - | 124254 | 124254 | -3162 | 18145 | AN4207 |
| 1638 CONTIG68 | 127204 | 127628 | 1.18 | 4.78E-02 | transcription_start_site | + | 127767 | 127767 | -351  | 18146 | AN4208 |
| 1638 CONTIG68 | 127204 | 127628 | 1.18 | 4.78E-02 | transcription_start_site | + | 127954 | 127954 | -538  | 18147 | AN4208 |
| 1638 CONTIG68 | 127204 | 127628 | 1.18 | 4.78E-02 | transcription_start_site | + | 128450 | 128450 | -1034 | 18148 | AN4208 |
| 1638 CONTIG68 | 127204 | 127628 | 1.18 | 4.78E-02 | transcription_start_site | + | 129208 | 129208 | -1792 | 18149 | AN4208 |
| 1638 CONTIG68 | 127204 | 127628 | 1.18 | 4.78E-02 | transcription_start_site | + | 129521 | 129521 | -2105 | 18150 | AN4208 |
| 1638 CONTIG68 | 127204 | 127628 | 1.18 | 4.78E-02 | transcription_start_site | + | 129617 | 129617 | -2201 | 18151 | AN4208 |
| 870 CONTIG68  | 138312 | 138726 | 1.86 | 1.09E-03 | transcription_start_site | - | 137126 | 137126 | -1393 | 18156 | AN4210 |
| 870 CONTIG68  | 138312 | 138726 | 1.86 | 1.09E-03 | transcription_start_site | - | 136811 | 136811 | -1708 | 18157 | AN4210 |
| 870 CONTIG68  | 138312 | 138726 | 1.86 | 1.09E-03 | transcription_start_site | - | 136647 | 136647 | -1872 | 18158 | AN4210 |
| 870 CONTIG68  | 138312 | 138726 | 1.86 | 1.09E-03 | transcription_start_site | - | 133797 | 133797 | -4722 | 18159 | AN4210 |
| 2217 CONTIG68 | 139212 | 139793 | 0.78 | 1.97E-01 | transcription_start_site | - | 137126 | 137126 | -2376 | 18156 | AN4210 |
| 2217 CONTIG68 | 139212 | 139793 | 0.78 | 1.97E-01 | transcription_start_site | - | 136811 | 136811 | -2691 | 18157 | AN4210 |
| 2217 CONTIG68 | 139212 | 139793 | 0.78 | 1.97E-01 | transcription_start_site | - | 136647 | 136647 | -2855 | 18158 | AN4210 |
| 870 CONTIG68  | 138312 | 138726 | 1.86 | 1.09E-03 | transcription_start_site | + | 139399 | 139399 | -880  | 18160 | AN4211 |
| 870 CONTIG68  | 138312 | 138726 | 1.86 | 1.09E-03 | transcription_start_site | + | 139763 | 139763 | -1244 | 18161 | AN4211 |
| 870 CONTIG68  | 138312 | 138726 | 1.86 | 1.09E-03 | transcription_start_site | + | 141660 | 141660 | -3141 | 18162 | AN4211 |
| 870 CONTIG68  | 138312 | 138726 | 1.86 | 1.09E-03 | transcription_start_site | + | 142185 | 142185 | -3666 | 18163 | AN4211 |
| 2217 CONTIG68 | 139212 | 139793 | 0.78 | 1.97E-01 | transcription_start_site | + | 139399 | 139399 | 103   | 18160 | AN4211 |
| 2217 CONTIG68 | 139212 | 139793 | 0.78 | 1.97E-01 | transcription_start_site | + | 139763 | 139763 | -260  | 18161 | AN4211 |
| 2217 CONTIG68 | 139212 | 139793 | 0.78 | 1.97E-01 | transcription_start_site | + | 141660 | 141660 | -2157 | 18162 | AN4211 |
| 2217 CONTIG68 | 139212 | 139793 | 0.78 | 1.97E-01 | transcription_start_site | + | 142185 | 142185 | -2682 | 18163 | AN4211 |
| 1022 CONTIG68 | 149636 | 150125 | 1.7  | 7.08E-03 | transcription_start_site | - | 145786 | 145786 | -4094 | 18164 | AN4212 |
| 1022 CONTIG68 | 149636 | 150125 | 1.7  | 7.08E-03 | transcription_start_site | - | 145398 | 145398 | -4482 | 18165 | AN4212 |
| 1022 CONTIG68 | 149636 | 150125 | 1.7  | 7.08E-03 | transcription_start_site | - | 145256 | 145256 | -4624 | 18166 | AN4212 |
| 1022 CONTIG68 | 149636 | 150125 | 1.7  | 7.08E-03 | transcription_start_site | + | 150378 | 150378 | -497  | 18171 | AN4214 |
| 1022 CONTIG68 | 149636 | 150125 | 1.7  | 7.08E-03 | transcription_start_site | + | 150558 | 150558 | -677  | 18172 | AN4214 |
| 1022 CONTIG68 | 149636 | 150125 | 1.7  | 7.08E-03 | transcription_start_site | + | 152754 | 152754 | -2873 | 18173 | AN4215 |
| 1022 CONTIG68 | 149636 | 150125 | 1.7  | 7.08E-03 | transcription_start_site | + | 152870 | 152870 | -2989 | 18174 | AN4215 |
| 1022 CONTIG68 | 149636 | 150125 | 1.7  | 7.08E-03 | transcription_start_site | + | 153051 | 153051 | -3170 | 18175 | AN4215 |
| 493 CONTIG68  | 162013 | 162367 | 2.32 | 0.00E+00 | transcription_start_site | - | 161800 | 161800 | -390  | 18180 | AN4218 |
| 493 CONTIG68  | 162013 | 162367 | 2.32 | 0.00E+00 | transcription_start_site | - | 161734 | 161734 | -456  | 18181 | AN4218 |
| 493 CONTIG68  | 162013 | 162367 | 2.32 | 0.00E+00 | transcription_start_site | - | 161611 | 161611 | -579  | 18182 | AN4218 |

|      |          |        |        |      |          |                          |   |        |        |       |       |        |
|------|----------|--------|--------|------|----------|--------------------------|---|--------|--------|-------|-------|--------|
| 493  | CONTIG68 | 162013 | 162367 | 2.32 | 0.00E+00 | transcription_start_site | - | 161361 | 161361 | -829  | 18183 | AN4218 |
| 2284 | CONTIG68 | 162763 | 164019 | 0.69 | 1.64E-01 | transcription_start_site | - | 161800 | 161800 | -1591 | 18180 | AN4218 |
| 2284 | CONTIG68 | 162763 | 164019 | 0.69 | 1.64E-01 | transcription_start_site | - | 161734 | 161734 | -1657 | 18181 | AN4218 |
| 2284 | CONTIG68 | 162763 | 164019 | 0.69 | 1.64E-01 | transcription_start_site | - | 161611 | 161611 | -1780 | 18182 | AN4218 |
| 2284 | CONTIG68 | 162763 | 164019 | 0.69 | 1.64E-01 | transcription_start_site | - | 161361 | 161361 | -2030 | 18183 | AN4218 |
| 493  | CONTIG68 | 162013 | 162367 | 2.32 | 0.00E+00 | transcription_start_site | - | 162735 | 162735 | 545   | 18187 | AN4219 |
| 493  | CONTIG68 | 162013 | 162367 | 2.32 | 0.00E+00 | transcription_start_site | - | 163118 | 163118 | 928   | 18186 | AN4219 |
| 1854 | CONTIG68 | 168393 | 168667 | 1.04 | 7.66E-02 | transcription_start_site | - | 163470 | 163470 | -5060 | 18184 | AN4219 |
| 1854 | CONTIG68 | 168393 | 168667 | 1.04 | 7.66E-02 | transcription_start_site | - | 163398 | 163398 | -5132 | 18185 | AN4219 |
| 2284 | CONTIG68 | 162763 | 164019 | 0.69 | 1.64E-01 | transcription_start_site | - | 163398 | 163398 | 7     | 18185 | AN4219 |
| 2284 | CONTIG68 | 162763 | 164019 | 0.69 | 1.64E-01 | transcription_start_site | - | 163470 | 163470 | 79    | 18184 | AN4219 |
| 2284 | CONTIG68 | 162763 | 164019 | 0.69 | 1.64E-01 | transcription_start_site | - | 163118 | 163118 | -273  | 18186 | AN4219 |
| 2284 | CONTIG68 | 162763 | 164019 | 0.69 | 1.64E-01 | transcription_start_site | - | 162735 | 162735 | -656  | 18187 | AN4219 |
| 493  | CONTIG68 | 162013 | 162367 | 2.32 | 0.00E+00 | transcription_start_site | + | 163801 | 163801 | -1611 | 18188 | AN4220 |
| 493  | CONTIG68 | 162013 | 162367 | 2.32 | 0.00E+00 | transcription_start_site | + | 163992 | 163992 | -1802 | 18189 | AN4220 |
| 493  | CONTIG68 | 162013 | 162367 | 2.32 | 0.00E+00 | transcription_start_site | + | 164071 | 164071 | -1881 | 18190 | AN4220 |
| 493  | CONTIG68 | 162013 | 162367 | 2.32 | 0.00E+00 | transcription_start_site | + | 164449 | 164449 | -2259 | 18191 | AN4220 |
| 2284 | CONTIG68 | 162763 | 164019 | 0.69 | 1.64E-01 | transcription_start_site | + | 163801 | 163801 | -410  | 18188 | AN4220 |
| 2284 | CONTIG68 | 162763 | 164019 | 0.69 | 1.64E-01 | transcription_start_site | + | 163992 | 163992 | -601  | 18189 | AN4220 |
| 2284 | CONTIG68 | 162763 | 164019 | 0.69 | 1.64E-01 | transcription_start_site | + | 164071 | 164071 | -680  | 18190 | AN4220 |
| 2284 | CONTIG68 | 162763 | 164019 | 0.69 | 1.64E-01 | transcription_start_site | + | 164449 | 164449 | -1058 | 18191 | AN4220 |
| 338  | CONTIG68 | 222755 | 223419 | 2.55 | 0.00E+00 | transcription_start_site | - | 222390 | 222390 | -697  | 18235 | AN4238 |
| 338  | CONTIG68 | 222755 | 223419 | 2.55 | 0.00E+00 | transcription_start_site | - | 221934 | 221934 | -1153 | 18236 | AN4238 |
| 338  | CONTIG68 | 222755 | 223419 | 2.55 | 0.00E+00 | transcription_start_site | - | 220589 | 220589 | -2498 | 18237 | AN4238 |
| 872  | CONTIG68 | 224340 | 224839 | 1.86 | 3.37E-03 | transcription_start_site | - | 222390 | 222390 | -2199 | 18235 | AN4238 |
| 872  | CONTIG68 | 224340 | 224839 | 1.86 | 3.37E-03 | transcription_start_site | - | 221934 | 221934 | -2655 | 18236 | AN4238 |
| 872  | CONTIG68 | 224340 | 224839 | 1.86 | 3.37E-03 | transcription_start_site | - | 220589 | 220589 | -4000 | 18237 | AN4238 |
| 338  | CONTIG68 | 222755 | 223419 | 2.55 | 0.00E+00 | transcription_start_site | + | 225186 | 225186 | -2099 | 18238 | AN4239 |
| 338  | CONTIG68 | 222755 | 223419 | 2.55 | 0.00E+00 | transcription_start_site | + | 225345 | 225345 | -2258 | 18239 | AN4239 |
| 338  | CONTIG68 | 222755 | 223419 | 2.55 | 0.00E+00 | transcription_start_site | + | 226542 | 226542 | -3455 | 18240 | AN4239 |
| 872  | CONTIG68 | 224340 | 224839 | 1.86 | 3.37E-03 | transcription_start_site | + | 225186 | 225186 | -596  | 18238 | AN4239 |
| 872  | CONTIG68 | 224340 | 224839 | 1.86 | 3.37E-03 | transcription_start_site | + | 225345 | 225345 | -755  | 18239 | AN4239 |
| 872  | CONTIG68 | 224340 | 224839 | 1.86 | 3.37E-03 | transcription_start_site | + | 226542 | 226542 | -1952 | 18240 | AN4239 |
| 1261 | CONTIG68 | 232878 | 233302 | 1.47 | 7.02E-03 | transcription_start_site | - | 228658 | 228658 | -4432 | 18241 | AN4240 |
| 1261 | CONTIG68 | 232878 | 233302 | 1.47 | 7.02E-03 | transcription_start_site | - | 228425 | 228425 | -4665 | 18242 | AN4240 |
| 1261 | CONTIG68 | 232878 | 233302 | 1.47 | 7.02E-03 | transcription_start_site | - | 228168 | 228168 | -4922 | 18243 | AN4240 |
| 1261 | CONTIG68 | 232878 | 233302 | 1.47 | 7.02E-03 | transcription_start_site | - | 231245 | 231245 | -1845 | 18244 | AN4241 |
| 1261 | CONTIG68 | 232878 | 233302 | 1.47 | 7.02E-03 | transcription_start_site | - | 230936 | 230936 | -2154 | 18245 | AN4241 |
| 1261 | CONTIG68 | 232878 | 233302 | 1.47 | 7.02E-03 | transcription_start_site | - | 230604 | 230604 | -2486 | 18246 | AN4241 |
| 1261 | CONTIG68 | 232878 | 233302 | 1.47 | 7.02E-03 | transcription_start_site | + | 232197 | 232197 | 893   | 18248 | AN4242 |
| 1261 | CONTIG68 | 232878 | 233302 | 1.47 | 7.02E-03 | transcription_start_site | + | 234177 | 234177 | -1087 | 18249 | AN4243 |
| 1261 | CONTIG68 | 232878 | 233302 | 1.47 | 7.02E-03 | transcription_start_site | + | 234756 | 234756 | -1666 | 18250 | AN4243 |
| 1261 | CONTIG68 | 232878 | 233302 | 1.47 | 7.02E-03 | transcription_start_site | + | 235426 | 235426 | -2336 | 18251 | AN4243 |
| 1261 | CONTIG68 | 232878 | 233302 | 1.47 | 7.02E-03 | transcription_start_site | + | 236036 | 236036 | -2946 | 18252 | AN4243 |
| 1261 | CONTIG68 | 232878 | 233302 | 1.47 | 7.02E-03 | transcription_start_site | + | 238166 | 238166 | -5076 | 18255 | AN4245 |
| 1341 | CONTIG68 | 246230 | 246669 | 1.4  | 2.05E-02 | transcription_start_site | - | 246194 | 246194 | -255  | 18260 | AN4247 |
| 1341 | CONTIG68 | 246230 | 246669 | 1.4  | 2.05E-02 | transcription_start_site | - | 246057 | 246057 | -392  | 18261 | AN4247 |
| 1341 | CONTIG68 | 246230 | 246669 | 1.4  | 2.05E-02 | transcription_start_site | - | 244478 | 244478 | -1971 | 18262 | AN4247 |
| 1341 | CONTIG68 | 246230 | 246669 | 1.4  | 2.05E-02 | transcription_start_site | + | 249283 | 249283 | -2833 | 18266 | AN4249 |
| 1341 | CONTIG68 | 246230 | 246669 | 1.4  | 2.05E-02 | transcription_start_site | + | 249586 | 249586 | -3136 | 18267 | AN4249 |
| 1341 | CONTIG68 | 246230 | 246669 | 1.4  | 2.05E-02 | transcription_start_site | + | 250261 | 250261 | -3811 | 18268 | AN4249 |
| 1341 | CONTIG68 | 246230 | 246669 | 1.4  | 2.05E-02 | transcription_start_site | + | 250317 | 250317 | -3867 | 18269 | AN4249 |
| 682  | CONTIG69 | 9455   | 9980   | 2.07 | 3.37E-03 | transcription_start_site | - | 6168   | 6168   | -3549 | 18275 | AN4251 |
| 682  | CONTIG69 | 9455   | 9980   | 2.07 | 3.37E-03 | transcription_start_site | - | 6069   | 6069   | -3648 | 18276 | AN4251 |
| 682  | CONTIG69 | 9455   | 9980   | 2.07 | 3.37E-03 | transcription_start_site | - | 5824   | 5824   | -3893 | 18277 | AN4251 |
| 682  | CONTIG69 | 9455   | 9980   | 2.07 | 3.37E-03 | transcription_start_site | - | 9256   | 9256   | -461  | 18278 | AN4252 |
| 682  | CONTIG69 | 9455   | 9980   | 2.07 | 3.37E-03 | transcription_start_site | - | 8926   | 8926   | -791  | 18279 | AN4252 |

|      |          |       |       |      |          |                          |   |       |       |       |       |        |
|------|----------|-------|-------|------|----------|--------------------------|---|-------|-------|-------|-------|--------|
| 682  | CONTIG69 | 9455  | 9980  | 2.07 | 3.37E-03 | transcription_start_site | - | 8784  | 8784  | -933  | 18280 | AN4252 |
| 309  | CONTIG69 | 15765 | 16254 | 2.61 | 0.00E+00 | transcription_start_site | - | 11387 | 11387 | -4622 | 18281 | AN4253 |
| 309  | CONTIG69 | 15765 | 16254 | 2.61 | 0.00E+00 | transcription_start_site | - | 10981 | 10981 | -5028 | 18282 | AN4253 |
| 682  | CONTIG69 | 9455  | 9980  | 2.07 | 3.37E-03 | transcription_start_site | + | 12009 | 12009 | -2291 | 18283 | AN4254 |
| 682  | CONTIG69 | 9455  | 9980  | 2.07 | 3.37E-03 | transcription_start_site | + | 12267 | 12267 | -2549 | 18284 | AN4254 |
| 682  | CONTIG69 | 9455  | 9980  | 2.07 | 3.37E-03 | transcription_start_site | + | 12365 | 12365 | -2647 | 18285 | AN4254 |
| 309  | CONTIG69 | 15765 | 16254 | 2.61 | 0.00E+00 | transcription_start_site | - | 14686 | 14686 | -1323 | 18286 | AN4255 |
| 309  | CONTIG69 | 15765 | 16254 | 2.61 | 0.00E+00 | transcription_start_site | + | 16953 | 16953 | -943  | 18287 | AN4256 |
| 309  | CONTIG69 | 15765 | 16254 | 2.61 | 0.00E+00 | transcription_start_site | + | 17217 | 17217 | -1207 | 18288 | AN4256 |
| 309  | CONTIG69 | 15765 | 16254 | 2.61 | 0.00E+00 | transcription_start_site | + | 17338 | 17338 | -1328 | 18289 | AN4256 |
| 309  | CONTIG69 | 15765 | 16254 | 2.61 | 0.00E+00 | transcription_start_site | + | 20693 | 20693 | -4683 | 18290 | AN4257 |
| 309  | CONTIG69 | 15765 | 16254 | 2.61 | 0.00E+00 | transcription_start_site | + | 20830 | 20830 | -4820 | 18291 | AN4257 |
| 309  | CONTIG69 | 15765 | 16254 | 2.61 | 0.00E+00 | transcription_start_site | + | 21040 | 21040 | -5030 | 18292 | AN4257 |
| 1942 | CONTIG69 | 19810 | 20304 | 0.98 | 8.54E-02 | transcription_start_site | + | 20693 | 20693 | -636  | 18290 | AN4257 |
| 1942 | CONTIG69 | 19810 | 20304 | 0.98 | 8.54E-02 | transcription_start_site | + | 20830 | 20830 | -773  | 18291 | AN4257 |
| 1942 | CONTIG69 | 19810 | 20304 | 0.98 | 8.54E-02 | transcription_start_site | + | 21040 | 21040 | -983  | 18292 | AN4257 |
| 1942 | CONTIG69 | 19810 | 20304 | 0.98 | 8.54E-02 | transcription_start_site | + | 24068 | 24068 | -4011 | 18293 | AN4258 |
| 1443 | CONTIG69 | 45089 | 45454 | 1.31 | 4.78E-02 | transcription_start_site | - | 44910 | 44910 | -361  | 18304 | AN4265 |
| 1443 | CONTIG69 | 45089 | 45454 | 1.31 | 4.78E-02 | transcription_start_site | - | 44810 | 44810 | -461  | 18305 | AN4265 |
| 1443 | CONTIG69 | 45089 | 45454 | 1.31 | 4.78E-02 | transcription_start_site | - | 44137 | 44137 | -1134 | 18306 | AN4265 |
| 1443 | CONTIG69 | 45089 | 45454 | 1.31 | 4.78E-02 | transcription_start_site | + | 45350 | 45350 | -78   | 18307 | AN4266 |
| 1443 | CONTIG69 | 45089 | 45454 | 1.31 | 4.78E-02 | transcription_start_site | + | 45489 | 45489 | -217  | 18308 | AN4266 |
| 1443 | CONTIG69 | 45089 | 45454 | 1.31 | 4.78E-02 | transcription_start_site | + | 45816 | 45816 | -544  | 18309 | AN4266 |
| 1290 | CONTIG69 | 68487 | 68987 | 1.45 | 3.01E-02 | transcription_start_site | - | 64832 | 64832 | -3905 | 18323 | AN4271 |
| 1290 | CONTIG69 | 68487 | 68987 | 1.45 | 3.01E-02 | transcription_start_site | - | 64712 | 64712 | -4025 | 18324 | AN4271 |
| 1290 | CONTIG69 | 68487 | 68987 | 1.45 | 3.01E-02 | transcription_start_site | - | 64128 | 64128 | -4609 | 18325 | AN4271 |
| 1290 | CONTIG69 | 68487 | 68987 | 1.45 | 3.01E-02 | transcription_start_site | - | 64016 | 64016 | -4721 | 18326 | AN4271 |
| 1290 | CONTIG69 | 68487 | 68987 | 1.45 | 3.01E-02 | transcription_start_site | - | 63856 | 63856 | -4881 | 18327 | AN4271 |
| 1290 | CONTIG69 | 68487 | 68987 | 1.45 | 3.01E-02 | transcription_start_site | + | 68531 | 68531 | 206   | 18337 | AN4272 |
| 1290 | CONTIG69 | 68487 | 68987 | 1.45 | 3.01E-02 | transcription_start_site | + | 67796 | 67796 | 941   | 18336 | AN4272 |
| 1290 | CONTIG69 | 68487 | 68987 | 1.45 | 3.01E-02 | transcription_start_site | + | 67544 | 67544 | 1193  | 18335 | AN4272 |
| 1290 | CONTIG69 | 68487 | 68987 | 1.45 | 3.01E-02 | transcription_start_site | + | 69418 | 69418 | -681  | 18338 | AN4273 |
| 1290 | CONTIG69 | 68487 | 68987 | 1.45 | 3.01E-02 | transcription_start_site | + | 70267 | 70267 | -1530 | 18339 | AN4273 |
| 1290 | CONTIG69 | 68487 | 68987 | 1.45 | 3.01E-02 | transcription_start_site | + | 72442 | 72442 | -3705 | 18340 | AN4274 |
| 1290 | CONTIG69 | 68487 | 68987 | 1.45 | 3.01E-02 | transcription_start_site | + | 72562 | 72562 | -3825 | 18341 | AN4274 |
| 1290 | CONTIG69 | 68487 | 68987 | 1.45 | 3.01E-02 | transcription_start_site | + | 72757 | 72757 | -4020 | 18342 | AN4274 |
| 1118 | CONTIG70 | 1126  | 1878  | 1.59 | 0.00E+00 | transcription_start_site | + | 1362  | 1362  | 140   | 18350 | AN4276 |
| 1118 | CONTIG70 | 1126  | 1878  | 1.59 | 0.00E+00 | transcription_start_site | + | 1879  | 1879  | -377  | 18351 | AN4276 |
| 1118 | CONTIG70 | 1126  | 1878  | 1.59 | 0.00E+00 | transcription_start_site | + | 1077  | 1077  | 425   | 18349 | AN4276 |
| 1118 | CONTIG70 | 1126  | 1878  | 1.59 | 0.00E+00 | transcription_start_site | + | 1018  | 1018  | 484   | 18348 | AN4276 |
| 1118 | CONTIG70 | 1126  | 1878  | 1.59 | 0.00E+00 | transcription_start_site | + | 2466  | 2466  | -964  | 18352 | AN4276 |
| 974  | CONTIG70 | 5781  | 6050  | 1.74 | 3.37E-03 | transcription_start_site | - | 5735  | 5735  | -180  | 18353 | AN4277 |
| 974  | CONTIG70 | 5781  | 6050  | 1.74 | 3.37E-03 | transcription_start_site | - | 5357  | 5357  | -558  | 18354 | AN4277 |
| 974  | CONTIG70 | 5781  | 6050  | 1.74 | 3.37E-03 | transcription_start_site | - | 5107  | 5107  | -808  | 18355 | AN4277 |
| 974  | CONTIG70 | 5781  | 6050  | 1.74 | 3.37E-03 | transcription_start_site | - | 4981  | 4981  | -934  | 18356 | AN4277 |
| 974  | CONTIG70 | 5781  | 6050  | 1.74 | 3.37E-03 | transcription_start_site | - | 4401  | 4401  | -1514 | 18357 | AN4277 |
| 974  | CONTIG70 | 5781  | 6050  | 1.74 | 3.37E-03 | transcription_start_site | - | 4060  | 4060  | -1855 | 18358 | AN4277 |
| 974  | CONTIG70 | 5781  | 6050  | 1.74 | 3.37E-03 | transcription_start_site | - | 3892  | 3892  | -2023 | 18359 | AN4277 |
| 1665 | CONTIG70 | 16881 | 17156 | 1.16 | 3.70E-02 | transcription_start_site | - | 12678 | 12678 | -4340 | 18360 | AN4278 |
| 1665 | CONTIG70 | 16881 | 17156 | 1.16 | 3.70E-02 | transcription_start_site | - | 12289 | 12289 | -4729 | 18361 | AN4278 |
| 1665 | CONTIG70 | 16881 | 17156 | 1.16 | 3.70E-02 | transcription_start_site | - | 12051 | 12051 | -4967 | 18362 | AN4278 |
| 1665 | CONTIG70 | 16881 | 17156 | 1.16 | 3.70E-02 | transcription_start_site | - | 16887 | 16887 | -131  | 18377 | AN4280 |
| 1665 | CONTIG70 | 16881 | 17156 | 1.16 | 3.70E-02 | transcription_start_site | - | 16701 | 16701 | -317  | 18378 | AN4280 |
| 1665 | CONTIG70 | 16881 | 17156 | 1.16 | 3.70E-02 | transcription_start_site | - | 15921 | 15921 | -1097 | 18379 | AN4280 |
| 1799 | CONTIG70 | 33762 | 34037 | 1.07 | 5.36E-02 | transcription_start_site | - | 29801 | 29801 | -4098 | 18402 | AN4285 |
| 1799 | CONTIG70 | 33762 | 34037 | 1.07 | 5.36E-02 | transcription_start_site | - | 29627 | 29627 | -4272 | 18403 | AN4285 |
| 1799 | CONTIG70 | 33762 | 34037 | 1.07 | 5.36E-02 | transcription_start_site | - | 29461 | 29461 | -4438 | 18404 | AN4285 |

|      |          |       |       |      |          |                          |   |       |       |       |       |        |
|------|----------|-------|-------|------|----------|--------------------------|---|-------|-------|-------|-------|--------|
| 1707 | CONTIG70 | 36537 | 36807 | 1.13 | 4.20E-02 | transcription_start_site | - | 33624 | 33624 | -3048 | 18410 | AN4286 |
| 1707 | CONTIG70 | 36537 | 36807 | 1.13 | 4.20E-02 | transcription_start_site | - | 33354 | 33354 | -3318 | 18411 | AN4286 |
| 1707 | CONTIG70 | 36537 | 36807 | 1.13 | 4.20E-02 | transcription_start_site | - | 32989 | 32989 | -3683 | 18412 | AN4286 |
| 1707 | CONTIG70 | 36537 | 36807 | 1.13 | 4.20E-02 | transcription_start_site | - | 32649 | 32649 | -4023 | 18413 | AN4286 |
| 1707 | CONTIG70 | 36537 | 36807 | 1.13 | 4.20E-02 | transcription_start_site | - | 32464 | 32464 | -4208 | 18414 | AN4286 |
| 1707 | CONTIG70 | 36537 | 36807 | 1.13 | 4.20E-02 | transcription_start_site | - | 32121 | 32121 | -4551 | 18415 | AN4286 |
| 1707 | CONTIG70 | 36537 | 36807 | 1.13 | 4.20E-02 | transcription_start_site | - | 31945 | 31945 | -4727 | 18416 | AN4286 |
| 1707 | CONTIG70 | 36537 | 36807 | 1.13 | 4.20E-02 | transcription_start_site | - | 31792 | 31792 | -4880 | 18417 | AN4286 |
| 1799 | CONTIG70 | 33762 | 34037 | 1.07 | 5.36E-02 | transcription_start_site | - | 33624 | 33624 | -275  | 18410 | AN4286 |
| 1799 | CONTIG70 | 33762 | 34037 | 1.07 | 5.36E-02 | transcription_start_site | - | 33354 | 33354 | -545  | 18411 | AN4286 |
| 1799 | CONTIG70 | 33762 | 34037 | 1.07 | 5.36E-02 | transcription_start_site | - | 32989 | 32989 | -910  | 18412 | AN4286 |
| 1799 | CONTIG70 | 33762 | 34037 | 1.07 | 5.36E-02 | transcription_start_site | - | 32649 | 32649 | -1250 | 18413 | AN4286 |
| 1799 | CONTIG70 | 33762 | 34037 | 1.07 | 5.36E-02 | transcription_start_site | - | 32464 | 32464 | -1435 | 18414 | AN4286 |
| 1799 | CONTIG70 | 33762 | 34037 | 1.07 | 5.36E-02 | transcription_start_site | - | 32121 | 32121 | -1778 | 18415 | AN4286 |
| 1799 | CONTIG70 | 33762 | 34037 | 1.07 | 5.36E-02 | transcription_start_site | - | 31945 | 31945 | -1954 | 18416 | AN4286 |
| 1799 | CONTIG70 | 33762 | 34037 | 1.07 | 5.36E-02 | transcription_start_site | - | 31792 | 31792 | -2107 | 18417 | AN4286 |
| 1799 | CONTIG70 | 33762 | 34037 | 1.07 | 5.36E-02 | transcription_start_site | + | 34929 | 34929 | -1029 | 18418 | AN4287 |
| 1707 | CONTIG70 | 36537 | 36807 | 1.13 | 4.20E-02 | transcription_start_site | + | 36958 | 36958 | -286  | 18419 | AN4288 |
| 1707 | CONTIG70 | 36537 | 36807 | 1.13 | 4.20E-02 | transcription_start_site | + | 37133 | 37133 | -461  | 18420 | AN4288 |
| 1707 | CONTIG70 | 36537 | 36807 | 1.13 | 4.20E-02 | transcription_start_site | + | 37213 | 37213 | -541  | 18421 | AN4288 |
| 1707 | CONTIG70 | 36537 | 36807 | 1.13 | 4.20E-02 | transcription_start_site | + | 37325 | 37325 | -653  | 18422 | AN4288 |
| 1707 | CONTIG70 | 36537 | 36807 | 1.13 | 4.20E-02 | transcription_start_site | + | 37406 | 37406 | -734  | 18423 | AN4288 |
| 1707 | CONTIG70 | 36537 | 36807 | 1.13 | 4.20E-02 | transcription_start_site | + | 37488 | 37488 | -816  | 18424 | AN4288 |
| 1707 | CONTIG70 | 36537 | 36807 | 1.13 | 4.20E-02 | transcription_start_site | + | 39421 | 39421 | -2749 | 18425 | AN4288 |
| 1799 | CONTIG70 | 33762 | 34037 | 1.07 | 5.36E-02 | transcription_start_site | + | 36958 | 36958 | -3058 | 18419 | AN4288 |
| 1799 | CONTIG70 | 33762 | 34037 | 1.07 | 5.36E-02 | transcription_start_site | + | 37133 | 37133 | -3233 | 18420 | AN4288 |
| 1799 | CONTIG70 | 33762 | 34037 | 1.07 | 5.36E-02 | transcription_start_site | + | 37213 | 37213 | -3313 | 18421 | AN4288 |
| 1799 | CONTIG70 | 33762 | 34037 | 1.07 | 5.36E-02 | transcription_start_site | + | 37325 | 37325 | -3425 | 18422 | AN4288 |
| 1799 | CONTIG70 | 33762 | 34037 | 1.07 | 5.36E-02 | transcription_start_site | + | 37406 | 37406 | -3506 | 18423 | AN4288 |
| 1799 | CONTIG70 | 33762 | 34037 | 1.07 | 5.36E-02 | transcription_start_site | + | 37488 | 37488 | -3588 | 18424 | AN4288 |
| 277  | CONTIG71 | 2102  | 2620  | 2.67 | 1.80E-02 | transcription_start_site | + | 3865  | 3865  | -1504 | 18426 | AN4289 |
| 277  | CONTIG71 | 2102  | 2620  | 2.67 | 1.80E-02 | transcription_start_site | + | 6306  | 6306  | -3945 | 18427 | AN4289 |
| 277  | CONTIG71 | 2102  | 2620  | 2.67 | 1.80E-02 | transcription_start_site | + | 6976  | 6976  | -4615 | 18428 | AN4289 |
| 241  | CONTIG72 | 9677  | 10115 | 2.73 | 2.26E-04 | transcription_start_site | - | 9347  | 9347  | -549  | 18432 | AN4291 |
| 241  | CONTIG72 | 9677  | 10115 | 2.73 | 2.26E-04 | transcription_start_site | - | 8815  | 8815  | -1081 | 18433 | AN4291 |
| 241  | CONTIG72 | 9677  | 10115 | 2.73 | 2.26E-04 | transcription_start_site | + | 10351 | 10351 | -455  | 18434 | AN4292 |
| 241  | CONTIG72 | 9677  | 10115 | 2.73 | 2.26E-04 | transcription_start_site | + | 10445 | 10445 | -549  | 18435 | AN4292 |
| 241  | CONTIG72 | 9677  | 10115 | 2.73 | 2.26E-04 | transcription_start_site | + | 10665 | 10665 | -769  | 18436 | AN4292 |
| 1347 | CONTIG73 | 2267  | 2526  | 1.4  | 3.34E-02 | transcription_start_site | + | 2672  | 2672  | -275  | 18445 | AN4295 |
| 1347 | CONTIG73 | 2267  | 2526  | 1.4  | 3.34E-02 | transcription_start_site | + | 2877  | 2877  | -480  | 18446 | AN4295 |
| 1917 | CONTIG74 | 1651  | 2169  | 0.99 | 6.74E-02 | transcription_start_site | - | 1206  | 1206  | -704  | 18447 | AN4296 |
| 1917 | CONTIG74 | 1651  | 2169  | 0.99 | 6.74E-02 | transcription_start_site | - | 1116  | 1116  | -794  | 18448 | AN4296 |
| 1917 | CONTIG74 | 1651  | 2169  | 0.99 | 6.74E-02 | transcription_start_site | - | 774   | 774   | -1136 | 18449 | AN4296 |
| 1917 | CONTIG74 | 1651  | 2169  | 0.99 | 6.74E-02 | transcription_start_site | + | 2144  | 2144  | -234  | 18450 | AN4297 |
| 1917 | CONTIG74 | 1651  | 2169  | 0.99 | 6.74E-02 | transcription_start_site | + | 2239  | 2239  | -329  | 18451 | AN4297 |
| 1917 | CONTIG74 | 1651  | 2169  | 0.99 | 6.74E-02 | transcription_start_site | + | 2476  | 2476  | -566  | 18452 | AN4297 |
| 1917 | CONTIG74 | 1651  | 2169  | 0.99 | 6.74E-02 | transcription_start_site | + | 2887  | 2887  | -977  | 18453 | AN4297 |
| 1917 | CONTIG74 | 1651  | 2169  | 0.99 | 6.74E-02 | transcription_start_site | + | 3575  | 3575  | -1665 | 18454 | AN4298 |
| 1688 | CONTIG74 | 6770  | 7404  | 1.14 | 1.83E-02 | transcription_start_site | + | 7256  | 7256  | -169  | 18455 | AN4299 |
| 1688 | CONTIG74 | 6770  | 7404  | 1.14 | 1.83E-02 | transcription_start_site | + | 7321  | 7321  | -234  | 18456 | AN4299 |
| 1688 | CONTIG74 | 6770  | 7404  | 1.14 | 1.83E-02 | transcription_start_site | + | 7676  | 7676  | -589  | 18457 | AN4299 |
| 1688 | CONTIG74 | 6770  | 7404  | 1.14 | 1.83E-02 | transcription_start_site | - | 8252  | 8252  | 1165  | 18460 | AN4300 |
| 41   | CONTIG75 | 22593 | 23077 | 3.28 | 0.00E+00 | transcription_start_site | - | 18043 | 18043 | -4792 | 18483 | AN4310 |
| 41   | CONTIG75 | 22593 | 23077 | 3.28 | 0.00E+00 | transcription_start_site | - | 17885 | 17885 | -4950 | 18484 | AN4310 |
| 41   | CONTIG75 | 22593 | 23077 | 3.28 | 0.00E+00 | transcription_start_site | - | 17627 | 17627 | -5208 | 18485 | AN4310 |
| 41   | CONTIG75 | 22593 | 23077 | 3.28 | 0.00E+00 | transcription_start_site | - | 21521 | 21521 | -1314 | 18489 | AN4311 |
| 41   | CONTIG75 | 22593 | 23077 | 3.28 | 0.00E+00 | transcription_start_site | - | 23774 | 23774 | 939   | 18492 | AN4312 |

|      |          |       |       |      |          |                          |   |       |       |       |       |        |
|------|----------|-------|-------|------|----------|--------------------------|---|-------|-------|-------|-------|--------|
| 41   | CONTIG75 | 22593 | 23077 | 3.28 | 0.00E+00 | transcription_start_site | + | 28036 | 28036 | -5201 | 18493 | AN4313 |
| 121  | CONTIG75 | 35703 | 35993 | 3.04 | 0.00E+00 | transcription_start_site | - | 34069 | 34069 | -1779 | 18497 | AN4314 |
| 121  | CONTIG75 | 35703 | 35993 | 3.04 | 0.00E+00 | transcription_start_site | - | 33880 | 33880 | -1968 | 18498 | AN4314 |
| 1779 | CONTIG75 | 36769 | 37339 | 1.09 | 1.38E-01 | transcription_start_site | - | 34069 | 34069 | -2985 | 18497 | AN4314 |
| 1779 | CONTIG75 | 36769 | 37339 | 1.09 | 1.38E-01 | transcription_start_site | - | 33880 | 33880 | -3174 | 18498 | AN4314 |
| 1844 | CONTIG75 | 33093 | 33517 | 1.05 | 1.54E-01 | transcription_start_site | - | 33880 | 33880 | 575   | 18498 | AN4314 |
| 1844 | CONTIG75 | 33093 | 33517 | 1.05 | 1.54E-01 | transcription_start_site | - | 34069 | 34069 | 764   | 18497 | AN4314 |
| 121  | CONTIG75 | 35703 | 35993 | 3.04 | 0.00E+00 | transcription_start_site | + | 37528 | 37528 | -1680 | 18499 | AN4315 |
| 121  | CONTIG75 | 35703 | 35993 | 3.04 | 0.00E+00 | transcription_start_site | + | 37645 | 37645 | -1797 | 18500 | AN4315 |
| 121  | CONTIG75 | 35703 | 35993 | 3.04 | 0.00E+00 | transcription_start_site | + | 38416 | 38416 | -2568 | 18501 | AN4315 |
| 121  | CONTIG75 | 35703 | 35993 | 3.04 | 0.00E+00 | transcription_start_site | + | 38544 | 38544 | -2696 | 18502 | AN4315 |
| 121  | CONTIG75 | 35703 | 35993 | 3.04 | 0.00E+00 | transcription_start_site | + | 38894 | 38894 | -3046 | 18503 | AN4315 |
| 121  | CONTIG75 | 35703 | 35993 | 3.04 | 0.00E+00 | transcription_start_site | + | 39119 | 39119 | -3271 | 18504 | AN4315 |
| 121  | CONTIG75 | 35703 | 35993 | 3.04 | 0.00E+00 | transcription_start_site | + | 39258 | 39258 | -3410 | 18505 | AN4315 |
| 121  | CONTIG75 | 35703 | 35993 | 3.04 | 0.00E+00 | transcription_start_site | + | 39772 | 39772 | -3924 | 18506 | AN4315 |
| 1779 | CONTIG75 | 36769 | 37339 | 1.09 | 1.38E-01 | transcription_start_site | + | 37528 | 37528 | -474  | 18499 | AN4315 |
| 1779 | CONTIG75 | 36769 | 37339 | 1.09 | 1.38E-01 | transcription_start_site | + | 37645 | 37645 | -591  | 18500 | AN4315 |
| 1779 | CONTIG75 | 36769 | 37339 | 1.09 | 1.38E-01 | transcription_start_site | + | 38416 | 38416 | -1362 | 18501 | AN4315 |
| 1779 | CONTIG75 | 36769 | 37339 | 1.09 | 1.38E-01 | transcription_start_site | + | 38544 | 38544 | -1490 | 18502 | AN4315 |
| 1779 | CONTIG75 | 36769 | 37339 | 1.09 | 1.38E-01 | transcription_start_site | + | 38894 | 38894 | -1840 | 18503 | AN4315 |
| 1779 | CONTIG75 | 36769 | 37339 | 1.09 | 1.38E-01 | transcription_start_site | + | 39119 | 39119 | -2065 | 18504 | AN4315 |
| 1779 | CONTIG75 | 36769 | 37339 | 1.09 | 1.38E-01 | transcription_start_site | + | 39258 | 39258 | -2204 | 18505 | AN4315 |
| 1779 | CONTIG75 | 36769 | 37339 | 1.09 | 1.38E-01 | transcription_start_site | + | 39772 | 39772 | -2718 | 18506 | AN4315 |
| 1844 | CONTIG75 | 33093 | 33517 | 1.05 | 1.54E-01 | transcription_start_site | + | 37528 | 37528 | -4223 | 18499 | AN4315 |
| 1844 | CONTIG75 | 33093 | 33517 | 1.05 | 1.54E-01 | transcription_start_site | + | 37645 | 37645 | -4340 | 18500 | AN4315 |
| 1844 | CONTIG75 | 33093 | 33517 | 1.05 | 1.54E-01 | transcription_start_site | + | 38416 | 38416 | -5111 | 18501 | AN4315 |
| 413  | CONTIG75 | 68346 | 68615 | 2.43 | 1.77E-03 | transcription_start_site | + | 69057 | 69057 | -576  | 18533 | AN4324 |
| 413  | CONTIG75 | 68346 | 68615 | 2.43 | 1.77E-03 | transcription_start_site | + | 69264 | 69264 | -783  | 18534 | AN4324 |
| 1520 | CONTIG75 | 69021 | 70113 | 1.26 | 4.73E-02 | transcription_start_site | + | 69264 | 69264 | 303   | 18534 | AN4324 |
| 1520 | CONTIG75 | 69021 | 70113 | 1.26 | 4.73E-02 | transcription_start_site | + | 69057 | 69057 | 510   | 18533 | AN4324 |
| 802  | CONTIG75 | 71326 | 72079 | 1.94 | 4.22E-03 | transcription_start_site | - | 72219 | 72219 | 516   | 18539 | AN4325 |
| 802  | CONTIG75 | 71326 | 72079 | 1.94 | 4.22E-03 | transcription_start_site | - | 72328 | 72328 | 625   | 18538 | AN4325 |
| 802  | CONTIG75 | 71326 | 72079 | 1.94 | 4.22E-03 | transcription_start_site | - | 72577 | 72577 | 874   | 18537 | AN4325 |
| 802  | CONTIG75 | 71326 | 72079 | 1.94 | 4.22E-03 | transcription_start_site | - | 73051 | 73051 | 1348  | 18536 | AN4325 |
| 1323 | CONTIG75 | 84694 | 85104 | 1.42 | 5.36E-02 | transcription_start_site | - | 84276 | 84276 | -623  | 18540 | AN4328 |
| 1323 | CONTIG75 | 84694 | 85104 | 1.42 | 5.36E-02 | transcription_start_site | - | 83535 | 83535 | -1364 | 18541 | AN4328 |
| 1323 | CONTIG75 | 84694 | 85104 | 1.42 | 5.36E-02 | transcription_start_site | - | 83320 | 83320 | -1579 | 18542 | AN4328 |
| 1323 | CONTIG75 | 84694 | 85104 | 1.42 | 5.36E-02 | transcription_start_site | - | 82410 | 82410 | -2489 | 18543 | AN4328 |
| 1323 | CONTIG75 | 84694 | 85104 | 1.42 | 5.36E-02 | transcription_start_site | - | 81985 | 81985 | -2914 | 18544 | AN4328 |
| 1462 | CONTIG75 | 85444 | 85943 | 1.3  | 7.66E-02 | transcription_start_site | - | 84276 | 84276 | -1417 | 18540 | AN4328 |
| 1462 | CONTIG75 | 85444 | 85943 | 1.3  | 7.66E-02 | transcription_start_site | - | 83535 | 83535 | -2158 | 18541 | AN4328 |
| 1462 | CONTIG75 | 85444 | 85943 | 1.3  | 7.66E-02 | transcription_start_site | - | 83320 | 83320 | -2373 | 18542 | AN4328 |
| 1462 | CONTIG75 | 85444 | 85943 | 1.3  | 7.66E-02 | transcription_start_site | - | 82410 | 82410 | -3283 | 18543 | AN4328 |
| 1462 | CONTIG75 | 85444 | 85943 | 1.3  | 7.66E-02 | transcription_start_site | - | 81985 | 81985 | -3708 | 18544 | AN4328 |
| 1323 | CONTIG75 | 84694 | 85104 | 1.42 | 5.36E-02 | transcription_start_site | + | 86086 | 86086 | -1187 | 18545 | AN4329 |
| 1323 | CONTIG75 | 84694 | 85104 | 1.42 | 5.36E-02 | transcription_start_site | + | 86298 | 86298 | -1399 | 18546 | AN4329 |
| 1323 | CONTIG75 | 84694 | 85104 | 1.42 | 5.36E-02 | transcription_start_site | + | 86479 | 86479 | -1580 | 18547 | AN4329 |
| 1462 | CONTIG75 | 85444 | 85943 | 1.3  | 7.66E-02 | transcription_start_site | + | 86086 | 86086 | -392  | 18545 | AN4329 |
| 1462 | CONTIG75 | 85444 | 85943 | 1.3  | 7.66E-02 | transcription_start_site | + | 86298 | 86298 | -604  | 18546 | AN4329 |
| 1462 | CONTIG75 | 85444 | 85943 | 1.3  | 7.66E-02 | transcription_start_site | + | 86479 | 86479 | -785  | 18547 | AN4329 |
| 2026 | CONTIG75 | 93235 | 93729 | 0.93 | 1.23E-01 | transcription_start_site | - | 89160 | 89160 | -4322 | 18548 | AN4330 |
| 1323 | CONTIG75 | 84694 | 85104 | 1.42 | 5.36E-02 | transcription_start_site | + | 89332 | 89332 | -4433 | 18549 | AN4331 |
| 1462 | CONTIG75 | 85444 | 85943 | 1.3  | 7.66E-02 | transcription_start_site | + | 89332 | 89332 | -3638 | 18549 | AN4331 |
| 2026 | CONTIG75 | 93235 | 93729 | 0.93 | 1.23E-01 | transcription_start_site | - | 92937 | 92937 | -545  | 18550 | AN4332 |
| 2026 | CONTIG75 | 93235 | 93729 | 0.93 | 1.23E-01 | transcription_start_site | - | 92718 | 92718 | -764  | 18551 | AN4332 |
| 2026 | CONTIG75 | 93235 | 93729 | 0.93 | 1.23E-01 | transcription_start_site | - | 92358 | 92358 | -1124 | 18552 | AN4332 |
| 2026 | CONTIG75 | 93235 | 93729 | 0.93 | 1.23E-01 | transcription_start_site | - | 92020 | 92020 | -1462 | 18553 | AN4332 |

|      |          |        |        |      |          |                          |   |        |        |       |       |        |
|------|----------|--------|--------|------|----------|--------------------------|---|--------|--------|-------|-------|--------|
| 1367 | CONTIG75 | 100520 | 100869 | 1.38 | 6.04E-02 | transcription_start_site | - | 101493 | 101493 | 798   | 18557 | AN4335 |
| 1367 | CONTIG75 | 100520 | 100869 | 1.38 | 6.04E-02 | transcription_start_site | + | 104205 | 104205 | -3510 | 18558 | AN4336 |
| 1367 | CONTIG75 | 100520 | 100869 | 1.38 | 6.04E-02 | transcription_start_site | + | 104606 | 104606 | -3911 | 18559 | AN4336 |
| 1367 | CONTIG75 | 100520 | 100869 | 1.38 | 6.04E-02 | transcription_start_site | + | 105132 | 105132 | -4437 | 18560 | AN4336 |
| 1367 | CONTIG75 | 100520 | 100869 | 1.38 | 6.04E-02 | transcription_start_site | + | 105461 | 105461 | -4766 | 18561 | AN4336 |
| 1367 | CONTIG75 | 100520 | 100869 | 1.38 | 6.04E-02 | transcription_start_site | + | 105617 | 105617 | -4922 | 18562 | AN4336 |
| 1718 | CONTIG75 | 114616 | 114895 | 1.13 | 1.22E-01 | transcription_start_site | + | 114880 | 114880 | -124  | 18582 | AN4340 |
| 1718 | CONTIG75 | 114616 | 114895 | 1.13 | 1.22E-01 | transcription_start_site | + | 115022 | 115022 | -266  | 18583 | AN4340 |
| 1718 | CONTIG75 | 114616 | 114895 | 1.13 | 1.22E-01 | transcription_start_site | + | 115265 | 115265 | -509  | 18584 | AN4340 |
| 1718 | CONTIG75 | 114616 | 114895 | 1.13 | 1.22E-01 | transcription_start_site | + | 117228 | 117228 | -2472 | 18586 | AN4342 |
| 1718 | CONTIG75 | 114616 | 114895 | 1.13 | 1.22E-01 | transcription_start_site | + | 117369 | 117369 | -2613 | 18587 | AN4342 |
| 1718 | CONTIG75 | 114616 | 114895 | 1.13 | 1.22E-01 | transcription_start_site | + | 117634 | 117634 | -2878 | 18588 | AN4342 |
| 1718 | CONTIG75 | 114616 | 114895 | 1.13 | 1.22E-01 | transcription_start_site | + | 119673 | 119673 | -4917 | 18589 | AN4343 |
| 627  | CONTIG75 | 133439 | 133703 | 2.15 | 6.24E-03 | transcription_start_site | - | 129290 | 129290 | -4281 | 18607 | AN4346 |
| 627  | CONTIG75 | 133439 | 133703 | 2.15 | 6.24E-03 | transcription_start_site | - | 129208 | 129208 | -4363 | 18608 | AN4346 |
| 627  | CONTIG75 | 133439 | 133703 | 2.15 | 6.24E-03 | transcription_start_site | - | 128548 | 128548 | -5023 | 18609 | AN4346 |
| 2028 | CONTIG75 | 134044 | 134983 | 0.93 | 1.57E-01 | transcription_start_site | - | 129290 | 129290 | -5223 | 18607 | AN4346 |
| 2028 | CONTIG75 | 134044 | 134983 | 0.93 | 1.57E-01 | transcription_start_site | - | 129208 | 129208 | -5305 | 18608 | AN4346 |
| 627  | CONTIG75 | 133439 | 133703 | 2.15 | 6.24E-03 | transcription_start_site | - | 132487 | 132487 | -1084 | 18616 | AN4348 |
| 2028 | CONTIG75 | 134044 | 134983 | 0.93 | 1.57E-01 | transcription_start_site | - | 132487 | 132487 | -2026 | 18616 | AN4348 |
| 627  | CONTIG75 | 133439 | 133703 | 2.15 | 6.24E-03 | transcription_start_site | + | 134902 | 134902 | -1331 | 18617 | AN4349 |
| 627  | CONTIG75 | 133439 | 133703 | 2.15 | 6.24E-03 | transcription_start_site | + | 135625 | 135625 | -2054 | 18618 | AN4349 |
| 627  | CONTIG75 | 133439 | 133703 | 2.15 | 6.24E-03 | transcription_start_site | + | 137988 | 137988 | -4417 | 18619 | AN4349 |
| 627  | CONTIG75 | 133439 | 133703 | 2.15 | 6.24E-03 | transcription_start_site | + | 138292 | 138292 | -4721 | 18620 | AN4349 |
| 1772 | CONTIG75 | 139279 | 139929 | 1.09 | 8.54E-02 | transcription_start_site | + | 138292 | 138292 | 1312  | 18620 | AN4349 |
| 2028 | CONTIG75 | 134044 | 134983 | 0.93 | 1.57E-01 | transcription_start_site | + | 134902 | 134902 | -388  | 18617 | AN4349 |
| 2028 | CONTIG75 | 134044 | 134983 | 0.93 | 1.57E-01 | transcription_start_site | + | 135625 | 135625 | -1111 | 18618 | AN4349 |
| 2028 | CONTIG75 | 134044 | 134983 | 0.93 | 1.57E-01 | transcription_start_site | + | 137988 | 137988 | -3474 | 18619 | AN4349 |
| 2028 | CONTIG75 | 134044 | 134983 | 0.93 | 1.57E-01 | transcription_start_site | + | 138292 | 138292 | -3778 | 18620 | AN4349 |
| 500  | CONTIG75 | 152180 | 152994 | 2.31 | 0.00E+00 | transcription_start_site | - | 150145 | 150145 | -2442 | 18621 | AN4351 |
| 500  | CONTIG75 | 152180 | 152994 | 2.31 | 0.00E+00 | transcription_start_site | - | 150088 | 150088 | -2499 | 18622 | AN4351 |
| 500  | CONTIG75 | 152180 | 152994 | 2.31 | 0.00E+00 | transcription_start_site | - | 149800 | 149800 | -2787 | 18623 | AN4351 |
| 500  | CONTIG75 | 152180 | 152994 | 2.31 | 0.00E+00 | transcription_start_site | - | 149693 | 149693 | -2894 | 18624 | AN4351 |
| 500  | CONTIG75 | 152180 | 152994 | 2.31 | 0.00E+00 | transcription_start_site | - | 148753 | 148753 | -3834 | 18625 | AN4351 |
| 500  | CONTIG75 | 152180 | 152994 | 2.31 | 0.00E+00 | transcription_start_site | - | 147725 | 147725 | -4862 | 18626 | AN4351 |
| 500  | CONTIG75 | 152180 | 152994 | 2.31 | 0.00E+00 | transcription_start_site | - | 151680 | 151680 | -907  | 18627 | AN4352 |
| 500  | CONTIG75 | 152180 | 152994 | 2.31 | 0.00E+00 | transcription_start_site | - | 151443 | 151443 | -1144 | 18628 | AN4352 |
| 500  | CONTIG75 | 152180 | 152994 | 2.31 | 0.00E+00 | transcription_start_site | - | 151338 | 151338 | -1249 | 18629 | AN4352 |
| 500  | CONTIG75 | 152180 | 152994 | 2.31 | 0.00E+00 | transcription_start_site | - | 150991 | 150991 | -1596 | 18630 | AN4352 |
| 500  | CONTIG75 | 152180 | 152994 | 2.31 | 0.00E+00 | transcription_start_site | - | 150592 | 150592 | -1995 | 18631 | AN4352 |
| 500  | CONTIG75 | 152180 | 152994 | 2.31 | 0.00E+00 | transcription_start_site | + | 153479 | 153479 | -892  | 18632 | AN4353 |
| 500  | CONTIG75 | 152180 | 152994 | 2.31 | 0.00E+00 | transcription_start_site | + | 154022 | 154022 | -1435 | 18633 | AN4353 |
| 500  | CONTIG75 | 152180 | 152994 | 2.31 | 0.00E+00 | transcription_start_site | + | 156103 | 156103 | -3516 | 18634 | AN4354 |
| 500  | CONTIG75 | 152180 | 152994 | 2.31 | 0.00E+00 | transcription_start_site | + | 156290 | 156290 | -3703 | 18635 | AN4354 |
| 500  | CONTIG75 | 152180 | 152994 | 2.31 | 0.00E+00 | transcription_start_site | + | 156814 | 156814 | -4227 | 18636 | AN4354 |
| 1026 | CONTIG75 | 165320 | 165894 | 1.7  | 2.29E-02 | transcription_start_site | - | 165344 | 165344 | -263  | 18644 | AN4357 |
| 1026 | CONTIG75 | 165320 | 165894 | 1.7  | 2.29E-02 | transcription_start_site | - | 165140 | 165140 | -467  | 18645 | AN4357 |
| 1026 | CONTIG75 | 165320 | 165894 | 1.7  | 2.29E-02 | transcription_start_site | - | 164401 | 164401 | -1206 | 18646 | AN4357 |
| 1026 | CONTIG75 | 165320 | 165894 | 1.7  | 2.29E-02 | transcription_start_site | - | 164246 | 164246 | -1361 | 18647 | AN4357 |
| 179  | CONTIG75 | 174005 | 174354 | 2.88 | 0.00E+00 | transcription_start_site | - | 169295 | 169295 | -4884 | 18648 | AN4358 |
| 179  | CONTIG75 | 174005 | 174354 | 2.88 | 0.00E+00 | transcription_start_site | - | 169189 | 169189 | -4990 | 18649 | AN4358 |
| 1026 | CONTIG75 | 165320 | 165894 | 1.7  | 2.29E-02 | transcription_start_site | + | 169738 | 169738 | -4131 | 18652 | AN4359 |
| 1026 | CONTIG75 | 165320 | 165894 | 1.7  | 2.29E-02 | transcription_start_site | + | 170094 | 170094 | -4487 | 18653 | AN4359 |
| 1026 | CONTIG75 | 165320 | 165894 | 1.7  | 2.29E-02 | transcription_start_site | + | 170366 | 170366 | -4759 | 18654 | AN4359 |
| 1026 | CONTIG75 | 165320 | 165894 | 1.7  | 2.29E-02 | transcription_start_site | + | 170476 | 170476 | -4869 | 18655 | AN4359 |
| 1026 | CONTIG75 | 165320 | 165894 | 1.7  | 2.29E-02 | transcription_start_site | + | 170770 | 170770 | -5163 | 18656 | AN4359 |
| 179  | CONTIG75 | 174005 | 174354 | 2.88 | 0.00E+00 | transcription_start_site | - | 173101 | 173101 | -1078 | 18658 | AN4360 |



|      |          |        |        |      |          |                          |   |        |        |       |       |        |
|------|----------|--------|--------|------|----------|--------------------------|---|--------|--------|-------|-------|--------|
| 179  | CONTIG75 | 174005 | 174354 | 2.88 | 0.00E+00 | transcription_start_site | + | 174673 | 174673 | -493  | 18659 | AN4361 |
| 179  | CONTIG75 | 174005 | 174354 | 2.88 | 0.00E+00 | transcription_start_site | + | 175427 | 175427 | -1247 | 18660 | AN4361 |
| 939  | CONTIG75 | 206553 | 207138 | 1.78 | 7.36E-03 | transcription_start_site | - | 206634 | 206634 | -211  | 18681 | AN4368 |
| 939  | CONTIG75 | 206553 | 207138 | 1.78 | 7.36E-03 | transcription_start_site | - | 206527 | 206527 | -318  | 18682 | AN4368 |
| 939  | CONTIG75 | 206553 | 207138 | 1.78 | 7.36E-03 | transcription_start_site | + | 208698 | 208698 | -1852 | 18683 | AN4369 |
| 1877 | CONTIG76 | 4520   | 4802   | 1.03 | 1.97E-01 | transcription_start_site | - | 1171   | 1171   | -3490 | 18684 | AN4370 |
| 1877 | CONTIG76 | 4520   | 4802   | 1.03 | 1.97E-01 | transcription_start_site | - | 243    | 243    | -4418 | 18685 | AN4370 |
| 1334 | CONTIG76 | 15238  | 15954  | 1.41 | 2.43E-02 | transcription_start_site | - | 10550  | 10550  | -5046 | 18690 | AN4373 |
| 565  | CONTIG76 | 18469  | 19553  | 2.23 | 0.00E+00 | transcription_start_site | - | 14013  | 14013  | -4998 | 18692 | AN4374 |
| 565  | CONTIG76 | 18469  | 19553  | 2.23 | 0.00E+00 | transcription_start_site | - | 13903  | 13903  | -5108 | 18693 | AN4374 |
| 565  | CONTIG76 | 18469  | 19553  | 2.23 | 0.00E+00 | transcription_start_site | - | 13471  | 13471  | -5540 | 18694 | AN4374 |
| 1334 | CONTIG76 | 15238  | 15954  | 1.41 | 2.43E-02 | transcription_start_site | - | 14013  | 14013  | -1583 | 18692 | AN4374 |
| 1334 | CONTIG76 | 15238  | 15954  | 1.41 | 2.43E-02 | transcription_start_site | - | 13903  | 13903  | -1693 | 18693 | AN4374 |
| 1334 | CONTIG76 | 15238  | 15954  | 1.41 | 2.43E-02 | transcription_start_site | - | 13471  | 13471  | -2125 | 18694 | AN4374 |
| 1334 | CONTIG76 | 15238  | 15954  | 1.41 | 2.43E-02 | transcription_start_site | - | 12953  | 12953  | -2643 | 18695 | AN4374 |
| 311  | CONTIG76 | 20569  | 20838  | 2.61 | 1.62E-03 | transcription_start_site | - | 17469  | 17469  | -3234 | 18696 | AN4375 |
| 311  | CONTIG76 | 20569  | 20838  | 2.61 | 1.62E-03 | transcription_start_site | - | 17320  | 17320  | -3383 | 18697 | AN4375 |
| 565  | CONTIG76 | 18469  | 19553  | 2.23 | 0.00E+00 | transcription_start_site | - | 17469  | 17469  | -1542 | 18696 | AN4375 |
| 565  | CONTIG76 | 18469  | 19553  | 2.23 | 0.00E+00 | transcription_start_site | - | 17320  | 17320  | -1691 | 18697 | AN4375 |
| 1015 | CONTIG76 | 21244  | 22036  | 1.71 | 3.01E-02 | transcription_start_site | - | 17469  | 17469  | -4171 | 18696 | AN4375 |
| 1015 | CONTIG76 | 21244  | 22036  | 1.71 | 3.01E-02 | transcription_start_site | - | 17320  | 17320  | -4320 | 18697 | AN4375 |
| 311  | CONTIG76 | 20569  | 20838  | 2.61 | 1.62E-03 | transcription_start_site | + | 23350  | 23350  | -2646 | 18698 | AN4376 |
| 311  | CONTIG76 | 20569  | 20838  | 2.61 | 1.62E-03 | transcription_start_site | + | 23449  | 23449  | -2745 | 18699 | AN4376 |
| 311  | CONTIG76 | 20569  | 20838  | 2.61 | 1.62E-03 | transcription_start_site | + | 23778  | 23778  | -3074 | 18700 | AN4376 |
| 407  | CONTIG76 | 22804  | 23093  | 2.44 | 3.37E-03 | transcription_start_site | + | 23350  | 23350  | -401  | 18698 | AN4376 |
| 407  | CONTIG76 | 22804  | 23093  | 2.44 | 3.37E-03 | transcription_start_site | + | 23449  | 23449  | -500  | 18699 | AN4376 |
| 407  | CONTIG76 | 22804  | 23093  | 2.44 | 3.37E-03 | transcription_start_site | + | 23778  | 23778  | -829  | 18700 | AN4376 |
| 565  | CONTIG76 | 18469  | 19553  | 2.23 | 0.00E+00 | transcription_start_site | + | 23350  | 23350  | -4339 | 18698 | AN4376 |
| 565  | CONTIG76 | 18469  | 19553  | 2.23 | 0.00E+00 | transcription_start_site | + | 23449  | 23449  | -4438 | 18699 | AN4376 |
| 565  | CONTIG76 | 18469  | 19553  | 2.23 | 0.00E+00 | transcription_start_site | + | 23778  | 23778  | -4767 | 18700 | AN4376 |
| 1015 | CONTIG76 | 21244  | 22036  | 1.71 | 3.01E-02 | transcription_start_site | + | 23350  | 23350  | -1710 | 18698 | AN4376 |
| 1015 | CONTIG76 | 21244  | 22036  | 1.71 | 3.01E-02 | transcription_start_site | + | 23449  | 23449  | -1809 | 18699 | AN4376 |
| 1015 | CONTIG76 | 21244  | 22036  | 1.71 | 3.01E-02 | transcription_start_site | + | 23778  | 23778  | -2138 | 18700 | AN4376 |
| 311  | CONTIG76 | 20569  | 20838  | 2.61 | 1.62E-03 | transcription_start_site | + | 25586  | 25586  | -4882 | 18701 | AN4377 |
| 407  | CONTIG76 | 22804  | 23093  | 2.44 | 3.37E-03 | transcription_start_site | + | 25586  | 25586  | -2637 | 18701 | AN4377 |
| 407  | CONTIG76 | 22804  | 23093  | 2.44 | 3.37E-03 | transcription_start_site | + | 26045  | 26045  | -3096 | 18702 | AN4377 |
| 407  | CONTIG76 | 22804  | 23093  | 2.44 | 3.37E-03 | transcription_start_site | + | 26336  | 26336  | -3387 | 18703 | AN4377 |
| 407  | CONTIG76 | 22804  | 23093  | 2.44 | 3.37E-03 | transcription_start_site | + | 26445  | 26445  | -3496 | 18704 | AN4377 |
| 407  | CONTIG76 | 22804  | 23093  | 2.44 | 3.37E-03 | transcription_start_site | + | 26996  | 26996  | -4047 | 18705 | AN4377 |
| 407  | CONTIG76 | 22804  | 23093  | 2.44 | 3.37E-03 | transcription_start_site | + | 27577  | 27577  | -4628 | 18706 | AN4377 |
| 1015 | CONTIG76 | 21244  | 22036  | 1.71 | 3.01E-02 | transcription_start_site | + | 25586  | 25586  | -3946 | 18701 | AN4377 |
| 1015 | CONTIG76 | 21244  | 22036  | 1.71 | 3.01E-02 | transcription_start_site | + | 26045  | 26045  | -4405 | 18702 | AN4377 |
| 1015 | CONTIG76 | 21244  | 22036  | 1.71 | 3.01E-02 | transcription_start_site | + | 26336  | 26336  | -4696 | 18703 | AN4377 |
| 1015 | CONTIG76 | 21244  | 22036  | 1.71 | 3.01E-02 | transcription_start_site | + | 26445  | 26445  | -4805 | 18704 | AN4377 |
| 1015 | CONTIG76 | 21244  | 22036  | 1.71 | 3.01E-02 | transcription_start_site | + | 26996  | 26996  | -5356 | 18705 | AN4377 |
| 807  | CONTIG76 | 35180  | 35548  | 1.93 | 1.54E-02 | transcription_start_site | - | 33154  | 33154  | -2210 | 18707 | AN4378 |
| 807  | CONTIG76 | 35180  | 35548  | 1.93 | 1.54E-02 | transcription_start_site | - | 32949  | 32949  | -2415 | 18708 | AN4378 |
| 807  | CONTIG76 | 35180  | 35548  | 1.93 | 1.54E-02 | transcription_start_site | - | 32730  | 32730  | -2634 | 18709 | AN4378 |
| 807  | CONTIG76 | 35180  | 35548  | 1.93 | 1.54E-02 | transcription_start_site | - | 32234  | 32234  | -3130 | 18710 | AN4378 |
| 1804 | CONTIG76 | 33304  | 33819  | 1.07 | 1.15E-01 | transcription_start_site | - | 33154  | 33154  | -407  | 18707 | AN4378 |
| 1804 | CONTIG76 | 33304  | 33819  | 1.07 | 1.15E-01 | transcription_start_site | - | 32949  | 32949  | -612  | 18708 | AN4378 |
| 1804 | CONTIG76 | 33304  | 33819  | 1.07 | 1.15E-01 | transcription_start_site | - | 32730  | 32730  | -831  | 18709 | AN4378 |
| 1804 | CONTIG76 | 33304  | 33819  | 1.07 | 1.15E-01 | transcription_start_site | - | 32234  | 32234  | -1327 | 18710 | AN4378 |
| 807  | CONTIG76 | 35180  | 35548  | 1.93 | 1.54E-02 | transcription_start_site | - | 35035  | 35035  | -329  | 18711 | AN4379 |
| 327  | CONTIG76 | 63543  | 64114  | 2.57 | 1.77E-03 | transcription_start_site | - | 61734  | 61734  | -2094 | 18743 | AN4389 |
| 327  | CONTIG76 | 63543  | 64114  | 2.57 | 1.77E-03 | transcription_start_site | - | 60602  | 60602  | -3226 | 18744 | AN4389 |
| 327  | CONTIG76 | 63543  | 64114  | 2.57 | 1.77E-03 | transcription_start_site | - | 60541  | 60541  | -3287 | 18745 | AN4389 |

|      |          |        |        |      |          |                          |   |        |        |       |       |        |
|------|----------|--------|--------|------|----------|--------------------------|---|--------|--------|-------|-------|--------|
| 327  | CONTIG76 | 63543  | 64114  | 2.57 | 1.77E-03 | transcription_start_site | - | 60422  | 60422  | -3406 | 18746 | AN4389 |
| 327  | CONTIG76 | 63543  | 64114  | 2.57 | 1.77E-03 | transcription_start_site | + | 65116  | 65116  | -1287 | 18747 | AN4390 |
| 327  | CONTIG76 | 63543  | 64114  | 2.57 | 1.77E-03 | transcription_start_site | + | 65239  | 65239  | -1410 | 18748 | AN4390 |
| 327  | CONTIG76 | 63543  | 64114  | 2.57 | 1.77E-03 | transcription_start_site | + | 67144  | 67144  | -3315 | 18749 | AN4391 |
| 1544 | CONTIG76 | 91282  | 91851  | 1.24 | 1.08E-01 | transcription_start_site | - | 88510  | 88510  | -3056 | 18782 | AN4400 |
| 1544 | CONTIG76 | 91282  | 91851  | 1.24 | 1.08E-01 | transcription_start_site | - | 88295  | 88295  | -3271 | 18783 | AN4400 |
| 1544 | CONTIG76 | 91282  | 91851  | 1.24 | 1.08E-01 | transcription_start_site | - | 88165  | 88165  | -3401 | 18784 | AN4400 |
| 1544 | CONTIG76 | 91282  | 91851  | 1.24 | 1.08E-01 | transcription_start_site | + | 91065  | 91065  | 501   | 18793 | AN4401 |
| 1544 | CONTIG76 | 91282  | 91851  | 1.24 | 1.08E-01 | transcription_start_site | + | 90901  | 90901  | 665   | 18792 | AN4401 |
| 1544 | CONTIG76 | 91282  | 91851  | 1.24 | 1.08E-01 | transcription_start_site | + | 91820  | 91820  | -253  | 18794 | AN4402 |
| 1544 | CONTIG76 | 91282  | 91851  | 1.24 | 1.08E-01 | transcription_start_site | + | 91971  | 91971  | -404  | 18795 | AN4402 |
| 1544 | CONTIG76 | 91282  | 91851  | 1.24 | 1.08E-01 | transcription_start_site | + | 92080  | 92080  | -513  | 18796 | AN4402 |
| 1544 | CONTIG76 | 91282  | 91851  | 1.24 | 1.08E-01 | transcription_start_site | + | 92231  | 92231  | -664  | 18797 | AN4402 |
| 1544 | CONTIG76 | 91282  | 91851  | 1.24 | 1.08E-01 | transcription_start_site | + | 92424  | 92424  | -857  | 18798 | AN4402 |
| 1544 | CONTIG76 | 91282  | 91851  | 1.24 | 1.08E-01 | transcription_start_site | + | 92990  | 92990  | -1423 | 18799 | AN4402 |
| 1544 | CONTIG76 | 91282  | 91851  | 1.24 | 1.08E-01 | transcription_start_site | + | 95152  | 95152  | -3585 | 18803 | AN4404 |
| 1544 | CONTIG76 | 91282  | 91851  | 1.24 | 1.08E-01 | transcription_start_site | + | 95248  | 95248  | -3681 | 18804 | AN4404 |
| 1544 | CONTIG76 | 91282  | 91851  | 1.24 | 1.08E-01 | transcription_start_site | + | 95457  | 95457  | -3890 | 18805 | AN4404 |
| 1544 | CONTIG76 | 91282  | 91851  | 1.24 | 1.08E-01 | transcription_start_site | + | 96095  | 96095  | -4528 | 18806 | AN4404 |
| 1544 | CONTIG76 | 91282  | 91851  | 1.24 | 1.08E-01 | transcription_start_site | + | 96417  | 96417  | -4850 | 18807 | AN4404 |
| 1544 | CONTIG76 | 91282  | 91851  | 1.24 | 1.08E-01 | transcription_start_site | + | 96628  | 96628  | -5061 | 18808 | AN4404 |
| 1544 | CONTIG76 | 91282  | 91851  | 1.24 | 1.08E-01 | transcription_start_site | + | 96765  | 96765  | -5198 | 18809 | AN4404 |
| 1089 | CONTIG76 | 101403 | 101837 | 1.63 | 3.70E-02 | transcription_start_site | - | 100615 | 100615 | -1005 | 18813 | AN4406 |
| 1089 | CONTIG76 | 101403 | 101837 | 1.63 | 3.70E-02 | transcription_start_site | - | 100514 | 100514 | -1106 | 18814 | AN4406 |
| 1089 | CONTIG76 | 101403 | 101837 | 1.63 | 3.70E-02 | transcription_start_site | - | 100381 | 100381 | -1239 | 18815 | AN4406 |
| 1089 | CONTIG76 | 101403 | 101837 | 1.63 | 3.70E-02 | transcription_start_site | - | 100304 | 100304 | -1316 | 18816 | AN4406 |
| 1089 | CONTIG76 | 101403 | 101837 | 1.63 | 3.70E-02 | transcription_start_site | - | 100188 | 100188 | -1432 | 18817 | AN4406 |
| 1089 | CONTIG76 | 101403 | 101837 | 1.63 | 3.70E-02 | transcription_start_site | - | 100024 | 100024 | -1596 | 18818 | AN4406 |
| 1089 | CONTIG76 | 101403 | 101837 | 1.63 | 3.70E-02 | transcription_start_site | - | 99853  | 99853  | -1767 | 18819 | AN4406 |
| 1089 | CONTIG76 | 101403 | 101837 | 1.63 | 3.70E-02 | transcription_start_site | - | 98991  | 98991  | -2629 | 18820 | AN4406 |
| 1089 | CONTIG76 | 101403 | 101837 | 1.63 | 3.70E-02 | transcription_start_site | + | 103434 | 103434 | -1814 | 18821 | AN4407 |
| 1089 | CONTIG76 | 101403 | 101837 | 1.63 | 3.70E-02 | transcription_start_site | + | 103779 | 103779 | -2159 | 18822 | AN4407 |
| 1089 | CONTIG76 | 101403 | 101837 | 1.63 | 3.70E-02 | transcription_start_site | + | 103930 | 103930 | -2310 | 18823 | AN4407 |
| 1089 | CONTIG76 | 101403 | 101837 | 1.63 | 3.70E-02 | transcription_start_site | + | 104161 | 104161 | -2541 | 18824 | AN4407 |
| 1089 | CONTIG76 | 101403 | 101837 | 1.63 | 3.70E-02 | transcription_start_site | + | 104386 | 104386 | -2766 | 18825 | AN4407 |
| 959  | CONTIG76 | 109054 | 109403 | 1.76 | 2.63E-02 | transcription_start_site | - | 108902 | 108902 | -326  | 18826 | AN4408 |
| 959  | CONTIG76 | 109054 | 109403 | 1.76 | 2.63E-02 | transcription_start_site | - | 108055 | 108055 | -1173 | 18827 | AN4408 |
| 959  | CONTIG76 | 109054 | 109403 | 1.76 | 2.63E-02 | transcription_start_site | - | 107051 | 107051 | -2177 | 18828 | AN4408 |
| 959  | CONTIG76 | 109054 | 109403 | 1.76 | 2.63E-02 | transcription_start_site | - | 106318 | 106318 | -2910 | 18829 | AN4408 |
| 959  | CONTIG76 | 109054 | 109403 | 1.76 | 2.63E-02 | transcription_start_site | + | 109243 | 109243 | -14   | 18830 | AN4409 |
| 959  | CONTIG76 | 109054 | 109403 | 1.76 | 2.63E-02 | transcription_start_site | + | 111323 | 111323 | -2094 | 18831 | AN4410 |
| 740  | CONTIG76 | 134405 | 134695 | 2.01 | 1.25E-02 | transcription_start_site | - | 133098 | 133098 | -1452 | 18847 | AN4418 |
| 740  | CONTIG76 | 134405 | 134695 | 2.01 | 1.25E-02 | transcription_start_site | - | 132659 | 132659 | -1891 | 18848 | AN4418 |
| 740  | CONTIG76 | 134405 | 134695 | 2.01 | 1.25E-02 | transcription_start_site | - | 131453 | 131453 | -3097 | 18849 | AN4418 |
| 770  | CONTIG76 | 136208 | 136938 | 1.97 | 9.40E-04 | transcription_start_site | - | 133098 | 133098 | -3475 | 18847 | AN4418 |
| 770  | CONTIG76 | 136208 | 136938 | 1.97 | 9.40E-04 | transcription_start_site | - | 132659 | 132659 | -3914 | 18848 | AN4418 |
| 770  | CONTIG76 | 136208 | 136938 | 1.97 | 9.40E-04 | transcription_start_site | - | 131453 | 131453 | -5120 | 18849 | AN4418 |
| 808  | CONTIG76 | 134943 | 135362 | 1.93 | 1.54E-02 | transcription_start_site | - | 133098 | 133098 | -2054 | 18847 | AN4418 |
| 808  | CONTIG76 | 134943 | 135362 | 1.93 | 1.54E-02 | transcription_start_site | - | 132659 | 132659 | -2493 | 18848 | AN4418 |
| 808  | CONTIG76 | 134943 | 135362 | 1.93 | 1.54E-02 | transcription_start_site | - | 131453 | 131453 | -3699 | 18849 | AN4418 |
| 1130 | CONTIG76 | 137629 | 138669 | 1.58 | 2.02E-03 | transcription_start_site | - | 133098 | 133098 | -5051 | 18847 | AN4418 |
| 1130 | CONTIG76 | 137629 | 138669 | 1.58 | 2.02E-03 | transcription_start_site | - | 132659 | 132659 | -5490 | 18848 | AN4418 |
| 740  | CONTIG76 | 134405 | 134695 | 2.01 | 1.25E-02 | transcription_start_site | + | 138291 | 138291 | -3741 | 18850 | AN4419 |
| 740  | CONTIG76 | 134405 | 134695 | 2.01 | 1.25E-02 | transcription_start_site | + | 138396 | 138396 | -3846 | 18851 | AN4419 |
| 740  | CONTIG76 | 134405 | 134695 | 2.01 | 1.25E-02 | transcription_start_site | + | 138696 | 138696 | -4146 | 18852 | AN4419 |
| 740  | CONTIG76 | 134405 | 134695 | 2.01 | 1.25E-02 | transcription_start_site | + | 139113 | 139113 | -4563 | 18853 | AN4419 |
| 740  | CONTIG76 | 134405 | 134695 | 2.01 | 1.25E-02 | transcription_start_site | + | 139584 | 139584 | -5034 | 18854 | AN4419 |

|      |          |        |        |      |          |                          |   |        |        |       |       |        |
|------|----------|--------|--------|------|----------|--------------------------|---|--------|--------|-------|-------|--------|
| 770  | CONTIG76 | 136208 | 136938 | 1.97 | 9.40E-04 | transcription_start_site | + | 138291 | 138291 | -1718 | 18850 | AN4419 |
| 770  | CONTIG76 | 136208 | 136938 | 1.97 | 9.40E-04 | transcription_start_site | + | 138396 | 138396 | -1823 | 18851 | AN4419 |
| 770  | CONTIG76 | 136208 | 136938 | 1.97 | 9.40E-04 | transcription_start_site | + | 138696 | 138696 | -2123 | 18852 | AN4419 |
| 770  | CONTIG76 | 136208 | 136938 | 1.97 | 9.40E-04 | transcription_start_site | + | 139113 | 139113 | -2540 | 18853 | AN4419 |
| 770  | CONTIG76 | 136208 | 136938 | 1.97 | 9.40E-04 | transcription_start_site | + | 139584 | 139584 | -3011 | 18854 | AN4419 |
| 808  | CONTIG76 | 134943 | 135362 | 1.93 | 1.54E-02 | transcription_start_site | + | 138291 | 138291 | -3138 | 18850 | AN4419 |
| 808  | CONTIG76 | 134943 | 135362 | 1.93 | 1.54E-02 | transcription_start_site | + | 138396 | 138396 | -3243 | 18851 | AN4419 |
| 808  | CONTIG76 | 134943 | 135362 | 1.93 | 1.54E-02 | transcription_start_site | + | 138696 | 138696 | -3543 | 18852 | AN4419 |
| 808  | CONTIG76 | 134943 | 135362 | 1.93 | 1.54E-02 | transcription_start_site | + | 139113 | 139113 | -3960 | 18853 | AN4419 |
| 808  | CONTIG76 | 134943 | 135362 | 1.93 | 1.54E-02 | transcription_start_site | + | 139584 | 139584 | -4431 | 18854 | AN4419 |
| 1130 | CONTIG76 | 137629 | 138669 | 1.58 | 2.02E-03 | transcription_start_site | + | 138291 | 138291 | -142  | 18850 | AN4419 |
| 1130 | CONTIG76 | 137629 | 138669 | 1.58 | 2.02E-03 | transcription_start_site | + | 138396 | 138396 | -247  | 18851 | AN4419 |
| 1130 | CONTIG76 | 137629 | 138669 | 1.58 | 2.02E-03 | transcription_start_site | + | 138696 | 138696 | -547  | 18852 | AN4419 |
| 1130 | CONTIG76 | 137629 | 138669 | 1.58 | 2.02E-03 | transcription_start_site | + | 139113 | 139113 | -964  | 18853 | AN4419 |
| 1130 | CONTIG76 | 137629 | 138669 | 1.58 | 2.02E-03 | transcription_start_site | + | 139584 | 139584 | -1435 | 18854 | AN4419 |
| 1185 | CONTIG76 | 140404 | 140920 | 1.54 | 2.30E-02 | transcription_start_site | + | 139584 | 139584 | 1078  | 18854 | AN4419 |
| 1545 | CONTIG76 | 146789 | 147150 | 1.24 | 1.08E-01 | transcription_start_site | + | 147077 | 147077 | -107  | 18855 | AN4421 |
| 1545 | CONTIG76 | 146789 | 147150 | 1.24 | 1.08E-01 | transcription_start_site | + | 147272 | 147272 | -302  | 18856 | AN4421 |
| 1545 | CONTIG76 | 146789 | 147150 | 1.24 | 1.08E-01 | transcription_start_site | + | 147474 | 147474 | -504  | 18857 | AN4421 |
| 1545 | CONTIG76 | 146789 | 147150 | 1.24 | 1.08E-01 | transcription_start_site | + | 148631 | 148631 | -1661 | 18858 | AN4421 |
| 1047 | CONTIG76 | 150914 | 151573 | 1.67 | 1.61E-02 | transcription_start_site | - | 150357 | 150357 | -886  | 18859 | AN4422 |
| 2250 | CONTIG77 | 1051   | 1570   | 0.75 | 1.97E-01 | transcription_start_site | - | 1886   | 1886   | 575   | 18866 | AN4424 |
| 1956 | CONTIG77 | 11     | 425    | 0.97 | 4.73E-02 | transcription_start_site | + | 4451   | 4451   | -4233 | 18867 | AN4425 |
| 1956 | CONTIG77 | 11     | 425    | 0.97 | 4.73E-02 | transcription_start_site | + | 4532   | 4532   | -4314 | 18868 | AN4425 |
| 1956 | CONTIG77 | 11     | 425    | 0.97 | 4.73E-02 | transcription_start_site | + | 4803   | 4803   | -4585 | 18869 | AN4425 |
| 1956 | CONTIG77 | 11     | 425    | 0.97 | 4.73E-02 | transcription_start_site | + | 5323   | 5323   | -5105 | 18870 | AN4425 |
| 2250 | CONTIG77 | 1051   | 1570   | 0.75 | 1.97E-01 | transcription_start_site | + | 4451   | 4451   | -3140 | 18867 | AN4425 |
| 2250 | CONTIG77 | 1051   | 1570   | 0.75 | 1.97E-01 | transcription_start_site | + | 4532   | 4532   | -3221 | 18868 | AN4425 |
| 2250 | CONTIG77 | 1051   | 1570   | 0.75 | 1.97E-01 | transcription_start_site | + | 4803   | 4803   | -3492 | 18869 | AN4425 |
| 2250 | CONTIG77 | 1051   | 1570   | 0.75 | 1.97E-01 | transcription_start_site | + | 5323   | 5323   | -4012 | 18870 | AN4425 |
| 2250 | CONTIG77 | 1051   | 1570   | 0.75 | 1.97E-01 | transcription_start_site | + | 5567   | 5567   | -4256 | 18871 | AN4425 |
| 2250 | CONTIG77 | 1051   | 1570   | 0.75 | 1.97E-01 | transcription_start_site | + | 6551   | 6551   | -5240 | 18872 | AN4426 |
| 2112 | CONTIG77 | 17715  | 18139  | 0.87 | 1.22E-01 | transcription_start_site | - | 17701  | 17701  | -226  | 18891 | AN4430 |
| 2112 | CONTIG77 | 17715  | 18139  | 0.87 | 1.22E-01 | transcription_start_site | - | 16839  | 16839  | -1088 | 18892 | AN4430 |
| 2112 | CONTIG77 | 17715  | 18139  | 0.87 | 1.22E-01 | transcription_start_site | + | 18240  | 18240  | -313  | 18893 | AN4431 |
| 2112 | CONTIG77 | 17715  | 18139  | 0.87 | 1.22E-01 | transcription_start_site | + | 18504  | 18504  | -577  | 18894 | AN4431 |
| 2112 | CONTIG77 | 17715  | 18139  | 0.87 | 1.22E-01 | transcription_start_site | + | 18651  | 18651  | -724  | 18895 | AN4431 |
| 2112 | CONTIG77 | 17715  | 18139  | 0.87 | 1.22E-01 | transcription_start_site | + | 18957  | 18957  | -1030 | 18896 | AN4431 |
| 2112 | CONTIG77 | 17715  | 18139  | 0.87 | 1.22E-01 | transcription_start_site | + | 19054  | 19054  | -1127 | 18897 | AN4431 |
| 2112 | CONTIG77 | 17715  | 18139  | 0.87 | 1.22E-01 | transcription_start_site | + | 19166  | 19166  | -1239 | 18898 | AN4431 |
| 2112 | CONTIG77 | 17715  | 18139  | 0.87 | 1.22E-01 | transcription_start_site | + | 19381  | 19381  | -1454 | 18899 | AN4431 |
| 2112 | CONTIG77 | 17715  | 18139  | 0.87 | 1.22E-01 | transcription_start_site | + | 19637  | 19637  | -1710 | 18900 | AN4431 |
| 2112 | CONTIG77 | 17715  | 18139  | 0.87 | 1.22E-01 | transcription_start_site | + | 20196  | 20196  | -2269 | 18901 | AN4431 |
| 1954 | CONTIG77 | 43971  | 44695  | 0.97 | 3.47E-02 | transcription_start_site | - | 43049  | 43049  | -1284 | 18919 | AN4438 |
| 1954 | CONTIG77 | 43971  | 44695  | 0.97 | 3.47E-02 | transcription_start_site | - | 41861  | 41861  | -2472 | 18920 | AN4438 |
| 1954 | CONTIG77 | 43971  | 44695  | 0.97 | 3.47E-02 | transcription_start_site | - | 41592  | 41592  | -2741 | 18921 | AN4438 |
| 1954 | CONTIG77 | 43971  | 44695  | 0.97 | 3.47E-02 | transcription_start_site | + | 44534  | 44534  | -201  | 18922 | AN4439 |
| 1954 | CONTIG77 | 43971  | 44695  | 0.97 | 3.47E-02 | transcription_start_site | + | 46473  | 46473  | -2140 | 18925 | AN4441 |
| 1954 | CONTIG77 | 43971  | 44695  | 0.97 | 3.47E-02 | transcription_start_site | + | 46808  | 46808  | -2475 | 18926 | AN4441 |
| 1954 | CONTIG77 | 43971  | 44695  | 0.97 | 3.47E-02 | transcription_start_site | + | 47106  | 47106  | -2773 | 18927 | AN4441 |
| 461  | CONTIG77 | 56715  | 56984  | 2.37 | 0.00E+00 | transcription_start_site | - | 56353  | 56353  | -496  | 18928 | AN4443 |
| 461  | CONTIG77 | 56715  | 56984  | 2.37 | 0.00E+00 | transcription_start_site | - | 56277  | 56277  | -572  | 18929 | AN4443 |
| 461  | CONTIG77 | 56715  | 56984  | 2.37 | 0.00E+00 | transcription_start_site | + | 58394  | 58394  | -1544 | 18930 | AN4444 |
| 461  | CONTIG77 | 56715  | 56984  | 2.37 | 0.00E+00 | transcription_start_site | + | 58458  | 58458  | -1608 | 18931 | AN4444 |
| 2022 | CONTIG77 | 65345  | 65614  | 0.93 | 9.60E-02 | transcription_start_site | - | 62098  | 62098  | -3381 | 18932 | AN4445 |
| 2022 | CONTIG77 | 65345  | 65614  | 0.93 | 9.60E-02 | transcription_start_site | - | 61957  | 61957  | -3522 | 18933 | AN4445 |
| 2022 | CONTIG77 | 65345  | 65614  | 0.93 | 9.60E-02 | transcription_start_site | - | 61763  | 61763  | -3716 | 18934 | AN4445 |

|      |          |        |        |      |          |                          |   |        |        |       |       |        |
|------|----------|--------|--------|------|----------|--------------------------|---|--------|--------|-------|-------|--------|
| 211  | CONTIG77 | 68030  | 68611  | 2.8  | 0.00E+00 | transcription_start_site | - | 67554  | 67554  | -766  | 18938 | AN4447 |
| 211  | CONTIG77 | 68030  | 68611  | 2.8  | 0.00E+00 | transcription_start_site | - | 66556  | 66556  | -1764 | 18939 | AN4447 |
| 2022 | CONTIG77 | 65345  | 65614  | 0.93 | 9.60E-02 | transcription_start_site | - | 66556  | 66556  | 1076  | 18939 | AN4447 |
| 211  | CONTIG77 | 68030  | 68611  | 2.8  | 0.00E+00 | transcription_start_site | - | 68297  | 68297  | -23   | 18942 | AN4448 |
| 211  | CONTIG77 | 68030  | 68611  | 2.8  | 0.00E+00 | transcription_start_site | - | 68054  | 68054  | -266  | 18943 | AN4448 |
| 211  | CONTIG77 | 68030  | 68611  | 2.8  | 0.00E+00 | transcription_start_site | - | 68663  | 68663  | 342   | 18941 | AN4448 |
| 211  | CONTIG77 | 68030  | 68611  | 2.8  | 0.00E+00 | transcription_start_site | - | 68983  | 68983  | 662   | 18940 | AN4448 |
| 211  | CONTIG77 | 68030  | 68611  | 2.8  | 0.00E+00 | transcription_start_site | - | 69416  | 69416  | 1095  | 18945 | AN4449 |
| 211  | CONTIG77 | 68030  | 68611  | 2.8  | 0.00E+00 | transcription_start_site | + | 70452  | 70452  | -2131 | 18946 | AN4450 |
| 211  | CONTIG77 | 68030  | 68611  | 2.8  | 0.00E+00 | transcription_start_site | + | 70647  | 70647  | -2326 | 18947 | AN4450 |
| 2022 | CONTIG77 | 65345  | 65614  | 0.93 | 9.60E-02 | transcription_start_site | + | 70452  | 70452  | -4972 | 18946 | AN4450 |
| 2070 | CONTIG77 | 76277  | 76566  | 0.9  | 1.08E-01 | transcription_start_site | - | 74970  | 74970  | -1451 | 18948 | AN4451 |
| 2070 | CONTIG77 | 76277  | 76566  | 0.9  | 1.08E-01 | transcription_start_site | - | 74588  | 74588  | -1833 | 18949 | AN4451 |
| 2070 | CONTIG77 | 76277  | 76566  | 0.9  | 1.08E-01 | transcription_start_site | - | 76533  | 76533  | 111   | 18956 | AN4452 |
| 2070 | CONTIG77 | 76277  | 76566  | 0.9  | 1.08E-01 | transcription_start_site | - | 75868  | 75868  | -553  | 18957 | AN4452 |
| 2070 | CONTIG77 | 76277  | 76566  | 0.9  | 1.08E-01 | transcription_start_site | - | 77158  | 77158  | 736   | 18955 | AN4452 |
| 2070 | CONTIG77 | 76277  | 76566  | 0.9  | 1.08E-01 | transcription_start_site | - | 77315  | 77315  | 893   | 18954 | AN4452 |
| 2070 | CONTIG77 | 76277  | 76566  | 0.9  | 1.08E-01 | transcription_start_site | - | 75497  | 75497  | -924  | 18958 | AN4452 |
| 1035 | CONTIG77 | 107857 | 108131 | 1.68 | 5.08E-03 | transcription_start_site | - | 106846 | 106846 | -1148 | 18985 | AN4462 |
| 1035 | CONTIG77 | 107857 | 108131 | 1.68 | 5.08E-03 | transcription_start_site | - | 103309 | 103309 | -4685 | 18986 | AN4462 |
| 1035 | CONTIG77 | 107857 | 108131 | 1.68 | 5.08E-03 | transcription_start_site | - | 108813 | 108813 | 819   | 18992 | AN4463 |
| 2245 | CONTIG77 | 123090 | 124104 | 0.75 | 1.34E-01 | transcription_start_site | - | 119318 | 119318 | -4279 | 18997 | AN4465 |
| 2245 | CONTIG77 | 123090 | 124104 | 0.75 | 1.34E-01 | transcription_start_site | - | 118555 | 118555 | -5042 | 18998 | AN4465 |
| 1491 | CONTIG77 | 127521 | 127775 | 1.28 | 2.63E-02 | transcription_start_site | - | 128527 | 128527 | 879   | 19004 | AN4467 |
| 1491 | CONTIG77 | 127521 | 127775 | 1.28 | 2.63E-02 | transcription_start_site | - | 128726 | 128726 | 1078  | 19003 | AN4467 |
| 1491 | CONTIG77 | 127521 | 127775 | 1.28 | 2.63E-02 | transcription_start_site | + | 129607 | 129607 | -1959 | 19005 | AN4468 |
| 1491 | CONTIG77 | 127521 | 127775 | 1.28 | 2.63E-02 | transcription_start_site | + | 129662 | 129662 | -2014 | 19006 | AN4468 |
| 1491 | CONTIG77 | 127521 | 127775 | 1.28 | 2.63E-02 | transcription_start_site | + | 129788 | 129788 | -2140 | 19007 | AN4468 |
| 1491 | CONTIG77 | 127521 | 127775 | 1.28 | 2.63E-02 | transcription_start_site | + | 130118 | 130118 | -2470 | 19008 | AN4468 |
| 1437 | CONTIG78 | 3986   | 4274   | 1.32 | 5.36E-02 | transcription_start_site | - | 1825   | 1825   | -2305 | 19011 | AN4470 |
| 1437 | CONTIG78 | 3986   | 4274   | 1.32 | 5.36E-02 | transcription_start_site | - | 1235   | 1235   | -2895 | 19012 | AN4470 |
| 1437 | CONTIG78 | 3986   | 4274   | 1.32 | 5.36E-02 | transcription_start_site | - | 171    | 171    | -3959 | 19013 | AN4470 |
| 1437 | CONTIG78 | 3986   | 4274   | 1.32 | 5.36E-02 | transcription_start_site | - | 3924   | 3924   | -206  | 19014 | AN4471 |
| 1437 | CONTIG78 | 3986   | 4274   | 1.32 | 5.36E-02 | transcription_start_site | - | 2939   | 2939   | -1191 | 19015 | AN4471 |
| 1437 | CONTIG78 | 3986   | 4274   | 1.32 | 5.36E-02 | transcription_start_site | + | 4590   | 4590   | -460  | 19016 | AN4472 |
| 1437 | CONTIG78 | 3986   | 4274   | 1.32 | 5.36E-02 | transcription_start_site | + | 4734   | 4734   | -604  | 19017 | AN4472 |
| 1437 | CONTIG78 | 3986   | 4274   | 1.32 | 5.36E-02 | transcription_start_site | + | 4960   | 4960   | -830  | 19018 | AN4472 |
| 1437 | CONTIG78 | 3986   | 4274   | 1.32 | 5.36E-02 | transcription_start_site | + | 7902   | 7902   | -3772 | 19019 | AN4472 |
| 1437 | CONTIG78 | 3986   | 4274   | 1.32 | 5.36E-02 | transcription_start_site | + | 8113   | 8113   | -3983 | 19020 | AN4472 |
| 63   | CONTIG78 | 11633  | 12877  | 3.2  | 0.00E+00 | transcription_start_site | - | 11773  | 11773  | -482  | 19021 | AN4473 |
| 63   | CONTIG78 | 11633  | 12877  | 3.2  | 0.00E+00 | transcription_start_site | - | 11381  | 11381  | -874  | 19022 | AN4473 |
| 63   | CONTIG78 | 11633  | 12877  | 3.2  | 0.00E+00 | transcription_start_site | - | 11298  | 11298  | -957  | 19023 | AN4473 |
| 1393 | CONTIG78 | 14935  | 15219  | 1.36 | 4.78E-02 | transcription_start_site | - | 11773  | 11773  | -3304 | 19021 | AN4473 |
| 1393 | CONTIG78 | 14935  | 15219  | 1.36 | 4.78E-02 | transcription_start_site | - | 11381  | 11381  | -3696 | 19022 | AN4473 |
| 1393 | CONTIG78 | 14935  | 15219  | 1.36 | 4.78E-02 | transcription_start_site | - | 11298  | 11298  | -3779 | 19023 | AN4473 |
| 2011 | CONTIG78 | 13143  | 13713  | 0.94 | 1.76E-01 | transcription_start_site | - | 11773  | 11773  | -1655 | 19021 | AN4473 |
| 2011 | CONTIG78 | 13143  | 13713  | 0.94 | 1.76E-01 | transcription_start_site | - | 11381  | 11381  | -2047 | 19022 | AN4473 |
| 2011 | CONTIG78 | 13143  | 13713  | 0.94 | 1.76E-01 | transcription_start_site | - | 11298  | 11298  | -2130 | 19023 | AN4473 |
| 63   | CONTIG78 | 11633  | 12877  | 3.2  | 0.00E+00 | transcription_start_site | + | 12951  | 12951  | -696  | 19024 | AN4474 |
| 63   | CONTIG78 | 11633  | 12877  | 3.2  | 0.00E+00 | transcription_start_site | + | 13185  | 13185  | -930  | 19025 | AN4474 |
| 2011 | CONTIG78 | 13143  | 13713  | 0.94 | 1.76E-01 | transcription_start_site | + | 13185  | 13185  | 243   | 19025 | AN4474 |
| 2011 | CONTIG78 | 13143  | 13713  | 0.94 | 1.76E-01 | transcription_start_site | + | 12951  | 12951  | 477   | 19024 | AN4474 |
| 1393 | CONTIG78 | 14935  | 15219  | 1.36 | 4.78E-02 | transcription_start_site | - | 15007  | 15007  | -70   | 19026 | AN4475 |
| 1393 | CONTIG78 | 14935  | 15219  | 1.36 | 4.78E-02 | transcription_start_site | - | 14925  | 14925  | -152  | 19027 | AN4475 |
| 1393 | CONTIG78 | 14935  | 15219  | 1.36 | 4.78E-02 | transcription_start_site | - | 14663  | 14663  | -414  | 19028 | AN4475 |
| 1393 | CONTIG78 | 14935  | 15219  | 1.36 | 4.78E-02 | transcription_start_site | - | 14342  | 14342  | -735  | 19029 | AN4475 |
| 2011 | CONTIG78 | 13143  | 13713  | 0.94 | 1.76E-01 | transcription_start_site | - | 14342  | 14342  | 914   | 19029 | AN4475 |

|      |          |        |        |      |          |                          |   |        |        |       |       |        |
|------|----------|--------|--------|------|----------|--------------------------|---|--------|--------|-------|-------|--------|
| 2011 | CONTIG78 | 13143  | 13713  | 0.94 | 1.76E-01 | transcription_start_site | - | 14663  | 14663  | 1235  | 19028 | AN4475 |
| 1266 | CONTIG78 | 26042  | 26454  | 1.47 | 3.34E-02 | transcription_start_site | + | 27350  | 27350  | -1102 | 19036 | AN4479 |
| 1266 | CONTIG78 | 26042  | 26454  | 1.47 | 3.34E-02 | transcription_start_site | + | 27645  | 27645  | -1397 | 19037 | AN4479 |
| 248  | CONTIG78 | 38794  | 39218  | 2.71 | 0.00E+00 | transcription_start_site | - | 34838  | 34838  | -4168 | 19038 | AN4480 |
| 248  | CONTIG78 | 38794  | 39218  | 2.71 | 0.00E+00 | transcription_start_site | - | 37171  | 37171  | -1835 | 19039 | AN4481 |
| 248  | CONTIG78 | 38794  | 39218  | 2.71 | 0.00E+00 | transcription_start_site | - | 35802  | 35802  | -3204 | 19040 | AN4481 |
| 248  | CONTIG78 | 38794  | 39218  | 2.71 | 0.00E+00 | transcription_start_site | - | 35738  | 35738  | -3268 | 19041 | AN4481 |
| 248  | CONTIG78 | 38794  | 39218  | 2.71 | 0.00E+00 | transcription_start_site | - | 35558  | 35558  | -3448 | 19042 | AN4481 |
| 248  | CONTIG78 | 38794  | 39218  | 2.71 | 0.00E+00 | transcription_start_site | + | 40298  | 40298  | -1292 | 19043 | AN4482 |
| 248  | CONTIG78 | 38794  | 39218  | 2.71 | 0.00E+00 | transcription_start_site | + | 40700  | 40700  | -1694 | 19044 | AN4482 |
| 248  | CONTIG78 | 38794  | 39218  | 2.71 | 0.00E+00 | transcription_start_site | + | 40847  | 40847  | -1841 | 19045 | AN4482 |
| 248  | CONTIG78 | 38794  | 39218  | 2.71 | 0.00E+00 | transcription_start_site | + | 40909  | 40909  | -1903 | 19046 | AN4482 |
| 248  | CONTIG78 | 38794  | 39218  | 2.71 | 0.00E+00 | transcription_start_site | + | 41176  | 41176  | -2170 | 19047 | AN4482 |
| 248  | CONTIG78 | 38794  | 39218  | 2.71 | 0.00E+00 | transcription_start_site | + | 41777  | 41777  | -2771 | 19048 | AN4482 |
| 746  | CONTIG78 | 42762  | 43256  | 2    | 2.49E-03 | transcription_start_site | + | 41777  | 41777  | 1232  | 19048 | AN4482 |
| 843  | CONTIG78 | 46127  | 47083  | 1.88 | 0.00E+00 | transcription_start_site | - | 45899  | 45899  | -706  | 19049 | AN4483 |
| 843  | CONTIG78 | 46127  | 47083  | 1.88 | 0.00E+00 | transcription_start_site | - | 45340  | 45340  | -1265 | 19050 | AN4483 |
| 843  | CONTIG78 | 46127  | 47083  | 1.88 | 0.00E+00 | transcription_start_site | - | 45185  | 45185  | -1420 | 19051 | AN4483 |
| 843  | CONTIG78 | 46127  | 47083  | 1.88 | 0.00E+00 | transcription_start_site | - | 44893  | 44893  | -1712 | 19052 | AN4483 |
| 2078 | CONTIG78 | 43802  | 44241  | 0.9  | 1.97E-01 | transcription_start_site | - | 44893  | 44893  | 871   | 19052 | AN4483 |
| 2078 | CONTIG78 | 43802  | 44241  | 0.9  | 1.97E-01 | transcription_start_site | - | 45185  | 45185  | 1163  | 19051 | AN4483 |
| 746  | CONTIG78 | 42762  | 43256  | 2    | 2.49E-03 | transcription_start_site | + | 47872  | 47872  | -4863 | 19053 | AN4484 |
| 843  | CONTIG78 | 46127  | 47083  | 1.88 | 0.00E+00 | transcription_start_site | + | 47872  | 47872  | -1267 | 19053 | AN4484 |
| 2078 | CONTIG78 | 43802  | 44241  | 0.9  | 1.97E-01 | transcription_start_site | + | 47872  | 47872  | -3850 | 19053 | AN4484 |
| 843  | CONTIG78 | 46127  | 47083  | 1.88 | 0.00E+00 | transcription_start_site | + | 51984  | 51984  | -5379 | 19054 | AN4485 |
| 1774 | CONTIG78 | 82821  | 83170  | 1.09 | 1.08E-01 | transcription_start_site | - | 78881  | 78881  | -4114 | 19090 | AN4495 |
| 1774 | CONTIG78 | 82821  | 83170  | 1.09 | 1.08E-01 | transcription_start_site | - | 82578  | 82578  | -417  | 19091 | AN4496 |
| 1774 | CONTIG78 | 82821  | 83170  | 1.09 | 1.08E-01 | transcription_start_site | - | 82390  | 82390  | -605  | 19092 | AN4496 |
| 1774 | CONTIG78 | 82821  | 83170  | 1.09 | 1.08E-01 | transcription_start_site | - | 82178  | 82178  | -817  | 19093 | AN4496 |
| 1774 | CONTIG78 | 82821  | 83170  | 1.09 | 1.08E-01 | transcription_start_site | + | 84937  | 84937  | -1941 | 19094 | AN4497 |
| 194  | CONTIG78 | 101553 | 102287 | 2.83 | 0.00E+00 | transcription_start_site | - | 101111 | 101111 | -809  | 19111 | AN4502 |
| 194  | CONTIG78 | 101553 | 102287 | 2.83 | 0.00E+00 | transcription_start_site | - | 100731 | 100731 | -1189 | 19112 | AN4502 |
| 540  | CONTIG78 | 103960 | 104776 | 2.26 | 0.00E+00 | transcription_start_site | - | 101111 | 101111 | -3257 | 19111 | AN4502 |
| 540  | CONTIG78 | 103960 | 104776 | 2.26 | 0.00E+00 | transcription_start_site | - | 100731 | 100731 | -3637 | 19112 | AN4502 |
| 1267 | CONTIG78 | 102678 | 103252 | 1.47 | 3.34E-02 | transcription_start_site | - | 101111 | 101111 | -1854 | 19111 | AN4502 |
| 1267 | CONTIG78 | 102678 | 103252 | 1.47 | 3.34E-02 | transcription_start_site | - | 100731 | 100731 | -2234 | 19112 | AN4502 |
| 916  | CONTIG78 | 118587 | 118926 | 1.81 | 1.06E-02 | transcription_start_site | - | 117172 | 117172 | -1584 | 19125 | AN4508 |
| 916  | CONTIG78 | 118587 | 118926 | 1.81 | 1.06E-02 | transcription_start_site | - | 116591 | 116591 | -2165 | 19126 | AN4508 |
| 916  | CONTIG78 | 118587 | 118926 | 1.81 | 1.06E-02 | transcription_start_site | + | 118824 | 118824 | -67   | 19127 | AN4509 |
| 916  | CONTIG78 | 118587 | 118926 | 1.81 | 1.06E-02 | transcription_start_site | + | 119659 | 119659 | -902  | 19128 | AN4509 |
| 1062 | CONTIG78 | 126469 | 126893 | 1.66 | 1.80E-02 | transcription_start_site | - | 126481 | 126481 | -200  | 19129 | AN4510 |
| 1062 | CONTIG78 | 126469 | 126893 | 1.66 | 1.80E-02 | transcription_start_site | - | 124001 | 124001 | -2680 | 19130 | AN4510 |
| 1062 | CONTIG78 | 126469 | 126893 | 1.66 | 1.80E-02 | transcription_start_site | + | 129091 | 129091 | -2410 | 19133 | AN4512 |
| 1062 | CONTIG78 | 126469 | 126893 | 1.66 | 1.80E-02 | transcription_start_site | + | 129180 | 129180 | -2499 | 19134 | AN4512 |
| 1062 | CONTIG78 | 126469 | 126893 | 1.66 | 1.80E-02 | transcription_start_site | + | 130396 | 130396 | -3715 | 19135 | AN4513 |
| 1062 | CONTIG78 | 126469 | 126893 | 1.66 | 1.80E-02 | transcription_start_site | + | 130652 | 130652 | -3971 | 19136 | AN4513 |
| 1651 | CONTIG78 | 138771 | 139270 | 1.17 | 4.73E-02 | transcription_start_site | + | 140026 | 140026 | -1005 | 19137 | AN4515 |
| 1651 | CONTIG78 | 138771 | 139270 | 1.17 | 4.73E-02 | transcription_start_site | + | 140202 | 140202 | -1181 | 19138 | AN4515 |
| 1651 | CONTIG78 | 138771 | 139270 | 1.17 | 4.73E-02 | transcription_start_site | + | 140695 | 140695 | -1674 | 19139 | AN4515 |
| 1820 | CONTIG78 | 183157 | 183426 | 1.06 | 1.22E-01 | transcription_start_site | + | 182647 | 182647 | 644   | 19165 | AN4524 |
| 1820 | CONTIG78 | 183157 | 183426 | 1.06 | 1.22E-01 | transcription_start_site | + | 183376 | 183376 | -84   | 19166 | AN4525 |
| 1820 | CONTIG78 | 183157 | 183426 | 1.06 | 1.22E-01 | transcription_start_site | + | 183618 | 183618 | -326  | 19167 | AN4525 |
| 1820 | CONTIG78 | 183157 | 183426 | 1.06 | 1.22E-01 | transcription_start_site | + | 183901 | 183901 | -609  | 19168 | AN4525 |
| 1820 | CONTIG78 | 183157 | 183426 | 1.06 | 1.22E-01 | transcription_start_site | + | 184125 | 184125 | -833  | 19169 | AN4525 |
| 1820 | CONTIG78 | 183157 | 183426 | 1.06 | 1.22E-01 | transcription_start_site | + | 184288 | 184288 | -996  | 19170 | AN4525 |
| 1820 | CONTIG78 | 183157 | 183426 | 1.06 | 1.22E-01 | transcription_start_site | + | 184444 | 184444 | -1152 | 19171 | AN4525 |
| 1652 | CONTIG78 | 214512 | 215011 | 1.17 | 4.73E-02 | transcription_start_site | - | 213479 | 213479 | -1282 | 19202 | AN4535 |

|      |          |        |        |      |          |                          |   |        |        |       |       |        |
|------|----------|--------|--------|------|----------|--------------------------|---|--------|--------|-------|-------|--------|
| 2006 | CONTIG78 | 213532 | 214486 | 0.94 | 1.15E-01 | transcription_start_site | - | 213479 | 213479 | -530  | 19202 | AN4535 |
| 1394 | CONTIG78 | 220362 | 220711 | 1.36 | 4.78E-02 | transcription_start_site | - | 219312 | 219312 | -1224 | 19203 | AN4536 |
| 1394 | CONTIG78 | 220362 | 220711 | 1.36 | 4.78E-02 | transcription_start_site | - | 218978 | 218978 | -1558 | 19204 | AN4536 |
| 1394 | CONTIG78 | 220362 | 220711 | 1.36 | 4.78E-02 | transcription_start_site | - | 218721 | 218721 | -1815 | 19205 | AN4536 |
| 1394 | CONTIG78 | 220362 | 220711 | 1.36 | 4.78E-02 | transcription_start_site | - | 215749 | 215749 | -4787 | 19206 | AN4536 |
| 1652 | CONTIG78 | 214512 | 215011 | 1.17 | 4.73E-02 | transcription_start_site | - | 215749 | 215749 | 987   | 19206 | AN4536 |
| 1394 | CONTIG78 | 220362 | 220711 | 1.36 | 4.78E-02 | transcription_start_site | - | 220364 | 220364 | -172  | 19213 | AN4537 |
| 1394 | CONTIG78 | 220362 | 220711 | 1.36 | 4.78E-02 | transcription_start_site | + | 223440 | 223440 | -2903 | 19214 | AN4538 |
| 478  | CONTIG78 | 230937 | 231216 | 2.34 | 1.45E-03 | transcription_start_site | - | 229728 | 229728 | -1348 | 19223 | AN4541 |
| 478  | CONTIG78 | 230937 | 231216 | 2.34 | 1.45E-03 | transcription_start_site | - | 229161 | 229161 | -1915 | 19224 | AN4541 |
| 478  | CONTIG78 | 230937 | 231216 | 2.34 | 1.45E-03 | transcription_start_site | + | 232183 | 232183 | -1106 | 19225 | AN4542 |
| 478  | CONTIG78 | 230937 | 231216 | 2.34 | 1.45E-03 | transcription_start_site | + | 232301 | 232301 | -1224 | 19226 | AN4542 |
| 478  | CONTIG78 | 230937 | 231216 | 2.34 | 1.45E-03 | transcription_start_site | + | 233015 | 233015 | -1938 | 19227 | AN4542 |
| 1358 | CONTIG78 | 239854 | 240203 | 1.39 | 4.20E-02 | transcription_start_site | - | 236226 | 236226 | -3802 | 19228 | AN4543 |
| 1358 | CONTIG78 | 239854 | 240203 | 1.39 | 4.20E-02 | transcription_start_site | - | 236007 | 236007 | -4021 | 19229 | AN4543 |
| 1945 | CONTIG78 | 240754 | 241331 | 0.98 | 1.54E-01 | transcription_start_site | - | 236226 | 236226 | -4816 | 19228 | AN4543 |
| 1945 | CONTIG78 | 240754 | 241331 | 0.98 | 1.54E-01 | transcription_start_site | - | 236007 | 236007 | -5035 | 19229 | AN4543 |
| 116  | CONTIG78 | 242864 | 243143 | 3.05 | 0.00E+00 | transcription_start_site | - | 238917 | 238917 | -4086 | 19230 | AN4544 |
| 1358 | CONTIG78 | 239854 | 240203 | 1.39 | 4.20E-02 | transcription_start_site | - | 238917 | 238917 | -1111 | 19230 | AN4544 |
| 1945 | CONTIG78 | 240754 | 241331 | 0.98 | 1.54E-01 | transcription_start_site | - | 238917 | 238917 | -2125 | 19230 | AN4544 |
| 116  | CONTIG78 | 242864 | 243143 | 3.05 | 0.00E+00 | transcription_start_site | + | 243691 | 243691 | -687  | 19231 | AN4545 |
| 116  | CONTIG78 | 242864 | 243143 | 3.05 | 0.00E+00 | transcription_start_site | + | 244863 | 244863 | -1859 | 19232 | AN4545 |
| 1175 | CONTIG78 | 244589 | 245003 | 1.55 | 2.55E-03 | transcription_start_site | + | 244863 | 244863 | -67   | 19232 | AN4545 |
| 1175 | CONTIG78 | 244589 | 245003 | 1.55 | 2.55E-03 | transcription_start_site | + | 243691 | 243691 | 1105  | 19231 | AN4545 |
| 1358 | CONTIG78 | 239854 | 240203 | 1.39 | 4.20E-02 | transcription_start_site | + | 243691 | 243691 | -3662 | 19231 | AN4545 |
| 1358 | CONTIG78 | 239854 | 240203 | 1.39 | 4.20E-02 | transcription_start_site | + | 244863 | 244863 | -4834 | 19232 | AN4545 |
| 1945 | CONTIG78 | 240754 | 241331 | 0.98 | 1.54E-01 | transcription_start_site | + | 243691 | 243691 | -2648 | 19231 | AN4545 |
| 1945 | CONTIG78 | 240754 | 241331 | 0.98 | 1.54E-01 | transcription_start_site | + | 244863 | 244863 | -3820 | 19232 | AN4545 |
| 1136 | CONTIG78 | 266035 | 266379 | 1.58 | 2.29E-02 | transcription_start_site | - | 265866 | 265866 | -341  | 19254 | AN4552 |
| 1136 | CONTIG78 | 266035 | 266379 | 1.58 | 2.29E-02 | transcription_start_site | - | 265692 | 265692 | -515  | 19255 | AN4552 |
| 1136 | CONTIG78 | 266035 | 266379 | 1.58 | 2.29E-02 | transcription_start_site | - | 265587 | 265587 | -620  | 19256 | AN4552 |
| 1136 | CONTIG78 | 266035 | 266379 | 1.58 | 2.29E-02 | transcription_start_site | - | 265468 | 265468 | -739  | 19257 | AN4552 |
| 1136 | CONTIG78 | 266035 | 266379 | 1.58 | 2.29E-02 | transcription_start_site | - | 265355 | 265355 | -852  | 19258 | AN4552 |
| 1136 | CONTIG78 | 266035 | 266379 | 1.58 | 2.29E-02 | transcription_start_site | - | 265157 | 265157 | -1050 | 19259 | AN4552 |
| 1136 | CONTIG78 | 266035 | 266379 | 1.58 | 2.29E-02 | transcription_start_site | - | 265032 | 265032 | -1175 | 19260 | AN4552 |
| 1136 | CONTIG78 | 266035 | 266379 | 1.58 | 2.29E-02 | transcription_start_site | - | 264454 | 264454 | -1753 | 19261 | AN4552 |
| 1136 | CONTIG78 | 266035 | 266379 | 1.58 | 2.29E-02 | transcription_start_site | - | 264019 | 264019 | -2188 | 19262 | AN4552 |
| 1136 | CONTIG78 | 266035 | 266379 | 1.58 | 2.29E-02 | transcription_start_site | - | 263745 | 263745 | -2462 | 19263 | AN4552 |
| 1136 | CONTIG78 | 266035 | 266379 | 1.58 | 2.29E-02 | transcription_start_site | + | 266265 | 266265 | -58   | 19264 | AN4553 |
| 1136 | CONTIG78 | 266035 | 266379 | 1.58 | 2.29E-02 | transcription_start_site | + | 266352 | 266352 | -145  | 19265 | AN4553 |
| 1136 | CONTIG78 | 266035 | 266379 | 1.58 | 2.29E-02 | transcription_start_site | + | 266441 | 266441 | -234  | 19266 | AN4553 |
| 1136 | CONTIG78 | 266035 | 266379 | 1.58 | 2.29E-02 | transcription_start_site | + | 266773 | 266773 | -566  | 19267 | AN4553 |
| 1136 | CONTIG78 | 266035 | 266379 | 1.58 | 2.29E-02 | transcription_start_site | + | 267422 | 267422 | -1215 | 19268 | AN4554 |
| 1024 | CONTIG78 | 280446 | 280872 | 1.7  | 1.54E-02 | transcription_start_site | - | 276253 | 276253 | -4406 | 19278 | AN4557 |
| 1024 | CONTIG78 | 280446 | 280872 | 1.7  | 1.54E-02 | transcription_start_site | - | 280067 | 280067 | -592  | 19280 | AN4558 |
| 1024 | CONTIG78 | 280446 | 280872 | 1.7  | 1.54E-02 | transcription_start_site | - | 279793 | 279793 | -866  | 19281 | AN4558 |
| 1024 | CONTIG78 | 280446 | 280872 | 1.7  | 1.54E-02 | transcription_start_site | - | 279607 | 279607 | -1052 | 19282 | AN4558 |
| 1024 | CONTIG78 | 280446 | 280872 | 1.7  | 1.54E-02 | transcription_start_site | - | 279081 | 279081 | -1578 | 19283 | AN4558 |
| 1024 | CONTIG78 | 280446 | 280872 | 1.7  | 1.54E-02 | transcription_start_site | - | 278625 | 278625 | -2034 | 19284 | AN4558 |
| 1024 | CONTIG78 | 280446 | 280872 | 1.7  | 1.54E-02 | transcription_start_site | - | 278400 | 278400 | -2259 | 19285 | AN4558 |
| 1024 | CONTIG78 | 280446 | 280872 | 1.7  | 1.54E-02 | transcription_start_site | - | 277780 | 277780 | -2879 | 19286 | AN4558 |
| 1024 | CONTIG78 | 280446 | 280872 | 1.7  | 1.54E-02 | transcription_start_site | - | 281443 | 281443 | 784   | 19290 | AN4559 |
| 1024 | CONTIG78 | 280446 | 280872 | 1.7  | 1.54E-02 | transcription_start_site | - | 281552 | 281552 | 893   | 19289 | AN4559 |
| 1024 | CONTIG78 | 280446 | 280872 | 1.7  | 1.54E-02 | transcription_start_site | - | 281675 | 281675 | 1016  | 19288 | AN4559 |
| 1024 | CONTIG78 | 280446 | 280872 | 1.7  | 1.54E-02 | transcription_start_site | - | 281781 | 281781 | 1122  | 19287 | AN4559 |
| 1024 | CONTIG78 | 280446 | 280872 | 1.7  | 1.54E-02 | transcription_start_site | + | 282052 | 282052 | -1393 | 19291 | AN4560 |
| 1024 | CONTIG78 | 280446 | 280872 | 1.7  | 1.54E-02 | transcription_start_site | + | 282126 | 282126 | -1467 | 19292 | AN4560 |



|      |          |        |        |      |          |                          |   |        |        |       |       |        |
|------|----------|--------|--------|------|----------|--------------------------|---|--------|--------|-------|-------|--------|
| 1024 | CONTIG78 | 280446 | 280872 | 1.7  | 1.54E-02 | transcription_start_site | + | 283244 | 283244 | -2585 | 19293 | AN4561 |
| 1024 | CONTIG78 | 280446 | 280872 | 1.7  | 1.54E-02 | transcription_start_site | + | 283367 | 283367 | -2708 | 19294 | AN4561 |
| 1024 | CONTIG78 | 280446 | 280872 | 1.7  | 1.54E-02 | transcription_start_site | + | 283638 | 283638 | -2979 | 19295 | AN4561 |
| 1024 | CONTIG78 | 280446 | 280872 | 1.7  | 1.54E-02 | transcription_start_site | + | 284061 | 284061 | -3402 | 19296 | AN4561 |
| 1769 | CONTIG78 | 296628 | 296977 | 1.09 | 6.50E-02 | transcription_start_site | - | 295712 | 295712 | -1090 | 19304 | AN4564 |
| 1769 | CONTIG78 | 296628 | 296977 | 1.09 | 6.50E-02 | transcription_start_site | - | 295375 | 295375 | -1427 | 19305 | AN4564 |
| 1769 | CONTIG78 | 296628 | 296977 | 1.09 | 6.50E-02 | transcription_start_site | - | 294926 | 294926 | -1876 | 19306 | AN4564 |
| 1769 | CONTIG78 | 296628 | 296977 | 1.09 | 6.50E-02 | transcription_start_site | - | 294583 | 294583 | -2219 | 19307 | AN4564 |
| 1769 | CONTIG78 | 296628 | 296977 | 1.09 | 6.50E-02 | transcription_start_site | + | 297869 | 297869 | -1066 | 19308 | AN4565 |
| 1769 | CONTIG78 | 296628 | 296977 | 1.09 | 6.50E-02 | transcription_start_site | + | 298387 | 298387 | -1584 | 19309 | AN4565 |
| 128  | CONTIG78 | 303093 | 303362 | 3.02 | 0.00E+00 | transcription_start_site | - | 302824 | 302824 | -403  | 19310 | AN4566 |
| 128  | CONTIG78 | 303093 | 303362 | 3.02 | 0.00E+00 | transcription_start_site | - | 302483 | 302483 | -744  | 19311 | AN4566 |
| 128  | CONTIG78 | 303093 | 303362 | 3.02 | 0.00E+00 | transcription_start_site | - | 302248 | 302248 | -979  | 19312 | AN4566 |
| 128  | CONTIG78 | 303093 | 303362 | 3.02 | 0.00E+00 | transcription_start_site | - | 300568 | 300568 | -2659 | 19313 | AN4566 |
| 128  | CONTIG78 | 303093 | 303362 | 3.02 | 0.00E+00 | transcription_start_site | - | 300118 | 300118 | -3109 | 19314 | AN4566 |
| 128  | CONTIG78 | 303093 | 303362 | 3.02 | 0.00E+00 | transcription_start_site | - | 299552 | 299552 | -3675 | 19315 | AN4566 |
| 1821 | CONTIG78 | 308940 | 309361 | 1.06 | 1.22E-01 | transcription_start_site | - | 305629 | 305629 | -3521 | 19316 | AN4567 |
| 1821 | CONTIG78 | 308940 | 309361 | 1.06 | 1.22E-01 | transcription_start_site | - | 305410 | 305410 | -3740 | 19317 | AN4567 |
| 1821 | CONTIG78 | 308940 | 309361 | 1.06 | 1.22E-01 | transcription_start_site | - | 304616 | 304616 | -4534 | 19318 | AN4567 |
| 1821 | CONTIG78 | 308940 | 309361 | 1.06 | 1.22E-01 | transcription_start_site | - | 304451 | 304451 | -4699 | 19319 | AN4567 |
| 1821 | CONTIG78 | 308940 | 309361 | 1.06 | 1.22E-01 | transcription_start_site | - | 308910 | 308910 | -240  | 19320 | AN4569 |
| 1821 | CONTIG78 | 308940 | 309361 | 1.06 | 1.22E-01 | transcription_start_site | + | 309444 | 309444 | -293  | 19321 | AN4570 |
| 1821 | CONTIG78 | 308940 | 309361 | 1.06 | 1.22E-01 | transcription_start_site | + | 309754 | 309754 | -603  | 19322 | AN4570 |
| 1821 | CONTIG78 | 308940 | 309361 | 1.06 | 1.22E-01 | transcription_start_site | + | 310537 | 310537 | -1386 | 19323 | AN4570 |
| 1821 | CONTIG78 | 308940 | 309361 | 1.06 | 1.22E-01 | transcription_start_site | + | 310726 | 310726 | -1575 | 19324 | AN4570 |
| 1821 | CONTIG78 | 308940 | 309361 | 1.06 | 1.22E-01 | transcription_start_site | + | 311971 | 311971 | -2820 | 19325 | AN4571 |
| 2119 | CONTIG78 | 342683 | 343252 | 0.87 | 1.57E-01 | transcription_start_site | - | 337946 | 337946 | -5021 | 19356 | AN4583 |
| 2119 | CONTIG78 | 342683 | 343252 | 0.87 | 1.57E-01 | transcription_start_site | - | 337861 | 337861 | -5106 | 19357 | AN4583 |
| 2119 | CONTIG78 | 342683 | 343252 | 0.87 | 1.57E-01 | transcription_start_site | - | 337739 | 337739 | -5228 | 19358 | AN4583 |
| 2119 | CONTIG78 | 342683 | 343252 | 0.87 | 1.57E-01 | transcription_start_site | - | 339053 | 339053 | -3914 | 19361 | AN4584 |
| 2119 | CONTIG78 | 342683 | 343252 | 0.87 | 1.57E-01 | transcription_start_site | - | 338931 | 338931 | -4036 | 19362 | AN4584 |
| 2119 | CONTIG78 | 342683 | 343252 | 0.87 | 1.57E-01 | transcription_start_site | - | 338860 | 338860 | -4107 | 19363 | AN4584 |
| 2119 | CONTIG78 | 342683 | 343252 | 0.87 | 1.57E-01 | transcription_start_site | - | 338564 | 338564 | -4403 | 19364 | AN4584 |
| 2119 | CONTIG78 | 342683 | 343252 | 0.87 | 1.57E-01 | transcription_start_site | + | 343575 | 343575 | -607  | 19368 | AN4586 |
| 2119 | CONTIG78 | 342683 | 343252 | 0.87 | 1.57E-01 | transcription_start_site | + | 343652 | 343652 | -684  | 19369 | AN4586 |
| 2119 | CONTIG78 | 342683 | 343252 | 0.87 | 1.57E-01 | transcription_start_site | + | 344129 | 344129 | -1161 | 19370 | AN4586 |
| 1822 | CONTIG78 | 351079 | 351370 | 1.06 | 1.22E-01 | transcription_start_site | - | 350887 | 350887 | -337  | 19376 | AN4589 |
| 1822 | CONTIG78 | 351079 | 351370 | 1.06 | 1.22E-01 | transcription_start_site | - | 350710 | 350710 | -514  | 19377 | AN4589 |
| 1822 | CONTIG78 | 351079 | 351370 | 1.06 | 1.22E-01 | transcription_start_site | - | 350547 | 350547 | -677  | 19378 | AN4589 |
| 1822 | CONTIG78 | 351079 | 351370 | 1.06 | 1.22E-01 | transcription_start_site | - | 351720 | 351720 | 495   | 19384 | AN4590 |
| 1822 | CONTIG78 | 351079 | 351370 | 1.06 | 1.22E-01 | transcription_start_site | - | 352111 | 352111 | 886   | 19383 | AN4590 |
| 1822 | CONTIG78 | 351079 | 351370 | 1.06 | 1.22E-01 | transcription_start_site | - | 352238 | 352238 | 1013  | 19382 | AN4590 |
| 2147 | CONTIG79 | 4958   | 5307   | 0.84 | 1.76E-01 | transcription_start_site | - | 4467   | 4467   | -665  | 19385 | AN4591 |
| 2147 | CONTIG79 | 4958   | 5307   | 0.84 | 1.76E-01 | transcription_start_site | - | 4400   | 4400   | -732  | 19386 | AN4591 |
| 2147 | CONTIG79 | 4958   | 5307   | 0.84 | 1.76E-01 | transcription_start_site | - | 4317   | 4317   | -815  | 19387 | AN4591 |
| 2147 | CONTIG79 | 4958   | 5307   | 0.84 | 1.76E-01 | transcription_start_site | - | 4172   | 4172   | -960  | 19388 | AN4591 |
| 2147 | CONTIG79 | 4958   | 5307   | 0.84 | 1.76E-01 | transcription_start_site | - | 3736   | 3736   | -1396 | 19389 | AN4591 |
| 2147 | CONTIG79 | 4958   | 5307   | 0.84 | 1.76E-01 | transcription_start_site | - | 3452   | 3452   | -1680 | 19390 | AN4591 |
| 2147 | CONTIG79 | 4958   | 5307   | 0.84 | 1.76E-01 | transcription_start_site | - | 3112   | 3112   | -2020 | 19391 | AN4591 |
| 2147 | CONTIG79 | 4958   | 5307   | 0.84 | 1.76E-01 | transcription_start_site | - | 2379   | 2379   | -2753 | 19392 | AN4591 |
| 2147 | CONTIG79 | 4958   | 5307   | 0.84 | 1.76E-01 | transcription_start_site | + | 5064   | 5064   | 68    | 19394 | AN4592 |
| 2147 | CONTIG79 | 4958   | 5307   | 0.84 | 1.76E-01 | transcription_start_site | + | 4821   | 4821   | 311   | 19393 | AN4592 |
| 2147 | CONTIG79 | 4958   | 5307   | 0.84 | 1.76E-01 | transcription_start_site | + | 9706   | 9706   | -4573 | 19396 | AN4594 |
| 2147 | CONTIG79 | 4958   | 5307   | 0.84 | 1.76E-01 | transcription_start_site | + | 9831   | 9831   | -4698 | 19397 | AN4594 |
| 2147 | CONTIG79 | 4958   | 5307   | 0.84 | 1.76E-01 | transcription_start_site | + | 10139  | 10139  | -5006 | 19398 | AN4594 |
| 679  | CONTIG79 | 23028  | 23377  | 2.07 | 1.45E-03 | transcription_start_site | - | 21942  | 21942  | -1260 | 19412 | AN4598 |
| 679  | CONTIG79 | 23028  | 23377  | 2.07 | 1.45E-03 | transcription_start_site | - | 21591  | 21591  | -1611 | 19413 | AN4598 |

|      |          |        |        |      |          |                          |   |        |        |       |       |        |
|------|----------|--------|--------|------|----------|--------------------------|---|--------|--------|-------|-------|--------|
| 501  | CONTIG79 | 30321  | 30650  | 2.31 | 2.51E-04 | transcription_start_site | - | 28467  | 28467  | -2018 | 19414 | AN4599 |
| 501  | CONTIG79 | 30321  | 30650  | 2.31 | 2.51E-04 | transcription_start_site | - | 28367  | 28367  | -2118 | 19415 | AN4599 |
| 501  | CONTIG79 | 30321  | 30650  | 2.31 | 2.51E-04 | transcription_start_site | - | 27912  | 27912  | -2573 | 19416 | AN4599 |
| 501  | CONTIG79 | 30321  | 30650  | 2.31 | 2.51E-04 | transcription_start_site | - | 27739  | 27739  | -2746 | 19417 | AN4599 |
| 501  | CONTIG79 | 30321  | 30650  | 2.31 | 2.51E-04 | transcription_start_site | - | 27377  | 27377  | -3108 | 19418 | AN4599 |
| 501  | CONTIG79 | 30321  | 30650  | 2.31 | 2.51E-04 | transcription_start_site | + | 31188  | 31188  | -702  | 19421 | AN4601 |
| 501  | CONTIG79 | 30321  | 30650  | 2.31 | 2.51E-04 | transcription_start_site | + | 32546  | 32546  | -2060 | 19422 | AN4601 |
| 501  | CONTIG79 | 30321  | 30650  | 2.31 | 2.51E-04 | transcription_start_site | + | 35178  | 35178  | -4692 | 19423 | AN4601 |
| 680  | CONTIG79 | 40428  | 40861  | 2.07 | 1.45E-03 | transcription_start_site | - | 36814  | 36814  | -3830 | 19424 | AN4602 |
| 680  | CONTIG79 | 40428  | 40861  | 2.07 | 1.45E-03 | transcription_start_site | - | 36723  | 36723  | -3921 | 19425 | AN4602 |
| 680  | CONTIG79 | 40428  | 40861  | 2.07 | 1.45E-03 | transcription_start_site | - | 36186  | 36186  | -4458 | 19426 | AN4602 |
| 680  | CONTIG79 | 40428  | 40861  | 2.07 | 1.45E-03 | transcription_start_site | - | 40222  | 40222  | -422  | 19427 | AN4603 |
| 680  | CONTIG79 | 40428  | 40861  | 2.07 | 1.45E-03 | transcription_start_site | - | 39671  | 39671  | -973  | 19428 | AN4603 |
| 680  | CONTIG79 | 40428  | 40861  | 2.07 | 1.45E-03 | transcription_start_site | + | 44830  | 44830  | -4185 | 19434 | AN4605 |
| 680  | CONTIG79 | 40428  | 40861  | 2.07 | 1.45E-03 | transcription_start_site | + | 45419  | 45419  | -4774 | 19435 | AN4605 |
| 944  | CONTIG79 | 66768  | 67267  | 1.77 | 2.49E-03 | transcription_start_site | - | 65348  | 65348  | -1669 | 19456 | AN4613 |
| 1855 | CONTIG79 | 68643  | 69132  | 1.04 | 8.63E-02 | transcription_start_site | - | 65348  | 65348  | -3539 | 19456 | AN4613 |
| 944  | CONTIG79 | 66768  | 67267  | 1.77 | 2.49E-03 | transcription_start_site | - | 66758  | 66758  | -259  | 19457 | AN4614 |
| 944  | CONTIG79 | 66768  | 67267  | 1.77 | 2.49E-03 | transcription_start_site | - | 66625  | 66625  | -392  | 19458 | AN4614 |
| 944  | CONTIG79 | 66768  | 67267  | 1.77 | 2.49E-03 | transcription_start_site | - | 66376  | 66376  | -641  | 19459 | AN4614 |
| 944  | CONTIG79 | 66768  | 67267  | 1.77 | 2.49E-03 | transcription_start_site | - | 66023  | 66023  | -994  | 19460 | AN4614 |
| 1855 | CONTIG79 | 68643  | 69132  | 1.04 | 8.63E-02 | transcription_start_site | - | 66758  | 66758  | -2129 | 19457 | AN4614 |
| 1855 | CONTIG79 | 68643  | 69132  | 1.04 | 8.63E-02 | transcription_start_site | - | 66625  | 66625  | -2262 | 19458 | AN4614 |
| 1855 | CONTIG79 | 68643  | 69132  | 1.04 | 8.63E-02 | transcription_start_site | - | 66376  | 66376  | -2511 | 19459 | AN4614 |
| 1855 | CONTIG79 | 68643  | 69132  | 1.04 | 8.63E-02 | transcription_start_site | - | 66023  | 66023  | -2864 | 19460 | AN4614 |
| 944  | CONTIG79 | 66768  | 67267  | 1.77 | 2.49E-03 | transcription_start_site | + | 67480  | 67480  | -462  | 19461 | AN4615 |
| 944  | CONTIG79 | 66768  | 67267  | 1.77 | 2.49E-03 | transcription_start_site | + | 67551  | 67551  | -533  | 19462 | AN4615 |
| 944  | CONTIG79 | 66768  | 67267  | 1.77 | 2.49E-03 | transcription_start_site | + | 67905  | 67905  | -887  | 19463 | AN4615 |
| 944  | CONTIG79 | 66768  | 67267  | 1.77 | 2.49E-03 | transcription_start_site | + | 68141  | 68141  | -1123 | 19464 | AN4615 |
| 1855 | CONTIG79 | 68643  | 69132  | 1.04 | 8.63E-02 | transcription_start_site | + | 68141  | 68141  | 746   | 19464 | AN4615 |
| 1855 | CONTIG79 | 68643  | 69132  | 1.04 | 8.63E-02 | transcription_start_site | + | 67905  | 67905  | 982   | 19463 | AN4615 |
| 944  | CONTIG79 | 66768  | 67267  | 1.77 | 2.49E-03 | transcription_start_site | + | 71505  | 71505  | -4487 | 19469 | AN4617 |
| 1855 | CONTIG79 | 68643  | 69132  | 1.04 | 8.63E-02 | transcription_start_site | + | 71505  | 71505  | -2617 | 19469 | AN4617 |
| 1855 | CONTIG79 | 68643  | 69132  | 1.04 | 8.63E-02 | transcription_start_site | + | 72525  | 72525  | -3637 | 19470 | AN4618 |
| 1855 | CONTIG79 | 68643  | 69132  | 1.04 | 8.63E-02 | transcription_start_site | + | 72637  | 72637  | -3749 | 19471 | AN4618 |
| 477  | CONTIG79 | 84906  | 85250  | 2.34 | 2.69E-04 | transcription_start_site | + | 84301  | 84301  | 777   | 19483 | AN4621 |
| 477  | CONTIG79 | 84906  | 85250  | 2.34 | 2.69E-04 | transcription_start_site | + | 88024  | 88024  | -2946 | 19484 | AN4622 |
| 477  | CONTIG79 | 84906  | 85250  | 2.34 | 2.69E-04 | transcription_start_site | + | 88647  | 88647  | -3569 | 19485 | AN4622 |
| 675  | CONTIG79 | 86626  | 87520  | 2.07 | 7.31E-04 | transcription_start_site | + | 88024  | 88024  | -951  | 19484 | AN4622 |
| 675  | CONTIG79 | 86626  | 87520  | 2.07 | 7.31E-04 | transcription_start_site | + | 88647  | 88647  | -1574 | 19485 | AN4622 |
| 477  | CONTIG79 | 84906  | 85250  | 2.34 | 2.69E-04 | transcription_start_site | + | 90167  | 90167  | -5089 | 19486 | AN4623 |
| 675  | CONTIG79 | 86626  | 87520  | 2.07 | 7.31E-04 | transcription_start_site | + | 90167  | 90167  | -3094 | 19486 | AN4623 |
| 675  | CONTIG79 | 86626  | 87520  | 2.07 | 7.31E-04 | transcription_start_site | + | 90376  | 90376  | -3303 | 19487 | AN4623 |
| 675  | CONTIG79 | 86626  | 87520  | 2.07 | 7.31E-04 | transcription_start_site | + | 90785  | 90785  | -3712 | 19488 | AN4623 |
| 675  | CONTIG79 | 86626  | 87520  | 2.07 | 7.31E-04 | transcription_start_site | + | 91651  | 91651  | -4578 | 19489 | AN4623 |
| 675  | CONTIG79 | 86626  | 87520  | 2.07 | 7.31E-04 | transcription_start_site | + | 91961  | 91961  | -4888 | 19490 | AN4623 |
| 1692 | CONTIG79 | 123826 | 124325 | 1.14 | 6.04E-02 | transcription_start_site | - | 121335 | 121335 | -2740 | 19521 | AN4634 |
| 1692 | CONTIG79 | 123826 | 124325 | 1.14 | 6.04E-02 | transcription_start_site | - | 121028 | 121028 | -3047 | 19522 | AN4634 |
| 1692 | CONTIG79 | 123826 | 124325 | 1.14 | 6.04E-02 | transcription_start_site | - | 120811 | 120811 | -3264 | 19523 | AN4634 |
| 1692 | CONTIG79 | 123826 | 124325 | 1.14 | 6.04E-02 | transcription_start_site | - | 119920 | 119920 | -4155 | 19524 | AN4634 |
| 1228 | CONTIG79 | 129002 | 129356 | 1.5  | 1.54E-02 | transcription_start_site | - | 128609 | 128609 | -570  | 19525 | AN4636 |
| 1228 | CONTIG79 | 129002 | 129356 | 1.5  | 1.54E-02 | transcription_start_site | - | 128423 | 128423 | -756  | 19526 | AN4636 |
| 1228 | CONTIG79 | 129002 | 129356 | 1.5  | 1.54E-02 | transcription_start_site | - | 127759 | 127759 | -1420 | 19527 | AN4636 |
| 1903 | CONTIG79 | 132157 | 132508 | 1    | 5.49E-02 | transcription_start_site | - | 128609 | 128609 | -3723 | 19525 | AN4636 |
| 1903 | CONTIG79 | 132157 | 132508 | 1    | 5.49E-02 | transcription_start_site | - | 128423 | 128423 | -3909 | 19526 | AN4636 |
| 1903 | CONTIG79 | 132157 | 132508 | 1    | 5.49E-02 | transcription_start_site | - | 127759 | 127759 | -4573 | 19527 | AN4636 |
| 1228 | CONTIG79 | 129002 | 129356 | 1.5  | 1.54E-02 | transcription_start_site | - | 129325 | 129325 | 146   | 19529 | AN4637 |

|      |          |        |        |      |          |                          |   |        |        |       |       |        |
|------|----------|--------|--------|------|----------|--------------------------|---|--------|--------|-------|-------|--------|
| 1903 | CONTIG79 | 132157 | 132508 | 1    | 5.49E-02 | transcription_start_site | - | 131487 | 131487 | -845  | 19528 | AN4637 |
| 1903 | CONTIG79 | 132157 | 132508 | 1    | 5.49E-02 | transcription_start_site | - | 129325 | 129325 | -3007 | 19529 | AN4637 |
| 1228 | CONTIG79 | 129002 | 129356 | 1.5  | 1.54E-02 | transcription_start_site | + | 133141 | 133141 | -3962 | 19530 | AN4638 |
| 1228 | CONTIG79 | 129002 | 129356 | 1.5  | 1.54E-02 | transcription_start_site | + | 133472 | 133472 | -4293 | 19531 | AN4638 |
| 1903 | CONTIG79 | 132157 | 132508 | 1    | 5.49E-02 | transcription_start_site | + | 133141 | 133141 | -808  | 19530 | AN4638 |
| 1903 | CONTIG79 | 132157 | 132508 | 1    | 5.49E-02 | transcription_start_site | + | 133472 | 133472 | -1139 | 19531 | AN4638 |
| 861  | CONTIG79 | 159601 | 160192 | 1.87 | 1.53E-03 | transcription_start_site | - | 159281 | 159281 | -615  | 19547 | AN4642 |
| 861  | CONTIG79 | 159601 | 160192 | 1.87 | 1.53E-03 | transcription_start_site | - | 159088 | 159088 | -808  | 19548 | AN4642 |
| 861  | CONTIG79 | 159601 | 160192 | 1.87 | 1.53E-03 | transcription_start_site | - | 158757 | 158757 | -1139 | 19549 | AN4642 |
| 861  | CONTIG79 | 159601 | 160192 | 1.87 | 1.53E-03 | transcription_start_site | - | 158555 | 158555 | -1341 | 19550 | AN4642 |
| 861  | CONTIG79 | 159601 | 160192 | 1.87 | 1.53E-03 | transcription_start_site | - | 158236 | 158236 | -1660 | 19551 | AN4642 |
| 1373 | CONTIG79 | 176257 | 176906 | 1.37 | 1.30E-02 | transcription_start_site | - | 172809 | 172809 | -3772 | 19566 | AN4648 |
| 1373 | CONTIG79 | 176257 | 176906 | 1.37 | 1.30E-02 | transcription_start_site | + | 176922 | 176922 | -340  | 19570 | AN4650 |
| 1373 | CONTIG79 | 176257 | 176906 | 1.37 | 1.30E-02 | transcription_start_site | + | 177189 | 177189 | -607  | 19571 | AN4650 |
| 2295 | CONTIG79 | 188867 | 190476 | 0.67 | 7.77E-02 | transcription_start_site | + | 190170 | 190170 | -498  | 19572 | AN4652 |
| 2295 | CONTIG79 | 188867 | 190476 | 0.67 | 7.77E-02 | transcription_start_site | + | 190292 | 190292 | -620  | 19573 | AN4652 |
| 1501 | CONTIG79 | 195317 | 195583 | 1.27 | 3.70E-02 | transcription_start_site | - | 192781 | 192781 | -2669 | 19574 | AN4653 |
| 1501 | CONTIG79 | 195317 | 195583 | 1.27 | 3.70E-02 | transcription_start_site | - | 192592 | 192592 | -2858 | 19575 | AN4653 |
| 1501 | CONTIG79 | 195317 | 195583 | 1.27 | 3.70E-02 | transcription_start_site | - | 192287 | 192287 | -3163 | 19576 | AN4653 |
| 1501 | CONTIG79 | 195317 | 195583 | 1.27 | 3.70E-02 | transcription_start_site | - | 191950 | 191950 | -3500 | 19577 | AN4653 |
| 1601 | CONTIG79 | 192692 | 193113 | 1.2  | 2.30E-02 | transcription_start_site | - | 192781 | 192781 | -121  | 19574 | AN4653 |
| 1601 | CONTIG79 | 192692 | 193113 | 1.2  | 2.30E-02 | transcription_start_site | - | 192592 | 192592 | -310  | 19575 | AN4653 |
| 1601 | CONTIG79 | 192692 | 193113 | 1.2  | 2.30E-02 | transcription_start_site | - | 192287 | 192287 | -615  | 19576 | AN4653 |
| 1601 | CONTIG79 | 192692 | 193113 | 1.2  | 2.30E-02 | transcription_start_site | - | 191950 | 191950 | -952  | 19577 | AN4653 |
| 1798 | CONTIG79 | 196738 | 197167 | 1.07 | 4.21E-02 | transcription_start_site | - | 192781 | 192781 | -4171 | 19574 | AN4653 |
| 1798 | CONTIG79 | 196738 | 197167 | 1.07 | 4.21E-02 | transcription_start_site | - | 192592 | 192592 | -4360 | 19575 | AN4653 |
| 1798 | CONTIG79 | 196738 | 197167 | 1.07 | 4.21E-02 | transcription_start_site | - | 192287 | 192287 | -4665 | 19576 | AN4653 |
| 1798 | CONTIG79 | 196738 | 197167 | 1.07 | 4.21E-02 | transcription_start_site | - | 191950 | 191950 | -5002 | 19577 | AN4653 |
| 1964 | CONTIG79 | 197253 | 197768 | 0.97 | 1.08E-01 | transcription_start_site | - | 192781 | 192781 | -4729 | 19574 | AN4653 |
| 1964 | CONTIG79 | 197253 | 197768 | 0.97 | 1.08E-01 | transcription_start_site | - | 192592 | 192592 | -4918 | 19575 | AN4653 |
| 1964 | CONTIG79 | 197253 | 197768 | 0.97 | 1.08E-01 | transcription_start_site | - | 192287 | 192287 | -5223 | 19576 | AN4653 |
| 1501 | CONTIG79 | 195317 | 195583 | 1.27 | 3.70E-02 | transcription_start_site | - | 194993 | 194993 | -457  | 19578 | AN4654 |
| 1501 | CONTIG79 | 195317 | 195583 | 1.27 | 3.70E-02 | transcription_start_site | - | 194112 | 194112 | -1338 | 19579 | AN4654 |
| 1601 | CONTIG79 | 192692 | 193113 | 1.2  | 2.30E-02 | transcription_start_site | - | 194112 | 194112 | 1209  | 19579 | AN4654 |
| 1798 | CONTIG79 | 196738 | 197167 | 1.07 | 4.21E-02 | transcription_start_site | - | 194993 | 194993 | -1959 | 19578 | AN4654 |
| 1798 | CONTIG79 | 196738 | 197167 | 1.07 | 4.21E-02 | transcription_start_site | - | 194112 | 194112 | -2840 | 19579 | AN4654 |
| 1964 | CONTIG79 | 197253 | 197768 | 0.97 | 1.08E-01 | transcription_start_site | - | 194993 | 194993 | -2517 | 19578 | AN4654 |
| 1964 | CONTIG79 | 197253 | 197768 | 0.97 | 1.08E-01 | transcription_start_site | - | 194112 | 194112 | -3398 | 19579 | AN4654 |
| 1501 | CONTIG79 | 195317 | 195583 | 1.27 | 3.70E-02 | transcription_start_site | - | 196326 | 196326 | 876   | 19582 | AN4655 |
| 1501 | CONTIG79 | 195317 | 195583 | 1.27 | 3.70E-02 | transcription_start_site | - | 196449 | 196449 | 999   | 19581 | AN4655 |
| 1798 | CONTIG79 | 196738 | 197167 | 1.07 | 4.21E-02 | transcription_start_site | - | 196824 | 196824 | -128  | 19580 | AN4655 |
| 1798 | CONTIG79 | 196738 | 197167 | 1.07 | 4.21E-02 | transcription_start_site | - | 196449 | 196449 | -503  | 19581 | AN4655 |
| 1798 | CONTIG79 | 196738 | 197167 | 1.07 | 4.21E-02 | transcription_start_site | - | 196326 | 196326 | -626  | 19582 | AN4655 |
| 1964 | CONTIG79 | 197253 | 197768 | 0.97 | 1.08E-01 | transcription_start_site | - | 196824 | 196824 | -686  | 19580 | AN4655 |
| 1964 | CONTIG79 | 197253 | 197768 | 0.97 | 1.08E-01 | transcription_start_site | - | 196449 | 196449 | -1061 | 19581 | AN4655 |
| 1964 | CONTIG79 | 197253 | 197768 | 0.97 | 1.08E-01 | transcription_start_site | - | 196326 | 196326 | -1184 | 19582 | AN4655 |
| 976  | CONTIG79 | 202143 | 202563 | 1.74 | 7.08E-03 | transcription_start_site | - | 201793 | 201793 | -560  | 19583 | AN4657 |
| 976  | CONTIG79 | 202143 | 202563 | 1.74 | 7.08E-03 | transcription_start_site | - | 201285 | 201285 | -1068 | 19584 | AN4657 |
| 976  | CONTIG79 | 202143 | 202563 | 1.74 | 7.08E-03 | transcription_start_site | - | 200784 | 200784 | -1569 | 19585 | AN4657 |
| 976  | CONTIG79 | 202143 | 202563 | 1.74 | 7.08E-03 | transcription_start_site | + | 203932 | 203932 | -1579 | 19586 | AN4658 |
| 976  | CONTIG79 | 202143 | 202563 | 1.74 | 7.08E-03 | transcription_start_site | + | 205750 | 205750 | -3397 | 19587 | AN4659 |
| 976  | CONTIG79 | 202143 | 202563 | 1.74 | 7.08E-03 | transcription_start_site | + | 205947 | 205947 | -3594 | 19588 | AN4659 |
| 976  | CONTIG79 | 202143 | 202563 | 1.74 | 7.08E-03 | transcription_start_site | + | 206091 | 206091 | -3738 | 19589 | AN4659 |
| 976  | CONTIG79 | 202143 | 202563 | 1.74 | 7.08E-03 | transcription_start_site | + | 206341 | 206341 | -3988 | 19590 | AN4659 |
| 976  | CONTIG79 | 202143 | 202563 | 1.74 | 7.08E-03 | transcription_start_site | + | 207461 | 207461 | -5108 | 19591 | AN4659 |
| 607  | CONTIG80 | 16819  | 17167  | 2.18 | 4.57E-03 | transcription_start_site | - | 16873  | 16873  | -120  | 19623 | AN4668 |
| 607  | CONTIG80 | 16819  | 17167  | 2.18 | 4.57E-03 | transcription_start_site | - | 16760  | 16760  | -233  | 19624 | AN4668 |

|      |          |        |        |      |          |                          |   |        |        |       |       |        |
|------|----------|--------|--------|------|----------|--------------------------|---|--------|--------|-------|-------|--------|
| 607  | CONTIG80 | 16819  | 17167  | 2.18 | 4.57E-03 | transcription_start_site | - | 16656  | 16656  | -337  | 19625 | AN4668 |
| 607  | CONTIG80 | 16819  | 17167  | 2.18 | 4.57E-03 | transcription_start_site | - | 16448  | 16448  | -545  | 19626 | AN4668 |
| 607  | CONTIG80 | 16819  | 17167  | 2.18 | 4.57E-03 | transcription_start_site | - | 16341  | 16341  | -652  | 19627 | AN4668 |
| 607  | CONTIG80 | 16819  | 17167  | 2.18 | 4.57E-03 | transcription_start_site | - | 16133  | 16133  | -860  | 19628 | AN4668 |
| 607  | CONTIG80 | 16819  | 17167  | 2.18 | 4.57E-03 | transcription_start_site | - | 15566  | 15566  | -1427 | 19629 | AN4668 |
| 79   | CONTIG80 | 32939  | 33433  | 3.14 | 0.00E+00 | transcription_start_site | - | 29515  | 29515  | -3671 | 19644 | AN4673 |
| 79   | CONTIG80 | 32939  | 33433  | 3.14 | 0.00E+00 | transcription_start_site | - | 28929  | 28929  | -4257 | 19645 | AN4673 |
| 79   | CONTIG80 | 32939  | 33433  | 3.14 | 0.00E+00 | transcription_start_site | - | 28397  | 28397  | -4789 | 19646 | AN4673 |
| 79   | CONTIG80 | 32939  | 33433  | 3.14 | 0.00E+00 | transcription_start_site | - | 31664  | 31664  | -1522 | 19647 | AN4674 |
| 79   | CONTIG80 | 32939  | 33433  | 3.14 | 0.00E+00 | transcription_start_site | - | 31495  | 31495  | -1691 | 19648 | AN4674 |
| 79   | CONTIG80 | 32939  | 33433  | 3.14 | 0.00E+00 | transcription_start_site | - | 31156  | 31156  | -2030 | 19649 | AN4674 |
| 79   | CONTIG80 | 32939  | 33433  | 3.14 | 0.00E+00 | transcription_start_site | - | 30614  | 30614  | -2572 | 19650 | AN4674 |
| 630  | CONTIG80 | 35037  | 35601  | 2.14 | 5.08E-03 | transcription_start_site | - | 31664  | 31664  | -3655 | 19647 | AN4674 |
| 630  | CONTIG80 | 35037  | 35601  | 2.14 | 5.08E-03 | transcription_start_site | - | 31495  | 31495  | -3824 | 19648 | AN4674 |
| 630  | CONTIG80 | 35037  | 35601  | 2.14 | 5.08E-03 | transcription_start_site | - | 31156  | 31156  | -4163 | 19649 | AN4674 |
| 630  | CONTIG80 | 35037  | 35601  | 2.14 | 5.08E-03 | transcription_start_site | - | 30614  | 30614  | -4705 | 19650 | AN4674 |
| 79   | CONTIG80 | 32939  | 33433  | 3.14 | 0.00E+00 | transcription_start_site | + | 32486  | 32486  | 700   | 19652 | AN4675 |
| 79   | CONTIG80 | 32939  | 33433  | 3.14 | 0.00E+00 | transcription_start_site | + | 32122  | 32122  | 1064  | 19651 | AN4675 |
| 630  | CONTIG80 | 35037  | 35601  | 2.14 | 5.08E-03 | transcription_start_site | - | 36432  | 36432  | 1113  | 19656 | AN4676 |
| 1933 | CONTIG80 | 44267  | 44831  | 0.99 | 1.76E-01 | transcription_start_site | - | 41021  | 41021  | -3528 | 19657 | AN4677 |
| 1933 | CONTIG80 | 44267  | 44831  | 0.99 | 1.76E-01 | transcription_start_site | - | 40823  | 40823  | -3726 | 19658 | AN4677 |
| 18   | CONTIG80 | 46202  | 46551  | 3.45 | 0.00E+00 | transcription_start_site | - | 44387  | 44387  | -1989 | 19659 | AN4678 |
| 1933 | CONTIG80 | 44267  | 44831  | 0.99 | 1.76E-01 | transcription_start_site | - | 44387  | 44387  | -162  | 19659 | AN4678 |
| 18   | CONTIG80 | 46202  | 46551  | 3.45 | 0.00E+00 | transcription_start_site | + | 48283  | 48283  | -1906 | 19660 | AN4680 |
| 18   | CONTIG80 | 46202  | 46551  | 3.45 | 0.00E+00 | transcription_start_site | + | 48504  | 48504  | -2127 | 19661 | AN4680 |
| 18   | CONTIG80 | 46202  | 46551  | 3.45 | 0.00E+00 | transcription_start_site | + | 48607  | 48607  | -2230 | 19662 | AN4680 |
| 1933 | CONTIG80 | 44267  | 44831  | 0.99 | 1.76E-01 | transcription_start_site | + | 48283  | 48283  | -3734 | 19660 | AN4680 |
| 1933 | CONTIG80 | 44267  | 44831  | 0.99 | 1.76E-01 | transcription_start_site | + | 48504  | 48504  | -3955 | 19661 | AN4680 |
| 1933 | CONTIG80 | 44267  | 44831  | 0.99 | 1.76E-01 | transcription_start_site | + | 48607  | 48607  | -4058 | 19662 | AN4680 |
| 18   | CONTIG80 | 46202  | 46551  | 3.45 | 0.00E+00 | transcription_start_site | + | 50646  | 50646  | -4269 | 19663 | AN4681 |
| 18   | CONTIG80 | 46202  | 46551  | 3.45 | 0.00E+00 | transcription_start_site | + | 50760  | 50760  | -4383 | 19664 | AN4681 |
| 1746 | CONTIG80 | 73669  | 73943  | 1.11 | 1.22E-01 | transcription_start_site | - | 69027  | 69027  | -4779 | 19689 | AN4689 |
| 1746 | CONTIG80 | 73669  | 73943  | 1.11 | 1.22E-01 | transcription_start_site | - | 68875  | 68875  | -4931 | 19690 | AN4689 |
| 1746 | CONTIG80 | 73669  | 73943  | 1.11 | 1.22E-01 | transcription_start_site | + | 74482  | 74482  | -676  | 19696 | AN4691 |
| 1746 | CONTIG80 | 73669  | 73943  | 1.11 | 1.22E-01 | transcription_start_site | + | 74932  | 74932  | -1126 | 19697 | AN4691 |
| 1746 | CONTIG80 | 73669  | 73943  | 1.11 | 1.22E-01 | transcription_start_site | + | 75097  | 75097  | -1291 | 19698 | AN4691 |
| 1746 | CONTIG80 | 73669  | 73943  | 1.11 | 1.22E-01 | transcription_start_site | + | 75587  | 75587  | -1781 | 19699 | AN4691 |
| 1802 | CONTIG80 | 75619  | 76050  | 1.07 | 8.54E-02 | transcription_start_site | + | 75587  | 75587  | 247   | 19699 | AN4691 |
| 1802 | CONTIG80 | 75619  | 76050  | 1.07 | 8.54E-02 | transcription_start_site | + | 75097  | 75097  | 737   | 19698 | AN4691 |
| 1802 | CONTIG80 | 75619  | 76050  | 1.07 | 8.54E-02 | transcription_start_site | + | 74932  | 74932  | 902   | 19697 | AN4691 |
| 1219 | CONTIG80 | 77719  | 78139  | 1.51 | 1.83E-02 | transcription_start_site | + | 78760  | 78760  | -831  | 19700 | AN4692 |
| 1219 | CONTIG80 | 77719  | 78139  | 1.51 | 1.83E-02 | transcription_start_site | + | 78937  | 78937  | -1008 | 19701 | AN4692 |
| 1219 | CONTIG80 | 77719  | 78139  | 1.51 | 1.83E-02 | transcription_start_site | + | 79864  | 79864  | -1935 | 19702 | AN4692 |
| 1746 | CONTIG80 | 73669  | 73943  | 1.11 | 1.22E-01 | transcription_start_site | + | 78760  | 78760  | -4954 | 19700 | AN4692 |
| 1746 | CONTIG80 | 73669  | 73943  | 1.11 | 1.22E-01 | transcription_start_site | + | 78937  | 78937  | -5131 | 19701 | AN4692 |
| 1802 | CONTIG80 | 75619  | 76050  | 1.07 | 8.54E-02 | transcription_start_site | + | 78760  | 78760  | -2925 | 19700 | AN4692 |
| 1802 | CONTIG80 | 75619  | 76050  | 1.07 | 8.54E-02 | transcription_start_site | + | 78937  | 78937  | -3102 | 19701 | AN4692 |
| 1802 | CONTIG80 | 75619  | 76050  | 1.07 | 8.54E-02 | transcription_start_site | + | 79864  | 79864  | -4029 | 19702 | AN4692 |
| 657  | CONTIG80 | 93243  | 93526  | 2.1  | 6.24E-03 | transcription_start_site | - | 90854  | 90854  | -2530 | 19706 | AN4695 |
| 657  | CONTIG80 | 93243  | 93526  | 2.1  | 6.24E-03 | transcription_start_site | - | 90700  | 90700  | -2684 | 19707 | AN4695 |
| 898  | CONTIG80 | 101553 | 101842 | 1.83 | 1.37E-02 | transcription_start_site | - | 98542  | 98542  | -3155 | 19708 | AN4696 |
| 898  | CONTIG80 | 101553 | 101842 | 1.83 | 1.37E-02 | transcription_start_site | - | 98417  | 98417  | -3280 | 19709 | AN4696 |
| 898  | CONTIG80 | 101553 | 101842 | 1.83 | 1.37E-02 | transcription_start_site | - | 101522 | 101522 | -175  | 19710 | AN4697 |
| 898  | CONTIG80 | 101553 | 101842 | 1.83 | 1.37E-02 | transcription_start_site | - | 101361 | 101361 | -336  | 19711 | AN4697 |
| 898  | CONTIG80 | 101553 | 101842 | 1.83 | 1.37E-02 | transcription_start_site | - | 100813 | 100813 | -884  | 19712 | AN4697 |
| 898  | CONTIG80 | 101553 | 101842 | 1.83 | 1.37E-02 | transcription_start_site | - | 100511 | 100511 | -1186 | 19713 | AN4697 |
| 1010 | CONTIG80 | 105692 | 105951 | 1.71 | 2.05E-02 | transcription_start_site | - | 101522 | 101522 | -4299 | 19710 | AN4697 |

|      |          |        |        |      |          |                          |   |        |        |       |       |        |
|------|----------|--------|--------|------|----------|--------------------------|---|--------|--------|-------|-------|--------|
| 1010 | CONTIG80 | 105692 | 105951 | 1.71 | 2.05E-02 | transcription_start_site | - | 101361 | 101361 | -4460 | 19711 | AN4697 |
| 1010 | CONTIG80 | 105692 | 105951 | 1.71 | 2.05E-02 | transcription_start_site | - | 100813 | 100813 | -5008 | 19712 | AN4697 |
| 65   | CONTIG80 | 109658 | 109927 | 3.18 | 0.00E+00 | transcription_start_site | + | 110463 | 110463 | -670  | 19714 | AN4698 |
| 65   | CONTIG80 | 109658 | 109927 | 3.18 | 0.00E+00 | transcription_start_site | + | 112214 | 112214 | -2421 | 19715 | AN4698 |
| 1010 | CONTIG80 | 105692 | 105951 | 1.71 | 2.05E-02 | transcription_start_site | + | 110463 | 110463 | -4641 | 19714 | AN4698 |
| 1084 | CONTIG80 | 119860 | 120279 | 1.63 | 2.63E-02 | transcription_start_site | + | 123054 | 123054 | -2984 | 19716 | AN4699 |
| 1084 | CONTIG80 | 119860 | 120279 | 1.63 | 2.63E-02 | transcription_start_site | + | 124439 | 124439 | -4369 | 19717 | AN4699 |
| 1084 | CONTIG80 | 119860 | 120279 | 1.63 | 2.63E-02 | transcription_start_site | + | 125253 | 125253 | -5183 | 19718 | AN4699 |
| 93   | CONTIG80 | 126688 | 127102 | 3.1  | 0.00E+00 | transcription_start_site | + | 127282 | 127282 | -387  | 19719 | AN4700 |
| 93   | CONTIG80 | 126688 | 127102 | 3.1  | 0.00E+00 | transcription_start_site | + | 129159 | 129159 | -2264 | 19720 | AN4700 |
| 93   | CONTIG80 | 126688 | 127102 | 3.1  | 0.00E+00 | transcription_start_site | + | 132013 | 132013 | -5118 | 19723 | AN4702 |
| 814  | CONTIG80 | 173194 | 173758 | 1.91 | 4.22E-03 | transcription_start_site | - | 173402 | 173402 | -74   | 19754 | AN4713 |
| 814  | CONTIG80 | 173194 | 173758 | 1.91 | 4.22E-03 | transcription_start_site | - | 172762 | 172762 | -714  | 19755 | AN4713 |
| 1313 | CONTIG80 | 176644 | 177203 | 1.43 | 4.78E-02 | transcription_start_site | - | 173402 | 173402 | -3521 | 19754 | AN4713 |
| 1313 | CONTIG80 | 176644 | 177203 | 1.43 | 4.78E-02 | transcription_start_site | - | 172762 | 172762 | -4161 | 19755 | AN4713 |
| 1313 | CONTIG80 | 176644 | 177203 | 1.43 | 4.78E-02 | transcription_start_site | - | 175467 | 175467 | -1456 | 19756 | AN4714 |
| 1313 | CONTIG80 | 176644 | 177203 | 1.43 | 4.78E-02 | transcription_start_site | - | 175115 | 175115 | -1808 | 19757 | AN4714 |
| 814  | CONTIG80 | 173194 | 173758 | 1.91 | 4.22E-03 | transcription_start_site | + | 175617 | 175617 | -2141 | 19758 | AN4715 |
| 814  | CONTIG80 | 173194 | 173758 | 1.91 | 4.22E-03 | transcription_start_site | + | 175918 | 175918 | -2442 | 19759 | AN4715 |
| 1313 | CONTIG80 | 176644 | 177203 | 1.43 | 4.78E-02 | transcription_start_site | + | 175918 | 175918 | 1005  | 19759 | AN4715 |
| 814  | CONTIG80 | 173194 | 173758 | 1.91 | 4.22E-03 | transcription_start_site | + | 178020 | 178020 | -4544 | 19760 | AN4716 |
| 1313 | CONTIG80 | 176644 | 177203 | 1.43 | 4.78E-02 | transcription_start_site | + | 178020 | 178020 | -1096 | 19760 | AN4716 |
| 1313 | CONTIG80 | 176644 | 177203 | 1.43 | 4.78E-02 | transcription_start_site | + | 179133 | 179133 | -2209 | 19761 | AN4716 |
| 1996 | CONTIG80 | 183844 | 184328 | 0.95 | 1.97E-01 | transcription_start_site | - | 182441 | 182441 | -1645 | 19762 | AN4717 |
| 1996 | CONTIG80 | 183844 | 184328 | 0.95 | 1.97E-01 | transcription_start_site | - | 182126 | 182126 | -1960 | 19763 | AN4717 |
| 1996 | CONTIG80 | 183844 | 184328 | 0.95 | 1.97E-01 | transcription_start_site | - | 181969 | 181969 | -2117 | 19764 | AN4717 |
| 1996 | CONTIG80 | 183844 | 184328 | 0.95 | 1.97E-01 | transcription_start_site | - | 181790 | 181790 | -2296 | 19765 | AN4717 |
| 1996 | CONTIG80 | 183844 | 184328 | 0.95 | 1.97E-01 | transcription_start_site | - | 184069 | 184069 | -17   | 19767 | AN4718 |
| 1996 | CONTIG80 | 183844 | 184328 | 0.95 | 1.97E-01 | transcription_start_site | - | 183871 | 183871 | -215  | 19768 | AN4718 |
| 1996 | CONTIG80 | 183844 | 184328 | 0.95 | 1.97E-01 | transcription_start_site | - | 184406 | 184406 | 320   | 19766 | AN4718 |
| 1996 | CONTIG80 | 183844 | 184328 | 0.95 | 1.97E-01 | transcription_start_site | - | 183762 | 183762 | -324  | 19769 | AN4718 |
| 1996 | CONTIG80 | 183844 | 184328 | 0.95 | 1.97E-01 | transcription_start_site | - | 183578 | 183578 | -508  | 19770 | AN4718 |
| 1996 | CONTIG80 | 183844 | 184328 | 0.95 | 1.97E-01 | transcription_start_site | - | 183410 | 183410 | -676  | 19771 | AN4718 |
| 1996 | CONTIG80 | 183844 | 184328 | 0.95 | 1.97E-01 | transcription_start_site | - | 183272 | 183272 | -814  | 19772 | AN4718 |
| 1996 | CONTIG80 | 183844 | 184328 | 0.95 | 1.97E-01 | transcription_start_site | - | 183133 | 183133 | -953  | 19773 | AN4718 |
| 1996 | CONTIG80 | 183844 | 184328 | 0.95 | 1.97E-01 | transcription_start_site | + | 184883 | 184883 | -797  | 19774 | AN4719 |
| 1996 | CONTIG80 | 183844 | 184328 | 0.95 | 1.97E-01 | transcription_start_site | + | 187583 | 187583 | -3497 | 19775 | AN4719 |
| 1996 | CONTIG80 | 183844 | 184328 | 0.95 | 1.97E-01 | transcription_start_site | + | 188065 | 188065 | -3979 | 19776 | AN4719 |
| 1996 | CONTIG80 | 183844 | 184328 | 0.95 | 1.97E-01 | transcription_start_site | + | 188545 | 188545 | -4459 | 19777 | AN4719 |
| 80   | CONTIG80 | 191780 | 192134 | 3.14 | 0.00E+00 | transcription_start_site | - | 191056 | 191056 | -901  | 19778 | AN4720 |
| 80   | CONTIG80 | 191780 | 192134 | 3.14 | 0.00E+00 | transcription_start_site | - | 190843 | 190843 | -1114 | 19779 | AN4720 |
| 80   | CONTIG80 | 191780 | 192134 | 3.14 | 0.00E+00 | transcription_start_site | - | 190352 | 190352 | -1605 | 19780 | AN4720 |
| 1747 | CONTIG80 | 202519 | 202853 | 1.11 | 1.22E-01 | transcription_start_site | - | 198795 | 198795 | -3891 | 19782 | AN4722 |
| 1747 | CONTIG80 | 202519 | 202853 | 1.11 | 1.22E-01 | transcription_start_site | + | 206616 | 206616 | -3930 | 19786 | AN4724 |
| 1747 | CONTIG80 | 202519 | 202853 | 1.11 | 1.22E-01 | transcription_start_site | + | 206719 | 206719 | -4033 | 19787 | AN4724 |
| 1747 | CONTIG80 | 202519 | 202853 | 1.11 | 1.22E-01 | transcription_start_site | + | 206827 | 206827 | -4141 | 19788 | AN4724 |
| 1747 | CONTIG80 | 202519 | 202853 | 1.11 | 1.22E-01 | transcription_start_site | + | 206974 | 206974 | -4288 | 19789 | AN4724 |
| 1747 | CONTIG80 | 202519 | 202853 | 1.11 | 1.22E-01 | transcription_start_site | + | 207173 | 207173 | -4487 | 19790 | AN4724 |
| 1747 | CONTIG80 | 202519 | 202853 | 1.11 | 1.22E-01 | transcription_start_site | + | 207427 | 207427 | -4741 | 19791 | AN4724 |
| 1444 | CONTIG80 | 213683 | 214032 | 1.31 | 6.74E-02 | transcription_start_site | - | 209998 | 209998 | -3859 | 19793 | AN4725 |
| 1444 | CONTIG80 | 213683 | 214032 | 1.31 | 6.74E-02 | transcription_start_site | - | 213105 | 213105 | -752  | 19796 | AN4727 |
| 1444 | CONTIG80 | 213683 | 214032 | 1.31 | 6.74E-02 | transcription_start_site | - | 213026 | 213026 | -831  | 19797 | AN4727 |
| 1444 | CONTIG80 | 213683 | 214032 | 1.31 | 6.74E-02 | transcription_start_site | - | 212729 | 212729 | -1128 | 19798 | AN4727 |
| 1444 | CONTIG80 | 213683 | 214032 | 1.31 | 6.74E-02 | transcription_start_site | - | 212217 | 212217 | -1640 | 19799 | AN4727 |
| 1444 | CONTIG80 | 213683 | 214032 | 1.31 | 6.74E-02 | transcription_start_site | - | 214035 | 214035 | 177   | 19803 | AN4728 |
| 1444 | CONTIG80 | 213683 | 214032 | 1.31 | 6.74E-02 | transcription_start_site | - | 214773 | 214773 | 915   | 19802 | AN4728 |
| 1934 | CONTIG80 | 218555 | 218834 | 0.99 | 1.76E-01 | transcription_start_site | - | 216877 | 216877 | -1817 | 19800 | AN4728 |

|      |          |        |        |      |          |                          |   |        |        |       |       |        |
|------|----------|--------|--------|------|----------|--------------------------|---|--------|--------|-------|-------|--------|
| 1934 | CONTIG80 | 218555 | 218834 | 0.99 | 1.76E-01 | transcription_start_site | - | 216272 | 216272 | -2422 | 19801 | AN4728 |
| 1934 | CONTIG80 | 218555 | 218834 | 0.99 | 1.76E-01 | transcription_start_site | - | 214773 | 214773 | -3921 | 19802 | AN4728 |
| 1934 | CONTIG80 | 218555 | 218834 | 0.99 | 1.76E-01 | transcription_start_site | - | 214035 | 214035 | -4659 | 19803 | AN4728 |
| 1934 | CONTIG80 | 218555 | 218834 | 0.99 | 1.76E-01 | transcription_start_site | - | 218579 | 218579 | -115  | 19804 | AN4729 |
| 1934 | CONTIG80 | 218555 | 218834 | 0.99 | 1.76E-01 | transcription_start_site | - | 218266 | 218266 | -428  | 19805 | AN4729 |
| 1934 | CONTIG80 | 218555 | 218834 | 0.99 | 1.76E-01 | transcription_start_site | + | 221268 | 221268 | -2573 | 19809 | AN4731 |
| 1934 | CONTIG80 | 218555 | 218834 | 0.99 | 1.76E-01 | transcription_start_site | + | 221341 | 221341 | -2646 | 19810 | AN4731 |
| 1934 | CONTIG80 | 218555 | 218834 | 0.99 | 1.76E-01 | transcription_start_site | + | 221851 | 221851 | -3156 | 19811 | AN4731 |
| 1011 | CONTIG80 | 225679 | 225958 | 1.71 | 2.05E-02 | transcription_start_site | - | 223794 | 223794 | -2024 | 19812 | AN4732 |
| 1011 | CONTIG80 | 225679 | 225958 | 1.71 | 2.05E-02 | transcription_start_site | - | 223220 | 223220 | -2598 | 19813 | AN4732 |
| 1011 | CONTIG80 | 225679 | 225958 | 1.71 | 2.05E-02 | transcription_start_site | - | 223079 | 223079 | -2739 | 19814 | AN4732 |
| 1011 | CONTIG80 | 225679 | 225958 | 1.71 | 2.05E-02 | transcription_start_site | + | 226461 | 226461 | -642  | 19815 | AN4733 |
| 1011 | CONTIG80 | 225679 | 225958 | 1.71 | 2.05E-02 | transcription_start_site | + | 226542 | 226542 | -723  | 19816 | AN4733 |
| 1011 | CONTIG80 | 225679 | 225958 | 1.71 | 2.05E-02 | transcription_start_site | + | 226664 | 226664 | -845  | 19817 | AN4733 |
| 1011 | CONTIG80 | 225679 | 225958 | 1.71 | 2.05E-02 | transcription_start_site | + | 228215 | 228215 | -2396 | 19818 | AN4733 |
| 1011 | CONTIG80 | 225679 | 225958 | 1.71 | 2.05E-02 | transcription_start_site | + | 228628 | 228628 | -2809 | 19819 | AN4733 |
| 1011 | CONTIG80 | 225679 | 225958 | 1.71 | 2.05E-02 | transcription_start_site | + | 228802 | 228802 | -2983 | 19820 | AN4733 |
| 1011 | CONTIG80 | 225679 | 225958 | 1.71 | 2.05E-02 | transcription_start_site | + | 230913 | 230913 | -5094 | 19821 | AN4734 |
| 1988 | CONTIG80 | 257027 | 257836 | 0.95 | 1.34E-01 | transcription_start_site | - | 253852 | 253852 | -3579 | 19848 | AN4741 |
| 1988 | CONTIG80 | 257027 | 257836 | 0.95 | 1.34E-01 | transcription_start_site | - | 253172 | 253172 | -4259 | 19849 | AN4741 |
| 1988 | CONTIG80 | 257027 | 257836 | 0.95 | 1.34E-01 | transcription_start_site | - | 252530 | 252530 | -4901 | 19850 | AN4741 |
| 1988 | CONTIG80 | 257027 | 257836 | 0.95 | 1.34E-01 | transcription_start_site | + | 257579 | 257579 | -147  | 19858 | AN4742 |
| 1988 | CONTIG80 | 257027 | 257836 | 0.95 | 1.34E-01 | transcription_start_site | + | 257837 | 257837 | -405  | 19859 | AN4742 |
| 1988 | CONTIG80 | 257027 | 257836 | 0.95 | 1.34E-01 | transcription_start_site | + | 257991 | 257991 | -559  | 19860 | AN4742 |
| 1988 | CONTIG80 | 257027 | 257836 | 0.95 | 1.34E-01 | transcription_start_site | + | 258139 | 258139 | -707  | 19861 | AN4742 |
| 964  | CONTIG80 | 260795 | 261210 | 1.75 | 7.36E-03 | transcription_start_site | - | 260156 | 260156 | -846  | 19862 | AN4743 |
| 964  | CONTIG80 | 260795 | 261210 | 1.75 | 7.36E-03 | transcription_start_site | - | 260056 | 260056 | -946  | 19863 | AN4743 |
| 964  | CONTIG80 | 260795 | 261210 | 1.75 | 7.36E-03 | transcription_start_site | - | 259961 | 259961 | -1041 | 19864 | AN4743 |
| 964  | CONTIG80 | 260795 | 261210 | 1.75 | 7.36E-03 | transcription_start_site | - | 259839 | 259839 | -1163 | 19865 | AN4743 |
| 964  | CONTIG80 | 260795 | 261210 | 1.75 | 7.36E-03 | transcription_start_site | - | 259584 | 259584 | -1418 | 19866 | AN4743 |
| 964  | CONTIG80 | 260795 | 261210 | 1.75 | 7.36E-03 | transcription_start_site | - | 259292 | 259292 | -1710 | 19867 | AN4743 |
| 965  | CONTIG80 | 263787 | 264291 | 1.75 | 7.36E-03 | transcription_start_site | - | 260156 | 260156 | -3883 | 19862 | AN4743 |
| 965  | CONTIG80 | 263787 | 264291 | 1.75 | 7.36E-03 | transcription_start_site | - | 260056 | 260056 | -3983 | 19863 | AN4743 |
| 965  | CONTIG80 | 263787 | 264291 | 1.75 | 7.36E-03 | transcription_start_site | - | 259961 | 259961 | -4078 | 19864 | AN4743 |
| 965  | CONTIG80 | 263787 | 264291 | 1.75 | 7.36E-03 | transcription_start_site | - | 259839 | 259839 | -4200 | 19865 | AN4743 |
| 965  | CONTIG80 | 263787 | 264291 | 1.75 | 7.36E-03 | transcription_start_site | - | 259584 | 259584 | -4455 | 19866 | AN4743 |
| 965  | CONTIG80 | 263787 | 264291 | 1.75 | 7.36E-03 | transcription_start_site | - | 259292 | 259292 | -4747 | 19867 | AN4743 |
| 964  | CONTIG80 | 260795 | 261210 | 1.75 | 7.36E-03 | transcription_start_site | - | 261994 | 261994 | 991   | 19874 | AN4744 |
| 965  | CONTIG80 | 263787 | 264291 | 1.75 | 7.36E-03 | transcription_start_site | - | 263799 | 263799 | -240  | 19868 | AN4744 |
| 965  | CONTIG80 | 263787 | 264291 | 1.75 | 7.36E-03 | transcription_start_site | - | 263397 | 263397 | -642  | 19869 | AN4744 |
| 965  | CONTIG80 | 263787 | 264291 | 1.75 | 7.36E-03 | transcription_start_site | - | 263231 | 263231 | -808  | 19870 | AN4744 |
| 965  | CONTIG80 | 263787 | 264291 | 1.75 | 7.36E-03 | transcription_start_site | - | 263041 | 263041 | -998  | 19871 | AN4744 |
| 965  | CONTIG80 | 263787 | 264291 | 1.75 | 7.36E-03 | transcription_start_site | - | 262671 | 262671 | -1368 | 19872 | AN4744 |
| 965  | CONTIG80 | 263787 | 264291 | 1.75 | 7.36E-03 | transcription_start_site | - | 262377 | 262377 | -1662 | 19873 | AN4744 |
| 965  | CONTIG80 | 263787 | 264291 | 1.75 | 7.36E-03 | transcription_start_site | - | 261994 | 261994 | -2045 | 19874 | AN4744 |
| 964  | CONTIG80 | 260795 | 261210 | 1.75 | 7.36E-03 | transcription_start_site | + | 264399 | 264399 | -3396 | 19875 | AN4745 |
| 964  | CONTIG80 | 260795 | 261210 | 1.75 | 7.36E-03 | transcription_start_site | + | 264648 | 264648 | -3645 | 19876 | AN4745 |
| 964  | CONTIG80 | 260795 | 261210 | 1.75 | 7.36E-03 | transcription_start_site | + | 264775 | 264775 | -3772 | 19877 | AN4745 |
| 964  | CONTIG80 | 260795 | 261210 | 1.75 | 7.36E-03 | transcription_start_site | + | 265433 | 265433 | -4430 | 19878 | AN4745 |
| 964  | CONTIG80 | 260795 | 261210 | 1.75 | 7.36E-03 | transcription_start_site | + | 265688 | 265688 | -4685 | 19879 | AN4745 |
| 965  | CONTIG80 | 263787 | 264291 | 1.75 | 7.36E-03 | transcription_start_site | + | 264399 | 264399 | -360  | 19875 | AN4745 |
| 965  | CONTIG80 | 263787 | 264291 | 1.75 | 7.36E-03 | transcription_start_site | + | 264648 | 264648 | -609  | 19876 | AN4745 |
| 965  | CONTIG80 | 263787 | 264291 | 1.75 | 7.36E-03 | transcription_start_site | + | 264775 | 264775 | -736  | 19877 | AN4745 |
| 965  | CONTIG80 | 263787 | 264291 | 1.75 | 7.36E-03 | transcription_start_site | + | 265433 | 265433 | -1394 | 19878 | AN4745 |
| 965  | CONTIG80 | 263787 | 264291 | 1.75 | 7.36E-03 | transcription_start_site | + | 265688 | 265688 | -1649 | 19879 | AN4745 |
| 965  | CONTIG80 | 263787 | 264291 | 1.75 | 7.36E-03 | transcription_start_site | + | 266266 | 266266 | -2227 | 19880 | AN4745 |
| 965  | CONTIG80 | 263787 | 264291 | 1.75 | 7.36E-03 | transcription_start_site | + | 266465 | 266465 | -2426 | 19881 | AN4745 |



|      |          |        |        |      |          |                          |   |        |        |       |       |        |
|------|----------|--------|--------|------|----------|--------------------------|---|--------|--------|-------|-------|--------|
| 965  | CONTIG80 | 263787 | 264291 | 1.75 | 7.36E-03 | transcription_start_site | + | 266614 | 266614 | -2575 | 19882 | AN4745 |
| 965  | CONTIG80 | 263787 | 264291 | 1.75 | 7.36E-03 | transcription_start_site | + | 266734 | 266734 | -2695 | 19883 | AN4745 |
| 965  | CONTIG80 | 263787 | 264291 | 1.75 | 7.36E-03 | transcription_start_site | + | 269262 | 269262 | -5223 | 19887 | AN4747 |
| 899  | CONTIG80 | 295363 | 295935 | 1.83 | 1.37E-02 | transcription_start_site | - | 295029 | 295029 | -620  | 19924 | AN4758 |
| 899  | CONTIG80 | 295363 | 295935 | 1.83 | 1.37E-02 | transcription_start_site | - | 294922 | 294922 | -727  | 19925 | AN4758 |
| 899  | CONTIG80 | 295363 | 295935 | 1.83 | 1.37E-02 | transcription_start_site | - | 294769 | 294769 | -880  | 19926 | AN4758 |
| 899  | CONTIG80 | 295363 | 295935 | 1.83 | 1.37E-02 | transcription_start_site | - | 294724 | 294724 | -925  | 19927 | AN4758 |
| 899  | CONTIG80 | 295363 | 295935 | 1.83 | 1.37E-02 | transcription_start_site | + | 296518 | 296518 | -869  | 19928 | AN4759 |
| 899  | CONTIG80 | 295363 | 295935 | 1.83 | 1.37E-02 | transcription_start_site | + | 296587 | 296587 | -938  | 19929 | AN4759 |
| 899  | CONTIG80 | 295363 | 295935 | 1.83 | 1.37E-02 | transcription_start_site | + | 297259 | 297259 | -1610 | 19930 | AN4759 |
| 1806 | CONTIG80 | 326121 | 326375 | 1.07 | 1.38E-01 | transcription_start_site | - | 326094 | 326094 | -154  | 19956 | AN4768 |
| 1935 | CONTIG80 | 330081 | 330582 | 0.99 | 1.76E-01 | transcription_start_site | - | 326094 | 326094 | -4237 | 19956 | AN4768 |
| 793  | CONTIG80 | 333996 | 334475 | 1.95 | 9.96E-03 | transcription_start_site | - | 329454 | 329454 | -4781 | 19957 | AN4769 |
| 793  | CONTIG80 | 333996 | 334475 | 1.95 | 9.96E-03 | transcription_start_site | - | 329209 | 329209 | -5026 | 19958 | AN4769 |
| 793  | CONTIG80 | 333996 | 334475 | 1.95 | 9.96E-03 | transcription_start_site | - | 329034 | 329034 | -5201 | 19959 | AN4769 |
| 1935 | CONTIG80 | 330081 | 330582 | 0.99 | 1.76E-01 | transcription_start_site | - | 329454 | 329454 | -877  | 19957 | AN4769 |
| 1935 | CONTIG80 | 330081 | 330582 | 0.99 | 1.76E-01 | transcription_start_site | - | 329209 | 329209 | -1122 | 19958 | AN4769 |
| 1935 | CONTIG80 | 330081 | 330582 | 0.99 | 1.76E-01 | transcription_start_site | - | 329034 | 329034 | -1297 | 19959 | AN4769 |
| 1935 | CONTIG80 | 330081 | 330582 | 0.99 | 1.76E-01 | transcription_start_site | - | 328690 | 328690 | -1641 | 19960 | AN4769 |
| 1935 | CONTIG80 | 330081 | 330582 | 0.99 | 1.76E-01 | transcription_start_site | - | 328480 | 328480 | -1851 | 19961 | AN4769 |
| 1935 | CONTIG80 | 330081 | 330582 | 0.99 | 1.76E-01 | transcription_start_site | - | 328356 | 328356 | -1975 | 19962 | AN4769 |
| 793  | CONTIG80 | 333996 | 334475 | 1.95 | 9.96E-03 | transcription_start_site | - | 333487 | 333487 | -748  | 19963 | AN4770 |
| 1565 | CONTIG81 | 6376   | 6725   | 1.22 | 3.70E-02 | transcription_start_site | - | 6116   | 6116   | -434  | 19966 | AN4772 |
| 1565 | CONTIG81 | 6376   | 6725   | 1.22 | 3.70E-02 | transcription_start_site | - | 5746   | 5746   | -804  | 19967 | AN4772 |
| 1565 | CONTIG81 | 6376   | 6725   | 1.22 | 3.70E-02 | transcription_start_site | - | 5343   | 5343   | -1207 | 19968 | AN4772 |
| 1565 | CONTIG81 | 6376   | 6725   | 1.22 | 3.70E-02 | transcription_start_site | - | 4990   | 4990   | -1560 | 19969 | AN4772 |
| 1565 | CONTIG81 | 6376   | 6725   | 1.22 | 3.70E-02 | transcription_start_site | - | 4091   | 4091   | -2459 | 19970 | AN4772 |
| 1565 | CONTIG81 | 6376   | 6725   | 1.22 | 3.70E-02 | transcription_start_site | - | 7699   | 7699   | 1148  | 19978 | AN4773 |
| 1095 | CONTIG81 | 21005  | 21359  | 1.61 | 3.99E-03 | transcription_start_site | - | 16821  | 16821  | -4361 | 19986 | AN4776 |
| 1095 | CONTIG81 | 21005  | 21359  | 1.61 | 3.99E-03 | transcription_start_site | - | 16243  | 16243  | -4939 | 19987 | AN4776 |
| 1768 | CONTIG81 | 18540  | 18905  | 1.09 | 6.04E-02 | transcription_start_site | - | 16821  | 16821  | -1901 | 19986 | AN4776 |
| 1768 | CONTIG81 | 18540  | 18905  | 1.09 | 6.04E-02 | transcription_start_site | - | 16243  | 16243  | -2479 | 19987 | AN4776 |
| 1095 | CONTIG81 | 21005  | 21359  | 1.61 | 3.99E-03 | transcription_start_site | - | 18532  | 18532  | -2650 | 19988 | AN4777 |
| 1095 | CONTIG81 | 21005  | 21359  | 1.61 | 3.99E-03 | transcription_start_site | - | 18343  | 18343  | -2839 | 19989 | AN4777 |
| 1095 | CONTIG81 | 21005  | 21359  | 1.61 | 3.99E-03 | transcription_start_site | - | 18214  | 18214  | -2968 | 19990 | AN4777 |
| 1768 | CONTIG81 | 18540  | 18905  | 1.09 | 6.04E-02 | transcription_start_site | - | 18532  | 18532  | -190  | 19988 | AN4777 |
| 1768 | CONTIG81 | 18540  | 18905  | 1.09 | 6.04E-02 | transcription_start_site | - | 18343  | 18343  | -379  | 19989 | AN4777 |
| 1768 | CONTIG81 | 18540  | 18905  | 1.09 | 6.04E-02 | transcription_start_site | - | 18214  | 18214  | -508  | 19990 | AN4777 |
| 1095 | CONTIG81 | 21005  | 21359  | 1.61 | 3.99E-03 | transcription_start_site | - | 20673  | 20673  | -509  | 19991 | AN4778 |
| 1095 | CONTIG81 | 21005  | 21359  | 1.61 | 3.99E-03 | transcription_start_site | - | 20468  | 20468  | -714  | 19992 | AN4778 |
| 1095 | CONTIG81 | 21005  | 21359  | 1.61 | 3.99E-03 | transcription_start_site | - | 20319  | 20319  | -863  | 19993 | AN4778 |
| 1095 | CONTIG81 | 21005  | 21359  | 1.61 | 3.99E-03 | transcription_start_site | - | 20111  | 20111  | -1071 | 19994 | AN4778 |
| 1095 | CONTIG81 | 21005  | 21359  | 1.61 | 3.99E-03 | transcription_start_site | - | 20009  | 20009  | -1173 | 19995 | AN4778 |
| 1095 | CONTIG81 | 21005  | 21359  | 1.61 | 3.99E-03 | transcription_start_site | - | 19860  | 19860  | -1322 | 19996 | AN4778 |
| 1095 | CONTIG81 | 21005  | 21359  | 1.61 | 3.99E-03 | transcription_start_site | - | 19146  | 19146  | -2036 | 19997 | AN4778 |
| 1768 | CONTIG81 | 18540  | 18905  | 1.09 | 6.04E-02 | transcription_start_site | - | 19146  | 19146  | 423   | 19997 | AN4778 |
| 1768 | CONTIG81 | 18540  | 18905  | 1.09 | 6.04E-02 | transcription_start_site | - | 19860  | 19860  | 1137  | 19996 | AN4778 |
| 1971 | CONTIG81 | 23795  | 24054  | 0.96 | 9.60E-02 | transcription_start_site | - | 20673  | 20673  | -3251 | 19991 | AN4778 |
| 1971 | CONTIG81 | 23795  | 24054  | 0.96 | 9.60E-02 | transcription_start_site | - | 20468  | 20468  | -3456 | 19992 | AN4778 |
| 1971 | CONTIG81 | 23795  | 24054  | 0.96 | 9.60E-02 | transcription_start_site | - | 20319  | 20319  | -3605 | 19993 | AN4778 |
| 1971 | CONTIG81 | 23795  | 24054  | 0.96 | 9.60E-02 | transcription_start_site | - | 20111  | 20111  | -3813 | 19994 | AN4778 |
| 1971 | CONTIG81 | 23795  | 24054  | 0.96 | 9.60E-02 | transcription_start_site | - | 20009  | 20009  | -3915 | 19995 | AN4778 |
| 1971 | CONTIG81 | 23795  | 24054  | 0.96 | 9.60E-02 | transcription_start_site | - | 19860  | 19860  | -4064 | 19996 | AN4778 |
| 1971 | CONTIG81 | 23795  | 24054  | 0.96 | 9.60E-02 | transcription_start_site | - | 19146  | 19146  | -4778 | 19997 | AN4778 |
| 1095 | CONTIG81 | 21005  | 21359  | 1.61 | 3.99E-03 | transcription_start_site | - | 22259  | 22259  | 1077  | 19999 | AN4779 |
| 1971 | CONTIG81 | 23795  | 24054  | 0.96 | 9.60E-02 | transcription_start_site | - | 23012  | 23012  | -912  | 19998 | AN4779 |
| 1971 | CONTIG81 | 23795  | 24054  | 0.96 | 9.60E-02 | transcription_start_site | - | 22259  | 22259  | -1665 | 19999 | AN4779 |

|      |          |       |       |      |          |                          |   |       |       |       |       |        |
|------|----------|-------|-------|------|----------|--------------------------|---|-------|-------|-------|-------|--------|
| 1095 | CONTIG81 | 21005 | 21359 | 1.61 | 3.99E-03 | transcription_start_site | + | 24172 | 24172 | -2990 | 20000 | AN4780 |
| 1095 | CONTIG81 | 21005 | 21359 | 1.61 | 3.99E-03 | transcription_start_site | + | 24402 | 24402 | -3220 | 20001 | AN4780 |
| 1971 | CONTIG81 | 23795 | 24054 | 0.96 | 9.60E-02 | transcription_start_site | + | 24172 | 24172 | -247  | 20000 | AN4780 |
| 1971 | CONTIG81 | 23795 | 24054 | 0.96 | 9.60E-02 | transcription_start_site | + | 24402 | 24402 | -477  | 20001 | AN4780 |
| 1095 | CONTIG81 | 21005 | 21359 | 1.61 | 3.99E-03 | transcription_start_site | + | 25521 | 25521 | -4339 | 20002 | AN4781 |
| 1971 | CONTIG81 | 23795 | 24054 | 0.96 | 9.60E-02 | transcription_start_site | + | 25521 | 25521 | -1596 | 20002 | AN4781 |
| 1971 | CONTIG81 | 23795 | 24054 | 0.96 | 9.60E-02 | transcription_start_site | + | 26434 | 26434 | -2509 | 20003 | AN4781 |
| 2115 | CONTIG81 | 32637 | 32901 | 0.87 | 1.38E-01 | transcription_start_site | - | 27646 | 27646 | -5123 | 20004 | AN4782 |
| 1971 | CONTIG81 | 23795 | 24054 | 0.96 | 9.60E-02 | transcription_start_site | + | 28950 | 28950 | -5025 | 20009 | AN4783 |
| 2115 | CONTIG81 | 32637 | 32901 | 0.87 | 1.38E-01 | transcription_start_site | + | 34757 | 34757 | -1988 | 20013 | AN4784 |
| 2115 | CONTIG81 | 32637 | 32901 | 0.87 | 1.38E-01 | transcription_start_site | + | 35081 | 35081 | -2312 | 20014 | AN4784 |
| 2115 | CONTIG81 | 32637 | 32901 | 0.87 | 1.38E-01 | transcription_start_site | + | 35201 | 35201 | -2432 | 20015 | AN4784 |
| 2115 | CONTIG81 | 32637 | 32901 | 0.87 | 1.38E-01 | transcription_start_site | + | 35312 | 35312 | -2543 | 20016 | AN4784 |
| 2115 | CONTIG81 | 32637 | 32901 | 0.87 | 1.38E-01 | transcription_start_site | + | 35693 | 35693 | -2924 | 20017 | AN4784 |
| 2115 | CONTIG81 | 32637 | 32901 | 0.87 | 1.38E-01 | transcription_start_site | + | 36029 | 36029 | -3260 | 20018 | AN4784 |
| 2115 | CONTIG81 | 32637 | 32901 | 0.87 | 1.38E-01 | transcription_start_site | + | 36597 | 36597 | -3828 | 20019 | AN4784 |
| 2296 | CONTIG81 | 45237 | 46123 | 0.67 | 1.07E-01 | transcription_start_site | + | 44264 | 44264 | 1416  | 20028 | AN4786 |
| 2296 | CONTIG81 | 45237 | 46123 | 0.67 | 1.07E-01 | transcription_start_site | - | 45545 | 45545 | -135  | 20030 | AN4787 |
| 2296 | CONTIG81 | 45237 | 46123 | 0.67 | 1.07E-01 | transcription_start_site | - | 45866 | 45866 | 186   | 20029 | AN4787 |
| 2296 | CONTIG81 | 45237 | 46123 | 0.67 | 1.07E-01 | transcription_start_site | - | 45351 | 45351 | -329  | 20031 | AN4787 |
| 2296 | CONTIG81 | 45237 | 46123 | 0.67 | 1.07E-01 | transcription_start_site | - | 45178 | 45178 | -502  | 20032 | AN4787 |
| 2296 | CONTIG81 | 45237 | 46123 | 0.67 | 1.07E-01 | transcription_start_site | + | 47933 | 47933 | -2253 | 20034 | AN4789 |
| 2296 | CONTIG81 | 45237 | 46123 | 0.67 | 1.07E-01 | transcription_start_site | + | 48222 | 48222 | -2542 | 20035 | AN4789 |
| 1815 | CONTIG81 | 62419 | 62903 | 1.06 | 6.74E-02 | transcription_start_site | - | 57750 | 57750 | -4911 | 20036 | AN4790 |
| 1815 | CONTIG81 | 62419 | 62903 | 1.06 | 6.74E-02 | transcription_start_site | - | 57440 | 57440 | -5221 | 20037 | AN4790 |
| 1815 | CONTIG81 | 62419 | 62903 | 1.06 | 6.74E-02 | transcription_start_site | - | 61992 | 61992 | -669  | 20047 | AN4791 |
| 1815 | CONTIG81 | 62419 | 62903 | 1.06 | 6.74E-02 | transcription_start_site | - | 61853 | 61853 | -808  | 20048 | AN4791 |
| 1815 | CONTIG81 | 62419 | 62903 | 1.06 | 6.74E-02 | transcription_start_site | - | 61647 | 61647 | -1014 | 20049 | AN4791 |
| 1815 | CONTIG81 | 62419 | 62903 | 1.06 | 6.74E-02 | transcription_start_site | - | 61486 | 61486 | -1175 | 20050 | AN4791 |
| 1815 | CONTIG81 | 62419 | 62903 | 1.06 | 6.74E-02 | transcription_start_site | - | 60717 | 60717 | -1944 | 20051 | AN4791 |
| 1815 | CONTIG81 | 62419 | 62903 | 1.06 | 6.74E-02 | transcription_start_site | - | 60622 | 60622 | -2039 | 20052 | AN4791 |
| 1815 | CONTIG81 | 62419 | 62903 | 1.06 | 6.74E-02 | transcription_start_site | - | 59374 | 59374 | -3287 | 20053 | AN4791 |
| 1815 | CONTIG81 | 62419 | 62903 | 1.06 | 6.74E-02 | transcription_start_site | - | 59199 | 59199 | -3462 | 20054 | AN4791 |
| 1815 | CONTIG81 | 62419 | 62903 | 1.06 | 6.74E-02 | transcription_start_site | - | 59035 | 59035 | -3626 | 20055 | AN4791 |
| 1815 | CONTIG81 | 62419 | 62903 | 1.06 | 6.74E-02 | transcription_start_site | + | 62940 | 62940 | -279  | 20056 | AN4792 |
| 1815 | CONTIG81 | 62419 | 62903 | 1.06 | 6.74E-02 | transcription_start_site | + | 63330 | 63330 | -669  | 20057 | AN4792 |
| 1815 | CONTIG81 | 62419 | 62903 | 1.06 | 6.74E-02 | transcription_start_site | + | 63907 | 63907 | -1246 | 20058 | AN4792 |
| 1815 | CONTIG81 | 62419 | 62903 | 1.06 | 6.74E-02 | transcription_start_site | + | 64421 | 64421 | -1760 | 20059 | AN4792 |
| 1815 | CONTIG81 | 62419 | 62903 | 1.06 | 6.74E-02 | transcription_start_site | + | 65323 | 65323 | -2662 | 20060 | AN4793 |
| 1815 | CONTIG81 | 62419 | 62903 | 1.06 | 6.74E-02 | transcription_start_site | + | 65404 | 65404 | -2743 | 20061 | AN4793 |
| 1815 | CONTIG81 | 62419 | 62903 | 1.06 | 6.74E-02 | transcription_start_site | + | 65724 | 65724 | -3063 | 20062 | AN4793 |
| 2252 | CONTIG81 | 68489 | 69133 | 0.74 | 1.57E-01 | transcription_start_site | + | 68850 | 68850 | -39   | 20064 | AN4794 |
| 2252 | CONTIG81 | 68489 | 69133 | 0.74 | 1.57E-01 | transcription_start_site | + | 68706 | 68706 | 105   | 20063 | AN4794 |
| 2252 | CONTIG81 | 68489 | 69133 | 0.74 | 1.57E-01 | transcription_start_site | + | 69062 | 69062 | -251  | 20065 | AN4794 |
| 2252 | CONTIG81 | 68489 | 69133 | 0.74 | 1.57E-01 | transcription_start_site | + | 69515 | 69515 | -704  | 20066 | AN4794 |
| 2252 | CONTIG81 | 68489 | 69133 | 0.74 | 1.57E-01 | transcription_start_site | + | 69872 | 69872 | -1061 | 20067 | AN4794 |
| 313  | CONTIG81 | 72754 | 73108 | 2.6  | 0.00E+00 | transcription_start_site | + | 75419 | 75419 | -2488 | 20068 | AN4795 |
| 313  | CONTIG81 | 72754 | 73108 | 2.6  | 0.00E+00 | transcription_start_site | + | 76131 | 76131 | -3200 | 20069 | AN4795 |
| 313  | CONTIG81 | 72754 | 73108 | 2.6  | 0.00E+00 | transcription_start_site | + | 76655 | 76655 | -3724 | 20070 | AN4795 |
| 927  | CONTIG81 | 94733 | 95012 | 1.8  | 4.01E-03 | transcription_start_site | - | 90633 | 90633 | -4239 | 20079 | AN4800 |
| 927  | CONTIG81 | 94733 | 95012 | 1.8  | 4.01E-03 | transcription_start_site | - | 90358 | 90358 | -4514 | 20080 | AN4800 |
| 927  | CONTIG81 | 94733 | 95012 | 1.8  | 4.01E-03 | transcription_start_site | - | 90196 | 90196 | -4676 | 20081 | AN4800 |
| 927  | CONTIG81 | 94733 | 95012 | 1.8  | 4.01E-03 | transcription_start_site | - | 89783 | 89783 | -5089 | 20082 | AN4800 |
| 2196 | CONTIG81 | 95183 | 95752 | 0.8  | 1.76E-01 | transcription_start_site | - | 90633 | 90633 | -4834 | 20079 | AN4800 |
| 2196 | CONTIG81 | 95183 | 95752 | 0.8  | 1.76E-01 | transcription_start_site | - | 90358 | 90358 | -5109 | 20080 | AN4800 |
| 2196 | CONTIG81 | 95183 | 95752 | 0.8  | 1.76E-01 | transcription_start_site | - | 90196 | 90196 | -5271 | 20081 | AN4800 |
| 927  | CONTIG81 | 94733 | 95012 | 1.8  | 4.01E-03 | transcription_start_site | - | 93223 | 93223 | -1649 | 20085 | AN4801 |

|      |          |        |        |      |          |                          |   |        |        |       |       |        |
|------|----------|--------|--------|------|----------|--------------------------|---|--------|--------|-------|-------|--------|
| 927  | CONTIG81 | 94733  | 95012  | 1.8  | 4.01E-03 | transcription_start_site | - | 92620  | 92620  | -2252 | 20086 | AN4801 |
| 927  | CONTIG81 | 94733  | 95012  | 1.8  | 4.01E-03 | transcription_start_site | - | 91323  | 91323  | -3549 | 20087 | AN4801 |
| 1866 | CONTIG81 | 97218  | 97572  | 1.03 | 7.66E-02 | transcription_start_site | - | 93223  | 93223  | -4172 | 20085 | AN4801 |
| 1866 | CONTIG81 | 97218  | 97572  | 1.03 | 7.66E-02 | transcription_start_site | - | 92620  | 92620  | -4775 | 20086 | AN4801 |
| 2196 | CONTIG81 | 95183  | 95752  | 0.8  | 1.76E-01 | transcription_start_site | - | 93223  | 93223  | -2244 | 20085 | AN4801 |
| 2196 | CONTIG81 | 95183  | 95752  | 0.8  | 1.76E-01 | transcription_start_site | - | 92620  | 92620  | -2847 | 20086 | AN4801 |
| 2196 | CONTIG81 | 95183  | 95752  | 0.8  | 1.76E-01 | transcription_start_site | - | 91323  | 91323  | -4144 | 20087 | AN4801 |
| 1866 | CONTIG81 | 97218  | 97572  | 1.03 | 7.66E-02 | transcription_start_site | - | 97319  | 97319  | -76   | 20088 | AN4802 |
| 1866 | CONTIG81 | 97218  | 97572  | 1.03 | 7.66E-02 | transcription_start_site | - | 97223  | 97223  | -172  | 20089 | AN4802 |
| 1866 | CONTIG81 | 97218  | 97572  | 1.03 | 7.66E-02 | transcription_start_site | - | 97088  | 97088  | -307  | 20090 | AN4802 |
| 1866 | CONTIG81 | 97218  | 97572  | 1.03 | 7.66E-02 | transcription_start_site | - | 96922  | 96922  | -473  | 20091 | AN4802 |
| 927  | CONTIG81 | 94733  | 95012  | 1.8  | 4.01E-03 | transcription_start_site | + | 97601  | 97601  | -2728 | 20092 | AN4803 |
| 927  | CONTIG81 | 94733  | 95012  | 1.8  | 4.01E-03 | transcription_start_site | + | 97685  | 97685  | -2812 | 20093 | AN4803 |
| 927  | CONTIG81 | 94733  | 95012  | 1.8  | 4.01E-03 | transcription_start_site | + | 97791  | 97791  | -2918 | 20094 | AN4803 |
| 927  | CONTIG81 | 94733  | 95012  | 1.8  | 4.01E-03 | transcription_start_site | + | 97890  | 97890  | -3017 | 20095 | AN4803 |
| 927  | CONTIG81 | 94733  | 95012  | 1.8  | 4.01E-03 | transcription_start_site | + | 98050  | 98050  | -3177 | 20096 | AN4803 |
| 1866 | CONTIG81 | 97218  | 97572  | 1.03 | 7.66E-02 | transcription_start_site | + | 97601  | 97601  | -206  | 20092 | AN4803 |
| 1866 | CONTIG81 | 97218  | 97572  | 1.03 | 7.66E-02 | transcription_start_site | + | 97685  | 97685  | -290  | 20093 | AN4803 |
| 1866 | CONTIG81 | 97218  | 97572  | 1.03 | 7.66E-02 | transcription_start_site | + | 97791  | 97791  | -396  | 20094 | AN4803 |
| 1866 | CONTIG81 | 97218  | 97572  | 1.03 | 7.66E-02 | transcription_start_site | + | 97890  | 97890  | -495  | 20095 | AN4803 |
| 1866 | CONTIG81 | 97218  | 97572  | 1.03 | 7.66E-02 | transcription_start_site | + | 98050  | 98050  | -655  | 20096 | AN4803 |
| 2196 | CONTIG81 | 95183  | 95752  | 0.8  | 1.76E-01 | transcription_start_site | + | 97601  | 97601  | -2133 | 20092 | AN4803 |
| 2196 | CONTIG81 | 95183  | 95752  | 0.8  | 1.76E-01 | transcription_start_site | + | 97685  | 97685  | -2217 | 20093 | AN4803 |
| 2196 | CONTIG81 | 95183  | 95752  | 0.8  | 1.76E-01 | transcription_start_site | + | 97791  | 97791  | -2323 | 20094 | AN4803 |
| 2196 | CONTIG81 | 95183  | 95752  | 0.8  | 1.76E-01 | transcription_start_site | + | 97890  | 97890  | -2422 | 20095 | AN4803 |
| 2196 | CONTIG81 | 95183  | 95752  | 0.8  | 1.76E-01 | transcription_start_site | + | 98050  | 98050  | -2582 | 20096 | AN4803 |
| 1866 | CONTIG81 | 97218  | 97572  | 1.03 | 7.66E-02 | transcription_start_site | + | 100068 | 100068 | -2673 | 20100 | AN4805 |
| 1866 | CONTIG81 | 97218  | 97572  | 1.03 | 7.66E-02 | transcription_start_site | + | 100257 | 100257 | -2862 | 20101 | AN4805 |
| 2196 | CONTIG81 | 95183  | 95752  | 0.8  | 1.76E-01 | transcription_start_site | + | 100068 | 100068 | -4600 | 20100 | AN4805 |
| 2196 | CONTIG81 | 95183  | 95752  | 0.8  | 1.76E-01 | transcription_start_site | + | 100257 | 100257 | -4789 | 20101 | AN4805 |
| 1866 | CONTIG81 | 97218  | 97572  | 1.03 | 7.66E-02 | transcription_start_site | + | 101696 | 101696 | -4301 | 20102 | AN4806 |
| 1866 | CONTIG81 | 97218  | 97572  | 1.03 | 7.66E-02 | transcription_start_site | + | 101874 | 101874 | -4479 | 20103 | AN4806 |
| 1866 | CONTIG81 | 97218  | 97572  | 1.03 | 7.66E-02 | transcription_start_site | + | 102072 | 102072 | -4677 | 20104 | AN4806 |
| 1866 | CONTIG81 | 97218  | 97572  | 1.03 | 7.66E-02 | transcription_start_site | + | 102200 | 102200 | -4805 | 20105 | AN4806 |
| 1213 | CONTIG81 | 104778 | 105577 | 1.51 | 4.92E-03 | transcription_start_site | + | 104664 | 104664 | 513   | 20110 | AN4807 |
| 1213 | CONTIG81 | 104778 | 105577 | 1.51 | 4.92E-03 | transcription_start_site | + | 104072 | 104072 | 1105  | 20109 | AN4807 |
| 1213 | CONTIG81 | 104778 | 105577 | 1.51 | 4.92E-03 | transcription_start_site | + | 103858 | 103858 | 1319  | 20108 | AN4807 |
| 1217 | CONTIG81 | 109668 | 109942 | 1.51 | 1.25E-02 | transcription_start_site | + | 114650 | 114650 | -4845 | 20111 | AN4809 |
| 1217 | CONTIG81 | 109668 | 109942 | 1.51 | 1.25E-02 | transcription_start_site | + | 114904 | 114904 | -5099 | 20112 | AN4809 |
| 1723 | CONTIG81 | 123153 | 123507 | 1.12 | 5.36E-02 | transcription_start_site | - | 119339 | 119339 | -3991 | 20119 | AN4810 |
| 1723 | CONTIG81 | 123153 | 123507 | 1.12 | 5.36E-02 | transcription_start_site | - | 118902 | 118902 | -4428 | 20120 | AN4810 |
| 1723 | CONTIG81 | 123153 | 123507 | 1.12 | 5.36E-02 | transcription_start_site | + | 122890 | 122890 | 440   | 20131 | AN4812 |
| 1723 | CONTIG81 | 123153 | 123507 | 1.12 | 5.36E-02 | transcription_start_site | - | 124030 | 124030 | 700   | 20135 | AN4813 |
| 1908 | CONTIG81 | 129018 | 129500 | 1    | 8.63E-02 | transcription_start_site | - | 126750 | 126750 | -2509 | 20132 | AN4813 |
| 1908 | CONTIG81 | 129018 | 129500 | 1    | 8.63E-02 | transcription_start_site | - | 126404 | 126404 | -2855 | 20133 | AN4813 |
| 1908 | CONTIG81 | 129018 | 129500 | 1    | 8.63E-02 | transcription_start_site | - | 125134 | 125134 | -4125 | 20134 | AN4813 |
| 1908 | CONTIG81 | 129018 | 129500 | 1    | 8.63E-02 | transcription_start_site | - | 124030 | 124030 | -5229 | 20135 | AN4813 |
| 1908 | CONTIG81 | 129018 | 129500 | 1    | 8.63E-02 | transcription_start_site | - | 129111 | 129111 | -148  | 20136 | AN4814 |
| 1908 | CONTIG81 | 129018 | 129500 | 1    | 8.63E-02 | transcription_start_site | - | 128460 | 128460 | -799  | 20137 | AN4814 |
| 1908 | CONTIG81 | 129018 | 129500 | 1    | 8.63E-02 | transcription_start_site | - | 127512 | 127512 | -1747 | 20138 | AN4814 |
| 1908 | CONTIG81 | 129018 | 129500 | 1    | 8.63E-02 | transcription_start_site | + | 133327 | 133327 | -4068 | 20139 | AN4815 |
| 1908 | CONTIG81 | 129018 | 129500 | 1    | 8.63E-02 | transcription_start_site | + | 133736 | 133736 | -4477 | 20140 | AN4815 |
| 1908 | CONTIG81 | 129018 | 129500 | 1    | 8.63E-02 | transcription_start_site | + | 133866 | 133866 | -4607 | 20141 | AN4815 |
| 599  | CONTIG81 | 140936 | 141216 | 2.18 | 2.26E-04 | transcription_start_site | - | 136619 | 136619 | -4457 | 20142 | AN4816 |
| 599  | CONTIG81 | 140936 | 141216 | 2.18 | 2.26E-04 | transcription_start_site | - | 136386 | 136386 | -4690 | 20143 | AN4816 |
| 1724 | CONTIG81 | 136221 | 136480 | 1.12 | 5.36E-02 | transcription_start_site | - | 136386 | 136386 | 35    | 20143 | AN4816 |
| 1724 | CONTIG81 | 136221 | 136480 | 1.12 | 5.36E-02 | transcription_start_site | - | 136619 | 136619 | 268   | 20142 | AN4816 |

|      |          |        |        |      |          |                          |   |        |        |       |       |        |
|------|----------|--------|--------|------|----------|--------------------------|---|--------|--------|-------|-------|--------|
| 1816 | CONTIG81 | 137416 | 137920 | 1.06 | 6.74E-02 | transcription_start_site | - | 136619 | 136619 | -1049 | 20142 | AN4816 |
| 1816 | CONTIG81 | 137416 | 137920 | 1.06 | 6.74E-02 | transcription_start_site | - | 136386 | 136386 | -1282 | 20143 | AN4816 |
| 2197 | CONTIG81 | 136726 | 137257 | 0.8  | 1.76E-01 | transcription_start_site | - | 136619 | 136619 | -372  | 20142 | AN4816 |
| 2197 | CONTIG81 | 136726 | 137257 | 0.8  | 1.76E-01 | transcription_start_site | - | 136386 | 136386 | -605  | 20143 | AN4816 |
| 599  | CONTIG81 | 140936 | 141216 | 2.18 | 2.26E-04 | transcription_start_site | + | 140399 | 140399 | 677   | 20146 | AN4817 |
| 1724 | CONTIG81 | 136221 | 136480 | 1.12 | 5.36E-02 | transcription_start_site | + | 138282 | 138282 | -1931 | 20144 | AN4817 |
| 1724 | CONTIG81 | 136221 | 136480 | 1.12 | 5.36E-02 | transcription_start_site | + | 138522 | 138522 | -2171 | 20145 | AN4817 |
| 1724 | CONTIG81 | 136221 | 136480 | 1.12 | 5.36E-02 | transcription_start_site | + | 140399 | 140399 | -4048 | 20146 | AN4817 |
| 1816 | CONTIG81 | 137416 | 137920 | 1.06 | 6.74E-02 | transcription_start_site | + | 138282 | 138282 | -614  | 20144 | AN4817 |
| 1816 | CONTIG81 | 137416 | 137920 | 1.06 | 6.74E-02 | transcription_start_site | + | 138522 | 138522 | -854  | 20145 | AN4817 |
| 1816 | CONTIG81 | 137416 | 137920 | 1.06 | 6.74E-02 | transcription_start_site | + | 140399 | 140399 | -2731 | 20146 | AN4817 |
| 2197 | CONTIG81 | 136726 | 137257 | 0.8  | 1.76E-01 | transcription_start_site | + | 138282 | 138282 | -1290 | 20144 | AN4817 |
| 2197 | CONTIG81 | 136726 | 137257 | 0.8  | 1.76E-01 | transcription_start_site | + | 138522 | 138522 | -1530 | 20145 | AN4817 |
| 2197 | CONTIG81 | 136726 | 137257 | 0.8  | 1.76E-01 | transcription_start_site | + | 140399 | 140399 | -3407 | 20146 | AN4817 |
| 599  | CONTIG81 | 140936 | 141216 | 2.18 | 2.26E-04 | transcription_start_site | + | 141550 | 141550 | -474  | 20147 | AN4818 |
| 599  | CONTIG81 | 140936 | 141216 | 2.18 | 2.26E-04 | transcription_start_site | + | 141932 | 141932 | -856  | 20148 | AN4818 |
| 599  | CONTIG81 | 140936 | 141216 | 2.18 | 2.26E-04 | transcription_start_site | + | 142148 | 142148 | -1072 | 20149 | AN4818 |
| 599  | CONTIG81 | 140936 | 141216 | 2.18 | 2.26E-04 | transcription_start_site | + | 143508 | 143508 | -2432 | 20150 | AN4818 |
| 599  | CONTIG81 | 140936 | 141216 | 2.18 | 2.26E-04 | transcription_start_site | + | 145287 | 145287 | -4211 | 20151 | AN4818 |
| 1816 | CONTIG81 | 137416 | 137920 | 1.06 | 6.74E-02 | transcription_start_site | + | 141550 | 141550 | -3882 | 20147 | AN4818 |
| 1816 | CONTIG81 | 137416 | 137920 | 1.06 | 6.74E-02 | transcription_start_site | + | 141932 | 141932 | -4264 | 20148 | AN4818 |
| 1816 | CONTIG81 | 137416 | 137920 | 1.06 | 6.74E-02 | transcription_start_site | + | 142148 | 142148 | -4480 | 20149 | AN4818 |
| 2197 | CONTIG81 | 136726 | 137257 | 0.8  | 1.76E-01 | transcription_start_site | + | 141550 | 141550 | -4558 | 20147 | AN4818 |
| 2197 | CONTIG81 | 136726 | 137257 | 0.8  | 1.76E-01 | transcription_start_site | + | 141932 | 141932 | -4940 | 20148 | AN4818 |
| 2197 | CONTIG81 | 136726 | 137257 | 0.8  | 1.76E-01 | transcription_start_site | + | 142148 | 142148 | -5156 | 20149 | AN4818 |
| 1332 | CONTIG81 | 150528 | 150807 | 1.41 | 1.80E-02 | transcription_start_site | - | 150623 | 150623 | -44   | 20157 | AN4820 |
| 1332 | CONTIG81 | 150528 | 150807 | 1.41 | 1.80E-02 | transcription_start_site | - | 150764 | 150764 | 96    | 20156 | AN4820 |
| 1332 | CONTIG81 | 150528 | 150807 | 1.41 | 1.80E-02 | transcription_start_site | - | 150844 | 150844 | 176   | 20155 | AN4820 |
| 2116 | CONTIG81 | 150993 | 151638 | 0.87 | 1.38E-01 | transcription_start_site | - | 150844 | 150844 | -471  | 20155 | AN4820 |
| 2116 | CONTIG81 | 150993 | 151638 | 0.87 | 1.38E-01 | transcription_start_site | - | 150764 | 150764 | -551  | 20156 | AN4820 |
| 2116 | CONTIG81 | 150993 | 151638 | 0.87 | 1.38E-01 | transcription_start_site | - | 150623 | 150623 | -692  | 20157 | AN4820 |
| 1332 | CONTIG81 | 150528 | 150807 | 1.41 | 1.80E-02 | transcription_start_site | + | 152026 | 152026 | -1358 | 20158 | AN4821 |
| 1332 | CONTIG81 | 150528 | 150807 | 1.41 | 1.80E-02 | transcription_start_site | + | 152979 | 152979 | -2311 | 20159 | AN4821 |
| 1332 | CONTIG81 | 150528 | 150807 | 1.41 | 1.80E-02 | transcription_start_site | + | 153579 | 153579 | -2911 | 20160 | AN4821 |
| 2116 | CONTIG81 | 150993 | 151638 | 0.87 | 1.38E-01 | transcription_start_site | + | 152026 | 152026 | -710  | 20158 | AN4821 |
| 2116 | CONTIG81 | 150993 | 151638 | 0.87 | 1.38E-01 | transcription_start_site | + | 152979 | 152979 | -1663 | 20159 | AN4821 |
| 2116 | CONTIG81 | 150993 | 151638 | 0.87 | 1.38E-01 | transcription_start_site | + | 153579 | 153579 | -2263 | 20160 | AN4821 |
| 1332 | CONTIG81 | 150528 | 150807 | 1.41 | 1.80E-02 | transcription_start_site | + | 154337 | 154337 | -3669 | 20161 | AN4822 |
| 1332 | CONTIG81 | 150528 | 150807 | 1.41 | 1.80E-02 | transcription_start_site | + | 154651 | 154651 | -3983 | 20162 | AN4822 |
| 1332 | CONTIG81 | 150528 | 150807 | 1.41 | 1.80E-02 | transcription_start_site | + | 155203 | 155203 | -4535 | 20163 | AN4822 |
| 2116 | CONTIG81 | 150993 | 151638 | 0.87 | 1.38E-01 | transcription_start_site | + | 154337 | 154337 | -3021 | 20161 | AN4822 |
| 2116 | CONTIG81 | 150993 | 151638 | 0.87 | 1.38E-01 | transcription_start_site | + | 154651 | 154651 | -3335 | 20162 | AN4822 |
| 2116 | CONTIG81 | 150993 | 151638 | 0.87 | 1.38E-01 | transcription_start_site | + | 155203 | 155203 | -3887 | 20163 | AN4822 |
| 2317 | CONTIG82 | 25354  | 26228  | 0.64 | 8.63E-02 | transcription_start_site | - | 25314  | 25314  | -477  | 20194 | AN4830 |
| 2317 | CONTIG82 | 25354  | 26228  | 0.64 | 8.63E-02 | transcription_start_site | - | 25012  | 25012  | -779  | 20195 | AN4830 |
| 2156 | CONTIG82 | 30983  | 31349  | 0.82 | 3.01E-02 | transcription_start_site | - | 27101  | 27101  | -4065 | 20196 | AN4831 |
| 2156 | CONTIG82 | 30983  | 31349  | 0.82 | 3.01E-02 | transcription_start_site | - | 26923  | 26923  | -4243 | 20197 | AN4831 |
| 2156 | CONTIG82 | 30983  | 31349  | 0.82 | 3.01E-02 | transcription_start_site | - | 26777  | 26777  | -4389 | 20198 | AN4831 |
| 2156 | CONTIG82 | 30983  | 31349  | 0.82 | 3.01E-02 | transcription_start_site | - | 26640  | 26640  | -4526 | 20199 | AN4831 |
| 2156 | CONTIG82 | 30983  | 31349  | 0.82 | 3.01E-02 | transcription_start_site | - | 26023  | 26023  | -5143 | 20200 | AN4831 |
| 2317 | CONTIG82 | 25354  | 26228  | 0.64 | 8.63E-02 | transcription_start_site | - | 26023  | 26023  | 232   | 20200 | AN4831 |
| 2317 | CONTIG82 | 25354  | 26228  | 0.64 | 8.63E-02 | transcription_start_site | - | 26640  | 26640  | 849   | 20199 | AN4831 |
| 2317 | CONTIG82 | 25354  | 26228  | 0.64 | 8.63E-02 | transcription_start_site | - | 26777  | 26777  | 986   | 20198 | AN4831 |
| 2317 | CONTIG82 | 25354  | 26228  | 0.64 | 8.63E-02 | transcription_start_site | - | 26923  | 26923  | 1132  | 20197 | AN4831 |
| 2317 | CONTIG82 | 25354  | 26228  | 0.64 | 8.63E-02 | transcription_start_site | - | 27101  | 27101  | 1310  | 20196 | AN4831 |
| 2156 | CONTIG82 | 30983  | 31349  | 0.82 | 3.01E-02 | transcription_start_site | - | 29216  | 29216  | -1950 | 20201 | AN4832 |
| 2156 | CONTIG82 | 30983  | 31349  | 0.82 | 3.01E-02 | transcription_start_site | - | 29077  | 29077  | -2089 | 20202 | AN4832 |

|      |          |       |       |      |          |                          |   |       |       |       |       |        |
|------|----------|-------|-------|------|----------|--------------------------|---|-------|-------|-------|-------|--------|
| 2156 | CONTIG82 | 30983 | 31349 | 0.82 | 3.01E-02 | transcription_start_site | - | 28946 | 28946 | -2220 | 20203 | AN4832 |
| 2156 | CONTIG82 | 30983 | 31349 | 0.82 | 3.01E-02 | transcription_start_site | - | 28889 | 28889 | -2277 | 20204 | AN4832 |
| 2156 | CONTIG82 | 30983 | 31349 | 0.82 | 3.01E-02 | transcription_start_site | - | 28641 | 28641 | -2525 | 20205 | AN4832 |
| 2156 | CONTIG82 | 30983 | 31349 | 0.82 | 3.01E-02 | transcription_start_site | - | 28535 | 28535 | -2631 | 20206 | AN4832 |
| 2317 | CONTIG82 | 25354 | 26228 | 0.64 | 8.63E-02 | transcription_start_site | + | 29848 | 29848 | -4057 | 20207 | AN4833 |
| 2156 | CONTIG82 | 30983 | 31349 | 0.82 | 3.01E-02 | transcription_start_site | + | 31968 | 31968 | -802  | 20208 | AN4834 |
| 2156 | CONTIG82 | 30983 | 31349 | 0.82 | 3.01E-02 | transcription_start_site | + | 32922 | 32922 | -1756 | 20209 | AN4834 |
| 2156 | CONTIG82 | 30983 | 31349 | 0.82 | 3.01E-02 | transcription_start_site | + | 35834 | 35834 | -4668 | 20212 | AN4836 |
| 1915 | CONTIG82 | 42536 | 42970 | 0.99 | 1.06E-02 | transcription_start_site | - | 40376 | 40376 | -2377 | 20214 | AN4837 |
| 1915 | CONTIG82 | 42536 | 42970 | 0.99 | 1.06E-02 | transcription_start_site | - | 40229 | 40229 | -2524 | 20215 | AN4837 |
| 1915 | CONTIG82 | 42536 | 42970 | 0.99 | 1.06E-02 | transcription_start_site | - | 39910 | 39910 | -2843 | 20216 | AN4837 |
| 2362 | CONTIG82 | 43441 | 44013 | 0.49 | 1.34E-01 | transcription_start_site | - | 40376 | 40376 | -3351 | 20214 | AN4837 |
| 2362 | CONTIG82 | 43441 | 44013 | 0.49 | 1.34E-01 | transcription_start_site | - | 40229 | 40229 | -3498 | 20215 | AN4837 |
| 2362 | CONTIG82 | 43441 | 44013 | 0.49 | 1.34E-01 | transcription_start_site | - | 39910 | 39910 | -3817 | 20216 | AN4837 |
| 1915 | CONTIG82 | 42536 | 42970 | 0.99 | 1.06E-02 | transcription_start_site | + | 42816 | 42816 | -63   | 20217 | AN4838 |
| 1915 | CONTIG82 | 42536 | 42970 | 0.99 | 1.06E-02 | transcription_start_site | + | 43473 | 43473 | -720  | 20218 | AN4838 |
| 2362 | CONTIG82 | 43441 | 44013 | 0.49 | 1.34E-01 | transcription_start_site | + | 43473 | 43473 | 254   | 20218 | AN4838 |
| 2362 | CONTIG82 | 43441 | 44013 | 0.49 | 1.34E-01 | transcription_start_site | + | 42816 | 42816 | 911   | 20217 | AN4838 |
| 549  | CONTIG83 | 12766 | 13115 | 2.25 | 3.37E-03 | transcription_start_site | - | 10151 | 10151 | -2789 | 20226 | AN4842 |
| 549  | CONTIG83 | 12766 | 13115 | 2.25 | 3.37E-03 | transcription_start_site | - | 9679  | 9679  | -3261 | 20227 | AN4842 |
| 549  | CONTIG83 | 12766 | 13115 | 2.25 | 3.37E-03 | transcription_start_site | - | 9290  | 9290  | -3650 | 20228 | AN4842 |
| 1760 | CONTIG83 | 14191 | 14610 | 1.1  | 1.22E-01 | transcription_start_site | - | 10151 | 10151 | -4249 | 20226 | AN4842 |
| 1760 | CONTIG83 | 14191 | 14610 | 1.1  | 1.22E-01 | transcription_start_site | - | 9679  | 9679  | -4721 | 20227 | AN4842 |
| 1760 | CONTIG83 | 14191 | 14610 | 1.1  | 1.22E-01 | transcription_start_site | - | 9290  | 9290  | -5110 | 20228 | AN4842 |
| 463  | CONTIG83 | 16052 | 16413 | 2.37 | 1.77E-03 | transcription_start_site | - | 12300 | 12300 | -3932 | 20229 | AN4843 |
| 463  | CONTIG83 | 16052 | 16413 | 2.37 | 1.77E-03 | transcription_start_site | - | 11766 | 11766 | -4466 | 20230 | AN4843 |
| 549  | CONTIG83 | 12766 | 13115 | 2.25 | 3.37E-03 | transcription_start_site | - | 12300 | 12300 | -640  | 20229 | AN4843 |
| 549  | CONTIG83 | 12766 | 13115 | 2.25 | 3.37E-03 | transcription_start_site | - | 11766 | 11766 | -1174 | 20230 | AN4843 |
| 549  | CONTIG83 | 12766 | 13115 | 2.25 | 3.37E-03 | transcription_start_site | - | 10957 | 10957 | -1983 | 20231 | AN4843 |
| 1760 | CONTIG83 | 14191 | 14610 | 1.1  | 1.22E-01 | transcription_start_site | - | 12300 | 12300 | -2100 | 20229 | AN4843 |
| 1760 | CONTIG83 | 14191 | 14610 | 1.1  | 1.22E-01 | transcription_start_site | - | 11766 | 11766 | -2634 | 20230 | AN4843 |
| 1760 | CONTIG83 | 14191 | 14610 | 1.1  | 1.22E-01 | transcription_start_site | - | 10957 | 10957 | -3443 | 20231 | AN4843 |
| 463  | CONTIG83 | 16052 | 16413 | 2.37 | 1.77E-03 | transcription_start_site | + | 16807 | 16807 | -574  | 20232 | AN4845 |
| 463  | CONTIG83 | 16052 | 16413 | 2.37 | 1.77E-03 | transcription_start_site | + | 17114 | 17114 | -881  | 20233 | AN4845 |
| 463  | CONTIG83 | 16052 | 16413 | 2.37 | 1.77E-03 | transcription_start_site | + | 18163 | 18163 | -1930 | 20234 | AN4845 |
| 463  | CONTIG83 | 16052 | 16413 | 2.37 | 1.77E-03 | transcription_start_site | + | 18255 | 18255 | -2022 | 20235 | AN4845 |
| 549  | CONTIG83 | 12766 | 13115 | 2.25 | 3.37E-03 | transcription_start_site | + | 16807 | 16807 | -3866 | 20232 | AN4845 |
| 549  | CONTIG83 | 12766 | 13115 | 2.25 | 3.37E-03 | transcription_start_site | + | 17114 | 17114 | -4173 | 20233 | AN4845 |
| 1760 | CONTIG83 | 14191 | 14610 | 1.1  | 1.22E-01 | transcription_start_site | + | 16807 | 16807 | -2406 | 20232 | AN4845 |
| 1760 | CONTIG83 | 14191 | 14610 | 1.1  | 1.22E-01 | transcription_start_site | + | 17114 | 17114 | -2713 | 20233 | AN4845 |
| 1760 | CONTIG83 | 14191 | 14610 | 1.1  | 1.22E-01 | transcription_start_site | + | 18163 | 18163 | -3762 | 20234 | AN4845 |
| 1760 | CONTIG83 | 14191 | 14610 | 1.1  | 1.22E-01 | transcription_start_site | + | 18255 | 18255 | -3854 | 20235 | AN4845 |
| 463  | CONTIG83 | 16052 | 16413 | 2.37 | 1.77E-03 | transcription_start_site | + | 19893 | 19893 | -3660 | 20236 | AN4846 |
| 463  | CONTIG83 | 16052 | 16413 | 2.37 | 1.77E-03 | transcription_start_site | + | 20254 | 20254 | -4021 | 20237 | AN4846 |
| 464  | CONTIG83 | 52135 | 52414 | 2.37 | 1.77E-03 | transcription_start_site | - | 49403 | 49403 | -2871 | 20258 | AN4854 |
| 464  | CONTIG83 | 52135 | 52414 | 2.37 | 1.77E-03 | transcription_start_site | - | 49158 | 49158 | -3116 | 20259 | AN4854 |
| 464  | CONTIG83 | 52135 | 52414 | 2.37 | 1.77E-03 | transcription_start_site | - | 48723 | 48723 | -3551 | 20260 | AN4854 |
| 464  | CONTIG83 | 52135 | 52414 | 2.37 | 1.77E-03 | transcription_start_site | - | 48619 | 48619 | -3655 | 20261 | AN4854 |
| 464  | CONTIG83 | 52135 | 52414 | 2.37 | 1.77E-03 | transcription_start_site | + | 53765 | 53765 | -1490 | 20262 | AN4855 |
| 464  | CONTIG83 | 52135 | 52414 | 2.37 | 1.77E-03 | transcription_start_site | + | 54193 | 54193 | -1918 | 20263 | AN4855 |
| 336  | CONTIG84 | 21159 | 21428 | 2.56 | 3.37E-03 | transcription_start_site | + | 21823 | 21823 | -529  | 20266 | AN4859 |
| 336  | CONTIG84 | 21159 | 21428 | 2.56 | 3.37E-03 | transcription_start_site | + | 22286 | 22286 | -992  | 20267 | AN4859 |
| 336  | CONTIG84 | 21159 | 21428 | 2.56 | 3.37E-03 | transcription_start_site | + | 22576 | 22576 | -1282 | 20268 | AN4859 |
| 386  | CONTIG84 | 16959 | 17603 | 2.47 | 1.41E-03 | transcription_start_site | + | 21823 | 21823 | -4542 | 20266 | AN4859 |
| 386  | CONTIG84 | 16959 | 17603 | 2.47 | 1.41E-03 | transcription_start_site | + | 22286 | 22286 | -5005 | 20267 | AN4859 |
| 386  | CONTIG84 | 16959 | 17603 | 2.47 | 1.41E-03 | transcription_start_site | + | 22576 | 22576 | -5295 | 20268 | AN4859 |
| 369  | CONTIG84 | 47645 | 47919 | 2.51 | 4.01E-03 | transcription_start_site | + | 48488 | 48488 | -706  | 20290 | AN4870 |

|      |          |        |        |      |          |                          |   |        |        |       |       |        |
|------|----------|--------|--------|------|----------|--------------------------|---|--------|--------|-------|-------|--------|
| 369  | CONTIG84 | 47645  | 47919  | 2.51 | 4.01E-03 | transcription_start_site | + | 48560  | 48560  | -778  | 20291 | AN4870 |
| 369  | CONTIG84 | 47645  | 47919  | 2.51 | 4.01E-03 | transcription_start_site | + | 48854  | 48854  | -1072 | 20292 | AN4870 |
| 369  | CONTIG84 | 47645  | 47919  | 2.51 | 4.01E-03 | transcription_start_site | + | 49076  | 49076  | -1294 | 20293 | AN4870 |
| 369  | CONTIG84 | 47645  | 47919  | 2.51 | 4.01E-03 | transcription_start_site | + | 51428  | 51428  | -3646 | 20294 | AN4871 |
| 369  | CONTIG84 | 47645  | 47919  | 2.51 | 4.01E-03 | transcription_start_site | + | 51521  | 51521  | -3739 | 20295 | AN4871 |
| 369  | CONTIG84 | 47645  | 47919  | 2.51 | 4.01E-03 | transcription_start_site | + | 51681  | 51681  | -3899 | 20296 | AN4871 |
| 369  | CONTIG84 | 47645  | 47919  | 2.51 | 4.01E-03 | transcription_start_site | + | 51996  | 51996  | -4214 | 20297 | AN4871 |
| 369  | CONTIG84 | 47645  | 47919  | 2.51 | 4.01E-03 | transcription_start_site | + | 52073  | 52073  | -4291 | 20298 | AN4871 |
| 369  | CONTIG84 | 47645  | 47919  | 2.51 | 4.01E-03 | transcription_start_site | + | 52172  | 52172  | -4390 | 20299 | AN4871 |
| 369  | CONTIG84 | 47645  | 47919  | 2.51 | 4.01E-03 | transcription_start_site | + | 52276  | 52276  | -4494 | 20300 | AN4871 |
| 967  | CONTIG84 | 54160  | 54504  | 1.75 | 3.34E-02 | transcription_start_site | - | 53784  | 53784  | -548  | 20301 | AN4872 |
| 967  | CONTIG84 | 54160  | 54504  | 1.75 | 3.34E-02 | transcription_start_site | - | 53633  | 53633  | -699  | 20302 | AN4872 |
| 967  | CONTIG84 | 54160  | 54504  | 1.75 | 3.34E-02 | transcription_start_site | - | 53302  | 53302  | -1030 | 20303 | AN4872 |
| 967  | CONTIG84 | 54160  | 54504  | 1.75 | 3.34E-02 | transcription_start_site | + | 55154  | 55154  | -822  | 20304 | AN4873 |
| 967  | CONTIG84 | 54160  | 54504  | 1.75 | 3.34E-02 | transcription_start_site | + | 55861  | 55861  | -1529 | 20305 | AN4873 |
| 559  | CONTIG84 | 66232  | 66963  | 2.24 | 1.10E-03 | transcription_start_site | - | 61719  | 61719  | -4878 | 20312 | AN4875 |
| 559  | CONTIG84 | 66232  | 66963  | 2.24 | 1.10E-03 | transcription_start_site | - | 61311  | 61311  | -5286 | 20313 | AN4875 |
| 559  | CONTIG84 | 66232  | 66963  | 2.24 | 1.10E-03 | transcription_start_site | + | 65775  | 65775  | 822   | 20318 | AN4876 |
| 891  | CONTIG84 | 72092  | 72651  | 1.84 | 1.30E-02 | transcription_start_site | - | 71575  | 71575  | -796  | 20319 | AN4877 |
| 891  | CONTIG84 | 72092  | 72651  | 1.84 | 1.30E-02 | transcription_start_site | - | 70965  | 70965  | -1406 | 20320 | AN4877 |
| 165  | CONTIG84 | 67882  | 69361  | 2.91 | 0.00E+00 | transcription_start_site | + | 73365  | 73365  | -4743 | 20321 | AN4878 |
| 165  | CONTIG84 | 67882  | 69361  | 2.91 | 0.00E+00 | transcription_start_site | + | 73452  | 73452  | -4830 | 20322 | AN4878 |
| 165  | CONTIG84 | 67882  | 69361  | 2.91 | 0.00E+00 | transcription_start_site | + | 73707  | 73707  | -5085 | 20323 | AN4878 |
| 165  | CONTIG84 | 67882  | 69361  | 2.91 | 0.00E+00 | transcription_start_site | + | 74279  | 74279  | -5657 | 20324 | AN4878 |
| 891  | CONTIG84 | 72092  | 72651  | 1.84 | 1.30E-02 | transcription_start_site | + | 73365  | 73365  | -993  | 20321 | AN4878 |
| 891  | CONTIG84 | 72092  | 72651  | 1.84 | 1.30E-02 | transcription_start_site | + | 73452  | 73452  | -1080 | 20322 | AN4878 |
| 891  | CONTIG84 | 72092  | 72651  | 1.84 | 1.30E-02 | transcription_start_site | + | 73707  | 73707  | -1335 | 20323 | AN4878 |
| 891  | CONTIG84 | 72092  | 72651  | 1.84 | 1.30E-02 | transcription_start_site | + | 74279  | 74279  | -1907 | 20324 | AN4878 |
| 891  | CONTIG84 | 72092  | 72651  | 1.84 | 1.30E-02 | transcription_start_site | + | 75583  | 75583  | -3211 | 20325 | AN4878 |
| 316  | CONTIG84 | 77037  | 77311  | 2.6  | 2.61E-03 | transcription_start_site | + | 78668  | 78668  | -1494 | 20326 | AN4879 |
| 316  | CONTIG84 | 77037  | 77311  | 2.6  | 2.61E-03 | transcription_start_site | + | 78790  | 78790  | -1616 | 20327 | AN4879 |
| 1359 | CONTIG84 | 83852  | 84748  | 1.39 | 8.63E-02 | transcription_start_site | - | 82800  | 82800  | -1500 | 20328 | AN4880 |
| 1359 | CONTIG84 | 83852  | 84748  | 1.39 | 8.63E-02 | transcription_start_site | - | 82427  | 82427  | -1873 | 20329 | AN4880 |
| 1359 | CONTIG84 | 83852  | 84748  | 1.39 | 8.63E-02 | transcription_start_site | - | 82275  | 82275  | -2025 | 20330 | AN4880 |
| 1359 | CONTIG84 | 83852  | 84748  | 1.39 | 8.63E-02 | transcription_start_site | - | 80485  | 80485  | -3815 | 20331 | AN4880 |
| 1359 | CONTIG84 | 83852  | 84748  | 1.39 | 8.63E-02 | transcription_start_site | - | 80303  | 80303  | -3997 | 20332 | AN4880 |
| 1399 | CONTIG84 | 80187  | 80691  | 1.35 | 5.49E-02 | transcription_start_site | - | 80485  | 80485  | 46    | 20331 | AN4880 |
| 1399 | CONTIG84 | 80187  | 80691  | 1.35 | 5.49E-02 | transcription_start_site | - | 80303  | 80303  | -136  | 20332 | AN4880 |
| 1359 | CONTIG84 | 83852  | 84748  | 1.39 | 8.63E-02 | transcription_start_site | + | 84984  | 84984  | -684  | 20333 | AN4881 |
| 1359 | CONTIG84 | 83852  | 84748  | 1.39 | 8.63E-02 | transcription_start_site | + | 85105  | 85105  | -805  | 20334 | AN4881 |
| 1399 | CONTIG84 | 80187  | 80691  | 1.35 | 5.49E-02 | transcription_start_site | + | 84984  | 84984  | -4545 | 20333 | AN4881 |
| 1399 | CONTIG84 | 80187  | 80691  | 1.35 | 5.49E-02 | transcription_start_site | + | 85105  | 85105  | -4666 | 20334 | AN4881 |
| 1598 | CONTIG84 | 96837  | 97426  | 1.21 | 1.38E-01 | transcription_start_site | - | 92101  | 92101  | -5030 | 20339 | AN4883 |
| 1598 | CONTIG84 | 96837  | 97426  | 1.21 | 1.38E-01 | transcription_start_site | + | 101694 | 101694 | -4562 | 20346 | AN4886 |
| 1598 | CONTIG84 | 96837  | 97426  | 1.21 | 1.38E-01 | transcription_start_site | + | 101960 | 101960 | -4828 | 20347 | AN4886 |
| 1598 | CONTIG84 | 96837  | 97426  | 1.21 | 1.38E-01 | transcription_start_site | + | 102353 | 102353 | -5221 | 20348 | AN4886 |
| 1466 | CONTIG84 | 112670 | 112940 | 1.3  | 1.08E-01 | transcription_start_site | - | 109397 | 109397 | -3408 | 20350 | AN4887 |
| 1466 | CONTIG84 | 112670 | 112940 | 1.3  | 1.08E-01 | transcription_start_site | - | 112409 | 112409 | -396  | 20353 | AN4888 |
| 1466 | CONTIG84 | 112670 | 112940 | 1.3  | 1.08E-01 | transcription_start_site | - | 112242 | 112242 | -563  | 20354 | AN4888 |
| 1466 | CONTIG84 | 112670 | 112940 | 1.3  | 1.08E-01 | transcription_start_site | - | 112101 | 112101 | -704  | 20355 | AN4888 |
| 1466 | CONTIG84 | 112670 | 112940 | 1.3  | 1.08E-01 | transcription_start_site | - | 110821 | 110821 | -1984 | 20356 | AN4888 |
| 1466 | CONTIG84 | 112670 | 112940 | 1.3  | 1.08E-01 | transcription_start_site | - | 110562 | 110562 | -2243 | 20357 | AN4888 |
| 1466 | CONTIG84 | 112670 | 112940 | 1.3  | 1.08E-01 | transcription_start_site | + | 112977 | 112977 | -172  | 20358 | AN4889 |
| 1466 | CONTIG84 | 112670 | 112940 | 1.3  | 1.08E-01 | transcription_start_site | + | 113104 | 113104 | -299  | 20359 | AN4889 |
| 1466 | CONTIG84 | 112670 | 112940 | 1.3  | 1.08E-01 | transcription_start_site | + | 113295 | 113295 | -490  | 20360 | AN4889 |
| 1466 | CONTIG84 | 112670 | 112940 | 1.3  | 1.08E-01 | transcription_start_site | + | 113505 | 113505 | -700  | 20361 | AN4889 |
| 1466 | CONTIG84 | 112670 | 112940 | 1.3  | 1.08E-01 | transcription_start_site | + | 113779 | 113779 | -974  | 20362 | AN4889 |



|      |          |        |        |      |          |                          |   |        |        |       |       |        |
|------|----------|--------|--------|------|----------|--------------------------|---|--------|--------|-------|-------|--------|
| 1466 | CONTIG84 | 112670 | 112940 | 1.3  | 1.08E-01 | transcription_start_site | + | 113969 | 113969 | -1164 | 20363 | AN4889 |
| 1466 | CONTIG84 | 112670 | 112940 | 1.3  | 1.08E-01 | transcription_start_site | + | 116528 | 116528 | -3723 | 20364 | AN4890 |
| 1466 | CONTIG84 | 112670 | 112940 | 1.3  | 1.08E-01 | transcription_start_site | + | 116678 | 116678 | -3873 | 20365 | AN4890 |
| 1466 | CONTIG84 | 112670 | 112940 | 1.3  | 1.08E-01 | transcription_start_site | + | 117063 | 117063 | -4258 | 20366 | AN4890 |
| 118  | CONTIG84 | 141678 | 141962 | 3.05 | 2.26E-04 | transcription_start_site | - | 138755 | 138755 | -3065 | 20390 | AN4896 |
| 118  | CONTIG84 | 141678 | 141962 | 3.05 | 2.26E-04 | transcription_start_site | - | 138519 | 138519 | -3301 | 20391 | AN4896 |
| 118  | CONTIG84 | 141678 | 141962 | 3.05 | 2.26E-04 | transcription_start_site | - | 138202 | 138202 | -3618 | 20392 | AN4896 |
| 118  | CONTIG84 | 141678 | 141962 | 3.05 | 2.26E-04 | transcription_start_site | + | 142558 | 142558 | -738  | 20393 | AN4897 |
| 118  | CONTIG84 | 141678 | 141962 | 3.05 | 2.26E-04 | transcription_start_site | + | 144006 | 144006 | -2186 | 20394 | AN4898 |
| 118  | CONTIG84 | 141678 | 141962 | 3.05 | 2.26E-04 | transcription_start_site | + | 144091 | 144091 | -2271 | 20395 | AN4898 |
| 118  | CONTIG84 | 141678 | 141962 | 3.05 | 2.26E-04 | transcription_start_site | + | 144489 | 144489 | -2669 | 20396 | AN4898 |
| 118  | CONTIG84 | 141678 | 141962 | 3.05 | 2.26E-04 | transcription_start_site | + | 144847 | 144847 | -3027 | 20397 | AN4898 |
| 118  | CONTIG84 | 141678 | 141962 | 3.05 | 2.26E-04 | transcription_start_site | + | 144979 | 144979 | -3159 | 20398 | AN4898 |
| 118  | CONTIG84 | 141678 | 141962 | 3.05 | 2.26E-04 | transcription_start_site | + | 145585 | 145585 | -3765 | 20399 | AN4898 |
| 118  | CONTIG84 | 141678 | 141962 | 3.05 | 2.26E-04 | transcription_start_site | + | 146563 | 146563 | -4743 | 20400 | AN4898 |
| 647  | CONTIG84 | 149259 | 149693 | 2.11 | 4.92E-03 | transcription_start_site | - | 148476 | 148476 | -1000 | 20401 | AN4899 |
| 647  | CONTIG84 | 149259 | 149693 | 2.11 | 4.92E-03 | transcription_start_site | - | 148184 | 148184 | -1292 | 20402 | AN4899 |
| 647  | CONTIG84 | 149259 | 149693 | 2.11 | 4.92E-03 | transcription_start_site | - | 147322 | 147322 | -2154 | 20403 | AN4899 |
| 1156 | CONTIG84 | 149944 | 150731 | 1.57 | 5.36E-02 | transcription_start_site | - | 148476 | 148476 | -1861 | 20401 | AN4899 |
| 1156 | CONTIG84 | 149944 | 150731 | 1.57 | 5.36E-02 | transcription_start_site | - | 148184 | 148184 | -2153 | 20402 | AN4899 |
| 1156 | CONTIG84 | 149944 | 150731 | 1.57 | 5.36E-02 | transcription_start_site | - | 147322 | 147322 | -3015 | 20403 | AN4899 |
| 1404 | CONTIG84 | 151061 | 151332 | 1.35 | 9.60E-02 | transcription_start_site | - | 148476 | 148476 | -2720 | 20401 | AN4899 |
| 1404 | CONTIG84 | 151061 | 151332 | 1.35 | 9.60E-02 | transcription_start_site | - | 148184 | 148184 | -3012 | 20402 | AN4899 |
| 1404 | CONTIG84 | 151061 | 151332 | 1.35 | 9.60E-02 | transcription_start_site | - | 147322 | 147322 | -3874 | 20403 | AN4899 |
| 1727 | CONTIG84 | 153006 | 153370 | 1.12 | 1.76E-01 | transcription_start_site | - | 148476 | 148476 | -4712 | 20401 | AN4899 |
| 1727 | CONTIG84 | 153006 | 153370 | 1.12 | 1.76E-01 | transcription_start_site | - | 148184 | 148184 | -5004 | 20402 | AN4899 |
| 647  | CONTIG84 | 149259 | 149693 | 2.11 | 4.92E-03 | transcription_start_site | + | 150842 | 150842 | -1366 | 20404 | AN4900 |
| 647  | CONTIG84 | 149259 | 149693 | 2.11 | 4.92E-03 | transcription_start_site | + | 151360 | 151360 | -1884 | 20405 | AN4900 |
| 647  | CONTIG84 | 149259 | 149693 | 2.11 | 4.92E-03 | transcription_start_site | + | 151630 | 151630 | -2154 | 20406 | AN4900 |
| 647  | CONTIG84 | 149259 | 149693 | 2.11 | 4.92E-03 | transcription_start_site | + | 152180 | 152180 | -2704 | 20407 | AN4900 |
| 1156 | CONTIG84 | 149944 | 150731 | 1.57 | 5.36E-02 | transcription_start_site | + | 150842 | 150842 | -504  | 20404 | AN4900 |
| 1156 | CONTIG84 | 149944 | 150731 | 1.57 | 5.36E-02 | transcription_start_site | + | 151360 | 151360 | -1022 | 20405 | AN4900 |
| 1156 | CONTIG84 | 149944 | 150731 | 1.57 | 5.36E-02 | transcription_start_site | + | 151630 | 151630 | -1292 | 20406 | AN4900 |
| 1156 | CONTIG84 | 149944 | 150731 | 1.57 | 5.36E-02 | transcription_start_site | + | 152180 | 152180 | -1842 | 20407 | AN4900 |
| 1404 | CONTIG84 | 151061 | 151332 | 1.35 | 9.60E-02 | transcription_start_site | + | 151360 | 151360 | -163  | 20405 | AN4900 |
| 1404 | CONTIG84 | 151061 | 151332 | 1.35 | 9.60E-02 | transcription_start_site | + | 150842 | 150842 | 354   | 20404 | AN4900 |
| 1404 | CONTIG84 | 151061 | 151332 | 1.35 | 9.60E-02 | transcription_start_site | + | 151630 | 151630 | -433  | 20406 | AN4900 |
| 1404 | CONTIG84 | 151061 | 151332 | 1.35 | 9.60E-02 | transcription_start_site | + | 152180 | 152180 | -983  | 20407 | AN4900 |
| 1727 | CONTIG84 | 153006 | 153370 | 1.12 | 1.76E-01 | transcription_start_site | + | 152180 | 152180 | 1008  | 20407 | AN4900 |
| 1528 | CONTIG84 | 158101 | 158535 | 1.26 | 1.22E-01 | transcription_start_site | - | 158042 | 158042 | -276  | 20408 | AN4901 |
| 1528 | CONTIG84 | 158101 | 158535 | 1.26 | 1.22E-01 | transcription_start_site | - | 157732 | 157732 | -586  | 20409 | AN4901 |
| 1528 | CONTIG84 | 158101 | 158535 | 1.26 | 1.22E-01 | transcription_start_site | - | 157276 | 157276 | -1042 | 20410 | AN4901 |
| 1528 | CONTIG84 | 158101 | 158535 | 1.26 | 1.22E-01 | transcription_start_site | - | 156220 | 156220 | -2098 | 20411 | AN4901 |
| 1528 | CONTIG84 | 158101 | 158535 | 1.26 | 1.22E-01 | transcription_start_site | - | 156041 | 156041 | -2277 | 20412 | AN4901 |
| 1528 | CONTIG84 | 158101 | 158535 | 1.26 | 1.22E-01 | transcription_start_site | + | 159242 | 159242 | -924  | 20413 | AN4902 |
| 1528 | CONTIG84 | 158101 | 158535 | 1.26 | 1.22E-01 | transcription_start_site | + | 159689 | 159689 | -1371 | 20414 | AN4902 |
| 1157 | CONTIG84 | 172065 | 172404 | 1.57 | 5.36E-02 | transcription_start_site | - | 168821 | 168821 | -3413 | 20422 | AN4905 |
| 1157 | CONTIG84 | 172065 | 172404 | 1.57 | 5.36E-02 | transcription_start_site | - | 168537 | 168537 | -3697 | 20423 | AN4905 |
| 1157 | CONTIG84 | 172065 | 172404 | 1.57 | 5.36E-02 | transcription_start_site | - | 168433 | 168433 | -3801 | 20424 | AN4905 |
| 1157 | CONTIG84 | 172065 | 172404 | 1.57 | 5.36E-02 | transcription_start_site | - | 171357 | 171357 | -877  | 20425 | AN4906 |
| 1157 | CONTIG84 | 172065 | 172404 | 1.57 | 5.36E-02 | transcription_start_site | - | 170646 | 170646 | -1588 | 20426 | AN4906 |
| 1157 | CONTIG84 | 172065 | 172404 | 1.57 | 5.36E-02 | transcription_start_site | - | 170538 | 170538 | -1696 | 20427 | AN4906 |
| 856  | CONTIG84 | 185189 | 185692 | 1.88 | 2.29E-02 | transcription_start_site | - | 180837 | 180837 | -4603 | 20429 | AN4908 |
| 856  | CONTIG84 | 185189 | 185692 | 1.88 | 2.29E-02 | transcription_start_site | - | 180751 | 180751 | -4689 | 20430 | AN4908 |
| 856  | CONTIG84 | 185189 | 185692 | 1.88 | 2.29E-02 | transcription_start_site | - | 180619 | 180619 | -4821 | 20431 | AN4908 |
| 856  | CONTIG84 | 185189 | 185692 | 1.88 | 2.29E-02 | transcription_start_site | - | 180505 | 180505 | -4935 | 20432 | AN4908 |
| 1257 | CONTIG84 | 181439 | 181718 | 1.48 | 6.74E-02 | transcription_start_site | - | 180837 | 180837 | -741  | 20429 | AN4908 |

|      |          |        |        |      |          |                          |   |        |        |       |       |        |
|------|----------|--------|--------|------|----------|--------------------------|---|--------|--------|-------|-------|--------|
| 1257 | CONTIG84 | 181439 | 181718 | 1.48 | 6.74E-02 | transcription_start_site | - | 180751 | 180751 | -827  | 20430 | AN4908 |
| 1257 | CONTIG84 | 181439 | 181718 | 1.48 | 6.74E-02 | transcription_start_site | - | 180619 | 180619 | -959  | 20431 | AN4908 |
| 1257 | CONTIG84 | 181439 | 181718 | 1.48 | 6.74E-02 | transcription_start_site | - | 180505 | 180505 | -1073 | 20432 | AN4908 |
| 1257 | CONTIG84 | 181439 | 181718 | 1.48 | 6.74E-02 | transcription_start_site | - | 179254 | 179254 | -2324 | 20433 | AN4908 |
| 856  | CONTIG84 | 185189 | 185692 | 1.88 | 2.29E-02 | transcription_start_site | - | 182141 | 182141 | -3299 | 20434 | AN4909 |
| 856  | CONTIG84 | 185189 | 185692 | 1.88 | 2.29E-02 | transcription_start_site | - | 182053 | 182053 | -3387 | 20435 | AN4909 |
| 856  | CONTIG84 | 185189 | 185692 | 1.88 | 2.29E-02 | transcription_start_site | - | 181919 | 181919 | -3521 | 20436 | AN4909 |
| 856  | CONTIG84 | 185189 | 185692 | 1.88 | 2.29E-02 | transcription_start_site | - | 181588 | 181588 | -3852 | 20437 | AN4909 |
| 856  | CONTIG84 | 185189 | 185692 | 1.88 | 2.29E-02 | transcription_start_site | - | 181367 | 181367 | -4073 | 20438 | AN4909 |
| 1257 | CONTIG84 | 181439 | 181718 | 1.48 | 6.74E-02 | transcription_start_site | - | 181588 | 181588 | 9     | 20437 | AN4909 |
| 1257 | CONTIG84 | 181439 | 181718 | 1.48 | 6.74E-02 | transcription_start_site | - | 181367 | 181367 | -211  | 20438 | AN4909 |
| 1257 | CONTIG84 | 181439 | 181718 | 1.48 | 6.74E-02 | transcription_start_site | - | 181919 | 181919 | 340   | 20436 | AN4909 |
| 1257 | CONTIG84 | 181439 | 181718 | 1.48 | 6.74E-02 | transcription_start_site | - | 182053 | 182053 | 474   | 20435 | AN4909 |
| 1257 | CONTIG84 | 181439 | 181718 | 1.48 | 6.74E-02 | transcription_start_site | - | 182141 | 182141 | 562   | 20434 | AN4909 |
| 856  | CONTIG84 | 185189 | 185692 | 1.88 | 2.29E-02 | transcription_start_site | + | 184558 | 184558 | 882   | 20443 | AN4910 |
| 1257 | CONTIG84 | 181439 | 181718 | 1.48 | 6.74E-02 | transcription_start_site | + | 183124 | 183124 | -1545 | 20439 | AN4910 |
| 1257 | CONTIG84 | 181439 | 181718 | 1.48 | 6.74E-02 | transcription_start_site | + | 183446 | 183446 | -1867 | 20440 | AN4910 |
| 1257 | CONTIG84 | 181439 | 181718 | 1.48 | 6.74E-02 | transcription_start_site | + | 183864 | 183864 | -2285 | 20441 | AN4910 |
| 1257 | CONTIG84 | 181439 | 181718 | 1.48 | 6.74E-02 | transcription_start_site | + | 184167 | 184167 | -2588 | 20442 | AN4910 |
| 1257 | CONTIG84 | 181439 | 181718 | 1.48 | 6.74E-02 | transcription_start_site | + | 184558 | 184558 | -2979 | 20443 | AN4910 |
| 856  | CONTIG84 | 185189 | 185692 | 1.88 | 2.29E-02 | transcription_start_site | + | 185690 | 185690 | -249  | 20444 | AN4911 |
| 856  | CONTIG84 | 185189 | 185692 | 1.88 | 2.29E-02 | transcription_start_site | + | 186048 | 186048 | -607  | 20445 | AN4911 |
| 1257 | CONTIG84 | 181439 | 181718 | 1.48 | 6.74E-02 | transcription_start_site | + | 185690 | 185690 | -4111 | 20444 | AN4911 |
| 1257 | CONTIG84 | 181439 | 181718 | 1.48 | 6.74E-02 | transcription_start_site | + | 186048 | 186048 | -4469 | 20445 | AN4911 |
| 777  | CONTIG84 | 200028 | 200467 | 1.97 | 1.80E-02 | transcription_start_site | + | 205284 | 205284 | -5036 | 20462 | AN4915 |
| 1027 | CONTIG84 | 217126 | 217415 | 1.7  | 3.70E-02 | transcription_start_site | - | 212185 | 212185 | -5085 | 20473 | AN4919 |
| 1027 | CONTIG84 | 217126 | 217415 | 1.7  | 3.70E-02 | transcription_start_site | - | 216620 | 216620 | -650  | 20475 | AN4920 |
| 1027 | CONTIG84 | 217126 | 217415 | 1.7  | 3.70E-02 | transcription_start_site | - | 215670 | 215670 | -1600 | 20476 | AN4920 |
| 1027 | CONTIG84 | 217126 | 217415 | 1.7  | 3.70E-02 | transcription_start_site | - | 215186 | 215186 | -2084 | 20477 | AN4920 |
| 1027 | CONTIG84 | 217126 | 217415 | 1.7  | 3.70E-02 | transcription_start_site | - | 214994 | 214994 | -2276 | 20478 | AN4920 |
| 1027 | CONTIG84 | 217126 | 217415 | 1.7  | 3.70E-02 | transcription_start_site | + | 220432 | 220432 | -3161 | 20479 | AN4921 |
| 1027 | CONTIG84 | 217126 | 217415 | 1.7  | 3.70E-02 | transcription_start_site | + | 221610 | 221610 | -4339 | 20480 | AN4921 |
| 1792 | CONTIG84 | 230107 | 230753 | 1.08 | 1.34E-01 | transcription_start_site | - | 227439 | 227439 | -2991 | 20483 | AN4923 |
| 1792 | CONTIG84 | 230107 | 230753 | 1.08 | 1.34E-01 | transcription_start_site | - | 227221 | 227221 | -3209 | 20484 | AN4923 |
| 1792 | CONTIG84 | 230107 | 230753 | 1.08 | 1.34E-01 | transcription_start_site | - | 229471 | 229471 | -959  | 20485 | AN4924 |
| 1792 | CONTIG84 | 230107 | 230753 | 1.08 | 1.34E-01 | transcription_start_site | - | 229333 | 229333 | -1097 | 20486 | AN4924 |
| 1792 | CONTIG84 | 230107 | 230753 | 1.08 | 1.34E-01 | transcription_start_site | + | 231186 | 231186 | -756  | 20487 | AN4925 |
| 1792 | CONTIG84 | 230107 | 230753 | 1.08 | 1.34E-01 | transcription_start_site | + | 233707 | 233707 | -3277 | 20488 | AN4925 |
| 563  | CONTIG84 | 249471 | 250036 | 2.24 | 9.32E-03 | transcription_start_site | - | 247347 | 247347 | -2406 | 20496 | AN4929 |
| 563  | CONTIG84 | 249471 | 250036 | 2.24 | 9.32E-03 | transcription_start_site | - | 246358 | 246358 | -3395 | 20497 | AN4929 |
| 968  | CONTIG84 | 248029 | 248600 | 1.75 | 3.34E-02 | transcription_start_site | - | 247347 | 247347 | -967  | 20496 | AN4929 |
| 968  | CONTIG84 | 248029 | 248600 | 1.75 | 3.34E-02 | transcription_start_site | - | 246358 | 246358 | -1956 | 20497 | AN4929 |
| 563  | CONTIG84 | 249471 | 250036 | 2.24 | 9.32E-03 | transcription_start_site | + | 253493 | 253493 | -3739 | 20498 | AN4930 |
| 563  | CONTIG84 | 249471 | 250036 | 2.24 | 9.32E-03 | transcription_start_site | + | 254637 | 254637 | -4883 | 20499 | AN4930 |
| 968  | CONTIG84 | 248029 | 248600 | 1.75 | 3.34E-02 | transcription_start_site | + | 253493 | 253493 | -5178 | 20498 | AN4930 |
| 335  | CONTIG84 | 264909 | 265853 | 2.56 | 1.09E-03 | transcription_start_site | - | 263173 | 263173 | -2208 | 20509 | AN4935 |
| 335  | CONTIG84 | 264909 | 265853 | 2.56 | 1.09E-03 | transcription_start_site | - | 262460 | 262460 | -2921 | 20510 | AN4935 |
| 857  | CONTIG84 | 263644 | 264218 | 1.88 | 2.29E-02 | transcription_start_site | - | 263173 | 263173 | -758  | 20509 | AN4935 |
| 857  | CONTIG84 | 263644 | 264218 | 1.88 | 2.29E-02 | transcription_start_site | - | 262460 | 262460 | -1471 | 20510 | AN4935 |
| 428  | CONTIG84 | 270836 | 271330 | 2.42 | 5.08E-03 | transcription_start_site | - | 268912 | 268912 | -2171 | 20511 | AN4936 |
| 428  | CONTIG84 | 270836 | 271330 | 2.42 | 5.08E-03 | transcription_start_site | - | 268165 | 268165 | -2918 | 20512 | AN4936 |
| 428  | CONTIG84 | 270836 | 271330 | 2.42 | 5.08E-03 | transcription_start_site | - | 267905 | 267905 | -3178 | 20513 | AN4936 |
| 335  | CONTIG84 | 264909 | 265853 | 2.56 | 1.09E-03 | transcription_start_site | + | 269374 | 269374 | -3993 | 20514 | AN4937 |
| 335  | CONTIG84 | 264909 | 265853 | 2.56 | 1.09E-03 | transcription_start_site | + | 269462 | 269462 | -4081 | 20515 | AN4937 |
| 335  | CONTIG84 | 264909 | 265853 | 2.56 | 1.09E-03 | transcription_start_site | + | 269616 | 269616 | -4235 | 20516 | AN4937 |
| 428  | CONTIG84 | 270836 | 271330 | 2.42 | 5.08E-03 | transcription_start_site | - | 271664 | 271664 | 581   | 20518 | AN4938 |
| 428  | CONTIG84 | 270836 | 271330 | 2.42 | 5.08E-03 | transcription_start_site | - | 271860 | 271860 | 777   | 20517 | AN4938 |

|      |          |        |        |      |          |                          |   |        |        |       |       |        |
|------|----------|--------|--------|------|----------|--------------------------|---|--------|--------|-------|-------|--------|
| 428  | CONTIG84 | 270836 | 271330 | 2.42 | 5.08E-03 | transcription_start_site | + | 274571 | 274571 | -3488 | 20519 | AN4939 |
| 428  | CONTIG84 | 270836 | 271330 | 2.42 | 5.08E-03 | transcription_start_site | + | 274638 | 274638 | -3555 | 20520 | AN4939 |
| 428  | CONTIG84 | 270836 | 271330 | 2.42 | 5.08E-03 | transcription_start_site | + | 274731 | 274731 | -3648 | 20521 | AN4939 |
| 428  | CONTIG84 | 270836 | 271330 | 2.42 | 5.08E-03 | transcription_start_site | + | 275043 | 275043 | -3960 | 20522 | AN4939 |
| 429  | CONTIG84 | 277801 | 278245 | 2.42 | 5.08E-03 | transcription_start_site | - | 277490 | 277490 | -533  | 20523 | AN4940 |
| 429  | CONTIG84 | 277801 | 278245 | 2.42 | 5.08E-03 | transcription_start_site | - | 277350 | 277350 | -673  | 20524 | AN4940 |
| 429  | CONTIG84 | 277801 | 278245 | 2.42 | 5.08E-03 | transcription_start_site | - | 277248 | 277248 | -775  | 20525 | AN4940 |
| 429  | CONTIG84 | 277801 | 278245 | 2.42 | 5.08E-03 | transcription_start_site | - | 277054 | 277054 | -969  | 20526 | AN4940 |
| 429  | CONTIG84 | 277801 | 278245 | 2.42 | 5.08E-03 | transcription_start_site | - | 276214 | 276214 | -1809 | 20527 | AN4940 |
| 429  | CONTIG84 | 277801 | 278245 | 2.42 | 5.08E-03 | transcription_start_site | + | 278273 | 278273 | -250  | 20528 | AN4941 |
| 429  | CONTIG84 | 277801 | 278245 | 2.42 | 5.08E-03 | transcription_start_site | + | 278388 | 278388 | -365  | 20529 | AN4941 |
| 429  | CONTIG84 | 277801 | 278245 | 2.42 | 5.08E-03 | transcription_start_site | + | 278697 | 278697 | -674  | 20530 | AN4941 |
| 1028 | CONTIG84 | 285601 | 286040 | 1.7  | 3.70E-02 | transcription_start_site | - | 283294 | 283294 | -2526 | 20537 | AN4943 |
| 1028 | CONTIG84 | 285601 | 286040 | 1.7  | 3.70E-02 | transcription_start_site | + | 284825 | 284825 | 995   | 20539 | AN4944 |
| 1028 | CONTIG84 | 285601 | 286040 | 1.7  | 3.70E-02 | transcription_start_site | + | 286718 | 286718 | -897  | 20540 | AN4945 |
| 1028 | CONTIG84 | 285601 | 286040 | 1.7  | 3.70E-02 | transcription_start_site | + | 289608 | 289608 | -3787 | 20541 | AN4946 |
| 1028 | CONTIG84 | 285601 | 286040 | 1.7  | 3.70E-02 | transcription_start_site | + | 289824 | 289824 | -4003 | 20542 | AN4946 |
| 1028 | CONTIG84 | 285601 | 286040 | 1.7  | 3.70E-02 | transcription_start_site | + | 290476 | 290476 | -4655 | 20543 | AN4947 |
| 1028 | CONTIG84 | 285601 | 286040 | 1.7  | 3.70E-02 | transcription_start_site | + | 290670 | 290670 | -4849 | 20544 | AN4947 |
| 1795 | CONTIG84 | 314253 | 314602 | 1.08 | 1.97E-01 | transcription_start_site | - | 311037 | 311037 | -3390 | 20567 | AN4955 |
| 1795 | CONTIG84 | 314253 | 314602 | 1.08 | 1.97E-01 | transcription_start_site | - | 310551 | 310551 | -3876 | 20568 | AN4955 |
| 1795 | CONTIG84 | 314253 | 314602 | 1.08 | 1.97E-01 | transcription_start_site | - | 314263 | 314263 | -164  | 20569 | AN4956 |
| 1795 | CONTIG84 | 314253 | 314602 | 1.08 | 1.97E-01 | transcription_start_site | - | 314042 | 314042 | -385  | 20570 | AN4956 |
| 1795 | CONTIG84 | 314253 | 314602 | 1.08 | 1.97E-01 | transcription_start_site | - | 313881 | 313881 | -546  | 20571 | AN4956 |
| 1795 | CONTIG84 | 314253 | 314602 | 1.08 | 1.97E-01 | transcription_start_site | - | 313760 | 313760 | -667  | 20572 | AN4956 |
| 1795 | CONTIG84 | 314253 | 314602 | 1.08 | 1.97E-01 | transcription_start_site | - | 312020 | 312020 | -2407 | 20573 | AN4956 |
| 1795 | CONTIG84 | 314253 | 314602 | 1.08 | 1.97E-01 | transcription_start_site | + | 315321 | 315321 | -893  | 20574 | AN4957 |
| 1795 | CONTIG84 | 314253 | 314602 | 1.08 | 1.97E-01 | transcription_start_site | + | 316023 | 316023 | -1595 | 20575 | AN4957 |
| 1795 | CONTIG84 | 314253 | 314602 | 1.08 | 1.97E-01 | transcription_start_site | + | 316960 | 316960 | -2532 | 20576 | AN4957 |
| 1795 | CONTIG84 | 314253 | 314602 | 1.08 | 1.97E-01 | transcription_start_site | + | 319339 | 319339 | -4911 | 20578 | AN4959 |
| 30   | CONTIG84 | 365719 | 366213 | 3.36 | 0.00E+00 | transcription_start_site | - | 362115 | 362115 | -3851 | 20612 | AN4972 |
| 30   | CONTIG84 | 365719 | 366213 | 3.36 | 0.00E+00 | transcription_start_site | - | 361680 | 361680 | -4286 | 20613 | AN4972 |
| 30   | CONTIG84 | 365719 | 366213 | 3.36 | 0.00E+00 | transcription_start_site | - | 361514 | 361514 | -4452 | 20614 | AN4972 |
| 30   | CONTIG84 | 365719 | 366213 | 3.36 | 0.00E+00 | transcription_start_site | - | 360729 | 360729 | -5237 | 20615 | AN4972 |
| 30   | CONTIG84 | 365719 | 366213 | 3.36 | 0.00E+00 | transcription_start_site | - | 364628 | 364628 | -1338 | 20616 | AN4973 |
| 30   | CONTIG84 | 365719 | 366213 | 3.36 | 0.00E+00 | transcription_start_site | - | 364140 | 364140 | -1826 | 20617 | AN4973 |
| 430  | CONTIG84 | 372993 | 373267 | 2.42 | 5.08E-03 | transcription_start_site | - | 368654 | 368654 | -4476 | 20618 | AN4974 |
| 430  | CONTIG84 | 372993 | 373267 | 2.42 | 5.08E-03 | transcription_start_site | - | 368489 | 368489 | -4641 | 20619 | AN4974 |
| 30   | CONTIG84 | 365719 | 366213 | 3.36 | 0.00E+00 | transcription_start_site | + | 368981 | 368981 | -3015 | 20620 | AN4975 |
| 30   | CONTIG84 | 365719 | 366213 | 3.36 | 0.00E+00 | transcription_start_site | + | 369125 | 369125 | -3159 | 20621 | AN4975 |
| 30   | CONTIG84 | 365719 | 366213 | 3.36 | 0.00E+00 | transcription_start_site | + | 370173 | 370173 | -4207 | 20622 | AN4975 |
| 430  | CONTIG84 | 372993 | 373267 | 2.42 | 5.08E-03 | transcription_start_site | - | 372220 | 372220 | -910  | 20623 | AN4976 |
| 430  | CONTIG84 | 372993 | 373267 | 2.42 | 5.08E-03 | transcription_start_site | - | 371869 | 371869 | -1261 | 20624 | AN4976 |
| 430  | CONTIG84 | 372993 | 373267 | 2.42 | 5.08E-03 | transcription_start_site | - | 371711 | 371711 | -1419 | 20625 | AN4976 |
| 516  | CONTIG84 | 376578 | 376941 | 2.29 | 3.81E-03 | transcription_start_site | - | 372220 | 372220 | -4539 | 20623 | AN4976 |
| 516  | CONTIG84 | 376578 | 376941 | 2.29 | 3.81E-03 | transcription_start_site | - | 371869 | 371869 | -4890 | 20624 | AN4976 |
| 516  | CONTIG84 | 376578 | 376941 | 2.29 | 3.81E-03 | transcription_start_site | - | 371711 | 371711 | -5048 | 20625 | AN4976 |
| 893  | CONTIG84 | 373963 | 374452 | 1.84 | 2.63E-02 | transcription_start_site | - | 372220 | 372220 | -1987 | 20623 | AN4976 |
| 893  | CONTIG84 | 373963 | 374452 | 1.84 | 2.63E-02 | transcription_start_site | - | 371869 | 371869 | -2338 | 20624 | AN4976 |
| 893  | CONTIG84 | 373963 | 374452 | 1.84 | 2.63E-02 | transcription_start_site | - | 371711 | 371711 | -2496 | 20625 | AN4976 |
| 430  | CONTIG84 | 372993 | 373267 | 2.42 | 5.08E-03 | transcription_start_site | + | 374527 | 374527 | -1397 | 20626 | AN4977 |
| 430  | CONTIG84 | 372993 | 373267 | 2.42 | 5.08E-03 | transcription_start_site | + | 374893 | 374893 | -1763 | 20627 | AN4977 |
| 430  | CONTIG84 | 372993 | 373267 | 2.42 | 5.08E-03 | transcription_start_site | + | 376468 | 376468 | -3338 | 20628 | AN4977 |
| 516  | CONTIG84 | 376578 | 376941 | 2.29 | 3.81E-03 | transcription_start_site | + | 376468 | 376468 | 291   | 20628 | AN4977 |
| 893  | CONTIG84 | 373963 | 374452 | 1.84 | 2.63E-02 | transcription_start_site | + | 374527 | 374527 | -319  | 20626 | AN4977 |
| 893  | CONTIG84 | 373963 | 374452 | 1.84 | 2.63E-02 | transcription_start_site | + | 374893 | 374893 | -685  | 20627 | AN4977 |
| 893  | CONTIG84 | 373963 | 374452 | 1.84 | 2.63E-02 | transcription_start_site | + | 376468 | 376468 | -2260 | 20628 | AN4977 |

|      |          |        |        |      |          |                          |   |        |        |       |       |        |
|------|----------|--------|--------|------|----------|--------------------------|---|--------|--------|-------|-------|--------|
| 430  | CONTIG84 | 372993 | 373267 | 2.42 | 5.08E-03 | transcription_start_site | + | 377474 | 377474 | -4344 | 20629 | AN4978 |
| 430  | CONTIG84 | 372993 | 373267 | 2.42 | 5.08E-03 | transcription_start_site | + | 377877 | 377877 | -4747 | 20630 | AN4978 |
| 430  | CONTIG84 | 372993 | 373267 | 2.42 | 5.08E-03 | transcription_start_site | + | 378056 | 378056 | -4926 | 20631 | AN4978 |
| 430  | CONTIG84 | 372993 | 373267 | 2.42 | 5.08E-03 | transcription_start_site | + | 378116 | 378116 | -4986 | 20632 | AN4978 |
| 516  | CONTIG84 | 376578 | 376941 | 2.29 | 3.81E-03 | transcription_start_site | + | 377474 | 377474 | -714  | 20629 | AN4978 |
| 516  | CONTIG84 | 376578 | 376941 | 2.29 | 3.81E-03 | transcription_start_site | + | 377877 | 377877 | -1117 | 20630 | AN4978 |
| 516  | CONTIG84 | 376578 | 376941 | 2.29 | 3.81E-03 | transcription_start_site | + | 378056 | 378056 | -1296 | 20631 | AN4978 |
| 516  | CONTIG84 | 376578 | 376941 | 2.29 | 3.81E-03 | transcription_start_site | + | 378116 | 378116 | -1356 | 20632 | AN4978 |
| 516  | CONTIG84 | 376578 | 376941 | 2.29 | 3.81E-03 | transcription_start_site | + | 378659 | 378659 | -1899 | 20633 | AN4978 |
| 516  | CONTIG84 | 376578 | 376941 | 2.29 | 3.81E-03 | transcription_start_site | + | 378787 | 378787 | -2027 | 20634 | AN4978 |
| 516  | CONTIG84 | 376578 | 376941 | 2.29 | 3.81E-03 | transcription_start_site | + | 378943 | 378943 | -2183 | 20635 | AN4978 |
| 893  | CONTIG84 | 373963 | 374452 | 1.84 | 2.63E-02 | transcription_start_site | + | 377474 | 377474 | -3266 | 20629 | AN4978 |
| 893  | CONTIG84 | 373963 | 374452 | 1.84 | 2.63E-02 | transcription_start_site | + | 377877 | 377877 | -3669 | 20630 | AN4978 |
| 893  | CONTIG84 | 373963 | 374452 | 1.84 | 2.63E-02 | transcription_start_site | + | 378056 | 378056 | -3848 | 20631 | AN4978 |
| 893  | CONTIG84 | 373963 | 374452 | 1.84 | 2.63E-02 | transcription_start_site | + | 378116 | 378116 | -3908 | 20632 | AN4978 |
| 893  | CONTIG84 | 373963 | 374452 | 1.84 | 2.63E-02 | transcription_start_site | + | 378659 | 378659 | -4451 | 20633 | AN4978 |
| 893  | CONTIG84 | 373963 | 374452 | 1.84 | 2.63E-02 | transcription_start_site | + | 378787 | 378787 | -4579 | 20634 | AN4978 |
| 893  | CONTIG84 | 373963 | 374452 | 1.84 | 2.63E-02 | transcription_start_site | + | 378943 | 378943 | -4735 | 20635 | AN4978 |
| 516  | CONTIG84 | 376578 | 376941 | 2.29 | 3.81E-03 | transcription_start_site | + | 380005 | 380005 | -3245 | 20636 | AN4979 |
| 516  | CONTIG84 | 376578 | 376941 | 2.29 | 3.81E-03 | transcription_start_site | + | 380939 | 380939 | -4179 | 20637 | AN4979 |
| 195  | CONTIG84 | 396320 | 396819 | 2.83 | 1.09E-03 | transcription_start_site | - | 395471 | 395471 | -1098 | 20644 | AN4984 |
| 69   | CONTIG84 | 407420 | 407979 | 3.18 | 0.00E+00 | transcription_start_site | - | 402654 | 402654 | -5045 | 20645 | AN4985 |
| 969  | CONTIG84 | 405765 | 406416 | 1.75 | 3.34E-02 | transcription_start_site | - | 402654 | 402654 | -3436 | 20645 | AN4985 |
| 69   | CONTIG84 | 407420 | 407979 | 3.18 | 0.00E+00 | transcription_start_site | - | 405592 | 405592 | -2107 | 20648 | AN4987 |
| 969  | CONTIG84 | 405765 | 406416 | 1.75 | 3.34E-02 | transcription_start_site | - | 405592 | 405592 | -498  | 20648 | AN4987 |
| 1458 | CONTIG84 | 409130 | 410529 | 1.3  | 4.51E-02 | transcription_start_site | - | 405592 | 405592 | -4237 | 20648 | AN4987 |
| 69   | CONTIG84 | 407420 | 407979 | 3.18 | 0.00E+00 | transcription_start_site | + | 407908 | 407908 | -208  | 20649 | AN4988 |
| 69   | CONTIG84 | 407420 | 407979 | 3.18 | 0.00E+00 | transcription_start_site | + | 408015 | 408015 | -315  | 20650 | AN4988 |
| 69   | CONTIG84 | 407420 | 407979 | 3.18 | 0.00E+00 | transcription_start_site | + | 408430 | 408430 | -730  | 20651 | AN4988 |
| 969  | CONTIG84 | 405765 | 406416 | 1.75 | 3.34E-02 | transcription_start_site | + | 407908 | 407908 | -1817 | 20649 | AN4988 |
| 969  | CONTIG84 | 405765 | 406416 | 1.75 | 3.34E-02 | transcription_start_site | + | 408015 | 408015 | -1924 | 20650 | AN4988 |
| 969  | CONTIG84 | 405765 | 406416 | 1.75 | 3.34E-02 | transcription_start_site | + | 408430 | 408430 | -2339 | 20651 | AN4988 |
| 1458 | CONTIG84 | 409130 | 410529 | 1.3  | 4.51E-02 | transcription_start_site | + | 408430 | 408430 | 1399  | 20651 | AN4988 |
| 69   | CONTIG84 | 407420 | 407979 | 3.18 | 0.00E+00 | transcription_start_site | + | 411117 | 411117 | -3417 | 20652 | AN4989 |
| 69   | CONTIG84 | 407420 | 407979 | 3.18 | 0.00E+00 | transcription_start_site | + | 411406 | 411406 | -3706 | 20653 | AN4989 |
| 69   | CONTIG84 | 407420 | 407979 | 3.18 | 0.00E+00 | transcription_start_site | + | 411604 | 411604 | -3904 | 20654 | AN4989 |
| 969  | CONTIG84 | 405765 | 406416 | 1.75 | 3.34E-02 | transcription_start_site | + | 411117 | 411117 | -5026 | 20652 | AN4989 |
| 969  | CONTIG84 | 405765 | 406416 | 1.75 | 3.34E-02 | transcription_start_site | + | 411406 | 411406 | -5315 | 20653 | AN4989 |
| 1458 | CONTIG84 | 409130 | 410529 | 1.3  | 4.51E-02 | transcription_start_site | + | 411117 | 411117 | -1287 | 20652 | AN4989 |
| 1458 | CONTIG84 | 409130 | 410529 | 1.3  | 4.51E-02 | transcription_start_site | + | 411406 | 411406 | -1576 | 20653 | AN4989 |
| 1458 | CONTIG84 | 409130 | 410529 | 1.3  | 4.51E-02 | transcription_start_site | + | 411604 | 411604 | -1774 | 20654 | AN4989 |
| 1872 | CONTIG84 | 412580 | 413096 | 1.03 | 1.57E-01 | transcription_start_site | + | 411604 | 411604 | 1234  | 20654 | AN4989 |
| 1458 | CONTIG84 | 409130 | 410529 | 1.3  | 4.51E-02 | transcription_start_site | + | 413152 | 413152 | -3322 | 20655 | AN4990 |
| 1458 | CONTIG84 | 409130 | 410529 | 1.3  | 4.51E-02 | transcription_start_site | + | 413547 | 413547 | -3717 | 20656 | AN4990 |
| 1872 | CONTIG84 | 412580 | 413096 | 1.03 | 1.57E-01 | transcription_start_site | + | 413152 | 413152 | -314  | 20655 | AN4990 |
| 1872 | CONTIG84 | 412580 | 413096 | 1.03 | 1.57E-01 | transcription_start_site | + | 413547 | 413547 | -709  | 20656 | AN4990 |
| 334  | CONTIG84 | 417092 | 418261 | 2.56 | 0.00E+00 | transcription_start_site | + | 418807 | 418807 | -1130 | 20657 | AN4991 |
| 334  | CONTIG84 | 417092 | 418261 | 2.56 | 0.00E+00 | transcription_start_site | + | 419285 | 419285 | -1608 | 20658 | AN4991 |
| 1158 | CONTIG84 | 415967 | 416467 | 1.57 | 5.36E-02 | transcription_start_site | + | 418807 | 418807 | -2590 | 20657 | AN4991 |
| 1158 | CONTIG84 | 415967 | 416467 | 1.57 | 5.36E-02 | transcription_start_site | + | 419285 | 419285 | -3068 | 20658 | AN4991 |
| 490  | CONTIG84 | 439427 | 439926 | 2.33 | 3.17E-03 | transcription_start_site | - | 437543 | 437543 | -2133 | 20672 | AN4998 |
| 490  | CONTIG84 | 439427 | 439926 | 2.33 | 3.17E-03 | transcription_start_site | - | 437372 | 437372 | -2304 | 20673 | AN4998 |
| 490  | CONTIG84 | 439427 | 439926 | 2.33 | 3.17E-03 | transcription_start_site | - | 437184 | 437184 | -2492 | 20674 | AN4998 |
| 490  | CONTIG84 | 439427 | 439926 | 2.33 | 3.17E-03 | transcription_start_site | - | 440442 | 440442 | 765   | 20678 | AN4999 |
| 490  | CONTIG84 | 439427 | 439926 | 2.33 | 3.17E-03 | transcription_start_site | - | 440636 | 440636 | 959   | 20677 | AN4999 |
| 490  | CONTIG84 | 439427 | 439926 | 2.33 | 3.17E-03 | transcription_start_site | + | 441951 | 441951 | -2274 | 20679 | AN5000 |
| 490  | CONTIG84 | 439427 | 439926 | 2.33 | 3.17E-03 | transcription_start_site | + | 442243 | 442243 | -2566 | 20680 | AN5000 |

|      |          |        |        |      |          |                          |   |        |        |       |       |        |
|------|----------|--------|--------|------|----------|--------------------------|---|--------|--------|-------|-------|--------|
| 490  | CONTIG84 | 439427 | 439926 | 2.33 | 3.17E-03 | transcription_start_site | + | 442521 | 442521 | -2844 | 20681 | AN5000 |
| 490  | CONTIG84 | 439427 | 439926 | 2.33 | 3.17E-03 | transcription_start_site | + | 442694 | 442694 | -3017 | 20682 | AN5000 |
| 490  | CONTIG84 | 439427 | 439926 | 2.33 | 3.17E-03 | transcription_start_site | + | 443934 | 443934 | -4257 | 20683 | AN5001 |
| 24   | CONTIG84 | 451732 | 452156 | 3.41 | 0.00E+00 | transcription_start_site | + | 454782 | 454782 | -2838 | 20688 | AN5003 |
| 196  | CONTIG84 | 452412 | 453291 | 2.83 | 1.09E-03 | transcription_start_site | + | 454782 | 454782 | -1930 | 20688 | AN5003 |
| 196  | CONTIG84 | 452412 | 453291 | 2.83 | 1.09E-03 | transcription_start_site | + | 457755 | 457755 | -4903 | 20689 | AN5004 |
| 196  | CONTIG84 | 452412 | 453291 | 2.83 | 1.09E-03 | transcription_start_site | + | 457945 | 457945 | -5093 | 20690 | AN5004 |
| 196  | CONTIG84 | 452412 | 453291 | 2.83 | 1.09E-03 | transcription_start_site | + | 458105 | 458105 | -5253 | 20691 | AN5004 |
| 1661 | CONTIG84 | 485401 | 485976 | 1.17 | 1.54E-01 | transcription_start_site | + | 485745 | 485745 | -56   | 20725 | AN5012 |
| 1661 | CONTIG84 | 485401 | 485976 | 1.17 | 1.54E-01 | transcription_start_site | + | 485423 | 485423 | 265   | 20724 | AN5012 |
| 1661 | CONTIG84 | 485401 | 485976 | 1.17 | 1.54E-01 | transcription_start_site | + | 485283 | 485283 | 405   | 20723 | AN5012 |
| 1661 | CONTIG84 | 485401 | 485976 | 1.17 | 1.54E-01 | transcription_start_site | + | 485213 | 485213 | 475   | 20722 | AN5012 |
| 1661 | CONTIG84 | 485401 | 485976 | 1.17 | 1.54E-01 | transcription_start_site | + | 486269 | 486269 | -580  | 20726 | AN5012 |
| 1661 | CONTIG84 | 485401 | 485976 | 1.17 | 1.54E-01 | transcription_start_site | + | 485083 | 485083 | 605   | 20721 | AN5012 |
| 1661 | CONTIG84 | 485401 | 485976 | 1.17 | 1.54E-01 | transcription_start_site | + | 484807 | 484807 | 881   | 20720 | AN5012 |
| 1661 | CONTIG84 | 485401 | 485976 | 1.17 | 1.54E-01 | transcription_start_site | + | 484638 | 484638 | 1050  | 20719 | AN5012 |
| 1661 | CONTIG84 | 485401 | 485976 | 1.17 | 1.54E-01 | transcription_start_site | + | 489071 | 489071 | -3382 | 20727 | AN5013 |
| 225  | CONTIG84 | 494346 | 494836 | 2.78 | 1.45E-03 | transcription_start_site | - | 492012 | 492012 | -2579 | 20728 | AN5014 |
| 225  | CONTIG84 | 494346 | 494836 | 2.78 | 1.45E-03 | transcription_start_site | - | 491805 | 491805 | -2786 | 20729 | AN5014 |
| 225  | CONTIG84 | 494346 | 494836 | 2.78 | 1.45E-03 | transcription_start_site | - | 491503 | 491503 | -3088 | 20730 | AN5014 |
| 2009 | CONTIG84 | 492166 | 493028 | 0.94 | 1.64E-01 | transcription_start_site | - | 492012 | 492012 | -585  | 20728 | AN5014 |
| 2009 | CONTIG84 | 492166 | 493028 | 0.94 | 1.64E-01 | transcription_start_site | - | 491805 | 491805 | -792  | 20729 | AN5014 |
| 2009 | CONTIG84 | 492166 | 493028 | 0.94 | 1.64E-01 | transcription_start_site | - | 491503 | 491503 | -1094 | 20730 | AN5014 |
| 225  | CONTIG84 | 494346 | 494836 | 2.78 | 1.45E-03 | transcription_start_site | + | 494859 | 494859 | -268  | 20731 | AN5015 |
| 225  | CONTIG84 | 494346 | 494836 | 2.78 | 1.45E-03 | transcription_start_site | + | 495065 | 495065 | -474  | 20732 | AN5015 |
| 2009 | CONTIG84 | 492166 | 493028 | 0.94 | 1.64E-01 | transcription_start_site | + | 494859 | 494859 | -2262 | 20731 | AN5015 |
| 2009 | CONTIG84 | 492166 | 493028 | 0.94 | 1.64E-01 | transcription_start_site | + | 495065 | 495065 | -2468 | 20732 | AN5015 |
| 1029 | CONTIG84 | 499727 | 500016 | 1.7  | 3.70E-02 | transcription_start_site | - | 497230 | 497230 | -2641 | 20733 | AN5016 |
| 1029 | CONTIG84 | 499727 | 500016 | 1.7  | 3.70E-02 | transcription_start_site | - | 496910 | 496910 | -2961 | 20734 | AN5016 |
| 1029 | CONTIG84 | 499727 | 500016 | 1.7  | 3.70E-02 | transcription_start_site | - | 496446 | 496446 | -3425 | 20735 | AN5016 |
| 1029 | CONTIG84 | 499727 | 500016 | 1.7  | 3.70E-02 | transcription_start_site | - | 499396 | 499396 | -475  | 20736 | AN5017 |
| 1029 | CONTIG84 | 499727 | 500016 | 1.7  | 3.70E-02 | transcription_start_site | - | 499045 | 499045 | -826  | 20737 | AN5017 |
| 1662 | CONTIG84 | 508969 | 509243 | 1.17 | 1.54E-01 | transcription_start_site | - | 506349 | 506349 | -2757 | 20741 | AN5019 |
| 1662 | CONTIG84 | 508969 | 509243 | 1.17 | 1.54E-01 | transcription_start_site | - | 506213 | 506213 | -2893 | 20742 | AN5019 |
| 1662 | CONTIG84 | 508969 | 509243 | 1.17 | 1.54E-01 | transcription_start_site | - | 505892 | 505892 | -3214 | 20743 | AN5019 |
| 1662 | CONTIG84 | 508969 | 509243 | 1.17 | 1.54E-01 | transcription_start_site | - | 505427 | 505427 | -3679 | 20744 | AN5019 |
| 1662 | CONTIG84 | 508969 | 509243 | 1.17 | 1.54E-01 | transcription_start_site | - | 508272 | 508272 | -834  | 20745 | AN5020 |
| 1662 | CONTIG84 | 508969 | 509243 | 1.17 | 1.54E-01 | transcription_start_site | - | 508120 | 508120 | -986  | 20746 | AN5020 |
| 1662 | CONTIG84 | 508969 | 509243 | 1.17 | 1.54E-01 | transcription_start_site | - | 507909 | 507909 | -1197 | 20747 | AN5020 |
| 1662 | CONTIG84 | 508969 | 509243 | 1.17 | 1.54E-01 | transcription_start_site | - | 507711 | 507711 | -1395 | 20748 | AN5020 |
| 1662 | CONTIG84 | 508969 | 509243 | 1.17 | 1.54E-01 | transcription_start_site | - | 507547 | 507547 | -1559 | 20749 | AN5020 |
| 1662 | CONTIG84 | 508969 | 509243 | 1.17 | 1.54E-01 | transcription_start_site | + | 509196 | 509196 | -90   | 20750 | AN5021 |
| 1662 | CONTIG84 | 508969 | 509243 | 1.17 | 1.54E-01 | transcription_start_site | + | 509287 | 509287 | -181  | 20751 | AN5021 |
| 1662 | CONTIG84 | 508969 | 509243 | 1.17 | 1.54E-01 | transcription_start_site | + | 509456 | 509456 | -350  | 20752 | AN5021 |
| 1662 | CONTIG84 | 508969 | 509243 | 1.17 | 1.54E-01 | transcription_start_site | + | 509917 | 509917 | -811  | 20753 | AN5021 |
| 1662 | CONTIG84 | 508969 | 509243 | 1.17 | 1.54E-01 | transcription_start_site | + | 510239 | 510239 | -1133 | 20754 | AN5021 |
| 1662 | CONTIG84 | 508969 | 509243 | 1.17 | 1.54E-01 | transcription_start_site | + | 510861 | 510861 | -1755 | 20755 | AN5021 |
| 593  | CONTIG84 | 522228 | 522507 | 2.2  | 9.96E-03 | transcription_start_site | - | 522413 | 522413 | 45    | 20777 | AN5026 |
| 1159 | CONTIG84 | 526881 | 527300 | 1.57 | 5.36E-02 | transcription_start_site | - | 522413 | 522413 | -4677 | 20777 | AN5026 |
| 1159 | CONTIG84 | 526881 | 527300 | 1.57 | 5.36E-02 | transcription_start_site | - | 525540 | 525540 | -1550 | 20778 | AN5027 |
| 1159 | CONTIG84 | 526881 | 527300 | 1.57 | 5.36E-02 | transcription_start_site | - | 525362 | 525362 | -1728 | 20779 | AN5027 |
| 1159 | CONTIG84 | 526881 | 527300 | 1.57 | 5.36E-02 | transcription_start_site | + | 529075 | 529075 | -1984 | 20780 | AN5028 |
| 1159 | CONTIG84 | 526881 | 527300 | 1.57 | 5.36E-02 | transcription_start_site | + | 529567 | 529567 | -2476 | 20781 | AN5028 |
| 1159 | CONTIG84 | 526881 | 527300 | 1.57 | 5.36E-02 | transcription_start_site | + | 529718 | 529718 | -2627 | 20782 | AN5028 |
| 1159 | CONTIG84 | 526881 | 527300 | 1.57 | 5.36E-02 | transcription_start_site | + | 530011 | 530011 | -2920 | 20783 | AN5028 |
| 1159 | CONTIG84 | 526881 | 527300 | 1.57 | 5.36E-02 | transcription_start_site | + | 530270 | 530270 | -3179 | 20784 | AN5028 |
| 1159 | CONTIG84 | 526881 | 527300 | 1.57 | 5.36E-02 | transcription_start_site | + | 530459 | 530459 | -3368 | 20785 | AN5028 |

|      |          |        |        |      |          |                          |   |        |        |       |       |        |
|------|----------|--------|--------|------|----------|--------------------------|---|--------|--------|-------|-------|--------|
| 1159 | CONTIG84 | 526881 | 527300 | 1.57 | 5.36E-02 | transcription_start_site | + | 530597 | 530597 | -3506 | 20786 | AN5028 |
| 1159 | CONTIG84 | 526881 | 527300 | 1.57 | 5.36E-02 | transcription_start_site | + | 530978 | 530978 | -3887 | 20787 | AN5028 |
| 1159 | CONTIG84 | 526881 | 527300 | 1.57 | 5.36E-02 | transcription_start_site | + | 531370 | 531370 | -4279 | 20788 | AN5028 |
| 1159 | CONTIG84 | 526881 | 527300 | 1.57 | 5.36E-02 | transcription_start_site | + | 531906 | 531906 | -4815 | 20789 | AN5028 |
| 1400 | CONTIG84 | 543832 | 544261 | 1.35 | 5.49E-02 | transcription_start_site | - | 539480 | 539480 | -4566 | 20797 | AN5031 |
| 1400 | CONTIG84 | 543832 | 544261 | 1.35 | 5.49E-02 | transcription_start_site | - | 539348 | 539348 | -4698 | 20798 | AN5031 |
| 1400 | CONTIG84 | 543832 | 544261 | 1.35 | 5.49E-02 | transcription_start_site | - | 538973 | 538973 | -5073 | 20799 | AN5031 |
| 1400 | CONTIG84 | 543832 | 544261 | 1.35 | 5.49E-02 | transcription_start_site | + | 544673 | 544673 | -626  | 20805 | AN5033 |
| 1400 | CONTIG84 | 543832 | 544261 | 1.35 | 5.49E-02 | transcription_start_site | + | 544958 | 544958 | -911  | 20806 | AN5033 |
| 1400 | CONTIG84 | 543832 | 544261 | 1.35 | 5.49E-02 | transcription_start_site | + | 545053 | 545053 | -1006 | 20807 | AN5033 |
| 1400 | CONTIG84 | 543832 | 544261 | 1.35 | 5.49E-02 | transcription_start_site | + | 545275 | 545275 | -1228 | 20808 | AN5033 |
| 1400 | CONTIG84 | 543832 | 544261 | 1.35 | 5.49E-02 | transcription_start_site | + | 545396 | 545396 | -1349 | 20809 | AN5033 |
| 1400 | CONTIG84 | 543832 | 544261 | 1.35 | 5.49E-02 | transcription_start_site | + | 545802 | 545802 | -1755 | 20810 | AN5033 |
| 1400 | CONTIG84 | 543832 | 544261 | 1.35 | 5.49E-02 | transcription_start_site | + | 545894 | 545894 | -1847 | 20811 | AN5033 |
| 1400 | CONTIG84 | 543832 | 544261 | 1.35 | 5.49E-02 | transcription_start_site | + | 546398 | 546398 | -2351 | 20812 | AN5033 |
| 1400 | CONTIG84 | 543832 | 544261 | 1.35 | 5.49E-02 | transcription_start_site | + | 546641 | 546641 | -2594 | 20813 | AN5033 |
| 1400 | CONTIG84 | 543832 | 544261 | 1.35 | 5.49E-02 | transcription_start_site | + | 548987 | 548987 | -4940 | 20814 | AN5034 |
| 1400 | CONTIG84 | 543832 | 544261 | 1.35 | 5.49E-02 | transcription_start_site | + | 549072 | 549072 | -5025 | 20815 | AN5034 |
| 170  | CONTIG85 | 6076   | 6425   | 2.9  | 0.00E+00 | transcription_start_site | - | 2231   | 2231   | -4019 | 20877 | AN5053 |
| 170  | CONTIG85 | 6076   | 6425   | 2.9  | 0.00E+00 | transcription_start_site | - | 5022   | 5022   | -1228 | 20878 | AN5054 |
| 170  | CONTIG85 | 6076   | 6425   | 2.9  | 0.00E+00 | transcription_start_site | - | 4345   | 4345   | -1905 | 20879 | AN5054 |
| 170  | CONTIG85 | 6076   | 6425   | 2.9  | 0.00E+00 | transcription_start_site | - | 4236   | 4236   | -2014 | 20880 | AN5054 |
| 170  | CONTIG85 | 6076   | 6425   | 2.9  | 0.00E+00 | transcription_start_site | + | 7136   | 7136   | -885  | 20881 | AN5055 |
| 170  | CONTIG85 | 6076   | 6425   | 2.9  | 0.00E+00 | transcription_start_site | + | 7368   | 7368   | -1117 | 20882 | AN5055 |
| 170  | CONTIG85 | 6076   | 6425   | 2.9  | 0.00E+00 | transcription_start_site | + | 7740   | 7740   | -1489 | 20883 | AN5055 |
| 170  | CONTIG85 | 6076   | 6425   | 2.9  | 0.00E+00 | transcription_start_site | + | 8367   | 8367   | -2116 | 20884 | AN5055 |
| 170  | CONTIG85 | 6076   | 6425   | 2.9  | 0.00E+00 | transcription_start_site | + | 11265  | 11265  | -5014 | 20885 | AN5056 |
| 170  | CONTIG85 | 6076   | 6425   | 2.9  | 0.00E+00 | transcription_start_site | + | 11345  | 11345  | -5094 | 20886 | AN5056 |
| 515  | CONTIG85 | 10821  | 11243  | 2.29 | 1.53E-03 | transcription_start_site | + | 11265  | 11265  | -233  | 20885 | AN5056 |
| 515  | CONTIG85 | 10821  | 11243  | 2.29 | 1.53E-03 | transcription_start_site | + | 11345  | 11345  | -313  | 20886 | AN5056 |
| 515  | CONTIG85 | 10821  | 11243  | 2.29 | 1.53E-03 | transcription_start_site | + | 11610  | 11610  | -578  | 20887 | AN5056 |
| 112  | CONTIG86 | 21089  | 21825  | 3.06 | 2.32E-03 | transcription_start_site | - | 17444  | 17444  | -4013 | 20922 | AN5067 |
| 112  | CONTIG86 | 21089  | 21825  | 3.06 | 2.32E-03 | transcription_start_site | - | 17300  | 17300  | -4157 | 20923 | AN5067 |
| 112  | CONTIG86 | 21089  | 21825  | 3.06 | 2.32E-03 | transcription_start_site | - | 16965  | 16965  | -4492 | 20924 | AN5067 |
| 112  | CONTIG86 | 21089  | 21825  | 3.06 | 2.32E-03 | transcription_start_site | - | 16363  | 16363  | -5094 | 20925 | AN5067 |
| 112  | CONTIG86 | 21089  | 21825  | 3.06 | 2.32E-03 | transcription_start_site | - | 16223  | 16223  | -5234 | 20926 | AN5067 |
| 112  | CONTIG86 | 21089  | 21825  | 3.06 | 2.32E-03 | transcription_start_site | + | 20945  | 20945  | 512   | 20935 | AN5068 |
| 112  | CONTIG86 | 21089  | 21825  | 3.06 | 2.32E-03 | transcription_start_site | + | 20097  | 20097  | 1360  | 20934 | AN5068 |
| 112  | CONTIG86 | 21089  | 21825  | 3.06 | 2.32E-03 | transcription_start_site | + | 22106  | 22106  | -649  | 20936 | AN5069 |
| 112  | CONTIG86 | 21089  | 21825  | 3.06 | 2.32E-03 | transcription_start_site | + | 22345  | 22345  | -888  | 20937 | AN5069 |
| 112  | CONTIG86 | 21089  | 21825  | 3.06 | 2.32E-03 | transcription_start_site | + | 22429  | 22429  | -972  | 20938 | AN5069 |
| 112  | CONTIG86 | 21089  | 21825  | 3.06 | 2.32E-03 | transcription_start_site | + | 22530  | 22530  | -1073 | 20939 | AN5069 |
| 112  | CONTIG86 | 21089  | 21825  | 3.06 | 2.32E-03 | transcription_start_site | + | 22665  | 22665  | -1208 | 20940 | AN5069 |
| 112  | CONTIG86 | 21089  | 21825  | 3.06 | 2.32E-03 | transcription_start_site | + | 23212  | 23212  | -1755 | 20941 | AN5069 |
| 613  | CONTIG86 | 28141  | 28420  | 2.18 | 2.29E-02 | transcription_start_site | + | 28527  | 28527  | -246  | 20942 | AN5070 |
| 613  | CONTIG86 | 28141  | 28420  | 2.18 | 2.29E-02 | transcription_start_site | + | 28636  | 28636  | -355  | 20943 | AN5070 |
| 613  | CONTIG86 | 28141  | 28420  | 2.18 | 2.29E-02 | transcription_start_site | + | 29675  | 29675  | -1394 | 20944 | AN5070 |
| 613  | CONTIG86 | 28141  | 28420  | 2.18 | 2.29E-02 | transcription_start_site | + | 29969  | 29969  | -1688 | 20945 | AN5070 |
| 613  | CONTIG86 | 28141  | 28420  | 2.18 | 2.29E-02 | transcription_start_site | + | 30719  | 30719  | -2438 | 20946 | AN5070 |
| 919  | CONTIG86 | 24605  | 24879  | 1.81 | 5.36E-02 | transcription_start_site | + | 28527  | 28527  | -3785 | 20942 | AN5070 |
| 919  | CONTIG86 | 24605  | 24879  | 1.81 | 5.36E-02 | transcription_start_site | + | 28636  | 28636  | -3894 | 20943 | AN5070 |
| 919  | CONTIG86 | 24605  | 24879  | 1.81 | 5.36E-02 | transcription_start_site | + | 29675  | 29675  | -4933 | 20944 | AN5070 |
| 613  | CONTIG86 | 28141  | 28420  | 2.18 | 2.29E-02 | transcription_start_site | + | 31965  | 31965  | -3684 | 20947 | AN5071 |
| 613  | CONTIG86 | 28141  | 28420  | 2.18 | 2.29E-02 | transcription_start_site | + | 32081  | 32081  | -3800 | 20948 | AN5071 |
| 613  | CONTIG86 | 28141  | 28420  | 2.18 | 2.29E-02 | transcription_start_site | + | 32708  | 32708  | -4427 | 20949 | AN5071 |
| 613  | CONTIG86 | 28141  | 28420  | 2.18 | 2.29E-02 | transcription_start_site | + | 33154  | 33154  | -4873 | 20950 | AN5071 |
| 408  | CONTIG86 | 47105  | 47614  | 2.44 | 4.92E-03 | transcription_start_site | - | 47055  | 47055  | -304  | 20969 | AN5076 |



|      |          |       |       |      |          |                          |   |       |       |       |       |        |
|------|----------|-------|-------|------|----------|--------------------------|---|-------|-------|-------|-------|--------|
| 408  | CONTIG86 | 47105 | 47614 | 2.44 | 4.92E-03 | transcription_start_site | - | 46826 | 46826 | -533  | 20970 | AN5076 |
| 408  | CONTIG86 | 47105 | 47614 | 2.44 | 4.92E-03 | transcription_start_site | - | 46671 | 46671 | -688  | 20971 | AN5076 |
| 408  | CONTIG86 | 47105 | 47614 | 2.44 | 4.92E-03 | transcription_start_site | - | 46506 | 46506 | -853  | 20972 | AN5076 |
| 408  | CONTIG86 | 47105 | 47614 | 2.44 | 4.92E-03 | transcription_start_site | - | 46223 | 46223 | -1136 | 20973 | AN5076 |
| 408  | CONTIG86 | 47105 | 47614 | 2.44 | 4.92E-03 | transcription_start_site | - | 46088 | 46088 | -1271 | 20974 | AN5076 |
| 1239 | CONTIG86 | 51685 | 51959 | 1.5  | 1.08E-01 | transcription_start_site | - | 47055 | 47055 | -4767 | 20969 | AN5076 |
| 1239 | CONTIG86 | 51685 | 51959 | 1.5  | 1.08E-01 | transcription_start_site | - | 46826 | 46826 | -4996 | 20970 | AN5076 |
| 408  | CONTIG86 | 47105 | 47614 | 2.44 | 4.92E-03 | transcription_start_site | + | 47748 | 47748 | -388  | 20975 | AN5077 |
| 408  | CONTIG86 | 47105 | 47614 | 2.44 | 4.92E-03 | transcription_start_site | + | 50158 | 50158 | -2798 | 20976 | AN5077 |
| 408  | CONTIG86 | 47105 | 47614 | 2.44 | 4.92E-03 | transcription_start_site | + | 50730 | 50730 | -3370 | 20977 | AN5077 |
| 408  | CONTIG86 | 47105 | 47614 | 2.44 | 4.92E-03 | transcription_start_site | + | 50847 | 50847 | -3487 | 20978 | AN5077 |
| 408  | CONTIG86 | 47105 | 47614 | 2.44 | 4.92E-03 | transcription_start_site | + | 51008 | 51008 | -3648 | 20979 | AN5077 |
| 408  | CONTIG86 | 47105 | 47614 | 2.44 | 4.92E-03 | transcription_start_site | + | 51848 | 51848 | -4488 | 20980 | AN5077 |
| 408  | CONTIG86 | 47105 | 47614 | 2.44 | 4.92E-03 | transcription_start_site | + | 52575 | 52575 | -5215 | 20981 | AN5077 |
| 1239 | CONTIG86 | 51685 | 51959 | 1.5  | 1.08E-01 | transcription_start_site | + | 51848 | 51848 | -26   | 20980 | AN5077 |
| 1239 | CONTIG86 | 51685 | 51959 | 1.5  | 1.08E-01 | transcription_start_site | + | 52575 | 52575 | -753  | 20981 | AN5077 |
| 1239 | CONTIG86 | 51685 | 51959 | 1.5  | 1.08E-01 | transcription_start_site | + | 51008 | 51008 | 814   | 20979 | AN5077 |
| 1239 | CONTIG86 | 51685 | 51959 | 1.5  | 1.08E-01 | transcription_start_site | + | 50847 | 50847 | 975   | 20978 | AN5077 |
| 1239 | CONTIG86 | 51685 | 51959 | 1.5  | 1.08E-01 | transcription_start_site | + | 50730 | 50730 | 1092  | 20977 | AN5077 |
| 1239 | CONTIG86 | 51685 | 51959 | 1.5  | 1.08E-01 | transcription_start_site | + | 53182 | 53182 | -1360 | 20982 | AN5077 |
| 1239 | CONTIG86 | 51685 | 51959 | 1.5  | 1.08E-01 | transcription_start_site | + | 55476 | 55476 | -3654 | 20983 | AN5078 |
| 1239 | CONTIG86 | 51685 | 51959 | 1.5  | 1.08E-01 | transcription_start_site | + | 55821 | 55821 | -3999 | 20984 | AN5078 |
| 1239 | CONTIG86 | 51685 | 51959 | 1.5  | 1.08E-01 | transcription_start_site | + | 55925 | 55925 | -4103 | 20985 | AN5078 |
| 214  | CONTIG86 | 66470 | 67029 | 2.8  | 5.08E-03 | transcription_start_site | + | 67694 | 67694 | -944  | 20991 | AN5082 |
| 214  | CONTIG86 | 66470 | 67029 | 2.8  | 5.08E-03 | transcription_start_site | + | 68163 | 68163 | -1413 | 20992 | AN5082 |
| 214  | CONTIG86 | 66470 | 67029 | 2.8  | 5.08E-03 | transcription_start_site | + | 68748 | 68748 | -1998 | 20993 | AN5082 |
| 232  | CONTIG86 | 74420 | 74766 | 2.75 | 6.24E-03 | transcription_start_site | - | 73173 | 73173 | -1420 | 20994 | AN5083 |
| 232  | CONTIG86 | 74420 | 74766 | 2.75 | 6.24E-03 | transcription_start_site | - | 72973 | 72973 | -1620 | 20995 | AN5083 |
| 232  | CONTIG86 | 74420 | 74766 | 2.75 | 6.24E-03 | transcription_start_site | - | 72824 | 72824 | -1769 | 20996 | AN5083 |
| 232  | CONTIG86 | 74420 | 74766 | 2.75 | 6.24E-03 | transcription_start_site | - | 71315 | 71315 | -3278 | 20997 | AN5083 |
| 232  | CONTIG86 | 74420 | 74766 | 2.75 | 6.24E-03 | transcription_start_site | - | 70380 | 70380 | -4213 | 20998 | AN5083 |
| 1352 | CONTIG86 | 77102 | 77451 | 1.4  | 1.38E-01 | transcription_start_site | - | 73173 | 73173 | -4103 | 20994 | AN5083 |
| 1352 | CONTIG86 | 77102 | 77451 | 1.4  | 1.38E-01 | transcription_start_site | - | 72973 | 72973 | -4303 | 20995 | AN5083 |
| 1352 | CONTIG86 | 77102 | 77451 | 1.4  | 1.38E-01 | transcription_start_site | - | 72824 | 72824 | -4452 | 20996 | AN5083 |
| 1459 | CONTIG86 | 73205 | 74159 | 1.3  | 5.91E-02 | transcription_start_site | - | 73173 | 73173 | -509  | 20994 | AN5083 |
| 1459 | CONTIG86 | 73205 | 74159 | 1.3  | 5.91E-02 | transcription_start_site | - | 72973 | 72973 | -709  | 20995 | AN5083 |
| 1459 | CONTIG86 | 73205 | 74159 | 1.3  | 5.91E-02 | transcription_start_site | - | 72824 | 72824 | -858  | 20996 | AN5083 |
| 1459 | CONTIG86 | 73205 | 74159 | 1.3  | 5.91E-02 | transcription_start_site | - | 71315 | 71315 | -2367 | 20997 | AN5083 |
| 1459 | CONTIG86 | 73205 | 74159 | 1.3  | 5.91E-02 | transcription_start_site | - | 70380 | 70380 | -3302 | 20998 | AN5083 |
| 917  | CONTIG86 | 82442 | 82948 | 1.81 | 2.66E-02 | transcription_start_site | + | 83100 | 83100 | -405  | 20999 | AN5086 |
| 1348 | CONTIG86 | 78612 | 80238 | 1.4  | 4.39E-02 | transcription_start_site | + | 83100 | 83100 | -3675 | 20999 | AN5086 |
| 1467 | CONTIG86 | 83552 | 83981 | 1.3  | 1.76E-01 | transcription_start_site | + | 83100 | 83100 | 666   | 20999 | AN5086 |
| 233  | CONTIG86 | 89252 | 89613 | 2.75 | 6.24E-03 | transcription_start_site | - | 85868 | 85868 | -3564 | 21000 | AN5087 |
| 233  | CONTIG86 | 89252 | 89613 | 2.75 | 6.24E-03 | transcription_start_site | - | 85767 | 85767 | -3665 | 21001 | AN5087 |
| 233  | CONTIG86 | 89252 | 89613 | 2.75 | 6.24E-03 | transcription_start_site | - | 85358 | 85358 | -4074 | 21002 | AN5087 |
| 811  | CONTIG86 | 88513 | 89175 | 1.92 | 4.20E-02 | transcription_start_site | - | 85868 | 85868 | -2976 | 21000 | AN5087 |
| 811  | CONTIG86 | 88513 | 89175 | 1.92 | 4.20E-02 | transcription_start_site | - | 85767 | 85767 | -3077 | 21001 | AN5087 |
| 811  | CONTIG86 | 88513 | 89175 | 1.92 | 4.20E-02 | transcription_start_site | - | 85358 | 85358 | -3486 | 21002 | AN5087 |
| 233  | CONTIG86 | 89252 | 89613 | 2.75 | 6.24E-03 | transcription_start_site | + | 90401 | 90401 | -968  | 21003 | AN5088 |
| 233  | CONTIG86 | 89252 | 89613 | 2.75 | 6.24E-03 | transcription_start_site | + | 93082 | 93082 | -3649 | 21004 | AN5088 |
| 233  | CONTIG86 | 89252 | 89613 | 2.75 | 6.24E-03 | transcription_start_site | + | 93314 | 93314 | -3881 | 21005 | AN5088 |
| 233  | CONTIG86 | 89252 | 89613 | 2.75 | 6.24E-03 | transcription_start_site | + | 93599 | 93599 | -4166 | 21006 | AN5088 |
| 233  | CONTIG86 | 89252 | 89613 | 2.75 | 6.24E-03 | transcription_start_site | + | 93842 | 93842 | -4409 | 21007 | AN5088 |
| 811  | CONTIG86 | 88513 | 89175 | 1.92 | 4.20E-02 | transcription_start_site | + | 90401 | 90401 | -1557 | 21003 | AN5088 |
| 811  | CONTIG86 | 88513 | 89175 | 1.92 | 4.20E-02 | transcription_start_site | + | 93082 | 93082 | -4238 | 21004 | AN5088 |
| 811  | CONTIG86 | 88513 | 89175 | 1.92 | 4.20E-02 | transcription_start_site | + | 93314 | 93314 | -4470 | 21005 | AN5088 |
| 811  | CONTIG86 | 88513 | 89175 | 1.92 | 4.20E-02 | transcription_start_site | + | 93599 | 93599 | -4755 | 21006 | AN5088 |

|      |          |        |        |      |          |                          |   |        |        |       |       |        |
|------|----------|--------|--------|------|----------|--------------------------|---|--------|--------|-------|-------|--------|
| 811  | CONTIG86 | 88513  | 89175  | 1.92 | 4.20E-02 | transcription_start_site | + | 93842  | 93842  | -4998 | 21007 | AN5088 |
| 1017 | CONTIG86 | 96396  | 96732  | 1.71 | 6.74E-02 | transcription_start_site | + | 96899  | 96899  | -335  | 21008 | AN5089 |
| 920  | CONTIG86 | 103745 | 104084 | 1.81 | 5.36E-02 | transcription_start_site | - | 99164  | 99164  | -4750 | 21009 | AN5090 |
| 1017 | CONTIG86 | 96396  | 96732  | 1.71 | 6.74E-02 | transcription_start_site | + | 100480 | 100480 | -3916 | 21010 | AN5091 |
| 1017 | CONTIG86 | 96396  | 96732  | 1.71 | 6.74E-02 | transcription_start_site | + | 100805 | 100805 | -4241 | 21011 | AN5091 |
| 1017 | CONTIG86 | 96396  | 96732  | 1.71 | 6.74E-02 | transcription_start_site | + | 101128 | 101128 | -4564 | 21012 | AN5091 |
| 1017 | CONTIG86 | 96396  | 96732  | 1.71 | 6.74E-02 | transcription_start_site | + | 101309 | 101309 | -4745 | 21013 | AN5091 |
| 1017 | CONTIG86 | 96396  | 96732  | 1.71 | 6.74E-02 | transcription_start_site | + | 101395 | 101395 | -4831 | 21014 | AN5091 |
| 920  | CONTIG86 | 103745 | 104084 | 1.81 | 5.36E-02 | transcription_start_site | + | 105324 | 105324 | -1409 | 21016 | AN5092 |
| 920  | CONTIG86 | 103745 | 104084 | 1.81 | 5.36E-02 | transcription_start_site | + | 105726 | 105726 | -1811 | 21017 | AN5092 |
| 920  | CONTIG86 | 103745 | 104084 | 1.81 | 5.36E-02 | transcription_start_site | + | 107242 | 107242 | -3327 | 21018 | AN5092 |
| 2369 | CONTIG87 | 2326   | 2771   | 0.44 | 1.38E-01 | transcription_start_site | + | 4535   | 4535   | -1986 | 21024 | AN5094 |
| 2369 | CONTIG87 | 2326   | 2771   | 0.44 | 1.38E-01 | transcription_start_site | + | 4738   | 4738   | -2189 | 21025 | AN5094 |
| 2374 | CONTIG87 | 3452   | 3900   | 0.41 | 1.76E-01 | transcription_start_site | + | 4535   | 4535   | -859  | 21024 | AN5094 |
| 2374 | CONTIG87 | 3452   | 3900   | 0.41 | 1.76E-01 | transcription_start_site | + | 4738   | 4738   | -1062 | 21025 | AN5094 |
| 2382 | CONTIG87 | 396    | 1405   | 0.34 | 1.64E-01 | transcription_start_site | + | 4535   | 4535   | -3634 | 21024 | AN5094 |
| 2382 | CONTIG87 | 396    | 1405   | 0.34 | 1.64E-01 | transcription_start_site | + | 4738   | 4738   | -3837 | 21025 | AN5094 |
| 2369 | CONTIG87 | 2326   | 2771   | 0.44 | 1.38E-01 | transcription_start_site | + | 6157   | 6157   | -3608 | 21026 | AN5095 |
| 2369 | CONTIG87 | 2326   | 2771   | 0.44 | 1.38E-01 | transcription_start_site | + | 6607   | 6607   | -4058 | 21027 | AN5095 |
| 2374 | CONTIG87 | 3452   | 3900   | 0.41 | 1.76E-01 | transcription_start_site | + | 6157   | 6157   | -2481 | 21026 | AN5095 |
| 2374 | CONTIG87 | 3452   | 3900   | 0.41 | 1.76E-01 | transcription_start_site | + | 6607   | 6607   | -2931 | 21027 | AN5095 |
| 2382 | CONTIG87 | 396    | 1405   | 0.34 | 1.64E-01 | transcription_start_site | + | 6157   | 6157   | -5256 | 21026 | AN5095 |
| 2188 | CONTIG88 | 6526   | 6805   | 0.81 | 1.97E-01 | transcription_start_site | + | 7403   | 7403   | -737  | 21032 | AN5098 |
| 2188 | CONTIG88 | 6526   | 6805   | 0.81 | 1.97E-01 | transcription_start_site | + | 7520   | 7520   | -854  | 21033 | AN5098 |
| 1177 | CONTIG88 | 10446  | 10775  | 1.55 | 1.37E-02 | transcription_start_site | + | 11647  | 11647  | -1036 | 21034 | AN5099 |
| 2188 | CONTIG88 | 6526   | 6805   | 0.81 | 1.97E-01 | transcription_start_site | + | 11647  | 11647  | -4981 | 21034 | AN5099 |
| 1177 | CONTIG88 | 10446  | 10775  | 1.55 | 1.37E-02 | transcription_start_site | + | 13986  | 13986  | -3375 | 21035 | AN5100 |
| 1177 | CONTIG88 | 10446  | 10775  | 1.55 | 1.37E-02 | transcription_start_site | + | 14138  | 14138  | -3527 | 21036 | AN5100 |
| 1177 | CONTIG88 | 10446  | 10775  | 1.55 | 1.37E-02 | transcription_start_site | + | 14229  | 14229  | -3618 | 21037 | AN5100 |
| 1177 | CONTIG88 | 10446  | 10775  | 1.55 | 1.37E-02 | transcription_start_site | + | 14385  | 14385  | -3774 | 21038 | AN5100 |
| 1177 | CONTIG88 | 10446  | 10775  | 1.55 | 1.37E-02 | transcription_start_site | + | 15149  | 15149  | -4538 | 21039 | AN5100 |
| 1177 | CONTIG88 | 10446  | 10775  | 1.55 | 1.37E-02 | transcription_start_site | + | 15404  | 15404  | -4793 | 21040 | AN5100 |
| 660  | CONTIG88 | 23476  | 23920  | 2.09 | 1.45E-03 | transcription_start_site | - | 20864  | 20864  | -2834 | 21043 | AN5102 |
| 660  | CONTIG88 | 23476  | 23920  | 2.09 | 1.45E-03 | transcription_start_site | - | 20634  | 20634  | -3064 | 21044 | AN5102 |
| 660  | CONTIG88 | 23476  | 23920  | 2.09 | 1.45E-03 | transcription_start_site | - | 20489  | 20489  | -3209 | 21045 | AN5102 |
| 660  | CONTIG88 | 23476  | 23920  | 2.09 | 1.45E-03 | transcription_start_site | - | 20284  | 20284  | -3414 | 21046 | AN5102 |
| 660  | CONTIG88 | 23476  | 23920  | 2.09 | 1.45E-03 | transcription_start_site | - | 20078  | 20078  | -3620 | 21047 | AN5102 |
| 660  | CONTIG88 | 23476  | 23920  | 2.09 | 1.45E-03 | transcription_start_site | - | 18597  | 18597  | -5101 | 21048 | AN5102 |
| 660  | CONTIG88 | 23476  | 23920  | 2.09 | 1.45E-03 | transcription_start_site | + | 24966  | 24966  | -1268 | 21054 | AN5104 |
| 660  | CONTIG88 | 23476  | 23920  | 2.09 | 1.45E-03 | transcription_start_site | + | 25079  | 25079  | -1381 | 21055 | AN5104 |
| 660  | CONTIG88 | 23476  | 23920  | 2.09 | 1.45E-03 | transcription_start_site | + | 25220  | 25220  | -1522 | 21056 | AN5104 |
| 660  | CONTIG88 | 23476  | 23920  | 2.09 | 1.45E-03 | transcription_start_site | + | 25575  | 25575  | -1877 | 21057 | AN5104 |
| 660  | CONTIG88 | 23476  | 23920  | 2.09 | 1.45E-03 | transcription_start_site | + | 25839  | 25839  | -2141 | 21058 | AN5104 |
| 660  | CONTIG88 | 23476  | 23920  | 2.09 | 1.45E-03 | transcription_start_site | + | 26599  | 26599  | -2901 | 21059 | AN5104 |
| 660  | CONTIG88 | 23476  | 23920  | 2.09 | 1.45E-03 | transcription_start_site | + | 27951  | 27951  | -4253 | 21060 | AN5105 |
| 660  | CONTIG88 | 23476  | 23920  | 2.09 | 1.45E-03 | transcription_start_site | + | 28162  | 28162  | -4464 | 21061 | AN5105 |
| 660  | CONTIG88 | 23476  | 23920  | 2.09 | 1.45E-03 | transcription_start_site | + | 28349  | 28349  | -4651 | 21062 | AN5105 |
| 933  | CONTIG88 | 65101  | 65681  | 1.79 | 2.49E-03 | transcription_start_site | + | 65264  | 65264  | 127   | 21104 | AN5117 |
| 933  | CONTIG88 | 65101  | 65681  | 1.79 | 2.49E-03 | transcription_start_site | + | 65082  | 65082  | 309   | 21103 | AN5117 |
| 933  | CONTIG88 | 65101  | 65681  | 1.79 | 2.49E-03 | transcription_start_site | + | 64761  | 64761  | 630   | 21102 | AN5117 |
| 933  | CONTIG88 | 65101  | 65681  | 1.79 | 2.49E-03 | transcription_start_site | + | 64485  | 64485  | 906   | 21101 | AN5117 |
| 1204 | CONTIG88 | 63696  | 64120  | 1.52 | 1.54E-02 | transcription_start_site | + | 64485  | 64485  | -577  | 21101 | AN5117 |
| 1204 | CONTIG88 | 63696  | 64120  | 1.52 | 1.54E-02 | transcription_start_site | + | 64761  | 64761  | -853  | 21102 | AN5117 |
| 1204 | CONTIG88 | 63696  | 64120  | 1.52 | 1.54E-02 | transcription_start_site | + | 65082  | 65082  | -1174 | 21103 | AN5117 |
| 1204 | CONTIG88 | 63696  | 64120  | 1.52 | 1.54E-02 | transcription_start_site | + | 65264  | 65264  | -1356 | 21104 | AN5117 |
| 933  | CONTIG88 | 65101  | 65681  | 1.79 | 2.49E-03 | transcription_start_site | + | 66073  | 66073  | -682  | 21105 | AN5118 |
| 933  | CONTIG88 | 65101  | 65681  | 1.79 | 2.49E-03 | transcription_start_site | + | 66707  | 66707  | -1316 | 21106 | AN5118 |

|      |          |        |        |      |          |                          |   |        |        |       |       |        |
|------|----------|--------|--------|------|----------|--------------------------|---|--------|--------|-------|-------|--------|
| 933  | CONTIG88 | 65101  | 65681  | 1.79 | 2.49E-03 | transcription_start_site | + | 66959  | 66959  | -1568 | 21107 | AN5118 |
| 1204 | CONTIG88 | 63696  | 64120  | 1.52 | 1.54E-02 | transcription_start_site | + | 66073  | 66073  | -2165 | 21105 | AN5118 |
| 1204 | CONTIG88 | 63696  | 64120  | 1.52 | 1.54E-02 | transcription_start_site | + | 66707  | 66707  | -2799 | 21106 | AN5118 |
| 1204 | CONTIG88 | 63696  | 64120  | 1.52 | 1.54E-02 | transcription_start_site | + | 66959  | 66959  | -3051 | 21107 | AN5118 |
| 933  | CONTIG88 | 65101  | 65681  | 1.79 | 2.49E-03 | transcription_start_site | + | 69593  | 69593  | -4202 | 21112 | AN5120 |
| 933  | CONTIG88 | 65101  | 65681  | 1.79 | 2.49E-03 | transcription_start_site | + | 70118  | 70118  | -4727 | 21113 | AN5120 |
| 1364 | CONTIG88 | 87389  | 87653  | 1.38 | 2.63E-02 | transcription_start_site | - | 85842  | 85842  | -1679 | 21138 | AN5127 |
| 1364 | CONTIG88 | 87389  | 87653  | 1.38 | 2.63E-02 | transcription_start_site | - | 85778  | 85778  | -1743 | 21139 | AN5127 |
| 1364 | CONTIG88 | 87389  | 87653  | 1.38 | 2.63E-02 | transcription_start_site | - | 85502  | 85502  | -2019 | 21140 | AN5127 |
| 1364 | CONTIG88 | 87389  | 87653  | 1.38 | 2.63E-02 | transcription_start_site | - | 85330  | 85330  | -2191 | 21141 | AN5127 |
| 1364 | CONTIG88 | 87389  | 87653  | 1.38 | 2.63E-02 | transcription_start_site | - | 86796  | 86796  | -725  | 21142 | AN5128 |
| 1364 | CONTIG88 | 87389  | 87653  | 1.38 | 2.63E-02 | transcription_start_site | - | 86576  | 86576  | -945  | 21143 | AN5128 |
| 1364 | CONTIG88 | 87389  | 87653  | 1.38 | 2.63E-02 | transcription_start_site | - | 86509  | 86509  | -1012 | 21144 | AN5128 |
| 1364 | CONTIG88 | 87389  | 87653  | 1.38 | 2.63E-02 | transcription_start_site | + | 88164  | 88164  | -643  | 21145 | AN5129 |
| 2181 | CONTIG88 | 93154  | 93593  | 0.81 | 1.34E-01 | transcription_start_site | - | 93163  | 93163  | -210  | 21146 | AN5130 |
| 2181 | CONTIG88 | 93154  | 93593  | 0.81 | 1.34E-01 | transcription_start_site | - | 92850  | 92850  | -523  | 21147 | AN5130 |
| 2181 | CONTIG88 | 93154  | 93593  | 0.81 | 1.34E-01 | transcription_start_site | + | 93965  | 93965  | -591  | 21148 | AN5131 |
| 2181 | CONTIG88 | 93154  | 93593  | 0.81 | 1.34E-01 | transcription_start_site | + | 94189  | 94189  | -815  | 21149 | AN5131 |
| 2181 | CONTIG88 | 93154  | 93593  | 0.81 | 1.34E-01 | transcription_start_site | + | 94475  | 94475  | -1101 | 21150 | AN5131 |
| 2181 | CONTIG88 | 93154  | 93593  | 0.81 | 1.34E-01 | transcription_start_site | + | 95256  | 95256  | -1882 | 21151 | AN5132 |
| 2181 | CONTIG88 | 93154  | 93593  | 0.81 | 1.34E-01 | transcription_start_site | + | 95395  | 95395  | -2021 | 21152 | AN5132 |
| 2181 | CONTIG88 | 93154  | 93593  | 0.81 | 1.34E-01 | transcription_start_site | + | 95486  | 95486  | -2112 | 21153 | AN5132 |
| 2181 | CONTIG88 | 93154  | 93593  | 0.81 | 1.34E-01 | transcription_start_site | + | 95587  | 95587  | -2213 | 21154 | AN5132 |
| 2181 | CONTIG88 | 93154  | 93593  | 0.81 | 1.34E-01 | transcription_start_site | + | 95755  | 95755  | -2381 | 21155 | AN5132 |
| 2181 | CONTIG88 | 93154  | 93593  | 0.81 | 1.34E-01 | transcription_start_site | + | 96113  | 96113  | -2739 | 21156 | AN5132 |
| 272  | CONTIG88 | 103066 | 103490 | 2.67 | 0.00E+00 | transcription_start_site | - | 98456  | 98456  | -4822 | 21157 | AN5133 |
| 272  | CONTIG88 | 103066 | 103490 | 2.67 | 0.00E+00 | transcription_start_site | - | 98373  | 98373  | -4905 | 21158 | AN5133 |
| 782  | CONTIG88 | 100667 | 101465 | 1.96 | 0.00E+00 | transcription_start_site | - | 98456  | 98456  | -2610 | 21157 | AN5133 |
| 782  | CONTIG88 | 100667 | 101465 | 1.96 | 0.00E+00 | transcription_start_site | - | 98373  | 98373  | -2693 | 21158 | AN5133 |
| 873  | CONTIG88 | 99765  | 100044 | 1.86 | 4.57E-03 | transcription_start_site | - | 98456  | 98456  | -1448 | 21157 | AN5133 |
| 873  | CONTIG88 | 99765  | 100044 | 1.86 | 4.57E-03 | transcription_start_site | - | 98373  | 98373  | -1531 | 21158 | AN5133 |
| 272  | CONTIG88 | 103066 | 103490 | 2.67 | 0.00E+00 | transcription_start_site | + | 104045 | 104045 | -767  | 21159 | AN5134 |
| 272  | CONTIG88 | 103066 | 103490 | 2.67 | 0.00E+00 | transcription_start_site | + | 104285 | 104285 | -1007 | 21160 | AN5134 |
| 272  | CONTIG88 | 103066 | 103490 | 2.67 | 0.00E+00 | transcription_start_site | + | 104384 | 104384 | -1106 | 21161 | AN5134 |
| 272  | CONTIG88 | 103066 | 103490 | 2.67 | 0.00E+00 | transcription_start_site | + | 107783 | 107783 | -4505 | 21162 | AN5134 |
| 272  | CONTIG88 | 103066 | 103490 | 2.67 | 0.00E+00 | transcription_start_site | + | 107870 | 107870 | -4592 | 21163 | AN5134 |
| 782  | CONTIG88 | 100667 | 101465 | 1.96 | 0.00E+00 | transcription_start_site | + | 104045 | 104045 | -2979 | 21159 | AN5134 |
| 782  | CONTIG88 | 100667 | 101465 | 1.96 | 0.00E+00 | transcription_start_site | + | 104285 | 104285 | -3219 | 21160 | AN5134 |
| 782  | CONTIG88 | 100667 | 101465 | 1.96 | 0.00E+00 | transcription_start_site | + | 104384 | 104384 | -3318 | 21161 | AN5134 |
| 873  | CONTIG88 | 99765  | 100044 | 1.86 | 4.57E-03 | transcription_start_site | + | 104045 | 104045 | -4140 | 21159 | AN5134 |
| 873  | CONTIG88 | 99765  | 100044 | 1.86 | 4.57E-03 | transcription_start_site | + | 104285 | 104285 | -4380 | 21160 | AN5134 |
| 873  | CONTIG88 | 99765  | 100044 | 1.86 | 4.57E-03 | transcription_start_site | + | 104384 | 104384 | -4479 | 21161 | AN5134 |
| 1584 | CONTIG88 | 113476 | 113900 | 1.21 | 2.30E-02 | transcription_start_site | - | 112272 | 112272 | -1416 | 21164 | AN5135 |
| 1584 | CONTIG88 | 113476 | 113900 | 1.21 | 2.30E-02 | transcription_start_site | - | 113464 | 113464 | -224  | 21165 | AN5136 |
| 1584 | CONTIG88 | 113476 | 113900 | 1.21 | 2.30E-02 | transcription_start_site | + | 118738 | 118738 | -5050 | 21166 | AN5138 |
| 1787 | CONTIG88 | 131851 | 132290 | 1.08 | 7.66E-02 | transcription_start_site | - | 126884 | 126884 | -5186 | 21169 | AN5140 |
| 1787 | CONTIG88 | 131851 | 132290 | 1.08 | 7.66E-02 | transcription_start_site | - | 129320 | 129320 | -2750 | 21171 | AN5141 |
| 1787 | CONTIG88 | 131851 | 132290 | 1.08 | 7.66E-02 | transcription_start_site | - | 129108 | 129108 | -2962 | 21172 | AN5141 |
| 1787 | CONTIG88 | 131851 | 132290 | 1.08 | 7.66E-02 | transcription_start_site | - | 129029 | 129029 | -3041 | 21173 | AN5141 |
| 1787 | CONTIG88 | 131851 | 132290 | 1.08 | 7.66E-02 | transcription_start_site | - | 128438 | 128438 | -3632 | 21174 | AN5141 |
| 874  | CONTIG88 | 139581 | 139935 | 1.86 | 4.57E-03 | transcription_start_site | - | 139114 | 139114 | -644  | 21175 | AN5144 |
| 874  | CONTIG88 | 139581 | 139935 | 1.86 | 4.57E-03 | transcription_start_site | - | 138555 | 138555 | -1203 | 21176 | AN5144 |
| 1891 | CONTIG88 | 141236 | 141655 | 1.01 | 9.60E-02 | transcription_start_site | - | 139114 | 139114 | -2331 | 21175 | AN5144 |
| 1891 | CONTIG88 | 141236 | 141655 | 1.01 | 9.60E-02 | transcription_start_site | - | 138555 | 138555 | -2890 | 21176 | AN5144 |
| 874  | CONTIG88 | 139581 | 139935 | 1.86 | 4.57E-03 | transcription_start_site | - | 140833 | 140833 | 1075  | 21178 | AN5145 |
| 1891 | CONTIG88 | 141236 | 141655 | 1.01 | 9.60E-02 | transcription_start_site | - | 140945 | 140945 | -500  | 21177 | AN5145 |
| 1891 | CONTIG88 | 141236 | 141655 | 1.01 | 9.60E-02 | transcription_start_site | - | 140833 | 140833 | -612  | 21178 | AN5145 |

|      |          |        |        |      |          |                          |   |        |        |       |       |        |
|------|----------|--------|--------|------|----------|--------------------------|---|--------|--------|-------|-------|--------|
| 874  | CONTIG88 | 139581 | 139935 | 1.86 | 4.57E-03 | transcription_start_site | + | 141707 | 141707 | -1949 | 21179 | AN5146 |
| 874  | CONTIG88 | 139581 | 139935 | 1.86 | 4.57E-03 | transcription_start_site | + | 141788 | 141788 | -2030 | 21180 | AN5146 |
| 874  | CONTIG88 | 139581 | 139935 | 1.86 | 4.57E-03 | transcription_start_site | + | 141904 | 141904 | -2146 | 21181 | AN5146 |
| 874  | CONTIG88 | 139581 | 139935 | 1.86 | 4.57E-03 | transcription_start_site | + | 143145 | 143145 | -3387 | 21182 | AN5146 |
| 874  | CONTIG88 | 139581 | 139935 | 1.86 | 4.57E-03 | transcription_start_site | + | 143270 | 143270 | -3512 | 21183 | AN5146 |
| 1891 | CONTIG88 | 141236 | 141655 | 1.01 | 9.60E-02 | transcription_start_site | + | 141707 | 141707 | -261  | 21179 | AN5146 |
| 1891 | CONTIG88 | 141236 | 141655 | 1.01 | 9.60E-02 | transcription_start_site | + | 141788 | 141788 | -342  | 21180 | AN5146 |
| 1891 | CONTIG88 | 141236 | 141655 | 1.01 | 9.60E-02 | transcription_start_site | + | 141904 | 141904 | -458  | 21181 | AN5146 |
| 1891 | CONTIG88 | 141236 | 141655 | 1.01 | 9.60E-02 | transcription_start_site | + | 143145 | 143145 | -1699 | 21182 | AN5146 |
| 1891 | CONTIG88 | 141236 | 141655 | 1.01 | 9.60E-02 | transcription_start_site | + | 143270 | 143270 | -1824 | 21183 | AN5146 |
| 618  | CONTIG88 | 159244 | 159593 | 2.16 | 8.43E-04 | transcription_start_site | + | 160062 | 160062 | -643  | 21191 | AN5152 |
| 618  | CONTIG88 | 159244 | 159593 | 2.16 | 8.43E-04 | transcription_start_site | + | 160165 | 160165 | -746  | 21192 | AN5152 |
| 618  | CONTIG88 | 159244 | 159593 | 2.16 | 8.43E-04 | transcription_start_site | + | 160273 | 160273 | -854  | 21193 | AN5152 |
| 618  | CONTIG88 | 159244 | 159593 | 2.16 | 8.43E-04 | transcription_start_site | + | 160417 | 160417 | -998  | 21194 | AN5152 |
| 618  | CONTIG88 | 159244 | 159593 | 2.16 | 8.43E-04 | transcription_start_site | + | 160558 | 160558 | -1139 | 21195 | AN5152 |
| 618  | CONTIG88 | 159244 | 159593 | 2.16 | 8.43E-04 | transcription_start_site | + | 160702 | 160702 | -1283 | 21196 | AN5152 |
| 618  | CONTIG88 | 159244 | 159593 | 2.16 | 8.43E-04 | transcription_start_site | + | 161089 | 161089 | -1670 | 21197 | AN5152 |
| 618  | CONTIG88 | 159244 | 159593 | 2.16 | 8.43E-04 | transcription_start_site | + | 163524 | 163524 | -4105 | 21200 | AN5154 |
| 370  | CONTIG88 | 172355 | 172629 | 2.5  | 0.00E+00 | transcription_start_site | - | 170208 | 170208 | -2284 | 21203 | AN5155 |
| 370  | CONTIG88 | 172355 | 172629 | 2.5  | 0.00E+00 | transcription_start_site | - | 170059 | 170059 | -2433 | 21204 | AN5155 |
| 370  | CONTIG88 | 172355 | 172629 | 2.5  | 0.00E+00 | transcription_start_site | - | 169952 | 169952 | -2540 | 21205 | AN5155 |
| 370  | CONTIG88 | 172355 | 172629 | 2.5  | 0.00E+00 | transcription_start_site | - | 172010 | 172010 | -482  | 21206 | AN5156 |
| 370  | CONTIG88 | 172355 | 172629 | 2.5  | 0.00E+00 | transcription_start_site | + | 173224 | 173224 | -732  | 21207 | AN5157 |
| 370  | CONTIG88 | 172355 | 172629 | 2.5  | 0.00E+00 | transcription_start_site | + | 173573 | 173573 | -1081 | 21208 | AN5157 |
| 370  | CONTIG88 | 172355 | 172629 | 2.5  | 0.00E+00 | transcription_start_site | + | 175319 | 175319 | -2827 | 21209 | AN5157 |
| 2073 | CONTIG89 | 15845  | 16329  | 0.9  | 1.38E-01 | transcription_start_site | + | 16072  | 16072  | 15    | 21225 | AN5162 |
| 2073 | CONTIG89 | 15845  | 16329  | 0.9  | 1.38E-01 | transcription_start_site | + | 16268  | 16268  | -181  | 21226 | AN5162 |
| 2073 | CONTIG89 | 15845  | 16329  | 0.9  | 1.38E-01 | transcription_start_site | + | 16467  | 16467  | -380  | 21227 | AN5162 |
| 2073 | CONTIG89 | 15845  | 16329  | 0.9  | 1.38E-01 | transcription_start_site | + | 16974  | 16974  | -887  | 21228 | AN5162 |
| 729  | CONTIG89 | 32492  | 32751  | 2.01 | 1.77E-03 | transcription_start_site | + | 33967  | 33967  | -1345 | 21239 | AN5167 |
| 729  | CONTIG89 | 32492  | 32751  | 2.01 | 1.77E-03 | transcription_start_site | + | 34437  | 34437  | -1815 | 21240 | AN5167 |
| 729  | CONTIG89 | 32492  | 32751  | 2.01 | 1.77E-03 | transcription_start_site | + | 35752  | 35752  | -3130 | 21241 | AN5167 |
| 729  | CONTIG89 | 32492  | 32751  | 2.01 | 1.77E-03 | transcription_start_site | + | 36770  | 36770  | -4148 | 21242 | AN5167 |
| 1591 | CONTIG89 | 48395  | 48669  | 1.21 | 4.78E-02 | transcription_start_site | - | 43680  | 43680  | -4852 | 21243 | AN5168 |
| 1218 | CONTIG89 | 50415  | 50769  | 1.51 | 1.54E-02 | transcription_start_site | - | 47954  | 47954  | -2638 | 21249 | AN5169 |
| 1218 | CONTIG89 | 50415  | 50769  | 1.51 | 1.54E-02 | transcription_start_site | - | 47903  | 47903  | -2689 | 21250 | AN5169 |
| 1218 | CONTIG89 | 50415  | 50769  | 1.51 | 1.54E-02 | transcription_start_site | - | 47648  | 47648  | -2944 | 21251 | AN5169 |
| 1591 | CONTIG89 | 48395  | 48669  | 1.21 | 4.78E-02 | transcription_start_site | - | 47954  | 47954  | -578  | 21249 | AN5169 |
| 1591 | CONTIG89 | 48395  | 48669  | 1.21 | 4.78E-02 | transcription_start_site | - | 47903  | 47903  | -629  | 21250 | AN5169 |
| 1591 | CONTIG89 | 48395  | 48669  | 1.21 | 4.78E-02 | transcription_start_site | - | 47648  | 47648  | -884  | 21251 | AN5169 |
| 1218 | CONTIG89 | 50415  | 50769  | 1.51 | 1.54E-02 | transcription_start_site | + | 51651  | 51651  | -1059 | 21252 | AN5170 |
| 1218 | CONTIG89 | 50415  | 50769  | 1.51 | 1.54E-02 | transcription_start_site | + | 51878  | 51878  | -1286 | 21253 | AN5170 |
| 1218 | CONTIG89 | 50415  | 50769  | 1.51 | 1.54E-02 | transcription_start_site | + | 52124  | 52124  | -1532 | 21254 | AN5170 |
| 1591 | CONTIG89 | 48395  | 48669  | 1.21 | 4.78E-02 | transcription_start_site | + | 51651  | 51651  | -3119 | 21252 | AN5170 |
| 1591 | CONTIG89 | 48395  | 48669  | 1.21 | 4.78E-02 | transcription_start_site | + | 51878  | 51878  | -3346 | 21253 | AN5170 |
| 1591 | CONTIG89 | 48395  | 48669  | 1.21 | 4.78E-02 | transcription_start_site | + | 52124  | 52124  | -3592 | 21254 | AN5170 |
| 1218 | CONTIG89 | 50415  | 50769  | 1.51 | 1.54E-02 | transcription_start_site | + | 55454  | 55454  | -4862 | 21255 | AN5171 |
| 1218 | CONTIG89 | 50415  | 50769  | 1.51 | 1.54E-02 | transcription_start_site | + | 55637  | 55637  | -5045 | 21256 | AN5171 |
| 1004 | CONTIG89 | 104551 | 104975 | 1.71 | 7.70E-03 | transcription_start_site | - | 104539 | 104539 | -224  | 21297 | AN5187 |
| 1004 | CONTIG89 | 104551 | 104975 | 1.71 | 7.70E-03 | transcription_start_site | - | 104373 | 104373 | -390  | 21298 | AN5187 |
| 1004 | CONTIG89 | 104551 | 104975 | 1.71 | 7.70E-03 | transcription_start_site | - | 103651 | 103651 | -1112 | 21299 | AN5187 |
| 1004 | CONTIG89 | 104551 | 104975 | 1.71 | 7.70E-03 | transcription_start_site | - | 103567 | 103567 | -1196 | 21300 | AN5187 |
| 1004 | CONTIG89 | 104551 | 104975 | 1.71 | 7.70E-03 | transcription_start_site | - | 102589 | 102589 | -2174 | 21301 | AN5187 |
| 1004 | CONTIG89 | 104551 | 104975 | 1.71 | 7.70E-03 | transcription_start_site | - | 102443 | 102443 | -2320 | 21302 | AN5187 |
| 1004 | CONTIG89 | 104551 | 104975 | 1.71 | 7.70E-03 | transcription_start_site | - | 104996 | 104996 | 233   | 21306 | AN5188 |
| 1004 | CONTIG89 | 104551 | 104975 | 1.71 | 7.70E-03 | transcription_start_site | - | 105474 | 105474 | 711   | 21305 | AN5188 |
| 1004 | CONTIG89 | 104551 | 104975 | 1.71 | 7.70E-03 | transcription_start_site | + | 107983 | 107983 | -3220 | 21307 | AN5189 |

|      |          |        |        |      |          |                          |   |        |        |       |       |        |
|------|----------|--------|--------|------|----------|--------------------------|---|--------|--------|-------|-------|--------|
| 1004 | CONTIG89 | 104551 | 104975 | 1.71 | 7.70E-03 | transcription_start_site | + | 108649 | 108649 | -3886 | 21308 | AN5189 |
| 1004 | CONTIG89 | 104551 | 104975 | 1.71 | 7.70E-03 | transcription_start_site | + | 108947 | 108947 | -4184 | 21309 | AN5189 |
| 889  | CONTIG89 | 119183 | 119532 | 1.84 | 4.57E-03 | transcription_start_site | - | 114482 | 114482 | -4875 | 21313 | AN5191 |
| 889  | CONTIG89 | 119183 | 119532 | 1.84 | 4.57E-03 | transcription_start_site | - | 117344 | 117344 | -2013 | 21315 | AN5192 |
| 889  | CONTIG89 | 119183 | 119532 | 1.84 | 4.57E-03 | transcription_start_site | - | 116849 | 116849 | -2508 | 21316 | AN5192 |
| 889  | CONTIG89 | 119183 | 119532 | 1.84 | 4.57E-03 | transcription_start_site | - | 116772 | 116772 | -2585 | 21317 | AN5192 |
| 889  | CONTIG89 | 119183 | 119532 | 1.84 | 4.57E-03 | transcription_start_site | - | 115940 | 115940 | -3417 | 21318 | AN5192 |
| 889  | CONTIG89 | 119183 | 119532 | 1.84 | 4.57E-03 | transcription_start_site | - | 119065 | 119065 | -292  | 21319 | AN5193 |
| 889  | CONTIG89 | 119183 | 119532 | 1.84 | 4.57E-03 | transcription_start_site | - | 118972 | 118972 | -385  | 21320 | AN5193 |
| 889  | CONTIG89 | 119183 | 119532 | 1.84 | 4.57E-03 | transcription_start_site | - | 118456 | 118456 | -901  | 21321 | AN5193 |
| 889  | CONTIG89 | 119183 | 119532 | 1.84 | 4.57E-03 | transcription_start_site | + | 120088 | 120088 | -730  | 21322 | AN5194 |
| 889  | CONTIG89 | 119183 | 119532 | 1.84 | 4.57E-03 | transcription_start_site | + | 121400 | 121400 | -2042 | 21323 | AN5194 |
| 889  | CONTIG89 | 119183 | 119532 | 1.84 | 4.57E-03 | transcription_start_site | + | 122847 | 122847 | -3489 | 21324 | AN5194 |
| 889  | CONTIG89 | 119183 | 119532 | 1.84 | 4.57E-03 | transcription_start_site | + | 123662 | 123662 | -4304 | 21325 | AN5195 |
| 889  | CONTIG89 | 119183 | 119532 | 1.84 | 4.57E-03 | transcription_start_site | + | 123869 | 123869 | -4511 | 21326 | AN5195 |
| 889  | CONTIG89 | 119183 | 119532 | 1.84 | 4.57E-03 | transcription_start_site | + | 124101 | 124101 | -4743 | 21327 | AN5195 |
| 889  | CONTIG89 | 119183 | 119532 | 1.84 | 4.57E-03 | transcription_start_site | + | 124229 | 124229 | -4871 | 21328 | AN5195 |
| 2149 | CONTIG89 | 134254 | 135059 | 0.84 | 1.76E-01 | transcription_start_site | - | 130382 | 130382 | -4274 | 21332 | AN5197 |
| 2149 | CONTIG89 | 134254 | 135059 | 0.84 | 1.76E-01 | transcription_start_site | - | 132614 | 132614 | -2042 | 21333 | AN5198 |
| 2149 | CONTIG89 | 134254 | 135059 | 0.84 | 1.76E-01 | transcription_start_site | - | 132371 | 132371 | -2285 | 21334 | AN5198 |
| 2149 | CONTIG89 | 134254 | 135059 | 0.84 | 1.76E-01 | transcription_start_site | - | 132057 | 132057 | -2599 | 21335 | AN5198 |
| 2149 | CONTIG89 | 134254 | 135059 | 0.84 | 1.76E-01 | transcription_start_site | - | 131858 | 131858 | -2798 | 21336 | AN5198 |
| 2149 | CONTIG89 | 134254 | 135059 | 0.84 | 1.76E-01 | transcription_start_site | - | 131778 | 131778 | -2878 | 21337 | AN5198 |
| 2149 | CONTIG89 | 134254 | 135059 | 0.84 | 1.76E-01 | transcription_start_site | - | 131041 | 131041 | -3615 | 21338 | AN5198 |
| 2149 | CONTIG89 | 134254 | 135059 | 0.84 | 1.76E-01 | transcription_start_site | - | 134381 | 134381 | -275  | 21339 | AN5199 |
| 2149 | CONTIG89 | 134254 | 135059 | 0.84 | 1.76E-01 | transcription_start_site | - | 134174 | 134174 | -482  | 21340 | AN5199 |
| 2149 | CONTIG89 | 134254 | 135059 | 0.84 | 1.76E-01 | transcription_start_site | - | 133711 | 133711 | -945  | 21341 | AN5199 |
| 2149 | CONTIG89 | 134254 | 135059 | 0.84 | 1.76E-01 | transcription_start_site | + | 134802 | 134802 | -145  | 21342 | AN5200 |
| 2149 | CONTIG89 | 134254 | 135059 | 0.84 | 1.76E-01 | transcription_start_site | + | 135084 | 135084 | -427  | 21343 | AN5200 |
| 2149 | CONTIG89 | 134254 | 135059 | 0.84 | 1.76E-01 | transcription_start_site | + | 135354 | 135354 | -697  | 21344 | AN5200 |
| 1101 | CONTIG89 | 155645 | 156144 | 1.61 | 1.06E-02 | transcription_start_site | - | 155884 | 155884 | -10   | 21360 | AN5207 |
| 1101 | CONTIG89 | 155645 | 156144 | 1.61 | 1.06E-02 | transcription_start_site | - | 155654 | 155654 | -240  | 21361 | AN5207 |
| 1101 | CONTIG89 | 155645 | 156144 | 1.61 | 1.06E-02 | transcription_start_site | - | 155056 | 155056 | -838  | 21362 | AN5207 |
| 2143 | CONTIG89 | 162460 | 163184 | 0.84 | 9.04E-02 | transcription_start_site | - | 159140 | 159140 | -3682 | 21363 | AN5208 |
| 2143 | CONTIG89 | 162460 | 163184 | 0.84 | 9.04E-02 | transcription_start_site | - | 158817 | 158817 | -4005 | 21364 | AN5208 |
| 1101 | CONTIG89 | 155645 | 156144 | 1.61 | 1.06E-02 | transcription_start_site | + | 159729 | 159729 | -3834 | 21365 | AN5209 |
| 1101 | CONTIG89 | 155645 | 156144 | 1.61 | 1.06E-02 | transcription_start_site | + | 161028 | 161028 | -5133 | 21366 | AN5209 |
| 2143 | CONTIG89 | 162460 | 163184 | 0.84 | 9.04E-02 | transcription_start_site | + | 163364 | 163364 | -542  | 21367 | AN5210 |
| 2143 | CONTIG89 | 162460 | 163184 | 0.84 | 9.04E-02 | transcription_start_site | + | 163560 | 163560 | -738  | 21368 | AN5210 |
| 2143 | CONTIG89 | 162460 | 163184 | 0.84 | 9.04E-02 | transcription_start_site | + | 163656 | 163656 | -834  | 21369 | AN5210 |
| 2143 | CONTIG89 | 162460 | 163184 | 0.84 | 9.04E-02 | transcription_start_site | + | 163761 | 163761 | -939  | 21370 | AN5210 |
| 2143 | CONTIG89 | 162460 | 163184 | 0.84 | 9.04E-02 | transcription_start_site | + | 163894 | 163894 | -1072 | 21371 | AN5210 |
| 2143 | CONTIG89 | 162460 | 163184 | 0.84 | 9.04E-02 | transcription_start_site | + | 164071 | 164071 | -1249 | 21372 | AN5210 |
| 2143 | CONTIG89 | 162460 | 163184 | 0.84 | 9.04E-02 | transcription_start_site | + | 164955 | 164955 | -2133 | 21373 | AN5210 |
| 2143 | CONTIG89 | 162460 | 163184 | 0.84 | 9.04E-02 | transcription_start_site | + | 165086 | 165086 | -2264 | 21374 | AN5210 |
| 709  | CONTIG89 | 181518 | 181780 | 2.04 | 1.62E-03 | transcription_start_site | - | 181089 | 181089 | -560  | 21381 | AN5213 |
| 709  | CONTIG89 | 181518 | 181780 | 2.04 | 1.62E-03 | transcription_start_site | - | 180895 | 180895 | -754  | 21382 | AN5213 |
| 710  | CONTIG89 | 193128 | 193477 | 2.04 | 1.62E-03 | transcription_start_site | - | 189010 | 189010 | -4292 | 21389 | AN5215 |
| 710  | CONTIG89 | 193128 | 193477 | 2.04 | 1.62E-03 | transcription_start_site | - | 188947 | 188947 | -4355 | 21390 | AN5215 |
| 710  | CONTIG89 | 193128 | 193477 | 2.04 | 1.62E-03 | transcription_start_site | + | 193766 | 193766 | -463  | 21392 | AN5217 |
| 710  | CONTIG89 | 193128 | 193477 | 2.04 | 1.62E-03 | transcription_start_site | + | 193937 | 193937 | -634  | 21393 | AN5217 |
| 710  | CONTIG89 | 193128 | 193477 | 2.04 | 1.62E-03 | transcription_start_site | + | 194119 | 194119 | -816  | 21394 | AN5217 |
| 710  | CONTIG89 | 193128 | 193477 | 2.04 | 1.62E-03 | transcription_start_site | + | 194350 | 194350 | -1047 | 21395 | AN5217 |
| 1592 | CONTIG89 | 200861 | 201135 | 1.21 | 4.78E-02 | transcription_start_site | - | 200058 | 200058 | -940  | 21396 | AN5218 |
| 1592 | CONTIG89 | 200861 | 201135 | 1.21 | 4.78E-02 | transcription_start_site | - | 199217 | 199217 | -1781 | 21397 | AN5218 |
| 2282 | CONTIG89 | 201676 | 202636 | 0.7  | 1.64E-01 | transcription_start_site | - | 200058 | 200058 | -2098 | 21396 | AN5218 |
| 2282 | CONTIG89 | 201676 | 202636 | 0.7  | 1.64E-01 | transcription_start_site | - | 199217 | 199217 | -2939 | 21397 | AN5218 |

|      |          |        |        |      |          |                          |   |        |        |       |       |        |
|------|----------|--------|--------|------|----------|--------------------------|---|--------|--------|-------|-------|--------|
| 1592 | CONTIG89 | 200861 | 201135 | 1.21 | 4.78E-02 | transcription_start_site | - | 201433 | 201433 | 435   | 21401 | AN5219 |
| 1592 | CONTIG89 | 200861 | 201135 | 1.21 | 4.78E-02 | transcription_start_site | - | 201637 | 201637 | 639   | 21400 | AN5219 |
| 1592 | CONTIG89 | 200861 | 201135 | 1.21 | 4.78E-02 | transcription_start_site | - | 201809 | 201809 | 811   | 21399 | AN5219 |
| 2282 | CONTIG89 | 201676 | 202636 | 0.7  | 1.64E-01 | transcription_start_site | - | 202190 | 202190 | 34    | 21398 | AN5219 |
| 2282 | CONTIG89 | 201676 | 202636 | 0.7  | 1.64E-01 | transcription_start_site | - | 201809 | 201809 | -347  | 21399 | AN5219 |
| 2282 | CONTIG89 | 201676 | 202636 | 0.7  | 1.64E-01 | transcription_start_site | - | 201637 | 201637 | -519  | 21400 | AN5219 |
| 2282 | CONTIG89 | 201676 | 202636 | 0.7  | 1.64E-01 | transcription_start_site | - | 201433 | 201433 | -723  | 21401 | AN5219 |
| 1592 | CONTIG89 | 200861 | 201135 | 1.21 | 4.78E-02 | transcription_start_site | + | 202631 | 202631 | -1633 | 21402 | AN5220 |
| 1592 | CONTIG89 | 200861 | 201135 | 1.21 | 4.78E-02 | transcription_start_site | + | 202799 | 202799 | -1801 | 21403 | AN5220 |
| 1592 | CONTIG89 | 200861 | 201135 | 1.21 | 4.78E-02 | transcription_start_site | + | 202971 | 202971 | -1973 | 21404 | AN5220 |
| 1592 | CONTIG89 | 200861 | 201135 | 1.21 | 4.78E-02 | transcription_start_site | + | 203362 | 203362 | -2364 | 21405 | AN5220 |
| 1592 | CONTIG89 | 200861 | 201135 | 1.21 | 4.78E-02 | transcription_start_site | + | 204081 | 204081 | -3083 | 21406 | AN5220 |
| 1592 | CONTIG89 | 200861 | 201135 | 1.21 | 4.78E-02 | transcription_start_site | + | 204677 | 204677 | -3679 | 21407 | AN5220 |
| 2282 | CONTIG89 | 201676 | 202636 | 0.7  | 1.64E-01 | transcription_start_site | + | 202631 | 202631 | -475  | 21402 | AN5220 |
| 2282 | CONTIG89 | 201676 | 202636 | 0.7  | 1.64E-01 | transcription_start_site | + | 202799 | 202799 | -643  | 21403 | AN5220 |
| 2282 | CONTIG89 | 201676 | 202636 | 0.7  | 1.64E-01 | transcription_start_site | + | 202971 | 202971 | -815  | 21404 | AN5220 |
| 2282 | CONTIG89 | 201676 | 202636 | 0.7  | 1.64E-01 | transcription_start_site | + | 203362 | 203362 | -1206 | 21405 | AN5220 |
| 2282 | CONTIG89 | 201676 | 202636 | 0.7  | 1.64E-01 | transcription_start_site | + | 204081 | 204081 | -1925 | 21406 | AN5220 |
| 2282 | CONTIG89 | 201676 | 202636 | 0.7  | 1.64E-01 | transcription_start_site | + | 204677 | 204677 | -2521 | 21407 | AN5220 |
| 524  | CONTIG89 | 217808 | 218092 | 2.28 | 2.26E-04 | transcription_start_site | - | 214665 | 214665 | -3285 | 21416 | AN5223 |
| 524  | CONTIG89 | 217808 | 218092 | 2.28 | 2.26E-04 | transcription_start_site | - | 214196 | 214196 | -3754 | 21417 | AN5223 |
| 524  | CONTIG89 | 217808 | 218092 | 2.28 | 2.26E-04 | transcription_start_site | - | 214088 | 214088 | -3862 | 21418 | AN5223 |
| 524  | CONTIG89 | 217808 | 218092 | 2.28 | 2.26E-04 | transcription_start_site | + | 218647 | 218647 | -697  | 21424 | AN5225 |
| 524  | CONTIG89 | 217808 | 218092 | 2.28 | 2.26E-04 | transcription_start_site | + | 219609 | 219609 | -1659 | 21425 | AN5225 |
| 524  | CONTIG89 | 217808 | 218092 | 2.28 | 2.26E-04 | transcription_start_site | + | 219970 | 219970 | -2020 | 21426 | AN5225 |
| 524  | CONTIG89 | 217808 | 218092 | 2.28 | 2.26E-04 | transcription_start_site | + | 220131 | 220131 | -2181 | 21427 | AN5225 |
| 129  | CONTIG89 | 224567 | 225141 | 3.01 | 0.00E+00 | transcription_start_site | - | 223332 | 223332 | -1522 | 21428 | AN5226 |
| 129  | CONTIG89 | 224567 | 225141 | 3.01 | 0.00E+00 | transcription_start_site | - | 222866 | 222866 | -1988 | 21429 | AN5226 |
| 129  | CONTIG89 | 224567 | 225141 | 3.01 | 0.00E+00 | transcription_start_site | - | 222641 | 222641 | -2213 | 21430 | AN5226 |
| 1005 | CONTIG89 | 227492 | 227901 | 1.71 | 7.70E-03 | transcription_start_site | - | 223332 | 223332 | -4364 | 21428 | AN5226 |
| 1005 | CONTIG89 | 227492 | 227901 | 1.71 | 7.70E-03 | transcription_start_site | - | 222866 | 222866 | -4830 | 21429 | AN5226 |
| 1005 | CONTIG89 | 227492 | 227901 | 1.71 | 7.70E-03 | transcription_start_site | - | 222641 | 222641 | -5055 | 21430 | AN5226 |
| 1005 | CONTIG89 | 227492 | 227901 | 1.71 | 7.70E-03 | transcription_start_site | + | 232393 | 232393 | -4696 | 21431 | AN5227 |
| 1005 | CONTIG89 | 227492 | 227901 | 1.71 | 7.70E-03 | transcription_start_site | + | 232572 | 232572 | -4875 | 21432 | AN5227 |
| 2340 | CONTIG89 | 237991 | 239020 | 0.6  | 1.96E-01 | transcription_start_site | - | 237276 | 237276 | -1229 | 21434 | AN5228 |
| 2340 | CONTIG89 | 237991 | 239020 | 0.6  | 1.96E-01 | transcription_start_site | - | 238244 | 238244 | -261  | 21439 | AN5229 |
| 2340 | CONTIG89 | 237991 | 239020 | 0.6  | 1.96E-01 | transcription_start_site | + | 241183 | 241183 | -2677 | 21440 | AN5230 |
| 2340 | CONTIG89 | 237991 | 239020 | 0.6  | 1.96E-01 | transcription_start_site | + | 241705 | 241705 | -3199 | 21441 | AN5230 |
| 2340 | CONTIG89 | 237991 | 239020 | 0.6  | 1.96E-01 | transcription_start_site | + | 242821 | 242821 | -4315 | 21442 | AN5231 |
| 1540 | CONTIG89 | 253133 | 253637 | 1.24 | 4.20E-02 | transcription_start_site | - | 249094 | 249094 | -4291 | 21444 | AN5233 |
| 1540 | CONTIG89 | 253133 | 253637 | 1.24 | 4.20E-02 | transcription_start_site | - | 251095 | 251095 | -2290 | 21448 | AN5234 |
| 1540 | CONTIG89 | 253133 | 253637 | 1.24 | 4.20E-02 | transcription_start_site | - | 250702 | 250702 | -2683 | 21449 | AN5234 |
| 1540 | CONTIG89 | 253133 | 253637 | 1.24 | 4.20E-02 | transcription_start_site | + | 253706 | 253706 | -321  | 21452 | AN5236 |
| 1540 | CONTIG89 | 253133 | 253637 | 1.24 | 4.20E-02 | transcription_start_site | + | 253963 | 253963 | -578  | 21453 | AN5236 |
| 1540 | CONTIG89 | 253133 | 253637 | 1.24 | 4.20E-02 | transcription_start_site | + | 254223 | 254223 | -838  | 21454 | AN5236 |
| 2347 | CONTIG92 | 38853  | 39727  | 0.57 | 6.93E-02 | transcription_start_site | - | 38131  | 38131  | -1159 | 21533 | AN5257 |
| 2347 | CONTIG92 | 38853  | 39727  | 0.57 | 6.93E-02 | transcription_start_site | - | 37934  | 37934  | -1356 | 21534 | AN5257 |
| 2347 | CONTIG92 | 38853  | 39727  | 0.57 | 6.93E-02 | transcription_start_site | - | 37739  | 37739  | -1551 | 21535 | AN5257 |
| 2347 | CONTIG92 | 38853  | 39727  | 0.57 | 6.93E-02 | transcription_start_site | - | 37477  | 37477  | -1813 | 21536 | AN5257 |
| 2347 | CONTIG92 | 38853  | 39727  | 0.57 | 6.93E-02 | transcription_start_site | - | 37048  | 37048  | -2242 | 21537 | AN5257 |
| 2347 | CONTIG92 | 38853  | 39727  | 0.57 | 6.93E-02 | transcription_start_site | + | 40613  | 40613  | -1323 | 21538 | AN5258 |
| 2347 | CONTIG92 | 38853  | 39727  | 0.57 | 6.93E-02 | transcription_start_site | + | 40924  | 40924  | -1634 | 21539 | AN5258 |
| 2347 | CONTIG92 | 38853  | 39727  | 0.57 | 6.93E-02 | transcription_start_site | + | 41218  | 41218  | -1928 | 21540 | AN5258 |
| 2347 | CONTIG92 | 38853  | 39727  | 0.57 | 6.93E-02 | transcription_start_site | + | 41677  | 41677  | -2387 | 21541 | AN5258 |
| 2356 | CONTIG92 | 34668  | 35687  | 0.51 | 1.97E-01 | transcription_start_site | + | 40613  | 40613  | -5435 | 21538 | AN5258 |
| 2240 | CONTIG92 | 49358  | 49852  | 0.75 | 5.36E-02 | transcription_start_site | - | 45899  | 45899  | -3706 | 21542 | AN5259 |
| 2240 | CONTIG92 | 49358  | 49852  | 0.75 | 5.36E-02 | transcription_start_site | - | 45699  | 45699  | -3906 | 21543 | AN5259 |



|      |          |       |       |      |          |                          |   |       |       |       |       |        |
|------|----------|-------|-------|------|----------|--------------------------|---|-------|-------|-------|-------|--------|
| 2240 | CONTIG92 | 49358 | 49852 | 0.75 | 5.36E-02 | transcription_start_site | - | 45581 | 45581 | -4024 | 21544 | AN5259 |
| 2240 | CONTIG92 | 49358 | 49852 | 0.75 | 5.36E-02 | transcription_start_site | - | 45206 | 45206 | -4399 | 21545 | AN5259 |
| 2240 | CONTIG92 | 49358 | 49852 | 0.75 | 5.36E-02 | transcription_start_site | - | 44393 | 44393 | -5212 | 21546 | AN5259 |
| 2365 | CONTIG92 | 49893 | 50607 | 0.47 | 1.41E-01 | transcription_start_site | - | 45899 | 45899 | -4351 | 21542 | AN5259 |
| 2365 | CONTIG92 | 49893 | 50607 | 0.47 | 1.41E-01 | transcription_start_site | - | 45699 | 45699 | -4551 | 21543 | AN5259 |
| 2365 | CONTIG92 | 49893 | 50607 | 0.47 | 1.41E-01 | transcription_start_site | - | 45581 | 45581 | -4669 | 21544 | AN5259 |
| 2365 | CONTIG92 | 49893 | 50607 | 0.47 | 1.41E-01 | transcription_start_site | - | 45206 | 45206 | -5044 | 21545 | AN5259 |
| 2240 | CONTIG92 | 49358 | 49852 | 0.75 | 5.36E-02 | transcription_start_site | - | 49243 | 49243 | -362  | 21556 | AN5261 |
| 2240 | CONTIG92 | 49358 | 49852 | 0.75 | 5.36E-02 | transcription_start_site | - | 49172 | 49172 | -433  | 21557 | AN5261 |
| 2240 | CONTIG92 | 49358 | 49852 | 0.75 | 5.36E-02 | transcription_start_site | - | 48967 | 48967 | -638  | 21558 | AN5261 |
| 2240 | CONTIG92 | 49358 | 49852 | 0.75 | 5.36E-02 | transcription_start_site | - | 48593 | 48593 | -1012 | 21559 | AN5261 |
| 2240 | CONTIG92 | 49358 | 49852 | 0.75 | 5.36E-02 | transcription_start_site | - | 48362 | 48362 | -1243 | 21560 | AN5261 |
| 2365 | CONTIG92 | 49893 | 50607 | 0.47 | 1.41E-01 | transcription_start_site | - | 49243 | 49243 | -1007 | 21556 | AN5261 |
| 2365 | CONTIG92 | 49893 | 50607 | 0.47 | 1.41E-01 | transcription_start_site | - | 49172 | 49172 | -1078 | 21557 | AN5261 |
| 2365 | CONTIG92 | 49893 | 50607 | 0.47 | 1.41E-01 | transcription_start_site | - | 48967 | 48967 | -1283 | 21558 | AN5261 |
| 2365 | CONTIG92 | 49893 | 50607 | 0.47 | 1.41E-01 | transcription_start_site | - | 48593 | 48593 | -1657 | 21559 | AN5261 |
| 2365 | CONTIG92 | 49893 | 50607 | 0.47 | 1.41E-01 | transcription_start_site | - | 48362 | 48362 | -1888 | 21560 | AN5261 |
| 2240 | CONTIG92 | 49358 | 49852 | 0.75 | 5.36E-02 | transcription_start_site | + | 49997 | 49997 | -392  | 21561 | AN5262 |
| 2240 | CONTIG92 | 49358 | 49852 | 0.75 | 5.36E-02 | transcription_start_site | + | 50285 | 50285 | -680  | 21562 | AN5262 |
| 2240 | CONTIG92 | 49358 | 49852 | 0.75 | 5.36E-02 | transcription_start_site | + | 51204 | 51204 | -1599 | 21563 | AN5262 |
| 2365 | CONTIG92 | 49893 | 50607 | 0.47 | 1.41E-01 | transcription_start_site | + | 50285 | 50285 | -35   | 21562 | AN5262 |
| 2365 | CONTIG92 | 49893 | 50607 | 0.47 | 1.41E-01 | transcription_start_site | + | 49997 | 49997 | 253   | 21561 | AN5262 |
| 2365 | CONTIG92 | 49893 | 50607 | 0.47 | 1.41E-01 | transcription_start_site | + | 51204 | 51204 | -954  | 21563 | AN5262 |
| 2366 | CONTIG92 | 54918 | 55407 | 0.47 | 1.81E-01 | transcription_start_site | - | 55257 | 55257 | 94    | 21564 | AN5263 |
| 2366 | CONTIG92 | 54918 | 55407 | 0.47 | 1.81E-01 | transcription_start_site | - | 54544 | 54544 | -618  | 21565 | AN5263 |
| 2366 | CONTIG92 | 54918 | 55407 | 0.47 | 1.81E-01 | transcription_start_site | - | 53882 | 53882 | -1280 | 21566 | AN5263 |
| 2366 | CONTIG92 | 54918 | 55407 | 0.47 | 1.81E-01 | transcription_start_site | - | 53627 | 53627 | -1535 | 21567 | AN5263 |
| 2366 | CONTIG92 | 54918 | 55407 | 0.47 | 1.81E-01 | transcription_start_site | + | 56209 | 56209 | -1046 | 21568 | AN5264 |
| 2366 | CONTIG92 | 54918 | 55407 | 0.47 | 1.81E-01 | transcription_start_site | + | 56268 | 56268 | -1105 | 21569 | AN5264 |
| 2366 | CONTIG92 | 54918 | 55407 | 0.47 | 1.81E-01 | transcription_start_site | + | 56491 | 56491 | -1328 | 21570 | AN5264 |
| 2366 | CONTIG92 | 54918 | 55407 | 0.47 | 1.81E-01 | transcription_start_site | + | 56751 | 56751 | -1588 | 21571 | AN5264 |
| 2366 | CONTIG92 | 54918 | 55407 | 0.47 | 1.81E-01 | transcription_start_site | + | 57041 | 57041 | -1878 | 21572 | AN5264 |
| 2366 | CONTIG92 | 54918 | 55407 | 0.47 | 1.81E-01 | transcription_start_site | + | 57190 | 57190 | -2027 | 21573 | AN5264 |
| 2366 | CONTIG92 | 54918 | 55407 | 0.47 | 1.81E-01 | transcription_start_site | + | 57316 | 57316 | -2153 | 21574 | AN5264 |
| 2366 | CONTIG92 | 54918 | 55407 | 0.47 | 1.81E-01 | transcription_start_site | + | 57425 | 57425 | -2262 | 21575 | AN5264 |
| 2366 | CONTIG92 | 54918 | 55407 | 0.47 | 1.81E-01 | transcription_start_site | + | 57912 | 57912 | -2749 | 21576 | AN5264 |
| 2366 | CONTIG92 | 54918 | 55407 | 0.47 | 1.81E-01 | transcription_start_site | + | 58175 | 58175 | -3012 | 21577 | AN5264 |
| 2366 | CONTIG92 | 54918 | 55407 | 0.47 | 1.81E-01 | transcription_start_site | + | 58370 | 58370 | -3207 | 21578 | AN5264 |
| 2366 | CONTIG92 | 54918 | 55407 | 0.47 | 1.81E-01 | transcription_start_site | + | 58555 | 58555 | -3392 | 21579 | AN5264 |
| 1041 | CONTIG93 | 25518 | 25927 | 1.68 | 2.05E-02 | transcription_start_site | + | 26242 | 26242 | -519  | 21609 | AN5274 |
| 1041 | CONTIG93 | 25518 | 25927 | 1.68 | 2.05E-02 | transcription_start_site | + | 26362 | 26362 | -639  | 21610 | AN5274 |
| 1041 | CONTIG93 | 25518 | 25927 | 1.68 | 2.05E-02 | transcription_start_site | + | 26486 | 26486 | -763  | 21611 | AN5274 |
| 1041 | CONTIG93 | 25518 | 25927 | 1.68 | 2.05E-02 | transcription_start_site | + | 26882 | 26882 | -1159 | 21612 | AN5274 |
| 1041 | CONTIG93 | 25518 | 25927 | 1.68 | 2.05E-02 | transcription_start_site | + | 27848 | 27848 | -2125 | 21613 | AN5274 |
| 1041 | CONTIG93 | 25518 | 25927 | 1.68 | 2.05E-02 | transcription_start_site | + | 29070 | 29070 | -3347 | 21614 | AN5275 |
| 1041 | CONTIG93 | 25518 | 25927 | 1.68 | 2.05E-02 | transcription_start_site | + | 29161 | 29161 | -3438 | 21615 | AN5275 |
| 1041 | CONTIG93 | 25518 | 25927 | 1.68 | 2.05E-02 | transcription_start_site | + | 29542 | 29542 | -3819 | 21616 | AN5275 |
| 1041 | CONTIG93 | 25518 | 25927 | 1.68 | 2.05E-02 | transcription_start_site | + | 29823 | 29823 | -4100 | 21617 | AN5275 |
| 1041 | CONTIG93 | 25518 | 25927 | 1.68 | 2.05E-02 | transcription_start_site | + | 30228 | 30228 | -4505 | 21618 | AN5275 |
| 1041 | CONTIG93 | 25518 | 25927 | 1.68 | 2.05E-02 | transcription_start_site | + | 30791 | 30791 | -5068 | 21619 | AN5275 |
| 1947 | CONTIG93 | 32933 | 33210 | 0.98 | 1.76E-01 | transcription_start_site | + | 31990 | 31990 | 1081  | 21622 | AN5276 |
| 1947 | CONTIG93 | 32933 | 33210 | 0.98 | 1.76E-01 | transcription_start_site | + | 33721 | 33721 | -649  | 21623 | AN5277 |
| 1947 | CONTIG93 | 32933 | 33210 | 0.98 | 1.76E-01 | transcription_start_site | + | 34150 | 34150 | -1078 | 21624 | AN5277 |
| 1596 | CONTIG93 | 40058 | 40342 | 1.21 | 8.63E-02 | transcription_start_site | - | 39957 | 39957 | -243  | 21625 | AN5278 |
| 1596 | CONTIG93 | 40058 | 40342 | 1.21 | 8.63E-02 | transcription_start_site | - | 39265 | 39265 | -935  | 21626 | AN5278 |
| 1596 | CONTIG93 | 40058 | 40342 | 1.21 | 8.63E-02 | transcription_start_site | - | 36693 | 36693 | -3507 | 21627 | AN5278 |
| 1596 | CONTIG93 | 40058 | 40342 | 1.21 | 8.63E-02 | transcription_start_site | - | 36060 | 36060 | -4140 | 21628 | AN5278 |

|      |          |        |        |      |          |                          |   |        |        |       |       |        |
|------|----------|--------|--------|------|----------|--------------------------|---|--------|--------|-------|-------|--------|
| 1596 | CONTIG93 | 40058  | 40342  | 1.21 | 8.63E-02 | transcription_start_site | + | 40745  | 40745  | -545  | 21629 | AN5279 |
| 1596 | CONTIG93 | 40058  | 40342  | 1.21 | 8.63E-02 | transcription_start_site | + | 40958  | 40958  | -758  | 21630 | AN5279 |
| 1596 | CONTIG93 | 40058  | 40342  | 1.21 | 8.63E-02 | transcription_start_site | + | 41413  | 41413  | -1213 | 21631 | AN5279 |
| 172  | CONTIG93 | 55733  | 56159  | 2.89 | 0.00E+00 | transcription_start_site | + | 56062  | 56062  | -116  | 21660 | AN5283 |
| 172  | CONTIG93 | 55733  | 56159  | 2.89 | 0.00E+00 | transcription_start_site | + | 56881  | 56881  | -935  | 21661 | AN5283 |
| 792  | CONTIG93 | 97142  | 98081  | 1.95 | 9.32E-03 | transcription_start_site | - | 97067  | 97067  | -544  | 21709 | AN5295 |
| 792  | CONTIG93 | 97142  | 98081  | 1.95 | 9.32E-03 | transcription_start_site | + | 98122  | 98122  | -510  | 21710 | AN5296 |
| 792  | CONTIG93 | 97142  | 98081  | 1.95 | 9.32E-03 | transcription_start_site | + | 101728 | 101728 | -4116 | 21712 | AN5298 |
| 792  | CONTIG93 | 97142  | 98081  | 1.95 | 9.32E-03 | transcription_start_site | + | 101978 | 101978 | -4366 | 21713 | AN5298 |
| 792  | CONTIG93 | 97142  | 98081  | 1.95 | 9.32E-03 | transcription_start_site | + | 102346 | 102346 | -4734 | 21714 | AN5298 |
| 2166 | CONTIG93 | 116718 | 117731 | 0.82 | 1.07E-01 | transcription_start_site | - | 116292 | 116292 | -932  | 21720 | AN5302 |
| 2166 | CONTIG93 | 116718 | 117731 | 0.82 | 1.07E-01 | transcription_start_site | - | 116158 | 116158 | -1066 | 21721 | AN5302 |
| 2166 | CONTIG93 | 116718 | 117731 | 0.82 | 1.07E-01 | transcription_start_site | - | 114468 | 114468 | -2756 | 21722 | AN5302 |
| 2166 | CONTIG93 | 116718 | 117731 | 0.82 | 1.07E-01 | transcription_start_site | + | 117579 | 117579 | -354  | 21723 | AN5303 |
| 2166 | CONTIG93 | 116718 | 117731 | 0.82 | 1.07E-01 | transcription_start_site | + | 117776 | 117776 | -551  | 21724 | AN5303 |
| 2166 | CONTIG93 | 116718 | 117731 | 0.82 | 1.07E-01 | transcription_start_site | + | 117999 | 117999 | -774  | 21725 | AN5303 |
| 2166 | CONTIG93 | 116718 | 117731 | 0.82 | 1.07E-01 | transcription_start_site | + | 118193 | 118193 | -968  | 21726 | AN5303 |
| 2166 | CONTIG93 | 116718 | 117731 | 0.82 | 1.07E-01 | transcription_start_site | + | 120210 | 120210 | -2985 | 21727 | AN5304 |
| 2166 | CONTIG93 | 116718 | 117731 | 0.82 | 1.07E-01 | transcription_start_site | + | 120474 | 120474 | -3249 | 21728 | AN5304 |
| 2166 | CONTIG93 | 116718 | 117731 | 0.82 | 1.07E-01 | transcription_start_site | + | 120824 | 120824 | -3599 | 21729 | AN5304 |
| 2166 | CONTIG93 | 116718 | 117731 | 0.82 | 1.07E-01 | transcription_start_site | + | 121300 | 121300 | -4075 | 21730 | AN5304 |
| 2166 | CONTIG93 | 116718 | 117731 | 0.82 | 1.07E-01 | transcription_start_site | + | 121810 | 121810 | -4585 | 21731 | AN5304 |
| 2166 | CONTIG93 | 116718 | 117731 | 0.82 | 1.07E-01 | transcription_start_site | + | 122032 | 122032 | -4807 | 21732 | AN5304 |
| 1208 | CONTIG93 | 143334 | 143692 | 1.52 | 3.34E-02 | transcription_start_site | - | 141963 | 141963 | -1550 | 21749 | AN5311 |
| 1208 | CONTIG93 | 143334 | 143692 | 1.52 | 3.34E-02 | transcription_start_site | - | 141714 | 141714 | -1799 | 21750 | AN5311 |
| 1208 | CONTIG93 | 143334 | 143692 | 1.52 | 3.34E-02 | transcription_start_site | - | 141479 | 141479 | -2034 | 21751 | AN5311 |
| 1208 | CONTIG93 | 143334 | 143692 | 1.52 | 3.34E-02 | transcription_start_site | - | 141152 | 141152 | -2361 | 21752 | AN5311 |
| 1208 | CONTIG93 | 143334 | 143692 | 1.52 | 3.34E-02 | transcription_start_site | + | 144794 | 144794 | -1281 | 21753 | AN5312 |
| 1208 | CONTIG93 | 143334 | 143692 | 1.52 | 3.34E-02 | transcription_start_site | + | 145038 | 145038 | -1525 | 21754 | AN5312 |
| 1208 | CONTIG93 | 143334 | 143692 | 1.52 | 3.34E-02 | transcription_start_site | + | 145322 | 145322 | -1809 | 21755 | AN5312 |
| 1208 | CONTIG93 | 143334 | 143692 | 1.52 | 3.34E-02 | transcription_start_site | + | 145520 | 145520 | -2007 | 21756 | AN5312 |
| 1208 | CONTIG93 | 143334 | 143692 | 1.52 | 3.34E-02 | transcription_start_site | + | 145710 | 145710 | -2197 | 21757 | AN5312 |
| 423  | CONTIG93 | 163585 | 164089 | 2.42 | 1.45E-03 | transcription_start_site | - | 161650 | 161650 | -2187 | 21767 | AN5317 |
| 423  | CONTIG93 | 163585 | 164089 | 2.42 | 1.45E-03 | transcription_start_site | - | 161143 | 161143 | -2694 | 21768 | AN5317 |
| 423  | CONTIG93 | 163585 | 164089 | 2.42 | 1.45E-03 | transcription_start_site | + | 164592 | 164592 | -755  | 21769 | AN5318 |
| 71   | CONTIG93 | 181296 | 181870 | 3.17 | 0.00E+00 | transcription_start_site | - | 177062 | 177062 | -4521 | 21778 | AN5321 |
| 71   | CONTIG93 | 181296 | 181870 | 3.17 | 0.00E+00 | transcription_start_site | - | 176713 | 176713 | -4870 | 21779 | AN5321 |
| 71   | CONTIG93 | 181296 | 181870 | 3.17 | 0.00E+00 | transcription_start_site | - | 176466 | 176466 | -5117 | 21780 | AN5321 |
| 71   | CONTIG93 | 181296 | 181870 | 3.17 | 0.00E+00 | transcription_start_site | - | 180921 | 180921 | -662  | 21784 | AN5323 |
| 71   | CONTIG93 | 181296 | 181870 | 3.17 | 0.00E+00 | transcription_start_site | - | 180508 | 180508 | -1075 | 21785 | AN5323 |
| 71   | CONTIG93 | 181296 | 181870 | 3.17 | 0.00E+00 | transcription_start_site | - | 180379 | 180379 | -1204 | 21786 | AN5323 |
| 71   | CONTIG93 | 181296 | 181870 | 3.17 | 0.00E+00 | transcription_start_site | - | 179992 | 179992 | -1591 | 21787 | AN5323 |
| 923  | CONTIG93 | 182926 | 185319 | 1.8  | 0.00E+00 | transcription_start_site | - | 180921 | 180921 | -3201 | 21784 | AN5323 |
| 923  | CONTIG93 | 182926 | 185319 | 1.8  | 0.00E+00 | transcription_start_site | - | 180508 | 180508 | -3614 | 21785 | AN5323 |
| 923  | CONTIG93 | 182926 | 185319 | 1.8  | 0.00E+00 | transcription_start_site | - | 180379 | 180379 | -3743 | 21786 | AN5323 |
| 923  | CONTIG93 | 182926 | 185319 | 1.8  | 0.00E+00 | transcription_start_site | - | 179992 | 179992 | -4130 | 21787 | AN5323 |
| 923  | CONTIG93 | 182926 | 185319 | 1.8  | 0.00E+00 | transcription_start_site | - | 184515 | 184515 | 392   | 21788 | AN5324 |
| 923  | CONTIG93 | 182926 | 185319 | 1.8  | 0.00E+00 | transcription_start_site | - | 183047 | 183047 | -1075 | 21789 | AN5324 |
| 1948 | CONTIG93 | 187670 | 188019 | 0.98 | 1.76E-01 | transcription_start_site | - | 184515 | 184515 | -3329 | 21788 | AN5324 |
| 1948 | CONTIG93 | 187670 | 188019 | 0.98 | 1.76E-01 | transcription_start_site | - | 183047 | 183047 | -4797 | 21789 | AN5324 |
| 923  | CONTIG93 | 182926 | 185319 | 1.8  | 0.00E+00 | transcription_start_site | + | 188097 | 188097 | -3974 | 21790 | AN5325 |
| 923  | CONTIG93 | 182926 | 185319 | 1.8  | 0.00E+00 | transcription_start_site | + | 188419 | 188419 | -4296 | 21791 | AN5325 |
| 1948 | CONTIG93 | 187670 | 188019 | 0.98 | 1.76E-01 | transcription_start_site | + | 188097 | 188097 | -252  | 21790 | AN5325 |
| 1948 | CONTIG93 | 187670 | 188019 | 0.98 | 1.76E-01 | transcription_start_site | + | 188419 | 188419 | -574  | 21791 | AN5325 |
| 923  | CONTIG93 | 182926 | 185319 | 1.8  | 0.00E+00 | transcription_start_site | + | 189394 | 189394 | -5271 | 21792 | AN5326 |
| 923  | CONTIG93 | 182926 | 185319 | 1.8  | 0.00E+00 | transcription_start_site | + | 189769 | 189769 | -5646 | 21793 | AN5326 |
| 923  | CONTIG93 | 182926 | 185319 | 1.8  | 0.00E+00 | transcription_start_site | + | 190053 | 190053 | -5930 | 21794 | AN5326 |

|      |          |        |        |      |          |                          |   |        |        |       |       |        |
|------|----------|--------|--------|------|----------|--------------------------|---|--------|--------|-------|-------|--------|
| 1948 | CONTIG93 | 187670 | 188019 | 0.98 | 1.76E-01 | transcription_start_site | + | 189394 | 189394 | -1549 | 21792 | AN5326 |
| 1948 | CONTIG93 | 187670 | 188019 | 0.98 | 1.76E-01 | transcription_start_site | + | 189769 | 189769 | -1924 | 21793 | AN5326 |
| 1948 | CONTIG93 | 187670 | 188019 | 0.98 | 1.76E-01 | transcription_start_site | + | 190053 | 190053 | -2208 | 21794 | AN5326 |
| 1948 | CONTIG93 | 187670 | 188019 | 0.98 | 1.76E-01 | transcription_start_site | + | 190337 | 190337 | -2492 | 21795 | AN5326 |
| 1245 | CONTIG93 | 206331 | 206695 | 1.49 | 1.83E-02 | transcription_start_site | - | 203255 | 203255 | -3258 | 21806 | AN5331 |
| 1245 | CONTIG93 | 206331 | 206695 | 1.49 | 1.83E-02 | transcription_start_site | - | 203094 | 203094 | -3419 | 21807 | AN5331 |
| 1245 | CONTIG93 | 206331 | 206695 | 1.49 | 1.83E-02 | transcription_start_site | - | 202709 | 202709 | -3804 | 21808 | AN5331 |
| 1245 | CONTIG93 | 206331 | 206695 | 1.49 | 1.83E-02 | transcription_start_site | + | 206595 | 206595 | -82   | 21809 | AN5332 |
| 1245 | CONTIG93 | 206331 | 206695 | 1.49 | 1.83E-02 | transcription_start_site | + | 206977 | 206977 | -464  | 21810 | AN5332 |
| 1038 | CONTIG93 | 231004 | 231653 | 1.68 | 8.99E-03 | transcription_start_site | - | 227053 | 227053 | -4275 | 21825 | AN5339 |
| 1038 | CONTIG93 | 231004 | 231653 | 1.68 | 8.99E-03 | transcription_start_site | - | 226890 | 226890 | -4438 | 21826 | AN5339 |
| 1038 | CONTIG93 | 231004 | 231653 | 1.68 | 8.99E-03 | transcription_start_site | - | 226605 | 226605 | -4723 | 21827 | AN5339 |
| 284  | CONTIG93 | 233114 | 233683 | 2.66 | 0.00E+00 | transcription_start_site | - | 228558 | 228558 | -4840 | 21828 | AN5340 |
| 1038 | CONTIG93 | 231004 | 231653 | 1.68 | 8.99E-03 | transcription_start_site | - | 228558 | 228558 | -2770 | 21828 | AN5340 |
| 284  | CONTIG93 | 233114 | 233683 | 2.66 | 0.00E+00 | transcription_start_site | + | 232580 | 232580 | 818   | 21830 | AN5341 |
| 284  | CONTIG93 | 233114 | 233683 | 2.66 | 0.00E+00 | transcription_start_site | + | 232371 | 232371 | 1027  | 21829 | AN5341 |
| 1038 | CONTIG93 | 231004 | 231653 | 1.68 | 8.99E-03 | transcription_start_site | + | 232371 | 232371 | -1042 | 21829 | AN5341 |
| 1038 | CONTIG93 | 231004 | 231653 | 1.68 | 8.99E-03 | transcription_start_site | + | 232580 | 232580 | -1251 | 21830 | AN5341 |
| 284  | CONTIG93 | 233114 | 233683 | 2.66 | 0.00E+00 | transcription_start_site | + | 233821 | 233821 | -422  | 21831 | AN5342 |
| 284  | CONTIG93 | 233114 | 233683 | 2.66 | 0.00E+00 | transcription_start_site | + | 234206 | 234206 | -807  | 21832 | AN5342 |
| 1038 | CONTIG93 | 231004 | 231653 | 1.68 | 8.99E-03 | transcription_start_site | + | 233821 | 233821 | -2492 | 21831 | AN5342 |
| 1038 | CONTIG93 | 231004 | 231653 | 1.68 | 8.99E-03 | transcription_start_site | + | 234206 | 234206 | -2877 | 21832 | AN5342 |
| 1886 | CONTIG93 | 253290 | 253554 | 1.02 | 1.54E-01 | transcription_start_site | - | 253021 | 253021 | -401  | 21854 | AN5349 |
| 1886 | CONTIG93 | 253290 | 253554 | 1.02 | 1.54E-01 | transcription_start_site | - | 252936 | 252936 | -486  | 21855 | AN5349 |
| 1886 | CONTIG93 | 253290 | 253554 | 1.02 | 1.54E-01 | transcription_start_site | - | 252566 | 252566 | -856  | 21856 | AN5349 |
| 1886 | CONTIG93 | 253290 | 253554 | 1.02 | 1.54E-01 | transcription_start_site | + | 253948 | 253948 | -526  | 21857 | AN5350 |
| 1886 | CONTIG93 | 253290 | 253554 | 1.02 | 1.54E-01 | transcription_start_site | + | 254701 | 254701 | -1279 | 21858 | AN5350 |
| 1886 | CONTIG93 | 253290 | 253554 | 1.02 | 1.54E-01 | transcription_start_site | + | 254843 | 254843 | -1421 | 21859 | AN5350 |
| 1042 | CONTIG93 | 258230 | 258504 | 1.68 | 2.05E-02 | transcription_start_site | - | 256217 | 256217 | -2150 | 21860 | AN5351 |
| 1042 | CONTIG93 | 258230 | 258504 | 1.68 | 2.05E-02 | transcription_start_site | - | 255965 | 255965 | -2402 | 21861 | AN5351 |
| 1042 | CONTIG93 | 258230 | 258504 | 1.68 | 2.05E-02 | transcription_start_site | - | 255802 | 255802 | -2565 | 21862 | AN5351 |
| 285  | CONTIG93 | 264920 | 265554 | 2.66 | 2.26E-04 | transcription_start_site | - | 262385 | 262385 | -2852 | 21863 | AN5353 |
| 285  | CONTIG93 | 264920 | 265554 | 2.66 | 2.26E-04 | transcription_start_site | - | 262246 | 262246 | -2991 | 21864 | AN5353 |
| 285  | CONTIG93 | 264920 | 265554 | 2.66 | 2.26E-04 | transcription_start_site | + | 265652 | 265652 | -415  | 21865 | AN5354 |
| 285  | CONTIG93 | 264920 | 265554 | 2.66 | 2.26E-04 | transcription_start_site | + | 265778 | 265778 | -541  | 21866 | AN5354 |
| 285  | CONTIG93 | 264920 | 265554 | 2.66 | 2.26E-04 | transcription_start_site | + | 266126 | 266126 | -889  | 21867 | AN5354 |
| 285  | CONTIG93 | 264920 | 265554 | 2.66 | 2.26E-04 | transcription_start_site | + | 267703 | 267703 | -2466 | 21868 | AN5355 |
| 285  | CONTIG93 | 264920 | 265554 | 2.66 | 2.26E-04 | transcription_start_site | + | 267948 | 267948 | -2711 | 21869 | AN5355 |
| 536  | CONTIG93 | 267395 | 267661 | 2.27 | 2.61E-03 | transcription_start_site | + | 267703 | 267703 | -175  | 21868 | AN5355 |
| 536  | CONTIG93 | 267395 | 267661 | 2.27 | 2.61E-03 | transcription_start_site | + | 267948 | 267948 | -420  | 21869 | AN5355 |
| 850  | CONTIG93 | 272640 | 273129 | 1.88 | 1.06E-02 | transcription_start_site | - | 272549 | 272549 | -335  | 21870 | AN5356 |
| 850  | CONTIG93 | 272640 | 273129 | 1.88 | 1.06E-02 | transcription_start_site | - | 272249 | 272249 | -635  | 21871 | AN5356 |
| 850  | CONTIG93 | 272640 | 273129 | 1.88 | 1.06E-02 | transcription_start_site | - | 272147 | 272147 | -737  | 21872 | AN5356 |
| 850  | CONTIG93 | 272640 | 273129 | 1.88 | 1.06E-02 | transcription_start_site | - | 271468 | 271468 | -1416 | 21873 | AN5356 |
| 117  | CONTIG93 | 279615 | 280104 | 3.05 | 0.00E+00 | transcription_start_site | - | 279054 | 279054 | -805  | 21874 | AN5357 |
| 117  | CONTIG93 | 279615 | 280104 | 3.05 | 0.00E+00 | transcription_start_site | - | 278922 | 278922 | -937  | 21875 | AN5357 |
| 117  | CONTIG93 | 279615 | 280104 | 3.05 | 0.00E+00 | transcription_start_site | - | 278694 | 278694 | -1165 | 21876 | AN5357 |
| 117  | CONTIG93 | 279615 | 280104 | 3.05 | 0.00E+00 | transcription_start_site | - | 278229 | 278229 | -1630 | 21877 | AN5357 |
| 117  | CONTIG93 | 279615 | 280104 | 3.05 | 0.00E+00 | transcription_start_site | - | 280005 | 280005 | 145   | 21880 | AN5358 |
| 117  | CONTIG93 | 279615 | 280104 | 3.05 | 0.00E+00 | transcription_start_site | - | 280424 | 280424 | 564   | 21879 | AN5358 |
| 117  | CONTIG93 | 279615 | 280104 | 3.05 | 0.00E+00 | transcription_start_site | - | 280582 | 280582 | 722   | 21878 | AN5358 |
| 117  | CONTIG93 | 279615 | 280104 | 3.05 | 0.00E+00 | transcription_start_site | + | 282134 | 282134 | -2274 | 21882 | AN5360 |
| 117  | CONTIG93 | 279615 | 280104 | 3.05 | 0.00E+00 | transcription_start_site | + | 283301 | 283301 | -3441 | 21883 | AN5360 |
| 117  | CONTIG93 | 279615 | 280104 | 3.05 | 0.00E+00 | transcription_start_site | + | 283464 | 283464 | -3604 | 21884 | AN5360 |
| 117  | CONTIG93 | 279615 | 280104 | 3.05 | 0.00E+00 | transcription_start_site | + | 283717 | 283717 | -3857 | 21885 | AN5360 |
| 117  | CONTIG93 | 279615 | 280104 | 3.05 | 0.00E+00 | transcription_start_site | + | 283909 | 283909 | -4049 | 21886 | AN5360 |
| 117  | CONTIG93 | 279615 | 280104 | 3.05 | 0.00E+00 | transcription_start_site | + | 284016 | 284016 | -4156 | 21887 | AN5360 |

|      |          |        |        |      |          |                          |   |        |        |       |       |        |
|------|----------|--------|--------|------|----------|--------------------------|---|--------|--------|-------|-------|--------|
| 1949 | CONTIG93 | 303766 | 304025 | 0.98 | 1.76E-01 | transcription_start_site | - | 298867 | 298867 | -5028 | 21900 | AN5366 |
| 1949 | CONTIG93 | 303766 | 304025 | 0.98 | 1.76E-01 | transcription_start_site | + | 303962 | 303962 | -66   | 21910 | AN5369 |
| 1949 | CONTIG93 | 303766 | 304025 | 0.98 | 1.76E-01 | transcription_start_site | + | 304430 | 304430 | -534  | 21911 | AN5369 |
| 1949 | CONTIG93 | 303766 | 304025 | 0.98 | 1.76E-01 | transcription_start_site | + | 305652 | 305652 | -1756 | 21912 | AN5369 |
| 1949 | CONTIG93 | 303766 | 304025 | 0.98 | 1.76E-01 | transcription_start_site | + | 307531 | 307531 | -3635 | 21913 | AN5370 |
| 1949 | CONTIG93 | 303766 | 304025 | 0.98 | 1.76E-01 | transcription_start_site | + | 307894 | 307894 | -3998 | 21914 | AN5370 |
| 1949 | CONTIG93 | 303766 | 304025 | 0.98 | 1.76E-01 | transcription_start_site | + | 308154 | 308154 | -4258 | 21915 | AN5370 |
| 1949 | CONTIG93 | 303766 | 304025 | 0.98 | 1.76E-01 | transcription_start_site | + | 308352 | 308352 | -4456 | 21916 | AN5370 |
| 1949 | CONTIG93 | 303766 | 304025 | 0.98 | 1.76E-01 | transcription_start_site | + | 308562 | 308562 | -4666 | 21917 | AN5370 |
| 12   | CONTIG93 | 312533 | 313107 | 3.52 | 0.00E+00 | transcription_start_site | - | 312434 | 312434 | -386  | 21920 | AN5371 |
| 12   | CONTIG93 | 312533 | 313107 | 3.52 | 0.00E+00 | transcription_start_site | - | 311124 | 311124 | -1696 | 21921 | AN5371 |
| 12   | CONTIG93 | 312533 | 313107 | 3.52 | 0.00E+00 | transcription_start_site | - | 311052 | 311052 | -1768 | 21922 | AN5371 |
| 12   | CONTIG93 | 312533 | 313107 | 3.52 | 0.00E+00 | transcription_start_site | + | 317583 | 317583 | -4763 | 21927 | AN5374 |
| 2174 | CONTIG93 | 327005 | 327744 | 0.82 | 1.64E-01 | transcription_start_site | + | 327514 | 327514 | -139  | 21935 | AN5378 |
| 2174 | CONTIG93 | 327005 | 327744 | 0.82 | 1.64E-01 | transcription_start_site | + | 327849 | 327849 | -474  | 21936 | AN5378 |
| 2174 | CONTIG93 | 327005 | 327744 | 0.82 | 1.64E-01 | transcription_start_site | + | 328114 | 328114 | -739  | 21937 | AN5378 |
| 2174 | CONTIG93 | 327005 | 327744 | 0.82 | 1.64E-01 | transcription_start_site | + | 328183 | 328183 | -808  | 21938 | AN5378 |
| 2174 | CONTIG93 | 327005 | 327744 | 0.82 | 1.64E-01 | transcription_start_site | + | 328283 | 328283 | -908  | 21939 | AN5378 |
| 2174 | CONTIG93 | 327005 | 327744 | 0.82 | 1.64E-01 | transcription_start_site | + | 328451 | 328451 | -1076 | 21940 | AN5378 |
| 2174 | CONTIG93 | 327005 | 327744 | 0.82 | 1.64E-01 | transcription_start_site | + | 328640 | 328640 | -1265 | 21941 | AN5378 |
| 2174 | CONTIG93 | 327005 | 327744 | 0.82 | 1.64E-01 | transcription_start_site | + | 329013 | 329013 | -1638 | 21942 | AN5378 |
| 2174 | CONTIG93 | 327005 | 327744 | 0.82 | 1.64E-01 | transcription_start_site | + | 329141 | 329141 | -1766 | 21943 | AN5378 |
| 2174 | CONTIG93 | 327005 | 327744 | 0.82 | 1.64E-01 | transcription_start_site | + | 329335 | 329335 | -1960 | 21944 | AN5378 |
| 2174 | CONTIG93 | 327005 | 327744 | 0.82 | 1.64E-01 | transcription_start_site | + | 329594 | 329594 | -2219 | 21945 | AN5378 |
| 2174 | CONTIG93 | 327005 | 327744 | 0.82 | 1.64E-01 | transcription_start_site | + | 329703 | 329703 | -2328 | 21946 | AN5378 |
| 1752 | CONTIG94 | 3601   | 3885   | 1.1  | 6.04E-02 | transcription_start_site | - | 1102   | 1102   | -2641 | 21958 | AN5382 |
| 1752 | CONTIG94 | 3601   | 3885   | 1.1  | 6.04E-02 | transcription_start_site | + | 5741   | 5741   | -1998 | 21960 | AN5384 |
| 1752 | CONTIG94 | 3601   | 3885   | 1.1  | 6.04E-02 | transcription_start_site | + | 5838   | 5838   | -2095 | 21961 | AN5384 |
| 1752 | CONTIG94 | 3601   | 3885   | 1.1  | 6.04E-02 | transcription_start_site | + | 8600   | 8600   | -4857 | 21962 | AN5385 |
| 2146 | CONTIG94 | 25294  | 25645  | 0.84 | 1.54E-01 | transcription_start_site | - | 20661  | 20661  | -4808 | 21967 | AN5389 |
| 2146 | CONTIG94 | 25294  | 25645  | 0.84 | 1.54E-01 | transcription_start_site | - | 25394  | 25394  | -75   | 21968 | AN5390 |
| 2146 | CONTIG94 | 25294  | 25645  | 0.84 | 1.54E-01 | transcription_start_site | - | 25293  | 25293  | -176  | 21969 | AN5390 |
| 2146 | CONTIG94 | 25294  | 25645  | 0.84 | 1.54E-01 | transcription_start_site | - | 25082  | 25082  | -387  | 21970 | AN5390 |
| 2146 | CONTIG94 | 25294  | 25645  | 0.84 | 1.54E-01 | transcription_start_site | - | 24537  | 24537  | -932  | 21971 | AN5390 |
| 2146 | CONTIG94 | 25294  | 25645  | 0.84 | 1.54E-01 | transcription_start_site | - | 24020  | 24020  | -1449 | 21972 | AN5390 |
| 2146 | CONTIG94 | 25294  | 25645  | 0.84 | 1.54E-01 | transcription_start_site | - | 22772  | 22772  | -2697 | 21973 | AN5390 |
| 2146 | CONTIG94 | 25294  | 25645  | 0.84 | 1.54E-01 | transcription_start_site | - | 22654  | 22654  | -2815 | 21974 | AN5390 |
| 2146 | CONTIG94 | 25294  | 25645  | 0.84 | 1.54E-01 | transcription_start_site | + | 25934  | 25934  | -464  | 21975 | AN5391 |
| 2146 | CONTIG94 | 25294  | 25645  | 0.84 | 1.54E-01 | transcription_start_site | + | 26020  | 26020  | -550  | 21976 | AN5391 |
| 1420 | CONTIG94 | 52370  | 52644  | 1.33 | 2.63E-02 | transcription_start_site | - | 48132  | 48132  | -4375 | 21995 | AN5398 |
| 1420 | CONTIG94 | 52370  | 52644  | 1.33 | 2.63E-02 | transcription_start_site | - | 52313  | 52313  | -194  | 21996 | AN5399 |
| 1420 | CONTIG94 | 52370  | 52644  | 1.33 | 2.63E-02 | transcription_start_site | - | 51300  | 51300  | -1207 | 21997 | AN5399 |
| 1515 | CONTIG94 | 61520  | 62170  | 1.26 | 3.34E-02 | transcription_start_site | - | 56976  | 56976  | -4869 | 21998 | AN5400 |
| 1515 | CONTIG94 | 61520  | 62170  | 1.26 | 3.34E-02 | transcription_start_site | - | 56661  | 56661  | -5184 | 21999 | AN5400 |
| 1515 | CONTIG94 | 61520  | 62170  | 1.26 | 3.34E-02 | transcription_start_site | - | 56577  | 56577  | -5268 | 22000 | AN5400 |
| 1515 | CONTIG94 | 61520  | 62170  | 1.26 | 3.34E-02 | transcription_start_site | - | 61152  | 61152  | -693  | 22004 | AN5401 |
| 1515 | CONTIG94 | 61520  | 62170  | 1.26 | 3.34E-02 | transcription_start_site | - | 61047  | 61047  | -798  | 22005 | AN5401 |
| 1515 | CONTIG94 | 61520  | 62170  | 1.26 | 3.34E-02 | transcription_start_site | - | 60839  | 60839  | -1006 | 22006 | AN5401 |
| 1513 | CONTIG94 | 71421  | 72057  | 1.26 | 1.61E-02 | transcription_start_site | - | 70750  | 70750  | -989  | 22010 | AN5403 |
| 1513 | CONTIG94 | 71421  | 72057  | 1.26 | 1.61E-02 | transcription_start_site | - | 70517  | 70517  | -1222 | 22011 | AN5403 |
| 1513 | CONTIG94 | 71421  | 72057  | 1.26 | 1.61E-02 | transcription_start_site | - | 70380  | 70380  | -1359 | 22012 | AN5403 |
| 1513 | CONTIG94 | 71421  | 72057  | 1.26 | 1.61E-02 | transcription_start_site | - | 67785  | 67785  | -3954 | 22013 | AN5403 |
| 1513 | CONTIG94 | 71421  | 72057  | 1.26 | 1.61E-02 | transcription_start_site | - | 67438  | 67438  | -4301 | 22014 | AN5403 |
| 1513 | CONTIG94 | 71421  | 72057  | 1.26 | 1.61E-02 | transcription_start_site | + | 72128  | 72128  | -389  | 22015 | AN5404 |
| 1513 | CONTIG94 | 71421  | 72057  | 1.26 | 1.61E-02 | transcription_start_site | + | 72322  | 72322  | -583  | 22016 | AN5404 |
| 1513 | CONTIG94 | 71421  | 72057  | 1.26 | 1.61E-02 | transcription_start_site | + | 72397  | 72397  | -658  | 22017 | AN5404 |
| 1513 | CONTIG94 | 71421  | 72057  | 1.26 | 1.61E-02 | transcription_start_site | + | 72567  | 72567  | -828  | 22018 | AN5404 |

|      |          |        |        |      |          |                          |   |        |        |       |       |        |
|------|----------|--------|--------|------|----------|--------------------------|---|--------|--------|-------|-------|--------|
| 1513 | CONTIG94 | 71421  | 72057  | 1.26 | 1.61E-02 | transcription_start_site | + | 72658  | 72658  | -919  | 22019 | AN5404 |
| 1513 | CONTIG94 | 71421  | 72057  | 1.26 | 1.61E-02 | transcription_start_site | + | 72826  | 72826  | -1087 | 22020 | AN5404 |
| 1513 | CONTIG94 | 71421  | 72057  | 1.26 | 1.61E-02 | transcription_start_site | + | 73085  | 73085  | -1346 | 22021 | AN5404 |
| 1513 | CONTIG94 | 71421  | 72057  | 1.26 | 1.61E-02 | transcription_start_site | + | 76974  | 76974  | -5235 | 22022 | AN5405 |
| 1354 | CONTIG94 | 86193  | 86542  | 1.39 | 2.05E-02 | transcription_start_site | - | 85127  | 85127  | -1240 | 22026 | AN5406 |
| 1354 | CONTIG94 | 86193  | 86542  | 1.39 | 2.05E-02 | transcription_start_site | - | 84989  | 84989  | -1378 | 22027 | AN5406 |
| 1354 | CONTIG94 | 86193  | 86542  | 1.39 | 2.05E-02 | transcription_start_site | - | 84647  | 84647  | -1720 | 22028 | AN5406 |
| 1354 | CONTIG94 | 86193  | 86542  | 1.39 | 2.05E-02 | transcription_start_site | - | 81614  | 81614  | -4753 | 22029 | AN5406 |
| 1354 | CONTIG94 | 86193  | 86542  | 1.39 | 2.05E-02 | transcription_start_site | + | 86989  | 86989  | -621  | 22030 | AN5407 |
| 1354 | CONTIG94 | 86193  | 86542  | 1.39 | 2.05E-02 | transcription_start_site | + | 87392  | 87392  | -1024 | 22031 | AN5407 |
| 1354 | CONTIG94 | 86193  | 86542  | 1.39 | 2.05E-02 | transcription_start_site | + | 88048  | 88048  | -1680 | 22032 | AN5407 |
| 1354 | CONTIG94 | 86193  | 86542  | 1.39 | 2.05E-02 | transcription_start_site | + | 88449  | 88449  | -2081 | 22033 | AN5407 |
| 1354 | CONTIG94 | 86193  | 86542  | 1.39 | 2.05E-02 | transcription_start_site | + | 91318  | 91318  | -4950 | 22034 | AN5408 |
| 2004 | CONTIG94 | 97203  | 97477  | 0.94 | 1.08E-01 | transcription_start_site | - | 94009  | 94009  | -3331 | 22036 | AN5409 |
| 2004 | CONTIG94 | 97203  | 97477  | 0.94 | 1.08E-01 | transcription_start_site | - | 93648  | 93648  | -3692 | 22037 | AN5409 |
| 2004 | CONTIG94 | 97203  | 97477  | 0.94 | 1.08E-01 | transcription_start_site | + | 97476  | 97476  | -136  | 22039 | AN5411 |
| 2004 | CONTIG94 | 97203  | 97477  | 0.94 | 1.08E-01 | transcription_start_site | + | 97760  | 97760  | -420  | 22040 | AN5411 |
| 2004 | CONTIG94 | 97203  | 97477  | 0.94 | 1.08E-01 | transcription_start_site | + | 98764  | 98764  | -1424 | 22041 | AN5412 |
| 2004 | CONTIG94 | 97203  | 97477  | 0.94 | 1.08E-01 | transcription_start_site | + | 99142  | 99142  | -1802 | 22042 | AN5412 |
| 2004 | CONTIG94 | 97203  | 97477  | 0.94 | 1.08E-01 | transcription_start_site | + | 99689  | 99689  | -2349 | 22043 | AN5412 |
| 2218 | CONTIG94 | 116560 | 116848 | 0.78 | 1.97E-01 | transcription_start_site | - | 111827 | 111827 | -4877 | 22054 | AN5417 |
| 2218 | CONTIG94 | 116560 | 116848 | 0.78 | 1.97E-01 | transcription_start_site | - | 116095 | 116095 | -609  | 22059 | AN5419 |
| 2218 | CONTIG94 | 116560 | 116848 | 0.78 | 1.97E-01 | transcription_start_site | - | 115690 | 115690 | -1014 | 22060 | AN5419 |
| 2218 | CONTIG94 | 116560 | 116848 | 0.78 | 1.97E-01 | transcription_start_site | + | 118462 | 118462 | -1758 | 22061 | AN5420 |
| 2218 | CONTIG94 | 116560 | 116848 | 0.78 | 1.97E-01 | transcription_start_site | + | 118756 | 118756 | -2052 | 22062 | AN5420 |
| 2218 | CONTIG94 | 116560 | 116848 | 0.78 | 1.97E-01 | transcription_start_site | + | 119502 | 119502 | -2798 | 22063 | AN5420 |
| 2218 | CONTIG94 | 116560 | 116848 | 0.78 | 1.97E-01 | transcription_start_site | + | 120317 | 120317 | -3613 | 22064 | AN5420 |
| 2218 | CONTIG94 | 116560 | 116848 | 0.78 | 1.97E-01 | transcription_start_site | + | 120575 | 120575 | -3871 | 22065 | AN5420 |
| 2218 | CONTIG94 | 116560 | 116848 | 0.78 | 1.97E-01 | transcription_start_site | + | 120957 | 120957 | -4253 | 22066 | AN5420 |
| 2218 | CONTIG94 | 116560 | 116848 | 0.78 | 1.97E-01 | transcription_start_site | + | 121128 | 121128 | -4424 | 22067 | AN5420 |
| 1241 | CONTIG94 | 180089 | 180580 | 1.49 | 5.38E-03 | transcription_start_site | - | 179279 | 179279 | -1055 | 22125 | AN5438 |
| 1241 | CONTIG94 | 180089 | 180580 | 1.49 | 5.38E-03 | transcription_start_site | - | 178919 | 178919 | -1415 | 22126 | AN5438 |
| 1241 | CONTIG94 | 180089 | 180580 | 1.49 | 5.38E-03 | transcription_start_site | - | 178576 | 178576 | -1758 | 22127 | AN5438 |
| 1241 | CONTIG94 | 180089 | 180580 | 1.49 | 5.38E-03 | transcription_start_site | + | 179715 | 179715 | 619   | 22128 | AN5439 |
| 1241 | CONTIG94 | 180089 | 180580 | 1.49 | 5.38E-03 | transcription_start_site | + | 180621 | 180621 | -286  | 22129 | AN5440 |
| 1241 | CONTIG94 | 180089 | 180580 | 1.49 | 5.38E-03 | transcription_start_site | + | 180794 | 180794 | -459  | 22130 | AN5440 |
| 1241 | CONTIG94 | 180089 | 180580 | 1.49 | 5.38E-03 | transcription_start_site | + | 183708 | 183708 | -3373 | 22131 | AN5441 |
| 1241 | CONTIG94 | 180089 | 180580 | 1.49 | 5.38E-03 | transcription_start_site | + | 183944 | 183944 | -3609 | 22132 | AN5441 |
| 1241 | CONTIG94 | 180089 | 180580 | 1.49 | 5.38E-03 | transcription_start_site | + | 184228 | 184228 | -3893 | 22133 | AN5441 |
| 530  | CONTIG94 | 194628 | 195215 | 2.27 | 0.00E+00 | transcription_start_site | - | 190371 | 190371 | -4550 | 22137 | AN5444 |
| 530  | CONTIG94 | 194628 | 195215 | 2.27 | 0.00E+00 | transcription_start_site | - | 193856 | 193856 | -1065 | 22138 | AN5445 |
| 530  | CONTIG94 | 194628 | 195215 | 2.27 | 0.00E+00 | transcription_start_site | - | 193453 | 193453 | -1468 | 22139 | AN5445 |
| 530  | CONTIG94 | 194628 | 195215 | 2.27 | 0.00E+00 | transcription_start_site | + | 196941 | 196941 | -2019 | 22140 | AN5446 |
| 530  | CONTIG94 | 194628 | 195215 | 2.27 | 0.00E+00 | transcription_start_site | + | 197168 | 197168 | -2246 | 22141 | AN5446 |
| 530  | CONTIG94 | 194628 | 195215 | 2.27 | 0.00E+00 | transcription_start_site | + | 197517 | 197517 | -2595 | 22142 | AN5446 |
| 530  | CONTIG94 | 194628 | 195215 | 2.27 | 0.00E+00 | transcription_start_site | + | 199831 | 199831 | -4909 | 22143 | AN5447 |
| 530  | CONTIG94 | 194628 | 195215 | 2.27 | 0.00E+00 | transcription_start_site | + | 200116 | 200116 | -5194 | 22144 | AN5447 |
| 530  | CONTIG94 | 194628 | 195215 | 2.27 | 0.00E+00 | transcription_start_site | + | 200192 | 200192 | -5270 | 22145 | AN5447 |
| 280  | CONTIG94 | 209195 | 209764 | 2.66 | 0.00E+00 | transcription_start_site | - | 208052 | 208052 | -1427 | 22149 | AN5449 |
| 280  | CONTIG94 | 209195 | 209764 | 2.66 | 0.00E+00 | transcription_start_site | - | 207586 | 207586 | -1893 | 22150 | AN5449 |
| 588  | CONTIG94 | 208205 | 208869 | 2.2  | 2.26E-04 | transcription_start_site | - | 208052 | 208052 | -485  | 22149 | AN5449 |
| 588  | CONTIG94 | 208205 | 208869 | 2.2  | 2.26E-04 | transcription_start_site | - | 207586 | 207586 | -951  | 22150 | AN5449 |
| 280  | CONTIG94 | 209195 | 209764 | 2.66 | 0.00E+00 | transcription_start_site | - | 210541 | 210541 | 1061  | 22155 | AN5450 |
| 1164 | CONTIG94 | 215420 | 215694 | 1.56 | 1.06E-02 | transcription_start_site | - | 212841 | 212841 | -2716 | 22151 | AN5450 |
| 1164 | CONTIG94 | 215420 | 215694 | 1.56 | 1.06E-02 | transcription_start_site | - | 212698 | 212698 | -2859 | 22152 | AN5450 |
| 1164 | CONTIG94 | 215420 | 215694 | 1.56 | 1.06E-02 | transcription_start_site | - | 211326 | 211326 | -4231 | 22153 | AN5450 |
| 1164 | CONTIG94 | 215420 | 215694 | 1.56 | 1.06E-02 | transcription_start_site | - | 210818 | 210818 | -4739 | 22154 | AN5450 |

|      |          |        |        |      |          |                          |   |        |        |       |       |        |
|------|----------|--------|--------|------|----------|--------------------------|---|--------|--------|-------|-------|--------|
| 1164 | CONTIG94 | 215420 | 215694 | 1.56 | 1.06E-02 | transcription_start_site | - | 210541 | 210541 | -5016 | 22155 | AN5450 |
| 1164 | CONTIG94 | 215420 | 215694 | 1.56 | 1.06E-02 | transcription_start_site | - | 215347 | 215347 | -210  | 22156 | AN5451 |
| 1164 | CONTIG94 | 215420 | 215694 | 1.56 | 1.06E-02 | transcription_start_site | - | 214821 | 214821 | -736  | 22157 | AN5451 |
| 1164 | CONTIG94 | 215420 | 215694 | 1.56 | 1.06E-02 | transcription_start_site | + | 216008 | 216008 | -451  | 22158 | AN5452 |
| 1164 | CONTIG94 | 215420 | 215694 | 1.56 | 1.06E-02 | transcription_start_site | + | 216425 | 216425 | -868  | 22159 | AN5452 |
| 1164 | CONTIG94 | 215420 | 215694 | 1.56 | 1.06E-02 | transcription_start_site | + | 218693 | 218693 | -3136 | 22160 | AN5452 |
| 1164 | CONTIG94 | 215420 | 215694 | 1.56 | 1.06E-02 | transcription_start_site | + | 220038 | 220038 | -4481 | 22161 | AN5452 |
| 812  | CONTIG94 | 252767 | 253118 | 1.91 | 2.32E-03 | transcription_start_site | - | 249539 | 249539 | -3403 | 22187 | AN5460 |
| 812  | CONTIG94 | 252767 | 253118 | 1.91 | 2.32E-03 | transcription_start_site | - | 249394 | 249394 | -3548 | 22188 | AN5460 |
| 812  | CONTIG94 | 252767 | 253118 | 1.91 | 2.32E-03 | transcription_start_site | - | 249174 | 249174 | -3768 | 22189 | AN5460 |
| 812  | CONTIG94 | 252767 | 253118 | 1.91 | 2.32E-03 | transcription_start_site | - | 248835 | 248835 | -4107 | 22190 | AN5460 |
| 812  | CONTIG94 | 252767 | 253118 | 1.91 | 2.32E-03 | transcription_start_site | - | 248707 | 248707 | -4235 | 22191 | AN5460 |
| 812  | CONTIG94 | 252767 | 253118 | 1.91 | 2.32E-03 | transcription_start_site | - | 248613 | 248613 | -4329 | 22192 | AN5460 |
| 812  | CONTIG94 | 252767 | 253118 | 1.91 | 2.32E-03 | transcription_start_site | - | 248433 | 248433 | -4509 | 22193 | AN5460 |
| 812  | CONTIG94 | 252767 | 253118 | 1.91 | 2.32E-03 | transcription_start_site | - | 247998 | 247998 | -4944 | 22194 | AN5460 |
| 812  | CONTIG94 | 252767 | 253118 | 1.91 | 2.32E-03 | transcription_start_site | - | 247784 | 247784 | -5158 | 22195 | AN5460 |
| 812  | CONTIG94 | 252767 | 253118 | 1.91 | 2.32E-03 | transcription_start_site | - | 252715 | 252715 | -227  | 22197 | AN5461 |
| 812  | CONTIG94 | 252767 | 253118 | 1.91 | 2.32E-03 | transcription_start_site | + | 254216 | 254216 | -1273 | 22198 | AN5462 |
| 812  | CONTIG94 | 252767 | 253118 | 1.91 | 2.32E-03 | transcription_start_site | + | 254486 | 254486 | -1543 | 22199 | AN5462 |
| 812  | CONTIG94 | 252767 | 253118 | 1.91 | 2.32E-03 | transcription_start_site | + | 256660 | 256660 | -3717 | 22200 | AN5463 |
| 812  | CONTIG94 | 252767 | 253118 | 1.91 | 2.32E-03 | transcription_start_site | + | 256821 | 256821 | -3878 | 22201 | AN5463 |
| 2184 | CONTIG94 | 315469 | 315808 | 0.81 | 1.76E-01 | transcription_start_site | - | 315459 | 315459 | -179  | 22256 | AN5480 |
| 2184 | CONTIG94 | 315469 | 315808 | 0.81 | 1.76E-01 | transcription_start_site | - | 315215 | 315215 | -423  | 22257 | AN5480 |
| 2184 | CONTIG94 | 315469 | 315808 | 0.81 | 1.76E-01 | transcription_start_site | - | 315026 | 315026 | -612  | 22258 | AN5480 |
| 1655 | CONTIG94 | 330317 | 330657 | 1.17 | 4.78E-02 | transcription_start_site | - | 327096 | 327096 | -3391 | 22270 | AN5483 |
| 1655 | CONTIG94 | 330317 | 330657 | 1.17 | 4.78E-02 | transcription_start_site | - | 325763 | 325763 | -4724 | 22271 | AN5483 |
| 1753 | CONTIG94 | 327604 | 329018 | 1.1  | 6.04E-02 | transcription_start_site | - | 327096 | 327096 | -1215 | 22270 | AN5483 |
| 1753 | CONTIG94 | 327604 | 329018 | 1.1  | 6.04E-02 | transcription_start_site | - | 325763 | 325763 | -2548 | 22271 | AN5483 |
| 1753 | CONTIG94 | 327604 | 329018 | 1.1  | 6.04E-02 | transcription_start_site | - | 324923 | 324923 | -3388 | 22272 | AN5483 |
| 2052 | CONTIG94 | 329494 | 330058 | 0.91 | 1.22E-01 | transcription_start_site | - | 327096 | 327096 | -2680 | 22270 | AN5483 |
| 2052 | CONTIG94 | 329494 | 330058 | 0.91 | 1.22E-01 | transcription_start_site | - | 325763 | 325763 | -4013 | 22271 | AN5483 |
| 2052 | CONTIG94 | 329494 | 330058 | 0.91 | 1.22E-01 | transcription_start_site | - | 324923 | 324923 | -4853 | 22272 | AN5483 |
| 1655 | CONTIG94 | 330317 | 330657 | 1.17 | 4.78E-02 | transcription_start_site | + | 329595 | 329595 | 892   | 22275 | AN5484 |
| 1753 | CONTIG94 | 327604 | 329018 | 1.1  | 6.04E-02 | transcription_start_site | + | 329235 | 329235 | -924  | 22273 | AN5484 |
| 1753 | CONTIG94 | 327604 | 329018 | 1.1  | 6.04E-02 | transcription_start_site | + | 329312 | 329312 | -1001 | 22274 | AN5484 |
| 1753 | CONTIG94 | 327604 | 329018 | 1.1  | 6.04E-02 | transcription_start_site | + | 329595 | 329595 | -1284 | 22275 | AN5484 |
| 2052 | CONTIG94 | 329494 | 330058 | 0.91 | 1.22E-01 | transcription_start_site | + | 329595 | 329595 | 181   | 22275 | AN5484 |
| 2052 | CONTIG94 | 329494 | 330058 | 0.91 | 1.22E-01 | transcription_start_site | + | 329312 | 329312 | 464   | 22274 | AN5484 |
| 2052 | CONTIG94 | 329494 | 330058 | 0.91 | 1.22E-01 | transcription_start_site | + | 329235 | 329235 | 541   | 22273 | AN5484 |
| 1655 | CONTIG94 | 330317 | 330657 | 1.17 | 4.78E-02 | transcription_start_site | + | 331322 | 331322 | -835  | 22276 | AN5485 |
| 1655 | CONTIG94 | 330317 | 330657 | 1.17 | 4.78E-02 | transcription_start_site | + | 331615 | 331615 | -1128 | 22277 | AN5485 |
| 1753 | CONTIG94 | 327604 | 329018 | 1.1  | 6.04E-02 | transcription_start_site | + | 331322 | 331322 | -3011 | 22276 | AN5485 |
| 1753 | CONTIG94 | 327604 | 329018 | 1.1  | 6.04E-02 | transcription_start_site | + | 331615 | 331615 | -3304 | 22277 | AN5485 |
| 2052 | CONTIG94 | 329494 | 330058 | 0.91 | 1.22E-01 | transcription_start_site | + | 331322 | 331322 | -1546 | 22276 | AN5485 |
| 2052 | CONTIG94 | 329494 | 330058 | 0.91 | 1.22E-01 | transcription_start_site | + | 331615 | 331615 | -1839 | 22277 | AN5485 |
| 281  | CONTIG94 | 355071 | 355550 | 2.66 | 0.00E+00 | transcription_start_site | - | 350844 | 350844 | -4466 | 22282 | AN5488 |
| 532  | CONTIG94 | 352141 | 352475 | 2.27 | 2.69E-04 | transcription_start_site | - | 350844 | 350844 | -1464 | 22282 | AN5488 |
| 532  | CONTIG94 | 352141 | 352475 | 2.27 | 2.69E-04 | transcription_start_site | - | 348869 | 348869 | -3439 | 22283 | AN5488 |
| 532  | CONTIG94 | 352141 | 352475 | 2.27 | 2.69E-04 | transcription_start_site | - | 348224 | 348224 | -4084 | 22284 | AN5488 |
| 532  | CONTIG94 | 352141 | 352475 | 2.27 | 2.69E-04 | transcription_start_site | - | 347953 | 347953 | -4355 | 22285 | AN5488 |
| 532  | CONTIG94 | 352141 | 352475 | 2.27 | 2.69E-04 | transcription_start_site | - | 347867 | 347867 | -4441 | 22286 | AN5488 |
| 677  | CONTIG94 | 351151 | 351595 | 2.07 | 8.43E-04 | transcription_start_site | - | 350844 | 350844 | -529  | 22282 | AN5488 |
| 677  | CONTIG94 | 351151 | 351595 | 2.07 | 8.43E-04 | transcription_start_site | - | 348869 | 348869 | -2504 | 22283 | AN5488 |
| 677  | CONTIG94 | 351151 | 351595 | 2.07 | 8.43E-04 | transcription_start_site | - | 348224 | 348224 | -3149 | 22284 | AN5488 |
| 677  | CONTIG94 | 351151 | 351595 | 2.07 | 8.43E-04 | transcription_start_site | - | 347953 | 347953 | -3420 | 22285 | AN5488 |
| 677  | CONTIG94 | 351151 | 351595 | 2.07 | 8.43E-04 | transcription_start_site | - | 347867 | 347867 | -3506 | 22286 | AN5488 |
| 677  | CONTIG94 | 351151 | 351595 | 2.07 | 8.43E-04 | transcription_start_site | - | 346939 | 346939 | -4434 | 22287 | AN5488 |



|      |          |        |        |      |          |                          |   |        |        |       |       |        |
|------|----------|--------|--------|------|----------|--------------------------|---|--------|--------|-------|-------|--------|
| 677  | CONTIG94 | 351151 | 351595 | 2.07 | 8.43E-04 | transcription_start_site | - | 346635 | 346635 | -4738 | 22288 | AN5488 |
| 281  | CONTIG94 | 355071 | 355550 | 2.66 | 0.00E+00 | transcription_start_site | + | 355655 | 355655 | -344  | 22295 | AN5489 |
| 532  | CONTIG94 | 352141 | 352475 | 2.27 | 2.69E-04 | transcription_start_site | + | 355655 | 355655 | -3347 | 22295 | AN5489 |
| 677  | CONTIG94 | 351151 | 351595 | 2.07 | 8.43E-04 | transcription_start_site | + | 355655 | 355655 | -4282 | 22295 | AN5489 |
| 260  | CONTIG94 | 369844 | 370553 | 2.69 | 0.00E+00 | transcription_start_site | - | 367310 | 367310 | -2888 | 22299 | AN5491 |
| 260  | CONTIG94 | 369844 | 370553 | 2.69 | 0.00E+00 | transcription_start_site | - | 367065 | 367065 | -3133 | 22300 | AN5491 |
| 260  | CONTIG94 | 369844 | 370553 | 2.69 | 0.00E+00 | transcription_start_site | - | 369698 | 369698 | -500  | 22302 | AN5492 |
| 260  | CONTIG94 | 369844 | 370553 | 2.69 | 0.00E+00 | transcription_start_site | - | 369517 | 369517 | -681  | 22303 | AN5492 |
| 260  | CONTIG94 | 369844 | 370553 | 2.69 | 0.00E+00 | transcription_start_site | + | 371333 | 371333 | -1134 | 22304 | AN5493 |
| 260  | CONTIG94 | 369844 | 370553 | 2.69 | 0.00E+00 | transcription_start_site | + | 371719 | 371719 | -1520 | 22305 | AN5493 |
| 260  | CONTIG94 | 369844 | 370553 | 2.69 | 0.00E+00 | transcription_start_site | + | 373031 | 373031 | -2832 | 22306 | AN5493 |
| 1421 | CONTIG94 | 392335 | 392762 | 1.33 | 2.63E-02 | transcription_start_site | + | 392816 | 392816 | -267  | 22325 | AN5501 |
| 1421 | CONTIG94 | 392335 | 392762 | 1.33 | 2.63E-02 | transcription_start_site | + | 393892 | 393892 | -1343 | 22326 | AN5501 |
| 1421 | CONTIG94 | 392335 | 392762 | 1.33 | 2.63E-02 | transcription_start_site | + | 394063 | 394063 | -1514 | 22327 | AN5501 |
| 1421 | CONTIG94 | 392335 | 392762 | 1.33 | 2.63E-02 | transcription_start_site | + | 394139 | 394139 | -1590 | 22328 | AN5501 |
| 1421 | CONTIG94 | 392335 | 392762 | 1.33 | 2.63E-02 | transcription_start_site | + | 395820 | 395820 | -3271 | 22329 | AN5502 |
| 1421 | CONTIG94 | 392335 | 392762 | 1.33 | 2.63E-02 | transcription_start_site | + | 396540 | 396540 | -3991 | 22330 | AN5502 |
| 1421 | CONTIG94 | 392335 | 392762 | 1.33 | 2.63E-02 | transcription_start_site | + | 396936 | 396936 | -4387 | 22331 | AN5502 |
| 1421 | CONTIG94 | 392335 | 392762 | 1.33 | 2.63E-02 | transcription_start_site | + | 397245 | 397245 | -4696 | 22332 | AN5502 |
| 2185 | CONTIG94 | 414682 | 415256 | 0.81 | 1.76E-01 | transcription_start_site | - | 412071 | 412071 | -2898 | 22347 | AN5507 |
| 2185 | CONTIG94 | 414682 | 415256 | 0.81 | 1.76E-01 | transcription_start_site | - | 411888 | 411888 | -3081 | 22348 | AN5507 |
| 2185 | CONTIG94 | 414682 | 415256 | 0.81 | 1.76E-01 | transcription_start_site | - | 411300 | 411300 | -3669 | 22349 | AN5507 |
| 2185 | CONTIG94 | 414682 | 415256 | 0.81 | 1.76E-01 | transcription_start_site | - | 411081 | 411081 | -3888 | 22350 | AN5507 |
| 2185 | CONTIG94 | 414682 | 415256 | 0.81 | 1.76E-01 | transcription_start_site | - | 410639 | 410639 | -4330 | 22351 | AN5507 |
| 2185 | CONTIG94 | 414682 | 415256 | 0.81 | 1.76E-01 | transcription_start_site | - | 410455 | 410455 | -4514 | 22352 | AN5507 |
| 2185 | CONTIG94 | 414682 | 415256 | 0.81 | 1.76E-01 | transcription_start_site | + | 416564 | 416564 | -1595 | 22353 | AN5508 |
| 2185 | CONTIG94 | 414682 | 415256 | 0.81 | 1.76E-01 | transcription_start_site | + | 416849 | 416849 | -1880 | 22354 | AN5508 |
| 2185 | CONTIG94 | 414682 | 415256 | 0.81 | 1.76E-01 | transcription_start_site | + | 417058 | 417058 | -2089 | 22355 | AN5508 |
| 2185 | CONTIG94 | 414682 | 415256 | 0.81 | 1.76E-01 | transcription_start_site | + | 417250 | 417250 | -2281 | 22356 | AN5508 |
| 2185 | CONTIG94 | 414682 | 415256 | 0.81 | 1.76E-01 | transcription_start_site | + | 417942 | 417942 | -2973 | 22357 | AN5508 |
| 963  | CONTIG94 | 442818 | 443244 | 1.75 | 5.08E-03 | transcription_start_site | - | 438576 | 438576 | -4455 | 22371 | AN5514 |
| 963  | CONTIG94 | 442818 | 443244 | 1.75 | 5.08E-03 | transcription_start_site | - | 438216 | 438216 | -4815 | 22372 | AN5514 |
| 963  | CONTIG94 | 442818 | 443244 | 1.75 | 5.08E-03 | transcription_start_site | - | 437998 | 437998 | -5033 | 22373 | AN5514 |
| 1244 | CONTIG94 | 440703 | 441069 | 1.49 | 1.37E-02 | transcription_start_site | - | 438576 | 438576 | -2310 | 22371 | AN5514 |
| 1244 | CONTIG94 | 440703 | 441069 | 1.49 | 1.37E-02 | transcription_start_site | - | 438216 | 438216 | -2670 | 22372 | AN5514 |
| 1244 | CONTIG94 | 440703 | 441069 | 1.49 | 1.37E-02 | transcription_start_site | - | 437998 | 437998 | -2888 | 22373 | AN5514 |
| 1244 | CONTIG94 | 440703 | 441069 | 1.49 | 1.37E-02 | transcription_start_site | - | 436944 | 436944 | -3942 | 22374 | AN5514 |
| 1244 | CONTIG94 | 440703 | 441069 | 1.49 | 1.37E-02 | transcription_start_site | - | 436713 | 436713 | -4173 | 22375 | AN5514 |
| 1244 | CONTIG94 | 440703 | 441069 | 1.49 | 1.37E-02 | transcription_start_site | - | 436533 | 436533 | -4353 | 22376 | AN5514 |
| 1244 | CONTIG94 | 440703 | 441069 | 1.49 | 1.37E-02 | transcription_start_site | - | 435977 | 435977 | -4909 | 22377 | AN5514 |
| 707  | CONTIG94 | 451363 | 451927 | 2.04 | 1.09E-03 | transcription_start_site | - | 450434 | 450434 | -1211 | 22383 | AN5516 |
| 707  | CONTIG94 | 451363 | 451927 | 2.04 | 1.09E-03 | transcription_start_site | - | 450163 | 450163 | -1482 | 22384 | AN5516 |
| 707  | CONTIG94 | 451363 | 451927 | 2.04 | 1.09E-03 | transcription_start_site | - | 450084 | 450084 | -1561 | 22385 | AN5516 |
| 707  | CONTIG94 | 451363 | 451927 | 2.04 | 1.09E-03 | transcription_start_site | - | 449822 | 449822 | -1823 | 22386 | AN5516 |
| 707  | CONTIG94 | 451363 | 451927 | 2.04 | 1.09E-03 | transcription_start_site | - | 449494 | 449494 | -2151 | 22387 | AN5516 |
| 707  | CONTIG94 | 451363 | 451927 | 2.04 | 1.09E-03 | transcription_start_site | - | 449287 | 449287 | -2358 | 22388 | AN5516 |
| 707  | CONTIG94 | 451363 | 451927 | 2.04 | 1.09E-03 | transcription_start_site | - | 449054 | 449054 | -2591 | 22389 | AN5516 |
| 707  | CONTIG94 | 451363 | 451927 | 2.04 | 1.09E-03 | transcription_start_site | - | 448931 | 448931 | -2714 | 22390 | AN5516 |
| 707  | CONTIG94 | 451363 | 451927 | 2.04 | 1.09E-03 | transcription_start_site | - | 448654 | 448654 | -2991 | 22391 | AN5516 |
| 707  | CONTIG94 | 451363 | 451927 | 2.04 | 1.09E-03 | transcription_start_site | - | 448375 | 448375 | -3270 | 22392 | AN5516 |
| 707  | CONTIG94 | 451363 | 451927 | 2.04 | 1.09E-03 | transcription_start_site | - | 448134 | 448134 | -3511 | 22393 | AN5516 |
| 707  | CONTIG94 | 451363 | 451927 | 2.04 | 1.09E-03 | transcription_start_site | + | 452495 | 452495 | -850  | 22394 | AN5517 |
| 707  | CONTIG94 | 451363 | 451927 | 2.04 | 1.09E-03 | transcription_start_site | + | 452842 | 452842 | -1197 | 22395 | AN5517 |
| 707  | CONTIG94 | 451363 | 451927 | 2.04 | 1.09E-03 | transcription_start_site | + | 455605 | 455605 | -3960 | 22396 | AN5517 |
| 1277 | CONTIG94 | 468752 | 469116 | 1.46 | 1.54E-02 | transcription_start_site | - | 463929 | 463929 | -5005 | 22405 | AN5521 |
| 1277 | CONTIG94 | 468752 | 469116 | 1.46 | 1.54E-02 | transcription_start_site | - | 463799 | 463799 | -5135 | 22406 | AN5521 |
| 1277 | CONTIG94 | 468752 | 469116 | 1.46 | 1.54E-02 | transcription_start_site | - | 465470 | 465470 | -3464 | 22409 | AN5522 |

|      |          |        |        |      |          |                          |   |        |        |       |       |        |
|------|----------|--------|--------|------|----------|--------------------------|---|--------|--------|-------|-------|--------|
| 1277 | CONTIG94 | 468752 | 469116 | 1.46 | 1.54E-02 | transcription_start_site | - | 468355 | 468355 | -579  | 22410 | AN5523 |
| 1277 | CONTIG94 | 468752 | 469116 | 1.46 | 1.54E-02 | transcription_start_site | - | 467988 | 467988 | -946  | 22411 | AN5523 |
| 1277 | CONTIG94 | 468752 | 469116 | 1.46 | 1.54E-02 | transcription_start_site | - | 467560 | 467560 | -1374 | 22412 | AN5523 |
| 1277 | CONTIG94 | 468752 | 469116 | 1.46 | 1.54E-02 | transcription_start_site | - | 467141 | 467141 | -1793 | 22413 | AN5523 |
| 1277 | CONTIG94 | 468752 | 469116 | 1.46 | 1.54E-02 | transcription_start_site | - | 466746 | 466746 | -2188 | 22414 | AN5523 |
| 797  | CONTIG94 | 474157 | 474726 | 1.94 | 1.77E-03 | transcription_start_site | - | 470334 | 470334 | -4107 | 22415 | AN5524 |
| 797  | CONTIG94 | 474157 | 474726 | 1.94 | 1.77E-03 | transcription_start_site | - | 470135 | 470135 | -4306 | 22416 | AN5524 |
| 797  | CONTIG94 | 474157 | 474726 | 1.94 | 1.77E-03 | transcription_start_site | - | 470066 | 470066 | -4375 | 22417 | AN5524 |
| 797  | CONTIG94 | 474157 | 474726 | 1.94 | 1.77E-03 | transcription_start_site | - | 469643 | 469643 | -4798 | 22418 | AN5524 |
| 1277 | CONTIG94 | 468752 | 469116 | 1.46 | 1.54E-02 | transcription_start_site | - | 469643 | 469643 | 709   | 22418 | AN5524 |
| 1277 | CONTIG94 | 468752 | 469116 | 1.46 | 1.54E-02 | transcription_start_site | - | 470066 | 470066 | 1132  | 22417 | AN5524 |
| 797  | CONTIG94 | 474157 | 474726 | 1.94 | 1.77E-03 | transcription_start_site | - | 473810 | 473810 | -631  | 22419 | AN5525 |
| 797  | CONTIG94 | 474157 | 474726 | 1.94 | 1.77E-03 | transcription_start_site | - | 473646 | 473646 | -795  | 22420 | AN5525 |
| 797  | CONTIG94 | 474157 | 474726 | 1.94 | 1.77E-03 | transcription_start_site | - | 473554 | 473554 | -887  | 22421 | AN5525 |
| 797  | CONTIG94 | 474157 | 474726 | 1.94 | 1.77E-03 | transcription_start_site | - | 473385 | 473385 | -1056 | 22422 | AN5525 |
| 797  | CONTIG94 | 474157 | 474726 | 1.94 | 1.77E-03 | transcription_start_site | - | 473275 | 473275 | -1166 | 22423 | AN5525 |
| 797  | CONTIG94 | 474157 | 474726 | 1.94 | 1.77E-03 | transcription_start_site | - | 472612 | 472612 | -1829 | 22424 | AN5525 |
| 797  | CONTIG94 | 474157 | 474726 | 1.94 | 1.77E-03 | transcription_start_site | - | 471207 | 471207 | -3234 | 22425 | AN5525 |
| 797  | CONTIG94 | 474157 | 474726 | 1.94 | 1.77E-03 | transcription_start_site | + | 475023 | 475023 | -581  | 22426 | AN5526 |
| 797  | CONTIG94 | 474157 | 474726 | 1.94 | 1.77E-03 | transcription_start_site | + | 475129 | 475129 | -687  | 22427 | AN5526 |
| 797  | CONTIG94 | 474157 | 474726 | 1.94 | 1.77E-03 | transcription_start_site | + | 475377 | 475377 | -935  | 22428 | AN5526 |
| 1678 | CONTIG95 | 40818  | 41326  | 1.15 | 6.50E-02 | transcription_start_site | - | 40907  | 40907  | -165  | 22496 | AN5553 |
| 1678 | CONTIG95 | 40818  | 41326  | 1.15 | 6.50E-02 | transcription_start_site | - | 40270  | 40270  | -802  | 22497 | AN5553 |
| 1678 | CONTIG95 | 40818  | 41326  | 1.15 | 6.50E-02 | transcription_start_site | - | 39612  | 39612  | -1460 | 22498 | AN5553 |
| 84   | CONTIG95 | 72246  | 72595  | 3.13 | 0.00E+00 | transcription_start_site | - | 71963  | 71963  | -457  | 22516 | AN5563 |
| 84   | CONTIG95 | 72246  | 72595  | 3.13 | 0.00E+00 | transcription_start_site | - | 71497  | 71497  | -923  | 22517 | AN5563 |
| 354  | CONTIG95 | 74936  | 75438  | 2.53 | 8.43E-04 | transcription_start_site | - | 71963  | 71963  | -3224 | 22516 | AN5563 |
| 354  | CONTIG95 | 74936  | 75438  | 2.53 | 8.43E-04 | transcription_start_site | - | 71497  | 71497  | -3690 | 22517 | AN5563 |
| 1229 | CONTIG95 | 70281  | 70710  | 1.5  | 1.83E-02 | transcription_start_site | - | 71497  | 71497  | 1001  | 22517 | AN5563 |
| 1681 | CONTIG95 | 70746  | 71750  | 1.15 | 1.08E-01 | transcription_start_site | - | 71497  | 71497  | 249   | 22517 | AN5563 |
| 1681 | CONTIG95 | 70746  | 71750  | 1.15 | 1.08E-01 | transcription_start_site | - | 71963  | 71963  | 715   | 22516 | AN5563 |
| 1807 | CONTIG95 | 73651  | 74005  | 1.07 | 1.38E-01 | transcription_start_site | - | 71963  | 71963  | -1865 | 22516 | AN5563 |
| 1807 | CONTIG95 | 73651  | 74005  | 1.07 | 1.38E-01 | transcription_start_site | - | 71497  | 71497  | -2331 | 22517 | AN5563 |
| 84   | CONTIG95 | 72246  | 72595  | 3.13 | 0.00E+00 | transcription_start_site | + | 73248  | 73248  | -827  | 22518 | AN5564 |
| 1229 | CONTIG95 | 70281  | 70710  | 1.5  | 1.83E-02 | transcription_start_site | + | 73248  | 73248  | -2752 | 22518 | AN5564 |
| 1681 | CONTIG95 | 70746  | 71750  | 1.15 | 1.08E-01 | transcription_start_site | + | 73248  | 73248  | -2000 | 22518 | AN5564 |
| 1807 | CONTIG95 | 73651  | 74005  | 1.07 | 1.38E-01 | transcription_start_site | + | 73248  | 73248  | 580   | 22518 | AN5564 |
| 84   | CONTIG95 | 72246  | 72595  | 3.13 | 0.00E+00 | transcription_start_site | + | 76227  | 76227  | -3806 | 22519 | AN5565 |
| 84   | CONTIG95 | 72246  | 72595  | 3.13 | 0.00E+00 | transcription_start_site | + | 76329  | 76329  | -3908 | 22520 | AN5565 |
| 354  | CONTIG95 | 74936  | 75438  | 2.53 | 8.43E-04 | transcription_start_site | + | 76227  | 76227  | -1040 | 22519 | AN5565 |
| 354  | CONTIG95 | 74936  | 75438  | 2.53 | 8.43E-04 | transcription_start_site | + | 76329  | 76329  | -1142 | 22520 | AN5565 |
| 1681 | CONTIG95 | 70746  | 71750  | 1.15 | 1.08E-01 | transcription_start_site | + | 76227  | 76227  | -4979 | 22519 | AN5565 |
| 1681 | CONTIG95 | 70746  | 71750  | 1.15 | 1.08E-01 | transcription_start_site | + | 76329  | 76329  | -5081 | 22520 | AN5565 |
| 1807 | CONTIG95 | 73651  | 74005  | 1.07 | 1.38E-01 | transcription_start_site | + | 76227  | 76227  | -2399 | 22519 | AN5565 |
| 1807 | CONTIG95 | 73651  | 74005  | 1.07 | 1.38E-01 | transcription_start_site | + | 76329  | 76329  | -2501 | 22520 | AN5565 |
| 354  | CONTIG95 | 74936  | 75438  | 2.53 | 8.43E-04 | transcription_start_site | + | 79641  | 79641  | -4454 | 22521 | AN5566 |
| 354  | CONTIG95 | 74936  | 75438  | 2.53 | 8.43E-04 | transcription_start_site | + | 79758  | 79758  | -4571 | 22522 | AN5566 |
| 354  | CONTIG95 | 74936  | 75438  | 2.53 | 8.43E-04 | transcription_start_site | + | 80294  | 80294  | -5107 | 22523 | AN5566 |
| 310  | CONTIG95 | 85668  | 86162  | 2.61 | 0.00E+00 | transcription_start_site | + | 87440  | 87440  | -1525 | 22527 | AN5568 |
| 310  | CONTIG95 | 85668  | 86162  | 2.61 | 0.00E+00 | transcription_start_site | + | 87739  | 87739  | -1824 | 22528 | AN5568 |
| 310  | CONTIG95 | 85668  | 86162  | 2.61 | 0.00E+00 | transcription_start_site | + | 88115  | 88115  | -2200 | 22529 | AN5568 |
| 608  | CONTIG95 | 86268  | 86845  | 2.18 | 4.57E-03 | transcription_start_site | + | 87440  | 87440  | -883  | 22527 | AN5568 |
| 608  | CONTIG95 | 86268  | 86845  | 2.18 | 4.57E-03 | transcription_start_site | + | 87739  | 87739  | -1182 | 22528 | AN5568 |
| 608  | CONTIG95 | 86268  | 86845  | 2.18 | 4.57E-03 | transcription_start_site | + | 88115  | 88115  | -1558 | 22529 | AN5568 |
| 310  | CONTIG95 | 85668  | 86162  | 2.61 | 0.00E+00 | transcription_start_site | + | 90143  | 90143  | -4228 | 22530 | AN5569 |
| 310  | CONTIG95 | 85668  | 86162  | 2.61 | 0.00E+00 | transcription_start_site | + | 90337  | 90337  | -4422 | 22531 | AN5569 |
| 608  | CONTIG95 | 86268  | 86845  | 2.18 | 4.57E-03 | transcription_start_site | + | 90143  | 90143  | -3586 | 22530 | AN5569 |

|      |          |        |        |      |          |                          |   |       |       |       |       |        |
|------|----------|--------|--------|------|----------|--------------------------|---|-------|-------|-------|-------|--------|
| 608  | CONTIG95 | 86268  | 86845  | 2.18 | 4.57E-03 | transcription_start_site | + | 90337 | 90337 | -3780 | 22531 | AN5569 |
| 1936 | CONTIG95 | 100065 | 100340 | 0.99 | 1.76E-01 | transcription_start_site | - | 95652 | 95652 | -4550 | 22532 | AN5570 |
| 1936 | CONTIG95 | 100065 | 100340 | 0.99 | 1.76E-01 | transcription_start_site | - | 95201 | 95201 | -5001 | 22533 | AN5570 |
| 1936 | CONTIG95 | 100065 | 100340 | 0.99 | 1.76E-01 | transcription_start_site | - | 99584 | 99584 | -618  | 22540 | AN5571 |
| 1936 | CONTIG95 | 100065 | 100340 | 0.99 | 1.76E-01 | transcription_start_site | - | 99329 | 99329 | -873  | 22541 | AN5571 |
| 1936 | CONTIG95 | 100065 | 100340 | 0.99 | 1.76E-01 | transcription_start_site | - | 97235 | 97235 | -2967 | 22542 | AN5571 |
| 1936 | CONTIG95 | 100065 | 100340 | 0.99 | 1.76E-01 | transcription_start_site | - | 96812 | 96812 | -3390 | 22543 | AN5571 |
| 391  | CONTIG96 | 8036   | 8320   | 2.46 | 5.08E-03 | transcription_start_site | - | 4471  | 4471  | -3707 | 22545 | AN5573 |
| 699  | CONTIG96 | 4656   | 5155   | 2.05 | 1.54E-02 | transcription_start_site | - | 4471  | 4471  | -434  | 22545 | AN5573 |
| 391  | CONTIG96 | 8036   | 8320   | 2.46 | 5.08E-03 | transcription_start_site | + | 7329  | 7329  | 849   | 22549 | AN5574 |
| 699  | CONTIG96 | 4656   | 5155   | 2.05 | 1.54E-02 | transcription_start_site | + | 6566  | 6566  | -1660 | 22546 | AN5574 |
| 699  | CONTIG96 | 4656   | 5155   | 2.05 | 1.54E-02 | transcription_start_site | + | 6674  | 6674  | -1768 | 22547 | AN5574 |
| 699  | CONTIG96 | 4656   | 5155   | 2.05 | 1.54E-02 | transcription_start_site | + | 7004  | 7004  | -2098 | 22548 | AN5574 |
| 699  | CONTIG96 | 4656   | 5155   | 2.05 | 1.54E-02 | transcription_start_site | + | 7329  | 7329  | -2423 | 22549 | AN5574 |
| 1382 | CONTIG96 | 1581   | 2020   | 1.37 | 9.60E-02 | transcription_start_site | + | 6566  | 6566  | -4765 | 22546 | AN5574 |
| 1382 | CONTIG96 | 1581   | 2020   | 1.37 | 9.60E-02 | transcription_start_site | + | 6674  | 6674  | -4873 | 22547 | AN5574 |
| 1382 | CONTIG96 | 1581   | 2020   | 1.37 | 9.60E-02 | transcription_start_site | + | 7004  | 7004  | -5203 | 22548 | AN5574 |
| 391  | CONTIG96 | 8036   | 8320   | 2.46 | 5.08E-03 | transcription_start_site | + | 9581  | 9581  | -1403 | 22550 | AN5575 |
| 391  | CONTIG96 | 8036   | 8320   | 2.46 | 5.08E-03 | transcription_start_site | + | 9667  | 9667  | -1489 | 22551 | AN5575 |
| 391  | CONTIG96 | 8036   | 8320   | 2.46 | 5.08E-03 | transcription_start_site | + | 9820  | 9820  | -1642 | 22552 | AN5575 |
| 699  | CONTIG96 | 4656   | 5155   | 2.05 | 1.54E-02 | transcription_start_site | + | 9581  | 9581  | -4675 | 22550 | AN5575 |
| 699  | CONTIG96 | 4656   | 5155   | 2.05 | 1.54E-02 | transcription_start_site | + | 9667  | 9667  | -4761 | 22551 | AN5575 |
| 699  | CONTIG96 | 4656   | 5155   | 2.05 | 1.54E-02 | transcription_start_site | + | 9820  | 9820  | -4914 | 22552 | AN5575 |
| 700  | CONTIG96 | 15315  | 15741  | 2.05 | 1.54E-02 | transcription_start_site | - | 15257 | 15257 | -271  | 22553 | AN5576 |
| 700  | CONTIG96 | 15315  | 15741  | 2.05 | 1.54E-02 | transcription_start_site | - | 14903 | 14903 | -625  | 22554 | AN5576 |
| 700  | CONTIG96 | 15315  | 15741  | 2.05 | 1.54E-02 | transcription_start_site | - | 15857 | 15857 | 329   | 22558 | AN5577 |
| 700  | CONTIG96 | 15315  | 15741  | 2.05 | 1.54E-02 | transcription_start_site | - | 15976 | 15976 | 448   | 22557 | AN5577 |
| 700  | CONTIG96 | 15315  | 15741  | 2.05 | 1.54E-02 | transcription_start_site | - | 16447 | 16447 | 919   | 22556 | AN5577 |
| 700  | CONTIG96 | 15315  | 15741  | 2.05 | 1.54E-02 | transcription_start_site | - | 16620 | 16620 | 1092  | 22555 | AN5577 |
| 700  | CONTIG96 | 15315  | 15741  | 2.05 | 1.54E-02 | transcription_start_site | + | 16871 | 16871 | -1343 | 22559 | AN5578 |
| 1561 | CONTIG96 | 12470  | 12741  | 1.23 | 1.38E-01 | transcription_start_site | + | 16871 | 16871 | -4265 | 22559 | AN5578 |
| 869  | CONTIG96 | 32030  | 32304  | 1.87 | 2.63E-02 | transcription_start_site | - | 29618 | 29618 | -2549 | 22560 | AN5579 |
| 994  | CONTIG96 | 30170  | 30434  | 1.73 | 3.70E-02 | transcription_start_site | - | 29618 | 29618 | -684  | 22560 | AN5579 |
| 869  | CONTIG96 | 32030  | 32304  | 1.87 | 2.63E-02 | transcription_start_site | + | 31338 | 31338 | 829   | 22567 | AN5580 |
| 869  | CONTIG96 | 32030  | 32304  | 1.87 | 2.63E-02 | transcription_start_site | + | 31044 | 31044 | 1123  | 22566 | AN5580 |
| 994  | CONTIG96 | 30170  | 30434  | 1.73 | 3.70E-02 | transcription_start_site | + | 30598 | 30598 | -296  | 22564 | AN5580 |
| 994  | CONTIG96 | 30170  | 30434  | 1.73 | 3.70E-02 | transcription_start_site | + | 30896 | 30896 | -594  | 22565 | AN5580 |
| 994  | CONTIG96 | 30170  | 30434  | 1.73 | 3.70E-02 | transcription_start_site | + | 31044 | 31044 | -742  | 22566 | AN5580 |
| 994  | CONTIG96 | 30170  | 30434  | 1.73 | 3.70E-02 | transcription_start_site | + | 31338 | 31338 | -1036 | 22567 | AN5580 |
| 869  | CONTIG96 | 32030  | 32304  | 1.87 | 2.63E-02 | transcription_start_site | + | 32473 | 32473 | -306  | 22568 | AN5581 |
| 869  | CONTIG96 | 32030  | 32304  | 1.87 | 2.63E-02 | transcription_start_site | + | 32961 | 32961 | -794  | 22569 | AN5581 |
| 994  | CONTIG96 | 30170  | 30434  | 1.73 | 3.70E-02 | transcription_start_site | + | 32473 | 32473 | -2171 | 22568 | AN5581 |
| 994  | CONTIG96 | 30170  | 30434  | 1.73 | 3.70E-02 | transcription_start_site | + | 32961 | 32961 | -2659 | 22569 | AN5581 |
| 342  | CONTIG96 | 36621  | 37195  | 2.55 | 1.53E-03 | transcription_start_site | + | 36974 | 36974 | -66   | 22574 | AN5582 |
| 342  | CONTIG96 | 36621  | 37195  | 2.55 | 1.53E-03 | transcription_start_site | + | 36561 | 36561 | 347   | 22573 | AN5582 |
| 342  | CONTIG96 | 36621  | 37195  | 2.55 | 1.53E-03 | transcription_start_site | + | 36481 | 36481 | 427   | 22572 | AN5582 |
| 342  | CONTIG96 | 36621  | 37195  | 2.55 | 1.53E-03 | transcription_start_site | + | 35951 | 35951 | 957   | 22571 | AN5582 |
| 342  | CONTIG96 | 36621  | 37195  | 2.55 | 1.53E-03 | transcription_start_site | + | 35624 | 35624 | 1284  | 22570 | AN5582 |
| 869  | CONTIG96 | 32030  | 32304  | 1.87 | 2.63E-02 | transcription_start_site | + | 35624 | 35624 | -3457 | 22570 | AN5582 |
| 869  | CONTIG96 | 32030  | 32304  | 1.87 | 2.63E-02 | transcription_start_site | + | 35951 | 35951 | -3784 | 22571 | AN5582 |
| 869  | CONTIG96 | 32030  | 32304  | 1.87 | 2.63E-02 | transcription_start_site | + | 36481 | 36481 | -4314 | 22572 | AN5582 |
| 869  | CONTIG96 | 32030  | 32304  | 1.87 | 2.63E-02 | transcription_start_site | + | 36561 | 36561 | -4394 | 22573 | AN5582 |
| 869  | CONTIG96 | 32030  | 32304  | 1.87 | 2.63E-02 | transcription_start_site | + | 36974 | 36974 | -4807 | 22574 | AN5582 |
| 526  | CONTIG96 | 41646  | 42657  | 2.28 | 9.32E-03 | transcription_start_site | - | 41205 | 41205 | -946  | 22575 | AN5583 |
| 526  | CONTIG96 | 41646  | 42657  | 2.28 | 9.32E-03 | transcription_start_site | - | 41097 | 41097 | -1054 | 22576 | AN5583 |
| 526  | CONTIG96 | 41646  | 42657  | 2.28 | 9.32E-03 | transcription_start_site | - | 40850 | 40850 | -1301 | 22577 | AN5583 |
| 526  | CONTIG96 | 41646  | 42657  | 2.28 | 9.32E-03 | transcription_start_site | - | 40719 | 40719 | -1432 | 22578 | AN5583 |

|      |          |       |       |      |          |                          |   |       |       |       |       |        |
|------|----------|-------|-------|------|----------|--------------------------|---|-------|-------|-------|-------|--------|
| 820  | CONTIG96 | 39906 | 40325 | 1.91 | 1.06E-02 | transcription_start_site | - | 40719 | 40719 | 603   | 22578 | AN5583 |
| 820  | CONTIG96 | 39906 | 40325 | 1.91 | 1.06E-02 | transcription_start_site | - | 40850 | 40850 | 734   | 22577 | AN5583 |
| 820  | CONTIG96 | 39906 | 40325 | 1.91 | 1.06E-02 | transcription_start_site | - | 41097 | 41097 | 981   | 22576 | AN5583 |
| 820  | CONTIG96 | 39906 | 40325 | 1.91 | 1.06E-02 | transcription_start_site | - | 41205 | 41205 | 1089  | 22575 | AN5583 |
| 821  | CONTIG96 | 41101 | 41540 | 1.91 | 1.06E-02 | transcription_start_site | - | 41205 | 41205 | -115  | 22575 | AN5583 |
| 821  | CONTIG96 | 41101 | 41540 | 1.91 | 1.06E-02 | transcription_start_site | - | 41097 | 41097 | -223  | 22576 | AN5583 |
| 821  | CONTIG96 | 41101 | 41540 | 1.91 | 1.06E-02 | transcription_start_site | - | 40850 | 40850 | -470  | 22577 | AN5583 |
| 821  | CONTIG96 | 41101 | 41540 | 1.91 | 1.06E-02 | transcription_start_site | - | 40719 | 40719 | -601  | 22578 | AN5583 |
| 1553 | CONTIG96 | 47626 | 49110 | 1.23 | 4.39E-02 | transcription_start_site | - | 48356 | 48356 | -12   | 22579 | AN5584 |
| 1553 | CONTIG96 | 47626 | 49110 | 1.23 | 4.39E-02 | transcription_start_site | - | 47740 | 47740 | -628  | 22580 | AN5584 |
| 1553 | CONTIG96 | 47626 | 49110 | 1.23 | 4.39E-02 | transcription_start_site | - | 47614 | 47614 | -754  | 22581 | AN5584 |
| 1553 | CONTIG96 | 47626 | 49110 | 1.23 | 4.39E-02 | transcription_start_site | - | 47083 | 47083 | -1285 | 22582 | AN5584 |
| 2258 | CONTIG96 | 53194 | 54053 | 0.73 | 1.58E-01 | transcription_start_site | - | 48356 | 48356 | -5267 | 22579 | AN5584 |
| 1553 | CONTIG96 | 47626 | 49110 | 1.23 | 4.39E-02 | transcription_start_site | + | 49195 | 49195 | -827  | 22583 | AN5585 |
| 1553 | CONTIG96 | 47626 | 49110 | 1.23 | 4.39E-02 | transcription_start_site | + | 49355 | 49355 | -987  | 22584 | AN5585 |
| 2258 | CONTIG96 | 53194 | 54053 | 0.73 | 1.58E-01 | transcription_start_site | - | 52789 | 52789 | -834  | 22585 | AN5586 |
| 2258 | CONTIG96 | 53194 | 54053 | 0.73 | 1.58E-01 | transcription_start_site | - | 52724 | 52724 | -899  | 22586 | AN5586 |
| 2258 | CONTIG96 | 53194 | 54053 | 0.73 | 1.58E-01 | transcription_start_site | - | 52595 | 52595 | -1028 | 22587 | AN5586 |
| 2258 | CONTIG96 | 53194 | 54053 | 0.73 | 1.58E-01 | transcription_start_site | - | 52386 | 52386 | -1237 | 22588 | AN5586 |
| 2258 | CONTIG96 | 53194 | 54053 | 0.73 | 1.58E-01 | transcription_start_site | - | 51453 | 51453 | -2170 | 22589 | AN5586 |
| 567  | CONTIG96 | 59030 | 59769 | 2.23 | 1.07E-03 | transcription_start_site | - | 54698 | 54698 | -4701 | 22590 | AN5587 |
| 2258 | CONTIG96 | 53194 | 54053 | 0.73 | 1.58E-01 | transcription_start_site | - | 54698 | 54698 | 1074  | 22590 | AN5587 |
| 2258 | CONTIG96 | 53194 | 54053 | 0.73 | 1.58E-01 | transcription_start_site | + | 55416 | 55416 | -1792 | 22591 | AN5588 |
| 2258 | CONTIG96 | 53194 | 54053 | 0.73 | 1.58E-01 | transcription_start_site | + | 55505 | 55505 | -1881 | 22592 | AN5588 |
| 2258 | CONTIG96 | 53194 | 54053 | 0.73 | 1.58E-01 | transcription_start_site | + | 55706 | 55706 | -2082 | 22593 | AN5588 |
| 2258 | CONTIG96 | 53194 | 54053 | 0.73 | 1.58E-01 | transcription_start_site | + | 55851 | 55851 | -2227 | 22594 | AN5588 |
| 2258 | CONTIG96 | 53194 | 54053 | 0.73 | 1.58E-01 | transcription_start_site | + | 57608 | 57608 | -3984 | 22595 | AN5588 |
| 567  | CONTIG96 | 59030 | 59769 | 2.23 | 1.07E-03 | transcription_start_site | + | 59878 | 59878 | -478  | 22596 | AN5589 |
| 567  | CONTIG96 | 59030 | 59769 | 2.23 | 1.07E-03 | transcription_start_site | + | 60218 | 60218 | -818  | 22597 | AN5589 |
| 567  | CONTIG96 | 59030 | 59769 | 2.23 | 1.07E-03 | transcription_start_site | + | 61261 | 61261 | -1861 | 22598 | AN5589 |
| 567  | CONTIG96 | 59030 | 59769 | 2.23 | 1.07E-03 | transcription_start_site | + | 61490 | 61490 | -2090 | 22599 | AN5589 |
| 732  | CONTIG97 | 9831  | 10550 | 2.01 | 3.37E-03 | transcription_start_site | - | 6427  | 6427  | -3763 | 22639 | AN5603 |
| 732  | CONTIG97 | 9831  | 10550 | 2.01 | 3.37E-03 | transcription_start_site | - | 6334  | 6334  | -3856 | 22640 | AN5603 |
| 732  | CONTIG97 | 9831  | 10550 | 2.01 | 3.37E-03 | transcription_start_site | - | 6281  | 6281  | -3909 | 22641 | AN5603 |
| 732  | CONTIG97 | 9831  | 10550 | 2.01 | 3.37E-03 | transcription_start_site | - | 9467  | 9467  | -723  | 22642 | AN5604 |
| 732  | CONTIG97 | 9831  | 10550 | 2.01 | 3.37E-03 | transcription_start_site | - | 9282  | 9282  | -908  | 22643 | AN5604 |
| 1780 | CONTIG98 | 45901 | 46850 | 1.09 | 1.54E-01 | transcription_start_site | - | 44977 | 44977 | -1398 | 22685 | AN5621 |
| 1780 | CONTIG98 | 45901 | 46850 | 1.09 | 1.54E-01 | transcription_start_site | - | 47646 | 47646 | 1270  | 22686 | AN5622 |
| 1780 | CONTIG98 | 45901 | 46850 | 1.09 | 1.54E-01 | transcription_start_site | + | 48275 | 48275 | -1899 | 22687 | AN5623 |
| 66   | CONTIG98 | 59187 | 59606 | 3.18 | 0.00E+00 | transcription_start_site | - | 54423 | 54423 | -4973 | 22688 | AN5624 |
| 1086 | CONTIG98 | 54768 | 55117 | 1.63 | 3.34E-02 | transcription_start_site | - | 54423 | 54423 | -519  | 22688 | AN5624 |
| 1086 | CONTIG98 | 54768 | 55117 | 1.63 | 3.34E-02 | transcription_start_site | - | 54061 | 54061 | -881  | 22689 | AN5624 |
| 1086 | CONTIG98 | 54768 | 55117 | 1.63 | 3.34E-02 | transcription_start_site | - | 53971 | 53971 | -971  | 22690 | AN5624 |
| 1086 | CONTIG98 | 54768 | 55117 | 1.63 | 3.34E-02 | transcription_start_site | - | 53545 | 53545 | -1397 | 22691 | AN5624 |
| 1086 | CONTIG98 | 54768 | 55117 | 1.63 | 3.34E-02 | transcription_start_site | - | 52011 | 52011 | -2931 | 22692 | AN5624 |
| 1464 | CONTIG98 | 57452 | 57956 | 1.3  | 8.63E-02 | transcription_start_site | - | 54423 | 54423 | -3281 | 22688 | AN5624 |
| 1464 | CONTIG98 | 57452 | 57956 | 1.3  | 8.63E-02 | transcription_start_site | - | 54061 | 54061 | -3643 | 22689 | AN5624 |
| 1464 | CONTIG98 | 57452 | 57956 | 1.3  | 8.63E-02 | transcription_start_site | - | 53971 | 53971 | -3733 | 22690 | AN5624 |
| 1464 | CONTIG98 | 57452 | 57956 | 1.3  | 8.63E-02 | transcription_start_site | - | 53545 | 53545 | -4159 | 22691 | AN5624 |
| 1086 | CONTIG98 | 54768 | 55117 | 1.63 | 3.34E-02 | transcription_start_site | + | 56052 | 56052 | -1109 | 22693 | AN5625 |
| 1086 | CONTIG98 | 54768 | 55117 | 1.63 | 3.34E-02 | transcription_start_site | + | 56288 | 56288 | -1345 | 22694 | AN5625 |
| 66   | CONTIG98 | 59187 | 59606 | 3.18 | 0.00E+00 | transcription_start_site | + | 60217 | 60217 | -820  | 22695 | AN5626 |
| 66   | CONTIG98 | 59187 | 59606 | 3.18 | 0.00E+00 | transcription_start_site | + | 60320 | 60320 | -923  | 22696 | AN5626 |
| 66   | CONTIG98 | 59187 | 59606 | 3.18 | 0.00E+00 | transcription_start_site | + | 61627 | 61627 | -2230 | 22697 | AN5626 |
| 66   | CONTIG98 | 59187 | 59606 | 3.18 | 0.00E+00 | transcription_start_site | + | 61944 | 61944 | -2547 | 22698 | AN5626 |
| 66   | CONTIG98 | 59187 | 59606 | 3.18 | 0.00E+00 | transcription_start_site | + | 62123 | 62123 | -2726 | 22699 | AN5626 |
| 66   | CONTIG98 | 59187 | 59606 | 3.18 | 0.00E+00 | transcription_start_site | + | 62452 | 62452 | -3055 | 22700 | AN5626 |

|      |          |        |        |      |          |                          |   |        |        |       |       |        |
|------|----------|--------|--------|------|----------|--------------------------|---|--------|--------|-------|-------|--------|
| 575  | CONTIG98 | 62327  | 62608  | 2.22 | 6.24E-03 | transcription_start_site | + | 62452  | 62452  | 15    | 22700 | AN5626 |
| 575  | CONTIG98 | 62327  | 62608  | 2.22 | 6.24E-03 | transcription_start_site | + | 62123  | 62123  | 344   | 22699 | AN5626 |
| 575  | CONTIG98 | 62327  | 62608  | 2.22 | 6.24E-03 | transcription_start_site | + | 61944  | 61944  | 523   | 22698 | AN5626 |
| 575  | CONTIG98 | 62327  | 62608  | 2.22 | 6.24E-03 | transcription_start_site | + | 61627  | 61627  | 840   | 22697 | AN5626 |
| 1464 | CONTIG98 | 57452  | 57956  | 1.3  | 8.63E-02 | transcription_start_site | + | 60217  | 60217  | -2513 | 22695 | AN5626 |
| 1464 | CONTIG98 | 57452  | 57956  | 1.3  | 8.63E-02 | transcription_start_site | + | 60320  | 60320  | -2616 | 22696 | AN5626 |
| 1464 | CONTIG98 | 57452  | 57956  | 1.3  | 8.63E-02 | transcription_start_site | + | 61627  | 61627  | -3923 | 22697 | AN5626 |
| 1464 | CONTIG98 | 57452  | 57956  | 1.3  | 8.63E-02 | transcription_start_site | + | 61944  | 61944  | -4240 | 22698 | AN5626 |
| 1464 | CONTIG98 | 57452  | 57956  | 1.3  | 8.63E-02 | transcription_start_site | + | 62123  | 62123  | -4419 | 22699 | AN5626 |
| 1464 | CONTIG98 | 57452  | 57956  | 1.3  | 8.63E-02 | transcription_start_site | + | 62452  | 62452  | -4748 | 22700 | AN5626 |
| 66   | CONTIG98 | 59187  | 59606  | 3.18 | 0.00E+00 | transcription_start_site | + | 63735  | 63735  | -4338 | 22701 | AN5627 |
| 66   | CONTIG98 | 59187  | 59606  | 3.18 | 0.00E+00 | transcription_start_site | + | 64101  | 64101  | -4704 | 22702 | AN5627 |
| 66   | CONTIG98 | 59187  | 59606  | 3.18 | 0.00E+00 | transcription_start_site | + | 64490  | 64490  | -5093 | 22703 | AN5627 |
| 575  | CONTIG98 | 62327  | 62608  | 2.22 | 6.24E-03 | transcription_start_site | + | 63735  | 63735  | -1267 | 22701 | AN5627 |
| 575  | CONTIG98 | 62327  | 62608  | 2.22 | 6.24E-03 | transcription_start_site | + | 64101  | 64101  | -1633 | 22702 | AN5627 |
| 575  | CONTIG98 | 62327  | 62608  | 2.22 | 6.24E-03 | transcription_start_site | + | 64490  | 64490  | -2022 | 22703 | AN5627 |
| 1840 | CONTIG98 | 85967  | 86301  | 1.05 | 1.15E-01 | transcription_start_site | - | 81337  | 81337  | -4797 | 22715 | AN5631 |
| 1840 | CONTIG98 | 85967  | 86301  | 1.05 | 1.15E-01 | transcription_start_site | + | 86321  | 86321  | -187  | 22722 | AN5633 |
| 1840 | CONTIG98 | 85967  | 86301  | 1.05 | 1.15E-01 | transcription_start_site | + | 87017  | 87017  | -883  | 22723 | AN5633 |
| 1840 | CONTIG98 | 85967  | 86301  | 1.05 | 1.15E-01 | transcription_start_site | + | 87335  | 87335  | -1201 | 22724 | AN5633 |
| 174  | CONTIG98 | 90977  | 91331  | 2.89 | 2.51E-04 | transcription_start_site | - | 90541  | 90541  | -613  | 22725 | AN5634 |
| 174  | CONTIG98 | 90977  | 91331  | 2.89 | 2.51E-04 | transcription_start_site | - | 90274  | 90274  | -880  | 22726 | AN5634 |
| 174  | CONTIG98 | 90977  | 91331  | 2.89 | 2.51E-04 | transcription_start_site | - | 90056  | 90056  | -1098 | 22727 | AN5634 |
| 1465 | CONTIG98 | 104552 | 104826 | 1.3  | 8.63E-02 | transcription_start_site | - | 100700 | 100700 | -3989 | 22742 | AN5637 |
| 1465 | CONTIG98 | 104552 | 104826 | 1.3  | 8.63E-02 | transcription_start_site | - | 100595 | 100595 | -4094 | 22743 | AN5637 |
| 1465 | CONTIG98 | 104552 | 104826 | 1.3  | 8.63E-02 | transcription_start_site | - | 100311 | 100311 | -4378 | 22744 | AN5637 |
| 1465 | CONTIG98 | 104552 | 104826 | 1.3  | 8.63E-02 | transcription_start_site | - | 99941  | 99941  | -4748 | 22745 | AN5637 |
| 1465 | CONTIG98 | 104552 | 104826 | 1.3  | 8.63E-02 | transcription_start_site | - | 104279 | 104279 | -410  | 22747 | AN5639 |
| 1465 | CONTIG98 | 104552 | 104826 | 1.3  | 8.63E-02 | transcription_start_site | - | 104190 | 104190 | -499  | 22748 | AN5639 |
| 1465 | CONTIG98 | 104552 | 104826 | 1.3  | 8.63E-02 | transcription_start_site | - | 103998 | 103998 | -691  | 22749 | AN5639 |
| 1465 | CONTIG98 | 104552 | 104826 | 1.3  | 8.63E-02 | transcription_start_site | - | 103770 | 103770 | -919  | 22750 | AN5639 |
| 1465 | CONTIG98 | 104552 | 104826 | 1.3  | 8.63E-02 | transcription_start_site | - | 103686 | 103686 | -1003 | 22751 | AN5639 |
| 1465 | CONTIG98 | 104552 | 104826 | 1.3  | 8.63E-02 | transcription_start_site | - | 103566 | 103566 | -1123 | 22752 | AN5639 |
| 1465 | CONTIG98 | 104552 | 104826 | 1.3  | 8.63E-02 | transcription_start_site | - | 103127 | 103127 | -1562 | 22753 | AN5639 |
| 1465 | CONTIG98 | 104552 | 104826 | 1.3  | 8.63E-02 | transcription_start_site | - | 103003 | 103003 | -1686 | 22754 | AN5639 |
| 1181 | CONTIG98 | 168839 | 169854 | 1.55 | 4.20E-02 | transcription_start_site | - | 166525 | 166525 | -2821 | 22817 | AN5659 |
| 1181 | CONTIG98 | 168839 | 169854 | 1.55 | 4.20E-02 | transcription_start_site | - | 166323 | 166323 | -3023 | 22818 | AN5659 |
| 1181 | CONTIG98 | 168839 | 169854 | 1.55 | 4.20E-02 | transcription_start_site | - | 166166 | 166166 | -3180 | 22819 | AN5659 |
| 1181 | CONTIG98 | 168839 | 169854 | 1.55 | 4.20E-02 | transcription_start_site | - | 165567 | 165567 | -3779 | 22820 | AN5659 |
| 1524 | CONTIG98 | 167479 | 167993 | 1.26 | 9.60E-02 | transcription_start_site | - | 166525 | 166525 | -1211 | 22817 | AN5659 |
| 1524 | CONTIG98 | 167479 | 167993 | 1.26 | 9.60E-02 | transcription_start_site | - | 166323 | 166323 | -1413 | 22818 | AN5659 |
| 1524 | CONTIG98 | 167479 | 167993 | 1.26 | 9.60E-02 | transcription_start_site | - | 166166 | 166166 | -1570 | 22819 | AN5659 |
| 1524 | CONTIG98 | 167479 | 167993 | 1.26 | 9.60E-02 | transcription_start_site | - | 165567 | 165567 | -2169 | 22820 | AN5659 |
| 189  | CONTIG98 | 178811 | 179451 | 2.85 | 0.00E+00 | transcription_start_site | - | 177655 | 177655 | -1476 | 22821 | AN5660 |
| 189  | CONTIG98 | 178811 | 179451 | 2.85 | 0.00E+00 | transcription_start_site | - | 177296 | 177296 | -1835 | 22822 | AN5660 |
| 189  | CONTIG98 | 178811 | 179451 | 2.85 | 0.00E+00 | transcription_start_site | + | 182988 | 182988 | -3857 | 22823 | AN5662 |
| 189  | CONTIG98 | 178811 | 179451 | 2.85 | 0.00E+00 | transcription_start_site | + | 183112 | 183112 | -3981 | 22824 | AN5662 |
| 189  | CONTIG98 | 178811 | 179451 | 2.85 | 0.00E+00 | transcription_start_site | + | 183602 | 183602 | -4471 | 22825 | AN5662 |
| 189  | CONTIG98 | 178811 | 179451 | 2.85 | 0.00E+00 | transcription_start_site | + | 183919 | 183919 | -4788 | 22826 | AN5662 |
| 1322 | CONTIG98 | 187882 | 188316 | 1.42 | 3.02E-02 | transcription_start_site | - | 189171 | 189171 | 1072  | 22833 | AN5664 |
| 1322 | CONTIG98 | 187882 | 188316 | 1.42 | 3.02E-02 | transcription_start_site | - | 189300 | 189300 | 1201  | 22832 | AN5664 |
| 1322 | CONTIG98 | 187882 | 188316 | 1.42 | 3.02E-02 | transcription_start_site | + | 190863 | 190863 | -2764 | 22834 | AN5665 |
| 1322 | CONTIG98 | 187882 | 188316 | 1.42 | 3.02E-02 | transcription_start_site | + | 191240 | 191240 | -3141 | 22835 | AN5665 |
| 1322 | CONTIG98 | 187882 | 188316 | 1.42 | 3.02E-02 | transcription_start_site | + | 191530 | 191530 | -3431 | 22836 | AN5665 |
| 1322 | CONTIG98 | 187882 | 188316 | 1.42 | 3.02E-02 | transcription_start_site | + | 192472 | 192472 | -4373 | 22837 | AN5665 |
| 727  | CONTIG98 | 210002 | 211111 | 2.01 | 1.03E-03 | transcription_start_site | + | 211676 | 211676 | -1119 | 22853 | AN5671 |
| 727  | CONTIG98 | 210002 | 211111 | 2.01 | 1.03E-03 | transcription_start_site | + | 212260 | 212260 | -1703 | 22854 | AN5671 |

|      |          |        |        |      |          |                          |   |        |        |       |       |        |
|------|----------|--------|--------|------|----------|--------------------------|---|--------|--------|-------|-------|--------|
| 727  | CONTIG98 | 210002 | 211111 | 2.01 | 1.03E-03 | transcription_start_site | + | 212796 | 212796 | -2239 | 22855 | AN5671 |
| 727  | CONTIG98 | 210002 | 211111 | 2.01 | 1.03E-03 | transcription_start_site | + | 213183 | 213183 | -2626 | 22856 | AN5671 |
| 1525 | CONTIG98 | 248777 | 249126 | 1.26 | 9.60E-02 | transcription_start_site | - | 244900 | 244900 | -4051 | 22898 | AN5683 |
| 1525 | CONTIG98 | 248777 | 249126 | 1.26 | 9.60E-02 | transcription_start_site | - | 243818 | 243818 | -5133 | 22899 | AN5683 |
| 1525 | CONTIG98 | 248777 | 249126 | 1.26 | 9.60E-02 | transcription_start_site | - | 246692 | 246692 | -2259 | 22900 | AN5684 |
| 1525 | CONTIG98 | 248777 | 249126 | 1.26 | 9.60E-02 | transcription_start_site | - | 246546 | 246546 | -2405 | 22901 | AN5684 |
| 1525 | CONTIG98 | 248777 | 249126 | 1.26 | 9.60E-02 | transcription_start_site | - | 246197 | 246197 | -2754 | 22902 | AN5684 |
| 1525 | CONTIG98 | 248777 | 249126 | 1.26 | 9.60E-02 | transcription_start_site | - | 246038 | 246038 | -2913 | 22903 | AN5684 |
| 1525 | CONTIG98 | 248777 | 249126 | 1.26 | 9.60E-02 | transcription_start_site | - | 245743 | 245743 | -3208 | 22904 | AN5684 |
| 1525 | CONTIG98 | 248777 | 249126 | 1.26 | 9.60E-02 | transcription_start_site | - | 248704 | 248704 | -247  | 22907 | AN5686 |
| 1525 | CONTIG98 | 248777 | 249126 | 1.26 | 9.60E-02 | transcription_start_site | - | 248504 | 248504 | -447  | 22908 | AN5686 |
| 1525 | CONTIG98 | 248777 | 249126 | 1.26 | 9.60E-02 | transcription_start_site | - | 248139 | 248139 | -812  | 22909 | AN5686 |
| 1525 | CONTIG98 | 248777 | 249126 | 1.26 | 9.60E-02 | transcription_start_site | + | 249101 | 249101 | -149  | 22910 | AN5687 |
| 1525 | CONTIG98 | 248777 | 249126 | 1.26 | 9.60E-02 | transcription_start_site | + | 249424 | 249424 | -472  | 22911 | AN5687 |
| 1525 | CONTIG98 | 248777 | 249126 | 1.26 | 9.60E-02 | transcription_start_site | + | 249714 | 249714 | -762  | 22912 | AN5687 |
| 1525 | CONTIG98 | 248777 | 249126 | 1.26 | 9.60E-02 | transcription_start_site | + | 251102 | 251102 | -2150 | 22913 | AN5688 |
| 1525 | CONTIG98 | 248777 | 249126 | 1.26 | 9.60E-02 | transcription_start_site | + | 251308 | 251308 | -2356 | 22914 | AN5688 |
| 1525 | CONTIG98 | 248777 | 249126 | 1.26 | 9.60E-02 | transcription_start_site | + | 251848 | 251848 | -2896 | 22915 | AN5688 |
| 1525 | CONTIG98 | 248777 | 249126 | 1.26 | 9.60E-02 | transcription_start_site | + | 252651 | 252651 | -3699 | 22916 | AN5688 |
| 1126 | CONTIG98 | 258237 | 258516 | 1.59 | 3.70E-02 | transcription_start_site | - | 256697 | 256697 | -1679 | 22917 | AN5689 |
| 1126 | CONTIG98 | 258237 | 258516 | 1.59 | 3.70E-02 | transcription_start_site | - | 255925 | 255925 | -2451 | 22918 | AN5689 |
| 1126 | CONTIG98 | 258237 | 258516 | 1.59 | 3.70E-02 | transcription_start_site | - | 259101 | 259101 | 724   | 22922 | AN5690 |
| 1126 | CONTIG98 | 258237 | 258516 | 1.59 | 3.70E-02 | transcription_start_site | + | 262015 | 262015 | -3638 | 22923 | AN5691 |
| 1126 | CONTIG98 | 258237 | 258516 | 1.59 | 3.70E-02 | transcription_start_site | + | 262218 | 262218 | -3841 | 22924 | AN5691 |
| 1126 | CONTIG98 | 258237 | 258516 | 1.59 | 3.70E-02 | transcription_start_site | + | 263062 | 263062 | -4685 | 22925 | AN5691 |
| 1126 | CONTIG98 | 258237 | 258516 | 1.59 | 3.70E-02 | transcription_start_site | + | 263344 | 263344 | -4967 | 22926 | AN5691 |
| 1975 | CONTIG98 | 282830 | 283419 | 0.96 | 1.57E-01 | transcription_start_site | - | 281317 | 281317 | -1807 | 22939 | AN5698 |
| 1975 | CONTIG98 | 282830 | 283419 | 0.96 | 1.57E-01 | transcription_start_site | - | 282978 | 282978 | -146  | 22940 | AN5699 |
| 1975 | CONTIG98 | 282830 | 283419 | 0.96 | 1.57E-01 | transcription_start_site | - | 282841 | 282841 | -283  | 22941 | AN5699 |
| 1975 | CONTIG98 | 282830 | 283419 | 0.96 | 1.57E-01 | transcription_start_site | + | 283605 | 283605 | -480  | 22942 | AN5700 |
| 1975 | CONTIG98 | 282830 | 283419 | 0.96 | 1.57E-01 | transcription_start_site | + | 287571 | 287571 | -4446 | 22943 | AN5701 |
| 1975 | CONTIG98 | 282830 | 283419 | 0.96 | 1.57E-01 | transcription_start_site | + | 287649 | 287649 | -4524 | 22944 | AN5701 |
| 1975 | CONTIG98 | 282830 | 283419 | 0.96 | 1.57E-01 | transcription_start_site | + | 287787 | 287787 | -4662 | 22945 | AN5701 |
| 1914 | CONTIG98 | 297992 | 298326 | 1    | 1.97E-01 | transcription_start_site | + | 300815 | 300815 | -2656 | 22962 | AN5707 |
| 1914 | CONTIG98 | 297992 | 298326 | 1    | 1.97E-01 | transcription_start_site | + | 300885 | 300885 | -2726 | 22963 | AN5707 |
| 1914 | CONTIG98 | 297992 | 298326 | 1    | 1.97E-01 | transcription_start_site | + | 302197 | 302197 | -4038 | 22964 | AN5708 |
| 1914 | CONTIG98 | 297992 | 298326 | 1    | 1.97E-01 | transcription_start_site | + | 302623 | 302623 | -4464 | 22965 | AN5708 |
| 1914 | CONTIG98 | 297992 | 298326 | 1    | 1.97E-01 | transcription_start_site | + | 303137 | 303137 | -4978 | 22966 | AN5708 |
| 22   | CONTIG98 | 308553 | 309062 | 3.43 | 0.00E+00 | transcription_start_site | - | 308403 | 308403 | -404  | 22968 | AN5709 |
| 22   | CONTIG98 | 308553 | 309062 | 3.43 | 0.00E+00 | transcription_start_site | - | 308254 | 308254 | -553  | 22969 | AN5709 |
| 22   | CONTIG98 | 308553 | 309062 | 3.43 | 0.00E+00 | transcription_start_site | - | 306578 | 306578 | -2229 | 22970 | AN5709 |
| 36   | CONTIG98 | 305938 | 306352 | 3.31 | 0.00E+00 | transcription_start_site | - | 306578 | 306578 | 433   | 22970 | AN5709 |
| 56   | CONTIG98 | 309458 | 309727 | 3.22 | 0.00E+00 | transcription_start_site | - | 308403 | 308403 | -1189 | 22968 | AN5709 |
| 56   | CONTIG98 | 309458 | 309727 | 3.22 | 0.00E+00 | transcription_start_site | - | 308254 | 308254 | -1338 | 22969 | AN5709 |
| 56   | CONTIG98 | 309458 | 309727 | 3.22 | 0.00E+00 | transcription_start_site | - | 306578 | 306578 | -3014 | 22970 | AN5709 |
| 1526 | CONTIG98 | 307358 | 307927 | 1.26 | 9.60E-02 | transcription_start_site | - | 308254 | 308254 | 611   | 22969 | AN5709 |
| 1526 | CONTIG98 | 307358 | 307927 | 1.26 | 9.60E-02 | transcription_start_site | - | 308403 | 308403 | 760   | 22968 | AN5709 |
| 1526 | CONTIG98 | 307358 | 307927 | 1.26 | 9.60E-02 | transcription_start_site | - | 306578 | 306578 | -1064 | 22970 | AN5709 |
| 1087 | CONTIG98 | 316511 | 316870 | 1.63 | 3.34E-02 | transcription_start_site | - | 312966 | 312966 | -3724 | 22971 | AN5710 |
| 1087 | CONTIG98 | 316511 | 316870 | 1.63 | 3.34E-02 | transcription_start_site | - | 312834 | 312834 | -3856 | 22972 | AN5710 |
| 1087 | CONTIG98 | 316511 | 316870 | 1.63 | 3.34E-02 | transcription_start_site | - | 312660 | 312660 | -4030 | 22973 | AN5710 |
| 1087 | CONTIG98 | 316511 | 316870 | 1.63 | 3.34E-02 | transcription_start_site | - | 312522 | 312522 | -4168 | 22974 | AN5710 |
| 1087 | CONTIG98 | 316511 | 316870 | 1.63 | 3.34E-02 | transcription_start_site | - | 312178 | 312178 | -4512 | 22975 | AN5710 |
| 1087 | CONTIG98 | 316511 | 316870 | 1.63 | 3.34E-02 | transcription_start_site | - | 311855 | 311855 | -4835 | 22976 | AN5710 |
| 22   | CONTIG98 | 308553 | 309062 | 3.43 | 0.00E+00 | transcription_start_site | + | 313279 | 313279 | -4471 | 22979 | AN5711 |
| 22   | CONTIG98 | 308553 | 309062 | 3.43 | 0.00E+00 | transcription_start_site | + | 313569 | 313569 | -4761 | 22980 | AN5711 |
| 22   | CONTIG98 | 308553 | 309062 | 3.43 | 0.00E+00 | transcription_start_site | + | 313761 | 313761 | -4953 | 22981 | AN5711 |



|      |          |        |        |      |          |                          |   |        |        |       |       |        |
|------|----------|--------|--------|------|----------|--------------------------|---|--------|--------|-------|-------|--------|
| 56   | CONTIG98 | 309458 | 309727 | 3.22 | 0.00E+00 | transcription_start_site | + | 313279 | 313279 | -3686 | 22979 | AN5711 |
| 56   | CONTIG98 | 309458 | 309727 | 3.22 | 0.00E+00 | transcription_start_site | + | 313569 | 313569 | -3976 | 22980 | AN5711 |
| 56   | CONTIG98 | 309458 | 309727 | 3.22 | 0.00E+00 | transcription_start_site | + | 313761 | 313761 | -4168 | 22981 | AN5711 |
| 1087 | CONTIG98 | 316511 | 316870 | 1.63 | 3.34E-02 | transcription_start_site | - | 316393 | 316393 | -297  | 22982 | AN5712 |
| 1087 | CONTIG98 | 316511 | 316870 | 1.63 | 3.34E-02 | transcription_start_site | - | 316147 | 316147 | -543  | 22983 | AN5712 |
| 1087 | CONTIG98 | 316511 | 316870 | 1.63 | 3.34E-02 | transcription_start_site | - | 315952 | 315952 | -738  | 22984 | AN5712 |
| 1087 | CONTIG98 | 316511 | 316870 | 1.63 | 3.34E-02 | transcription_start_site | - | 315832 | 315832 | -858  | 22985 | AN5712 |
| 1087 | CONTIG98 | 316511 | 316870 | 1.63 | 3.34E-02 | transcription_start_site | - | 314779 | 314779 | -1911 | 22986 | AN5712 |
| 1087 | CONTIG98 | 316511 | 316870 | 1.63 | 3.34E-02 | transcription_start_site | - | 317524 | 317524 | 833   | 22992 | AN5713 |
| 1087 | CONTIG98 | 316511 | 316870 | 1.63 | 3.34E-02 | transcription_start_site | + | 321504 | 321504 | -4813 | 22993 | AN5714 |
| 1087 | CONTIG98 | 316511 | 316870 | 1.63 | 3.34E-02 | transcription_start_site | + | 321748 | 321748 | -5057 | 22994 | AN5714 |
| 999  | CONTIG98 | 325295 | 325569 | 1.72 | 2.63E-02 | transcription_start_site | - | 325172 | 325172 | -260  | 22995 | AN5715 |
| 999  | CONTIG98 | 325295 | 325569 | 1.72 | 2.63E-02 | transcription_start_site | - | 324940 | 324940 | -492  | 22996 | AN5715 |
| 999  | CONTIG98 | 325295 | 325569 | 1.72 | 2.63E-02 | transcription_start_site | - | 324630 | 324630 | -802  | 22997 | AN5715 |
| 999  | CONTIG98 | 325295 | 325569 | 1.72 | 2.63E-02 | transcription_start_site | - | 324459 | 324459 | -973  | 22998 | AN5715 |
| 999  | CONTIG98 | 325295 | 325569 | 1.72 | 2.63E-02 | transcription_start_site | + | 325945 | 325945 | -513  | 22999 | AN5716 |
| 999  | CONTIG98 | 325295 | 325569 | 1.72 | 2.63E-02 | transcription_start_site | + | 326257 | 326257 | -825  | 23000 | AN5716 |
| 999  | CONTIG98 | 325295 | 325569 | 1.72 | 2.63E-02 | transcription_start_site | + | 327181 | 327181 | -1749 | 23001 | AN5716 |
| 999  | CONTIG98 | 325295 | 325569 | 1.72 | 2.63E-02 | transcription_start_site | + | 327332 | 327332 | -1900 | 23002 | AN5716 |
| 999  | CONTIG98 | 325295 | 325569 | 1.72 | 2.63E-02 | transcription_start_site | + | 328877 | 328877 | -3445 | 23003 | AN5717 |
| 999  | CONTIG98 | 325295 | 325569 | 1.72 | 2.63E-02 | transcription_start_site | + | 329165 | 329165 | -3733 | 23004 | AN5717 |
| 999  | CONTIG98 | 325295 | 325569 | 1.72 | 2.63E-02 | transcription_start_site | + | 329464 | 329464 | -4032 | 23005 | AN5717 |
| 999  | CONTIG98 | 325295 | 325569 | 1.72 | 2.63E-02 | transcription_start_site | + | 329708 | 329708 | -4276 | 23006 | AN5717 |
| 999  | CONTIG98 | 325295 | 325569 | 1.72 | 2.63E-02 | transcription_start_site | + | 330191 | 330191 | -4759 | 23007 | AN5717 |
| 1176 | CONTIG98 | 340204 | 340718 | 1.55 | 9.64E-03 | transcription_start_site | - | 337630 | 337630 | -2831 | 23020 | AN5720 |
| 1176 | CONTIG98 | 340204 | 340718 | 1.55 | 9.64E-03 | transcription_start_site | - | 337453 | 337453 | -3008 | 23021 | AN5720 |
| 1176 | CONTIG98 | 340204 | 340718 | 1.55 | 9.64E-03 | transcription_start_site | - | 336770 | 336770 | -3691 | 23022 | AN5720 |
| 1176 | CONTIG98 | 340204 | 340718 | 1.55 | 9.64E-03 | transcription_start_site | - | 336669 | 336669 | -3792 | 23023 | AN5720 |
| 1176 | CONTIG98 | 340204 | 340718 | 1.55 | 9.64E-03 | transcription_start_site | - | 336558 | 336558 | -3903 | 23024 | AN5720 |
| 1176 | CONTIG98 | 340204 | 340718 | 1.55 | 9.64E-03 | transcription_start_site | - | 340314 | 340314 | -147  | 23025 | AN5721 |
| 1176 | CONTIG98 | 340204 | 340718 | 1.55 | 9.64E-03 | transcription_start_site | + | 340709 | 340709 | -248  | 23026 | AN5722 |
| 1176 | CONTIG98 | 340204 | 340718 | 1.55 | 9.64E-03 | transcription_start_site | + | 341424 | 341424 | -963  | 23027 | AN5722 |
| 1176 | CONTIG98 | 340204 | 340718 | 1.55 | 9.64E-03 | transcription_start_site | + | 342504 | 342504 | -2043 | 23028 | AN5722 |
| 1176 | CONTIG98 | 340204 | 340718 | 1.55 | 9.64E-03 | transcription_start_site | + | 343263 | 343263 | -2802 | 23029 | AN5723 |
| 1176 | CONTIG98 | 340204 | 340718 | 1.55 | 9.64E-03 | transcription_start_site | + | 343457 | 343457 | -2996 | 23030 | AN5723 |
| 1176 | CONTIG98 | 340204 | 340718 | 1.55 | 9.64E-03 | transcription_start_site | + | 343550 | 343550 | -3089 | 23031 | AN5723 |
| 1052 | CONTIG98 | 351694 | 352103 | 1.67 | 3.01E-02 | transcription_start_site | - | 350632 | 350632 | -1266 | 23036 | AN5726 |
| 1052 | CONTIG98 | 351694 | 352103 | 1.67 | 3.01E-02 | transcription_start_site | - | 349408 | 349408 | -2490 | 23037 | AN5726 |
| 1052 | CONTIG98 | 351694 | 352103 | 1.67 | 3.01E-02 | transcription_start_site | - | 352315 | 352315 | 416   | 23040 | AN5727 |
| 1052 | CONTIG98 | 351694 | 352103 | 1.67 | 3.01E-02 | transcription_start_site | - | 353089 | 353089 | 1190  | 23039 | AN5727 |
| 13   | CONTIG98 | 359104 | 360370 | 3.52 | 0.00E+00 | transcription_start_site | - | 357976 | 357976 | -1761 | 23041 | AN5728 |
| 13   | CONTIG98 | 359104 | 360370 | 3.52 | 0.00E+00 | transcription_start_site | - | 357204 | 357204 | -2533 | 23042 | AN5728 |
| 1712 | CONTIG98 | 394662 | 395172 | 1.13 | 6.93E-02 | transcription_start_site | - | 390802 | 390802 | -4115 | 23080 | AN5738 |
| 1712 | CONTIG98 | 394662 | 395172 | 1.13 | 6.93E-02 | transcription_start_site | - | 390483 | 390483 | -4434 | 23081 | AN5738 |
| 1712 | CONTIG98 | 394662 | 395172 | 1.13 | 6.93E-02 | transcription_start_site | - | 390358 | 390358 | -4559 | 23082 | AN5738 |
| 1712 | CONTIG98 | 394662 | 395172 | 1.13 | 6.93E-02 | transcription_start_site | - | 390170 | 390170 | -4747 | 23083 | AN5738 |
| 1712 | CONTIG98 | 394662 | 395172 | 1.13 | 6.93E-02 | transcription_start_site | + | 393857 | 393857 | 1060  | 23090 | AN5739 |
| 1712 | CONTIG98 | 394662 | 395172 | 1.13 | 6.93E-02 | transcription_start_site | + | 393780 | 393780 | 1137  | 23089 | AN5739 |
| 1712 | CONTIG98 | 394662 | 395172 | 1.13 | 6.93E-02 | transcription_start_site | + | 395872 | 395872 | -955  | 23091 | AN5740 |
| 1712 | CONTIG98 | 394662 | 395172 | 1.13 | 6.93E-02 | transcription_start_site | + | 396010 | 396010 | -1093 | 23092 | AN5740 |
| 1712 | CONTIG98 | 394662 | 395172 | 1.13 | 6.93E-02 | transcription_start_site | + | 396135 | 396135 | -1218 | 23093 | AN5740 |
| 1712 | CONTIG98 | 394662 | 395172 | 1.13 | 6.93E-02 | transcription_start_site | + | 396397 | 396397 | -1480 | 23094 | AN5740 |
| 1712 | CONTIG98 | 394662 | 395172 | 1.13 | 6.93E-02 | transcription_start_site | + | 396587 | 396587 | -1670 | 23095 | AN5740 |
| 1712 | CONTIG98 | 394662 | 395172 | 1.13 | 6.93E-02 | transcription_start_site | + | 397623 | 397623 | -2706 | 23096 | AN5741 |
| 1712 | CONTIG98 | 394662 | 395172 | 1.13 | 6.93E-02 | transcription_start_site | + | 398116 | 398116 | -3199 | 23097 | AN5741 |
| 1657 | CONTIG98 | 405394 | 405887 | 1.17 | 7.38E-02 | transcription_start_site | - | 400809 | 400809 | -4831 | 23098 | AN5742 |
| 1657 | CONTIG98 | 405394 | 405887 | 1.17 | 7.38E-02 | transcription_start_site | - | 400562 | 400562 | -5078 | 23099 | AN5742 |

|               |        |        |      |          |                          |   |        |        |       |       |        |
|---------------|--------|--------|------|----------|--------------------------|---|--------|--------|-------|-------|--------|
| 1657 CONTIG98 | 405394 | 405887 | 1.17 | 7.38E-02 | transcription_start_site | - | 400444 | 400444 | -5196 | 23100 | AN5742 |
| 1657 CONTIG98 | 405394 | 405887 | 1.17 | 7.38E-02 | transcription_start_site | - | 405148 | 405148 | -492  | 23103 | AN5743 |
| 1657 CONTIG98 | 405394 | 405887 | 1.17 | 7.38E-02 | transcription_start_site | - | 404959 | 404959 | -681  | 23104 | AN5743 |
| 1657 CONTIG98 | 405394 | 405887 | 1.17 | 7.38E-02 | transcription_start_site | - | 404734 | 404734 | -906  | 23105 | AN5743 |
| 1657 CONTIG98 | 405394 | 405887 | 1.17 | 7.38E-02 | transcription_start_site | - | 402367 | 402367 | -3273 | 23106 | AN5743 |
| 1657 CONTIG98 | 405394 | 405887 | 1.17 | 7.38E-02 | transcription_start_site | - | 401989 | 401989 | -3651 | 23107 | AN5743 |
| 1657 CONTIG98 | 405394 | 405887 | 1.17 | 7.38E-02 | transcription_start_site | + | 406597 | 406597 | -956  | 23108 | AN5744 |
| 1657 CONTIG98 | 405394 | 405887 | 1.17 | 7.38E-02 | transcription_start_site | + | 406778 | 406778 | -1137 | 23109 | AN5744 |
| 1657 CONTIG98 | 405394 | 405887 | 1.17 | 7.38E-02 | transcription_start_site | + | 406849 | 406849 | -1208 | 23110 | AN5744 |
| 1657 CONTIG98 | 405394 | 405887 | 1.17 | 7.38E-02 | transcription_start_site | + | 406968 | 406968 | -1327 | 23111 | AN5744 |
| 1657 CONTIG98 | 405394 | 405887 | 1.17 | 7.38E-02 | transcription_start_site | + | 407052 | 407052 | -1411 | 23112 | AN5744 |
| 1657 CONTIG98 | 405394 | 405887 | 1.17 | 7.38E-02 | transcription_start_site | + | 407147 | 407147 | -1506 | 23113 | AN5744 |
| 1657 CONTIG98 | 405394 | 405887 | 1.17 | 7.38E-02 | transcription_start_site | + | 407474 | 407474 | -1833 | 23114 | AN5744 |
| 1657 CONTIG98 | 405394 | 405887 | 1.17 | 7.38E-02 | transcription_start_site | + | 407622 | 407622 | -1981 | 23115 | AN5744 |
| 1053 CONTIG98 | 412353 | 412706 | 1.67 | 3.01E-02 | transcription_start_site | - | 409790 | 409790 | -2739 | 23116 | AN5745 |
| 1053 CONTIG98 | 412353 | 412706 | 1.67 | 3.01E-02 | transcription_start_site | - | 409717 | 409717 | -2812 | 23117 | AN5745 |
| 1053 CONTIG98 | 412353 | 412706 | 1.67 | 3.01E-02 | transcription_start_site | - | 409582 | 409582 | -2947 | 23118 | AN5745 |
| 1053 CONTIG98 | 412353 | 412706 | 1.67 | 3.01E-02 | transcription_start_site | - | 411863 | 411863 | -666  | 23119 | AN5746 |
| 1053 CONTIG98 | 412353 | 412706 | 1.67 | 3.01E-02 | transcription_start_site | - | 411676 | 411676 | -853  | 23120 | AN5746 |
| 1053 CONTIG98 | 412353 | 412706 | 1.67 | 3.01E-02 | transcription_start_site | - | 411552 | 411552 | -977  | 23121 | AN5746 |
| 1053 CONTIG98 | 412353 | 412706 | 1.67 | 3.01E-02 | transcription_start_site | - | 411158 | 411158 | -1371 | 23122 | AN5746 |
| 1053 CONTIG98 | 412353 | 412706 | 1.67 | 3.01E-02 | transcription_start_site | - | 410666 | 410666 | -1863 | 23123 | AN5746 |
| 1053 CONTIG98 | 412353 | 412706 | 1.67 | 3.01E-02 | transcription_start_site | + | 413073 | 413073 | -543  | 23124 | AN5747 |
| 1053 CONTIG98 | 412353 | 412706 | 1.67 | 3.01E-02 | transcription_start_site | + | 413356 | 413356 | -826  | 23125 | AN5747 |
| 1053 CONTIG98 | 412353 | 412706 | 1.67 | 3.01E-02 | transcription_start_site | + | 413792 | 413792 | -1262 | 23126 | AN5747 |
| 1053 CONTIG98 | 412353 | 412706 | 1.67 | 3.01E-02 | transcription_start_site | + | 414298 | 414298 | -1768 | 23127 | AN5747 |
| 1053 CONTIG98 | 412353 | 412706 | 1.67 | 3.01E-02 | transcription_start_site | + | 415019 | 415019 | -2489 | 23128 | AN5748 |
| 1053 CONTIG98 | 412353 | 412706 | 1.67 | 3.01E-02 | transcription_start_site | + | 415576 | 415576 | -3046 | 23129 | AN5748 |
| 1053 CONTIG98 | 412353 | 412706 | 1.67 | 3.01E-02 | transcription_start_site | + | 416269 | 416269 | -3739 | 23130 | AN5748 |
| 143 CONTIG98  | 419714 | 420278 | 2.97 | 0.00E+00 | transcription_start_site | - | 418762 | 418762 | -1234 | 23131 | AN5749 |
| 1127 CONTIG98 | 418509 | 419089 | 1.59 | 3.70E-02 | transcription_start_site | - | 418762 | 418762 | -37   | 23131 | AN5749 |
| 143 CONTIG98  | 419714 | 420278 | 2.97 | 0.00E+00 | transcription_start_site | + | 421082 | 421082 | -1086 | 23132 | AN5750 |
| 143 CONTIG98  | 419714 | 420278 | 2.97 | 0.00E+00 | transcription_start_site | + | 421488 | 421488 | -1492 | 23133 | AN5750 |
| 1127 CONTIG98 | 418509 | 419089 | 1.59 | 3.70E-02 | transcription_start_site | + | 421082 | 421082 | -2283 | 23132 | AN5750 |
| 1127 CONTIG98 | 418509 | 419089 | 1.59 | 3.70E-02 | transcription_start_site | + | 421488 | 421488 | -2689 | 23133 | AN5750 |
| 511 CONTIG98  | 427813 | 428302 | 2.3  | 4.57E-03 | transcription_start_site | - | 426324 | 426324 | -1733 | 23134 | AN5751 |
| 511 CONTIG98  | 427813 | 428302 | 2.3  | 4.57E-03 | transcription_start_site | - | 426181 | 426181 | -1876 | 23135 | AN5751 |
| 511 CONTIG98  | 427813 | 428302 | 2.3  | 4.57E-03 | transcription_start_site | - | 425955 | 425955 | -2102 | 23136 | AN5751 |
| 511 CONTIG98  | 427813 | 428302 | 2.3  | 4.57E-03 | transcription_start_site | - | 425794 | 425794 | -2263 | 23137 | AN5751 |
| 511 CONTIG98  | 427813 | 428302 | 2.3  | 4.57E-03 | transcription_start_site | - | 425440 | 425440 | -2617 | 23138 | AN5751 |
| 511 CONTIG98  | 427813 | 428302 | 2.3  | 4.57E-03 | transcription_start_site | - | 425252 | 425252 | -2805 | 23139 | AN5751 |
| 511 CONTIG98  | 427813 | 428302 | 2.3  | 4.57E-03 | transcription_start_site | - | 425061 | 425061 | -2996 | 23140 | AN5751 |
| 511 CONTIG98  | 427813 | 428302 | 2.3  | 4.57E-03 | transcription_start_site | - | 424728 | 424728 | -3329 | 23141 | AN5751 |
| 511 CONTIG98  | 427813 | 428302 | 2.3  | 4.57E-03 | transcription_start_site | - | 424349 | 424349 | -3708 | 23142 | AN5751 |
| 511 CONTIG98  | 427813 | 428302 | 2.3  | 4.57E-03 | transcription_start_site | - | 423761 | 423761 | -4296 | 23143 | AN5751 |
| 511 CONTIG98  | 427813 | 428302 | 2.3  | 4.57E-03 | transcription_start_site | - | 423656 | 423656 | -4401 | 23144 | AN5751 |
| 511 CONTIG98  | 427813 | 428302 | 2.3  | 4.57E-03 | transcription_start_site | - | 423306 | 423306 | -4751 | 23145 | AN5751 |
| 511 CONTIG98  | 427813 | 428302 | 2.3  | 4.57E-03 | transcription_start_site | - | 427671 | 427671 | -386  | 23146 | AN5752 |
| 511 CONTIG98  | 427813 | 428302 | 2.3  | 4.57E-03 | transcription_start_site | - | 427127 | 427127 | -930  | 23147 | AN5752 |
| 511 CONTIG98  | 427813 | 428302 | 2.3  | 4.57E-03 | transcription_start_site | + | 428704 | 428704 | -646  | 23148 | AN5753 |
| 511 CONTIG98  | 427813 | 428302 | 2.3  | 4.57E-03 | transcription_start_site | + | 428833 | 428833 | -775  | 23149 | AN5753 |
| 511 CONTIG98  | 427813 | 428302 | 2.3  | 4.57E-03 | transcription_start_site | + | 429806 | 429806 | -1748 | 23150 | AN5754 |
| 511 CONTIG98  | 427813 | 428302 | 2.3  | 4.57E-03 | transcription_start_site | + | 430015 | 430015 | -1957 | 23151 | AN5754 |
| 511 CONTIG98  | 427813 | 428302 | 2.3  | 4.57E-03 | transcription_start_site | + | 430175 | 430175 | -2117 | 23152 | AN5754 |
| 511 CONTIG98  | 427813 | 428302 | 2.3  | 4.57E-03 | transcription_start_site | + | 430235 | 430235 | -2177 | 23153 | AN5754 |
| 511 CONTIG98  | 427813 | 428302 | 2.3  | 4.57E-03 | transcription_start_site | + | 430370 | 430370 | -2312 | 23154 | AN5754 |
| 511 CONTIG98  | 427813 | 428302 | 2.3  | 4.57E-03 | transcription_start_site | + | 430802 | 430802 | -2744 | 23155 | AN5754 |

|      |           |        |        |      |          |                          |   |        |        |       |       |        |
|------|-----------|--------|--------|------|----------|--------------------------|---|--------|--------|-------|-------|--------|
| 32   | CONTIG98  | 436355 | 436939 | 3.35 | 0.00E+00 | transcription_start_site | - | 433532 | 433532 | -3115 | 23156 | AN5755 |
| 576  | CONTIG98  | 435003 | 435442 | 2.22 | 6.24E-03 | transcription_start_site | - | 433532 | 433532 | -1690 | 23156 | AN5755 |
| 734  | CONTIG98  | 433953 | 434392 | 2.01 | 4.22E-03 | transcription_start_site | - | 433532 | 433532 | -640  | 23156 | AN5755 |
| 32   | CONTIG98  | 436355 | 436939 | 3.35 | 0.00E+00 | transcription_start_site | + | 436227 | 436227 | 420   | 23158 | AN5756 |
| 32   | CONTIG98  | 436355 | 436939 | 3.35 | 0.00E+00 | transcription_start_site | + | 436065 | 436065 | 582   | 23157 | AN5756 |
| 576  | CONTIG98  | 435003 | 435442 | 2.22 | 6.24E-03 | transcription_start_site | + | 436065 | 436065 | -842  | 23157 | AN5756 |
| 576  | CONTIG98  | 435003 | 435442 | 2.22 | 6.24E-03 | transcription_start_site | + | 436227 | 436227 | -1004 | 23158 | AN5756 |
| 734  | CONTIG98  | 433953 | 434392 | 2.01 | 4.22E-03 | transcription_start_site | + | 436065 | 436065 | -1892 | 23157 | AN5756 |
| 734  | CONTIG98  | 433953 | 434392 | 2.01 | 4.22E-03 | transcription_start_site | + | 436227 | 436227 | -2054 | 23158 | AN5756 |
| 1178 | CONTIG98  | 443855 | 444585 | 1.55 | 2.07E-02 | transcription_start_site | - | 443055 | 443055 | -1165 | 23159 | AN5757 |
| 1178 | CONTIG98  | 443855 | 444585 | 1.55 | 2.07E-02 | transcription_start_site | - | 442873 | 442873 | -1347 | 23160 | AN5757 |
| 1178 | CONTIG98  | 443855 | 444585 | 1.55 | 2.07E-02 | transcription_start_site | - | 442757 | 442757 | -1463 | 23161 | AN5757 |
| 1178 | CONTIG98  | 443855 | 444585 | 1.55 | 2.07E-02 | transcription_start_site | - | 442554 | 442554 | -1666 | 23162 | AN5757 |
| 1178 | CONTIG98  | 443855 | 444585 | 1.55 | 2.07E-02 | transcription_start_site | - | 442102 | 442102 | -2118 | 23163 | AN5757 |
| 1178 | CONTIG98  | 443855 | 444585 | 1.55 | 2.07E-02 | transcription_start_site | - | 441471 | 441471 | -2749 | 23164 | AN5757 |
| 158  | CONTIG98  | 459308 | 459802 | 2.93 | 2.69E-04 | transcription_start_site | - | 455565 | 455565 | -3990 | 23181 | AN5762 |
| 158  | CONTIG98  | 459308 | 459802 | 2.93 | 2.69E-04 | transcription_start_site | - | 455399 | 455399 | -4156 | 23182 | AN5762 |
| 158  | CONTIG98  | 459308 | 459802 | 2.93 | 2.69E-04 | transcription_start_site | - | 455184 | 455184 | -4371 | 23183 | AN5762 |
| 158  | CONTIG98  | 459308 | 459802 | 2.93 | 2.69E-04 | transcription_start_site | + | 459095 | 459095 | 460   | 23190 | AN5763 |
| 158  | CONTIG98  | 459308 | 459802 | 2.93 | 2.69E-04 | transcription_start_site | + | 458879 | 458879 | 676   | 23189 | AN5763 |
| 158  | CONTIG98  | 459308 | 459802 | 2.93 | 2.69E-04 | transcription_start_site | + | 458423 | 458423 | 1132  | 23188 | AN5763 |
| 158  | CONTIG98  | 459308 | 459802 | 2.93 | 2.69E-04 | transcription_start_site | + | 459902 | 459902 | -347  | 23191 | AN5764 |
| 158  | CONTIG98  | 459308 | 459802 | 2.93 | 2.69E-04 | transcription_start_site | + | 460036 | 460036 | -481  | 23192 | AN5764 |
| 158  | CONTIG98  | 459308 | 459802 | 2.93 | 2.69E-04 | transcription_start_site | + | 460179 | 460179 | -624  | 23193 | AN5764 |
| 158  | CONTIG98  | 459308 | 459802 | 2.93 | 2.69E-04 | transcription_start_site | + | 461496 | 461496 | -1941 | 23194 | AN5764 |
| 158  | CONTIG98  | 459308 | 459802 | 2.93 | 2.69E-04 | transcription_start_site | + | 463086 | 463086 | -3531 | 23195 | AN5765 |
| 158  | CONTIG98  | 459308 | 459802 | 2.93 | 2.69E-04 | transcription_start_site | + | 463274 | 463274 | -3719 | 23196 | AN5765 |
| 158  | CONTIG98  | 459308 | 459802 | 2.93 | 2.69E-04 | transcription_start_site | + | 463495 | 463495 | -3940 | 23197 | AN5765 |
| 269  | CONTIG98  | 470562 | 471051 | 2.68 | 8.43E-04 | transcription_start_site | - | 470596 | 470596 | -210  | 23200 | AN5768 |
| 269  | CONTIG98  | 470562 | 471051 | 2.68 | 8.43E-04 | transcription_start_site | - | 470486 | 470486 | -320  | 23201 | AN5768 |
| 269  | CONTIG98  | 470562 | 471051 | 2.68 | 8.43E-04 | transcription_start_site | - | 470351 | 470351 | -455  | 23202 | AN5768 |
| 269  | CONTIG98  | 470562 | 471051 | 2.68 | 8.43E-04 | transcription_start_site | - | 470012 | 470012 | -794  | 23203 | AN5768 |
| 269  | CONTIG98  | 470562 | 471051 | 2.68 | 8.43E-04 | transcription_start_site | - | 469754 | 469754 | -1052 | 23204 | AN5768 |
| 269  | CONTIG98  | 470562 | 471051 | 2.68 | 8.43E-04 | transcription_start_site | + | 474607 | 474607 | -3800 | 23205 | AN5770 |
| 269  | CONTIG98  | 470562 | 471051 | 2.68 | 8.43E-04 | transcription_start_site | + | 474736 | 474736 | -3929 | 23206 | AN5770 |
| 269  | CONTIG98  | 470562 | 471051 | 2.68 | 8.43E-04 | transcription_start_site | + | 474855 | 474855 | -4048 | 23207 | AN5770 |
| 1054 | CONTIG98  | 477378 | 477667 | 1.67 | 3.01E-02 | transcription_start_site | - | 476734 | 476734 | -788  | 23208 | AN5771 |
| 175  | CONTIG98  | 500037 | 500391 | 2.89 | 2.51E-04 | transcription_start_site | + | 499778 | 499778 | 436   | 23219 | AN5775 |
| 175  | CONTIG98  | 500037 | 500391 | 2.89 | 2.51E-04 | transcription_start_site | + | 499202 | 499202 | 1012  | 23218 | AN5775 |
| 175  | CONTIG98  | 500037 | 500391 | 2.89 | 2.51E-04 | transcription_start_site | + | 500928 | 500928 | -714  | 23220 | AN5776 |
| 175  | CONTIG98  | 500037 | 500391 | 2.89 | 2.51E-04 | transcription_start_site | + | 503388 | 503388 | -3174 | 23221 | AN5776 |
| 175  | CONTIG98  | 500037 | 500391 | 2.89 | 2.51E-04 | transcription_start_site | + | 504078 | 504078 | -3864 | 23222 | AN5776 |
| 1837 | CONTIG98  | 510396 | 511178 | 1.05 | 9.04E-02 | transcription_start_site | - | 506406 | 506406 | -4381 | 23223 | AN5777 |
| 1837 | CONTIG98  | 510396 | 511178 | 1.05 | 9.04E-02 | transcription_start_site | - | 506065 | 506065 | -4722 | 23224 | AN5777 |
| 1837 | CONTIG98  | 510396 | 511178 | 1.05 | 9.04E-02 | transcription_start_site | - | 507964 | 507964 | -2823 | 23225 | AN5778 |
| 1837 | CONTIG98  | 510396 | 511178 | 1.05 | 9.04E-02 | transcription_start_site | - | 507690 | 507690 | -3097 | 23226 | AN5778 |
| 1837 | CONTIG98  | 510396 | 511178 | 1.05 | 9.04E-02 | transcription_start_site | - | 507038 | 507038 | -3749 | 23227 | AN5778 |
| 1837 | CONTIG98  | 510396 | 511178 | 1.05 | 9.04E-02 | transcription_start_site | - | 506748 | 506748 | -4039 | 23228 | AN5778 |
| 1837 | CONTIG98  | 510396 | 511178 | 1.05 | 9.04E-02 | transcription_start_site | + | 511649 | 511649 | -862  | 23232 | AN5780 |
| 853  | CONTIG98  | 544132 | 544416 | 1.88 | 1.54E-02 | transcription_start_site | + | 547450 | 547450 | -3176 | 23266 | AN5795 |
| 611  | CONTIG98  | 553126 | 553420 | 2.18 | 7.08E-03 | transcription_start_site | - | 553691 | 553691 | 418   | 23268 | AN5796 |
| 611  | CONTIG98  | 553126 | 553420 | 2.18 | 7.08E-03 | transcription_start_site | + | 555825 | 555825 | -2552 | 23269 | AN5797 |
| 611  | CONTIG98  | 553126 | 553420 | 2.18 | 7.08E-03 | transcription_start_site | + | 557171 | 557171 | -3898 | 23270 | AN5797 |
| 611  | CONTIG98  | 553126 | 553420 | 2.18 | 7.08E-03 | transcription_start_site | + | 558299 | 558299 | -5026 | 23271 | AN5797 |
| 636  | CONTIG100 | 15092  | 15516  | 2.13 | 7.70E-03 | transcription_start_site | - | 14743  | 14743  | -561  | 23296 | AN5803 |
| 636  | CONTIG100 | 15092  | 15516  | 2.13 | 7.70E-03 | transcription_start_site | - | 14630  | 14630  | -674  | 23297 | AN5803 |
| 636  | CONTIG100 | 15092  | 15516  | 2.13 | 7.70E-03 | transcription_start_site | - | 14361  | 14361  | -943  | 23298 | AN5803 |

|      |           |       |       |      |          |                          |   |       |       |       |       |        |
|------|-----------|-------|-------|------|----------|--------------------------|---|-------|-------|-------|-------|--------|
| 636  | CONTIG100 | 15092 | 15516 | 2.13 | 7.70E-03 | transcription_start_site | - | 13585 | 13585 | -1719 | 23299 | AN5803 |
| 636  | CONTIG100 | 15092 | 15516 | 2.13 | 7.70E-03 | transcription_start_site | - | 12541 | 12541 | -2763 | 23300 | AN5803 |
| 636  | CONTIG100 | 15092 | 15516 | 2.13 | 7.70E-03 | transcription_start_site | + | 15872 | 15872 | -568  | 23301 | AN5804 |
| 636  | CONTIG100 | 15092 | 15516 | 2.13 | 7.70E-03 | transcription_start_site | + | 16696 | 16696 | -1392 | 23302 | AN5804 |
| 636  | CONTIG100 | 15092 | 15516 | 2.13 | 7.70E-03 | transcription_start_site | + | 17359 | 17359 | -2055 | 23303 | AN5804 |
| 636  | CONTIG100 | 15092 | 15516 | 2.13 | 7.70E-03 | transcription_start_site | + | 17922 | 17922 | -2618 | 23304 | AN5804 |
| 636  | CONTIG100 | 15092 | 15516 | 2.13 | 7.70E-03 | transcription_start_site | + | 18062 | 18062 | -2758 | 23305 | AN5804 |
| 636  | CONTIG100 | 15092 | 15516 | 2.13 | 7.70E-03 | transcription_start_site | + | 18589 | 18589 | -3285 | 23306 | AN5804 |
| 1912 | CONTIG100 | 23028 | 23767 | 1    | 1.97E-01 | transcription_start_site | + | 24167 | 24167 | -769  | 23307 | AN5806 |
| 1912 | CONTIG100 | 23028 | 23767 | 1    | 1.97E-01 | transcription_start_site | + | 24512 | 24512 | -1114 | 23308 | AN5806 |
| 1912 | CONTIG100 | 23028 | 23767 | 1    | 1.97E-01 | transcription_start_site | + | 26381 | 26381 | -2983 | 23309 | AN5807 |
| 1912 | CONTIG100 | 23028 | 23767 | 1    | 1.97E-01 | transcription_start_site | + | 27129 | 27129 | -3731 | 23310 | AN5807 |
| 2044 | CONTIG100 | 39395 | 39889 | 0.92 | 1.81E-01 | transcription_start_site | - | 39267 | 39267 | -375  | 23319 | AN5811 |
| 2044 | CONTIG100 | 39395 | 39889 | 0.92 | 1.81E-01 | transcription_start_site | - | 39025 | 39025 | -617  | 23320 | AN5811 |
| 2044 | CONTIG100 | 39395 | 39889 | 0.92 | 1.81E-01 | transcription_start_site | - | 38764 | 38764 | -878  | 23321 | AN5811 |
| 2044 | CONTIG100 | 39395 | 39889 | 0.92 | 1.81E-01 | transcription_start_site | + | 40354 | 40354 | -712  | 23322 | AN5812 |
| 2044 | CONTIG100 | 39395 | 39889 | 0.92 | 1.81E-01 | transcription_start_site | + | 40740 | 40740 | -1098 | 23323 | AN5812 |
| 2044 | CONTIG100 | 39395 | 39889 | 0.92 | 1.81E-01 | transcription_start_site | + | 40895 | 40895 | -1253 | 23324 | AN5812 |
| 2044 | CONTIG100 | 39395 | 39889 | 0.92 | 1.81E-01 | transcription_start_site | + | 41177 | 41177 | -1535 | 23325 | AN5812 |
| 2044 | CONTIG100 | 39395 | 39889 | 0.92 | 1.81E-01 | transcription_start_site | + | 41347 | 41347 | -1705 | 23326 | AN5812 |
| 2044 | CONTIG100 | 39395 | 39889 | 0.92 | 1.81E-01 | transcription_start_site | + | 41552 | 41552 | -1910 | 23327 | AN5812 |
| 2044 | CONTIG100 | 39395 | 39889 | 0.92 | 1.81E-01 | transcription_start_site | + | 41736 | 41736 | -2094 | 23328 | AN5812 |
| 2044 | CONTIG100 | 39395 | 39889 | 0.92 | 1.81E-01 | transcription_start_site | + | 41812 | 41812 | -2170 | 23329 | AN5812 |
| 2044 | CONTIG100 | 39395 | 39889 | 0.92 | 1.81E-01 | transcription_start_site | + | 42094 | 42094 | -2452 | 23330 | AN5812 |
| 2044 | CONTIG100 | 39395 | 39889 | 0.92 | 1.81E-01 | transcription_start_site | + | 42636 | 42636 | -2994 | 23331 | AN5812 |
| 1012 | CONTIG100 | 50860 | 51219 | 1.71 | 2.63E-02 | transcription_start_site | - | 48613 | 48613 | -2426 | 23340 | AN5816 |
| 1012 | CONTIG100 | 50860 | 51219 | 1.71 | 2.63E-02 | transcription_start_site | - | 48310 | 48310 | -2729 | 23341 | AN5816 |
| 1012 | CONTIG100 | 50860 | 51219 | 1.71 | 2.63E-02 | transcription_start_site | - | 47985 | 47985 | -3054 | 23342 | AN5816 |
| 1013 | CONTIG100 | 53255 | 53534 | 1.71 | 2.63E-02 | transcription_start_site | - | 48613 | 48613 | -4781 | 23340 | AN5816 |
| 1013 | CONTIG100 | 53255 | 53534 | 1.71 | 2.63E-02 | transcription_start_site | - | 48310 | 48310 | -5084 | 23341 | AN5816 |
| 1012 | CONTIG100 | 50860 | 51219 | 1.71 | 2.63E-02 | transcription_start_site | - | 51266 | 51266 | 226   | 23348 | AN5818 |
| 1012 | CONTIG100 | 50860 | 51219 | 1.71 | 2.63E-02 | transcription_start_site | - | 50748 | 50748 | -291  | 23349 | AN5818 |
| 1013 | CONTIG100 | 53255 | 53534 | 1.71 | 2.63E-02 | transcription_start_site | - | 51266 | 51266 | -2128 | 23348 | AN5818 |
| 1013 | CONTIG100 | 53255 | 53534 | 1.71 | 2.63E-02 | transcription_start_site | - | 50748 | 50748 | -2646 | 23349 | AN5818 |
| 1012 | CONTIG100 | 50860 | 51219 | 1.71 | 2.63E-02 | transcription_start_site | + | 51768 | 51768 | -728  | 23350 | AN5819 |
| 1012 | CONTIG100 | 50860 | 51219 | 1.71 | 2.63E-02 | transcription_start_site | + | 52037 | 52037 | -997  | 23351 | AN5819 |
| 1013 | CONTIG100 | 53255 | 53534 | 1.71 | 2.63E-02 | transcription_start_site | - | 53741 | 53741 | 346   | 23355 | AN5820 |
| 1013 | CONTIG100 | 53255 | 53534 | 1.71 | 2.63E-02 | transcription_start_site | - | 54464 | 54464 | 1069  | 23354 | AN5820 |
| 1474 | CONTIG100 | 59188 | 59617 | 1.29 | 3.47E-02 | transcription_start_site | - | 54900 | 54900 | -4502 | 23352 | AN5820 |
| 1474 | CONTIG100 | 59188 | 59617 | 1.29 | 3.47E-02 | transcription_start_site | - | 54573 | 54573 | -4829 | 23353 | AN5820 |
| 1474 | CONTIG100 | 59188 | 59617 | 1.29 | 3.47E-02 | transcription_start_site | - | 54464 | 54464 | -4938 | 23354 | AN5820 |
| 1013 | CONTIG100 | 53255 | 53534 | 1.71 | 2.63E-02 | transcription_start_site | + | 56969 | 56969 | -3574 | 23356 | AN5821 |
| 1013 | CONTIG100 | 53255 | 53534 | 1.71 | 2.63E-02 | transcription_start_site | + | 57842 | 57842 | -4447 | 23357 | AN5821 |
| 1013 | CONTIG100 | 53255 | 53534 | 1.71 | 2.63E-02 | transcription_start_site | + | 58201 | 58201 | -4806 | 23358 | AN5821 |
| 1474 | CONTIG100 | 59188 | 59617 | 1.29 | 3.47E-02 | transcription_start_site | + | 58201 | 58201 | 1201  | 23358 | AN5821 |
| 1474 | CONTIG100 | 59188 | 59617 | 1.29 | 3.47E-02 | transcription_start_site | - | 60243 | 60243 | 840   | 23361 | AN5822 |
| 1857 | CONTIG100 | 86105 | 86466 | 1.04 | 1.15E-01 | transcription_start_site | - | 82441 | 82441 | -3844 | 23370 | AN5826 |
| 1857 | CONTIG100 | 86105 | 86466 | 1.04 | 1.15E-01 | transcription_start_site | - | 82187 | 82187 | -4098 | 23371 | AN5826 |
| 1857 | CONTIG100 | 86105 | 86466 | 1.04 | 1.15E-01 | transcription_start_site | - | 81963 | 81963 | -4322 | 23372 | AN5826 |
| 1857 | CONTIG100 | 86105 | 86466 | 1.04 | 1.15E-01 | transcription_start_site | - | 81631 | 81631 | -4654 | 23373 | AN5826 |
| 1857 | CONTIG100 | 86105 | 86466 | 1.04 | 1.15E-01 | transcription_start_site | + | 86449 | 86449 | -163  | 23376 | AN5828 |
| 1857 | CONTIG100 | 86105 | 86466 | 1.04 | 1.15E-01 | transcription_start_site | + | 86724 | 86724 | -438  | 23377 | AN5828 |
| 1051 | CONTIG100 | 92870 | 93294 | 1.67 | 3.01E-02 | transcription_start_site | - | 91060 | 91060 | -2022 | 23378 | AN5829 |
| 1051 | CONTIG100 | 92870 | 93294 | 1.67 | 3.01E-02 | transcription_start_site | - | 88024 | 88024 | -5058 | 23379 | AN5829 |
| 1858 | CONTIG100 | 93395 | 94126 | 1.04 | 1.15E-01 | transcription_start_site | - | 91060 | 91060 | -2700 | 23378 | AN5829 |
| 1051 | CONTIG100 | 92870 | 93294 | 1.67 | 3.01E-02 | transcription_start_site | + | 94174 | 94174 | -1092 | 23380 | AN5830 |
| 1858 | CONTIG100 | 93395 | 94126 | 1.04 | 1.15E-01 | transcription_start_site | + | 94174 | 94174 | -413  | 23380 | AN5830 |

|      |           |        |        |      |          |                          |   |        |        |       |       |        |
|------|-----------|--------|--------|------|----------|--------------------------|---|--------|--------|-------|-------|--------|
| 1051 | CONTIG100 | 92870  | 93294  | 1.67 | 3.01E-02 | transcription_start_site | + | 95256  | 95256  | -2174 | 23381 | AN5831 |
| 1051 | CONTIG100 | 92870  | 93294  | 1.67 | 3.01E-02 | transcription_start_site | + | 95310  | 95310  | -2228 | 23382 | AN5831 |
| 1051 | CONTIG100 | 92870  | 93294  | 1.67 | 3.01E-02 | transcription_start_site | + | 96261  | 96261  | -3179 | 23383 | AN5831 |
| 1858 | CONTIG100 | 93395  | 94126  | 1.04 | 1.15E-01 | transcription_start_site | + | 95256  | 95256  | -1495 | 23381 | AN5831 |
| 1858 | CONTIG100 | 93395  | 94126  | 1.04 | 1.15E-01 | transcription_start_site | + | 95310  | 95310  | -1549 | 23382 | AN5831 |
| 1858 | CONTIG100 | 93395  | 94126  | 1.04 | 1.15E-01 | transcription_start_site | + | 96261  | 96261  | -2500 | 23383 | AN5831 |
| 1658 | CONTIG100 | 98935  | 99210  | 1.17 | 1.22E-01 | transcription_start_site | + | 100831 | 100831 | -1758 | 23384 | AN5832 |
| 1658 | CONTIG100 | 98935  | 99210  | 1.17 | 1.22E-01 | transcription_start_site | + | 100972 | 100972 | -1899 | 23385 | AN5832 |
| 1658 | CONTIG100 | 98935  | 99210  | 1.17 | 1.22E-01 | transcription_start_site | + | 101476 | 101476 | -2403 | 23386 | AN5832 |
| 1658 | CONTIG100 | 98935  | 99210  | 1.17 | 1.22E-01 | transcription_start_site | + | 103177 | 103177 | -4104 | 23387 | AN5833 |
| 1658 | CONTIG100 | 98935  | 99210  | 1.17 | 1.22E-01 | transcription_start_site | + | 103614 | 103614 | -4541 | 23388 | AN5833 |
| 1658 | CONTIG100 | 98935  | 99210  | 1.17 | 1.22E-01 | transcription_start_site | + | 104059 | 104059 | -4986 | 23389 | AN5833 |
| 1321 | CONTIG100 | 111391 | 111725 | 1.42 | 3.02E-02 | transcription_start_site | - | 106502 | 106502 | -5056 | 23391 | AN5834 |
| 1597 | CONTIG100 | 106821 | 107320 | 1.21 | 1.08E-01 | transcription_start_site | - | 106502 | 106502 | -568  | 23391 | AN5834 |
| 1597 | CONTIG100 | 106821 | 107320 | 1.21 | 1.08E-01 | transcription_start_site | - | 106263 | 106263 | -807  | 23392 | AN5834 |
| 1597 | CONTIG100 | 106821 | 107320 | 1.21 | 1.08E-01 | transcription_start_site | - | 106075 | 106075 | -995  | 23393 | AN5834 |
| 1659 | CONTIG100 | 108011 | 108275 | 1.17 | 1.22E-01 | transcription_start_site | - | 106502 | 106502 | -1641 | 23391 | AN5834 |
| 1659 | CONTIG100 | 108011 | 108275 | 1.17 | 1.22E-01 | transcription_start_site | - | 106263 | 106263 | -1880 | 23392 | AN5834 |
| 1659 | CONTIG100 | 108011 | 108275 | 1.17 | 1.22E-01 | transcription_start_site | - | 106075 | 106075 | -2068 | 23393 | AN5834 |
| 274  | CONTIG100 | 119778 | 120140 | 2.67 | 8.43E-04 | transcription_start_site | + | 122060 | 122060 | -2101 | 23394 | AN5836 |
| 274  | CONTIG100 | 119778 | 120140 | 2.67 | 8.43E-04 | transcription_start_site | + | 122379 | 122379 | -2420 | 23395 | AN5836 |
| 274  | CONTIG100 | 119778 | 120140 | 2.67 | 8.43E-04 | transcription_start_site | + | 122621 | 122621 | -2662 | 23396 | AN5836 |
| 274  | CONTIG100 | 119778 | 120140 | 2.67 | 8.43E-04 | transcription_start_site | + | 122800 | 122800 | -2841 | 23397 | AN5836 |
| 1365 | CONTIG100 | 118663 | 119377 | 1.38 | 3.61E-02 | transcription_start_site | + | 122060 | 122060 | -3040 | 23394 | AN5836 |
| 1365 | CONTIG100 | 118663 | 119377 | 1.38 | 3.61E-02 | transcription_start_site | + | 122379 | 122379 | -3359 | 23395 | AN5836 |
| 1365 | CONTIG100 | 118663 | 119377 | 1.38 | 3.61E-02 | transcription_start_site | + | 122621 | 122621 | -3601 | 23396 | AN5836 |
| 1365 | CONTIG100 | 118663 | 119377 | 1.38 | 3.61E-02 | transcription_start_site | + | 122800 | 122800 | -3780 | 23397 | AN5836 |
| 274  | CONTIG100 | 119778 | 120140 | 2.67 | 8.43E-04 | transcription_start_site | + | 124906 | 124906 | -4947 | 23398 | AN5837 |
| 274  | CONTIG100 | 119778 | 120140 | 2.67 | 8.43E-04 | transcription_start_site | + | 125047 | 125047 | -5088 | 23399 | AN5837 |
| 1285 | CONTIG100 | 146036 | 146300 | 1.46 | 5.36E-02 | transcription_start_site | + | 147021 | 147021 | -853  | 23410 | AN5841 |
| 1285 | CONTIG100 | 146036 | 146300 | 1.46 | 5.36E-02 | transcription_start_site | + | 147230 | 147230 | -1062 | 23411 | AN5841 |
| 1285 | CONTIG100 | 146036 | 146300 | 1.46 | 5.36E-02 | transcription_start_site | + | 147513 | 147513 | -1345 | 23412 | AN5841 |
| 1285 | CONTIG100 | 146036 | 146300 | 1.46 | 5.36E-02 | transcription_start_site | + | 147814 | 147814 | -1646 | 23413 | AN5841 |
| 1285 | CONTIG100 | 146036 | 146300 | 1.46 | 5.36E-02 | transcription_start_site | + | 149695 | 149695 | -3527 | 23414 | AN5842 |
| 1285 | CONTIG100 | 146036 | 146300 | 1.46 | 5.36E-02 | transcription_start_site | + | 150029 | 150029 | -3861 | 23415 | AN5842 |
| 1285 | CONTIG100 | 146036 | 146300 | 1.46 | 5.36E-02 | transcription_start_site | + | 150372 | 150372 | -4204 | 23416 | AN5842 |
| 1285 | CONTIG100 | 146036 | 146300 | 1.46 | 5.36E-02 | transcription_start_site | + | 150472 | 150472 | -4304 | 23417 | AN5842 |
| 1083 | CONTIG100 | 154812 | 155451 | 1.63 | 1.61E-02 | transcription_start_site | - | 153888 | 153888 | -1243 | 23418 | AN5843 |
| 1083 | CONTIG100 | 154812 | 155451 | 1.63 | 1.61E-02 | transcription_start_site | - | 153586 | 153586 | -1545 | 23419 | AN5843 |
| 1083 | CONTIG100 | 154812 | 155451 | 1.63 | 1.61E-02 | transcription_start_site | + | 154683 | 154683 | 448   | 23422 | AN5844 |
| 1083 | CONTIG100 | 154812 | 155451 | 1.63 | 1.61E-02 | transcription_start_site | + | 154465 | 154465 | 666   | 23421 | AN5844 |
| 1083 | CONTIG100 | 154812 | 155451 | 1.63 | 1.61E-02 | transcription_start_site | + | 154138 | 154138 | 993   | 23420 | AN5844 |
| 1083 | CONTIG100 | 154812 | 155451 | 1.63 | 1.61E-02 | transcription_start_site | + | 155460 | 155460 | -328  | 23423 | AN5845 |
| 1083 | CONTIG100 | 154812 | 155451 | 1.63 | 1.61E-02 | transcription_start_site | + | 155675 | 155675 | -543  | 23424 | AN5845 |
| 1083 | CONTIG100 | 154812 | 155451 | 1.63 | 1.61E-02 | transcription_start_site | + | 156726 | 156726 | -1594 | 23425 | AN5846 |
| 1083 | CONTIG100 | 154812 | 155451 | 1.63 | 1.61E-02 | transcription_start_site | + | 156975 | 156975 | -1843 | 23426 | AN5846 |
| 1083 | CONTIG100 | 154812 | 155451 | 1.63 | 1.61E-02 | transcription_start_site | + | 158217 | 158217 | -3085 | 23427 | AN5846 |
| 662  | CONTIG100 | 160292 | 160781 | 2.09 | 3.99E-03 | transcription_start_site | - | 160265 | 160265 | -271  | 23428 | AN5847 |
| 662  | CONTIG100 | 160292 | 160781 | 2.09 | 3.99E-03 | transcription_start_site | - | 159892 | 159892 | -644  | 23429 | AN5847 |
| 662  | CONTIG100 | 160292 | 160781 | 2.09 | 3.99E-03 | transcription_start_site | + | 161237 | 161237 | -700  | 23430 | AN5848 |
| 662  | CONTIG100 | 160292 | 160781 | 2.09 | 3.99E-03 | transcription_start_site | + | 161354 | 161354 | -817  | 23431 | AN5848 |
| 662  | CONTIG100 | 160292 | 160781 | 2.09 | 3.99E-03 | transcription_start_site | + | 162792 | 162792 | -2255 | 23432 | AN5848 |
| 637  | CONTIG100 | 170944 | 171276 | 2.13 | 7.70E-03 | transcription_start_site | + | 173304 | 173304 | -2194 | 23433 | AN5849 |
| 637  | CONTIG100 | 170944 | 171276 | 2.13 | 7.70E-03 | transcription_start_site | + | 174066 | 174066 | -2956 | 23434 | AN5849 |
| 637  | CONTIG100 | 170944 | 171276 | 2.13 | 7.70E-03 | transcription_start_site | + | 174235 | 174235 | -3125 | 23435 | AN5849 |
| 637  | CONTIG100 | 170944 | 171276 | 2.13 | 7.70E-03 | transcription_start_site | + | 175712 | 175712 | -4602 | 23436 | AN5849 |
| 637  | CONTIG100 | 170944 | 171276 | 2.13 | 7.70E-03 | transcription_start_site | + | 175842 | 175842 | -4732 | 23437 | AN5849 |

|      |           |        |        |      |          |                          |   |        |        |       |       |        |
|------|-----------|--------|--------|------|----------|--------------------------|---|--------|--------|-------|-------|--------|
| 637  | CONTIG100 | 170944 | 171276 | 2.13 | 7.70E-03 | transcription_start_site | + | 176097 | 176097 | -4987 | 23438 | AN5849 |
| 585  | CONTIG100 | 194927 | 195281 | 2.21 | 6.24E-03 | transcription_start_site | + | 198112 | 198112 | -3008 | 23442 | AN5852 |
| 585  | CONTIG100 | 194927 | 195281 | 2.21 | 6.24E-03 | transcription_start_site | + | 198598 | 198598 | -3494 | 23443 | AN5852 |
| 75   | CONTIG100 | 204982 | 205562 | 3.17 | 0.00E+00 | transcription_start_site | - | 201180 | 201180 | -4092 | 23444 | AN5853 |
| 75   | CONTIG100 | 204982 | 205562 | 3.17 | 0.00E+00 | transcription_start_site | - | 200674 | 200674 | -4598 | 23445 | AN5853 |
| 75   | CONTIG100 | 204982 | 205562 | 3.17 | 0.00E+00 | transcription_start_site | - | 200614 | 200614 | -4658 | 23446 | AN5853 |
| 75   | CONTIG100 | 204982 | 205562 | 3.17 | 0.00E+00 | transcription_start_site | - | 200313 | 200313 | -4959 | 23447 | AN5853 |
| 75   | CONTIG100 | 204982 | 205562 | 3.17 | 0.00E+00 | transcription_start_site | - | 200117 | 200117 | -5155 | 23448 | AN5853 |
| 75   | CONTIG100 | 204982 | 205562 | 3.17 | 0.00E+00 | transcription_start_site | - | 204755 | 204755 | -517  | 23455 | AN5855 |
| 75   | CONTIG100 | 204982 | 205562 | 3.17 | 0.00E+00 | transcription_start_site | - | 204591 | 204591 | -681  | 23456 | AN5855 |
| 75   | CONTIG100 | 204982 | 205562 | 3.17 | 0.00E+00 | transcription_start_site | + | 206946 | 206946 | -1674 | 23457 | AN5856 |
| 75   | CONTIG100 | 204982 | 205562 | 3.17 | 0.00E+00 | transcription_start_site | + | 207388 | 207388 | -2116 | 23458 | AN5856 |
| 75   | CONTIG100 | 204982 | 205562 | 3.17 | 0.00E+00 | transcription_start_site | + | 209397 | 209397 | -4125 | 23459 | AN5856 |
| 75   | CONTIG100 | 204982 | 205562 | 3.17 | 0.00E+00 | transcription_start_site | + | 209656 | 209656 | -4384 | 23460 | AN5856 |
| 1713 | CONTIG100 | 209942 | 210501 | 1.13 | 8.54E-02 | transcription_start_site | + | 209656 | 209656 | 565   | 23460 | AN5856 |
| 1713 | CONTIG100 | 209942 | 210501 | 1.13 | 8.54E-02 | transcription_start_site | + | 209397 | 209397 | 824   | 23459 | AN5856 |
| 1713 | CONTIG100 | 209942 | 210501 | 1.13 | 8.54E-02 | transcription_start_site | + | 211293 | 211293 | -1071 | 23461 | AN5857 |
| 37   | CONTIG100 | 218718 | 219209 | 3.3  | 0.00E+00 | transcription_start_site | + | 220655 | 220655 | -1691 | 23462 | AN5859 |
| 37   | CONTIG100 | 218718 | 219209 | 3.3  | 0.00E+00 | transcription_start_site | + | 221131 | 221131 | -2167 | 23463 | AN5859 |
| 37   | CONTIG100 | 218718 | 219209 | 3.3  | 0.00E+00 | transcription_start_site | + | 221429 | 221429 | -2465 | 23464 | AN5859 |
| 2045 | CONTIG100 | 240166 | 240575 | 0.92 | 1.81E-01 | transcription_start_site | - | 238523 | 238523 | -1847 | 23486 | AN5865 |
| 2045 | CONTIG100 | 240166 | 240575 | 0.92 | 1.81E-01 | transcription_start_site | - | 238440 | 238440 | -1930 | 23487 | AN5865 |
| 2045 | CONTIG100 | 240166 | 240575 | 0.92 | 1.81E-01 | transcription_start_site | - | 238267 | 238267 | -2103 | 23488 | AN5865 |
| 2045 | CONTIG100 | 240166 | 240575 | 0.92 | 1.81E-01 | transcription_start_site | - | 238115 | 238115 | -2255 | 23489 | AN5865 |
| 2045 | CONTIG100 | 240166 | 240575 | 0.92 | 1.81E-01 | transcription_start_site | - | 236359 | 236359 | -4011 | 23490 | AN5865 |
| 2045 | CONTIG100 | 240166 | 240575 | 0.92 | 1.81E-01 | transcription_start_site | - | 240018 | 240018 | -352  | 23491 | AN5866 |
| 2045 | CONTIG100 | 240166 | 240575 | 0.92 | 1.81E-01 | transcription_start_site | - | 239575 | 239575 | -795  | 23492 | AN5866 |
| 2045 | CONTIG100 | 240166 | 240575 | 0.92 | 1.81E-01 | transcription_start_site | - | 239070 | 239070 | -1300 | 23493 | AN5866 |
| 2045 | CONTIG100 | 240166 | 240575 | 0.92 | 1.81E-01 | transcription_start_site | + | 242473 | 242473 | -2102 | 23494 | AN5867 |
| 2045 | CONTIG100 | 240166 | 240575 | 0.92 | 1.81E-01 | transcription_start_site | + | 242569 | 242569 | -2198 | 23495 | AN5867 |
| 2045 | CONTIG100 | 240166 | 240575 | 0.92 | 1.81E-01 | transcription_start_site | + | 242806 | 242806 | -2435 | 23496 | AN5867 |
| 2045 | CONTIG100 | 240166 | 240575 | 0.92 | 1.81E-01 | transcription_start_site | + | 244949 | 244949 | -4578 | 23497 | AN5868 |
| 2045 | CONTIG100 | 240166 | 240575 | 0.92 | 1.81E-01 | transcription_start_site | + | 245190 | 245190 | -4819 | 23498 | AN5868 |
| 2045 | CONTIG100 | 240166 | 240575 | 0.92 | 1.81E-01 | transcription_start_site | + | 245303 | 245303 | -4932 | 23499 | AN5868 |
| 510  | CONTIG100 | 250886 | 251231 | 2.3  | 4.57E-03 | transcription_start_site | + | 255700 | 255700 | -4641 | 23504 | AN5871 |
| 510  | CONTIG100 | 250886 | 251231 | 2.3  | 4.57E-03 | transcription_start_site | + | 256208 | 256208 | -5149 | 23505 | AN5871 |
| 548  | CONTIG100 | 262291 | 262705 | 2.25 | 2.65E-03 | transcription_start_site | - | 258584 | 258584 | -3914 | 23507 | AN5872 |
| 548  | CONTIG100 | 262291 | 262705 | 2.25 | 2.65E-03 | transcription_start_site | - | 258506 | 258506 | -3992 | 23508 | AN5872 |
| 548  | CONTIG100 | 262291 | 262705 | 2.25 | 2.65E-03 | transcription_start_site | - | 258427 | 258427 | -4071 | 23509 | AN5872 |
| 548  | CONTIG100 | 262291 | 262705 | 2.25 | 2.65E-03 | transcription_start_site | - | 258229 | 258229 | -4269 | 23510 | AN5872 |
| 548  | CONTIG100 | 262291 | 262705 | 2.25 | 2.65E-03 | transcription_start_site | - | 257775 | 257775 | -4723 | 23511 | AN5872 |
| 548  | CONTIG100 | 262291 | 262705 | 2.25 | 2.65E-03 | transcription_start_site | + | 261647 | 261647 | 851   | 23515 | AN5873 |
| 548  | CONTIG100 | 262291 | 262705 | 2.25 | 2.65E-03 | transcription_start_site | + | 261363 | 261363 | 1135  | 23514 | AN5873 |
| 548  | CONTIG100 | 262291 | 262705 | 2.25 | 2.65E-03 | transcription_start_site | + | 264477 | 264477 | -1979 | 23516 | AN5874 |
| 548  | CONTIG100 | 262291 | 262705 | 2.25 | 2.65E-03 | transcription_start_site | + | 264799 | 264799 | -2301 | 23517 | AN5874 |
| 548  | CONTIG100 | 262291 | 262705 | 2.25 | 2.65E-03 | transcription_start_site | + | 265006 | 265006 | -2508 | 23518 | AN5874 |
| 548  | CONTIG100 | 262291 | 262705 | 2.25 | 2.65E-03 | transcription_start_site | + | 265233 | 265233 | -2735 | 23519 | AN5874 |
| 548  | CONTIG100 | 262291 | 262705 | 2.25 | 2.65E-03 | transcription_start_site | + | 265477 | 265477 | -2979 | 23520 | AN5874 |
| 548  | CONTIG100 | 262291 | 262705 | 2.25 | 2.65E-03 | transcription_start_site | + | 265672 | 265672 | -3174 | 23521 | AN5874 |
| 1368 | CONTIG100 | 274201 | 274477 | 1.38 | 6.74E-02 | transcription_start_site | - | 271516 | 271516 | -2823 | 23525 | AN5876 |
| 1368 | CONTIG100 | 274201 | 274477 | 1.38 | 6.74E-02 | transcription_start_site | - | 271303 | 271303 | -3036 | 23526 | AN5876 |
| 1368 | CONTIG100 | 274201 | 274477 | 1.38 | 6.74E-02 | transcription_start_site | - | 271201 | 271201 | -3138 | 23527 | AN5876 |
| 1368 | CONTIG100 | 274201 | 274477 | 1.38 | 6.74E-02 | transcription_start_site | - | 270339 | 270339 | -4000 | 23528 | AN5876 |
| 1368 | CONTIG100 | 274201 | 274477 | 1.38 | 6.74E-02 | transcription_start_site | - | 270191 | 270191 | -4148 | 23529 | AN5876 |
| 1368 | CONTIG100 | 274201 | 274477 | 1.38 | 6.74E-02 | transcription_start_site | - | 273917 | 273917 | -422  | 23530 | AN5877 |
| 1368 | CONTIG100 | 274201 | 274477 | 1.38 | 6.74E-02 | transcription_start_site | - | 273569 | 273569 | -770  | 23531 | AN5877 |
| 1368 | CONTIG100 | 274201 | 274477 | 1.38 | 6.74E-02 | transcription_start_site | - | 273373 | 273373 | -966  | 23532 | AN5877 |



|      |           |        |        |      |          |                          |   |        |        |       |       |        |
|------|-----------|--------|--------|------|----------|--------------------------|---|--------|--------|-------|-------|--------|
| 1368 | CONTIG100 | 274201 | 274477 | 1.38 | 6.74E-02 | transcription_start_site | - | 272012 | 272012 | -2327 | 23533 | AN5877 |
| 1368 | CONTIG100 | 274201 | 274477 | 1.38 | 6.74E-02 | transcription_start_site | + | 274949 | 274949 | -610  | 23534 | AN5878 |
| 1368 | CONTIG100 | 274201 | 274477 | 1.38 | 6.74E-02 | transcription_start_site | + | 275107 | 275107 | -768  | 23535 | AN5878 |
| 1368 | CONTIG100 | 274201 | 274477 | 1.38 | 6.74E-02 | transcription_start_site | + | 275262 | 275262 | -923  | 23536 | AN5878 |
| 1368 | CONTIG100 | 274201 | 274477 | 1.38 | 6.74E-02 | transcription_start_site | + | 276163 | 276163 | -1824 | 23537 | AN5878 |
| 1368 | CONTIG100 | 274201 | 274477 | 1.38 | 6.74E-02 | transcription_start_site | + | 276275 | 276275 | -1936 | 23538 | AN5878 |
| 1368 | CONTIG100 | 274201 | 274477 | 1.38 | 6.74E-02 | transcription_start_site | + | 276442 | 276442 | -2103 | 23539 | AN5878 |
| 1368 | CONTIG100 | 274201 | 274477 | 1.38 | 6.74E-02 | transcription_start_site | + | 277004 | 277004 | -2665 | 23540 | AN5879 |
| 1368 | CONTIG100 | 274201 | 274477 | 1.38 | 6.74E-02 | transcription_start_site | + | 277269 | 277269 | -2930 | 23541 | AN5879 |
| 1368 | CONTIG100 | 274201 | 274477 | 1.38 | 6.74E-02 | transcription_start_site | + | 277547 | 277547 | -3208 | 23542 | AN5879 |
| 1368 | CONTIG100 | 274201 | 274477 | 1.38 | 6.74E-02 | transcription_start_site | + | 279364 | 279364 | -5025 | 23548 | AN5881 |
| 1014 | CONTIG100 | 290854 | 291301 | 1.71 | 2.63E-02 | transcription_start_site | - | 287164 | 287164 | -3913 | 23551 | AN5883 |
| 1014 | CONTIG100 | 290854 | 291301 | 1.71 | 2.63E-02 | transcription_start_site | - | 286289 | 286289 | -4788 | 23552 | AN5883 |
| 1014 | CONTIG100 | 290854 | 291301 | 1.71 | 2.63E-02 | transcription_start_site | + | 293102 | 293102 | -2024 | 23555 | AN5885 |
| 1014 | CONTIG100 | 290854 | 291301 | 1.71 | 2.63E-02 | transcription_start_site | + | 293511 | 293511 | -2433 | 23556 | AN5885 |
| 1014 | CONTIG100 | 290854 | 291301 | 1.71 | 2.63E-02 | transcription_start_site | + | 293739 | 293739 | -2661 | 23557 | AN5885 |
| 1014 | CONTIG100 | 290854 | 291301 | 1.71 | 2.63E-02 | transcription_start_site | + | 294236 | 294236 | -3158 | 23558 | AN5885 |
| 1660 | CONTIG100 | 313060 | 313491 | 1.17 | 1.22E-01 | transcription_start_site | + | 314120 | 314120 | -844  | 23575 | AN5891 |
| 1660 | CONTIG100 | 313060 | 313491 | 1.17 | 1.22E-01 | transcription_start_site | + | 317712 | 317712 | -4436 | 23576 | AN5892 |
| 131  | CONTIG100 | 325515 | 326019 | 3.01 | 0.00E+00 | transcription_start_site | + | 329870 | 329870 | -4103 | 23578 | AN5893 |
| 131  | CONTIG100 | 325515 | 326019 | 3.01 | 0.00E+00 | transcription_start_site | + | 330638 | 330638 | -4871 | 23579 | AN5893 |
| 251  | CONTIG100 | 328427 | 329226 | 2.71 | 8.35E-04 | transcription_start_site | + | 329870 | 329870 | -1043 | 23578 | AN5893 |
| 251  | CONTIG100 | 328427 | 329226 | 2.71 | 8.35E-04 | transcription_start_site | + | 330638 | 330638 | -1811 | 23579 | AN5893 |
| 251  | CONTIG100 | 328427 | 329226 | 2.71 | 8.35E-04 | transcription_start_site | + | 331827 | 331827 | -3000 | 23580 | AN5893 |
| 251  | CONTIG100 | 328427 | 329226 | 2.71 | 8.35E-04 | transcription_start_site | + | 332066 | 332066 | -3239 | 23581 | AN5893 |
| 459  | CONTIG100 | 324695 | 325330 | 2.38 | 3.37E-03 | transcription_start_site | + | 329870 | 329870 | -4857 | 23578 | AN5893 |
| 1325 | CONTIG100 | 326852 | 327951 | 1.42 | 6.04E-02 | transcription_start_site | + | 329870 | 329870 | -2468 | 23578 | AN5893 |
| 1325 | CONTIG100 | 326852 | 327951 | 1.42 | 6.04E-02 | transcription_start_site | + | 330638 | 330638 | -3236 | 23579 | AN5893 |
| 1325 | CONTIG100 | 326852 | 327951 | 1.42 | 6.04E-02 | transcription_start_site | + | 331827 | 331827 | -4425 | 23580 | AN5893 |
| 1325 | CONTIG100 | 326852 | 327951 | 1.42 | 6.04E-02 | transcription_start_site | + | 332066 | 332066 | -4664 | 23581 | AN5893 |
| 672  | CONTIG101 | 28965  | 29544  | 2.07 | 0.00E+00 | transcription_start_site | - | 24201  | 24201  | -5053 | 23621 | AN5905 |
| 672  | CONTIG101 | 28965  | 29544  | 2.07 | 0.00E+00 | transcription_start_site | - | 24039  | 24039  | -5215 | 23622 | AN5905 |
| 672  | CONTIG101 | 28965  | 29544  | 2.07 | 0.00E+00 | transcription_start_site | - | 27205  | 27205  | -2049 | 23626 | AN5906 |
| 672  | CONTIG101 | 28965  | 29544  | 2.07 | 0.00E+00 | transcription_start_site | - | 27050  | 27050  | -2204 | 23627 | AN5906 |
| 672  | CONTIG101 | 28965  | 29544  | 2.07 | 0.00E+00 | transcription_start_site | - | 26436  | 26436  | -2818 | 23628 | AN5906 |
| 672  | CONTIG101 | 28965  | 29544  | 2.07 | 0.00E+00 | transcription_start_site | - | 28619  | 28619  | -635  | 23629 | AN5907 |
| 672  | CONTIG101 | 28965  | 29544  | 2.07 | 0.00E+00 | transcription_start_site | + | 30450  | 30450  | -1195 | 23630 | AN5908 |
| 2090 | CONTIG101 | 52355  | 52860  | 0.89 | 1.97E-01 | transcription_start_site | - | 48987  | 48987  | -3620 | 23663 | AN5915 |
| 2090 | CONTIG101 | 52355  | 52860  | 0.89 | 1.97E-01 | transcription_start_site | - | 48832  | 48832  | -3775 | 23664 | AN5915 |
| 2090 | CONTIG101 | 52355  | 52860  | 0.89 | 1.97E-01 | transcription_start_site | - | 48642  | 48642  | -3965 | 23665 | AN5915 |
| 2090 | CONTIG101 | 52355  | 52860  | 0.89 | 1.97E-01 | transcription_start_site | - | 48238  | 48238  | -4369 | 23666 | AN5915 |
| 2090 | CONTIG101 | 52355  | 52860  | 0.89 | 1.97E-01 | transcription_start_site | - | 52385  | 52385  | -222  | 23671 | AN5917 |
| 2090 | CONTIG101 | 52355  | 52860  | 0.89 | 1.97E-01 | transcription_start_site | - | 52009  | 52009  | -598  | 23672 | AN5917 |
| 2090 | CONTIG101 | 52355  | 52860  | 0.89 | 1.97E-01 | transcription_start_site | + | 55016  | 55016  | -2408 | 23673 | AN5918 |
| 2090 | CONTIG101 | 52355  | 52860  | 0.89 | 1.97E-01 | transcription_start_site | + | 55091  | 55091  | -2483 | 23674 | AN5918 |
| 2090 | CONTIG101 | 52355  | 52860  | 0.89 | 1.97E-01 | transcription_start_site | + | 55191  | 55191  | -2583 | 23675 | AN5918 |
| 1569 | CONTIG101 | 65718  | 66143  | 1.22 | 6.74E-02 | transcription_start_site | - | 65545  | 65545  | -385  | 23680 | AN5921 |
| 1569 | CONTIG101 | 65718  | 66143  | 1.22 | 6.74E-02 | transcription_start_site | - | 65193  | 65193  | -737  | 23681 | AN5921 |
| 1569 | CONTIG101 | 65718  | 66143  | 1.22 | 6.74E-02 | transcription_start_site | - | 64033  | 64033  | -1897 | 23682 | AN5921 |
| 1569 | CONTIG101 | 65718  | 66143  | 1.22 | 6.74E-02 | transcription_start_site | - | 63752  | 63752  | -2178 | 23683 | AN5921 |
| 1570 | CONTIG101 | 88654  | 89078  | 1.22 | 6.74E-02 | transcription_start_site | - | 85207  | 85207  | -3659 | 23689 | AN5926 |
| 1570 | CONTIG101 | 88654  | 89078  | 1.22 | 6.74E-02 | transcription_start_site | - | 85051  | 85051  | -3815 | 23690 | AN5926 |
| 1570 | CONTIG101 | 88654  | 89078  | 1.22 | 6.74E-02 | transcription_start_site | - | 84576  | 84576  | -4290 | 23691 | AN5926 |
| 1570 | CONTIG101 | 88654  | 89078  | 1.22 | 6.74E-02 | transcription_start_site | - | 84362  | 84362  | -4504 | 23692 | AN5926 |
| 603  | CONTIG101 | 92794  | 93063  | 2.18 | 2.32E-03 | transcription_start_site | - | 88250  | 88250  | -4678 | 23693 | AN5927 |
| 1570 | CONTIG101 | 88654  | 89078  | 1.22 | 6.74E-02 | transcription_start_site | - | 88250  | 88250  | -616  | 23693 | AN5927 |
| 1570 | CONTIG101 | 88654  | 89078  | 1.22 | 6.74E-02 | transcription_start_site | - | 87561  | 87561  | -1305 | 23694 | AN5927 |

|      |           |        |        |      |          |                          |   |        |        |       |       |        |
|------|-----------|--------|--------|------|----------|--------------------------|---|--------|--------|-------|-------|--------|
| 1570 | CONTIG101 | 88654  | 89078  | 1.22 | 6.74E-02 | transcription_start_site | + | 88843  | 88843  | 23    | 23696 | AN5928 |
| 1570 | CONTIG101 | 88654  | 89078  | 1.22 | 6.74E-02 | transcription_start_site | + | 88763  | 88763  | 103   | 23695 | AN5928 |
| 1570 | CONTIG101 | 88654  | 89078  | 1.22 | 6.74E-02 | transcription_start_site | + | 89183  | 89183  | -317  | 23697 | AN5928 |
| 1570 | CONTIG101 | 88654  | 89078  | 1.22 | 6.74E-02 | transcription_start_site | + | 89269  | 89269  | -403  | 23698 | AN5928 |
| 571  | CONTIG101 | 96536  | 96965  | 2.22 | 1.77E-03 | transcription_start_site | - | 91881  | 91881  | -4869 | 23699 | AN5929 |
| 603  | CONTIG101 | 92794  | 93063  | 2.18 | 2.32E-03 | transcription_start_site | - | 91881  | 91881  | -1047 | 23699 | AN5929 |
| 603  | CONTIG101 | 92794  | 93063  | 2.18 | 2.32E-03 | transcription_start_site | - | 91448  | 91448  | -1480 | 23700 | AN5929 |
| 603  | CONTIG101 | 92794  | 93063  | 2.18 | 2.32E-03 | transcription_start_site | - | 91018  | 91018  | -1910 | 23701 | AN5929 |
| 603  | CONTIG101 | 92794  | 93063  | 2.18 | 2.32E-03 | transcription_start_site | - | 90658  | 90658  | -2270 | 23702 | AN5929 |
| 603  | CONTIG101 | 92794  | 93063  | 2.18 | 2.32E-03 | transcription_start_site | - | 90280  | 90280  | -2648 | 23703 | AN5929 |
| 603  | CONTIG101 | 92794  | 93063  | 2.18 | 2.32E-03 | transcription_start_site | - | 90163  | 90163  | -2765 | 23704 | AN5929 |
| 571  | CONTIG101 | 96536  | 96965  | 2.22 | 1.77E-03 | transcription_start_site | + | 97469  | 97469  | -718  | 23705 | AN5930 |
| 571  | CONTIG101 | 96536  | 96965  | 2.22 | 1.77E-03 | transcription_start_site | + | 97681  | 97681  | -930  | 23706 | AN5930 |
| 571  | CONTIG101 | 96536  | 96965  | 2.22 | 1.77E-03 | transcription_start_site | + | 97872  | 97872  | -1121 | 23707 | AN5930 |
| 571  | CONTIG101 | 96536  | 96965  | 2.22 | 1.77E-03 | transcription_start_site | + | 98104  | 98104  | -1353 | 23708 | AN5930 |
| 603  | CONTIG101 | 92794  | 93063  | 2.18 | 2.32E-03 | transcription_start_site | + | 97469  | 97469  | -4540 | 23705 | AN5930 |
| 603  | CONTIG101 | 92794  | 93063  | 2.18 | 2.32E-03 | transcription_start_site | + | 97681  | 97681  | -4752 | 23706 | AN5930 |
| 603  | CONTIG101 | 92794  | 93063  | 2.18 | 2.32E-03 | transcription_start_site | + | 97872  | 97872  | -4943 | 23707 | AN5930 |
| 1522 | CONTIG101 | 101946 | 102360 | 1.26 | 6.04E-02 | transcription_start_site | - | 101955 | 101955 | -198  | 23709 | AN5931 |
| 1522 | CONTIG101 | 101946 | 102360 | 1.26 | 6.04E-02 | transcription_start_site | - | 101664 | 101664 | -489  | 23710 | AN5931 |
| 1522 | CONTIG101 | 101946 | 102360 | 1.26 | 6.04E-02 | transcription_start_site | - | 101385 | 101385 | -768  | 23711 | AN5931 |
| 1522 | CONTIG101 | 101946 | 102360 | 1.26 | 6.04E-02 | transcription_start_site | - | 100365 | 100365 | -1788 | 23712 | AN5931 |
| 1522 | CONTIG101 | 101946 | 102360 | 1.26 | 6.04E-02 | transcription_start_site | - | 99735  | 99735  | -2418 | 23713 | AN5931 |
| 1522 | CONTIG101 | 101946 | 102360 | 1.26 | 6.04E-02 | transcription_start_site | - | 99554  | 99554  | -2599 | 23714 | AN5931 |
| 365  | CONTIG101 | 118894 | 119393 | 2.51 | 2.26E-04 | transcription_start_site | - | 115857 | 115857 | -3286 | 23722 | AN5934 |
| 365  | CONTIG101 | 118894 | 119393 | 2.51 | 2.26E-04 | transcription_start_site | - | 114503 | 114503 | -4640 | 23723 | AN5934 |
| 365  | CONTIG101 | 118894 | 119393 | 2.51 | 2.26E-04 | transcription_start_site | - | 114005 | 114005 | -5138 | 23724 | AN5934 |
| 365  | CONTIG101 | 118894 | 119393 | 2.51 | 2.26E-04 | transcription_start_site | - | 113904 | 113904 | -5239 | 23725 | AN5934 |
| 365  | CONTIG101 | 118894 | 119393 | 2.51 | 2.26E-04 | transcription_start_site | - | 118673 | 118673 | -470  | 23728 | AN5935 |
| 365  | CONTIG101 | 118894 | 119393 | 2.51 | 2.26E-04 | transcription_start_site | - | 118304 | 118304 | -839  | 23729 | AN5935 |
| 365  | CONTIG101 | 118894 | 119393 | 2.51 | 2.26E-04 | transcription_start_site | - | 118072 | 118072 | -1071 | 23730 | AN5935 |
| 365  | CONTIG101 | 118894 | 119393 | 2.51 | 2.26E-04 | transcription_start_site | - | 117879 | 117879 | -1264 | 23731 | AN5935 |
| 404  | CONTIG101 | 130669 | 131078 | 2.44 | 3.81E-04 | transcription_start_site | - | 127445 | 127445 | -3428 | 23732 | AN5936 |
| 404  | CONTIG101 | 130669 | 131078 | 2.44 | 3.81E-04 | transcription_start_site | - | 127288 | 127288 | -3585 | 23733 | AN5936 |
| 404  | CONTIG101 | 130669 | 131078 | 2.44 | 3.81E-04 | transcription_start_site | - | 127111 | 127111 | -3762 | 23734 | AN5936 |
| 404  | CONTIG101 | 130669 | 131078 | 2.44 | 3.81E-04 | transcription_start_site | - | 129661 | 129661 | -1212 | 23735 | AN5937 |
| 404  | CONTIG101 | 130669 | 131078 | 2.44 | 3.81E-04 | transcription_start_site | + | 131544 | 131544 | -670  | 23736 | AN5938 |
| 404  | CONTIG101 | 130669 | 131078 | 2.44 | 3.81E-04 | transcription_start_site | + | 131704 | 131704 | -830  | 23737 | AN5938 |
| 404  | CONTIG101 | 130669 | 131078 | 2.44 | 3.81E-04 | transcription_start_site | + | 132237 | 132237 | -1363 | 23738 | AN5938 |
| 404  | CONTIG101 | 130669 | 131078 | 2.44 | 3.81E-04 | transcription_start_site | + | 132433 | 132433 | -1559 | 23739 | AN5938 |
| 404  | CONTIG101 | 130669 | 131078 | 2.44 | 3.81E-04 | transcription_start_site | + | 132680 | 132680 | -1806 | 23740 | AN5938 |
| 1869 | CONTIG101 | 135234 | 135583 | 1.03 | 1.22E-01 | transcription_start_site | - | 135216 | 135216 | -192  | 23741 | AN5939 |
| 1869 | CONTIG101 | 135234 | 135583 | 1.03 | 1.22E-01 | transcription_start_site | - | 134997 | 134997 | -411  | 23742 | AN5939 |
| 2040 | CONTIG101 | 140180 | 140461 | 0.92 | 1.76E-01 | transcription_start_site | - | 135216 | 135216 | -5104 | 23741 | AN5939 |
| 2040 | CONTIG101 | 140180 | 140461 | 0.92 | 1.76E-01 | transcription_start_site | - | 138559 | 138559 | -1761 | 23743 | AN5940 |
| 2040 | CONTIG101 | 140180 | 140461 | 0.92 | 1.76E-01 | transcription_start_site | - | 138420 | 138420 | -1900 | 23744 | AN5940 |
| 2040 | CONTIG101 | 140180 | 140461 | 0.92 | 1.76E-01 | transcription_start_site | - | 138180 | 138180 | -2140 | 23745 | AN5940 |
| 601  | CONTIG101 | 149176 | 149757 | 2.18 | 1.20E-03 | transcription_start_site | - | 145929 | 145929 | -3537 | 23750 | AN5942 |
| 601  | CONTIG101 | 149176 | 149757 | 2.18 | 1.20E-03 | transcription_start_site | - | 145640 | 145640 | -3826 | 23751 | AN5942 |
| 514  | CONTIG101 | 153911 | 154265 | 2.29 | 1.45E-03 | transcription_start_site | - | 148998 | 148998 | -5090 | 23752 | AN5943 |
| 514  | CONTIG101 | 153911 | 154265 | 2.29 | 1.45E-03 | transcription_start_site | - | 148919 | 148919 | -5169 | 23753 | AN5943 |
| 601  | CONTIG101 | 149176 | 149757 | 2.18 | 1.20E-03 | transcription_start_site | - | 148998 | 148998 | -468  | 23752 | AN5943 |
| 601  | CONTIG101 | 149176 | 149757 | 2.18 | 1.20E-03 | transcription_start_site | - | 148919 | 148919 | -547  | 23753 | AN5943 |
| 601  | CONTIG101 | 149176 | 149757 | 2.18 | 1.20E-03 | transcription_start_site | - | 148696 | 148696 | -770  | 23754 | AN5943 |
| 601  | CONTIG101 | 149176 | 149757 | 2.18 | 1.20E-03 | transcription_start_site | - | 148547 | 148547 | -919  | 23755 | AN5943 |
| 601  | CONTIG101 | 149176 | 149757 | 2.18 | 1.20E-03 | transcription_start_site | - | 148274 | 148274 | -1192 | 23756 | AN5943 |
| 601  | CONTIG101 | 149176 | 149757 | 2.18 | 1.20E-03 | transcription_start_site | - | 148164 | 148164 | -1302 | 23757 | AN5943 |

|      |           |        |        |      |          |                          |   |        |        |       |       |        |
|------|-----------|--------|--------|------|----------|--------------------------|---|--------|--------|-------|-------|--------|
| 601  | CONTIG101 | 149176 | 149757 | 2.18 | 1.20E-03 | transcription_start_site | - | 147929 | 147929 | -1537 | 23758 | AN5943 |
| 514  | CONTIG101 | 153911 | 154265 | 2.29 | 1.45E-03 | transcription_start_site | - | 153810 | 153810 | -278  | 23759 | AN5944 |
| 514  | CONTIG101 | 153911 | 154265 | 2.29 | 1.45E-03 | transcription_start_site | - | 153160 | 153160 | -928  | 23760 | AN5944 |
| 514  | CONTIG101 | 153911 | 154265 | 2.29 | 1.45E-03 | transcription_start_site | - | 152017 | 152017 | -2071 | 23761 | AN5944 |
| 402  | CONTIG101 | 166503 | 167092 | 2.44 | 0.00E+00 | transcription_start_site | - | 165669 | 165669 | -1128 | 23766 | AN5947 |
| 402  | CONTIG101 | 166503 | 167092 | 2.44 | 0.00E+00 | transcription_start_site | - | 165428 | 165428 | -1369 | 23767 | AN5947 |
| 402  | CONTIG101 | 166503 | 167092 | 2.44 | 0.00E+00 | transcription_start_site | - | 164494 | 164494 | -2303 | 23768 | AN5947 |
| 402  | CONTIG101 | 166503 | 167092 | 2.44 | 0.00E+00 | transcription_start_site | - | 164059 | 164059 | -2738 | 23769 | AN5947 |
| 402  | CONTIG101 | 166503 | 167092 | 2.44 | 0.00E+00 | transcription_start_site | - | 163222 | 163222 | -3575 | 23770 | AN5947 |
| 402  | CONTIG101 | 166503 | 167092 | 2.44 | 0.00E+00 | transcription_start_site | - | 161796 | 161796 | -5001 | 23771 | AN5947 |
| 402  | CONTIG101 | 166503 | 167092 | 2.44 | 0.00E+00 | transcription_start_site | - | 161645 | 161645 | -5152 | 23772 | AN5947 |
| 402  | CONTIG101 | 166503 | 167092 | 2.44 | 0.00E+00 | transcription_start_site | + | 169790 | 169790 | -2992 | 23777 | AN5949 |
| 402  | CONTIG101 | 166503 | 167092 | 2.44 | 0.00E+00 | transcription_start_site | + | 169872 | 169872 | -3074 | 23778 | AN5949 |
| 2041 | CONTIG101 | 181510 | 182009 | 0.92 | 1.76E-01 | transcription_start_site | - | 177000 | 177000 | -4759 | 23789 | AN5952 |
| 2041 | CONTIG101 | 181510 | 182009 | 0.92 | 1.76E-01 | transcription_start_site | - | 176742 | 176742 | -5017 | 23790 | AN5952 |
| 845  | CONTIG101 | 185345 | 185679 | 1.88 | 7.70E-03 | transcription_start_site | - | 180869 | 180869 | -4643 | 23795 | AN5954 |
| 845  | CONTIG101 | 185345 | 185679 | 1.88 | 7.70E-03 | transcription_start_site | - | 180419 | 180419 | -5093 | 23796 | AN5954 |
| 2041 | CONTIG101 | 181510 | 182009 | 0.92 | 1.76E-01 | transcription_start_site | - | 180869 | 180869 | -890  | 23795 | AN5954 |
| 2041 | CONTIG101 | 181510 | 182009 | 0.92 | 1.76E-01 | transcription_start_site | - | 180419 | 180419 | -1340 | 23796 | AN5954 |
| 253  | CONTIG101 | 187735 | 188089 | 2.7  | 0.00E+00 | transcription_start_site | - | 184649 | 184649 | -3263 | 23797 | AN5955 |
| 253  | CONTIG101 | 187735 | 188089 | 2.7  | 0.00E+00 | transcription_start_site | - | 184425 | 184425 | -3487 | 23798 | AN5955 |
| 253  | CONTIG101 | 187735 | 188089 | 2.7  | 0.00E+00 | transcription_start_site | - | 183804 | 183804 | -4108 | 23799 | AN5955 |
| 253  | CONTIG101 | 187735 | 188089 | 2.7  | 0.00E+00 | transcription_start_site | - | 183573 | 183573 | -4339 | 23800 | AN5955 |
| 253  | CONTIG101 | 187735 | 188089 | 2.7  | 0.00E+00 | transcription_start_site | - | 183343 | 183343 | -4569 | 23801 | AN5955 |
| 253  | CONTIG101 | 187735 | 188089 | 2.7  | 0.00E+00 | transcription_start_site | - | 182935 | 182935 | -4977 | 23802 | AN5955 |
| 845  | CONTIG101 | 185345 | 185679 | 1.88 | 7.70E-03 | transcription_start_site | - | 184649 | 184649 | -863  | 23797 | AN5955 |
| 845  | CONTIG101 | 185345 | 185679 | 1.88 | 7.70E-03 | transcription_start_site | - | 184425 | 184425 | -1087 | 23798 | AN5955 |
| 845  | CONTIG101 | 185345 | 185679 | 1.88 | 7.70E-03 | transcription_start_site | - | 183804 | 183804 | -1708 | 23799 | AN5955 |
| 845  | CONTIG101 | 185345 | 185679 | 1.88 | 7.70E-03 | transcription_start_site | - | 183573 | 183573 | -1939 | 23800 | AN5955 |
| 845  | CONTIG101 | 185345 | 185679 | 1.88 | 7.70E-03 | transcription_start_site | - | 183343 | 183343 | -2169 | 23801 | AN5955 |
| 845  | CONTIG101 | 185345 | 185679 | 1.88 | 7.70E-03 | transcription_start_site | - | 182935 | 182935 | -2577 | 23802 | AN5955 |
| 2041 | CONTIG101 | 181510 | 182009 | 0.92 | 1.76E-01 | transcription_start_site | - | 182935 | 182935 | 1175  | 23802 | AN5955 |
| 253  | CONTIG101 | 187735 | 188089 | 2.7  | 0.00E+00 | transcription_start_site | - | 187883 | 187883 | -29   | 23804 | AN5956 |
| 253  | CONTIG101 | 187735 | 188089 | 2.7  | 0.00E+00 | transcription_start_site | - | 187725 | 187725 | -187  | 23805 | AN5956 |
| 253  | CONTIG101 | 187735 | 188089 | 2.7  | 0.00E+00 | transcription_start_site | - | 188173 | 188173 | 261   | 23803 | AN5956 |
| 253  | CONTIG101 | 187735 | 188089 | 2.7  | 0.00E+00 | transcription_start_site | - | 187362 | 187362 | -550  | 23806 | AN5956 |
| 253  | CONTIG101 | 187735 | 188089 | 2.7  | 0.00E+00 | transcription_start_site | + | 190469 | 190469 | -2557 | 23807 | AN5957 |
| 253  | CONTIG101 | 187735 | 188089 | 2.7  | 0.00E+00 | transcription_start_site | + | 190937 | 190937 | -3025 | 23808 | AN5957 |
| 253  | CONTIG101 | 187735 | 188089 | 2.7  | 0.00E+00 | transcription_start_site | + | 191598 | 191598 | -3686 | 23809 | AN5957 |
| 845  | CONTIG101 | 185345 | 185679 | 1.88 | 7.70E-03 | transcription_start_site | + | 190469 | 190469 | -4957 | 23807 | AN5957 |
| 2017 | CONTIG102 | 1276   | 2391   | 0.93 | 9.43E-02 | transcription_start_site | + | 628    | 628    | 1205  | 23830 | AN5964 |
| 435  | CONTIG102 | 5705   | 6661   | 2.41 | 1.09E-03 | transcription_start_site | - | 1622   | 1622   | -4561 | 23831 | AN5965 |
| 2017 | CONTIG102 | 1276   | 2391   | 0.93 | 9.43E-02 | transcription_start_site | - | 1622   | 1622   | -211  | 23831 | AN5965 |
| 7    | CONTIG102 | 7885   | 8835   | 3.55 | 0.00E+00 | transcription_start_site | - | 4871   | 4871   | -3489 | 23832 | AN5966 |
| 7    | CONTIG102 | 7885   | 8835   | 3.55 | 0.00E+00 | transcription_start_site | - | 4031   | 4031   | -4329 | 23833 | AN5966 |
| 7    | CONTIG102 | 7885   | 8835   | 3.55 | 0.00E+00 | transcription_start_site | - | 3223   | 3223   | -5137 | 23834 | AN5966 |
| 218  | CONTIG102 | 8926   | 9511   | 2.79 | 3.81E-04 | transcription_start_site | - | 4871   | 4871   | -4347 | 23832 | AN5966 |
| 218  | CONTIG102 | 8926   | 9511   | 2.79 | 3.81E-04 | transcription_start_site | - | 4031   | 4031   | -5187 | 23833 | AN5966 |
| 435  | CONTIG102 | 5705   | 6661   | 2.41 | 1.09E-03 | transcription_start_site | - | 4871   | 4871   | -1312 | 23832 | AN5966 |
| 435  | CONTIG102 | 5705   | 6661   | 2.41 | 1.09E-03 | transcription_start_site | - | 4031   | 4031   | -2152 | 23833 | AN5966 |
| 435  | CONTIG102 | 5705   | 6661   | 2.41 | 1.09E-03 | transcription_start_site | - | 3223   | 3223   | -2960 | 23834 | AN5966 |
| 2017 | CONTIG102 | 1276   | 2391   | 0.93 | 9.43E-02 | transcription_start_site | - | 3223   | 3223   | 1389  | 23834 | AN5966 |
| 7    | CONTIG102 | 7885   | 8835   | 3.55 | 0.00E+00 | transcription_start_site | + | 12859  | 12859  | -4499 | 23835 | AN5967 |
| 7    | CONTIG102 | 7885   | 8835   | 3.55 | 0.00E+00 | transcription_start_site | + | 13014  | 13014  | -4654 | 23836 | AN5967 |
| 218  | CONTIG102 | 8926   | 9511   | 2.79 | 3.81E-04 | transcription_start_site | + | 12859  | 12859  | -3640 | 23835 | AN5967 |
| 218  | CONTIG102 | 8926   | 9511   | 2.79 | 3.81E-04 | transcription_start_site | + | 13014  | 13014  | -3795 | 23836 | AN5967 |
| 7    | CONTIG102 | 7885   | 8835   | 3.55 | 0.00E+00 | transcription_start_site | + | 13807  | 13807  | -5447 | 23837 | AN5968 |

|      |           |        |        |      |          |                          |   |        |        |       |       |        |
|------|-----------|--------|--------|------|----------|--------------------------|---|--------|--------|-------|-------|--------|
| 218  | CONTIG102 | 8926   | 9511   | 2.79 | 3.81E-04 | transcription_start_site | + | 13807  | 13807  | -4588 | 23837 | AN5968 |
| 218  | CONTIG102 | 8926   | 9511   | 2.79 | 3.81E-04 | transcription_start_site | + | 14115  | 14115  | -4896 | 23838 | AN5968 |
| 218  | CONTIG102 | 8926   | 9511   | 2.79 | 3.81E-04 | transcription_start_site | + | 14279  | 14279  | -5060 | 23839 | AN5968 |
| 993  | CONTIG102 | 29181  | 29537  | 1.73 | 2.63E-02 | transcription_start_site | - | 28746  | 28746  | -613  | 23857 | AN5973 |
| 993  | CONTIG102 | 29181  | 29537  | 1.73 | 2.63E-02 | transcription_start_site | - | 28640  | 28640  | -719  | 23858 | AN5973 |
| 993  | CONTIG102 | 29181  | 29537  | 1.73 | 2.63E-02 | transcription_start_site | - | 28445  | 28445  | -914  | 23859 | AN5973 |
| 993  | CONTIG102 | 29181  | 29537  | 1.73 | 2.63E-02 | transcription_start_site | - | 27623  | 27623  | -1736 | 23860 | AN5973 |
| 993  | CONTIG102 | 29181  | 29537  | 1.73 | 2.63E-02 | transcription_start_site | - | 27157  | 27157  | -2202 | 23861 | AN5973 |
| 993  | CONTIG102 | 29181  | 29537  | 1.73 | 2.63E-02 | transcription_start_site | - | 26733  | 26733  | -2626 | 23862 | AN5973 |
| 910  | CONTIG102 | 34811  | 35242  | 1.82 | 2.05E-02 | transcription_start_site | - | 34330  | 34330  | -696  | 23863 | AN5975 |
| 562  | CONTIG102 | 79519  | 80018  | 2.24 | 6.24E-03 | transcription_start_site | - | 78551  | 78551  | -1217 | 23896 | AN5988 |
| 1899 | CONTIG102 | 80714  | 81228  | 1.01 | 1.97E-01 | transcription_start_site | - | 78551  | 78551  | -2420 | 23896 | AN5988 |
| 562  | CONTIG102 | 79519  | 80018  | 2.24 | 6.24E-03 | transcription_start_site | + | 81481  | 81481  | -1712 | 23897 | AN5989 |
| 562  | CONTIG102 | 79519  | 80018  | 2.24 | 6.24E-03 | transcription_start_site | + | 81809  | 81809  | -2040 | 23898 | AN5989 |
| 1899 | CONTIG102 | 80714  | 81228  | 1.01 | 1.97E-01 | transcription_start_site | + | 81481  | 81481  | -510  | 23897 | AN5989 |
| 1899 | CONTIG102 | 80714  | 81228  | 1.01 | 1.97E-01 | transcription_start_site | + | 81809  | 81809  | -838  | 23898 | AN5989 |
| 878  | CONTIG102 | 120092 | 120366 | 1.86 | 1.80E-02 | transcription_start_site | - | 115789 | 115789 | -4440 | 23935 | AN6002 |
| 878  | CONTIG102 | 120092 | 120366 | 1.86 | 1.80E-02 | transcription_start_site | - | 118398 | 118398 | -1831 | 23936 | AN6003 |
| 878  | CONTIG102 | 120092 | 120366 | 1.86 | 1.80E-02 | transcription_start_site | - | 118224 | 118224 | -2005 | 23937 | AN6003 |
| 878  | CONTIG102 | 120092 | 120366 | 1.86 | 1.80E-02 | transcription_start_site | + | 120404 | 120404 | -175  | 23938 | AN6004 |
| 878  | CONTIG102 | 120092 | 120366 | 1.86 | 1.80E-02 | transcription_start_site | + | 120537 | 120537 | -308  | 23939 | AN6004 |
| 878  | CONTIG102 | 120092 | 120366 | 1.86 | 1.80E-02 | transcription_start_site | + | 120687 | 120687 | -458  | 23940 | AN6004 |
| 1103 | CONTIG103 | 5101   | 5460   | 1.61 | 1.80E-02 | transcription_start_site | - | 3905   | 3905   | -1375 | 23958 | AN6009 |
| 1103 | CONTIG103 | 5101   | 5460   | 1.61 | 1.80E-02 | transcription_start_site | - | 3810   | 3810   | -1470 | 23959 | AN6009 |
| 1103 | CONTIG103 | 5101   | 5460   | 1.61 | 1.80E-02 | transcription_start_site | - | 3684   | 3684   | -1596 | 23960 | AN6009 |
| 1103 | CONTIG103 | 5101   | 5460   | 1.61 | 1.80E-02 | transcription_start_site | - | 3157   | 3157   | -2123 | 23961 | AN6009 |
| 1103 | CONTIG103 | 5101   | 5460   | 1.61 | 1.80E-02 | transcription_start_site | - | 1517   | 1517   | -3763 | 23962 | AN6009 |
| 1103 | CONTIG103 | 5101   | 5460   | 1.61 | 1.80E-02 | transcription_start_site | + | 5484   | 5484   | -203  | 23963 | AN6010 |
| 1103 | CONTIG103 | 5101   | 5460   | 1.61 | 1.80E-02 | transcription_start_site | + | 5569   | 5569   | -288  | 23964 | AN6010 |
| 1103 | CONTIG103 | 5101   | 5460   | 1.61 | 1.80E-02 | transcription_start_site | + | 5815   | 5815   | -534  | 23965 | AN6010 |
| 1357 | CONTIG103 | 9096   | 9355   | 1.39 | 3.70E-02 | transcription_start_site | - | 9287   | 9287   | 61    | 23966 | AN6011 |
| 1357 | CONTIG103 | 9096   | 9355   | 1.39 | 3.70E-02 | transcription_start_site | - | 9141   | 9141   | -84   | 23967 | AN6011 |
| 2102 | CONTIG103 | 11407  | 11676  | 0.88 | 1.97E-01 | transcription_start_site | - | 9287   | 9287   | -2254 | 23966 | AN6011 |
| 2102 | CONTIG103 | 11407  | 11676  | 0.88 | 1.97E-01 | transcription_start_site | - | 9141   | 9141   | -2400 | 23967 | AN6011 |
| 1357 | CONTIG103 | 9096   | 9355   | 1.39 | 3.70E-02 | transcription_start_site | + | 10852  | 10852  | -1626 | 23968 | AN6012 |
| 1357 | CONTIG103 | 9096   | 9355   | 1.39 | 3.70E-02 | transcription_start_site | + | 11310  | 11310  | -2084 | 23969 | AN6012 |
| 2102 | CONTIG103 | 11407  | 11676  | 0.88 | 1.97E-01 | transcription_start_site | + | 11310  | 11310  | 231   | 23969 | AN6012 |
| 2102 | CONTIG103 | 11407  | 11676  | 0.88 | 1.97E-01 | transcription_start_site | + | 10852  | 10852  | 689   | 23968 | AN6012 |
| 667  | CONTIG103 | 14482  | 14761  | 2.08 | 3.37E-03 | transcription_start_site | - | 13763  | 13763  | -858  | 23970 | AN6013 |
| 667  | CONTIG103 | 14482  | 14761  | 2.08 | 3.37E-03 | transcription_start_site | - | 13629  | 13629  | -992  | 23971 | AN6013 |
| 667  | CONTIG103 | 14482  | 14761  | 2.08 | 3.37E-03 | transcription_start_site | - | 13405  | 13405  | -1216 | 23972 | AN6013 |
| 667  | CONTIG103 | 14482  | 14761  | 2.08 | 3.37E-03 | transcription_start_site | + | 14994  | 14994  | -372  | 23973 | AN6014 |
| 667  | CONTIG103 | 14482  | 14761  | 2.08 | 3.37E-03 | transcription_start_site | + | 15487  | 15487  | -865  | 23974 | AN6014 |
| 667  | CONTIG103 | 14482  | 14761  | 2.08 | 3.37E-03 | transcription_start_site | + | 15585  | 15585  | -963  | 23975 | AN6014 |
| 667  | CONTIG103 | 14482  | 14761  | 2.08 | 3.37E-03 | transcription_start_site | + | 16029  | 16029  | -1407 | 23976 | AN6014 |
| 667  | CONTIG103 | 14482  | 14761  | 2.08 | 3.37E-03 | transcription_start_site | + | 17226  | 17226  | -2604 | 23977 | AN6014 |
| 2102 | CONTIG103 | 11407  | 11676  | 0.88 | 1.97E-01 | transcription_start_site | + | 14994  | 14994  | -3452 | 23973 | AN6014 |
| 2102 | CONTIG103 | 11407  | 11676  | 0.88 | 1.97E-01 | transcription_start_site | + | 15487  | 15487  | -3945 | 23974 | AN6014 |
| 2102 | CONTIG103 | 11407  | 11676  | 0.88 | 1.97E-01 | transcription_start_site | + | 15585  | 15585  | -4043 | 23975 | AN6014 |
| 2102 | CONTIG103 | 11407  | 11676  | 0.88 | 1.97E-01 | transcription_start_site | + | 16029  | 16029  | -4487 | 23976 | AN6014 |
| 282  | CONTIG103 | 27531  | 27875  | 2.66 | 0.00E+00 | transcription_start_site | - | 23366  | 23366  | -4337 | 23978 | AN6015 |
| 282  | CONTIG103 | 27531  | 27875  | 2.66 | 0.00E+00 | transcription_start_site | - | 23259  | 23259  | -4444 | 23979 | AN6015 |
| 282  | CONTIG103 | 27531  | 27875  | 2.66 | 0.00E+00 | transcription_start_site | - | 23170  | 23170  | -4533 | 23980 | AN6015 |
| 282  | CONTIG103 | 27531  | 27875  | 2.66 | 0.00E+00 | transcription_start_site | + | 29776  | 29776  | -2073 | 23981 | AN6016 |
| 282  | CONTIG103 | 27531  | 27875  | 2.66 | 0.00E+00 | transcription_start_site | + | 29931  | 29931  | -2228 | 23982 | AN6016 |
| 282  | CONTIG103 | 27531  | 27875  | 2.66 | 0.00E+00 | transcription_start_site | + | 30019  | 30019  | -2316 | 23983 | AN6016 |
| 282  | CONTIG103 | 27531  | 27875  | 2.66 | 0.00E+00 | transcription_start_site | + | 30142  | 30142  | -2439 | 23984 | AN6016 |

|      |           |        |        |      |          |                          |   |        |        |       |       |        |
|------|-----------|--------|--------|------|----------|--------------------------|---|--------|--------|-------|-------|--------|
| 282  | CONTIG103 | 27531  | 27875  | 2.66 | 0.00E+00 | transcription_start_site | + | 30251  | 30251  | -2548 | 23985 | AN6016 |
| 282  | CONTIG103 | 27531  | 27875  | 2.66 | 0.00E+00 | transcription_start_site | + | 30537  | 30537  | -2834 | 23986 | AN6016 |
| 378  | CONTIG104 | 40429  | 40793  | 2.48 | 7.97E-04 | transcription_start_site | - | 36338  | 36338  | -4273 | 24093 | AN6048 |
| 378  | CONTIG104 | 40429  | 40793  | 2.48 | 7.97E-04 | transcription_start_site | - | 35917  | 35917  | -4694 | 24094 | AN6048 |
| 1049 | CONTIG104 | 37146  | 37400  | 1.67 | 2.05E-02 | transcription_start_site | - | 36338  | 36338  | -935  | 24093 | AN6048 |
| 1049 | CONTIG104 | 37146  | 37400  | 1.67 | 2.05E-02 | transcription_start_site | - | 35917  | 35917  | -1356 | 24094 | AN6048 |
| 1049 | CONTIG104 | 37146  | 37400  | 1.67 | 2.05E-02 | transcription_start_site | - | 34881  | 34881  | -2392 | 24095 | AN6048 |
| 378  | CONTIG104 | 40429  | 40793  | 2.48 | 7.97E-04 | transcription_start_site | - | 39898  | 39898  | -713  | 24096 | AN6049 |
| 378  | CONTIG104 | 40429  | 40793  | 2.48 | 7.97E-04 | transcription_start_site | - | 39504  | 39504  | -1107 | 24097 | AN6049 |
| 378  | CONTIG104 | 40429  | 40793  | 2.48 | 7.97E-04 | transcription_start_site | - | 39025  | 39025  | -1586 | 24098 | AN6049 |
| 378  | CONTIG104 | 40429  | 40793  | 2.48 | 7.97E-04 | transcription_start_site | - | 38436  | 38436  | -2175 | 24099 | AN6049 |
| 1892 | CONTIG104 | 43504  | 44153  | 1.01 | 9.90E-02 | transcription_start_site | - | 39898  | 39898  | -3930 | 24096 | AN6049 |
| 1892 | CONTIG104 | 43504  | 44153  | 1.01 | 9.90E-02 | transcription_start_site | - | 39504  | 39504  | -4324 | 24097 | AN6049 |
| 1892 | CONTIG104 | 43504  | 44153  | 1.01 | 9.90E-02 | transcription_start_site | - | 39025  | 39025  | -4803 | 24098 | AN6049 |
| 378  | CONTIG104 | 40429  | 40793  | 2.48 | 7.97E-04 | transcription_start_site | + | 44840  | 44840  | -4229 | 24100 | AN6050 |
| 378  | CONTIG104 | 40429  | 40793  | 2.48 | 7.97E-04 | transcription_start_site | + | 45067  | 45067  | -4456 | 24101 | AN6050 |
| 378  | CONTIG104 | 40429  | 40793  | 2.48 | 7.97E-04 | transcription_start_site | + | 45452  | 45452  | -4841 | 24102 | AN6050 |
| 1892 | CONTIG104 | 43504  | 44153  | 1.01 | 9.90E-02 | transcription_start_site | + | 44840  | 44840  | -1011 | 24100 | AN6050 |
| 1892 | CONTIG104 | 43504  | 44153  | 1.01 | 9.90E-02 | transcription_start_site | + | 45067  | 45067  | -1238 | 24101 | AN6050 |
| 1892 | CONTIG104 | 43504  | 44153  | 1.01 | 9.90E-02 | transcription_start_site | + | 45452  | 45452  | -1623 | 24102 | AN6050 |
| 1892 | CONTIG104 | 43504  | 44153  | 1.01 | 9.90E-02 | transcription_start_site | + | 46121  | 46121  | -2292 | 24103 | AN6050 |
| 1892 | CONTIG104 | 43504  | 44153  | 1.01 | 9.90E-02 | transcription_start_site | + | 47688  | 47688  | -3859 | 24104 | AN6051 |
| 1221 | CONTIG104 | 52669  | 53018  | 1.51 | 3.34E-02 | transcription_start_site | + | 53484  | 53484  | -640  | 24111 | AN6053 |
| 290  | CONTIG104 | 68414  | 68841  | 2.64 | 0.00E+00 | transcription_start_site | - | 66406  | 66406  | -2221 | 24127 | AN6058 |
| 290  | CONTIG104 | 68414  | 68841  | 2.64 | 0.00E+00 | transcription_start_site | - | 66246  | 66246  | -2381 | 24128 | AN6058 |
| 290  | CONTIG104 | 68414  | 68841  | 2.64 | 0.00E+00 | transcription_start_site | + | 70038  | 70038  | -1410 | 24131 | AN6060 |
| 290  | CONTIG104 | 68414  | 68841  | 2.64 | 0.00E+00 | transcription_start_site | + | 70809  | 70809  | -2181 | 24132 | AN6060 |
| 906  | CONTIG104 | 81092  | 81367  | 1.82 | 1.25E-02 | transcription_start_site | - | 77798  | 77798  | -3431 | 24136 | AN6061 |
| 906  | CONTIG104 | 81092  | 81367  | 1.82 | 1.25E-02 | transcription_start_site | - | 77472  | 77472  | -3757 | 24137 | AN6061 |
| 906  | CONTIG104 | 81092  | 81367  | 1.82 | 1.25E-02 | transcription_start_site | - | 77029  | 77029  | -4200 | 24138 | AN6061 |
| 906  | CONTIG104 | 81092  | 81367  | 1.82 | 1.25E-02 | transcription_start_site | - | 81107  | 81107  | -122  | 24139 | AN6062 |
| 906  | CONTIG104 | 81092  | 81367  | 1.82 | 1.25E-02 | transcription_start_site | - | 80936  | 80936  | -293  | 24140 | AN6062 |
| 906  | CONTIG104 | 81092  | 81367  | 1.82 | 1.25E-02 | transcription_start_site | - | 80641  | 80641  | -588  | 24141 | AN6062 |
| 906  | CONTIG104 | 81092  | 81367  | 1.82 | 1.25E-02 | transcription_start_site | - | 80285  | 80285  | -944  | 24142 | AN6062 |
| 906  | CONTIG104 | 81092  | 81367  | 1.82 | 1.25E-02 | transcription_start_site | - | 79998  | 79998  | -1231 | 24143 | AN6062 |
| 906  | CONTIG104 | 81092  | 81367  | 1.82 | 1.25E-02 | transcription_start_site | - | 79802  | 79802  | -1427 | 24144 | AN6062 |
| 906  | CONTIG104 | 81092  | 81367  | 1.82 | 1.25E-02 | transcription_start_site | - | 79572  | 79572  | -1657 | 24145 | AN6062 |
| 906  | CONTIG104 | 81092  | 81367  | 1.82 | 1.25E-02 | transcription_start_site | - | 79142  | 79142  | -2087 | 24146 | AN6062 |
| 906  | CONTIG104 | 81092  | 81367  | 1.82 | 1.25E-02 | transcription_start_site | + | 83589  | 83589  | -2359 | 24147 | AN6063 |
| 906  | CONTIG104 | 81092  | 81367  | 1.82 | 1.25E-02 | transcription_start_site | + | 83793  | 83793  | -2563 | 24148 | AN6063 |
| 906  | CONTIG104 | 81092  | 81367  | 1.82 | 1.25E-02 | transcription_start_site | + | 84274  | 84274  | -3044 | 24149 | AN6063 |
| 906  | CONTIG104 | 81092  | 81367  | 1.82 | 1.25E-02 | transcription_start_site | + | 85077  | 85077  | -3847 | 24150 | AN6063 |
| 906  | CONTIG104 | 81092  | 81367  | 1.82 | 1.25E-02 | transcription_start_site | + | 85559  | 85559  | -4329 | 24151 | AN6064 |
| 906  | CONTIG104 | 81092  | 81367  | 1.82 | 1.25E-02 | transcription_start_site | + | 85735  | 85735  | -4505 | 24152 | AN6064 |
| 906  | CONTIG104 | 81092  | 81367  | 1.82 | 1.25E-02 | transcription_start_site | + | 85834  | 85834  | -4604 | 24153 | AN6064 |
| 906  | CONTIG104 | 81092  | 81367  | 1.82 | 1.25E-02 | transcription_start_site | + | 85967  | 85967  | -4737 | 24154 | AN6064 |
| 966  | CONTIG104 | 107927 | 108276 | 1.75 | 1.54E-02 | transcription_start_site | - | 106120 | 106120 | -1981 | 24168 | AN6070 |
| 966  | CONTIG104 | 107927 | 108276 | 1.75 | 1.54E-02 | transcription_start_site | - | 106059 | 106059 | -2042 | 24169 | AN6070 |
| 966  | CONTIG104 | 107927 | 108276 | 1.75 | 1.54E-02 | transcription_start_site | - | 105310 | 105310 | -2791 | 24170 | AN6070 |
| 966  | CONTIG104 | 107927 | 108276 | 1.75 | 1.54E-02 | transcription_start_site | - | 105089 | 105089 | -3012 | 24171 | AN6070 |
| 966  | CONTIG104 | 107927 | 108276 | 1.75 | 1.54E-02 | transcription_start_site | - | 104808 | 104808 | -3293 | 24172 | AN6070 |
| 966  | CONTIG104 | 107927 | 108276 | 1.75 | 1.54E-02 | transcription_start_site | + | 108979 | 108979 | -877  | 24173 | AN6071 |
| 966  | CONTIG104 | 107927 | 108276 | 1.75 | 1.54E-02 | transcription_start_site | + | 109207 | 109207 | -1105 | 24174 | AN6071 |
| 2253 | CONTIG104 | 144017 | 144818 | 0.74 | 1.67E-01 | transcription_start_site | - | 139449 | 139449 | -4968 | 24194 | AN6080 |
| 2253 | CONTIG104 | 144017 | 144818 | 0.74 | 1.67E-01 | transcription_start_site | - | 139025 | 139025 | -5392 | 24195 | AN6080 |
| 2253 | CONTIG104 | 144017 | 144818 | 0.74 | 1.67E-01 | transcription_start_site | - | 142044 | 142044 | -2373 | 24196 | AN6081 |
| 2253 | CONTIG104 | 144017 | 144818 | 0.74 | 1.67E-01 | transcription_start_site | - | 141336 | 141336 | -3081 | 24197 | AN6081 |

|      |           |        |        |      |          |                          |   |        |        |       |       |        |
|------|-----------|--------|--------|------|----------|--------------------------|---|--------|--------|-------|-------|--------|
| 2253 | CONTIG104 | 144017 | 144818 | 0.74 | 1.67E-01 | transcription_start_site | + | 143565 | 143565 | 852   | 24201 | AN6082 |
| 2253 | CONTIG104 | 144017 | 144818 | 0.74 | 1.67E-01 | transcription_start_site | + | 143349 | 143349 | 1068  | 24200 | AN6082 |
| 2253 | CONTIG104 | 144017 | 144818 | 0.74 | 1.67E-01 | transcription_start_site | + | 143238 | 143238 | 1179  | 24199 | AN6082 |
| 2253 | CONTIG104 | 144017 | 144818 | 0.74 | 1.67E-01 | transcription_start_site | + | 143102 | 143102 | 1315  | 24198 | AN6082 |
| 2253 | CONTIG104 | 144017 | 144818 | 0.74 | 1.67E-01 | transcription_start_site | + | 144342 | 144342 | 75    | 24203 | AN6083 |
| 2253 | CONTIG104 | 144017 | 144818 | 0.74 | 1.67E-01 | transcription_start_site | + | 144605 | 144605 | -187  | 24204 | AN6083 |
| 2253 | CONTIG104 | 144017 | 144818 | 0.74 | 1.67E-01 | transcription_start_site | + | 144099 | 144099 | 318   | 24202 | AN6083 |
| 935  | CONTIG104 | 149494 | 149753 | 1.79 | 1.37E-02 | transcription_start_site | - | 148413 | 148413 | -1210 | 24205 | AN6084 |
| 935  | CONTIG104 | 149494 | 149753 | 1.79 | 1.37E-02 | transcription_start_site | - | 149945 | 149945 | 321   | 24207 | AN6085 |
| 935  | CONTIG104 | 149494 | 149753 | 1.79 | 1.37E-02 | transcription_start_site | + | 154722 | 154722 | -5098 | 24210 | AN6087 |
| 1252 | CONTIG104 | 169586 | 169869 | 1.48 | 3.70E-02 | transcription_start_site | + | 170432 | 170432 | -704  | 24234 | AN6091 |
| 1252 | CONTIG104 | 169586 | 169869 | 1.48 | 3.70E-02 | transcription_start_site | + | 171234 | 171234 | -1506 | 24235 | AN6091 |
| 1252 | CONTIG104 | 169586 | 169869 | 1.48 | 3.70E-02 | transcription_start_site | + | 171549 | 171549 | -1821 | 24236 | AN6091 |
| 1252 | CONTIG104 | 169586 | 169869 | 1.48 | 3.70E-02 | transcription_start_site | + | 171737 | 171737 | -2009 | 24237 | AN6091 |
| 1252 | CONTIG104 | 169586 | 169869 | 1.48 | 3.70E-02 | transcription_start_site | + | 171893 | 171893 | -2165 | 24238 | AN6091 |
| 1896 | CONTIG104 | 183378 | 183819 | 1.01 | 1.54E-01 | transcription_start_site | - | 182443 | 182443 | -1155 | 24248 | AN6095 |
| 1896 | CONTIG104 | 183378 | 183819 | 1.01 | 1.54E-01 | transcription_start_site | - | 181846 | 181846 | -1752 | 24249 | AN6095 |
| 1896 | CONTIG104 | 183378 | 183819 | 1.01 | 1.54E-01 | transcription_start_site | - | 181650 | 181650 | -1948 | 24250 | AN6095 |
| 1896 | CONTIG104 | 183378 | 183819 | 1.01 | 1.54E-01 | transcription_start_site | - | 181414 | 181414 | -2184 | 24251 | AN6095 |
| 1896 | CONTIG104 | 183378 | 183819 | 1.01 | 1.54E-01 | transcription_start_site | - | 181014 | 181014 | -2584 | 24252 | AN6095 |
| 1896 | CONTIG104 | 183378 | 183819 | 1.01 | 1.54E-01 | transcription_start_site | + | 186260 | 186260 | -2661 | 24257 | AN6097 |
| 1896 | CONTIG104 | 183378 | 183819 | 1.01 | 1.54E-01 | transcription_start_site | + | 186548 | 186548 | -2949 | 24258 | AN6097 |
| 1896 | CONTIG104 | 183378 | 183819 | 1.01 | 1.54E-01 | transcription_start_site | + | 186726 | 186726 | -3127 | 24259 | AN6097 |
| 1896 | CONTIG104 | 183378 | 183819 | 1.01 | 1.54E-01 | transcription_start_site | + | 187069 | 187069 | -3470 | 24260 | AN6097 |
| 1896 | CONTIG104 | 183378 | 183819 | 1.01 | 1.54E-01 | transcription_start_site | + | 187976 | 187976 | -4377 | 24261 | AN6098 |
| 1896 | CONTIG104 | 183378 | 183819 | 1.01 | 1.54E-01 | transcription_start_site | + | 188470 | 188470 | -4871 | 24262 | AN6098 |
| 15   | CONTIG104 | 208882 | 209384 | 3.49 | 0.00E+00 | transcription_start_site | - | 204490 | 204490 | -4643 | 24280 | AN6103 |
| 15   | CONTIG104 | 208882 | 209384 | 3.49 | 0.00E+00 | transcription_start_site | - | 204312 | 204312 | -4821 | 24281 | AN6103 |
| 379  | CONTIG104 | 207227 | 207656 | 2.48 | 7.97E-04 | transcription_start_site | - | 204490 | 204490 | -2951 | 24280 | AN6103 |
| 379  | CONTIG104 | 207227 | 207656 | 2.48 | 7.97E-04 | transcription_start_site | - | 204312 | 204312 | -3129 | 24281 | AN6103 |
| 379  | CONTIG104 | 207227 | 207656 | 2.48 | 7.97E-04 | transcription_start_site | - | 203569 | 203569 | -3872 | 24282 | AN6103 |
| 379  | CONTIG104 | 207227 | 207656 | 2.48 | 7.97E-04 | transcription_start_site | - | 203094 | 203094 | -4347 | 24283 | AN6103 |
| 379  | CONTIG104 | 207227 | 207656 | 2.48 | 7.97E-04 | transcription_start_site | - | 202943 | 202943 | -4498 | 24284 | AN6103 |
| 379  | CONTIG104 | 207227 | 207656 | 2.48 | 7.97E-04 | transcription_start_site | - | 202880 | 202880 | -4561 | 24285 | AN6103 |
| 15   | CONTIG104 | 208882 | 209384 | 3.49 | 0.00E+00 | transcription_start_site | + | 209866 | 209866 | -733  | 24286 | AN6104 |
| 379  | CONTIG104 | 207227 | 207656 | 2.48 | 7.97E-04 | transcription_start_site | + | 209866 | 209866 | -2424 | 24286 | AN6104 |
| 2079 | CONTIG104 | 210303 | 211403 | 0.89 | 3.10E-02 | transcription_start_site | + | 209866 | 209866 | 987   | 24286 | AN6104 |
| 15   | CONTIG104 | 208882 | 209384 | 3.49 | 0.00E+00 | transcription_start_site | + | 214001 | 214001 | -4868 | 24287 | AN6105 |
| 723  | CONTIG104 | 213313 | 213663 | 2.02 | 7.08E-03 | transcription_start_site | + | 214001 | 214001 | -513  | 24287 | AN6105 |
| 723  | CONTIG104 | 213313 | 213663 | 2.02 | 7.08E-03 | transcription_start_site | + | 214418 | 214418 | -930  | 24288 | AN6105 |
| 2079 | CONTIG104 | 210303 | 211403 | 0.89 | 3.10E-02 | transcription_start_site | + | 214001 | 214001 | -3148 | 24287 | AN6105 |
| 2079 | CONTIG104 | 210303 | 211403 | 0.89 | 3.10E-02 | transcription_start_site | + | 214418 | 214418 | -3565 | 24288 | AN6105 |
| 360  | CONTIG104 | 221934 | 222353 | 2.52 | 7.06E-04 | transcription_start_site | + | 222253 | 222253 | -109  | 24293 | AN6107 |
| 360  | CONTIG104 | 221934 | 222353 | 2.52 | 7.06E-04 | transcription_start_site | + | 224884 | 224884 | -2740 | 24294 | AN6107 |
| 396  | CONTIG104 | 248036 | 248473 | 2.45 | 1.09E-03 | transcription_start_site | - | 243291 | 243291 | -4963 | 24324 | AN6116 |
| 396  | CONTIG104 | 248036 | 248473 | 2.45 | 1.09E-03 | transcription_start_site | + | 248999 | 248999 | -744  | 24327 | AN6118 |
| 396  | CONTIG104 | 248036 | 248473 | 2.45 | 1.09E-03 | transcription_start_site | + | 249194 | 249194 | -939  | 24328 | AN6118 |
| 396  | CONTIG104 | 248036 | 248473 | 2.45 | 1.09E-03 | transcription_start_site | + | 249415 | 249415 | -1160 | 24329 | AN6118 |
| 396  | CONTIG104 | 248036 | 248473 | 2.45 | 1.09E-03 | transcription_start_site | + | 249638 | 249638 | -1383 | 24330 | AN6118 |
| 762  | CONTIG104 | 253515 | 254379 | 1.98 | 3.81E-03 | transcription_start_site | - | 253419 | 253419 | -528  | 24331 | AN6119 |
| 762  | CONTIG104 | 253515 | 254379 | 1.98 | 3.81E-03 | transcription_start_site | - | 252973 | 252973 | -974  | 24332 | AN6119 |
| 762  | CONTIG104 | 253515 | 254379 | 1.98 | 3.81E-03 | transcription_start_site | + | 255057 | 255057 | -1110 | 24333 | AN6120 |
| 762  | CONTIG104 | 253515 | 254379 | 1.98 | 3.81E-03 | transcription_start_site | + | 255524 | 255524 | -1577 | 24334 | AN6120 |
| 762  | CONTIG104 | 253515 | 254379 | 1.98 | 3.81E-03 | transcription_start_site | + | 256821 | 256821 | -2874 | 24335 | AN6120 |
| 1775 | CONTIG104 | 250970 | 251244 | 1.09 | 1.22E-01 | transcription_start_site | + | 255057 | 255057 | -3950 | 24333 | AN6120 |
| 1775 | CONTIG104 | 250970 | 251244 | 1.09 | 1.22E-01 | transcription_start_site | + | 255524 | 255524 | -4417 | 24334 | AN6120 |
| 614  | CONTIG104 | 270690 | 271044 | 2.17 | 4.01E-03 | transcription_start_site | - | 267342 | 267342 | -3525 | 24341 | AN6123 |



|      |           |        |        |      |          |                          |   |        |        |       |       |        |
|------|-----------|--------|--------|------|----------|--------------------------|---|--------|--------|-------|-------|--------|
| 614  | CONTIG104 | 270690 | 271044 | 2.17 | 4.01E-03 | transcription_start_site | - | 269789 | 269789 | -1078 | 24342 | AN6124 |
| 614  | CONTIG104 | 270690 | 271044 | 2.17 | 4.01E-03 | transcription_start_site | - | 269613 | 269613 | -1254 | 24343 | AN6124 |
| 614  | CONTIG104 | 270690 | 271044 | 2.17 | 4.01E-03 | transcription_start_site | - | 269136 | 269136 | -1731 | 24344 | AN6124 |
| 614  | CONTIG104 | 270690 | 271044 | 2.17 | 4.01E-03 | transcription_start_site | - | 268957 | 268957 | -1910 | 24345 | AN6124 |
| 614  | CONTIG104 | 270690 | 271044 | 2.17 | 4.01E-03 | transcription_start_site | + | 271321 | 271321 | -454  | 24346 | AN6125 |
| 614  | CONTIG104 | 270690 | 271044 | 2.17 | 4.01E-03 | transcription_start_site | + | 271619 | 271619 | -752  | 24347 | AN6125 |
| 397  | CONTIG104 | 274876 | 275766 | 2.45 | 1.09E-03 | transcription_start_site | + | 276453 | 276453 | -1132 | 24348 | AN6126 |
| 397  | CONTIG104 | 274876 | 275766 | 2.45 | 1.09E-03 | transcription_start_site | + | 276693 | 276693 | -1372 | 24349 | AN6126 |
| 397  | CONTIG104 | 274876 | 275766 | 2.45 | 1.09E-03 | transcription_start_site | + | 276934 | 276934 | -1613 | 24350 | AN6126 |
| 685  | CONTIG105 | 91654  | 92078  | 2.07 | 1.25E-02 | transcription_start_site | - | 87385  | 87385  | -4481 | 24438 | AN6155 |
| 685  | CONTIG105 | 91654  | 92078  | 2.07 | 1.25E-02 | transcription_start_site | - | 86745  | 86745  | -5121 | 24439 | AN6155 |
| 1186 | CONTIG105 | 92194  | 92693  | 1.54 | 5.36E-02 | transcription_start_site | - | 87385  | 87385  | -5058 | 24438 | AN6155 |
| 685  | CONTIG105 | 91654  | 92078  | 2.07 | 1.25E-02 | transcription_start_site | - | 90268  | 90268  | -1598 | 24440 | AN6156 |
| 685  | CONTIG105 | 91654  | 92078  | 2.07 | 1.25E-02 | transcription_start_site | - | 90025  | 90025  | -1841 | 24441 | AN6156 |
| 1186 | CONTIG105 | 92194  | 92693  | 1.54 | 5.36E-02 | transcription_start_site | - | 90268  | 90268  | -2175 | 24440 | AN6156 |
| 1186 | CONTIG105 | 92194  | 92693  | 1.54 | 5.36E-02 | transcription_start_site | - | 90025  | 90025  | -2418 | 24441 | AN6156 |
| 685  | CONTIG105 | 91654  | 92078  | 2.07 | 1.25E-02 | transcription_start_site | - | 92333  | 92333  | 467   | 24443 | AN6157 |
| 685  | CONTIG105 | 91654  | 92078  | 2.07 | 1.25E-02 | transcription_start_site | - | 92549  | 92549  | 683   | 24442 | AN6157 |
| 1186 | CONTIG105 | 92194  | 92693  | 1.54 | 5.36E-02 | transcription_start_site | - | 92549  | 92549  | 105   | 24442 | AN6157 |
| 1186 | CONTIG105 | 92194  | 92693  | 1.54 | 5.36E-02 | transcription_start_site | - | 92333  | 92333  | -110  | 24443 | AN6157 |
| 1699 | CONTIG105 | 95634  | 96058  | 1.14 | 1.54E-01 | transcription_start_site | - | 92549  | 92549  | -3297 | 24442 | AN6157 |
| 1699 | CONTIG105 | 95634  | 96058  | 1.14 | 1.54E-01 | transcription_start_site | - | 92333  | 92333  | -3513 | 24443 | AN6157 |
| 1186 | CONTIG105 | 92194  | 92693  | 1.54 | 5.36E-02 | transcription_start_site | - | 93107  | 93107  | 663   | 24446 | AN6158 |
| 1186 | CONTIG105 | 92194  | 92693  | 1.54 | 5.36E-02 | transcription_start_site | - | 93283  | 93283  | 839   | 24445 | AN6158 |
| 1186 | CONTIG105 | 92194  | 92693  | 1.54 | 5.36E-02 | transcription_start_site | - | 93418  | 93418  | 974   | 24444 | AN6158 |
| 1699 | CONTIG105 | 95634  | 96058  | 1.14 | 1.54E-01 | transcription_start_site | - | 93418  | 93418  | -2428 | 24444 | AN6158 |
| 1699 | CONTIG105 | 95634  | 96058  | 1.14 | 1.54E-01 | transcription_start_site | - | 93283  | 93283  | -2563 | 24445 | AN6158 |
| 1699 | CONTIG105 | 95634  | 96058  | 1.14 | 1.54E-01 | transcription_start_site | - | 93107  | 93107  | -2739 | 24446 | AN6158 |
| 1699 | CONTIG105 | 95634  | 96058  | 1.14 | 1.54E-01 | transcription_start_site | - | 95307  | 95307  | -539  | 24447 | AN6159 |
| 1699 | CONTIG105 | 95634  | 96058  | 1.14 | 1.54E-01 | transcription_start_site | - | 95120  | 95120  | -726  | 24448 | AN6159 |
| 1699 | CONTIG105 | 95634  | 96058  | 1.14 | 1.54E-01 | transcription_start_site | - | 95028  | 95028  | -818  | 24449 | AN6159 |
| 1699 | CONTIG105 | 95634  | 96058  | 1.14 | 1.54E-01 | transcription_start_site | - | 93987  | 93987  | -1859 | 24450 | AN6159 |
| 685  | CONTIG105 | 91654  | 92078  | 2.07 | 1.25E-02 | transcription_start_site | + | 96169  | 96169  | -4303 | 24451 | AN6160 |
| 685  | CONTIG105 | 91654  | 92078  | 2.07 | 1.25E-02 | transcription_start_site | + | 96298  | 96298  | -4432 | 24452 | AN6160 |
| 685  | CONTIG105 | 91654  | 92078  | 2.07 | 1.25E-02 | transcription_start_site | + | 96471  | 96471  | -4605 | 24453 | AN6160 |
| 685  | CONTIG105 | 91654  | 92078  | 2.07 | 1.25E-02 | transcription_start_site | + | 96798  | 96798  | -4932 | 24454 | AN6160 |
| 1186 | CONTIG105 | 92194  | 92693  | 1.54 | 5.36E-02 | transcription_start_site | + | 96169  | 96169  | -3725 | 24451 | AN6160 |
| 1186 | CONTIG105 | 92194  | 92693  | 1.54 | 5.36E-02 | transcription_start_site | + | 96298  | 96298  | -3854 | 24452 | AN6160 |
| 1186 | CONTIG105 | 92194  | 92693  | 1.54 | 5.36E-02 | transcription_start_site | + | 96471  | 96471  | -4027 | 24453 | AN6160 |
| 1186 | CONTIG105 | 92194  | 92693  | 1.54 | 5.36E-02 | transcription_start_site | + | 96798  | 96798  | -4354 | 24454 | AN6160 |
| 1699 | CONTIG105 | 95634  | 96058  | 1.14 | 1.54E-01 | transcription_start_site | + | 96169  | 96169  | -323  | 24451 | AN6160 |
| 1699 | CONTIG105 | 95634  | 96058  | 1.14 | 1.54E-01 | transcription_start_site | + | 96298  | 96298  | -452  | 24452 | AN6160 |
| 1699 | CONTIG105 | 95634  | 96058  | 1.14 | 1.54E-01 | transcription_start_site | + | 96471  | 96471  | -625  | 24453 | AN6160 |
| 1699 | CONTIG105 | 95634  | 96058  | 1.14 | 1.54E-01 | transcription_start_site | + | 96798  | 96798  | -952  | 24454 | AN6160 |
| 1699 | CONTIG105 | 95634  | 96058  | 1.14 | 1.54E-01 | transcription_start_site | + | 99106  | 99106  | -3260 | 24455 | AN6161 |
| 1699 | CONTIG105 | 95634  | 96058  | 1.14 | 1.54E-01 | transcription_start_site | + | 99250  | 99250  | -3404 | 24456 | AN6161 |
| 1699 | CONTIG105 | 95634  | 96058  | 1.14 | 1.54E-01 | transcription_start_site | + | 100303 | 100303 | -4457 | 24457 | AN6161 |
| 1699 | CONTIG105 | 95634  | 96058  | 1.14 | 1.54E-01 | transcription_start_site | + | 100804 | 100804 | -4958 | 24458 | AN6161 |
| 343  | CONTIG105 | 103521 | 103860 | 2.55 | 2.61E-03 | transcription_start_site | - | 102504 | 102504 | -1186 | 24459 | AN6162 |
| 343  | CONTIG105 | 103521 | 103860 | 2.55 | 2.61E-03 | transcription_start_site | - | 101624 | 101624 | -2066 | 24460 | AN6162 |
| 343  | CONTIG105 | 103521 | 103860 | 2.55 | 2.61E-03 | transcription_start_site | - | 103673 | 103673 | -17   | 24463 | AN6163 |
| 343  | CONTIG105 | 103521 | 103860 | 2.55 | 2.61E-03 | transcription_start_site | - | 103850 | 103850 | 159   | 24462 | AN6163 |
| 343  | CONTIG105 | 103521 | 103860 | 2.55 | 2.61E-03 | transcription_start_site | - | 103930 | 103930 | 239   | 24461 | AN6163 |
| 343  | CONTIG105 | 103521 | 103860 | 2.55 | 2.61E-03 | transcription_start_site | + | 104758 | 104758 | -1067 | 24464 | AN6164 |
| 343  | CONTIG105 | 103521 | 103860 | 2.55 | 2.61E-03 | transcription_start_site | + | 105442 | 105442 | -1751 | 24465 | AN6164 |
| 343  | CONTIG105 | 103521 | 103860 | 2.55 | 2.61E-03 | transcription_start_site | + | 105650 | 105650 | -1959 | 24466 | AN6164 |
| 343  | CONTIG105 | 103521 | 103860 | 2.55 | 2.61E-03 | transcription_start_site | + | 108430 | 108430 | -4739 | 24467 | AN6164 |

|      |           |        |        |      |          |                          |   |        |        |       |       |        |
|------|-----------|--------|--------|------|----------|--------------------------|---|--------|--------|-------|-------|--------|
| 343  | CONTIG105 | 103521 | 103860 | 2.55 | 2.61E-03 | transcription_start_site | + | 108647 | 108647 | -4956 | 24468 | AN6164 |
| 343  | CONTIG105 | 103521 | 103860 | 2.55 | 2.61E-03 | transcription_start_site | + | 108856 | 108856 | -5165 | 24469 | AN6164 |
| 270  | CONTIG105 | 123920 | 124254 | 2.68 | 1.62E-03 | transcription_start_site | - | 120204 | 120204 | -3883 | 24482 | AN6167 |
| 270  | CONTIG105 | 123920 | 124254 | 2.68 | 1.62E-03 | transcription_start_site | - | 120033 | 120033 | -4054 | 24483 | AN6167 |
| 270  | CONTIG105 | 123920 | 124254 | 2.68 | 1.62E-03 | transcription_start_site | - | 119463 | 119463 | -4624 | 24484 | AN6167 |
| 270  | CONTIG105 | 123920 | 124254 | 2.68 | 1.62E-03 | transcription_start_site | - | 119155 | 119155 | -4932 | 24485 | AN6167 |
| 422  | CONTIG105 | 124290 | 125014 | 2.42 | 1.41E-03 | transcription_start_site | - | 120204 | 120204 | -4448 | 24482 | AN6167 |
| 422  | CONTIG105 | 124290 | 125014 | 2.42 | 1.41E-03 | transcription_start_site | - | 120033 | 120033 | -4619 | 24483 | AN6167 |
| 422  | CONTIG105 | 124290 | 125014 | 2.42 | 1.41E-03 | transcription_start_site | - | 119463 | 119463 | -5189 | 24484 | AN6167 |
| 1295 | CONTIG105 | 120765 | 121035 | 1.45 | 6.74E-02 | transcription_start_site | - | 120204 | 120204 | -696  | 24482 | AN6167 |
| 1295 | CONTIG105 | 120765 | 121035 | 1.45 | 6.74E-02 | transcription_start_site | - | 120033 | 120033 | -867  | 24483 | AN6167 |
| 1295 | CONTIG105 | 120765 | 121035 | 1.45 | 6.74E-02 | transcription_start_site | - | 119463 | 119463 | -1437 | 24484 | AN6167 |
| 1295 | CONTIG105 | 120765 | 121035 | 1.45 | 6.74E-02 | transcription_start_site | - | 119155 | 119155 | -1745 | 24485 | AN6167 |
| 1295 | CONTIG105 | 120765 | 121035 | 1.45 | 6.74E-02 | transcription_start_site | - | 118734 | 118734 | -2166 | 24486 | AN6167 |
| 270  | CONTIG105 | 123920 | 124254 | 2.68 | 1.62E-03 | transcription_start_site | - | 123800 | 123800 | -287  | 24487 | AN6168 |
| 270  | CONTIG105 | 123920 | 124254 | 2.68 | 1.62E-03 | transcription_start_site | - | 123491 | 123491 | -596  | 24488 | AN6168 |
| 270  | CONTIG105 | 123920 | 124254 | 2.68 | 1.62E-03 | transcription_start_site | - | 123335 | 123335 | -752  | 24489 | AN6168 |
| 270  | CONTIG105 | 123920 | 124254 | 2.68 | 1.62E-03 | transcription_start_site | - | 123164 | 123164 | -923  | 24490 | AN6168 |
| 270  | CONTIG105 | 123920 | 124254 | 2.68 | 1.62E-03 | transcription_start_site | - | 123024 | 123024 | -1063 | 24491 | AN6168 |
| 270  | CONTIG105 | 123920 | 124254 | 2.68 | 1.62E-03 | transcription_start_site | - | 122613 | 122613 | -1474 | 24492 | AN6168 |
| 270  | CONTIG105 | 123920 | 124254 | 2.68 | 1.62E-03 | transcription_start_site | - | 121445 | 121445 | -2642 | 24493 | AN6168 |
| 422  | CONTIG105 | 124290 | 125014 | 2.42 | 1.41E-03 | transcription_start_site | - | 123800 | 123800 | -852  | 24487 | AN6168 |
| 422  | CONTIG105 | 124290 | 125014 | 2.42 | 1.41E-03 | transcription_start_site | - | 123491 | 123491 | -1161 | 24488 | AN6168 |
| 422  | CONTIG105 | 124290 | 125014 | 2.42 | 1.41E-03 | transcription_start_site | - | 123335 | 123335 | -1317 | 24489 | AN6168 |
| 422  | CONTIG105 | 124290 | 125014 | 2.42 | 1.41E-03 | transcription_start_site | - | 123164 | 123164 | -1488 | 24490 | AN6168 |
| 422  | CONTIG105 | 124290 | 125014 | 2.42 | 1.41E-03 | transcription_start_site | - | 123024 | 123024 | -1628 | 24491 | AN6168 |
| 422  | CONTIG105 | 124290 | 125014 | 2.42 | 1.41E-03 | transcription_start_site | - | 122613 | 122613 | -2039 | 24492 | AN6168 |
| 422  | CONTIG105 | 124290 | 125014 | 2.42 | 1.41E-03 | transcription_start_site | - | 121445 | 121445 | -3207 | 24493 | AN6168 |
| 1295 | CONTIG105 | 120765 | 121035 | 1.45 | 6.74E-02 | transcription_start_site | - | 121445 | 121445 | 545   | 24493 | AN6168 |
| 270  | CONTIG105 | 123920 | 124254 | 2.68 | 1.62E-03 | transcription_start_site | + | 126296 | 126296 | -2209 | 24494 | AN6169 |
| 270  | CONTIG105 | 123920 | 124254 | 2.68 | 1.62E-03 | transcription_start_site | + | 126744 | 126744 | -2657 | 24495 | AN6169 |
| 422  | CONTIG105 | 124290 | 125014 | 2.42 | 1.41E-03 | transcription_start_site | + | 126296 | 126296 | -1644 | 24494 | AN6169 |
| 422  | CONTIG105 | 124290 | 125014 | 2.42 | 1.41E-03 | transcription_start_site | + | 126744 | 126744 | -2092 | 24495 | AN6169 |
| 270  | CONTIG105 | 123920 | 124254 | 2.68 | 1.62E-03 | transcription_start_site | + | 129108 | 129108 | -5021 | 24496 | AN6170 |
| 422  | CONTIG105 | 124290 | 125014 | 2.42 | 1.41E-03 | transcription_start_site | + | 129108 | 129108 | -4456 | 24496 | AN6170 |
| 422  | CONTIG105 | 124290 | 125014 | 2.42 | 1.41E-03 | transcription_start_site | + | 129339 | 129339 | -4687 | 24497 | AN6170 |
| 960  | CONTIG105 | 133805 | 134154 | 1.76 | 3.01E-02 | transcription_start_site | - | 132900 | 132900 | -1079 | 24501 | AN6172 |
| 1763 | CONTIG105 | 136520 | 137008 | 1.1  | 1.76E-01 | transcription_start_site | - | 132900 | 132900 | -3864 | 24501 | AN6172 |
| 1763 | CONTIG105 | 136520 | 137008 | 1.1  | 1.76E-01 | transcription_start_site | - | 136600 | 136600 | -164  | 24502 | AN6173 |
| 1763 | CONTIG105 | 136520 | 137008 | 1.1  | 1.76E-01 | transcription_start_site | - | 136292 | 136292 | -472  | 24503 | AN6173 |
| 1763 | CONTIG105 | 136520 | 137008 | 1.1  | 1.76E-01 | transcription_start_site | - | 135487 | 135487 | -1277 | 24504 | AN6173 |
| 1763 | CONTIG105 | 136520 | 137008 | 1.1  | 1.76E-01 | transcription_start_site | - | 137239 | 137239 | 475   | 24506 | AN6174 |
| 960  | CONTIG105 | 133805 | 134154 | 1.76 | 3.01E-02 | transcription_start_site | + | 139062 | 139062 | -5082 | 24507 | AN6175 |
| 960  | CONTIG105 | 133805 | 134154 | 1.76 | 3.01E-02 | transcription_start_site | + | 139151 | 139151 | -5171 | 24508 | AN6175 |
| 1763 | CONTIG105 | 136520 | 137008 | 1.1  | 1.76E-01 | transcription_start_site | + | 139062 | 139062 | -2298 | 24507 | AN6175 |
| 1763 | CONTIG105 | 136520 | 137008 | 1.1  | 1.76E-01 | transcription_start_site | + | 139151 | 139151 | -2387 | 24508 | AN6175 |
| 1763 | CONTIG105 | 136520 | 137008 | 1.1  | 1.76E-01 | transcription_start_site | + | 141865 | 141865 | -5101 | 24512 | AN6177 |
| 1763 | CONTIG105 | 136520 | 137008 | 1.1  | 1.76E-01 | transcription_start_site | + | 141929 | 141929 | -5165 | 24513 | AN6177 |
| 103  | CONTIG105 | 173555 | 173844 | 3.08 | 2.69E-04 | transcription_start_site | - | 174405 | 174405 | 705   | 24561 | AN6192 |
| 1439 | CONTIG105 | 174470 | 174825 | 1.32 | 9.60E-02 | transcription_start_site | - | 174405 | 174405 | -242  | 24561 | AN6192 |
| 104  | CONTIG105 | 189979 | 190553 | 3.08 | 2.69E-04 | transcription_start_site | - | 188429 | 188429 | -1837 | 24565 | AN6195 |
| 1090 | CONTIG105 | 192239 | 192813 | 1.63 | 4.20E-02 | transcription_start_site | - | 188429 | 188429 | -4097 | 24565 | AN6195 |
| 1757 | CONTIG105 | 188331 | 188981 | 1.1  | 1.15E-01 | transcription_start_site | - | 188429 | 188429 | -227  | 24565 | AN6195 |
| 227  | CONTIG105 | 196894 | 197303 | 2.77 | 1.09E-03 | transcription_start_site | + | 198753 | 198753 | -1654 | 24566 | AN6196 |
| 227  | CONTIG105 | 196894 | 197303 | 2.77 | 1.09E-03 | transcription_start_site | + | 199090 | 199090 | -1991 | 24567 | AN6196 |
| 291  | CONTIG105 | 195094 | 196028 | 2.64 | 0.00E+00 | transcription_start_site | + | 198753 | 198753 | -3192 | 24566 | AN6196 |
| 291  | CONTIG105 | 195094 | 196028 | 2.64 | 0.00E+00 | transcription_start_site | + | 199090 | 199090 | -3529 | 24567 | AN6196 |

|      |           |        |        |      |          |                          |   |        |        |       |       |        |
|------|-----------|--------|--------|------|----------|--------------------------|---|--------|--------|-------|-------|--------|
| 1497 | CONTIG105 | 198239 | 198656 | 1.28 | 1.08E-01 | transcription_start_site | + | 198753 | 198753 | -305  | 24566 | AN6196 |
| 1497 | CONTIG105 | 198239 | 198656 | 1.28 | 1.08E-01 | transcription_start_site | + | 199090 | 199090 | -642  | 24567 | AN6196 |
| 1497 | CONTIG105 | 198239 | 198656 | 1.28 | 1.08E-01 | transcription_start_site | + | 203425 | 203425 | -4977 | 24571 | AN6198 |
| 686  | CONTIG105 | 213995 | 214629 | 2.07 | 1.25E-02 | transcription_start_site | - | 213169 | 213169 | -1143 | 24579 | AN6201 |
| 686  | CONTIG105 | 213995 | 214629 | 2.07 | 1.25E-02 | transcription_start_site | - | 212557 | 212557 | -1755 | 24580 | AN6201 |
| 340  | CONTIG105 | 219694 | 220859 | 2.55 | 0.00E+00 | transcription_start_site | + | 225737 | 225737 | -5460 | 24581 | AN6202 |
| 340  | CONTIG105 | 219694 | 220859 | 2.55 | 0.00E+00 | transcription_start_site | + | 225812 | 225812 | -5535 | 24582 | AN6202 |
| 885  | CONTIG105 | 242043 | 242920 | 1.85 | 2.29E-02 | transcription_start_site | - | 237916 | 237916 | -4565 | 24589 | AN6205 |
| 885  | CONTIG105 | 242043 | 242920 | 1.85 | 2.29E-02 | transcription_start_site | - | 237801 | 237801 | -4680 | 24590 | AN6205 |
| 885  | CONTIG105 | 242043 | 242920 | 1.85 | 2.29E-02 | transcription_start_site | - | 237648 | 237648 | -4833 | 24591 | AN6205 |
| 841  | CONTIG105 | 243078 | 243592 | 1.89 | 2.05E-02 | transcription_start_site | - | 241591 | 241591 | -1744 | 24598 | AN6207 |
| 841  | CONTIG105 | 243078 | 243592 | 1.89 | 2.05E-02 | transcription_start_site | - | 241394 | 241394 | -1941 | 24599 | AN6207 |
| 841  | CONTIG105 | 243078 | 243592 | 1.89 | 2.05E-02 | transcription_start_site | - | 241102 | 241102 | -2233 | 24600 | AN6207 |
| 841  | CONTIG105 | 243078 | 243592 | 1.89 | 2.05E-02 | transcription_start_site | - | 240158 | 240158 | -3177 | 24601 | AN6207 |
| 885  | CONTIG105 | 242043 | 242920 | 1.85 | 2.29E-02 | transcription_start_site | - | 241591 | 241591 | -890  | 24598 | AN6207 |
| 885  | CONTIG105 | 242043 | 242920 | 1.85 | 2.29E-02 | transcription_start_site | - | 241394 | 241394 | -1087 | 24599 | AN6207 |
| 885  | CONTIG105 | 242043 | 242920 | 1.85 | 2.29E-02 | transcription_start_site | - | 241102 | 241102 | -1379 | 24600 | AN6207 |
| 885  | CONTIG105 | 242043 | 242920 | 1.85 | 2.29E-02 | transcription_start_site | - | 240158 | 240158 | -2323 | 24601 | AN6207 |
| 841  | CONTIG105 | 243078 | 243592 | 1.89 | 2.05E-02 | transcription_start_site | + | 244603 | 244603 | -1268 | 24602 | AN6208 |
| 841  | CONTIG105 | 243078 | 243592 | 1.89 | 2.05E-02 | transcription_start_site | + | 244977 | 244977 | -1642 | 24603 | AN6208 |
| 841  | CONTIG105 | 243078 | 243592 | 1.89 | 2.05E-02 | transcription_start_site | + | 245199 | 245199 | -1864 | 24604 | AN6208 |
| 841  | CONTIG105 | 243078 | 243592 | 1.89 | 2.05E-02 | transcription_start_site | + | 245554 | 245554 | -2219 | 24605 | AN6208 |
| 841  | CONTIG105 | 243078 | 243592 | 1.89 | 2.05E-02 | transcription_start_site | + | 246079 | 246079 | -2744 | 24606 | AN6208 |
| 885  | CONTIG105 | 242043 | 242920 | 1.85 | 2.29E-02 | transcription_start_site | + | 244603 | 244603 | -2121 | 24602 | AN6208 |
| 885  | CONTIG105 | 242043 | 242920 | 1.85 | 2.29E-02 | transcription_start_site | + | 244977 | 244977 | -2495 | 24603 | AN6208 |
| 885  | CONTIG105 | 242043 | 242920 | 1.85 | 2.29E-02 | transcription_start_site | + | 245199 | 245199 | -2717 | 24604 | AN6208 |
| 885  | CONTIG105 | 242043 | 242920 | 1.85 | 2.29E-02 | transcription_start_site | + | 245554 | 245554 | -3072 | 24605 | AN6208 |
| 885  | CONTIG105 | 242043 | 242920 | 1.85 | 2.29E-02 | transcription_start_site | + | 246079 | 246079 | -3597 | 24606 | AN6208 |
| 1496 | CONTIG106 | 5111   | 5390   | 1.28 | 6.04E-02 | transcription_start_site | - | 3414   | 3414   | -1836 | 24634 | AN6220 |
| 1496 | CONTIG106 | 5111   | 5390   | 1.28 | 6.04E-02 | transcription_start_site | - | 2822   | 2822   | -2428 | 24635 | AN6220 |
| 1496 | CONTIG106 | 5111   | 5390   | 1.28 | 6.04E-02 | transcription_start_site | - | 2759   | 2759   | -2491 | 24636 | AN6220 |
| 1496 | CONTIG106 | 5111   | 5390   | 1.28 | 6.04E-02 | transcription_start_site | - | 2606   | 2606   | -2644 | 24637 | AN6220 |
| 1708 | CONTIG106 | 10881  | 11320  | 1.13 | 5.49E-02 | transcription_start_site | - | 7625   | 7625   | -3475 | 24638 | AN6221 |
| 1708 | CONTIG106 | 10881  | 11320  | 1.13 | 5.49E-02 | transcription_start_site | - | 7309   | 7309   | -3791 | 24639 | AN6221 |
| 2077 | CONTIG106 | 21004  | 21359  | 0.9  | 1.97E-01 | transcription_start_site | - | 19167  | 19167  | -2014 | 24640 | AN6223 |
| 2077 | CONTIG106 | 21004  | 21359  | 0.9  | 1.97E-01 | transcription_start_site | - | 19059  | 19059  | -2122 | 24641 | AN6223 |
| 2077 | CONTIG106 | 21004  | 21359  | 0.9  | 1.97E-01 | transcription_start_site | - | 21148  | 21148  | -33   | 24642 | AN6224 |
| 2077 | CONTIG106 | 21004  | 21359  | 0.9  | 1.97E-01 | transcription_start_site | - | 21074  | 21074  | -107  | 24643 | AN6224 |
| 2077 | CONTIG106 | 21004  | 21359  | 0.9  | 1.97E-01 | transcription_start_site | - | 20629  | 20629  | -552  | 24644 | AN6224 |
| 2077 | CONTIG106 | 21004  | 21359  | 0.9  | 1.97E-01 | transcription_start_site | + | 21389  | 21389  | -207  | 24645 | AN6225 |
| 2077 | CONTIG106 | 21004  | 21359  | 0.9  | 1.97E-01 | transcription_start_site | + | 21463  | 21463  | -281  | 24646 | AN6225 |
| 2077 | CONTIG106 | 21004  | 21359  | 0.9  | 1.97E-01 | transcription_start_site | + | 21538  | 21538  | -356  | 24647 | AN6225 |
| 2077 | CONTIG106 | 21004  | 21359  | 0.9  | 1.97E-01 | transcription_start_site | + | 21701  | 21701  | -519  | 24648 | AN6225 |
| 507  | CONTIG106 | 45242  | 45651  | 2.3  | 1.62E-03 | transcription_start_site | + | 47883  | 47883  | -2436 | 24656 | AN6230 |
| 507  | CONTIG106 | 45242  | 45651  | 2.3  | 1.62E-03 | transcription_start_site | + | 47975  | 47975  | -2528 | 24657 | AN6230 |
| 507  | CONTIG106 | 45242  | 45651  | 2.3  | 1.62E-03 | transcription_start_site | + | 49529  | 49529  | -4082 | 24658 | AN6230 |
| 1342 | CONTIG106 | 58508  | 58932  | 1.4  | 2.07E-02 | transcription_start_site | - | 55789  | 55789  | -2931 | 24662 | AN6232 |
| 1342 | CONTIG106 | 58508  | 58932  | 1.4  | 2.07E-02 | transcription_start_site | - | 55599  | 55599  | -3121 | 24663 | AN6232 |
| 1342 | CONTIG106 | 58508  | 58932  | 1.4  | 2.07E-02 | transcription_start_site | - | 55437  | 55437  | -3283 | 24664 | AN6232 |
| 1342 | CONTIG106 | 58508  | 58932  | 1.4  | 2.07E-02 | transcription_start_site | - | 55337  | 55337  | -3383 | 24665 | AN6232 |
| 1342 | CONTIG106 | 58508  | 58932  | 1.4  | 2.07E-02 | transcription_start_site | - | 55227  | 55227  | -3493 | 24666 | AN6232 |
| 1342 | CONTIG106 | 58508  | 58932  | 1.4  | 2.07E-02 | transcription_start_site | - | 55007  | 55007  | -3713 | 24667 | AN6232 |
| 1342 | CONTIG106 | 58508  | 58932  | 1.4  | 2.07E-02 | transcription_start_site | - | 54633  | 54633  | -4087 | 24668 | AN6232 |
| 1342 | CONTIG106 | 58508  | 58932  | 1.4  | 2.07E-02 | transcription_start_site | - | 54307  | 54307  | -4413 | 24669 | AN6232 |
| 1342 | CONTIG106 | 58508  | 58932  | 1.4  | 2.07E-02 | transcription_start_site | - | 54017  | 54017  | -4703 | 24670 | AN6232 |
| 184  | CONTIG106 | 63980  | 64484  | 2.87 | 0.00E+00 | transcription_start_site | - | 60766  | 60766  | -3466 | 24671 | AN6233 |
| 184  | CONTIG106 | 63980  | 64484  | 2.87 | 0.00E+00 | transcription_start_site | - | 60550  | 60550  | -3682 | 24672 | AN6233 |

|      |           |       |       |      |          |                          |   |       |       |       |       |        |
|------|-----------|-------|-------|------|----------|--------------------------|---|-------|-------|-------|-------|--------|
| 572  | CONTIG106 | 64515 | 65089 | 2.22 | 2.32E-03 | transcription_start_site | - | 60766 | 60766 | -4036 | 24671 | AN6233 |
| 572  | CONTIG106 | 64515 | 65089 | 2.22 | 2.32E-03 | transcription_start_site | - | 60550 | 60550 | -4252 | 24672 | AN6233 |
| 572  | CONTIG106 | 64515 | 65089 | 2.22 | 2.32E-03 | transcription_start_site | - | 65722 | 65722 | 920   | 24674 | AN6234 |
| 184  | CONTIG106 | 63980 | 64484 | 2.87 | 0.00E+00 | transcription_start_site | + | 66971 | 66971 | -2739 | 24675 | AN6235 |
| 184  | CONTIG106 | 63980 | 64484 | 2.87 | 0.00E+00 | transcription_start_site | + | 67244 | 67244 | -3012 | 24676 | AN6235 |
| 572  | CONTIG106 | 64515 | 65089 | 2.22 | 2.32E-03 | transcription_start_site | + | 66971 | 66971 | -2169 | 24675 | AN6235 |
| 572  | CONTIG106 | 64515 | 65089 | 2.22 | 2.32E-03 | transcription_start_site | + | 67244 | 67244 | -2442 | 24676 | AN6235 |
| 1679 | CONTIG107 | 11784 | 12058 | 1.15 | 6.74E-02 | transcription_start_site | - | 11793 | 11793 | -128  | 24680 | AN6237 |
| 1679 | CONTIG107 | 11784 | 12058 | 1.15 | 6.74E-02 | transcription_start_site | - | 11412 | 11412 | -509  | 24681 | AN6237 |
| 1679 | CONTIG107 | 11784 | 12058 | 1.15 | 6.74E-02 | transcription_start_site | - | 10430 | 10430 | -1491 | 24682 | AN6237 |
| 2007 | CONTIG107 | 15304 | 15653 | 0.94 | 1.38E-01 | transcription_start_site | - | 11793 | 11793 | -3685 | 24680 | AN6237 |
| 2007 | CONTIG107 | 15304 | 15653 | 0.94 | 1.38E-01 | transcription_start_site | - | 11412 | 11412 | -4066 | 24681 | AN6237 |
| 2007 | CONTIG107 | 15304 | 15653 | 0.94 | 1.38E-01 | transcription_start_site | - | 10430 | 10430 | -5048 | 24682 | AN6237 |
| 1679 | CONTIG107 | 11784 | 12058 | 1.15 | 6.74E-02 | transcription_start_site | + | 12151 | 12151 | -230  | 24683 | AN6238 |
| 1679 | CONTIG107 | 11784 | 12058 | 1.15 | 6.74E-02 | transcription_start_site | + | 12417 | 12417 | -496  | 24684 | AN6238 |
| 1679 | CONTIG107 | 11784 | 12058 | 1.15 | 6.74E-02 | transcription_start_site | + | 12735 | 12735 | -814  | 24685 | AN6238 |
| 1679 | CONTIG107 | 11784 | 12058 | 1.15 | 6.74E-02 | transcription_start_site | + | 13131 | 13131 | -1210 | 24686 | AN6238 |
| 2007 | CONTIG107 | 15304 | 15653 | 0.94 | 1.38E-01 | transcription_start_site | - | 15403 | 15403 | -75   | 24687 | AN6239 |
| 2007 | CONTIG107 | 15304 | 15653 | 0.94 | 1.38E-01 | transcription_start_site | - | 15296 | 15296 | -182  | 24688 | AN6239 |
| 1679 | CONTIG107 | 11784 | 12058 | 1.15 | 6.74E-02 | transcription_start_site | + | 16457 | 16457 | -4536 | 24689 | AN6240 |
| 1679 | CONTIG107 | 11784 | 12058 | 1.15 | 6.74E-02 | transcription_start_site | + | 16761 | 16761 | -4840 | 24690 | AN6240 |
| 2007 | CONTIG107 | 15304 | 15653 | 0.94 | 1.38E-01 | transcription_start_site | + | 16457 | 16457 | -978  | 24689 | AN6240 |
| 2007 | CONTIG107 | 15304 | 15653 | 0.94 | 1.38E-01 | transcription_start_site | + | 16761 | 16761 | -1282 | 24690 | AN6240 |
| 755  | CONTIG107 | 24394 | 24808 | 1.99 | 3.37E-03 | transcription_start_site | - | 19774 | 19774 | -4827 | 24691 | AN6241 |
| 755  | CONTIG107 | 24394 | 24808 | 1.99 | 3.37E-03 | transcription_start_site | - | 21625 | 21625 | -2976 | 24694 | AN6242 |
| 755  | CONTIG107 | 24394 | 24808 | 1.99 | 3.37E-03 | transcription_start_site | - | 21112 | 21112 | -3489 | 24695 | AN6242 |
| 755  | CONTIG107 | 24394 | 24808 | 1.99 | 3.37E-03 | transcription_start_site | - | 20743 | 20743 | -3858 | 24696 | AN6242 |
| 755  | CONTIG107 | 24394 | 24808 | 1.99 | 3.37E-03 | transcription_start_site | - | 20591 | 20591 | -4010 | 24697 | AN6242 |
| 1265 | CONTIG107 | 26104 | 26842 | 1.47 | 2.29E-02 | transcription_start_site | - | 21625 | 21625 | -4848 | 24694 | AN6242 |
| 1265 | CONTIG107 | 26104 | 26842 | 1.47 | 2.29E-02 | transcription_start_site | - | 21112 | 21112 | -5361 | 24695 | AN6242 |
| 1612 | CONTIG107 | 24839 | 26015 | 1.19 | 3.02E-02 | transcription_start_site | - | 21625 | 21625 | -3802 | 24694 | AN6242 |
| 1612 | CONTIG107 | 24839 | 26015 | 1.19 | 3.02E-02 | transcription_start_site | - | 21112 | 21112 | -4315 | 24695 | AN6242 |
| 1612 | CONTIG107 | 24839 | 26015 | 1.19 | 3.02E-02 | transcription_start_site | - | 20743 | 20743 | -4684 | 24696 | AN6242 |
| 1612 | CONTIG107 | 24839 | 26015 | 1.19 | 3.02E-02 | transcription_start_site | - | 20591 | 20591 | -4836 | 24697 | AN6242 |
| 755  | CONTIG107 | 24394 | 24808 | 1.99 | 3.37E-03 | transcription_start_site | + | 28048 | 28048 | -3447 | 24698 | AN6243 |
| 755  | CONTIG107 | 24394 | 24808 | 1.99 | 3.37E-03 | transcription_start_site | + | 28268 | 28268 | -3667 | 24699 | AN6243 |
| 755  | CONTIG107 | 24394 | 24808 | 1.99 | 3.37E-03 | transcription_start_site | + | 29063 | 29063 | -4462 | 24700 | AN6243 |
| 1265 | CONTIG107 | 26104 | 26842 | 1.47 | 2.29E-02 | transcription_start_site | + | 28048 | 28048 | -1575 | 24698 | AN6243 |
| 1265 | CONTIG107 | 26104 | 26842 | 1.47 | 2.29E-02 | transcription_start_site | + | 28268 | 28268 | -1795 | 24699 | AN6243 |
| 1265 | CONTIG107 | 26104 | 26842 | 1.47 | 2.29E-02 | transcription_start_site | + | 29063 | 29063 | -2590 | 24700 | AN6243 |
| 1521 | CONTIG107 | 27990 | 28339 | 1.26 | 4.78E-02 | transcription_start_site | + | 28268 | 28268 | -103  | 24699 | AN6243 |
| 1521 | CONTIG107 | 27990 | 28339 | 1.26 | 4.78E-02 | transcription_start_site | + | 28048 | 28048 | 116   | 24698 | AN6243 |
| 1521 | CONTIG107 | 27990 | 28339 | 1.26 | 4.78E-02 | transcription_start_site | + | 29063 | 29063 | -898  | 24700 | AN6243 |
| 1612 | CONTIG107 | 24839 | 26015 | 1.19 | 3.02E-02 | transcription_start_site | + | 28048 | 28048 | -2621 | 24698 | AN6243 |
| 1612 | CONTIG107 | 24839 | 26015 | 1.19 | 3.02E-02 | transcription_start_site | + | 28268 | 28268 | -2841 | 24699 | AN6243 |
| 1612 | CONTIG107 | 24839 | 26015 | 1.19 | 3.02E-02 | transcription_start_site | + | 29063 | 29063 | -3636 | 24700 | AN6243 |
| 1940 | CONTIG107 | 27239 | 27894 | 0.98 | 7.38E-02 | transcription_start_site | + | 28048 | 28048 | -481  | 24698 | AN6243 |
| 1940 | CONTIG107 | 27239 | 27894 | 0.98 | 7.38E-02 | transcription_start_site | + | 28268 | 28268 | -701  | 24699 | AN6243 |
| 1940 | CONTIG107 | 27239 | 27894 | 0.98 | 7.38E-02 | transcription_start_site | + | 29063 | 29063 | -1496 | 24700 | AN6243 |
| 1265 | CONTIG107 | 26104 | 26842 | 1.47 | 2.29E-02 | transcription_start_site | + | 31567 | 31567 | -5094 | 24701 | AN6244 |
| 1521 | CONTIG107 | 27990 | 28339 | 1.26 | 4.78E-02 | transcription_start_site | + | 31567 | 31567 | -3402 | 24701 | AN6244 |
| 1521 | CONTIG107 | 27990 | 28339 | 1.26 | 4.78E-02 | transcription_start_site | + | 32178 | 32178 | -4013 | 24702 | AN6244 |
| 1940 | CONTIG107 | 27239 | 27894 | 0.98 | 7.38E-02 | transcription_start_site | + | 31567 | 31567 | -4000 | 24701 | AN6244 |
| 1940 | CONTIG107 | 27239 | 27894 | 0.98 | 7.38E-02 | transcription_start_site | + | 32178 | 32178 | -4611 | 24702 | AN6244 |
| 1182 | CONTIG107 | 34355 | 34784 | 1.54 | 1.80E-02 | transcription_start_site | - | 34039 | 34039 | -530  | 24703 | AN6245 |
| 1182 | CONTIG107 | 34355 | 34784 | 1.54 | 1.80E-02 | transcription_start_site | - | 33592 | 33592 | -977  | 24704 | AN6245 |
| 1998 | CONTIG107 | 34965 | 36360 | 0.94 | 4.39E-02 | transcription_start_site | - | 34039 | 34039 | -1623 | 24703 | AN6245 |

|                |       |       |      |          |                          |   |       |       |       |       |        |
|----------------|-------|-------|------|----------|--------------------------|---|-------|-------|-------|-------|--------|
| 1998 CONTIG107 | 34965 | 36360 | 0.94 | 4.39E-02 | transcription_start_site | - | 33592 | 33592 | -2070 | 24704 | AN6245 |
| 1182 CONTIG107 | 34355 | 34784 | 1.54 | 1.80E-02 | transcription_start_site | + | 35262 | 35262 | -692  | 24705 | AN6246 |
| 1182 CONTIG107 | 34355 | 34784 | 1.54 | 1.80E-02 | transcription_start_site | + | 35538 | 35538 | -968  | 24706 | AN6246 |
| 1182 CONTIG107 | 34355 | 34784 | 1.54 | 1.80E-02 | transcription_start_site | + | 35686 | 35686 | -1116 | 24707 | AN6246 |
| 1998 CONTIG107 | 34965 | 36360 | 0.94 | 4.39E-02 | transcription_start_site | + | 35686 | 35686 | -23   | 24707 | AN6246 |
| 1998 CONTIG107 | 34965 | 36360 | 0.94 | 4.39E-02 | transcription_start_site | + | 35538 | 35538 | 124   | 24706 | AN6246 |
| 1998 CONTIG107 | 34965 | 36360 | 0.94 | 4.39E-02 | transcription_start_site | + | 35262 | 35262 | 400   | 24705 | AN6246 |
| 1182 CONTIG107 | 34355 | 34784 | 1.54 | 1.80E-02 | transcription_start_site | + | 37178 | 37178 | -2608 | 24708 | AN6247 |
| 1182 CONTIG107 | 34355 | 34784 | 1.54 | 1.80E-02 | transcription_start_site | + | 37799 | 37799 | -3229 | 24709 | AN6247 |
| 1998 CONTIG107 | 34965 | 36360 | 0.94 | 4.39E-02 | transcription_start_site | + | 37178 | 37178 | -1515 | 24708 | AN6247 |
| 1998 CONTIG107 | 34965 | 36360 | 0.94 | 4.39E-02 | transcription_start_site | + | 37799 | 37799 | -2136 | 24709 | AN6247 |
| 1998 CONTIG107 | 34965 | 36360 | 0.94 | 4.39E-02 | transcription_start_site | + | 41329 | 41329 | -5666 | 24710 | AN6248 |
| 834 CONTIG107  | 43970 | 44529 | 1.89 | 5.08E-03 | transcription_start_site | + | 44790 | 44790 | -540  | 24713 | AN6249 |
| 1183 CONTIG107 | 48980 | 49406 | 1.54 | 1.80E-02 | transcription_start_site | - | 48246 | 48246 | -947  | 24714 | AN6250 |
| 1183 CONTIG107 | 48980 | 49406 | 1.54 | 1.80E-02 | transcription_start_site | - | 47853 | 47853 | -1340 | 24715 | AN6250 |
| 1183 CONTIG107 | 48980 | 49406 | 1.54 | 1.80E-02 | transcription_start_site | - | 47746 | 47746 | -1447 | 24716 | AN6250 |
| 1183 CONTIG107 | 48980 | 49406 | 1.54 | 1.80E-02 | transcription_start_site | - | 47621 | 47621 | -1572 | 24717 | AN6250 |
| 1183 CONTIG107 | 48980 | 49406 | 1.54 | 1.80E-02 | transcription_start_site | - | 47506 | 47506 | -1687 | 24718 | AN6250 |
| 1183 CONTIG107 | 48980 | 49406 | 1.54 | 1.80E-02 | transcription_start_site | - | 47328 | 47328 | -1865 | 24719 | AN6250 |
| 1183 CONTIG107 | 48980 | 49406 | 1.54 | 1.80E-02 | transcription_start_site | - | 47118 | 47118 | -2075 | 24720 | AN6250 |
| 1183 CONTIG107 | 48980 | 49406 | 1.54 | 1.80E-02 | transcription_start_site | - | 46838 | 46838 | -2355 | 24721 | AN6250 |
| 1183 CONTIG107 | 48980 | 49406 | 1.54 | 1.80E-02 | transcription_start_site | - | 46680 | 46680 | -2513 | 24722 | AN6250 |
| 1183 CONTIG107 | 48980 | 49406 | 1.54 | 1.80E-02 | transcription_start_site | - | 46532 | 46532 | -2661 | 24723 | AN6250 |
| 1183 CONTIG107 | 48980 | 49406 | 1.54 | 1.80E-02 | transcription_start_site | - | 46179 | 46179 | -3014 | 24724 | AN6250 |
| 1346 CONTIG107 | 50120 | 50919 | 1.4  | 3.01E-02 | transcription_start_site | - | 48246 | 48246 | -2273 | 24714 | AN6250 |
| 1346 CONTIG107 | 50120 | 50919 | 1.4  | 3.01E-02 | transcription_start_site | - | 47853 | 47853 | -2666 | 24715 | AN6250 |
| 1346 CONTIG107 | 50120 | 50919 | 1.4  | 3.01E-02 | transcription_start_site | - | 47746 | 47746 | -2773 | 24716 | AN6250 |
| 1346 CONTIG107 | 50120 | 50919 | 1.4  | 3.01E-02 | transcription_start_site | - | 47621 | 47621 | -2898 | 24717 | AN6250 |
| 1346 CONTIG107 | 50120 | 50919 | 1.4  | 3.01E-02 | transcription_start_site | - | 47506 | 47506 | -3013 | 24718 | AN6250 |
| 1346 CONTIG107 | 50120 | 50919 | 1.4  | 3.01E-02 | transcription_start_site | - | 47328 | 47328 | -3191 | 24719 | AN6250 |
| 1346 CONTIG107 | 50120 | 50919 | 1.4  | 3.01E-02 | transcription_start_site | - | 47118 | 47118 | -3401 | 24720 | AN6250 |
| 1346 CONTIG107 | 50120 | 50919 | 1.4  | 3.01E-02 | transcription_start_site | - | 46838 | 46838 | -3681 | 24721 | AN6250 |
| 1346 CONTIG107 | 50120 | 50919 | 1.4  | 3.01E-02 | transcription_start_site | - | 46680 | 46680 | -3839 | 24722 | AN6250 |
| 1346 CONTIG107 | 50120 | 50919 | 1.4  | 3.01E-02 | transcription_start_site | - | 46532 | 46532 | -3987 | 24723 | AN6250 |
| 1346 CONTIG107 | 50120 | 50919 | 1.4  | 3.01E-02 | transcription_start_site | - | 46179 | 46179 | -4340 | 24724 | AN6250 |
| 1183 CONTIG107 | 48980 | 49406 | 1.54 | 1.80E-02 | transcription_start_site | + | 51305 | 51305 | -2112 | 24725 | AN6251 |
| 1183 CONTIG107 | 48980 | 49406 | 1.54 | 1.80E-02 | transcription_start_site | + | 51464 | 51464 | -2271 | 24726 | AN6251 |
| 1346 CONTIG107 | 50120 | 50919 | 1.4  | 3.01E-02 | transcription_start_site | + | 51305 | 51305 | -785  | 24725 | AN6251 |
| 1346 CONTIG107 | 50120 | 50919 | 1.4  | 3.01E-02 | transcription_start_site | + | 51464 | 51464 | -944  | 24726 | AN6251 |
| 1183 CONTIG107 | 48980 | 49406 | 1.54 | 1.80E-02 | transcription_start_site | + | 52885 | 52885 | -3692 | 24727 | AN6252 |
| 1183 CONTIG107 | 48980 | 49406 | 1.54 | 1.80E-02 | transcription_start_site | + | 53042 | 53042 | -3849 | 24728 | AN6252 |
| 1183 CONTIG107 | 48980 | 49406 | 1.54 | 1.80E-02 | transcription_start_site | + | 53695 | 53695 | -4502 | 24729 | AN6252 |
| 1346 CONTIG107 | 50120 | 50919 | 1.4  | 3.01E-02 | transcription_start_site | + | 52885 | 52885 | -2365 | 24727 | AN6252 |
| 1346 CONTIG107 | 50120 | 50919 | 1.4  | 3.01E-02 | transcription_start_site | + | 53042 | 53042 | -2522 | 24728 | AN6252 |
| 1346 CONTIG107 | 50120 | 50919 | 1.4  | 3.01E-02 | transcription_start_site | + | 53695 | 53695 | -3175 | 24729 | AN6252 |
| 1346 CONTIG107 | 50120 | 50919 | 1.4  | 3.01E-02 | transcription_start_site | + | 54624 | 54624 | -4104 | 24730 | AN6253 |
| 2139 CONTIG107 | 56345 | 57654 | 0.84 | 3.16E-02 | transcription_start_site | + | 57076 | 57076 | -76   | 24734 | AN6254 |
| 2139 CONTIG107 | 56345 | 57654 | 0.84 | 3.16E-02 | transcription_start_site | + | 56908 | 56908 | 91    | 24733 | AN6254 |
| 2139 CONTIG107 | 56345 | 57654 | 0.84 | 3.16E-02 | transcription_start_site | + | 56841 | 56841 | 158   | 24732 | AN6254 |
| 2139 CONTIG107 | 56345 | 57654 | 0.84 | 3.16E-02 | transcription_start_site | + | 56624 | 56624 | 375   | 24731 | AN6254 |
| 1838 CONTIG107 | 59343 | 59682 | 1.05 | 9.60E-02 | transcription_start_site | - | 59303 | 59303 | -209  | 24735 | AN6255 |
| 1838 CONTIG107 | 59343 | 59682 | 1.05 | 9.60E-02 | transcription_start_site | - | 59086 | 59086 | -426  | 24736 | AN6255 |
| 1838 CONTIG107 | 59343 | 59682 | 1.05 | 9.60E-02 | transcription_start_site | - | 59003 | 59003 | -509  | 24737 | AN6255 |
| 1838 CONTIG107 | 59343 | 59682 | 1.05 | 9.60E-02 | transcription_start_site | - | 58864 | 58864 | -648  | 24738 | AN6255 |
| 1838 CONTIG107 | 59343 | 59682 | 1.05 | 9.60E-02 | transcription_start_site | - | 58743 | 58743 | -769  | 24739 | AN6255 |
| 1838 CONTIG107 | 59343 | 59682 | 1.05 | 9.60E-02 | transcription_start_site | - | 60635 | 60635 | 1122  | 24741 | AN6256 |
| 1838 CONTIG107 | 59343 | 59682 | 1.05 | 9.60E-02 | transcription_start_site | + | 61403 | 61403 | -1890 | 24742 | AN6257 |

|      |           |        |        |      |          |                          |   |        |        |       |       |        |
|------|-----------|--------|--------|------|----------|--------------------------|---|--------|--------|-------|-------|--------|
| 1838 | CONTIG107 | 59343  | 59682  | 1.05 | 9.60E-02 | transcription_start_site | + | 61673  | 61673  | -2160 | 24743 | AN6257 |
| 1838 | CONTIG107 | 59343  | 59682  | 1.05 | 9.60E-02 | transcription_start_site | + | 61840  | 61840  | -2327 | 24744 | AN6257 |
| 1838 | CONTIG107 | 59343  | 59682  | 1.05 | 9.60E-02 | transcription_start_site | + | 62000  | 62000  | -2487 | 24745 | AN6257 |
| 1838 | CONTIG107 | 59343  | 59682  | 1.05 | 9.60E-02 | transcription_start_site | + | 62287  | 62287  | -2774 | 24746 | AN6257 |
| 1838 | CONTIG107 | 59343  | 59682  | 1.05 | 9.60E-02 | transcription_start_site | + | 62425  | 62425  | -2912 | 24747 | AN6257 |
| 2139 | CONTIG107 | 56345  | 57654  | 0.84 | 3.16E-02 | transcription_start_site | + | 61403  | 61403  | -4403 | 24742 | AN6257 |
| 2139 | CONTIG107 | 56345  | 57654  | 0.84 | 3.16E-02 | transcription_start_site | + | 61673  | 61673  | -4673 | 24743 | AN6257 |
| 2139 | CONTIG107 | 56345  | 57654  | 0.84 | 3.16E-02 | transcription_start_site | + | 61840  | 61840  | -4840 | 24744 | AN6257 |
| 2139 | CONTIG107 | 56345  | 57654  | 0.84 | 3.16E-02 | transcription_start_site | + | 62000  | 62000  | -5000 | 24745 | AN6257 |
| 2139 | CONTIG107 | 56345  | 57654  | 0.84 | 3.16E-02 | transcription_start_site | + | 62287  | 62287  | -5287 | 24746 | AN6257 |
| 2139 | CONTIG107 | 56345  | 57654  | 0.84 | 3.16E-02 | transcription_start_site | + | 62425  | 62425  | -5425 | 24747 | AN6257 |
| 904  | CONTIG107 | 108751 | 109030 | 1.82 | 7.08E-03 | transcription_start_site | - | 108257 | 108257 | -633  | 24780 | AN6271 |
| 904  | CONTIG107 | 108751 | 109030 | 1.82 | 7.08E-03 | transcription_start_site | - | 108038 | 108038 | -852  | 24781 | AN6271 |
| 904  | CONTIG107 | 108751 | 109030 | 1.82 | 7.08E-03 | transcription_start_site | - | 107797 | 107797 | -1093 | 24782 | AN6271 |
| 904  | CONTIG107 | 108751 | 109030 | 1.82 | 7.08E-03 | transcription_start_site | + | 109125 | 109125 | -234  | 24783 | AN6272 |
| 904  | CONTIG107 | 108751 | 109030 | 1.82 | 7.08E-03 | transcription_start_site | + | 109250 | 109250 | -359  | 24784 | AN6272 |
| 904  | CONTIG107 | 108751 | 109030 | 1.82 | 7.08E-03 | transcription_start_site | + | 109730 | 109730 | -839  | 24785 | AN6272 |
| 904  | CONTIG107 | 108751 | 109030 | 1.82 | 7.08E-03 | transcription_start_site | + | 112351 | 112351 | -3460 | 24786 | AN6273 |
| 1472 | CONTIG107 | 119106 | 119605 | 1.29 | 2.07E-02 | transcription_start_site | - | 114438 | 114438 | -4917 | 24787 | AN6274 |
| 2056 | CONTIG107 | 114616 | 114955 | 0.91 | 1.54E-01 | transcription_start_site | - | 114438 | 114438 | -347  | 24787 | AN6274 |
| 2056 | CONTIG107 | 114616 | 114955 | 0.91 | 1.54E-01 | transcription_start_site | - | 113388 | 113388 | -1397 | 24788 | AN6274 |
| 2056 | CONTIG107 | 114616 | 114955 | 0.91 | 1.54E-01 | transcription_start_site | - | 113276 | 113276 | -1509 | 24789 | AN6274 |
| 1472 | CONTIG107 | 119106 | 119605 | 1.29 | 2.07E-02 | transcription_start_site | - | 118085 | 118085 | -1270 | 24790 | AN6275 |
| 318  | CONTIG107 | 124886 | 125248 | 2.59 | 0.00E+00 | transcription_start_site | - | 120099 | 120099 | -4968 | 24791 | AN6276 |
| 377  | CONTIG107 | 124061 | 124405 | 2.48 | 0.00E+00 | transcription_start_site | - | 120099 | 120099 | -4134 | 24791 | AN6276 |
| 377  | CONTIG107 | 124061 | 124405 | 2.48 | 0.00E+00 | transcription_start_site | - | 119880 | 119880 | -4353 | 24792 | AN6276 |
| 377  | CONTIG107 | 124061 | 124405 | 2.48 | 0.00E+00 | transcription_start_site | - | 119752 | 119752 | -4481 | 24793 | AN6276 |
| 1472 | CONTIG107 | 119106 | 119605 | 1.29 | 2.07E-02 | transcription_start_site | - | 119752 | 119752 | 396   | 24793 | AN6276 |
| 1472 | CONTIG107 | 119106 | 119605 | 1.29 | 2.07E-02 | transcription_start_site | - | 119880 | 119880 | 524   | 24792 | AN6276 |
| 1472 | CONTIG107 | 119106 | 119605 | 1.29 | 2.07E-02 | transcription_start_site | - | 120099 | 120099 | 743   | 24791 | AN6276 |
| 318  | CONTIG107 | 124886 | 125248 | 2.59 | 0.00E+00 | transcription_start_site | - | 122901 | 122901 | -2166 | 24794 | AN6277 |
| 318  | CONTIG107 | 124886 | 125248 | 2.59 | 0.00E+00 | transcription_start_site | - | 121374 | 121374 | -3693 | 24795 | AN6277 |
| 318  | CONTIG107 | 124886 | 125248 | 2.59 | 0.00E+00 | transcription_start_site | - | 121265 | 121265 | -3802 | 24796 | AN6277 |
| 377  | CONTIG107 | 124061 | 124405 | 2.48 | 0.00E+00 | transcription_start_site | - | 122901 | 122901 | -1332 | 24794 | AN6277 |
| 377  | CONTIG107 | 124061 | 124405 | 2.48 | 0.00E+00 | transcription_start_site | - | 121374 | 121374 | -2859 | 24795 | AN6277 |
| 377  | CONTIG107 | 124061 | 124405 | 2.48 | 0.00E+00 | transcription_start_site | - | 121265 | 121265 | -2968 | 24796 | AN6277 |
| 318  | CONTIG107 | 124886 | 125248 | 2.59 | 0.00E+00 | transcription_start_site | + | 125294 | 125294 | -227  | 24797 | AN6278 |
| 318  | CONTIG107 | 124886 | 125248 | 2.59 | 0.00E+00 | transcription_start_site | + | 126250 | 126250 | -1183 | 24798 | AN6278 |
| 318  | CONTIG107 | 124886 | 125248 | 2.59 | 0.00E+00 | transcription_start_site | + | 126762 | 126762 | -1695 | 24799 | AN6278 |
| 318  | CONTIG107 | 124886 | 125248 | 2.59 | 0.00E+00 | transcription_start_site | + | 127027 | 127027 | -1960 | 24800 | AN6278 |
| 377  | CONTIG107 | 124061 | 124405 | 2.48 | 0.00E+00 | transcription_start_site | + | 125294 | 125294 | -1061 | 24797 | AN6278 |
| 377  | CONTIG107 | 124061 | 124405 | 2.48 | 0.00E+00 | transcription_start_site | + | 126250 | 126250 | -2017 | 24798 | AN6278 |
| 377  | CONTIG107 | 124061 | 124405 | 2.48 | 0.00E+00 | transcription_start_site | + | 126762 | 126762 | -2529 | 24799 | AN6278 |
| 377  | CONTIG107 | 124061 | 124405 | 2.48 | 0.00E+00 | transcription_start_site | + | 127027 | 127027 | -2794 | 24800 | AN6278 |
| 502  | CONTIG107 | 129921 | 131080 | 2.31 | 3.81E-04 | transcription_start_site | - | 129687 | 129687 | -813  | 24801 | AN6279 |
| 502  | CONTIG107 | 129921 | 131080 | 2.31 | 3.81E-04 | transcription_start_site | - | 129534 | 129534 | -966  | 24802 | AN6279 |
| 502  | CONTIG107 | 129921 | 131080 | 2.31 | 3.81E-04 | transcription_start_site | - | 129402 | 129402 | -1098 | 24803 | AN6279 |
| 502  | CONTIG107 | 129921 | 131080 | 2.31 | 3.81E-04 | transcription_start_site | - | 127689 | 127689 | -2811 | 24804 | AN6279 |
| 1225 | CONTIG107 | 133876 | 134470 | 1.5  | 8.99E-03 | transcription_start_site | - | 129687 | 129687 | -4486 | 24801 | AN6279 |
| 1225 | CONTIG107 | 133876 | 134470 | 1.5  | 8.99E-03 | transcription_start_site | - | 129534 | 129534 | -4639 | 24802 | AN6279 |
| 1225 | CONTIG107 | 133876 | 134470 | 1.5  | 8.99E-03 | transcription_start_site | - | 129402 | 129402 | -4771 | 24803 | AN6279 |
| 502  | CONTIG107 | 129921 | 131080 | 2.31 | 3.81E-04 | transcription_start_site | - | 131732 | 131732 | 1231  | 24807 | AN6280 |
| 1225 | CONTIG107 | 133876 | 134470 | 1.5  | 8.99E-03 | transcription_start_site | - | 133737 | 133737 | -436  | 24805 | AN6280 |
| 1225 | CONTIG107 | 133876 | 134470 | 1.5  | 8.99E-03 | transcription_start_site | - | 133473 | 133473 | -700  | 24806 | AN6280 |
| 1225 | CONTIG107 | 133876 | 134470 | 1.5  | 8.99E-03 | transcription_start_site | - | 131732 | 131732 | -2441 | 24807 | AN6280 |
| 1839 | CONTIG107 | 150543 | 150967 | 1.05 | 9.60E-02 | transcription_start_site | - | 147763 | 147763 | -2992 | 24812 | AN6284 |
| 2057 | CONTIG107 | 148067 | 148636 | 0.91 | 1.54E-01 | transcription_start_site | - | 147763 | 147763 | -588  | 24812 | AN6284 |



|      |           |        |        |      |          |                          |   |        |        |       |       |        |
|------|-----------|--------|--------|------|----------|--------------------------|---|--------|--------|-------|-------|--------|
| 1839 | CONTIG107 | 150543 | 150967 | 1.05 | 9.60E-02 | transcription_start_site | + | 150030 | 150030 | 725   | 24816 | AN6285 |
| 1839 | CONTIG107 | 150543 | 150967 | 1.05 | 9.60E-02 | transcription_start_site | + | 149814 | 149814 | 941   | 24815 | AN6285 |
| 1839 | CONTIG107 | 150543 | 150967 | 1.05 | 9.60E-02 | transcription_start_site | + | 149632 | 149632 | 1123  | 24814 | AN6285 |
| 2057 | CONTIG107 | 148067 | 148636 | 0.91 | 1.54E-01 | transcription_start_site | + | 149529 | 149529 | -1177 | 24813 | AN6285 |
| 2057 | CONTIG107 | 148067 | 148636 | 0.91 | 1.54E-01 | transcription_start_site | + | 149632 | 149632 | -1280 | 24814 | AN6285 |
| 2057 | CONTIG107 | 148067 | 148636 | 0.91 | 1.54E-01 | transcription_start_site | + | 149814 | 149814 | -1462 | 24815 | AN6285 |
| 2057 | CONTIG107 | 148067 | 148636 | 0.91 | 1.54E-01 | transcription_start_site | + | 150030 | 150030 | -1678 | 24816 | AN6285 |
| 1839 | CONTIG107 | 150543 | 150967 | 1.05 | 9.60E-02 | transcription_start_site | + | 151015 | 151015 | -260  | 24817 | AN6286 |
| 1839 | CONTIG107 | 150543 | 150967 | 1.05 | 9.60E-02 | transcription_start_site | + | 151243 | 151243 | -488  | 24818 | AN6286 |
| 1839 | CONTIG107 | 150543 | 150967 | 1.05 | 9.60E-02 | transcription_start_site | + | 151357 | 151357 | -602  | 24819 | AN6286 |
| 1839 | CONTIG107 | 150543 | 150967 | 1.05 | 9.60E-02 | transcription_start_site | + | 151427 | 151427 | -672  | 24820 | AN6286 |
| 1839 | CONTIG107 | 150543 | 150967 | 1.05 | 9.60E-02 | transcription_start_site | + | 151614 | 151614 | -859  | 24821 | AN6286 |
| 1839 | CONTIG107 | 150543 | 150967 | 1.05 | 9.60E-02 | transcription_start_site | + | 151766 | 151766 | -1011 | 24822 | AN6286 |
| 1839 | CONTIG107 | 150543 | 150967 | 1.05 | 9.60E-02 | transcription_start_site | + | 153316 | 153316 | -2561 | 24823 | AN6286 |
| 1839 | CONTIG107 | 150543 | 150967 | 1.05 | 9.60E-02 | transcription_start_site | + | 153407 | 153407 | -2652 | 24824 | AN6286 |
| 1839 | CONTIG107 | 150543 | 150967 | 1.05 | 9.60E-02 | transcription_start_site | + | 154264 | 154264 | -3509 | 24825 | AN6286 |
| 2057 | CONTIG107 | 148067 | 148636 | 0.91 | 1.54E-01 | transcription_start_site | + | 151015 | 151015 | -2663 | 24817 | AN6286 |
| 2057 | CONTIG107 | 148067 | 148636 | 0.91 | 1.54E-01 | transcription_start_site | + | 151243 | 151243 | -2891 | 24818 | AN6286 |
| 2057 | CONTIG107 | 148067 | 148636 | 0.91 | 1.54E-01 | transcription_start_site | + | 151357 | 151357 | -3005 | 24819 | AN6286 |
| 2057 | CONTIG107 | 148067 | 148636 | 0.91 | 1.54E-01 | transcription_start_site | + | 151427 | 151427 | -3075 | 24820 | AN6286 |
| 2057 | CONTIG107 | 148067 | 148636 | 0.91 | 1.54E-01 | transcription_start_site | + | 151614 | 151614 | -3262 | 24821 | AN6286 |
| 2057 | CONTIG107 | 148067 | 148636 | 0.91 | 1.54E-01 | transcription_start_site | + | 151766 | 151766 | -3414 | 24822 | AN6286 |
| 2057 | CONTIG107 | 148067 | 148636 | 0.91 | 1.54E-01 | transcription_start_site | + | 153316 | 153316 | -4964 | 24823 | AN6286 |
| 2057 | CONTIG107 | 148067 | 148636 | 0.91 | 1.54E-01 | transcription_start_site | + | 153407 | 153407 | -5055 | 24824 | AN6286 |
| 1478 | CONTIG107 | 177382 | 177656 | 1.29 | 4.20E-02 | transcription_start_site | - | 172777 | 172777 | -4742 | 24847 | AN6293 |
| 1478 | CONTIG107 | 177382 | 177656 | 1.29 | 4.20E-02 | transcription_start_site | - | 172451 | 172451 | -5068 | 24848 | AN6293 |
| 1478 | CONTIG107 | 177382 | 177656 | 1.29 | 4.20E-02 | transcription_start_site | - | 174706 | 174706 | -2813 | 24856 | AN6294 |
| 1478 | CONTIG107 | 177382 | 177656 | 1.29 | 4.20E-02 | transcription_start_site | - | 174382 | 174382 | -3137 | 24857 | AN6294 |
| 1478 | CONTIG107 | 177382 | 177656 | 1.29 | 4.20E-02 | transcription_start_site | - | 174243 | 174243 | -3276 | 24858 | AN6294 |
| 1478 | CONTIG107 | 177382 | 177656 | 1.29 | 4.20E-02 | transcription_start_site | - | 174027 | 174027 | -3492 | 24859 | AN6294 |
| 1478 | CONTIG107 | 177382 | 177656 | 1.29 | 4.20E-02 | transcription_start_site | - | 173866 | 173866 | -3653 | 24860 | AN6294 |
| 1478 | CONTIG107 | 177382 | 177656 | 1.29 | 4.20E-02 | transcription_start_site | - | 176712 | 176712 | -807  | 24861 | AN6295 |
| 1478 | CONTIG107 | 177382 | 177656 | 1.29 | 4.20E-02 | transcription_start_site | - | 176548 | 176548 | -971  | 24862 | AN6295 |
| 1478 | CONTIG107 | 177382 | 177656 | 1.29 | 4.20E-02 | transcription_start_site | + | 178041 | 178041 | -522  | 24863 | AN6296 |
| 1478 | CONTIG107 | 177382 | 177656 | 1.29 | 4.20E-02 | transcription_start_site | + | 178208 | 178208 | -689  | 24864 | AN6296 |
| 1478 | CONTIG107 | 177382 | 177656 | 1.29 | 4.20E-02 | transcription_start_site | + | 178457 | 178457 | -938  | 24865 | AN6296 |
| 1478 | CONTIG107 | 177382 | 177656 | 1.29 | 4.20E-02 | transcription_start_site | + | 179437 | 179437 | -1918 | 24866 | AN6296 |
| 1478 | CONTIG107 | 177382 | 177656 | 1.29 | 4.20E-02 | transcription_start_site | + | 179793 | 179793 | -2274 | 24867 | AN6296 |
| 1478 | CONTIG107 | 177382 | 177656 | 1.29 | 4.20E-02 | transcription_start_site | + | 180211 | 180211 | -2692 | 24868 | AN6297 |
| 1478 | CONTIG107 | 177382 | 177656 | 1.29 | 4.20E-02 | transcription_start_site | + | 180448 | 180448 | -2929 | 24869 | AN6297 |
| 1478 | CONTIG107 | 177382 | 177656 | 1.29 | 4.20E-02 | transcription_start_site | + | 180597 | 180597 | -3078 | 24870 | AN6297 |
| 1478 | CONTIG107 | 177382 | 177656 | 1.29 | 4.20E-02 | transcription_start_site | + | 181096 | 181096 | -3577 | 24871 | AN6297 |
| 2229 | CONTIG107 | 181895 | 182239 | 0.77 | 1.81E-01 | transcription_start_site | + | 181096 | 181096 | 971   | 24871 | AN6297 |
| 1478 | CONTIG107 | 177382 | 177656 | 1.29 | 4.20E-02 | transcription_start_site | + | 182124 | 182124 | -4605 | 24872 | AN6298 |
| 1478 | CONTIG107 | 177382 | 177656 | 1.29 | 4.20E-02 | transcription_start_site | + | 182558 | 182558 | -5039 | 24873 | AN6298 |
| 2229 | CONTIG107 | 181895 | 182239 | 0.77 | 1.81E-01 | transcription_start_site | + | 182124 | 182124 | -57   | 24872 | AN6298 |
| 2229 | CONTIG107 | 181895 | 182239 | 0.77 | 1.81E-01 | transcription_start_site | + | 182558 | 182558 | -491  | 24873 | AN6298 |
| 2229 | CONTIG107 | 181895 | 182239 | 0.77 | 1.81E-01 | transcription_start_site | + | 186784 | 186784 | -4717 | 24876 | AN6300 |
| 2229 | CONTIG107 | 181895 | 182239 | 0.77 | 1.81E-01 | transcription_start_site | + | 186925 | 186925 | -4858 | 24877 | AN6300 |
| 503  | CONTIG107 | 197780 | 198294 | 2.31 | 3.81E-04 | transcription_start_site | + | 198695 | 198695 | -658  | 24894 | AN6305 |
| 503  | CONTIG107 | 197780 | 198294 | 2.31 | 3.81E-04 | transcription_start_site | + | 199515 | 199515 | -1478 | 24895 | AN6305 |
| 503  | CONTIG107 | 197780 | 198294 | 2.31 | 3.81E-04 | transcription_start_site | + | 199821 | 199821 | -1784 | 24896 | AN6305 |
| 503  | CONTIG107 | 197780 | 198294 | 2.31 | 3.81E-04 | transcription_start_site | + | 200247 | 200247 | -2210 | 24897 | AN6305 |
| 503  | CONTIG107 | 197780 | 198294 | 2.31 | 3.81E-04 | transcription_start_site | + | 202158 | 202158 | -4121 | 24900 | AN6307 |
| 503  | CONTIG107 | 197780 | 198294 | 2.31 | 3.81E-04 | transcription_start_site | + | 202313 | 202313 | -4276 | 24901 | AN6307 |
| 503  | CONTIG107 | 197780 | 198294 | 2.31 | 3.81E-04 | transcription_start_site | + | 202400 | 202400 | -4363 | 24902 | AN6307 |
| 503  | CONTIG107 | 197780 | 198294 | 2.31 | 3.81E-04 | transcription_start_site | + | 202551 | 202551 | -4514 | 24903 | AN6307 |

|      |           |        |        |      |          |                          |   |        |        |       |       |        |
|------|-----------|--------|--------|------|----------|--------------------------|---|--------|--------|-------|-------|--------|
| 503  | CONTIG107 | 197780 | 198294 | 2.31 | 3.81E-04 | transcription_start_site | + | 202686 | 202686 | -4649 | 24904 | AN6307 |
| 503  | CONTIG107 | 197780 | 198294 | 2.31 | 3.81E-04 | transcription_start_site | + | 203003 | 203003 | -4966 | 24905 | AN6307 |
| 302  | CONTIG107 | 245037 | 245541 | 2.62 | 0.00E+00 | transcription_start_site | - | 243562 | 243562 | -1727 | 24927 | AN6317 |
| 302  | CONTIG107 | 245037 | 245541 | 2.62 | 0.00E+00 | transcription_start_site | - | 243228 | 243228 | -2061 | 24928 | AN6317 |
| 690  | CONTIG107 | 244359 | 244868 | 2.06 | 2.32E-03 | transcription_start_site | - | 243562 | 243562 | -1051 | 24927 | AN6317 |
| 690  | CONTIG107 | 244359 | 244868 | 2.06 | 2.32E-03 | transcription_start_site | - | 243228 | 243228 | -1385 | 24928 | AN6317 |
| 690  | CONTIG107 | 244359 | 244868 | 2.06 | 2.32E-03 | transcription_start_site | - | 239627 | 239627 | -4986 | 24929 | AN6317 |
| 302  | CONTIG107 | 245037 | 245541 | 2.62 | 0.00E+00 | transcription_start_site | + | 246085 | 246085 | -796  | 24931 | AN6318 |
| 302  | CONTIG107 | 245037 | 245541 | 2.62 | 0.00E+00 | transcription_start_site | + | 246254 | 246254 | -965  | 24932 | AN6318 |
| 302  | CONTIG107 | 245037 | 245541 | 2.62 | 0.00E+00 | transcription_start_site | + | 246498 | 246498 | -1209 | 24933 | AN6318 |
| 690  | CONTIG107 | 244359 | 244868 | 2.06 | 2.32E-03 | transcription_start_site | + | 246085 | 246085 | -1471 | 24931 | AN6318 |
| 690  | CONTIG107 | 244359 | 244868 | 2.06 | 2.32E-03 | transcription_start_site | + | 246254 | 246254 | -1640 | 24932 | AN6318 |
| 690  | CONTIG107 | 244359 | 244868 | 2.06 | 2.32E-03 | transcription_start_site | + | 246498 | 246498 | -1884 | 24933 | AN6318 |
| 1146 | CONTIG107 | 276242 | 277037 | 1.57 | 1.85E-03 | transcription_start_site | - | 273011 | 273011 | -3628 | 24969 | AN6325 |
| 1146 | CONTIG107 | 276242 | 277037 | 1.57 | 1.85E-03 | transcription_start_site | - | 272759 | 272759 | -3880 | 24970 | AN6325 |
| 1146 | CONTIG107 | 276242 | 277037 | 1.57 | 1.85E-03 | transcription_start_site | - | 272237 | 272237 | -4402 | 24971 | AN6325 |
| 1389 | CONTIG107 | 297843 | 298252 | 1.36 | 3.34E-02 | transcription_start_site | + | 298778 | 298778 | -730  | 24981 | AN6330 |
| 1389 | CONTIG107 | 297843 | 298252 | 1.36 | 3.34E-02 | transcription_start_site | + | 298865 | 298865 | -817  | 24982 | AN6330 |
| 1389 | CONTIG107 | 297843 | 298252 | 1.36 | 3.34E-02 | transcription_start_site | + | 298972 | 298972 | -924  | 24983 | AN6330 |
| 1389 | CONTIG107 | 297843 | 298252 | 1.36 | 3.34E-02 | transcription_start_site | + | 299085 | 299085 | -1037 | 24984 | AN6330 |
| 1389 | CONTIG107 | 297843 | 298252 | 1.36 | 3.34E-02 | transcription_start_site | + | 301575 | 301575 | -3527 | 24985 | AN6330 |
| 1389 | CONTIG107 | 297843 | 298252 | 1.36 | 3.34E-02 | transcription_start_site | + | 302306 | 302306 | -4258 | 24986 | AN6331 |
| 1389 | CONTIG107 | 297843 | 298252 | 1.36 | 3.34E-02 | transcription_start_site | + | 302435 | 302435 | -4387 | 24987 | AN6331 |
| 1389 | CONTIG107 | 297843 | 298252 | 1.36 | 3.34E-02 | transcription_start_site | + | 302631 | 302631 | -4583 | 24988 | AN6331 |
| 1830 | CONTIG107 | 321166 | 321603 | 1.05 | 5.49E-02 | transcription_start_site | - | 318938 | 318938 | -2446 | 25001 | AN6337 |
| 1830 | CONTIG107 | 321166 | 321603 | 1.05 | 5.49E-02 | transcription_start_site | - | 318868 | 318868 | -2516 | 25002 | AN6337 |
| 1830 | CONTIG107 | 321166 | 321603 | 1.05 | 5.49E-02 | transcription_start_site | - | 318766 | 318766 | -2618 | 25003 | AN6337 |
| 1830 | CONTIG107 | 321166 | 321603 | 1.05 | 5.49E-02 | transcription_start_site | - | 318635 | 318635 | -2749 | 25004 | AN6337 |
| 2002 | CONTIG107 | 319426 | 319775 | 0.94 | 8.54E-02 | transcription_start_site | - | 318938 | 318938 | -662  | 25001 | AN6337 |
| 2002 | CONTIG107 | 319426 | 319775 | 0.94 | 8.54E-02 | transcription_start_site | - | 318868 | 318868 | -732  | 25002 | AN6337 |
| 2002 | CONTIG107 | 319426 | 319775 | 0.94 | 8.54E-02 | transcription_start_site | - | 318766 | 318766 | -834  | 25003 | AN6337 |
| 2002 | CONTIG107 | 319426 | 319775 | 0.94 | 8.54E-02 | transcription_start_site | - | 318635 | 318635 | -965  | 25004 | AN6337 |
| 1830 | CONTIG107 | 321166 | 321603 | 1.05 | 5.49E-02 | transcription_start_site | + | 321679 | 321679 | -294  | 25005 | AN6338 |
| 1830 | CONTIG107 | 321166 | 321603 | 1.05 | 5.49E-02 | transcription_start_site | + | 321892 | 321892 | -507  | 25006 | AN6338 |
| 1830 | CONTIG107 | 321166 | 321603 | 1.05 | 5.49E-02 | transcription_start_site | + | 321984 | 321984 | -599  | 25007 | AN6338 |
| 1830 | CONTIG107 | 321166 | 321603 | 1.05 | 5.49E-02 | transcription_start_site | + | 322117 | 322117 | -732  | 25008 | AN6338 |
| 1830 | CONTIG107 | 321166 | 321603 | 1.05 | 5.49E-02 | transcription_start_site | + | 322414 | 322414 | -1029 | 25009 | AN6338 |
| 1830 | CONTIG107 | 321166 | 321603 | 1.05 | 5.49E-02 | transcription_start_site | + | 323296 | 323296 | -1911 | 25010 | AN6338 |
| 2002 | CONTIG107 | 319426 | 319775 | 0.94 | 8.54E-02 | transcription_start_site | + | 321679 | 321679 | -2078 | 25005 | AN6338 |
| 2002 | CONTIG107 | 319426 | 319775 | 0.94 | 8.54E-02 | transcription_start_site | + | 321892 | 321892 | -2291 | 25006 | AN6338 |
| 2002 | CONTIG107 | 319426 | 319775 | 0.94 | 8.54E-02 | transcription_start_site | + | 321984 | 321984 | -2383 | 25007 | AN6338 |
| 2002 | CONTIG107 | 319426 | 319775 | 0.94 | 8.54E-02 | transcription_start_site | + | 322117 | 322117 | -2516 | 25008 | AN6338 |
| 2002 | CONTIG107 | 319426 | 319775 | 0.94 | 8.54E-02 | transcription_start_site | + | 322414 | 322414 | -2813 | 25009 | AN6338 |
| 2002 | CONTIG107 | 319426 | 319775 | 0.94 | 8.54E-02 | transcription_start_site | + | 323296 | 323296 | -3695 | 25010 | AN6338 |
| 1830 | CONTIG107 | 321166 | 321603 | 1.05 | 5.49E-02 | transcription_start_site | + | 324526 | 324526 | -3141 | 25011 | AN6339 |
| 1830 | CONTIG107 | 321166 | 321603 | 1.05 | 5.49E-02 | transcription_start_site | + | 325019 | 325019 | -3634 | 25012 | AN6339 |
| 1830 | CONTIG107 | 321166 | 321603 | 1.05 | 5.49E-02 | transcription_start_site | + | 325189 | 325189 | -3804 | 25013 | AN6339 |
| 1830 | CONTIG107 | 321166 | 321603 | 1.05 | 5.49E-02 | transcription_start_site | + | 325401 | 325401 | -4016 | 25014 | AN6339 |
| 2002 | CONTIG107 | 319426 | 319775 | 0.94 | 8.54E-02 | transcription_start_site | + | 324526 | 324526 | -4925 | 25011 | AN6339 |
| 533  | CONTIG107 | 338717 | 339069 | 2.27 | 7.06E-04 | transcription_start_site | - | 337961 | 337961 | -932  | 25031 | AN6342 |
| 533  | CONTIG107 | 338717 | 339069 | 2.27 | 7.06E-04 | transcription_start_site | - | 337853 | 337853 | -1040 | 25032 | AN6342 |
| 533  | CONTIG107 | 338717 | 339069 | 2.27 | 7.06E-04 | transcription_start_site | - | 337690 | 337690 | -1203 | 25033 | AN6342 |
| 533  | CONTIG107 | 338717 | 339069 | 2.27 | 7.06E-04 | transcription_start_site | - | 337251 | 337251 | -1642 | 25034 | AN6342 |
| 533  | CONTIG107 | 338717 | 339069 | 2.27 | 7.06E-04 | transcription_start_site | - | 336926 | 336926 | -1967 | 25035 | AN6342 |
| 533  | CONTIG107 | 338717 | 339069 | 2.27 | 7.06E-04 | transcription_start_site | - | 335848 | 335848 | -3045 | 25036 | AN6342 |
| 1076 | CONTIG107 | 355129 | 355418 | 1.64 | 1.25E-02 | transcription_start_site | - | 350473 | 350473 | -4800 | 25042 | AN6346 |
| 1076 | CONTIG107 | 355129 | 355418 | 1.64 | 1.25E-02 | transcription_start_site | - | 350327 | 350327 | -4946 | 25043 | AN6346 |

|      |           |        |        |      |          |                          |   |        |        |       |       |        |
|------|-----------|--------|--------|------|----------|--------------------------|---|--------|--------|-------|-------|--------|
| 1151 | CONTIG107 | 353259 | 353685 | 1.57 | 1.54E-02 | transcription_start_site | - | 350473 | 350473 | -2999 | 25042 | AN6346 |
| 1151 | CONTIG107 | 353259 | 353685 | 1.57 | 1.54E-02 | transcription_start_site | - | 350327 | 350327 | -3145 | 25043 | AN6346 |
| 1151 | CONTIG107 | 353259 | 353685 | 1.57 | 1.54E-02 | transcription_start_site | - | 348858 | 348858 | -4614 | 25044 | AN6346 |
| 1076 | CONTIG107 | 355129 | 355418 | 1.64 | 1.25E-02 | transcription_start_site | - | 353053 | 353053 | -2220 | 25045 | AN6347 |
| 1076 | CONTIG107 | 355129 | 355418 | 1.64 | 1.25E-02 | transcription_start_site | - | 351525 | 351525 | -3748 | 25046 | AN6347 |
| 1151 | CONTIG107 | 353259 | 353685 | 1.57 | 1.54E-02 | transcription_start_site | - | 353053 | 353053 | -419  | 25045 | AN6347 |
| 1151 | CONTIG107 | 353259 | 353685 | 1.57 | 1.54E-02 | transcription_start_site | - | 351525 | 351525 | -1947 | 25046 | AN6347 |
| 1076 | CONTIG107 | 355129 | 355418 | 1.64 | 1.25E-02 | transcription_start_site | - | 355134 | 355134 | -139  | 25047 | AN6348 |
| 1076 | CONTIG107 | 355129 | 355418 | 1.64 | 1.25E-02 | transcription_start_site | - | 354484 | 354484 | -789  | 25048 | AN6348 |
| 1151 | CONTIG107 | 353259 | 353685 | 1.57 | 1.54E-02 | transcription_start_site | - | 354484 | 354484 | 1012  | 25048 | AN6348 |
| 1076 | CONTIG107 | 355129 | 355418 | 1.64 | 1.25E-02 | transcription_start_site | + | 355527 | 355527 | -253  | 25049 | AN6349 |
| 1076 | CONTIG107 | 355129 | 355418 | 1.64 | 1.25E-02 | transcription_start_site | + | 355751 | 355751 | -477  | 25050 | AN6349 |
| 1076 | CONTIG107 | 355129 | 355418 | 1.64 | 1.25E-02 | transcription_start_site | + | 356508 | 356508 | -1234 | 25051 | AN6349 |
| 1076 | CONTIG107 | 355129 | 355418 | 1.64 | 1.25E-02 | transcription_start_site | + | 356760 | 356760 | -1486 | 25052 | AN6349 |
| 1076 | CONTIG107 | 355129 | 355418 | 1.64 | 1.25E-02 | transcription_start_site | + | 357771 | 357771 | -2497 | 25053 | AN6349 |
| 1076 | CONTIG107 | 355129 | 355418 | 1.64 | 1.25E-02 | transcription_start_site | + | 358059 | 358059 | -2785 | 25054 | AN6349 |
| 1076 | CONTIG107 | 355129 | 355418 | 1.64 | 1.25E-02 | transcription_start_site | + | 358338 | 358338 | -3064 | 25055 | AN6349 |
| 1076 | CONTIG107 | 355129 | 355418 | 1.64 | 1.25E-02 | transcription_start_site | + | 358694 | 358694 | -3420 | 25056 | AN6349 |
| 1076 | CONTIG107 | 355129 | 355418 | 1.64 | 1.25E-02 | transcription_start_site | + | 359261 | 359261 | -3987 | 25057 | AN6349 |
| 1076 | CONTIG107 | 355129 | 355418 | 1.64 | 1.25E-02 | transcription_start_site | + | 359452 | 359452 | -4178 | 25058 | AN6349 |
| 1076 | CONTIG107 | 355129 | 355418 | 1.64 | 1.25E-02 | transcription_start_site | + | 360125 | 360125 | -4851 | 25059 | AN6349 |
| 1151 | CONTIG107 | 353259 | 353685 | 1.57 | 1.54E-02 | transcription_start_site | + | 355527 | 355527 | -2055 | 25049 | AN6349 |
| 1151 | CONTIG107 | 353259 | 353685 | 1.57 | 1.54E-02 | transcription_start_site | + | 355751 | 355751 | -2279 | 25050 | AN6349 |
| 1151 | CONTIG107 | 353259 | 353685 | 1.57 | 1.54E-02 | transcription_start_site | + | 356508 | 356508 | -3036 | 25051 | AN6349 |
| 1151 | CONTIG107 | 353259 | 353685 | 1.57 | 1.54E-02 | transcription_start_site | + | 356760 | 356760 | -3288 | 25052 | AN6349 |
| 1151 | CONTIG107 | 353259 | 353685 | 1.57 | 1.54E-02 | transcription_start_site | + | 357771 | 357771 | -4299 | 25053 | AN6349 |
| 1151 | CONTIG107 | 353259 | 353685 | 1.57 | 1.54E-02 | transcription_start_site | + | 358059 | 358059 | -4587 | 25054 | AN6349 |
| 1151 | CONTIG107 | 353259 | 353685 | 1.57 | 1.54E-02 | transcription_start_site | + | 358338 | 358338 | -4866 | 25055 | AN6349 |
| 2323 | CONTIG107 | 362037 | 362906 | 0.63 | 1.13E-01 | transcription_start_site | + | 361327 | 361327 | 1144  | 25060 | AN6350 |
| 77   | CONTIG107 | 364652 | 365166 | 3.15 | 0.00E+00 | transcription_start_site | + | 364584 | 364584 | 325   | 25066 | AN6351 |
| 77   | CONTIG107 | 364652 | 365166 | 3.15 | 0.00E+00 | transcription_start_site | + | 364418 | 364418 | 491   | 25065 | AN6351 |
| 2323 | CONTIG107 | 362037 | 362906 | 0.63 | 1.13E-01 | transcription_start_site | + | 362585 | 362585 | -113  | 25061 | AN6351 |
| 2323 | CONTIG107 | 362037 | 362906 | 0.63 | 1.13E-01 | transcription_start_site | + | 362723 | 362723 | -251  | 25062 | AN6351 |
| 2323 | CONTIG107 | 362037 | 362906 | 0.63 | 1.13E-01 | transcription_start_site | + | 363037 | 363037 | -565  | 25063 | AN6351 |
| 2323 | CONTIG107 | 362037 | 362906 | 0.63 | 1.13E-01 | transcription_start_site | + | 363353 | 363353 | -881  | 25064 | AN6351 |
| 2323 | CONTIG107 | 362037 | 362906 | 0.63 | 1.13E-01 | transcription_start_site | + | 364418 | 364418 | -1946 | 25065 | AN6351 |
| 2323 | CONTIG107 | 362037 | 362906 | 0.63 | 1.13E-01 | transcription_start_site | + | 364584 | 364584 | -2112 | 25066 | AN6351 |
| 77   | CONTIG107 | 364652 | 365166 | 3.15 | 0.00E+00 | transcription_start_site | + | 365784 | 365784 | -875  | 25067 | AN6352 |
| 77   | CONTIG107 | 364652 | 365166 | 3.15 | 0.00E+00 | transcription_start_site | + | 366779 | 366779 | -1870 | 25068 | AN6352 |
| 2323 | CONTIG107 | 362037 | 362906 | 0.63 | 1.13E-01 | transcription_start_site | + | 365784 | 365784 | -3312 | 25067 | AN6352 |
| 2323 | CONTIG107 | 362037 | 362906 | 0.63 | 1.13E-01 | transcription_start_site | + | 366779 | 366779 | -4307 | 25068 | AN6352 |
| 2008 | CONTIG107 | 388579 | 389303 | 0.94 | 1.38E-01 | transcription_start_site | - | 384401 | 384401 | -4540 | 25080 | AN6358 |
| 2049 | CONTIG107 | 387904 | 388328 | 0.91 | 9.90E-02 | transcription_start_site | - | 384401 | 384401 | -3715 | 25080 | AN6358 |
| 2008 | CONTIG107 | 388579 | 389303 | 0.94 | 1.38E-01 | transcription_start_site | - | 387808 | 387808 | -1133 | 25081 | AN6359 |
| 2008 | CONTIG107 | 388579 | 389303 | 0.94 | 1.38E-01 | transcription_start_site | - | 387398 | 387398 | -1543 | 25082 | AN6359 |
| 2049 | CONTIG107 | 387904 | 388328 | 0.91 | 9.90E-02 | transcription_start_site | - | 387808 | 387808 | -308  | 25081 | AN6359 |
| 2049 | CONTIG107 | 387904 | 388328 | 0.91 | 9.90E-02 | transcription_start_site | - | 387398 | 387398 | -718  | 25082 | AN6359 |
| 2008 | CONTIG107 | 388579 | 389303 | 0.94 | 1.38E-01 | transcription_start_site | + | 389079 | 389079 | -138  | 25083 | AN6360 |
| 2049 | CONTIG107 | 387904 | 388328 | 0.91 | 9.90E-02 | transcription_start_site | + | 389079 | 389079 | -963  | 25083 | AN6360 |
| 2008 | CONTIG107 | 388579 | 389303 | 0.94 | 1.38E-01 | transcription_start_site | + | 392420 | 392420 | -3479 | 25088 | AN6362 |
| 2008 | CONTIG107 | 388579 | 389303 | 0.94 | 1.38E-01 | transcription_start_site | + | 392786 | 392786 | -3845 | 25089 | AN6362 |
| 2049 | CONTIG107 | 387904 | 388328 | 0.91 | 9.90E-02 | transcription_start_site | + | 392420 | 392420 | -4304 | 25088 | AN6362 |
| 2049 | CONTIG107 | 387904 | 388328 | 0.91 | 9.90E-02 | transcription_start_site | + | 392786 | 392786 | -4670 | 25089 | AN6362 |
| 1789 | CONTIG107 | 403056 | 403330 | 1.08 | 8.63E-02 | transcription_start_site | - | 400056 | 400056 | -3137 | 25095 | AN6365 |
| 1789 | CONTIG107 | 403056 | 403330 | 1.08 | 8.63E-02 | transcription_start_site | - | 399827 | 399827 | -3366 | 25096 | AN6365 |
| 2050 | CONTIG107 | 400351 | 400865 | 0.91 | 9.90E-02 | transcription_start_site | - | 400056 | 400056 | -552  | 25095 | AN6365 |
| 2050 | CONTIG107 | 400351 | 400865 | 0.91 | 9.90E-02 | transcription_start_site | - | 399827 | 399827 | -781  | 25096 | AN6365 |

|      |           |        |        |      |          |                          |   |        |        |       |       |        |
|------|-----------|--------|--------|------|----------|--------------------------|---|--------|--------|-------|-------|--------|
| 2050 | CONTIG107 | 400351 | 400865 | 0.91 | 9.90E-02 | transcription_start_site | + | 400619 | 400619 | -11   | 25097 | AN6366 |
| 2050 | CONTIG107 | 400351 | 400865 | 0.91 | 9.90E-02 | transcription_start_site | + | 400681 | 400681 | -73   | 25098 | AN6366 |
| 2050 | CONTIG107 | 400351 | 400865 | 0.91 | 9.90E-02 | transcription_start_site | + | 400894 | 400894 | -286  | 25099 | AN6366 |
| 2050 | CONTIG107 | 400351 | 400865 | 0.91 | 9.90E-02 | transcription_start_site | + | 401571 | 401571 | -963  | 25100 | AN6366 |
| 1789 | CONTIG107 | 403056 | 403330 | 1.08 | 8.63E-02 | transcription_start_site | - | 403091 | 403091 | -102  | 25101 | AN6367 |
| 1789 | CONTIG107 | 403056 | 403330 | 1.08 | 8.63E-02 | transcription_start_site | - | 402762 | 402762 | -431  | 25102 | AN6367 |
| 1789 | CONTIG107 | 403056 | 403330 | 1.08 | 8.63E-02 | transcription_start_site | + | 403553 | 403553 | -360  | 25103 | AN6368 |
| 1789 | CONTIG107 | 403056 | 403330 | 1.08 | 8.63E-02 | transcription_start_site | + | 403840 | 403840 | -647  | 25104 | AN6368 |
| 1789 | CONTIG107 | 403056 | 403330 | 1.08 | 8.63E-02 | transcription_start_site | + | 405196 | 405196 | -2003 | 25105 | AN6368 |
| 1789 | CONTIG107 | 403056 | 403330 | 1.08 | 8.63E-02 | transcription_start_site | + | 405661 | 405661 | -2468 | 25106 | AN6368 |
| 2050 | CONTIG107 | 400351 | 400865 | 0.91 | 9.90E-02 | transcription_start_site | + | 403553 | 403553 | -2945 | 25103 | AN6368 |
| 2050 | CONTIG107 | 400351 | 400865 | 0.91 | 9.90E-02 | transcription_start_site | + | 403840 | 403840 | -3232 | 25104 | AN6368 |
| 2050 | CONTIG107 | 400351 | 400865 | 0.91 | 9.90E-02 | transcription_start_site | + | 405196 | 405196 | -4588 | 25105 | AN6368 |
| 2050 | CONTIG107 | 400351 | 400865 | 0.91 | 9.90E-02 | transcription_start_site | + | 405661 | 405661 | -5053 | 25106 | AN6368 |
| 1789 | CONTIG107 | 403056 | 403330 | 1.08 | 8.63E-02 | transcription_start_site | + | 406670 | 406670 | -3477 | 25107 | AN6369 |
| 1789 | CONTIG107 | 403056 | 403330 | 1.08 | 8.63E-02 | transcription_start_site | + | 406949 | 406949 | -3756 | 25108 | AN6369 |
| 1789 | CONTIG107 | 403056 | 403330 | 1.08 | 8.63E-02 | transcription_start_site | + | 407244 | 407244 | -4051 | 25109 | AN6369 |
| 1789 | CONTIG107 | 403056 | 403330 | 1.08 | 8.63E-02 | transcription_start_site | + | 407626 | 407626 | -4433 | 25110 | AN6369 |
| 1789 | CONTIG107 | 403056 | 403330 | 1.08 | 8.63E-02 | transcription_start_site | + | 408043 | 408043 | -4850 | 25111 | AN6369 |
| 1789 | CONTIG107 | 403056 | 403330 | 1.08 | 8.63E-02 | transcription_start_site | + | 408172 | 408172 | -4979 | 25112 | AN6369 |
| 589  | CONTIG107 | 414996 | 415330 | 2.2  | 1.09E-03 | transcription_start_site | - | 413017 | 413017 | -2146 | 25116 | AN6370 |
| 589  | CONTIG107 | 414996 | 415330 | 2.2  | 1.09E-03 | transcription_start_site | + | 417177 | 417177 | -2014 | 25117 | AN6371 |
| 1470 | CONTIG108 | 14343  | 14693  | 1.29 | 1.61E-02 | transcription_start_site | + | 13847  | 13847  | 671   | 25173 | AN6386 |
| 1470 | CONTIG108 | 14343  | 14693  | 1.29 | 1.61E-02 | transcription_start_site | + | 13695  | 13695  | 823   | 25172 | AN6386 |
| 1470 | CONTIG108 | 14343  | 14693  | 1.29 | 1.61E-02 | transcription_start_site | + | 14772  | 14772  | -254  | 25174 | AN6387 |
| 1470 | CONTIG108 | 14343  | 14693  | 1.29 | 1.61E-02 | transcription_start_site | + | 14925  | 14925  | -407  | 25175 | AN6387 |
| 1470 | CONTIG108 | 14343  | 14693  | 1.29 | 1.61E-02 | transcription_start_site | + | 15164  | 15164  | -646  | 25176 | AN6387 |
| 1921 | CONTIG108 | 28428  | 28707  | 0.99 | 9.60E-02 | transcription_start_site | - | 28197  | 28197  | -370  | 25192 | AN6391 |
| 1921 | CONTIG108 | 28428  | 28707  | 0.99 | 9.60E-02 | transcription_start_site | - | 27980  | 27980  | -587  | 25193 | AN6391 |
| 1921 | CONTIG108 | 28428  | 28707  | 0.99 | 9.60E-02 | transcription_start_site | - | 27833  | 27833  | -734  | 25194 | AN6391 |
| 1921 | CONTIG108 | 28428  | 28707  | 0.99 | 9.60E-02 | transcription_start_site | - | 27675  | 27675  | -892  | 25195 | AN6391 |
| 1921 | CONTIG108 | 28428  | 28707  | 0.99 | 9.60E-02 | transcription_start_site | - | 27097  | 27097  | -1470 | 25196 | AN6391 |
| 1921 | CONTIG108 | 28428  | 28707  | 0.99 | 9.60E-02 | transcription_start_site | - | 26976  | 26976  | -1591 | 25197 | AN6391 |
| 1968 | CONTIG108 | 29868  | 30592  | 0.96 | 4.51E-02 | transcription_start_site | - | 28197  | 28197  | -2033 | 25192 | AN6391 |
| 1968 | CONTIG108 | 29868  | 30592  | 0.96 | 4.51E-02 | transcription_start_site | - | 27980  | 27980  | -2250 | 25193 | AN6391 |
| 1968 | CONTIG108 | 29868  | 30592  | 0.96 | 4.51E-02 | transcription_start_site | - | 27833  | 27833  | -2397 | 25194 | AN6391 |
| 1968 | CONTIG108 | 29868  | 30592  | 0.96 | 4.51E-02 | transcription_start_site | - | 27675  | 27675  | -2555 | 25195 | AN6391 |
| 1968 | CONTIG108 | 29868  | 30592  | 0.96 | 4.51E-02 | transcription_start_site | - | 27097  | 27097  | -3133 | 25196 | AN6391 |
| 1968 | CONTIG108 | 29868  | 30592  | 0.96 | 4.51E-02 | transcription_start_site | - | 26976  | 26976  | -3254 | 25197 | AN6391 |
| 1921 | CONTIG108 | 28428  | 28707  | 0.99 | 9.60E-02 | transcription_start_site | + | 30753  | 30753  | -2185 | 25198 | AN6392 |
| 1921 | CONTIG108 | 28428  | 28707  | 0.99 | 9.60E-02 | transcription_start_site | + | 31263  | 31263  | -2695 | 25199 | AN6392 |
| 1921 | CONTIG108 | 28428  | 28707  | 0.99 | 9.60E-02 | transcription_start_site | + | 31530  | 31530  | -2962 | 25200 | AN6392 |
| 1921 | CONTIG108 | 28428  | 28707  | 0.99 | 9.60E-02 | transcription_start_site | + | 31708  | 31708  | -3140 | 25201 | AN6392 |
| 1921 | CONTIG108 | 28428  | 28707  | 0.99 | 9.60E-02 | transcription_start_site | + | 32384  | 32384  | -3816 | 25202 | AN6392 |
| 1968 | CONTIG108 | 29868  | 30592  | 0.96 | 4.51E-02 | transcription_start_site | + | 30753  | 30753  | -523  | 25198 | AN6392 |
| 1968 | CONTIG108 | 29868  | 30592  | 0.96 | 4.51E-02 | transcription_start_site | + | 31263  | 31263  | -1033 | 25199 | AN6392 |
| 1968 | CONTIG108 | 29868  | 30592  | 0.96 | 4.51E-02 | transcription_start_site | + | 31530  | 31530  | -1300 | 25200 | AN6392 |
| 1968 | CONTIG108 | 29868  | 30592  | 0.96 | 4.51E-02 | transcription_start_site | + | 31708  | 31708  | -1478 | 25201 | AN6392 |
| 1968 | CONTIG108 | 29868  | 30592  | 0.96 | 4.51E-02 | transcription_start_site | + | 32384  | 32384  | -2154 | 25202 | AN6392 |
| 1921 | CONTIG108 | 28428  | 28707  | 0.99 | 9.60E-02 | transcription_start_site | + | 32723  | 32723  | -4155 | 25203 | AN6393 |
| 1921 | CONTIG108 | 28428  | 28707  | 0.99 | 9.60E-02 | transcription_start_site | + | 32931  | 32931  | -4363 | 25204 | AN6393 |
| 1921 | CONTIG108 | 28428  | 28707  | 0.99 | 9.60E-02 | transcription_start_site | + | 33402  | 33402  | -4834 | 25205 | AN6393 |
| 1968 | CONTIG108 | 29868  | 30592  | 0.96 | 4.51E-02 | transcription_start_site | + | 32723  | 32723  | -2493 | 25203 | AN6393 |
| 1968 | CONTIG108 | 29868  | 30592  | 0.96 | 4.51E-02 | transcription_start_site | + | 32931  | 32931  | -2701 | 25204 | AN6393 |
| 1968 | CONTIG108 | 29868  | 30592  | 0.96 | 4.51E-02 | transcription_start_site | + | 33402  | 33402  | -3172 | 25205 | AN6393 |
| 1968 | CONTIG108 | 29868  | 30592  | 0.96 | 4.51E-02 | transcription_start_site | + | 34077  | 34077  | -3847 | 25206 | AN6394 |
| 1968 | CONTIG108 | 29868  | 30592  | 0.96 | 4.51E-02 | transcription_start_site | + | 34756  | 34756  | -4526 | 25207 | AN6394 |

|      |           |        |        |      |          |                          |   |        |        |       |       |        |
|------|-----------|--------|--------|------|----------|--------------------------|---|--------|--------|-------|-------|--------|
| 1968 | CONTIG108 | 29868  | 30592  | 0.96 | 4.51E-02 | transcription_start_site | + | 35046  | 35046  | -4816 | 25208 | AN6394 |
| 2125 | CONTIG108 | 44857  | 45281  | 0.86 | 1.54E-01 | transcription_start_site | - | 41345  | 41345  | -3724 | 25213 | AN6396 |
| 2125 | CONTIG108 | 44857  | 45281  | 0.86 | 1.54E-01 | transcription_start_site | - | 41163  | 41163  | -3906 | 25214 | AN6396 |
| 2125 | CONTIG108 | 44857  | 45281  | 0.86 | 1.54E-01 | transcription_start_site | - | 41027  | 41027  | -4042 | 25215 | AN6396 |
| 2125 | CONTIG108 | 44857  | 45281  | 0.86 | 1.54E-01 | transcription_start_site | - | 39867  | 39867  | -5202 | 25216 | AN6396 |
| 2125 | CONTIG108 | 44857  | 45281  | 0.86 | 1.54E-01 | transcription_start_site | + | 44621  | 44621  | 448   | 25220 | AN6397 |
| 2125 | CONTIG108 | 44857  | 45281  | 0.86 | 1.54E-01 | transcription_start_site | + | 45106  | 45106  | -37   | 25221 | AN6398 |
| 2125 | CONTIG108 | 44857  | 45281  | 0.86 | 1.54E-01 | transcription_start_site | + | 47270  | 47270  | -2201 | 25222 | AN6399 |
| 2125 | CONTIG108 | 44857  | 45281  | 0.86 | 1.54E-01 | transcription_start_site | + | 47581  | 47581  | -2512 | 25223 | AN6399 |
| 2125 | CONTIG108 | 44857  | 45281  | 0.86 | 1.54E-01 | transcription_start_site | + | 48497  | 48497  | -3428 | 25224 | AN6399 |
| 2125 | CONTIG108 | 44857  | 45281  | 0.86 | 1.54E-01 | transcription_start_site | + | 50219  | 50219  | -5150 | 25225 | AN6400 |
| 499  | CONTIG108 | 58817  | 59154  | 2.31 | 0.00E+00 | transcription_start_site | - | 58669  | 58669  | -316  | 25236 | AN6402 |
| 499  | CONTIG108 | 58817  | 59154  | 2.31 | 0.00E+00 | transcription_start_site | - | 58321  | 58321  | -664  | 25237 | AN6402 |
| 499  | CONTIG108 | 58817  | 59154  | 2.31 | 0.00E+00 | transcription_start_site | - | 57282  | 57282  | -1703 | 25238 | AN6402 |
| 1036 | CONTIG108 | 57232  | 57517  | 1.68 | 7.70E-03 | transcription_start_site | - | 57282  | 57282  | -92   | 25238 | AN6402 |
| 1036 | CONTIG108 | 57232  | 57517  | 1.68 | 7.70E-03 | transcription_start_site | - | 58321  | 58321  | 946   | 25237 | AN6402 |
| 499  | CONTIG108 | 58817  | 59154  | 2.31 | 0.00E+00 | transcription_start_site | + | 59388  | 59388  | -402  | 25239 | AN6403 |
| 499  | CONTIG108 | 58817  | 59154  | 2.31 | 0.00E+00 | transcription_start_site | + | 59788  | 59788  | -802  | 25240 | AN6403 |
| 499  | CONTIG108 | 58817  | 59154  | 2.31 | 0.00E+00 | transcription_start_site | + | 59875  | 59875  | -889  | 25241 | AN6403 |
| 499  | CONTIG108 | 58817  | 59154  | 2.31 | 0.00E+00 | transcription_start_site | + | 60398  | 60398  | -1412 | 25242 | AN6403 |
| 1036 | CONTIG108 | 57232  | 57517  | 1.68 | 7.70E-03 | transcription_start_site | + | 59388  | 59388  | -2013 | 25239 | AN6403 |
| 1036 | CONTIG108 | 57232  | 57517  | 1.68 | 7.70E-03 | transcription_start_site | + | 59788  | 59788  | -2413 | 25240 | AN6403 |
| 1036 | CONTIG108 | 57232  | 57517  | 1.68 | 7.70E-03 | transcription_start_site | + | 59875  | 59875  | -2500 | 25241 | AN6403 |
| 1036 | CONTIG108 | 57232  | 57517  | 1.68 | 7.70E-03 | transcription_start_site | + | 60398  | 60398  | -3023 | 25242 | AN6403 |
| 499  | CONTIG108 | 58817  | 59154  | 2.31 | 0.00E+00 | transcription_start_site | + | 63451  | 63451  | -4465 | 25243 | AN6404 |
| 1432 | CONTIG108 | 66155  | 66429  | 1.32 | 3.01E-02 | transcription_start_site | - | 66353  | 66353  | 61    | 25244 | AN6405 |
| 1432 | CONTIG108 | 66155  | 66429  | 1.32 | 3.01E-02 | transcription_start_site | - | 66115  | 66115  | -177  | 25245 | AN6405 |
| 1432 | CONTIG108 | 66155  | 66429  | 1.32 | 3.01E-02 | transcription_start_site | - | 65505  | 65505  | -787  | 25246 | AN6405 |
| 1432 | CONTIG108 | 66155  | 66429  | 1.32 | 3.01E-02 | transcription_start_site | - | 65450  | 65450  | -842  | 25247 | AN6405 |
| 1432 | CONTIG108 | 66155  | 66429  | 1.32 | 3.01E-02 | transcription_start_site | + | 66621  | 66621  | -329  | 25248 | AN6406 |
| 1432 | CONTIG108 | 66155  | 66429  | 1.32 | 3.01E-02 | transcription_start_site | + | 67013  | 67013  | -721  | 25249 | AN6406 |
| 1432 | CONTIG108 | 66155  | 66429  | 1.32 | 3.01E-02 | transcription_start_site | + | 71154  | 71154  | -4862 | 25250 | AN6407 |
| 1432 | CONTIG108 | 66155  | 66429  | 1.32 | 3.01E-02 | transcription_start_site | + | 71252  | 71252  | -4960 | 25251 | AN6407 |
| 578  | CONTIG108 | 86868  | 87202  | 2.21 | 2.06E-04 | transcription_start_site | + | 87618  | 87618  | -583  | 25271 | AN6413 |
| 578  | CONTIG108 | 86868  | 87202  | 2.21 | 2.06E-04 | transcription_start_site | + | 87842  | 87842  | -807  | 25272 | AN6413 |
| 578  | CONTIG108 | 86868  | 87202  | 2.21 | 2.06E-04 | transcription_start_site | + | 88415  | 88415  | -1380 | 25273 | AN6413 |
| 578  | CONTIG108 | 86868  | 87202  | 2.21 | 2.06E-04 | transcription_start_site | + | 90294  | 90294  | -3259 | 25274 | AN6414 |
| 578  | CONTIG108 | 86868  | 87202  | 2.21 | 2.06E-04 | transcription_start_site | + | 90425  | 90425  | -3390 | 25275 | AN6414 |
| 578  | CONTIG108 | 86868  | 87202  | 2.21 | 2.06E-04 | transcription_start_site | + | 90557  | 90557  | -3522 | 25276 | AN6414 |
| 578  | CONTIG108 | 86868  | 87202  | 2.21 | 2.06E-04 | transcription_start_site | + | 91280  | 91280  | -4245 | 25277 | AN6414 |
| 1131 | CONTIG108 | 123766 | 124100 | 1.58 | 1.06E-02 | transcription_start_site | - | 123766 | 123766 | -167  | 25319 | AN6426 |
| 1131 | CONTIG108 | 123766 | 124100 | 1.58 | 1.06E-02 | transcription_start_site | - | 123232 | 123232 | -701  | 25320 | AN6426 |
| 1131 | CONTIG108 | 123766 | 124100 | 1.58 | 1.06E-02 | transcription_start_site | + | 129050 | 129050 | -5117 | 25326 | AN6428 |
| 531  | CONTIG108 | 165453 | 165812 | 2.27 | 2.51E-04 | transcription_start_site | + | 166474 | 166474 | -841  | 25367 | AN6437 |
| 531  | CONTIG108 | 165453 | 165812 | 2.27 | 2.51E-04 | transcription_start_site | + | 166651 | 166651 | -1018 | 25368 | AN6437 |
| 915  | CONTIG108 | 180685 | 180967 | 1.81 | 4.57E-03 | transcription_start_site | - | 176596 | 176596 | -4230 | 25369 | AN6438 |
| 915  | CONTIG108 | 180685 | 180967 | 1.81 | 4.57E-03 | transcription_start_site | - | 176531 | 176531 | -4295 | 25370 | AN6438 |
| 433  | CONTIG108 | 182780 | 183134 | 2.41 | 0.00E+00 | transcription_start_site | - | 178283 | 178283 | -4674 | 25371 | AN6439 |
| 433  | CONTIG108 | 182780 | 183134 | 2.41 | 0.00E+00 | transcription_start_site | - | 178062 | 178062 | -4895 | 25372 | AN6439 |
| 915  | CONTIG108 | 180685 | 180967 | 1.81 | 4.57E-03 | transcription_start_site | - | 178283 | 178283 | -2543 | 25371 | AN6439 |
| 915  | CONTIG108 | 180685 | 180967 | 1.81 | 4.57E-03 | transcription_start_site | - | 178062 | 178062 | -2764 | 25372 | AN6439 |
| 433  | CONTIG108 | 182780 | 183134 | 2.41 | 0.00E+00 | transcription_start_site | - | 180220 | 180220 | -2737 | 25373 | AN6440 |
| 433  | CONTIG108 | 182780 | 183134 | 2.41 | 0.00E+00 | transcription_start_site | - | 179927 | 179927 | -3030 | 25374 | AN6440 |
| 915  | CONTIG108 | 180685 | 180967 | 1.81 | 4.57E-03 | transcription_start_site | - | 180220 | 180220 | -606  | 25373 | AN6440 |
| 915  | CONTIG108 | 180685 | 180967 | 1.81 | 4.57E-03 | transcription_start_site | - | 179927 | 179927 | -899  | 25374 | AN6440 |
| 433  | CONTIG108 | 182780 | 183134 | 2.41 | 0.00E+00 | transcription_start_site | + | 181874 | 181874 | 1083  | 25377 | AN6441 |
| 915  | CONTIG108 | 180685 | 180967 | 1.81 | 4.57E-03 | transcription_start_site | + | 181181 | 181181 | -355  | 25375 | AN6441 |

|      |           |        |        |      |          |                          |   |        |        |       |       |        |
|------|-----------|--------|--------|------|----------|--------------------------|---|--------|--------|-------|-------|--------|
| 915  | CONTIG108 | 180685 | 180967 | 1.81 | 4.57E-03 | transcription_start_site | + | 181412 | 181412 | -586  | 25376 | AN6441 |
| 915  | CONTIG108 | 180685 | 180967 | 1.81 | 4.57E-03 | transcription_start_site | + | 181874 | 181874 | -1048 | 25377 | AN6441 |
| 433  | CONTIG108 | 182780 | 183134 | 2.41 | 0.00E+00 | transcription_start_site | + | 185622 | 185622 | -2665 | 25378 | AN6442 |
| 433  | CONTIG108 | 182780 | 183134 | 2.41 | 0.00E+00 | transcription_start_site | + | 185823 | 185823 | -2866 | 25379 | AN6442 |
| 433  | CONTIG108 | 182780 | 183134 | 2.41 | 0.00E+00 | transcription_start_site | + | 186330 | 186330 | -3373 | 25380 | AN6442 |
| 433  | CONTIG108 | 182780 | 183134 | 2.41 | 0.00E+00 | transcription_start_site | + | 186626 | 186626 | -3669 | 25381 | AN6442 |
| 433  | CONTIG108 | 182780 | 183134 | 2.41 | 0.00E+00 | transcription_start_site | + | 187131 | 187131 | -4174 | 25382 | AN6442 |
| 433  | CONTIG108 | 182780 | 183134 | 2.41 | 0.00E+00 | transcription_start_site | + | 187551 | 187551 | -4594 | 25383 | AN6442 |
| 434  | CONTIG108 | 187061 | 187570 | 2.41 | 0.00E+00 | transcription_start_site | + | 187131 | 187131 | 184   | 25382 | AN6442 |
| 434  | CONTIG108 | 187061 | 187570 | 2.41 | 0.00E+00 | transcription_start_site | + | 187551 | 187551 | -235  | 25383 | AN6442 |
| 434  | CONTIG108 | 187061 | 187570 | 2.41 | 0.00E+00 | transcription_start_site | + | 186626 | 186626 | 689   | 25381 | AN6442 |
| 434  | CONTIG108 | 187061 | 187570 | 2.41 | 0.00E+00 | transcription_start_site | + | 186330 | 186330 | 985   | 25380 | AN6442 |
| 434  | CONTIG108 | 187061 | 187570 | 2.41 | 0.00E+00 | transcription_start_site | + | 189047 | 189047 | -1731 | 25384 | AN6442 |
| 915  | CONTIG108 | 180685 | 180967 | 1.81 | 4.57E-03 | transcription_start_site | + | 185622 | 185622 | -4796 | 25378 | AN6442 |
| 915  | CONTIG108 | 180685 | 180967 | 1.81 | 4.57E-03 | transcription_start_site | + | 185823 | 185823 | -4997 | 25379 | AN6442 |
| 1616 | CONTIG108 | 193351 | 193788 | 1.19 | 4.78E-02 | transcription_start_site | - | 193571 | 193571 | 1     | 25385 | AN6443 |
| 1616 | CONTIG108 | 193351 | 193788 | 1.19 | 4.78E-02 | transcription_start_site | - | 193266 | 193266 | -303  | 25386 | AN6443 |
| 1616 | CONTIG108 | 193351 | 193788 | 1.19 | 4.78E-02 | transcription_start_site | - | 194728 | 194728 | 1158  | 25388 | AN6444 |
| 1616 | CONTIG108 | 193351 | 193788 | 1.19 | 4.78E-02 | transcription_start_site | + | 198190 | 198190 | -4620 | 25389 | AN6445 |
| 1616 | CONTIG108 | 193351 | 193788 | 1.19 | 4.78E-02 | transcription_start_site | + | 198454 | 198454 | -4884 | 25390 | AN6445 |
| 1616 | CONTIG108 | 193351 | 193788 | 1.19 | 4.78E-02 | transcription_start_site | + | 198625 | 198625 | -5055 | 25391 | AN6445 |
| 2033 | CONTIG108 | 252540 | 253119 | 0.92 | 7.38E-02 | transcription_start_site | - | 252579 | 252579 | -250  | 25460 | AN6461 |
| 2033 | CONTIG108 | 252540 | 253119 | 0.92 | 7.38E-02 | transcription_start_site | - | 252329 | 252329 | -500  | 25461 | AN6461 |
| 2033 | CONTIG108 | 252540 | 253119 | 0.92 | 7.38E-02 | transcription_start_site | - | 252178 | 252178 | -651  | 25462 | AN6461 |
| 2033 | CONTIG108 | 252540 | 253119 | 0.92 | 7.38E-02 | transcription_start_site | - | 251811 | 251811 | -1018 | 25463 | AN6461 |
| 2033 | CONTIG108 | 252540 | 253119 | 0.92 | 7.38E-02 | transcription_start_site | - | 250897 | 250897 | -1932 | 25464 | AN6461 |
| 2033 | CONTIG108 | 252540 | 253119 | 0.92 | 7.38E-02 | transcription_start_site | + | 253301 | 253301 | -471  | 25465 | AN6462 |
| 2033 | CONTIG108 | 252540 | 253119 | 0.92 | 7.38E-02 | transcription_start_site | + | 253458 | 253458 | -628  | 25466 | AN6462 |
| 2033 | CONTIG108 | 252540 | 253119 | 0.92 | 7.38E-02 | transcription_start_site | + | 253909 | 253909 | -1079 | 25467 | AN6462 |
| 2033 | CONTIG108 | 252540 | 253119 | 0.92 | 7.38E-02 | transcription_start_site | + | 254368 | 254368 | -1538 | 25468 | AN6462 |
| 2126 | CONTIG108 | 261238 | 261819 | 0.86 | 1.54E-01 | transcription_start_site | + | 261372 | 261372 | 156   | 25469 | AN6463 |
| 2126 | CONTIG108 | 261238 | 261819 | 0.86 | 1.54E-01 | transcription_start_site | + | 261772 | 261772 | -243  | 25470 | AN6463 |
| 557  | CONTIG108 | 306167 | 306577 | 2.24 | 2.26E-04 | transcription_start_site | - | 305631 | 305631 | -741  | 25505 | AN6472 |
| 557  | CONTIG108 | 306167 | 306577 | 2.24 | 2.26E-04 | transcription_start_site | - | 305019 | 305019 | -1353 | 25506 | AN6472 |
| 2235 | CONTIG108 | 318092 | 318801 | 0.76 | 1.57E-01 | transcription_start_site | - | 317919 | 317919 | -527  | 25522 | AN6475 |
| 2235 | CONTIG108 | 318092 | 318801 | 0.76 | 1.57E-01 | transcription_start_site | - | 319030 | 319030 | 583   | 25521 | AN6475 |
| 2235 | CONTIG108 | 318092 | 318801 | 0.76 | 1.57E-01 | transcription_start_site | - | 317714 | 317714 | -732  | 25523 | AN6475 |
| 2235 | CONTIG108 | 318092 | 318801 | 0.76 | 1.57E-01 | transcription_start_site | - | 317646 | 317646 | -800  | 25524 | AN6475 |
| 2235 | CONTIG108 | 318092 | 318801 | 0.76 | 1.57E-01 | transcription_start_site | - | 317422 | 317422 | -1024 | 25525 | AN6475 |
| 2235 | CONTIG108 | 318092 | 318801 | 0.76 | 1.57E-01 | transcription_start_site | - | 317359 | 317359 | -1087 | 25526 | AN6475 |
| 2235 | CONTIG108 | 318092 | 318801 | 0.76 | 1.57E-01 | transcription_start_site | - | 317261 | 317261 | -1185 | 25527 | AN6475 |
| 2235 | CONTIG108 | 318092 | 318801 | 0.76 | 1.57E-01 | transcription_start_site | - | 317166 | 317166 | -1280 | 25528 | AN6475 |
| 2235 | CONTIG108 | 318092 | 318801 | 0.76 | 1.57E-01 | transcription_start_site | - | 317013 | 317013 | -1433 | 25529 | AN6475 |
| 2235 | CONTIG108 | 318092 | 318801 | 0.76 | 1.57E-01 | transcription_start_site | - | 316820 | 316820 | -1626 | 25530 | AN6475 |
| 2235 | CONTIG108 | 318092 | 318801 | 0.76 | 1.57E-01 | transcription_start_site | - | 316641 | 316641 | -1805 | 25531 | AN6475 |
| 2235 | CONTIG108 | 318092 | 318801 | 0.76 | 1.57E-01 | transcription_start_site | - | 316552 | 316552 | -1894 | 25532 | AN6475 |
| 2235 | CONTIG108 | 318092 | 318801 | 0.76 | 1.57E-01 | transcription_start_site | - | 316419 | 316419 | -2027 | 25533 | AN6475 |
| 2235 | CONTIG108 | 318092 | 318801 | 0.76 | 1.57E-01 | transcription_start_site | - | 316306 | 316306 | -2140 | 25534 | AN6475 |
| 412  | CONTIG109 | 9691   | 10123  | 2.43 | 1.77E-03 | transcription_start_site | - | 9140   | 9140   | -767  | 25572 | AN6487 |
| 412  | CONTIG109 | 9691   | 10123  | 2.43 | 1.77E-03 | transcription_start_site | - | 9067   | 9067   | -840  | 25573 | AN6487 |
| 412  | CONTIG109 | 9691   | 10123  | 2.43 | 1.77E-03 | transcription_start_site | - | 8941   | 8941   | -966  | 25574 | AN6487 |
| 412  | CONTIG109 | 9691   | 10123  | 2.43 | 1.77E-03 | transcription_start_site | - | 8567   | 8567   | -1340 | 25575 | AN6487 |
| 1406 | CONTIG109 | 10446  | 11460  | 1.34 | 7.52E-03 | transcription_start_site | - | 9140   | 9140   | -1813 | 25572 | AN6487 |
| 1406 | CONTIG109 | 10446  | 11460  | 1.34 | 7.52E-03 | transcription_start_site | - | 9067   | 9067   | -1886 | 25573 | AN6487 |
| 1406 | CONTIG109 | 10446  | 11460  | 1.34 | 7.52E-03 | transcription_start_site | - | 8941   | 8941   | -2012 | 25574 | AN6487 |
| 1406 | CONTIG109 | 10446  | 11460  | 1.34 | 7.52E-03 | transcription_start_site | - | 8567   | 8567   | -2386 | 25575 | AN6487 |
| 412  | CONTIG109 | 9691   | 10123  | 2.43 | 1.77E-03 | transcription_start_site | - | 10694  | 10694  | 787   | 25580 | AN6488 |



|      |           |       |       |      |          |                          |   |       |       |       |       |        |
|------|-----------|-------|-------|------|----------|--------------------------|---|-------|-------|-------|-------|--------|
| 412  | CONTIG109 | 9691  | 10123 | 2.43 | 1.77E-03 | transcription_start_site | - | 10862 | 10862 | 955   | 25579 | AN6488 |
| 412  | CONTIG109 | 9691  | 10123 | 2.43 | 1.77E-03 | transcription_start_site | - | 11027 | 11027 | 1120  | 25578 | AN6488 |
| 1406 | CONTIG109 | 10446 | 11460 | 1.34 | 7.52E-03 | transcription_start_site | - | 11027 | 11027 | 74    | 25578 | AN6488 |
| 1406 | CONTIG109 | 10446 | 11460 | 1.34 | 7.52E-03 | transcription_start_site | - | 10862 | 10862 | -91   | 25579 | AN6488 |
| 1406 | CONTIG109 | 10446 | 11460 | 1.34 | 7.52E-03 | transcription_start_site | - | 11164 | 11164 | 211   | 25577 | AN6488 |
| 1406 | CONTIG109 | 10446 | 11460 | 1.34 | 7.52E-03 | transcription_start_site | - | 10694 | 10694 | -259  | 25580 | AN6488 |
| 1406 | CONTIG109 | 10446 | 11460 | 1.34 | 7.52E-03 | transcription_start_site | - | 11607 | 11607 | 654   | 25576 | AN6488 |
| 1406 | CONTIG109 | 10446 | 11460 | 1.34 | 7.52E-03 | transcription_start_site | - | 12140 | 12140 | 1187  | 25585 | AN6489 |
| 412  | CONTIG109 | 9691  | 10123 | 2.43 | 1.77E-03 | transcription_start_site | + | 13316 | 13316 | -3409 | 25586 | AN6490 |
| 412  | CONTIG109 | 9691  | 10123 | 2.43 | 1.77E-03 | transcription_start_site | + | 13586 | 13586 | -3679 | 25587 | AN6490 |
| 412  | CONTIG109 | 9691  | 10123 | 2.43 | 1.77E-03 | transcription_start_site | + | 13726 | 13726 | -3819 | 25588 | AN6490 |
| 412  | CONTIG109 | 9691  | 10123 | 2.43 | 1.77E-03 | transcription_start_site | + | 13863 | 13863 | -3956 | 25589 | AN6490 |
| 412  | CONTIG109 | 9691  | 10123 | 2.43 | 1.77E-03 | transcription_start_site | + | 13981 | 13981 | -4074 | 25590 | AN6490 |
| 412  | CONTIG109 | 9691  | 10123 | 2.43 | 1.77E-03 | transcription_start_site | + | 14239 | 14239 | -4332 | 25591 | AN6490 |
| 412  | CONTIG109 | 9691  | 10123 | 2.43 | 1.77E-03 | transcription_start_site | + | 14571 | 14571 | -4664 | 25592 | AN6490 |
| 1406 | CONTIG109 | 10446 | 11460 | 1.34 | 7.52E-03 | transcription_start_site | + | 13316 | 13316 | -2363 | 25586 | AN6490 |
| 1406 | CONTIG109 | 10446 | 11460 | 1.34 | 7.52E-03 | transcription_start_site | + | 13586 | 13586 | -2633 | 25587 | AN6490 |
| 1406 | CONTIG109 | 10446 | 11460 | 1.34 | 7.52E-03 | transcription_start_site | + | 13726 | 13726 | -2773 | 25588 | AN6490 |
| 1406 | CONTIG109 | 10446 | 11460 | 1.34 | 7.52E-03 | transcription_start_site | + | 13863 | 13863 | -2910 | 25589 | AN6490 |
| 1406 | CONTIG109 | 10446 | 11460 | 1.34 | 7.52E-03 | transcription_start_site | + | 13981 | 13981 | -3028 | 25590 | AN6490 |
| 1406 | CONTIG109 | 10446 | 11460 | 1.34 | 7.52E-03 | transcription_start_site | + | 14239 | 14239 | -3286 | 25591 | AN6490 |
| 1406 | CONTIG109 | 10446 | 11460 | 1.34 | 7.52E-03 | transcription_start_site | + | 14571 | 14571 | -3618 | 25592 | AN6490 |
| 1406 | CONTIG109 | 10446 | 11460 | 1.34 | 7.52E-03 | transcription_start_site | + | 16436 | 16436 | -5483 | 25596 | AN6492 |
| 475  | CONTIG109 | 35643 | 36133 | 2.35 | 2.61E-03 | transcription_start_site | - | 35143 | 35143 | -745  | 25633 | AN6499 |
| 475  | CONTIG109 | 35643 | 36133 | 2.35 | 2.61E-03 | transcription_start_site | - | 35065 | 35065 | -823  | 25634 | AN6499 |
| 475  | CONTIG109 | 35643 | 36133 | 2.35 | 2.61E-03 | transcription_start_site | - | 34970 | 34970 | -918  | 25635 | AN6499 |
| 475  | CONTIG109 | 35643 | 36133 | 2.35 | 2.61E-03 | transcription_start_site | - | 34807 | 34807 | -1081 | 25636 | AN6499 |
| 475  | CONTIG109 | 35643 | 36133 | 2.35 | 2.61E-03 | transcription_start_site | - | 34649 | 34649 | -1239 | 25637 | AN6499 |
| 475  | CONTIG109 | 35643 | 36133 | 2.35 | 2.61E-03 | transcription_start_site | - | 34213 | 34213 | -1675 | 25638 | AN6499 |
| 475  | CONTIG109 | 35643 | 36133 | 2.35 | 2.61E-03 | transcription_start_site | - | 34074 | 34074 | -1814 | 25639 | AN6499 |
| 475  | CONTIG109 | 35643 | 36133 | 2.35 | 2.61E-03 | transcription_start_site | - | 33872 | 33872 | -2016 | 25640 | AN6499 |
| 475  | CONTIG109 | 35643 | 36133 | 2.35 | 2.61E-03 | transcription_start_site | - | 36486 | 36486 | 598   | 25645 | AN6500 |
| 475  | CONTIG109 | 35643 | 36133 | 2.35 | 2.61E-03 | transcription_start_site | - | 36685 | 36685 | 797   | 25644 | AN6500 |
| 475  | CONTIG109 | 35643 | 36133 | 2.35 | 2.61E-03 | transcription_start_site | - | 36774 | 36774 | 886   | 25643 | AN6500 |
| 475  | CONTIG109 | 35643 | 36133 | 2.35 | 2.61E-03 | transcription_start_site | - | 36941 | 36941 | 1053  | 25642 | AN6500 |
| 475  | CONTIG109 | 35643 | 36133 | 2.35 | 2.61E-03 | transcription_start_site | - | 37086 | 37086 | 1198  | 25641 | AN6500 |
| 1693 | CONTIG109 | 46726 | 47227 | 1.14 | 7.38E-02 | transcription_start_site | - | 43921 | 43921 | -3055 | 25649 | AN6503 |
| 1693 | CONTIG109 | 46726 | 47227 | 1.14 | 7.38E-02 | transcription_start_site | - | 43062 | 43062 | -3914 | 25650 | AN6503 |
| 1693 | CONTIG109 | 46726 | 47227 | 1.14 | 7.38E-02 | transcription_start_site | - | 42945 | 42945 | -4031 | 25651 | AN6503 |
| 1693 | CONTIG109 | 46726 | 47227 | 1.14 | 7.38E-02 | transcription_start_site | - | 42709 | 42709 | -4267 | 25652 | AN6503 |
| 1693 | CONTIG109 | 46726 | 47227 | 1.14 | 7.38E-02 | transcription_start_site | + | 47928 | 47928 | -951  | 25653 | AN6504 |
| 1693 | CONTIG109 | 46726 | 47227 | 1.14 | 7.38E-02 | transcription_start_site | + | 48293 | 48293 | -1316 | 25654 | AN6504 |
| 1693 | CONTIG109 | 46726 | 47227 | 1.14 | 7.38E-02 | transcription_start_site | + | 48637 | 48637 | -1660 | 25655 | AN6504 |
| 1693 | CONTIG109 | 46726 | 47227 | 1.14 | 7.38E-02 | transcription_start_site | + | 48878 | 48878 | -1901 | 25656 | AN6504 |
| 1693 | CONTIG109 | 46726 | 47227 | 1.14 | 7.38E-02 | transcription_start_site | + | 49057 | 49057 | -2080 | 25657 | AN6504 |
| 16   | CONTIG109 | 62479 | 62908 | 3.49 | 0.00E+00 | transcription_start_site | - | 57518 | 57518 | -5175 | 25669 | AN6507 |
| 16   | CONTIG109 | 62479 | 62908 | 3.49 | 0.00E+00 | transcription_start_site | - | 60280 | 60280 | -2413 | 25676 | AN6508 |
| 16   | CONTIG109 | 62479 | 62908 | 3.49 | 0.00E+00 | transcription_start_site | - | 60146 | 60146 | -2547 | 25677 | AN6508 |
| 16   | CONTIG109 | 62479 | 62908 | 3.49 | 0.00E+00 | transcription_start_site | - | 59908 | 59908 | -2785 | 25678 | AN6508 |
| 16   | CONTIG109 | 62479 | 62908 | 3.49 | 0.00E+00 | transcription_start_site | - | 59759 | 59759 | -2934 | 25679 | AN6508 |
| 16   | CONTIG109 | 62479 | 62908 | 3.49 | 0.00E+00 | transcription_start_site | - | 59360 | 59360 | -3333 | 25680 | AN6508 |
| 16   | CONTIG109 | 62479 | 62908 | 3.49 | 0.00E+00 | transcription_start_site | - | 59106 | 59106 | -3587 | 25681 | AN6508 |
| 16   | CONTIG109 | 62479 | 62908 | 3.49 | 0.00E+00 | transcription_start_site | - | 58827 | 58827 | -3866 | 25682 | AN6508 |
| 293  | CONTIG109 | 66244 | 66728 | 2.64 | 7.06E-04 | transcription_start_site | - | 66294 | 66294 | -192  | 25686 | AN6509 |
| 293  | CONTIG109 | 66244 | 66728 | 2.64 | 7.06E-04 | transcription_start_site | - | 66724 | 66724 | 238   | 25685 | AN6509 |
| 293  | CONTIG109 | 66244 | 66728 | 2.64 | 7.06E-04 | transcription_start_site | - | 66964 | 66964 | 478   | 25684 | AN6509 |
| 293  | CONTIG109 | 66244 | 66728 | 2.64 | 7.06E-04 | transcription_start_site | - | 67105 | 67105 | 619   | 25683 | AN6509 |

|      |           |        |        |      |          |                          |   |        |        |       |       |        |
|------|-----------|--------|--------|------|----------|--------------------------|---|--------|--------|-------|-------|--------|
| 293  | CONTIG109 | 66244  | 66728  | 2.64 | 7.06E-04 | transcription_start_site | - | 67691  | 67691  | 1205  | 25689 | AN6510 |
| 1284 | CONTIG109 | 107635 | 107979 | 1.46 | 4.78E-02 | transcription_start_site | - | 104488 | 104488 | -3319 | 25724 | AN6523 |
| 1284 | CONTIG109 | 107635 | 107979 | 1.46 | 4.78E-02 | transcription_start_site | - | 107405 | 107405 | -402  | 25729 | AN6525 |
| 1284 | CONTIG109 | 107635 | 107979 | 1.46 | 4.78E-02 | transcription_start_site | - | 107249 | 107249 | -558  | 25730 | AN6525 |
| 1284 | CONTIG109 | 107635 | 107979 | 1.46 | 4.78E-02 | transcription_start_site | - | 107168 | 107168 | -639  | 25731 | AN6525 |
| 1284 | CONTIG109 | 107635 | 107979 | 1.46 | 4.78E-02 | transcription_start_site | - | 106933 | 106933 | -874  | 25732 | AN6525 |
| 1284 | CONTIG109 | 107635 | 107979 | 1.46 | 4.78E-02 | transcription_start_site | - | 106337 | 106337 | -1470 | 25733 | AN6525 |
| 1092 | CONTIG109 | 118280 | 118789 | 1.62 | 1.44E-02 | transcription_start_site | - | 115368 | 115368 | -3166 | 25737 | AN6528 |
| 1092 | CONTIG109 | 118280 | 118789 | 1.62 | 1.44E-02 | transcription_start_site | - | 115242 | 115242 | -3292 | 25738 | AN6528 |
| 1092 | CONTIG109 | 118280 | 118789 | 1.62 | 1.44E-02 | transcription_start_site | - | 115021 | 115021 | -3513 | 25739 | AN6528 |
| 1092 | CONTIG109 | 118280 | 118789 | 1.62 | 1.44E-02 | transcription_start_site | - | 114589 | 114589 | -3945 | 25740 | AN6528 |
| 1092 | CONTIG109 | 118280 | 118789 | 1.62 | 1.44E-02 | transcription_start_site | + | 117710 | 117710 | 824   | 25741 | AN6529 |
| 1092 | CONTIG109 | 118280 | 118789 | 1.62 | 1.44E-02 | transcription_start_site | + | 119636 | 119636 | -1101 | 25742 | AN6529 |
| 1092 | CONTIG109 | 118280 | 118789 | 1.62 | 1.44E-02 | transcription_start_site | + | 119899 | 119899 | -1364 | 25743 | AN6529 |
| 1092 | CONTIG109 | 118280 | 118789 | 1.62 | 1.44E-02 | transcription_start_site | + | 123145 | 123145 | -4610 | 25746 | AN6531 |
| 1092 | CONTIG109 | 118280 | 118789 | 1.62 | 1.44E-02 | transcription_start_site | + | 123332 | 123332 | -4797 | 25747 | AN6531 |
| 120  | CONTIG109 | 135761 | 136110 | 3.04 | 0.00E+00 | transcription_start_site | - | 131772 | 131772 | -4163 | 25751 | AN6533 |
| 120  | CONTIG109 | 135761 | 136110 | 3.04 | 0.00E+00 | transcription_start_site | - | 131509 | 131509 | -4426 | 25752 | AN6533 |
| 190  | CONTIG109 | 134046 | 134458 | 2.84 | 0.00E+00 | transcription_start_site | - | 131772 | 131772 | -2480 | 25751 | AN6533 |
| 190  | CONTIG109 | 134046 | 134458 | 2.84 | 0.00E+00 | transcription_start_site | - | 131509 | 131509 | -2743 | 25752 | AN6533 |
| 190  | CONTIG109 | 134046 | 134458 | 2.84 | 0.00E+00 | transcription_start_site | - | 130469 | 130469 | -3783 | 25753 | AN6533 |
| 537  | CONTIG109 | 134791 | 135434 | 2.27 | 4.01E-03 | transcription_start_site | - | 131772 | 131772 | -3340 | 25751 | AN6533 |
| 537  | CONTIG109 | 134791 | 135434 | 2.27 | 4.01E-03 | transcription_start_site | - | 131509 | 131509 | -3603 | 25752 | AN6533 |
| 537  | CONTIG109 | 134791 | 135434 | 2.27 | 4.01E-03 | transcription_start_site | - | 130469 | 130469 | -4643 | 25753 | AN6533 |
| 120  | CONTIG109 | 135761 | 136110 | 3.04 | 0.00E+00 | transcription_start_site | + | 136807 | 136807 | -871  | 25754 | AN6534 |
| 120  | CONTIG109 | 135761 | 136110 | 3.04 | 0.00E+00 | transcription_start_site | + | 137134 | 137134 | -1198 | 25755 | AN6534 |
| 120  | CONTIG109 | 135761 | 136110 | 3.04 | 0.00E+00 | transcription_start_site | + | 137342 | 137342 | -1406 | 25756 | AN6534 |
| 190  | CONTIG109 | 134046 | 134458 | 2.84 | 0.00E+00 | transcription_start_site | + | 136807 | 136807 | -2555 | 25754 | AN6534 |
| 190  | CONTIG109 | 134046 | 134458 | 2.84 | 0.00E+00 | transcription_start_site | + | 137134 | 137134 | -2882 | 25755 | AN6534 |
| 190  | CONTIG109 | 134046 | 134458 | 2.84 | 0.00E+00 | transcription_start_site | + | 137342 | 137342 | -3090 | 25756 | AN6534 |
| 537  | CONTIG109 | 134791 | 135434 | 2.27 | 4.01E-03 | transcription_start_site | + | 136807 | 136807 | -1694 | 25754 | AN6534 |
| 537  | CONTIG109 | 134791 | 135434 | 2.27 | 4.01E-03 | transcription_start_site | + | 137134 | 137134 | -2021 | 25755 | AN6534 |
| 537  | CONTIG109 | 134791 | 135434 | 2.27 | 4.01E-03 | transcription_start_site | + | 137342 | 137342 | -2229 | 25756 | AN6534 |
| 120  | CONTIG109 | 135761 | 136110 | 3.04 | 0.00E+00 | transcription_start_site | + | 138918 | 138918 | -2982 | 25757 | AN6535 |
| 120  | CONTIG109 | 135761 | 136110 | 3.04 | 0.00E+00 | transcription_start_site | + | 139317 | 139317 | -3381 | 25758 | AN6535 |
| 190  | CONTIG109 | 134046 | 134458 | 2.84 | 0.00E+00 | transcription_start_site | + | 138918 | 138918 | -4666 | 25757 | AN6535 |
| 190  | CONTIG109 | 134046 | 134458 | 2.84 | 0.00E+00 | transcription_start_site | + | 139317 | 139317 | -5065 | 25758 | AN6535 |
| 537  | CONTIG109 | 134791 | 135434 | 2.27 | 4.01E-03 | transcription_start_site | + | 138918 | 138918 | -3805 | 25757 | AN6535 |
| 537  | CONTIG109 | 134791 | 135434 | 2.27 | 4.01E-03 | transcription_start_site | + | 139317 | 139317 | -4204 | 25758 | AN6535 |
| 387  | CONTIG109 | 142670 | 143004 | 2.47 | 1.62E-03 | transcription_start_site | - | 140613 | 140613 | -2224 | 25759 | AN6536 |
| 387  | CONTIG109 | 142670 | 143004 | 2.47 | 1.62E-03 | transcription_start_site | - | 140234 | 140234 | -2603 | 25760 | AN6536 |
| 120  | CONTIG109 | 135761 | 136110 | 3.04 | 0.00E+00 | transcription_start_site | + | 140941 | 140941 | -5005 | 25761 | AN6537 |
| 387  | CONTIG109 | 142670 | 143004 | 2.47 | 1.62E-03 | transcription_start_site | + | 143660 | 143660 | -823  | 25763 | AN6538 |
| 1025 | CONTIG109 | 157206 | 157566 | 1.7  | 2.29E-02 | transcription_start_site | - | 156884 | 156884 | -502  | 25773 | AN6542 |
| 1025 | CONTIG109 | 157206 | 157566 | 1.7  | 2.29E-02 | transcription_start_site | - | 156765 | 156765 | -621  | 25774 | AN6542 |
| 1025 | CONTIG109 | 157206 | 157566 | 1.7  | 2.29E-02 | transcription_start_site | - | 156500 | 156500 | -886  | 25775 | AN6542 |
| 1025 | CONTIG109 | 157206 | 157566 | 1.7  | 2.29E-02 | transcription_start_site | - | 156249 | 156249 | -1137 | 25776 | AN6542 |
| 1025 | CONTIG109 | 157206 | 157566 | 1.7  | 2.29E-02 | transcription_start_site | - | 156158 | 156158 | -1228 | 25777 | AN6542 |
| 1025 | CONTIG109 | 157206 | 157566 | 1.7  | 2.29E-02 | transcription_start_site | - | 155329 | 155329 | -2057 | 25778 | AN6542 |
| 1898 | CONTIG109 | 160355 | 160704 | 1.01 | 1.76E-01 | transcription_start_site | - | 156884 | 156884 | -3645 | 25773 | AN6542 |
| 1898 | CONTIG109 | 160355 | 160704 | 1.01 | 1.76E-01 | transcription_start_site | - | 156765 | 156765 | -3764 | 25774 | AN6542 |
| 1898 | CONTIG109 | 160355 | 160704 | 1.01 | 1.76E-01 | transcription_start_site | - | 156500 | 156500 | -4029 | 25775 | AN6542 |
| 1898 | CONTIG109 | 160355 | 160704 | 1.01 | 1.76E-01 | transcription_start_site | - | 156249 | 156249 | -4280 | 25776 | AN6542 |
| 1898 | CONTIG109 | 160355 | 160704 | 1.01 | 1.76E-01 | transcription_start_site | - | 156158 | 156158 | -4371 | 25777 | AN6542 |
| 1025 | CONTIG109 | 157206 | 157566 | 1.7  | 2.29E-02 | transcription_start_site | + | 158364 | 158364 | -978  | 25779 | AN6543 |
| 1898 | CONTIG109 | 160355 | 160704 | 1.01 | 1.76E-01 | transcription_start_site | - | 160332 | 160332 | -197  | 25780 | AN6544 |
| 1898 | CONTIG109 | 160355 | 160704 | 1.01 | 1.76E-01 | transcription_start_site | - | 160154 | 160154 | -375  | 25781 | AN6544 |

|      |           |        |        |      |          |                          |   |        |        |       |       |        |
|------|-----------|--------|--------|------|----------|--------------------------|---|--------|--------|-------|-------|--------|
| 1898 | CONTIG109 | 160355 | 160704 | 1.01 | 1.76E-01 | transcription_start_site | - | 159808 | 159808 | -721  | 25782 | AN6544 |
| 1898 | CONTIG109 | 160355 | 160704 | 1.01 | 1.76E-01 | transcription_start_site | - | 159664 | 159664 | -865  | 25783 | AN6544 |
| 1898 | CONTIG109 | 160355 | 160704 | 1.01 | 1.76E-01 | transcription_start_site | + | 163681 | 163681 | -3151 | 25789 | AN6547 |
| 1898 | CONTIG109 | 160355 | 160704 | 1.01 | 1.76E-01 | transcription_start_site | + | 163777 | 163777 | -3247 | 25790 | AN6547 |
| 1898 | CONTIG109 | 160355 | 160704 | 1.01 | 1.76E-01 | transcription_start_site | + | 163966 | 163966 | -3436 | 25791 | AN6547 |
| 719  | CONTIG109 | 170267 | 170547 | 2.03 | 9.32E-03 | transcription_start_site | - | 165691 | 165691 | -4716 | 25792 | AN6548 |
| 719  | CONTIG109 | 170267 | 170547 | 2.03 | 9.32E-03 | transcription_start_site | - | 165490 | 165490 | -4917 | 25793 | AN6548 |
| 719  | CONTIG109 | 170267 | 170547 | 2.03 | 9.32E-03 | transcription_start_site | - | 167136 | 167136 | -3271 | 25794 | AN6549 |
| 719  | CONTIG109 | 170267 | 170547 | 2.03 | 9.32E-03 | transcription_start_site | - | 166975 | 166975 | -3432 | 25795 | AN6549 |
| 719  | CONTIG109 | 170267 | 170547 | 2.03 | 9.32E-03 | transcription_start_site | - | 170070 | 170070 | -337  | 25796 | AN6550 |
| 719  | CONTIG109 | 170267 | 170547 | 2.03 | 9.32E-03 | transcription_start_site | - | 170659 | 170659 | 252   | 25804 | AN6551 |
| 938  | CONTIG109 | 176937 | 177278 | 1.78 | 7.36E-03 | transcription_start_site | - | 176191 | 176191 | -916  | 25797 | AN6551 |
| 938  | CONTIG109 | 176937 | 177278 | 1.78 | 7.36E-03 | transcription_start_site | - | 175998 | 175998 | -1109 | 25798 | AN6551 |
| 938  | CONTIG109 | 176937 | 177278 | 1.78 | 7.36E-03 | transcription_start_site | - | 175893 | 175893 | -1214 | 25799 | AN6551 |
| 938  | CONTIG109 | 176937 | 177278 | 1.78 | 7.36E-03 | transcription_start_site | - | 175620 | 175620 | -1487 | 25800 | AN6551 |
| 938  | CONTIG109 | 176937 | 177278 | 1.78 | 7.36E-03 | transcription_start_site | - | 172247 | 172247 | -4860 | 25801 | AN6551 |
| 938  | CONTIG109 | 176937 | 177278 | 1.78 | 7.36E-03 | transcription_start_site | - | 172158 | 172158 | -4949 | 25802 | AN6551 |
| 938  | CONTIG109 | 176937 | 177278 | 1.78 | 7.36E-03 | transcription_start_site | + | 178658 | 178658 | -1550 | 25805 | AN6552 |
| 938  | CONTIG109 | 176937 | 177278 | 1.78 | 7.36E-03 | transcription_start_site | + | 180576 | 180576 | -3468 | 25806 | AN6553 |
| 938  | CONTIG109 | 176937 | 177278 | 1.78 | 7.36E-03 | transcription_start_site | + | 181465 | 181465 | -4357 | 25807 | AN6553 |
| 938  | CONTIG109 | 176937 | 177278 | 1.78 | 7.36E-03 | transcription_start_site | + | 181704 | 181704 | -4596 | 25808 | AN6553 |
| 938  | CONTIG109 | 176937 | 177278 | 1.78 | 7.36E-03 | transcription_start_site | + | 181866 | 181866 | -4758 | 25809 | AN6553 |
| 1777 | CONTIG109 | 193970 | 195959 | 1.09 | 1.38E-01 | transcription_start_site | - | 190632 | 190632 | -4332 | 25829 | AN6558 |
| 1777 | CONTIG109 | 193970 | 195959 | 1.09 | 1.38E-01 | transcription_start_site | - | 190422 | 190422 | -4542 | 25830 | AN6558 |
| 1777 | CONTIG109 | 193970 | 195959 | 1.09 | 1.38E-01 | transcription_start_site | - | 190208 | 190208 | -4756 | 25831 | AN6558 |
| 1777 | CONTIG109 | 193970 | 195959 | 1.09 | 1.38E-01 | transcription_start_site | - | 190074 | 190074 | -4890 | 25832 | AN6558 |
| 1777 | CONTIG109 | 193970 | 195959 | 1.09 | 1.38E-01 | transcription_start_site | - | 192715 | 192715 | -2249 | 25833 | AN6559 |
| 1777 | CONTIG109 | 193970 | 195959 | 1.09 | 1.38E-01 | transcription_start_site | + | 195824 | 195824 | -859  | 25834 | AN6560 |
| 1777 | CONTIG109 | 193970 | 195959 | 1.09 | 1.38E-01 | transcription_start_site | + | 196075 | 196075 | -1110 | 25835 | AN6560 |
| 1777 | CONTIG109 | 193970 | 195959 | 1.09 | 1.38E-01 | transcription_start_site | + | 199604 | 199604 | -4639 | 25838 | AN6562 |
| 1778 | CONTIG109 | 217505 | 217794 | 1.09 | 1.38E-01 | transcription_start_site | - | 212763 | 212763 | -4886 | 25848 | AN6566 |
| 1778 | CONTIG109 | 217505 | 217794 | 1.09 | 1.38E-01 | transcription_start_site | - | 212642 | 212642 | -5007 | 25849 | AN6566 |
| 1778 | CONTIG109 | 217505 | 217794 | 1.09 | 1.38E-01 | transcription_start_site | - | 212537 | 212537 | -5112 | 25850 | AN6566 |
| 1695 | CONTIG109 | 221863 | 222202 | 1.14 | 1.22E-01 | transcription_start_site | - | 217388 | 217388 | -4644 | 25857 | AN6568 |
| 1695 | CONTIG109 | 221863 | 222202 | 1.14 | 1.22E-01 | transcription_start_site | - | 217115 | 217115 | -4917 | 25858 | AN6568 |
| 1778 | CONTIG109 | 217505 | 217794 | 1.09 | 1.38E-01 | transcription_start_site | - | 217388 | 217388 | -261  | 25857 | AN6568 |
| 1778 | CONTIG109 | 217505 | 217794 | 1.09 | 1.38E-01 | transcription_start_site | - | 217115 | 217115 | -534  | 25858 | AN6568 |
| 1778 | CONTIG109 | 217505 | 217794 | 1.09 | 1.38E-01 | transcription_start_site | - | 216453 | 216453 | -1196 | 25859 | AN6568 |
| 1778 | CONTIG109 | 217505 | 217794 | 1.09 | 1.38E-01 | transcription_start_site | - | 216165 | 216165 | -1484 | 25860 | AN6568 |
| 1778 | CONTIG109 | 217505 | 217794 | 1.09 | 1.38E-01 | transcription_start_site | + | 217849 | 217849 | -199  | 25861 | AN6569 |
| 1778 | CONTIG109 | 217505 | 217794 | 1.09 | 1.38E-01 | transcription_start_site | + | 218267 | 218267 | -617  | 25862 | AN6569 |
| 1695 | CONTIG109 | 221863 | 222202 | 1.14 | 1.22E-01 | transcription_start_site | - | 221148 | 221148 | -884  | 25863 | AN6570 |
| 1695 | CONTIG109 | 221863 | 222202 | 1.14 | 1.22E-01 | transcription_start_site | - | 220310 | 220310 | -1722 | 25864 | AN6570 |
| 1695 | CONTIG109 | 221863 | 222202 | 1.14 | 1.22E-01 | transcription_start_site | + | 223193 | 223193 | -1160 | 25865 | AN6571 |
| 1695 | CONTIG109 | 221863 | 222202 | 1.14 | 1.22E-01 | transcription_start_site | + | 224771 | 224771 | -2738 | 25866 | AN6571 |
| 130  | CONTIG110 | 11116  | 11398  | 3.01 | 0.00E+00 | transcription_start_site | + | 13248  | 13248  | -1991 | 25885 | AN6578 |
| 403  | CONTIG110 | 7216   | 8376   | 2.44 | 0.00E+00 | transcription_start_site | + | 13248  | 13248  | -5452 | 25885 | AN6578 |
| 654  | CONTIG110 | 12244  | 12803  | 2.1  | 4.01E-03 | transcription_start_site | + | 13248  | 13248  | -724  | 25885 | AN6578 |
| 673  | CONTIG110 | 8626   | 9446   | 2.07 | 0.00E+00 | transcription_start_site | + | 13248  | 13248  | -4212 | 25885 | AN6578 |
| 405  | CONTIG110 | 22069  | 22329  | 2.44 | 7.06E-04 | transcription_start_site | - | 18275  | 18275  | -3924 | 25886 | AN6579 |
| 405  | CONTIG110 | 22069  | 22329  | 2.44 | 7.06E-04 | transcription_start_site | - | 17232  | 17232  | -4967 | 25887 | AN6579 |
| 405  | CONTIG110 | 22069  | 22329  | 2.44 | 7.06E-04 | transcription_start_site | + | 22765  | 22765  | -566  | 25892 | AN6581 |
| 1709 | CONTIG110 | 44552  | 45066  | 1.13 | 5.49E-02 | transcription_start_site | - | 39625  | 39625  | -5184 | 25909 | AN6586 |
| 1709 | CONTIG110 | 44552  | 45066  | 1.13 | 5.49E-02 | transcription_start_site | - | 43340  | 43340  | -1469 | 25912 | AN6587 |
| 1709 | CONTIG110 | 44552  | 45066  | 1.13 | 5.49E-02 | transcription_start_site | - | 43163  | 43163  | -1646 | 25913 | AN6587 |
| 1709 | CONTIG110 | 44552  | 45066  | 1.13 | 5.49E-02 | transcription_start_site | - | 41857  | 41857  | -2952 | 25914 | AN6587 |
| 1709 | CONTIG110 | 44552  | 45066  | 1.13 | 5.49E-02 | transcription_start_site | - | 41528  | 41528  | -3281 | 25915 | AN6587 |

|      |           |        |        |      |          |                          |   |        |        |       |       |        |
|------|-----------|--------|--------|------|----------|--------------------------|---|--------|--------|-------|-------|--------|
| 1709 | CONTIG110 | 44552  | 45066  | 1.13 | 5.49E-02 | transcription_start_site | - | 40918  | 40918  | -3891 | 25916 | AN6587 |
| 887  | CONTIG110 | 76746  | 77095  | 1.84 | 3.78E-03 | transcription_start_site | + | 77284  | 77284  | -363  | 25938 | AN6597 |
| 887  | CONTIG110 | 76746  | 77095  | 1.84 | 3.78E-03 | transcription_start_site | + | 78528  | 78528  | -1607 | 25939 | AN6597 |
| 1841 | CONTIG110 | 115971 | 116381 | 1.05 | 1.22E-01 | transcription_start_site | - | 112343 | 112343 | -3833 | 25981 | AN6609 |
| 1841 | CONTIG110 | 115971 | 116381 | 1.05 | 1.22E-01 | transcription_start_site | + | 116436 | 116436 | -260  | 25988 | AN6611 |
| 1841 | CONTIG110 | 115971 | 116381 | 1.05 | 1.22E-01 | transcription_start_site | + | 118546 | 118546 | -2370 | 25989 | AN6611 |
| 1841 | CONTIG110 | 115971 | 116381 | 1.05 | 1.22E-01 | transcription_start_site | + | 118608 | 118608 | -2432 | 25990 | AN6611 |
| 1841 | CONTIG110 | 115971 | 116381 | 1.05 | 1.22E-01 | transcription_start_site | + | 118823 | 118823 | -2647 | 25991 | AN6611 |
| 1841 | CONTIG110 | 115971 | 116381 | 1.05 | 1.22E-01 | transcription_start_site | + | 119001 | 119001 | -2825 | 25992 | AN6611 |
| 1841 | CONTIG110 | 115971 | 116381 | 1.05 | 1.22E-01 | transcription_start_site | + | 120096 | 120096 | -3920 | 25993 | AN6612 |
| 1841 | CONTIG110 | 115971 | 116381 | 1.05 | 1.22E-01 | transcription_start_site | + | 120258 | 120258 | -4082 | 25994 | AN6612 |
| 846  | CONTIG110 | 183302 | 183726 | 1.88 | 9.32E-03 | transcription_start_site | - | 183068 | 183068 | -446  | 26057 | AN6633 |
| 846  | CONTIG110 | 183302 | 183726 | 1.88 | 9.32E-03 | transcription_start_site | - | 182979 | 182979 | -535  | 26058 | AN6633 |
| 846  | CONTIG110 | 183302 | 183726 | 1.88 | 9.32E-03 | transcription_start_site | + | 183911 | 183911 | -397  | 26059 | AN6634 |
| 846  | CONTIG110 | 183302 | 183726 | 1.88 | 9.32E-03 | transcription_start_site | + | 184647 | 184647 | -1133 | 26060 | AN6634 |
| 846  | CONTIG110 | 183302 | 183726 | 1.88 | 9.32E-03 | transcription_start_site | + | 185693 | 185693 | -2179 | 26061 | AN6635 |
| 846  | CONTIG110 | 183302 | 183726 | 1.88 | 9.32E-03 | transcription_start_site | + | 185942 | 185942 | -2428 | 26062 | AN6635 |
| 846  | CONTIG110 | 183302 | 183726 | 1.88 | 9.32E-03 | transcription_start_site | + | 186069 | 186069 | -2555 | 26063 | AN6635 |
| 846  | CONTIG110 | 183302 | 183726 | 1.88 | 9.32E-03 | transcription_start_site | + | 186315 | 186315 | -2801 | 26064 | AN6635 |
| 846  | CONTIG110 | 183302 | 183726 | 1.88 | 9.32E-03 | transcription_start_site | + | 186539 | 186539 | -3025 | 26065 | AN6635 |
| 846  | CONTIG110 | 183302 | 183726 | 1.88 | 9.32E-03 | transcription_start_site | + | 186730 | 186730 | -3216 | 26066 | AN6635 |
| 604  | CONTIG110 | 206418 | 206768 | 2.18 | 2.61E-03 | transcription_start_site | - | 201951 | 201951 | -4642 | 26076 | AN6640 |
| 604  | CONTIG110 | 206418 | 206768 | 2.18 | 2.61E-03 | transcription_start_site | - | 201799 | 201799 | -4794 | 26077 | AN6640 |
| 321  | CONTIG110 | 208213 | 208867 | 2.59 | 2.51E-04 | transcription_start_site | + | 208898 | 208898 | -358  | 26086 | AN6642 |
| 321  | CONTIG110 | 208213 | 208867 | 2.59 | 2.51E-04 | transcription_start_site | + | 209192 | 209192 | -652  | 26087 | AN6642 |
| 321  | CONTIG110 | 208213 | 208867 | 2.59 | 2.51E-04 | transcription_start_site | + | 209505 | 209505 | -965  | 26088 | AN6642 |
| 321  | CONTIG110 | 208213 | 208867 | 2.59 | 2.51E-04 | transcription_start_site | + | 211625 | 211625 | -3085 | 26089 | AN6642 |
| 604  | CONTIG110 | 206418 | 206768 | 2.18 | 2.61E-03 | transcription_start_site | + | 208898 | 208898 | -2305 | 26086 | AN6642 |
| 604  | CONTIG110 | 206418 | 206768 | 2.18 | 2.61E-03 | transcription_start_site | + | 209192 | 209192 | -2599 | 26087 | AN6642 |
| 604  | CONTIG110 | 206418 | 206768 | 2.18 | 2.61E-03 | transcription_start_site | + | 209505 | 209505 | -2912 | 26088 | AN6642 |
| 604  | CONTIG110 | 206418 | 206768 | 2.18 | 2.61E-03 | transcription_start_site | + | 211625 | 211625 | -5032 | 26089 | AN6642 |
| 847  | CONTIG110 | 207453 | 208027 | 1.88 | 9.32E-03 | transcription_start_site | + | 208898 | 208898 | -1158 | 26086 | AN6642 |
| 847  | CONTIG110 | 207453 | 208027 | 1.88 | 9.32E-03 | transcription_start_site | + | 209192 | 209192 | -1452 | 26087 | AN6642 |
| 847  | CONTIG110 | 207453 | 208027 | 1.88 | 9.32E-03 | transcription_start_site | + | 209505 | 209505 | -1765 | 26088 | AN6642 |
| 847  | CONTIG110 | 207453 | 208027 | 1.88 | 9.32E-03 | transcription_start_site | + | 211625 | 211625 | -3885 | 26089 | AN6642 |
| 1842 | CONTIG110 | 214818 | 215232 | 1.05 | 1.22E-01 | transcription_start_site | - | 214441 | 214441 | -584  | 26090 | AN6643 |
| 1842 | CONTIG110 | 214818 | 215232 | 1.05 | 1.22E-01 | transcription_start_site | - | 214134 | 214134 | -891  | 26091 | AN6643 |
| 2010 | CONTIG110 | 215558 | 215992 | 0.94 | 1.76E-01 | transcription_start_site | - | 214441 | 214441 | -1334 | 26090 | AN6643 |
| 2010 | CONTIG110 | 215558 | 215992 | 0.94 | 1.76E-01 | transcription_start_site | - | 214134 | 214134 | -1641 | 26091 | AN6643 |
| 1842 | CONTIG110 | 214818 | 215232 | 1.05 | 1.22E-01 | transcription_start_site | - | 215527 | 215527 | 502   | 26096 | AN6644 |
| 1842 | CONTIG110 | 214818 | 215232 | 1.05 | 1.22E-01 | transcription_start_site | - | 216177 | 216177 | 1152  | 26095 | AN6644 |
| 2010 | CONTIG110 | 215558 | 215992 | 0.94 | 1.76E-01 | transcription_start_site | - | 215527 | 215527 | -248  | 26096 | AN6644 |
| 2010 | CONTIG110 | 215558 | 215992 | 0.94 | 1.76E-01 | transcription_start_site | - | 216177 | 216177 | 402   | 26095 | AN6644 |
| 1842 | CONTIG110 | 214818 | 215232 | 1.05 | 1.22E-01 | transcription_start_site | + | 218657 | 218657 | -3632 | 26097 | AN6645 |
| 1842 | CONTIG110 | 214818 | 215232 | 1.05 | 1.22E-01 | transcription_start_site | + | 219475 | 219475 | -4450 | 26098 | AN6645 |
| 2010 | CONTIG110 | 215558 | 215992 | 0.94 | 1.76E-01 | transcription_start_site | + | 218657 | 218657 | -2882 | 26097 | AN6645 |
| 2010 | CONTIG110 | 215558 | 215992 | 0.94 | 1.76E-01 | transcription_start_site | + | 219475 | 219475 | -3700 | 26098 | AN6645 |
| 1773 | CONTIG110 | 232521 | 233095 | 1.09 | 1.08E-01 | transcription_start_site | - | 227717 | 227717 | -5091 | 26102 | AN6648 |
| 1773 | CONTIG110 | 232521 | 233095 | 1.09 | 1.08E-01 | transcription_start_site | - | 232321 | 232321 | -487  | 26110 | AN6650 |
| 1773 | CONTIG110 | 232521 | 233095 | 1.09 | 1.08E-01 | transcription_start_site | - | 232178 | 232178 | -630  | 26111 | AN6650 |
| 1773 | CONTIG110 | 232521 | 233095 | 1.09 | 1.08E-01 | transcription_start_site | - | 230995 | 230995 | -1813 | 26112 | AN6650 |
| 1773 | CONTIG110 | 232521 | 233095 | 1.09 | 1.08E-01 | transcription_start_site | + | 233393 | 233393 | -585  | 26113 | AN6651 |
| 1773 | CONTIG110 | 232521 | 233095 | 1.09 | 1.08E-01 | transcription_start_site | + | 235506 | 235506 | -2698 | 26114 | AN6651 |
| 1773 | CONTIG110 | 232521 | 233095 | 1.09 | 1.08E-01 | transcription_start_site | + | 236132 | 236132 | -3324 | 26115 | AN6651 |
| 1773 | CONTIG110 | 232521 | 233095 | 1.09 | 1.08E-01 | transcription_start_site | + | 237428 | 237428 | -4620 | 26116 | AN6652 |
| 1773 | CONTIG110 | 232521 | 233095 | 1.09 | 1.08E-01 | transcription_start_site | + | 237949 | 237949 | -5141 | 26117 | AN6652 |
| 715  | CONTIG110 | 242854 | 243667 | 2.03 | 0.00E+00 | transcription_start_site | - | 242721 | 242721 | -539  | 26119 | AN6653 |

|      |           |        |        |      |          |                          |   |        |        |       |       |        |
|------|-----------|--------|--------|------|----------|--------------------------|---|--------|--------|-------|-------|--------|
| 715  | CONTIG110 | 242854 | 243667 | 2.03 | 0.00E+00 | transcription_start_site | - | 242306 | 242306 | -954  | 26120 | AN6653 |
| 715  | CONTIG110 | 242854 | 243667 | 2.03 | 0.00E+00 | transcription_start_site | - | 241835 | 241835 | -1425 | 26121 | AN6653 |
| 715  | CONTIG110 | 242854 | 243667 | 2.03 | 0.00E+00 | transcription_start_site | - | 241586 | 241586 | -1674 | 26122 | AN6653 |
| 715  | CONTIG110 | 242854 | 243667 | 2.03 | 0.00E+00 | transcription_start_site | - | 241178 | 241178 | -2082 | 26123 | AN6653 |
| 715  | CONTIG110 | 242854 | 243667 | 2.03 | 0.00E+00 | transcription_start_site | - | 243814 | 243814 | 553   | 26128 | AN6654 |
| 715  | CONTIG110 | 242854 | 243667 | 2.03 | 0.00E+00 | transcription_start_site | - | 244554 | 244554 | 1293  | 26127 | AN6654 |
| 715  | CONTIG110 | 242854 | 243667 | 2.03 | 0.00E+00 | transcription_start_site | - | 244654 | 244654 | 1393  | 26126 | AN6654 |
| 948  | CONTIG110 | 249835 | 250179 | 1.77 | 1.25E-02 | transcription_start_site | - | 245419 | 245419 | -4588 | 26124 | AN6654 |
| 948  | CONTIG110 | 249835 | 250179 | 1.77 | 1.25E-02 | transcription_start_site | - | 244941 | 244941 | -5066 | 26125 | AN6654 |
| 715  | CONTIG110 | 242854 | 243667 | 2.03 | 0.00E+00 | transcription_start_site | + | 245924 | 245924 | -2663 | 26129 | AN6655 |
| 715  | CONTIG110 | 242854 | 243667 | 2.03 | 0.00E+00 | transcription_start_site | + | 246050 | 246050 | -2789 | 26130 | AN6655 |
| 715  | CONTIG110 | 242854 | 243667 | 2.03 | 0.00E+00 | transcription_start_site | + | 246643 | 246643 | -3382 | 26131 | AN6655 |
| 715  | CONTIG110 | 242854 | 243667 | 2.03 | 0.00E+00 | transcription_start_site | + | 246877 | 246877 | -3616 | 26132 | AN6655 |
| 948  | CONTIG110 | 249835 | 250179 | 1.77 | 1.25E-02 | transcription_start_site | - | 248733 | 248733 | -1274 | 26133 | AN6656 |
| 948  | CONTIG110 | 249835 | 250179 | 1.77 | 1.25E-02 | transcription_start_site | - | 248008 | 248008 | -1999 | 26134 | AN6656 |
| 948  | CONTIG110 | 249835 | 250179 | 1.77 | 1.25E-02 | transcription_start_site | - | 247779 | 247779 | -2228 | 26135 | AN6656 |
| 1030 | CONTIG110 | 253520 | 253794 | 1.69 | 1.54E-02 | transcription_start_site | - | 248733 | 248733 | -4924 | 26133 | AN6656 |
| 948  | CONTIG110 | 249835 | 250179 | 1.77 | 1.25E-02 | transcription_start_site | + | 250142 | 250142 | -135  | 26136 | AN6657 |
| 948  | CONTIG110 | 249835 | 250179 | 1.77 | 1.25E-02 | transcription_start_site | + | 250280 | 250280 | -273  | 26137 | AN6657 |
| 948  | CONTIG110 | 249835 | 250179 | 1.77 | 1.25E-02 | transcription_start_site | + | 251334 | 251334 | -1327 | 26138 | AN6658 |
| 948  | CONTIG110 | 249835 | 250179 | 1.77 | 1.25E-02 | transcription_start_site | + | 251507 | 251507 | -1500 | 26139 | AN6658 |
| 948  | CONTIG110 | 249835 | 250179 | 1.77 | 1.25E-02 | transcription_start_site | + | 251583 | 251583 | -1576 | 26140 | AN6658 |
| 948  | CONTIG110 | 249835 | 250179 | 1.77 | 1.25E-02 | transcription_start_site | + | 251756 | 251756 | -1749 | 26141 | AN6658 |
| 948  | CONTIG110 | 249835 | 250179 | 1.77 | 1.25E-02 | transcription_start_site | + | 252157 | 252157 | -2150 | 26142 | AN6658 |
| 1310 | CONTIG110 | 268651 | 269090 | 1.43 | 3.70E-02 | transcription_start_site | - | 263898 | 263898 | -4972 | 26148 | AN6661 |
| 1310 | CONTIG110 | 268651 | 269090 | 1.43 | 3.70E-02 | transcription_start_site | + | 270689 | 270689 | -1818 | 26153 | AN6663 |
| 1310 | CONTIG110 | 268651 | 269090 | 1.43 | 3.70E-02 | transcription_start_site | + | 270843 | 270843 | -1972 | 26154 | AN6663 |
| 1310 | CONTIG110 | 268651 | 269090 | 1.43 | 3.70E-02 | transcription_start_site | + | 271709 | 271709 | -2838 | 26155 | AN6663 |
| 1232 | CONTIG110 | 273616 | 273888 | 1.5  | 3.01E-02 | transcription_start_site | + | 275211 | 275211 | -1459 | 26156 | AN6664 |
| 1232 | CONTIG110 | 273616 | 273888 | 1.5  | 3.01E-02 | transcription_start_site | + | 275486 | 275486 | -1734 | 26157 | AN6664 |
| 1232 | CONTIG110 | 273616 | 273888 | 1.5  | 3.01E-02 | transcription_start_site | + | 275877 | 275877 | -2125 | 26158 | AN6664 |
| 1232 | CONTIG110 | 273616 | 273888 | 1.5  | 3.01E-02 | transcription_start_site | + | 278839 | 278839 | -5087 | 26159 | AN6665 |
| 142  | CONTIG110 | 288676 | 289045 | 2.97 | 0.00E+00 | transcription_start_site | - | 285281 | 285281 | -3579 | 26166 | AN6668 |
| 142  | CONTIG110 | 288676 | 289045 | 2.97 | 0.00E+00 | transcription_start_site | - | 285175 | 285175 | -3685 | 26167 | AN6668 |
| 142  | CONTIG110 | 288676 | 289045 | 2.97 | 0.00E+00 | transcription_start_site | - | 285049 | 285049 | -3811 | 26168 | AN6668 |
| 142  | CONTIG110 | 288676 | 289045 | 2.97 | 0.00E+00 | transcription_start_site | - | 284743 | 284743 | -4117 | 26169 | AN6668 |
| 683  | CONTIG110 | 289510 | 289859 | 2.07 | 4.57E-03 | transcription_start_site | - | 285281 | 285281 | -4403 | 26166 | AN6668 |
| 683  | CONTIG110 | 289510 | 289859 | 2.07 | 4.57E-03 | transcription_start_site | - | 285175 | 285175 | -4509 | 26167 | AN6668 |
| 683  | CONTIG110 | 289510 | 289859 | 2.07 | 4.57E-03 | transcription_start_site | - | 285049 | 285049 | -4635 | 26168 | AN6668 |
| 683  | CONTIG110 | 289510 | 289859 | 2.07 | 4.57E-03 | transcription_start_site | - | 284743 | 284743 | -4941 | 26169 | AN6668 |
| 142  | CONTIG110 | 288676 | 289045 | 2.97 | 0.00E+00 | transcription_start_site | - | 287716 | 287716 | -1144 | 26170 | AN6669 |
| 142  | CONTIG110 | 288676 | 289045 | 2.97 | 0.00E+00 | transcription_start_site | - | 287463 | 287463 | -1397 | 26171 | AN6669 |
| 142  | CONTIG110 | 288676 | 289045 | 2.97 | 0.00E+00 | transcription_start_site | - | 286664 | 286664 | -2196 | 26172 | AN6669 |
| 142  | CONTIG110 | 288676 | 289045 | 2.97 | 0.00E+00 | transcription_start_site | - | 286563 | 286563 | -2297 | 26173 | AN6669 |
| 683  | CONTIG110 | 289510 | 289859 | 2.07 | 4.57E-03 | transcription_start_site | - | 287716 | 287716 | -1968 | 26170 | AN6669 |
| 683  | CONTIG110 | 289510 | 289859 | 2.07 | 4.57E-03 | transcription_start_site | - | 287463 | 287463 | -2221 | 26171 | AN6669 |
| 683  | CONTIG110 | 289510 | 289859 | 2.07 | 4.57E-03 | transcription_start_site | - | 286664 | 286664 | -3020 | 26172 | AN6669 |
| 683  | CONTIG110 | 289510 | 289859 | 2.07 | 4.57E-03 | transcription_start_site | - | 286563 | 286563 | -3121 | 26173 | AN6669 |
| 1999 | CONTIG111 | 14940  | 15439  | 0.94 | 4.73E-02 | transcription_start_site | - | 10908  | 10908  | -4281 | 26186 | AN6674 |
| 1999 | CONTIG111 | 14940  | 15439  | 0.94 | 4.73E-02 | transcription_start_site | - | 10819  | 10819  | -4370 | 26187 | AN6674 |
| 1999 | CONTIG111 | 14940  | 15439  | 0.94 | 4.73E-02 | transcription_start_site | - | 10463  | 10463  | -4726 | 26188 | AN6674 |
| 1999 | CONTIG111 | 14940  | 15439  | 0.94 | 4.73E-02 | transcription_start_site | - | 10329  | 10329  | -4860 | 26189 | AN6674 |
| 1999 | CONTIG111 | 14940  | 15439  | 0.94 | 4.73E-02 | transcription_start_site | + | 15577  | 15577  | -387  | 26192 | AN6676 |
| 1999 | CONTIG111 | 14940  | 15439  | 0.94 | 4.73E-02 | transcription_start_site | + | 15680  | 15680  | -490  | 26193 | AN6676 |
| 1999 | CONTIG111 | 14940  | 15439  | 0.94 | 4.73E-02 | transcription_start_site | + | 15846  | 15846  | -656  | 26194 | AN6676 |
| 1999 | CONTIG111 | 14940  | 15439  | 0.94 | 4.73E-02 | transcription_start_site | + | 16243  | 16243  | -1053 | 26195 | AN6676 |
| 1999 | CONTIG111 | 14940  | 15439  | 0.94 | 4.73E-02 | transcription_start_site | + | 19455  | 19455  | -4265 | 26199 | AN6678 |

|      |           |       |       |      |          |                          |   |       |       |       |       |        |
|------|-----------|-------|-------|------|----------|--------------------------|---|-------|-------|-------|-------|--------|
| 1999 | CONTIG111 | 14940 | 15439 | 0.94 | 4.73E-02 | transcription_start_site | + | 20032 | 20032 | -4842 | 26200 | AN6678 |
| 1319 | CONTIG111 | 27768 | 28267 | 1.42 | 1.25E-02 | transcription_start_site | - | 23346 | 23346 | -4671 | 26203 | AN6679 |
| 1319 | CONTIG111 | 27768 | 28267 | 1.42 | 1.25E-02 | transcription_start_site | - | 23087 | 23087 | -4930 | 26204 | AN6679 |
| 1633 | CONTIG111 | 26713 | 27219 | 1.18 | 3.34E-02 | transcription_start_site | - | 23346 | 23346 | -3620 | 26203 | AN6679 |
| 1633 | CONTIG111 | 26713 | 27219 | 1.18 | 3.34E-02 | transcription_start_site | - | 23087 | 23087 | -3879 | 26204 | AN6679 |
| 1633 | CONTIG111 | 26713 | 27219 | 1.18 | 3.34E-02 | transcription_start_site | - | 22726 | 22726 | -4240 | 26205 | AN6679 |
| 1633 | CONTIG111 | 26713 | 27219 | 1.18 | 3.34E-02 | transcription_start_site | - | 22625 | 22625 | -4341 | 26206 | AN6679 |
| 1319 | CONTIG111 | 27768 | 28267 | 1.42 | 1.25E-02 | transcription_start_site | + | 28848 | 28848 | -830  | 26207 | AN6680 |
| 1319 | CONTIG111 | 27768 | 28267 | 1.42 | 1.25E-02 | transcription_start_site | + | 28980 | 28980 | -962  | 26208 | AN6680 |
| 1319 | CONTIG111 | 27768 | 28267 | 1.42 | 1.25E-02 | transcription_start_site | + | 29117 | 29117 | -1099 | 26209 | AN6680 |
| 1633 | CONTIG111 | 26713 | 27219 | 1.18 | 3.34E-02 | transcription_start_site | + | 28848 | 28848 | -1882 | 26207 | AN6680 |
| 1633 | CONTIG111 | 26713 | 27219 | 1.18 | 3.34E-02 | transcription_start_site | + | 28980 | 28980 | -2014 | 26208 | AN6680 |
| 1633 | CONTIG111 | 26713 | 27219 | 1.18 | 3.34E-02 | transcription_start_site | + | 29117 | 29117 | -2151 | 26209 | AN6680 |
| 914  | CONTIG111 | 31129 | 31403 | 1.81 | 1.77E-03 | transcription_start_site | + | 35431 | 35431 | -4165 | 26217 | AN6682 |
| 914  | CONTIG111 | 31129 | 31403 | 1.81 | 1.77E-03 | transcription_start_site | + | 35570 | 35570 | -4304 | 26218 | AN6682 |
| 914  | CONTIG111 | 31129 | 31403 | 1.81 | 1.77E-03 | transcription_start_site | + | 36379 | 36379 | -5113 | 26219 | AN6682 |
| 859  | CONTIG111 | 47779 | 48064 | 1.87 | 1.45E-03 | transcription_start_site | - | 47412 | 47412 | -509  | 26228 | AN6685 |
| 859  | CONTIG111 | 47779 | 48064 | 1.87 | 1.45E-03 | transcription_start_site | - | 46207 | 46207 | -1714 | 26229 | AN6685 |
| 859  | CONTIG111 | 47779 | 48064 | 1.87 | 1.45E-03 | transcription_start_site | - | 43904 | 43904 | -4017 | 26230 | AN6685 |
| 859  | CONTIG111 | 47779 | 48064 | 1.87 | 1.45E-03 | transcription_start_site | + | 49707 | 49707 | -1785 | 26231 | AN6686 |
| 859  | CONTIG111 | 47779 | 48064 | 1.87 | 1.45E-03 | transcription_start_site | + | 50017 | 50017 | -2095 | 26232 | AN6686 |
| 859  | CONTIG111 | 47779 | 48064 | 1.87 | 1.45E-03 | transcription_start_site | + | 51349 | 51349 | -3427 | 26233 | AN6687 |
| 859  | CONTIG111 | 47779 | 48064 | 1.87 | 1.45E-03 | transcription_start_site | + | 51403 | 51403 | -3481 | 26234 | AN6687 |
| 859  | CONTIG111 | 47779 | 48064 | 1.87 | 1.45E-03 | transcription_start_site | + | 51683 | 51683 | -3761 | 26235 | AN6687 |
| 859  | CONTIG111 | 47779 | 48064 | 1.87 | 1.45E-03 | transcription_start_site | + | 52256 | 52256 | -4334 | 26236 | AN6687 |
| 859  | CONTIG111 | 47779 | 48064 | 1.87 | 1.45E-03 | transcription_start_site | + | 52545 | 52545 | -4623 | 26237 | AN6687 |
| 859  | CONTIG111 | 47779 | 48064 | 1.87 | 1.45E-03 | transcription_start_site | + | 52725 | 52725 | -4803 | 26238 | AN6687 |
| 859  | CONTIG111 | 47779 | 48064 | 1.87 | 1.45E-03 | transcription_start_site | + | 53017 | 53017 | -5095 | 26239 | AN6687 |
| 1904 | CONTIG111 | 58359 | 58714 | 1    | 6.74E-02 | transcription_start_site | + | 58809 | 58809 | -272  | 26245 | AN6689 |
| 1904 | CONTIG111 | 58359 | 58714 | 1    | 6.74E-02 | transcription_start_site | + | 58935 | 58935 | -398  | 26246 | AN6689 |
| 1904 | CONTIG111 | 58359 | 58714 | 1    | 6.74E-02 | transcription_start_site | + | 59134 | 59134 | -597  | 26247 | AN6689 |
| 1904 | CONTIG111 | 58359 | 58714 | 1    | 6.74E-02 | transcription_start_site | + | 59418 | 59418 | -881  | 26248 | AN6689 |
| 1904 | CONTIG111 | 58359 | 58714 | 1    | 6.74E-02 | transcription_start_site | + | 61149 | 61149 | -2612 | 26249 | AN6690 |
| 1904 | CONTIG111 | 58359 | 58714 | 1    | 6.74E-02 | transcription_start_site | + | 61204 | 61204 | -2667 | 26250 | AN6690 |
| 1904 | CONTIG111 | 58359 | 58714 | 1    | 6.74E-02 | transcription_start_site | + | 61501 | 61501 | -2964 | 26251 | AN6690 |
| 2175 | CONTIG112 | 20863 | 21130 | 0.82 | 1.76E-01 | transcription_start_site | - | 17877 | 17877 | -3119 | 26273 | AN6695 |
| 2175 | CONTIG112 | 20863 | 21130 | 0.82 | 1.76E-01 | transcription_start_site | - | 17640 | 17640 | -3356 | 26274 | AN6695 |
| 2175 | CONTIG112 | 20863 | 21130 | 0.82 | 1.76E-01 | transcription_start_site | - | 16677 | 16677 | -4319 | 26275 | AN6695 |
| 2175 | CONTIG112 | 20863 | 21130 | 0.82 | 1.76E-01 | transcription_start_site | - | 16432 | 16432 | -4564 | 26276 | AN6695 |
| 466  | CONTIG112 | 24243 | 24587 | 2.36 | 0.00E+00 | transcription_start_site | - | 20408 | 20408 | -4007 | 26281 | AN6696 |
| 2175 | CONTIG112 | 20863 | 21130 | 0.82 | 1.76E-01 | transcription_start_site | - | 20408 | 20408 | -588  | 26281 | AN6696 |
| 2175 | CONTIG112 | 20863 | 21130 | 0.82 | 1.76E-01 | transcription_start_site | - | 18855 | 18855 | -2141 | 26282 | AN6696 |
| 466  | CONTIG112 | 24243 | 24587 | 2.36 | 0.00E+00 | transcription_start_site | - | 23347 | 23347 | -1068 | 26283 | AN6697 |
| 466  | CONTIG112 | 24243 | 24587 | 2.36 | 0.00E+00 | transcription_start_site | - | 22479 | 22479 | -1936 | 26284 | AN6697 |
| 466  | CONTIG112 | 24243 | 24587 | 2.36 | 0.00E+00 | transcription_start_site | - | 22048 | 22048 | -2367 | 26285 | AN6697 |
| 2175 | CONTIG112 | 20863 | 21130 | 0.82 | 1.76E-01 | transcription_start_site | - | 22048 | 22048 | 1051  | 26285 | AN6697 |
| 466  | CONTIG112 | 24243 | 24587 | 2.36 | 0.00E+00 | transcription_start_site | + | 26930 | 26930 | -2515 | 26286 | AN6698 |
| 466  | CONTIG112 | 24243 | 24587 | 2.36 | 0.00E+00 | transcription_start_site | + | 27057 | 27057 | -2642 | 26287 | AN6698 |
| 466  | CONTIG112 | 24243 | 24587 | 2.36 | 0.00E+00 | transcription_start_site | + | 28588 | 28588 | -4173 | 26288 | AN6699 |
| 466  | CONTIG112 | 24243 | 24587 | 2.36 | 0.00E+00 | transcription_start_site | + | 28944 | 28944 | -4529 | 26289 | AN6699 |
| 466  | CONTIG112 | 24243 | 24587 | 2.36 | 0.00E+00 | transcription_start_site | + | 29167 | 29167 | -4752 | 26290 | AN6699 |
| 487  | CONTIG112 | 36980 | 38839 | 2.33 | 0.00E+00 | transcription_start_site | - | 35825 | 35825 | -2084 | 26291 | AN6700 |
| 1094 | CONTIG112 | 36094 | 36744 | 1.61 | 3.78E-03 | transcription_start_site | - | 35825 | 35825 | -594  | 26291 | AN6700 |
| 1784 | CONTIG112 | 34219 | 35603 | 1.08 | 3.61E-02 | transcription_start_site | - | 35825 | 35825 | 914   | 26291 | AN6700 |
| 487  | CONTIG112 | 36980 | 38839 | 2.33 | 0.00E+00 | transcription_start_site | - | 39369 | 39369 | 1459  | 26295 | AN6701 |
| 487  | CONTIG112 | 36980 | 38839 | 2.33 | 0.00E+00 | transcription_start_site | - | 39493 | 39493 | 1583  | 26294 | AN6701 |
| 487  | CONTIG112 | 36980 | 38839 | 2.33 | 0.00E+00 | transcription_start_site | + | 42225 | 42225 | -4315 | 26296 | AN6702 |



|      |           |        |        |      |          |                          |   |        |        |       |       |        |
|------|-----------|--------|--------|------|----------|--------------------------|---|--------|--------|-------|-------|--------|
| 487  | CONTIG112 | 36980  | 38839  | 2.33 | 0.00E+00 | transcription_start_site | + | 42382  | 42382  | -4472 | 26297 | AN6702 |
| 487  | CONTIG112 | 36980  | 38839  | 2.33 | 0.00E+00 | transcription_start_site | + | 42642  | 42642  | -4732 | 26298 | AN6702 |
| 487  | CONTIG112 | 36980  | 38839  | 2.33 | 0.00E+00 | transcription_start_site | + | 42727  | 42727  | -4817 | 26299 | AN6702 |
| 487  | CONTIG112 | 36980  | 38839  | 2.33 | 0.00E+00 | transcription_start_site | + | 43193  | 43193  | -5283 | 26300 | AN6702 |
| 1072 | CONTIG112 | 47336  | 47629  | 1.64 | 9.32E-03 | transcription_start_site | + | 46641  | 46641  | 841   | 26305 | AN6702 |
| 1072 | CONTIG112 | 47336  | 47629  | 1.64 | 9.32E-03 | transcription_start_site | + | 46366  | 46366  | 1116  | 26304 | AN6702 |
| 1072 | CONTIG112 | 47336  | 47629  | 1.64 | 9.32E-03 | transcription_start_site | + | 48095  | 48095  | -612  | 26306 | AN6703 |
| 1072 | CONTIG112 | 47336  | 47629  | 1.64 | 9.32E-03 | transcription_start_site | + | 48342  | 48342  | -859  | 26307 | AN6703 |
| 1072 | CONTIG112 | 47336  | 47629  | 1.64 | 9.32E-03 | transcription_start_site | + | 49073  | 49073  | -1590 | 26308 | AN6703 |
| 1072 | CONTIG112 | 47336  | 47629  | 1.64 | 9.32E-03 | transcription_start_site | + | 51069  | 51069  | -3586 | 26309 | AN6704 |
| 1072 | CONTIG112 | 47336  | 47629  | 1.64 | 9.32E-03 | transcription_start_site | + | 51781  | 51781  | -4298 | 26310 | AN6704 |
| 1072 | CONTIG112 | 47336  | 47629  | 1.64 | 9.32E-03 | transcription_start_site | + | 52514  | 52514  | -5031 | 26311 | AN6705 |
| 2176 | CONTIG112 | 72466  | 72875  | 0.82 | 1.76E-01 | transcription_start_site | - | 69588  | 69588  | -3082 | 26328 | AN6710 |
| 2176 | CONTIG112 | 72466  | 72875  | 0.82 | 1.76E-01 | transcription_start_site | - | 69429  | 69429  | -3241 | 26329 | AN6710 |
| 2176 | CONTIG112 | 72466  | 72875  | 0.82 | 1.76E-01 | transcription_start_site | - | 68897  | 68897  | -3773 | 26330 | AN6710 |
| 2176 | CONTIG112 | 72466  | 72875  | 0.82 | 1.76E-01 | transcription_start_site | + | 71564  | 71564  | 1106  | 26335 | AN6711 |
| 1588 | CONTIG112 | 81766  | 82105  | 1.21 | 4.20E-02 | transcription_start_site | - | 81639  | 81639  | -296  | 26336 | AN6712 |
| 1588 | CONTIG112 | 81766  | 82105  | 1.21 | 4.20E-02 | transcription_start_site | - | 81543  | 81543  | -392  | 26337 | AN6712 |
| 1588 | CONTIG112 | 81766  | 82105  | 1.21 | 4.20E-02 | transcription_start_site | - | 81103  | 81103  | -832  | 26338 | AN6712 |
| 1588 | CONTIG112 | 81766  | 82105  | 1.21 | 4.20E-02 | transcription_start_site | - | 80897  | 80897  | -1038 | 26339 | AN6712 |
| 1588 | CONTIG112 | 81766  | 82105  | 1.21 | 4.20E-02 | transcription_start_site | - | 80222  | 80222  | -1713 | 26340 | AN6712 |
| 1588 | CONTIG112 | 81766  | 82105  | 1.21 | 4.20E-02 | transcription_start_site | - | 79914  | 79914  | -2021 | 26341 | AN6712 |
| 1588 | CONTIG112 | 81766  | 82105  | 1.21 | 4.20E-02 | transcription_start_site | - | 79401  | 79401  | -2534 | 26342 | AN6712 |
| 1588 | CONTIG112 | 81766  | 82105  | 1.21 | 4.20E-02 | transcription_start_site | - | 78785  | 78785  | -3150 | 26343 | AN6712 |
| 1588 | CONTIG112 | 81766  | 82105  | 1.21 | 4.20E-02 | transcription_start_site | + | 82082  | 82082  | -146  | 26344 | AN6713 |
| 1588 | CONTIG112 | 81766  | 82105  | 1.21 | 4.20E-02 | transcription_start_site | + | 82311  | 82311  | -375  | 26345 | AN6713 |
| 1588 | CONTIG112 | 81766  | 82105  | 1.21 | 4.20E-02 | transcription_start_site | + | 82439  | 82439  | -503  | 26346 | AN6713 |
| 1588 | CONTIG112 | 81766  | 82105  | 1.21 | 4.20E-02 | transcription_start_site | + | 82531  | 82531  | -595  | 26347 | AN6713 |
| 1588 | CONTIG112 | 81766  | 82105  | 1.21 | 4.20E-02 | transcription_start_site | + | 82714  | 82714  | -778  | 26348 | AN6713 |
| 1588 | CONTIG112 | 81766  | 82105  | 1.21 | 4.20E-02 | transcription_start_site | + | 82892  | 82892  | -956  | 26349 | AN6713 |
| 1588 | CONTIG112 | 81766  | 82105  | 1.21 | 4.20E-02 | transcription_start_site | + | 83038  | 83038  | -1102 | 26350 | AN6713 |
| 1588 | CONTIG112 | 81766  | 82105  | 1.21 | 4.20E-02 | transcription_start_site | + | 83362  | 83362  | -1426 | 26351 | AN6713 |
| 2136 | CONTIG112 | 91804  | 92084  | 0.85 | 1.54E-01 | transcription_start_site | - | 87003  | 87003  | -4941 | 26352 | AN6714 |
| 1099 | CONTIG112 | 93239  | 93510  | 1.61 | 9.96E-03 | transcription_start_site | - | 91212  | 91212  | -2162 | 26353 | AN6715 |
| 1099 | CONTIG112 | 93239  | 93510  | 1.61 | 9.96E-03 | transcription_start_site | - | 90833  | 90833  | -2541 | 26354 | AN6715 |
| 1099 | CONTIG112 | 93239  | 93510  | 1.61 | 9.96E-03 | transcription_start_site | - | 89109  | 89109  | -4265 | 26355 | AN6715 |
| 2136 | CONTIG112 | 91804  | 92084  | 0.85 | 1.54E-01 | transcription_start_site | - | 91212  | 91212  | -732  | 26353 | AN6715 |
| 2136 | CONTIG112 | 91804  | 92084  | 0.85 | 1.54E-01 | transcription_start_site | - | 90833  | 90833  | -1111 | 26354 | AN6715 |
| 2136 | CONTIG112 | 91804  | 92084  | 0.85 | 1.54E-01 | transcription_start_site | - | 89109  | 89109  | -2835 | 26355 | AN6715 |
| 2136 | CONTIG112 | 91804  | 92084  | 0.85 | 1.54E-01 | transcription_start_site | + | 91813  | 91813  | 131   | 26356 | AN6716 |
| 2136 | CONTIG112 | 91804  | 92084  | 0.85 | 1.54E-01 | transcription_start_site | + | 92090  | 92090  | -146  | 26357 | AN6716 |
| 1099 | CONTIG112 | 93239  | 93510  | 1.61 | 9.96E-03 | transcription_start_site | + | 96200  | 96200  | -2825 | 26358 | AN6717 |
| 1099 | CONTIG112 | 93239  | 93510  | 1.61 | 9.96E-03 | transcription_start_site | + | 96363  | 96363  | -2988 | 26359 | AN6717 |
| 1099 | CONTIG112 | 93239  | 93510  | 1.61 | 9.96E-03 | transcription_start_site | + | 96544  | 96544  | -3169 | 26360 | AN6717 |
| 1099 | CONTIG112 | 93239  | 93510  | 1.61 | 9.96E-03 | transcription_start_site | + | 96748  | 96748  | -3373 | 26361 | AN6717 |
| 1099 | CONTIG112 | 93239  | 93510  | 1.61 | 9.96E-03 | transcription_start_site | + | 96893  | 96893  | -3518 | 26362 | AN6717 |
| 2136 | CONTIG112 | 91804  | 92084  | 0.85 | 1.54E-01 | transcription_start_site | + | 96200  | 96200  | -4256 | 26358 | AN6717 |
| 2136 | CONTIG112 | 91804  | 92084  | 0.85 | 1.54E-01 | transcription_start_site | + | 96363  | 96363  | -4419 | 26359 | AN6717 |
| 2136 | CONTIG112 | 91804  | 92084  | 0.85 | 1.54E-01 | transcription_start_site | + | 96544  | 96544  | -4600 | 26360 | AN6717 |
| 2136 | CONTIG112 | 91804  | 92084  | 0.85 | 1.54E-01 | transcription_start_site | + | 96748  | 96748  | -4804 | 26361 | AN6717 |
| 2136 | CONTIG112 | 91804  | 92084  | 0.85 | 1.54E-01 | transcription_start_site | + | 96893  | 96893  | -4949 | 26362 | AN6717 |
| 2206 | CONTIG112 | 96619  | 96878  | 0.79 | 1.97E-01 | transcription_start_site | + | 96748  | 96748  | 0     | 26361 | AN6717 |
| 2206 | CONTIG112 | 96619  | 96878  | 0.79 | 1.97E-01 | transcription_start_site | + | 96893  | 96893  | -144  | 26362 | AN6717 |
| 2206 | CONTIG112 | 96619  | 96878  | 0.79 | 1.97E-01 | transcription_start_site | + | 96544  | 96544  | 204   | 26360 | AN6717 |
| 2206 | CONTIG112 | 96619  | 96878  | 0.79 | 1.97E-01 | transcription_start_site | + | 96363  | 96363  | 385   | 26359 | AN6717 |
| 2206 | CONTIG112 | 96619  | 96878  | 0.79 | 1.97E-01 | transcription_start_site | + | 96200  | 96200  | 548   | 26358 | AN6717 |
| 1411 | CONTIG112 | 114466 | 114960 | 1.34 | 2.63E-02 | transcription_start_site | + | 115290 | 115290 | -577  | 26369 | AN6721 |

|      |           |        |        |      |          |                          |   |        |        |       |       |        |
|------|-----------|--------|--------|------|----------|--------------------------|---|--------|--------|-------|-------|--------|
| 329  | CONTIG112 | 140190 | 140555 | 2.56 | 0.00E+00 | transcription_start_site | - | 135546 | 135546 | -4826 | 26384 | AN6728 |
| 329  | CONTIG112 | 140190 | 140555 | 2.56 | 0.00E+00 | transcription_start_site | - | 135456 | 135456 | -4916 | 26385 | AN6728 |
| 329  | CONTIG112 | 140190 | 140555 | 2.56 | 0.00E+00 | transcription_start_site | - | 135202 | 135202 | -5170 | 26386 | AN6728 |
| 2207 | CONTIG112 | 138840 | 139409 | 0.79 | 1.97E-01 | transcription_start_site | - | 135546 | 135546 | -3578 | 26384 | AN6728 |
| 2207 | CONTIG112 | 138840 | 139409 | 0.79 | 1.97E-01 | transcription_start_site | - | 135456 | 135456 | -3668 | 26385 | AN6728 |
| 2207 | CONTIG112 | 138840 | 139409 | 0.79 | 1.97E-01 | transcription_start_site | - | 135202 | 135202 | -3922 | 26386 | AN6728 |
| 2207 | CONTIG112 | 138840 | 139409 | 0.79 | 1.97E-01 | transcription_start_site | - | 135103 | 135103 | -4021 | 26387 | AN6728 |
| 2207 | CONTIG112 | 138840 | 139409 | 0.79 | 1.97E-01 | transcription_start_site | - | 134436 | 134436 | -4688 | 26388 | AN6728 |
| 329  | CONTIG112 | 140190 | 140555 | 2.56 | 0.00E+00 | transcription_start_site | - | 139413 | 139413 | -959  | 26390 | AN6730 |
| 329  | CONTIG112 | 140190 | 140555 | 2.56 | 0.00E+00 | transcription_start_site | - | 139108 | 139108 | -1264 | 26391 | AN6730 |
| 1631 | CONTIG112 | 142877 | 143466 | 1.18 | 2.30E-02 | transcription_start_site | - | 139413 | 139413 | -3758 | 26390 | AN6730 |
| 1631 | CONTIG112 | 142877 | 143466 | 1.18 | 2.30E-02 | transcription_start_site | - | 139108 | 139108 | -4063 | 26391 | AN6730 |
| 2207 | CONTIG112 | 138840 | 139409 | 0.79 | 1.97E-01 | transcription_start_site | - | 139108 | 139108 | -16   | 26391 | AN6730 |
| 2207 | CONTIG112 | 138840 | 139409 | 0.79 | 1.97E-01 | transcription_start_site | - | 139413 | 139413 | 288   | 26390 | AN6730 |
| 329  | CONTIG112 | 140190 | 140555 | 2.56 | 0.00E+00 | transcription_start_site | + | 140769 | 140769 | -396  | 26392 | AN6731 |
| 329  | CONTIG112 | 140190 | 140555 | 2.56 | 0.00E+00 | transcription_start_site | + | 141059 | 141059 | -686  | 26393 | AN6731 |
| 2207 | CONTIG112 | 138840 | 139409 | 0.79 | 1.97E-01 | transcription_start_site | + | 140769 | 140769 | -1644 | 26392 | AN6731 |
| 2207 | CONTIG112 | 138840 | 139409 | 0.79 | 1.97E-01 | transcription_start_site | + | 141059 | 141059 | -1934 | 26393 | AN6731 |
| 863  | CONTIG112 | 145219 | 145553 | 1.87 | 3.37E-03 | transcription_start_site | - | 145218 | 145218 | -168  | 26395 | AN6732 |
| 863  | CONTIG112 | 145219 | 145553 | 1.87 | 3.37E-03 | transcription_start_site | - | 145594 | 145594 | 208   | 26394 | AN6732 |
| 863  | CONTIG112 | 145219 | 145553 | 1.87 | 3.37E-03 | transcription_start_site | - | 144829 | 144829 | -557  | 26396 | AN6732 |
| 1493 | CONTIG112 | 149479 | 149765 | 1.28 | 3.34E-02 | transcription_start_site | - | 145594 | 145594 | -4028 | 26394 | AN6732 |
| 1493 | CONTIG112 | 149479 | 149765 | 1.28 | 3.34E-02 | transcription_start_site | - | 145218 | 145218 | -4404 | 26395 | AN6732 |
| 1493 | CONTIG112 | 149479 | 149765 | 1.28 | 3.34E-02 | transcription_start_site | - | 144829 | 144829 | -4793 | 26396 | AN6732 |
| 1493 | CONTIG112 | 149479 | 149765 | 1.28 | 3.34E-02 | transcription_start_site | - | 149146 | 149146 | -476  | 26397 | AN6733 |
| 1493 | CONTIG112 | 149479 | 149765 | 1.28 | 3.34E-02 | transcription_start_site | - | 148867 | 148867 | -755  | 26398 | AN6733 |
| 1835 | CONTIG112 | 186830 | 187114 | 1.05 | 7.66E-02 | transcription_start_site | - | 183237 | 183237 | -3735 | 26438 | AN6744 |
| 1835 | CONTIG112 | 186830 | 187114 | 1.05 | 7.66E-02 | transcription_start_site | - | 182902 | 182902 | -4070 | 26439 | AN6744 |
| 1835 | CONTIG112 | 186830 | 187114 | 1.05 | 7.66E-02 | transcription_start_site | - | 186487 | 186487 | -485  | 26443 | AN6746 |
| 1835 | CONTIG112 | 186830 | 187114 | 1.05 | 7.66E-02 | transcription_start_site | - | 186429 | 186429 | -543  | 26444 | AN6746 |
| 1835 | CONTIG112 | 186830 | 187114 | 1.05 | 7.66E-02 | transcription_start_site | - | 186257 | 186257 | -715  | 26445 | AN6746 |
| 1835 | CONTIG112 | 186830 | 187114 | 1.05 | 7.66E-02 | transcription_start_site | + | 187096 | 187096 | -124  | 26446 | AN6747 |
| 1835 | CONTIG112 | 186830 | 187114 | 1.05 | 7.66E-02 | transcription_start_site | + | 187244 | 187244 | -272  | 26447 | AN6747 |
| 1835 | CONTIG112 | 186830 | 187114 | 1.05 | 7.66E-02 | transcription_start_site | + | 187658 | 187658 | -686  | 26448 | AN6747 |
| 1835 | CONTIG112 | 186830 | 187114 | 1.05 | 7.66E-02 | transcription_start_site | + | 188726 | 188726 | -1754 | 26449 | AN6747 |
| 1835 | CONTIG112 | 186830 | 187114 | 1.05 | 7.66E-02 | transcription_start_site | + | 188935 | 188935 | -1963 | 26450 | AN6747 |
| 1835 | CONTIG112 | 186830 | 187114 | 1.05 | 7.66E-02 | transcription_start_site | + | 189113 | 189113 | -2141 | 26451 | AN6747 |
| 1835 | CONTIG112 | 186830 | 187114 | 1.05 | 7.66E-02 | transcription_start_site | + | 191138 | 191138 | -4166 | 26452 | AN6748 |
| 1835 | CONTIG112 | 186830 | 187114 | 1.05 | 7.66E-02 | transcription_start_site | + | 191664 | 191664 | -4692 | 26453 | AN6748 |
| 513  | CONTIG112 | 200105 | 200394 | 2.29 | 2.69E-04 | transcription_start_site | - | 195124 | 195124 | -5125 | 26454 | AN6749 |
| 771  | CONTIG112 | 195170 | 195439 | 1.97 | 1.77E-03 | transcription_start_site | - | 195124 | 195124 | -180  | 26454 | AN6749 |
| 771  | CONTIG112 | 195170 | 195439 | 1.97 | 1.77E-03 | transcription_start_site | - | 194760 | 194760 | -544  | 26455 | AN6749 |
| 771  | CONTIG112 | 195170 | 195439 | 1.97 | 1.77E-03 | transcription_start_site | - | 194658 | 194658 | -646  | 26456 | AN6749 |
| 771  | CONTIG112 | 195170 | 195439 | 1.97 | 1.77E-03 | transcription_start_site | - | 194157 | 194157 | -1147 | 26457 | AN6749 |
| 771  | CONTIG112 | 195170 | 195439 | 1.97 | 1.77E-03 | transcription_start_site | - | 194079 | 194079 | -1225 | 26458 | AN6749 |
| 1021 | CONTIG112 | 192920 | 193344 | 1.7  | 7.08E-03 | transcription_start_site | - | 194079 | 194079 | 947   | 26458 | AN6749 |
| 1021 | CONTIG112 | 192920 | 193344 | 1.7  | 7.08E-03 | transcription_start_site | - | 194157 | 194157 | 1025  | 26457 | AN6749 |
| 771  | CONTIG112 | 195170 | 195439 | 1.97 | 1.77E-03 | transcription_start_site | + | 195914 | 195914 | -609  | 26459 | AN6750 |
| 771  | CONTIG112 | 195170 | 195439 | 1.97 | 1.77E-03 | transcription_start_site | + | 196081 | 196081 | -776  | 26460 | AN6750 |
| 771  | CONTIG112 | 195170 | 195439 | 1.97 | 1.77E-03 | transcription_start_site | + | 196186 | 196186 | -881  | 26461 | AN6750 |
| 1021 | CONTIG112 | 192920 | 193344 | 1.7  | 7.08E-03 | transcription_start_site | + | 195914 | 195914 | -2782 | 26459 | AN6750 |
| 1021 | CONTIG112 | 192920 | 193344 | 1.7  | 7.08E-03 | transcription_start_site | + | 196081 | 196081 | -2949 | 26460 | AN6750 |
| 1021 | CONTIG112 | 192920 | 193344 | 1.7  | 7.08E-03 | transcription_start_site | + | 196186 | 196186 | -3054 | 26461 | AN6750 |
| 513  | CONTIG112 | 200105 | 200394 | 2.29 | 2.69E-04 | transcription_start_site | - | 199642 | 199642 | -607  | 26462 | AN6751 |
| 513  | CONTIG112 | 200105 | 200394 | 2.29 | 2.69E-04 | transcription_start_site | - | 199157 | 199157 | -1092 | 26463 | AN6751 |
| 513  | CONTIG112 | 200105 | 200394 | 2.29 | 2.69E-04 | transcription_start_site | - | 198596 | 198596 | -1653 | 26464 | AN6751 |
| 1073 | CONTIG112 | 203195 | 203544 | 1.64 | 9.32E-03 | transcription_start_site | - | 199642 | 199642 | -3727 | 26462 | AN6751 |

|      |           |        |        |      |          |                          |   |        |        |       |       |        |
|------|-----------|--------|--------|------|----------|--------------------------|---|--------|--------|-------|-------|--------|
| 1073 | CONTIG112 | 203195 | 203544 | 1.64 | 9.32E-03 | transcription_start_site | - | 199157 | 199157 | -4212 | 26463 | AN6751 |
| 1073 | CONTIG112 | 203195 | 203544 | 1.64 | 9.32E-03 | transcription_start_site | - | 198596 | 198596 | -4773 | 26464 | AN6751 |
| 513  | CONTIG112 | 200105 | 200394 | 2.29 | 2.69E-04 | transcription_start_site | + | 200869 | 200869 | -619  | 26465 | AN6752 |
| 513  | CONTIG112 | 200105 | 200394 | 2.29 | 2.69E-04 | transcription_start_site | + | 201308 | 201308 | -1058 | 26466 | AN6752 |
| 513  | CONTIG112 | 200105 | 200394 | 2.29 | 2.69E-04 | transcription_start_site | + | 201728 | 201728 | -1478 | 26467 | AN6752 |
| 513  | CONTIG112 | 200105 | 200394 | 2.29 | 2.69E-04 | transcription_start_site | + | 202443 | 202443 | -2193 | 26468 | AN6752 |
| 1073 | CONTIG112 | 203195 | 203544 | 1.64 | 9.32E-03 | transcription_start_site | + | 202443 | 202443 | 926   | 26468 | AN6752 |
| 513  | CONTIG112 | 200105 | 200394 | 2.29 | 2.69E-04 | transcription_start_site | + | 203890 | 203890 | -3640 | 26469 | AN6753 |
| 1073 | CONTIG112 | 203195 | 203544 | 1.64 | 9.32E-03 | transcription_start_site | + | 203890 | 203890 | -520  | 26469 | AN6753 |
| 945  | CONTIG112 | 207320 | 207669 | 1.77 | 5.08E-03 | transcription_start_site | + | 207589 | 207589 | -94   | 26470 | AN6754 |
| 945  | CONTIG112 | 207320 | 207669 | 1.77 | 5.08E-03 | transcription_start_site | + | 207772 | 207772 | -277  | 26471 | AN6754 |
| 945  | CONTIG112 | 207320 | 207669 | 1.77 | 5.08E-03 | transcription_start_site | + | 207981 | 207981 | -486  | 26472 | AN6754 |
| 1073 | CONTIG112 | 203195 | 203544 | 1.64 | 9.32E-03 | transcription_start_site | + | 207589 | 207589 | -4219 | 26470 | AN6754 |
| 1073 | CONTIG112 | 203195 | 203544 | 1.64 | 9.32E-03 | transcription_start_site | + | 207772 | 207772 | -4402 | 26471 | AN6754 |
| 1073 | CONTIG112 | 203195 | 203544 | 1.64 | 9.32E-03 | transcription_start_site | + | 207981 | 207981 | -4611 | 26472 | AN6754 |
| 1879 | CONTIG112 | 268519 | 268928 | 1.02 | 4.73E-02 | transcription_start_site | - | 265186 | 265186 | -3537 | 26558 | AN6775 |
| 1879 | CONTIG112 | 268519 | 268928 | 1.02 | 4.73E-02 | transcription_start_site | - | 265094 | 265094 | -3629 | 26559 | AN6775 |
| 1879 | CONTIG112 | 268519 | 268928 | 1.02 | 4.73E-02 | transcription_start_site | - | 264864 | 264864 | -3859 | 26560 | AN6775 |
| 1879 | CONTIG112 | 268519 | 268928 | 1.02 | 4.73E-02 | transcription_start_site | - | 264665 | 264665 | -4058 | 26561 | AN6775 |
| 1298 | CONTIG112 | 291458 | 291732 | 1.44 | 1.80E-02 | transcription_start_site | - | 290337 | 290337 | -1258 | 26585 | AN6782 |
| 1298 | CONTIG112 | 291458 | 291732 | 1.44 | 1.80E-02 | transcription_start_site | - | 289993 | 289993 | -1602 | 26586 | AN6782 |
| 1298 | CONTIG112 | 291458 | 291732 | 1.44 | 1.80E-02 | transcription_start_site | + | 291795 | 291795 | -200  | 26587 | AN6783 |
| 1298 | CONTIG112 | 291458 | 291732 | 1.44 | 1.80E-02 | transcription_start_site | + | 292121 | 292121 | -526  | 26588 | AN6783 |
| 1298 | CONTIG112 | 291458 | 291732 | 1.44 | 1.80E-02 | transcription_start_site | + | 292689 | 292689 | -1094 | 26589 | AN6783 |
| 1298 | CONTIG112 | 291458 | 291732 | 1.44 | 1.80E-02 | transcription_start_site | + | 293560 | 293560 | -1965 | 26590 | AN6783 |
| 2167 | CONTIG112 | 305261 | 305758 | 0.82 | 1.15E-01 | transcription_start_site | - | 303057 | 303057 | -2452 | 26595 | AN6786 |
| 2167 | CONTIG112 | 305261 | 305758 | 0.82 | 1.15E-01 | transcription_start_site | - | 302751 | 302751 | -2758 | 26596 | AN6786 |
| 2167 | CONTIG112 | 305261 | 305758 | 0.82 | 1.15E-01 | transcription_start_site | - | 302623 | 302623 | -2886 | 26597 | AN6786 |
| 2167 | CONTIG112 | 305261 | 305758 | 0.82 | 1.15E-01 | transcription_start_site | + | 305766 | 305766 | -256  | 26598 | AN6787 |
| 2167 | CONTIG112 | 305261 | 305758 | 0.82 | 1.15E-01 | transcription_start_site | + | 307011 | 307011 | -1501 | 26599 | AN6787 |
| 2167 | CONTIG112 | 305261 | 305758 | 0.82 | 1.15E-01 | transcription_start_site | + | 307088 | 307088 | -1578 | 26600 | AN6787 |
| 2167 | CONTIG112 | 305261 | 305758 | 0.82 | 1.15E-01 | transcription_start_site | + | 307224 | 307224 | -1714 | 26601 | AN6787 |
| 2167 | CONTIG112 | 305261 | 305758 | 0.82 | 1.15E-01 | transcription_start_site | + | 307433 | 307433 | -1923 | 26602 | AN6787 |
| 1150 | CONTIG112 | 318770 | 319179 | 1.57 | 1.06E-02 | transcription_start_site | - | 318265 | 318265 | -709  | 26611 | AN6790 |
| 1150 | CONTIG112 | 318770 | 319179 | 1.57 | 1.06E-02 | transcription_start_site | - | 318121 | 318121 | -853  | 26612 | AN6790 |
| 1150 | CONTIG112 | 318770 | 319179 | 1.57 | 1.06E-02 | transcription_start_site | - | 317285 | 317285 | -1689 | 26613 | AN6790 |
| 1150 | CONTIG112 | 318770 | 319179 | 1.57 | 1.06E-02 | transcription_start_site | - | 316967 | 316967 | -2007 | 26614 | AN6790 |
| 1150 | CONTIG112 | 318770 | 319179 | 1.57 | 1.06E-02 | transcription_start_site | + | 320066 | 320066 | -1091 | 26615 | AN6791 |
| 1150 | CONTIG112 | 318770 | 319179 | 1.57 | 1.06E-02 | transcription_start_site | + | 320453 | 320453 | -1478 | 26616 | AN6791 |
| 1150 | CONTIG112 | 318770 | 319179 | 1.57 | 1.06E-02 | transcription_start_site | + | 320561 | 320561 | -1586 | 26617 | AN6791 |
| 1150 | CONTIG112 | 318770 | 319179 | 1.57 | 1.06E-02 | transcription_start_site | + | 320921 | 320921 | -1946 | 26618 | AN6791 |
| 896  | CONTIG112 | 351166 | 351580 | 1.83 | 4.01E-03 | transcription_start_site | + | 351537 | 351537 | -164  | 26640 | AN6801 |
| 896  | CONTIG112 | 351166 | 351580 | 1.83 | 4.01E-03 | transcription_start_site | + | 352055 | 352055 | -682  | 26641 | AN6801 |
| 81   | CONTIG113 | 13296  | 13630  | 3.14 | 0.00E+00 | transcription_start_site | - | 12452  | 12452  | -1011 | 26650 | AN6804 |
| 81   | CONTIG113 | 13296  | 13630  | 3.14 | 0.00E+00 | transcription_start_site | - | 12260  | 12260  | -1203 | 26651 | AN6804 |
| 81   | CONTIG113 | 13296  | 13630  | 3.14 | 0.00E+00 | transcription_start_site | - | 11824  | 11824  | -1639 | 26652 | AN6804 |
| 81   | CONTIG113 | 13296  | 13630  | 3.14 | 0.00E+00 | transcription_start_site | - | 11521  | 11521  | -1942 | 26653 | AN6804 |
| 81   | CONTIG113 | 13296  | 13630  | 3.14 | 0.00E+00 | transcription_start_site | - | 11075  | 11075  | -2388 | 26654 | AN6804 |
| 81   | CONTIG113 | 13296  | 13630  | 3.14 | 0.00E+00 | transcription_start_site | - | 10868  | 10868  | -2595 | 26655 | AN6804 |
| 81   | CONTIG113 | 13296  | 13630  | 3.14 | 0.00E+00 | transcription_start_site | - | 10710  | 10710  | -2753 | 26656 | AN6804 |
| 81   | CONTIG113 | 13296  | 13630  | 3.14 | 0.00E+00 | transcription_start_site | - | 10522  | 10522  | -2941 | 26657 | AN6804 |
| 81   | CONTIG113 | 13296  | 13630  | 3.14 | 0.00E+00 | transcription_start_site | - | 10399  | 10399  | -3064 | 26658 | AN6804 |
| 81   | CONTIG113 | 13296  | 13630  | 3.14 | 0.00E+00 | transcription_start_site | - | 10256  | 10256  | -3207 | 26659 | AN6804 |
| 160  | CONTIG113 | 13666  | 14466  | 2.92 | 0.00E+00 | transcription_start_site | - | 12452  | 12452  | -1614 | 26650 | AN6804 |
| 160  | CONTIG113 | 13666  | 14466  | 2.92 | 0.00E+00 | transcription_start_site | - | 12260  | 12260  | -1806 | 26651 | AN6804 |
| 160  | CONTIG113 | 13666  | 14466  | 2.92 | 0.00E+00 | transcription_start_site | - | 11824  | 11824  | -2242 | 26652 | AN6804 |
| 160  | CONTIG113 | 13666  | 14466  | 2.92 | 0.00E+00 | transcription_start_site | - | 11521  | 11521  | -2545 | 26653 | AN6804 |

|      |           |        |        |      |          |                          |   |        |        |       |       |        |
|------|-----------|--------|--------|------|----------|--------------------------|---|--------|--------|-------|-------|--------|
| 160  | CONTIG113 | 13666  | 14466  | 2.92 | 0.00E+00 | transcription_start_site | - | 11075  | 11075  | -2991 | 26654 | AN6804 |
| 160  | CONTIG113 | 13666  | 14466  | 2.92 | 0.00E+00 | transcription_start_site | - | 10868  | 10868  | -3198 | 26655 | AN6804 |
| 160  | CONTIG113 | 13666  | 14466  | 2.92 | 0.00E+00 | transcription_start_site | - | 10710  | 10710  | -3356 | 26656 | AN6804 |
| 160  | CONTIG113 | 13666  | 14466  | 2.92 | 0.00E+00 | transcription_start_site | - | 10522  | 10522  | -3544 | 26657 | AN6804 |
| 160  | CONTIG113 | 13666  | 14466  | 2.92 | 0.00E+00 | transcription_start_site | - | 10399  | 10399  | -3667 | 26658 | AN6804 |
| 160  | CONTIG113 | 13666  | 14466  | 2.92 | 0.00E+00 | transcription_start_site | - | 10256  | 10256  | -3810 | 26659 | AN6804 |
| 664  | CONTIG113 | 12456  | 12745  | 2.09 | 1.06E-02 | transcription_start_site | - | 12452  | 12452  | -148  | 26650 | AN6804 |
| 664  | CONTIG113 | 12456  | 12745  | 2.09 | 1.06E-02 | transcription_start_site | - | 12260  | 12260  | -340  | 26651 | AN6804 |
| 664  | CONTIG113 | 12456  | 12745  | 2.09 | 1.06E-02 | transcription_start_site | - | 11824  | 11824  | -776  | 26652 | AN6804 |
| 664  | CONTIG113 | 12456  | 12745  | 2.09 | 1.06E-02 | transcription_start_site | - | 11521  | 11521  | -1079 | 26653 | AN6804 |
| 664  | CONTIG113 | 12456  | 12745  | 2.09 | 1.06E-02 | transcription_start_site | - | 11075  | 11075  | -1525 | 26654 | AN6804 |
| 664  | CONTIG113 | 12456  | 12745  | 2.09 | 1.06E-02 | transcription_start_site | - | 10868  | 10868  | -1732 | 26655 | AN6804 |
| 664  | CONTIG113 | 12456  | 12745  | 2.09 | 1.06E-02 | transcription_start_site | - | 10710  | 10710  | -1890 | 26656 | AN6804 |
| 664  | CONTIG113 | 12456  | 12745  | 2.09 | 1.06E-02 | transcription_start_site | - | 10522  | 10522  | -2078 | 26657 | AN6804 |
| 664  | CONTIG113 | 12456  | 12745  | 2.09 | 1.06E-02 | transcription_start_site | - | 10399  | 10399  | -2201 | 26658 | AN6804 |
| 664  | CONTIG113 | 12456  | 12745  | 2.09 | 1.06E-02 | transcription_start_site | - | 10256  | 10256  | -2344 | 26659 | AN6804 |
| 543  | CONTIG113 | 27092  | 27351  | 2.26 | 7.08E-03 | transcription_start_site | - | 23446  | 23446  | -3775 | 26660 | AN6805 |
| 543  | CONTIG113 | 27092  | 27351  | 2.26 | 7.08E-03 | transcription_start_site | - | 22846  | 22846  | -4375 | 26661 | AN6805 |
| 543  | CONTIG113 | 27092  | 27351  | 2.26 | 7.08E-03 | transcription_start_site | - | 22126  | 22126  | -5095 | 26662 | AN6805 |
| 1155 | CONTIG113 | 24015  | 24279  | 1.57 | 4.78E-02 | transcription_start_site | - | 23446  | 23446  | -701  | 26660 | AN6805 |
| 1155 | CONTIG113 | 24015  | 24279  | 1.57 | 4.78E-02 | transcription_start_site | - | 22846  | 22846  | -1301 | 26661 | AN6805 |
| 1155 | CONTIG113 | 24015  | 24279  | 1.57 | 4.78E-02 | transcription_start_site | - | 22126  | 22126  | -2021 | 26662 | AN6805 |
| 1155 | CONTIG113 | 24015  | 24279  | 1.57 | 4.78E-02 | transcription_start_site | + | 24985  | 24985  | -838  | 26663 | AN6806 |
| 1155 | CONTIG113 | 24015  | 24279  | 1.57 | 4.78E-02 | transcription_start_site | + | 25287  | 25287  | -1140 | 26664 | AN6806 |
| 543  | CONTIG113 | 27092  | 27351  | 2.26 | 7.08E-03 | transcription_start_site | + | 27735  | 27735  | -513  | 26665 | AN6807 |
| 543  | CONTIG113 | 27092  | 27351  | 2.26 | 7.08E-03 | transcription_start_site | + | 29311  | 29311  | -2089 | 26666 | AN6807 |
| 543  | CONTIG113 | 27092  | 27351  | 2.26 | 7.08E-03 | transcription_start_site | + | 29892  | 29892  | -2670 | 26667 | AN6807 |
| 543  | CONTIG113 | 27092  | 27351  | 2.26 | 7.08E-03 | transcription_start_site | + | 31418  | 31418  | -4196 | 26668 | AN6807 |
| 543  | CONTIG113 | 27092  | 27351  | 2.26 | 7.08E-03 | transcription_start_site | + | 31734  | 31734  | -4512 | 26669 | AN6807 |
| 543  | CONTIG113 | 27092  | 27351  | 2.26 | 7.08E-03 | transcription_start_site | + | 31943  | 31943  | -4721 | 26670 | AN6807 |
| 1155 | CONTIG113 | 24015  | 24279  | 1.57 | 4.78E-02 | transcription_start_site | + | 27735  | 27735  | -3588 | 26665 | AN6807 |
| 1068 | CONTIG113 | 61505  | 61784  | 1.65 | 3.70E-02 | transcription_start_site | - | 56689  | 56689  | -4955 | 26702 | AN6816 |
| 1068 | CONTIG113 | 61505  | 61784  | 1.65 | 3.70E-02 | transcription_start_site | + | 61679  | 61679  | -34   | 26709 | AN6820 |
| 1068 | CONTIG113 | 61505  | 61784  | 1.65 | 3.70E-02 | transcription_start_site | + | 61860  | 61860  | -215  | 26710 | AN6820 |
| 1068 | CONTIG113 | 61505  | 61784  | 1.65 | 3.70E-02 | transcription_start_site | + | 64778  | 64778  | -3133 | 26711 | AN6820 |
| 26   | CONTIG113 | 73652  | 74011  | 3.4  | 0.00E+00 | transcription_start_site | - | 71040  | 71040  | -2791 | 26714 | AN6822 |
| 26   | CONTIG113 | 73652  | 74011  | 3.4  | 0.00E+00 | transcription_start_site | - | 70822  | 70822  | -3009 | 26715 | AN6822 |
| 26   | CONTIG113 | 73652  | 74011  | 3.4  | 0.00E+00 | transcription_start_site | - | 70356  | 70356  | -3475 | 26716 | AN6822 |
| 26   | CONTIG113 | 73652  | 74011  | 3.4  | 0.00E+00 | transcription_start_site | - | 70040  | 70040  | -3791 | 26717 | AN6822 |
| 185  | CONTIG113 | 74042  | 74916  | 2.87 | 0.00E+00 | transcription_start_site | - | 71040  | 71040  | -3439 | 26714 | AN6822 |
| 185  | CONTIG113 | 74042  | 74916  | 2.87 | 0.00E+00 | transcription_start_site | - | 70822  | 70822  | -3657 | 26715 | AN6822 |
| 185  | CONTIG113 | 74042  | 74916  | 2.87 | 0.00E+00 | transcription_start_site | - | 70356  | 70356  | -4123 | 26716 | AN6822 |
| 185  | CONTIG113 | 74042  | 74916  | 2.87 | 0.00E+00 | transcription_start_site | - | 70040  | 70040  | -4439 | 26717 | AN6822 |
| 26   | CONTIG113 | 73652  | 74011  | 3.4  | 0.00E+00 | transcription_start_site | - | 72744  | 72744  | -1087 | 26718 | AN6823 |
| 185  | CONTIG113 | 74042  | 74916  | 2.87 | 0.00E+00 | transcription_start_site | - | 72744  | 72744  | -1735 | 26718 | AN6823 |
| 256  | CONTIG113 | 77262  | 77528  | 2.7  | 1.45E-03 | transcription_start_site | - | 72744  | 72744  | -4651 | 26718 | AN6823 |
| 185  | CONTIG113 | 74042  | 74916  | 2.87 | 0.00E+00 | transcription_start_site | + | 79686  | 79686  | -5207 | 26719 | AN6824 |
| 185  | CONTIG113 | 74042  | 74916  | 2.87 | 0.00E+00 | transcription_start_site | + | 79767  | 79767  | -5288 | 26720 | AN6824 |
| 185  | CONTIG113 | 74042  | 74916  | 2.87 | 0.00E+00 | transcription_start_site | + | 79866  | 79866  | -5387 | 26721 | AN6824 |
| 256  | CONTIG113 | 77262  | 77528  | 2.7  | 1.45E-03 | transcription_start_site | + | 79686  | 79686  | -2291 | 26719 | AN6824 |
| 256  | CONTIG113 | 77262  | 77528  | 2.7  | 1.45E-03 | transcription_start_site | + | 79767  | 79767  | -2372 | 26720 | AN6824 |
| 256  | CONTIG113 | 77262  | 77528  | 2.7  | 1.45E-03 | transcription_start_site | + | 79866  | 79866  | -2471 | 26721 | AN6824 |
| 256  | CONTIG113 | 77262  | 77528  | 2.7  | 1.45E-03 | transcription_start_site | + | 80944  | 80944  | -3549 | 26722 | AN6824 |
| 161  | CONTIG113 | 104339 | 104678 | 2.92 | 2.06E-04 | transcription_start_site | - | 100037 | 100037 | -4471 | 26735 | AN6830 |
| 161  | CONTIG113 | 104339 | 104678 | 2.92 | 2.06E-04 | transcription_start_site | - | 99704  | 99704  | -4804 | 26736 | AN6830 |
| 161  | CONTIG113 | 104339 | 104678 | 2.92 | 2.06E-04 | transcription_start_site | - | 103859 | 103859 | -649  | 26739 | AN6831 |
| 161  | CONTIG113 | 104339 | 104678 | 2.92 | 2.06E-04 | transcription_start_site | - | 103727 | 103727 | -781  | 26740 | AN6831 |

|      |           |        |        |      |          |                          |   |        |        |       |       |        |
|------|-----------|--------|--------|------|----------|--------------------------|---|--------|--------|-------|-------|--------|
| 161  | CONTIG113 | 104339 | 104678 | 2.92 | 2.06E-04 | transcription_start_site | - | 102859 | 102859 | -1649 | 26741 | AN6831 |
| 161  | CONTIG113 | 104339 | 104678 | 2.92 | 2.06E-04 | transcription_start_site | - | 102147 | 102147 | -2361 | 26742 | AN6831 |
| 1106 | CONTIG113 | 108001 | 108892 | 1.61 | 4.20E-02 | transcription_start_site | - | 103859 | 103859 | -4587 | 26739 | AN6831 |
| 1106 | CONTIG113 | 108001 | 108892 | 1.61 | 4.20E-02 | transcription_start_site | - | 103727 | 103727 | -4719 | 26740 | AN6831 |
| 161  | CONTIG113 | 104339 | 104678 | 2.92 | 2.06E-04 | transcription_start_site | - | 104386 | 104386 | -122  | 26748 | AN6832 |
| 161  | CONTIG113 | 104339 | 104678 | 2.92 | 2.06E-04 | transcription_start_site | - | 104703 | 104703 | 194   | 26747 | AN6832 |
| 161  | CONTIG113 | 104339 | 104678 | 2.92 | 2.06E-04 | transcription_start_site | - | 104816 | 104816 | 307   | 26746 | AN6832 |
| 1106 | CONTIG113 | 108001 | 108892 | 1.61 | 4.20E-02 | transcription_start_site | - | 107221 | 107221 | -1225 | 26743 | AN6832 |
| 1106 | CONTIG113 | 108001 | 108892 | 1.61 | 4.20E-02 | transcription_start_site | - | 106922 | 106922 | -1524 | 26744 | AN6832 |
| 1106 | CONTIG113 | 108001 | 108892 | 1.61 | 4.20E-02 | transcription_start_site | - | 105820 | 105820 | -2626 | 26745 | AN6832 |
| 1106 | CONTIG113 | 108001 | 108892 | 1.61 | 4.20E-02 | transcription_start_site | - | 104816 | 104816 | -3630 | 26746 | AN6832 |
| 1106 | CONTIG113 | 108001 | 108892 | 1.61 | 4.20E-02 | transcription_start_site | - | 104703 | 104703 | -3743 | 26747 | AN6832 |
| 1106 | CONTIG113 | 108001 | 108892 | 1.61 | 4.20E-02 | transcription_start_site | - | 104386 | 104386 | -4060 | 26748 | AN6832 |
| 162  | CONTIG113 | 113703 | 114066 | 2.92 | 2.06E-04 | transcription_start_site | + | 112959 | 112959 | 925   | 26752 | AN6833 |
| 162  | CONTIG113 | 113703 | 114066 | 2.92 | 2.06E-04 | transcription_start_site | + | 112717 | 112717 | 1167  | 26751 | AN6833 |
| 1106 | CONTIG113 | 108001 | 108892 | 1.61 | 4.20E-02 | transcription_start_site | + | 112307 | 112307 | -3860 | 26749 | AN6833 |
| 1106 | CONTIG113 | 108001 | 108892 | 1.61 | 4.20E-02 | transcription_start_site | + | 112524 | 112524 | -4077 | 26750 | AN6833 |
| 1106 | CONTIG113 | 108001 | 108892 | 1.61 | 4.20E-02 | transcription_start_site | + | 112717 | 112717 | -4270 | 26751 | AN6833 |
| 1106 | CONTIG113 | 108001 | 108892 | 1.61 | 4.20E-02 | transcription_start_site | + | 112959 | 112959 | -4512 | 26752 | AN6833 |
| 162  | CONTIG113 | 113703 | 114066 | 2.92 | 2.06E-04 | transcription_start_site | - | 114916 | 114916 | 1031  | 26755 | AN6834 |
| 312  | CONTIG113 | 115812 | 116226 | 2.61 | 1.77E-03 | transcription_start_site | - | 115850 | 115850 | -169  | 26753 | AN6834 |
| 312  | CONTIG113 | 115812 | 116226 | 2.61 | 1.77E-03 | transcription_start_site | - | 115235 | 115235 | -784  | 26754 | AN6834 |
| 312  | CONTIG113 | 115812 | 116226 | 2.61 | 1.77E-03 | transcription_start_site | - | 114916 | 114916 | -1103 | 26755 | AN6834 |
| 1069 | CONTIG113 | 123527 | 123876 | 1.65 | 3.70E-02 | transcription_start_site | - | 120938 | 120938 | -2763 | 26756 | AN6835 |
| 1105 | CONTIG113 | 121052 | 121401 | 1.61 | 2.07E-02 | transcription_start_site | - | 120938 | 120938 | -288  | 26756 | AN6835 |
| 1105 | CONTIG113 | 121052 | 121401 | 1.61 | 2.07E-02 | transcription_start_site | - | 118518 | 118518 | -2708 | 26757 | AN6835 |
| 1105 | CONTIG113 | 121052 | 121401 | 1.61 | 2.07E-02 | transcription_start_site | - | 118266 | 118266 | -2960 | 26758 | AN6835 |
| 1069 | CONTIG113 | 123527 | 123876 | 1.65 | 3.70E-02 | transcription_start_site | - | 123511 | 123511 | -190  | 26759 | AN6836 |
| 1069 | CONTIG113 | 123527 | 123876 | 1.65 | 3.70E-02 | transcription_start_site | - | 123265 | 123265 | -436  | 26760 | AN6836 |
| 1069 | CONTIG113 | 123527 | 123876 | 1.65 | 3.70E-02 | transcription_start_site | - | 122769 | 122769 | -932  | 26761 | AN6836 |
| 1720 | CONTIG113 | 128032 | 128529 | 1.13 | 1.54E-01 | transcription_start_site | - | 123511 | 123511 | -4769 | 26759 | AN6836 |
| 1720 | CONTIG113 | 128032 | 128529 | 1.13 | 1.54E-01 | transcription_start_site | - | 123265 | 123265 | -5015 | 26760 | AN6836 |
| 1720 | CONTIG113 | 128032 | 128529 | 1.13 | 1.54E-01 | transcription_start_site | - | 127342 | 127342 | -938  | 26762 | AN6837 |
| 1720 | CONTIG113 | 128032 | 128529 | 1.13 | 1.54E-01 | transcription_start_site | - | 126710 | 126710 | -1570 | 26763 | AN6837 |
| 1720 | CONTIG113 | 128032 | 128529 | 1.13 | 1.54E-01 | transcription_start_site | - | 126618 | 126618 | -1662 | 26764 | AN6837 |
| 1720 | CONTIG113 | 128032 | 128529 | 1.13 | 1.54E-01 | transcription_start_site | + | 128981 | 128981 | -700  | 26765 | AN6838 |
| 1720 | CONTIG113 | 128032 | 128529 | 1.13 | 1.54E-01 | transcription_start_site | + | 129044 | 129044 | -763  | 26766 | AN6838 |
| 1720 | CONTIG113 | 128032 | 128529 | 1.13 | 1.54E-01 | transcription_start_site | + | 129128 | 129128 | -847  | 26767 | AN6838 |
| 1720 | CONTIG113 | 128032 | 128529 | 1.13 | 1.54E-01 | transcription_start_site | + | 129204 | 129204 | -923  | 26768 | AN6838 |
| 1720 | CONTIG113 | 128032 | 128529 | 1.13 | 1.54E-01 | transcription_start_site | + | 129295 | 129295 | -1014 | 26769 | AN6838 |
| 1720 | CONTIG113 | 128032 | 128529 | 1.13 | 1.54E-01 | transcription_start_site | + | 130228 | 130228 | -1947 | 26770 | AN6838 |
| 1720 | CONTIG113 | 128032 | 128529 | 1.13 | 1.54E-01 | transcription_start_site | + | 131116 | 131116 | -2835 | 26771 | AN6839 |
| 1720 | CONTIG113 | 128032 | 128529 | 1.13 | 1.54E-01 | transcription_start_site | + | 132286 | 132286 | -4005 | 26772 | AN6839 |
| 605  | CONTIG113 | 153378 | 153976 | 2.18 | 3.99E-03 | transcription_start_site | - | 149173 | 149173 | -4504 | 26797 | AN6847 |
| 605  | CONTIG113 | 153378 | 153976 | 2.18 | 3.99E-03 | transcription_start_site | - | 148952 | 148952 | -4725 | 26798 | AN6847 |
| 605  | CONTIG113 | 153378 | 153976 | 2.18 | 3.99E-03 | transcription_start_site | - | 152935 | 152935 | -742  | 26801 | AN6849 |
| 605  | CONTIG113 | 153378 | 153976 | 2.18 | 3.99E-03 | transcription_start_site | - | 154756 | 154756 | 1079  | 26803 | AN6850 |
| 1152 | CONTIG113 | 161038 | 161389 | 1.57 | 2.30E-02 | transcription_start_site | - | 156349 | 156349 | -4864 | 26802 | AN6850 |
| 1398 | CONTIG113 | 173930 | 174666 | 1.35 | 4.73E-02 | transcription_start_site | - | 173835 | 173835 | -463  | 26814 | AN6857 |
| 1398 | CONTIG113 | 173930 | 174666 | 1.35 | 4.73E-02 | transcription_start_site | + | 174915 | 174915 | -617  | 26815 | AN6858 |
| 1398 | CONTIG113 | 173930 | 174666 | 1.35 | 4.73E-02 | transcription_start_site | + | 175221 | 175221 | -923  | 26816 | AN6858 |
| 1398 | CONTIG113 | 173930 | 174666 | 1.35 | 4.73E-02 | transcription_start_site | + | 176158 | 176158 | -1860 | 26817 | AN6858 |
| 82   | CONTIG113 | 180303 | 180742 | 3.14 | 0.00E+00 | transcription_start_site | + | 181917 | 181917 | -1394 | 26818 | AN6859 |
| 82   | CONTIG113 | 180303 | 180742 | 3.14 | 0.00E+00 | transcription_start_site | + | 182445 | 182445 | -1922 | 26819 | AN6859 |
| 238  | CONTIG113 | 187055 | 187334 | 2.74 | 1.09E-03 | transcription_start_site | - | 183867 | 183867 | -3327 | 26820 | AN6860 |
| 238  | CONTIG113 | 187055 | 187334 | 2.74 | 1.09E-03 | transcription_start_site | - | 183713 | 183713 | -3481 | 26821 | AN6860 |
| 238  | CONTIG113 | 187055 | 187334 | 2.74 | 1.09E-03 | transcription_start_site | - | 183625 | 183625 | -3569 | 26822 | AN6860 |

|      |           |        |        |      |          |                          |   |        |        |       |       |        |
|------|-----------|--------|--------|------|----------|--------------------------|---|--------|--------|-------|-------|--------|
| 476  | CONTIG113 | 184285 | 184644 | 2.35 | 2.65E-03 | transcription_start_site | - | 183867 | 183867 | -597  | 26820 | AN6860 |
| 476  | CONTIG113 | 184285 | 184644 | 2.35 | 2.65E-03 | transcription_start_site | - | 183713 | 183713 | -751  | 26821 | AN6860 |
| 476  | CONTIG113 | 184285 | 184644 | 2.35 | 2.65E-03 | transcription_start_site | - | 183625 | 183625 | -839  | 26822 | AN6860 |
| 238  | CONTIG113 | 187055 | 187334 | 2.74 | 1.09E-03 | transcription_start_site | + | 187065 | 187065 | 129   | 26825 | AN6861 |
| 238  | CONTIG113 | 187055 | 187334 | 2.74 | 1.09E-03 | transcription_start_site | + | 186310 | 186310 | 884   | 26824 | AN6861 |
| 238  | CONTIG113 | 187055 | 187334 | 2.74 | 1.09E-03 | transcription_start_site | + | 186058 | 186058 | 1136  | 26823 | AN6861 |
| 476  | CONTIG113 | 184285 | 184644 | 2.35 | 2.65E-03 | transcription_start_site | + | 186058 | 186058 | -1593 | 26823 | AN6861 |
| 476  | CONTIG113 | 184285 | 184644 | 2.35 | 2.65E-03 | transcription_start_site | + | 186310 | 186310 | -1845 | 26824 | AN6861 |
| 476  | CONTIG113 | 184285 | 184644 | 2.35 | 2.65E-03 | transcription_start_site | + | 187065 | 187065 | -2600 | 26825 | AN6861 |
| 238  | CONTIG113 | 187055 | 187334 | 2.74 | 1.09E-03 | transcription_start_site | + | 187495 | 187495 | -300  | 26826 | AN6862 |
| 476  | CONTIG113 | 184285 | 184644 | 2.35 | 2.65E-03 | transcription_start_site | + | 187495 | 187495 | -3030 | 26826 | AN6862 |
| 238  | CONTIG113 | 187055 | 187334 | 2.74 | 1.09E-03 | transcription_start_site | + | 188620 | 188620 | -1425 | 26827 | AN6863 |
| 238  | CONTIG113 | 187055 | 187334 | 2.74 | 1.09E-03 | transcription_start_site | + | 189030 | 189030 | -1835 | 26828 | AN6863 |
| 476  | CONTIG113 | 184285 | 184644 | 2.35 | 2.65E-03 | transcription_start_site | + | 188620 | 188620 | -4155 | 26827 | AN6863 |
| 476  | CONTIG113 | 184285 | 184644 | 2.35 | 2.65E-03 | transcription_start_site | + | 189030 | 189030 | -4565 | 26828 | AN6863 |
| 238  | CONTIG113 | 187055 | 187334 | 2.74 | 1.09E-03 | transcription_start_site | + | 191087 | 191087 | -3892 | 26829 | AN6864 |
| 238  | CONTIG113 | 187055 | 187334 | 2.74 | 1.09E-03 | transcription_start_site | + | 191763 | 191763 | -4568 | 26830 | AN6864 |
| 1210 | CONTIG113 | 223812 | 224076 | 1.52 | 5.36E-02 | transcription_start_site | - | 222840 | 222840 | -1104 | 26860 | AN6875 |
| 1210 | CONTIG113 | 223812 | 224076 | 1.52 | 5.36E-02 | transcription_start_site | - | 222351 | 222351 | -1593 | 26861 | AN6875 |
| 1210 | CONTIG113 | 223812 | 224076 | 1.52 | 5.36E-02 | transcription_start_site | - | 222134 | 222134 | -1810 | 26862 | AN6875 |
| 1210 | CONTIG113 | 223812 | 224076 | 1.52 | 5.36E-02 | transcription_start_site | + | 228453 | 228453 | -4509 | 26864 | AN6876 |
| 1210 | CONTIG113 | 223812 | 224076 | 1.52 | 5.36E-02 | transcription_start_site | + | 228619 | 228619 | -4675 | 26865 | AN6876 |
| 1845 | CONTIG113 | 248046 | 248380 | 1.05 | 1.97E-01 | transcription_start_site | - | 248083 | 248083 | -130  | 26879 | AN6881 |
| 1845 | CONTIG113 | 248046 | 248380 | 1.05 | 1.97E-01 | transcription_start_site | - | 247752 | 247752 | -461  | 26880 | AN6881 |
| 1845 | CONTIG113 | 248046 | 248380 | 1.05 | 1.97E-01 | transcription_start_site | - | 248707 | 248707 | 494   | 26884 | AN6882 |
| 1845 | CONTIG113 | 248046 | 248380 | 1.05 | 1.97E-01 | transcription_start_site | - | 248769 | 248769 | 556   | 26883 | AN6882 |
| 1845 | CONTIG113 | 248046 | 248380 | 1.05 | 1.97E-01 | transcription_start_site | + | 250596 | 250596 | -2383 | 26885 | AN6883 |
| 1845 | CONTIG113 | 248046 | 248380 | 1.05 | 1.97E-01 | transcription_start_site | + | 250844 | 250844 | -2631 | 26886 | AN6883 |
| 1845 | CONTIG113 | 248046 | 248380 | 1.05 | 1.97E-01 | transcription_start_site | + | 250887 | 250887 | -2674 | 26887 | AN6883 |
| 1845 | CONTIG113 | 248046 | 248380 | 1.05 | 1.97E-01 | transcription_start_site | + | 251137 | 251137 | -2924 | 26888 | AN6883 |
| 1845 | CONTIG113 | 248046 | 248380 | 1.05 | 1.97E-01 | transcription_start_site | + | 251503 | 251503 | -3290 | 26889 | AN6883 |
| 1845 | CONTIG113 | 248046 | 248380 | 1.05 | 1.97E-01 | transcription_start_site | + | 252171 | 252171 | -3958 | 26890 | AN6883 |
| 1845 | CONTIG113 | 248046 | 248380 | 1.05 | 1.97E-01 | transcription_start_site | + | 253170 | 253170 | -4957 | 26891 | AN6884 |
| 750  | CONTIG113 | 279385 | 279729 | 2    | 1.37E-02 | transcription_start_site | - | 278326 | 278326 | -1231 | 26914 | AN6892 |
| 750  | CONTIG113 | 279385 | 279729 | 2    | 1.37E-02 | transcription_start_site | - | 276998 | 276998 | -2559 | 26915 | AN6892 |
| 750  | CONTIG113 | 279385 | 279729 | 2    | 1.37E-02 | transcription_start_site | + | 280228 | 280228 | -671  | 26916 | AN6893 |
| 750  | CONTIG113 | 279385 | 279729 | 2    | 1.37E-02 | transcription_start_site | + | 280425 | 280425 | -868  | 26917 | AN6893 |
| 750  | CONTIG113 | 279385 | 279729 | 2    | 1.37E-02 | transcription_start_site | + | 282217 | 282217 | -2660 | 26918 | AN6893 |
| 750  | CONTIG113 | 279385 | 279729 | 2    | 1.37E-02 | transcription_start_site | + | 282826 | 282826 | -3269 | 26919 | AN6894 |
| 750  | CONTIG113 | 279385 | 279729 | 2    | 1.37E-02 | transcription_start_site | + | 282888 | 282888 | -3331 | 26920 | AN6894 |
| 750  | CONTIG113 | 279385 | 279729 | 2    | 1.37E-02 | transcription_start_site | + | 282974 | 282974 | -3417 | 26921 | AN6894 |
| 750  | CONTIG113 | 279385 | 279729 | 2    | 1.37E-02 | transcription_start_site | + | 284238 | 284238 | -4681 | 26922 | AN6894 |
| 1402 | CONTIG113 | 300992 | 301256 | 1.35 | 8.63E-02 | transcription_start_site | - | 296254 | 296254 | -4870 | 26933 | AN6897 |
| 1402 | CONTIG113 | 300992 | 301256 | 1.35 | 8.63E-02 | transcription_start_site | + | 301387 | 301387 | -263  | 26942 | AN6900 |
| 1402 | CONTIG113 | 300992 | 301256 | 1.35 | 8.63E-02 | transcription_start_site | + | 301546 | 301546 | -422  | 26943 | AN6900 |
| 1402 | CONTIG113 | 300992 | 301256 | 1.35 | 8.63E-02 | transcription_start_site | + | 301881 | 301881 | -757  | 26944 | AN6900 |
| 1402 | CONTIG113 | 300992 | 301256 | 1.35 | 8.63E-02 | transcription_start_site | + | 302053 | 302053 | -929  | 26945 | AN6900 |
| 1402 | CONTIG113 | 300992 | 301256 | 1.35 | 8.63E-02 | transcription_start_site | + | 302228 | 302228 | -1104 | 26946 | AN6900 |
| 1402 | CONTIG113 | 300992 | 301256 | 1.35 | 8.63E-02 | transcription_start_site | + | 302503 | 302503 | -1379 | 26947 | AN6900 |
| 1402 | CONTIG113 | 300992 | 301256 | 1.35 | 8.63E-02 | transcription_start_site | + | 304578 | 304578 | -3454 | 26951 | AN6902 |
| 1402 | CONTIG113 | 300992 | 301256 | 1.35 | 8.63E-02 | transcription_start_site | + | 304845 | 304845 | -3721 | 26952 | AN6902 |
| 2334 | CONTIG114 | 2401   | 3430   | 0.6  | 1.15E-01 | transcription_start_site | + | 4146   | 4146   | -1230 | 26967 | AN6908 |
| 2334 | CONTIG114 | 2401   | 3430   | 0.6  | 1.15E-01 | transcription_start_site | + | 5266   | 5266   | -2350 | 26968 | AN6908 |
| 2334 | CONTIG114 | 2401   | 3430   | 0.6  | 1.15E-01 | transcription_start_site | + | 5510   | 5510   | -2594 | 26969 | AN6908 |
| 2334 | CONTIG114 | 2401   | 3430   | 0.6  | 1.15E-01 | transcription_start_site | + | 7152   | 7152   | -4236 | 26970 | AN6909 |
| 2334 | CONTIG114 | 2401   | 3430   | 0.6  | 1.15E-01 | transcription_start_site | + | 7281   | 7281   | -4365 | 26971 | AN6909 |
| 2334 | CONTIG114 | 2401   | 3430   | 0.6  | 1.15E-01 | transcription_start_site | + | 7472   | 7472   | -4556 | 26972 | AN6909 |



|      |           |       |       |      |          |                          |   |        |        |       |       |        |
|------|-----------|-------|-------|------|----------|--------------------------|---|--------|--------|-------|-------|--------|
| 2360 | CONTIG114 | 21226 | 22256 | 0.5  | 1.64E-01 | transcription_start_site | - | 16610  | 16610  | -5131 | 26990 | AN6914 |
| 2360 | CONTIG114 | 21226 | 22256 | 0.5  | 1.64E-01 | transcription_start_site | - | 16533  | 16533  | -5208 | 26991 | AN6914 |
| 2048 | CONTIG114 | 22281 | 23605 | 0.91 | 2.19E-03 | transcription_start_site | - | 22884  | 22884  | -59   | 27000 | AN6916 |
| 2048 | CONTIG114 | 22281 | 23605 | 0.91 | 2.19E-03 | transcription_start_site | - | 22771  | 22771  | -172  | 27001 | AN6916 |
| 2048 | CONTIG114 | 22281 | 23605 | 0.91 | 2.19E-03 | transcription_start_site | - | 22702  | 22702  | -241  | 27002 | AN6916 |
| 2048 | CONTIG114 | 22281 | 23605 | 0.91 | 2.19E-03 | transcription_start_site | - | 22526  | 22526  | -417  | 27003 | AN6916 |
| 2048 | CONTIG114 | 22281 | 23605 | 0.91 | 2.19E-03 | transcription_start_site | - | 23481  | 23481  | 538   | 26999 | AN6916 |
| 2048 | CONTIG114 | 22281 | 23605 | 0.91 | 2.19E-03 | transcription_start_site | - | 22192  | 22192  | -751  | 27004 | AN6916 |
| 2048 | CONTIG114 | 22281 | 23605 | 0.91 | 2.19E-03 | transcription_start_site | - | 23770  | 23770  | 827   | 26998 | AN6916 |
| 2048 | CONTIG114 | 22281 | 23605 | 0.91 | 2.19E-03 | transcription_start_site | - | 23878  | 23878  | 935   | 26997 | AN6916 |
| 2048 | CONTIG114 | 22281 | 23605 | 0.91 | 2.19E-03 | transcription_start_site | - | 21933  | 21933  | -1010 | 27005 | AN6916 |
| 2298 | CONTIG114 | 23871 | 24211 | 0.67 | 1.22E-01 | transcription_start_site | - | 23878  | 23878  | -163  | 26997 | AN6916 |
| 2298 | CONTIG114 | 23871 | 24211 | 0.67 | 1.22E-01 | transcription_start_site | - | 23770  | 23770  | -271  | 26998 | AN6916 |
| 2298 | CONTIG114 | 23871 | 24211 | 0.67 | 1.22E-01 | transcription_start_site | - | 23481  | 23481  | -560  | 26999 | AN6916 |
| 2298 | CONTIG114 | 23871 | 24211 | 0.67 | 1.22E-01 | transcription_start_site | - | 24629  | 24629  | 588   | 26996 | AN6916 |
| 2298 | CONTIG114 | 23871 | 24211 | 0.67 | 1.22E-01 | transcription_start_site | - | 22884  | 22884  | -1157 | 27000 | AN6916 |
| 2298 | CONTIG114 | 23871 | 24211 | 0.67 | 1.22E-01 | transcription_start_site | - | 22771  | 22771  | -1270 | 27001 | AN6916 |
| 2298 | CONTIG114 | 23871 | 24211 | 0.67 | 1.22E-01 | transcription_start_site | - | 22702  | 22702  | -1339 | 27002 | AN6916 |
| 2298 | CONTIG114 | 23871 | 24211 | 0.67 | 1.22E-01 | transcription_start_site | - | 22526  | 22526  | -1515 | 27003 | AN6916 |
| 2298 | CONTIG114 | 23871 | 24211 | 0.67 | 1.22E-01 | transcription_start_site | - | 22192  | 22192  | -1849 | 27004 | AN6916 |
| 2298 | CONTIG114 | 23871 | 24211 | 0.67 | 1.22E-01 | transcription_start_site | - | 21933  | 21933  | -2108 | 27005 | AN6916 |
| 2360 | CONTIG114 | 21226 | 22256 | 0.5  | 1.64E-01 | transcription_start_site | - | 21933  | 21933  | 192   | 27005 | AN6916 |
| 2360 | CONTIG114 | 21226 | 22256 | 0.5  | 1.64E-01 | transcription_start_site | - | 22192  | 22192  | 451   | 27004 | AN6916 |
| 2360 | CONTIG114 | 21226 | 22256 | 0.5  | 1.64E-01 | transcription_start_site | - | 22526  | 22526  | 785   | 27003 | AN6916 |
| 2360 | CONTIG114 | 21226 | 22256 | 0.5  | 1.64E-01 | transcription_start_site | - | 22702  | 22702  | 961   | 27002 | AN6916 |
| 2360 | CONTIG114 | 21226 | 22256 | 0.5  | 1.64E-01 | transcription_start_site | - | 22771  | 22771  | 1030  | 27001 | AN6916 |
| 2360 | CONTIG114 | 21226 | 22256 | 0.5  | 1.64E-01 | transcription_start_site | - | 22884  | 22884  | 1143  | 27000 | AN6916 |
| 258  | CONTIG115 | 18301 | 19251 | 2.69 | 0.00E+00 | transcription_start_site | + | 19610  | 19610  | -834  | 27037 | AN6924 |
| 258  | CONTIG115 | 18301 | 19251 | 2.69 | 0.00E+00 | transcription_start_site | + | 19800  | 19800  | -1024 | 27038 | AN6924 |
| 258  | CONTIG115 | 18301 | 19251 | 2.69 | 0.00E+00 | transcription_start_site | + | 19910  | 19910  | -1134 | 27039 | AN6924 |
| 258  | CONTIG115 | 18301 | 19251 | 2.69 | 0.00E+00 | transcription_start_site | + | 20144  | 20144  | -1368 | 27040 | AN6924 |
| 258  | CONTIG115 | 18301 | 19251 | 2.69 | 0.00E+00 | transcription_start_site | + | 20406  | 20406  | -1630 | 27041 | AN6924 |
| 528  | CONTIG115 | 95557 | 95916 | 2.27 | 0.00E+00 | transcription_start_site | + | 95888  | 95888  | -151  | 27123 | AN6948 |
| 528  | CONTIG115 | 95557 | 95916 | 2.27 | 0.00E+00 | transcription_start_site | + | 96746  | 96746  | -1009 | 27124 | AN6948 |
| 528  | CONTIG115 | 95557 | 95916 | 2.27 | 0.00E+00 | transcription_start_site | + | 99615  | 99615  | -3878 | 27125 | AN6949 |
| 528  | CONTIG115 | 95557 | 95916 | 2.27 | 0.00E+00 | transcription_start_site | + | 99800  | 99800  | -4063 | 27126 | AN6949 |
| 528  | CONTIG115 | 95557 | 95916 | 2.27 | 0.00E+00 | transcription_start_site | + | 100134 | 100134 | -4397 | 27127 | AN6949 |
| 528  | CONTIG115 | 95557 | 95916 | 2.27 | 0.00E+00 | transcription_start_site | + | 100643 | 100643 | -4906 | 27128 | AN6949 |
| 183  | CONTIG116 | 27090 | 27367 | 2.87 | 0.00E+00 | transcription_start_site | - | 23005  | 23005  | -4223 | 27171 | AN6961 |
| 183  | CONTIG116 | 27090 | 27367 | 2.87 | 0.00E+00 | transcription_start_site | - | 26206  | 26206  | -1022 | 27172 | AN6962 |
| 183  | CONTIG116 | 27090 | 27367 | 2.87 | 0.00E+00 | transcription_start_site | - | 25920  | 25920  | -1308 | 27173 | AN6962 |
| 183  | CONTIG116 | 27090 | 27367 | 2.87 | 0.00E+00 | transcription_start_site | - | 25639  | 25639  | -1589 | 27174 | AN6962 |
| 977  | CONTIG116 | 30392 | 30652 | 1.74 | 9.96E-03 | transcription_start_site | - | 26206  | 26206  | -4316 | 27172 | AN6962 |
| 977  | CONTIG116 | 30392 | 30652 | 1.74 | 9.96E-03 | transcription_start_site | - | 25920  | 25920  | -4602 | 27173 | AN6962 |
| 977  | CONTIG116 | 30392 | 30652 | 1.74 | 9.96E-03 | transcription_start_site | - | 25639  | 25639  | -4883 | 27174 | AN6962 |
| 2034 | CONTIG116 | 28812 | 29376 | 0.92 | 9.90E-02 | transcription_start_site | - | 26206  | 26206  | -2888 | 27172 | AN6962 |
| 2034 | CONTIG116 | 28812 | 29376 | 0.92 | 9.90E-02 | transcription_start_site | - | 25920  | 25920  | -3174 | 27173 | AN6962 |
| 2034 | CONTIG116 | 28812 | 29376 | 0.92 | 9.90E-02 | transcription_start_site | - | 25639  | 25639  | -3455 | 27174 | AN6962 |
| 183  | CONTIG116 | 27090 | 27367 | 2.87 | 0.00E+00 | transcription_start_site | + | 27657  | 27657  | -428  | 27175 | AN6963 |
| 183  | CONTIG116 | 27090 | 27367 | 2.87 | 0.00E+00 | transcription_start_site | + | 27948  | 27948  | -719  | 27176 | AN6963 |
| 183  | CONTIG116 | 27090 | 27367 | 2.87 | 0.00E+00 | transcription_start_site | + | 28820  | 28820  | -1591 | 27177 | AN6963 |
| 2034 | CONTIG116 | 28812 | 29376 | 0.92 | 9.90E-02 | transcription_start_site | + | 28820  | 28820  | 274   | 27177 | AN6963 |
| 2034 | CONTIG116 | 28812 | 29376 | 0.92 | 9.90E-02 | transcription_start_site | + | 27948  | 27948  | 1146  | 27176 | AN6963 |
| 977  | CONTIG116 | 30392 | 30652 | 1.74 | 9.96E-03 | transcription_start_site | - | 31384  | 31384  | 862   | 27178 | AN6964 |
| 997  | CONTIG117 | 6458  | 6741  | 1.72 | 2.05E-02 | transcription_start_site | - | 6352   | 6352   | -247  | 27202 | AN6973 |
| 997  | CONTIG117 | 6458  | 6741  | 1.72 | 2.05E-02 | transcription_start_site | - | 6273   | 6273   | -326  | 27203 | AN6973 |
| 997  | CONTIG117 | 6458  | 6741  | 1.72 | 2.05E-02 | transcription_start_site | - | 5972   | 5972   | -627  | 27204 | AN6973 |

|      |           |        |        |      |          |                          |   |        |        |       |       |        |
|------|-----------|--------|--------|------|----------|--------------------------|---|--------|--------|-------|-------|--------|
| 997  | CONTIG117 | 6458   | 6741   | 1.72 | 2.05E-02 | transcription_start_site | - | 5826   | 5826   | -773  | 27205 | AN6973 |
| 997  | CONTIG117 | 6458   | 6741   | 1.72 | 2.05E-02 | transcription_start_site | + | 10913  | 10913  | -4313 | 27206 | AN6974 |
| 997  | CONTIG117 | 6458   | 6741   | 1.72 | 2.05E-02 | transcription_start_site | + | 11002  | 11002  | -4402 | 27207 | AN6974 |
| 997  | CONTIG117 | 6458   | 6741   | 1.72 | 2.05E-02 | transcription_start_site | + | 11331  | 11331  | -4731 | 27208 | AN6974 |
| 789  | CONTIG117 | 39976  | 40481  | 1.96 | 9.96E-03 | transcription_start_site | - | 38265  | 38265  | -1963 | 27246 | AN6980 |
| 789  | CONTIG117 | 39976  | 40481  | 1.96 | 9.96E-03 | transcription_start_site | - | 37737  | 37737  | -2491 | 27247 | AN6980 |
| 789  | CONTIG117 | 39976  | 40481  | 1.96 | 9.96E-03 | transcription_start_site | - | 37040  | 37040  | -3188 | 27248 | AN6980 |
| 789  | CONTIG117 | 39976  | 40481  | 1.96 | 9.96E-03 | transcription_start_site | - | 36010  | 36010  | -4218 | 27249 | AN6980 |
| 789  | CONTIG117 | 39976  | 40481  | 1.96 | 9.96E-03 | transcription_start_site | - | 35201  | 35201  | -5027 | 27250 | AN6980 |
| 789  | CONTIG117 | 39976  | 40481  | 1.96 | 9.96E-03 | transcription_start_site | + | 40816  | 40816  | -587  | 27251 | AN6982 |
| 789  | CONTIG117 | 39976  | 40481  | 1.96 | 9.96E-03 | transcription_start_site | + | 41367  | 41367  | -1138 | 27252 | AN6982 |
| 789  | CONTIG117 | 39976  | 40481  | 1.96 | 9.96E-03 | transcription_start_site | + | 42331  | 42331  | -2102 | 27253 | AN6982 |
| 789  | CONTIG117 | 39976  | 40481  | 1.96 | 9.96E-03 | transcription_start_site | + | 43432  | 43432  | -3203 | 27254 | AN6983 |
| 996  | CONTIG117 | 59269  | 59678  | 1.72 | 1.81E-03 | transcription_start_site | - | 60650  | 60650  | 1176  | 27268 | AN6988 |
| 1911 | CONTIG117 | 74928  | 75220  | 1    | 1.76E-01 | transcription_start_site | - | 74807  | 74807  | -267  | 27272 | AN6993 |
| 1911 | CONTIG117 | 74928  | 75220  | 1    | 1.76E-01 | transcription_start_site | - | 74640  | 74640  | -434  | 27273 | AN6993 |
| 1911 | CONTIG117 | 74928  | 75220  | 1    | 1.76E-01 | transcription_start_site | - | 74484  | 74484  | -590  | 27274 | AN6993 |
| 1911 | CONTIG117 | 74928  | 75220  | 1    | 1.76E-01 | transcription_start_site | - | 74121  | 74121  | -953  | 27275 | AN6993 |
| 1911 | CONTIG117 | 74928  | 75220  | 1    | 1.76E-01 | transcription_start_site | - | 73959  | 73959  | -1115 | 27276 | AN6993 |
| 1911 | CONTIG117 | 74928  | 75220  | 1    | 1.76E-01 | transcription_start_site | + | 75260  | 75260  | -186  | 27277 | AN6994 |
| 1911 | CONTIG117 | 74928  | 75220  | 1    | 1.76E-01 | transcription_start_site | + | 75479  | 75479  | -405  | 27278 | AN6994 |
| 1911 | CONTIG117 | 74928  | 75220  | 1    | 1.76E-01 | transcription_start_site | + | 76244  | 76244  | -1170 | 27279 | AN6994 |
| 1911 | CONTIG117 | 74928  | 75220  | 1    | 1.76E-01 | transcription_start_site | + | 79404  | 79404  | -4330 | 27283 | AN6996 |
| 1911 | CONTIG117 | 74928  | 75220  | 1    | 1.76E-01 | transcription_start_site | + | 79986  | 79986  | -4912 | 27284 | AN6996 |
| 1542 | CONTIG117 | 98270  | 98619  | 1.24 | 8.63E-02 | transcription_start_site | - | 95748  | 95748  | -2696 | 27307 | AN7003 |
| 1542 | CONTIG117 | 98270  | 98619  | 1.24 | 8.63E-02 | transcription_start_site | - | 95638  | 95638  | -2806 | 27308 | AN7003 |
| 1542 | CONTIG117 | 98270  | 98619  | 1.24 | 8.63E-02 | transcription_start_site | - | 95484  | 95484  | -2960 | 27309 | AN7003 |
| 1542 | CONTIG117 | 98270  | 98619  | 1.24 | 8.63E-02 | transcription_start_site | - | 95302  | 95302  | -3142 | 27310 | AN7003 |
| 1542 | CONTIG117 | 98270  | 98619  | 1.24 | 8.63E-02 | transcription_start_site | - | 95091  | 95091  | -3353 | 27311 | AN7003 |
| 1542 | CONTIG117 | 98270  | 98619  | 1.24 | 8.63E-02 | transcription_start_site | - | 98638  | 98638  | 193   | 27312 | AN7004 |
| 1542 | CONTIG117 | 98270  | 98619  | 1.24 | 8.63E-02 | transcription_start_site | - | 98082  | 98082  | -362  | 27313 | AN7004 |
| 1542 | CONTIG117 | 98270  | 98619  | 1.24 | 8.63E-02 | transcription_start_site | - | 97956  | 97956  | -488  | 27314 | AN7004 |
| 1542 | CONTIG117 | 98270  | 98619  | 1.24 | 8.63E-02 | transcription_start_site | + | 99437  | 99437  | -992  | 27315 | AN7005 |
| 556  | CONTIG117 | 120756 | 121945 | 2.24 | 0.00E+00 | transcription_start_site | - | 118295 | 118295 | -3055 | 27332 | AN7012 |
| 556  | CONTIG117 | 120756 | 121945 | 2.24 | 0.00E+00 | transcription_start_site | - | 117493 | 117493 | -3857 | 27333 | AN7012 |
| 556  | CONTIG117 | 120756 | 121945 | 2.24 | 0.00E+00 | transcription_start_site | - | 116827 | 116827 | -4523 | 27334 | AN7012 |
| 556  | CONTIG117 | 120756 | 121945 | 2.24 | 0.00E+00 | transcription_start_site | - | 116394 | 116394 | -4956 | 27335 | AN7012 |
| 556  | CONTIG117 | 120756 | 121945 | 2.24 | 0.00E+00 | transcription_start_site | + | 126275 | 126275 | -4924 | 27343 | AN7014 |
| 556  | CONTIG117 | 120756 | 121945 | 2.24 | 0.00E+00 | transcription_start_site | + | 126565 | 126565 | -5214 | 27344 | AN7014 |
| 556  | CONTIG117 | 120756 | 121945 | 2.24 | 0.00E+00 | transcription_start_site | + | 126715 | 126715 | -5364 | 27345 | AN7014 |
| 621  | CONTIG117 | 139291 | 139630 | 2.16 | 2.65E-03 | transcription_start_site | - | 138884 | 138884 | -576  | 27355 | AN7017 |
| 1543 | CONTIG117 | 140251 | 140755 | 1.24 | 8.63E-02 | transcription_start_site | - | 138884 | 138884 | -1619 | 27355 | AN7017 |
| 621  | CONTIG117 | 139291 | 139630 | 2.16 | 2.65E-03 | transcription_start_site | + | 140564 | 140564 | -1103 | 27356 | AN7018 |
| 1543 | CONTIG117 | 140251 | 140755 | 1.24 | 8.63E-02 | transcription_start_site | + | 140564 | 140564 | -61   | 27356 | AN7018 |
| 621  | CONTIG117 | 139291 | 139630 | 2.16 | 2.65E-03 | transcription_start_site | + | 141628 | 141628 | -2167 | 27357 | AN7019 |
| 1543 | CONTIG117 | 140251 | 140755 | 1.24 | 8.63E-02 | transcription_start_site | + | 141628 | 141628 | -1125 | 27357 | AN7019 |
| 406  | CONTIG117 | 152418 | 152918 | 2.44 | 1.62E-03 | transcription_start_site | + | 153628 | 153628 | -960  | 27360 | AN7021 |
| 406  | CONTIG117 | 152418 | 152918 | 2.44 | 1.62E-03 | transcription_start_site | + | 153883 | 153883 | -1215 | 27361 | AN7021 |
| 406  | CONTIG117 | 152418 | 152918 | 2.44 | 1.62E-03 | transcription_start_site | + | 154009 | 154009 | -1341 | 27362 | AN7021 |
| 406  | CONTIG117 | 152418 | 152918 | 2.44 | 1.62E-03 | transcription_start_site | + | 154223 | 154223 | -1555 | 27363 | AN7021 |
| 406  | CONTIG117 | 152418 | 152918 | 2.44 | 1.62E-03 | transcription_start_site | + | 154422 | 154422 | -1754 | 27364 | AN7021 |
| 406  | CONTIG117 | 152418 | 152918 | 2.44 | 1.62E-03 | transcription_start_site | + | 155948 | 155948 | -3280 | 27365 | AN7022 |
| 406  | CONTIG117 | 152418 | 152918 | 2.44 | 1.62E-03 | transcription_start_site | + | 156380 | 156380 | -3712 | 27366 | AN7022 |
| 406  | CONTIG117 | 152418 | 152918 | 2.44 | 1.62E-03 | transcription_start_site | + | 157149 | 157149 | -4481 | 27367 | AN7022 |
| 406  | CONTIG117 | 152418 | 152918 | 2.44 | 1.62E-03 | transcription_start_site | + | 157636 | 157636 | -4968 | 27368 | AN7022 |
| 406  | CONTIG117 | 152418 | 152918 | 2.44 | 1.62E-03 | transcription_start_site | + | 157803 | 157803 | -5135 | 27369 | AN7022 |
| 622  | CONTIG117 | 164028 | 164377 | 2.16 | 5.08E-03 | transcription_start_site | - | 160772 | 160772 | -3430 | 27373 | AN7023 |

|      |           |        |        |      |          |                          |   |        |        |       |       |        |
|------|-----------|--------|--------|------|----------|--------------------------|---|--------|--------|-------|-------|--------|
| 622  | CONTIG117 | 164028 | 164377 | 2.16 | 5.08E-03 | transcription_start_site | - | 160307 | 160307 | -3895 | 27374 | AN7023 |
| 73   | CONTIG117 | 166963 | 167227 | 3.17 | 0.00E+00 | transcription_start_site | - | 162088 | 162088 | -5007 | 27375 | AN7024 |
| 622  | CONTIG117 | 164028 | 164377 | 2.16 | 5.08E-03 | transcription_start_site | - | 162088 | 162088 | -2114 | 27375 | AN7024 |
| 622  | CONTIG117 | 164028 | 164377 | 2.16 | 5.08E-03 | transcription_start_site | - | 161941 | 161941 | -2261 | 27376 | AN7024 |
| 622  | CONTIG117 | 164028 | 164377 | 2.16 | 5.08E-03 | transcription_start_site | - | 161773 | 161773 | -2429 | 27377 | AN7024 |
| 622  | CONTIG117 | 164028 | 164377 | 2.16 | 5.08E-03 | transcription_start_site | + | 164543 | 164543 | -340  | 27378 | AN7025 |
| 622  | CONTIG117 | 164028 | 164377 | 2.16 | 5.08E-03 | transcription_start_site | + | 165046 | 165046 | -843  | 27379 | AN7025 |
| 622  | CONTIG117 | 164028 | 164377 | 2.16 | 5.08E-03 | transcription_start_site | + | 165604 | 165604 | -1401 | 27380 | AN7025 |
| 73   | CONTIG117 | 166963 | 167227 | 3.17 | 0.00E+00 | transcription_start_site | + | 168475 | 168475 | -1380 | 27381 | AN7026 |
| 73   | CONTIG117 | 166963 | 167227 | 3.17 | 0.00E+00 | transcription_start_site | + | 169566 | 169566 | -2471 | 27382 | AN7026 |
| 622  | CONTIG117 | 164028 | 164377 | 2.16 | 5.08E-03 | transcription_start_site | + | 168475 | 168475 | -4272 | 27381 | AN7026 |
| 74   | CONTIG117 | 186002 | 186438 | 3.17 | 0.00E+00 | transcription_start_site | - | 185691 | 185691 | -529  | 27399 | AN7029 |
| 74   | CONTIG117 | 186002 | 186438 | 3.17 | 0.00E+00 | transcription_start_site | - | 184839 | 184839 | -1381 | 27400 | AN7029 |
| 74   | CONTIG117 | 186002 | 186438 | 3.17 | 0.00E+00 | transcription_start_site | - | 184259 | 184259 | -1961 | 27401 | AN7029 |
| 74   | CONTIG117 | 186002 | 186438 | 3.17 | 0.00E+00 | transcription_start_site | - | 183569 | 183569 | -2651 | 27402 | AN7029 |
| 74   | CONTIG117 | 186002 | 186438 | 3.17 | 0.00E+00 | transcription_start_site | - | 183368 | 183368 | -2852 | 27403 | AN7029 |
| 97   | CONTIG117 | 190282 | 190722 | 3.09 | 0.00E+00 | transcription_start_site | - | 185691 | 185691 | -4811 | 27399 | AN7029 |
| 332  | CONTIG117 | 189302 | 190101 | 2.56 | 0.00E+00 | transcription_start_site | - | 185691 | 185691 | -4010 | 27399 | AN7029 |
| 332  | CONTIG117 | 189302 | 190101 | 2.56 | 0.00E+00 | transcription_start_site | - | 184839 | 184839 | -4862 | 27400 | AN7029 |
| 1726 | CONTIG117 | 187212 | 187783 | 1.12 | 1.22E-01 | transcription_start_site | - | 185691 | 185691 | -1806 | 27399 | AN7029 |
| 1726 | CONTIG117 | 187212 | 187783 | 1.12 | 1.22E-01 | transcription_start_site | - | 184839 | 184839 | -2658 | 27400 | AN7029 |
| 1726 | CONTIG117 | 187212 | 187783 | 1.12 | 1.22E-01 | transcription_start_site | - | 184259 | 184259 | -3238 | 27401 | AN7029 |
| 1726 | CONTIG117 | 187212 | 187783 | 1.12 | 1.22E-01 | transcription_start_site | - | 183569 | 183569 | -3928 | 27402 | AN7029 |
| 1726 | CONTIG117 | 187212 | 187783 | 1.12 | 1.22E-01 | transcription_start_site | - | 183368 | 183368 | -4129 | 27403 | AN7029 |
| 97   | CONTIG117 | 190282 | 190722 | 3.09 | 0.00E+00 | transcription_start_site | - | 188827 | 188827 | -1675 | 27404 | AN7030 |
| 97   | CONTIG117 | 190282 | 190722 | 3.09 | 0.00E+00 | transcription_start_site | - | 188696 | 188696 | -1806 | 27405 | AN7030 |
| 97   | CONTIG117 | 190282 | 190722 | 3.09 | 0.00E+00 | transcription_start_site | - | 188420 | 188420 | -2082 | 27406 | AN7030 |
| 97   | CONTIG117 | 190282 | 190722 | 3.09 | 0.00E+00 | transcription_start_site | - | 187596 | 187596 | -2906 | 27407 | AN7030 |
| 332  | CONTIG117 | 189302 | 190101 | 2.56 | 0.00E+00 | transcription_start_site | - | 188827 | 188827 | -874  | 27404 | AN7030 |
| 332  | CONTIG117 | 189302 | 190101 | 2.56 | 0.00E+00 | transcription_start_site | - | 188696 | 188696 | -1005 | 27405 | AN7030 |
| 332  | CONTIG117 | 189302 | 190101 | 2.56 | 0.00E+00 | transcription_start_site | - | 188420 | 188420 | -1281 | 27406 | AN7030 |
| 332  | CONTIG117 | 189302 | 190101 | 2.56 | 0.00E+00 | transcription_start_site | - | 187596 | 187596 | -2105 | 27407 | AN7030 |
| 1726 | CONTIG117 | 187212 | 187783 | 1.12 | 1.22E-01 | transcription_start_site | - | 187596 | 187596 | 98    | 27407 | AN7030 |
| 1726 | CONTIG117 | 187212 | 187783 | 1.12 | 1.22E-01 | transcription_start_site | - | 188420 | 188420 | 922   | 27406 | AN7030 |
| 1726 | CONTIG117 | 187212 | 187783 | 1.12 | 1.22E-01 | transcription_start_site | - | 188696 | 188696 | 1198  | 27405 | AN7030 |
| 97   | CONTIG117 | 190282 | 190722 | 3.09 | 0.00E+00 | transcription_start_site | - | 191473 | 191473 | 971   | 27411 | AN7031 |
| 669  | CONTIG117 | 221196 | 221470 | 2.08 | 7.08E-03 | transcription_start_site | - | 219033 | 219033 | -2300 | 27428 | AN7039 |
| 669  | CONTIG117 | 221196 | 221470 | 2.08 | 7.08E-03 | transcription_start_site | - | 218681 | 218681 | -2652 | 27429 | AN7039 |
| 669  | CONTIG117 | 221196 | 221470 | 2.08 | 7.08E-03 | transcription_start_site | - | 218205 | 218205 | -3128 | 27430 | AN7039 |
| 669  | CONTIG117 | 221196 | 221470 | 2.08 | 7.08E-03 | transcription_start_site | - | 217993 | 217993 | -3340 | 27431 | AN7039 |
| 669  | CONTIG117 | 221196 | 221470 | 2.08 | 7.08E-03 | transcription_start_site | + | 220437 | 220437 | 896   | 27435 | AN7040 |
| 669  | CONTIG117 | 221196 | 221470 | 2.08 | 7.08E-03 | transcription_start_site | + | 223741 | 223741 | -2408 | 27436 | AN7041 |
| 1172 | CONTIG117 | 227935 | 228739 | 1.56 | 3.34E-02 | transcription_start_site | - | 228231 | 228231 | -106  | 27437 | AN7042 |
| 1172 | CONTIG117 | 227935 | 228739 | 1.56 | 3.34E-02 | transcription_start_site | - | 227947 | 227947 | -390  | 27438 | AN7042 |
| 1172 | CONTIG117 | 227935 | 228739 | 1.56 | 3.34E-02 | transcription_start_site | - | 227325 | 227325 | -1012 | 27439 | AN7042 |
| 1172 | CONTIG117 | 227935 | 228739 | 1.56 | 3.34E-02 | transcription_start_site | + | 229889 | 229889 | -1552 | 27440 | AN7043 |
| 1172 | CONTIG117 | 227935 | 228739 | 1.56 | 3.34E-02 | transcription_start_site | + | 230388 | 230388 | -2051 | 27441 | AN7043 |
| 1172 | CONTIG117 | 227935 | 228739 | 1.56 | 3.34E-02 | transcription_start_site | + | 230830 | 230830 | -2493 | 27442 | AN7044 |
| 1172 | CONTIG117 | 227935 | 228739 | 1.56 | 3.34E-02 | transcription_start_site | + | 230943 | 230943 | -2606 | 27443 | AN7044 |
| 1172 | CONTIG117 | 227935 | 228739 | 1.56 | 3.34E-02 | transcription_start_site | + | 231218 | 231218 | -2881 | 27444 | AN7044 |
| 1172 | CONTIG117 | 227935 | 228739 | 1.56 | 3.34E-02 | transcription_start_site | + | 231497 | 231497 | -3160 | 27445 | AN7044 |
| 1172 | CONTIG117 | 227935 | 228739 | 1.56 | 3.34E-02 | transcription_start_site | + | 232133 | 232133 | -3796 | 27446 | AN7044 |
| 1172 | CONTIG117 | 227935 | 228739 | 1.56 | 3.34E-02 | transcription_start_site | + | 233024 | 233024 | -4687 | 27447 | AN7045 |
| 1172 | CONTIG117 | 227935 | 228739 | 1.56 | 3.34E-02 | transcription_start_site | + | 233296 | 233296 | -4959 | 27448 | AN7045 |
| 1172 | CONTIG117 | 227935 | 228739 | 1.56 | 3.34E-02 | transcription_start_site | + | 233438 | 233438 | -5101 | 27449 | AN7045 |
| 1172 | CONTIG117 | 227935 | 228739 | 1.56 | 3.34E-02 | transcription_start_site | + | 233604 | 233604 | -5267 | 27450 | AN7045 |
| 440  | CONTIG117 | 249165 | 249439 | 2.4  | 1.77E-03 | transcription_start_site | + | 249670 | 249670 | -368  | 27468 | AN7050 |

|      |           |        |        |      |          |                          |   |        |        |       |       |        |
|------|-----------|--------|--------|------|----------|--------------------------|---|--------|--------|-------|-------|--------|
| 440  | CONTIG117 | 249165 | 249439 | 2.4  | 1.77E-03 | transcription_start_site | + | 249994 | 249994 | -692  | 27469 | AN7050 |
| 440  | CONTIG117 | 249165 | 249439 | 2.4  | 1.77E-03 | transcription_start_site | + | 250207 | 250207 | -905  | 27470 | AN7050 |
| 440  | CONTIG117 | 249165 | 249439 | 2.4  | 1.77E-03 | transcription_start_site | + | 250327 | 250327 | -1025 | 27471 | AN7050 |
| 440  | CONTIG117 | 249165 | 249439 | 2.4  | 1.77E-03 | transcription_start_site | + | 250511 | 250511 | -1209 | 27472 | AN7050 |
| 440  | CONTIG117 | 249165 | 249439 | 2.4  | 1.77E-03 | transcription_start_site | + | 251435 | 251435 | -2133 | 27473 | AN7050 |
| 440  | CONTIG117 | 249165 | 249439 | 2.4  | 1.77E-03 | transcription_start_site | + | 251915 | 251915 | -2613 | 27474 | AN7050 |
| 440  | CONTIG117 | 249165 | 249439 | 2.4  | 1.77E-03 | transcription_start_site | + | 252147 | 252147 | -2845 | 27475 | AN7050 |
| 440  | CONTIG117 | 249165 | 249439 | 2.4  | 1.77E-03 | transcription_start_site | + | 253184 | 253184 | -3882 | 27476 | AN7050 |
| 1349 | CONTIG117 | 247214 | 247483 | 1.4  | 5.36E-02 | transcription_start_site | + | 249670 | 249670 | -2321 | 27468 | AN7050 |
| 1349 | CONTIG117 | 247214 | 247483 | 1.4  | 5.36E-02 | transcription_start_site | + | 249994 | 249994 | -2645 | 27469 | AN7050 |
| 1349 | CONTIG117 | 247214 | 247483 | 1.4  | 5.36E-02 | transcription_start_site | + | 250207 | 250207 | -2858 | 27470 | AN7050 |
| 1349 | CONTIG117 | 247214 | 247483 | 1.4  | 5.36E-02 | transcription_start_site | + | 250327 | 250327 | -2978 | 27471 | AN7050 |
| 1349 | CONTIG117 | 247214 | 247483 | 1.4  | 5.36E-02 | transcription_start_site | + | 250511 | 250511 | -3162 | 27472 | AN7050 |
| 1349 | CONTIG117 | 247214 | 247483 | 1.4  | 5.36E-02 | transcription_start_site | + | 251435 | 251435 | -4086 | 27473 | AN7050 |
| 1349 | CONTIG117 | 247214 | 247483 | 1.4  | 5.36E-02 | transcription_start_site | + | 251915 | 251915 | -4566 | 27474 | AN7050 |
| 1349 | CONTIG117 | 247214 | 247483 | 1.4  | 5.36E-02 | transcription_start_site | + | 252147 | 252147 | -4798 | 27475 | AN7050 |
| 2236 | CONTIG117 | 253210 | 253934 | 0.76 | 1.67E-01 | transcription_start_site | + | 253184 | 253184 | 388   | 27476 | AN7050 |
| 440  | CONTIG117 | 249165 | 249439 | 2.4  | 1.77E-03 | transcription_start_site | + | 253860 | 253860 | -4558 | 27477 | AN7051 |
| 440  | CONTIG117 | 249165 | 249439 | 2.4  | 1.77E-03 | transcription_start_site | + | 254098 | 254098 | -4796 | 27478 | AN7051 |
| 2236 | CONTIG117 | 253210 | 253934 | 0.76 | 1.67E-01 | transcription_start_site | + | 253860 | 253860 | -288  | 27477 | AN7051 |
| 2236 | CONTIG117 | 253210 | 253934 | 0.76 | 1.67E-01 | transcription_start_site | + | 254098 | 254098 | -526  | 27478 | AN7051 |
| 2236 | CONTIG117 | 253210 | 253934 | 0.76 | 1.67E-01 | transcription_start_site | + | 255652 | 255652 | -2080 | 27479 | AN7052 |
| 2236 | CONTIG117 | 253210 | 253934 | 0.76 | 1.67E-01 | transcription_start_site | + | 255855 | 255855 | -2283 | 27480 | AN7052 |
| 2236 | CONTIG117 | 253210 | 253934 | 0.76 | 1.67E-01 | transcription_start_site | + | 257727 | 257727 | -4155 | 27481 | AN7053 |
| 2236 | CONTIG117 | 253210 | 253934 | 0.76 | 1.67E-01 | transcription_start_site | + | 257885 | 257885 | -4313 | 27482 | AN7053 |
| 1328 | CONTIG118 | 51995  | 52405  | 1.41 | 4.57E-03 | transcription_start_site | + | 52988  | 52988  | -788  | 27563 | AN7076 |
| 1328 | CONTIG118 | 51995  | 52405  | 1.41 | 4.57E-03 | transcription_start_site | + | 53200  | 53200  | -1000 | 27564 | AN7076 |
| 1328 | CONTIG118 | 51995  | 52405  | 1.41 | 4.57E-03 | transcription_start_site | + | 53662  | 53662  | -1462 | 27565 | AN7076 |
| 1328 | CONTIG118 | 51995  | 52405  | 1.41 | 4.57E-03 | transcription_start_site | + | 53854  | 53854  | -1654 | 27566 | AN7076 |
| 2320 | CONTIG118 | 51245  | 51822  | 0.64 | 1.76E-01 | transcription_start_site | + | 52988  | 52988  | -1454 | 27563 | AN7076 |
| 2320 | CONTIG118 | 51245  | 51822  | 0.64 | 1.76E-01 | transcription_start_site | + | 53200  | 53200  | -1666 | 27564 | AN7076 |
| 2320 | CONTIG118 | 51245  | 51822  | 0.64 | 1.76E-01 | transcription_start_site | + | 53662  | 53662  | -2128 | 27565 | AN7076 |
| 2320 | CONTIG118 | 51245  | 51822  | 0.64 | 1.76E-01 | transcription_start_site | + | 53854  | 53854  | -2320 | 27566 | AN7076 |
| 931  | CONTIG118 | 61431  | 62079  | 1.79 | 0.00E+00 | transcription_start_site | - | 56663  | 56663  | -5092 | 27567 | AN7077 |
| 2164 | CONTIG118 | 60766  | 61120  | 0.82 | 7.66E-02 | transcription_start_site | - | 56663  | 56663  | -4280 | 27567 | AN7077 |
| 2164 | CONTIG118 | 60766  | 61120  | 0.82 | 7.66E-02 | transcription_start_site | - | 56146  | 56146  | -4797 | 27568 | AN7077 |
| 931  | CONTIG118 | 61431  | 62079  | 1.79 | 0.00E+00 | transcription_start_site | - | 60251  | 60251  | -1504 | 27571 | AN7078 |
| 931  | CONTIG118 | 61431  | 62079  | 1.79 | 0.00E+00 | transcription_start_site | - | 59511  | 59511  | -2244 | 27572 | AN7078 |
| 931  | CONTIG118 | 61431  | 62079  | 1.79 | 0.00E+00 | transcription_start_site | - | 59296  | 59296  | -2459 | 27573 | AN7078 |
| 931  | CONTIG118 | 61431  | 62079  | 1.79 | 0.00E+00 | transcription_start_site | - | 59119  | 59119  | -2636 | 27574 | AN7078 |
| 931  | CONTIG118 | 61431  | 62079  | 1.79 | 0.00E+00 | transcription_start_site | - | 58970  | 58970  | -2785 | 27575 | AN7078 |
| 931  | CONTIG118 | 61431  | 62079  | 1.79 | 0.00E+00 | transcription_start_site | - | 58801  | 58801  | -2954 | 27576 | AN7078 |
| 931  | CONTIG118 | 61431  | 62079  | 1.79 | 0.00E+00 | transcription_start_site | - | 58576  | 58576  | -3179 | 27577 | AN7078 |
| 931  | CONTIG118 | 61431  | 62079  | 1.79 | 0.00E+00 | transcription_start_site | - | 58264  | 58264  | -3491 | 27578 | AN7078 |
| 931  | CONTIG118 | 61431  | 62079  | 1.79 | 0.00E+00 | transcription_start_site | - | 58108  | 58108  | -3647 | 27579 | AN7078 |
| 931  | CONTIG118 | 61431  | 62079  | 1.79 | 0.00E+00 | transcription_start_site | - | 57790  | 57790  | -3965 | 27580 | AN7078 |
| 931  | CONTIG118 | 61431  | 62079  | 1.79 | 0.00E+00 | transcription_start_site | - | 57736  | 57736  | -4019 | 27581 | AN7078 |
| 931  | CONTIG118 | 61431  | 62079  | 1.79 | 0.00E+00 | transcription_start_site | - | 57605  | 57605  | -4150 | 27582 | AN7078 |
| 2132 | CONTIG118 | 62792  | 63286  | 0.85 | 3.61E-02 | transcription_start_site | - | 60251  | 60251  | -2788 | 27571 | AN7078 |
| 2132 | CONTIG118 | 62792  | 63286  | 0.85 | 3.61E-02 | transcription_start_site | - | 59511  | 59511  | -3528 | 27572 | AN7078 |
| 2132 | CONTIG118 | 62792  | 63286  | 0.85 | 3.61E-02 | transcription_start_site | - | 59296  | 59296  | -3743 | 27573 | AN7078 |
| 2132 | CONTIG118 | 62792  | 63286  | 0.85 | 3.61E-02 | transcription_start_site | - | 59119  | 59119  | -3920 | 27574 | AN7078 |
| 2132 | CONTIG118 | 62792  | 63286  | 0.85 | 3.61E-02 | transcription_start_site | - | 58970  | 58970  | -4069 | 27575 | AN7078 |
| 2132 | CONTIG118 | 62792  | 63286  | 0.85 | 3.61E-02 | transcription_start_site | - | 58801  | 58801  | -4238 | 27576 | AN7078 |
| 2132 | CONTIG118 | 62792  | 63286  | 0.85 | 3.61E-02 | transcription_start_site | - | 58576  | 58576  | -4463 | 27577 | AN7078 |
| 2132 | CONTIG118 | 62792  | 63286  | 0.85 | 3.61E-02 | transcription_start_site | - | 58264  | 58264  | -4775 | 27578 | AN7078 |
| 2132 | CONTIG118 | 62792  | 63286  | 0.85 | 3.61E-02 | transcription_start_site | - | 58108  | 58108  | -4931 | 27579 | AN7078 |

|      |           |       |       |      |          |                          |   |       |       |       |       |        |
|------|-----------|-------|-------|------|----------|--------------------------|---|-------|-------|-------|-------|--------|
| 2164 | CONTIG118 | 60766 | 61120 | 0.82 | 7.66E-02 | transcription_start_site | - | 60251 | 60251 | -692  | 27571 | AN7078 |
| 2164 | CONTIG118 | 60766 | 61120 | 0.82 | 7.66E-02 | transcription_start_site | - | 59511 | 59511 | -1432 | 27572 | AN7078 |
| 2164 | CONTIG118 | 60766 | 61120 | 0.82 | 7.66E-02 | transcription_start_site | - | 59296 | 59296 | -1647 | 27573 | AN7078 |
| 2164 | CONTIG118 | 60766 | 61120 | 0.82 | 7.66E-02 | transcription_start_site | - | 59119 | 59119 | -1824 | 27574 | AN7078 |
| 2164 | CONTIG118 | 60766 | 61120 | 0.82 | 7.66E-02 | transcription_start_site | - | 58970 | 58970 | -1973 | 27575 | AN7078 |
| 2164 | CONTIG118 | 60766 | 61120 | 0.82 | 7.66E-02 | transcription_start_site | - | 58801 | 58801 | -2142 | 27576 | AN7078 |
| 2164 | CONTIG118 | 60766 | 61120 | 0.82 | 7.66E-02 | transcription_start_site | - | 58576 | 58576 | -2367 | 27577 | AN7078 |
| 2164 | CONTIG118 | 60766 | 61120 | 0.82 | 7.66E-02 | transcription_start_site | - | 58264 | 58264 | -2679 | 27578 | AN7078 |
| 2164 | CONTIG118 | 60766 | 61120 | 0.82 | 7.66E-02 | transcription_start_site | - | 58108 | 58108 | -2835 | 27579 | AN7078 |
| 2164 | CONTIG118 | 60766 | 61120 | 0.82 | 7.66E-02 | transcription_start_site | - | 57790 | 57790 | -3153 | 27580 | AN7078 |
| 2164 | CONTIG118 | 60766 | 61120 | 0.82 | 7.66E-02 | transcription_start_site | - | 57736 | 57736 | -3207 | 27581 | AN7078 |
| 2164 | CONTIG118 | 60766 | 61120 | 0.82 | 7.66E-02 | transcription_start_site | - | 57605 | 57605 | -3338 | 27582 | AN7078 |
| 932  | CONTIG118 | 67144 | 67579 | 1.79 | 2.69E-04 | transcription_start_site | - | 66482 | 66482 | -879  | 27583 | AN7080 |
| 932  | CONTIG118 | 67144 | 67579 | 1.79 | 2.69E-04 | transcription_start_site | - | 65831 | 65831 | -1530 | 27584 | AN7080 |
| 932  | CONTIG118 | 67144 | 67579 | 1.79 | 2.69E-04 | transcription_start_site | - | 65723 | 65723 | -1638 | 27585 | AN7080 |
| 932  | CONTIG118 | 67144 | 67579 | 1.79 | 2.69E-04 | transcription_start_site | + | 68362 | 68362 | -1000 | 27586 | AN7081 |
| 932  | CONTIG118 | 67144 | 67579 | 1.79 | 2.69E-04 | transcription_start_site | + | 68703 | 68703 | -1341 | 27587 | AN7081 |
| 932  | CONTIG118 | 67144 | 67579 | 1.79 | 2.69E-04 | transcription_start_site | + | 68966 | 68966 | -1604 | 27588 | AN7081 |
| 1750 | CONTIG118 | 85205 | 85564 | 1.1  | 2.05E-02 | transcription_start_site | - | 85565 | 85565 | 180   | 27603 | AN7085 |
| 1750 | CONTIG118 | 85205 | 85564 | 1.1  | 2.05E-02 | transcription_start_site | - | 85945 | 85945 | 560   | 27602 | AN7085 |
| 1955 | CONTIG118 | 86192 | 86601 | 0.97 | 3.70E-02 | transcription_start_site | - | 85945 | 85945 | -451  | 27602 | AN7085 |
| 1955 | CONTIG118 | 86192 | 86601 | 0.97 | 3.70E-02 | transcription_start_site | - | 87191 | 87191 | 794   | 27601 | AN7085 |
| 1955 | CONTIG118 | 86192 | 86601 | 0.97 | 3.70E-02 | transcription_start_site | - | 85565 | 85565 | -831  | 27603 | AN7085 |
| 2301 | CONTIG118 | 92192 | 92775 | 0.67 | 1.54E-01 | transcription_start_site | - | 90315 | 90315 | -2168 | 27604 | AN7086 |
| 2301 | CONTIG118 | 92192 | 92775 | 0.67 | 1.54E-01 | transcription_start_site | - | 90031 | 90031 | -2452 | 27605 | AN7086 |
| 2301 | CONTIG118 | 92192 | 92775 | 0.67 | 1.54E-01 | transcription_start_site | + | 93604 | 93604 | -1120 | 27606 | AN7087 |
| 688  | CONTIG119 | 20027 | 20391 | 2.06 | 8.35E-04 | transcription_start_site | - | 15859 | 15859 | -4350 | 27630 | AN7094 |
| 688  | CONTIG119 | 20027 | 20391 | 2.06 | 8.35E-04 | transcription_start_site | - | 15424 | 15424 | -4785 | 27631 | AN7094 |
| 688  | CONTIG119 | 20027 | 20391 | 2.06 | 8.35E-04 | transcription_start_site | - | 15081 | 15081 | -5128 | 27632 | AN7094 |
| 688  | CONTIG119 | 20027 | 20391 | 2.06 | 8.35E-04 | transcription_start_site | - | 19553 | 19553 | -656  | 27633 | AN7095 |
| 688  | CONTIG119 | 20027 | 20391 | 2.06 | 8.35E-04 | transcription_start_site | - | 18053 | 18053 | -2156 | 27634 | AN7095 |
| 975  | CONTIG119 | 36378 | 36877 | 1.74 | 4.57E-03 | transcription_start_site | - | 32020 | 32020 | -4607 | 27645 | AN7098 |
| 975  | CONTIG119 | 36378 | 36877 | 1.74 | 4.57E-03 | transcription_start_site | - | 31870 | 31870 | -4757 | 27646 | AN7098 |
| 975  | CONTIG119 | 36378 | 36877 | 1.74 | 4.57E-03 | transcription_start_site | - | 31554 | 31554 | -5073 | 27647 | AN7098 |
| 1456 | CONTIG119 | 35553 | 35915 | 1.3  | 2.63E-02 | transcription_start_site | - | 32020 | 32020 | -3714 | 27645 | AN7098 |
| 1456 | CONTIG119 | 35553 | 35915 | 1.3  | 2.63E-02 | transcription_start_site | - | 31870 | 31870 | -3864 | 27646 | AN7098 |
| 1456 | CONTIG119 | 35553 | 35915 | 1.3  | 2.63E-02 | transcription_start_site | - | 31554 | 31554 | -4180 | 27647 | AN7098 |
| 1456 | CONTIG119 | 35553 | 35915 | 1.3  | 2.63E-02 | transcription_start_site | - | 31283 | 31283 | -4451 | 27648 | AN7098 |
| 1456 | CONTIG119 | 35553 | 35915 | 1.3  | 2.63E-02 | transcription_start_site | - | 30942 | 30942 | -4792 | 27649 | AN7098 |
| 451  | CONTIG119 | 43208 | 43937 | 2.38 | 0.00E+00 | transcription_start_site | - | 42285 | 42285 | -1287 | 27652 | AN7101 |
| 451  | CONTIG119 | 43208 | 43937 | 2.38 | 0.00E+00 | transcription_start_site | - | 42115 | 42115 | -1457 | 27653 | AN7101 |
| 451  | CONTIG119 | 43208 | 43937 | 2.38 | 0.00E+00 | transcription_start_site | - | 41447 | 41447 | -2125 | 27654 | AN7101 |
| 451  | CONTIG119 | 43208 | 43937 | 2.38 | 0.00E+00 | transcription_start_site | - | 43534 | 43534 | -38   | 27657 | AN7102 |
| 451  | CONTIG119 | 43208 | 43937 | 2.38 | 0.00E+00 | transcription_start_site | - | 43706 | 43706 | 133   | 27656 | AN7102 |
| 451  | CONTIG119 | 43208 | 43937 | 2.38 | 0.00E+00 | transcription_start_site | - | 44063 | 44063 | 490   | 27655 | AN7102 |
| 1889 | CONTIG119 | 49353 | 50007 | 1.01 | 4.21E-02 | transcription_start_site | - | 49012 | 49012 | -668  | 27658 | AN7103 |
| 1889 | CONTIG119 | 49353 | 50007 | 1.01 | 4.21E-02 | transcription_start_site | - | 48802 | 48802 | -878  | 27659 | AN7103 |
| 1889 | CONTIG119 | 49353 | 50007 | 1.01 | 4.21E-02 | transcription_start_site | - | 48675 | 48675 | -1005 | 27660 | AN7103 |
| 1889 | CONTIG119 | 49353 | 50007 | 1.01 | 4.21E-02 | transcription_start_site | - | 45177 | 45177 | -4503 | 27661 | AN7103 |
| 1889 | CONTIG119 | 49353 | 50007 | 1.01 | 4.21E-02 | transcription_start_site | - | 45004 | 45004 | -4676 | 27662 | AN7103 |
| 1889 | CONTIG119 | 49353 | 50007 | 1.01 | 4.21E-02 | transcription_start_site | + | 50840 | 50840 | -1160 | 27663 | AN7104 |
| 1889 | CONTIG119 | 49353 | 50007 | 1.01 | 4.21E-02 | transcription_start_site | + | 51450 | 51450 | -1770 | 27664 | AN7104 |
| 1889 | CONTIG119 | 49353 | 50007 | 1.01 | 4.21E-02 | transcription_start_site | + | 51764 | 51764 | -2084 | 27665 | AN7104 |
| 1889 | CONTIG119 | 49353 | 50007 | 1.01 | 4.21E-02 | transcription_start_site | + | 52022 | 52022 | -2342 | 27666 | AN7104 |
| 1889 | CONTIG119 | 49353 | 50007 | 1.01 | 4.21E-02 | transcription_start_site | + | 52235 | 52235 | -2555 | 27667 | AN7104 |
| 1889 | CONTIG119 | 49353 | 50007 | 1.01 | 4.21E-02 | transcription_start_site | + | 52549 | 52549 | -2869 | 27668 | AN7104 |
| 1889 | CONTIG119 | 49353 | 50007 | 1.01 | 4.21E-02 | transcription_start_site | + | 52723 | 52723 | -3043 | 27669 | AN7104 |

|      |           |        |        |      |          |                          |   |        |        |       |       |        |
|------|-----------|--------|--------|------|----------|--------------------------|---|--------|--------|-------|-------|--------|
| 1889 | CONTIG119 | 49353  | 50007  | 1.01 | 4.21E-02 | transcription_start_site | + | 53129  | 53129  | -3449 | 27670 | AN7104 |
| 2084 | CONTIG119 | 68188  | 68767  | 0.89 | 1.22E-01 | transcription_start_site | - | 63204  | 63204  | -5273 | 27679 | AN7108 |
| 2084 | CONTIG119 | 68188  | 68767  | 0.89 | 1.22E-01 | transcription_start_site | - | 65939  | 65939  | -2538 | 27684 | AN7109 |
| 2084 | CONTIG119 | 68188  | 68767  | 0.89 | 1.22E-01 | transcription_start_site | + | 67193  | 67193  | 1284  | 27686 | AN7110 |
| 2084 | CONTIG119 | 68188  | 68767  | 0.89 | 1.22E-01 | transcription_start_site | + | 68818  | 68818  | -340  | 27687 | AN7111 |
| 2084 | CONTIG119 | 68188  | 68767  | 0.89 | 1.22E-01 | transcription_start_site | + | 69041  | 69041  | -563  | 27688 | AN7111 |
| 2084 | CONTIG119 | 68188  | 68767  | 0.89 | 1.22E-01 | transcription_start_site | + | 69318  | 69318  | -840  | 27689 | AN7111 |
| 2084 | CONTIG119 | 68188  | 68767  | 0.89 | 1.22E-01 | transcription_start_site | + | 69471  | 69471  | -993  | 27690 | AN7111 |
| 2084 | CONTIG119 | 68188  | 68767  | 0.89 | 1.22E-01 | transcription_start_site | + | 69606  | 69606  | -1128 | 27691 | AN7111 |
| 2084 | CONTIG119 | 68188  | 68767  | 0.89 | 1.22E-01 | transcription_start_site | + | 70039  | 70039  | -1561 | 27692 | AN7111 |
| 2084 | CONTIG119 | 68188  | 68767  | 0.89 | 1.22E-01 | transcription_start_site | + | 70497  | 70497  | -2019 | 27693 | AN7111 |
| 2122 | CONTIG119 | 106277 | 106631 | 0.86 | 1.38E-01 | transcription_start_site | - | 103650 | 103650 | -2804 | 27712 | AN7119 |
| 2122 | CONTIG119 | 106277 | 106631 | 0.86 | 1.38E-01 | transcription_start_site | - | 102282 | 102282 | -4172 | 27713 | AN7119 |
| 2122 | CONTIG119 | 106277 | 106631 | 0.86 | 1.38E-01 | transcription_start_site | - | 101976 | 101976 | -4478 | 27714 | AN7119 |
| 2122 | CONTIG119 | 106277 | 106631 | 0.86 | 1.38E-01 | transcription_start_site | - | 101841 | 101841 | -4613 | 27715 | AN7119 |
| 2122 | CONTIG119 | 106277 | 106631 | 0.86 | 1.38E-01 | transcription_start_site | - | 101493 | 101493 | -4961 | 27716 | AN7119 |
| 2122 | CONTIG119 | 106277 | 106631 | 0.86 | 1.38E-01 | transcription_start_site | - | 101348 | 101348 | -5106 | 27717 | AN7119 |
| 2122 | CONTIG119 | 106277 | 106631 | 0.86 | 1.38E-01 | transcription_start_site | + | 106772 | 106772 | -318  | 27719 | AN7120 |
| 2122 | CONTIG119 | 106277 | 106631 | 0.86 | 1.38E-01 | transcription_start_site | + | 106882 | 106882 | -428  | 27720 | AN7120 |
| 594  | CONTIG119 | 122568 | 123062 | 2.19 | 2.51E-04 | transcription_start_site | - | 121456 | 121456 | -1359 | 27733 | AN7123 |
| 594  | CONTIG119 | 122568 | 123062 | 2.19 | 2.51E-04 | transcription_start_site | - | 122832 | 122832 | 17    | 27736 | AN7124 |
| 594  | CONTIG119 | 122568 | 123062 | 2.19 | 2.51E-04 | transcription_start_site | - | 122928 | 122928 | 113   | 27735 | AN7124 |
| 594  | CONTIG119 | 122568 | 123062 | 2.19 | 2.51E-04 | transcription_start_site | - | 122631 | 122631 | -184  | 27737 | AN7124 |
| 594  | CONTIG119 | 122568 | 123062 | 2.19 | 2.51E-04 | transcription_start_site | - | 123703 | 123703 | 888   | 27734 | AN7124 |
| 594  | CONTIG119 | 122568 | 123062 | 2.19 | 2.51E-04 | transcription_start_site | + | 125434 | 125434 | -2619 | 27738 | AN7125 |
| 594  | CONTIG119 | 122568 | 123062 | 2.19 | 2.51E-04 | transcription_start_site | + | 125926 | 125926 | -3111 | 27739 | AN7125 |
| 594  | CONTIG119 | 122568 | 123062 | 2.19 | 2.51E-04 | transcription_start_site | + | 126311 | 126311 | -3496 | 27740 | AN7125 |
| 2359 | CONTIG121 | 10352  | 10701  | 0.5  | 1.54E-01 | transcription_start_site | - | 10687  | 10687  | 160   | 27748 | AN7131 |
| 2359 | CONTIG121 | 10352  | 10701  | 0.5  | 1.54E-01 | transcription_start_site | - | 10333  | 10333  | -193  | 27749 | AN7131 |
| 2359 | CONTIG121 | 10352  | 10701  | 0.5  | 1.54E-01 | transcription_start_site | - | 9498   | 9498   | -1028 | 27750 | AN7131 |
| 2359 | CONTIG121 | 10352  | 10701  | 0.5  | 1.54E-01 | transcription_start_site | - | 9174   | 9174   | -1352 | 27751 | AN7131 |
| 2359 | CONTIG121 | 10352  | 10701  | 0.5  | 1.54E-01 | transcription_start_site | - | 8985   | 8985   | -1541 | 27752 | AN7131 |
| 2359 | CONTIG121 | 10352  | 10701  | 0.5  | 1.54E-01 | transcription_start_site | - | 8856   | 8856   | -1670 | 27753 | AN7131 |
| 2359 | CONTIG121 | 10352  | 10701  | 0.5  | 1.54E-01 | transcription_start_site | + | 10899  | 10899  | -372  | 27754 | AN7132 |
| 2359 | CONTIG121 | 10352  | 10701  | 0.5  | 1.54E-01 | transcription_start_site | + | 11101  | 11101  | -574  | 27755 | AN7132 |
| 2359 | CONTIG121 | 10352  | 10701  | 0.5  | 1.54E-01 | transcription_start_site | + | 11224  | 11224  | -697  | 27756 | AN7132 |
| 2359 | CONTIG121 | 10352  | 10701  | 0.5  | 1.54E-01 | transcription_start_site | + | 11519  | 11519  | -992  | 27757 | AN7132 |
| 2359 | CONTIG121 | 10352  | 10701  | 0.5  | 1.54E-01 | transcription_start_site | + | 12318  | 12318  | -1791 | 27758 | AN7132 |
| 2359 | CONTIG121 | 10352  | 10701  | 0.5  | 1.54E-01 | transcription_start_site | + | 12477  | 12477  | -1950 | 27759 | AN7132 |
| 2359 | CONTIG121 | 10352  | 10701  | 0.5  | 1.54E-01 | transcription_start_site | + | 12718  | 12718  | -2191 | 27760 | AN7132 |
| 2359 | CONTIG121 | 10352  | 10701  | 0.5  | 1.54E-01 | transcription_start_site | + | 13085  | 13085  | -2558 | 27761 | AN7132 |
| 2359 | CONTIG121 | 10352  | 10701  | 0.5  | 1.54E-01 | transcription_start_site | + | 13211  | 13211  | -2684 | 27762 | AN7132 |
| 2359 | CONTIG121 | 10352  | 10701  | 0.5  | 1.54E-01 | transcription_start_site | + | 13309  | 13309  | -2782 | 27763 | AN7132 |
| 2359 | CONTIG121 | 10352  | 10701  | 0.5  | 1.54E-01 | transcription_start_site | + | 13467  | 13467  | -2940 | 27764 | AN7132 |
| 2359 | CONTIG121 | 10352  | 10701  | 0.5  | 1.54E-01 | transcription_start_site | + | 13637  | 13637  | -3110 | 27765 | AN7132 |
| 374  | CONTIG122 | 6155   | 6519   | 2.49 | 1.20E-03 | transcription_start_site | + | 10230  | 10230  | -3893 | 27778 | AN7135 |
| 374  | CONTIG122 | 6155   | 6519   | 2.49 | 1.20E-03 | transcription_start_site | + | 10533  | 10533  | -4196 | 27779 | AN7135 |
| 374  | CONTIG122 | 6155   | 6519   | 2.49 | 1.20E-03 | transcription_start_site | + | 10678  | 10678  | -4341 | 27780 | AN7135 |
| 374  | CONTIG122 | 6155   | 6519   | 2.49 | 1.20E-03 | transcription_start_site | + | 10915  | 10915  | -4578 | 27781 | AN7135 |
| 374  | CONTIG122 | 6155   | 6519   | 2.49 | 1.20E-03 | transcription_start_site | + | 11035  | 11035  | -4698 | 27782 | AN7135 |
| 374  | CONTIG122 | 6155   | 6519   | 2.49 | 1.20E-03 | transcription_start_site | + | 11134  | 11134  | -4797 | 27783 | AN7135 |
| 374  | CONTIG122 | 6155   | 6519   | 2.49 | 1.20E-03 | transcription_start_site | + | 11400  | 11400  | -5063 | 27784 | AN7135 |
| 1116 | CONTIG122 | 23870  | 24133  | 1.6  | 3.70E-02 | transcription_start_site | - | 20444  | 20444  | -3557 | 27789 | AN7137 |
| 1116 | CONTIG122 | 23870  | 24133  | 1.6  | 3.70E-02 | transcription_start_site | - | 20158  | 20158  | -3843 | 27790 | AN7137 |
| 1116 | CONTIG122 | 23870  | 24133  | 1.6  | 3.70E-02 | transcription_start_site | - | 19713  | 19713  | -4288 | 27791 | AN7137 |
| 1116 | CONTIG122 | 23870  | 24133  | 1.6  | 3.70E-02 | transcription_start_site | - | 19656  | 19656  | -4345 | 27792 | AN7137 |
| 1116 | CONTIG122 | 23870  | 24133  | 1.6  | 3.70E-02 | transcription_start_site | - | 19244  | 19244  | -4757 | 27793 | AN7137 |



|      |           |        |        |      |          |                          |   |        |        |       |       |        |
|------|-----------|--------|--------|------|----------|--------------------------|---|--------|--------|-------|-------|--------|
| 1116 | CONTIG122 | 23870  | 24133  | 1.6  | 3.70E-02 | transcription_start_site | - | 23416  | 23416  | -585  | 27794 | AN7138 |
| 1116 | CONTIG122 | 23870  | 24133  | 1.6  | 3.70E-02 | transcription_start_site | - | 23151  | 23151  | -850  | 27795 | AN7138 |
| 1116 | CONTIG122 | 23870  | 24133  | 1.6  | 3.70E-02 | transcription_start_site | - | 22934  | 22934  | -1067 | 27796 | AN7138 |
| 1116 | CONTIG122 | 23870  | 24133  | 1.6  | 3.70E-02 | transcription_start_site | - | 21821  | 21821  | -2180 | 27797 | AN7138 |
| 1116 | CONTIG122 | 23870  | 24133  | 1.6  | 3.70E-02 | transcription_start_site | + | 24109  | 24109  | -107  | 27798 | AN7139 |
| 1116 | CONTIG122 | 23870  | 24133  | 1.6  | 3.70E-02 | transcription_start_site | + | 24394  | 24394  | -392  | 27799 | AN7139 |
| 1116 | CONTIG122 | 23870  | 24133  | 1.6  | 3.70E-02 | transcription_start_site | + | 24886  | 24886  | -884  | 27800 | AN7139 |
| 1116 | CONTIG122 | 23870  | 24133  | 1.6  | 3.70E-02 | transcription_start_site | + | 28075  | 28075  | -4073 | 27804 | AN7141 |
| 1116 | CONTIG122 | 23870  | 24133  | 1.6  | 3.70E-02 | transcription_start_site | + | 28523  | 28523  | -4521 | 27805 | AN7141 |
| 1116 | CONTIG122 | 23870  | 24133  | 1.6  | 3.70E-02 | transcription_start_site | + | 29040  | 29040  | -5038 | 27806 | AN7141 |
| 2098 | CONTIG122 | 35415  | 36511  | 0.88 | 1.07E-01 | transcription_start_site | - | 31061  | 31061  | -4902 | 27808 | AN7142 |
| 2098 | CONTIG122 | 35415  | 36511  | 0.88 | 1.07E-01 | transcription_start_site | - | 30814  | 30814  | -5149 | 27809 | AN7142 |
| 2098 | CONTIG122 | 35415  | 36511  | 0.88 | 1.07E-01 | transcription_start_site | - | 33242  | 33242  | -2721 | 27810 | AN7143 |
| 2098 | CONTIG122 | 35415  | 36511  | 0.88 | 1.07E-01 | transcription_start_site | - | 33014  | 33014  | -2949 | 27811 | AN7143 |
| 2098 | CONTIG122 | 35415  | 36511  | 0.88 | 1.07E-01 | transcription_start_site | - | 32814  | 32814  | -3149 | 27812 | AN7143 |
| 2098 | CONTIG122 | 35415  | 36511  | 0.88 | 1.07E-01 | transcription_start_site | - | 35762  | 35762  | -201  | 27816 | AN7145 |
| 2098 | CONTIG122 | 35415  | 36511  | 0.88 | 1.07E-01 | transcription_start_site | + | 36488  | 36488  | -525  | 27817 | AN7146 |
| 2098 | CONTIG122 | 35415  | 36511  | 0.88 | 1.07E-01 | transcription_start_site | + | 36751  | 36751  | -788  | 27818 | AN7146 |
| 2098 | CONTIG122 | 35415  | 36511  | 0.88 | 1.07E-01 | transcription_start_site | + | 36840  | 36840  | -877  | 27819 | AN7146 |
| 2098 | CONTIG122 | 35415  | 36511  | 0.88 | 1.07E-01 | transcription_start_site | + | 38199  | 38199  | -2236 | 27820 | AN7147 |
| 2098 | CONTIG122 | 35415  | 36511  | 0.88 | 1.07E-01 | transcription_start_site | + | 38496  | 38496  | -2533 | 27821 | AN7147 |
| 2098 | CONTIG122 | 35415  | 36511  | 0.88 | 1.07E-01 | transcription_start_site | + | 38564  | 38564  | -2601 | 27822 | AN7147 |
| 2098 | CONTIG122 | 35415  | 36511  | 0.88 | 1.07E-01 | transcription_start_site | + | 40810  | 40810  | -4847 | 27823 | AN7148 |
| 1965 | CONTIG122 | 43220  | 43631  | 0.97 | 1.23E-01 | transcription_start_site | - | 43234  | 43234  | -191  | 27824 | AN7149 |
| 1965 | CONTIG122 | 43220  | 43631  | 0.97 | 1.23E-01 | transcription_start_site | - | 43067  | 43067  | -358  | 27825 | AN7149 |
| 1965 | CONTIG122 | 43220  | 43631  | 0.97 | 1.23E-01 | transcription_start_site | - | 41959  | 41959  | -1466 | 27826 | AN7149 |
| 1965 | CONTIG122 | 43220  | 43631  | 0.97 | 1.23E-01 | transcription_start_site | + | 45568  | 45568  | -2142 | 27827 | AN7150 |
| 726  | CONTIG122 | 68184  | 68528  | 2.02 | 1.06E-02 | transcription_start_site | - | 65616  | 65616  | -2740 | 27842 | AN7156 |
| 726  | CONTIG122 | 68184  | 68528  | 2.02 | 1.06E-02 | transcription_start_site | + | 68697  | 68697  | -341  | 27845 | AN7158 |
| 726  | CONTIG122 | 68184  | 68528  | 2.02 | 1.06E-02 | transcription_start_site | + | 69138  | 69138  | -782  | 27846 | AN7158 |
| 1446 | CONTIG122 | 72160  | 72584  | 1.31 | 8.63E-02 | transcription_start_site | - | 72244  | 72244  | -128  | 27847 | AN7159 |
| 1446 | CONTIG122 | 72160  | 72584  | 1.31 | 8.63E-02 | transcription_start_site | - | 72199  | 72199  | -173  | 27848 | AN7159 |
| 1446 | CONTIG122 | 72160  | 72584  | 1.31 | 8.63E-02 | transcription_start_site | - | 71874  | 71874  | -498  | 27849 | AN7159 |
| 1446 | CONTIG122 | 72160  | 72584  | 1.31 | 8.63E-02 | transcription_start_site | + | 73926  | 73926  | -1554 | 27850 | AN7160 |
| 1446 | CONTIG122 | 72160  | 72584  | 1.31 | 8.63E-02 | transcription_start_site | + | 74078  | 74078  | -1706 | 27851 | AN7160 |
| 1446 | CONTIG122 | 72160  | 72584  | 1.31 | 8.63E-02 | transcription_start_site | + | 74220  | 74220  | -1848 | 27852 | AN7160 |
| 1446 | CONTIG122 | 72160  | 72584  | 1.31 | 8.63E-02 | transcription_start_site | + | 74890  | 74890  | -2518 | 27853 | AN7160 |
| 1446 | CONTIG122 | 72160  | 72584  | 1.31 | 8.63E-02 | transcription_start_site | + | 75129  | 75129  | -2757 | 27854 | AN7160 |
| 224  | CONTIG122 | 92785  | 93059  | 2.78 | 3.81E-04 | transcription_start_site | + | 93592  | 93592  | -670  | 27878 | AN7166 |
| 224  | CONTIG122 | 92785  | 93059  | 2.78 | 3.81E-04 | transcription_start_site | + | 96068  | 96068  | -3146 | 27879 | AN7167 |
| 224  | CONTIG122 | 92785  | 93059  | 2.78 | 3.81E-04 | transcription_start_site | + | 97141  | 97141  | -4219 | 27880 | AN7167 |
| 597  | CONTIG122 | 95496  | 95978  | 2.19 | 7.08E-03 | transcription_start_site | + | 96068  | 96068  | -331  | 27879 | AN7167 |
| 597  | CONTIG122 | 95496  | 95978  | 2.19 | 7.08E-03 | transcription_start_site | + | 97141  | 97141  | -1404 | 27880 | AN7167 |
| 48   | CONTIG122 | 101346 | 101600 | 3.24 | 0.00E+00 | transcription_start_site | + | 103592 | 103592 | -2119 | 27881 | AN7169 |
| 76   | CONTIG122 | 102766 | 103270 | 3.16 | 0.00E+00 | transcription_start_site | + | 103592 | 103592 | -574  | 27881 | AN7169 |
| 764  | CONTIG122 | 102081 | 102650 | 1.98 | 1.25E-02 | transcription_start_site | + | 103592 | 103592 | -1226 | 27881 | AN7169 |
| 76   | CONTIG122 | 102766 | 103270 | 3.16 | 0.00E+00 | transcription_start_site | + | 107836 | 107836 | -4818 | 27882 | AN7170 |
| 76   | CONTIG122 | 102766 | 103270 | 3.16 | 0.00E+00 | transcription_start_site | + | 108156 | 108156 | -5138 | 27883 | AN7170 |
| 441  | CONTIG122 | 105986 | 107380 | 2.4  | 3.37E-03 | transcription_start_site | + | 107836 | 107836 | -1153 | 27882 | AN7170 |
| 441  | CONTIG122 | 105986 | 107380 | 2.4  | 3.37E-03 | transcription_start_site | + | 108156 | 108156 | -1473 | 27883 | AN7170 |
| 650  | CONTIG122 | 104931 | 105302 | 2.11 | 9.32E-03 | transcription_start_site | + | 107836 | 107836 | -2719 | 27882 | AN7170 |
| 650  | CONTIG122 | 104931 | 105302 | 2.11 | 9.32E-03 | transcription_start_site | + | 108156 | 108156 | -3039 | 27883 | AN7170 |
| 692  | CONTIG122 | 118216 | 118860 | 2.06 | 9.96E-03 | transcription_start_site | - | 113532 | 113532 | -5006 | 27884 | AN7171 |
| 692  | CONTIG122 | 118216 | 118860 | 2.06 | 9.96E-03 | transcription_start_site | - | 113392 | 113392 | -5146 | 27885 | AN7171 |
| 692  | CONTIG122 | 118216 | 118860 | 2.06 | 9.96E-03 | transcription_start_site | - | 117581 | 117581 | -957  | 27887 | AN7172 |
| 692  | CONTIG122 | 118216 | 118860 | 2.06 | 9.96E-03 | transcription_start_site | - | 117501 | 117501 | -1037 | 27888 | AN7172 |
| 692  | CONTIG122 | 118216 | 118860 | 2.06 | 9.96E-03 | transcription_start_site | - | 115381 | 115381 | -3157 | 27889 | AN7172 |

|      |           |        |        |      |          |                          |   |        |        |       |       |        |
|------|-----------|--------|--------|------|----------|--------------------------|---|--------|--------|-------|-------|--------|
| 692  | CONTIG122 | 118216 | 118860 | 2.06 | 9.96E-03 | transcription_start_site | - | 114484 | 114484 | -4054 | 27890 | AN7172 |
| 692  | CONTIG122 | 118216 | 118860 | 2.06 | 9.96E-03 | transcription_start_site | + | 119329 | 119329 | -791  | 27891 | AN7173 |
| 692  | CONTIG122 | 118216 | 118860 | 2.06 | 9.96E-03 | transcription_start_site | + | 119518 | 119518 | -980  | 27892 | AN7173 |
| 692  | CONTIG122 | 118216 | 118860 | 2.06 | 9.96E-03 | transcription_start_site | + | 121535 | 121535 | -2997 | 27893 | AN7173 |
| 829  | CONTIG122 | 127801 | 128085 | 1.9  | 1.54E-02 | transcription_start_site | - | 125572 | 125572 | -2371 | 27894 | AN7174 |
| 829  | CONTIG122 | 127801 | 128085 | 1.9  | 1.54E-02 | transcription_start_site | - | 125422 | 125422 | -2521 | 27895 | AN7174 |
| 829  | CONTIG122 | 127801 | 128085 | 1.9  | 1.54E-02 | transcription_start_site | - | 125236 | 125236 | -2707 | 27896 | AN7174 |
| 829  | CONTIG122 | 127801 | 128085 | 1.9  | 1.54E-02 | transcription_start_site | - | 125080 | 125080 | -2863 | 27897 | AN7174 |
| 829  | CONTIG122 | 127801 | 128085 | 1.9  | 1.54E-02 | transcription_start_site | - | 124948 | 124948 | -2995 | 27898 | AN7174 |
| 829  | CONTIG122 | 127801 | 128085 | 1.9  | 1.54E-02 | transcription_start_site | - | 124786 | 124786 | -3157 | 27899 | AN7174 |
| 1640 | CONTIG122 | 125551 | 126201 | 1.18 | 7.38E-02 | transcription_start_site | - | 125572 | 125572 | -304  | 27894 | AN7174 |
| 1640 | CONTIG122 | 125551 | 126201 | 1.18 | 7.38E-02 | transcription_start_site | - | 125422 | 125422 | -454  | 27895 | AN7174 |
| 1640 | CONTIG122 | 125551 | 126201 | 1.18 | 7.38E-02 | transcription_start_site | - | 125236 | 125236 | -640  | 27896 | AN7174 |
| 1640 | CONTIG122 | 125551 | 126201 | 1.18 | 7.38E-02 | transcription_start_site | - | 125080 | 125080 | -796  | 27897 | AN7174 |
| 1640 | CONTIG122 | 125551 | 126201 | 1.18 | 7.38E-02 | transcription_start_site | - | 124948 | 124948 | -928  | 27898 | AN7174 |
| 1640 | CONTIG122 | 125551 | 126201 | 1.18 | 7.38E-02 | transcription_start_site | - | 124786 | 124786 | -1090 | 27899 | AN7174 |
| 829  | CONTIG122 | 127801 | 128085 | 1.9  | 1.54E-02 | transcription_start_site | + | 128676 | 128676 | -733  | 27900 | AN7175 |
| 1640 | CONTIG122 | 125551 | 126201 | 1.18 | 7.38E-02 | transcription_start_site | + | 128676 | 128676 | -2800 | 27900 | AN7175 |
| 1697 | CONTIG122 | 153769 | 154258 | 1.14 | 1.38E-01 | transcription_start_site | - | 150119 | 150119 | -3894 | 27923 | AN7184 |
| 1697 | CONTIG122 | 153769 | 154258 | 1.14 | 1.38E-01 | transcription_start_site | - | 149856 | 149856 | -4157 | 27924 | AN7184 |
| 1697 | CONTIG122 | 153769 | 154258 | 1.14 | 1.38E-01 | transcription_start_site | - | 153173 | 153173 | -840  | 27925 | AN7185 |
| 1697 | CONTIG122 | 153769 | 154258 | 1.14 | 1.38E-01 | transcription_start_site | - | 152926 | 152926 | -1087 | 27926 | AN7185 |
| 1697 | CONTIG122 | 153769 | 154258 | 1.14 | 1.38E-01 | transcription_start_site | - | 152103 | 152103 | -1910 | 27927 | AN7185 |
| 1697 | CONTIG122 | 153769 | 154258 | 1.14 | 1.38E-01 | transcription_start_site | - | 151705 | 151705 | -2308 | 27928 | AN7185 |
| 1761 | CONTIG122 | 158119 | 158460 | 1.1  | 1.54E-01 | transcription_start_site | - | 153173 | 153173 | -5116 | 27925 | AN7185 |
| 1697 | CONTIG122 | 153769 | 154258 | 1.14 | 1.38E-01 | transcription_start_site | + | 155571 | 155571 | -1557 | 27929 | AN7186 |
| 1697 | CONTIG122 | 153769 | 154258 | 1.14 | 1.38E-01 | transcription_start_site | + | 156193 | 156193 | -2179 | 27930 | AN7186 |
| 1761 | CONTIG122 | 158119 | 158460 | 1.1  | 1.54E-01 | transcription_start_site | - | 157546 | 157546 | -743  | 27931 | AN7187 |
| 1761 | CONTIG122 | 158119 | 158460 | 1.1  | 1.54E-01 | transcription_start_site | - | 157385 | 157385 | -904  | 27932 | AN7187 |
| 1761 | CONTIG122 | 158119 | 158460 | 1.1  | 1.54E-01 | transcription_start_site | - | 156941 | 156941 | -1348 | 27933 | AN7187 |
| 1697 | CONTIG122 | 153769 | 154258 | 1.14 | 1.38E-01 | transcription_start_site | + | 158798 | 158798 | -4784 | 27934 | AN7188 |
| 1697 | CONTIG122 | 153769 | 154258 | 1.14 | 1.38E-01 | transcription_start_site | + | 159008 | 159008 | -4994 | 27935 | AN7188 |
| 1761 | CONTIG122 | 158119 | 158460 | 1.1  | 1.54E-01 | transcription_start_site | + | 158798 | 158798 | -508  | 27934 | AN7188 |
| 1761 | CONTIG122 | 158119 | 158460 | 1.1  | 1.54E-01 | transcription_start_site | + | 159008 | 159008 | -718  | 27935 | AN7188 |
| 1761 | CONTIG122 | 158119 | 158460 | 1.1  | 1.54E-01 | transcription_start_site | + | 159284 | 159284 | -994  | 27936 | AN7188 |
| 1761 | CONTIG122 | 158119 | 158460 | 1.1  | 1.54E-01 | transcription_start_site | + | 160671 | 160671 | -2381 | 27937 | AN7188 |
| 1761 | CONTIG122 | 158119 | 158460 | 1.1  | 1.54E-01 | transcription_start_site | + | 160948 | 160948 | -2658 | 27938 | AN7188 |
| 1761 | CONTIG122 | 158119 | 158460 | 1.1  | 1.54E-01 | transcription_start_site | + | 161278 | 161278 | -2988 | 27939 | AN7188 |
| 1698 | CONTIG122 | 165089 | 165518 | 1.14 | 1.38E-01 | transcription_start_site | - | 163780 | 163780 | -1523 | 27940 | AN7189 |
| 1698 | CONTIG122 | 165089 | 165518 | 1.14 | 1.38E-01 | transcription_start_site | - | 162813 | 162813 | -2490 | 27941 | AN7189 |
| 1698 | CONTIG122 | 165089 | 165518 | 1.14 | 1.38E-01 | transcription_start_site | - | 162405 | 162405 | -2898 | 27942 | AN7189 |
| 1698 | CONTIG122 | 165089 | 165518 | 1.14 | 1.38E-01 | transcription_start_site | + | 165913 | 165913 | -609  | 27943 | AN7190 |
| 1698 | CONTIG122 | 165089 | 165518 | 1.14 | 1.38E-01 | transcription_start_site | + | 166354 | 166354 | -1050 | 27944 | AN7190 |
| 1698 | CONTIG122 | 165089 | 165518 | 1.14 | 1.38E-01 | transcription_start_site | + | 167092 | 167092 | -1788 | 27945 | AN7190 |
| 1698 | CONTIG122 | 165089 | 165518 | 1.14 | 1.38E-01 | transcription_start_site | + | 167248 | 167248 | -1944 | 27946 | AN7190 |
| 1698 | CONTIG122 | 165089 | 165518 | 1.14 | 1.38E-01 | transcription_start_site | + | 167394 | 167394 | -2090 | 27947 | AN7190 |
| 1698 | CONTIG122 | 165089 | 165518 | 1.14 | 1.38E-01 | transcription_start_site | + | 168968 | 168968 | -3664 | 27948 | AN7191 |
| 1698 | CONTIG122 | 165089 | 165518 | 1.14 | 1.38E-01 | transcription_start_site | + | 169370 | 169370 | -4066 | 27949 | AN7191 |
| 1698 | CONTIG122 | 165089 | 165518 | 1.14 | 1.38E-01 | transcription_start_site | + | 169430 | 169430 | -4126 | 27950 | AN7191 |
| 1643 | CONTIG122 | 172056 | 172477 | 1.18 | 1.22E-01 | transcription_start_site | - | 171903 | 171903 | -363  | 27951 | AN7192 |
| 1643 | CONTIG122 | 172056 | 172477 | 1.18 | 1.22E-01 | transcription_start_site | - | 171510 | 171510 | -756  | 27952 | AN7192 |
| 1643 | CONTIG122 | 172056 | 172477 | 1.18 | 1.22E-01 | transcription_start_site | - | 170868 | 170868 | -1398 | 27953 | AN7192 |
| 1643 | CONTIG122 | 172056 | 172477 | 1.18 | 1.22E-01 | transcription_start_site | + | 175529 | 175529 | -3262 | 27954 | AN7193 |
| 1643 | CONTIG122 | 172056 | 172477 | 1.18 | 1.22E-01 | transcription_start_site | + | 175632 | 175632 | -3365 | 27955 | AN7193 |
| 1643 | CONTIG122 | 172056 | 172477 | 1.18 | 1.22E-01 | transcription_start_site | + | 175881 | 175881 | -3614 | 27956 | AN7193 |
| 1643 | CONTIG122 | 172056 | 172477 | 1.18 | 1.22E-01 | transcription_start_site | + | 176353 | 176353 | -4086 | 27957 | AN7193 |
| 1063 | CONTIG123 | 7808   | 8154   | 1.66 | 2.05E-02 | transcription_start_site | + | 12391  | 12391  | -4410 | 28038 | AN7211 |

|      |           |        |        |      |          |                          |   |        |        |       |       |        |
|------|-----------|--------|--------|------|----------|--------------------------|---|--------|--------|-------|-------|--------|
| 1063 | CONTIG123 | 7808   | 8154   | 1.66 | 2.05E-02 | transcription_start_site | + | 12642  | 12642  | -4661 | 28039 | AN7211 |
| 1606 | CONTIG123 | 21244  | 22559  | 1.2  | 8.63E-02 | transcription_start_site | - | 21585  | 21585  | -316  | 28047 | AN7215 |
| 1606 | CONTIG123 | 21244  | 22559  | 1.2  | 8.63E-02 | transcription_start_site | - | 21477  | 21477  | -424  | 28048 | AN7215 |
| 1606 | CONTIG123 | 21244  | 22559  | 1.2  | 8.63E-02 | transcription_start_site | - | 21243  | 21243  | -658  | 28049 | AN7215 |
| 731  | CONTIG123 | 43132  | 43926  | 2.01 | 3.17E-03 | transcription_start_site | - | 39413  | 39413  | -4116 | 28056 | AN7219 |
| 731  | CONTIG123 | 43132  | 43926  | 2.01 | 3.17E-03 | transcription_start_site | - | 39093  | 39093  | -4436 | 28057 | AN7219 |
| 731  | CONTIG123 | 43132  | 43926  | 2.01 | 3.17E-03 | transcription_start_site | - | 38502  | 38502  | -5027 | 28058 | AN7219 |
| 731  | CONTIG123 | 43132  | 43926  | 2.01 | 3.17E-03 | transcription_start_site | - | 43550  | 43550  | 21    | 28064 | AN7221 |
| 731  | CONTIG123 | 43132  | 43926  | 2.01 | 3.17E-03 | transcription_start_site | - | 43633  | 43633  | 104   | 28063 | AN7221 |
| 731  | CONTIG123 | 43132  | 43926  | 2.01 | 3.17E-03 | transcription_start_site | - | 43957  | 43957  | 428   | 28062 | AN7221 |
| 731  | CONTIG123 | 43132  | 43926  | 2.01 | 3.17E-03 | transcription_start_site | - | 44291  | 44291  | 762   | 28061 | AN7221 |
| 731  | CONTIG123 | 43132  | 43926  | 2.01 | 3.17E-03 | transcription_start_site | + | 45392  | 45392  | -1863 | 28065 | AN7222 |
| 731  | CONTIG123 | 43132  | 43926  | 2.01 | 3.17E-03 | transcription_start_site | + | 45915  | 45915  | -2386 | 28066 | AN7222 |
| 731  | CONTIG123 | 43132  | 43926  | 2.01 | 3.17E-03 | transcription_start_site | + | 46307  | 46307  | -2778 | 28067 | AN7222 |
| 731  | CONTIG123 | 43132  | 43926  | 2.01 | 3.17E-03 | transcription_start_site | + | 46636  | 46636  | -3107 | 28068 | AN7222 |
| 273  | CONTIG123 | 58357  | 58631  | 2.67 | 2.51E-04 | transcription_start_site | - | 56033  | 56033  | -2461 | 28069 | AN7223 |
| 273  | CONTIG123 | 58357  | 58631  | 2.67 | 2.51E-04 | transcription_start_site | - | 54499  | 54499  | -3995 | 28070 | AN7223 |
| 1541 | CONTIG123 | 68637  | 68981  | 1.24 | 4.21E-02 | transcription_start_site | + | 68348  | 68348  | 461   | 28079 | AN7227 |
| 1541 | CONTIG123 | 68637  | 68981  | 1.24 | 4.21E-02 | transcription_start_site | + | 68075  | 68075  | 734   | 28078 | AN7227 |
| 1541 | CONTIG123 | 68637  | 68981  | 1.24 | 4.21E-02 | transcription_start_site | + | 67828  | 67828  | 981   | 28077 | AN7227 |
| 1541 | CONTIG123 | 68637  | 68981  | 1.24 | 4.21E-02 | transcription_start_site | + | 69910  | 69910  | -1101 | 28080 | AN7228 |
| 1541 | CONTIG123 | 68637  | 68981  | 1.24 | 4.21E-02 | transcription_start_site | + | 70057  | 70057  | -1248 | 28081 | AN7228 |
| 1541 | CONTIG123 | 68637  | 68981  | 1.24 | 4.21E-02 | transcription_start_site | + | 70229  | 70229  | -1420 | 28082 | AN7228 |
| 1541 | CONTIG123 | 68637  | 68981  | 1.24 | 4.21E-02 | transcription_start_site | + | 70702  | 70702  | -1893 | 28083 | AN7228 |
| 45   | CONTIG123 | 72157  | 72439  | 3.25 | 0.00E+00 | transcription_start_site | + | 73164  | 73164  | -866  | 28084 | AN7229 |
| 45   | CONTIG123 | 72157  | 72439  | 3.25 | 0.00E+00 | transcription_start_site | + | 73546  | 73546  | -1248 | 28085 | AN7229 |
| 1541 | CONTIG123 | 68637  | 68981  | 1.24 | 4.21E-02 | transcription_start_site | + | 73164  | 73164  | -4355 | 28084 | AN7229 |
| 1541 | CONTIG123 | 68637  | 68981  | 1.24 | 4.21E-02 | transcription_start_site | + | 73546  | 73546  | -4737 | 28085 | AN7229 |
| 45   | CONTIG123 | 72157  | 72439  | 3.25 | 0.00E+00 | transcription_start_site | + | 77107  | 77107  | -4809 | 28086 | AN7230 |
| 45   | CONTIG123 | 72157  | 72439  | 3.25 | 0.00E+00 | transcription_start_site | + | 77259  | 77259  | -4961 | 28087 | AN7230 |
| 1607 | CONTIG123 | 86628  | 87217  | 1.2  | 8.63E-02 | transcription_start_site | - | 81684  | 81684  | -5238 | 28092 | AN7231 |
| 361  | CONTIG123 | 87453  | 87811  | 2.52 | 7.06E-04 | transcription_start_site | - | 86042  | 86042  | -1590 | 28093 | AN7232 |
| 361  | CONTIG123 | 87453  | 87811  | 2.52 | 7.06E-04 | transcription_start_site | - | 85836  | 85836  | -1796 | 28094 | AN7232 |
| 361  | CONTIG123 | 87453  | 87811  | 2.52 | 7.06E-04 | transcription_start_site | - | 85278  | 85278  | -2354 | 28095 | AN7232 |
| 1607 | CONTIG123 | 86628  | 87217  | 1.2  | 8.63E-02 | transcription_start_site | - | 86042  | 86042  | -880  | 28093 | AN7232 |
| 1607 | CONTIG123 | 86628  | 87217  | 1.2  | 8.63E-02 | transcription_start_site | - | 85836  | 85836  | -1086 | 28094 | AN7232 |
| 1607 | CONTIG123 | 86628  | 87217  | 1.2  | 8.63E-02 | transcription_start_site | - | 85278  | 85278  | -1644 | 28095 | AN7232 |
| 361  | CONTIG123 | 87453  | 87811  | 2.52 | 7.06E-04 | transcription_start_site | + | 87832  | 87832  | -200  | 28096 | AN7233 |
| 361  | CONTIG123 | 87453  | 87811  | 2.52 | 7.06E-04 | transcription_start_site | + | 88283  | 88283  | -651  | 28097 | AN7233 |
| 361  | CONTIG123 | 87453  | 87811  | 2.52 | 7.06E-04 | transcription_start_site | + | 88691  | 88691  | -1059 | 28098 | AN7233 |
| 1607 | CONTIG123 | 86628  | 87217  | 1.2  | 8.63E-02 | transcription_start_site | + | 87832  | 87832  | -909  | 28096 | AN7233 |
| 1607 | CONTIG123 | 86628  | 87217  | 1.2  | 8.63E-02 | transcription_start_site | + | 88283  | 88283  | -1360 | 28097 | AN7233 |
| 1607 | CONTIG123 | 86628  | 87217  | 1.2  | 8.63E-02 | transcription_start_site | + | 88691  | 88691  | -1768 | 28098 | AN7233 |
| 361  | CONTIG123 | 87453  | 87811  | 2.52 | 7.06E-04 | transcription_start_site | + | 90713  | 90713  | -3081 | 28099 | AN7234 |
| 1607 | CONTIG123 | 86628  | 87217  | 1.2  | 8.63E-02 | transcription_start_site | + | 90713  | 90713  | -3790 | 28099 | AN7234 |
| 469  | CONTIG123 | 126017 | 126511 | 2.36 | 1.62E-03 | transcription_start_site | - | 127279 | 127279 | 1015  | 28138 | AN7247 |
| 469  | CONTIG123 | 126017 | 126511 | 2.36 | 1.62E-03 | transcription_start_site | - | 127407 | 127407 | 1143  | 28137 | AN7247 |
| 1058 | CONTIG124 | 11343  | 11694  | 1.66 | 5.08E-03 | transcription_start_site | + | 12115  | 12115  | -596  | 28141 | AN7250 |
| 780  | CONTIG124 | 45981  | 46415  | 1.96 | 0.00E+00 | transcription_start_site | - | 43071  | 43071  | -3127 | 28170 | AN7261 |
| 780  | CONTIG124 | 45981  | 46415  | 1.96 | 0.00E+00 | transcription_start_site | - | 42946  | 42946  | -3252 | 28171 | AN7261 |
| 1121 | CONTIG124 | 50251  | 50525  | 1.59 | 7.08E-03 | transcription_start_site | - | 48831  | 48831  | -1557 | 28172 | AN7262 |
| 1121 | CONTIG124 | 50251  | 50525  | 1.59 | 7.08E-03 | transcription_start_site | - | 48738  | 48738  | -1650 | 28173 | AN7262 |
| 1494 | CONTIG125 | 7352   | 7636   | 1.28 | 4.78E-02 | transcription_start_site | - | 4406   | 4406   | -3088 | 28176 | AN7264 |
| 1494 | CONTIG125 | 7352   | 7636   | 1.28 | 4.78E-02 | transcription_start_site | + | 7160   | 7160   | 334   | 28182 | AN7266 |
| 1494 | CONTIG125 | 7352   | 7636   | 1.28 | 4.78E-02 | transcription_start_site | + | 7014   | 7014   | 480   | 28181 | AN7266 |
| 903  | CONTIG125 | 11857  | 12366  | 1.82 | 3.81E-03 | transcription_start_site | - | 9221   | 9221   | -2890 | 28183 | AN7267 |
| 2169 | CONTIG125 | 13802  | 14752  | 0.82 | 1.23E-01 | transcription_start_site | - | 9221   | 9221   | -5056 | 28183 | AN7267 |

|      |           |       |       |      |          |                          |   |       |       |       |       |        |
|------|-----------|-------|-------|------|----------|--------------------------|---|-------|-------|-------|-------|--------|
| 1494 | CONTIG125 | 7352  | 7636  | 1.28 | 4.78E-02 | transcription_start_site | + | 9426  | 9426  | -1932 | 28184 | AN7268 |
| 1494 | CONTIG125 | 7352  | 7636  | 1.28 | 4.78E-02 | transcription_start_site | + | 9501  | 9501  | -2007 | 28185 | AN7268 |
| 903  | CONTIG125 | 11857 | 12366 | 1.82 | 3.81E-03 | transcription_start_site | - | 11871 | 11871 | -240  | 28186 | AN7269 |
| 903  | CONTIG125 | 11857 | 12366 | 1.82 | 3.81E-03 | transcription_start_site | - | 11532 | 11532 | -579  | 28187 | AN7269 |
| 903  | CONTIG125 | 11857 | 12366 | 1.82 | 3.81E-03 | transcription_start_site | - | 10658 | 10658 | -1453 | 28188 | AN7269 |
| 903  | CONTIG125 | 11857 | 12366 | 1.82 | 3.81E-03 | transcription_start_site | - | 10392 | 10392 | -1719 | 28189 | AN7269 |
| 2169 | CONTIG125 | 13802 | 14752 | 0.82 | 1.23E-01 | transcription_start_site | - | 11871 | 11871 | -2406 | 28186 | AN7269 |
| 2169 | CONTIG125 | 13802 | 14752 | 0.82 | 1.23E-01 | transcription_start_site | - | 11532 | 11532 | -2745 | 28187 | AN7269 |
| 2169 | CONTIG125 | 13802 | 14752 | 0.82 | 1.23E-01 | transcription_start_site | - | 10658 | 10658 | -3619 | 28188 | AN7269 |
| 2169 | CONTIG125 | 13802 | 14752 | 0.82 | 1.23E-01 | transcription_start_site | - | 10392 | 10392 | -3885 | 28189 | AN7269 |
| 903  | CONTIG125 | 11857 | 12366 | 1.82 | 3.81E-03 | transcription_start_site | + | 12943 | 12943 | -831  | 28190 | AN7270 |
| 903  | CONTIG125 | 11857 | 12366 | 1.82 | 3.81E-03 | transcription_start_site | + | 13353 | 13353 | -1241 | 28191 | AN7270 |
| 903  | CONTIG125 | 11857 | 12366 | 1.82 | 3.81E-03 | transcription_start_site | + | 13500 | 13500 | -1388 | 28192 | AN7270 |
| 2169 | CONTIG125 | 13802 | 14752 | 0.82 | 1.23E-01 | transcription_start_site | + | 13500 | 13500 | 777   | 28192 | AN7270 |
| 2169 | CONTIG125 | 13802 | 14752 | 0.82 | 1.23E-01 | transcription_start_site | + | 13353 | 13353 | 924   | 28191 | AN7270 |
| 2169 | CONTIG125 | 13802 | 14752 | 0.82 | 1.23E-01 | transcription_start_site | + | 12943 | 12943 | 1334  | 28190 | AN7270 |
| 903  | CONTIG125 | 11857 | 12366 | 1.82 | 3.81E-03 | transcription_start_site | + | 14976 | 14976 | -2864 | 28193 | AN7271 |
| 903  | CONTIG125 | 11857 | 12366 | 1.82 | 3.81E-03 | transcription_start_site | + | 15760 | 15760 | -3648 | 28194 | AN7271 |
| 2169 | CONTIG125 | 13802 | 14752 | 0.82 | 1.23E-01 | transcription_start_site | + | 14976 | 14976 | -699  | 28193 | AN7271 |
| 2169 | CONTIG125 | 13802 | 14752 | 0.82 | 1.23E-01 | transcription_start_site | + | 15760 | 15760 | -1483 | 28194 | AN7271 |
| 581  | CONTIG125 | 22579 | 22933 | 2.21 | 1.45E-03 | transcription_start_site | - | 19057 | 19057 | -3699 | 28195 | AN7272 |
| 581  | CONTIG125 | 22579 | 22933 | 2.21 | 1.45E-03 | transcription_start_site | - | 18923 | 18923 | -3833 | 28196 | AN7272 |
| 581  | CONTIG125 | 22579 | 22933 | 2.21 | 1.45E-03 | transcription_start_site | - | 18475 | 18475 | -4281 | 28197 | AN7272 |
| 581  | CONTIG125 | 22579 | 22933 | 2.21 | 1.45E-03 | transcription_start_site | - | 18090 | 18090 | -4666 | 28198 | AN7272 |
| 581  | CONTIG125 | 22579 | 22933 | 2.21 | 1.45E-03 | transcription_start_site | - | 17918 | 17918 | -4838 | 28199 | AN7272 |
| 581  | CONTIG125 | 22579 | 22933 | 2.21 | 1.45E-03 | transcription_start_site | - | 17689 | 17689 | -5067 | 28200 | AN7272 |
| 581  | CONTIG125 | 22579 | 22933 | 2.21 | 1.45E-03 | transcription_start_site | - | 22093 | 22093 | -663  | 28204 | AN7273 |
| 581  | CONTIG125 | 22579 | 22933 | 2.21 | 1.45E-03 | transcription_start_site | + | 26059 | 26059 | -3303 | 28205 | AN7274 |
| 581  | CONTIG125 | 22579 | 22933 | 2.21 | 1.45E-03 | transcription_start_site | + | 26970 | 26970 | -4214 | 28206 | AN7274 |
| 581  | CONTIG125 | 22579 | 22933 | 2.21 | 1.45E-03 | transcription_start_site | + | 27418 | 27418 | -4662 | 28207 | AN7274 |
| 1211 | CONTIG126 | 19201 | 19638 | 1.51 | 8.35E-04 | transcription_start_site | + | 20056 | 20056 | -636  | 28211 | AN7278 |
| 1211 | CONTIG126 | 19201 | 19638 | 1.51 | 8.35E-04 | transcription_start_site | + | 20332 | 20332 | -912  | 28212 | AN7278 |
| 1211 | CONTIG126 | 19201 | 19638 | 1.51 | 8.35E-04 | transcription_start_site | + | 20411 | 20411 | -991  | 28213 | AN7278 |
| 1211 | CONTIG126 | 19201 | 19638 | 1.51 | 8.35E-04 | transcription_start_site | + | 21127 | 21127 | -1707 | 28214 | AN7278 |
| 1211 | CONTIG126 | 19201 | 19638 | 1.51 | 8.35E-04 | transcription_start_site | + | 21747 | 21747 | -2327 | 28215 | AN7278 |
| 449  | CONTIG127 | 9167  | 9741  | 2.38 | 0.00E+00 | transcription_start_site | - | 8380  | 8380  | -1074 | 28238 | AN7286 |
| 449  | CONTIG127 | 9167  | 9741  | 2.38 | 0.00E+00 | transcription_start_site | - | 7601  | 7601  | -1853 | 28239 | AN7286 |
| 449  | CONTIG127 | 9167  | 9741  | 2.38 | 0.00E+00 | transcription_start_site | - | 7461  | 7461  | -1993 | 28240 | AN7286 |
| 2318 | CONTIG127 | 10807 | 11698 | 0.64 | 1.05E-01 | transcription_start_site | - | 8380  | 8380  | -2872 | 28238 | AN7286 |
| 2318 | CONTIG127 | 10807 | 11698 | 0.64 | 1.05E-01 | transcription_start_site | - | 7601  | 7601  | -3651 | 28239 | AN7286 |
| 2318 | CONTIG127 | 10807 | 11698 | 0.64 | 1.05E-01 | transcription_start_site | - | 7461  | 7461  | -3791 | 28240 | AN7286 |
| 449  | CONTIG127 | 9167  | 9741  | 2.38 | 0.00E+00 | transcription_start_site | + | 10527 | 10527 | -1073 | 28241 | AN7287 |
| 449  | CONTIG127 | 9167  | 9741  | 2.38 | 0.00E+00 | transcription_start_site | + | 10694 | 10694 | -1240 | 28242 | AN7287 |
| 2318 | CONTIG127 | 10807 | 11698 | 0.64 | 1.05E-01 | transcription_start_site | + | 10694 | 10694 | 558   | 28242 | AN7287 |
| 2318 | CONTIG127 | 10807 | 11698 | 0.64 | 1.05E-01 | transcription_start_site | + | 10527 | 10527 | 725   | 28241 | AN7287 |
| 2319 | CONTIG127 | 18764 | 19644 | 0.64 | 1.05E-01 | transcription_start_site | - | 15649 | 15649 | -3555 | 28243 | AN7288 |
| 2319 | CONTIG127 | 18764 | 19644 | 0.64 | 1.05E-01 | transcription_start_site | - | 14588 | 14588 | -4616 | 28244 | AN7288 |
| 2319 | CONTIG127 | 18764 | 19644 | 0.64 | 1.05E-01 | transcription_start_site | + | 18576 | 18576 | 628   | 28248 | AN7289 |
| 2319 | CONTIG127 | 18764 | 19644 | 0.64 | 1.05E-01 | transcription_start_site | + | 18274 | 18274 | 930   | 28247 | AN7289 |
| 2319 | CONTIG127 | 18764 | 19644 | 0.64 | 1.05E-01 | transcription_start_site | - | 19227 | 19227 | 23    | 28249 | AN7290 |
| 2319 | CONTIG127 | 18764 | 19644 | 0.64 | 1.05E-01 | transcription_start_site | + | 19659 | 19659 | -455  | 28250 | AN7291 |
| 2319 | CONTIG127 | 18764 | 19644 | 0.64 | 1.05E-01 | transcription_start_site | + | 19735 | 19735 | -531  | 28251 | AN7291 |
| 2319 | CONTIG127 | 18764 | 19644 | 0.64 | 1.05E-01 | transcription_start_site | + | 20241 | 20241 | -1037 | 28252 | AN7291 |
| 2319 | CONTIG127 | 18764 | 19644 | 0.64 | 1.05E-01 | transcription_start_site | + | 20379 | 20379 | -1175 | 28253 | AN7291 |
| 2319 | CONTIG127 | 18764 | 19644 | 0.64 | 1.05E-01 | transcription_start_site | + | 21171 | 21171 | -1967 | 28254 | AN7292 |
| 2319 | CONTIG127 | 18764 | 19644 | 0.64 | 1.05E-01 | transcription_start_site | + | 21381 | 21381 | -2177 | 28255 | AN7292 |
| 2319 | CONTIG127 | 18764 | 19644 | 0.64 | 1.05E-01 | transcription_start_site | + | 21846 | 21846 | -2642 | 28256 | AN7292 |

|      |           |       |       |      |          |                          |   |       |       |       |       |        |
|------|-----------|-------|-------|------|----------|--------------------------|---|-------|-------|-------|-------|--------|
| 2319 | CONTIG127 | 18764 | 19644 | 0.64 | 1.05E-01 | transcription_start_site | + | 22252 | 22252 | -3048 | 28257 | AN7292 |
| 2319 | CONTIG127 | 18764 | 19644 | 0.64 | 1.05E-01 | transcription_start_site | + | 22363 | 22363 | -3159 | 28258 | AN7292 |
| 1018 | CONTIG127 | 28890 | 29464 | 1.7  | 0.00E+00 | transcription_start_site | - | 24234 | 24234 | -4943 | 28259 | AN7293 |
| 1937 | CONTIG127 | 24470 | 24751 | 0.98 | 4.20E-02 | transcription_start_site | - | 24234 | 24234 | -376  | 28259 | AN7293 |
| 1937 | CONTIG127 | 24470 | 24751 | 0.98 | 4.20E-02 | transcription_start_site | - | 23799 | 23799 | -811  | 28260 | AN7293 |
| 1937 | CONTIG127 | 24470 | 24751 | 0.98 | 4.20E-02 | transcription_start_site | - | 23677 | 23677 | -933  | 28261 | AN7293 |
| 1937 | CONTIG127 | 24470 | 24751 | 0.98 | 4.20E-02 | transcription_start_site | - | 23502 | 23502 | -1108 | 28262 | AN7293 |
| 2224 | CONTIG127 | 26110 | 26544 | 0.77 | 1.08E-01 | transcription_start_site | - | 24234 | 24234 | -2093 | 28259 | AN7293 |
| 2224 | CONTIG127 | 26110 | 26544 | 0.77 | 1.08E-01 | transcription_start_site | - | 23799 | 23799 | -2528 | 28260 | AN7293 |
| 2224 | CONTIG127 | 26110 | 26544 | 0.77 | 1.08E-01 | transcription_start_site | - | 23677 | 23677 | -2650 | 28261 | AN7293 |
| 2224 | CONTIG127 | 26110 | 26544 | 0.77 | 1.08E-01 | transcription_start_site | - | 23502 | 23502 | -2825 | 28262 | AN7293 |
| 1937 | CONTIG127 | 24470 | 24751 | 0.98 | 4.20E-02 | transcription_start_site | + | 26504 | 26504 | -1893 | 28263 | AN7294 |
| 1937 | CONTIG127 | 24470 | 24751 | 0.98 | 4.20E-02 | transcription_start_site | + | 26863 | 26863 | -2252 | 28264 | AN7294 |
| 2224 | CONTIG127 | 26110 | 26544 | 0.77 | 1.08E-01 | transcription_start_site | + | 26504 | 26504 | -177  | 28263 | AN7294 |
| 2224 | CONTIG127 | 26110 | 26544 | 0.77 | 1.08E-01 | transcription_start_site | + | 26863 | 26863 | -536  | 28264 | AN7294 |
| 1018 | CONTIG127 | 28890 | 29464 | 1.7  | 0.00E+00 | transcription_start_site | + | 30032 | 30032 | -855  | 28265 | AN7295 |
| 1018 | CONTIG127 | 28890 | 29464 | 1.7  | 0.00E+00 | transcription_start_site | + | 30816 | 30816 | -1639 | 28266 | AN7295 |
| 2224 | CONTIG127 | 26110 | 26544 | 0.77 | 1.08E-01 | transcription_start_site | + | 30032 | 30032 | -3705 | 28265 | AN7295 |
| 2224 | CONTIG127 | 26110 | 26544 | 0.77 | 1.08E-01 | transcription_start_site | + | 30816 | 30816 | -4489 | 28266 | AN7295 |
| 1018 | CONTIG127 | 28890 | 29464 | 1.7  | 0.00E+00 | transcription_start_site | + | 32188 | 32188 | -3011 | 28267 | AN7296 |
| 1018 | CONTIG127 | 28890 | 29464 | 1.7  | 0.00E+00 | transcription_start_site | + | 32620 | 32620 | -3443 | 28268 | AN7296 |
| 1018 | CONTIG127 | 28890 | 29464 | 1.7  | 0.00E+00 | transcription_start_site | + | 34344 | 34344 | -5167 | 28269 | AN7296 |
| 1764 | CONTIG127 | 41485 | 41769 | 1.09 | 2.63E-02 | transcription_start_site | - | 40840 | 40840 | -787  | 28270 | AN7297 |
| 1764 | CONTIG127 | 41485 | 41769 | 1.09 | 2.63E-02 | transcription_start_site | - | 38650 | 38650 | -2977 | 28271 | AN7297 |
| 2199 | CONTIG127 | 42470 | 43709 | 0.79 | 5.49E-02 | transcription_start_site | - | 40840 | 40840 | -2249 | 28270 | AN7297 |
| 2199 | CONTIG127 | 42470 | 43709 | 0.79 | 5.49E-02 | transcription_start_site | - | 38650 | 38650 | -4439 | 28271 | AN7297 |
| 1764 | CONTIG127 | 41485 | 41769 | 1.09 | 2.63E-02 | transcription_start_site | - | 41848 | 41848 | 221   | 28274 | AN7298 |
| 1764 | CONTIG127 | 41485 | 41769 | 1.09 | 2.63E-02 | transcription_start_site | - | 41958 | 41958 | 331   | 28273 | AN7298 |
| 2199 | CONTIG127 | 42470 | 43709 | 0.79 | 5.49E-02 | transcription_start_site | - | 43015 | 43015 | -74   | 28272 | AN7298 |
| 2199 | CONTIG127 | 42470 | 43709 | 0.79 | 5.49E-02 | transcription_start_site | - | 41958 | 41958 | -1131 | 28273 | AN7298 |
| 2199 | CONTIG127 | 42470 | 43709 | 0.79 | 5.49E-02 | transcription_start_site | - | 41848 | 41848 | -1241 | 28274 | AN7298 |
| 1764 | CONTIG127 | 41485 | 41769 | 1.09 | 2.63E-02 | transcription_start_site | + | 43862 | 43862 | -2235 | 28275 | AN7299 |
| 1764 | CONTIG127 | 41485 | 41769 | 1.09 | 2.63E-02 | transcription_start_site | + | 44147 | 44147 | -2520 | 28276 | AN7299 |
| 1764 | CONTIG127 | 41485 | 41769 | 1.09 | 2.63E-02 | transcription_start_site | + | 44304 | 44304 | -2677 | 28277 | AN7299 |
| 1764 | CONTIG127 | 41485 | 41769 | 1.09 | 2.63E-02 | transcription_start_site | + | 44488 | 44488 | -2861 | 28278 | AN7299 |
| 1764 | CONTIG127 | 41485 | 41769 | 1.09 | 2.63E-02 | transcription_start_site | + | 45363 | 45363 | -3736 | 28279 | AN7299 |
| 2199 | CONTIG127 | 42470 | 43709 | 0.79 | 5.49E-02 | transcription_start_site | + | 43862 | 43862 | -772  | 28275 | AN7299 |
| 2199 | CONTIG127 | 42470 | 43709 | 0.79 | 5.49E-02 | transcription_start_site | + | 44147 | 44147 | -1057 | 28276 | AN7299 |
| 2199 | CONTIG127 | 42470 | 43709 | 0.79 | 5.49E-02 | transcription_start_site | + | 44304 | 44304 | -1214 | 28277 | AN7299 |
| 2199 | CONTIG127 | 42470 | 43709 | 0.79 | 5.49E-02 | transcription_start_site | + | 44488 | 44488 | -1398 | 28278 | AN7299 |
| 2199 | CONTIG127 | 42470 | 43709 | 0.79 | 5.49E-02 | transcription_start_site | + | 45363 | 45363 | -2273 | 28279 | AN7299 |
| 2199 | CONTIG127 | 42470 | 43709 | 0.79 | 5.49E-02 | transcription_start_site | + | 48468 | 48468 | -5378 | 28280 | AN7300 |
| 2015 | CONTIG127 | 56251 | 56530 | 0.93 | 5.36E-02 | transcription_start_site | - | 53920 | 53920 | -2470 | 28283 | AN7301 |
| 2015 | CONTIG127 | 56251 | 56530 | 0.93 | 5.36E-02 | transcription_start_site | - | 53757 | 53757 | -2633 | 28284 | AN7301 |
| 2015 | CONTIG127 | 56251 | 56530 | 0.93 | 5.36E-02 | transcription_start_site | - | 53618 | 53618 | -2772 | 28285 | AN7301 |
| 2015 | CONTIG127 | 56251 | 56530 | 0.93 | 5.36E-02 | transcription_start_site | - | 53375 | 53375 | -3015 | 28286 | AN7301 |
| 2015 | CONTIG127 | 56251 | 56530 | 0.93 | 5.36E-02 | transcription_start_site | - | 52831 | 52831 | -3559 | 28287 | AN7301 |
| 2015 | CONTIG127 | 56251 | 56530 | 0.93 | 5.36E-02 | transcription_start_site | - | 52642 | 52642 | -3748 | 28288 | AN7301 |
| 2015 | CONTIG127 | 56251 | 56530 | 0.93 | 5.36E-02 | transcription_start_site | - | 51984 | 51984 | -4406 | 28289 | AN7301 |
| 2015 | CONTIG127 | 56251 | 56530 | 0.93 | 5.36E-02 | transcription_start_site | + | 55965 | 55965 | 425   | 28296 | AN7302 |
| 2015 | CONTIG127 | 56251 | 56530 | 0.93 | 5.36E-02 | transcription_start_site | + | 55376 | 55376 | 1014  | 28295 | AN7302 |
| 2015 | CONTIG127 | 56251 | 56530 | 0.93 | 5.36E-02 | transcription_start_site | + | 58660 | 58660 | -2269 | 28297 | AN7303 |
| 2015 | CONTIG127 | 56251 | 56530 | 0.93 | 5.36E-02 | transcription_start_site | + | 58730 | 58730 | -2339 | 28298 | AN7303 |
| 2015 | CONTIG127 | 56251 | 56530 | 0.93 | 5.36E-02 | transcription_start_site | + | 59057 | 59057 | -2666 | 28299 | AN7303 |
| 2015 | CONTIG127 | 56251 | 56530 | 0.93 | 5.36E-02 | transcription_start_site | + | 59217 | 59217 | -2826 | 28300 | AN7303 |
| 2015 | CONTIG127 | 56251 | 56530 | 0.93 | 5.36E-02 | transcription_start_site | + | 59293 | 59293 | -2902 | 28301 | AN7303 |
| 2015 | CONTIG127 | 56251 | 56530 | 0.93 | 5.36E-02 | transcription_start_site | + | 60953 | 60953 | -4562 | 28302 | AN7303 |

|      |           |       |       |      |          |                          |   |       |       |       |       |        |
|------|-----------|-------|-------|------|----------|--------------------------|---|-------|-------|-------|-------|--------|
| 1650 | CONTIG127 | 62557 | 62981 | 1.17 | 1.80E-02 | transcription_start_site | + | 62980 | 62980 | -211  | 28303 | AN7304 |
| 1650 | CONTIG127 | 62557 | 62981 | 1.17 | 1.80E-02 | transcription_start_site | + | 63365 | 63365 | -596  | 28304 | AN7304 |
| 1650 | CONTIG127 | 62557 | 62981 | 1.17 | 1.80E-02 | transcription_start_site | + | 64946 | 64946 | -2177 | 28305 | AN7305 |
| 1650 | CONTIG127 | 62557 | 62981 | 1.17 | 1.80E-02 | transcription_start_site | + | 65671 | 65671 | -2902 | 28306 | AN7305 |
| 1410 | CONTIG128 | 10809 | 11313 | 1.34 | 2.29E-02 | transcription_start_site | - | 10136 | 10136 | -925  | 28403 | AN7335 |
| 1410 | CONTIG128 | 10809 | 11313 | 1.34 | 2.29E-02 | transcription_start_site | - | 9152  | 9152  | -1909 | 28404 | AN7335 |
| 1410 | CONTIG128 | 10809 | 11313 | 1.34 | 2.29E-02 | transcription_start_site | + | 12006 | 12006 | -945  | 28405 | AN7336 |
| 177  | CONTIG128 | 25431 | 25931 | 2.88 | 0.00E+00 | transcription_start_site | - | 22482 | 22482 | -3199 | 28408 | AN7340 |
| 177  | CONTIG128 | 25431 | 25931 | 2.88 | 0.00E+00 | transcription_start_site | - | 22259 | 22259 | -3422 | 28409 | AN7340 |
| 177  | CONTIG128 | 25431 | 25931 | 2.88 | 0.00E+00 | transcription_start_site | - | 21486 | 21486 | -4195 | 28410 | AN7340 |
| 177  | CONTIG128 | 25431 | 25931 | 2.88 | 0.00E+00 | transcription_start_site | - | 21350 | 21350 | -4331 | 28411 | AN7340 |
| 177  | CONTIG128 | 25431 | 25931 | 2.88 | 0.00E+00 | transcription_start_site | - | 21205 | 21205 | -4476 | 28412 | AN7340 |
| 177  | CONTIG128 | 25431 | 25931 | 2.88 | 0.00E+00 | transcription_start_site | - | 21017 | 21017 | -4664 | 28413 | AN7340 |
| 1918 | CONTIG128 | 26256 | 26535 | 0.99 | 8.63E-02 | transcription_start_site | - | 22482 | 22482 | -3913 | 28408 | AN7340 |
| 1918 | CONTIG128 | 26256 | 26535 | 0.99 | 8.63E-02 | transcription_start_site | - | 22259 | 22259 | -4136 | 28409 | AN7340 |
| 1918 | CONTIG128 | 26256 | 26535 | 0.99 | 8.63E-02 | transcription_start_site | - | 21486 | 21486 | -4909 | 28410 | AN7340 |
| 1918 | CONTIG128 | 26256 | 26535 | 0.99 | 8.63E-02 | transcription_start_site | - | 21350 | 21350 | -5045 | 28411 | AN7340 |
| 177  | CONTIG128 | 25431 | 25931 | 2.88 | 0.00E+00 | transcription_start_site | - | 24966 | 24966 | -715  | 28414 | AN7341 |
| 177  | CONTIG128 | 25431 | 25931 | 2.88 | 0.00E+00 | transcription_start_site | - | 24691 | 24691 | -990  | 28415 | AN7341 |
| 177  | CONTIG128 | 25431 | 25931 | 2.88 | 0.00E+00 | transcription_start_site | - | 24508 | 24508 | -1173 | 28416 | AN7341 |
| 177  | CONTIG128 | 25431 | 25931 | 2.88 | 0.00E+00 | transcription_start_site | - | 24414 | 24414 | -1267 | 28417 | AN7341 |
| 177  | CONTIG128 | 25431 | 25931 | 2.88 | 0.00E+00 | transcription_start_site | - | 24336 | 24336 | -1345 | 28418 | AN7341 |
| 177  | CONTIG128 | 25431 | 25931 | 2.88 | 0.00E+00 | transcription_start_site | - | 23929 | 23929 | -1752 | 28419 | AN7341 |
| 1918 | CONTIG128 | 26256 | 26535 | 0.99 | 8.63E-02 | transcription_start_site | - | 24966 | 24966 | -1429 | 28414 | AN7341 |
| 1918 | CONTIG128 | 26256 | 26535 | 0.99 | 8.63E-02 | transcription_start_site | - | 24691 | 24691 | -1704 | 28415 | AN7341 |
| 1918 | CONTIG128 | 26256 | 26535 | 0.99 | 8.63E-02 | transcription_start_site | - | 24508 | 24508 | -1887 | 28416 | AN7341 |
| 1918 | CONTIG128 | 26256 | 26535 | 0.99 | 8.63E-02 | transcription_start_site | - | 24414 | 24414 | -1981 | 28417 | AN7341 |
| 1918 | CONTIG128 | 26256 | 26535 | 0.99 | 8.63E-02 | transcription_start_site | - | 24336 | 24336 | -2059 | 28418 | AN7341 |
| 1918 | CONTIG128 | 26256 | 26535 | 0.99 | 8.63E-02 | transcription_start_site | - | 23929 | 23929 | -2466 | 28419 | AN7341 |
| 177  | CONTIG128 | 25431 | 25931 | 2.88 | 0.00E+00 | transcription_start_site | + | 27287 | 27287 | -1606 | 28420 | AN7342 |
| 177  | CONTIG128 | 25431 | 25931 | 2.88 | 0.00E+00 | transcription_start_site | + | 27520 | 27520 | -1839 | 28421 | AN7342 |
| 177  | CONTIG128 | 25431 | 25931 | 2.88 | 0.00E+00 | transcription_start_site | + | 28666 | 28666 | -2985 | 28422 | AN7342 |
| 177  | CONTIG128 | 25431 | 25931 | 2.88 | 0.00E+00 | transcription_start_site | + | 29088 | 29088 | -3407 | 28423 | AN7342 |
| 1918 | CONTIG128 | 26256 | 26535 | 0.99 | 8.63E-02 | transcription_start_site | + | 27287 | 27287 | -891  | 28420 | AN7342 |
| 1918 | CONTIG128 | 26256 | 26535 | 0.99 | 8.63E-02 | transcription_start_site | + | 27520 | 27520 | -1124 | 28421 | AN7342 |
| 1918 | CONTIG128 | 26256 | 26535 | 0.99 | 8.63E-02 | transcription_start_site | + | 28666 | 28666 | -2270 | 28422 | AN7342 |
| 1918 | CONTIG128 | 26256 | 26535 | 0.99 | 8.63E-02 | transcription_start_site | + | 29088 | 29088 | -2692 | 28423 | AN7342 |
| 1833 | CONTIG128 | 48321 | 48665 | 1.05 | 6.74E-02 | transcription_start_site | - | 44561 | 44561 | -3932 | 28434 | AN7346 |
| 1833 | CONTIG128 | 48321 | 48665 | 1.05 | 6.74E-02 | transcription_start_site | - | 43737 | 43737 | -4756 | 28435 | AN7346 |
| 1833 | CONTIG128 | 48321 | 48665 | 1.05 | 6.74E-02 | transcription_start_site | + | 47803 | 47803 | 690   | 28438 | AN7347 |
| 1833 | CONTIG128 | 48321 | 48665 | 1.05 | 6.74E-02 | transcription_start_site | + | 47507 | 47507 | 986   | 28437 | AN7347 |
| 1833 | CONTIG128 | 48321 | 48665 | 1.05 | 6.74E-02 | transcription_start_site | + | 49182 | 49182 | -689  | 28439 | AN7348 |
| 2195 | CONTIG128 | 63078 | 63367 | 0.8  | 1.76E-01 | transcription_start_site | + | 63430 | 63430 | -207  | 28450 | AN7350 |
| 2195 | CONTIG128 | 63078 | 63367 | 0.8  | 1.76E-01 | transcription_start_site | + | 63529 | 63529 | -306  | 28451 | AN7350 |
| 2195 | CONTIG128 | 63078 | 63367 | 0.8  | 1.76E-01 | transcription_start_site | + | 63642 | 63642 | -419  | 28452 | AN7350 |
| 2195 | CONTIG128 | 63078 | 63367 | 0.8  | 1.76E-01 | transcription_start_site | + | 63821 | 63821 | -598  | 28453 | AN7350 |
| 2195 | CONTIG128 | 63078 | 63367 | 0.8  | 1.76E-01 | transcription_start_site | + | 63956 | 63956 | -733  | 28454 | AN7350 |
| 2195 | CONTIG128 | 63078 | 63367 | 0.8  | 1.76E-01 | transcription_start_site | + | 64287 | 64287 | -1064 | 28455 | AN7350 |
| 2195 | CONTIG128 | 63078 | 63367 | 0.8  | 1.76E-01 | transcription_start_site | + | 67667 | 67667 | -4444 | 28456 | AN7351 |
| 2195 | CONTIG128 | 63078 | 63367 | 0.8  | 1.76E-01 | transcription_start_site | + | 67885 | 67885 | -4662 | 28457 | AN7351 |
| 2195 | CONTIG128 | 63078 | 63367 | 0.8  | 1.76E-01 | transcription_start_site | + | 67971 | 67971 | -4748 | 28458 | AN7351 |
| 2195 | CONTIG128 | 63078 | 63367 | 0.8  | 1.76E-01 | transcription_start_site | + | 68109 | 68109 | -4886 | 28459 | AN7351 |
| 2195 | CONTIG128 | 63078 | 63367 | 0.8  | 1.76E-01 | transcription_start_site | + | 68210 | 68210 | -4987 | 28460 | AN7351 |
| 1148 | CONTIG128 | 82810 | 83164 | 1.57 | 9.96E-03 | transcription_start_site | - | 82147 | 82147 | -840  | 28477 | AN7357 |
| 1149 | CONTIG128 | 85895 | 86396 | 1.57 | 9.96E-03 | transcription_start_site | - | 82147 | 82147 | -3998 | 28477 | AN7357 |
| 1149 | CONTIG128 | 85895 | 86396 | 1.57 | 9.96E-03 | transcription_start_site | - | 85914 | 85914 | -231  | 28478 | AN7358 |
| 1149 | CONTIG128 | 85895 | 86396 | 1.57 | 9.96E-03 | transcription_start_site | - | 85276 | 85276 | -869  | 28479 | AN7358 |



|      |           |        |        |      |          |                          |   |        |        |       |       |        |
|------|-----------|--------|--------|------|----------|--------------------------|---|--------|--------|-------|-------|--------|
| 1149 | CONTIG128 | 85895  | 86396  | 1.57 | 9.96E-03 | transcription_start_site | - | 85075  | 85075  | -1070 | 28480 | AN7358 |
| 1331 | CONTIG128 | 100811 | 101320 | 1.41 | 1.80E-02 | transcription_start_site | - | 99087  | 99087  | -1978 | 28491 | AN7362 |
| 1331 | CONTIG128 | 100811 | 101320 | 1.41 | 1.80E-02 | transcription_start_site | - | 98758  | 98758  | -2307 | 28492 | AN7362 |
| 1331 | CONTIG128 | 100811 | 101320 | 1.41 | 1.80E-02 | transcription_start_site | - | 97928  | 97928  | -3137 | 28493 | AN7362 |
| 1331 | CONTIG128 | 100811 | 101320 | 1.41 | 1.80E-02 | transcription_start_site | - | 97625  | 97625  | -3440 | 28494 | AN7362 |
| 1331 | CONTIG128 | 100811 | 101320 | 1.41 | 1.80E-02 | transcription_start_site | - | 96518  | 96518  | -4547 | 28495 | AN7362 |
| 1331 | CONTIG128 | 100811 | 101320 | 1.41 | 1.80E-02 | transcription_start_site | - | 96135  | 96135  | -4930 | 28496 | AN7362 |
| 2123 | CONTIG128 | 102076 | 102453 | 0.86 | 1.38E-01 | transcription_start_site | - | 99087  | 99087  | -3177 | 28491 | AN7362 |
| 2123 | CONTIG128 | 102076 | 102453 | 0.86 | 1.38E-01 | transcription_start_site | - | 98758  | 98758  | -3506 | 28492 | AN7362 |
| 2123 | CONTIG128 | 102076 | 102453 | 0.86 | 1.38E-01 | transcription_start_site | - | 97928  | 97928  | -4336 | 28493 | AN7362 |
| 2123 | CONTIG128 | 102076 | 102453 | 0.86 | 1.38E-01 | transcription_start_site | - | 97625  | 97625  | -4639 | 28494 | AN7362 |
| 1331 | CONTIG128 | 100811 | 101320 | 1.41 | 1.80E-02 | transcription_start_site | + | 105549 | 105549 | -4483 | 28499 | AN7364 |
| 2123 | CONTIG128 | 102076 | 102453 | 0.86 | 1.38E-01 | transcription_start_site | + | 105549 | 105549 | -3284 | 28499 | AN7364 |
| 529  | CONTIG128 | 107561 | 108055 | 2.27 | 0.00E+00 | transcription_start_site | - | 107942 | 107942 | 134   | 28500 | AN7365 |
| 529  | CONTIG128 | 107561 | 108055 | 2.27 | 0.00E+00 | transcription_start_site | - | 107658 | 107658 | -150  | 28501 | AN7365 |
| 529  | CONTIG128 | 107561 | 108055 | 2.27 | 0.00E+00 | transcription_start_site | - | 107360 | 107360 | -448  | 28502 | AN7365 |
| 529  | CONTIG128 | 107561 | 108055 | 2.27 | 0.00E+00 | transcription_start_site | + | 108562 | 108562 | -754  | 28503 | AN7366 |
| 529  | CONTIG128 | 107561 | 108055 | 2.27 | 0.00E+00 | transcription_start_site | + | 108834 | 108834 | -1026 | 28504 | AN7366 |
| 529  | CONTIG128 | 107561 | 108055 | 2.27 | 0.00E+00 | transcription_start_site | + | 109296 | 109296 | -1488 | 28505 | AN7366 |
| 529  | CONTIG128 | 107561 | 108055 | 2.27 | 0.00E+00 | transcription_start_site | + | 109497 | 109497 | -1689 | 28506 | AN7366 |
| 1634 | CONTIG128 | 125946 | 126295 | 1.18 | 4.20E-02 | transcription_start_site | - | 123421 | 123421 | -2699 | 28512 | AN7370 |
| 1634 | CONTIG128 | 125946 | 126295 | 1.18 | 4.20E-02 | transcription_start_site | - | 123267 | 123267 | -2853 | 28513 | AN7370 |
| 1634 | CONTIG128 | 125946 | 126295 | 1.18 | 4.20E-02 | transcription_start_site | - | 122615 | 122615 | -3505 | 28514 | AN7370 |
| 1634 | CONTIG128 | 125946 | 126295 | 1.18 | 4.20E-02 | transcription_start_site | - | 122503 | 122503 | -3617 | 28515 | AN7370 |
| 1634 | CONTIG128 | 125946 | 126295 | 1.18 | 4.20E-02 | transcription_start_site | - | 122190 | 122190 | -3930 | 28516 | AN7370 |
| 1634 | CONTIG128 | 125946 | 126295 | 1.18 | 4.20E-02 | transcription_start_site | - | 122047 | 122047 | -4073 | 28517 | AN7370 |
| 1634 | CONTIG128 | 125946 | 126295 | 1.18 | 4.20E-02 | transcription_start_site | - | 121630 | 121630 | -4490 | 28518 | AN7370 |
| 1634 | CONTIG128 | 125946 | 126295 | 1.18 | 4.20E-02 | transcription_start_site | - | 121227 | 121227 | -4893 | 28519 | AN7370 |
| 1634 | CONTIG128 | 125946 | 126295 | 1.18 | 4.20E-02 | transcription_start_site | + | 125165 | 125165 | 955   | 28521 | AN7371 |
| 1492 | CONTIG128 | 135157 | 135661 | 1.28 | 3.01E-02 | transcription_start_site | - | 135149 | 135149 | -260  | 28525 | AN7374 |
| 1492 | CONTIG128 | 135157 | 135661 | 1.28 | 3.01E-02 | transcription_start_site | - | 134688 | 134688 | -721  | 28526 | AN7374 |
| 1492 | CONTIG128 | 135157 | 135661 | 1.28 | 3.01E-02 | transcription_start_site | + | 135576 | 135576 | -167  | 28527 | AN7375 |
| 1492 | CONTIG128 | 135157 | 135661 | 1.28 | 3.01E-02 | transcription_start_site | + | 135744 | 135744 | -335  | 28528 | AN7375 |
| 1492 | CONTIG128 | 135157 | 135661 | 1.28 | 3.01E-02 | transcription_start_site | + | 136915 | 136915 | -1506 | 28529 | AN7375 |
| 1492 | CONTIG128 | 135157 | 135661 | 1.28 | 3.01E-02 | transcription_start_site | + | 137082 | 137082 | -1673 | 28530 | AN7375 |
| 1492 | CONTIG128 | 135157 | 135661 | 1.28 | 3.01E-02 | transcription_start_site | + | 139292 | 139292 | -3883 | 28532 | AN7377 |
| 1492 | CONTIG128 | 135157 | 135661 | 1.28 | 3.01E-02 | transcription_start_site | + | 139361 | 139361 | -3952 | 28533 | AN7377 |
| 1492 | CONTIG128 | 135157 | 135661 | 1.28 | 3.01E-02 | transcription_start_site | + | 140595 | 140595 | -5186 | 28534 | AN7377 |
| 1635 | CONTIG128 | 156380 | 156739 | 1.18 | 4.20E-02 | transcription_start_site | - | 156023 | 156023 | -536  | 28548 | AN7383 |
| 1635 | CONTIG128 | 156380 | 156739 | 1.18 | 4.20E-02 | transcription_start_site | + | 158734 | 158734 | -2174 | 28549 | AN7384 |
| 1635 | CONTIG128 | 156380 | 156739 | 1.18 | 4.20E-02 | transcription_start_site | + | 158832 | 158832 | -2272 | 28550 | AN7384 |
| 1635 | CONTIG128 | 156380 | 156739 | 1.18 | 4.20E-02 | transcription_start_site | + | 159338 | 159338 | -2778 | 28551 | AN7384 |
| 1635 | CONTIG128 | 156380 | 156739 | 1.18 | 4.20E-02 | transcription_start_site | + | 159573 | 159573 | -3013 | 28552 | AN7384 |
| 1636 | CONTIG128 | 162611 | 162965 | 1.18 | 4.20E-02 | transcription_start_site | - | 160932 | 160932 | -1856 | 28553 | AN7385 |
| 1636 | CONTIG128 | 162611 | 162965 | 1.18 | 4.20E-02 | transcription_start_site | + | 162950 | 162950 | -162  | 28554 | AN7386 |
| 1636 | CONTIG128 | 162611 | 162965 | 1.18 | 4.20E-02 | transcription_start_site | + | 163436 | 163436 | -648  | 28555 | AN7386 |
| 1636 | CONTIG128 | 162611 | 162965 | 1.18 | 4.20E-02 | transcription_start_site | + | 163729 | 163729 | -941  | 28556 | AN7386 |
| 1636 | CONTIG128 | 162611 | 162965 | 1.18 | 4.20E-02 | transcription_start_site | + | 165783 | 165783 | -2995 | 28559 | AN7388 |
| 902  | CONTIG128 | 175144 | 175493 | 1.82 | 3.37E-03 | transcription_start_site | - | 172445 | 172445 | -2873 | 28560 | AN7389 |
| 902  | CONTIG128 | 175144 | 175493 | 1.82 | 3.37E-03 | transcription_start_site | - | 172133 | 172133 | -3185 | 28561 | AN7389 |
| 902  | CONTIG128 | 175144 | 175493 | 1.82 | 3.37E-03 | transcription_start_site | + | 175977 | 175977 | -658  | 28562 | AN7390 |
| 902  | CONTIG128 | 175144 | 175493 | 1.82 | 3.37E-03 | transcription_start_site | + | 176581 | 176581 | -1262 | 28563 | AN7390 |
| 902  | CONTIG128 | 175144 | 175493 | 1.82 | 3.37E-03 | transcription_start_site | + | 176786 | 176786 | -1467 | 28564 | AN7390 |
| 902  | CONTIG128 | 175144 | 175493 | 1.82 | 3.37E-03 | transcription_start_site | + | 179986 | 179986 | -4667 | 28568 | AN7392 |
| 902  | CONTIG128 | 175144 | 175493 | 1.82 | 3.37E-03 | transcription_start_site | + | 180110 | 180110 | -4791 | 28569 | AN7392 |
| 178  | CONTIG128 | 187802 | 188386 | 2.88 | 0.00E+00 | transcription_start_site | - | 187491 | 187491 | -603  | 28578 | AN7395 |
| 178  | CONTIG128 | 187802 | 188386 | 2.88 | 0.00E+00 | transcription_start_site | - | 187366 | 187366 | -728  | 28579 | AN7395 |

|      |           |        |        |      |          |                          |   |        |        |       |       |        |
|------|-----------|--------|--------|------|----------|--------------------------|---|--------|--------|-------|-------|--------|
| 178  | CONTIG128 | 187802 | 188386 | 2.88 | 0.00E+00 | transcription_start_site | - | 187177 | 187177 | -917  | 28580 | AN7395 |
| 178  | CONTIG128 | 187802 | 188386 | 2.88 | 0.00E+00 | transcription_start_site | - | 187094 | 187094 | -1000 | 28581 | AN7395 |
| 178  | CONTIG128 | 187802 | 188386 | 2.88 | 0.00E+00 | transcription_start_site | - | 186537 | 186537 | -1557 | 28582 | AN7395 |
| 178  | CONTIG128 | 187802 | 188386 | 2.88 | 0.00E+00 | transcription_start_site | - | 186417 | 186417 | -1677 | 28583 | AN7395 |
| 1919 | CONTIG128 | 191402 | 191826 | 0.99 | 8.63E-02 | transcription_start_site | - | 187491 | 187491 | -4123 | 28578 | AN7395 |
| 1919 | CONTIG128 | 191402 | 191826 | 0.99 | 8.63E-02 | transcription_start_site | - | 187366 | 187366 | -4248 | 28579 | AN7395 |
| 1919 | CONTIG128 | 191402 | 191826 | 0.99 | 8.63E-02 | transcription_start_site | - | 187177 | 187177 | -4437 | 28580 | AN7395 |
| 1919 | CONTIG128 | 191402 | 191826 | 0.99 | 8.63E-02 | transcription_start_site | - | 187094 | 187094 | -4520 | 28581 | AN7395 |
| 1919 | CONTIG128 | 191402 | 191826 | 0.99 | 8.63E-02 | transcription_start_site | - | 186537 | 186537 | -5077 | 28582 | AN7395 |
| 1919 | CONTIG128 | 191402 | 191826 | 0.99 | 8.63E-02 | transcription_start_site | - | 186417 | 186417 | -5197 | 28583 | AN7395 |
| 1919 | CONTIG128 | 191402 | 191826 | 0.99 | 8.63E-02 | transcription_start_site | + | 194683 | 194683 | -3069 | 28584 | AN7396 |
| 1919 | CONTIG128 | 191402 | 191826 | 0.99 | 8.63E-02 | transcription_start_site | + | 194870 | 194870 | -3256 | 28585 | AN7396 |
| 1919 | CONTIG128 | 191402 | 191826 | 0.99 | 8.63E-02 | transcription_start_site | + | 195130 | 195130 | -3516 | 28586 | AN7396 |
| 1919 | CONTIG128 | 191402 | 191826 | 0.99 | 8.63E-02 | transcription_start_site | + | 195241 | 195241 | -3627 | 28587 | AN7396 |
| 1919 | CONTIG128 | 191402 | 191826 | 0.99 | 8.63E-02 | transcription_start_site | + | 195516 | 195516 | -3902 | 28588 | AN7396 |
| 1919 | CONTIG128 | 191402 | 191826 | 0.99 | 8.63E-02 | transcription_start_site | + | 195822 | 195822 | -4208 | 28589 | AN7396 |
| 1919 | CONTIG128 | 191402 | 191826 | 0.99 | 8.63E-02 | transcription_start_site | + | 196039 | 196039 | -4425 | 28590 | AN7396 |
| 2023 | CONTIG128 | 203720 | 204064 | 0.93 | 1.08E-01 | transcription_start_site | - | 200398 | 200398 | -3494 | 28591 | AN7397 |
| 2023 | CONTIG128 | 203720 | 204064 | 0.93 | 1.08E-01 | transcription_start_site | - | 200069 | 200069 | -3823 | 28592 | AN7397 |
| 2023 | CONTIG128 | 203720 | 204064 | 0.93 | 1.08E-01 | transcription_start_site | - | 203385 | 203385 | -507  | 28594 | AN7398 |
| 2023 | CONTIG128 | 203720 | 204064 | 0.93 | 1.08E-01 | transcription_start_site | - | 203189 | 203189 | -703  | 28595 | AN7398 |
| 2023 | CONTIG128 | 203720 | 204064 | 0.93 | 1.08E-01 | transcription_start_site | - | 203122 | 203122 | -770  | 28596 | AN7398 |
| 2023 | CONTIG128 | 203720 | 204064 | 0.93 | 1.08E-01 | transcription_start_site | - | 202889 | 202889 | -1003 | 28597 | AN7398 |
| 2023 | CONTIG128 | 203720 | 204064 | 0.93 | 1.08E-01 | transcription_start_site | - | 202701 | 202701 | -1191 | 28598 | AN7398 |
| 2023 | CONTIG128 | 203720 | 204064 | 0.93 | 1.08E-01 | transcription_start_site | - | 202649 | 202649 | -1243 | 28599 | AN7398 |
| 2023 | CONTIG128 | 203720 | 204064 | 0.93 | 1.08E-01 | transcription_start_site | - | 202374 | 202374 | -1518 | 28600 | AN7398 |
| 1834 | CONTIG128 | 209262 | 209752 | 1.05 | 6.74E-02 | transcription_start_site | - | 206578 | 206578 | -2929 | 28601 | AN7399 |
| 1834 | CONTIG128 | 209262 | 209752 | 1.05 | 6.74E-02 | transcription_start_site | - | 205464 | 205464 | -4043 | 28602 | AN7399 |
| 2257 | CONTIG128 | 210087 | 210661 | 0.73 | 1.57E-01 | transcription_start_site | - | 206578 | 206578 | -3796 | 28601 | AN7399 |
| 2257 | CONTIG128 | 210087 | 210661 | 0.73 | 1.57E-01 | transcription_start_site | - | 205464 | 205464 | -4910 | 28602 | AN7399 |
| 1834 | CONTIG128 | 209262 | 209752 | 1.05 | 6.74E-02 | transcription_start_site | + | 209436 | 209436 | 71    | 28607 | AN7400 |
| 1834 | CONTIG128 | 209262 | 209752 | 1.05 | 6.74E-02 | transcription_start_site | + | 209738 | 209738 | -231  | 28608 | AN7400 |
| 1834 | CONTIG128 | 209262 | 209752 | 1.05 | 6.74E-02 | transcription_start_site | + | 209266 | 209266 | 241   | 28606 | AN7400 |
| 1834 | CONTIG128 | 209262 | 209752 | 1.05 | 6.74E-02 | transcription_start_site | + | 209087 | 209087 | 420   | 28605 | AN7400 |
| 1834 | CONTIG128 | 209262 | 209752 | 1.05 | 6.74E-02 | transcription_start_site | + | 208781 | 208781 | 726   | 28604 | AN7400 |
| 1834 | CONTIG128 | 209262 | 209752 | 1.05 | 6.74E-02 | transcription_start_site | + | 210332 | 210332 | -825  | 28609 | AN7400 |
| 1834 | CONTIG128 | 209262 | 209752 | 1.05 | 6.74E-02 | transcription_start_site | + | 208326 | 208326 | 1181  | 28603 | AN7400 |
| 2023 | CONTIG128 | 203720 | 204064 | 0.93 | 1.08E-01 | transcription_start_site | + | 208326 | 208326 | -4434 | 28603 | AN7400 |
| 2023 | CONTIG128 | 203720 | 204064 | 0.93 | 1.08E-01 | transcription_start_site | + | 208781 | 208781 | -4889 | 28604 | AN7400 |
| 2257 | CONTIG128 | 210087 | 210661 | 0.73 | 1.57E-01 | transcription_start_site | + | 210332 | 210332 | 42    | 28609 | AN7400 |
| 2257 | CONTIG128 | 210087 | 210661 | 0.73 | 1.57E-01 | transcription_start_site | + | 209738 | 209738 | 636   | 28608 | AN7400 |
| 2257 | CONTIG128 | 210087 | 210661 | 0.73 | 1.57E-01 | transcription_start_site | + | 209436 | 209436 | 938   | 28607 | AN7400 |
| 2257 | CONTIG128 | 210087 | 210661 | 0.73 | 1.57E-01 | transcription_start_site | + | 209266 | 209266 | 1108  | 28606 | AN7400 |
| 2257 | CONTIG128 | 210087 | 210661 | 0.73 | 1.57E-01 | transcription_start_site | + | 209087 | 209087 | 1287  | 28605 | AN7400 |
| 1834 | CONTIG128 | 209262 | 209752 | 1.05 | 6.74E-02 | transcription_start_site | + | 212816 | 212816 | -3309 | 28610 | AN7401 |
| 1834 | CONTIG128 | 209262 | 209752 | 1.05 | 6.74E-02 | transcription_start_site | + | 212934 | 212934 | -3427 | 28611 | AN7401 |
| 1834 | CONTIG128 | 209262 | 209752 | 1.05 | 6.74E-02 | transcription_start_site | + | 213171 | 213171 | -3664 | 28612 | AN7401 |
| 1834 | CONTIG128 | 209262 | 209752 | 1.05 | 6.74E-02 | transcription_start_site | + | 213378 | 213378 | -3871 | 28613 | AN7401 |
| 1834 | CONTIG128 | 209262 | 209752 | 1.05 | 6.74E-02 | transcription_start_site | + | 213702 | 213702 | -4195 | 28614 | AN7401 |
| 2257 | CONTIG128 | 210087 | 210661 | 0.73 | 1.57E-01 | transcription_start_site | + | 212816 | 212816 | -2442 | 28610 | AN7401 |
| 2257 | CONTIG128 | 210087 | 210661 | 0.73 | 1.57E-01 | transcription_start_site | + | 212934 | 212934 | -2560 | 28611 | AN7401 |
| 2257 | CONTIG128 | 210087 | 210661 | 0.73 | 1.57E-01 | transcription_start_site | + | 213171 | 213171 | -2797 | 28612 | AN7401 |
| 2257 | CONTIG128 | 210087 | 210661 | 0.73 | 1.57E-01 | transcription_start_site | + | 213378 | 213378 | -3004 | 28613 | AN7401 |
| 2257 | CONTIG128 | 210087 | 210661 | 0.73 | 1.57E-01 | transcription_start_site | + | 213702 | 213702 | -3328 | 28614 | AN7401 |
| 988  | CONTIG128 | 227120 | 227468 | 1.73 | 5.08E-03 | transcription_start_site | - | 226217 | 226217 | -1077 | 28631 | AN7406 |
| 988  | CONTIG128 | 227120 | 227468 | 1.73 | 5.08E-03 | transcription_start_site | - | 226116 | 226116 | -1178 | 28632 | AN7406 |
| 988  | CONTIG128 | 227120 | 227468 | 1.73 | 5.08E-03 | transcription_start_site | - | 225718 | 225718 | -1576 | 28633 | AN7406 |

|      |           |        |        |      |          |                          |   |        |        |       |       |        |
|------|-----------|--------|--------|------|----------|--------------------------|---|--------|--------|-------|-------|--------|
| 988  | CONTIG128 | 227120 | 227468 | 1.73 | 5.08E-03 | transcription_start_site | - | 225324 | 225324 | -1970 | 28634 | AN7406 |
| 988  | CONTIG128 | 227120 | 227468 | 1.73 | 5.08E-03 | transcription_start_site | - | 225088 | 225088 | -2206 | 28635 | AN7406 |
| 988  | CONTIG128 | 227120 | 227468 | 1.73 | 5.08E-03 | transcription_start_site | + | 227393 | 227393 | -99   | 28638 | AN7407 |
| 988  | CONTIG128 | 227120 | 227468 | 1.73 | 5.08E-03 | transcription_start_site | + | 227071 | 227071 | 223   | 28637 | AN7407 |
| 988  | CONTIG128 | 227120 | 227468 | 1.73 | 5.08E-03 | transcription_start_site | + | 226845 | 226845 | 449   | 28636 | AN7407 |
| 988  | CONTIG128 | 227120 | 227468 | 1.73 | 5.08E-03 | transcription_start_site | + | 227777 | 227777 | -483  | 28639 | AN7407 |
| 988  | CONTIG128 | 227120 | 227468 | 1.73 | 5.08E-03 | transcription_start_site | + | 228189 | 228189 | -895  | 28640 | AN7407 |
| 1637 | CONTIG128 | 246984 | 247328 | 1.18 | 4.20E-02 | transcription_start_site | - | 245513 | 245513 | -1643 | 28664 | AN7414 |
| 1637 | CONTIG128 | 246984 | 247328 | 1.18 | 4.20E-02 | transcription_start_site | - | 244168 | 244168 | -2988 | 28665 | AN7414 |
| 1735 | CONTIG129 | 11344  | 11759  | 1.11 | 7.38E-02 | transcription_start_site | - | 8542   | 8542   | -3009 | 28713 | AN7422 |
| 1735 | CONTIG129 | 11344  | 11759  | 1.11 | 7.38E-02 | transcription_start_site | - | 8472   | 8472   | -3079 | 28714 | AN7422 |
| 1735 | CONTIG129 | 11344  | 11759  | 1.11 | 7.38E-02 | transcription_start_site | - | 8152   | 8152   | -3399 | 28715 | AN7422 |
| 1735 | CONTIG129 | 11344  | 11759  | 1.11 | 7.38E-02 | transcription_start_site | - | 7760   | 7760   | -3791 | 28716 | AN7422 |
| 1735 | CONTIG129 | 11344  | 11759  | 1.11 | 7.38E-02 | transcription_start_site | + | 11054  | 11054  | 497   | 28723 | AN7423 |
| 1735 | CONTIG129 | 11344  | 11759  | 1.11 | 7.38E-02 | transcription_start_site | + | 11796  | 11796  | -244  | 28724 | AN7424 |
| 2053 | CONTIG129 | 30469  | 31938  | 0.91 | 1.23E-01 | transcription_start_site | - | 27178  | 27178  | -4025 | 28742 | AN7430 |
| 2053 | CONTIG129 | 30469  | 31938  | 0.91 | 1.23E-01 | transcription_start_site | - | 26969  | 26969  | -4234 | 28743 | AN7430 |
| 2053 | CONTIG129 | 30469  | 31938  | 0.91 | 1.23E-01 | transcription_start_site | + | 31084  | 31084  | 119   | 28750 | AN7432 |
| 2053 | CONTIG129 | 30469  | 31938  | 0.91 | 1.23E-01 | transcription_start_site | + | 30988  | 30988  | 215   | 28749 | AN7432 |
| 2053 | CONTIG129 | 30469  | 31938  | 0.91 | 1.23E-01 | transcription_start_site | + | 31576  | 31576  | -372  | 28751 | AN7432 |
| 1740 | CONTIG129 | 53044  | 53381  | 1.11 | 1.22E-01 | transcription_start_site | - | 52906  | 52906  | -306  | 28772 | AN7439 |
| 1740 | CONTIG129 | 53044  | 53381  | 1.11 | 1.22E-01 | transcription_start_site | - | 50601  | 50601  | -2611 | 28773 | AN7439 |
| 1740 | CONTIG129 | 53044  | 53381  | 1.11 | 1.22E-01 | transcription_start_site | + | 53397  | 53397  | -184  | 28774 | AN7440 |
| 1740 | CONTIG129 | 53044  | 53381  | 1.11 | 1.22E-01 | transcription_start_site | + | 54543  | 54543  | -1330 | 28775 | AN7440 |
| 1740 | CONTIG129 | 53044  | 53381  | 1.11 | 1.22E-01 | transcription_start_site | + | 57283  | 57283  | -4070 | 28779 | AN7442 |
| 1740 | CONTIG129 | 53044  | 53381  | 1.11 | 1.22E-01 | transcription_start_site | + | 57662  | 57662  | -4449 | 28780 | AN7442 |
| 655  | CONTIG129 | 91053  | 91402  | 2.1  | 6.24E-03 | transcription_start_site | - | 89332  | 89332  | -1895 | 28797 | AN7451 |
| 655  | CONTIG129 | 91053  | 91402  | 2.1  | 6.24E-03 | transcription_start_site | - | 88949  | 88949  | -2278 | 28798 | AN7451 |
| 655  | CONTIG129 | 91053  | 91402  | 2.1  | 6.24E-03 | transcription_start_site | - | 86058  | 86058  | -5169 | 28799 | AN7451 |
| 1623 | CONTIG129 | 89493  | 90139  | 1.19 | 9.60E-02 | transcription_start_site | - | 89332  | 89332  | -484  | 28797 | AN7451 |
| 1623 | CONTIG129 | 89493  | 90139  | 1.19 | 9.60E-02 | transcription_start_site | - | 88949  | 88949  | -867  | 28798 | AN7451 |
| 1623 | CONTIG129 | 89493  | 90139  | 1.19 | 9.60E-02 | transcription_start_site | - | 86058  | 86058  | -3758 | 28799 | AN7451 |
| 1623 | CONTIG129 | 89493  | 90139  | 1.19 | 9.60E-02 | transcription_start_site | - | 85900  | 85900  | -3916 | 28800 | AN7451 |
| 655  | CONTIG129 | 91053  | 91402  | 2.1  | 6.24E-03 | transcription_start_site | + | 91664  | 91664  | -436  | 28801 | AN7452 |
| 655  | CONTIG129 | 91053  | 91402  | 2.1  | 6.24E-03 | transcription_start_site | + | 91828  | 91828  | -600  | 28802 | AN7452 |
| 655  | CONTIG129 | 91053  | 91402  | 2.1  | 6.24E-03 | transcription_start_site | + | 91907  | 91907  | -679  | 28803 | AN7452 |
| 655  | CONTIG129 | 91053  | 91402  | 2.1  | 6.24E-03 | transcription_start_site | + | 92178  | 92178  | -950  | 28804 | AN7452 |
| 655  | CONTIG129 | 91053  | 91402  | 2.1  | 6.24E-03 | transcription_start_site | + | 92368  | 92368  | -1140 | 28805 | AN7452 |
| 655  | CONTIG129 | 91053  | 91402  | 2.1  | 6.24E-03 | transcription_start_site | + | 92516  | 92516  | -1288 | 28806 | AN7452 |
| 655  | CONTIG129 | 91053  | 91402  | 2.1  | 6.24E-03 | transcription_start_site | + | 92877  | 92877  | -1649 | 28807 | AN7452 |
| 655  | CONTIG129 | 91053  | 91402  | 2.1  | 6.24E-03 | transcription_start_site | + | 92994  | 92994  | -1766 | 28808 | AN7452 |
| 1623 | CONTIG129 | 89493  | 90139  | 1.19 | 9.60E-02 | transcription_start_site | + | 91664  | 91664  | -1848 | 28801 | AN7452 |
| 1623 | CONTIG129 | 89493  | 90139  | 1.19 | 9.60E-02 | transcription_start_site | + | 91828  | 91828  | -2012 | 28802 | AN7452 |
| 1623 | CONTIG129 | 89493  | 90139  | 1.19 | 9.60E-02 | transcription_start_site | + | 91907  | 91907  | -2091 | 28803 | AN7452 |
| 1623 | CONTIG129 | 89493  | 90139  | 1.19 | 9.60E-02 | transcription_start_site | + | 92178  | 92178  | -2362 | 28804 | AN7452 |
| 1623 | CONTIG129 | 89493  | 90139  | 1.19 | 9.60E-02 | transcription_start_site | + | 92368  | 92368  | -2552 | 28805 | AN7452 |
| 1623 | CONTIG129 | 89493  | 90139  | 1.19 | 9.60E-02 | transcription_start_site | + | 92516  | 92516  | -2700 | 28806 | AN7452 |
| 1623 | CONTIG129 | 89493  | 90139  | 1.19 | 9.60E-02 | transcription_start_site | + | 92877  | 92877  | -3061 | 28807 | AN7452 |
| 1623 | CONTIG129 | 89493  | 90139  | 1.19 | 9.60E-02 | transcription_start_site | + | 92994  | 92994  | -3178 | 28808 | AN7452 |
| 763  | CONTIG129 | 98483  | 98757  | 1.98 | 9.32E-03 | transcription_start_site | - | 97868  | 97868  | -752  | 28809 | AN7453 |
| 763  | CONTIG129 | 98483  | 98757  | 1.98 | 9.32E-03 | transcription_start_site | - | 97718  | 97718  | -902  | 28810 | AN7453 |
| 763  | CONTIG129 | 98483  | 98757  | 1.98 | 9.32E-03 | transcription_start_site | - | 96486  | 96486  | -2134 | 28811 | AN7453 |
| 424  | CONTIG129 | 95028  | 95377  | 2.42 | 1.62E-03 | transcription_start_site | + | 98718  | 98718  | -3515 | 28812 | AN7454 |
| 424  | CONTIG129 | 95028  | 95377  | 2.42 | 1.62E-03 | transcription_start_site | + | 100252 | 100252 | -5049 | 28813 | AN7454 |
| 763  | CONTIG129 | 98483  | 98757  | 1.98 | 9.32E-03 | transcription_start_site | + | 98718  | 98718  | -98   | 28812 | AN7454 |
| 763  | CONTIG129 | 98483  | 98757  | 1.98 | 9.32E-03 | transcription_start_site | + | 100252 | 100252 | -1632 | 28813 | AN7454 |
| 205  | CONTIG129 | 123688 | 124327 | 2.81 | 0.00E+00 | transcription_start_site | - | 122814 | 122814 | -1193 | 28840 | AN7463 |

|      |           |        |        |      |          |                          |   |        |        |       |       |        |
|------|-----------|--------|--------|------|----------|--------------------------|---|--------|--------|-------|-------|--------|
| 205  | CONTIG129 | 123688 | 124327 | 2.81 | 0.00E+00 | transcription_start_site | - | 122592 | 122592 | -1415 | 28841 | AN7463 |
| 205  | CONTIG129 | 123688 | 124327 | 2.81 | 0.00E+00 | transcription_start_site | - | 122207 | 122207 | -1800 | 28842 | AN7463 |
| 205  | CONTIG129 | 123688 | 124327 | 2.81 | 0.00E+00 | transcription_start_site | - | 121561 | 121561 | -2446 | 28843 | AN7463 |
| 1061 | CONTIG129 | 137643 | 138508 | 1.66 | 1.06E-02 | transcription_start_site | - | 137558 | 137558 | -517  | 28855 | AN7467 |
| 1061 | CONTIG129 | 137643 | 138508 | 1.66 | 1.06E-02 | transcription_start_site | - | 137336 | 137336 | -739  | 28856 | AN7467 |
| 1061 | CONTIG129 | 137643 | 138508 | 1.66 | 1.06E-02 | transcription_start_site | - | 137267 | 137267 | -808  | 28857 | AN7467 |
| 1061 | CONTIG129 | 137643 | 138508 | 1.66 | 1.06E-02 | transcription_start_site | - | 136910 | 136910 | -1165 | 28858 | AN7467 |
| 1061 | CONTIG129 | 137643 | 138508 | 1.66 | 1.06E-02 | transcription_start_site | + | 138618 | 138618 | -542  | 28859 | AN7468 |
| 1061 | CONTIG129 | 137643 | 138508 | 1.66 | 1.06E-02 | transcription_start_site | + | 138929 | 138929 | -853  | 28860 | AN7468 |
| 1061 | CONTIG129 | 137643 | 138508 | 1.66 | 1.06E-02 | transcription_start_site | + | 141671 | 141671 | -3595 | 28861 | AN7469 |
| 1061 | CONTIG129 | 137643 | 138508 | 1.66 | 1.06E-02 | transcription_start_site | + | 141852 | 141852 | -3776 | 28862 | AN7469 |
| 1061 | CONTIG129 | 137643 | 138508 | 1.66 | 1.06E-02 | transcription_start_site | + | 142157 | 142157 | -4081 | 28863 | AN7469 |
| 1061 | CONTIG129 | 137643 | 138508 | 1.66 | 1.06E-02 | transcription_start_site | + | 142757 | 142757 | -4681 | 28864 | AN7470 |
| 1061 | CONTIG129 | 137643 | 138508 | 1.66 | 1.06E-02 | transcription_start_site | + | 143087 | 143087 | -5011 | 28865 | AN7470 |
| 1506 | CONTIG129 | 144761 | 145040 | 1.27 | 7.66E-02 | transcription_start_site | - | 145499 | 145499 | 598   | 28873 | AN7471 |
| 1506 | CONTIG129 | 144761 | 145040 | 1.27 | 7.66E-02 | transcription_start_site | - | 144154 | 144154 | -746  | 28874 | AN7471 |
| 1506 | CONTIG129 | 144761 | 145040 | 1.27 | 7.66E-02 | transcription_start_site | - | 145857 | 145857 | 956   | 28872 | AN7471 |
| 1506 | CONTIG129 | 144761 | 145040 | 1.27 | 7.66E-02 | transcription_start_site | + | 147155 | 147155 | -2254 | 28875 | AN7472 |
| 1506 | CONTIG129 | 144761 | 145040 | 1.27 | 7.66E-02 | transcription_start_site | + | 147572 | 147572 | -2671 | 28876 | AN7472 |
| 1506 | CONTIG129 | 144761 | 145040 | 1.27 | 7.66E-02 | transcription_start_site | + | 148664 | 148664 | -3763 | 28877 | AN7472 |
| 1558 | CONTIG129 | 158116 | 158375 | 1.23 | 8.63E-02 | transcription_start_site | - | 156796 | 156796 | -1449 | 28884 | AN7474 |
| 1558 | CONTIG129 | 158116 | 158375 | 1.23 | 8.63E-02 | transcription_start_site | - | 156489 | 156489 | -1756 | 28885 | AN7474 |
| 1741 | CONTIG129 | 157501 | 157935 | 1.11 | 1.22E-01 | transcription_start_site | - | 156796 | 156796 | -922  | 28884 | AN7474 |
| 1741 | CONTIG129 | 157501 | 157935 | 1.11 | 1.22E-01 | transcription_start_site | - | 156489 | 156489 | -1229 | 28885 | AN7474 |
| 1558 | CONTIG129 | 158116 | 158375 | 1.23 | 8.63E-02 | transcription_start_site | + | 159297 | 159297 | -1051 | 28886 | AN7475 |
| 1558 | CONTIG129 | 158116 | 158375 | 1.23 | 8.63E-02 | transcription_start_site | + | 161111 | 161111 | -2865 | 28887 | AN7475 |
| 1558 | CONTIG129 | 158116 | 158375 | 1.23 | 8.63E-02 | transcription_start_site | + | 161650 | 161650 | -3404 | 28888 | AN7475 |
| 1741 | CONTIG129 | 157501 | 157935 | 1.11 | 1.22E-01 | transcription_start_site | + | 159297 | 159297 | -1579 | 28886 | AN7475 |
| 1741 | CONTIG129 | 157501 | 157935 | 1.11 | 1.22E-01 | transcription_start_site | + | 161111 | 161111 | -3393 | 28887 | AN7475 |
| 1741 | CONTIG129 | 157501 | 157935 | 1.11 | 1.22E-01 | transcription_start_site | + | 161650 | 161650 | -3932 | 28888 | AN7475 |
| 2054 | CONTIG129 | 162171 | 162752 | 0.91 | 1.23E-01 | transcription_start_site | + | 161650 | 161650 | 811   | 28888 | AN7475 |
| 2054 | CONTIG129 | 162171 | 162752 | 0.91 | 1.23E-01 | transcription_start_site | + | 164137 | 164137 | -1675 | 28889 | AN7476 |
| 2054 | CONTIG129 | 162171 | 162752 | 0.91 | 1.23E-01 | transcription_start_site | + | 164499 | 164499 | -2037 | 28890 | AN7476 |
| 2054 | CONTIG129 | 162171 | 162752 | 0.91 | 1.23E-01 | transcription_start_site | + | 164648 | 164648 | -2186 | 28891 | AN7476 |
| 656  | CONTIG129 | 168166 | 168590 | 2.1  | 6.24E-03 | transcription_start_site | - | 167333 | 167333 | -1045 | 28892 | AN7477 |
| 656  | CONTIG129 | 168166 | 168590 | 2.1  | 6.24E-03 | transcription_start_site | - | 167075 | 167075 | -1303 | 28893 | AN7477 |
| 656  | CONTIG129 | 168166 | 168590 | 2.1  | 6.24E-03 | transcription_start_site | + | 170343 | 170343 | -1965 | 28894 | AN7478 |
| 656  | CONTIG129 | 168166 | 168590 | 2.1  | 6.24E-03 | transcription_start_site | + | 171025 | 171025 | -2647 | 28895 | AN7478 |
| 1133 | CONTIG129 | 174826 | 175325 | 1.58 | 1.44E-02 | transcription_start_site | - | 173975 | 173975 | -1100 | 28896 | AN7479 |
| 1133 | CONTIG129 | 174826 | 175325 | 1.58 | 1.44E-02 | transcription_start_site | - | 172264 | 172264 | -2811 | 28897 | AN7479 |
| 1133 | CONTIG129 | 174826 | 175325 | 1.58 | 1.44E-02 | transcription_start_site | + | 176307 | 176307 | -1231 | 28898 | AN7480 |
| 1133 | CONTIG129 | 174826 | 175325 | 1.58 | 1.44E-02 | transcription_start_site | + | 179644 | 179644 | -4568 | 28899 | AN7481 |
| 1133 | CONTIG129 | 174826 | 175325 | 1.58 | 1.44E-02 | transcription_start_site | + | 179820 | 179820 | -4744 | 28900 | AN7481 |
| 95   | CONTIG129 | 189016 | 189430 | 3.09 | 0.00E+00 | transcription_start_site | - | 184016 | 184016 | -5207 | 28901 | AN7482 |
| 390  | CONTIG129 | 184736 | 185170 | 2.46 | 1.45E-03 | transcription_start_site | - | 184016 | 184016 | -937  | 28901 | AN7482 |
| 691  | CONTIG129 | 186616 | 187630 | 2.06 | 7.08E-03 | transcription_start_site | - | 184016 | 184016 | -3107 | 28901 | AN7482 |
| 801  | CONTIG129 | 198902 | 199716 | 1.94 | 3.78E-03 | transcription_start_site | - | 196265 | 196265 | -3044 | 28902 | AN7483 |
| 801  | CONTIG129 | 198902 | 199716 | 1.94 | 3.78E-03 | transcription_start_site | + | 200559 | 200559 | -1250 | 28905 | AN7485 |
| 801  | CONTIG129 | 198902 | 199716 | 1.94 | 3.78E-03 | transcription_start_site | + | 200851 | 200851 | -1542 | 28906 | AN7485 |
| 801  | CONTIG129 | 198902 | 199716 | 1.94 | 3.78E-03 | transcription_start_site | + | 201033 | 201033 | -1724 | 28907 | AN7485 |
| 801  | CONTIG129 | 198902 | 199716 | 1.94 | 3.78E-03 | transcription_start_site | + | 201827 | 201827 | -2518 | 28908 | AN7485 |
| 801  | CONTIG129 | 198902 | 199716 | 1.94 | 3.78E-03 | transcription_start_site | + | 202539 | 202539 | -3230 | 28909 | AN7485 |
| 801  | CONTIG129 | 198902 | 199716 | 1.94 | 3.78E-03 | transcription_start_site | + | 204520 | 204520 | -5211 | 28912 | AN7487 |
| 801  | CONTIG129 | 198902 | 199716 | 1.94 | 3.78E-03 | transcription_start_site | + | 204688 | 204688 | -5379 | 28913 | AN7487 |
| 1931 | CONTIG129 | 240239 | 240525 | 0.99 | 1.76E-01 | transcription_start_site | + | 240571 | 240571 | -189  | 28948 | AN7500 |
| 1931 | CONTIG129 | 240239 | 240525 | 0.99 | 1.76E-01 | transcription_start_site | + | 241453 | 241453 | -1071 | 28949 | AN7500 |
| 1931 | CONTIG129 | 240239 | 240525 | 0.99 | 1.76E-01 | transcription_start_site | + | 241852 | 241852 | -1470 | 28950 | AN7500 |

|      |           |        |        |      |          |                          |   |        |        |       |       |        |
|------|-----------|--------|--------|------|----------|--------------------------|---|--------|--------|-------|-------|--------|
| 1931 | CONTIG129 | 240239 | 240525 | 0.99 | 1.76E-01 | transcription_start_site | + | 242058 | 242058 | -1676 | 28951 | AN7500 |
| 1931 | CONTIG129 | 240239 | 240525 | 0.99 | 1.76E-01 | transcription_start_site | + | 243007 | 243007 | -2625 | 28952 | AN7500 |
| 724  | CONTIG129 | 269343 | 269612 | 2.02 | 7.70E-03 | transcription_start_site | - | 264792 | 264792 | -4685 | 28974 | AN7506 |
| 982  | CONTIG129 | 265971 | 266232 | 1.74 | 1.80E-02 | transcription_start_site | - | 264792 | 264792 | -1309 | 28974 | AN7506 |
| 1983 | CONTIG129 | 264846 | 265775 | 0.95 | 1.05E-01 | transcription_start_site | - | 264792 | 264792 | -518  | 28974 | AN7506 |
| 724  | CONTIG129 | 269343 | 269612 | 2.02 | 7.70E-03 | transcription_start_site | - | 269104 | 269104 | -373  | 28976 | AN7507 |
| 724  | CONTIG129 | 269343 | 269612 | 2.02 | 7.70E-03 | transcription_start_site | - | 268663 | 268663 | -814  | 28977 | AN7507 |
| 724  | CONTIG129 | 269343 | 269612 | 2.02 | 7.70E-03 | transcription_start_site | - | 268461 | 268461 | -1016 | 28978 | AN7507 |
| 724  | CONTIG129 | 269343 | 269612 | 2.02 | 7.70E-03 | transcription_start_site | - | 267682 | 267682 | -1795 | 28979 | AN7507 |
| 602  | CONTIG129 | 278180 | 279289 | 2.18 | 1.41E-03 | transcription_start_site | - | 275975 | 275975 | -2759 | 28980 | AN7508 |
| 1311 | CONTIG129 | 277432 | 278004 | 1.43 | 4.78E-02 | transcription_start_site | - | 275975 | 275975 | -1743 | 28980 | AN7508 |
| 602  | CONTIG129 | 278180 | 279289 | 2.18 | 1.41E-03 | transcription_start_site | + | 278699 | 278699 | 35    | 28982 | AN7509 |
| 602  | CONTIG129 | 278180 | 279289 | 2.18 | 1.41E-03 | transcription_start_site | + | 278001 | 278001 | 733   | 28981 | AN7509 |
| 1311 | CONTIG129 | 277432 | 278004 | 1.43 | 4.78E-02 | transcription_start_site | + | 278001 | 278001 | -283  | 28981 | AN7509 |
| 1311 | CONTIG129 | 277432 | 278004 | 1.43 | 4.78E-02 | transcription_start_site | + | 278699 | 278699 | -981  | 28982 | AN7509 |
| 156  | CONTIG129 | 283070 | 283565 | 2.93 | 0.00E+00 | transcription_start_site | - | 282238 | 282238 | -1079 | 28983 | AN7510 |
| 156  | CONTIG129 | 283070 | 283565 | 2.93 | 0.00E+00 | transcription_start_site | - | 282170 | 282170 | -1147 | 28984 | AN7510 |
| 156  | CONTIG129 | 283070 | 283565 | 2.93 | 0.00E+00 | transcription_start_site | - | 281193 | 281193 | -2124 | 28985 | AN7510 |
| 156  | CONTIG129 | 283070 | 283565 | 2.93 | 0.00E+00 | transcription_start_site | - | 281114 | 281114 | -2203 | 28986 | AN7510 |
| 156  | CONTIG129 | 283070 | 283565 | 2.93 | 0.00E+00 | transcription_start_site | - | 280762 | 280762 | -2555 | 28987 | AN7510 |
| 156  | CONTIG129 | 283070 | 283565 | 2.93 | 0.00E+00 | transcription_start_site | - | 280454 | 280454 | -2863 | 28988 | AN7510 |
| 156  | CONTIG129 | 283070 | 283565 | 2.93 | 0.00E+00 | transcription_start_site | - | 280286 | 280286 | -3031 | 28989 | AN7510 |
| 602  | CONTIG129 | 278180 | 279289 | 2.18 | 1.41E-03 | transcription_start_site | - | 280286 | 280286 | 1551  | 28989 | AN7510 |
| 156  | CONTIG129 | 283070 | 283565 | 2.93 | 0.00E+00 | transcription_start_site | + | 284077 | 284077 | -759  | 28990 | AN7511 |
| 156  | CONTIG129 | 283070 | 283565 | 2.93 | 0.00E+00 | transcription_start_site | + | 284223 | 284223 | -905  | 28991 | AN7511 |
| 602  | CONTIG129 | 278180 | 279289 | 2.18 | 1.41E-03 | transcription_start_site | + | 284077 | 284077 | -5342 | 28990 | AN7511 |
| 602  | CONTIG129 | 278180 | 279289 | 2.18 | 1.41E-03 | transcription_start_site | + | 284223 | 284223 | -5488 | 28991 | AN7511 |
| 1312 | CONTIG129 | 292205 | 292564 | 1.43 | 4.78E-02 | transcription_start_site | + | 293516 | 293516 | -1131 | 28992 | AN7513 |
| 1312 | CONTIG129 | 292205 | 292564 | 1.43 | 4.78E-02 | transcription_start_site | + | 294042 | 294042 | -1657 | 28993 | AN7513 |
| 1312 | CONTIG129 | 292205 | 292564 | 1.43 | 4.78E-02 | transcription_start_site | + | 295208 | 295208 | -2823 | 28994 | AN7513 |
| 1736 | CONTIG129 | 317853 | 318277 | 1.11 | 7.38E-02 | transcription_start_site | - | 313031 | 313031 | -5034 | 28999 | AN7517 |
| 1736 | CONTIG129 | 317853 | 318277 | 1.11 | 7.38E-02 | transcription_start_site | - | 315885 | 315885 | -2180 | 29004 | AN7518 |
| 1736 | CONTIG129 | 317853 | 318277 | 1.11 | 7.38E-02 | transcription_start_site | - | 315453 | 315453 | -2612 | 29005 | AN7518 |
| 1736 | CONTIG129 | 317853 | 318277 | 1.11 | 7.38E-02 | transcription_start_site | - | 315040 | 315040 | -3025 | 29006 | AN7518 |
| 1736 | CONTIG129 | 317853 | 318277 | 1.11 | 7.38E-02 | transcription_start_site | - | 314853 | 314853 | -3212 | 29007 | AN7518 |
| 1736 | CONTIG129 | 317853 | 318277 | 1.11 | 7.38E-02 | transcription_start_site | - | 314600 | 314600 | -3465 | 29008 | AN7518 |
| 1736 | CONTIG129 | 317853 | 318277 | 1.11 | 7.38E-02 | transcription_start_site | - | 314342 | 314342 | -3723 | 29009 | AN7518 |
| 1736 | CONTIG129 | 317853 | 318277 | 1.11 | 7.38E-02 | transcription_start_site | + | 317852 | 317852 | 213   | 29014 | AN7519 |
| 1736 | CONTIG129 | 317853 | 318277 | 1.11 | 7.38E-02 | transcription_start_site | + | 317307 | 317307 | 758   | 29013 | AN7519 |
| 1736 | CONTIG129 | 317853 | 318277 | 1.11 | 7.38E-02 | transcription_start_site | + | 317020 | 317020 | 1045  | 29012 | AN7519 |
| 1736 | CONTIG129 | 317853 | 318277 | 1.11 | 7.38E-02 | transcription_start_site | + | 320995 | 320995 | -2930 | 29017 | AN7521 |
| 1742 | CONTIG129 | 335569 | 335993 | 1.11 | 1.22E-01 | transcription_start_site | + | 336077 | 336077 | -296  | 29026 | AN7524 |
| 1742 | CONTIG129 | 335569 | 335993 | 1.11 | 1.22E-01 | transcription_start_site | + | 336198 | 336198 | -417  | 29027 | AN7524 |
| 1742 | CONTIG129 | 335569 | 335993 | 1.11 | 1.22E-01 | transcription_start_site | + | 336984 | 336984 | -1203 | 29028 | AN7524 |
| 1742 | CONTIG129 | 335569 | 335993 | 1.11 | 1.22E-01 | transcription_start_site | + | 340612 | 340612 | -4831 | 29033 | AN7526 |
| 1742 | CONTIG129 | 335569 | 335993 | 1.11 | 1.22E-01 | transcription_start_site | + | 340736 | 340736 | -4955 | 29034 | AN7526 |
| 1742 | CONTIG129 | 335569 | 335993 | 1.11 | 1.22E-01 | transcription_start_site | + | 340888 | 340888 | -5107 | 29035 | AN7526 |
| 373  | CONTIG129 | 370742 | 371011 | 2.49 | 1.09E-03 | transcription_start_site | - | 370215 | 370215 | -661  | 29046 | AN7533 |
| 373  | CONTIG129 | 370742 | 371011 | 2.49 | 1.09E-03 | transcription_start_site | - | 369084 | 369084 | -1792 | 29047 | AN7533 |
| 373  | CONTIG129 | 370742 | 371011 | 2.49 | 1.09E-03 | transcription_start_site | - | 368011 | 368011 | -2865 | 29048 | AN7533 |
| 373  | CONTIG129 | 370742 | 371011 | 2.49 | 1.09E-03 | transcription_start_site | + | 371433 | 371433 | -556  | 29049 | AN7534 |
| 373  | CONTIG129 | 370742 | 371011 | 2.49 | 1.09E-03 | transcription_start_site | + | 375807 | 375807 | -4930 | 29052 | AN7536 |
| 373  | CONTIG129 | 370742 | 371011 | 2.49 | 1.09E-03 | transcription_start_site | + | 375921 | 375921 | -5044 | 29053 | AN7536 |
| 1805 | CONTIG129 | 393168 | 393594 | 1.07 | 1.38E-01 | transcription_start_site | + | 392208 | 392208 | 1173  | 29071 | AN7541 |
| 983  | CONTIG129 | 398032 | 398451 | 1.74 | 1.80E-02 | transcription_start_site | - | 396278 | 396278 | -1963 | 29072 | AN7542 |
| 983  | CONTIG129 | 398032 | 398451 | 1.74 | 1.80E-02 | transcription_start_site | - | 395987 | 395987 | -2254 | 29073 | AN7542 |
| 983  | CONTIG129 | 398032 | 398451 | 1.74 | 1.80E-02 | transcription_start_site | - | 395845 | 395845 | -2396 | 29074 | AN7542 |

|      |           |        |        |      |          |                          |   |        |        |       |       |        |
|------|-----------|--------|--------|------|----------|--------------------------|---|--------|--------|-------|-------|--------|
| 983  | CONTIG129 | 398032 | 398451 | 1.74 | 1.80E-02 | transcription_start_site | - | 395711 | 395711 | -2530 | 29075 | AN7542 |
| 983  | CONTIG129 | 398032 | 398451 | 1.74 | 1.80E-02 | transcription_start_site | - | 395135 | 395135 | -3106 | 29076 | AN7542 |
| 983  | CONTIG129 | 398032 | 398451 | 1.74 | 1.80E-02 | transcription_start_site | + | 398979 | 398979 | -737  | 29077 | AN7543 |
| 61   | CONTIG129 | 409278 | 409570 | 3.21 | 0.00E+00 | transcription_start_site | - | 406834 | 406834 | -2590 | 29081 | AN7545 |
| 907  | CONTIG129 | 410703 | 411127 | 1.82 | 1.37E-02 | transcription_start_site | - | 406834 | 406834 | -4081 | 29081 | AN7545 |
| 61   | CONTIG129 | 409278 | 409570 | 3.21 | 0.00E+00 | transcription_start_site | - | 409913 | 409913 | 489   | 29084 | AN7546 |
| 61   | CONTIG129 | 409278 | 409570 | 3.21 | 0.00E+00 | transcription_start_site | - | 410032 | 410032 | 608   | 29083 | AN7546 |
| 61   | CONTIG129 | 409278 | 409570 | 3.21 | 0.00E+00 | transcription_start_site | - | 410470 | 410470 | 1046  | 29082 | AN7546 |
| 907  | CONTIG129 | 410703 | 411127 | 1.82 | 1.37E-02 | transcription_start_site | - | 410470 | 410470 | -445  | 29082 | AN7546 |
| 907  | CONTIG129 | 410703 | 411127 | 1.82 | 1.37E-02 | transcription_start_site | - | 410032 | 410032 | -883  | 29083 | AN7546 |
| 907  | CONTIG129 | 410703 | 411127 | 1.82 | 1.37E-02 | transcription_start_site | - | 409913 | 409913 | -1002 | 29084 | AN7546 |
| 907  | CONTIG129 | 410703 | 411127 | 1.82 | 1.37E-02 | transcription_start_site | + | 416119 | 416119 | -5204 | 29085 | AN7547 |
| 72   | CONTIG129 | 439896 | 440225 | 3.17 | 0.00E+00 | transcription_start_site | - | 437172 | 437172 | -2888 | 29097 | AN7553 |
| 72   | CONTIG129 | 439896 | 440225 | 3.17 | 0.00E+00 | transcription_start_site | - | 436707 | 436707 | -3353 | 29098 | AN7553 |
| 72   | CONTIG129 | 439896 | 440225 | 3.17 | 0.00E+00 | transcription_start_site | - | 436409 | 436409 | -3651 | 29099 | AN7553 |
| 1743 | CONTIG129 | 452416 | 452695 | 1.11 | 1.22E-01 | transcription_start_site | - | 448823 | 448823 | -3732 | 29100 | AN7554 |
| 1743 | CONTIG129 | 452416 | 452695 | 1.11 | 1.22E-01 | transcription_start_site | - | 448612 | 448612 | -3943 | 29101 | AN7554 |
| 1743 | CONTIG129 | 452416 | 452695 | 1.11 | 1.22E-01 | transcription_start_site | - | 451523 | 451523 | -1032 | 29104 | AN7556 |
| 1743 | CONTIG129 | 452416 | 452695 | 1.11 | 1.22E-01 | transcription_start_site | - | 450949 | 450949 | -1606 | 29105 | AN7556 |
| 1743 | CONTIG129 | 452416 | 452695 | 1.11 | 1.22E-01 | transcription_start_site | - | 452054 | 452054 | -501  | 29109 | AN7557 |
| 1743 | CONTIG129 | 452416 | 452695 | 1.11 | 1.22E-01 | transcription_start_site | + | 457293 | 457293 | -4737 | 29110 | AN7558 |
| 908  | CONTIG129 | 470421 | 470708 | 1.82 | 1.37E-02 | transcription_start_site | - | 469538 | 469538 | -1026 | 29119 | AN7563 |
| 908  | CONTIG129 | 470421 | 470708 | 1.82 | 1.37E-02 | transcription_start_site | - | 468599 | 468599 | -1965 | 29120 | AN7563 |
| 908  | CONTIG129 | 470421 | 470708 | 1.82 | 1.37E-02 | transcription_start_site | - | 468152 | 468152 | -2412 | 29121 | AN7563 |
| 1871 | CONTIG129 | 471836 | 472330 | 1.03 | 1.54E-01 | transcription_start_site | - | 469538 | 469538 | -2545 | 29119 | AN7563 |
| 1871 | CONTIG129 | 471836 | 472330 | 1.03 | 1.54E-01 | transcription_start_site | - | 468599 | 468599 | -3484 | 29120 | AN7563 |
| 1871 | CONTIG129 | 471836 | 472330 | 1.03 | 1.54E-01 | transcription_start_site | - | 468152 | 468152 | -3931 | 29121 | AN7563 |
| 908  | CONTIG129 | 470421 | 470708 | 1.82 | 1.37E-02 | transcription_start_site | - | 470824 | 470824 | 259   | 29124 | AN7564 |
| 1134 | CONTIG129 | 476796 | 477373 | 1.58 | 1.44E-02 | transcription_start_site | - | 472064 | 472064 | -5020 | 29122 | AN7564 |
| 1134 | CONTIG129 | 476796 | 477373 | 1.58 | 1.44E-02 | transcription_start_site | - | 471830 | 471830 | -5254 | 29123 | AN7564 |
| 1871 | CONTIG129 | 471836 | 472330 | 1.03 | 1.54E-01 | transcription_start_site | - | 472064 | 472064 | -19   | 29122 | AN7564 |
| 1871 | CONTIG129 | 471836 | 472330 | 1.03 | 1.54E-01 | transcription_start_site | - | 471830 | 471830 | -253  | 29123 | AN7564 |
| 1871 | CONTIG129 | 471836 | 472330 | 1.03 | 1.54E-01 | transcription_start_site | - | 470824 | 470824 | -1259 | 29124 | AN7564 |
| 908  | CONTIG129 | 470421 | 470708 | 1.82 | 1.37E-02 | transcription_start_site | + | 472619 | 472619 | -2054 | 29125 | AN7565 |
| 908  | CONTIG129 | 470421 | 470708 | 1.82 | 1.37E-02 | transcription_start_site | + | 472975 | 472975 | -2410 | 29126 | AN7565 |
| 1871 | CONTIG129 | 471836 | 472330 | 1.03 | 1.54E-01 | transcription_start_site | + | 472619 | 472619 | -536  | 29125 | AN7565 |
| 1871 | CONTIG129 | 471836 | 472330 | 1.03 | 1.54E-01 | transcription_start_site | + | 472975 | 472975 | -892  | 29126 | AN7565 |
| 1134 | CONTIG129 | 476796 | 477373 | 1.58 | 1.44E-02 | transcription_start_site | - | 476769 | 476769 | -315  | 29127 | AN7566 |
| 1134 | CONTIG129 | 476796 | 477373 | 1.58 | 1.44E-02 | transcription_start_site | + | 477505 | 477505 | -420  | 29128 | AN7567 |
| 1134 | CONTIG129 | 476796 | 477373 | 1.58 | 1.44E-02 | transcription_start_site | + | 478344 | 478344 | -1259 | 29129 | AN7567 |
| 457  | CONTIG129 | 485176 | 485532 | 2.38 | 1.77E-03 | transcription_start_site | - | 480627 | 480627 | -4727 | 29130 | AN7568 |
| 1134 | CONTIG129 | 476796 | 477373 | 1.58 | 1.44E-02 | transcription_start_site | + | 480973 | 480973 | -3888 | 29132 | AN7569 |
| 1134 | CONTIG129 | 476796 | 477373 | 1.58 | 1.44E-02 | transcription_start_site | + | 481066 | 481066 | -3981 | 29133 | AN7569 |
| 1134 | CONTIG129 | 476796 | 477373 | 1.58 | 1.44E-02 | transcription_start_site | + | 481188 | 481188 | -4103 | 29134 | AN7569 |
| 457  | CONTIG129 | 485176 | 485532 | 2.38 | 1.77E-03 | transcription_start_site | - | 484250 | 484250 | -1104 | 29135 | AN7570 |
| 457  | CONTIG129 | 485176 | 485532 | 2.38 | 1.77E-03 | transcription_start_site | - | 484060 | 484060 | -1294 | 29136 | AN7570 |
| 457  | CONTIG129 | 485176 | 485532 | 2.38 | 1.77E-03 | transcription_start_site | - | 483931 | 483931 | -1423 | 29137 | AN7570 |
| 457  | CONTIG129 | 485176 | 485532 | 2.38 | 1.77E-03 | transcription_start_site | - | 483725 | 483725 | -1629 | 29138 | AN7570 |
| 457  | CONTIG129 | 485176 | 485532 | 2.38 | 1.77E-03 | transcription_start_site | - | 483576 | 483576 | -1778 | 29139 | AN7570 |
| 457  | CONTIG129 | 485176 | 485532 | 2.38 | 1.77E-03 | transcription_start_site | - | 483441 | 483441 | -1913 | 29140 | AN7570 |
| 457  | CONTIG129 | 485176 | 485532 | 2.38 | 1.77E-03 | transcription_start_site | - | 482862 | 482862 | -2492 | 29141 | AN7570 |
| 457  | CONTIG129 | 485176 | 485532 | 2.38 | 1.77E-03 | transcription_start_site | + | 486084 | 486084 | -730  | 29142 | AN7571 |
| 457  | CONTIG129 | 485176 | 485532 | 2.38 | 1.77E-03 | transcription_start_site | + | 486794 | 486794 | -1440 | 29143 | AN7571 |
| 188  | CONTIG129 | 498008 | 498587 | 2.85 | 0.00E+00 | transcription_start_site | - | 496640 | 496640 | -1657 | 29144 | AN7572 |
| 188  | CONTIG129 | 498008 | 498587 | 2.85 | 0.00E+00 | transcription_start_site | - | 496023 | 496023 | -2274 | 29145 | AN7572 |
| 1559 | CONTIG129 | 539046 | 539307 | 1.23 | 8.63E-02 | transcription_start_site | + | 539067 | 539067 | 109   | 29173 | AN7582 |
| 1559 | CONTIG129 | 539046 | 539307 | 1.23 | 8.63E-02 | transcription_start_site | + | 538901 | 538901 | 275   | 29172 | AN7582 |



|      |           |        |        |      |          |                          |   |        |        |       |       |        |
|------|-----------|--------|--------|------|----------|--------------------------|---|--------|--------|-------|-------|--------|
| 1559 | CONTIG129 | 539046 | 539307 | 1.23 | 8.63E-02 | transcription_start_site | + | 539500 | 539500 | -323  | 29174 | AN7582 |
| 1559 | CONTIG129 | 539046 | 539307 | 1.23 | 8.63E-02 | transcription_start_site | + | 538718 | 538718 | 458   | 29171 | AN7582 |
| 1559 | CONTIG129 | 539046 | 539307 | 1.23 | 8.63E-02 | transcription_start_site | + | 539669 | 539669 | -492  | 29175 | AN7582 |
| 1559 | CONTIG129 | 539046 | 539307 | 1.23 | 8.63E-02 | transcription_start_site | + | 539743 | 539743 | -566  | 29176 | AN7582 |
| 157  | CONTIG129 | 544202 | 544491 | 2.93 | 0.00E+00 | transcription_start_site | - | 542713 | 542713 | -1633 | 29177 | AN7583 |
| 157  | CONTIG129 | 544202 | 544491 | 2.93 | 0.00E+00 | transcription_start_site | - | 542273 | 542273 | -2073 | 29178 | AN7583 |
| 1507 | CONTIG129 | 549977 | 550266 | 1.27 | 7.66E-02 | transcription_start_site | - | 548914 | 548914 | -1207 | 29179 | AN7584 |
| 1507 | CONTIG129 | 549977 | 550266 | 1.27 | 7.66E-02 | transcription_start_site | - | 548855 | 548855 | -1266 | 29180 | AN7584 |
| 1507 | CONTIG129 | 549977 | 550266 | 1.27 | 7.66E-02 | transcription_start_site | - | 548269 | 548269 | -1852 | 29181 | AN7584 |
| 1507 | CONTIG129 | 549977 | 550266 | 1.27 | 7.66E-02 | transcription_start_site | + | 550333 | 550333 | -211  | 29182 | AN7585 |
| 1507 | CONTIG129 | 549977 | 550266 | 1.27 | 7.66E-02 | transcription_start_site | + | 550577 | 550577 | -455  | 29183 | AN7585 |
| 1507 | CONTIG129 | 549977 | 550266 | 1.27 | 7.66E-02 | transcription_start_site | + | 550940 | 550940 | -818  | 29184 | AN7585 |
| 1507 | CONTIG129 | 549977 | 550266 | 1.27 | 7.66E-02 | transcription_start_site | + | 551118 | 551118 | -996  | 29185 | AN7585 |
| 1507 | CONTIG129 | 549977 | 550266 | 1.27 | 7.66E-02 | transcription_start_site | + | 552871 | 552871 | -2749 | 29186 | AN7586 |
| 1507 | CONTIG129 | 549977 | 550266 | 1.27 | 7.66E-02 | transcription_start_site | + | 553040 | 553040 | -2918 | 29187 | AN7586 |
| 1507 | CONTIG129 | 549977 | 550266 | 1.27 | 7.66E-02 | transcription_start_site | + | 553560 | 553560 | -3438 | 29188 | AN7586 |
| 573  | CONTIG129 | 555988 | 556492 | 2.22 | 4.01E-03 | transcription_start_site | + | 556587 | 556587 | -347  | 29189 | AN7587 |
| 573  | CONTIG129 | 555988 | 556492 | 2.22 | 4.01E-03 | transcription_start_site | + | 556888 | 556888 | -648  | 29190 | AN7587 |
| 1269 | CONTIG129 | 573694 | 574118 | 1.47 | 4.20E-02 | transcription_start_site | - | 571190 | 571190 | -2716 | 29194 | AN7590 |
| 1677 | CONTIG129 | 571519 | 572078 | 1.15 | 6.50E-02 | transcription_start_site | - | 571190 | 571190 | -608  | 29194 | AN7590 |
| 1269 | CONTIG129 | 573694 | 574118 | 1.47 | 4.20E-02 | transcription_start_site | - | 573877 | 573877 | -29   | 29195 | AN7591 |
| 1269 | CONTIG129 | 573694 | 574118 | 1.47 | 4.20E-02 | transcription_start_site | - | 573668 | 573668 | -238  | 29196 | AN7591 |
| 1269 | CONTIG129 | 573694 | 574118 | 1.47 | 4.20E-02 | transcription_start_site | - | 573366 | 573366 | -540  | 29197 | AN7591 |
| 1269 | CONTIG129 | 573694 | 574118 | 1.47 | 4.20E-02 | transcription_start_site | - | 574582 | 574582 | 676   | 29207 | AN7592 |
| 1269 | CONTIG129 | 573694 | 574118 | 1.47 | 4.20E-02 | transcription_start_site | - | 574753 | 574753 | 847   | 29206 | AN7592 |
| 725  | CONTIG129 | 612836 | 613105 | 2.02 | 7.70E-03 | transcription_start_site | - | 608669 | 608669 | -4301 | 29228 | AN7600 |
| 725  | CONTIG129 | 612836 | 613105 | 2.02 | 7.70E-03 | transcription_start_site | - | 608538 | 608538 | -4432 | 29229 | AN7600 |
| 725  | CONTIG129 | 612836 | 613105 | 2.02 | 7.70E-03 | transcription_start_site | - | 608348 | 608348 | -4622 | 29230 | AN7600 |
| 1744 | CONTIG129 | 608930 | 609217 | 1.11 | 1.22E-01 | transcription_start_site | - | 608669 | 608669 | -404  | 29228 | AN7600 |
| 1744 | CONTIG129 | 608930 | 609217 | 1.11 | 1.22E-01 | transcription_start_site | - | 608538 | 608538 | -535  | 29229 | AN7600 |
| 1744 | CONTIG129 | 608930 | 609217 | 1.11 | 1.22E-01 | transcription_start_site | - | 608348 | 608348 | -725  | 29230 | AN7600 |
| 1745 | CONTIG129 | 610970 | 611304 | 1.11 | 1.22E-01 | transcription_start_site | - | 608669 | 608669 | -2468 | 29228 | AN7600 |
| 1745 | CONTIG129 | 610970 | 611304 | 1.11 | 1.22E-01 | transcription_start_site | - | 608538 | 608538 | -2599 | 29229 | AN7600 |
| 1745 | CONTIG129 | 610970 | 611304 | 1.11 | 1.22E-01 | transcription_start_site | - | 608348 | 608348 | -2789 | 29230 | AN7600 |
| 725  | CONTIG129 | 612836 | 613105 | 2.02 | 7.70E-03 | transcription_start_site | - | 610761 | 610761 | -2209 | 29232 | AN7601 |
| 725  | CONTIG129 | 612836 | 613105 | 2.02 | 7.70E-03 | transcription_start_site | - | 610630 | 610630 | -2340 | 29233 | AN7601 |
| 1745 | CONTIG129 | 610970 | 611304 | 1.11 | 1.22E-01 | transcription_start_site | - | 610761 | 610761 | -376  | 29232 | AN7601 |
| 1745 | CONTIG129 | 610970 | 611304 | 1.11 | 1.22E-01 | transcription_start_site | - | 610630 | 610630 | -507  | 29233 | AN7601 |
| 725  | CONTIG129 | 612836 | 613105 | 2.02 | 7.70E-03 | transcription_start_site | - | 612691 | 612691 | -279  | 29234 | AN7602 |
| 725  | CONTIG129 | 612836 | 613105 | 2.02 | 7.70E-03 | transcription_start_site | - | 612584 | 612584 | -386  | 29235 | AN7602 |
| 725  | CONTIG129 | 612836 | 613105 | 2.02 | 7.70E-03 | transcription_start_site | - | 612497 | 612497 | -473  | 29236 | AN7602 |
| 725  | CONTIG129 | 612836 | 613105 | 2.02 | 7.70E-03 | transcription_start_site | - | 612311 | 612311 | -659  | 29237 | AN7602 |
| 725  | CONTIG129 | 612836 | 613105 | 2.02 | 7.70E-03 | transcription_start_site | - | 611755 | 611755 | -1215 | 29238 | AN7602 |
| 1745 | CONTIG129 | 610970 | 611304 | 1.11 | 1.22E-01 | transcription_start_site | - | 611755 | 611755 | 618   | 29238 | AN7602 |
| 725  | CONTIG129 | 612836 | 613105 | 2.02 | 7.70E-03 | transcription_start_site | + | 613179 | 613179 | -208  | 29239 | AN7603 |
| 725  | CONTIG129 | 612836 | 613105 | 2.02 | 7.70E-03 | transcription_start_site | + | 613287 | 613287 | -316  | 29240 | AN7603 |
| 725  | CONTIG129 | 612836 | 613105 | 2.02 | 7.70E-03 | transcription_start_site | + | 613377 | 613377 | -406  | 29241 | AN7603 |
| 725  | CONTIG129 | 612836 | 613105 | 2.02 | 7.70E-03 | transcription_start_site | + | 613523 | 613523 | -552  | 29242 | AN7603 |
| 725  | CONTIG129 | 612836 | 613105 | 2.02 | 7.70E-03 | transcription_start_site | + | 613885 | 613885 | -914  | 29243 | AN7603 |
| 1744 | CONTIG129 | 608930 | 609217 | 1.11 | 1.22E-01 | transcription_start_site | + | 613179 | 613179 | -4105 | 29239 | AN7603 |
| 1744 | CONTIG129 | 608930 | 609217 | 1.11 | 1.22E-01 | transcription_start_site | + | 613287 | 613287 | -4213 | 29240 | AN7603 |
| 1744 | CONTIG129 | 608930 | 609217 | 1.11 | 1.22E-01 | transcription_start_site | + | 613377 | 613377 | -4303 | 29241 | AN7603 |
| 1744 | CONTIG129 | 608930 | 609217 | 1.11 | 1.22E-01 | transcription_start_site | + | 613523 | 613523 | -4449 | 29242 | AN7603 |
| 1744 | CONTIG129 | 608930 | 609217 | 1.11 | 1.22E-01 | transcription_start_site | + | 613885 | 613885 | -4811 | 29243 | AN7603 |
| 1745 | CONTIG129 | 610970 | 611304 | 1.11 | 1.22E-01 | transcription_start_site | + | 613179 | 613179 | -2042 | 29239 | AN7603 |
| 1745 | CONTIG129 | 610970 | 611304 | 1.11 | 1.22E-01 | transcription_start_site | + | 613287 | 613287 | -2150 | 29240 | AN7603 |
| 1745 | CONTIG129 | 610970 | 611304 | 1.11 | 1.22E-01 | transcription_start_site | + | 613377 | 613377 | -2240 | 29241 | AN7603 |

|      |           |        |        |      |          |                          |   |        |        |       |       |        |
|------|-----------|--------|--------|------|----------|--------------------------|---|--------|--------|-------|-------|--------|
| 1745 | CONTIG129 | 610970 | 611304 | 1.11 | 1.22E-01 | transcription_start_site | + | 613523 | 613523 | -2386 | 29242 | AN7603 |
| 1745 | CONTIG129 | 610970 | 611304 | 1.11 | 1.22E-01 | transcription_start_site | + | 613885 | 613885 | -2748 | 29243 | AN7603 |
| 1995 | CONTIG129 | 621677 | 622041 | 0.95 | 1.97E-01 | transcription_start_site | - | 618538 | 618538 | -3321 | 29244 | AN7604 |
| 1995 | CONTIG129 | 621677 | 622041 | 0.95 | 1.97E-01 | transcription_start_site | - | 617482 | 617482 | -4377 | 29245 | AN7604 |
| 1995 | CONTIG129 | 621677 | 622041 | 0.95 | 1.97E-01 | transcription_start_site | - | 620409 | 620409 | -1450 | 29248 | AN7605 |
| 1995 | CONTIG129 | 621677 | 622041 | 0.95 | 1.97E-01 | transcription_start_site | - | 620325 | 620325 | -1534 | 29249 | AN7605 |
| 1995 | CONTIG129 | 621677 | 622041 | 0.95 | 1.97E-01 | transcription_start_site | - | 619716 | 619716 | -2143 | 29250 | AN7605 |
| 849  | CONTIG130 | 1296   | 1705   | 1.88 | 1.06E-02 | transcription_start_site | + | 1759   | 1759   | -258  | 29251 | AN7607 |
| 849  | CONTIG130 | 1296   | 1705   | 1.88 | 1.06E-02 | transcription_start_site | + | 5158   | 5158   | -3657 | 29252 | AN7608 |
| 849  | CONTIG130 | 1296   | 1705   | 1.88 | 1.06E-02 | transcription_start_site | + | 5790   | 5790   | -4289 | 29253 | AN7608 |
| 849  | CONTIG130 | 1296   | 1705   | 1.88 | 1.06E-02 | transcription_start_site | + | 6092   | 6092   | -4591 | 29254 | AN7608 |
| 1425 | CONTIG130 | 11186  | 11762  | 1.33 | 6.04E-02 | transcription_start_site | + | 12329  | 12329  | -855  | 29257 | AN7610 |
| 1425 | CONTIG130 | 11186  | 11762  | 1.33 | 6.04E-02 | transcription_start_site | + | 12670  | 12670  | -1196 | 29258 | AN7610 |
| 1425 | CONTIG130 | 11186  | 11762  | 1.33 | 6.04E-02 | transcription_start_site | + | 14928  | 14928  | -3454 | 29259 | AN7610 |
| 1425 | CONTIG130 | 11186  | 11762  | 1.33 | 6.04E-02 | transcription_start_site | + | 15551  | 15551  | -4077 | 29260 | AN7611 |
| 1714 | CONTIG130 | 33303  | 33589  | 1.13 | 1.08E-01 | transcription_start_site | - | 29400  | 29400  | -4046 | 29276 | AN7616 |
| 1714 | CONTIG130 | 33303  | 33589  | 1.13 | 1.08E-01 | transcription_start_site | - | 28596  | 28596  | -4850 | 29277 | AN7616 |
| 1376 | CONTIG130 | 35043  | 35753  | 1.37 | 2.66E-02 | transcription_start_site | - | 32961  | 32961  | -2437 | 29283 | AN7618 |
| 1376 | CONTIG130 | 35043  | 35753  | 1.37 | 2.66E-02 | transcription_start_site | - | 32878  | 32878  | -2520 | 29284 | AN7618 |
| 1711 | CONTIG130 | 37438  | 38008  | 1.13 | 6.50E-02 | transcription_start_site | - | 32961  | 32961  | -4762 | 29283 | AN7618 |
| 1711 | CONTIG130 | 37438  | 38008  | 1.13 | 6.50E-02 | transcription_start_site | - | 32878  | 32878  | -4845 | 29284 | AN7618 |
| 1714 | CONTIG130 | 33303  | 33589  | 1.13 | 1.08E-01 | transcription_start_site | - | 32961  | 32961  | -485  | 29283 | AN7618 |
| 1714 | CONTIG130 | 33303  | 33589  | 1.13 | 1.08E-01 | transcription_start_site | - | 32878  | 32878  | -568  | 29284 | AN7618 |
| 1376 | CONTIG130 | 35043  | 35753  | 1.37 | 2.66E-02 | transcription_start_site | - | 34761  | 34761  | -637  | 29285 | AN7619 |
| 1711 | CONTIG130 | 37438  | 38008  | 1.13 | 6.50E-02 | transcription_start_site | - | 34761  | 34761  | -2962 | 29285 | AN7619 |
| 1880 | CONTIG130 | 42392  | 43636  | 1.02 | 5.40E-02 | transcription_start_site | - | 42484  | 42484  | -530  | 29286 | AN7621 |
| 1880 | CONTIG130 | 42392  | 43636  | 1.02 | 5.40E-02 | transcription_start_site | + | 44085  | 44085  | -1071 | 29287 | AN7622 |
| 717  | CONTIG130 | 56854  | 57203  | 2.03 | 7.08E-03 | transcription_start_site | - | 55588  | 55588  | -1440 | 29293 | AN7625 |
| 717  | CONTIG130 | 56854  | 57203  | 2.03 | 7.08E-03 | transcription_start_site | - | 54834  | 54834  | -2194 | 29294 | AN7625 |
| 1253 | CONTIG130 | 57239  | 57883  | 1.48 | 3.70E-02 | transcription_start_site | - | 55588  | 55588  | -1973 | 29293 | AN7625 |
| 1253 | CONTIG130 | 57239  | 57883  | 1.48 | 3.70E-02 | transcription_start_site | - | 54834  | 54834  | -2727 | 29294 | AN7625 |
| 717  | CONTIG130 | 56854  | 57203  | 2.03 | 7.08E-03 | transcription_start_site | + | 59016  | 59016  | -1987 | 29295 | AN7626 |
| 717  | CONTIG130 | 56854  | 57203  | 2.03 | 7.08E-03 | transcription_start_site | + | 59175  | 59175  | -2146 | 29296 | AN7626 |
| 717  | CONTIG130 | 56854  | 57203  | 2.03 | 7.08E-03 | transcription_start_site | + | 59366  | 59366  | -2337 | 29297 | AN7626 |
| 1253 | CONTIG130 | 57239  | 57883  | 1.48 | 3.70E-02 | transcription_start_site | + | 59016  | 59016  | -1455 | 29295 | AN7626 |
| 1253 | CONTIG130 | 57239  | 57883  | 1.48 | 3.70E-02 | transcription_start_site | + | 59175  | 59175  | -1614 | 29296 | AN7626 |
| 1253 | CONTIG130 | 57239  | 57883  | 1.48 | 3.70E-02 | transcription_start_site | + | 59366  | 59366  | -1805 | 29297 | AN7626 |
| 925  | CONTIG130 | 73592  | 74151  | 1.8  | 9.40E-04 | transcription_start_site | - | 68657  | 68657  | -5214 | 29298 | AN7628 |
| 925  | CONTIG130 | 73592  | 74151  | 1.8  | 9.40E-04 | transcription_start_site | - | 71314  | 71314  | -2557 | 29303 | AN7630 |
| 925  | CONTIG130 | 73592  | 74151  | 1.8  | 9.40E-04 | transcription_start_site | - | 73613  | 73613  | -258  | 29304 | AN7631 |
| 925  | CONTIG130 | 73592  | 74151  | 1.8  | 9.40E-04 | transcription_start_site | - | 73282  | 73282  | -589  | 29305 | AN7631 |
| 925  | CONTIG130 | 73592  | 74151  | 1.8  | 9.40E-04 | transcription_start_site | - | 72807  | 72807  | -1064 | 29306 | AN7631 |
| 925  | CONTIG130 | 73592  | 74151  | 1.8  | 9.40E-04 | transcription_start_site | - | 72535  | 72535  | -1336 | 29307 | AN7631 |
| 925  | CONTIG130 | 73592  | 74151  | 1.8  | 9.40E-04 | transcription_start_site | - | 72318  | 72318  | -1553 | 29308 | AN7631 |
| 925  | CONTIG130 | 73592  | 74151  | 1.8  | 9.40E-04 | transcription_start_site | - | 71940  | 71940  | -1931 | 29309 | AN7631 |
| 1426 | CONTIG130 | 86263  | 86614  | 1.33 | 6.04E-02 | transcription_start_site | - | 83204  | 83204  | -3234 | 29318 | AN7634 |
| 1426 | CONTIG130 | 86263  | 86614  | 1.33 | 6.04E-02 | transcription_start_site | - | 82876  | 82876  | -3562 | 29319 | AN7634 |
| 1426 | CONTIG130 | 86263  | 86614  | 1.33 | 6.04E-02 | transcription_start_site | - | 81978  | 81978  | -4460 | 29320 | AN7634 |
| 1426 | CONTIG130 | 86263  | 86614  | 1.33 | 6.04E-02 | transcription_start_site | - | 81716  | 81716  | -4722 | 29321 | AN7634 |
| 1426 | CONTIG130 | 86263  | 86614  | 1.33 | 6.04E-02 | transcription_start_site | - | 81521  | 81521  | -4917 | 29322 | AN7634 |
| 1426 | CONTIG130 | 86263  | 86614  | 1.33 | 6.04E-02 | transcription_start_site | - | 86298  | 86298  | -140  | 29324 | AN7636 |
| 1426 | CONTIG130 | 86263  | 86614  | 1.33 | 6.04E-02 | transcription_start_site | - | 86097  | 86097  | -341  | 29325 | AN7636 |
| 1426 | CONTIG130 | 86263  | 86614  | 1.33 | 6.04E-02 | transcription_start_site | - | 85591  | 85591  | -847  | 29326 | AN7636 |
| 1426 | CONTIG130 | 86263  | 86614  | 1.33 | 6.04E-02 | transcription_start_site | + | 87436  | 87436  | -997  | 29327 | AN7637 |
| 1426 | CONTIG130 | 86263  | 86614  | 1.33 | 6.04E-02 | transcription_start_site | + | 87837  | 87837  | -1398 | 29328 | AN7637 |
| 155  | CONTIG130 | 105453 | 105727 | 2.93 | 0.00E+00 | transcription_start_site | - | 105244 | 105244 | -346  | 29338 | AN7640 |
| 155  | CONTIG130 | 105453 | 105727 | 2.93 | 0.00E+00 | transcription_start_site | - | 104351 | 104351 | -1239 | 29339 | AN7640 |

|      |           |        |        |      |          |                          |   |        |        |       |       |        |
|------|-----------|--------|--------|------|----------|--------------------------|---|--------|--------|-------|-------|--------|
| 203  | CONTIG130 | 125035 | 125319 | 2.81 | 0.00E+00 | transcription_start_site | + | 128721 | 128721 | -3544 | 29363 | AN7648 |
| 203  | CONTIG130 | 125035 | 125319 | 2.81 | 0.00E+00 | transcription_start_site | + | 128972 | 128972 | -3795 | 29364 | AN7648 |
| 203  | CONTIG130 | 125035 | 125319 | 2.81 | 0.00E+00 | transcription_start_site | + | 129100 | 129100 | -3923 | 29365 | AN7648 |
| 844  | CONTIG130 | 132903 | 133552 | 1.88 | 4.22E-03 | transcription_start_site | - | 132511 | 132511 | -716  | 29367 | AN7649 |
| 844  | CONTIG130 | 132903 | 133552 | 1.88 | 4.22E-03 | transcription_start_site | - | 132408 | 132408 | -819  | 29368 | AN7649 |
| 844  | CONTIG130 | 132903 | 133552 | 1.88 | 4.22E-03 | transcription_start_site | - | 132237 | 132237 | -990  | 29369 | AN7649 |
| 844  | CONTIG130 | 132903 | 133552 | 1.88 | 4.22E-03 | transcription_start_site | + | 134383 | 134383 | -1155 | 29370 | AN7650 |
| 844  | CONTIG130 | 132903 | 133552 | 1.88 | 4.22E-03 | transcription_start_site | + | 134746 | 134746 | -1518 | 29371 | AN7650 |
| 844  | CONTIG130 | 132903 | 133552 | 1.88 | 4.22E-03 | transcription_start_site | + | 134961 | 134961 | -1733 | 29372 | AN7650 |
| 844  | CONTIG130 | 132903 | 133552 | 1.88 | 4.22E-03 | transcription_start_site | + | 137309 | 137309 | -4081 | 29373 | AN7650 |
| 844  | CONTIG130 | 132903 | 133552 | 1.88 | 4.22E-03 | transcription_start_site | + | 137551 | 137551 | -4323 | 29374 | AN7650 |
| 844  | CONTIG130 | 132903 | 133552 | 1.88 | 4.22E-03 | transcription_start_site | + | 137736 | 137736 | -4508 | 29375 | AN7650 |
| 844  | CONTIG130 | 132903 | 133552 | 1.88 | 4.22E-03 | transcription_start_site | + | 138338 | 138338 | -5110 | 29376 | AN7650 |
| 819  | CONTIG130 | 153226 | 153670 | 1.91 | 9.96E-03 | transcription_start_site | - | 152366 | 152366 | -1082 | 29383 | AN7654 |
| 819  | CONTIG130 | 153226 | 153670 | 1.91 | 9.96E-03 | transcription_start_site | + | 157625 | 157625 | -4177 | 29384 | AN7656 |
| 1336 | CONTIG130 | 161342 | 161601 | 1.41 | 4.78E-02 | transcription_start_site | + | 162367 | 162367 | -895  | 29385 | AN7657 |
| 1336 | CONTIG130 | 161342 | 161601 | 1.41 | 4.78E-02 | transcription_start_site | + | 163017 | 163017 | -1545 | 29386 | AN7657 |
| 2012 | CONTIG130 | 169733 | 170087 | 0.94 | 1.97E-01 | transcription_start_site | + | 170324 | 170324 | -414  | 29387 | AN7659 |
| 2012 | CONTIG130 | 169733 | 170087 | 0.94 | 1.97E-01 | transcription_start_site | + | 170471 | 170471 | -561  | 29388 | AN7659 |
| 2012 | CONTIG130 | 169733 | 170087 | 0.94 | 1.97E-01 | transcription_start_site | + | 170698 | 170698 | -788  | 29389 | AN7659 |
| 2012 | CONTIG130 | 169733 | 170087 | 0.94 | 1.97E-01 | transcription_start_site | + | 171245 | 171245 | -1335 | 29390 | AN7659 |
| 2012 | CONTIG130 | 169733 | 170087 | 0.94 | 1.97E-01 | transcription_start_site | + | 171528 | 171528 | -1618 | 29391 | AN7659 |
| 2012 | CONTIG130 | 169733 | 170087 | 0.94 | 1.97E-01 | transcription_start_site | + | 171784 | 171784 | -1874 | 29392 | AN7659 |
| 1170 | CONTIG130 | 177164 | 177508 | 1.56 | 3.01E-02 | transcription_start_site | + | 177848 | 177848 | -512  | 29393 | AN7661 |
| 508  | CONTIG130 | 181292 | 181566 | 2.3  | 2.32E-03 | transcription_start_site | + | 181902 | 181902 | -473  | 29394 | AN7662 |
| 508  | CONTIG130 | 181292 | 181566 | 2.3  | 2.32E-03 | transcription_start_site | + | 182572 | 182572 | -1143 | 29395 | AN7662 |
| 508  | CONTIG130 | 181292 | 181566 | 2.3  | 2.32E-03 | transcription_start_site | + | 182685 | 182685 | -1256 | 29396 | AN7662 |
| 508  | CONTIG130 | 181292 | 181566 | 2.3  | 2.32E-03 | transcription_start_site | + | 182915 | 182915 | -1486 | 29397 | AN7662 |
| 508  | CONTIG130 | 181292 | 181566 | 2.3  | 2.32E-03 | transcription_start_site | + | 183357 | 183357 | -1928 | 29398 | AN7662 |
| 508  | CONTIG130 | 181292 | 181566 | 2.3  | 2.32E-03 | transcription_start_site | + | 183565 | 183565 | -2136 | 29399 | AN7662 |
| 1170 | CONTIG130 | 177164 | 177508 | 1.56 | 3.01E-02 | transcription_start_site | + | 181902 | 181902 | -4566 | 29394 | AN7662 |
| 479  | CONTIG130 | 191257 | 191526 | 2.34 | 1.77E-03 | transcription_start_site | + | 192406 | 192406 | -1014 | 29402 | AN7665 |
| 479  | CONTIG130 | 191257 | 191526 | 2.34 | 1.77E-03 | transcription_start_site | + | 192796 | 192796 | -1404 | 29403 | AN7665 |
| 479  | CONTIG130 | 191257 | 191526 | 2.34 | 1.77E-03 | transcription_start_site | + | 194213 | 194213 | -2821 | 29404 | AN7666 |
| 479  | CONTIG130 | 191257 | 191526 | 2.34 | 1.77E-03 | transcription_start_site | + | 195677 | 195677 | -4285 | 29405 | AN7666 |
| 596  | CONTIG130 | 205730 | 206095 | 2.19 | 4.01E-03 | transcription_start_site | - | 201840 | 201840 | -4072 | 29409 | AN7668 |
| 596  | CONTIG130 | 205730 | 206095 | 2.19 | 4.01E-03 | transcription_start_site | - | 201786 | 201786 | -4126 | 29410 | AN7668 |
| 596  | CONTIG130 | 205730 | 206095 | 2.19 | 4.01E-03 | transcription_start_site | - | 201601 | 201601 | -4311 | 29411 | AN7668 |
| 596  | CONTIG130 | 205730 | 206095 | 2.19 | 4.01E-03 | transcription_start_site | - | 201208 | 201208 | -4704 | 29412 | AN7668 |
| 596  | CONTIG130 | 205730 | 206095 | 2.19 | 4.01E-03 | transcription_start_site | + | 206461 | 206461 | -548  | 29417 | AN7670 |
| 596  | CONTIG130 | 205730 | 206095 | 2.19 | 4.01E-03 | transcription_start_site | + | 208790 | 208790 | -2877 | 29418 | AN7671 |
| 596  | CONTIG130 | 205730 | 206095 | 2.19 | 4.01E-03 | transcription_start_site | + | 209014 | 209014 | -3101 | 29419 | AN7671 |
| 596  | CONTIG130 | 205730 | 206095 | 2.19 | 4.01E-03 | transcription_start_site | + | 209111 | 209111 | -3198 | 29420 | AN7671 |
| 596  | CONTIG130 | 205730 | 206095 | 2.19 | 4.01E-03 | transcription_start_site | + | 209327 | 209327 | -3414 | 29421 | AN7671 |
| 596  | CONTIG130 | 205730 | 206095 | 2.19 | 4.01E-03 | transcription_start_site | + | 209650 | 209650 | -3737 | 29422 | AN7671 |
| 596  | CONTIG130 | 205730 | 206095 | 2.19 | 4.01E-03 | transcription_start_site | + | 210688 | 210688 | -4775 | 29423 | AN7672 |
| 648  | CONTIG130 | 236489 | 236776 | 2.11 | 5.08E-03 | transcription_start_site | - | 234428 | 234428 | -2204 | 29451 | AN7680 |
| 648  | CONTIG130 | 236489 | 236776 | 2.11 | 5.08E-03 | transcription_start_site | - | 234279 | 234279 | -2353 | 29452 | AN7680 |
| 648  | CONTIG130 | 236489 | 236776 | 2.11 | 5.08E-03 | transcription_start_site | - | 233455 | 233455 | -3177 | 29453 | AN7680 |
| 646  | CONTIG130 | 239934 | 240578 | 2.11 | 2.65E-03 | transcription_start_site | - | 236164 | 236164 | -4092 | 29454 | AN7681 |
| 646  | CONTIG130 | 239934 | 240578 | 2.11 | 2.65E-03 | transcription_start_site | - | 236104 | 236104 | -4152 | 29455 | AN7681 |
| 648  | CONTIG130 | 236489 | 236776 | 2.11 | 5.08E-03 | transcription_start_site | - | 236164 | 236164 | -468  | 29454 | AN7681 |
| 648  | CONTIG130 | 236489 | 236776 | 2.11 | 5.08E-03 | transcription_start_site | - | 236104 | 236104 | -528  | 29455 | AN7681 |
| 646  | CONTIG130 | 239934 | 240578 | 2.11 | 2.65E-03 | transcription_start_site | - | 237841 | 237841 | -2415 | 29456 | AN7682 |
| 646  | CONTIG130 | 239934 | 240578 | 2.11 | 2.65E-03 | transcription_start_site | - | 237781 | 237781 | -2475 | 29457 | AN7682 |
| 646  | CONTIG130 | 239934 | 240578 | 2.11 | 2.65E-03 | transcription_start_site | - | 237661 | 237661 | -2595 | 29458 | AN7682 |
| 646  | CONTIG130 | 239934 | 240578 | 2.11 | 2.65E-03 | transcription_start_site | - | 237450 | 237450 | -2806 | 29459 | AN7682 |

|      |           |        |        |      |          |                          |   |        |        |       |       |        |
|------|-----------|--------|--------|------|----------|--------------------------|---|--------|--------|-------|-------|--------|
| 646  | CONTIG130 | 239934 | 240578 | 2.11 | 2.65E-03 | transcription_start_site | - | 236887 | 236887 | -3369 | 29460 | AN7682 |
| 648  | CONTIG130 | 236489 | 236776 | 2.11 | 5.08E-03 | transcription_start_site | - | 236887 | 236887 | 254   | 29460 | AN7682 |
| 648  | CONTIG130 | 236489 | 236776 | 2.11 | 5.08E-03 | transcription_start_site | - | 237450 | 237450 | 817   | 29459 | AN7682 |
| 648  | CONTIG130 | 236489 | 236776 | 2.11 | 5.08E-03 | transcription_start_site | - | 237661 | 237661 | 1028  | 29458 | AN7682 |
| 1587 | CONTIG130 | 242259 | 243363 | 1.21 | 3.47E-02 | transcription_start_site | - | 237841 | 237841 | -4970 | 29456 | AN7682 |
| 1587 | CONTIG130 | 242259 | 243363 | 1.21 | 3.47E-02 | transcription_start_site | - | 237781 | 237781 | -5030 | 29457 | AN7682 |
| 1587 | CONTIG130 | 242259 | 243363 | 1.21 | 3.47E-02 | transcription_start_site | - | 237661 | 237661 | -5150 | 29458 | AN7682 |
| 1587 | CONTIG130 | 242259 | 243363 | 1.21 | 3.47E-02 | transcription_start_site | - | 237450 | 237450 | -5361 | 29459 | AN7682 |
| 646  | CONTIG130 | 239934 | 240578 | 2.11 | 2.65E-03 | transcription_start_site | + | 240730 | 240730 | -474  | 29461 | AN7683 |
| 646  | CONTIG130 | 239934 | 240578 | 2.11 | 2.65E-03 | transcription_start_site | + | 240827 | 240827 | -571  | 29462 | AN7683 |
| 646  | CONTIG130 | 239934 | 240578 | 2.11 | 2.65E-03 | transcription_start_site | + | 241147 | 241147 | -891  | 29463 | AN7683 |
| 648  | CONTIG130 | 236489 | 236776 | 2.11 | 5.08E-03 | transcription_start_site | + | 240730 | 240730 | -4097 | 29461 | AN7683 |
| 648  | CONTIG130 | 236489 | 236776 | 2.11 | 5.08E-03 | transcription_start_site | + | 240827 | 240827 | -4194 | 29462 | AN7683 |
| 648  | CONTIG130 | 236489 | 236776 | 2.11 | 5.08E-03 | transcription_start_site | + | 241147 | 241147 | -4514 | 29463 | AN7683 |
| 646  | CONTIG130 | 239934 | 240578 | 2.11 | 2.65E-03 | transcription_start_site | + | 242667 | 242667 | -2411 | 29464 | AN7684 |
| 646  | CONTIG130 | 239934 | 240578 | 2.11 | 2.65E-03 | transcription_start_site | + | 242932 | 242932 | -2676 | 29465 | AN7684 |
| 646  | CONTIG130 | 239934 | 240578 | 2.11 | 2.65E-03 | transcription_start_site | + | 243884 | 243884 | -3628 | 29466 | AN7684 |
| 646  | CONTIG130 | 239934 | 240578 | 2.11 | 2.65E-03 | transcription_start_site | + | 243997 | 243997 | -3741 | 29467 | AN7684 |
| 1587 | CONTIG130 | 242259 | 243363 | 1.21 | 3.47E-02 | transcription_start_site | + | 242932 | 242932 | -121  | 29465 | AN7684 |
| 1587 | CONTIG130 | 242259 | 243363 | 1.21 | 3.47E-02 | transcription_start_site | + | 242667 | 242667 | 144   | 29464 | AN7684 |
| 1587 | CONTIG130 | 242259 | 243363 | 1.21 | 3.47E-02 | transcription_start_site | + | 243884 | 243884 | -1073 | 29466 | AN7684 |
| 1587 | CONTIG130 | 242259 | 243363 | 1.21 | 3.47E-02 | transcription_start_site | + | 243997 | 243997 | -1186 | 29467 | AN7684 |
| 1427 | CONTIG130 | 258539 | 258953 | 1.33 | 6.04E-02 | transcription_start_site | - | 255284 | 255284 | -3462 | 29468 | AN7686 |
| 1427 | CONTIG130 | 258539 | 258953 | 1.33 | 6.04E-02 | transcription_start_site | - | 255193 | 255193 | -3553 | 29469 | AN7686 |
| 1427 | CONTIG130 | 258539 | 258953 | 1.33 | 6.04E-02 | transcription_start_site | - | 254935 | 254935 | -3811 | 29470 | AN7686 |
| 1427 | CONTIG130 | 258539 | 258953 | 1.33 | 6.04E-02 | transcription_start_site | - | 254753 | 254753 | -3993 | 29471 | AN7686 |
| 1427 | CONTIG130 | 258539 | 258953 | 1.33 | 6.04E-02 | transcription_start_site | - | 254651 | 254651 | -4095 | 29472 | AN7686 |
| 1946 | CONTIG130 | 259889 | 260153 | 0.98 | 1.76E-01 | transcription_start_site | - | 255284 | 255284 | -4737 | 29468 | AN7686 |
| 1946 | CONTIG130 | 259889 | 260153 | 0.98 | 1.76E-01 | transcription_start_site | - | 255193 | 255193 | -4828 | 29469 | AN7686 |
| 1946 | CONTIG130 | 259889 | 260153 | 0.98 | 1.76E-01 | transcription_start_site | - | 254935 | 254935 | -5086 | 29470 | AN7686 |
| 1427 | CONTIG130 | 258539 | 258953 | 1.33 | 6.04E-02 | transcription_start_site | - | 258438 | 258438 | -308  | 29473 | AN7687 |
| 1427 | CONTIG130 | 258539 | 258953 | 1.33 | 6.04E-02 | transcription_start_site | - | 258057 | 258057 | -689  | 29474 | AN7687 |
| 1427 | CONTIG130 | 258539 | 258953 | 1.33 | 6.04E-02 | transcription_start_site | - | 257924 | 257924 | -822  | 29475 | AN7687 |
| 1427 | CONTIG130 | 258539 | 258953 | 1.33 | 6.04E-02 | transcription_start_site | - | 257105 | 257105 | -1641 | 29476 | AN7687 |
| 1427 | CONTIG130 | 258539 | 258953 | 1.33 | 6.04E-02 | transcription_start_site | - | 256585 | 256585 | -2161 | 29477 | AN7687 |
| 1946 | CONTIG130 | 259889 | 260153 | 0.98 | 1.76E-01 | transcription_start_site | - | 258438 | 258438 | -1583 | 29473 | AN7687 |
| 1946 | CONTIG130 | 259889 | 260153 | 0.98 | 1.76E-01 | transcription_start_site | - | 258057 | 258057 | -1964 | 29474 | AN7687 |
| 1946 | CONTIG130 | 259889 | 260153 | 0.98 | 1.76E-01 | transcription_start_site | - | 257924 | 257924 | -2097 | 29475 | AN7687 |
| 1946 | CONTIG130 | 259889 | 260153 | 0.98 | 1.76E-01 | transcription_start_site | - | 257105 | 257105 | -2916 | 29476 | AN7687 |
| 1946 | CONTIG130 | 259889 | 260153 | 0.98 | 1.76E-01 | transcription_start_site | - | 256585 | 256585 | -3436 | 29477 | AN7687 |
| 1427 | CONTIG130 | 258539 | 258953 | 1.33 | 6.04E-02 | transcription_start_site | + | 261635 | 261635 | -2889 | 29478 | AN7689 |
| 1427 | CONTIG130 | 258539 | 258953 | 1.33 | 6.04E-02 | transcription_start_site | + | 261803 | 261803 | -3057 | 29479 | AN7689 |
| 1946 | CONTIG130 | 259889 | 260153 | 0.98 | 1.76E-01 | transcription_start_site | + | 261635 | 261635 | -1614 | 29478 | AN7689 |
| 1946 | CONTIG130 | 259889 | 260153 | 0.98 | 1.76E-01 | transcription_start_site | + | 261803 | 261803 | -1782 | 29479 | AN7689 |
| 283  | CONTIG130 | 263719 | 264128 | 2.66 | 0.00E+00 | transcription_start_site | + | 264632 | 264632 | -708  | 29480 | AN7690 |
| 283  | CONTIG130 | 263719 | 264128 | 2.66 | 0.00E+00 | transcription_start_site | + | 265244 | 265244 | -1320 | 29481 | AN7690 |
| 1166 | CONTIG130 | 266119 | 266544 | 1.56 | 1.44E-02 | transcription_start_site | + | 265244 | 265244 | 1087  | 29481 | AN7690 |
| 1946 | CONTIG130 | 259889 | 260153 | 0.98 | 1.76E-01 | transcription_start_site | + | 264632 | 264632 | -4611 | 29480 | AN7690 |
| 2013 | CONTIG130 | 264319 | 264893 | 0.94 | 1.97E-01 | transcription_start_site | + | 264632 | 264632 | -26   | 29480 | AN7690 |
| 2013 | CONTIG130 | 264319 | 264893 | 0.94 | 1.97E-01 | transcription_start_site | + | 265244 | 265244 | -638  | 29481 | AN7690 |
| 283  | CONTIG130 | 263719 | 264128 | 2.66 | 0.00E+00 | transcription_start_site | + | 267073 | 267073 | -3149 | 29482 | AN7691 |
| 283  | CONTIG130 | 263719 | 264128 | 2.66 | 0.00E+00 | transcription_start_site | + | 267682 | 267682 | -3758 | 29483 | AN7691 |
| 283  | CONTIG130 | 263719 | 264128 | 2.66 | 0.00E+00 | transcription_start_site | + | 268707 | 268707 | -4783 | 29484 | AN7691 |
| 1166 | CONTIG130 | 266119 | 266544 | 1.56 | 1.44E-02 | transcription_start_site | + | 267073 | 267073 | -741  | 29482 | AN7691 |
| 1166 | CONTIG130 | 266119 | 266544 | 1.56 | 1.44E-02 | transcription_start_site | + | 267682 | 267682 | -1350 | 29483 | AN7691 |
| 1166 | CONTIG130 | 266119 | 266544 | 1.56 | 1.44E-02 | transcription_start_site | + | 268707 | 268707 | -2375 | 29484 | AN7691 |
| 2013 | CONTIG130 | 264319 | 264893 | 0.94 | 1.97E-01 | transcription_start_site | + | 267073 | 267073 | -2467 | 29482 | AN7691 |

|                |        |        |      |          |                          |   |        |        |       |       |        |
|----------------|--------|--------|------|----------|--------------------------|---|--------|--------|-------|-------|--------|
| 2013 CONTIG130 | 264319 | 264893 | 0.94 | 1.97E-01 | transcription_start_site | + | 267682 | 267682 | -3076 | 29483 | AN7691 |
| 2013 CONTIG130 | 264319 | 264893 | 0.94 | 1.97E-01 | transcription_start_site | + | 268707 | 268707 | -4101 | 29484 | AN7691 |
| 1776 CONTIG130 | 271220 | 271634 | 1.09 | 1.22E-01 | transcription_start_site | - | 269839 | 269839 | -1588 | 29485 | AN7692 |
| 1776 CONTIG130 | 271220 | 271634 | 1.09 | 1.22E-01 | transcription_start_site | - | 269611 | 269611 | -1816 | 29486 | AN7692 |
| 1776 CONTIG130 | 271220 | 271634 | 1.09 | 1.22E-01 | transcription_start_site | - | 269386 | 269386 | -2041 | 29487 | AN7692 |
| 1776 CONTIG130 | 271220 | 271634 | 1.09 | 1.22E-01 | transcription_start_site | - | 269152 | 269152 | -2275 | 29488 | AN7692 |
| 1776 CONTIG130 | 271220 | 271634 | 1.09 | 1.22E-01 | transcription_start_site | - | 268992 | 268992 | -2435 | 29489 | AN7692 |
| 1379 CONTIG130 | 287029 | 287468 | 1.37 | 5.36E-02 | transcription_start_site | - | 287471 | 287471 | 222   | 29497 | AN7697 |
| 1379 CONTIG130 | 287029 | 287468 | 1.37 | 5.36E-02 | transcription_start_site | - | 285869 | 285869 | -1379 | 29498 | AN7697 |
| 1379 CONTIG130 | 287029 | 287468 | 1.37 | 5.36E-02 | transcription_start_site | - | 285184 | 285184 | -2064 | 29499 | AN7697 |
| 204 CONTIG130  | 297154 | 298110 | 2.81 | 0.00E+00 | transcription_start_site | - | 293404 | 293404 | -4228 | 29504 | AN7699 |
| 204 CONTIG130  | 297154 | 298110 | 2.81 | 0.00E+00 | transcription_start_site | - | 292713 | 292713 | -4919 | 29505 | AN7699 |
| 204 CONTIG130  | 297154 | 298110 | 2.81 | 0.00E+00 | transcription_start_site | - | 296517 | 296517 | -1115 | 29506 | AN7700 |
| 1320 CONTIG131 | 10128  | 10552  | 1.42 | 2.05E-02 | transcription_start_site | - | 7153   | 7153   | -3187 | 29529 | AN7706 |
| 1320 CONTIG131 | 10128  | 10552  | 1.42 | 2.05E-02 | transcription_start_site | - | 7051   | 7051   | -3289 | 29530 | AN7706 |
| 1320 CONTIG131 | 10128  | 10552  | 1.42 | 2.05E-02 | transcription_start_site | - | 6694   | 6694   | -3646 | 29531 | AN7706 |
| 1320 CONTIG131 | 10128  | 10552  | 1.42 | 2.05E-02 | transcription_start_site | - | 6588   | 6588   | -3752 | 29532 | AN7706 |
| 1320 CONTIG131 | 10128  | 10552  | 1.42 | 2.05E-02 | transcription_start_site | - | 6479   | 6479   | -3861 | 29533 | AN7706 |
| 1320 CONTIG131 | 10128  | 10552  | 1.42 | 2.05E-02 | transcription_start_site | - | 6366   | 6366   | -3974 | 29534 | AN7706 |
| 1320 CONTIG131 | 10128  | 10552  | 1.42 | 2.05E-02 | transcription_start_site | - | 6240   | 6240   | -4100 | 29535 | AN7706 |
| 1320 CONTIG131 | 10128  | 10552  | 1.42 | 2.05E-02 | transcription_start_site | - | 9841   | 9841   | -499  | 29536 | AN7707 |
| 1320 CONTIG131 | 10128  | 10552  | 1.42 | 2.05E-02 | transcription_start_site | - | 9517   | 9517   | -823  | 29537 | AN7707 |
| 1320 CONTIG131 | 10128  | 10552  | 1.42 | 2.05E-02 | transcription_start_site | - | 7853   | 7853   | -2487 | 29538 | AN7707 |
| 1320 CONTIG131 | 10128  | 10552  | 1.42 | 2.05E-02 | transcription_start_site | + | 11284  | 11284  | -944  | 29539 | AN7708 |
| 1320 CONTIG131 | 10128  | 10552  | 1.42 | 2.05E-02 | transcription_start_site | + | 11853  | 11853  | -1513 | 29540 | AN7708 |
| 325 CONTIG131  | 14927  | 15276  | 2.57 | 0.00E+00 | transcription_start_site | - | 13861  | 13861  | -1240 | 29541 | AN7709 |
| 325 CONTIG131  | 14927  | 15276  | 2.57 | 0.00E+00 | transcription_start_site | - | 13428  | 13428  | -1673 | 29542 | AN7709 |
| 325 CONTIG131  | 14927  | 15276  | 2.57 | 0.00E+00 | transcription_start_site | - | 13319  | 13319  | -1782 | 29543 | AN7709 |
| 325 CONTIG131  | 14927  | 15276  | 2.57 | 0.00E+00 | transcription_start_site | - | 13096  | 13096  | -2005 | 29544 | AN7709 |
| 1100 CONTIG131 | 17627  | 18068  | 1.61 | 9.96E-03 | transcription_start_site | - | 13861  | 13861  | -3986 | 29541 | AN7709 |
| 1100 CONTIG131 | 17627  | 18068  | 1.61 | 9.96E-03 | transcription_start_site | - | 13428  | 13428  | -4419 | 29542 | AN7709 |
| 1100 CONTIG131 | 17627  | 18068  | 1.61 | 9.96E-03 | transcription_start_site | - | 13319  | 13319  | -4528 | 29543 | AN7709 |
| 1100 CONTIG131 | 17627  | 18068  | 1.61 | 9.96E-03 | transcription_start_site | - | 13096  | 13096  | -4751 | 29544 | AN7709 |
| 325 CONTIG131  | 14927  | 15276  | 2.57 | 0.00E+00 | transcription_start_site | + | 15384  | 15384  | -282  | 29545 | AN7710 |
| 325 CONTIG131  | 14927  | 15276  | 2.57 | 0.00E+00 | transcription_start_site | + | 15456  | 15456  | -354  | 29546 | AN7710 |
| 1320 CONTIG131 | 10128  | 10552  | 1.42 | 2.05E-02 | transcription_start_site | + | 15384  | 15384  | -5044 | 29545 | AN7710 |
| 1320 CONTIG131 | 10128  | 10552  | 1.42 | 2.05E-02 | transcription_start_site | + | 15456  | 15456  | -5116 | 29546 | AN7710 |
| 325 CONTIG131  | 14927  | 15276  | 2.57 | 0.00E+00 | transcription_start_site | + | 18331  | 18331  | -3229 | 29547 | AN7711 |
| 325 CONTIG131  | 14927  | 15276  | 2.57 | 0.00E+00 | transcription_start_site | + | 18440  | 18440  | -3338 | 29548 | AN7711 |
| 325 CONTIG131  | 14927  | 15276  | 2.57 | 0.00E+00 | transcription_start_site | + | 18702  | 18702  | -3600 | 29549 | AN7711 |
| 325 CONTIG131  | 14927  | 15276  | 2.57 | 0.00E+00 | transcription_start_site | + | 19004  | 19004  | -3902 | 29550 | AN7711 |
| 1100 CONTIG131 | 17627  | 18068  | 1.61 | 9.96E-03 | transcription_start_site | + | 18331  | 18331  | -483  | 29547 | AN7711 |
| 1100 CONTIG131 | 17627  | 18068  | 1.61 | 9.96E-03 | transcription_start_site | + | 18440  | 18440  | -592  | 29548 | AN7711 |
| 1100 CONTIG131 | 17627  | 18068  | 1.61 | 9.96E-03 | transcription_start_site | + | 18702  | 18702  | -854  | 29549 | AN7711 |
| 1100 CONTIG131 | 17627  | 18068  | 1.61 | 9.96E-03 | transcription_start_site | + | 19004  | 19004  | -1156 | 29550 | AN7711 |
| 1064 CONTIG131 | 20403  | 20827  | 1.65 | 3.99E-03 | transcription_start_site | - | 20535  | 20535  | -80   | 29552 | AN7712 |
| 1064 CONTIG131 | 20403  | 20827  | 1.65 | 3.99E-03 | transcription_start_site | - | 20810  | 20810  | 195   | 29551 | AN7712 |
| 1064 CONTIG131 | 20403  | 20827  | 1.65 | 3.99E-03 | transcription_start_site | - | 19849  | 19849  | -766  | 29553 | AN7712 |
| 1064 CONTIG131 | 20403  | 20827  | 1.65 | 3.99E-03 | transcription_start_site | - | 19618  | 19618  | -997  | 29554 | AN7712 |
| 1064 CONTIG131 | 20403  | 20827  | 1.65 | 3.99E-03 | transcription_start_site | + | 22182  | 22182  | -1567 | 29555 | AN7713 |
| 1064 CONTIG131 | 20403  | 20827  | 1.65 | 3.99E-03 | transcription_start_site | + | 22388  | 22388  | -1773 | 29556 | AN7713 |
| 1100 CONTIG131 | 17627  | 18068  | 1.61 | 9.96E-03 | transcription_start_site | + | 22182  | 22182  | -4334 | 29555 | AN7713 |
| 1100 CONTIG131 | 17627  | 18068  | 1.61 | 9.96E-03 | transcription_start_site | + | 22388  | 22388  | -4540 | 29556 | AN7713 |
| 1064 CONTIG131 | 20403  | 20827  | 1.65 | 3.99E-03 | transcription_start_site | + | 25805  | 25805  | -5190 | 29557 | AN7714 |
| 760 CONTIG131  | 33546  | 34053  | 1.98 | 1.77E-03 | transcription_start_site | - | 31548  | 31548  | -2251 | 29563 | AN7716 |
| 760 CONTIG131  | 33546  | 34053  | 1.98 | 1.77E-03 | transcription_start_site | - | 33497  | 33497  | -302  | 29564 | AN7717 |
| 579 CONTIG131  | 50571  | 50980  | 2.21 | 2.06E-04 | transcription_start_site | - | 47224  | 47224  | -3551 | 29574 | AN7722 |

|      |           |       |        |      |          |                          |   |        |        |       |       |        |
|------|-----------|-------|--------|------|----------|--------------------------|---|--------|--------|-------|-------|--------|
| 579  | CONTIG131 | 50571 | 50980  | 2.21 | 2.06E-04 | transcription_start_site | - | 46714  | 46714  | -4061 | 29575 | AN7722 |
| 579  | CONTIG131 | 50571 | 50980  | 2.21 | 2.06E-04 | transcription_start_site | - | 45789  | 45789  | -4986 | 29576 | AN7722 |
| 579  | CONTIG131 | 50571 | 50980  | 2.21 | 2.06E-04 | transcription_start_site | - | 50118  | 50118  | -657  | 29578 | AN7724 |
| 579  | CONTIG131 | 50571 | 50980  | 2.21 | 2.06E-04 | transcription_start_site | - | 49726  | 49726  | -1049 | 29579 | AN7724 |
| 579  | CONTIG131 | 50571 | 50980  | 2.21 | 2.06E-04 | transcription_start_site | + | 51088  | 51088  | -312  | 29580 | AN7725 |
| 579  | CONTIG131 | 50571 | 50980  | 2.21 | 2.06E-04 | transcription_start_site | + | 51244  | 51244  | -468  | 29581 | AN7725 |
| 579  | CONTIG131 | 50571 | 50980  | 2.21 | 2.06E-04 | transcription_start_site | + | 51489  | 51489  | -713  | 29582 | AN7725 |
| 2035 | CONTIG131 | 78170 | 78444  | 0.92 | 1.22E-01 | transcription_start_site | - | 77702  | 77702  | -605  | 29601 | AN7729 |
| 2035 | CONTIG131 | 78170 | 78444  | 0.92 | 1.22E-01 | transcription_start_site | - | 77352  | 77352  | -955  | 29602 | AN7729 |
| 2035 | CONTIG131 | 78170 | 78444  | 0.92 | 1.22E-01 | transcription_start_site | - | 74388  | 74388  | -3919 | 29603 | AN7729 |
| 2035 | CONTIG131 | 78170 | 78444  | 0.92 | 1.22E-01 | transcription_start_site | - | 73344  | 73344  | -4963 | 29604 | AN7729 |
| 2035 | CONTIG131 | 78170 | 78444  | 0.92 | 1.22E-01 | transcription_start_site | - | 73215  | 73215  | -5092 | 29605 | AN7729 |
| 1037 | CONTIG131 | 99845 | 100254 | 1.68 | 7.70E-03 | transcription_start_site | + | 100947 | 100947 | -897  | 29617 | AN7734 |
| 1037 | CONTIG131 | 99845 | 100254 | 1.68 | 7.70E-03 | transcription_start_site | + | 101522 | 101522 | -1472 | 29618 | AN7734 |
| 2237 | CONTIG132 | 31586 | 32021  | 0.76 | 1.76E-01 | transcription_start_site | - | 28601  | 28601  | -3202 | 29651 | AN7748 |
| 2237 | CONTIG132 | 31586 | 32021  | 0.76 | 1.76E-01 | transcription_start_site | - | 28267  | 28267  | -3536 | 29652 | AN7748 |
| 2237 | CONTIG132 | 31586 | 32021  | 0.76 | 1.76E-01 | transcription_start_site | - | 28135  | 28135  | -3668 | 29653 | AN7748 |
| 2237 | CONTIG132 | 31586 | 32021  | 0.76 | 1.76E-01 | transcription_start_site | - | 27860  | 27860  | -3943 | 29654 | AN7748 |
| 2300 | CONTIG132 | 33021 | 34264  | 0.67 | 1.41E-01 | transcription_start_site | - | 28601  | 28601  | -5041 | 29651 | AN7748 |
| 2300 | CONTIG132 | 33021 | 34264  | 0.67 | 1.41E-01 | transcription_start_site | - | 28267  | 28267  | -5375 | 29652 | AN7748 |
| 2300 | CONTIG132 | 33021 | 34264  | 0.67 | 1.41E-01 | transcription_start_site | - | 28135  | 28135  | -5507 | 29653 | AN7748 |
| 2237 | CONTIG132 | 31586 | 32021  | 0.76 | 1.76E-01 | transcription_start_site | + | 34386  | 34386  | -2582 | 29655 | AN7749 |
| 2237 | CONTIG132 | 31586 | 32021  | 0.76 | 1.76E-01 | transcription_start_site | + | 34545  | 34545  | -2741 | 29656 | AN7749 |
| 2237 | CONTIG132 | 31586 | 32021  | 0.76 | 1.76E-01 | transcription_start_site | + | 34764  | 34764  | -2960 | 29657 | AN7749 |
| 2237 | CONTIG132 | 31586 | 32021  | 0.76 | 1.76E-01 | transcription_start_site | + | 35307  | 35307  | -3503 | 29658 | AN7749 |
| 2300 | CONTIG132 | 33021 | 34264  | 0.67 | 1.41E-01 | transcription_start_site | + | 34386  | 34386  | -743  | 29655 | AN7749 |
| 2300 | CONTIG132 | 33021 | 34264  | 0.67 | 1.41E-01 | transcription_start_site | + | 34545  | 34545  | -902  | 29656 | AN7749 |
| 2300 | CONTIG132 | 33021 | 34264  | 0.67 | 1.41E-01 | transcription_start_site | + | 34764  | 34764  | -1121 | 29657 | AN7749 |
| 2300 | CONTIG132 | 33021 | 34264  | 0.67 | 1.41E-01 | transcription_start_site | + | 35307  | 35307  | -1664 | 29658 | AN7749 |
| 2099 | CONTIG132 | 36992 | 37486  | 0.88 | 1.08E-01 | transcription_start_site | + | 37901  | 37901  | -662  | 29659 | AN7750 |
| 2099 | CONTIG132 | 36992 | 37486  | 0.88 | 1.08E-01 | transcription_start_site | + | 38192  | 38192  | -953  | 29660 | AN7750 |
| 2099 | CONTIG132 | 36992 | 37486  | 0.88 | 1.08E-01 | transcription_start_site | + | 38361  | 38361  | -1122 | 29661 | AN7750 |
| 2099 | CONTIG132 | 36992 | 37486  | 0.88 | 1.08E-01 | transcription_start_site | + | 38493  | 38493  | -1254 | 29662 | AN7750 |
| 2099 | CONTIG132 | 36992 | 37486  | 0.88 | 1.08E-01 | transcription_start_site | + | 38610  | 38610  | -1371 | 29663 | AN7750 |
| 2099 | CONTIG132 | 36992 | 37486  | 0.88 | 1.08E-01 | transcription_start_site | + | 38989  | 38989  | -1750 | 29664 | AN7750 |
| 2099 | CONTIG132 | 36992 | 37486  | 0.88 | 1.08E-01 | transcription_start_site | + | 39838  | 39838  | -2599 | 29665 | AN7750 |
| 2099 | CONTIG132 | 36992 | 37486  | 0.88 | 1.08E-01 | transcription_start_site | + | 40054  | 40054  | -2815 | 29666 | AN7750 |
| 2099 | CONTIG132 | 36992 | 37486  | 0.88 | 1.08E-01 | transcription_start_site | + | 40541  | 40541  | -3302 | 29667 | AN7750 |
| 2300 | CONTIG132 | 33021 | 34264  | 0.67 | 1.41E-01 | transcription_start_site | + | 37901  | 37901  | -4258 | 29659 | AN7750 |
| 2300 | CONTIG132 | 33021 | 34264  | 0.67 | 1.41E-01 | transcription_start_site | + | 38192  | 38192  | -4549 | 29660 | AN7750 |
| 2300 | CONTIG132 | 33021 | 34264  | 0.67 | 1.41E-01 | transcription_start_site | + | 38361  | 38361  | -4718 | 29661 | AN7750 |
| 2300 | CONTIG132 | 33021 | 34264  | 0.67 | 1.41E-01 | transcription_start_site | + | 38493  | 38493  | -4850 | 29662 | AN7750 |
| 2300 | CONTIG132 | 33021 | 34264  | 0.67 | 1.41E-01 | transcription_start_site | + | 38610  | 38610  | -4967 | 29663 | AN7750 |
| 2300 | CONTIG132 | 33021 | 34264  | 0.67 | 1.41E-01 | transcription_start_site | + | 38989  | 38989  | -5346 | 29664 | AN7750 |
| 234  | CONTIG132 | 54007 | 54426  | 2.74 | 0.00E+00 | transcription_start_site | - | 49212  | 49212  | -5004 | 29668 | AN7752 |
| 234  | CONTIG132 | 54007 | 54426  | 2.74 | 0.00E+00 | transcription_start_site | - | 53659  | 53659  | -557  | 29675 | AN7754 |
| 234  | CONTIG132 | 54007 | 54426  | 2.74 | 0.00E+00 | transcription_start_site | - | 53354  | 53354  | -862  | 29676 | AN7754 |
| 234  | CONTIG132 | 54007 | 54426  | 2.74 | 0.00E+00 | transcription_start_site | - | 52696  | 52696  | -1520 | 29677 | AN7754 |
| 234  | CONTIG132 | 54007 | 54426  | 2.74 | 0.00E+00 | transcription_start_site | - | 52600  | 52600  | -1616 | 29678 | AN7754 |
| 2203 | CONTIG132 | 55217 | 55781  | 0.79 | 1.54E-01 | transcription_start_site | - | 53659  | 53659  | -1840 | 29675 | AN7754 |
| 2203 | CONTIG132 | 55217 | 55781  | 0.79 | 1.54E-01 | transcription_start_site | - | 53354  | 53354  | -2145 | 29676 | AN7754 |
| 2203 | CONTIG132 | 55217 | 55781  | 0.79 | 1.54E-01 | transcription_start_site | - | 52696  | 52696  | -2803 | 29677 | AN7754 |
| 2203 | CONTIG132 | 55217 | 55781  | 0.79 | 1.54E-01 | transcription_start_site | - | 52600  | 52600  | -2899 | 29678 | AN7754 |
| 2203 | CONTIG132 | 55217 | 55781  | 0.79 | 1.54E-01 | transcription_start_site | - | 55637  | 55637  | 138   | 29679 | AN7755 |
| 234  | CONTIG132 | 54007 | 54426  | 2.74 | 0.00E+00 | transcription_start_site | + | 55871  | 55871  | -1654 | 29680 | AN7756 |
| 234  | CONTIG132 | 54007 | 54426  | 2.74 | 0.00E+00 | transcription_start_site | + | 56652  | 56652  | -2435 | 29681 | AN7756 |
| 234  | CONTIG132 | 54007 | 54426  | 2.74 | 0.00E+00 | transcription_start_site | + | 56899  | 56899  | -2682 | 29682 | AN7756 |



|      |           |        |        |      |          |                          |   |        |        |       |       |        |
|------|-----------|--------|--------|------|----------|--------------------------|---|--------|--------|-------|-------|--------|
| 2203 | CONTIG132 | 55217  | 55781  | 0.79 | 1.54E-01 | transcription_start_site | + | 55871  | 55871  | -372  | 29680 | AN7756 |
| 2203 | CONTIG132 | 55217  | 55781  | 0.79 | 1.54E-01 | transcription_start_site | + | 56652  | 56652  | -1153 | 29681 | AN7756 |
| 2203 | CONTIG132 | 55217  | 55781  | 0.79 | 1.54E-01 | transcription_start_site | + | 56899  | 56899  | -1400 | 29682 | AN7756 |
| 809  | CONTIG132 | 61442  | 61791  | 1.92 | 1.09E-03 | transcription_start_site | + | 62563  | 62563  | -946  | 29683 | AN7757 |
| 809  | CONTIG132 | 61442  | 61791  | 1.92 | 1.09E-03 | transcription_start_site | + | 63075  | 63075  | -1458 | 29684 | AN7757 |
| 235  | CONTIG132 | 79726  | 80600  | 2.74 | 0.00E+00 | transcription_start_site | - | 76463  | 76463  | -3700 | 29694 | AN7761 |
| 235  | CONTIG132 | 79726  | 80600  | 2.74 | 0.00E+00 | transcription_start_site | - | 76161  | 76161  | -4002 | 29695 | AN7761 |
| 2170 | CONTIG132 | 90906  | 91259  | 0.82 | 1.38E-01 | transcription_start_site | + | 91256  | 91256  | -173  | 29702 | AN7765 |
| 2170 | CONTIG132 | 90906  | 91259  | 0.82 | 1.38E-01 | transcription_start_site | + | 90861  | 90861  | 221   | 29701 | AN7765 |
| 2170 | CONTIG132 | 90906  | 91259  | 0.82 | 1.38E-01 | transcription_start_site | + | 90731  | 90731  | 351   | 29700 | AN7765 |
| 2170 | CONTIG132 | 90906  | 91259  | 0.82 | 1.38E-01 | transcription_start_site | + | 91660  | 91660  | -577  | 29703 | AN7765 |
| 2170 | CONTIG132 | 90906  | 91259  | 0.82 | 1.38E-01 | transcription_start_site | + | 93675  | 93675  | -2592 | 29707 | AN7767 |
| 758  | CONTIG132 | 116643 | 117127 | 1.98 | 7.06E-04 | transcription_start_site | - | 113300 | 113300 | -3585 | 29736 | AN7775 |
| 758  | CONTIG132 | 116643 | 117127 | 1.98 | 7.06E-04 | transcription_start_site | - | 113066 | 113066 | -3819 | 29737 | AN7775 |
| 758  | CONTIG132 | 116643 | 117127 | 1.98 | 7.06E-04 | transcription_start_site | - | 112911 | 112911 | -3974 | 29738 | AN7775 |
| 758  | CONTIG132 | 116643 | 117127 | 1.98 | 7.06E-04 | transcription_start_site | + | 116048 | 116048 | 837   | 29742 | AN7776 |
| 758  | CONTIG132 | 116643 | 117127 | 1.98 | 7.06E-04 | transcription_start_site | + | 117209 | 117209 | -324  | 29743 | AN7777 |
| 758  | CONTIG132 | 116643 | 117127 | 1.98 | 7.06E-04 | transcription_start_site | + | 119475 | 119475 | -2590 | 29744 | AN7778 |
| 758  | CONTIG132 | 116643 | 117127 | 1.98 | 7.06E-04 | transcription_start_site | + | 119862 | 119862 | -2977 | 29745 | AN7778 |
| 1408 | CONTIG132 | 128943 | 129507 | 1.34 | 1.80E-02 | transcription_start_site | - | 127017 | 127017 | -2208 | 29750 | AN7781 |
| 1408 | CONTIG132 | 128943 | 129507 | 1.34 | 1.80E-02 | transcription_start_site | - | 126603 | 126603 | -2622 | 29751 | AN7781 |
| 1408 | CONTIG132 | 128943 | 129507 | 1.34 | 1.80E-02 | transcription_start_site | - | 126359 | 126359 | -2866 | 29752 | AN7781 |
| 1408 | CONTIG132 | 128943 | 129507 | 1.34 | 1.80E-02 | transcription_start_site | - | 128666 | 128666 | -559  | 29753 | AN7782 |
| 1408 | CONTIG132 | 128943 | 129507 | 1.34 | 1.80E-02 | transcription_start_site | + | 129744 | 129744 | -519  | 29754 | AN7783 |
| 1408 | CONTIG132 | 128943 | 129507 | 1.34 | 1.80E-02 | transcription_start_site | + | 134154 | 134154 | -4929 | 29755 | AN7783 |
| 1408 | CONTIG132 | 128943 | 129507 | 1.34 | 1.80E-02 | transcription_start_site | + | 134470 | 134470 | -5245 | 29756 | AN7783 |
| 2171 | CONTIG132 | 143043 | 143377 | 0.82 | 1.38E-01 | transcription_start_site | - | 142861 | 142861 | -349  | 29757 | AN7785 |
| 2171 | CONTIG132 | 143043 | 143377 | 0.82 | 1.38E-01 | transcription_start_site | - | 142596 | 142596 | -614  | 29758 | AN7785 |
| 2171 | CONTIG132 | 143043 | 143377 | 0.82 | 1.38E-01 | transcription_start_site | - | 144328 | 144328 | 1118  | 29760 | AN7786 |
| 2171 | CONTIG132 | 143043 | 143377 | 0.82 | 1.38E-01 | transcription_start_site | + | 146315 | 146315 | -3105 | 29766 | AN7788 |
| 2171 | CONTIG132 | 143043 | 143377 | 0.82 | 1.38E-01 | transcription_start_site | + | 147656 | 147656 | -4446 | 29767 | AN7788 |
| 2171 | CONTIG132 | 143043 | 143377 | 0.82 | 1.38E-01 | transcription_start_site | + | 148019 | 148019 | -4809 | 29768 | AN7788 |
| 1850 | CONTIG132 | 153303 | 154777 | 1.04 | 6.04E-02 | transcription_start_site | - | 150059 | 150059 | -3981 | 29769 | AN7789 |
| 1850 | CONTIG132 | 153303 | 154777 | 1.04 | 6.04E-02 | transcription_start_site | + | 158228 | 158228 | -4188 | 29772 | AN7792 |
| 759  | CONTIG132 | 166593 | 166927 | 1.98 | 7.06E-04 | transcription_start_site | + | 167459 | 167459 | -699  | 29778 | AN7795 |
| 759  | CONTIG132 | 166593 | 166927 | 1.98 | 7.06E-04 | transcription_start_site | + | 168004 | 168004 | -1244 | 29779 | AN7795 |
| 759  | CONTIG132 | 166593 | 166927 | 1.98 | 7.06E-04 | transcription_start_site | + | 168431 | 168431 | -1671 | 29780 | AN7795 |
| 2302 | CONTIG132 | 175502 | 175928 | 0.67 | 1.81E-01 | transcription_start_site | - | 170671 | 170671 | -5044 | 29781 | AN7796 |
| 2302 | CONTIG132 | 175502 | 175928 | 0.67 | 1.81E-01 | transcription_start_site | - | 172572 | 172572 | -3143 | 29783 | AN7797 |
| 2302 | CONTIG132 | 175502 | 175928 | 0.67 | 1.81E-01 | transcription_start_site | - | 175853 | 175853 | 138   | 29785 | AN7799 |
| 2202 | CONTIG132 | 217726 | 219200 | 0.79 | 9.90E-02 | transcription_start_site | + | 217505 | 217505 | 958   | 29824 | AN7815 |
| 2202 | CONTIG132 | 217726 | 219200 | 0.79 | 9.90E-02 | transcription_start_site | - | 219659 | 219659 | 1196  | 29825 | AN7816 |
| 2202 | CONTIG132 | 217726 | 219200 | 0.79 | 9.90E-02 | transcription_start_site | + | 221674 | 221674 | -3211 | 29828 | AN7818 |
| 2202 | CONTIG132 | 217726 | 219200 | 0.79 | 9.90E-02 | transcription_start_site | + | 222872 | 222872 | -4409 | 29829 | AN7818 |
| 1611 | CONTIG132 | 231771 | 232325 | 1.19 | 4.78E-03 | transcription_start_site | - | 228611 | 228611 | -3437 | 29834 | AN7821 |
| 1611 | CONTIG132 | 231771 | 232325 | 1.19 | 4.78E-03 | transcription_start_site | - | 228472 | 228472 | -3576 | 29835 | AN7821 |
| 1611 | CONTIG132 | 231771 | 232325 | 1.19 | 4.78E-03 | transcription_start_site | - | 227865 | 227865 | -4183 | 29836 | AN7821 |
| 1611 | CONTIG132 | 231771 | 232325 | 1.19 | 4.78E-03 | transcription_start_site | - | 227715 | 227715 | -4333 | 29837 | AN7821 |
| 1611 | CONTIG132 | 231771 | 232325 | 1.19 | 4.78E-03 | transcription_start_site | - | 229329 | 229329 | -2719 | 29838 | AN7822 |
| 1611 | CONTIG132 | 231771 | 232325 | 1.19 | 4.78E-03 | transcription_start_site | - | 232526 | 232526 | 478   | 29843 | AN7824 |
| 1611 | CONTIG132 | 231771 | 232325 | 1.19 | 4.78E-03 | transcription_start_site | + | 234254 | 234254 | -2206 | 29844 | AN7825 |
| 1611 | CONTIG132 | 231771 | 232325 | 1.19 | 4.78E-03 | transcription_start_site | + | 234921 | 234921 | -2873 | 29845 | AN7825 |
| 2368 | CONTIG133 | 31732  | 32537  | 0.45 | 1.54E-01 | transcription_start_site | - | 31424  | 31424  | -710  | 29887 | AN7839 |
| 2368 | CONTIG133 | 31732  | 32537  | 0.45 | 1.54E-01 | transcription_start_site | - | 31127  | 31127  | -1007 | 29888 | AN7839 |
| 2368 | CONTIG133 | 31732  | 32537  | 0.45 | 1.54E-01 | transcription_start_site | - | 30520  | 30520  | -1614 | 29889 | AN7839 |
| 2368 | CONTIG133 | 31732  | 32537  | 0.45 | 1.54E-01 | transcription_start_site | - | 30224  | 30224  | -1910 | 29890 | AN7839 |
| 2368 | CONTIG133 | 31732  | 32537  | 0.45 | 1.54E-01 | transcription_start_site | - | 29880  | 29880  | -2254 | 29891 | AN7839 |

|      |           |       |       |      |          |                          |   |       |       |       |       |        |
|------|-----------|-------|-------|------|----------|--------------------------|---|-------|-------|-------|-------|--------|
| 2368 | CONTIG133 | 31732 | 32537 | 0.45 | 1.54E-01 | transcription_start_site | - | 29584 | 29584 | -2550 | 29892 | AN7839 |
| 2368 | CONTIG133 | 31732 | 32537 | 0.45 | 1.54E-01 | transcription_start_site | - | 28791 | 28791 | -3343 | 29893 | AN7839 |
| 2368 | CONTIG133 | 31732 | 32537 | 0.45 | 1.54E-01 | transcription_start_site | - | 28572 | 28572 | -3562 | 29894 | AN7839 |
| 2368 | CONTIG133 | 31732 | 32537 | 0.45 | 1.54E-01 | transcription_start_site | - | 28129 | 28129 | -4005 | 29895 | AN7839 |
| 2368 | CONTIG133 | 31732 | 32537 | 0.45 | 1.54E-01 | transcription_start_site | - | 27762 | 27762 | -4372 | 29896 | AN7839 |
| 2368 | CONTIG133 | 31732 | 32537 | 0.45 | 1.54E-01 | transcription_start_site | - | 27659 | 27659 | -4475 | 29897 | AN7839 |
| 2368 | CONTIG133 | 31732 | 32537 | 0.45 | 1.54E-01 | transcription_start_site | - | 26961 | 26961 | -5173 | 29898 | AN7839 |
| 2358 | CONTIG133 | 63168 | 63729 | 0.5  | 6.50E-02 | transcription_start_site | - | 63582 | 63582 | 133   | 29934 | AN7847 |
| 2358 | CONTIG133 | 63168 | 63729 | 0.5  | 6.50E-02 | transcription_start_site | - | 63269 | 63269 | -179  | 29935 | AN7847 |
| 2358 | CONTIG133 | 63168 | 63729 | 0.5  | 6.50E-02 | transcription_start_site | - | 63687 | 63687 | 238   | 29933 | AN7847 |
| 2358 | CONTIG133 | 63168 | 63729 | 0.5  | 6.50E-02 | transcription_start_site | - | 63068 | 63068 | -380  | 29936 | AN7847 |
| 2358 | CONTIG133 | 63168 | 63729 | 0.5  | 6.50E-02 | transcription_start_site | - | 62798 | 62798 | -650  | 29937 | AN7847 |
| 2358 | CONTIG133 | 63168 | 63729 | 0.5  | 6.50E-02 | transcription_start_site | - | 64142 | 64142 | 693   | 29932 | AN7847 |
| 2358 | CONTIG133 | 63168 | 63729 | 0.5  | 6.50E-02 | transcription_start_site | - | 62698 | 62698 | -750  | 29938 | AN7847 |
| 2358 | CONTIG133 | 63168 | 63729 | 0.5  | 6.50E-02 | transcription_start_site | - | 64490 | 64490 | 1041  | 29931 | AN7847 |
| 1848 | CONTIG134 | 29264 | 29678 | 1.04 | 9.32E-03 | transcription_start_site | - | 26361 | 26361 | -3110 | 29977 | AN7857 |
| 1848 | CONTIG134 | 29264 | 29678 | 1.04 | 9.32E-03 | transcription_start_site | + | 31154 | 31154 | -1683 | 29980 | AN7859 |
| 1848 | CONTIG134 | 29264 | 29678 | 1.04 | 9.32E-03 | transcription_start_site | + | 31270 | 31270 | -1799 | 29981 | AN7859 |
| 1848 | CONTIG134 | 29264 | 29678 | 1.04 | 9.32E-03 | transcription_start_site | + | 32600 | 32600 | -3129 | 29982 | AN7859 |
| 2305 | CONTIG134 | 64505 | 64794 | 0.66 | 7.66E-02 | transcription_start_site | - | 59689 | 59689 | -4960 | 30006 | AN7866 |
| 2305 | CONTIG134 | 64505 | 64794 | 0.66 | 7.66E-02 | transcription_start_site | - | 63886 | 63886 | -763  | 30015 | AN7868 |
| 2305 | CONTIG134 | 64505 | 64794 | 0.66 | 7.66E-02 | transcription_start_site | - | 63741 | 63741 | -908  | 30016 | AN7868 |
| 2305 | CONTIG134 | 64505 | 64794 | 0.66 | 7.66E-02 | transcription_start_site | - | 63362 | 63362 | -1287 | 30017 | AN7868 |
| 2305 | CONTIG134 | 64505 | 64794 | 0.66 | 7.66E-02 | transcription_start_site | - | 63088 | 63088 | -1561 | 30018 | AN7868 |
| 2305 | CONTIG134 | 64505 | 64794 | 0.66 | 7.66E-02 | transcription_start_site | - | 65262 | 65262 | 612   | 30029 | AN7869 |
| 2305 | CONTIG134 | 64505 | 64794 | 0.66 | 7.66E-02 | transcription_start_site | - | 65328 | 65328 | 678   | 30028 | AN7869 |
| 2305 | CONTIG134 | 64505 | 64794 | 0.66 | 7.66E-02 | transcription_start_site | - | 65647 | 65647 | 997   | 30027 | AN7869 |
| 1395 | CONTIG134 | 77110 | 77617 | 1.35 | 7.06E-04 | transcription_start_site | - | 76663 | 76663 | -700  | 30035 | AN7872 |
| 2133 | CONTIG135 | 22671 | 22945 | 0.85 | 6.04E-02 | transcription_start_site | - | 22146 | 22146 | -662  | 30053 | AN7879 |
| 2133 | CONTIG135 | 22671 | 22945 | 0.85 | 6.04E-02 | transcription_start_site | - | 21867 | 21867 | -941  | 30054 | AN7879 |
| 2133 | CONTIG135 | 22671 | 22945 | 0.85 | 6.04E-02 | transcription_start_site | - | 20769 | 20769 | -2039 | 30055 | AN7879 |
| 2133 | CONTIG135 | 22671 | 22945 | 0.85 | 6.04E-02 | transcription_start_site | - | 20471 | 20471 | -2337 | 30056 | AN7879 |
| 2133 | CONTIG135 | 22671 | 22945 | 0.85 | 6.04E-02 | transcription_start_site | - | 19755 | 19755 | -3053 | 30057 | AN7879 |
| 2133 | CONTIG135 | 22671 | 22945 | 0.85 | 6.04E-02 | transcription_start_site | - | 18232 | 18232 | -4576 | 30058 | AN7879 |
| 2133 | CONTIG135 | 22671 | 22945 | 0.85 | 6.04E-02 | transcription_start_site | - | 18078 | 18078 | -4730 | 30059 | AN7879 |
| 2133 | CONTIG135 | 22671 | 22945 | 0.85 | 6.04E-02 | transcription_start_site | + | 23248 | 23248 | -440  | 30061 | AN7880 |
| 2133 | CONTIG135 | 22671 | 22945 | 0.85 | 6.04E-02 | transcription_start_site | + | 23490 | 23490 | -682  | 30062 | AN7880 |
| 2133 | CONTIG135 | 22671 | 22945 | 0.85 | 6.04E-02 | transcription_start_site | + | 24063 | 24063 | -1255 | 30063 | AN7880 |
| 2350 | CONTIG135 | 31437 | 32301 | 0.55 | 1.81E-01 | transcription_start_site | - | 30874 | 30874 | -995  | 30067 | AN7881 |
| 2350 | CONTIG135 | 31437 | 32301 | 0.55 | 1.81E-01 | transcription_start_site | - | 30740 | 30740 | -1129 | 30068 | AN7881 |
| 2350 | CONTIG135 | 31437 | 32301 | 0.55 | 1.81E-01 | transcription_start_site | - | 30532 | 30532 | -1337 | 30069 | AN7881 |
| 2350 | CONTIG135 | 31437 | 32301 | 0.55 | 1.81E-01 | transcription_start_site | - | 30408 | 30408 | -1461 | 30070 | AN7881 |
| 2350 | CONTIG135 | 31437 | 32301 | 0.55 | 1.81E-01 | transcription_start_site | - | 30075 | 30075 | -1794 | 30071 | AN7881 |
| 2350 | CONTIG135 | 31437 | 32301 | 0.55 | 1.81E-01 | transcription_start_site | - | 29652 | 29652 | -2217 | 30072 | AN7881 |
| 1499 | CONTIG135 | 37357 | 37626 | 1.27 | 7.70E-03 | transcription_start_site | - | 37005 | 37005 | -486  | 30073 | AN7883 |
| 1499 | CONTIG135 | 37357 | 37626 | 1.27 | 7.70E-03 | transcription_start_site | - | 36730 | 36730 | -761  | 30074 | AN7883 |
| 1499 | CONTIG135 | 37357 | 37626 | 1.27 | 7.70E-03 | transcription_start_site | - | 36506 | 36506 | -985  | 30075 | AN7883 |
| 1499 | CONTIG135 | 37357 | 37626 | 1.27 | 7.70E-03 | transcription_start_site | + | 38104 | 38104 | -612  | 30076 | AN7884 |
| 1499 | CONTIG135 | 37357 | 37626 | 1.27 | 7.70E-03 | transcription_start_site | + | 38667 | 38667 | -1175 | 30077 | AN7884 |
| 922  | CONTIG135 | 79876 | 80321 | 1.8  | 0.00E+00 | transcription_start_site | - | 79746 | 79746 | -352  | 30101 | AN7892 |
| 795  | CONTIG135 | 86926 | 87285 | 1.94 | 0.00E+00 | transcription_start_site | - | 85151 | 85151 | -1954 | 30102 | AN7893 |
| 795  | CONTIG135 | 86926 | 87285 | 1.94 | 0.00E+00 | transcription_start_site | - | 84780 | 84780 | -2325 | 30103 | AN7893 |
| 795  | CONTIG135 | 86926 | 87285 | 1.94 | 0.00E+00 | transcription_start_site | - | 84414 | 84414 | -2691 | 30104 | AN7893 |
| 795  | CONTIG135 | 86926 | 87285 | 1.94 | 0.00E+00 | transcription_start_site | + | 87701 | 87701 | -595  | 30106 | AN7895 |
| 795  | CONTIG135 | 86926 | 87285 | 1.94 | 0.00E+00 | transcription_start_site | + | 88333 | 88333 | -1227 | 30107 | AN7895 |
| 795  | CONTIG135 | 86926 | 87285 | 1.94 | 0.00E+00 | transcription_start_site | + | 91427 | 91427 | -4321 | 30108 | AN7896 |
| 795  | CONTIG135 | 86926 | 87285 | 1.94 | 0.00E+00 | transcription_start_site | + | 91725 | 91725 | -4619 | 30109 | AN7896 |

|      |           |        |        |      |          |                          |   |        |        |       |       |        |
|------|-----------|--------|--------|------|----------|--------------------------|---|--------|--------|-------|-------|--------|
| 795  | CONTIG135 | 86926  | 87285  | 1.94 | 0.00E+00 | transcription_start_site | + | 92139  | 92139  | -5033 | 30110 | AN7896 |
| 2065 | CONTIG135 | 100965 | 101380 | 0.9  | 4.78E-02 | transcription_start_site | - | 97640  | 97640  | -3532 | 30115 | AN7898 |
| 2065 | CONTIG135 | 100965 | 101380 | 0.9  | 4.78E-02 | transcription_start_site | - | 96120  | 96120  | -5052 | 30116 | AN7898 |
| 2065 | CONTIG135 | 100965 | 101380 | 0.9  | 4.78E-02 | transcription_start_site | - | 100962 | 100962 | -210  | 30118 | AN7900 |
| 2065 | CONTIG135 | 100965 | 101380 | 0.9  | 4.78E-02 | transcription_start_site | + | 102463 | 102463 | -1290 | 30119 | AN7901 |
| 2065 | CONTIG135 | 100965 | 101380 | 0.9  | 4.78E-02 | transcription_start_site | + | 102883 | 102883 | -1710 | 30120 | AN7901 |
| 2065 | CONTIG135 | 100965 | 101380 | 0.9  | 4.78E-02 | transcription_start_site | + | 103105 | 103105 | -1932 | 30121 | AN7901 |
| 2065 | CONTIG135 | 100965 | 101380 | 0.9  | 4.78E-02 | transcription_start_site | + | 103896 | 103896 | -2723 | 30122 | AN7901 |
| 1951 | CONTIG135 | 123470 | 123820 | 0.97 | 3.34E-02 | transcription_start_site | - | 118698 | 118698 | -4947 | 30133 | AN7905 |
| 1951 | CONTIG135 | 123470 | 123820 | 0.97 | 3.34E-02 | transcription_start_site | - | 123174 | 123174 | -471  | 30138 | AN7907 |
| 1951 | CONTIG135 | 123470 | 123820 | 0.97 | 3.34E-02 | transcription_start_site | - | 122985 | 122985 | -660  | 30139 | AN7907 |
| 2222 | CONTIG135 | 140785 | 141289 | 0.77 | 8.63E-02 | transcription_start_site | - | 137290 | 137290 | -3747 | 30145 | AN7911 |
| 2222 | CONTIG135 | 140785 | 141289 | 0.77 | 8.63E-02 | transcription_start_site | - | 137024 | 137024 | -4013 | 30146 | AN7911 |
| 2222 | CONTIG135 | 140785 | 141289 | 0.77 | 8.63E-02 | transcription_start_site | - | 140860 | 140860 | -177  | 30149 | AN7913 |
| 2222 | CONTIG135 | 140785 | 141289 | 0.77 | 8.63E-02 | transcription_start_site | + | 141414 | 141414 | -377  | 30150 | AN7914 |
| 2222 | CONTIG135 | 140785 | 141289 | 0.77 | 8.63E-02 | transcription_start_site | + | 141730 | 141730 | -693  | 30151 | AN7914 |
| 1174 | CONTIG135 | 146115 | 146468 | 1.55 | 1.45E-03 | transcription_start_site | - | 146016 | 146016 | -275  | 30152 | AN7915 |
| 1174 | CONTIG135 | 146115 | 146468 | 1.55 | 1.45E-03 | transcription_start_site | - | 145866 | 145866 | -425  | 30153 | AN7915 |
| 1174 | CONTIG135 | 146115 | 146468 | 1.55 | 1.45E-03 | transcription_start_site | - | 145379 | 145379 | -912  | 30154 | AN7915 |
| 1174 | CONTIG135 | 146115 | 146468 | 1.55 | 1.45E-03 | transcription_start_site | - | 147420 | 147420 | 1128  | 30160 | AN7916 |
| 2293 | CONTIG135 | 156230 | 157489 | 0.67 | 1.75E-02 | transcription_start_site | - | 151350 | 151350 | -5509 | 30161 | AN7917 |
| 2262 | CONTIG135 | 159015 | 159969 | 0.72 | 1.08E-01 | transcription_start_site | - | 155250 | 155250 | -4242 | 30166 | AN7919 |
| 2262 | CONTIG135 | 159015 | 159969 | 0.72 | 1.08E-01 | transcription_start_site | - | 154941 | 154941 | -4551 | 30167 | AN7919 |
| 2262 | CONTIG135 | 159015 | 159969 | 0.72 | 1.08E-01 | transcription_start_site | - | 154666 | 154666 | -4826 | 30168 | AN7919 |
| 2293 | CONTIG135 | 156230 | 157489 | 0.67 | 1.75E-02 | transcription_start_site | - | 155250 | 155250 | -1609 | 30166 | AN7919 |
| 2293 | CONTIG135 | 156230 | 157489 | 0.67 | 1.75E-02 | transcription_start_site | - | 154941 | 154941 | -1918 | 30167 | AN7919 |
| 2293 | CONTIG135 | 156230 | 157489 | 0.67 | 1.75E-02 | transcription_start_site | - | 154666 | 154666 | -2193 | 30168 | AN7919 |
| 2293 | CONTIG135 | 156230 | 157489 | 0.67 | 1.75E-02 | transcription_start_site | - | 153883 | 153883 | -2976 | 30169 | AN7919 |
| 2293 | CONTIG135 | 156230 | 157489 | 0.67 | 1.75E-02 | transcription_start_site | - | 153673 | 153673 | -3186 | 30170 | AN7919 |
| 2293 | CONTIG135 | 156230 | 157489 | 0.67 | 1.75E-02 | transcription_start_site | + | 155882 | 155882 | 977   | 30171 | AN7920 |
| 2262 | CONTIG135 | 159015 | 159969 | 0.72 | 1.08E-01 | transcription_start_site | + | 159614 | 159614 | -122  | 30172 | AN7921 |
| 2262 | CONTIG135 | 159015 | 159969 | 0.72 | 1.08E-01 | transcription_start_site | + | 161606 | 161606 | -2114 | 30173 | AN7921 |
| 2293 | CONTIG135 | 156230 | 157489 | 0.67 | 1.75E-02 | transcription_start_site | + | 159614 | 159614 | -2754 | 30172 | AN7921 |
| 2293 | CONTIG135 | 156230 | 157489 | 0.67 | 1.75E-02 | transcription_start_site | + | 161606 | 161606 | -4746 | 30173 | AN7921 |
| 2315 | CONTIG135 | 162830 | 163479 | 0.65 | 1.54E-01 | transcription_start_site | - | 162833 | 162833 | -321  | 30174 | AN7922 |
| 2315 | CONTIG135 | 162830 | 163479 | 0.65 | 1.54E-01 | transcription_start_site | - | 162421 | 162421 | -733  | 30175 | AN7922 |
| 2315 | CONTIG135 | 162830 | 163479 | 0.65 | 1.54E-01 | transcription_start_site | - | 162152 | 162152 | -1002 | 30176 | AN7922 |
| 2348 | CONTIG135 | 167251 | 167853 | 0.57 | 1.57E-01 | transcription_start_site | - | 162833 | 162833 | -4719 | 30174 | AN7922 |
| 2348 | CONTIG135 | 167251 | 167853 | 0.57 | 1.57E-01 | transcription_start_site | - | 162421 | 162421 | -5131 | 30175 | AN7922 |
| 2262 | CONTIG135 | 159015 | 159969 | 0.72 | 1.08E-01 | transcription_start_site | + | 163151 | 163151 | -3659 | 30177 | AN7923 |
| 2315 | CONTIG135 | 162830 | 163479 | 0.65 | 1.54E-01 | transcription_start_site | + | 163151 | 163151 | 3     | 30177 | AN7923 |
| 2262 | CONTIG135 | 159015 | 159969 | 0.72 | 1.08E-01 | transcription_start_site | + | 164756 | 164756 | -5264 | 30178 | AN7924 |
| 2315 | CONTIG135 | 162830 | 163479 | 0.65 | 1.54E-01 | transcription_start_site | + | 164756 | 164756 | -1601 | 30178 | AN7924 |
| 2315 | CONTIG135 | 162830 | 163479 | 0.65 | 1.54E-01 | transcription_start_site | + | 164984 | 164984 | -1829 | 30179 | AN7924 |
| 2348 | CONTIG135 | 167251 | 167853 | 0.57 | 1.57E-01 | transcription_start_site | - | 167297 | 167297 | -255  | 30180 | AN7925 |
| 2348 | CONTIG135 | 167251 | 167853 | 0.57 | 1.57E-01 | transcription_start_site | - | 167194 | 167194 | -358  | 30181 | AN7925 |
| 2348 | CONTIG135 | 167251 | 167853 | 0.57 | 1.57E-01 | transcription_start_site | - | 168217 | 168217 | 665   | 30183 | AN7926 |
| 2348 | CONTIG135 | 167251 | 167853 | 0.57 | 1.57E-01 | transcription_start_site | + | 169470 | 169470 | -1918 | 30184 | AN7927 |
| 2348 | CONTIG135 | 167251 | 167853 | 0.57 | 1.57E-01 | transcription_start_site | + | 169801 | 169801 | -2249 | 30185 | AN7927 |
| 2348 | CONTIG135 | 167251 | 167853 | 0.57 | 1.57E-01 | transcription_start_site | + | 170311 | 170311 | -2759 | 30186 | AN7927 |
| 1259 | CONTIG135 | 214205 | 214629 | 1.47 | 1.20E-03 | transcription_start_site | + | 214600 | 214600 | -183  | 30235 | AN7945 |
| 552  | CONTIG135 | 229426 | 230300 | 2.24 | 0.00E+00 | transcription_start_site | - | 227364 | 227364 | -2499 | 30247 | AN7949 |
| 552  | CONTIG135 | 229426 | 230300 | 2.24 | 0.00E+00 | transcription_start_site | - | 225021 | 225021 | -4842 | 30248 | AN7949 |
| 552  | CONTIG135 | 229426 | 230300 | 2.24 | 0.00E+00 | transcription_start_site | - | 229421 | 229421 | -442  | 30249 | AN7950 |
| 552  | CONTIG135 | 229426 | 230300 | 2.24 | 0.00E+00 | transcription_start_site | + | 230909 | 230909 | -1046 | 30250 | AN7951 |
| 552  | CONTIG135 | 229426 | 230300 | 2.24 | 0.00E+00 | transcription_start_site | + | 231102 | 231102 | -1239 | 30251 | AN7951 |
| 552  | CONTIG135 | 229426 | 230300 | 2.24 | 0.00E+00 | transcription_start_site | + | 232377 | 232377 | -2514 | 30252 | AN7951 |

|      |           |        |        |      |          |                          |   |        |        |       |       |        |
|------|-----------|--------|--------|------|----------|--------------------------|---|--------|--------|-------|-------|--------|
| 552  | CONTIG135 | 229426 | 230300 | 2.24 | 0.00E+00 | transcription_start_site | + | 232563 | 232563 | -2700 | 30253 | AN7951 |
| 2341 | CONTIG135 | 239631 | 239993 | 0.6  | 1.97E-01 | transcription_start_site | - | 236179 | 236179 | -3633 | 30254 | AN7952 |
| 2341 | CONTIG135 | 239631 | 239993 | 0.6  | 1.97E-01 | transcription_start_site | - | 236084 | 236084 | -3728 | 30255 | AN7952 |
| 2341 | CONTIG135 | 239631 | 239993 | 0.6  | 1.97E-01 | transcription_start_site | - | 238970 | 238970 | -842  | 30258 | AN7954 |
| 2341 | CONTIG135 | 239631 | 239993 | 0.6  | 1.97E-01 | transcription_start_site | - | 238510 | 238510 | -1302 | 30259 | AN7954 |
| 2341 | CONTIG135 | 239631 | 239993 | 0.6  | 1.97E-01 | transcription_start_site | - | 238310 | 238310 | -1502 | 30260 | AN7954 |
| 2341 | CONTIG135 | 239631 | 239993 | 0.6  | 1.97E-01 | transcription_start_site | - | 238019 | 238019 | -1793 | 30261 | AN7954 |
| 2341 | CONTIG135 | 239631 | 239993 | 0.6  | 1.97E-01 | transcription_start_site | + | 239667 | 239667 | 145   | 30263 | AN7955 |
| 2341 | CONTIG135 | 239631 | 239993 | 0.6  | 1.97E-01 | transcription_start_site | + | 239576 | 239576 | 236   | 30262 | AN7955 |
| 2341 | CONTIG135 | 239631 | 239993 | 0.6  | 1.97E-01 | transcription_start_site | + | 240101 | 240101 | -289  | 30264 | AN7955 |
| 2341 | CONTIG135 | 239631 | 239993 | 0.6  | 1.97E-01 | transcription_start_site | + | 240286 | 240286 | -474  | 30265 | AN7955 |
| 2341 | CONTIG135 | 239631 | 239993 | 0.6  | 1.97E-01 | transcription_start_site | + | 240430 | 240430 | -618  | 30266 | AN7955 |
| 2341 | CONTIG135 | 239631 | 239993 | 0.6  | 1.97E-01 | transcription_start_site | + | 240784 | 240784 | -972  | 30267 | AN7955 |
| 2341 | CONTIG135 | 239631 | 239993 | 0.6  | 1.97E-01 | transcription_start_site | + | 241044 | 241044 | -1232 | 30268 | AN7955 |
| 2341 | CONTIG135 | 239631 | 239993 | 0.6  | 1.97E-01 | transcription_start_site | + | 241486 | 241486 | -1674 | 30269 | AN7955 |
| 2341 | CONTIG135 | 239631 | 239993 | 0.6  | 1.97E-01 | transcription_start_site | + | 241653 | 241653 | -1841 | 30270 | AN7955 |
| 2341 | CONTIG135 | 239631 | 239993 | 0.6  | 1.97E-01 | transcription_start_site | + | 241796 | 241796 | -1984 | 30271 | AN7955 |
| 2341 | CONTIG135 | 239631 | 239993 | 0.6  | 1.97E-01 | transcription_start_site | + | 242029 | 242029 | -2217 | 30272 | AN7955 |
| 2160 | CONTIG135 | 290788 | 291202 | 0.82 | 6.74E-02 | transcription_start_site | - | 287828 | 287828 | -3167 | 30326 | AN7973 |
| 2160 | CONTIG135 | 290788 | 291202 | 0.82 | 6.74E-02 | transcription_start_site | - | 287643 | 287643 | -3352 | 30327 | AN7973 |
| 2160 | CONTIG135 | 290788 | 291202 | 0.82 | 6.74E-02 | transcription_start_site | - | 287452 | 287452 | -3543 | 30328 | AN7973 |
| 2160 | CONTIG135 | 290788 | 291202 | 0.82 | 6.74E-02 | transcription_start_site | - | 288816 | 288816 | -2179 | 30329 | AN7974 |
| 2160 | CONTIG135 | 290788 | 291202 | 0.82 | 6.74E-02 | transcription_start_site | - | 288775 | 288775 | -2220 | 30330 | AN7974 |
| 2160 | CONTIG135 | 290788 | 291202 | 0.82 | 6.74E-02 | transcription_start_site | - | 288404 | 288404 | -2591 | 30331 | AN7974 |
| 2160 | CONTIG135 | 290788 | 291202 | 0.82 | 6.74E-02 | transcription_start_site | + | 291789 | 291789 | -794  | 30332 | AN7975 |
| 1002 | CONTIG137 | 5551   | 5840   | 1.71 | 3.37E-03 | transcription_start_site | - | 5553   | 5553   | -142  | 30386 | AN7988 |
| 1002 | CONTIG137 | 5551   | 5840   | 1.71 | 3.37E-03 | transcription_start_site | - | 5330   | 5330   | -365  | 30387 | AN7988 |
| 1514 | CONTIG137 | 7366   | 8376   | 1.26 | 2.29E-02 | transcription_start_site | - | 5553   | 5553   | -2318 | 30386 | AN7988 |
| 1514 | CONTIG137 | 7366   | 8376   | 1.26 | 2.29E-02 | transcription_start_site | - | 5330   | 5330   | -2541 | 30387 | AN7988 |
| 1002 | CONTIG137 | 5551   | 5840   | 1.71 | 3.37E-03 | transcription_start_site | - | 6175   | 6175   | 479   | 30392 | AN7989 |
| 1002 | CONTIG137 | 5551   | 5840   | 1.71 | 3.37E-03 | transcription_start_site | - | 6775   | 6775   | 1079  | 30391 | AN7989 |
| 1514 | CONTIG137 | 7366   | 8376   | 1.26 | 2.29E-02 | transcription_start_site | - | 7176   | 7176   | -695  | 30388 | AN7989 |
| 1514 | CONTIG137 | 7366   | 8376   | 1.26 | 2.29E-02 | transcription_start_site | - | 7068   | 7068   | -803  | 30389 | AN7989 |
| 1514 | CONTIG137 | 7366   | 8376   | 1.26 | 2.29E-02 | transcription_start_site | - | 6975   | 6975   | -896  | 30390 | AN7989 |
| 1514 | CONTIG137 | 7366   | 8376   | 1.26 | 2.29E-02 | transcription_start_site | - | 6775   | 6775   | -1096 | 30391 | AN7989 |
| 1514 | CONTIG137 | 7366   | 8376   | 1.26 | 2.29E-02 | transcription_start_site | - | 6175   | 6175   | -1696 | 30392 | AN7989 |
| 1916 | CONTIG137 | 11796  | 12130  | 0.99 | 6.74E-02 | transcription_start_site | - | 7176   | 7176   | -4787 | 30388 | AN7989 |
| 1916 | CONTIG137 | 11796  | 12130  | 0.99 | 6.74E-02 | transcription_start_site | - | 7068   | 7068   | -4895 | 30389 | AN7989 |
| 1916 | CONTIG137 | 11796  | 12130  | 0.99 | 6.74E-02 | transcription_start_site | - | 6975   | 6975   | -4988 | 30390 | AN7989 |
| 1514 | CONTIG137 | 7366   | 8376   | 1.26 | 2.29E-02 | transcription_start_site | - | 7787   | 7787   | -84   | 30394 | AN7990 |
| 1514 | CONTIG137 | 7366   | 8376   | 1.26 | 2.29E-02 | transcription_start_site | - | 8005   | 8005   | 134   | 30393 | AN7990 |
| 1514 | CONTIG137 | 7366   | 8376   | 1.26 | 2.29E-02 | transcription_start_site | - | 7489   | 7489   | -382  | 30395 | AN7990 |
| 1916 | CONTIG137 | 11796  | 12130  | 0.99 | 6.74E-02 | transcription_start_site | - | 8005   | 8005   | -3958 | 30393 | AN7990 |
| 1916 | CONTIG137 | 11796  | 12130  | 0.99 | 6.74E-02 | transcription_start_site | - | 7787   | 7787   | -4176 | 30394 | AN7990 |
| 1916 | CONTIG137 | 11796  | 12130  | 0.99 | 6.74E-02 | transcription_start_site | - | 7489   | 7489   | -4474 | 30395 | AN7990 |
| 1002 | CONTIG137 | 5551   | 5840   | 1.71 | 3.37E-03 | transcription_start_site | + | 9578   | 9578   | -3882 | 30396 | AN7991 |
| 1002 | CONTIG137 | 5551   | 5840   | 1.71 | 3.37E-03 | transcription_start_site | + | 9856   | 9856   | -4160 | 30397 | AN7991 |
| 1002 | CONTIG137 | 5551   | 5840   | 1.71 | 3.37E-03 | transcription_start_site | + | 10100  | 10100  | -4404 | 30398 | AN7991 |
| 1514 | CONTIG137 | 7366   | 8376   | 1.26 | 2.29E-02 | transcription_start_site | + | 9578   | 9578   | -1707 | 30396 | AN7991 |
| 1514 | CONTIG137 | 7366   | 8376   | 1.26 | 2.29E-02 | transcription_start_site | + | 9856   | 9856   | -1985 | 30397 | AN7991 |
| 1514 | CONTIG137 | 7366   | 8376   | 1.26 | 2.29E-02 | transcription_start_site | + | 10100  | 10100  | -2229 | 30398 | AN7991 |
| 1514 | CONTIG137 | 7366   | 8376   | 1.26 | 2.29E-02 | transcription_start_site | + | 12092  | 12092  | -4221 | 30399 | AN7992 |
| 1916 | CONTIG137 | 11796  | 12130  | 0.99 | 6.74E-02 | transcription_start_site | + | 12092  | 12092  | -129  | 30399 | AN7992 |
| 1916 | CONTIG137 | 11796  | 12130  | 0.99 | 6.74E-02 | transcription_start_site | - | 12868  | 12868  | 905   | 30402 | AN7993 |
| 1916 | CONTIG137 | 11796  | 12130  | 0.99 | 6.74E-02 | transcription_start_site | + | 16448  | 16448  | -4485 | 30403 | AN7994 |
| 1916 | CONTIG137 | 11796  | 12130  | 0.99 | 6.74E-02 | transcription_start_site | + | 16634  | 16634  | -4671 | 30404 | AN7994 |
| 1916 | CONTIG137 | 11796  | 12130  | 0.99 | 6.74E-02 | transcription_start_site | + | 16817  | 16817  | -4854 | 30405 | AN7994 |

|      |           |       |       |      |          |                          |   |       |       |       |       |        |
|------|-----------|-------|-------|------|----------|--------------------------|---|-------|-------|-------|-------|--------|
| 425  | CONTIG138 | 14496 | 14988 | 2.42 | 2.32E-03 | transcription_start_site | - | 11514 | 11514 | -3228 | 30425 | AN8001 |
| 425  | CONTIG138 | 14496 | 14988 | 2.42 | 2.32E-03 | transcription_start_site | - | 11446 | 11446 | -3296 | 30426 | AN8001 |
| 584  | CONTIG138 | 13671 | 13925 | 2.21 | 5.08E-03 | transcription_start_site | - | 11514 | 11514 | -2284 | 30425 | AN8001 |
| 584  | CONTIG138 | 13671 | 13925 | 2.21 | 5.08E-03 | transcription_start_site | - | 11446 | 11446 | -2352 | 30426 | AN8001 |
| 425  | CONTIG138 | 14496 | 14988 | 2.42 | 2.32E-03 | transcription_start_site | + | 15372 | 15372 | -630  | 30429 | AN8003 |
| 584  | CONTIG138 | 13671 | 13925 | 2.21 | 5.08E-03 | transcription_start_site | + | 15372 | 15372 | -1574 | 30429 | AN8003 |
| 425  | CONTIG138 | 14496 | 14988 | 2.42 | 2.32E-03 | transcription_start_site | + | 19645 | 19645 | -4903 | 30430 | AN8004 |
| 852  | CONTIG138 | 19371 | 19720 | 1.88 | 1.37E-02 | transcription_start_site | + | 19645 | 19645 | -99   | 30430 | AN8004 |
| 1356 | CONTIG138 | 37296 | 37705 | 1.39 | 3.02E-02 | transcription_start_site | - | 32320 | 32320 | -5180 | 30438 | AN8008 |
| 1356 | CONTIG138 | 37296 | 37705 | 1.39 | 3.02E-02 | transcription_start_site | - | 33776 | 33776 | -3724 | 30439 | AN8009 |
| 1356 | CONTIG138 | 37296 | 37705 | 1.39 | 3.02E-02 | transcription_start_site | - | 33678 | 33678 | -3822 | 30440 | AN8009 |
| 1356 | CONTIG138 | 37296 | 37705 | 1.39 | 3.02E-02 | transcription_start_site | - | 33460 | 33460 | -4040 | 30441 | AN8009 |
| 1356 | CONTIG138 | 37296 | 37705 | 1.39 | 3.02E-02 | transcription_start_site | - | 36820 | 36820 | -680  | 30442 | AN8010 |
| 1356 | CONTIG138 | 37296 | 37705 | 1.39 | 3.02E-02 | transcription_start_site | - | 36316 | 36316 | -1184 | 30443 | AN8010 |
| 1356 | CONTIG138 | 37296 | 37705 | 1.39 | 3.02E-02 | transcription_start_site | - | 34902 | 34902 | -2598 | 30444 | AN8010 |
| 1356 | CONTIG138 | 37296 | 37705 | 1.39 | 3.02E-02 | transcription_start_site | - | 34658 | 34658 | -2842 | 30445 | AN8010 |
| 2328 | CONTIG139 | 8404  | 9065  | 0.62 | 1.67E-01 | transcription_start_site | - | 8522  | 8522  | -212  | 30454 | AN8014 |
| 2328 | CONTIG139 | 8404  | 9065  | 0.62 | 1.67E-01 | transcription_start_site | - | 7536  | 7536  | -1198 | 30455 | AN8014 |
| 2328 | CONTIG139 | 8404  | 9065  | 0.62 | 1.67E-01 | transcription_start_site | - | 5694  | 5694  | -3040 | 30456 | AN8014 |
| 2328 | CONTIG139 | 8404  | 9065  | 0.62 | 1.67E-01 | transcription_start_site | - | 9136  | 9136  | 401   | 30459 | AN8015 |
| 2328 | CONTIG139 | 8404  | 9065  | 0.62 | 1.67E-01 | transcription_start_site | + | 10947 | 10947 | -2212 | 30460 | AN8016 |
| 2328 | CONTIG139 | 8404  | 9065  | 0.62 | 1.67E-01 | transcription_start_site | + | 11031 | 11031 | -2296 | 30461 | AN8016 |
| 2328 | CONTIG139 | 8404  | 9065  | 0.62 | 1.67E-01 | transcription_start_site | + | 11332 | 11332 | -2597 | 30462 | AN8016 |
| 2328 | CONTIG139 | 8404  | 9065  | 0.62 | 1.67E-01 | transcription_start_site | + | 12286 | 12286 | -3551 | 30463 | AN8016 |
| 271  | CONTIG139 | 17264 | 17616 | 2.67 | 0.00E+00 | transcription_start_site | - | 16411 | 16411 | -1029 | 30464 | AN8017 |
| 271  | CONTIG139 | 17264 | 17616 | 2.67 | 0.00E+00 | transcription_start_site | - | 16002 | 16002 | -1438 | 30465 | AN8017 |
| 271  | CONTIG139 | 17264 | 17616 | 2.67 | 0.00E+00 | transcription_start_site | - | 15924 | 15924 | -1516 | 30466 | AN8017 |
| 271  | CONTIG139 | 17264 | 17616 | 2.67 | 0.00E+00 | transcription_start_site | - | 14901 | 14901 | -2539 | 30467 | AN8017 |
| 271  | CONTIG139 | 17264 | 17616 | 2.67 | 0.00E+00 | transcription_start_site | - | 14643 | 14643 | -2797 | 30468 | AN8017 |
| 271  | CONTIG139 | 17264 | 17616 | 2.67 | 0.00E+00 | transcription_start_site | - | 14297 | 14297 | -3143 | 30469 | AN8017 |
| 271  | CONTIG139 | 17264 | 17616 | 2.67 | 0.00E+00 | transcription_start_site | - | 13739 | 13739 | -3701 | 30470 | AN8017 |
| 271  | CONTIG139 | 17264 | 17616 | 2.67 | 0.00E+00 | transcription_start_site | - | 13566 | 13566 | -3874 | 30471 | AN8017 |
| 1539 | CONTIG139 | 19596 | 19856 | 1.24 | 3.70E-02 | transcription_start_site | - | 16411 | 16411 | -3315 | 30464 | AN8017 |
| 1539 | CONTIG139 | 19596 | 19856 | 1.24 | 3.70E-02 | transcription_start_site | - | 16002 | 16002 | -3724 | 30465 | AN8017 |
| 1539 | CONTIG139 | 19596 | 19856 | 1.24 | 3.70E-02 | transcription_start_site | - | 15924 | 15924 | -3802 | 30466 | AN8017 |
| 1539 | CONTIG139 | 19596 | 19856 | 1.24 | 3.70E-02 | transcription_start_site | - | 14901 | 14901 | -4825 | 30467 | AN8017 |
| 1539 | CONTIG139 | 19596 | 19856 | 1.24 | 3.70E-02 | transcription_start_site | - | 14643 | 14643 | -5083 | 30468 | AN8017 |
| 271  | CONTIG139 | 17264 | 17616 | 2.67 | 0.00E+00 | transcription_start_site | - | 18253 | 18253 | 813   | 30475 | AN8018 |
| 271  | CONTIG139 | 17264 | 17616 | 2.67 | 0.00E+00 | transcription_start_site | - | 18503 | 18503 | 1063  | 30474 | AN8018 |
| 1539 | CONTIG139 | 19596 | 19856 | 1.24 | 3.70E-02 | transcription_start_site | - | 19708 | 19708 | -18   | 30472 | AN8018 |
| 1539 | CONTIG139 | 19596 | 19856 | 1.24 | 3.70E-02 | transcription_start_site | - | 19429 | 19429 | -297  | 30473 | AN8018 |
| 1539 | CONTIG139 | 19596 | 19856 | 1.24 | 3.70E-02 | transcription_start_site | - | 18503 | 18503 | -1223 | 30474 | AN8018 |
| 1539 | CONTIG139 | 19596 | 19856 | 1.24 | 3.70E-02 | transcription_start_site | - | 18253 | 18253 | -1473 | 30475 | AN8018 |
| 271  | CONTIG139 | 17264 | 17616 | 2.67 | 0.00E+00 | transcription_start_site | + | 21083 | 21083 | -3643 | 30476 | AN8019 |
| 271  | CONTIG139 | 17264 | 17616 | 2.67 | 0.00E+00 | transcription_start_site | + | 22012 | 22012 | -4572 | 30477 | AN8019 |
| 1539 | CONTIG139 | 19596 | 19856 | 1.24 | 3.70E-02 | transcription_start_site | + | 21083 | 21083 | -1357 | 30476 | AN8019 |
| 1539 | CONTIG139 | 19596 | 19856 | 1.24 | 3.70E-02 | transcription_start_site | + | 22012 | 22012 | -2286 | 30477 | AN8019 |
| 1539 | CONTIG139 | 19596 | 19856 | 1.24 | 3.70E-02 | transcription_start_site | + | 23332 | 23332 | -3606 | 30478 | AN8019 |
| 1412 | CONTIG139 | 26642 | 26916 | 1.34 | 2.63E-02 | transcription_start_site | - | 26599 | 26599 | -180  | 30479 | AN8020 |
| 1412 | CONTIG139 | 26642 | 26916 | 1.34 | 2.63E-02 | transcription_start_site | - | 26197 | 26197 | -582  | 30480 | AN8020 |
| 1412 | CONTIG139 | 26642 | 26916 | 1.34 | 2.63E-02 | transcription_start_site | - | 26080 | 26080 | -699  | 30481 | AN8020 |
| 1412 | CONTIG139 | 26642 | 26916 | 1.34 | 2.63E-02 | transcription_start_site | - | 25339 | 25339 | -1440 | 30482 | AN8020 |
| 1412 | CONTIG139 | 26642 | 26916 | 1.34 | 2.63E-02 | transcription_start_site | + | 27729 | 27729 | -950  | 30483 | AN8021 |
| 1412 | CONTIG139 | 26642 | 26916 | 1.34 | 2.63E-02 | transcription_start_site | + | 27954 | 27954 | -1175 | 30484 | AN8021 |
| 1412 | CONTIG139 | 26642 | 26916 | 1.34 | 2.63E-02 | transcription_start_site | + | 28092 | 28092 | -1313 | 30485 | AN8021 |
| 1412 | CONTIG139 | 26642 | 26916 | 1.34 | 2.63E-02 | transcription_start_site | + | 28810 | 28810 | -2031 | 30486 | AN8021 |
| 1412 | CONTIG139 | 26642 | 26916 | 1.34 | 2.63E-02 | transcription_start_site | + | 29202 | 29202 | -2423 | 30487 | AN8021 |

|      |           |       |       |      |          |                          |   |       |       |       |       |        |
|------|-----------|-------|-------|------|----------|--------------------------|---|-------|-------|-------|-------|--------|
| 1412 | CONTIG139 | 26642 | 26916 | 1.34 | 2.63E-02 | transcription_start_site | + | 29548 | 29548 | -2769 | 30488 | AN8022 |
| 1412 | CONTIG139 | 26642 | 26916 | 1.34 | 2.63E-02 | transcription_start_site | + | 29755 | 29755 | -2976 | 30489 | AN8022 |
| 1412 | CONTIG139 | 26642 | 26916 | 1.34 | 2.63E-02 | transcription_start_site | + | 30293 | 30293 | -3514 | 30490 | AN8023 |
| 1412 | CONTIG139 | 26642 | 26916 | 1.34 | 2.63E-02 | transcription_start_site | + | 30385 | 30385 | -3606 | 30491 | AN8023 |
| 1412 | CONTIG139 | 26642 | 26916 | 1.34 | 2.63E-02 | transcription_start_site | + | 30533 | 30533 | -3754 | 30492 | AN8023 |
| 1412 | CONTIG139 | 26642 | 26916 | 1.34 | 2.63E-02 | transcription_start_site | + | 30704 | 30704 | -3925 | 30493 | AN8023 |
| 1412 | CONTIG139 | 26642 | 26916 | 1.34 | 2.63E-02 | transcription_start_site | + | 31493 | 31493 | -4714 | 30494 | AN8023 |
| 1653 | CONTIG139 | 43587 | 43941 | 1.17 | 4.78E-02 | transcription_start_site | - | 39026 | 39026 | -4738 | 30504 | AN8026 |
| 1653 | CONTIG139 | 43587 | 43941 | 1.17 | 4.78E-02 | transcription_start_site | - | 38873 | 38873 | -4891 | 30505 | AN8026 |
| 1653 | CONTIG139 | 43587 | 43941 | 1.17 | 4.78E-02 | transcription_start_site | - | 42543 | 42543 | -1221 | 30509 | AN8027 |
| 1653 | CONTIG139 | 43587 | 43941 | 1.17 | 4.78E-02 | transcription_start_site | - | 42016 | 42016 | -1748 | 30510 | AN8027 |
| 1653 | CONTIG139 | 43587 | 43941 | 1.17 | 4.78E-02 | transcription_start_site | - | 41737 | 41737 | -2027 | 30511 | AN8027 |
| 1852 | CONTIG139 | 45467 | 45733 | 1.04 | 7.66E-02 | transcription_start_site | - | 42543 | 42543 | -3057 | 30509 | AN8027 |
| 1852 | CONTIG139 | 45467 | 45733 | 1.04 | 7.66E-02 | transcription_start_site | - | 42016 | 42016 | -3584 | 30510 | AN8027 |
| 1852 | CONTIG139 | 45467 | 45733 | 1.04 | 7.66E-02 | transcription_start_site | - | 41737 | 41737 | -3863 | 30511 | AN8027 |
| 1653 | CONTIG139 | 43587 | 43941 | 1.17 | 4.78E-02 | transcription_start_site | + | 43872 | 43872 | -108  | 30512 | AN8028 |
| 1653 | CONTIG139 | 43587 | 43941 | 1.17 | 4.78E-02 | transcription_start_site | + | 44097 | 44097 | -333  | 30513 | AN8028 |
| 1653 | CONTIG139 | 43587 | 43941 | 1.17 | 4.78E-02 | transcription_start_site | + | 46375 | 46375 | -2611 | 30514 | AN8029 |
| 1852 | CONTIG139 | 45467 | 45733 | 1.04 | 7.66E-02 | transcription_start_site | + | 46375 | 46375 | -775  | 30514 | AN8029 |
| 1852 | CONTIG139 | 45467 | 45733 | 1.04 | 7.66E-02 | transcription_start_site | + | 49283 | 49283 | -3683 | 30515 | AN8030 |
| 1852 | CONTIG139 | 45467 | 45733 | 1.04 | 7.66E-02 | transcription_start_site | + | 49830 | 49830 | -4230 | 30516 | AN8030 |
| 2210 | CONTIG139 | 56630 | 58269 | 0.78 | 1.34E-01 | transcription_start_site | - | 54168 | 54168 | -3281 | 30517 | AN8031 |
| 153  | CONTIG139 | 59555 | 59919 | 2.94 | 0.00E+00 | transcription_start_site | - | 56562 | 56562 | -3175 | 30518 | AN8032 |
| 153  | CONTIG139 | 59555 | 59919 | 2.94 | 0.00E+00 | transcription_start_site | - | 56293 | 56293 | -3444 | 30519 | AN8032 |
| 153  | CONTIG139 | 59555 | 59919 | 2.94 | 0.00E+00 | transcription_start_site | - | 56211 | 56211 | -3526 | 30520 | AN8032 |
| 153  | CONTIG139 | 59555 | 59919 | 2.94 | 0.00E+00 | transcription_start_site | - | 55433 | 55433 | -4304 | 30521 | AN8032 |
| 810  | CONTIG139 | 61370 | 61639 | 1.92 | 2.32E-03 | transcription_start_site | - | 56562 | 56562 | -4942 | 30518 | AN8032 |
| 2210 | CONTIG139 | 56630 | 58269 | 0.78 | 1.34E-01 | transcription_start_site | - | 56562 | 56562 | -887  | 30518 | AN8032 |
| 2210 | CONTIG139 | 56630 | 58269 | 0.78 | 1.34E-01 | transcription_start_site | - | 56293 | 56293 | -1156 | 30519 | AN8032 |
| 2210 | CONTIG139 | 56630 | 58269 | 0.78 | 1.34E-01 | transcription_start_site | - | 56211 | 56211 | -1238 | 30520 | AN8032 |
| 2210 | CONTIG139 | 56630 | 58269 | 0.78 | 1.34E-01 | transcription_start_site | - | 55433 | 55433 | -2016 | 30521 | AN8032 |
| 153  | CONTIG139 | 59555 | 59919 | 2.94 | 0.00E+00 | transcription_start_site | + | 62790 | 62790 | -3053 | 30522 | AN8034 |
| 153  | CONTIG139 | 59555 | 59919 | 2.94 | 0.00E+00 | transcription_start_site | + | 64059 | 64059 | -4322 | 30523 | AN8034 |
| 810  | CONTIG139 | 61370 | 61639 | 1.92 | 2.32E-03 | transcription_start_site | + | 62790 | 62790 | -1285 | 30522 | AN8034 |
| 810  | CONTIG139 | 61370 | 61639 | 1.92 | 2.32E-03 | transcription_start_site | + | 64059 | 64059 | -2554 | 30523 | AN8034 |
| 1984 | CONTIG139 | 62560 | 62900 | 0.95 | 1.08E-01 | transcription_start_site | + | 62790 | 62790 | -60   | 30522 | AN8034 |
| 1984 | CONTIG139 | 62560 | 62900 | 0.95 | 1.08E-01 | transcription_start_site | + | 64059 | 64059 | -1329 | 30523 | AN8034 |
| 2210 | CONTIG139 | 56630 | 58269 | 0.78 | 1.34E-01 | transcription_start_site | + | 62790 | 62790 | -5340 | 30522 | AN8034 |
| 1407 | CONTIG139 | 70071 | 70480 | 1.34 | 1.30E-02 | transcription_start_site | - | 67909 | 67909 | -2366 | 30524 | AN8035 |
| 1407 | CONTIG139 | 70071 | 70480 | 1.34 | 1.30E-02 | transcription_start_site | - | 67385 | 67385 | -2890 | 30525 | AN8035 |
| 1407 | CONTIG139 | 70071 | 70480 | 1.34 | 1.30E-02 | transcription_start_site | - | 69831 | 69831 | -444  | 30526 | AN8036 |
| 1407 | CONTIG139 | 70071 | 70480 | 1.34 | 1.30E-02 | transcription_start_site | - | 69505 | 69505 | -770  | 30527 | AN8036 |
| 1407 | CONTIG139 | 70071 | 70480 | 1.34 | 1.30E-02 | transcription_start_site | + | 70758 | 70758 | -482  | 30528 | AN8037 |
| 1407 | CONTIG139 | 70071 | 70480 | 1.34 | 1.30E-02 | transcription_start_site | + | 70998 | 70998 | -722  | 30529 | AN8037 |
| 1407 | CONTIG139 | 70071 | 70480 | 1.34 | 1.30E-02 | transcription_start_site | + | 71094 | 71094 | -818  | 30530 | AN8037 |
| 1980 | CONTIG139 | 75315 | 75744 | 0.95 | 6.50E-02 | transcription_start_site | + | 76140 | 76140 | -610  | 30531 | AN8038 |
| 1980 | CONTIG139 | 75315 | 75744 | 0.95 | 6.50E-02 | transcription_start_site | + | 76542 | 76542 | -1012 | 30532 | AN8038 |
| 1980 | CONTIG139 | 75315 | 75744 | 0.95 | 6.50E-02 | transcription_start_site | + | 77134 | 77134 | -1604 | 30533 | AN8038 |
| 236  | CONTIG139 | 83326 | 83615 | 2.74 | 0.00E+00 | transcription_start_site | - | 80597 | 80597 | -2873 | 30534 | AN8039 |
| 236  | CONTIG139 | 83326 | 83615 | 2.74 | 0.00E+00 | transcription_start_site | - | 80258 | 80258 | -3212 | 30535 | AN8039 |
| 236  | CONTIG139 | 83326 | 83615 | 2.74 | 0.00E+00 | transcription_start_site | - | 80125 | 80125 | -3345 | 30536 | AN8039 |
| 236  | CONTIG139 | 83326 | 83615 | 2.74 | 0.00E+00 | transcription_start_site | + | 84034 | 84034 | -563  | 30540 | AN8041 |
| 236  | CONTIG139 | 83326 | 83615 | 2.74 | 0.00E+00 | transcription_start_site | + | 84110 | 84110 | -639  | 30541 | AN8041 |
| 236  | CONTIG139 | 83326 | 83615 | 2.74 | 0.00E+00 | transcription_start_site | + | 84202 | 84202 | -731  | 30542 | AN8041 |
| 236  | CONTIG139 | 83326 | 83615 | 2.74 | 0.00E+00 | transcription_start_site | + | 84325 | 84325 | -854  | 30543 | AN8041 |
| 236  | CONTIG139 | 83326 | 83615 | 2.74 | 0.00E+00 | transcription_start_site | + | 84447 | 84447 | -976  | 30544 | AN8041 |
| 236  | CONTIG139 | 83326 | 83615 | 2.74 | 0.00E+00 | transcription_start_site | + | 85186 | 85186 | -1715 | 30545 | AN8041 |



|      |           |        |        |      |          |                          |   |        |        |       |       |        |
|------|-----------|--------|--------|------|----------|--------------------------|---|--------|--------|-------|-------|--------|
| 236  | CONTIG139 | 83326  | 83615  | 2.74 | 0.00E+00 | transcription_start_site | + | 85409  | 85409  | -1938 | 30546 | AN8041 |
| 236  | CONTIG139 | 83326  | 83615  | 2.74 | 0.00E+00 | transcription_start_site | + | 86421  | 86421  | -2950 | 30547 | AN8042 |
| 236  | CONTIG139 | 83326  | 83615  | 2.74 | 0.00E+00 | transcription_start_site | + | 87101  | 87101  | -3630 | 30548 | AN8042 |
| 236  | CONTIG139 | 83326  | 83615  | 2.74 | 0.00E+00 | transcription_start_site | + | 87439  | 87439  | -3968 | 30549 | AN8042 |
| 236  | CONTIG139 | 83326  | 83615  | 2.74 | 0.00E+00 | transcription_start_site | + | 87507  | 87507  | -4036 | 30550 | AN8042 |
| 236  | CONTIG139 | 83326  | 83615  | 2.74 | 0.00E+00 | transcription_start_site | + | 87705  | 87705  | -4234 | 30551 | AN8042 |
| 236  | CONTIG139 | 83326  | 83615  | 2.74 | 0.00E+00 | transcription_start_site | + | 87869  | 87869  | -4398 | 30552 | AN8042 |
| 236  | CONTIG139 | 83326  | 83615  | 2.74 | 0.00E+00 | transcription_start_site | + | 88049  | 88049  | -4578 | 30553 | AN8042 |
| 236  | CONTIG139 | 83326  | 83615  | 2.74 | 0.00E+00 | transcription_start_site | + | 88309  | 88309  | -4838 | 30554 | AN8042 |
| 236  | CONTIG139 | 83326  | 83615  | 2.74 | 0.00E+00 | transcription_start_site | + | 88569  | 88569  | -5098 | 30555 | AN8042 |
| 1654 | CONTIG139 | 108091 | 108655 | 1.17 | 4.78E-02 | transcription_start_site | - | 105045 | 105045 | -3328 | 30572 | AN8048 |
| 1654 | CONTIG139 | 108091 | 108655 | 1.17 | 4.78E-02 | transcription_start_site | - | 104916 | 104916 | -3457 | 30573 | AN8048 |
| 1654 | CONTIG139 | 108091 | 108655 | 1.17 | 4.78E-02 | transcription_start_site | - | 104491 | 104491 | -3882 | 30574 | AN8048 |
| 1654 | CONTIG139 | 108091 | 108655 | 1.17 | 4.78E-02 | transcription_start_site | - | 106959 | 106959 | -1414 | 30578 | AN8050 |
| 1654 | CONTIG139 | 108091 | 108655 | 1.17 | 4.78E-02 | transcription_start_site | - | 106588 | 106588 | -1785 | 30579 | AN8050 |
| 1654 | CONTIG139 | 108091 | 108655 | 1.17 | 4.78E-02 | transcription_start_site | + | 108992 | 108992 | -619  | 30580 | AN8051 |
| 1943 | CONTIG139 | 146046 | 146385 | 0.98 | 9.60E-02 | transcription_start_site | - | 142710 | 142710 | -3505 | 30613 | AN8064 |
| 1943 | CONTIG139 | 146046 | 146385 | 0.98 | 9.60E-02 | transcription_start_site | - | 142517 | 142517 | -3698 | 30614 | AN8064 |
| 1943 | CONTIG139 | 146046 | 146385 | 0.98 | 9.60E-02 | transcription_start_site | - | 142380 | 142380 | -3835 | 30615 | AN8064 |
| 1943 | CONTIG139 | 146046 | 146385 | 0.98 | 9.60E-02 | transcription_start_site | - | 142153 | 142153 | -4062 | 30616 | AN8064 |
| 1943 | CONTIG139 | 146046 | 146385 | 0.98 | 9.60E-02 | transcription_start_site | - | 141711 | 141711 | -4504 | 30617 | AN8064 |
| 1943 | CONTIG139 | 146046 | 146385 | 0.98 | 9.60E-02 | transcription_start_site | - | 145904 | 145904 | -311  | 30624 | AN8066 |
| 1943 | CONTIG139 | 146046 | 146385 | 0.98 | 9.60E-02 | transcription_start_site | - | 145719 | 145719 | -496  | 30625 | AN8066 |
| 1943 | CONTIG139 | 146046 | 146385 | 0.98 | 9.60E-02 | transcription_start_site | + | 146697 | 146697 | -481  | 30626 | AN8067 |
| 1943 | CONTIG139 | 146046 | 146385 | 0.98 | 9.60E-02 | transcription_start_site | + | 147407 | 147407 | -1191 | 30627 | AN8067 |
| 1943 | CONTIG139 | 146046 | 146385 | 0.98 | 9.60E-02 | transcription_start_site | + | 148314 | 148314 | -2098 | 30628 | AN8067 |
| 1943 | CONTIG139 | 146046 | 146385 | 0.98 | 9.60E-02 | transcription_start_site | + | 150282 | 150282 | -4066 | 30629 | AN8068 |
| 1943 | CONTIG139 | 146046 | 146385 | 0.98 | 9.60E-02 | transcription_start_site | + | 150578 | 150578 | -4362 | 30630 | AN8068 |
| 1943 | CONTIG139 | 146046 | 146385 | 0.98 | 9.60E-02 | transcription_start_site | + | 150765 | 150765 | -4549 | 30631 | AN8068 |
| 1943 | CONTIG139 | 146046 | 146385 | 0.98 | 9.60E-02 | transcription_start_site | + | 151169 | 151169 | -4953 | 30632 | AN8068 |
| 1943 | CONTIG139 | 146046 | 146385 | 0.98 | 9.60E-02 | transcription_start_site | + | 151261 | 151261 | -5045 | 30633 | AN8068 |
| 492  | CONTIG139 | 173705 | 174054 | 2.32 | 0.00E+00 | transcription_start_site | - | 172974 | 172974 | -905  | 30651 | AN8074 |
| 492  | CONTIG139 | 173705 | 174054 | 2.32 | 0.00E+00 | transcription_start_site | - | 172537 | 172537 | -1342 | 30652 | AN8074 |
| 492  | CONTIG139 | 173705 | 174054 | 2.32 | 0.00E+00 | transcription_start_site | - | 170389 | 170389 | -3490 | 30653 | AN8074 |
| 639  | CONTIG139 | 175665 | 176088 | 2.12 | 7.06E-04 | transcription_start_site | - | 172974 | 172974 | -2902 | 30651 | AN8074 |
| 639  | CONTIG139 | 175665 | 176088 | 2.12 | 7.06E-04 | transcription_start_site | - | 172537 | 172537 | -3339 | 30652 | AN8074 |
| 492  | CONTIG139 | 173705 | 174054 | 2.32 | 0.00E+00 | transcription_start_site | - | 174150 | 174150 | 270   | 30657 | AN8075 |
| 492  | CONTIG139 | 173705 | 174054 | 2.32 | 0.00E+00 | transcription_start_site | - | 174319 | 174319 | 439   | 30656 | AN8075 |
| 639  | CONTIG139 | 175665 | 176088 | 2.12 | 7.06E-04 | transcription_start_site | - | 175445 | 175445 | -431  | 30654 | AN8075 |
| 639  | CONTIG139 | 175665 | 176088 | 2.12 | 7.06E-04 | transcription_start_site | - | 175163 | 175163 | -713  | 30655 | AN8075 |
| 639  | CONTIG139 | 175665 | 176088 | 2.12 | 7.06E-04 | transcription_start_site | - | 174319 | 174319 | -1557 | 30656 | AN8075 |
| 639  | CONTIG139 | 175665 | 176088 | 2.12 | 7.06E-04 | transcription_start_site | - | 174150 | 174150 | -1726 | 30657 | AN8075 |
| 492  | CONTIG139 | 173705 | 174054 | 2.32 | 0.00E+00 | transcription_start_site | + | 176869 | 176869 | -2989 | 30658 | AN8076 |
| 639  | CONTIG139 | 175665 | 176088 | 2.12 | 7.06E-04 | transcription_start_site | + | 176869 | 176869 | -992  | 30658 | AN8076 |
| 639  | CONTIG139 | 175665 | 176088 | 2.12 | 7.06E-04 | transcription_start_site | + | 180879 | 180879 | -5002 | 30659 | AN8076 |
| 1413 | CONTIG139 | 183451 | 184272 | 1.34 | 2.63E-02 | transcription_start_site | + | 184344 | 184344 | -482  | 30660 | AN8077 |
| 1413 | CONTIG139 | 183451 | 184272 | 1.34 | 2.63E-02 | transcription_start_site | + | 185029 | 185029 | -1167 | 30661 | AN8077 |
| 1413 | CONTIG139 | 183451 | 184272 | 1.34 | 2.63E-02 | transcription_start_site | + | 186701 | 186701 | -2839 | 30662 | AN8078 |
| 1413 | CONTIG139 | 183451 | 184272 | 1.34 | 2.63E-02 | transcription_start_site | + | 186985 | 186985 | -3123 | 30663 | AN8078 |
| 1413 | CONTIG139 | 183451 | 184272 | 1.34 | 2.63E-02 | transcription_start_site | + | 187675 | 187675 | -3813 | 30664 | AN8078 |
| 1413 | CONTIG139 | 183451 | 184272 | 1.34 | 2.63E-02 | transcription_start_site | + | 188051 | 188051 | -4189 | 30665 | AN8078 |
| 1413 | CONTIG139 | 183451 | 184272 | 1.34 | 2.63E-02 | transcription_start_site | + | 188810 | 188810 | -4948 | 30666 | AN8079 |
| 1413 | CONTIG139 | 183451 | 184272 | 1.34 | 2.63E-02 | transcription_start_site | + | 189049 | 189049 | -5187 | 30667 | AN8079 |
| 1413 | CONTIG139 | 183451 | 184272 | 1.34 | 2.63E-02 | transcription_start_site | + | 189184 | 189184 | -5322 | 30668 | AN8079 |
| 640  | CONTIG139 | 253746 | 254010 | 2.12 | 7.06E-04 | transcription_start_site | - | 253243 | 253243 | -635  | 30739 | AN8098 |
| 640  | CONTIG139 | 253746 | 254010 | 2.12 | 7.06E-04 | transcription_start_site | - | 253155 | 253155 | -723  | 30740 | AN8098 |
| 640  | CONTIG139 | 253746 | 254010 | 2.12 | 7.06E-04 | transcription_start_site | - | 252857 | 252857 | -1021 | 30741 | AN8098 |

|      |           |        |        |      |          |                          |   |        |        |       |       |        |
|------|-----------|--------|--------|------|----------|--------------------------|---|--------|--------|-------|-------|--------|
| 640  | CONTIG139 | 253746 | 254010 | 2.12 | 7.06E-04 | transcription_start_site | + | 255794 | 255794 | -1916 | 30742 | AN8099 |
| 640  | CONTIG139 | 253746 | 254010 | 2.12 | 7.06E-04 | transcription_start_site | + | 256148 | 256148 | -2270 | 30743 | AN8099 |
| 640  | CONTIG139 | 253746 | 254010 | 2.12 | 7.06E-04 | transcription_start_site | + | 256295 | 256295 | -2417 | 30744 | AN8099 |
| 640  | CONTIG139 | 253746 | 254010 | 2.12 | 7.06E-04 | transcription_start_site | + | 256543 | 256543 | -2665 | 30745 | AN8099 |
| 640  | CONTIG139 | 253746 | 254010 | 2.12 | 7.06E-04 | transcription_start_site | + | 256659 | 256659 | -2781 | 30746 | AN8099 |
| 640  | CONTIG139 | 253746 | 254010 | 2.12 | 7.06E-04 | transcription_start_site | + | 256857 | 256857 | -2979 | 30747 | AN8099 |
| 640  | CONTIG139 | 253746 | 254010 | 2.12 | 7.06E-04 | transcription_start_site | + | 257413 | 257413 | -3535 | 30748 | AN8099 |
| 1453 | CONTIG139 | 311709 | 312068 | 1.3  | 1.44E-02 | transcription_start_site | - | 310969 | 310969 | -919  | 30789 | AN8117 |
| 1453 | CONTIG139 | 311709 | 312068 | 1.3  | 1.44E-02 | transcription_start_site | - | 310517 | 310517 | -1371 | 30790 | AN8117 |
| 1453 | CONTIG139 | 311709 | 312068 | 1.3  | 1.44E-02 | transcription_start_site | - | 310175 | 310175 | -1713 | 30791 | AN8117 |
| 1453 | CONTIG139 | 311709 | 312068 | 1.3  | 1.44E-02 | transcription_start_site | + | 312260 | 312260 | -371  | 30792 | AN8118 |
| 1453 | CONTIG139 | 311709 | 312068 | 1.3  | 1.44E-02 | transcription_start_site | + | 312623 | 312623 | -734  | 30793 | AN8118 |
| 1453 | CONTIG139 | 311709 | 312068 | 1.3  | 1.44E-02 | transcription_start_site | + | 312755 | 312755 | -866  | 30794 | AN8118 |
| 1453 | CONTIG139 | 311709 | 312068 | 1.3  | 1.44E-02 | transcription_start_site | + | 312936 | 312936 | -1047 | 30795 | AN8118 |
| 1453 | CONTIG139 | 311709 | 312068 | 1.3  | 1.44E-02 | transcription_start_site | + | 315256 | 315256 | -3367 | 30800 | AN8120 |
| 1453 | CONTIG139 | 311709 | 312068 | 1.3  | 1.44E-02 | transcription_start_site | + | 315371 | 315371 | -3482 | 30801 | AN8120 |
| 432  | CONTIG139 | 322962 | 323376 | 2.41 | 0.00E+00 | transcription_start_site | - | 322522 | 322522 | -647  | 30802 | AN8121 |
| 432  | CONTIG139 | 322962 | 323376 | 2.41 | 0.00E+00 | transcription_start_site | + | 323973 | 323973 | -804  | 30803 | AN8122 |
| 432  | CONTIG139 | 322962 | 323376 | 2.41 | 0.00E+00 | transcription_start_site | + | 324426 | 324426 | -1257 | 30804 | AN8122 |
| 432  | CONTIG139 | 322962 | 323376 | 2.41 | 0.00E+00 | transcription_start_site | + | 325422 | 325422 | -2253 | 30805 | AN8122 |
| 895  | CONTIG139 | 329932 | 330291 | 1.83 | 1.53E-03 | transcription_start_site | - | 327486 | 327486 | -2625 | 30806 | AN8123 |
| 895  | CONTIG139 | 329932 | 330291 | 1.83 | 1.53E-03 | transcription_start_site | - | 327144 | 327144 | -2967 | 30807 | AN8123 |
| 895  | CONTIG139 | 329932 | 330291 | 1.83 | 1.53E-03 | transcription_start_site | - | 326922 | 326922 | -3189 | 30808 | AN8123 |
| 895  | CONTIG139 | 329932 | 330291 | 1.83 | 1.53E-03 | transcription_start_site | - | 326763 | 326763 | -3348 | 30809 | AN8123 |
| 895  | CONTIG139 | 329932 | 330291 | 1.83 | 1.53E-03 | transcription_start_site | - | 326529 | 326529 | -3582 | 30810 | AN8123 |
| 895  | CONTIG139 | 329932 | 330291 | 1.83 | 1.53E-03 | transcription_start_site | - | 326366 | 326366 | -3745 | 30811 | AN8123 |
| 432  | CONTIG139 | 322962 | 323376 | 2.41 | 0.00E+00 | transcription_start_site | + | 328125 | 328125 | -4956 | 30812 | AN8124 |
| 895  | CONTIG139 | 329932 | 330291 | 1.83 | 1.53E-03 | transcription_start_site | + | 329894 | 329894 | 217   | 30820 | AN8124 |
| 895  | CONTIG139 | 329932 | 330291 | 1.83 | 1.53E-03 | transcription_start_site | + | 329682 | 329682 | 429   | 30819 | AN8124 |
| 895  | CONTIG139 | 329932 | 330291 | 1.83 | 1.53E-03 | transcription_start_site | + | 329347 | 329347 | 764   | 30818 | AN8124 |
| 895  | CONTIG139 | 329932 | 330291 | 1.83 | 1.53E-03 | transcription_start_site | + | 329241 | 329241 | 870   | 30817 | AN8124 |
| 895  | CONTIG139 | 329932 | 330291 | 1.83 | 1.53E-03 | transcription_start_site | + | 328995 | 328995 | 1116  | 30816 | AN8124 |
| 895  | CONTIG139 | 329932 | 330291 | 1.83 | 1.53E-03 | transcription_start_site | + | 330563 | 330563 | -451  | 30821 | AN8125 |
| 895  | CONTIG139 | 329932 | 330291 | 1.83 | 1.53E-03 | transcription_start_site | + | 331530 | 331530 | -1418 | 30822 | AN8125 |
| 895  | CONTIG139 | 329932 | 330291 | 1.83 | 1.53E-03 | transcription_start_site | + | 331835 | 331835 | -1723 | 30823 | AN8125 |
| 895  | CONTIG139 | 329932 | 330291 | 1.83 | 1.53E-03 | transcription_start_site | + | 332015 | 332015 | -1903 | 30824 | AN8125 |
| 1059 | CONTIG139 | 345902 | 346261 | 1.66 | 7.70E-03 | transcription_start_site | - | 341712 | 341712 | -4369 | 30827 | AN8128 |
| 1059 | CONTIG139 | 345902 | 346261 | 1.66 | 7.70E-03 | transcription_start_site | - | 341135 | 341135 | -4946 | 30828 | AN8128 |
| 1059 | CONTIG139 | 345902 | 346261 | 1.66 | 7.70E-03 | transcription_start_site | - | 345721 | 345721 | -360  | 30829 | AN8129 |
| 1059 | CONTIG139 | 345902 | 346261 | 1.66 | 7.70E-03 | transcription_start_site | - | 344780 | 344780 | -1301 | 30830 | AN8129 |
| 1059 | CONTIG139 | 345902 | 346261 | 1.66 | 7.70E-03 | transcription_start_site | - | 343926 | 343926 | -2155 | 30831 | AN8129 |
| 1960 | CONTIG140 | 12989  | 13703  | 0.97 | 9.60E-02 | transcription_start_site | - | 9063   | 9063   | -4283 | 30842 | AN8133 |
| 1960 | CONTIG140 | 12989  | 13703  | 0.97 | 9.60E-02 | transcription_start_site | - | 8205   | 8205   | -5141 | 30843 | AN8133 |
| 1960 | CONTIG140 | 12989  | 13703  | 0.97 | 9.60E-02 | transcription_start_site | - | 8005   | 8005   | -5341 | 30844 | AN8133 |
| 1960 | CONTIG140 | 12989  | 13703  | 0.97 | 9.60E-02 | transcription_start_site | - | 12628  | 12628  | -718  | 30845 | AN8134 |
| 1960 | CONTIG140 | 12989  | 13703  | 0.97 | 9.60E-02 | transcription_start_site | - | 12513  | 12513  | -833  | 30846 | AN8134 |
| 1960 | CONTIG140 | 12989  | 13703  | 0.97 | 9.60E-02 | transcription_start_site | - | 12448  | 12448  | -898  | 30847 | AN8134 |
| 1960 | CONTIG140 | 12989  | 13703  | 0.97 | 9.60E-02 | transcription_start_site | - | 10870  | 10870  | -2476 | 30848 | AN8134 |
| 1960 | CONTIG140 | 12989  | 13703  | 0.97 | 9.60E-02 | transcription_start_site | - | 10501  | 10501  | -2845 | 30849 | AN8134 |
| 1960 | CONTIG140 | 12989  | 13703  | 0.97 | 9.60E-02 | transcription_start_site | + | 13454  | 13454  | -108  | 30850 | AN8135 |
| 1960 | CONTIG140 | 12989  | 13703  | 0.97 | 9.60E-02 | transcription_start_site | + | 13738  | 13738  | -392  | 30851 | AN8135 |
| 1960 | CONTIG140 | 12989  | 13703  | 0.97 | 9.60E-02 | transcription_start_site | + | 14139  | 14139  | -793  | 30852 | AN8135 |
| 886  | CONTIG140 | 19887  | 20236  | 1.84 | 3.37E-03 | transcription_start_site | - | 17636  | 17636  | -2425 | 30853 | AN8136 |
| 886  | CONTIG140 | 19887  | 20236  | 1.84 | 3.37E-03 | transcription_start_site | - | 17413  | 17413  | -2648 | 30854 | AN8136 |
| 886  | CONTIG140 | 19887  | 20236  | 1.84 | 3.37E-03 | transcription_start_site | + | 18888  | 18888  | 1173  | 30856 | AN8137 |
| 1960 | CONTIG140 | 12989  | 13703  | 0.97 | 9.60E-02 | transcription_start_site | + | 18050  | 18050  | -4704 | 30855 | AN8137 |
| 1599 | CONTIG140 | 25653  | 26238  | 1.2  | 9.64E-03 | transcription_start_site | - | 25570  | 25570  | -375  | 30857 | AN8138 |

|      |           |        |        |      |          |                          |   |        |        |       |       |        |
|------|-----------|--------|--------|------|----------|--------------------------|---|--------|--------|-------|-------|--------|
| 1599 | CONTIG140 | 25653  | 26238  | 1.2  | 9.64E-03 | transcription_start_site | - | 25400  | 25400  | -545  | 30858 | AN8138 |
| 1599 | CONTIG140 | 25653  | 26238  | 1.2  | 9.64E-03 | transcription_start_site | - | 24710  | 24710  | -1235 | 30859 | AN8138 |
| 1862 | CONTIG141 | 38717  | 39056  | 1.03 | 3.02E-02 | transcription_start_site | - | 36431  | 36431  | -2455 | 30896 | AN8150 |
| 1862 | CONTIG141 | 38717  | 39056  | 1.03 | 3.02E-02 | transcription_start_site | - | 35822  | 35822  | -3064 | 30897 | AN8150 |
| 1862 | CONTIG141 | 38717  | 39056  | 1.03 | 3.02E-02 | transcription_start_site | - | 35384  | 35384  | -3502 | 30898 | AN8150 |
| 1862 | CONTIG141 | 38717  | 39056  | 1.03 | 3.02E-02 | transcription_start_site | - | 35100  | 35100  | -3786 | 30899 | AN8150 |
| 1862 | CONTIG141 | 38717  | 39056  | 1.03 | 3.02E-02 | transcription_start_site | - | 34355  | 34355  | -4531 | 30900 | AN8150 |
| 1862 | CONTIG141 | 38717  | 39056  | 1.03 | 3.02E-02 | transcription_start_site | - | 34177  | 34177  | -4709 | 30901 | AN8150 |
| 1813 | CONTIG141 | 58502  | 58929  | 1.06 | 5.36E-02 | transcription_start_site | - | 58236  | 58236  | -479  | 30926 | AN8155 |
| 1813 | CONTIG141 | 58502  | 58929  | 1.06 | 5.36E-02 | transcription_start_site | - | 58117  | 58117  | -598  | 30927 | AN8155 |
| 1813 | CONTIG141 | 58502  | 58929  | 1.06 | 5.36E-02 | transcription_start_site | - | 57616  | 57616  | -1099 | 30928 | AN8155 |
| 1813 | CONTIG141 | 58502  | 58929  | 1.06 | 5.36E-02 | transcription_start_site | - | 57410  | 57410  | -1305 | 30929 | AN8155 |
| 1813 | CONTIG141 | 58502  | 58929  | 1.06 | 5.36E-02 | transcription_start_site | - | 57265  | 57265  | -1450 | 30930 | AN8155 |
| 2238 | CONTIG141 | 65552  | 65842  | 0.76 | 1.76E-01 | transcription_start_site | - | 65541  | 65541  | -156  | 30932 | AN8156 |
| 2238 | CONTIG141 | 65552  | 65842  | 0.76 | 1.76E-01 | transcription_start_site | - | 65322  | 65322  | -375  | 30933 | AN8156 |
| 2238 | CONTIG141 | 65552  | 65842  | 0.76 | 1.76E-01 | transcription_start_site | - | 66280  | 66280  | 583   | 30931 | AN8156 |
| 2238 | CONTIG141 | 65552  | 65842  | 0.76 | 1.76E-01 | transcription_start_site | - | 64980  | 64980  | -717  | 30934 | AN8156 |
| 2238 | CONTIG141 | 65552  | 65842  | 0.76 | 1.76E-01 | transcription_start_site | - | 64543  | 64543  | -1154 | 30935 | AN8156 |
| 2238 | CONTIG141 | 65552  | 65842  | 0.76 | 1.76E-01 | transcription_start_site | + | 70573  | 70573  | -4876 | 30939 | AN8158 |
| 2204 | CONTIG141 | 98253  | 98537  | 0.79 | 1.54E-01 | transcription_start_site | - | 94012  | 94012  | -4383 | 30967 | AN8162 |
| 2204 | CONTIG141 | 98253  | 98537  | 0.79 | 1.54E-01 | transcription_start_site | - | 98422  | 98422  | 27    | 30972 | AN8164 |
| 2204 | CONTIG141 | 98253  | 98537  | 0.79 | 1.54E-01 | transcription_start_site | - | 98295  | 98295  | -100  | 30973 | AN8164 |
| 2204 | CONTIG141 | 98253  | 98537  | 0.79 | 1.54E-01 | transcription_start_site | - | 98221  | 98221  | -174  | 30974 | AN8164 |
| 2204 | CONTIG141 | 98253  | 98537  | 0.79 | 1.54E-01 | transcription_start_site | - | 98029  | 98029  | -366  | 30975 | AN8164 |
| 2204 | CONTIG141 | 98253  | 98537  | 0.79 | 1.54E-01 | transcription_start_site | - | 97510  | 97510  | -885  | 30976 | AN8164 |
| 2204 | CONTIG141 | 98253  | 98537  | 0.79 | 1.54E-01 | transcription_start_site | - | 97162  | 97162  | -1233 | 30977 | AN8164 |
| 2204 | CONTIG141 | 98253  | 98537  | 0.79 | 1.54E-01 | transcription_start_site | - | 96870  | 96870  | -1525 | 30978 | AN8164 |
| 2204 | CONTIG141 | 98253  | 98537  | 0.79 | 1.54E-01 | transcription_start_site | - | 96687  | 96687  | -1708 | 30979 | AN8164 |
| 2204 | CONTIG141 | 98253  | 98537  | 0.79 | 1.54E-01 | transcription_start_site | + | 102201 | 102201 | -3806 | 30981 | AN8166 |
| 2204 | CONTIG141 | 98253  | 98537  | 0.79 | 1.54E-01 | transcription_start_site | + | 102261 | 102261 | -3866 | 30982 | AN8166 |
| 486  | CONTIG141 | 108017 | 108364 | 2.33 | 0.00E+00 | transcription_start_site | - | 106574 | 106574 | -1616 | 30983 | AN8167 |
| 486  | CONTIG141 | 108017 | 108364 | 2.33 | 0.00E+00 | transcription_start_site | - | 106345 | 106345 | -1845 | 30984 | AN8167 |
| 486  | CONTIG141 | 108017 | 108364 | 2.33 | 0.00E+00 | transcription_start_site | - | 106134 | 106134 | -2056 | 30985 | AN8167 |
| 363  | CONTIG141 | 114082 | 114441 | 2.51 | 0.00E+00 | transcription_start_site | - | 113279 | 113279 | -982  | 30986 | AN8168 |
| 363  | CONTIG141 | 114082 | 114441 | 2.51 | 0.00E+00 | transcription_start_site | - | 112567 | 112567 | -1694 | 30987 | AN8168 |
| 1901 | CONTIG141 | 117992 | 119609 | 1    | 3.61E-02 | transcription_start_site | - | 113279 | 113279 | -5521 | 30986 | AN8168 |
| 1901 | CONTIG141 | 117992 | 119609 | 1    | 3.61E-02 | transcription_start_site | - | 117782 | 117782 | -1018 | 30988 | AN8169 |
| 1901 | CONTIG141 | 117992 | 119609 | 1    | 3.61E-02 | transcription_start_site | - | 117145 | 117145 | -1655 | 30989 | AN8169 |
| 1901 | CONTIG141 | 117992 | 119609 | 1    | 3.61E-02 | transcription_start_site | - | 116746 | 116746 | -2054 | 30990 | AN8169 |
| 1901 | CONTIG141 | 117992 | 119609 | 1    | 3.61E-02 | transcription_start_site | - | 116274 | 116274 | -2526 | 30991 | AN8169 |
| 363  | CONTIG141 | 114082 | 114441 | 2.51 | 0.00E+00 | transcription_start_site | + | 119345 | 119345 | -5083 | 30992 | AN8170 |
| 1901 | CONTIG141 | 117992 | 119609 | 1    | 3.61E-02 | transcription_start_site | + | 119345 | 119345 | -544  | 30992 | AN8170 |
| 1901 | CONTIG141 | 117992 | 119609 | 1    | 3.61E-02 | transcription_start_site | + | 119593 | 119593 | -792  | 30993 | AN8170 |
| 1901 | CONTIG141 | 117992 | 119609 | 1    | 3.61E-02 | transcription_start_site | + | 120474 | 120474 | -1673 | 30994 | AN8170 |
| 1722 | CONTIG141 | 124427 | 124936 | 1.12 | 2.07E-02 | transcription_start_site | - | 124037 | 124037 | -644  | 30995 | AN8171 |
| 1722 | CONTIG141 | 124427 | 124936 | 1.12 | 2.07E-02 | transcription_start_site | - | 123518 | 123518 | -1163 | 30996 | AN8171 |
| 1722 | CONTIG141 | 124427 | 124936 | 1.12 | 2.07E-02 | transcription_start_site | - | 121866 | 121866 | -2815 | 30997 | AN8171 |
| 1722 | CONTIG141 | 124427 | 124936 | 1.12 | 2.07E-02 | transcription_start_site | - | 121525 | 121525 | -3156 | 30998 | AN8171 |
| 1722 | CONTIG141 | 124427 | 124936 | 1.12 | 2.07E-02 | transcription_start_site | - | 120728 | 120728 | -3953 | 30999 | AN8171 |
| 1722 | CONTIG141 | 124427 | 124936 | 1.12 | 2.07E-02 | transcription_start_site | + | 124894 | 124894 | -212  | 31000 | AN8172 |
| 1722 | CONTIG141 | 124427 | 124936 | 1.12 | 2.07E-02 | transcription_start_site | + | 125080 | 125080 | -398  | 31001 | AN8172 |
| 1722 | CONTIG141 | 124427 | 124936 | 1.12 | 2.07E-02 | transcription_start_site | + | 125700 | 125700 | -1018 | 31002 | AN8172 |
| 1722 | CONTIG141 | 124427 | 124936 | 1.12 | 2.07E-02 | transcription_start_site | + | 127220 | 127220 | -2538 | 31003 | AN8173 |
| 1043 | CONTIG141 | 132452 | 132726 | 1.67 | 4.57E-03 | transcription_start_site | - | 131798 | 131798 | -791  | 31004 | AN8174 |
| 1043 | CONTIG141 | 132452 | 132726 | 1.67 | 4.57E-03 | transcription_start_site | - | 131633 | 131633 | -956  | 31005 | AN8174 |
| 1043 | CONTIG141 | 132452 | 132726 | 1.67 | 4.57E-03 | transcription_start_site | - | 131136 | 131136 | -1453 | 31006 | AN8174 |
| 1043 | CONTIG141 | 132452 | 132726 | 1.67 | 4.57E-03 | transcription_start_site | - | 130984 | 130984 | -1605 | 31007 | AN8174 |

|      |           |        |        |      |          |                          |   |        |        |       |       |        |
|------|-----------|--------|--------|------|----------|--------------------------|---|--------|--------|-------|-------|--------|
| 1043 | CONTIG141 | 132452 | 132726 | 1.67 | 4.57E-03 | transcription_start_site | - | 130279 | 130279 | -2310 | 31008 | AN8174 |
| 1247 | CONTIG141 | 132832 | 133786 | 1.48 | 9.96E-03 | transcription_start_site | - | 131798 | 131798 | -1511 | 31004 | AN8174 |
| 1247 | CONTIG141 | 132832 | 133786 | 1.48 | 9.96E-03 | transcription_start_site | - | 131633 | 131633 | -1676 | 31005 | AN8174 |
| 1247 | CONTIG141 | 132832 | 133786 | 1.48 | 9.96E-03 | transcription_start_site | - | 131136 | 131136 | -2173 | 31006 | AN8174 |
| 1247 | CONTIG141 | 132832 | 133786 | 1.48 | 9.96E-03 | transcription_start_site | - | 130984 | 130984 | -2325 | 31007 | AN8174 |
| 1247 | CONTIG141 | 132832 | 133786 | 1.48 | 9.96E-03 | transcription_start_site | - | 130279 | 130279 | -3030 | 31008 | AN8174 |
| 1043 | CONTIG141 | 132452 | 132726 | 1.67 | 4.57E-03 | transcription_start_site | + | 134223 | 134223 | -1634 | 31009 | AN8175 |
| 1247 | CONTIG141 | 132832 | 133786 | 1.48 | 9.96E-03 | transcription_start_site | + | 134223 | 134223 | -914  | 31009 | AN8175 |
| 2172 | CONTIG141 | 139442 | 139926 | 0.82 | 1.38E-01 | transcription_start_site | + | 139730 | 139730 | -46   | 31012 | AN8176 |
| 2172 | CONTIG141 | 139442 | 139926 | 0.82 | 1.38E-01 | transcription_start_site | + | 139570 | 139570 | 114   | 31011 | AN8176 |
| 2172 | CONTIG141 | 139442 | 139926 | 0.82 | 1.38E-01 | transcription_start_site | + | 139337 | 139337 | 347   | 31010 | AN8176 |
| 1093 | CONTIG141 | 159917 | 160251 | 1.61 | 2.49E-03 | transcription_start_site | + | 161421 | 161421 | -1337 | 31027 | AN8181 |
| 1093 | CONTIG141 | 159917 | 160251 | 1.61 | 2.49E-03 | transcription_start_site | + | 161601 | 161601 | -1517 | 31028 | AN8181 |
| 1093 | CONTIG141 | 159917 | 160251 | 1.61 | 2.49E-03 | transcription_start_site | + | 162049 | 162049 | -1965 | 31029 | AN8181 |
| 1673 | CONTIG141 | 159307 | 159801 | 1.15 | 3.70E-02 | transcription_start_site | + | 161421 | 161421 | -1867 | 31027 | AN8181 |
| 1673 | CONTIG141 | 159307 | 159801 | 1.15 | 3.70E-02 | transcription_start_site | + | 161601 | 161601 | -2047 | 31028 | AN8181 |
| 1673 | CONTIG141 | 159307 | 159801 | 1.15 | 3.70E-02 | transcription_start_site | + | 162049 | 162049 | -2495 | 31029 | AN8181 |
| 1814 | CONTIG141 | 184207 | 184476 | 1.06 | 5.36E-02 | transcription_start_site | + | 183699 | 183699 | 642   | 31055 | AN8187 |
| 1814 | CONTIG141 | 184207 | 184476 | 1.06 | 5.36E-02 | transcription_start_site | + | 184490 | 184490 | -148  | 31056 | AN8188 |
| 1814 | CONTIG141 | 184207 | 184476 | 1.06 | 5.36E-02 | transcription_start_site | + | 184793 | 184793 | -451  | 31057 | AN8188 |
| 1814 | CONTIG141 | 184207 | 184476 | 1.06 | 5.36E-02 | transcription_start_site | + | 184982 | 184982 | -640  | 31058 | AN8188 |
| 1814 | CONTIG141 | 184207 | 184476 | 1.06 | 5.36E-02 | transcription_start_site | + | 185337 | 185337 | -995  | 31059 | AN8188 |
| 1814 | CONTIG141 | 184207 | 184476 | 1.06 | 5.36E-02 | transcription_start_site | + | 186616 | 186616 | -2274 | 31060 | AN8189 |
| 2233 | CONTIG141 | 190887 | 191466 | 0.76 | 1.15E-01 | transcription_start_site | + | 191057 | 191057 | 119   | 31061 | AN8190 |
| 2233 | CONTIG141 | 190887 | 191466 | 0.76 | 1.15E-01 | transcription_start_site | + | 192310 | 192310 | -1133 | 31062 | AN8190 |
| 2233 | CONTIG141 | 190887 | 191466 | 0.76 | 1.15E-01 | transcription_start_site | + | 194221 | 194221 | -3044 | 31063 | AN8190 |
| 2233 | CONTIG141 | 190887 | 191466 | 0.76 | 1.15E-01 | transcription_start_site | + | 195800 | 195800 | -4623 | 31064 | AN8191 |
| 2233 | CONTIG141 | 190887 | 191466 | 0.76 | 1.15E-01 | transcription_start_site | + | 195914 | 195914 | -4737 | 31065 | AN8191 |
| 193  | CONTIG142 | 8195   | 8684   | 2.83 | 0.00E+00 | transcription_start_site | + | 9257   | 9257   | -817  | 31080 | AN8195 |
| 193  | CONTIG142 | 8195   | 8684   | 2.83 | 0.00E+00 | transcription_start_site | + | 11279  | 11279  | -2839 | 31081 | AN8196 |
| 193  | CONTIG142 | 8195   | 8684   | 2.83 | 0.00E+00 | transcription_start_site | + | 11781  | 11781  | -3341 | 31082 | AN8196 |
| 193  | CONTIG142 | 8195   | 8684   | 2.83 | 0.00E+00 | transcription_start_site | + | 11950  | 11950  | -3510 | 31083 | AN8196 |
| 1391 | CONTIG142 | 19581  | 19940  | 1.36 | 3.70E-02 | transcription_start_site | - | 18517  | 18517  | -1243 | 31086 | AN8198 |
| 1391 | CONTIG142 | 19581  | 19940  | 1.36 | 3.70E-02 | transcription_start_site | - | 18167  | 18167  | -1593 | 31087 | AN8198 |
| 1391 | CONTIG142 | 19581  | 19940  | 1.36 | 3.70E-02 | transcription_start_site | - | 17679  | 17679  | -2081 | 31088 | AN8198 |
| 1391 | CONTIG142 | 19581  | 19940  | 1.36 | 3.70E-02 | transcription_start_site | - | 17410  | 17410  | -2350 | 31089 | AN8198 |
| 1391 | CONTIG142 | 19581  | 19940  | 1.36 | 3.70E-02 | transcription_start_site | - | 17149  | 17149  | -2611 | 31090 | AN8198 |
| 1391 | CONTIG142 | 19581  | 19940  | 1.36 | 3.70E-02 | transcription_start_site | - | 17036  | 17036  | -2724 | 31091 | AN8198 |
| 1391 | CONTIG142 | 19581  | 19940  | 1.36 | 3.70E-02 | transcription_start_site | - | 16903  | 16903  | -2857 | 31092 | AN8198 |
| 1391 | CONTIG142 | 19581  | 19940  | 1.36 | 3.70E-02 | transcription_start_site | - | 16340  | 16340  | -3420 | 31093 | AN8198 |
| 1391 | CONTIG142 | 19581  | 19940  | 1.36 | 3.70E-02 | transcription_start_site | - | 16131  | 16131  | -3629 | 31094 | AN8198 |
| 1391 | CONTIG142 | 19581  | 19940  | 1.36 | 3.70E-02 | transcription_start_site | + | 20259  | 20259  | -498  | 31095 | AN8199 |
| 1391 | CONTIG142 | 19581  | 19940  | 1.36 | 3.70E-02 | transcription_start_site | + | 20469  | 20469  | -708  | 31096 | AN8199 |
| 1391 | CONTIG142 | 19581  | 19940  | 1.36 | 3.70E-02 | transcription_start_site | + | 21037  | 21037  | -1276 | 31097 | AN8199 |
| 1391 | CONTIG142 | 19581  | 19940  | 1.36 | 3.70E-02 | transcription_start_site | + | 21505  | 21505  | -1744 | 31098 | AN8199 |
| 2353 | CONTIG142 | 24621  | 25567  | 0.54 | 1.75E-01 | transcription_start_site | - | 26149  | 26149  | 1055  | 31101 | AN8200 |
| 2353 | CONTIG142 | 24621  | 25567  | 0.54 | 1.75E-01 | transcription_start_site | - | 26259  | 26259  | 1165  | 31100 | AN8200 |
| 2353 | CONTIG142 | 24621  | 25567  | 0.54 | 1.75E-01 | transcription_start_site | - | 26316  | 26316  | 1222  | 31099 | AN8200 |
| 2353 | CONTIG142 | 24621  | 25567  | 0.54 | 1.75E-01 | transcription_start_site | + | 26746  | 26746  | -1652 | 31102 | AN8201 |
| 2353 | CONTIG142 | 24621  | 25567  | 0.54 | 1.75E-01 | transcription_start_site | + | 26821  | 26821  | -1727 | 31103 | AN8201 |
| 2353 | CONTIG142 | 24621  | 25567  | 0.54 | 1.75E-01 | transcription_start_site | + | 26983  | 26983  | -1889 | 31104 | AN8201 |
| 2353 | CONTIG142 | 24621  | 25567  | 0.54 | 1.75E-01 | transcription_start_site | + | 29669  | 29669  | -4575 | 31105 | AN8202 |
| 54   | CONTIG143 | 14626  | 14975  | 3.23 | 1.45E-03 | transcription_start_site | - | 12734  | 12734  | -2066 | 31133 | AN8209 |
| 54   | CONTIG143 | 14626  | 14975  | 3.23 | 1.45E-03 | transcription_start_site | - | 12389  | 12389  | -2411 | 31134 | AN8209 |
| 54   | CONTIG143 | 14626  | 14975  | 3.23 | 1.45E-03 | transcription_start_site | - | 12048  | 12048  | -2752 | 31135 | AN8209 |
| 400  | CONTIG143 | 13216  | 13795  | 2.45 | 1.25E-02 | transcription_start_site | - | 12734  | 12734  | -771  | 31133 | AN8209 |
| 400  | CONTIG143 | 13216  | 13795  | 2.45 | 1.25E-02 | transcription_start_site | - | 12389  | 12389  | -1116 | 31134 | AN8209 |

|      |           |        |        |      |          |                          |   |        |        |       |       |        |
|------|-----------|--------|--------|------|----------|--------------------------|---|--------|--------|-------|-------|--------|
| 400  | CONTIG143 | 13216  | 13795  | 2.45 | 1.25E-02 | transcription_start_site | - | 12048  | 12048  | -1457 | 31135 | AN8209 |
| 400  | CONTIG143 | 13216  | 13795  | 2.45 | 1.25E-02 | transcription_start_site | - | 8569   | 8569   | -4936 | 31136 | AN8209 |
| 54   | CONTIG143 | 14626  | 14975  | 3.23 | 1.45E-03 | transcription_start_site | + | 15450  | 15450  | -649  | 31138 | AN8210 |
| 400  | CONTIG143 | 13216  | 13795  | 2.45 | 1.25E-02 | transcription_start_site | + | 15450  | 15450  | -1944 | 31138 | AN8210 |
| 252  | CONTIG144 | 23259  | 23678  | 2.7  | 0.00E+00 | transcription_start_site | - | 20611  | 20611  | -2857 | 31164 | AN8219 |
| 252  | CONTIG144 | 23259  | 23678  | 2.7  | 0.00E+00 | transcription_start_site | - | 19536  | 19536  | -3932 | 31165 | AN8219 |
| 252  | CONTIG144 | 23259  | 23678  | 2.7  | 0.00E+00 | transcription_start_site | + | 25254  | 25254  | -1785 | 31166 | AN8220 |
| 252  | CONTIG144 | 23259  | 23678  | 2.7  | 0.00E+00 | transcription_start_site | + | 26046  | 26046  | -2577 | 31167 | AN8220 |
| 252  | CONTIG144 | 23259  | 23678  | 2.7  | 0.00E+00 | transcription_start_site | + | 27065  | 27065  | -3596 | 31168 | AN8221 |
| 252  | CONTIG144 | 23259  | 23678  | 2.7  | 0.00E+00 | transcription_start_site | + | 27514  | 27514  | -4045 | 31169 | AN8221 |
| 252  | CONTIG144 | 23259  | 23678  | 2.7  | 0.00E+00 | transcription_start_site | + | 28015  | 28015  | -4546 | 31170 | AN8221 |
| 1959 | CONTIG144 | 40069  | 40558  | 0.97 | 7.66E-02 | transcription_start_site | - | 37054  | 37054  | -3259 | 31182 | AN8226 |
| 1959 | CONTIG144 | 40069  | 40558  | 0.97 | 7.66E-02 | transcription_start_site | - | 36958  | 36958  | -3355 | 31183 | AN8226 |
| 1959 | CONTIG144 | 40069  | 40558  | 0.97 | 7.66E-02 | transcription_start_site | - | 36223  | 36223  | -4090 | 31184 | AN8226 |
| 1959 | CONTIG144 | 40069  | 40558  | 0.97 | 7.66E-02 | transcription_start_site | + | 43147  | 43147  | -2833 | 31187 | AN8229 |
| 1959 | CONTIG144 | 40069  | 40558  | 0.97 | 7.66E-02 | transcription_start_site | + | 43267  | 43267  | -2953 | 31188 | AN8229 |
| 1959 | CONTIG144 | 40069  | 40558  | 0.97 | 7.66E-02 | transcription_start_site | + | 44055  | 44055  | -3741 | 31189 | AN8229 |
| 85   | CONTIG145 | 39981  | 40552  | 3.12 | 0.00E+00 | transcription_start_site | - | 39722  | 39722  | -544  | 31229 | AN8251 |
| 223  | CONTIG145 | 75694  | 76403  | 2.78 | 0.00E+00 | transcription_start_site | + | 76385  | 76385  | -336  | 31255 | AN8262 |
| 223  | CONTIG145 | 75694  | 76403  | 2.78 | 0.00E+00 | transcription_start_site | + | 76694  | 76694  | -645  | 31256 | AN8262 |
| 223  | CONTIG145 | 75694  | 76403  | 2.78 | 0.00E+00 | transcription_start_site | + | 76942  | 76942  | -893  | 31257 | AN8262 |
| 223  | CONTIG145 | 75694  | 76403  | 2.78 | 0.00E+00 | transcription_start_site | + | 77490  | 77490  | -1441 | 31258 | AN8262 |
| 223  | CONTIG145 | 75694  | 76403  | 2.78 | 0.00E+00 | transcription_start_site | + | 78010  | 78010  | -1961 | 31259 | AN8263 |
| 1205 | CONTIG145 | 88734  | 89163  | 1.52 | 3.01E-02 | transcription_start_site | - | 84420  | 84420  | -4528 | 31262 | AN8265 |
| 1205 | CONTIG145 | 88734  | 89163  | 1.52 | 3.01E-02 | transcription_start_site | - | 84078  | 84078  | -4870 | 31263 | AN8265 |
| 1205 | CONTIG145 | 88734  | 89163  | 1.52 | 3.01E-02 | transcription_start_site | - | 83922  | 83922  | -5026 | 31264 | AN8265 |
| 1205 | CONTIG145 | 88734  | 89163  | 1.52 | 3.01E-02 | transcription_start_site | - | 83804  | 83804  | -5144 | 31265 | AN8265 |
| 1205 | CONTIG145 | 88734  | 89163  | 1.52 | 3.01E-02 | transcription_start_site | - | 87978  | 87978  | -970  | 31268 | AN8266 |
| 1922 | CONTIG145 | 90379  | 90808  | 0.99 | 9.90E-02 | transcription_start_site | - | 87978  | 87978  | -2615 | 31268 | AN8266 |
| 1205 | CONTIG145 | 88734  | 89163  | 1.52 | 3.01E-02 | transcription_start_site | + | 89805  | 89805  | -856  | 31269 | AN8267 |
| 1205 | CONTIG145 | 88734  | 89163  | 1.52 | 3.01E-02 | transcription_start_site | + | 89916  | 89916  | -967  | 31270 | AN8267 |
| 1922 | CONTIG145 | 90379  | 90808  | 0.99 | 9.90E-02 | transcription_start_site | + | 89916  | 89916  | 677   | 31270 | AN8267 |
| 1922 | CONTIG145 | 90379  | 90808  | 0.99 | 9.90E-02 | transcription_start_site | + | 89805  | 89805  | 788   | 31269 | AN8267 |
| 1205 | CONTIG145 | 88734  | 89163  | 1.52 | 3.01E-02 | transcription_start_site | + | 91385  | 91385  | -2436 | 31271 | AN8268 |
| 1205 | CONTIG145 | 88734  | 89163  | 1.52 | 3.01E-02 | transcription_start_site | + | 91758  | 91758  | -2809 | 31272 | AN8268 |
| 1205 | CONTIG145 | 88734  | 89163  | 1.52 | 3.01E-02 | transcription_start_site | + | 92789  | 92789  | -3840 | 31273 | AN8268 |
| 1922 | CONTIG145 | 90379  | 90808  | 0.99 | 9.90E-02 | transcription_start_site | + | 91385  | 91385  | -791  | 31271 | AN8268 |
| 1922 | CONTIG145 | 90379  | 90808  | 0.99 | 9.90E-02 | transcription_start_site | + | 91758  | 91758  | -1164 | 31272 | AN8268 |
| 1922 | CONTIG145 | 90379  | 90808  | 0.99 | 9.90E-02 | transcription_start_site | + | 92789  | 92789  | -2195 | 31273 | AN8268 |
| 1922 | CONTIG145 | 90379  | 90808  | 0.99 | 9.90E-02 | transcription_start_site | + | 94836  | 94836  | -4242 | 31274 | AN8269 |
| 1922 | CONTIG145 | 90379  | 90808  | 0.99 | 9.90E-02 | transcription_start_site | + | 95153  | 95153  | -4559 | 31275 | AN8269 |
| 546  | CONTIG145 | 101103 | 101617 | 2.25 | 1.20E-03 | transcription_start_site | - | 100378 | 100378 | -982  | 31276 | AN8270 |
| 546  | CONTIG145 | 101103 | 101617 | 2.25 | 1.20E-03 | transcription_start_site | - | 99383  | 99383  | -1977 | 31277 | AN8270 |
| 546  | CONTIG145 | 101103 | 101617 | 2.25 | 1.20E-03 | transcription_start_site | - | 99080  | 99080  | -2280 | 31278 | AN8270 |
| 546  | CONTIG145 | 101103 | 101617 | 2.25 | 1.20E-03 | transcription_start_site | + | 102406 | 102406 | -1046 | 31279 | AN8271 |
| 546  | CONTIG145 | 101103 | 101617 | 2.25 | 1.20E-03 | transcription_start_site | + | 103027 | 103027 | -1667 | 31280 | AN8271 |
| 468  | CONTIG145 | 112068 | 112327 | 2.36 | 1.45E-03 | transcription_start_site | - | 107253 | 107253 | -4944 | 31281 | AN8272 |
| 468  | CONTIG145 | 112068 | 112327 | 2.36 | 1.45E-03 | transcription_start_site | - | 107177 | 107177 | -5020 | 31282 | AN8272 |
| 468  | CONTIG145 | 112068 | 112327 | 2.36 | 1.45E-03 | transcription_start_site | - | 111814 | 111814 | -383  | 31289 | AN8274 |
| 468  | CONTIG145 | 112068 | 112327 | 2.36 | 1.45E-03 | transcription_start_site | - | 111683 | 111683 | -514  | 31290 | AN8274 |
| 468  | CONTIG145 | 112068 | 112327 | 2.36 | 1.45E-03 | transcription_start_site | - | 111607 | 111607 | -590  | 31291 | AN8274 |
| 468  | CONTIG145 | 112068 | 112327 | 2.36 | 1.45E-03 | transcription_start_site | - | 111534 | 111534 | -663  | 31292 | AN8274 |
| 468  | CONTIG145 | 112068 | 112327 | 2.36 | 1.45E-03 | transcription_start_site | - | 111350 | 111350 | -847  | 31293 | AN8274 |
| 468  | CONTIG145 | 112068 | 112327 | 2.36 | 1.45E-03 | transcription_start_site | - | 110547 | 110547 | -1650 | 31294 | AN8274 |
| 1040 | CONTIG145 | 115063 | 115402 | 1.68 | 1.80E-02 | transcription_start_site | - | 111814 | 111814 | -3418 | 31289 | AN8274 |
| 1040 | CONTIG145 | 115063 | 115402 | 1.68 | 1.80E-02 | transcription_start_site | - | 111683 | 111683 | -3549 | 31290 | AN8274 |
| 1040 | CONTIG145 | 115063 | 115402 | 1.68 | 1.80E-02 | transcription_start_site | - | 111607 | 111607 | -3625 | 31291 | AN8274 |

|      |           |        |        |      |          |                          |   |        |        |       |       |        |
|------|-----------|--------|--------|------|----------|--------------------------|---|--------|--------|-------|-------|--------|
| 1040 | CONTIG145 | 115063 | 115402 | 1.68 | 1.80E-02 | transcription_start_site | - | 111534 | 111534 | -3698 | 31292 | AN8274 |
| 1040 | CONTIG145 | 115063 | 115402 | 1.68 | 1.80E-02 | transcription_start_site | - | 111350 | 111350 | -3882 | 31293 | AN8274 |
| 1040 | CONTIG145 | 115063 | 115402 | 1.68 | 1.80E-02 | transcription_start_site | - | 110547 | 110547 | -4685 | 31294 | AN8274 |
| 468  | CONTIG145 | 112068 | 112327 | 2.36 | 1.45E-03 | transcription_start_site | - | 113037 | 113037 | 839   | 31302 | AN8275 |
| 1040 | CONTIG145 | 115063 | 115402 | 1.68 | 1.80E-02 | transcription_start_site | - | 114700 | 114700 | -532  | 31295 | AN8275 |
| 1040 | CONTIG145 | 115063 | 115402 | 1.68 | 1.80E-02 | transcription_start_site | - | 114510 | 114510 | -722  | 31296 | AN8275 |
| 1040 | CONTIG145 | 115063 | 115402 | 1.68 | 1.80E-02 | transcription_start_site | - | 114380 | 114380 | -852  | 31297 | AN8275 |
| 1040 | CONTIG145 | 115063 | 115402 | 1.68 | 1.80E-02 | transcription_start_site | - | 114231 | 114231 | -1001 | 31298 | AN8275 |
| 1040 | CONTIG145 | 115063 | 115402 | 1.68 | 1.80E-02 | transcription_start_site | - | 114132 | 114132 | -1100 | 31299 | AN8275 |
| 1040 | CONTIG145 | 115063 | 115402 | 1.68 | 1.80E-02 | transcription_start_site | - | 114021 | 114021 | -1211 | 31300 | AN8275 |
| 1040 | CONTIG145 | 115063 | 115402 | 1.68 | 1.80E-02 | transcription_start_site | - | 113391 | 113391 | -1841 | 31301 | AN8275 |
| 1040 | CONTIG145 | 115063 | 115402 | 1.68 | 1.80E-02 | transcription_start_site | - | 113037 | 113037 | -2195 | 31302 | AN8275 |
| 468  | CONTIG145 | 112068 | 112327 | 2.36 | 1.45E-03 | transcription_start_site | + | 116086 | 116086 | -3888 | 31303 | AN8276 |
| 468  | CONTIG145 | 112068 | 112327 | 2.36 | 1.45E-03 | transcription_start_site | + | 116272 | 116272 | -4074 | 31304 | AN8276 |
| 468  | CONTIG145 | 112068 | 112327 | 2.36 | 1.45E-03 | transcription_start_site | + | 116751 | 116751 | -4553 | 31305 | AN8276 |
| 468  | CONTIG145 | 112068 | 112327 | 2.36 | 1.45E-03 | transcription_start_site | + | 116993 | 116993 | -4795 | 31306 | AN8276 |
| 1040 | CONTIG145 | 115063 | 115402 | 1.68 | 1.80E-02 | transcription_start_site | + | 116086 | 116086 | -853  | 31303 | AN8276 |
| 1040 | CONTIG145 | 115063 | 115402 | 1.68 | 1.80E-02 | transcription_start_site | + | 116272 | 116272 | -1039 | 31304 | AN8276 |
| 1040 | CONTIG145 | 115063 | 115402 | 1.68 | 1.80E-02 | transcription_start_site | + | 116751 | 116751 | -1518 | 31305 | AN8276 |
| 1040 | CONTIG145 | 115063 | 115402 | 1.68 | 1.80E-02 | transcription_start_site | + | 116993 | 116993 | -1760 | 31306 | AN8276 |
| 86   | CONTIG145 | 123545 | 123969 | 3.12 | 0.00E+00 | transcription_start_site | - | 121167 | 121167 | -2590 | 31307 | AN8277 |
| 86   | CONTIG145 | 123545 | 123969 | 3.12 | 0.00E+00 | transcription_start_site | - | 121060 | 121060 | -2697 | 31308 | AN8277 |
| 86   | CONTIG145 | 123545 | 123969 | 3.12 | 0.00E+00 | transcription_start_site | - | 120945 | 120945 | -2812 | 31309 | AN8277 |
| 86   | CONTIG145 | 123545 | 123969 | 3.12 | 0.00E+00 | transcription_start_site | - | 120799 | 120799 | -2958 | 31310 | AN8277 |
| 86   | CONTIG145 | 123545 | 123969 | 3.12 | 0.00E+00 | transcription_start_site | - | 120391 | 120391 | -3366 | 31311 | AN8277 |
| 86   | CONTIG145 | 123545 | 123969 | 3.12 | 0.00E+00 | transcription_start_site | - | 119764 | 119764 | -3993 | 31312 | AN8277 |
| 320  | CONTIG145 | 122795 | 123434 | 2.59 | 2.26E-04 | transcription_start_site | - | 121167 | 121167 | -1947 | 31307 | AN8277 |
| 320  | CONTIG145 | 122795 | 123434 | 2.59 | 2.26E-04 | transcription_start_site | - | 121060 | 121060 | -2054 | 31308 | AN8277 |
| 320  | CONTIG145 | 122795 | 123434 | 2.59 | 2.26E-04 | transcription_start_site | - | 120945 | 120945 | -2169 | 31309 | AN8277 |
| 320  | CONTIG145 | 122795 | 123434 | 2.59 | 2.26E-04 | transcription_start_site | - | 120799 | 120799 | -2315 | 31310 | AN8277 |
| 320  | CONTIG145 | 122795 | 123434 | 2.59 | 2.26E-04 | transcription_start_site | - | 120391 | 120391 | -2723 | 31311 | AN8277 |
| 320  | CONTIG145 | 122795 | 123434 | 2.59 | 2.26E-04 | transcription_start_site | - | 119764 | 119764 | -3350 | 31312 | AN8277 |
| 86   | CONTIG145 | 123545 | 123969 | 3.12 | 0.00E+00 | transcription_start_site | + | 122837 | 122837 | 920   | 31315 | AN8278 |
| 320  | CONTIG145 | 122795 | 123434 | 2.59 | 2.26E-04 | transcription_start_site | + | 122837 | 122837 | 277   | 31315 | AN8278 |
| 320  | CONTIG145 | 122795 | 123434 | 2.59 | 2.26E-04 | transcription_start_site | + | 122495 | 122495 | 619   | 31314 | AN8278 |
| 320  | CONTIG145 | 122795 | 123434 | 2.59 | 2.26E-04 | transcription_start_site | + | 122358 | 122358 | 756   | 31313 | AN8278 |
| 86   | CONTIG145 | 123545 | 123969 | 3.12 | 0.00E+00 | transcription_start_site | + | 124445 | 124445 | -688  | 31316 | AN8279 |
| 86   | CONTIG145 | 123545 | 123969 | 3.12 | 0.00E+00 | transcription_start_site | + | 124715 | 124715 | -958  | 31317 | AN8279 |
| 86   | CONTIG145 | 123545 | 123969 | 3.12 | 0.00E+00 | transcription_start_site | + | 125187 | 125187 | -1430 | 31318 | AN8279 |
| 86   | CONTIG145 | 123545 | 123969 | 3.12 | 0.00E+00 | transcription_start_site | + | 125610 | 125610 | -1853 | 31319 | AN8279 |
| 320  | CONTIG145 | 122795 | 123434 | 2.59 | 2.26E-04 | transcription_start_site | + | 124445 | 124445 | -1330 | 31316 | AN8279 |
| 320  | CONTIG145 | 122795 | 123434 | 2.59 | 2.26E-04 | transcription_start_site | + | 124715 | 124715 | -1600 | 31317 | AN8279 |
| 320  | CONTIG145 | 122795 | 123434 | 2.59 | 2.26E-04 | transcription_start_site | + | 125187 | 125187 | -2072 | 31318 | AN8279 |
| 320  | CONTIG145 | 122795 | 123434 | 2.59 | 2.26E-04 | transcription_start_site | + | 125610 | 125610 | -2495 | 31319 | AN8279 |
| 86   | CONTIG145 | 123545 | 123969 | 3.12 | 0.00E+00 | transcription_start_site | + | 127359 | 127359 | -3602 | 31320 | AN8280 |
| 86   | CONTIG145 | 123545 | 123969 | 3.12 | 0.00E+00 | transcription_start_site | + | 127596 | 127596 | -3839 | 31321 | AN8280 |
| 86   | CONTIG145 | 123545 | 123969 | 3.12 | 0.00E+00 | transcription_start_site | + | 127897 | 127897 | -4140 | 31322 | AN8280 |
| 320  | CONTIG145 | 122795 | 123434 | 2.59 | 2.26E-04 | transcription_start_site | + | 127359 | 127359 | -4244 | 31320 | AN8280 |
| 320  | CONTIG145 | 122795 | 123434 | 2.59 | 2.26E-04 | transcription_start_site | + | 127596 | 127596 | -4481 | 31321 | AN8280 |
| 320  | CONTIG145 | 122795 | 123434 | 2.59 | 2.26E-04 | transcription_start_site | + | 127897 | 127897 | -4782 | 31322 | AN8280 |
| 1641 | CONTIG145 | 126765 | 127039 | 1.18 | 8.63E-02 | transcription_start_site | + | 127359 | 127359 | -457  | 31320 | AN8280 |
| 1641 | CONTIG145 | 126765 | 127039 | 1.18 | 8.63E-02 | transcription_start_site | + | 127596 | 127596 | -694  | 31321 | AN8280 |
| 1641 | CONTIG145 | 126765 | 127039 | 1.18 | 8.63E-02 | transcription_start_site | + | 127897 | 127897 | -995  | 31322 | AN8280 |
| 1641 | CONTIG145 | 126765 | 127039 | 1.18 | 8.63E-02 | transcription_start_site | + | 129538 | 129538 | -2636 | 31323 | AN8280 |
| 1517 | CONTIG145 | 139656 | 140027 | 1.26 | 3.61E-02 | transcription_start_site | - | 135348 | 135348 | -4493 | 31326 | AN8282 |
| 1928 | CONTIG145 | 137346 | 137695 | 0.99 | 1.54E-01 | transcription_start_site | - | 135348 | 135348 | -2172 | 31326 | AN8282 |
| 1517 | CONTIG145 | 139656 | 140027 | 1.26 | 3.61E-02 | transcription_start_site | + | 139895 | 139895 | -53   | 31327 | AN8283 |



|      |           |        |        |      |          |                          |   |        |        |       |       |        |
|------|-----------|--------|--------|------|----------|--------------------------|---|--------|--------|-------|-------|--------|
| 1517 | CONTIG145 | 139656 | 140027 | 1.26 | 3.61E-02 | transcription_start_site | + | 140202 | 140202 | -360  | 31328 | AN8283 |
| 1517 | CONTIG145 | 139656 | 140027 | 1.26 | 3.61E-02 | transcription_start_site | + | 140458 | 140458 | -616  | 31329 | AN8283 |
| 1517 | CONTIG145 | 139656 | 140027 | 1.26 | 3.61E-02 | transcription_start_site | + | 141574 | 141574 | -1732 | 31330 | AN8283 |
| 1928 | CONTIG145 | 137346 | 137695 | 0.99 | 1.54E-01 | transcription_start_site | + | 139895 | 139895 | -2374 | 31327 | AN8283 |
| 1928 | CONTIG145 | 137346 | 137695 | 0.99 | 1.54E-01 | transcription_start_site | + | 140202 | 140202 | -2681 | 31328 | AN8283 |
| 1928 | CONTIG145 | 137346 | 137695 | 0.99 | 1.54E-01 | transcription_start_site | + | 140458 | 140458 | -2937 | 31329 | AN8283 |
| 1928 | CONTIG145 | 137346 | 137695 | 0.99 | 1.54E-01 | transcription_start_site | + | 141574 | 141574 | -4053 | 31330 | AN8283 |
| 1517 | CONTIG145 | 139656 | 140027 | 1.26 | 3.61E-02 | transcription_start_site | + | 143480 | 143480 | -3638 | 31332 | AN8285 |
| 1929 | CONTIG145 | 172291 | 172874 | 0.99 | 1.54E-01 | transcription_start_site | - | 172454 | 172454 | -128  | 31358 | AN8293 |
| 1929 | CONTIG145 | 172291 | 172874 | 0.99 | 1.54E-01 | transcription_start_site | - | 172268 | 172268 | -314  | 31359 | AN8293 |
| 1929 | CONTIG145 | 172291 | 172874 | 0.99 | 1.54E-01 | transcription_start_site | - | 170706 | 170706 | -1876 | 31360 | AN8293 |
| 1929 | CONTIG145 | 172291 | 172874 | 0.99 | 1.54E-01 | transcription_start_site | - | 170390 | 170390 | -2192 | 31361 | AN8293 |
| 1929 | CONTIG145 | 172291 | 172874 | 0.99 | 1.54E-01 | transcription_start_site | - | 169678 | 169678 | -2904 | 31362 | AN8293 |
| 2336 | CONTIG150 | 22744  | 23468  | 0.6  | 1.57E-01 | transcription_start_site | - | 19214  | 19214  | -3892 | 31432 | AN8310 |
| 2336 | CONTIG150 | 22744  | 23468  | 0.6  | 1.57E-01 | transcription_start_site | - | 19030  | 19030  | -4076 | 31433 | AN8310 |
| 2336 | CONTIG150 | 22744  | 23468  | 0.6  | 1.57E-01 | transcription_start_site | - | 18787  | 18787  | -4319 | 31434 | AN8310 |
| 2336 | CONTIG150 | 22744  | 23468  | 0.6  | 1.57E-01 | transcription_start_site | - | 22760  | 22760  | -346  | 31435 | AN8311 |
| 2336 | CONTIG150 | 22744  | 23468  | 0.6  | 1.57E-01 | transcription_start_site | - | 22310  | 22310  | -796  | 31436 | AN8311 |
| 1418 | CONTIG150 | 54695  | 55267  | 1.33 | 7.70E-03 | transcription_start_site | - | 53957  | 53957  | -1024 | 31487 | AN8320 |
| 1418 | CONTIG150 | 54695  | 55267  | 1.33 | 7.70E-03 | transcription_start_site | - | 53867  | 53867  | -1114 | 31488 | AN8320 |
| 1418 | CONTIG150 | 54695  | 55267  | 1.33 | 7.70E-03 | transcription_start_site | + | 54981  | 54981  | 0     | 31489 | AN8321 |
| 1418 | CONTIG150 | 54695  | 55267  | 1.33 | 7.70E-03 | transcription_start_site | + | 55276  | 55276  | -295  | 31490 | AN8321 |
| 1418 | CONTIG150 | 54695  | 55267  | 1.33 | 7.70E-03 | transcription_start_site | + | 55573  | 55573  | -592  | 31491 | AN8321 |
| 1418 | CONTIG150 | 54695  | 55267  | 1.33 | 7.70E-03 | transcription_start_site | + | 55790  | 55790  | -809  | 31492 | AN8321 |
| 471  | CONTIG150 | 98646  | 99285  | 2.35 | 0.00E+00 | transcription_start_site | + | 99147  | 99147  | -181  | 31533 | AN8335 |
| 471  | CONTIG150 | 98646  | 99285  | 2.35 | 0.00E+00 | transcription_start_site | + | 103918 | 103918 | -4952 | 31537 | AN8337 |
| 924  | CONTIG150 | 108611 | 108895 | 1.8  | 2.51E-04 | transcription_start_site | - | 108629 | 108629 | -124  | 31543 | AN8339 |
| 1343 | CONTIG151 | 12617  | 12891  | 1.4  | 2.63E-02 | transcription_start_site | - | 12505  | 12505  | -249  | 31560 | AN8344 |
| 1343 | CONTIG151 | 12617  | 12891  | 1.4  | 2.63E-02 | transcription_start_site | - | 11432  | 11432  | -1322 | 31561 | AN8344 |
| 1343 | CONTIG151 | 12617  | 12891  | 1.4  | 2.63E-02 | transcription_start_site | - | 9848   | 9848   | -2906 | 31562 | AN8344 |
| 1343 | CONTIG151 | 12617  | 12891  | 1.4  | 2.63E-02 | transcription_start_site | - | 8854   | 8854   | -3900 | 31563 | AN8344 |
| 1343 | CONTIG151 | 12617  | 12891  | 1.4  | 2.63E-02 | transcription_start_site | - | 8555   | 8555   | -4199 | 31564 | AN8344 |
| 2287 | CONTIG151 | 15382  | 16851  | 0.68 | 6.77E-02 | transcription_start_site | - | 12505  | 12505  | -3611 | 31560 | AN8344 |
| 2287 | CONTIG151 | 15382  | 16851  | 0.68 | 6.77E-02 | transcription_start_site | - | 11432  | 11432  | -4684 | 31561 | AN8344 |
| 1343 | CONTIG151 | 12617  | 12891  | 1.4  | 2.63E-02 | transcription_start_site | + | 12916  | 12916  | -162  | 31565 | AN8345 |
| 1343 | CONTIG151 | 12617  | 12891  | 1.4  | 2.63E-02 | transcription_start_site | + | 12996  | 12996  | -242  | 31566 | AN8345 |
| 1343 | CONTIG151 | 12617  | 12891  | 1.4  | 2.63E-02 | transcription_start_site | + | 13065  | 13065  | -311  | 31567 | AN8345 |
| 1343 | CONTIG151 | 12617  | 12891  | 1.4  | 2.63E-02 | transcription_start_site | + | 13213  | 13213  | -459  | 31568 | AN8345 |
| 1343 | CONTIG151 | 12617  | 12891  | 1.4  | 2.63E-02 | transcription_start_site | + | 13443  | 13443  | -689  | 31569 | AN8345 |
| 1343 | CONTIG151 | 12617  | 12891  | 1.4  | 2.63E-02 | transcription_start_site | + | 13720  | 13720  | -966  | 31570 | AN8345 |
| 1343 | CONTIG151 | 12617  | 12891  | 1.4  | 2.63E-02 | transcription_start_site | + | 14061  | 14061  | -1307 | 31571 | AN8345 |
| 1343 | CONTIG151 | 12617  | 12891  | 1.4  | 2.63E-02 | transcription_start_site | + | 14867  | 14867  | -2113 | 31572 | AN8345 |
| 2287 | CONTIG151 | 15382  | 16851  | 0.68 | 6.77E-02 | transcription_start_site | + | 14867  | 14867  | 1249  | 31572 | AN8345 |
| 1343 | CONTIG151 | 12617  | 12891  | 1.4  | 2.63E-02 | transcription_start_site | + | 16808  | 16808  | -4054 | 31573 | AN8346 |
| 2287 | CONTIG151 | 15382  | 16851  | 0.68 | 6.77E-02 | transcription_start_site | + | 16808  | 16808  | -691  | 31573 | AN8346 |
| 2287 | CONTIG151 | 15382  | 16851  | 0.68 | 6.77E-02 | transcription_start_site | + | 19312  | 19312  | -3195 | 31574 | AN8347 |
| 2287 | CONTIG151 | 15382  | 16851  | 0.68 | 6.77E-02 | transcription_start_site | + | 19489  | 19489  | -3372 | 31575 | AN8347 |
| 2287 | CONTIG151 | 15382  | 16851  | 0.68 | 6.77E-02 | transcription_start_site | + | 19601  | 19601  | -3484 | 31576 | AN8347 |
| 2287 | CONTIG151 | 15382  | 16851  | 0.68 | 6.77E-02 | transcription_start_site | + | 19979  | 19979  | -3862 | 31577 | AN8347 |
| 2287 | CONTIG151 | 15382  | 16851  | 0.68 | 6.77E-02 | transcription_start_site | + | 20053  | 20053  | -3936 | 31578 | AN8347 |
| 2287 | CONTIG151 | 15382  | 16851  | 0.68 | 6.77E-02 | transcription_start_site | + | 20191  | 20191  | -4074 | 31579 | AN8347 |
| 2287 | CONTIG151 | 15382  | 16851  | 0.68 | 6.77E-02 | transcription_start_site | + | 20533  | 20533  | -4416 | 31580 | AN8347 |
| 2287 | CONTIG151 | 15382  | 16851  | 0.68 | 6.77E-02 | transcription_start_site | + | 21218  | 21218  | -5101 | 31581 | AN8347 |
| 359  | CONTIG151 | 39917  | 40416  | 2.52 | 0.00E+00 | transcription_start_site | - | 36108  | 36108  | -4058 | 31601 | AN8354 |
| 359  | CONTIG151 | 39917  | 40416  | 2.52 | 0.00E+00 | transcription_start_site | - | 36016  | 36016  | -4150 | 31602 | AN8354 |
| 359  | CONTIG151 | 39917  | 40416  | 2.52 | 0.00E+00 | transcription_start_site | - | 35552  | 35552  | -4614 | 31603 | AN8354 |
| 359  | CONTIG151 | 39917  | 40416  | 2.52 | 0.00E+00 | transcription_start_site | - | 39540  | 39540  | -626  | 31606 | AN8356 |

|      |           |       |       |      |          |                          |   |       |       |       |       |        |
|------|-----------|-------|-------|------|----------|--------------------------|---|-------|-------|-------|-------|--------|
| 359  | CONTIG151 | 39917 | 40416 | 2.52 | 0.00E+00 | transcription_start_site | - | 39279 | 39279 | -887  | 31607 | AN8356 |
| 359  | CONTIG151 | 39917 | 40416 | 2.52 | 0.00E+00 | transcription_start_site | + | 40507 | 40507 | -340  | 31608 | AN8357 |
| 359  | CONTIG151 | 39917 | 40416 | 2.52 | 0.00E+00 | transcription_start_site | + | 40690 | 40690 | -523  | 31609 | AN8357 |
| 359  | CONTIG151 | 39917 | 40416 | 2.52 | 0.00E+00 | transcription_start_site | + | 41494 | 41494 | -1327 | 31610 | AN8357 |
| 359  | CONTIG151 | 39917 | 40416 | 2.52 | 0.00E+00 | transcription_start_site | + | 41865 | 41865 | -1698 | 31611 | AN8357 |
| 359  | CONTIG151 | 39917 | 40416 | 2.52 | 0.00E+00 | transcription_start_site | + | 41994 | 41994 | -1827 | 31612 | AN8357 |
| 359  | CONTIG151 | 39917 | 40416 | 2.52 | 0.00E+00 | transcription_start_site | + | 42355 | 42355 | -2188 | 31613 | AN8357 |
| 359  | CONTIG151 | 39917 | 40416 | 2.52 | 0.00E+00 | transcription_start_site | + | 43199 | 43199 | -3032 | 31614 | AN8358 |
| 359  | CONTIG151 | 39917 | 40416 | 2.52 | 0.00E+00 | transcription_start_site | + | 43421 | 43421 | -3254 | 31615 | AN8358 |
| 359  | CONTIG151 | 39917 | 40416 | 2.52 | 0.00E+00 | transcription_start_site | + | 43692 | 43692 | -3525 | 31616 | AN8358 |
| 359  | CONTIG151 | 39917 | 40416 | 2.52 | 0.00E+00 | transcription_start_site | + | 44586 | 44586 | -4419 | 31617 | AN8358 |
| 2177 | CONTIG151 | 56777 | 57504 | 0.82 | 1.97E-01 | transcription_start_site | - | 56543 | 56543 | -597  | 31628 | AN8362 |
| 2177 | CONTIG151 | 56777 | 57504 | 0.82 | 1.97E-01 | transcription_start_site | - | 55993 | 55993 | -1147 | 31629 | AN8362 |
| 2177 | CONTIG151 | 56777 | 57504 | 0.82 | 1.97E-01 | transcription_start_site | + | 57450 | 57450 | -309  | 31630 | AN8363 |
| 2177 | CONTIG151 | 56777 | 57504 | 0.82 | 1.97E-01 | transcription_start_site | + | 58158 | 58158 | -1017 | 31631 | AN8363 |
| 2177 | CONTIG151 | 56777 | 57504 | 0.82 | 1.97E-01 | transcription_start_site | + | 58330 | 58330 | -1189 | 31632 | AN8363 |
| 2177 | CONTIG151 | 56777 | 57504 | 0.82 | 1.97E-01 | transcription_start_site | + | 60298 | 60298 | -3157 | 31633 | AN8364 |
| 2177 | CONTIG151 | 56777 | 57504 | 0.82 | 1.97E-01 | transcription_start_site | + | 60553 | 60553 | -3412 | 31634 | AN8364 |
| 105  | CONTIG151 | 65038 | 65387 | 3.07 | 0.00E+00 | transcription_start_site | - | 64806 | 64806 | -406  | 31635 | AN8365 |
| 105  | CONTIG151 | 65038 | 65387 | 3.07 | 0.00E+00 | transcription_start_site | - | 64474 | 64474 | -738  | 31636 | AN8365 |
| 105  | CONTIG151 | 65038 | 65387 | 3.07 | 0.00E+00 | transcription_start_site | - | 64152 | 64152 | -1060 | 31637 | AN8365 |
| 105  | CONTIG151 | 65038 | 65387 | 3.07 | 0.00E+00 | transcription_start_site | - | 63730 | 63730 | -1482 | 31638 | AN8365 |
| 105  | CONTIG151 | 65038 | 65387 | 3.07 | 0.00E+00 | transcription_start_site | - | 62520 | 62520 | -2692 | 31639 | AN8365 |
| 105  | CONTIG151 | 65038 | 65387 | 3.07 | 0.00E+00 | transcription_start_site | - | 62217 | 62217 | -2995 | 31640 | AN8365 |
| 105  | CONTIG151 | 65038 | 65387 | 3.07 | 0.00E+00 | transcription_start_site | + | 70351 | 70351 | -5138 | 31641 | AN8366 |
| 2376 | CONTIG152 | 4286  | 4625  | 0.4  | 1.97E-01 | transcription_start_site | - | 4251  | 4251  | -204  | 31644 | AN8367 |
| 2376 | CONTIG152 | 4286  | 4625  | 0.4  | 1.97E-01 | transcription_start_site | - | 4724  | 4724  | 268   | 31643 | AN8367 |
| 2376 | CONTIG152 | 4286  | 4625  | 0.4  | 1.97E-01 | transcription_start_site | - | 4953  | 4953  | 497   | 31642 | AN8367 |
| 2376 | CONTIG152 | 4286  | 4625  | 0.4  | 1.97E-01 | transcription_start_site | + | 7598  | 7598  | -3142 | 31648 | AN8369 |
| 2376 | CONTIG152 | 4286  | 4625  | 0.4  | 1.97E-01 | transcription_start_site | + | 7718  | 7718  | -3262 | 31649 | AN8369 |
| 2376 | CONTIG152 | 4286  | 4625  | 0.4  | 1.97E-01 | transcription_start_site | + | 7869  | 7869  | -3413 | 31650 | AN8369 |
| 2259 | CONTIG152 | 26858 | 27137 | 0.72 | 2.05E-02 | transcription_start_site | - | 23184 | 23184 | -3813 | 31658 | AN8371 |
| 2259 | CONTIG152 | 26858 | 27137 | 0.72 | 2.05E-02 | transcription_start_site | - | 22909 | 22909 | -4088 | 31659 | AN8371 |
| 2259 | CONTIG152 | 26858 | 27137 | 0.72 | 2.05E-02 | transcription_start_site | - | 22650 | 22650 | -4347 | 31660 | AN8371 |
| 2259 | CONTIG152 | 26858 | 27137 | 0.72 | 2.05E-02 | transcription_start_site | - | 22008 | 22008 | -4989 | 31661 | AN8371 |
| 2372 | CONTIG152 | 25893 | 26466 | 0.42 | 1.76E-01 | transcription_start_site | - | 23184 | 23184 | -2995 | 31658 | AN8371 |
| 2372 | CONTIG152 | 25893 | 26466 | 0.42 | 1.76E-01 | transcription_start_site | - | 22909 | 22909 | -3270 | 31659 | AN8371 |
| 2372 | CONTIG152 | 25893 | 26466 | 0.42 | 1.76E-01 | transcription_start_site | - | 22650 | 22650 | -3529 | 31660 | AN8371 |
| 2372 | CONTIG152 | 25893 | 26466 | 0.42 | 1.76E-01 | transcription_start_site | - | 22008 | 22008 | -4171 | 31661 | AN8371 |
| 2372 | CONTIG152 | 25893 | 26466 | 0.42 | 1.76E-01 | transcription_start_site | + | 25220 | 25220 | 959   | 31664 | AN8372 |
| 2259 | CONTIG152 | 26858 | 27137 | 0.72 | 2.05E-02 | transcription_start_site | + | 26842 | 26842 | 155   | 31665 | AN8373 |
| 2259 | CONTIG152 | 26858 | 27137 | 0.72 | 2.05E-02 | transcription_start_site | + | 27558 | 27558 | -560  | 31666 | AN8373 |
| 2372 | CONTIG152 | 25893 | 26466 | 0.42 | 1.76E-01 | transcription_start_site | + | 26842 | 26842 | -662  | 31665 | AN8373 |
| 2372 | CONTIG152 | 25893 | 26466 | 0.42 | 1.76E-01 | transcription_start_site | + | 27558 | 27558 | -1378 | 31666 | AN8373 |
| 2259 | CONTIG152 | 26858 | 27137 | 0.72 | 2.05E-02 | transcription_start_site | - | 28069 | 28069 | 1071  | 31677 | AN8374 |
| 1781 | CONTIG152 | 50558 | 50837 | 1.08 | 7.06E-04 | transcription_start_site | - | 50655 | 50655 | -42   | 31697 | AN8380 |
| 1781 | CONTIG152 | 50558 | 50837 | 1.08 | 7.06E-04 | transcription_start_site | - | 50893 | 50893 | 195   | 31696 | AN8380 |
| 1781 | CONTIG152 | 50558 | 50837 | 1.08 | 7.06E-04 | transcription_start_site | - | 50403 | 50403 | -294  | 31698 | AN8380 |
| 1781 | CONTIG152 | 50558 | 50837 | 1.08 | 7.06E-04 | transcription_start_site | - | 50361 | 50361 | -336  | 31699 | AN8380 |
| 1781 | CONTIG152 | 50558 | 50837 | 1.08 | 7.06E-04 | transcription_start_site | + | 52610 | 52610 | -1912 | 31700 | AN8381 |
| 1781 | CONTIG152 | 50558 | 50837 | 1.08 | 7.06E-04 | transcription_start_site | + | 52852 | 52852 | -2154 | 31701 | AN8381 |
| 2271 | CONTIG153 | 23105 | 23464 | 0.71 | 1.97E-01 | transcription_start_site | + | 24213 | 24213 | -928  | 31715 | AN8387 |
| 2271 | CONTIG153 | 23105 | 23464 | 0.71 | 1.97E-01 | transcription_start_site | + | 24319 | 24319 | -1034 | 31716 | AN8387 |
| 2271 | CONTIG153 | 23105 | 23464 | 0.71 | 1.97E-01 | transcription_start_site | + | 24901 | 24901 | -1616 | 31717 | AN8387 |
| 2271 | CONTIG153 | 23105 | 23464 | 0.71 | 1.97E-01 | transcription_start_site | + | 27515 | 27515 | -4230 | 31718 | AN8388 |
| 2271 | CONTIG153 | 23105 | 23464 | 0.71 | 1.97E-01 | transcription_start_site | + | 27651 | 27651 | -4366 | 31719 | AN8388 |
| 1189 | CONTIG153 | 32721 | 33065 | 1.53 | 7.08E-03 | transcription_start_site | - | 32329 | 32329 | -564  | 31724 | AN8390 |

|      |           |        |        |      |          |                          |   |        |        |       |       |        |
|------|-----------|--------|--------|------|----------|--------------------------|---|--------|--------|-------|-------|--------|
| 1189 | CONTIG153 | 32721  | 33065  | 1.53 | 7.08E-03 | transcription_start_site | - | 31906  | 31906  | -987  | 31725 | AN8390 |
| 1189 | CONTIG153 | 32721  | 33065  | 1.53 | 7.08E-03 | transcription_start_site | - | 31721  | 31721  | -1172 | 31726 | AN8390 |
| 1189 | CONTIG153 | 32721  | 33065  | 1.53 | 7.08E-03 | transcription_start_site | - | 31472  | 31472  | -1421 | 31727 | AN8390 |
| 1189 | CONTIG153 | 32721  | 33065  | 1.53 | 7.08E-03 | transcription_start_site | + | 34834  | 34834  | -1941 | 31728 | AN8391 |
| 1189 | CONTIG153 | 32721  | 33065  | 1.53 | 7.08E-03 | transcription_start_site | + | 35681  | 35681  | -2788 | 31729 | AN8391 |
| 1189 | CONTIG153 | 32721  | 33065  | 1.53 | 7.08E-03 | transcription_start_site | + | 35879  | 35879  | -2986 | 31730 | AN8391 |
| 1189 | CONTIG153 | 32721  | 33065  | 1.53 | 7.08E-03 | transcription_start_site | + | 36227  | 36227  | -3334 | 31731 | AN8391 |
| 1189 | CONTIG153 | 32721  | 33065  | 1.53 | 7.08E-03 | transcription_start_site | + | 36566  | 36566  | -3673 | 31732 | AN8391 |
| 1189 | CONTIG153 | 32721  | 33065  | 1.53 | 7.08E-03 | transcription_start_site | + | 37615  | 37615  | -4722 | 31733 | AN8392 |
| 1189 | CONTIG153 | 32721  | 33065  | 1.53 | 7.08E-03 | transcription_start_site | + | 37924  | 37924  | -5031 | 31734 | AN8392 |
| 287  | CONTIG153 | 56408  | 57282  | 2.65 | 0.00E+00 | transcription_start_site | - | 54507  | 54507  | -2338 | 31748 | AN8397 |
| 287  | CONTIG153 | 56408  | 57282  | 2.65 | 0.00E+00 | transcription_start_site | - | 54350  | 54350  | -2495 | 31749 | AN8397 |
| 2134 | CONTIG153 | 54528  | 55332  | 0.85 | 1.08E-01 | transcription_start_site | - | 54507  | 54507  | -423  | 31748 | AN8397 |
| 2134 | CONTIG153 | 54528  | 55332  | 0.85 | 1.08E-01 | transcription_start_site | - | 54350  | 54350  | -580  | 31749 | AN8397 |
| 287  | CONTIG153 | 56408  | 57282  | 2.65 | 0.00E+00 | transcription_start_site | + | 55667  | 55667  | 1178  | 31751 | AN8398 |
| 2134 | CONTIG153 | 54528  | 55332  | 0.85 | 1.08E-01 | transcription_start_site | + | 54920  | 54920  | 10    | 31750 | AN8398 |
| 2134 | CONTIG153 | 54528  | 55332  | 0.85 | 1.08E-01 | transcription_start_site | + | 55667  | 55667  | -737  | 31751 | AN8398 |
| 287  | CONTIG153 | 56408  | 57282  | 2.65 | 0.00E+00 | transcription_start_site | + | 56966  | 56966  | -121  | 31752 | AN8399 |
| 287  | CONTIG153 | 56408  | 57282  | 2.65 | 0.00E+00 | transcription_start_site | + | 57126  | 57126  | -281  | 31753 | AN8399 |
| 287  | CONTIG153 | 56408  | 57282  | 2.65 | 0.00E+00 | transcription_start_site | + | 57874  | 57874  | -1029 | 31754 | AN8399 |
| 287  | CONTIG153 | 56408  | 57282  | 2.65 | 0.00E+00 | transcription_start_site | + | 58366  | 58366  | -1521 | 31755 | AN8399 |
| 287  | CONTIG153 | 56408  | 57282  | 2.65 | 0.00E+00 | transcription_start_site | + | 58562  | 58562  | -1717 | 31756 | AN8399 |
| 287  | CONTIG153 | 56408  | 57282  | 2.65 | 0.00E+00 | transcription_start_site | + | 59472  | 59472  | -2627 | 31757 | AN8399 |
| 287  | CONTIG153 | 56408  | 57282  | 2.65 | 0.00E+00 | transcription_start_site | + | 59922  | 59922  | -3077 | 31758 | AN8399 |
| 287  | CONTIG153 | 56408  | 57282  | 2.65 | 0.00E+00 | transcription_start_site | + | 60122  | 60122  | -3277 | 31759 | AN8399 |
| 287  | CONTIG153 | 56408  | 57282  | 2.65 | 0.00E+00 | transcription_start_site | + | 60629  | 60629  | -3784 | 31760 | AN8399 |
| 2134 | CONTIG153 | 54528  | 55332  | 0.85 | 1.08E-01 | transcription_start_site | + | 56966  | 56966  | -2036 | 31752 | AN8399 |
| 2134 | CONTIG153 | 54528  | 55332  | 0.85 | 1.08E-01 | transcription_start_site | + | 57126  | 57126  | -2196 | 31753 | AN8399 |
| 2134 | CONTIG153 | 54528  | 55332  | 0.85 | 1.08E-01 | transcription_start_site | + | 57874  | 57874  | -2944 | 31754 | AN8399 |
| 2134 | CONTIG153 | 54528  | 55332  | 0.85 | 1.08E-01 | transcription_start_site | + | 58366  | 58366  | -3436 | 31755 | AN8399 |
| 2134 | CONTIG153 | 54528  | 55332  | 0.85 | 1.08E-01 | transcription_start_site | + | 58562  | 58562  | -3632 | 31756 | AN8399 |
| 2134 | CONTIG153 | 54528  | 55332  | 0.85 | 1.08E-01 | transcription_start_site | + | 59472  | 59472  | -4542 | 31757 | AN8399 |
| 2134 | CONTIG153 | 54528  | 55332  | 0.85 | 1.08E-01 | transcription_start_site | + | 59922  | 59922  | -4992 | 31758 | AN8399 |
| 2134 | CONTIG153 | 54528  | 55332  | 0.85 | 1.08E-01 | transcription_start_site | + | 60122  | 60122  | -5192 | 31759 | AN8399 |
| 1632 | CONTIG153 | 81903  | 82342  | 1.18 | 3.01E-02 | transcription_start_site | - | 78367  | 78367  | -3755 | 31784 | AN8406 |
| 1632 | CONTIG153 | 81903  | 82342  | 1.18 | 3.01E-02 | transcription_start_site | - | 78159  | 78159  | -3963 | 31785 | AN8406 |
| 1632 | CONTIG153 | 81903  | 82342  | 1.18 | 3.01E-02 | transcription_start_site | - | 77268  | 77268  | -4854 | 31786 | AN8406 |
| 1632 | CONTIG153 | 81903  | 82342  | 1.18 | 3.01E-02 | transcription_start_site | + | 85396  | 85396  | -3273 | 31795 | AN8409 |
| 1632 | CONTIG153 | 81903  | 82342  | 1.18 | 3.01E-02 | transcription_start_site | + | 86025  | 86025  | -3902 | 31796 | AN8409 |
| 1632 | CONTIG153 | 81903  | 82342  | 1.18 | 3.01E-02 | transcription_start_site | + | 86759  | 86759  | -4636 | 31797 | AN8410 |
| 1632 | CONTIG153 | 81903  | 82342  | 1.18 | 3.01E-02 | transcription_start_site | + | 87079  | 87079  | -4956 | 31798 | AN8410 |
| 1812 | CONTIG153 | 131703 | 131992 | 1.06 | 4.78E-02 | transcription_start_site | - | 128670 | 128670 | -3177 | 31826 | AN8420 |
| 1812 | CONTIG153 | 131703 | 131992 | 1.06 | 4.78E-02 | transcription_start_site | - | 128369 | 128369 | -3478 | 31827 | AN8420 |
| 1812 | CONTIG153 | 131703 | 131992 | 1.06 | 4.78E-02 | transcription_start_site | + | 131989 | 131989 | -141  | 31828 | AN8421 |
| 1812 | CONTIG153 | 131703 | 131992 | 1.06 | 4.78E-02 | transcription_start_site | + | 132127 | 132127 | -279  | 31829 | AN8421 |
| 1812 | CONTIG153 | 131703 | 131992 | 1.06 | 4.78E-02 | transcription_start_site | + | 132433 | 132433 | -585  | 31830 | AN8421 |
| 1812 | CONTIG153 | 131703 | 131992 | 1.06 | 4.78E-02 | transcription_start_site | + | 132929 | 132929 | -1081 | 31831 | AN8421 |
| 2289 | CONTIG153 | 137259 | 137983 | 0.68 | 1.57E-01 | transcription_start_site | - | 134593 | 134593 | -3028 | 31832 | AN8422 |
| 2289 | CONTIG153 | 137259 | 137983 | 0.68 | 1.57E-01 | transcription_start_site | - | 134453 | 134453 | -3168 | 31833 | AN8422 |
| 2289 | CONTIG153 | 137259 | 137983 | 0.68 | 1.57E-01 | transcription_start_site | - | 134119 | 134119 | -3502 | 31834 | AN8422 |
| 2289 | CONTIG153 | 137259 | 137983 | 0.68 | 1.57E-01 | transcription_start_site | - | 138844 | 138844 | 1223  | 31839 | AN8423 |
| 2225 | CONTIG153 | 158570 | 158844 | 0.77 | 1.54E-01 | transcription_start_site | - | 158547 | 158547 | -160  | 31853 | AN8430 |
| 2225 | CONTIG153 | 158570 | 158844 | 0.77 | 1.54E-01 | transcription_start_site | - | 158332 | 158332 | -375  | 31854 | AN8430 |
| 2225 | CONTIG153 | 158570 | 158844 | 0.77 | 1.54E-01 | transcription_start_site | + | 158870 | 158870 | -163  | 31855 | AN8431 |
| 2225 | CONTIG153 | 158570 | 158844 | 0.77 | 1.54E-01 | transcription_start_site | + | 159031 | 159031 | -324  | 31856 | AN8431 |
| 1957 | CONTIG153 | 198771 | 199551 | 0.97 | 6.74E-02 | transcription_start_site | - | 195997 | 195997 | -3164 | 31894 | AN8443 |
| 1957 | CONTIG153 | 198771 | 199551 | 0.97 | 6.74E-02 | transcription_start_site | - | 195725 | 195725 | -3436 | 31895 | AN8443 |

|      |           |        |        |      |          |                          |   |        |        |       |       |        |
|------|-----------|--------|--------|------|----------|--------------------------|---|--------|--------|-------|-------|--------|
| 1957 | CONTIG153 | 198771 | 199551 | 0.97 | 6.74E-02 | transcription_start_site | - | 198406 | 198406 | -755  | 31896 | AN8444 |
| 1957 | CONTIG153 | 198771 | 199551 | 0.97 | 6.74E-02 | transcription_start_site | - | 198119 | 198119 | -1042 | 31897 | AN8444 |
| 1957 | CONTIG153 | 198771 | 199551 | 0.97 | 6.74E-02 | transcription_start_site | - | 196920 | 196920 | -2241 | 31898 | AN8444 |
| 1161 | CONTIG153 | 216767 | 217109 | 1.56 | 6.24E-03 | transcription_start_site | - | 216676 | 216676 | -262  | 31912 | AN8449 |
| 1161 | CONTIG153 | 216767 | 217109 | 1.56 | 6.24E-03 | transcription_start_site | - | 216378 | 216378 | -560  | 31913 | AN8449 |
| 1161 | CONTIG153 | 216767 | 217109 | 1.56 | 6.24E-03 | transcription_start_site | - | 214880 | 214880 | -2058 | 31914 | AN8449 |
| 1161 | CONTIG153 | 216767 | 217109 | 1.56 | 6.24E-03 | transcription_start_site | - | 214760 | 214760 | -2178 | 31915 | AN8449 |
| 1161 | CONTIG153 | 216767 | 217109 | 1.56 | 6.24E-03 | transcription_start_site | - | 214322 | 214322 | -2616 | 31916 | AN8449 |
| 1161 | CONTIG153 | 216767 | 217109 | 1.56 | 6.24E-03 | transcription_start_site | - | 214151 | 214151 | -2787 | 31917 | AN8449 |
| 2094 | CONTIG153 | 258079 | 259255 | 0.88 | 5.49E-02 | transcription_start_site | - | 253426 | 253426 | -5241 | 31948 | AN8459 |
| 2094 | CONTIG153 | 258079 | 259255 | 0.88 | 5.49E-02 | transcription_start_site | - | 253207 | 253207 | -5460 | 31949 | AN8459 |
| 2094 | CONTIG153 | 258079 | 259255 | 0.88 | 5.49E-02 | transcription_start_site | - | 258071 | 258071 | -596  | 31954 | AN8461 |
| 2094 | CONTIG153 | 258079 | 259255 | 0.88 | 5.49E-02 | transcription_start_site | - | 260129 | 260129 | 1462  | 31955 | AN8462 |
| 2094 | CONTIG153 | 258079 | 259255 | 0.88 | 5.49E-02 | transcription_start_site | + | 261846 | 261846 | -3179 | 31956 | AN8463 |
| 2094 | CONTIG153 | 258079 | 259255 | 0.88 | 5.49E-02 | transcription_start_site | + | 262213 | 262213 | -3546 | 31957 | AN8463 |
| 2095 | CONTIG153 | 279155 | 279654 | 0.88 | 5.49E-02 | transcription_start_site | - | 279151 | 279151 | -253  | 31968 | AN8467 |
| 2095 | CONTIG153 | 279155 | 279654 | 0.88 | 5.49E-02 | transcription_start_site | - | 278976 | 278976 | -428  | 31969 | AN8467 |
| 2095 | CONTIG153 | 279155 | 279654 | 0.88 | 5.49E-02 | transcription_start_site | - | 278659 | 278659 | -745  | 31970 | AN8467 |
| 2095 | CONTIG153 | 279155 | 279654 | 0.88 | 5.49E-02 | transcription_start_site | - | 278353 | 278353 | -1051 | 31971 | AN8467 |
| 971  | CONTIG153 | 305254 | 305692 | 1.74 | 2.32E-03 | transcription_start_site | - | 300756 | 300756 | -4717 | 31998 | AN8475 |
| 971  | CONTIG153 | 305254 | 305692 | 1.74 | 2.32E-03 | transcription_start_site | - | 300433 | 300433 | -5040 | 31999 | AN8475 |
| 971  | CONTIG153 | 305254 | 305692 | 1.74 | 2.32E-03 | transcription_start_site | + | 305130 | 305130 | 343   | 32005 | AN8477 |
| 971  | CONTIG153 | 305254 | 305692 | 1.74 | 2.32E-03 | transcription_start_site | + | 306858 | 306858 | -1385 | 32006 | AN8478 |
| 971  | CONTIG153 | 305254 | 305692 | 1.74 | 2.32E-03 | transcription_start_site | + | 307917 | 307917 | -2444 | 32007 | AN8478 |
| 831  | CONTIG153 | 338863 | 339217 | 1.89 | 8.43E-04 | transcription_start_site | + | 339352 | 339352 | -312  | 32026 | AN8483 |
| 831  | CONTIG153 | 338863 | 339217 | 1.89 | 8.43E-04 | transcription_start_site | + | 339527 | 339527 | -487  | 32027 | AN8483 |
| 943  | CONTIG153 | 339908 | 340409 | 1.77 | 1.77E-03 | transcription_start_site | + | 339527 | 339527 | 631   | 32027 | AN8483 |
| 943  | CONTIG153 | 339908 | 340409 | 1.77 | 1.77E-03 | transcription_start_site | + | 339352 | 339352 | 806   | 32026 | AN8483 |
| 1454 | CONTIG153 | 346894 | 347313 | 1.3  | 1.80E-02 | transcription_start_site | - | 344034 | 344034 | -3069 | 32028 | AN8484 |
| 1454 | CONTIG153 | 346894 | 347313 | 1.3  | 1.80E-02 | transcription_start_site | - | 346572 | 346572 | -531  | 32029 | AN8485 |
| 1454 | CONTIG153 | 346894 | 347313 | 1.3  | 1.80E-02 | transcription_start_site | - | 345880 | 345880 | -1223 | 32030 | AN8485 |
| 1454 | CONTIG153 | 346894 | 347313 | 1.3  | 1.80E-02 | transcription_start_site | + | 349086 | 349086 | -1982 | 32031 | AN8486 |
| 1454 | CONTIG153 | 346894 | 347313 | 1.3  | 1.80E-02 | transcription_start_site | + | 351875 | 351875 | -4771 | 32032 | AN8487 |
| 830  | CONTIG153 | 359259 | 360427 | 1.89 | 0.00E+00 | transcription_start_site | - | 358972 | 358972 | -871  | 32038 | AN8489 |
| 830  | CONTIG153 | 359259 | 360427 | 1.89 | 0.00E+00 | transcription_start_site | - | 358198 | 358198 | -1645 | 32039 | AN8489 |
| 830  | CONTIG153 | 359259 | 360427 | 1.89 | 0.00E+00 | transcription_start_site | - | 357122 | 357122 | -2721 | 32040 | AN8489 |
| 830  | CONTIG153 | 359259 | 360427 | 1.89 | 0.00E+00 | transcription_start_site | - | 356339 | 356339 | -3504 | 32041 | AN8489 |
| 2226 | CONTIG153 | 362557 | 362844 | 0.77 | 1.54E-01 | transcription_start_site | - | 358972 | 358972 | -3728 | 32038 | AN8489 |
| 2226 | CONTIG153 | 362557 | 362844 | 0.77 | 1.54E-01 | transcription_start_site | - | 358198 | 358198 | -4502 | 32039 | AN8489 |
| 972  | CONTIG153 | 366692 | 366968 | 1.74 | 2.32E-03 | transcription_start_site | - | 366430 | 366430 | -400  | 32042 | AN8490 |
| 972  | CONTIG153 | 366692 | 366968 | 1.74 | 2.32E-03 | transcription_start_site | - | 366255 | 366255 | -575  | 32043 | AN8490 |
| 972  | CONTIG153 | 366692 | 366968 | 1.74 | 2.32E-03 | transcription_start_site | - | 365964 | 365964 | -866  | 32044 | AN8490 |
| 972  | CONTIG153 | 366692 | 366968 | 1.74 | 2.32E-03 | transcription_start_site | + | 366964 | 366964 | -134  | 32045 | AN8491 |
| 972  | CONTIG153 | 366692 | 366968 | 1.74 | 2.32E-03 | transcription_start_site | + | 367101 | 367101 | -271  | 32046 | AN8491 |
| 972  | CONTIG153 | 366692 | 366968 | 1.74 | 2.32E-03 | transcription_start_site | + | 367321 | 367321 | -491  | 32047 | AN8491 |
| 2226 | CONTIG153 | 362557 | 362844 | 0.77 | 1.54E-01 | transcription_start_site | + | 366964 | 366964 | -4263 | 32045 | AN8491 |
| 2226 | CONTIG153 | 362557 | 362844 | 0.77 | 1.54E-01 | transcription_start_site | + | 367101 | 367101 | -4400 | 32046 | AN8491 |
| 2226 | CONTIG153 | 362557 | 362844 | 0.77 | 1.54E-01 | transcription_start_site | + | 367321 | 367321 | -4620 | 32047 | AN8491 |
| 972  | CONTIG153 | 366692 | 366968 | 1.74 | 2.32E-03 | transcription_start_site | + | 369439 | 369439 | -2609 | 32053 | AN8493 |
| 972  | CONTIG153 | 366692 | 366968 | 1.74 | 2.32E-03 | transcription_start_site | + | 369607 | 369607 | -2777 | 32054 | AN8493 |
| 972  | CONTIG153 | 366692 | 366968 | 1.74 | 2.32E-03 | transcription_start_site | + | 369912 | 369912 | -3082 | 32055 | AN8493 |
| 972  | CONTIG153 | 366692 | 366968 | 1.74 | 2.32E-03 | transcription_start_site | + | 370177 | 370177 | -3347 | 32056 | AN8493 |
| 972  | CONTIG153 | 366692 | 366968 | 1.74 | 2.32E-03 | transcription_start_site | + | 370384 | 370384 | -3554 | 32057 | AN8493 |
| 972  | CONTIG153 | 366692 | 366968 | 1.74 | 2.32E-03 | transcription_start_site | + | 370757 | 370757 | -3927 | 32058 | AN8493 |
| 1117 | CONTIG153 | 375692 | 376481 | 1.59 | 0.00E+00 | transcription_start_site | - | 373741 | 373741 | -2345 | 32059 | AN8494 |
| 1117 | CONTIG153 | 375692 | 376481 | 1.59 | 0.00E+00 | transcription_start_site | - | 373427 | 373427 | -2659 | 32060 | AN8494 |
| 1117 | CONTIG153 | 375692 | 376481 | 1.59 | 0.00E+00 | transcription_start_site | - | 373037 | 373037 | -3049 | 32061 | AN8494 |

|      |           |        |        |      |          |                          |   |        |        |       |       |        |
|------|-----------|--------|--------|------|----------|--------------------------|---|--------|--------|-------|-------|--------|
| 1117 | CONTIG153 | 375692 | 376481 | 1.59 | 0.00E+00 | transcription_start_site | - | 372292 | 372292 | -3794 | 32062 | AN8494 |
| 1117 | CONTIG153 | 375692 | 376481 | 1.59 | 0.00E+00 | transcription_start_site | - | 372045 | 372045 | -4041 | 32063 | AN8494 |
| 1117 | CONTIG153 | 375692 | 376481 | 1.59 | 0.00E+00 | transcription_start_site | - | 371639 | 371639 | -4447 | 32064 | AN8494 |
| 1958 | CONTIG153 | 374792 | 375584 | 0.97 | 6.74E-02 | transcription_start_site | - | 373741 | 373741 | -1447 | 32059 | AN8494 |
| 1958 | CONTIG153 | 374792 | 375584 | 0.97 | 6.74E-02 | transcription_start_site | - | 373427 | 373427 | -1761 | 32060 | AN8494 |
| 1958 | CONTIG153 | 374792 | 375584 | 0.97 | 6.74E-02 | transcription_start_site | - | 373037 | 373037 | -2151 | 32061 | AN8494 |
| 1958 | CONTIG153 | 374792 | 375584 | 0.97 | 6.74E-02 | transcription_start_site | - | 372292 | 372292 | -2896 | 32062 | AN8494 |
| 1958 | CONTIG153 | 374792 | 375584 | 0.97 | 6.74E-02 | transcription_start_site | - | 372045 | 372045 | -3143 | 32063 | AN8494 |
| 1958 | CONTIG153 | 374792 | 375584 | 0.97 | 6.74E-02 | transcription_start_site | - | 371639 | 371639 | -3549 | 32064 | AN8494 |
| 1117 | CONTIG153 | 375692 | 376481 | 1.59 | 0.00E+00 | transcription_start_site | + | 377090 | 377090 | -1003 | 32065 | AN8495 |
| 1958 | CONTIG153 | 374792 | 375584 | 0.97 | 6.74E-02 | transcription_start_site | + | 377090 | 377090 | -1902 | 32065 | AN8495 |
| 2150 | CONTIG153 | 384546 | 385128 | 0.83 | 7.38E-02 | transcription_start_site | - | 381357 | 381357 | -3480 | 32066 | AN8496 |
| 2150 | CONTIG153 | 384546 | 385128 | 0.83 | 7.38E-02 | transcription_start_site | - | 381078 | 381078 | -3759 | 32067 | AN8496 |
| 2150 | CONTIG153 | 384546 | 385128 | 0.83 | 7.38E-02 | transcription_start_site | - | 380714 | 380714 | -4123 | 32068 | AN8496 |
| 2150 | CONTIG153 | 384546 | 385128 | 0.83 | 7.38E-02 | transcription_start_site | - | 380183 | 380183 | -4654 | 32069 | AN8496 |
| 1672 | CONTIG153 | 386851 | 387220 | 1.15 | 3.34E-02 | transcription_start_site | - | 382224 | 382224 | -4811 | 32070 | AN8497 |
| 1672 | CONTIG153 | 386851 | 387220 | 1.15 | 3.34E-02 | transcription_start_site | - | 382070 | 382070 | -4965 | 32071 | AN8497 |
| 2150 | CONTIG153 | 384546 | 385128 | 0.83 | 7.38E-02 | transcription_start_site | - | 382224 | 382224 | -2613 | 32070 | AN8497 |
| 2150 | CONTIG153 | 384546 | 385128 | 0.83 | 7.38E-02 | transcription_start_site | - | 382070 | 382070 | -2767 | 32071 | AN8497 |
| 1672 | CONTIG153 | 386851 | 387220 | 1.15 | 3.34E-02 | transcription_start_site | - | 384629 | 384629 | -2406 | 32072 | AN8498 |
| 1672 | CONTIG153 | 386851 | 387220 | 1.15 | 3.34E-02 | transcription_start_site | - | 384375 | 384375 | -2660 | 32073 | AN8498 |
| 1672 | CONTIG153 | 386851 | 387220 | 1.15 | 3.34E-02 | transcription_start_site | - | 384140 | 384140 | -2895 | 32074 | AN8498 |
| 1672 | CONTIG153 | 386851 | 387220 | 1.15 | 3.34E-02 | transcription_start_site | - | 382738 | 382738 | -4297 | 32075 | AN8498 |
| 1672 | CONTIG153 | 386851 | 387220 | 1.15 | 3.34E-02 | transcription_start_site | - | 382631 | 382631 | -4404 | 32076 | AN8498 |
| 2150 | CONTIG153 | 384546 | 385128 | 0.83 | 7.38E-02 | transcription_start_site | - | 384629 | 384629 | -208  | 32072 | AN8498 |
| 2150 | CONTIG153 | 384546 | 385128 | 0.83 | 7.38E-02 | transcription_start_site | - | 384375 | 384375 | -462  | 32073 | AN8498 |
| 2150 | CONTIG153 | 384546 | 385128 | 0.83 | 7.38E-02 | transcription_start_site | - | 384140 | 384140 | -697  | 32074 | AN8498 |
| 2150 | CONTIG153 | 384546 | 385128 | 0.83 | 7.38E-02 | transcription_start_site | - | 382738 | 382738 | -2099 | 32075 | AN8498 |
| 2150 | CONTIG153 | 384546 | 385128 | 0.83 | 7.38E-02 | transcription_start_site | - | 382631 | 382631 | -2206 | 32076 | AN8498 |
| 1672 | CONTIG153 | 386851 | 387220 | 1.15 | 3.34E-02 | transcription_start_site | + | 387126 | 387126 | -90   | 32077 | AN8499 |
| 1672 | CONTIG153 | 386851 | 387220 | 1.15 | 3.34E-02 | transcription_start_site | + | 388872 | 388872 | -1836 | 32078 | AN8499 |
| 2150 | CONTIG153 | 384546 | 385128 | 0.83 | 7.38E-02 | transcription_start_site | + | 387126 | 387126 | -2289 | 32077 | AN8499 |
| 2150 | CONTIG153 | 384546 | 385128 | 0.83 | 7.38E-02 | transcription_start_site | + | 388872 | 388872 | -4035 | 32078 | AN8499 |
| 415  | CONTIG153 | 394881 | 395225 | 2.42 | 0.00E+00 | transcription_start_site | - | 390020 | 390020 | -5033 | 32079 | AN8500 |
| 1672 | CONTIG153 | 386851 | 387220 | 1.15 | 3.34E-02 | transcription_start_site | + | 391806 | 391806 | -4770 | 32080 | AN8501 |
| 1672 | CONTIG153 | 386851 | 387220 | 1.15 | 3.34E-02 | transcription_start_site | + | 392126 | 392126 | -5090 | 32081 | AN8501 |
| 415  | CONTIG153 | 394881 | 395225 | 2.42 | 0.00E+00 | transcription_start_site | + | 395676 | 395676 | -623  | 32086 | AN8502 |
| 415  | CONTIG153 | 394881 | 395225 | 2.42 | 0.00E+00 | transcription_start_site | + | 395900 | 395900 | -847  | 32087 | AN8502 |
| 415  | CONTIG153 | 394881 | 395225 | 2.42 | 0.00E+00 | transcription_start_site | + | 397789 | 397789 | -2736 | 32088 | AN8503 |
| 415  | CONTIG153 | 394881 | 395225 | 2.42 | 0.00E+00 | transcription_start_site | + | 398120 | 398120 | -3067 | 32089 | AN8503 |
| 1222 | CONTIG153 | 397212 | 397941 | 1.5  | 0.00E+00 | transcription_start_site | + | 397789 | 397789 | -212  | 32088 | AN8503 |
| 1222 | CONTIG153 | 397212 | 397941 | 1.5  | 0.00E+00 | transcription_start_site | + | 398120 | 398120 | -543  | 32089 | AN8503 |
| 587  | CONTIG154 | 3471   | 3743   | 2.21 | 1.25E-02 | transcription_start_site | + | 3925   | 3925   | -318  | 32093 | AN8505 |
| 587  | CONTIG154 | 3471   | 3743   | 2.21 | 1.25E-02 | transcription_start_site | + | 4398   | 4398   | -791  | 32094 | AN8505 |
| 587  | CONTIG154 | 3471   | 3743   | 2.21 | 1.25E-02 | transcription_start_site | + | 5559   | 5559   | -1952 | 32095 | AN8505 |
| 587  | CONTIG154 | 3471   | 3743   | 2.21 | 1.25E-02 | transcription_start_site | + | 6016   | 6016   | -2409 | 32096 | AN8505 |
| 94   | CONTIG154 | 21751  | 22040  | 3.1  | 3.81E-04 | transcription_start_site | - | 19291  | 19291  | -2604 | 32113 | AN8510 |
| 94   | CONTIG154 | 21751  | 22040  | 3.1  | 3.81E-04 | transcription_start_site | - | 19186  | 19186  | -2709 | 32114 | AN8510 |
| 94   | CONTIG154 | 21751  | 22040  | 3.1  | 3.81E-04 | transcription_start_site | - | 18492  | 18492  | -3403 | 32115 | AN8510 |
| 94   | CONTIG154 | 21751  | 22040  | 3.1  | 3.81E-04 | transcription_start_site | - | 18201  | 18201  | -3694 | 32116 | AN8510 |
| 94   | CONTIG154 | 21751  | 22040  | 3.1  | 3.81E-04 | transcription_start_site | - | 17909  | 17909  | -3986 | 32117 | AN8510 |
| 94   | CONTIG154 | 21751  | 22040  | 3.1  | 3.81E-04 | transcription_start_site | - | 17736  | 17736  | -4159 | 32118 | AN8510 |
| 94   | CONTIG154 | 21751  | 22040  | 3.1  | 3.81E-04 | transcription_start_site | + | 21125  | 21125  | 770   | 32122 | AN8511 |
| 94   | CONTIG154 | 21751  | 22040  | 3.1  | 3.81E-04 | transcription_start_site | + | 22395  | 22395  | -499  | 32123 | AN8512 |
| 94   | CONTIG154 | 21751  | 22040  | 3.1  | 3.81E-04 | transcription_start_site | + | 22513  | 22513  | -617  | 32124 | AN8512 |
| 94   | CONTIG154 | 21751  | 22040  | 3.1  | 3.81E-04 | transcription_start_site | + | 22872  | 22872  | -976  | 32125 | AN8512 |
| 1212 | CONTIG155 | 8946   | 9299   | 1.51 | 3.37E-03 | transcription_start_site | - | 4414   | 4414   | -4708 | 32153 | AN8520 |

|      |           |       |       |      |          |                          |   |       |       |       |       |        |
|------|-----------|-------|-------|------|----------|--------------------------|---|-------|-------|-------|-------|--------|
| 1212 | CONTIG155 | 8946  | 9299  | 1.51 | 3.37E-03 | transcription_start_site | - | 4335  | 4335  | -4787 | 32154 | AN8520 |
| 1212 | CONTIG155 | 8946  | 9299  | 1.51 | 3.37E-03 | transcription_start_site | - | 4182  | 4182  | -4940 | 32155 | AN8520 |
| 1212 | CONTIG155 | 8946  | 9299  | 1.51 | 3.37E-03 | transcription_start_site | - | 4100  | 4100  | -5022 | 32156 | AN8520 |
| 1212 | CONTIG155 | 8946  | 9299  | 1.51 | 3.37E-03 | transcription_start_site | - | 3954  | 3954  | -5168 | 32157 | AN8520 |
| 1212 | CONTIG155 | 8946  | 9299  | 1.51 | 3.37E-03 | transcription_start_site | - | 9166  | 9166  | 43    | 32162 | AN8522 |
| 1212 | CONTIG155 | 8946  | 9299  | 1.51 | 3.37E-03 | transcription_start_site | - | 8926  | 8926  | -196  | 32163 | AN8522 |
| 1212 | CONTIG155 | 8946  | 9299  | 1.51 | 3.37E-03 | transcription_start_site | + | 9593  | 9593  | -470  | 32164 | AN8523 |
| 1212 | CONTIG155 | 8946  | 9299  | 1.51 | 3.37E-03 | transcription_start_site | + | 13281 | 13281 | -4158 | 32165 | AN8524 |
| 1212 | CONTIG155 | 8946  | 9299  | 1.51 | 3.37E-03 | transcription_start_site | + | 13517 | 13517 | -4394 | 32166 | AN8524 |
| 1212 | CONTIG155 | 8946  | 9299  | 1.51 | 3.37E-03 | transcription_start_site | + | 14006 | 14006 | -4883 | 32167 | AN8524 |
| 1212 | CONTIG155 | 8946  | 9299  | 1.51 | 3.37E-03 | transcription_start_site | + | 14193 | 14193 | -5070 | 32168 | AN8524 |
| 1303 | CONTIG155 | 40203 | 40492 | 1.43 | 5.08E-03 | transcription_start_site | - | 36601 | 36601 | -3746 | 32190 | AN8533 |
| 1303 | CONTIG155 | 40203 | 40492 | 1.43 | 5.08E-03 | transcription_start_site | - | 36409 | 36409 | -3938 | 32191 | AN8533 |
| 176  | CONTIG156 | 76    | 445   | 2.89 | 2.32E-03 | transcription_start_site | + | 470   | 470   | -209  | 32192 | AN8534 |
| 176  | CONTIG156 | 76    | 445   | 2.89 | 2.32E-03 | transcription_start_site | + | 661   | 661   | -400  | 32193 | AN8534 |
| 176  | CONTIG156 | 76    | 445   | 2.89 | 2.32E-03 | transcription_start_site | + | 840   | 840   | -579  | 32194 | AN8534 |
| 176  | CONTIG156 | 76    | 445   | 2.89 | 2.32E-03 | transcription_start_site | + | 1704  | 1704  | -1443 | 32195 | AN8534 |
| 176  | CONTIG156 | 76    | 445   | 2.89 | 2.32E-03 | transcription_start_site | + | 1855  | 1855  | -1594 | 32196 | AN8534 |
| 176  | CONTIG156 | 76    | 445   | 2.89 | 2.32E-03 | transcription_start_site | + | 4204  | 4204  | -3943 | 32197 | AN8535 |
| 176  | CONTIG156 | 76    | 445   | 2.89 | 2.32E-03 | transcription_start_site | + | 4376  | 4376  | -4115 | 32198 | AN8535 |
| 176  | CONTIG156 | 76    | 445   | 2.89 | 2.32E-03 | transcription_start_site | + | 4976  | 4976  | -4715 | 32199 | AN8535 |
| 176  | CONTIG156 | 76    | 445   | 2.89 | 2.32E-03 | transcription_start_site | + | 5148  | 5148  | -4887 | 32200 | AN8535 |
| 176  | CONTIG156 | 76    | 445   | 2.89 | 2.32E-03 | transcription_start_site | + | 5342  | 5342  | -5081 | 32201 | AN8535 |
| 1498 | CONTIG156 | 7726  | 8085  | 1.28 | 1.54E-01 | transcription_start_site | - | 7856  | 7856  | -49   | 32204 | AN8536 |
| 1498 | CONTIG156 | 7726  | 8085  | 1.28 | 1.54E-01 | transcription_start_site | - | 7971  | 7971  | 65    | 32203 | AN8536 |
| 1498 | CONTIG156 | 7726  | 8085  | 1.28 | 1.54E-01 | transcription_start_site | - | 7762  | 7762  | -143  | 32205 | AN8536 |
| 1498 | CONTIG156 | 7726  | 8085  | 1.28 | 1.54E-01 | transcription_start_site | - | 7686  | 7686  | -219  | 32206 | AN8536 |
| 1498 | CONTIG156 | 7726  | 8085  | 1.28 | 1.54E-01 | transcription_start_site | - | 7482  | 7482  | -423  | 32207 | AN8536 |
| 1498 | CONTIG156 | 7726  | 8085  | 1.28 | 1.54E-01 | transcription_start_site | - | 7150  | 7150  | -755  | 32208 | AN8536 |
| 1498 | CONTIG156 | 7726  | 8085  | 1.28 | 1.54E-01 | transcription_start_site | - | 6733  | 6733  | -1172 | 32209 | AN8536 |
| 1498 | CONTIG156 | 7726  | 8085  | 1.28 | 1.54E-01 | transcription_start_site | - | 6635  | 6635  | -1270 | 32210 | AN8536 |
| 1498 | CONTIG156 | 7726  | 8085  | 1.28 | 1.54E-01 | transcription_start_site | + | 8837  | 8837  | -931  | 32211 | AN8537 |
| 1498 | CONTIG156 | 7726  | 8085  | 1.28 | 1.54E-01 | transcription_start_site | + | 9514  | 9514  | -1608 | 32212 | AN8537 |
| 1498 | CONTIG156 | 7726  | 8085  | 1.28 | 1.54E-01 | transcription_start_site | + | 9900  | 9900  | -1994 | 32213 | AN8537 |
| 1498 | CONTIG156 | 7726  | 8085  | 1.28 | 1.54E-01 | transcription_start_site | + | 10291 | 10291 | -2385 | 32214 | AN8537 |
| 1498 | CONTIG156 | 7726  | 8085  | 1.28 | 1.54E-01 | transcription_start_site | + | 10483 | 10483 | -2577 | 32215 | AN8537 |
| 1498 | CONTIG156 | 7726  | 8085  | 1.28 | 1.54E-01 | transcription_start_site | + | 10642 | 10642 | -2736 | 32216 | AN8537 |
| 1442 | CONTIG157 | 5784  | 6128  | 1.31 | 2.63E-02 | transcription_start_site | + | 8870  | 8870  | -2914 | 32221 | AN8540 |
| 1442 | CONTIG157 | 5784  | 6128  | 1.31 | 2.63E-02 | transcription_start_site | + | 9213  | 9213  | -3257 | 32222 | AN8540 |
| 1442 | CONTIG157 | 5784  | 6128  | 1.31 | 2.63E-02 | transcription_start_site | + | 9556  | 9556  | -3600 | 32223 | AN8540 |
| 1442 | CONTIG157 | 5784  | 6128  | 1.31 | 2.63E-02 | transcription_start_site | + | 9903  | 9903  | -3947 | 32224 | AN8540 |
| 833  | CONTIG157 | 33166 | 33502 | 1.89 | 2.32E-03 | transcription_start_site | - | 31946 | 31946 | -1388 | 32242 | AN8547 |
| 833  | CONTIG157 | 33166 | 33502 | 1.89 | 2.32E-03 | transcription_start_site | - | 31832 | 31832 | -1502 | 32243 | AN8547 |
| 833  | CONTIG157 | 33166 | 33502 | 1.89 | 2.32E-03 | transcription_start_site | - | 31427 | 31427 | -1907 | 32244 | AN8547 |
| 833  | CONTIG157 | 33166 | 33502 | 1.89 | 2.32E-03 | transcription_start_site | - | 30803 | 30803 | -2531 | 32245 | AN8547 |
| 833  | CONTIG157 | 33166 | 33502 | 1.89 | 2.32E-03 | transcription_start_site | - | 30128 | 30128 | -3206 | 32246 | AN8547 |
| 833  | CONTIG157 | 33166 | 33502 | 1.89 | 2.32E-03 | transcription_start_site | + | 34000 | 34000 | -666  | 32247 | AN8548 |
| 833  | CONTIG157 | 33166 | 33502 | 1.89 | 2.32E-03 | transcription_start_site | + | 34223 | 34223 | -889  | 32248 | AN8548 |
| 833  | CONTIG157 | 33166 | 33502 | 1.89 | 2.32E-03 | transcription_start_site | + | 34479 | 34479 | -1145 | 32249 | AN8548 |
| 833  | CONTIG157 | 33166 | 33502 | 1.89 | 2.32E-03 | transcription_start_site | + | 34668 | 34668 | -1334 | 32250 | AN8548 |
| 833  | CONTIG157 | 33166 | 33502 | 1.89 | 2.32E-03 | transcription_start_site | + | 34782 | 34782 | -1448 | 32251 | AN8548 |
| 833  | CONTIG157 | 33166 | 33502 | 1.89 | 2.32E-03 | transcription_start_site | + | 34912 | 34912 | -1578 | 32252 | AN8548 |
| 833  | CONTIG157 | 33166 | 33502 | 1.89 | 2.32E-03 | transcription_start_site | + | 35110 | 35110 | -1776 | 32253 | AN8548 |
| 279  | CONTIG157 | 39009 | 39294 | 2.66 | 0.00E+00 | transcription_start_site | + | 39766 | 39766 | -614  | 32254 | AN8549 |
| 437  | CONTIG157 | 51542 | 51893 | 2.4  | 0.00E+00 | transcription_start_site | - | 47722 | 47722 | -3995 | 32259 | AN8551 |
| 437  | CONTIG157 | 51542 | 51893 | 2.4  | 0.00E+00 | transcription_start_site | - | 47562 | 47562 | -4155 | 32260 | AN8551 |
| 437  | CONTIG157 | 51542 | 51893 | 2.4  | 0.00E+00 | transcription_start_site | + | 51885 | 51885 | -167  | 32265 | AN8553 |



|      |           |        |        |      |          |                          |   |        |        |       |       |        |
|------|-----------|--------|--------|------|----------|--------------------------|---|--------|--------|-------|-------|--------|
| 437  | CONTIG157 | 51542  | 51893  | 2.4  | 0.00E+00 | transcription_start_site | + | 52224  | 52224  | -506  | 32266 | AN8553 |
| 437  | CONTIG157 | 51542  | 51893  | 2.4  | 0.00E+00 | transcription_start_site | + | 52358  | 52358  | -640  | 32267 | AN8553 |
| 437  | CONTIG157 | 51542  | 51893  | 2.4  | 0.00E+00 | transcription_start_site | + | 52476  | 52476  | -758  | 32268 | AN8553 |
| 437  | CONTIG157 | 51542  | 51893  | 2.4  | 0.00E+00 | transcription_start_site | + | 52688  | 52688  | -970  | 32269 | AN8553 |
| 437  | CONTIG157 | 51542  | 51893  | 2.4  | 0.00E+00 | transcription_start_site | + | 52861  | 52861  | -1143 | 32270 | AN8553 |
| 437  | CONTIG157 | 51542  | 51893  | 2.4  | 0.00E+00 | transcription_start_site | + | 52996  | 52996  | -1278 | 32271 | AN8553 |
| 437  | CONTIG157 | 51542  | 51893  | 2.4  | 0.00E+00 | transcription_start_site | + | 53311  | 53311  | -1593 | 32272 | AN8553 |
| 437  | CONTIG157 | 51542  | 51893  | 2.4  | 0.00E+00 | transcription_start_site | + | 53557  | 53557  | -1839 | 32273 | AN8553 |
| 2230 | CONTIG157 | 64670  | 65103  | 0.77 | 1.97E-01 | transcription_start_site | - | 64320  | 64320  | -566  | 32288 | AN8557 |
| 2230 | CONTIG157 | 64670  | 65103  | 0.77 | 1.97E-01 | transcription_start_site | - | 63837  | 63837  | -1049 | 32289 | AN8557 |
| 2230 | CONTIG157 | 64670  | 65103  | 0.77 | 1.97E-01 | transcription_start_site | - | 63408  | 63408  | -1478 | 32290 | AN8557 |
| 2230 | CONTIG157 | 64670  | 65103  | 0.77 | 1.97E-01 | transcription_start_site | - | 62708  | 62708  | -2178 | 32291 | AN8557 |
| 2230 | CONTIG157 | 64670  | 65103  | 0.77 | 1.97E-01 | transcription_start_site | + | 65277  | 65277  | -390  | 32292 | AN8558 |
| 2230 | CONTIG157 | 64670  | 65103  | 0.77 | 1.97E-01 | transcription_start_site | + | 65804  | 65804  | -917  | 32293 | AN8558 |
| 644  | CONTIG157 | 90086  | 90440  | 2.11 | 3.81E-04 | transcription_start_site | - | 85398  | 85398  | -4865 | 32308 | AN8563 |
| 644  | CONTIG157 | 90086  | 90440  | 2.11 | 3.81E-04 | transcription_start_site | - | 87561  | 87561  | -2702 | 32310 | AN8564 |
| 2231 | CONTIG157 | 91201  | 92395  | 0.77 | 1.97E-01 | transcription_start_site | - | 87561  | 87561  | -4237 | 32310 | AN8564 |
| 644  | CONTIG157 | 90086  | 90440  | 2.11 | 3.81E-04 | transcription_start_site | - | 89857  | 89857  | -406  | 32311 | AN8565 |
| 2231 | CONTIG157 | 91201  | 92395  | 0.77 | 1.97E-01 | transcription_start_site | - | 89857  | 89857  | -1941 | 32311 | AN8565 |
| 644  | CONTIG157 | 90086  | 90440  | 2.11 | 3.81E-04 | transcription_start_site | + | 90507  | 90507  | -244  | 32312 | AN8566 |
| 644  | CONTIG157 | 90086  | 90440  | 2.11 | 3.81E-04 | transcription_start_site | + | 90816  | 90816  | -553  | 32313 | AN8566 |
| 2231 | CONTIG157 | 91201  | 92395  | 0.77 | 1.97E-01 | transcription_start_site | + | 90816  | 90816  | 982   | 32313 | AN8566 |
| 2231 | CONTIG157 | 91201  | 92395  | 0.77 | 1.97E-01 | transcription_start_site | + | 90507  | 90507  | 1291  | 32312 | AN8566 |
| 2231 | CONTIG157 | 91201  | 92395  | 0.77 | 1.97E-01 | transcription_start_site | + | 97290  | 97290  | -5492 | 32314 | AN8567 |
| 2231 | CONTIG157 | 91201  | 92395  | 0.77 | 1.97E-01 | transcription_start_site | + | 97393  | 97393  | -5595 | 32315 | AN8567 |
| 1108 | CONTIG157 | 99921  | 100175 | 1.6  | 9.32E-03 | transcription_start_site | + | 100174 | 100174 | -126  | 32318 | AN8568 |
| 1108 | CONTIG157 | 99921  | 100175 | 1.6  | 9.32E-03 | transcription_start_site | + | 100757 | 100757 | -709  | 32319 | AN8568 |
| 1108 | CONTIG157 | 99921  | 100175 | 1.6  | 9.32E-03 | transcription_start_site | + | 103333 | 103333 | -3285 | 32322 | AN8570 |
| 1108 | CONTIG157 | 99921  | 100175 | 1.6  | 9.32E-03 | transcription_start_site | + | 103570 | 103570 | -3522 | 32323 | AN8570 |
| 1108 | CONTIG157 | 99921  | 100175 | 1.6  | 9.32E-03 | transcription_start_site | + | 104274 | 104274 | -4226 | 32324 | AN8570 |
| 1108 | CONTIG157 | 99921  | 100175 | 1.6  | 9.32E-03 | transcription_start_site | + | 104449 | 104449 | -4401 | 32325 | AN8570 |
| 2155 | CONTIG157 | 120004 | 120362 | 0.83 | 1.54E-01 | transcription_start_site | - | 119198 | 119198 | -985  | 32344 | AN8575 |
| 2155 | CONTIG157 | 120004 | 120362 | 0.83 | 1.54E-01 | transcription_start_site | - | 119117 | 119117 | -1066 | 32345 | AN8575 |
| 2155 | CONTIG157 | 120004 | 120362 | 0.83 | 1.54E-01 | transcription_start_site | - | 118940 | 118940 | -1243 | 32346 | AN8575 |
| 2155 | CONTIG157 | 120004 | 120362 | 0.83 | 1.54E-01 | transcription_start_site | - | 118666 | 118666 | -1517 | 32347 | AN8575 |
| 2155 | CONTIG157 | 120004 | 120362 | 0.83 | 1.54E-01 | transcription_start_site | - | 118413 | 118413 | -1770 | 32348 | AN8575 |
| 2155 | CONTIG157 | 120004 | 120362 | 0.83 | 1.54E-01 | transcription_start_site | - | 118184 | 118184 | -1999 | 32349 | AN8575 |
| 2155 | CONTIG157 | 120004 | 120362 | 0.83 | 1.54E-01 | transcription_start_site | - | 117959 | 117959 | -2224 | 32350 | AN8575 |
| 2155 | CONTIG157 | 120004 | 120362 | 0.83 | 1.54E-01 | transcription_start_site | - | 117687 | 117687 | -2496 | 32351 | AN8575 |
| 2155 | CONTIG157 | 120004 | 120362 | 0.83 | 1.54E-01 | transcription_start_site | - | 117436 | 117436 | -2747 | 32352 | AN8575 |
| 2155 | CONTIG157 | 120004 | 120362 | 0.83 | 1.54E-01 | transcription_start_site | - | 117186 | 117186 | -2997 | 32353 | AN8575 |
| 2155 | CONTIG157 | 120004 | 120362 | 0.83 | 1.54E-01 | transcription_start_site | - | 117090 | 117090 | -3093 | 32354 | AN8575 |
| 2155 | CONTIG157 | 120004 | 120362 | 0.83 | 1.54E-01 | transcription_start_site | - | 116717 | 116717 | -3466 | 32355 | AN8575 |
| 2155 | CONTIG157 | 120004 | 120362 | 0.83 | 1.54E-01 | transcription_start_site | + | 120875 | 120875 | -692  | 32356 | AN8576 |
| 2155 | CONTIG157 | 120004 | 120362 | 0.83 | 1.54E-01 | transcription_start_site | + | 121531 | 121531 | -1348 | 32357 | AN8576 |
| 2155 | CONTIG157 | 120004 | 120362 | 0.83 | 1.54E-01 | transcription_start_site | + | 121769 | 121769 | -1586 | 32358 | AN8576 |
| 2155 | CONTIG157 | 120004 | 120362 | 0.83 | 1.54E-01 | transcription_start_site | + | 123185 | 123185 | -3002 | 32359 | AN8576 |
| 2155 | CONTIG157 | 120004 | 120362 | 0.83 | 1.54E-01 | transcription_start_site | + | 123745 | 123745 | -3562 | 32360 | AN8576 |
| 2155 | CONTIG157 | 120004 | 120362 | 0.83 | 1.54E-01 | transcription_start_site | + | 123863 | 123863 | -3680 | 32361 | AN8576 |
| 2155 | CONTIG157 | 120004 | 120362 | 0.83 | 1.54E-01 | transcription_start_site | + | 124286 | 124286 | -4103 | 32362 | AN8576 |
| 2155 | CONTIG157 | 120004 | 120362 | 0.83 | 1.54E-01 | transcription_start_site | + | 124676 | 124676 | -4493 | 32363 | AN8576 |
| 1081 | CONTIG157 | 130442 | 130723 | 1.63 | 7.70E-03 | transcription_start_site | + | 131046 | 131046 | -463  | 32365 | AN8577 |
| 1081 | CONTIG157 | 130442 | 130723 | 1.63 | 7.70E-03 | transcription_start_site | + | 131539 | 131539 | -956  | 32366 | AN8577 |
| 1081 | CONTIG157 | 130442 | 130723 | 1.63 | 7.70E-03 | transcription_start_site | + | 131768 | 131768 | -1185 | 32367 | AN8577 |
| 1081 | CONTIG157 | 130442 | 130723 | 1.63 | 7.70E-03 | transcription_start_site | + | 132184 | 132184 | -1601 | 32368 | AN8577 |
| 1081 | CONTIG157 | 130442 | 130723 | 1.63 | 7.70E-03 | transcription_start_site | + | 132633 | 132633 | -2050 | 32369 | AN8577 |
| 1081 | CONTIG157 | 130442 | 130723 | 1.63 | 7.70E-03 | transcription_start_site | + | 132784 | 132784 | -2201 | 32370 | AN8577 |

|      |           |        |        |      |          |                          |   |        |        |       |       |        |
|------|-----------|--------|--------|------|----------|--------------------------|---|--------|--------|-------|-------|--------|
| 1081 | CONTIG157 | 130442 | 130723 | 1.63 | 7.70E-03 | transcription_start_site | + | 132985 | 132985 | -2402 | 32371 | AN8577 |
| 1081 | CONTIG157 | 130442 | 130723 | 1.63 | 7.70E-03 | transcription_start_site | + | 133266 | 133266 | -2683 | 32372 | AN8577 |
| 1081 | CONTIG157 | 130442 | 130723 | 1.63 | 7.70E-03 | transcription_start_site | + | 133587 | 133587 | -3004 | 32373 | AN8577 |
| 1081 | CONTIG157 | 130442 | 130723 | 1.63 | 7.70E-03 | transcription_start_site | + | 133959 | 133959 | -3376 | 32374 | AN8577 |
| 83   | CONTIG158 | 39380  | 39819  | 3.14 | 2.06E-04 | transcription_start_site | - | 36555  | 36555  | -3044 | 32403 | AN8588 |
| 83   | CONTIG158 | 39380  | 39819  | 3.14 | 2.06E-04 | transcription_start_site | - | 36507  | 36507  | -3092 | 32404 | AN8588 |
| 83   | CONTIG158 | 39380  | 39819  | 3.14 | 2.06E-04 | transcription_start_site | - | 36240  | 36240  | -3359 | 32405 | AN8588 |
| 83   | CONTIG158 | 39380  | 39819  | 3.14 | 2.06E-04 | transcription_start_site | - | 35589  | 35589  | -4010 | 32406 | AN8588 |
| 83   | CONTIG158 | 39380  | 39819  | 3.14 | 2.06E-04 | transcription_start_site | - | 35505  | 35505  | -4094 | 32407 | AN8588 |
| 83   | CONTIG158 | 39380  | 39819  | 3.14 | 2.06E-04 | transcription_start_site | - | 35262  | 35262  | -4337 | 32408 | AN8588 |
| 2281 | CONTIG158 | 40741  | 42145  | 0.7  | 1.64E-01 | transcription_start_site | - | 36555  | 36555  | -4888 | 32403 | AN8588 |
| 2281 | CONTIG158 | 40741  | 42145  | 0.7  | 1.64E-01 | transcription_start_site | - | 36507  | 36507  | -4936 | 32404 | AN8588 |
| 2281 | CONTIG158 | 40741  | 42145  | 0.7  | 1.64E-01 | transcription_start_site | - | 36240  | 36240  | -5203 | 32405 | AN8588 |
| 83   | CONTIG158 | 39380  | 39819  | 3.14 | 2.06E-04 | transcription_start_site | + | 40301  | 40301  | -701  | 32415 | AN8590 |
| 83   | CONTIG158 | 39380  | 39819  | 3.14 | 2.06E-04 | transcription_start_site | + | 41337  | 41337  | -1737 | 32416 | AN8590 |
| 2281 | CONTIG158 | 40741  | 42145  | 0.7  | 1.64E-01 | transcription_start_site | + | 41337  | 41337  | 106   | 32416 | AN8590 |
| 2281 | CONTIG158 | 40741  | 42145  | 0.7  | 1.64E-01 | transcription_start_site | + | 40301  | 40301  | 1142  | 32415 | AN8590 |
| 1529 | CONTIG158 | 44857  | 45211  | 1.26 | 1.38E-01 | transcription_start_site | - | 44699  | 44699  | -335  | 32417 | AN8591 |
| 1529 | CONTIG158 | 44857  | 45211  | 1.26 | 1.38E-01 | transcription_start_site | - | 44091  | 44091  | -943  | 32418 | AN8591 |
| 1529 | CONTIG158 | 44857  | 45211  | 1.26 | 1.38E-01 | transcription_start_site | - | 43645  | 43645  | -1389 | 32419 | AN8591 |
| 1529 | CONTIG158 | 44857  | 45211  | 1.26 | 1.38E-01 | transcription_start_site | - | 43493  | 43493  | -1541 | 32420 | AN8591 |
| 1529 | CONTIG158 | 44857  | 45211  | 1.26 | 1.38E-01 | transcription_start_site | + | 45222  | 45222  | -188  | 32421 | AN8592 |
| 1529 | CONTIG158 | 44857  | 45211  | 1.26 | 1.38E-01 | transcription_start_site | + | 45516  | 45516  | -482  | 32422 | AN8592 |
| 1529 | CONTIG158 | 44857  | 45211  | 1.26 | 1.38E-01 | transcription_start_site | + | 46004  | 46004  | -970  | 32423 | AN8592 |
| 1529 | CONTIG158 | 44857  | 45211  | 1.26 | 1.38E-01 | transcription_start_site | + | 46290  | 46290  | -1256 | 32424 | AN8592 |
| 1529 | CONTIG158 | 44857  | 45211  | 1.26 | 1.38E-01 | transcription_start_site | + | 46375  | 46375  | -1341 | 32425 | AN8592 |
| 2281 | CONTIG158 | 40741  | 42145  | 0.7  | 1.64E-01 | transcription_start_site | + | 45222  | 45222  | -3779 | 32421 | AN8592 |
| 2281 | CONTIG158 | 40741  | 42145  | 0.7  | 1.64E-01 | transcription_start_site | + | 45516  | 45516  | -4073 | 32422 | AN8592 |
| 2281 | CONTIG158 | 40741  | 42145  | 0.7  | 1.64E-01 | transcription_start_site | + | 46004  | 46004  | -4561 | 32423 | AN8592 |
| 2281 | CONTIG158 | 40741  | 42145  | 0.7  | 1.64E-01 | transcription_start_site | + | 46290  | 46290  | -4847 | 32424 | AN8592 |
| 2281 | CONTIG158 | 40741  | 42145  | 0.7  | 1.64E-01 | transcription_start_site | + | 46375  | 46375  | -4932 | 32425 | AN8592 |
| 1235 | CONTIG158 | 54387  | 54738  | 1.5  | 7.66E-02 | transcription_start_site | - | 49470  | 49470  | -5092 | 32426 | AN8593 |
| 1791 | CONTIG158 | 51527  | 52486  | 1.08 | 1.23E-01 | transcription_start_site | - | 49470  | 49470  | -2536 | 32426 | AN8593 |
| 1791 | CONTIG158 | 51527  | 52486  | 1.08 | 1.23E-01 | transcription_start_site | - | 49066  | 49066  | -2940 | 32427 | AN8593 |
| 1791 | CONTIG158 | 51527  | 52486  | 1.08 | 1.23E-01 | transcription_start_site | - | 48771  | 48771  | -3235 | 32428 | AN8593 |
| 1235 | CONTIG158 | 54387  | 54738  | 1.5  | 7.66E-02 | transcription_start_site | + | 54618  | 54618  | -55   | 32431 | AN8595 |
| 1235 | CONTIG158 | 54387  | 54738  | 1.5  | 7.66E-02 | transcription_start_site | + | 54434  | 54434  | 128   | 32430 | AN8595 |
| 1235 | CONTIG158 | 54387  | 54738  | 1.5  | 7.66E-02 | transcription_start_site | + | 54954  | 54954  | -391  | 32432 | AN8595 |
| 1235 | CONTIG158 | 54387  | 54738  | 1.5  | 7.66E-02 | transcription_start_site | + | 54148  | 54148  | 414   | 32429 | AN8595 |
| 1235 | CONTIG158 | 54387  | 54738  | 1.5  | 7.66E-02 | transcription_start_site | + | 55221  | 55221  | -658  | 32433 | AN8595 |
| 1235 | CONTIG158 | 54387  | 54738  | 1.5  | 7.66E-02 | transcription_start_site | + | 55777  | 55777  | -1214 | 32434 | AN8595 |
| 1791 | CONTIG158 | 51527  | 52486  | 1.08 | 1.23E-01 | transcription_start_site | + | 54148  | 54148  | -2141 | 32429 | AN8595 |
| 1791 | CONTIG158 | 51527  | 52486  | 1.08 | 1.23E-01 | transcription_start_site | + | 54434  | 54434  | -2427 | 32430 | AN8595 |
| 1791 | CONTIG158 | 51527  | 52486  | 1.08 | 1.23E-01 | transcription_start_site | + | 54618  | 54618  | -2611 | 32431 | AN8595 |
| 1791 | CONTIG158 | 51527  | 52486  | 1.08 | 1.23E-01 | transcription_start_site | + | 54954  | 54954  | -2947 | 32432 | AN8595 |
| 1791 | CONTIG158 | 51527  | 52486  | 1.08 | 1.23E-01 | transcription_start_site | + | 55221  | 55221  | -3214 | 32433 | AN8595 |
| 1791 | CONTIG158 | 51527  | 52486  | 1.08 | 1.23E-01 | transcription_start_site | + | 55777  | 55777  | -3770 | 32434 | AN8595 |
| 1235 | CONTIG158 | 54387  | 54738  | 1.5  | 7.66E-02 | transcription_start_site | + | 58695  | 58695  | -4132 | 32439 | AN8597 |
| 1235 | CONTIG158 | 54387  | 54738  | 1.5  | 7.66E-02 | transcription_start_site | + | 58892  | 58892  | -4329 | 32440 | AN8597 |
| 1235 | CONTIG158 | 54387  | 54738  | 1.5  | 7.66E-02 | transcription_start_site | + | 59047  | 59047  | -4484 | 32441 | AN8597 |
| 1235 | CONTIG158 | 54387  | 54738  | 1.5  | 7.66E-02 | transcription_start_site | + | 59195  | 59195  | -4632 | 32442 | AN8597 |
| 744  | CONTIG158 | 75902  | 76257  | 2.01 | 2.05E-02 | transcription_start_site | - | 75920  | 75920  | -159  | 32451 | AN8603 |
| 744  | CONTIG158 | 75902  | 76257  | 2.01 | 2.05E-02 | transcription_start_site | - | 77099  | 77099  | 1019  | 32450 | AN8603 |
| 778  | CONTIG158 | 76957  | 77391  | 1.97 | 2.29E-02 | transcription_start_site | - | 77099  | 77099  | -75   | 32450 | AN8603 |
| 778  | CONTIG158 | 76957  | 77391  | 1.97 | 2.29E-02 | transcription_start_site | - | 77285  | 77285  | 111   | 32449 | AN8603 |
| 778  | CONTIG158 | 76957  | 77391  | 1.97 | 2.29E-02 | transcription_start_site | - | 75920  | 75920  | -1254 | 32451 | AN8603 |
| 355  | CONTIG158 | 86344  | 87058  | 2.53 | 2.65E-03 | transcription_start_site | - | 85834  | 85834  | -867  | 32459 | AN8607 |

|      |           |        |        |      |          |                          |   |        |        |       |       |        |
|------|-----------|--------|--------|------|----------|--------------------------|---|--------|--------|-------|-------|--------|
| 355  | CONTIG158 | 86344  | 87058  | 2.53 | 2.65E-03 | transcription_start_site | - | 85094  | 85094  | -1607 | 32460 | AN8607 |
| 355  | CONTIG158 | 86344  | 87058  | 2.53 | 2.65E-03 | transcription_start_site | + | 89084  | 89084  | -2383 | 32461 | AN8608 |
| 355  | CONTIG158 | 86344  | 87058  | 2.53 | 2.65E-03 | transcription_start_site | + | 89225  | 89225  | -2524 | 32462 | AN8608 |
| 355  | CONTIG158 | 86344  | 87058  | 2.53 | 2.65E-03 | transcription_start_site | + | 89500  | 89500  | -2799 | 32463 | AN8608 |
| 652  | CONTIG158 | 144677 | 144966 | 2.11 | 1.54E-02 | transcription_start_site | - | 143344 | 143344 | -1477 | 32523 | AN8627 |
| 1236 | CONTIG158 | 143403 | 143686 | 1.5  | 7.66E-02 | transcription_start_site | - | 143344 | 143344 | -200  | 32523 | AN8627 |
| 652  | CONTIG158 | 144677 | 144966 | 2.11 | 1.54E-02 | transcription_start_site | - | 144613 | 144613 | -208  | 32524 | AN8628 |
| 1236 | CONTIG158 | 143403 | 143686 | 1.5  | 7.66E-02 | transcription_start_site | - | 144613 | 144613 | 1068  | 32524 | AN8628 |
| 779  | CONTIG158 | 169127 | 169479 | 1.97 | 2.29E-02 | transcription_start_site | - | 168850 | 168850 | -453  | 32548 | AN8636 |
| 779  | CONTIG158 | 169127 | 169479 | 1.97 | 2.29E-02 | transcription_start_site | - | 168584 | 168584 | -719  | 32549 | AN8636 |
| 779  | CONTIG158 | 169127 | 169479 | 1.97 | 2.29E-02 | transcription_start_site | - | 167992 | 167992 | -1311 | 32550 | AN8636 |
| 779  | CONTIG158 | 169127 | 169479 | 1.97 | 2.29E-02 | transcription_start_site | - | 167782 | 167782 | -1521 | 32551 | AN8636 |
| 779  | CONTIG158 | 169127 | 169479 | 1.97 | 2.29E-02 | transcription_start_site | - | 167563 | 167563 | -1740 | 32552 | AN8636 |
| 779  | CONTIG158 | 169127 | 169479 | 1.97 | 2.29E-02 | transcription_start_site | - | 167170 | 167170 | -2133 | 32553 | AN8636 |
| 941  | CONTIG158 | 174614 | 174968 | 1.78 | 3.70E-02 | transcription_start_site | - | 174550 | 174550 | -241  | 32554 | AN8637 |
| 941  | CONTIG158 | 174614 | 174968 | 1.78 | 3.70E-02 | transcription_start_site | - | 173954 | 173954 | -837  | 32555 | AN8637 |
| 991  | CONTIG158 | 178519 | 178941 | 1.73 | 2.07E-02 | transcription_start_site | - | 174550 | 174550 | -4180 | 32554 | AN8637 |
| 991  | CONTIG158 | 178519 | 178941 | 1.73 | 2.07E-02 | transcription_start_site | - | 173954 | 173954 | -4776 | 32555 | AN8637 |
| 941  | CONTIG158 | 174614 | 174968 | 1.78 | 3.70E-02 | transcription_start_site | + | 175148 | 175148 | -357  | 32556 | AN8638 |
| 941  | CONTIG158 | 174614 | 174968 | 1.78 | 3.70E-02 | transcription_start_site | + | 175536 | 175536 | -745  | 32557 | AN8638 |
| 380  | CONTIG158 | 181659 | 182102 | 2.48 | 2.49E-03 | transcription_start_site | - | 178347 | 178347 | -3533 | 32558 | AN8639 |
| 380  | CONTIG158 | 181659 | 182102 | 2.48 | 2.49E-03 | transcription_start_site | - | 178000 | 178000 | -3880 | 32559 | AN8639 |
| 380  | CONTIG158 | 181659 | 182102 | 2.48 | 2.49E-03 | transcription_start_site | - | 177185 | 177185 | -4695 | 32560 | AN8639 |
| 897  | CONTIG158 | 180079 | 180653 | 1.83 | 4.78E-03 | transcription_start_site | - | 178347 | 178347 | -2019 | 32558 | AN8639 |
| 897  | CONTIG158 | 180079 | 180653 | 1.83 | 4.78E-03 | transcription_start_site | - | 178000 | 178000 | -2366 | 32559 | AN8639 |
| 897  | CONTIG158 | 180079 | 180653 | 1.83 | 4.78E-03 | transcription_start_site | - | 177185 | 177185 | -3181 | 32560 | AN8639 |
| 991  | CONTIG158 | 178519 | 178941 | 1.73 | 2.07E-02 | transcription_start_site | - | 178347 | 178347 | -383  | 32558 | AN8639 |
| 991  | CONTIG158 | 178519 | 178941 | 1.73 | 2.07E-02 | transcription_start_site | - | 178000 | 178000 | -730  | 32559 | AN8639 |
| 991  | CONTIG158 | 178519 | 178941 | 1.73 | 2.07E-02 | transcription_start_site | - | 177185 | 177185 | -1545 | 32560 | AN8639 |
| 897  | CONTIG158 | 180079 | 180653 | 1.83 | 4.78E-03 | transcription_start_site | + | 179329 | 179329 | 1037  | 32563 | AN8640 |
| 897  | CONTIG158 | 180079 | 180653 | 1.83 | 4.78E-03 | transcription_start_site | + | 179113 | 179113 | 1253  | 32562 | AN8640 |
| 941  | CONTIG158 | 174614 | 174968 | 1.78 | 3.70E-02 | transcription_start_site | + | 179014 | 179014 | -4223 | 32561 | AN8640 |
| 941  | CONTIG158 | 174614 | 174968 | 1.78 | 3.70E-02 | transcription_start_site | + | 179113 | 179113 | -4322 | 32562 | AN8640 |
| 941  | CONTIG158 | 174614 | 174968 | 1.78 | 3.70E-02 | transcription_start_site | + | 179329 | 179329 | -4538 | 32563 | AN8640 |
| 991  | CONTIG158 | 178519 | 178941 | 1.73 | 2.07E-02 | transcription_start_site | + | 179014 | 179014 | -284  | 32561 | AN8640 |
| 991  | CONTIG158 | 178519 | 178941 | 1.73 | 2.07E-02 | transcription_start_site | + | 179113 | 179113 | -383  | 32562 | AN8640 |
| 991  | CONTIG158 | 178519 | 178941 | 1.73 | 2.07E-02 | transcription_start_site | + | 179329 | 179329 | -599  | 32563 | AN8640 |
| 897  | CONTIG158 | 180079 | 180653 | 1.83 | 4.78E-03 | transcription_start_site | + | 179901 | 179901 | 465   | 32565 | AN8641 |
| 897  | CONTIG158 | 180079 | 180653 | 1.83 | 4.78E-03 | transcription_start_site | + | 179726 | 179726 | 640   | 32564 | AN8641 |
| 941  | CONTIG158 | 174614 | 174968 | 1.78 | 3.70E-02 | transcription_start_site | + | 179726 | 179726 | -4935 | 32564 | AN8641 |
| 941  | CONTIG158 | 174614 | 174968 | 1.78 | 3.70E-02 | transcription_start_site | + | 179901 | 179901 | -5110 | 32565 | AN8641 |
| 991  | CONTIG158 | 178519 | 178941 | 1.73 | 2.07E-02 | transcription_start_site | + | 179726 | 179726 | -996  | 32564 | AN8641 |
| 991  | CONTIG158 | 178519 | 178941 | 1.73 | 2.07E-02 | transcription_start_site | + | 179901 | 179901 | -1171 | 32565 | AN8641 |
| 380  | CONTIG158 | 181659 | 182102 | 2.48 | 2.49E-03 | transcription_start_site | + | 181228 | 181228 | 652   | 32568 | AN8642 |
| 380  | CONTIG158 | 181659 | 182102 | 2.48 | 2.49E-03 | transcription_start_site | + | 180853 | 180853 | 1027  | 32567 | AN8642 |
| 380  | CONTIG158 | 181659 | 182102 | 2.48 | 2.49E-03 | transcription_start_site | + | 180666 | 180666 | 1214  | 32566 | AN8642 |
| 897  | CONTIG158 | 180079 | 180653 | 1.83 | 4.78E-03 | transcription_start_site | + | 180666 | 180666 | -300  | 32566 | AN8642 |
| 897  | CONTIG158 | 180079 | 180653 | 1.83 | 4.78E-03 | transcription_start_site | + | 180853 | 180853 | -487  | 32567 | AN8642 |
| 897  | CONTIG158 | 180079 | 180653 | 1.83 | 4.78E-03 | transcription_start_site | + | 181228 | 181228 | -862  | 32568 | AN8642 |
| 991  | CONTIG158 | 178519 | 178941 | 1.73 | 2.07E-02 | transcription_start_site | + | 180666 | 180666 | -1936 | 32566 | AN8642 |
| 991  | CONTIG158 | 178519 | 178941 | 1.73 | 2.07E-02 | transcription_start_site | + | 180853 | 180853 | -2123 | 32567 | AN8642 |
| 991  | CONTIG158 | 178519 | 178941 | 1.73 | 2.07E-02 | transcription_start_site | + | 181228 | 181228 | -2498 | 32568 | AN8642 |
| 99   | CONTIG158 | 184289 | 184868 | 3.09 | 3.81E-04 | transcription_start_site | - | 183418 | 183418 | -1160 | 32569 | AN8643 |
| 381  | CONTIG158 | 186079 | 186593 | 2.48 | 6.24E-03 | transcription_start_site | - | 183418 | 183418 | -2918 | 32569 | AN8643 |
| 99   | CONTIG158 | 184289 | 184868 | 3.09 | 3.81E-04 | transcription_start_site | + | 187186 | 187186 | -2607 | 32570 | AN8644 |
| 99   | CONTIG158 | 184289 | 184868 | 3.09 | 3.81E-04 | transcription_start_site | + | 187945 | 187945 | -3366 | 32571 | AN8644 |
| 99   | CONTIG158 | 184289 | 184868 | 3.09 | 3.81E-04 | transcription_start_site | + | 188435 | 188435 | -3856 | 32572 | AN8644 |

|      |           |        |        |      |          |                          |   |        |        |       |       |        |
|------|-----------|--------|--------|------|----------|--------------------------|---|--------|--------|-------|-------|--------|
| 381  | CONTIG158 | 186079 | 186593 | 2.48 | 6.24E-03 | transcription_start_site | + | 187186 | 187186 | -850  | 32570 | AN8644 |
| 381  | CONTIG158 | 186079 | 186593 | 2.48 | 6.24E-03 | transcription_start_site | + | 187945 | 187945 | -1609 | 32571 | AN8644 |
| 381  | CONTIG158 | 186079 | 186593 | 2.48 | 6.24E-03 | transcription_start_site | + | 188435 | 188435 | -2099 | 32572 | AN8644 |
| 1237 | CONTIG158 | 219013 | 219502 | 1.5  | 7.66E-02 | transcription_start_site | - | 214302 | 214302 | -4955 | 32587 | AN8650 |
| 1237 | CONTIG158 | 219013 | 219502 | 1.5  | 7.66E-02 | transcription_start_site | - | 214183 | 214183 | -5074 | 32588 | AN8650 |
| 1237 | CONTIG158 | 219013 | 219502 | 1.5  | 7.66E-02 | transcription_start_site | + | 219173 | 219173 | 84    | 32591 | AN8652 |
| 1237 | CONTIG158 | 219013 | 219502 | 1.5  | 7.66E-02 | transcription_start_site | + | 219370 | 219370 | -112  | 32592 | AN8652 |
| 1237 | CONTIG158 | 219013 | 219502 | 1.5  | 7.66E-02 | transcription_start_site | + | 219673 | 219673 | -415  | 32593 | AN8652 |
| 1237 | CONTIG158 | 219013 | 219502 | 1.5  | 7.66E-02 | transcription_start_site | + | 220303 | 220303 | -1045 | 32594 | AN8652 |
| 1237 | CONTIG158 | 219013 | 219502 | 1.5  | 7.66E-02 | transcription_start_site | + | 220648 | 220648 | -1390 | 32595 | AN8652 |
| 1237 | CONTIG158 | 219013 | 219502 | 1.5  | 7.66E-02 | transcription_start_site | + | 222140 | 222140 | -2882 | 32596 | AN8653 |
| 1237 | CONTIG158 | 219013 | 219502 | 1.5  | 7.66E-02 | transcription_start_site | + | 222484 | 222484 | -3226 | 32597 | AN8653 |
| 1237 | CONTIG158 | 219013 | 219502 | 1.5  | 7.66E-02 | transcription_start_site | + | 223899 | 223899 | -4641 | 32598 | AN8653 |
| 1237 | CONTIG158 | 219013 | 219502 | 1.5  | 7.66E-02 | transcription_start_site | + | 224077 | 224077 | -4819 | 32599 | AN8653 |
| 1234 | CONTIG158 | 231540 | 232115 | 1.5  | 4.21E-02 | transcription_start_site | - | 228141 | 228141 | -3686 | 32600 | AN8654 |
| 1234 | CONTIG158 | 231540 | 232115 | 1.5  | 4.21E-02 | transcription_start_site | - | 227936 | 227936 | -3891 | 32601 | AN8654 |
| 1234 | CONTIG158 | 231540 | 232115 | 1.5  | 4.21E-02 | transcription_start_site | - | 227642 | 227642 | -4185 | 32602 | AN8654 |
| 1234 | CONTIG158 | 231540 | 232115 | 1.5  | 4.21E-02 | transcription_start_site | - | 227404 | 227404 | -4423 | 32603 | AN8654 |
| 1234 | CONTIG158 | 231540 | 232115 | 1.5  | 4.21E-02 | transcription_start_site | - | 227019 | 227019 | -4808 | 32604 | AN8654 |
| 1238 | CONTIG158 | 227418 | 227689 | 1.5  | 7.66E-02 | transcription_start_site | - | 227642 | 227642 | 88    | 32602 | AN8654 |
| 1238 | CONTIG158 | 227418 | 227689 | 1.5  | 7.66E-02 | transcription_start_site | - | 227404 | 227404 | -149  | 32603 | AN8654 |
| 1238 | CONTIG158 | 227418 | 227689 | 1.5  | 7.66E-02 | transcription_start_site | - | 227936 | 227936 | 382   | 32601 | AN8654 |
| 1238 | CONTIG158 | 227418 | 227689 | 1.5  | 7.66E-02 | transcription_start_site | - | 227019 | 227019 | -534  | 32604 | AN8654 |
| 1238 | CONTIG158 | 227418 | 227689 | 1.5  | 7.66E-02 | transcription_start_site | - | 228141 | 228141 | 587   | 32600 | AN8654 |
| 1234 | CONTIG158 | 231540 | 232115 | 1.5  | 4.21E-02 | transcription_start_site | - | 231342 | 231342 | -485  | 32605 | AN8655 |
| 1234 | CONTIG158 | 231540 | 232115 | 1.5  | 4.21E-02 | transcription_start_site | - | 231019 | 231019 | -808  | 32606 | AN8655 |
| 1234 | CONTIG158 | 231540 | 232115 | 1.5  | 4.21E-02 | transcription_start_site | - | 230909 | 230909 | -918  | 32607 | AN8655 |
| 1234 | CONTIG158 | 231540 | 232115 | 1.5  | 4.21E-02 | transcription_start_site | - | 230460 | 230460 | -1367 | 32608 | AN8655 |
| 1234 | CONTIG158 | 231540 | 232115 | 1.5  | 4.21E-02 | transcription_start_site | - | 229373 | 229373 | -2454 | 32609 | AN8655 |
| 1234 | CONTIG158 | 231540 | 232115 | 1.5  | 4.21E-02 | transcription_start_site | - | 232573 | 232573 | 745   | 32611 | AN8656 |
| 1234 | CONTIG158 | 231540 | 232115 | 1.5  | 4.21E-02 | transcription_start_site | + | 233687 | 233687 | -1859 | 32612 | AN8657 |
| 1234 | CONTIG158 | 231540 | 232115 | 1.5  | 4.21E-02 | transcription_start_site | + | 234307 | 234307 | -2479 | 32613 | AN8657 |
| 1234 | CONTIG158 | 231540 | 232115 | 1.5  | 4.21E-02 | transcription_start_site | + | 234644 | 234644 | -2816 | 32614 | AN8657 |
| 1234 | CONTIG158 | 231540 | 232115 | 1.5  | 4.21E-02 | transcription_start_site | + | 235851 | 235851 | -4023 | 32615 | AN8657 |
| 942  | CONTIG158 | 246913 | 247477 | 1.78 | 3.70E-02 | transcription_start_site | - | 245814 | 245814 | -1381 | 32626 | AN8660 |
| 942  | CONTIG158 | 246913 | 247477 | 1.78 | 3.70E-02 | transcription_start_site | - | 245740 | 245740 | -1455 | 32627 | AN8660 |
| 942  | CONTIG158 | 246913 | 247477 | 1.78 | 3.70E-02 | transcription_start_site | - | 243583 | 243583 | -3612 | 32628 | AN8660 |
| 942  | CONTIG158 | 246913 | 247477 | 1.78 | 3.70E-02 | transcription_start_site | - | 243166 | 243166 | -4029 | 32629 | AN8660 |
| 942  | CONTIG158 | 246913 | 247477 | 1.78 | 3.70E-02 | transcription_start_site | + | 247880 | 247880 | -685  | 32630 | AN8661 |
| 942  | CONTIG158 | 246913 | 247477 | 1.78 | 3.70E-02 | transcription_start_site | + | 248092 | 248092 | -897  | 32631 | AN8661 |
| 942  | CONTIG158 | 246913 | 247477 | 1.78 | 3.70E-02 | transcription_start_site | + | 248433 | 248433 | -1238 | 32632 | AN8661 |
| 942  | CONTIG158 | 246913 | 247477 | 1.78 | 3.70E-02 | transcription_start_site | + | 248734 | 248734 | -1539 | 32633 | AN8661 |
| 942  | CONTIG158 | 246913 | 247477 | 1.78 | 3.70E-02 | transcription_start_site | + | 248930 | 248930 | -1735 | 32634 | AN8661 |
| 326  | CONTIG158 | 255678 | 256867 | 2.57 | 0.00E+00 | transcription_start_site | - | 252618 | 252618 | -3654 | 32635 | AN8662 |
| 326  | CONTIG158 | 255678 | 256867 | 2.57 | 0.00E+00 | transcription_start_site | - | 251980 | 251980 | -4292 | 32636 | AN8662 |
| 326  | CONTIG158 | 255678 | 256867 | 2.57 | 0.00E+00 | transcription_start_site | - | 251680 | 251680 | -4592 | 32637 | AN8662 |
| 326  | CONTIG158 | 255678 | 256867 | 2.57 | 0.00E+00 | transcription_start_site | - | 256830 | 256830 | 557   | 32638 | AN8663 |
| 326  | CONTIG158 | 255678 | 256867 | 2.57 | 0.00E+00 | transcription_start_site | - | 255632 | 255632 | -640  | 32639 | AN8663 |
| 326  | CONTIG158 | 255678 | 256867 | 2.57 | 0.00E+00 | transcription_start_site | - | 254875 | 254875 | -1397 | 32640 | AN8663 |
| 326  | CONTIG158 | 255678 | 256867 | 2.57 | 0.00E+00 | transcription_start_site | - | 253453 | 253453 | -2819 | 32641 | AN8663 |
| 326  | CONTIG158 | 255678 | 256867 | 2.57 | 0.00E+00 | transcription_start_site | + | 257744 | 257744 | -1471 | 32642 | AN8664 |
| 326  | CONTIG158 | 255678 | 256867 | 2.57 | 0.00E+00 | transcription_start_site | + | 257822 | 257822 | -1549 | 32643 | AN8664 |
| 326  | CONTIG158 | 255678 | 256867 | 2.57 | 0.00E+00 | transcription_start_site | + | 257941 | 257941 | -1668 | 32644 | AN8664 |
| 326  | CONTIG158 | 255678 | 256867 | 2.57 | 0.00E+00 | transcription_start_site | + | 258058 | 258058 | -1785 | 32645 | AN8664 |
| 326  | CONTIG158 | 255678 | 256867 | 2.57 | 0.00E+00 | transcription_start_site | + | 261850 | 261850 | -5577 | 32646 | AN8665 |
| 986  | CONTIG158 | 263563 | 265252 | 1.73 | 2.02E-03 | transcription_start_site | + | 262959 | 262959 | 1448  | 32648 | AN8665 |
| 986  | CONTIG158 | 263563 | 265252 | 1.73 | 2.02E-03 | transcription_start_site | + | 266595 | 266595 | -2187 | 32649 | AN8666 |

|      |           |        |        |      |          |                          |   |        |        |       |       |        |
|------|-----------|--------|--------|------|----------|--------------------------|---|--------|--------|-------|-------|--------|
| 986  | CONTIG158 | 263563 | 265252 | 1.73 | 2.02E-03 | transcription_start_site | + | 266774 | 266774 | -2366 | 32650 | AN8666 |
| 43   | CONTIG158 | 274733 | 275162 | 3.28 | 2.69E-04 | transcription_start_site | + | 276466 | 276466 | -1518 | 32651 | AN8667 |
| 43   | CONTIG158 | 274733 | 275162 | 3.28 | 2.69E-04 | transcription_start_site | + | 276967 | 276967 | -2019 | 32652 | AN8667 |
| 100  | CONTIG158 | 274068 | 274634 | 3.09 | 3.81E-04 | transcription_start_site | + | 276466 | 276466 | -2115 | 32651 | AN8667 |
| 100  | CONTIG158 | 274068 | 274634 | 3.09 | 3.81E-04 | transcription_start_site | + | 276967 | 276967 | -2616 | 32652 | AN8667 |
| 352  | CONTIG158 | 273088 | 274037 | 2.53 | 0.00E+00 | transcription_start_site | + | 276466 | 276466 | -2903 | 32651 | AN8667 |
| 352  | CONTIG158 | 273088 | 274037 | 2.53 | 0.00E+00 | transcription_start_site | + | 276967 | 276967 | -3404 | 32652 | AN8667 |
| 43   | CONTIG158 | 274733 | 275162 | 3.28 | 2.69E-04 | transcription_start_site | + | 279929 | 279929 | -4981 | 32653 | AN8668 |
| 43   | CONTIG158 | 274733 | 275162 | 3.28 | 2.69E-04 | transcription_start_site | + | 280024 | 280024 | -5076 | 32654 | AN8668 |
| 351  | CONTIG159 | 24152  | 24431  | 2.54 | 6.24E-03 | transcription_start_site | - | 23159  | 23159  | -1132 | 32666 | AN8672 |
| 351  | CONTIG159 | 24152  | 24431  | 2.54 | 6.24E-03 | transcription_start_site | - | 22640  | 22640  | -1651 | 32667 | AN8672 |
| 351  | CONTIG159 | 24152  | 24431  | 2.54 | 6.24E-03 | transcription_start_site | - | 19641  | 19641  | -4650 | 32668 | AN8672 |
| 351  | CONTIG159 | 24152  | 24431  | 2.54 | 6.24E-03 | transcription_start_site | - | 19359  | 19359  | -4932 | 32669 | AN8672 |
| 351  | CONTIG159 | 24152  | 24431  | 2.54 | 6.24E-03 | transcription_start_site | + | 26580  | 26580  | -2288 | 32670 | AN8673 |
| 351  | CONTIG159 | 24152  | 24431  | 2.54 | 6.24E-03 | transcription_start_site | + | 27094  | 27094  | -2802 | 32671 | AN8673 |
| 351  | CONTIG159 | 24152  | 24431  | 2.54 | 6.24E-03 | transcription_start_site | + | 27256  | 27256  | -2964 | 32672 | AN8673 |
| 351  | CONTIG159 | 24152  | 24431  | 2.54 | 6.24E-03 | transcription_start_site | + | 27337  | 27337  | -3045 | 32673 | AN8673 |
| 351  | CONTIG159 | 24152  | 24431  | 2.54 | 6.24E-03 | transcription_start_site | + | 27424  | 27424  | -3132 | 32674 | AN8673 |
| 351  | CONTIG159 | 24152  | 24431  | 2.54 | 6.24E-03 | transcription_start_site | + | 27632  | 27632  | -3340 | 32675 | AN8673 |
| 351  | CONTIG159 | 24152  | 24431  | 2.54 | 6.24E-03 | transcription_start_site | + | 27876  | 27876  | -3584 | 32676 | AN8673 |
| 409  | CONTIG159 | 34951  | 35245  | 2.44 | 7.70E-03 | transcription_start_site | - | 30165  | 30165  | -4933 | 32677 | AN8674 |
| 409  | CONTIG159 | 34951  | 35245  | 2.44 | 7.70E-03 | transcription_start_site | - | 30059  | 30059  | -5039 | 32678 | AN8674 |
| 409  | CONTIG159 | 34951  | 35245  | 2.44 | 7.70E-03 | transcription_start_site | - | 34722  | 34722  | -376  | 32683 | AN8676 |
| 409  | CONTIG159 | 34951  | 35245  | 2.44 | 7.70E-03 | transcription_start_site | - | 34306  | 34306  | -792  | 32684 | AN8676 |
| 409  | CONTIG159 | 34951  | 35245  | 2.44 | 7.70E-03 | transcription_start_site | - | 34108  | 34108  | -990  | 32685 | AN8676 |
| 649  | CONTIG159 | 38861  | 39350  | 2.11 | 7.36E-03 | transcription_start_site | - | 34722  | 34722  | -4383 | 32683 | AN8676 |
| 649  | CONTIG159 | 38861  | 39350  | 2.11 | 7.36E-03 | transcription_start_site | - | 34306  | 34306  | -4799 | 32684 | AN8676 |
| 649  | CONTIG159 | 38861  | 39350  | 2.11 | 7.36E-03 | transcription_start_site | - | 34108  | 34108  | -4997 | 32685 | AN8676 |
| 912  | CONTIG159 | 39466  | 40101  | 1.82 | 3.70E-02 | transcription_start_site | - | 34722  | 34722  | -5061 | 32683 | AN8676 |
| 649  | CONTIG159 | 38861  | 39350  | 2.11 | 7.36E-03 | transcription_start_site | - | 38511  | 38511  | -594  | 32686 | AN8677 |
| 912  | CONTIG159 | 39466  | 40101  | 1.82 | 3.70E-02 | transcription_start_site | - | 38511  | 38511  | -1272 | 32686 | AN8677 |
| 1294 | CONTIG160 | 13656  | 15209  | 1.45 | 5.49E-02 | transcription_start_site | - | 12500  | 12500  | -1932 | 32714 | AN8691 |
| 1294 | CONTIG160 | 13656  | 15209  | 1.45 | 5.49E-02 | transcription_start_site | - | 12074  | 12074  | -2358 | 32715 | AN8691 |
| 1294 | CONTIG160 | 13656  | 15209  | 1.45 | 5.49E-02 | transcription_start_site | - | 9649   | 9649   | -4783 | 32716 | AN8691 |
| 1294 | CONTIG160 | 13656  | 15209  | 1.45 | 5.49E-02 | transcription_start_site | - | 13685  | 13685  | -747  | 32717 | AN8692 |
| 1294 | CONTIG160 | 13656  | 15209  | 1.45 | 5.49E-02 | transcription_start_site | - | 13569  | 13569  | -863  | 32718 | AN8692 |
| 1294 | CONTIG160 | 13656  | 15209  | 1.45 | 5.49E-02 | transcription_start_site | - | 13236  | 13236  | -1196 | 32719 | AN8692 |
| 0    | CONTIG160 | 27002  | 27356  | 3.95 | 0.00E+00 | transcription_start_site | - | 24673  | 24673  | -2506 | 32720 | AN8694 |
| 0    | CONTIG160 | 27002  | 27356  | 3.95 | 0.00E+00 | transcription_start_site | - | 24408  | 24408  | -2771 | 32721 | AN8694 |
| 0    | CONTIG160 | 27002  | 27356  | 3.95 | 0.00E+00 | transcription_start_site | - | 23985  | 23985  | -3194 | 32722 | AN8694 |
| 0    | CONTIG160 | 27002  | 27356  | 3.95 | 0.00E+00 | transcription_start_site | - | 23595  | 23595  | -3584 | 32723 | AN8694 |
| 0    | CONTIG160 | 27002  | 27356  | 3.95 | 0.00E+00 | transcription_start_site | - | 22676  | 22676  | -4503 | 32724 | AN8694 |
| 5    | CONTIG160 | 26192  | 26826  | 3.61 | 0.00E+00 | transcription_start_site | - | 24673  | 24673  | -1836 | 32720 | AN8694 |
| 5    | CONTIG160 | 26192  | 26826  | 3.61 | 0.00E+00 | transcription_start_site | - | 24408  | 24408  | -2101 | 32721 | AN8694 |
| 5    | CONTIG160 | 26192  | 26826  | 3.61 | 0.00E+00 | transcription_start_site | - | 23985  | 23985  | -2524 | 32722 | AN8694 |
| 5    | CONTIG160 | 26192  | 26826  | 3.61 | 0.00E+00 | transcription_start_site | - | 23595  | 23595  | -2914 | 32723 | AN8694 |
| 5    | CONTIG160 | 26192  | 26826  | 3.61 | 0.00E+00 | transcription_start_site | - | 22676  | 22676  | -3833 | 32724 | AN8694 |
| 314  | CONTIG160 | 28971  | 29845  | 2.6  | 0.00E+00 | transcription_start_site | - | 24673  | 24673  | -4735 | 32720 | AN8694 |
| 314  | CONTIG160 | 28971  | 29845  | 2.6  | 0.00E+00 | transcription_start_site | - | 24408  | 24408  | -5000 | 32721 | AN8694 |
| 314  | CONTIG160 | 28971  | 29845  | 2.6  | 0.00E+00 | transcription_start_site | - | 23985  | 23985  | -5423 | 32722 | AN8694 |
| 721  | CONTIG160 | 24767  | 25491  | 2.02 | 1.75E-03 | transcription_start_site | - | 24673  | 24673  | -456  | 32720 | AN8694 |
| 721  | CONTIG160 | 24767  | 25491  | 2.02 | 1.75E-03 | transcription_start_site | - | 24408  | 24408  | -721  | 32721 | AN8694 |
| 721  | CONTIG160 | 24767  | 25491  | 2.02 | 1.75E-03 | transcription_start_site | - | 23985  | 23985  | -1144 | 32722 | AN8694 |
| 721  | CONTIG160 | 24767  | 25491  | 2.02 | 1.75E-03 | transcription_start_site | - | 23595  | 23595  | -1534 | 32723 | AN8694 |
| 721  | CONTIG160 | 24767  | 25491  | 2.02 | 1.75E-03 | transcription_start_site | - | 22676  | 22676  | -2453 | 32724 | AN8694 |
| 577  | CONTIG160 | 34666  | 34940  | 2.22 | 1.37E-02 | transcription_start_site | - | 34851  | 34851  | 48    | 32731 | AN8695 |
| 577  | CONTIG160 | 34666  | 34940  | 2.22 | 1.37E-02 | transcription_start_site | - | 34385  | 34385  | -418  | 32732 | AN8695 |

|      |           |        |        |      |          |                          |   |        |        |       |       |        |
|------|-----------|--------|--------|------|----------|--------------------------|---|--------|--------|-------|-------|--------|
| 577  | CONTIG160 | 34666  | 34940  | 2.22 | 1.37E-02 | transcription_start_site | - | 35712  | 35712  | 909   | 32730 | AN8695 |
| 577  | CONTIG160 | 34666  | 34940  | 2.22 | 1.37E-02 | transcription_start_site | + | 37716  | 37716  | -2913 | 32733 | AN8696 |
| 577  | CONTIG160 | 34666  | 34940  | 2.22 | 1.37E-02 | transcription_start_site | + | 38296  | 38296  | -3493 | 32734 | AN8696 |
| 1463 | CONTIG160 | 66387  | 66816  | 1.3  | 8.54E-02 | transcription_start_site | - | 63669  | 63669  | -2932 | 32762 | AN8706 |
| 1463 | CONTIG160 | 66387  | 66816  | 1.3  | 8.54E-02 | transcription_start_site | - | 63179  | 63179  | -3422 | 32763 | AN8706 |
| 1536 | CONTIG160 | 63694  | 64200  | 1.25 | 9.90E-02 | transcription_start_site | - | 63669  | 63669  | -278  | 32762 | AN8706 |
| 1536 | CONTIG160 | 63694  | 64200  | 1.25 | 9.90E-02 | transcription_start_site | - | 63179  | 63179  | -768  | 32763 | AN8706 |
| 1670 | CONTIG160 | 68332  | 68702  | 1.16 | 1.97E-01 | transcription_start_site | - | 63669  | 63669  | -4848 | 32762 | AN8706 |
| 1463 | CONTIG160 | 66387  | 66816  | 1.3  | 8.54E-02 | transcription_start_site | - | 66265  | 66265  | -336  | 32764 | AN8707 |
| 1463 | CONTIG160 | 66387  | 66816  | 1.3  | 8.54E-02 | transcription_start_site | - | 65963  | 65963  | -638  | 32765 | AN8707 |
| 1463 | CONTIG160 | 66387  | 66816  | 1.3  | 8.54E-02 | transcription_start_site | - | 65864  | 65864  | -737  | 32766 | AN8707 |
| 1463 | CONTIG160 | 66387  | 66816  | 1.3  | 8.54E-02 | transcription_start_site | - | 65764  | 65764  | -837  | 32767 | AN8707 |
| 1463 | CONTIG160 | 66387  | 66816  | 1.3  | 8.54E-02 | transcription_start_site | - | 65594  | 65594  | -1007 | 32768 | AN8707 |
| 1463 | CONTIG160 | 66387  | 66816  | 1.3  | 8.54E-02 | transcription_start_site | - | 64526  | 64526  | -2075 | 32769 | AN8707 |
| 1536 | CONTIG160 | 63694  | 64200  | 1.25 | 9.90E-02 | transcription_start_site | - | 64526  | 64526  | 579   | 32769 | AN8707 |
| 1670 | CONTIG160 | 68332  | 68702  | 1.16 | 1.97E-01 | transcription_start_site | - | 66265  | 66265  | -2252 | 32764 | AN8707 |
| 1670 | CONTIG160 | 68332  | 68702  | 1.16 | 1.97E-01 | transcription_start_site | - | 65963  | 65963  | -2554 | 32765 | AN8707 |
| 1670 | CONTIG160 | 68332  | 68702  | 1.16 | 1.97E-01 | transcription_start_site | - | 65864  | 65864  | -2653 | 32766 | AN8707 |
| 1670 | CONTIG160 | 68332  | 68702  | 1.16 | 1.97E-01 | transcription_start_site | - | 65764  | 65764  | -2753 | 32767 | AN8707 |
| 1670 | CONTIG160 | 68332  | 68702  | 1.16 | 1.97E-01 | transcription_start_site | - | 65594  | 65594  | -2923 | 32768 | AN8707 |
| 1670 | CONTIG160 | 68332  | 68702  | 1.16 | 1.97E-01 | transcription_start_site | - | 64526  | 64526  | -3991 | 32769 | AN8707 |
| 1463 | CONTIG160 | 66387  | 66816  | 1.3  | 8.54E-02 | transcription_start_site | + | 67305  | 67305  | -703  | 32770 | AN8708 |
| 1463 | CONTIG160 | 66387  | 66816  | 1.3  | 8.54E-02 | transcription_start_site | + | 67652  | 67652  | -1050 | 32771 | AN8708 |
| 1463 | CONTIG160 | 66387  | 66816  | 1.3  | 8.54E-02 | transcription_start_site | + | 67857  | 67857  | -1255 | 32772 | AN8708 |
| 1463 | CONTIG160 | 66387  | 66816  | 1.3  | 8.54E-02 | transcription_start_site | + | 68198  | 68198  | -1596 | 32773 | AN8708 |
| 1536 | CONTIG160 | 63694  | 64200  | 1.25 | 9.90E-02 | transcription_start_site | + | 67305  | 67305  | -3358 | 32770 | AN8708 |
| 1536 | CONTIG160 | 63694  | 64200  | 1.25 | 9.90E-02 | transcription_start_site | + | 67652  | 67652  | -3705 | 32771 | AN8708 |
| 1536 | CONTIG160 | 63694  | 64200  | 1.25 | 9.90E-02 | transcription_start_site | + | 67857  | 67857  | -3910 | 32772 | AN8708 |
| 1536 | CONTIG160 | 63694  | 64200  | 1.25 | 9.90E-02 | transcription_start_site | + | 68198  | 68198  | -4251 | 32773 | AN8708 |
| 1670 | CONTIG160 | 68332  | 68702  | 1.16 | 1.97E-01 | transcription_start_site | + | 68198  | 68198  | 319   | 32773 | AN8708 |
| 1670 | CONTIG160 | 68332  | 68702  | 1.16 | 1.97E-01 | transcription_start_site | + | 67857  | 67857  | 660   | 32772 | AN8708 |
| 1670 | CONTIG160 | 68332  | 68702  | 1.16 | 1.97E-01 | transcription_start_site | + | 67652  | 67652  | 865   | 32771 | AN8708 |
| 1463 | CONTIG160 | 66387  | 66816  | 1.3  | 8.54E-02 | transcription_start_site | + | 68795  | 68795  | -2193 | 32774 | AN8709 |
| 1463 | CONTIG160 | 66387  | 66816  | 1.3  | 8.54E-02 | transcription_start_site | + | 69937  | 69937  | -3335 | 32775 | AN8709 |
| 1463 | CONTIG160 | 66387  | 66816  | 1.3  | 8.54E-02 | transcription_start_site | + | 70141  | 70141  | -3539 | 32776 | AN8709 |
| 1536 | CONTIG160 | 63694  | 64200  | 1.25 | 9.90E-02 | transcription_start_site | + | 68795  | 68795  | -4848 | 32774 | AN8709 |
| 1670 | CONTIG160 | 68332  | 68702  | 1.16 | 1.97E-01 | transcription_start_site | + | 68795  | 68795  | -278  | 32774 | AN8709 |
| 1670 | CONTIG160 | 68332  | 68702  | 1.16 | 1.97E-01 | transcription_start_site | + | 69937  | 69937  | -1420 | 32775 | AN8709 |
| 1670 | CONTIG160 | 68332  | 68702  | 1.16 | 1.97E-01 | transcription_start_site | + | 70141  | 70141  | -1624 | 32776 | AN8709 |
| 1670 | CONTIG160 | 68332  | 68702  | 1.16 | 1.97E-01 | transcription_start_site | + | 73652  | 73652  | -5135 | 32780 | AN8712 |
| 70   | CONTIG160 | 92027  | 92376  | 3.18 | 3.81E-04 | transcription_start_site | + | 94396  | 94396  | -2194 | 32794 | AN8718 |
| 70   | CONTIG160 | 92027  | 92376  | 3.18 | 3.81E-04 | transcription_start_site | + | 94576  | 94576  | -2374 | 32795 | AN8718 |
| 70   | CONTIG160 | 92027  | 92376  | 3.18 | 3.81E-04 | transcription_start_site | + | 94751  | 94751  | -2549 | 32796 | AN8718 |
| 70   | CONTIG160 | 92027  | 92376  | 3.18 | 3.81E-04 | transcription_start_site | + | 94853  | 94853  | -2651 | 32797 | AN8718 |
| 70   | CONTIG160 | 92027  | 92376  | 3.18 | 3.81E-04 | transcription_start_site | + | 95329  | 95329  | -3127 | 32798 | AN8718 |
| 70   | CONTIG160 | 92027  | 92376  | 3.18 | 3.81E-04 | transcription_start_site | + | 96901  | 96901  | -4699 | 32799 | AN8718 |
| 257  | CONTIG160 | 125112 | 125381 | 2.7  | 4.01E-03 | transcription_start_site | - | 123166 | 123166 | -2080 | 32831 | AN8730 |
| 257  | CONTIG160 | 125112 | 125381 | 2.7  | 4.01E-03 | transcription_start_site | - | 121941 | 121941 | -3305 | 32832 | AN8730 |
| 21   | CONTIG161 | 5421   | 5685   | 3.44 | 2.26E-04 | transcription_start_site | + | 4831   | 4831   | 722   | 32857 | AN8739 |
| 1    | CONTIG161 | 12989  | 13258  | 3.85 | 0.00E+00 | transcription_start_site | - | 13558  | 13558  | 434   | 32859 | AN8740 |
| 1    | CONTIG161 | 12989  | 13258  | 3.85 | 0.00E+00 | transcription_start_site | - | 13708  | 13708  | 584   | 32858 | AN8740 |
| 33   | CONTIG161 | 12319  | 12955  | 3.34 | 3.81E-04 | transcription_start_site | - | 13558  | 13558  | 921   | 32859 | AN8740 |
| 33   | CONTIG161 | 12319  | 12955  | 3.34 | 3.81E-04 | transcription_start_site | - | 13708  | 13708  | 1071  | 32858 | AN8740 |
| 124  | CONTIG161 | 13809  | 14078  | 3.04 | 1.77E-03 | transcription_start_site | - | 13708  | 13708  | -235  | 32858 | AN8740 |
| 124  | CONTIG161 | 13809  | 14078  | 3.04 | 1.77E-03 | transcription_start_site | - | 13558  | 13558  | -385  | 32859 | AN8740 |
| 1    | CONTIG161 | 12989  | 13258  | 3.85 | 0.00E+00 | transcription_start_site | + | 14830  | 14830  | -1706 | 32860 | AN8741 |
| 1    | CONTIG161 | 12989  | 13258  | 3.85 | 0.00E+00 | transcription_start_site | + | 15116  | 15116  | -1992 | 32861 | AN8741 |



|      |           |       |       |      |          |                          |   |       |       |       |       |        |
|------|-----------|-------|-------|------|----------|--------------------------|---|-------|-------|-------|-------|--------|
| 9    | CONTIG161 | 10578 | 11077 | 3.55 | 2.69E-04 | transcription_start_site | + | 14830 | 14830 | -4002 | 32860 | AN8741 |
| 9    | CONTIG161 | 10578 | 11077 | 3.55 | 2.69E-04 | transcription_start_site | + | 15116 | 15116 | -4288 | 32861 | AN8741 |
| 33   | CONTIG161 | 12319 | 12955 | 3.34 | 3.81E-04 | transcription_start_site | + | 14830 | 14830 | -2193 | 32860 | AN8741 |
| 33   | CONTIG161 | 12319 | 12955 | 3.34 | 3.81E-04 | transcription_start_site | + | 15116 | 15116 | -2479 | 32861 | AN8741 |
| 124  | CONTIG161 | 13809 | 14078 | 3.04 | 1.77E-03 | transcription_start_site | + | 14830 | 14830 | -886  | 32860 | AN8741 |
| 124  | CONTIG161 | 13809 | 14078 | 3.04 | 1.77E-03 | transcription_start_site | + | 15116 | 15116 | -1172 | 32861 | AN8741 |
| 1580 | CONTIG161 | 29860 | 30219 | 1.22 | 1.97E-01 | transcription_start_site | - | 25467 | 25467 | -4572 | 32869 | AN8743 |
| 1580 | CONTIG161 | 29860 | 30219 | 1.22 | 1.97E-01 | transcription_start_site | - | 25053 | 25053 | -4986 | 32870 | AN8743 |
| 1580 | CONTIG161 | 29860 | 30219 | 1.22 | 1.97E-01 | transcription_start_site | - | 27320 | 27320 | -2719 | 32871 | AN8744 |
| 1580 | CONTIG161 | 29860 | 30219 | 1.22 | 1.97E-01 | transcription_start_site | - | 27043 | 27043 | -2996 | 32872 | AN8744 |
| 1580 | CONTIG161 | 29860 | 30219 | 1.22 | 1.97E-01 | transcription_start_site | - | 26958 | 26958 | -3081 | 32873 | AN8744 |
| 1580 | CONTIG161 | 29860 | 30219 | 1.22 | 1.97E-01 | transcription_start_site | - | 26247 | 26247 | -3792 | 32874 | AN8744 |
| 101  | CONTIG161 | 45001 | 45290 | 3.09 | 1.62E-03 | transcription_start_site | - | 40161 | 40161 | -4984 | 32875 | AN8748 |
| 101  | CONTIG161 | 45001 | 45290 | 3.09 | 1.62E-03 | transcription_start_site | - | 40028 | 40028 | -5117 | 32876 | AN8748 |
| 17   | CONTIG161 | 46596 | 46930 | 3.49 | 2.51E-04 | transcription_start_site | - | 41767 | 41767 | -4996 | 32881 | AN8749 |
| 17   | CONTIG161 | 46596 | 46930 | 3.49 | 2.51E-04 | transcription_start_site | - | 41646 | 41646 | -5117 | 32882 | AN8749 |
| 101  | CONTIG161 | 45001 | 45290 | 3.09 | 1.62E-03 | transcription_start_site | - | 41767 | 41767 | -3378 | 32881 | AN8749 |
| 101  | CONTIG161 | 45001 | 45290 | 3.09 | 1.62E-03 | transcription_start_site | - | 41646 | 41646 | -3499 | 32882 | AN8749 |
| 101  | CONTIG161 | 45001 | 45290 | 3.09 | 1.62E-03 | transcription_start_site | - | 41049 | 41049 | -4096 | 32883 | AN8749 |
| 239  | CONTIG161 | 45756 | 46345 | 2.74 | 5.08E-03 | transcription_start_site | - | 41767 | 41767 | -4283 | 32881 | AN8749 |
| 239  | CONTIG161 | 45756 | 46345 | 2.74 | 5.08E-03 | transcription_start_site | - | 41646 | 41646 | -4404 | 32882 | AN8749 |
| 239  | CONTIG161 | 45756 | 46345 | 2.74 | 5.08E-03 | transcription_start_site | - | 41049 | 41049 | -5001 | 32883 | AN8749 |
| 17   | CONTIG161 | 46596 | 46930 | 3.49 | 2.51E-04 | transcription_start_site | - | 45759 | 45759 | -1004 | 32886 | AN8751 |
| 17   | CONTIG161 | 46596 | 46930 | 3.49 | 2.51E-04 | transcription_start_site | - | 45144 | 45144 | -1619 | 32887 | AN8751 |
| 17   | CONTIG161 | 46596 | 46930 | 3.49 | 2.51E-04 | transcription_start_site | - | 43780 | 43780 | -2983 | 32888 | AN8751 |
| 101  | CONTIG161 | 45001 | 45290 | 3.09 | 1.62E-03 | transcription_start_site | - | 45144 | 45144 | -1    | 32887 | AN8751 |
| 101  | CONTIG161 | 45001 | 45290 | 3.09 | 1.62E-03 | transcription_start_site | - | 45759 | 45759 | 613   | 32886 | AN8751 |
| 101  | CONTIG161 | 45001 | 45290 | 3.09 | 1.62E-03 | transcription_start_site | - | 43780 | 43780 | -1365 | 32888 | AN8751 |
| 239  | CONTIG161 | 45756 | 46345 | 2.74 | 5.08E-03 | transcription_start_site | - | 45759 | 45759 | -291  | 32886 | AN8751 |
| 239  | CONTIG161 | 45756 | 46345 | 2.74 | 5.08E-03 | transcription_start_site | - | 45144 | 45144 | -906  | 32887 | AN8751 |
| 239  | CONTIG161 | 45756 | 46345 | 2.74 | 5.08E-03 | transcription_start_site | - | 43780 | 43780 | -2270 | 32888 | AN8751 |
| 17   | CONTIG161 | 46596 | 46930 | 3.49 | 2.51E-04 | transcription_start_site | - | 46956 | 46956 | 193   | 32891 | AN8752 |
| 17   | CONTIG161 | 46596 | 46930 | 3.49 | 2.51E-04 | transcription_start_site | - | 47249 | 47249 | 486   | 32890 | AN8752 |
| 17   | CONTIG161 | 46596 | 46930 | 3.49 | 2.51E-04 | transcription_start_site | - | 47396 | 47396 | 633   | 32889 | AN8752 |
| 239  | CONTIG161 | 45756 | 46345 | 2.74 | 5.08E-03 | transcription_start_site | - | 46956 | 46956 | 905   | 32891 | AN8752 |
| 239  | CONTIG161 | 45756 | 46345 | 2.74 | 5.08E-03 | transcription_start_site | - | 47249 | 47249 | 1198  | 32890 | AN8752 |
| 491  | CONTIG161 | 69844 | 70178 | 2.33 | 1.37E-02 | transcription_start_site | - | 64987 | 64987 | -5024 | 32909 | AN8756 |
| 1055 | CONTIG161 | 66081 | 66594 | 1.67 | 3.61E-02 | transcription_start_site | - | 64987 | 64987 | -1350 | 32909 | AN8756 |
| 1055 | CONTIG161 | 66081 | 66594 | 1.67 | 3.61E-02 | transcription_start_site | - | 63763 | 63763 | -2574 | 32910 | AN8756 |
| 1055 | CONTIG161 | 66081 | 66594 | 1.67 | 3.61E-02 | transcription_start_site | - | 63202 | 63202 | -3135 | 32911 | AN8756 |
| 491  | CONTIG161 | 69844 | 70178 | 2.33 | 1.37E-02 | transcription_start_site | + | 69348 | 69348 | 663   | 32917 | AN8757 |
| 1055 | CONTIG161 | 66081 | 66594 | 1.67 | 3.61E-02 | transcription_start_site | + | 67372 | 67372 | -1034 | 32912 | AN8757 |
| 1055 | CONTIG161 | 66081 | 66594 | 1.67 | 3.61E-02 | transcription_start_site | + | 67808 | 67808 | -1470 | 32913 | AN8757 |
| 1055 | CONTIG161 | 66081 | 66594 | 1.67 | 3.61E-02 | transcription_start_site | + | 68054 | 68054 | -1716 | 32914 | AN8757 |
| 1055 | CONTIG161 | 66081 | 66594 | 1.67 | 3.61E-02 | transcription_start_site | + | 68268 | 68268 | -1930 | 32915 | AN8757 |
| 1055 | CONTIG161 | 66081 | 66594 | 1.67 | 3.61E-02 | transcription_start_site | + | 68648 | 68648 | -2310 | 32916 | AN8757 |
| 1055 | CONTIG161 | 66081 | 66594 | 1.67 | 3.61E-02 | transcription_start_site | + | 69348 | 69348 | -3010 | 32917 | AN8757 |
| 1057 | CONTIG161 | 74194 | 74603 | 1.67 | 6.74E-02 | transcription_start_site | - | 74019 | 74019 | -379  | 32918 | AN8759 |
| 1057 | CONTIG161 | 74194 | 74603 | 1.67 | 6.74E-02 | transcription_start_site | - | 73902 | 73902 | -496  | 32919 | AN8759 |
| 1057 | CONTIG161 | 74194 | 74603 | 1.67 | 6.74E-02 | transcription_start_site | - | 73444 | 73444 | -954  | 32920 | AN8759 |
| 1057 | CONTIG161 | 74194 | 74603 | 1.67 | 6.74E-02 | transcription_start_site | - | 73172 | 73172 | -1226 | 32921 | AN8759 |
| 491  | CONTIG161 | 69844 | 70178 | 2.33 | 1.37E-02 | transcription_start_site | + | 75002 | 75002 | -4991 | 32922 | AN8760 |
| 1057 | CONTIG161 | 74194 | 74603 | 1.67 | 6.74E-02 | transcription_start_site | + | 75002 | 75002 | -603  | 32922 | AN8760 |
| 1057 | CONTIG161 | 74194 | 74603 | 1.67 | 6.74E-02 | transcription_start_site | + | 75313 | 75313 | -914  | 32923 | AN8760 |
| 1057 | CONTIG161 | 74194 | 74603 | 1.67 | 6.74E-02 | transcription_start_site | + | 75761 | 75761 | -1362 | 32924 | AN8760 |
| 1057 | CONTIG161 | 74194 | 74603 | 1.67 | 6.74E-02 | transcription_start_site | + | 75973 | 75973 | -1574 | 32925 | AN8760 |
| 1057 | CONTIG161 | 74194 | 74603 | 1.67 | 6.74E-02 | transcription_start_site | + | 76465 | 76465 | -2066 | 32926 | AN8760 |

|      |           |        |        |      |          |                          |   |        |        |       |       |        |
|------|-----------|--------|--------|------|----------|--------------------------|---|--------|--------|-------|-------|--------|
| 527  | CONTIG161 | 87753  | 88042  | 2.28 | 1.54E-02 | transcription_start_site | - | 85824  | 85824  | -2073 | 32943 | AN8765 |
| 527  | CONTIG161 | 87753  | 88042  | 2.28 | 1.54E-02 | transcription_start_site | - | 85456  | 85456  | -2441 | 32944 | AN8765 |
| 527  | CONTIG161 | 87753  | 88042  | 2.28 | 1.54E-02 | transcription_start_site | - | 83431  | 83431  | -4466 | 32945 | AN8765 |
| 527  | CONTIG161 | 87753  | 88042  | 2.28 | 1.54E-02 | transcription_start_site | + | 87978  | 87978  | -80   | 32946 | AN8766 |
| 527  | CONTIG161 | 87753  | 88042  | 2.28 | 1.54E-02 | transcription_start_site | + | 88074  | 88074  | -176  | 32947 | AN8766 |
| 527  | CONTIG161 | 87753  | 88042  | 2.28 | 1.54E-02 | transcription_start_site | + | 88319  | 88319  | -421  | 32948 | AN8766 |
| 527  | CONTIG161 | 87753  | 88042  | 2.28 | 1.54E-02 | transcription_start_site | + | 92433  | 92433  | -4535 | 32950 | AN8768 |
| 527  | CONTIG161 | 87753  | 88042  | 2.28 | 1.54E-02 | transcription_start_site | + | 92788  | 92788  | -4890 | 32951 | AN8768 |
| 49   | CONTIG161 | 121651 | 122010 | 3.24 | 8.43E-04 | transcription_start_site | + | 122220 | 122220 | -389  | 32967 | AN8774 |
| 49   | CONTIG161 | 121651 | 122010 | 3.24 | 8.43E-04 | transcription_start_site | + | 122305 | 122305 | -474  | 32968 | AN8774 |
| 49   | CONTIG161 | 121651 | 122010 | 3.24 | 8.43E-04 | transcription_start_site | + | 124930 | 124930 | -3099 | 32969 | AN8775 |
| 49   | CONTIG161 | 121651 | 122010 | 3.24 | 8.43E-04 | transcription_start_site | + | 125392 | 125392 | -3561 | 32970 | AN8775 |
| 49   | CONTIG161 | 121651 | 122010 | 3.24 | 8.43E-04 | transcription_start_site | + | 126000 | 126000 | -4169 | 32971 | AN8775 |
| 49   | CONTIG161 | 121651 | 122010 | 3.24 | 8.43E-04 | transcription_start_site | + | 126347 | 126347 | -4516 | 32972 | AN8775 |
| 1577 | CONTIG161 | 130951 | 131470 | 1.22 | 1.05E-01 | transcription_start_site | - | 130089 | 130089 | -1121 | 32974 | AN8776 |
| 1577 | CONTIG161 | 130951 | 131470 | 1.22 | 1.05E-01 | transcription_start_site | + | 131465 | 131465 | -254  | 32975 | AN8777 |
| 1577 | CONTIG161 | 130951 | 131470 | 1.22 | 1.05E-01 | transcription_start_site | + | 131809 | 131809 | -598  | 32976 | AN8777 |
| 1577 | CONTIG161 | 130951 | 131470 | 1.22 | 1.05E-01 | transcription_start_site | + | 132010 | 132010 | -799  | 32977 | AN8777 |
| 1577 | CONTIG161 | 130951 | 131470 | 1.22 | 1.05E-01 | transcription_start_site | + | 132544 | 132544 | -1333 | 32978 | AN8777 |
| 569  | CONTIG161 | 164789 | 165068 | 2.23 | 1.80E-02 | transcription_start_site | - | 160292 | 160292 | -4636 | 33002 | AN8783 |
| 2121 | CONTIG161 | 162384 | 163178 | 0.86 | 1.35E-01 | transcription_start_site | - | 160292 | 160292 | -2489 | 33002 | AN8783 |
| 2121 | CONTIG161 | 162384 | 163178 | 0.86 | 1.35E-01 | transcription_start_site | - | 158236 | 158236 | -4545 | 33003 | AN8783 |
| 569  | CONTIG161 | 164789 | 165068 | 2.23 | 1.80E-02 | transcription_start_site | - | 164368 | 164368 | -560  | 33007 | AN8785 |
| 569  | CONTIG161 | 164789 | 165068 | 2.23 | 1.80E-02 | transcription_start_site | - | 164119 | 164119 | -809  | 33008 | AN8785 |
| 569  | CONTIG161 | 164789 | 165068 | 2.23 | 1.80E-02 | transcription_start_site | - | 162862 | 162862 | -2066 | 33009 | AN8785 |
| 952  | CONTIG161 | 167104 | 167685 | 1.77 | 5.36E-02 | transcription_start_site | - | 164368 | 164368 | -3026 | 33007 | AN8785 |
| 952  | CONTIG161 | 167104 | 167685 | 1.77 | 5.36E-02 | transcription_start_site | - | 164119 | 164119 | -3275 | 33008 | AN8785 |
| 952  | CONTIG161 | 167104 | 167685 | 1.77 | 5.36E-02 | transcription_start_site | - | 162862 | 162862 | -4532 | 33009 | AN8785 |
| 2121 | CONTIG161 | 162384 | 163178 | 0.86 | 1.35E-01 | transcription_start_site | - | 162862 | 162862 | 81    | 33009 | AN8785 |
| 2121 | CONTIG161 | 162384 | 163178 | 0.86 | 1.35E-01 | transcription_start_site | - | 164119 | 164119 | 1338  | 33008 | AN8785 |
| 569  | CONTIG161 | 164789 | 165068 | 2.23 | 1.80E-02 | transcription_start_site | - | 165134 | 165134 | 205   | 33013 | AN8786 |
| 569  | CONTIG161 | 164789 | 165068 | 2.23 | 1.80E-02 | transcription_start_site | - | 165381 | 165381 | 452   | 33012 | AN8786 |
| 569  | CONTIG161 | 164789 | 165068 | 2.23 | 1.80E-02 | transcription_start_site | - | 165514 | 165514 | 585   | 33011 | AN8786 |
| 952  | CONTIG161 | 167104 | 167685 | 1.77 | 5.36E-02 | transcription_start_site | - | 166435 | 166435 | -959  | 33010 | AN8786 |
| 952  | CONTIG161 | 167104 | 167685 | 1.77 | 5.36E-02 | transcription_start_site | - | 165514 | 165514 | -1880 | 33011 | AN8786 |
| 952  | CONTIG161 | 167104 | 167685 | 1.77 | 5.36E-02 | transcription_start_site | - | 165381 | 165381 | -2013 | 33012 | AN8786 |
| 952  | CONTIG161 | 167104 | 167685 | 1.77 | 5.36E-02 | transcription_start_site | - | 165134 | 165134 | -2260 | 33013 | AN8786 |
| 952  | CONTIG161 | 167104 | 167685 | 1.77 | 5.36E-02 | transcription_start_site | - | 168041 | 168041 | 646   | 33017 | AN8787 |
| 952  | CONTIG161 | 167104 | 167685 | 1.77 | 5.36E-02 | transcription_start_site | - | 168560 | 168560 | 1165  | 33016 | AN8787 |
| 952  | CONTIG161 | 167104 | 167685 | 1.77 | 5.36E-02 | transcription_start_site | + | 172055 | 172055 | -4660 | 33018 | AN8788 |
| 1324 | CONTIG161 | 177915 | 178346 | 1.42 | 5.43E-02 | transcription_start_site | - | 175367 | 175367 | -2763 | 33021 | AN8789 |
| 1324 | CONTIG161 | 177915 | 178346 | 1.42 | 5.43E-02 | transcription_start_site | - | 175217 | 175217 | -2913 | 33022 | AN8789 |
| 1324 | CONTIG161 | 177915 | 178346 | 1.42 | 5.43E-02 | transcription_start_site | - | 177524 | 177524 | -606  | 33023 | AN8790 |
| 1324 | CONTIG161 | 177915 | 178346 | 1.42 | 5.43E-02 | transcription_start_site | - | 176942 | 176942 | -1188 | 33024 | AN8790 |
| 1324 | CONTIG161 | 177915 | 178346 | 1.42 | 5.43E-02 | transcription_start_site | - | 179131 | 179131 | 1000  | 33026 | AN8791 |
| 1324 | CONTIG161 | 177915 | 178346 | 1.42 | 5.43E-02 | transcription_start_site | + | 183260 | 183260 | -5129 | 33029 | AN8793 |
| 720  | CONTIG161 | 196878 | 197387 | 2.03 | 3.01E-02 | transcription_start_site | - | 193230 | 193230 | -3902 | 33041 | AN8796 |
| 720  | CONTIG161 | 196878 | 197387 | 2.03 | 3.01E-02 | transcription_start_site | - | 192965 | 192965 | -4167 | 33042 | AN8796 |
| 720  | CONTIG161 | 196878 | 197387 | 2.03 | 3.01E-02 | transcription_start_site | - | 195653 | 195653 | -1479 | 33043 | AN8797 |
| 720  | CONTIG161 | 196878 | 197387 | 2.03 | 3.01E-02 | transcription_start_site | - | 195222 | 195222 | -1910 | 33044 | AN8797 |
| 720  | CONTIG161 | 196878 | 197387 | 2.03 | 3.01E-02 | transcription_start_site | - | 194608 | 194608 | -2524 | 33045 | AN8797 |
| 720  | CONTIG161 | 196878 | 197387 | 2.03 | 3.01E-02 | transcription_start_site | - | 194039 | 194039 | -3093 | 33046 | AN8797 |
| 720  | CONTIG161 | 196878 | 197387 | 2.03 | 3.01E-02 | transcription_start_site | + | 198449 | 198449 | -1316 | 33047 | AN8798 |
| 720  | CONTIG161 | 196878 | 197387 | 2.03 | 3.01E-02 | transcription_start_site | + | 201057 | 201057 | -3924 | 33048 | AN8798 |
| 1000 | CONTIG161 | 233106 | 233451 | 1.72 | 6.04E-02 | transcription_start_site | - | 231442 | 231442 | -1836 | 33082 | AN8811 |
| 1000 | CONTIG161 | 233106 | 233451 | 1.72 | 6.04E-02 | transcription_start_site | - | 231286 | 231286 | -1992 | 33083 | AN8811 |
| 1000 | CONTIG161 | 233106 | 233451 | 1.72 | 6.04E-02 | transcription_start_site | + | 233170 | 233170 | 108   | 33084 | AN8812 |

|      |           |        |        |      |          |                          |   |        |        |       |       |        |
|------|-----------|--------|--------|------|----------|--------------------------|---|--------|--------|-------|-------|--------|
| 1000 | CONTIG161 | 233106 | 233451 | 1.72 | 6.04E-02 | transcription_start_site | + | 233574 | 233574 | -295  | 33085 | AN8812 |
| 1000 | CONTIG161 | 233106 | 233451 | 1.72 | 6.04E-02 | transcription_start_site | + | 233771 | 233771 | -492  | 33086 | AN8812 |
| 1000 | CONTIG161 | 233106 | 233451 | 1.72 | 6.04E-02 | transcription_start_site | + | 234047 | 234047 | -768  | 33087 | AN8812 |
| 1000 | CONTIG161 | 233106 | 233451 | 1.72 | 6.04E-02 | transcription_start_site | + | 234278 | 234278 | -999  | 33088 | AN8812 |
| 125  | CONTIG161 | 251777 | 252056 | 3.04 | 1.77E-03 | transcription_start_site | + | 252691 | 252691 | -774  | 33103 | AN8815 |
| 125  | CONTIG161 | 251777 | 252056 | 3.04 | 1.77E-03 | transcription_start_site | + | 252860 | 252860 | -943  | 33104 | AN8815 |
| 125  | CONTIG161 | 251777 | 252056 | 3.04 | 1.77E-03 | transcription_start_site | + | 253197 | 253197 | -1280 | 33105 | AN8815 |
| 125  | CONTIG161 | 251777 | 252056 | 3.04 | 1.77E-03 | transcription_start_site | + | 253579 | 253579 | -1662 | 33106 | AN8815 |
| 125  | CONTIG161 | 251777 | 252056 | 3.04 | 1.77E-03 | transcription_start_site | + | 254277 | 254277 | -2360 | 33107 | AN8816 |
| 125  | CONTIG161 | 251777 | 252056 | 3.04 | 1.77E-03 | transcription_start_site | + | 254677 | 254677 | -2760 | 33108 | AN8816 |
| 125  | CONTIG161 | 251777 | 252056 | 3.04 | 1.77E-03 | transcription_start_site | + | 254844 | 254844 | -2927 | 33109 | AN8816 |
| 125  | CONTIG161 | 251777 | 252056 | 3.04 | 1.77E-03 | transcription_start_site | + | 255011 | 255011 | -3094 | 33110 | AN8816 |
| 125  | CONTIG161 | 251777 | 252056 | 3.04 | 1.77E-03 | transcription_start_site | + | 256268 | 256268 | -4351 | 33111 | AN8816 |
| 1381 | CONTIG161 | 259817 | 260241 | 1.37 | 8.54E-02 | transcription_start_site | + | 260682 | 260682 | -653  | 33112 | AN8817 |
| 1381 | CONTIG161 | 259817 | 260241 | 1.37 | 8.54E-02 | transcription_start_site | + | 261009 | 261009 | -980  | 33113 | AN8817 |
| 2046 | CONTIG162 | 7671   | 8395   | 0.92 | 1.97E-01 | transcription_start_site | - | 5690   | 5690   | -2343 | 33127 | AN8822 |
| 2046 | CONTIG162 | 7671   | 8395   | 0.92 | 1.97E-01 | transcription_start_site | + | 8131   | 8131   | -98   | 33130 | AN8823 |
| 2046 | CONTIG162 | 7671   | 8395   | 0.92 | 1.97E-01 | transcription_start_site | + | 7586   | 7586   | 447   | 33129 | AN8823 |
| 2046 | CONTIG162 | 7671   | 8395   | 0.92 | 1.97E-01 | transcription_start_site | + | 8777   | 8777   | -744  | 33131 | AN8823 |
| 2046 | CONTIG162 | 7671   | 8395   | 0.92 | 1.97E-01 | transcription_start_site | + | 7265   | 7265   | 768   | 33128 | AN8823 |
| 2046 | CONTIG162 | 7671   | 8395   | 0.92 | 1.97E-01 | transcription_start_site | + | 8916   | 8916   | -883  | 33132 | AN8823 |
| 2046 | CONTIG162 | 7671   | 8395   | 0.92 | 1.97E-01 | transcription_start_site | + | 10585  | 10585  | -2552 | 33133 | AN8823 |
| 2046 | CONTIG162 | 7671   | 8395   | 0.92 | 1.97E-01 | transcription_start_site | + | 10737  | 10737  | -2704 | 33134 | AN8823 |
| 2046 | CONTIG162 | 7671   | 8395   | 0.92 | 1.97E-01 | transcription_start_site | + | 12021  | 12021  | -3988 | 33135 | AN8824 |
| 2046 | CONTIG162 | 7671   | 8395   | 0.92 | 1.97E-01 | transcription_start_site | + | 12112  | 12112  | -4079 | 33136 | AN8824 |
| 2046 | CONTIG162 | 7671   | 8395   | 0.92 | 1.97E-01 | transcription_start_site | + | 12240  | 12240  | -4207 | 33137 | AN8824 |
| 2046 | CONTIG162 | 7671   | 8395   | 0.92 | 1.97E-01 | transcription_start_site | + | 12398  | 12398  | -4365 | 33138 | AN8824 |
| 2046 | CONTIG162 | 7671   | 8395   | 0.92 | 1.97E-01 | transcription_start_site | + | 12652  | 12652  | -4619 | 33139 | AN8824 |
| 595  | CONTIG162 | 31580  | 32009  | 2.19 | 1.09E-03 | transcription_start_site | - | 27311  | 27311  | -4483 | 33147 | AN8827 |
| 595  | CONTIG162 | 31580  | 32009  | 2.19 | 1.09E-03 | transcription_start_site | - | 27121  | 27121  | -4673 | 33148 | AN8827 |
| 595  | CONTIG162 | 31580  | 32009  | 2.19 | 1.09E-03 | transcription_start_site | - | 26983  | 26983  | -4811 | 33149 | AN8827 |
| 595  | CONTIG162 | 31580  | 32009  | 2.19 | 1.09E-03 | transcription_start_site | - | 26783  | 26783  | -5011 | 33150 | AN8827 |
| 748  | CONTIG162 | 29704  | 30279  | 2    | 7.08E-03 | transcription_start_site | - | 27311  | 27311  | -2680 | 33147 | AN8827 |
| 748  | CONTIG162 | 29704  | 30279  | 2    | 7.08E-03 | transcription_start_site | - | 27121  | 27121  | -2870 | 33148 | AN8827 |
| 748  | CONTIG162 | 29704  | 30279  | 2    | 7.08E-03 | transcription_start_site | - | 26983  | 26983  | -3008 | 33149 | AN8827 |
| 748  | CONTIG162 | 29704  | 30279  | 2    | 7.08E-03 | transcription_start_site | - | 26783  | 26783  | -3208 | 33150 | AN8827 |
| 748  | CONTIG162 | 29704  | 30279  | 2    | 7.08E-03 | transcription_start_site | - | 25942  | 25942  | -4049 | 33151 | AN8827 |
| 748  | CONTIG162 | 29704  | 30279  | 2    | 7.08E-03 | transcription_start_site | - | 25756  | 25756  | -4235 | 33152 | AN8827 |
| 595  | CONTIG162 | 31580  | 32009  | 2.19 | 1.09E-03 | transcription_start_site | - | 29598  | 29598  | -2196 | 33158 | AN8829 |
| 595  | CONTIG162 | 31580  | 32009  | 2.19 | 1.09E-03 | transcription_start_site | - | 29319  | 29319  | -2475 | 33159 | AN8829 |
| 625  | CONTIG162 | 33545  | 33819  | 2.15 | 4.01E-03 | transcription_start_site | - | 29598  | 29598  | -4084 | 33158 | AN8829 |
| 625  | CONTIG162 | 33545  | 33819  | 2.15 | 4.01E-03 | transcription_start_site | - | 29319  | 29319  | -4363 | 33159 | AN8829 |
| 748  | CONTIG162 | 29704  | 30279  | 2    | 7.08E-03 | transcription_start_site | - | 29598  | 29598  | -393  | 33158 | AN8829 |
| 748  | CONTIG162 | 29704  | 30279  | 2    | 7.08E-03 | transcription_start_site | - | 29319  | 29319  | -672  | 33159 | AN8829 |
| 595  | CONTIG162 | 31580  | 32009  | 2.19 | 1.09E-03 | transcription_start_site | + | 34528  | 34528  | -2733 | 33160 | AN8830 |
| 595  | CONTIG162 | 31580  | 32009  | 2.19 | 1.09E-03 | transcription_start_site | + | 36027  | 36027  | -4232 | 33161 | AN8830 |
| 625  | CONTIG162 | 33545  | 33819  | 2.15 | 4.01E-03 | transcription_start_site | + | 34528  | 34528  | -846  | 33160 | AN8830 |
| 625  | CONTIG162 | 33545  | 33819  | 2.15 | 4.01E-03 | transcription_start_site | + | 36027  | 36027  | -2345 | 33161 | AN8830 |
| 748  | CONTIG162 | 29704  | 30279  | 2    | 7.08E-03 | transcription_start_site | + | 34528  | 34528  | -4536 | 33160 | AN8830 |
| 1137 | CONTIG162 | 36844  | 37418  | 1.58 | 2.63E-02 | transcription_start_site | + | 36027  | 36027  | 1104  | 33161 | AN8830 |
| 1137 | CONTIG162 | 36844  | 37418  | 1.58 | 2.63E-02 | transcription_start_site | + | 41475  | 41475  | -4344 | 33162 | AN8831 |
| 1137 | CONTIG162 | 36844  | 37418  | 1.58 | 2.63E-02 | transcription_start_site | + | 41592  | 41592  | -4461 | 33163 | AN8831 |
| 1137 | CONTIG162 | 36844  | 37418  | 1.58 | 2.63E-02 | transcription_start_site | + | 41795  | 41795  | -4664 | 33164 | AN8831 |
| 2138 | CONTIG162 | 39452  | 40343  | 0.85 | 1.81E-01 | transcription_start_site | + | 41475  | 41475  | -1577 | 33162 | AN8831 |
| 2138 | CONTIG162 | 39452  | 40343  | 0.85 | 1.81E-01 | transcription_start_site | + | 41592  | 41592  | -1694 | 33163 | AN8831 |
| 2138 | CONTIG162 | 39452  | 40343  | 0.85 | 1.81E-01 | transcription_start_site | + | 41795  | 41795  | -1897 | 33164 | AN8831 |
| 2138 | CONTIG162 | 39452  | 40343  | 0.85 | 1.81E-01 | transcription_start_site | + | 44789  | 44789  | -4891 | 33166 | AN8833 |

|      |           |       |       |      |          |                          |   |       |       |       |       |        |
|------|-----------|-------|-------|------|----------|--------------------------|---|-------|-------|-------|-------|--------|
| 2138 | CONTIG162 | 39452 | 40343 | 0.85 | 1.81E-01 | transcription_start_site | + | 44971 | 44971 | -5073 | 33167 | AN8833 |
| 989  | CONTIG162 | 56103 | 56387 | 1.73 | 1.54E-02 | transcription_start_site | - | 55839 | 55839 | -406  | 33169 | AN8836 |
| 989  | CONTIG162 | 56103 | 56387 | 1.73 | 1.54E-02 | transcription_start_site | - | 55563 | 55563 | -682  | 33170 | AN8836 |
| 989  | CONTIG162 | 56103 | 56387 | 1.73 | 1.54E-02 | transcription_start_site | - | 53774 | 53774 | -2471 | 33171 | AN8836 |
| 989  | CONTIG162 | 56103 | 56387 | 1.73 | 1.54E-02 | transcription_start_site | - | 53623 | 53623 | -2622 | 33172 | AN8836 |
| 1317 | CONTIG163 | 1966  | 2535  | 1.42 | 1.20E-03 | transcription_start_site | + | 4010  | 4010  | -1759 | 33176 | AN8839 |
| 1317 | CONTIG163 | 1966  | 2535  | 1.42 | 1.20E-03 | transcription_start_site | + | 4576  | 4576  | -2325 | 33177 | AN8839 |
| 2260 | CONTIG163 | 6687  | 7116  | 0.72 | 9.60E-02 | transcription_start_site | - | 7216  | 7216  | 314   | 33180 | AN8840 |
| 2260 | CONTIG163 | 6687  | 7116  | 0.72 | 9.60E-02 | transcription_start_site | - | 7395  | 7395  | 493   | 33179 | AN8840 |
| 2313 | CONTIG163 | 7887  | 9351  | 0.65 | 1.38E-01 | transcription_start_site | - | 8462  | 8462  | -157  | 33178 | AN8840 |
| 2313 | CONTIG163 | 7887  | 9351  | 0.65 | 1.38E-01 | transcription_start_site | - | 7395  | 7395  | -1224 | 33179 | AN8840 |
| 2313 | CONTIG163 | 7887  | 9351  | 0.65 | 1.38E-01 | transcription_start_site | - | 7216  | 7216  | -1403 | 33180 | AN8840 |
| 2260 | CONTIG163 | 6687  | 7116  | 0.72 | 9.60E-02 | transcription_start_site | + | 9292  | 9292  | -2390 | 33181 | AN8841 |
| 2313 | CONTIG163 | 7887  | 9351  | 0.65 | 1.38E-01 | transcription_start_site | + | 9292  | 9292  | -673  | 33181 | AN8841 |
| 2140 | CONTIG163 | 20195 | 20454 | 0.84 | 5.36E-02 | transcription_start_site | - | 20135 | 20135 | -189  | 33187 | AN8844 |
| 2140 | CONTIG163 | 20195 | 20454 | 0.84 | 5.36E-02 | transcription_start_site | - | 19966 | 19966 | -358  | 33188 | AN8844 |
| 2140 | CONTIG163 | 20195 | 20454 | 0.84 | 5.36E-02 | transcription_start_site | - | 19817 | 19817 | -507  | 33189 | AN8844 |
| 2140 | CONTIG163 | 20195 | 20454 | 0.84 | 5.36E-02 | transcription_start_site | - | 19694 | 19694 | -630  | 33190 | AN8844 |
| 2140 | CONTIG163 | 20195 | 20454 | 0.84 | 5.36E-02 | transcription_start_site | + | 20957 | 20957 | -632  | 33191 | AN8845 |
| 2140 | CONTIG163 | 20195 | 20454 | 0.84 | 5.36E-02 | transcription_start_site | + | 24003 | 24003 | -3678 | 33192 | AN8846 |
| 2140 | CONTIG163 | 20195 | 20454 | 0.84 | 5.36E-02 | transcription_start_site | + | 24089 | 24089 | -3764 | 33193 | AN8846 |
| 2338 | CONTIG163 | 35270 | 35609 | 0.6  | 1.76E-01 | transcription_start_site | - | 32677 | 32677 | -2762 | 33201 | AN8850 |
| 2338 | CONTIG163 | 35270 | 35609 | 0.6  | 1.76E-01 | transcription_start_site | - | 32203 | 32203 | -3236 | 33202 | AN8850 |
| 2338 | CONTIG163 | 35270 | 35609 | 0.6  | 1.76E-01 | transcription_start_site | - | 31962 | 31962 | -3477 | 33203 | AN8850 |
| 2338 | CONTIG163 | 35270 | 35609 | 0.6  | 1.76E-01 | transcription_start_site | - | 35112 | 35112 | -327  | 33204 | AN8851 |
| 2338 | CONTIG163 | 35270 | 35609 | 0.6  | 1.76E-01 | transcription_start_site | - | 34929 | 34929 | -510  | 33205 | AN8851 |
| 2338 | CONTIG163 | 35270 | 35609 | 0.6  | 1.76E-01 | transcription_start_site | - | 34709 | 34709 | -730  | 33206 | AN8851 |
| 2338 | CONTIG163 | 35270 | 35609 | 0.6  | 1.76E-01 | transcription_start_site | - | 34018 | 34018 | -1421 | 33207 | AN8851 |
| 2338 | CONTIG163 | 35270 | 35609 | 0.6  | 1.76E-01 | transcription_start_site | - | 33736 | 33736 | -1703 | 33208 | AN8851 |
| 1728 | CONTIG163 | 42165 | 42602 | 1.11 | 5.38E-03 | transcription_start_site | - | 41849 | 41849 | -534  | 33209 | AN8853 |
| 1728 | CONTIG163 | 42165 | 42602 | 1.11 | 5.38E-03 | transcription_start_site | - | 41668 | 41668 | -715  | 33210 | AN8853 |
| 1728 | CONTIG163 | 42165 | 42602 | 1.11 | 5.38E-03 | transcription_start_site | - | 41562 | 41562 | -821  | 33211 | AN8853 |
| 1728 | CONTIG163 | 42165 | 42602 | 1.11 | 5.38E-03 | transcription_start_site | - | 40377 | 40377 | -2006 | 33212 | AN8853 |
| 1728 | CONTIG163 | 42165 | 42602 | 1.11 | 5.38E-03 | transcription_start_site | + | 43481 | 43481 | -1097 | 33213 | AN8854 |
| 1728 | CONTIG163 | 42165 | 42602 | 1.11 | 5.38E-03 | transcription_start_site | + | 43696 | 43696 | -1312 | 33214 | AN8854 |
| 1728 | CONTIG163 | 42165 | 42602 | 1.11 | 5.38E-03 | transcription_start_site | + | 44455 | 44455 | -2071 | 33215 | AN8854 |
| 1728 | CONTIG163 | 42165 | 42602 | 1.11 | 5.38E-03 | transcription_start_site | + | 44593 | 44593 | -2209 | 33216 | AN8854 |
| 1728 | CONTIG163 | 42165 | 42602 | 1.11 | 5.38E-03 | transcription_start_site | + | 44824 | 44824 | -2440 | 33217 | AN8854 |
| 1728 | CONTIG163 | 42165 | 42602 | 1.11 | 5.38E-03 | transcription_start_site | + | 44936 | 44936 | -2552 | 33218 | AN8854 |
| 1728 | CONTIG163 | 42165 | 42602 | 1.11 | 5.38E-03 | transcription_start_site | + | 46739 | 46739 | -4355 | 33220 | AN8856 |
| 1728 | CONTIG163 | 42165 | 42602 | 1.11 | 5.38E-03 | transcription_start_site | + | 47030 | 47030 | -4646 | 33221 | AN8856 |
| 1728 | CONTIG163 | 42165 | 42602 | 1.11 | 5.38E-03 | transcription_start_site | + | 47164 | 47164 | -4780 | 33222 | AN8856 |
| 1728 | CONTIG163 | 42165 | 42602 | 1.11 | 5.38E-03 | transcription_start_site | + | 47506 | 47506 | -5122 | 33223 | AN8856 |
| 2276 | CONTIG163 | 55596 | 55865 | 0.7  | 1.08E-01 | transcription_start_site | - | 52412 | 52412 | -3318 | 33227 | AN8858 |
| 2276 | CONTIG163 | 55596 | 55865 | 0.7  | 1.08E-01 | transcription_start_site | - | 55500 | 55500 | -230  | 33228 | AN8859 |
| 2276 | CONTIG163 | 55596 | 55865 | 0.7  | 1.08E-01 | transcription_start_site | - | 55295 | 55295 | -435  | 33229 | AN8859 |
| 2276 | CONTIG163 | 55596 | 55865 | 0.7  | 1.08E-01 | transcription_start_site | - | 55133 | 55133 | -597  | 33230 | AN8859 |
| 2276 | CONTIG163 | 55596 | 55865 | 0.7  | 1.08E-01 | transcription_start_site | - | 53827 | 53827 | -1903 | 33231 | AN8859 |
| 2276 | CONTIG163 | 55596 | 55865 | 0.7  | 1.08E-01 | transcription_start_site | + | 58079 | 58079 | -2348 | 33232 | AN8860 |
| 2276 | CONTIG163 | 55596 | 55865 | 0.7  | 1.08E-01 | transcription_start_site | + | 58332 | 58332 | -2601 | 33233 | AN8860 |
| 2276 | CONTIG163 | 55596 | 55865 | 0.7  | 1.08E-01 | transcription_start_site | + | 58549 | 58549 | -2818 | 33234 | AN8860 |
| 2288 | CONTIG163 | 67805 | 68482 | 0.68 | 7.38E-02 | transcription_start_site | - | 65093 | 65093 | -3050 | 33241 | AN8862 |
| 2288 | CONTIG163 | 67805 | 68482 | 0.68 | 7.38E-02 | transcription_start_site | - | 64912 | 64912 | -3231 | 33242 | AN8862 |
| 2288 | CONTIG163 | 67805 | 68482 | 0.68 | 7.38E-02 | transcription_start_site | - | 64730 | 64730 | -3413 | 33243 | AN8862 |
| 2288 | CONTIG163 | 67805 | 68482 | 0.68 | 7.38E-02 | transcription_start_site | - | 64483 | 64483 | -3660 | 33244 | AN8862 |
| 2346 | CONTIG163 | 65180 | 65694 | 0.58 | 1.97E-01 | transcription_start_site | - | 65093 | 65093 | -344  | 33241 | AN8862 |
| 2346 | CONTIG163 | 65180 | 65694 | 0.58 | 1.97E-01 | transcription_start_site | - | 64912 | 64912 | -525  | 33242 | AN8862 |

|      |           |       |       |      |          |                          |   |       |       |       |       |        |
|------|-----------|-------|-------|------|----------|--------------------------|---|-------|-------|-------|-------|--------|
| 2346 | CONTIG163 | 65180 | 65694 | 0.58 | 1.97E-01 | transcription_start_site | - | 64730 | 64730 | -707  | 33243 | AN8862 |
| 2346 | CONTIG163 | 65180 | 65694 | 0.58 | 1.97E-01 | transcription_start_site | - | 64483 | 64483 | -954  | 33244 | AN8862 |
| 2346 | CONTIG163 | 65180 | 65694 | 0.58 | 1.97E-01 | transcription_start_site | - | 60579 | 60579 | -4858 | 33245 | AN8862 |
| 2346 | CONTIG163 | 65180 | 65694 | 0.58 | 1.97E-01 | transcription_start_site | - | 60458 | 60458 | -4979 | 33246 | AN8862 |
| 2346 | CONTIG163 | 65180 | 65694 | 0.58 | 1.97E-01 | transcription_start_site | - | 60197 | 60197 | -5240 | 33247 | AN8862 |
| 2288 | CONTIG163 | 67805 | 68482 | 0.68 | 7.38E-02 | transcription_start_site | - | 67620 | 67620 | -523  | 33248 | AN8863 |
| 2288 | CONTIG163 | 67805 | 68482 | 0.68 | 7.38E-02 | transcription_start_site | - | 67487 | 67487 | -656  | 33249 | AN8863 |
| 2288 | CONTIG163 | 67805 | 68482 | 0.68 | 7.38E-02 | transcription_start_site | - | 67343 | 67343 | -800  | 33250 | AN8863 |
| 2288 | CONTIG163 | 67805 | 68482 | 0.68 | 7.38E-02 | transcription_start_site | - | 66580 | 66580 | -1563 | 33251 | AN8863 |
| 2288 | CONTIG163 | 67805 | 68482 | 0.68 | 7.38E-02 | transcription_start_site | - | 66180 | 66180 | -1963 | 33252 | AN8863 |
| 2346 | CONTIG163 | 65180 | 65694 | 0.58 | 1.97E-01 | transcription_start_site | - | 66180 | 66180 | 743   | 33252 | AN8863 |
| 2346 | CONTIG163 | 65180 | 65694 | 0.58 | 1.97E-01 | transcription_start_site | - | 66580 | 66580 | 1143  | 33251 | AN8863 |
| 2288 | CONTIG163 | 67805 | 68482 | 0.68 | 7.38E-02 | transcription_start_site | + | 68566 | 68566 | -422  | 33253 | AN8864 |
| 2288 | CONTIG163 | 67805 | 68482 | 0.68 | 7.38E-02 | transcription_start_site | + | 68704 | 68704 | -560  | 33254 | AN8864 |
| 2288 | CONTIG163 | 67805 | 68482 | 0.68 | 7.38E-02 | transcription_start_site | + | 68798 | 68798 | -654  | 33255 | AN8864 |
| 2288 | CONTIG163 | 67805 | 68482 | 0.68 | 7.38E-02 | transcription_start_site | + | 69376 | 69376 | -1232 | 33256 | AN8864 |
| 2288 | CONTIG163 | 67805 | 68482 | 0.68 | 7.38E-02 | transcription_start_site | + | 69763 | 69763 | -1619 | 33257 | AN8864 |
| 2288 | CONTIG163 | 67805 | 68482 | 0.68 | 7.38E-02 | transcription_start_site | + | 69944 | 69944 | -1800 | 33258 | AN8864 |
| 2288 | CONTIG163 | 67805 | 68482 | 0.68 | 7.38E-02 | transcription_start_site | + | 70058 | 70058 | -1914 | 33259 | AN8864 |
| 2288 | CONTIG163 | 67805 | 68482 | 0.68 | 7.38E-02 | transcription_start_site | + | 70234 | 70234 | -2090 | 33260 | AN8864 |
| 2288 | CONTIG163 | 67805 | 68482 | 0.68 | 7.38E-02 | transcription_start_site | + | 70626 | 70626 | -2482 | 33261 | AN8864 |
| 2288 | CONTIG163 | 67805 | 68482 | 0.68 | 7.38E-02 | transcription_start_site | + | 70829 | 70829 | -2685 | 33262 | AN8864 |
| 2288 | CONTIG163 | 67805 | 68482 | 0.68 | 7.38E-02 | transcription_start_site | + | 70989 | 70989 | -2845 | 33263 | AN8864 |
| 2288 | CONTIG163 | 67805 | 68482 | 0.68 | 7.38E-02 | transcription_start_site | + | 71389 | 71389 | -3245 | 33264 | AN8864 |
| 2288 | CONTIG163 | 67805 | 68482 | 0.68 | 7.38E-02 | transcription_start_site | + | 71544 | 71544 | -3400 | 33265 | AN8864 |
| 2288 | CONTIG163 | 67805 | 68482 | 0.68 | 7.38E-02 | transcription_start_site | + | 72051 | 72051 | -3907 | 33266 | AN8864 |
| 2288 | CONTIG163 | 67805 | 68482 | 0.68 | 7.38E-02 | transcription_start_site | + | 72243 | 72243 | -4099 | 33267 | AN8864 |
| 2288 | CONTIG163 | 67805 | 68482 | 0.68 | 7.38E-02 | transcription_start_site | + | 72523 | 72523 | -4379 | 33268 | AN8864 |
| 2288 | CONTIG163 | 67805 | 68482 | 0.68 | 7.38E-02 | transcription_start_site | + | 72695 | 72695 | -4551 | 33269 | AN8864 |
| 2288 | CONTIG163 | 67805 | 68482 | 0.68 | 7.38E-02 | transcription_start_site | + | 72796 | 72796 | -4652 | 33270 | AN8864 |
| 2288 | CONTIG163 | 67805 | 68482 | 0.68 | 7.38E-02 | transcription_start_site | + | 72996 | 72996 | -4852 | 33271 | AN8864 |
| 2288 | CONTIG163 | 67805 | 68482 | 0.68 | 7.38E-02 | transcription_start_site | + | 73191 | 73191 | -5047 | 33272 | AN8864 |
| 2346 | CONTIG163 | 65180 | 65694 | 0.58 | 1.97E-01 | transcription_start_site | + | 68566 | 68566 | -3129 | 33253 | AN8864 |
| 2346 | CONTIG163 | 65180 | 65694 | 0.58 | 1.97E-01 | transcription_start_site | + | 68704 | 68704 | -3267 | 33254 | AN8864 |
| 2346 | CONTIG163 | 65180 | 65694 | 0.58 | 1.97E-01 | transcription_start_site | + | 68798 | 68798 | -3361 | 33255 | AN8864 |
| 2346 | CONTIG163 | 65180 | 65694 | 0.58 | 1.97E-01 | transcription_start_site | + | 69376 | 69376 | -3939 | 33256 | AN8864 |
| 2346 | CONTIG163 | 65180 | 65694 | 0.58 | 1.97E-01 | transcription_start_site | + | 69763 | 69763 | -4326 | 33257 | AN8864 |
| 2346 | CONTIG163 | 65180 | 65694 | 0.58 | 1.97E-01 | transcription_start_site | + | 69944 | 69944 | -4507 | 33258 | AN8864 |
| 2346 | CONTIG163 | 65180 | 65694 | 0.58 | 1.97E-01 | transcription_start_site | + | 70058 | 70058 | -4621 | 33259 | AN8864 |
| 2346 | CONTIG163 | 65180 | 65694 | 0.58 | 1.97E-01 | transcription_start_site | + | 70234 | 70234 | -4797 | 33260 | AN8864 |
| 2346 | CONTIG163 | 65180 | 65694 | 0.58 | 1.97E-01 | transcription_start_site | + | 70626 | 70626 | -5189 | 33261 | AN8864 |
| 1630 | CONTIG163 | 78770 | 79272 | 1.18 | 9.96E-03 | transcription_start_site | - | 78492 | 78492 | -529  | 33281 | AN8866 |
| 1630 | CONTIG163 | 78770 | 79272 | 1.18 | 9.96E-03 | transcription_start_site | - | 78114 | 78114 | -907  | 33282 | AN8866 |
| 1630 | CONTIG163 | 78770 | 79272 | 1.18 | 9.96E-03 | transcription_start_site | - | 77742 | 77742 | -1279 | 33283 | AN8866 |
| 1630 | CONTIG163 | 78770 | 79272 | 1.18 | 9.96E-03 | transcription_start_site | - | 77106 | 77106 | -1915 | 33284 | AN8866 |
| 1630 | CONTIG163 | 78770 | 79272 | 1.18 | 9.96E-03 | transcription_start_site | - | 77014 | 77014 | -2007 | 33285 | AN8866 |
| 1630 | CONTIG163 | 78770 | 79272 | 1.18 | 9.96E-03 | transcription_start_site | - | 76898 | 76898 | -2123 | 33286 | AN8866 |
| 1630 | CONTIG163 | 78770 | 79272 | 1.18 | 9.96E-03 | transcription_start_site | - | 76760 | 76760 | -2261 | 33287 | AN8866 |
| 1847 | CONTIG163 | 82521 | 83093 | 1.04 | 8.99E-03 | transcription_start_site | - | 78492 | 78492 | -4315 | 33281 | AN8866 |
| 1847 | CONTIG163 | 82521 | 83093 | 1.04 | 8.99E-03 | transcription_start_site | - | 78114 | 78114 | -4693 | 33282 | AN8866 |
| 1847 | CONTIG163 | 82521 | 83093 | 1.04 | 8.99E-03 | transcription_start_site | - | 77742 | 77742 | -5065 | 33283 | AN8866 |
| 1630 | CONTIG163 | 78770 | 79272 | 1.18 | 9.96E-03 | transcription_start_site | - | 79675 | 79675 | 654   | 33294 | AN8867 |
| 1630 | CONTIG163 | 78770 | 79272 | 1.18 | 9.96E-03 | transcription_start_site | - | 80097 | 80097 | 1076  | 33293 | AN8867 |
| 1630 | CONTIG163 | 78770 | 79272 | 1.18 | 9.96E-03 | transcription_start_site | - | 80242 | 80242 | 1221  | 33292 | AN8867 |
| 1847 | CONTIG163 | 82521 | 83093 | 1.04 | 8.99E-03 | transcription_start_site | - | 81266 | 81266 | -1541 | 33288 | AN8867 |
| 1847 | CONTIG163 | 82521 | 83093 | 1.04 | 8.99E-03 | transcription_start_site | - | 81072 | 81072 | -1735 | 33289 | AN8867 |
| 1847 | CONTIG163 | 82521 | 83093 | 1.04 | 8.99E-03 | transcription_start_site | - | 80940 | 80940 | -1867 | 33290 | AN8867 |

|                |       |       |      |          |                          |   |       |       |       |       |        |
|----------------|-------|-------|------|----------|--------------------------|---|-------|-------|-------|-------|--------|
| 1847 CONTIG163 | 82521 | 83093 | 1.04 | 8.99E-03 | transcription_start_site | - | 80716 | 80716 | -2091 | 33291 | AN8867 |
| 1847 CONTIG163 | 82521 | 83093 | 1.04 | 8.99E-03 | transcription_start_site | - | 80242 | 80242 | -2565 | 33292 | AN8867 |
| 1847 CONTIG163 | 82521 | 83093 | 1.04 | 8.99E-03 | transcription_start_site | - | 80097 | 80097 | -2710 | 33293 | AN8867 |
| 1847 CONTIG163 | 82521 | 83093 | 1.04 | 8.99E-03 | transcription_start_site | - | 79675 | 79675 | -3132 | 33294 | AN8867 |
| 1847 CONTIG163 | 82521 | 83093 | 1.04 | 8.99E-03 | transcription_start_site | - | 82556 | 82556 | -251  | 33295 | AN8868 |
| 1847 CONTIG163 | 82521 | 83093 | 1.04 | 8.99E-03 | transcription_start_site | - | 82447 | 82447 | -360  | 33296 | AN8868 |
| 1847 CONTIG163 | 82521 | 83093 | 1.04 | 8.99E-03 | transcription_start_site | - | 82254 | 82254 | -553  | 33297 | AN8868 |
| 1847 CONTIG163 | 82521 | 83093 | 1.04 | 8.99E-03 | transcription_start_site | - | 82071 | 82071 | -736  | 33298 | AN8868 |
| 1485 CONTIG163 | 88146 | 88498 | 1.28 | 6.24E-03 | transcription_start_site | + | 87313 | 87313 | 1009  | 33302 | AN8869 |
| 1847 CONTIG163 | 82521 | 83093 | 1.04 | 8.99E-03 | transcription_start_site | + | 86454 | 86454 | -3647 | 33299 | AN8869 |
| 1847 CONTIG163 | 82521 | 83093 | 1.04 | 8.99E-03 | transcription_start_site | + | 86676 | 86676 | -3869 | 33300 | AN8869 |
| 1847 CONTIG163 | 82521 | 83093 | 1.04 | 8.99E-03 | transcription_start_site | + | 87086 | 87086 | -4279 | 33301 | AN8869 |
| 1847 CONTIG163 | 82521 | 83093 | 1.04 | 8.99E-03 | transcription_start_site | + | 87313 | 87313 | -4506 | 33302 | AN8869 |
| 1485 CONTIG163 | 88146 | 88498 | 1.28 | 6.24E-03 | transcription_start_site | + | 89153 | 89153 | -831  | 33303 | AN8870 |
| 1485 CONTIG163 | 88146 | 88498 | 1.28 | 6.24E-03 | transcription_start_site | + | 89237 | 89237 | -915  | 33304 | AN8870 |
| 1485 CONTIG163 | 88146 | 88498 | 1.28 | 6.24E-03 | transcription_start_site | + | 89372 | 89372 | -1050 | 33305 | AN8870 |
| 1485 CONTIG163 | 88146 | 88498 | 1.28 | 6.24E-03 | transcription_start_site | + | 89470 | 89470 | -1148 | 33306 | AN8870 |
| 1485 CONTIG163 | 88146 | 88498 | 1.28 | 6.24E-03 | transcription_start_site | + | 90022 | 90022 | -1700 | 33307 | AN8870 |
| 1868 CONTIG164 | 16437 | 16706 | 1.03 | 9.60E-02 | transcription_start_site | + | 16844 | 16844 | -272  | 33309 | AN8874 |
| 1868 CONTIG164 | 16437 | 16706 | 1.03 | 9.60E-02 | transcription_start_site | + | 17008 | 17008 | -436  | 33310 | AN8874 |
| 1868 CONTIG164 | 16437 | 16706 | 1.03 | 9.60E-02 | transcription_start_site | + | 19040 | 19040 | -2468 | 33311 | AN8874 |
| 1039 CONTIG164 | 43295 | 43635 | 1.68 | 9.96E-03 | transcription_start_site | - | 41584 | 41584 | -1881 | 33330 | AN8881 |
| 1039 CONTIG164 | 43295 | 43635 | 1.68 | 9.96E-03 | transcription_start_site | - | 41419 | 41419 | -2046 | 33331 | AN8881 |
| 1551 CONTIG164 | 41869 | 42818 | 1.23 | 1.35E-02 | transcription_start_site | - | 41584 | 41584 | -759  | 33330 | AN8881 |
| 1551 CONTIG164 | 41869 | 42818 | 1.23 | 1.35E-02 | transcription_start_site | - | 41419 | 41419 | -924  | 33331 | AN8881 |
| 2087 CONTIG164 | 40142 | 40716 | 0.89 | 1.54E-01 | transcription_start_site | - | 41419 | 41419 | 990   | 33331 | AN8881 |
| 2087 CONTIG164 | 40142 | 40716 | 0.89 | 1.54E-01 | transcription_start_site | - | 41584 | 41584 | 1155  | 33330 | AN8881 |
| 1039 CONTIG164 | 43295 | 43635 | 1.68 | 9.96E-03 | transcription_start_site | + | 43692 | 43692 | -227  | 33332 | AN8882 |
| 1039 CONTIG164 | 43295 | 43635 | 1.68 | 9.96E-03 | transcription_start_site | + | 44019 | 44019 | -554  | 33333 | AN8882 |
| 1551 CONTIG164 | 41869 | 42818 | 1.23 | 1.35E-02 | transcription_start_site | + | 43692 | 43692 | -1348 | 33332 | AN8882 |
| 1551 CONTIG164 | 41869 | 42818 | 1.23 | 1.35E-02 | transcription_start_site | + | 44019 | 44019 | -1675 | 33333 | AN8882 |
| 1604 CONTIG164 | 39687 | 40030 | 1.2  | 5.36E-02 | transcription_start_site | + | 43692 | 43692 | -3833 | 33332 | AN8882 |
| 1604 CONTIG164 | 39687 | 40030 | 1.2  | 5.36E-02 | transcription_start_site | + | 44019 | 44019 | -4160 | 33333 | AN8882 |
| 2087 CONTIG164 | 40142 | 40716 | 0.89 | 1.54E-01 | transcription_start_site | + | 43692 | 43692 | -3263 | 33332 | AN8882 |
| 2087 CONTIG164 | 40142 | 40716 | 0.89 | 1.54E-01 | transcription_start_site | + | 44019 | 44019 | -3590 | 33333 | AN8882 |
| 247 CONTIG164  | 48230 | 48659 | 2.71 | 0.00E+00 | transcription_start_site | - | 45714 | 45714 | -2730 | 33334 | AN8883 |
| 247 CONTIG164  | 48230 | 48659 | 2.71 | 0.00E+00 | transcription_start_site | - | 45588 | 45588 | -2856 | 33335 | AN8883 |
| 247 CONTIG164  | 48230 | 48659 | 2.71 | 0.00E+00 | transcription_start_site | - | 45433 | 45433 | -3011 | 33336 | AN8883 |
| 247 CONTIG164  | 48230 | 48659 | 2.71 | 0.00E+00 | transcription_start_site | - | 45289 | 45289 | -3155 | 33337 | AN8883 |
| 1502 CONTIG164 | 57605 | 58104 | 1.27 | 4.20E-02 | transcription_start_site | - | 56954 | 56954 | -900  | 33338 | AN8885 |
| 1502 CONTIG164 | 57605 | 58104 | 1.27 | 4.20E-02 | transcription_start_site | - | 56821 | 56821 | -1033 | 33339 | AN8885 |
| 1502 CONTIG164 | 57605 | 58104 | 1.27 | 4.20E-02 | transcription_start_site | - | 54114 | 54114 | -3740 | 33340 | AN8885 |
| 1502 CONTIG164 | 57605 | 58104 | 1.27 | 4.20E-02 | transcription_start_site | - | 53976 | 53976 | -3878 | 33341 | AN8885 |
| 2027 CONTIG164 | 60990 | 61277 | 0.93 | 1.38E-01 | transcription_start_site | - | 56954 | 56954 | -4179 | 33338 | AN8885 |
| 2027 CONTIG164 | 60990 | 61277 | 0.93 | 1.38E-01 | transcription_start_site | - | 56821 | 56821 | -4312 | 33339 | AN8885 |
| 1502 CONTIG164 | 57605 | 58104 | 1.27 | 4.20E-02 | transcription_start_site | + | 58531 | 58531 | -676  | 33342 | AN8886 |
| 1502 CONTIG164 | 57605 | 58104 | 1.27 | 4.20E-02 | transcription_start_site | + | 60798 | 60798 | -2943 | 33343 | AN8886 |
| 2027 CONTIG164 | 60990 | 61277 | 0.93 | 1.38E-01 | transcription_start_site | + | 60798 | 60798 | 335   | 33343 | AN8886 |
| 619 CONTIG164  | 80182 | 80545 | 2.16 | 1.09E-03 | transcription_start_site | - | 79756 | 79756 | -607  | 33356 | AN8892 |
| 619 CONTIG164  | 80182 | 80545 | 2.16 | 1.09E-03 | transcription_start_site | - | 79251 | 79251 | -1112 | 33357 | AN8892 |
| 619 CONTIG164  | 80182 | 80545 | 2.16 | 1.09E-03 | transcription_start_site | - | 77875 | 77875 | -2488 | 33358 | AN8892 |
| 619 CONTIG164  | 80182 | 80545 | 2.16 | 1.09E-03 | transcription_start_site | - | 77617 | 77617 | -2746 | 33359 | AN8892 |
| 619 CONTIG164  | 80182 | 80545 | 2.16 | 1.09E-03 | transcription_start_site | - | 76952 | 76952 | -3411 | 33360 | AN8892 |
| 619 CONTIG164  | 80182 | 80545 | 2.16 | 1.09E-03 | transcription_start_site | - | 75590 | 75590 | -4773 | 33361 | AN8892 |
| 619 CONTIG164  | 80182 | 80545 | 2.16 | 1.09E-03 | transcription_start_site | - | 75188 | 75188 | -5175 | 33362 | AN8892 |
| 619 CONTIG164  | 80182 | 80545 | 2.16 | 1.09E-03 | transcription_start_site | - | 81319 | 81319 | 955   | 33366 | AN8893 |
| 619 CONTIG164  | 80182 | 80545 | 2.16 | 1.09E-03 | transcription_start_site | - | 81426 | 81426 | 1062  | 33365 | AN8893 |



|      |           |        |        |      |          |                          |   |        |        |       |       |        |
|------|-----------|--------|--------|------|----------|--------------------------|---|--------|--------|-------|-------|--------|
| 619  | CONTIG164 | 80182  | 80545  | 2.16 | 1.09E-03 | transcription_start_site | - | 81541  | 81541  | 1177  | 33364 | AN8893 |
| 1132 | CONTIG164 | 90007  | 90281  | 1.58 | 1.37E-02 | transcription_start_site | - | 85727  | 85727  | -4417 | 33367 | AN8894 |
| 1132 | CONTIG164 | 90007  | 90281  | 1.58 | 1.37E-02 | transcription_start_site | - | 85452  | 85452  | -4692 | 33368 | AN8894 |
| 1132 | CONTIG164 | 90007  | 90281  | 1.58 | 1.37E-02 | transcription_start_site | - | 85276  | 85276  | -4868 | 33369 | AN8894 |
| 1132 | CONTIG164 | 90007  | 90281  | 1.58 | 1.37E-02 | transcription_start_site | + | 90286  | 90286  | -142  | 33374 | AN8896 |
| 1132 | CONTIG164 | 90007  | 90281  | 1.58 | 1.37E-02 | transcription_start_site | + | 89819  | 89819  | 325   | 33373 | AN8896 |
| 1132 | CONTIG164 | 90007  | 90281  | 1.58 | 1.37E-02 | transcription_start_site | + | 89424  | 89424  | 720   | 33372 | AN8896 |
| 1503 | CONTIG164 | 91292  | 91701  | 1.27 | 4.20E-02 | transcription_start_site | - | 91765  | 91765  | 268   | 33376 | AN8897 |
| 1503 | CONTIG164 | 91292  | 91701  | 1.27 | 4.20E-02 | transcription_start_site | - | 92002  | 92002  | 505   | 33375 | AN8897 |
| 1132 | CONTIG164 | 90007  | 90281  | 1.58 | 1.37E-02 | transcription_start_site | + | 92462  | 92462  | -2318 | 33377 | AN8898 |
| 1503 | CONTIG164 | 91292  | 91701  | 1.27 | 4.20E-02 | transcription_start_site | + | 92462  | 92462  | -965  | 33377 | AN8898 |
| 1296 | CONTIG164 | 104943 | 105596 | 1.44 | 1.06E-02 | transcription_start_site | - | 102115 | 102115 | -3154 | 33384 | AN8902 |
| 1296 | CONTIG164 | 104943 | 105596 | 1.44 | 1.06E-02 | transcription_start_site | - | 101407 | 101407 | -3862 | 33385 | AN8902 |
| 1296 | CONTIG164 | 104943 | 105596 | 1.44 | 1.06E-02 | transcription_start_site | - | 100915 | 100915 | -4354 | 33386 | AN8902 |
| 1296 | CONTIG164 | 104943 | 105596 | 1.44 | 1.06E-02 | transcription_start_site | - | 104710 | 104710 | -559  | 33387 | AN8903 |
| 1296 | CONTIG164 | 104943 | 105596 | 1.44 | 1.06E-02 | transcription_start_site | - | 104337 | 104337 | -932  | 33388 | AN8903 |
| 1296 | CONTIG164 | 104943 | 105596 | 1.44 | 1.06E-02 | transcription_start_site | - | 104156 | 104156 | -1113 | 33389 | AN8903 |
| 1296 | CONTIG164 | 104943 | 105596 | 1.44 | 1.06E-02 | transcription_start_site | - | 103493 | 103493 | -1776 | 33390 | AN8903 |
| 1457 | CONTIG164 | 135684 | 136052 | 1.3  | 3.70E-02 | transcription_start_site | - | 131698 | 131698 | -4170 | 33406 | AN8910 |
| 661  | CONTIG164 | 138694 | 139118 | 2.09 | 1.62E-03 | transcription_start_site | + | 137715 | 137715 | 1191  | 33418 | AN8911 |
| 1457 | CONTIG164 | 135684 | 136052 | 1.3  | 3.70E-02 | transcription_start_site | + | 136311 | 136311 | -443  | 33415 | AN8911 |
| 1457 | CONTIG164 | 135684 | 136052 | 1.3  | 3.70E-02 | transcription_start_site | + | 136494 | 136494 | -626  | 33416 | AN8911 |
| 1457 | CONTIG164 | 135684 | 136052 | 1.3  | 3.70E-02 | transcription_start_site | + | 137277 | 137277 | -1409 | 33417 | AN8911 |
| 1457 | CONTIG164 | 135684 | 136052 | 1.3  | 3.70E-02 | transcription_start_site | + | 137715 | 137715 | -1847 | 33418 | AN8911 |
| 661  | CONTIG164 | 138694 | 139118 | 2.09 | 1.62E-03 | transcription_start_site | + | 139238 | 139238 | -332  | 33419 | AN8912 |
| 661  | CONTIG164 | 138694 | 139118 | 2.09 | 1.62E-03 | transcription_start_site | + | 139602 | 139602 | -696  | 33420 | AN8912 |
| 1457 | CONTIG164 | 135684 | 136052 | 1.3  | 3.70E-02 | transcription_start_site | + | 139238 | 139238 | -3370 | 33419 | AN8912 |
| 1457 | CONTIG164 | 135684 | 136052 | 1.3  | 3.70E-02 | transcription_start_site | + | 139602 | 139602 | -3734 | 33420 | AN8912 |
| 620  | CONTIG164 | 146104 | 146390 | 2.16 | 1.09E-03 | transcription_start_site | - | 141986 | 141986 | -4261 | 33421 | AN8913 |
| 620  | CONTIG164 | 146104 | 146390 | 2.16 | 1.09E-03 | transcription_start_site | - | 141793 | 141793 | -4454 | 33422 | AN8913 |
| 620  | CONTIG164 | 146104 | 146390 | 2.16 | 1.09E-03 | transcription_start_site | + | 145414 | 145414 | 833   | 33424 | AN8914 |
| 620  | CONTIG164 | 146104 | 146390 | 2.16 | 1.09E-03 | transcription_start_site | + | 145221 | 145221 | 1026  | 33423 | AN8914 |
| 620  | CONTIG164 | 146104 | 146390 | 2.16 | 1.09E-03 | transcription_start_site | + | 147952 | 147952 | -1705 | 33425 | AN8915 |
| 620  | CONTIG164 | 146104 | 146390 | 2.16 | 1.09E-03 | transcription_start_site | + | 148006 | 148006 | -1759 | 33426 | AN8915 |
| 620  | CONTIG164 | 146104 | 146390 | 2.16 | 1.09E-03 | transcription_start_site | + | 148610 | 148610 | -2363 | 33427 | AN8915 |
| 620  | CONTIG164 | 146104 | 146390 | 2.16 | 1.09E-03 | transcription_start_site | + | 148929 | 148929 | -2682 | 33428 | AN8915 |
| 620  | CONTIG164 | 146104 | 146390 | 2.16 | 1.09E-03 | transcription_start_site | + | 149593 | 149593 | -3346 | 33429 | AN8915 |
| 706  | CONTIG165 | 50180  | 50604  | 2.04 | 7.63E-04 | transcription_start_site | + | 50553  | 50553  | -161  | 33476 | AN8930 |
| 706  | CONTIG165 | 50180  | 50604  | 2.04 | 7.63E-04 | transcription_start_site | + | 50736  | 50736  | -344  | 33477 | AN8930 |
| 706  | CONTIG165 | 50180  | 50604  | 2.04 | 7.63E-04 | transcription_start_site | + | 51722  | 51722  | -1330 | 33478 | AN8930 |
| 706  | CONTIG165 | 50180  | 50604  | 2.04 | 7.63E-04 | transcription_start_site | + | 53086  | 53086  | -2694 | 33479 | AN8930 |
| 2113 | CONTIG165 | 50645  | 51204  | 0.87 | 1.38E-01 | transcription_start_site | + | 50736  | 50736  | 188   | 33477 | AN8930 |
| 2113 | CONTIG165 | 50645  | 51204  | 0.87 | 1.38E-01 | transcription_start_site | + | 50553  | 50553  | 371   | 33476 | AN8930 |
| 2113 | CONTIG165 | 50645  | 51204  | 0.87 | 1.38E-01 | transcription_start_site | + | 51722  | 51722  | -797  | 33478 | AN8930 |
| 2113 | CONTIG165 | 50645  | 51204  | 0.87 | 1.38E-01 | transcription_start_site | + | 53086  | 53086  | -2161 | 33479 | AN8930 |
| 706  | CONTIG165 | 50180  | 50604  | 2.04 | 7.63E-04 | transcription_start_site | + | 54942  | 54942  | -4550 | 33481 | AN8932 |
| 706  | CONTIG165 | 50180  | 50604  | 2.04 | 7.63E-04 | transcription_start_site | + | 55085  | 55085  | -4693 | 33482 | AN8932 |
| 2113 | CONTIG165 | 50645  | 51204  | 0.87 | 1.38E-01 | transcription_start_site | + | 54942  | 54942  | -4017 | 33481 | AN8932 |
| 2113 | CONTIG165 | 50645  | 51204  | 0.87 | 1.38E-01 | transcription_start_site | + | 55085  | 55085  | -4160 | 33482 | AN8932 |
| 1666 | CONTIG165 | 69991  | 70260  | 1.16 | 4.78E-02 | transcription_start_site | - | 66710  | 66710  | -3415 | 33493 | AN8936 |
| 1666 | CONTIG165 | 69991  | 70260  | 1.16 | 4.78E-02 | transcription_start_site | - | 66406  | 66406  | -3719 | 33494 | AN8936 |
| 1666 | CONTIG165 | 69991  | 70260  | 1.16 | 4.78E-02 | transcription_start_site | - | 65777  | 65777  | -4348 | 33495 | AN8936 |
| 1666 | CONTIG165 | 69991  | 70260  | 1.16 | 4.78E-02 | transcription_start_site | - | 65618  | 65618  | -4507 | 33496 | AN8936 |
| 1666 | CONTIG165 | 69991  | 70260  | 1.16 | 4.78E-02 | transcription_start_site | - | 65024  | 65024  | -5101 | 33497 | AN8936 |
| 2114 | CONTIG165 | 66835  | 67254  | 0.87 | 1.38E-01 | transcription_start_site | - | 66710  | 66710  | -334  | 33493 | AN8936 |
| 2114 | CONTIG165 | 66835  | 67254  | 0.87 | 1.38E-01 | transcription_start_site | - | 66406  | 66406  | -638  | 33494 | AN8936 |
| 2114 | CONTIG165 | 66835  | 67254  | 0.87 | 1.38E-01 | transcription_start_site | - | 65777  | 65777  | -1267 | 33495 | AN8936 |

|      |           |        |        |      |          |                          |   |        |        |       |       |        |
|------|-----------|--------|--------|------|----------|--------------------------|---|--------|--------|-------|-------|--------|
| 2114 | CONTIG165 | 66835  | 67254  | 0.87 | 1.38E-01 | transcription_start_site | - | 65618  | 65618  | -1426 | 33496 | AN8936 |
| 2114 | CONTIG165 | 66835  | 67254  | 0.87 | 1.38E-01 | transcription_start_site | - | 65024  | 65024  | -2020 | 33497 | AN8936 |
| 2114 | CONTIG165 | 66835  | 67254  | 0.87 | 1.38E-01 | transcription_start_site | + | 67143  | 67143  | -98   | 33498 | AN8937 |
| 2114 | CONTIG165 | 66835  | 67254  | 0.87 | 1.38E-01 | transcription_start_site | + | 67667  | 67667  | -622  | 33499 | AN8937 |
| 2114 | CONTIG165 | 66835  | 67254  | 0.87 | 1.38E-01 | transcription_start_site | + | 67749  | 67749  | -704  | 33500 | AN8937 |
| 1666 | CONTIG165 | 69991  | 70260  | 1.16 | 4.78E-02 | transcription_start_site | - | 70054  | 70054  | -71   | 33501 | AN8938 |
| 1666 | CONTIG165 | 69991  | 70260  | 1.16 | 4.78E-02 | transcription_start_site | - | 69893  | 69893  | -232  | 33502 | AN8938 |
| 1666 | CONTIG165 | 69991  | 70260  | 1.16 | 4.78E-02 | transcription_start_site | - | 68168  | 68168  | -1957 | 33503 | AN8938 |
| 2114 | CONTIG165 | 66835  | 67254  | 0.87 | 1.38E-01 | transcription_start_site | - | 68168  | 68168  | 1123  | 33503 | AN8938 |
| 566  | CONTIG165 | 86187  | 86466  | 2.23 | 2.51E-04 | transcription_start_site | - | 82624  | 82624  | -3702 | 33516 | AN8942 |
| 566  | CONTIG165 | 86187  | 86466  | 2.23 | 2.51E-04 | transcription_start_site | - | 81858  | 81858  | -4468 | 33517 | AN8942 |
| 566  | CONTIG165 | 86187  | 86466  | 2.23 | 2.51E-04 | transcription_start_site | + | 86719  | 86719  | -392  | 33518 | AN8943 |
| 566  | CONTIG165 | 86187  | 86466  | 2.23 | 2.51E-04 | transcription_start_site | + | 86951  | 86951  | -624  | 33519 | AN8943 |
| 566  | CONTIG165 | 86187  | 86466  | 2.23 | 2.51E-04 | transcription_start_site | + | 87136  | 87136  | -809  | 33520 | AN8943 |
| 566  | CONTIG165 | 86187  | 86466  | 2.23 | 2.51E-04 | transcription_start_site | + | 87602  | 87602  | -1275 | 33521 | AN8943 |
| 566  | CONTIG165 | 86187  | 86466  | 2.23 | 2.51E-04 | transcription_start_site | + | 87728  | 87728  | -1401 | 33522 | AN8943 |
| 566  | CONTIG165 | 86187  | 86466  | 2.23 | 2.51E-04 | transcription_start_site | + | 87728  | 87728  | 696   | 33522 | AN8943 |
| 1961 | CONTIG165 | 88282  | 88566  | 0.97 | 9.60E-02 | transcription_start_site | + | 87602  | 87602  | 822   | 33521 | AN8943 |
| 1961 | CONTIG165 | 88282  | 88566  | 0.97 | 9.60E-02 | transcription_start_site | + | 90026  | 90026  | -3699 | 33523 | AN8944 |
| 566  | CONTIG165 | 86187  | 86466  | 2.23 | 2.51E-04 | transcription_start_site | + | 90292  | 90292  | -3965 | 33524 | AN8944 |
| 566  | CONTIG165 | 86187  | 86466  | 2.23 | 2.51E-04 | transcription_start_site | + | 90528  | 90528  | -4201 | 33525 | AN8944 |
| 566  | CONTIG165 | 86187  | 86466  | 2.23 | 2.51E-04 | transcription_start_site | + | 90896  | 90896  | -4569 | 33526 | AN8944 |
| 566  | CONTIG165 | 86187  | 86466  | 2.23 | 2.51E-04 | transcription_start_site | + | 91053  | 91053  | -4726 | 33527 | AN8944 |
| 1961 | CONTIG165 | 88282  | 88566  | 0.97 | 9.60E-02 | transcription_start_site | + | 90026  | 90026  | -1602 | 33523 | AN8944 |
| 1961 | CONTIG165 | 88282  | 88566  | 0.97 | 9.60E-02 | transcription_start_site | + | 90292  | 90292  | -1868 | 33524 | AN8944 |
| 1961 | CONTIG165 | 88282  | 88566  | 0.97 | 9.60E-02 | transcription_start_site | + | 90528  | 90528  | -2104 | 33525 | AN8944 |
| 1961 | CONTIG165 | 88282  | 88566  | 0.97 | 9.60E-02 | transcription_start_site | + | 90896  | 90896  | -2472 | 33526 | AN8944 |
| 1961 | CONTIG165 | 88282  | 88566  | 0.97 | 9.60E-02 | transcription_start_site | + | 91053  | 91053  | -2629 | 33527 | AN8944 |
| 1961 | CONTIG165 | 88282  | 88566  | 0.97 | 9.60E-02 | transcription_start_site | + | 91531  | 91531  | -3107 | 33528 | AN8944 |
| 1962 | CONTIG165 | 92190  | 92619  | 0.97 | 9.60E-02 | transcription_start_site | + | 91531  | 91531  | 873   | 33528 | AN8944 |
| 288  | CONTIG165 | 94355  | 94719  | 2.65 | 0.00E+00 | transcription_start_site | - | 93871  | 93871  | -666  | 33529 | AN8945 |
| 288  | CONTIG165 | 94355  | 94719  | 2.65 | 0.00E+00 | transcription_start_site | - | 93759  | 93759  | -778  | 33530 | AN8945 |
| 288  | CONTIG165 | 94355  | 94719  | 2.65 | 0.00E+00 | transcription_start_site | - | 93659  | 93659  | -878  | 33531 | AN8945 |
| 288  | CONTIG165 | 94355  | 94719  | 2.65 | 0.00E+00 | transcription_start_site | - | 93506  | 93506  | -1031 | 33532 | AN8945 |
| 288  | CONTIG165 | 94355  | 94719  | 2.65 | 0.00E+00 | transcription_start_site | - | 93403  | 93403  | -1134 | 33533 | AN8945 |
| 288  | CONTIG165 | 94355  | 94719  | 2.65 | 0.00E+00 | transcription_start_site | - | 93307  | 93307  | -1230 | 33534 | AN8945 |
| 288  | CONTIG165 | 94355  | 94719  | 2.65 | 0.00E+00 | transcription_start_site | - | 93128  | 93128  | -1409 | 33535 | AN8945 |
| 288  | CONTIG165 | 94355  | 94719  | 2.65 | 0.00E+00 | transcription_start_site | - | 93050  | 93050  | -1487 | 33536 | AN8945 |
| 288  | CONTIG165 | 94355  | 94719  | 2.65 | 0.00E+00 | transcription_start_site | - | 92967  | 92967  | -1570 | 33537 | AN8945 |
| 1273 | CONTIG165 | 95936  | 97195  | 1.46 | 7.02E-03 | transcription_start_site | - | 93871  | 93871  | -2694 | 33529 | AN8945 |
| 1273 | CONTIG165 | 95936  | 97195  | 1.46 | 7.02E-03 | transcription_start_site | - | 93759  | 93759  | -2806 | 33530 | AN8945 |
| 1273 | CONTIG165 | 95936  | 97195  | 1.46 | 7.02E-03 | transcription_start_site | - | 93659  | 93659  | -2906 | 33531 | AN8945 |
| 1273 | CONTIG165 | 95936  | 97195  | 1.46 | 7.02E-03 | transcription_start_site | - | 93506  | 93506  | -3059 | 33532 | AN8945 |
| 1273 | CONTIG165 | 95936  | 97195  | 1.46 | 7.02E-03 | transcription_start_site | - | 93403  | 93403  | -3162 | 33533 | AN8945 |
| 1273 | CONTIG165 | 95936  | 97195  | 1.46 | 7.02E-03 | transcription_start_site | - | 93307  | 93307  | -3258 | 33534 | AN8945 |
| 1273 | CONTIG165 | 95936  | 97195  | 1.46 | 7.02E-03 | transcription_start_site | - | 93128  | 93128  | -3437 | 33535 | AN8945 |
| 1273 | CONTIG165 | 95936  | 97195  | 1.46 | 7.02E-03 | transcription_start_site | - | 93050  | 93050  | -3515 | 33536 | AN8945 |
| 1273 | CONTIG165 | 95936  | 97195  | 1.46 | 7.02E-03 | transcription_start_site | - | 92967  | 92967  | -3598 | 33537 | AN8945 |
| 1962 | CONTIG165 | 92190  | 92619  | 0.97 | 9.60E-02 | transcription_start_site | - | 92967  | 92967  | 562   | 33537 | AN8945 |
| 1962 | CONTIG165 | 92190  | 92619  | 0.97 | 9.60E-02 | transcription_start_site | - | 93050  | 93050  | 645   | 33536 | AN8945 |
| 1962 | CONTIG165 | 92190  | 92619  | 0.97 | 9.60E-02 | transcription_start_site | - | 93128  | 93128  | 723   | 33535 | AN8945 |
| 1962 | CONTIG165 | 92190  | 92619  | 0.97 | 9.60E-02 | transcription_start_site | - | 93307  | 93307  | 902   | 33534 | AN8945 |
| 1962 | CONTIG165 | 92190  | 92619  | 0.97 | 9.60E-02 | transcription_start_site | - | 93403  | 93403  | 998   | 33533 | AN8945 |
| 1962 | CONTIG165 | 92190  | 92619  | 0.97 | 9.60E-02 | transcription_start_site | - | 93506  | 93506  | 1101  | 33532 | AN8945 |
| 2144 | CONTIG165 | 100201 | 100866 | 0.84 | 1.54E-01 | transcription_start_site | + | 102917 | 102917 | -2383 | 33538 | AN8947 |
| 2144 | CONTIG165 | 100201 | 100866 | 0.84 | 1.54E-01 | transcription_start_site | + | 103455 | 103455 | -2921 | 33539 | AN8947 |
| 2144 | CONTIG165 | 100201 | 100866 | 0.84 | 1.54E-01 | transcription_start_site | + | 103837 | 103837 | -3303 | 33540 | AN8947 |

|      |           |        |        |      |          |                          |   |        |        |       |       |        |
|------|-----------|--------|--------|------|----------|--------------------------|---|--------|--------|-------|-------|--------|
| 2144 | CONTIG165 | 100201 | 100866 | 0.84 | 1.54E-01 | transcription_start_site | + | 104689 | 104689 | -4155 | 33541 | AN8947 |
| 2144 | CONTIG165 | 100201 | 100866 | 0.84 | 1.54E-01 | transcription_start_site | + | 104821 | 104821 | -4287 | 33542 | AN8947 |
| 346  | CONTIG166 | 7216   | 7627   | 2.54 | 2.06E-04 | transcription_start_site | + | 7647   | 7647   | -225  | 33563 | AN8953 |
| 346  | CONTIG166 | 7216   | 7627   | 2.54 | 2.06E-04 | transcription_start_site | + | 9649   | 9649   | -2227 | 33564 | AN8953 |
| 346  | CONTIG166 | 7216   | 7627   | 2.54 | 2.06E-04 | transcription_start_site | + | 9842   | 9842   | -2420 | 33565 | AN8953 |
| 346  | CONTIG166 | 7216   | 7627   | 2.54 | 2.06E-04 | transcription_start_site | + | 10034  | 10034  | -2612 | 33566 | AN8953 |
| 346  | CONTIG166 | 7216   | 7627   | 2.54 | 2.06E-04 | transcription_start_site | + | 11740  | 11740  | -4318 | 33567 | AN8954 |
| 346  | CONTIG166 | 7216   | 7627   | 2.54 | 2.06E-04 | transcription_start_site | + | 12331  | 12331  | -4909 | 33568 | AN8954 |
| 346  | CONTIG166 | 7216   | 7627   | 2.54 | 2.06E-04 | transcription_start_site | + | 12435  | 12435  | -5013 | 33569 | AN8954 |
| 389  | CONTIG166 | 21984  | 22333  | 2.46 | 7.06E-04 | transcription_start_site | - | 21774  | 21774  | -384  | 33577 | AN8956 |
| 2059 | CONTIG166 | 24460  | 24819  | 0.91 | 1.97E-01 | transcription_start_site | - | 21774  | 21774  | -2865 | 33577 | AN8956 |
| 2192 | CONTIG166 | 20329  | 21208  | 0.8  | 1.64E-01 | transcription_start_site | - | 21774  | 21774  | 1005  | 33577 | AN8956 |
| 389  | CONTIG166 | 21984  | 22333  | 2.46 | 7.06E-04 | transcription_start_site | + | 24698  | 24698  | -2539 | 33578 | AN8957 |
| 389  | CONTIG166 | 21984  | 22333  | 2.46 | 7.06E-04 | transcription_start_site | + | 24991  | 24991  | -2832 | 33579 | AN8957 |
| 389  | CONTIG166 | 21984  | 22333  | 2.46 | 7.06E-04 | transcription_start_site | + | 25339  | 25339  | -3180 | 33580 | AN8957 |
| 2059 | CONTIG166 | 24460  | 24819  | 0.91 | 1.97E-01 | transcription_start_site | + | 24698  | 24698  | -58   | 33578 | AN8957 |
| 2059 | CONTIG166 | 24460  | 24819  | 0.91 | 1.97E-01 | transcription_start_site | + | 24991  | 24991  | -351  | 33579 | AN8957 |
| 2059 | CONTIG166 | 24460  | 24819  | 0.91 | 1.97E-01 | transcription_start_site | + | 25339  | 25339  | -699  | 33580 | AN8957 |
| 2059 | CONTIG166 | 24460  | 24819  | 0.91 | 1.97E-01 | transcription_start_site | + | 27913  | 27913  | -3273 | 33581 | AN8957 |
| 2192 | CONTIG166 | 20329  | 21208  | 0.8  | 1.64E-01 | transcription_start_site | + | 24698  | 24698  | -3929 | 33578 | AN8957 |
| 2192 | CONTIG166 | 20329  | 21208  | 0.8  | 1.64E-01 | transcription_start_site | + | 24991  | 24991  | -4222 | 33579 | AN8957 |
| 2192 | CONTIG166 | 20329  | 21208  | 0.8  | 1.64E-01 | transcription_start_site | + | 25339  | 25339  | -4570 | 33580 | AN8957 |
| 632  | CONTIG167 | 1821   | 2099   | 2.14 | 1.54E-02 | transcription_start_site | + | 4739   | 4739   | -2779 | 33594 | AN8964 |
| 632  | CONTIG167 | 1821   | 2099   | 2.14 | 1.54E-02 | transcription_start_site | + | 5027   | 5027   | -3067 | 33595 | AN8964 |
| 632  | CONTIG167 | 1821   | 2099   | 2.14 | 1.54E-02 | transcription_start_site | + | 5240   | 5240   | -3280 | 33596 | AN8964 |
| 632  | CONTIG167 | 1821   | 2099   | 2.14 | 1.54E-02 | transcription_start_site | + | 5409   | 5409   | -3449 | 33597 | AN8964 |
| 632  | CONTIG167 | 1821   | 2099   | 2.14 | 1.54E-02 | transcription_start_site | + | 5911   | 5911   | -3951 | 33598 | AN8964 |
| 632  | CONTIG167 | 1821   | 2099   | 2.14 | 1.54E-02 | transcription_start_site | + | 6728   | 6728   | -4768 | 33599 | AN8964 |
| 382  | CONTIG167 | 12012  | 12351  | 2.48 | 7.08E-03 | transcription_start_site | + | 12444  | 12444  | -262  | 33600 | AN8966 |
| 382  | CONTIG167 | 12012  | 12351  | 2.48 | 7.08E-03 | transcription_start_site | + | 14084  | 14084  | -1902 | 33601 | AN8966 |
| 382  | CONTIG167 | 12012  | 12351  | 2.48 | 7.08E-03 | transcription_start_site | + | 14525  | 14525  | -2343 | 33602 | AN8966 |
| 1546 | CONTIG167 | 9012   | 9651   | 1.24 | 1.54E-01 | transcription_start_site | + | 12444  | 12444  | -3112 | 33600 | AN8966 |
| 1546 | CONTIG167 | 9012   | 9651   | 1.24 | 1.54E-01 | transcription_start_site | + | 14084  | 14084  | -4752 | 33601 | AN8966 |
| 1546 | CONTIG167 | 9012   | 9651   | 1.24 | 1.54E-01 | transcription_start_site | + | 14525  | 14525  | -5193 | 33602 | AN8966 |
| 382  | CONTIG167 | 12012  | 12351  | 2.48 | 7.08E-03 | transcription_start_site | + | 17209  | 17209  | -5027 | 33603 | AN8967 |
| 168  | CONTIG167 | 25051  | 25350  | 2.91 | 1.62E-03 | transcription_start_site | - | 20798  | 20798  | -4402 | 33607 | AN8969 |
| 168  | CONTIG167 | 25051  | 25350  | 2.91 | 1.62E-03 | transcription_start_site | - | 20608  | 20608  | -4592 | 33608 | AN8969 |
| 168  | CONTIG167 | 25051  | 25350  | 2.91 | 1.62E-03 | transcription_start_site | - | 22822  | 22822  | -2378 | 33609 | AN8970 |
| 168  | CONTIG167 | 25051  | 25350  | 2.91 | 1.62E-03 | transcription_start_site | - | 22720  | 22720  | -2480 | 33610 | AN8970 |
| 168  | CONTIG167 | 25051  | 25350  | 2.91 | 1.62E-03 | transcription_start_site | - | 24746  | 24746  | -454  | 33611 | AN8971 |
| 168  | CONTIG167 | 25051  | 25350  | 2.91 | 1.62E-03 | transcription_start_site | - | 24128  | 24128  | -1072 | 33612 | AN8971 |
| 168  | CONTIG167 | 25051  | 25350  | 2.91 | 1.62E-03 | transcription_start_site | - | 23942  | 23942  | -1258 | 33613 | AN8971 |
| 168  | CONTIG167 | 25051  | 25350  | 2.91 | 1.62E-03 | transcription_start_site | - | 23253  | 23253  | -1947 | 33614 | AN8971 |
| 794  | CONTIG167 | 28671  | 29150  | 1.95 | 2.63E-02 | transcription_start_site | - | 24746  | 24746  | -4164 | 33611 | AN8971 |
| 794  | CONTIG167 | 28671  | 29150  | 1.95 | 2.63E-02 | transcription_start_site | - | 24128  | 24128  | -4782 | 33612 | AN8971 |
| 794  | CONTIG167 | 28671  | 29150  | 1.95 | 2.63E-02 | transcription_start_site | - | 23942  | 23942  | -4968 | 33613 | AN8971 |
| 825  | CONTIG167 | 32271  | 32675  | 1.91 | 3.01E-02 | transcription_start_site | - | 32242  | 32242  | -231  | 33616 | AN8972 |
| 825  | CONTIG167 | 32271  | 32675  | 1.91 | 3.01E-02 | transcription_start_site | - | 33027  | 33027  | 554   | 33615 | AN8972 |
| 825  | CONTIG167 | 32271  | 32675  | 1.91 | 3.01E-02 | transcription_start_site | - | 31789  | 31789  | -684  | 33617 | AN8972 |
| 825  | CONTIG167 | 32271  | 32675  | 1.91 | 3.01E-02 | transcription_start_site | - | 31256  | 31256  | -1217 | 33618 | AN8972 |
| 825  | CONTIG167 | 32271  | 32675  | 1.91 | 3.01E-02 | transcription_start_site | - | 30846  | 30846  | -1627 | 33619 | AN8972 |
| 825  | CONTIG167 | 32271  | 32675  | 1.91 | 3.01E-02 | transcription_start_site | - | 30648  | 30648  | -1825 | 33620 | AN8972 |
| 825  | CONTIG167 | 32271  | 32675  | 1.91 | 3.01E-02 | transcription_start_site | - | 30277  | 30277  | -2196 | 33621 | AN8972 |
| 1160 | CONTIG167 | 37971  | 38399  | 1.57 | 6.74E-02 | transcription_start_site | - | 33027  | 33027  | -5158 | 33615 | AN8972 |
| 825  | CONTIG167 | 32271  | 32675  | 1.91 | 3.01E-02 | transcription_start_site | + | 34484  | 34484  | -2011 | 33622 | AN8973 |
| 825  | CONTIG167 | 32271  | 32675  | 1.91 | 3.01E-02 | transcription_start_site | + | 34768  | 34768  | -2295 | 33623 | AN8973 |
| 825  | CONTIG167 | 32271  | 32675  | 1.91 | 3.01E-02 | transcription_start_site | + | 37082  | 37082  | -4609 | 33624 | AN8974 |

|      |           |        |        |      |          |                          |   |        |        |       |       |        |
|------|-----------|--------|--------|------|----------|--------------------------|---|--------|--------|-------|-------|--------|
| 825  | CONTIG167 | 32271  | 32675  | 1.91 | 3.01E-02 | transcription_start_site | + | 37231  | 37231  | -4758 | 33625 | AN8974 |
| 1160 | CONTIG167 | 37971  | 38399  | 1.57 | 6.74E-02 | transcription_start_site | + | 38039  | 38039  | 146   | 33627 | AN8974 |
| 1160 | CONTIG167 | 37971  | 38399  | 1.57 | 6.74E-02 | transcription_start_site | + | 37860  | 37860  | 325   | 33626 | AN8974 |
| 1160 | CONTIG167 | 37971  | 38399  | 1.57 | 6.74E-02 | transcription_start_site | + | 37231  | 37231  | 954   | 33625 | AN8974 |
| 1160 | CONTIG167 | 37971  | 38399  | 1.57 | 6.74E-02 | transcription_start_site | + | 37082  | 37082  | 1103  | 33624 | AN8974 |
| 1483 | CONTIG167 | 40596  | 41017  | 1.29 | 1.38E-01 | transcription_start_site | - | 40722  | 40722  | -84   | 33628 | AN8975 |
| 753  | CONTIG168 | 6451   | 6875   | 1.99 | 1.35E-03 | transcription_start_site | - | 2641   | 2641   | -4022 | 33634 | AN8977 |
| 753  | CONTIG168 | 6451   | 6875   | 1.99 | 1.35E-03 | transcription_start_site | - | 1833   | 1833   | -4830 | 33635 | AN8977 |
| 753  | CONTIG168 | 6451   | 6875   | 1.99 | 1.35E-03 | transcription_start_site | - | 6565   | 6565   | -98   | 33636 | AN8978 |
| 753  | CONTIG168 | 6451   | 6875   | 1.99 | 1.35E-03 | transcription_start_site | - | 6285   | 6285   | -378  | 33637 | AN8978 |
| 1278 | CONTIG168 | 25818  | 26232  | 1.46 | 1.80E-02 | transcription_start_site | - | 23804  | 23804  | -2221 | 33667 | AN8985 |
| 1278 | CONTIG168 | 25818  | 26232  | 1.46 | 1.80E-02 | transcription_start_site | - | 22679  | 22679  | -3346 | 33668 | AN8985 |
| 1278 | CONTIG168 | 25818  | 26232  | 1.46 | 1.80E-02 | transcription_start_site | - | 22574  | 22574  | -3451 | 33669 | AN8985 |
| 1278 | CONTIG168 | 25818  | 26232  | 1.46 | 1.80E-02 | transcription_start_site | - | 25617  | 25617  | -408  | 33670 | AN8986 |
| 1278 | CONTIG168 | 25818  | 26232  | 1.46 | 1.80E-02 | transcription_start_site | - | 25148  | 25148  | -877  | 33671 | AN8986 |
| 1278 | CONTIG168 | 25818  | 26232  | 1.46 | 1.80E-02 | transcription_start_site | + | 28841  | 28841  | -2816 | 33672 | AN8987 |
| 1278 | CONTIG168 | 25818  | 26232  | 1.46 | 1.80E-02 | transcription_start_site | + | 29771  | 29771  | -3746 | 33673 | AN8987 |
| 1278 | CONTIG168 | 25818  | 26232  | 1.46 | 1.80E-02 | transcription_start_site | + | 30305  | 30305  | -4280 | 33674 | AN8987 |
| 1278 | CONTIG168 | 25818  | 26232  | 1.46 | 1.80E-02 | transcription_start_site | + | 30468  | 30468  | -4443 | 33675 | AN8987 |
| 1278 | CONTIG168 | 25818  | 26232  | 1.46 | 1.80E-02 | transcription_start_site | + | 30787  | 30787  | -4762 | 33676 | AN8988 |
| 1278 | CONTIG168 | 25818  | 26232  | 1.46 | 1.80E-02 | transcription_start_site | + | 31063  | 31063  | -5038 | 33677 | AN8988 |
| 197  | CONTIG168 | 33693  | 33967  | 2.82 | 0.00E+00 | transcription_start_site | + | 32975  | 32975  | 855   | 33681 | AN8989 |
| 197  | CONTIG168 | 33693  | 33967  | 2.82 | 0.00E+00 | transcription_start_site | + | 32729  | 32729  | 1101  | 33680 | AN8989 |
| 197  | CONTIG168 | 33693  | 33967  | 2.82 | 0.00E+00 | transcription_start_site | + | 34257  | 34257  | -427  | 33682 | AN8990 |
| 197  | CONTIG168 | 33693  | 33967  | 2.82 | 0.00E+00 | transcription_start_site | + | 34938  | 34938  | -1108 | 33683 | AN8990 |
| 197  | CONTIG168 | 33693  | 33967  | 2.82 | 0.00E+00 | transcription_start_site | + | 35200  | 35200  | -1370 | 33684 | AN8990 |
| 197  | CONTIG168 | 33693  | 33967  | 2.82 | 0.00E+00 | transcription_start_site | + | 35829  | 35829  | -1999 | 33685 | AN8990 |
| 1710 | CONTIG168 | 65179  | 65468  | 1.13 | 6.04E-02 | transcription_start_site | - | 64935  | 64935  | -388  | 33723 | AN9000 |
| 1710 | CONTIG168 | 65179  | 65468  | 1.13 | 6.04E-02 | transcription_start_site | - | 64616  | 64616  | -707  | 33724 | AN9000 |
| 1710 | CONTIG168 | 65179  | 65468  | 1.13 | 6.04E-02 | transcription_start_site | - | 64290  | 64290  | -1033 | 33725 | AN9000 |
| 1710 | CONTIG168 | 65179  | 65468  | 1.13 | 6.04E-02 | transcription_start_site | - | 64010  | 64010  | -1313 | 33726 | AN9000 |
| 2086 | CONTIG168 | 70802  | 71241  | 0.89 | 1.38E-01 | transcription_start_site | - | 67014  | 67014  | -4007 | 33727 | AN9001 |
| 2086 | CONTIG168 | 70802  | 71241  | 0.89 | 1.38E-01 | transcription_start_site | - | 66746  | 66746  | -4275 | 33728 | AN9001 |
| 2086 | CONTIG168 | 70802  | 71241  | 0.89 | 1.38E-01 | transcription_start_site | - | 66583  | 66583  | -4438 | 33729 | AN9001 |
| 2086 | CONTIG168 | 70802  | 71241  | 0.89 | 1.38E-01 | transcription_start_site | + | 71183  | 71183  | -161  | 33730 | AN9002 |
| 2086 | CONTIG168 | 70802  | 71241  | 0.89 | 1.38E-01 | transcription_start_site | + | 71311  | 71311  | -289  | 33731 | AN9002 |
| 2086 | CONTIG168 | 70802  | 71241  | 0.89 | 1.38E-01 | transcription_start_site | + | 71495  | 71495  | -473  | 33732 | AN9002 |
| 2086 | CONTIG168 | 70802  | 71241  | 0.89 | 1.38E-01 | transcription_start_site | + | 72075  | 72075  | -1053 | 33733 | AN9002 |
| 2086 | CONTIG168 | 70802  | 71241  | 0.89 | 1.38E-01 | transcription_start_site | + | 72320  | 72320  | -1298 | 33734 | AN9002 |
| 754  | CONTIG168 | 95045  | 95609  | 1.99 | 1.35E-03 | transcription_start_site | - | 93185  | 93185  | -2142 | 33759 | AN9007 |
| 754  | CONTIG168 | 95045  | 95609  | 1.99 | 1.35E-03 | transcription_start_site | - | 93028  | 93028  | -2299 | 33760 | AN9007 |
| 754  | CONTIG168 | 95045  | 95609  | 1.99 | 1.35E-03 | transcription_start_site | - | 92371  | 92371  | -2956 | 33761 | AN9007 |
| 754  | CONTIG168 | 95045  | 95609  | 1.99 | 1.35E-03 | transcription_start_site | + | 95776  | 95776  | -449  | 33762 | AN9008 |
| 754  | CONTIG168 | 95045  | 95609  | 1.99 | 1.35E-03 | transcription_start_site | + | 99381  | 99381  | -4054 | 33763 | AN9008 |
| 2127 | CONTIG168 | 100595 | 101019 | 0.86 | 1.54E-01 | transcription_start_site | - | 100596 | 100596 | -211  | 33764 | AN9009 |
| 2127 | CONTIG168 | 100595 | 101019 | 0.86 | 1.54E-01 | transcription_start_site | - | 100399 | 100399 | -408  | 33765 | AN9009 |
| 2127 | CONTIG168 | 100595 | 101019 | 0.86 | 1.54E-01 | transcription_start_site | + | 101261 | 101261 | -454  | 33766 | AN9010 |
| 2127 | CONTIG168 | 100595 | 101019 | 0.86 | 1.54E-01 | transcription_start_site | + | 101586 | 101586 | -779  | 33767 | AN9010 |
| 2127 | CONTIG168 | 100595 | 101019 | 0.86 | 1.54E-01 | transcription_start_site | + | 101755 | 101755 | -948  | 33768 | AN9010 |
| 2127 | CONTIG168 | 100595 | 101019 | 0.86 | 1.54E-01 | transcription_start_site | + | 101901 | 101901 | -1094 | 33769 | AN9010 |
| 2127 | CONTIG168 | 100595 | 101019 | 0.86 | 1.54E-01 | transcription_start_site | + | 102116 | 102116 | -1309 | 33770 | AN9010 |
| 2127 | CONTIG168 | 100595 | 101019 | 0.86 | 1.54E-01 | transcription_start_site | + | 102470 | 102470 | -1663 | 33771 | AN9010 |
| 2127 | CONTIG168 | 100595 | 101019 | 0.86 | 1.54E-01 | transcription_start_site | + | 102826 | 102826 | -2019 | 33772 | AN9010 |
| 2127 | CONTIG168 | 100595 | 101019 | 0.86 | 1.54E-01 | transcription_start_site | + | 102989 | 102989 | -2182 | 33773 | AN9010 |
| 138  | CONTIG168 | 121218 | 121575 | 2.98 | 0.00E+00 | transcription_start_site | + | 120251 | 120251 | 1145  | 33798 | AN9017 |
| 138  | CONTIG168 | 121218 | 121575 | 2.98 | 0.00E+00 | transcription_start_site | - | 121231 | 121231 | -165  | 33799 | AN9018 |
| 138  | CONTIG168 | 121218 | 121575 | 2.98 | 0.00E+00 | transcription_start_site | - | 120630 | 120630 | -766  | 33800 | AN9018 |

|      |           |        |        |      |          |                          |   |        |        |       |       |        |
|------|-----------|--------|--------|------|----------|--------------------------|---|--------|--------|-------|-------|--------|
| 1274 | CONTIG168 | 125033 | 125533 | 1.46 | 7.36E-03 | transcription_start_site | - | 121231 | 121231 | -4052 | 33799 | AN9018 |
| 1274 | CONTIG168 | 125033 | 125533 | 1.46 | 7.36E-03 | transcription_start_site | - | 120630 | 120630 | -4653 | 33800 | AN9018 |
| 138  | CONTIG168 | 121218 | 121575 | 2.98 | 0.00E+00 | transcription_start_site | - | 121952 | 121952 | 555   | 33803 | AN9019 |
| 138  | CONTIG168 | 121218 | 121575 | 2.98 | 0.00E+00 | transcription_start_site | - | 122124 | 122124 | 727   | 33802 | AN9019 |
| 1274 | CONTIG168 | 125033 | 125533 | 1.46 | 7.36E-03 | transcription_start_site | - | 122943 | 122943 | -2340 | 33801 | AN9019 |
| 1274 | CONTIG168 | 125033 | 125533 | 1.46 | 7.36E-03 | transcription_start_site | - | 122124 | 122124 | -3159 | 33802 | AN9019 |
| 1274 | CONTIG168 | 125033 | 125533 | 1.46 | 7.36E-03 | transcription_start_site | - | 121952 | 121952 | -3331 | 33803 | AN9019 |
| 1274 | CONTIG168 | 125033 | 125533 | 1.46 | 7.36E-03 | transcription_start_site | - | 124968 | 124968 | -315  | 33804 | AN9020 |
| 1274 | CONTIG168 | 125033 | 125533 | 1.46 | 7.36E-03 | transcription_start_site | + | 129815 | 129815 | -4532 | 33808 | AN9022 |
| 1274 | CONTIG168 | 125033 | 125533 | 1.46 | 7.36E-03 | transcription_start_site | + | 129908 | 129908 | -4625 | 33809 | AN9022 |
| 1274 | CONTIG168 | 125033 | 125533 | 1.46 | 7.36E-03 | transcription_start_site | + | 130145 | 130145 | -4862 | 33810 | AN9022 |
| 689  | CONTIG168 | 133959 | 134303 | 2.06 | 1.45E-03 | transcription_start_site | - | 132670 | 132670 | -1461 | 33811 | AN9023 |
| 689  | CONTIG168 | 133959 | 134303 | 2.06 | 1.45E-03 | transcription_start_site | - | 132040 | 132040 | -2091 | 33812 | AN9023 |
| 689  | CONTIG168 | 133959 | 134303 | 2.06 | 1.45E-03 | transcription_start_site | - | 131693 | 131693 | -2438 | 33813 | AN9023 |
| 689  | CONTIG168 | 133959 | 134303 | 2.06 | 1.45E-03 | transcription_start_site | - | 131231 | 131231 | -2900 | 33814 | AN9023 |
| 689  | CONTIG168 | 133959 | 134303 | 2.06 | 1.45E-03 | transcription_start_site | - | 131136 | 131136 | -2995 | 33815 | AN9023 |
| 689  | CONTIG168 | 133959 | 134303 | 2.06 | 1.45E-03 | transcription_start_site | - | 130885 | 130885 | -3246 | 33816 | AN9023 |
| 689  | CONTIG168 | 133959 | 134303 | 2.06 | 1.45E-03 | transcription_start_site | + | 133635 | 133635 | 496   | 33819 | AN9024 |
| 689  | CONTIG168 | 133959 | 134303 | 2.06 | 1.45E-03 | transcription_start_site | + | 133148 | 133148 | 983   | 33818 | AN9024 |
| 689  | CONTIG168 | 133959 | 134303 | 2.06 | 1.45E-03 | transcription_start_site | + | 138272 | 138272 | -4141 | 33820 | AN9025 |
| 689  | CONTIG168 | 133959 | 134303 | 2.06 | 1.45E-03 | transcription_start_site | + | 138679 | 138679 | -4548 | 33821 | AN9025 |
| 2081 | CONTIG168 | 138019 | 138578 | 0.89 | 4.39E-02 | transcription_start_site | + | 138272 | 138272 | 26    | 33820 | AN9025 |
| 2081 | CONTIG168 | 138019 | 138578 | 0.89 | 4.39E-02 | transcription_start_site | + | 138679 | 138679 | -380  | 33821 | AN9025 |
| 1867 | CONTIG168 | 166070 | 166553 | 1.03 | 8.63E-02 | transcription_start_site | - | 163308 | 163308 | -3003 | 33849 | AN9034 |
| 1867 | CONTIG168 | 166070 | 166553 | 1.03 | 8.63E-02 | transcription_start_site | - | 163133 | 163133 | -3178 | 33850 | AN9034 |
| 1867 | CONTIG168 | 166070 | 166553 | 1.03 | 8.63E-02 | transcription_start_site | - | 162877 | 162877 | -3434 | 33851 | AN9034 |
| 1867 | CONTIG168 | 166070 | 166553 | 1.03 | 8.63E-02 | transcription_start_site | + | 166528 | 166528 | -216  | 33853 | AN9035 |
| 1867 | CONTIG168 | 166070 | 166553 | 1.03 | 8.63E-02 | transcription_start_site | + | 165797 | 165797 | 514   | 33852 | AN9035 |
| 1867 | CONTIG168 | 166070 | 166553 | 1.03 | 8.63E-02 | transcription_start_site | + | 168932 | 168932 | -2620 | 33854 | AN9036 |
| 1867 | CONTIG168 | 166070 | 166553 | 1.03 | 8.63E-02 | transcription_start_site | + | 169166 | 169166 | -2854 | 33855 | AN9036 |
| 1867 | CONTIG168 | 166070 | 166553 | 1.03 | 8.63E-02 | transcription_start_site | + | 169255 | 169255 | -2943 | 33856 | AN9036 |
| 1867 | CONTIG168 | 166070 | 166553 | 1.03 | 8.63E-02 | transcription_start_site | + | 169809 | 169809 | -3497 | 33857 | AN9036 |
| 1867 | CONTIG168 | 166070 | 166553 | 1.03 | 8.63E-02 | transcription_start_site | + | 169938 | 169938 | -3626 | 33858 | AN9036 |
| 1972 | CONTIG168 | 194562 | 194841 | 0.96 | 1.08E-01 | transcription_start_site | - | 191826 | 191826 | -2875 | 33878 | AN9045 |
| 1972 | CONTIG168 | 194562 | 194841 | 0.96 | 1.08E-01 | transcription_start_site | - | 191176 | 191176 | -3525 | 33879 | AN9045 |
| 1972 | CONTIG168 | 194562 | 194841 | 0.96 | 1.08E-01 | transcription_start_site | - | 190489 | 190489 | -4212 | 33880 | AN9045 |
| 139  | CONTIG168 | 197780 | 198294 | 2.98 | 0.00E+00 | transcription_start_site | - | 194282 | 194282 | -3755 | 33881 | AN9046 |
| 139  | CONTIG168 | 197780 | 198294 | 2.98 | 0.00E+00 | transcription_start_site | - | 193788 | 193788 | -4249 | 33882 | AN9046 |
| 139  | CONTIG168 | 197780 | 198294 | 2.98 | 0.00E+00 | transcription_start_site | - | 193655 | 193655 | -4382 | 33883 | AN9046 |
| 139  | CONTIG168 | 197780 | 198294 | 2.98 | 0.00E+00 | transcription_start_site | - | 193484 | 193484 | -4553 | 33884 | AN9046 |
| 139  | CONTIG168 | 197780 | 198294 | 2.98 | 0.00E+00 | transcription_start_site | - | 193297 | 193297 | -4740 | 33885 | AN9046 |
| 139  | CONTIG168 | 197780 | 198294 | 2.98 | 0.00E+00 | transcription_start_site | - | 192919 | 192919 | -5118 | 33886 | AN9046 |
| 139  | CONTIG168 | 197780 | 198294 | 2.98 | 0.00E+00 | transcription_start_site | - | 192812 | 192812 | -5225 | 33887 | AN9046 |
| 1972 | CONTIG168 | 194562 | 194841 | 0.96 | 1.08E-01 | transcription_start_site | - | 194282 | 194282 | -419  | 33881 | AN9046 |
| 1972 | CONTIG168 | 194562 | 194841 | 0.96 | 1.08E-01 | transcription_start_site | - | 193788 | 193788 | -913  | 33882 | AN9046 |
| 1972 | CONTIG168 | 194562 | 194841 | 0.96 | 1.08E-01 | transcription_start_site | - | 193655 | 193655 | -1046 | 33883 | AN9046 |
| 1972 | CONTIG168 | 194562 | 194841 | 0.96 | 1.08E-01 | transcription_start_site | - | 193484 | 193484 | -1217 | 33884 | AN9046 |
| 1972 | CONTIG168 | 194562 | 194841 | 0.96 | 1.08E-01 | transcription_start_site | - | 193297 | 193297 | -1404 | 33885 | AN9046 |
| 1972 | CONTIG168 | 194562 | 194841 | 0.96 | 1.08E-01 | transcription_start_site | - | 192919 | 192919 | -1782 | 33886 | AN9046 |
| 1972 | CONTIG168 | 194562 | 194841 | 0.96 | 1.08E-01 | transcription_start_site | - | 192812 | 192812 | -1889 | 33887 | AN9046 |
| 1972 | CONTIG168 | 194562 | 194841 | 0.96 | 1.08E-01 | transcription_start_site | - | 192603 | 192603 | -2098 | 33888 | AN9046 |
| 139  | CONTIG168 | 197780 | 198294 | 2.98 | 0.00E+00 | transcription_start_site | + | 197156 | 197156 | 881   | 33892 | AN9047 |
| 139  | CONTIG168 | 197780 | 198294 | 2.98 | 0.00E+00 | transcription_start_site | + | 196792 | 196792 | 1245  | 33891 | AN9047 |
| 1972 | CONTIG168 | 194562 | 194841 | 0.96 | 1.08E-01 | transcription_start_site | + | 195973 | 195973 | -1271 | 33889 | AN9047 |
| 1972 | CONTIG168 | 194562 | 194841 | 0.96 | 1.08E-01 | transcription_start_site | + | 196133 | 196133 | -1431 | 33890 | AN9047 |
| 1972 | CONTIG168 | 194562 | 194841 | 0.96 | 1.08E-01 | transcription_start_site | + | 196792 | 196792 | -2090 | 33891 | AN9047 |
| 1972 | CONTIG168 | 194562 | 194841 | 0.96 | 1.08E-01 | transcription_start_site | + | 197156 | 197156 | -2454 | 33892 | AN9047 |

|      |           |        |        |      |          |                          |   |        |        |       |       |        |
|------|-----------|--------|--------|------|----------|--------------------------|---|--------|--------|-------|-------|--------|
| 139  | CONTIG168 | 197780 | 198294 | 2.98 | 0.00E+00 | transcription_start_site | + | 198068 | 198068 | -31   | 33893 | AN9048 |
| 139  | CONTIG168 | 197780 | 198294 | 2.98 | 0.00E+00 | transcription_start_site | + | 198306 | 198306 | -269  | 33894 | AN9048 |
| 139  | CONTIG168 | 197780 | 198294 | 2.98 | 0.00E+00 | transcription_start_site | + | 198498 | 198498 | -461  | 33895 | AN9048 |
| 139  | CONTIG168 | 197780 | 198294 | 2.98 | 0.00E+00 | transcription_start_site | + | 199671 | 199671 | -1634 | 33896 | AN9048 |
| 139  | CONTIG168 | 197780 | 198294 | 2.98 | 0.00E+00 | transcription_start_site | + | 200354 | 200354 | -2317 | 33897 | AN9048 |
| 139  | CONTIG168 | 197780 | 198294 | 2.98 | 0.00E+00 | transcription_start_site | + | 200665 | 200665 | -2628 | 33898 | AN9048 |
| 139  | CONTIG168 | 197780 | 198294 | 2.98 | 0.00E+00 | transcription_start_site | + | 201420 | 201420 | -3383 | 33899 | AN9048 |
| 139  | CONTIG168 | 197780 | 198294 | 2.98 | 0.00E+00 | transcription_start_site | + | 201670 | 201670 | -3633 | 33900 | AN9048 |
| 139  | CONTIG168 | 197780 | 198294 | 2.98 | 0.00E+00 | transcription_start_site | + | 201838 | 201838 | -3801 | 33901 | AN9048 |
| 1972 | CONTIG168 | 194562 | 194841 | 0.96 | 1.08E-01 | transcription_start_site | + | 198068 | 198068 | -3366 | 33893 | AN9048 |
| 1972 | CONTIG168 | 194562 | 194841 | 0.96 | 1.08E-01 | transcription_start_site | + | 198306 | 198306 | -3604 | 33894 | AN9048 |
| 1972 | CONTIG168 | 194562 | 194841 | 0.96 | 1.08E-01 | transcription_start_site | + | 198498 | 198498 | -3796 | 33895 | AN9048 |
| 1972 | CONTIG168 | 194562 | 194841 | 0.96 | 1.08E-01 | transcription_start_site | + | 199671 | 199671 | -4969 | 33896 | AN9048 |
| 139  | CONTIG168 | 197780 | 198294 | 2.98 | 0.00E+00 | transcription_start_site | + | 202302 | 202302 | -4265 | 33902 | AN9049 |
| 139  | CONTIG168 | 197780 | 198294 | 2.98 | 0.00E+00 | transcription_start_site | + | 202438 | 202438 | -4401 | 33903 | AN9049 |
| 2097 | CONTIG169 | 25285  | 25859  | 0.88 | 9.90E-02 | transcription_start_site | + | 24490  | 24490  | 1082  | 33944 | AN9063 |
| 2097 | CONTIG169 | 25285  | 25859  | 0.88 | 9.90E-02 | transcription_start_site | + | 25655  | 25655  | -83   | 33945 | AN9064 |
| 2097 | CONTIG169 | 25285  | 25859  | 0.88 | 9.90E-02 | transcription_start_site | + | 25730  | 25730  | -158  | 33946 | AN9064 |
| 2097 | CONTIG169 | 25285  | 25859  | 0.88 | 9.90E-02 | transcription_start_site | + | 25901  | 25901  | -329  | 33947 | AN9064 |
| 2097 | CONTIG169 | 25285  | 25859  | 0.88 | 9.90E-02 | transcription_start_site | + | 28768  | 28768  | -3196 | 33951 | AN9066 |
| 2097 | CONTIG169 | 25285  | 25859  | 0.88 | 9.90E-02 | transcription_start_site | + | 29073  | 29073  | -3501 | 33952 | AN9066 |
| 2097 | CONTIG169 | 25285  | 25859  | 0.88 | 9.90E-02 | transcription_start_site | + | 30391  | 30391  | -4819 | 33953 | AN9066 |
| 2097 | CONTIG169 | 25285  | 25859  | 0.88 | 9.90E-02 | transcription_start_site | + | 30618  | 30618  | -5046 | 33954 | AN9066 |
| 2212 | CONTIG169 | 34445  | 35027  | 0.78 | 1.57E-01 | transcription_start_site | - | 33882  | 33882  | -854  | 33955 | AN9067 |
| 2212 | CONTIG169 | 34445  | 35027  | 0.78 | 1.57E-01 | transcription_start_site | - | 33506  | 33506  | -1230 | 33956 | AN9067 |
| 2212 | CONTIG169 | 34445  | 35027  | 0.78 | 1.57E-01 | transcription_start_site | - | 33287  | 33287  | -1449 | 33957 | AN9067 |
| 2212 | CONTIG169 | 34445  | 35027  | 0.78 | 1.57E-01 | transcription_start_site | - | 31350  | 31350  | -3386 | 33958 | AN9067 |
| 2212 | CONTIG169 | 34445  | 35027  | 0.78 | 1.57E-01 | transcription_start_site | + | 35393  | 35393  | -657  | 33959 | AN9068 |
| 2212 | CONTIG169 | 34445  | 35027  | 0.78 | 1.57E-01 | transcription_start_site | + | 36463  | 36463  | -1727 | 33960 | AN9068 |
| 1124 | CONTIG169 | 41035  | 41320  | 1.59 | 1.25E-02 | transcription_start_site | - | 39971  | 39971  | -1206 | 33961 | AN9069 |
| 1124 | CONTIG169 | 41035  | 41320  | 1.59 | 1.25E-02 | transcription_start_site | - | 39885  | 39885  | -1292 | 33962 | AN9069 |
| 1124 | CONTIG169 | 41035  | 41320  | 1.59 | 1.25E-02 | transcription_start_site | - | 38964  | 38964  | -2213 | 33963 | AN9069 |
| 1124 | CONTIG169 | 41035  | 41320  | 1.59 | 1.25E-02 | transcription_start_site | - | 38758  | 38758  | -2419 | 33964 | AN9069 |
| 1124 | CONTIG169 | 41035  | 41320  | 1.59 | 1.25E-02 | transcription_start_site | - | 38472  | 38472  | -2705 | 33965 | AN9069 |
| 113  | CONTIG169 | 53105  | 53392  | 3.05 | 0.00E+00 | transcription_start_site | - | 52799  | 52799  | -449  | 33973 | AN9073 |
| 1567 | CONTIG169 | 54685  | 55108  | 1.22 | 4.78E-02 | transcription_start_site | - | 52799  | 52799  | -2097 | 33973 | AN9073 |
| 113  | CONTIG169 | 53105  | 53392  | 3.05 | 0.00E+00 | transcription_start_site | - | 53685  | 53685  | 436   | 33975 | AN9074 |
| 1567 | CONTIG169 | 54685  | 55108  | 1.22 | 4.78E-02 | transcription_start_site | - | 54718  | 54718  | -178  | 33974 | AN9074 |
| 1567 | CONTIG169 | 54685  | 55108  | 1.22 | 4.78E-02 | transcription_start_site | - | 53685  | 53685  | -1211 | 33975 | AN9074 |
| 1944 | CONTIG169 | 95716  | 96070  | 0.98 | 1.08E-01 | transcription_start_site | - | 93413  | 93413  | -2480 | 34000 | AN9085 |
| 1944 | CONTIG169 | 95716  | 96070  | 0.98 | 1.08E-01 | transcription_start_site | - | 93207  | 93207  | -2686 | 34001 | AN9085 |
| 1944 | CONTIG169 | 95716  | 96070  | 0.98 | 1.08E-01 | transcription_start_site | - | 93109  | 93109  | -2784 | 34002 | AN9085 |
| 1944 | CONTIG169 | 95716  | 96070  | 0.98 | 1.08E-01 | transcription_start_site | - | 92974  | 92974  | -2919 | 34003 | AN9085 |
| 1944 | CONTIG169 | 95716  | 96070  | 0.98 | 1.08E-01 | transcription_start_site | - | 92164  | 92164  | -3729 | 34004 | AN9085 |
| 1944 | CONTIG169 | 95716  | 96070  | 0.98 | 1.08E-01 | transcription_start_site | + | 96855  | 96855  | -962  | 34009 | AN9087 |
| 1944 | CONTIG169 | 95716  | 96070  | 0.98 | 1.08E-01 | transcription_start_site | + | 97382  | 97382  | -1489 | 34010 | AN9087 |
| 1944 | CONTIG169 | 95716  | 96070  | 0.98 | 1.08E-01 | transcription_start_site | + | 97635  | 97635  | -1742 | 34011 | AN9087 |
| 1944 | CONTIG169 | 95716  | 96070  | 0.98 | 1.08E-01 | transcription_start_site | + | 98983  | 98983  | -3090 | 34012 | AN9087 |
| 1944 | CONTIG169 | 95716  | 96070  | 0.98 | 1.08E-01 | transcription_start_site | + | 99300  | 99300  | -3407 | 34013 | AN9087 |
| 114  | CONTIG169 | 110271 | 111139 | 3.05 | 0.00E+00 | transcription_start_site | - | 105336 | 105336 | -5369 | 34018 | AN9089 |
| 114  | CONTIG169 | 110271 | 111139 | 3.05 | 0.00E+00 | transcription_start_site | - | 108190 | 108190 | -2515 | 34024 | AN9090 |
| 114  | CONTIG169 | 110271 | 111139 | 3.05 | 0.00E+00 | transcription_start_site | - | 107899 | 107899 | -2806 | 34025 | AN9090 |
| 114  | CONTIG169 | 110271 | 111139 | 3.05 | 0.00E+00 | transcription_start_site | - | 107739 | 107739 | -2966 | 34026 | AN9090 |
| 558  | CONTIG169 | 142733 | 143017 | 2.24 | 3.81E-04 | transcription_start_site | - | 141980 | 141980 | -895  | 34065 | AN9100 |
| 558  | CONTIG169 | 142733 | 143017 | 2.24 | 3.81E-04 | transcription_start_site | - | 141506 | 141506 | -1369 | 34066 | AN9100 |
| 558  | CONTIG169 | 142733 | 143017 | 2.24 | 3.81E-04 | transcription_start_site | + | 144995 | 144995 | -2120 | 34070 | AN9102 |
| 987  | CONTIG169 | 169210 | 169714 | 1.73 | 3.81E-03 | transcription_start_site | - | 168529 | 168529 | -933  | 34099 | AN9109 |



|      |           |        |        |      |          |                          |   |        |        |       |       |        |
|------|-----------|--------|--------|------|----------|--------------------------|---|--------|--------|-------|-------|--------|
| 987  | CONTIG169 | 169210 | 169714 | 1.73 | 3.81E-03 | transcription_start_site | - | 166172 | 166172 | -3290 | 34100 | AN9109 |
| 987  | CONTIG169 | 169210 | 169714 | 1.73 | 3.81E-03 | transcription_start_site | - | 165619 | 165619 | -3843 | 34101 | AN9109 |
| 1533 | CONTIG169 | 206493 | 206762 | 1.25 | 4.20E-02 | transcription_start_site | - | 203397 | 203397 | -3230 | 34152 | AN9124 |
| 1533 | CONTIG169 | 206493 | 206762 | 1.25 | 4.20E-02 | transcription_start_site | - | 203277 | 203277 | -3350 | 34153 | AN9124 |
| 1533 | CONTIG169 | 206493 | 206762 | 1.25 | 4.20E-02 | transcription_start_site | - | 203034 | 203034 | -3593 | 34154 | AN9124 |
| 1533 | CONTIG169 | 206493 | 206762 | 1.25 | 4.20E-02 | transcription_start_site | - | 201668 | 201668 | -4959 | 34155 | AN9124 |
| 1533 | CONTIG169 | 206493 | 206762 | 1.25 | 4.20E-02 | transcription_start_site | - | 206401 | 206401 | -226  | 34158 | AN9126 |
| 200  | CONTIG169 | 219994 | 220403 | 2.81 | 0.00E+00 | transcription_start_site | - | 219310 | 219310 | -888  | 34173 | AN9130 |
| 200  | CONTIG169 | 219994 | 220403 | 2.81 | 0.00E+00 | transcription_start_site | + | 220664 | 220664 | -465  | 34174 | AN9131 |
| 200  | CONTIG169 | 219994 | 220403 | 2.81 | 0.00E+00 | transcription_start_site | + | 221898 | 221898 | -1699 | 34175 | AN9131 |
| 115  | CONTIG169 | 238070 | 238404 | 3.05 | 0.00E+00 | transcription_start_site | - | 237271 | 237271 | -966  | 34184 | AN9136 |
| 115  | CONTIG169 | 238070 | 238404 | 3.05 | 0.00E+00 | transcription_start_site | - | 237070 | 237070 | -1167 | 34185 | AN9136 |
| 115  | CONTIG169 | 238070 | 238404 | 3.05 | 0.00E+00 | transcription_start_site | - | 236950 | 236950 | -1287 | 34186 | AN9136 |
| 1676 | CONTIG169 | 237003 | 237579 | 1.15 | 6.04E-02 | transcription_start_site | - | 237271 | 237271 | -20   | 34184 | AN9136 |
| 1676 | CONTIG169 | 237003 | 237579 | 1.15 | 6.04E-02 | transcription_start_site | - | 237070 | 237070 | -221  | 34185 | AN9136 |
| 1676 | CONTIG169 | 237003 | 237579 | 1.15 | 6.04E-02 | transcription_start_site | - | 236950 | 236950 | -341  | 34186 | AN9136 |
| 2265 | CONTIG169 | 239716 | 240876 | 0.71 | 6.32E-02 | transcription_start_site | - | 237271 | 237271 | -3025 | 34184 | AN9136 |
| 2265 | CONTIG169 | 239716 | 240876 | 0.71 | 6.32E-02 | transcription_start_site | - | 237070 | 237070 | -3226 | 34185 | AN9136 |
| 2265 | CONTIG169 | 239716 | 240876 | 0.71 | 6.32E-02 | transcription_start_site | - | 236950 | 236950 | -3346 | 34186 | AN9136 |
| 115  | CONTIG169 | 238070 | 238404 | 3.05 | 0.00E+00 | transcription_start_site | + | 239794 | 239794 | -1557 | 34187 | AN9137 |
| 115  | CONTIG169 | 238070 | 238404 | 3.05 | 0.00E+00 | transcription_start_site | + | 239952 | 239952 | -1715 | 34188 | AN9137 |
| 115  | CONTIG169 | 238070 | 238404 | 3.05 | 0.00E+00 | transcription_start_site | + | 240359 | 240359 | -2122 | 34189 | AN9137 |
| 1676 | CONTIG169 | 237003 | 237579 | 1.15 | 6.04E-02 | transcription_start_site | + | 239794 | 239794 | -2503 | 34187 | AN9137 |
| 1676 | CONTIG169 | 237003 | 237579 | 1.15 | 6.04E-02 | transcription_start_site | + | 239952 | 239952 | -2661 | 34188 | AN9137 |
| 1676 | CONTIG169 | 237003 | 237579 | 1.15 | 6.04E-02 | transcription_start_site | + | 240359 | 240359 | -3068 | 34189 | AN9137 |
| 2265 | CONTIG169 | 239716 | 240876 | 0.71 | 6.32E-02 | transcription_start_site | + | 240359 | 240359 | -63   | 34189 | AN9137 |
| 2265 | CONTIG169 | 239716 | 240876 | 0.71 | 6.32E-02 | transcription_start_site | + | 239952 | 239952 | 344   | 34188 | AN9137 |
| 2265 | CONTIG169 | 239716 | 240876 | 0.71 | 6.32E-02 | transcription_start_site | + | 239794 | 239794 | 502   | 34187 | AN9137 |
| 115  | CONTIG169 | 238070 | 238404 | 3.05 | 0.00E+00 | transcription_start_site | + | 240782 | 240782 | -2545 | 34190 | AN9138 |
| 115  | CONTIG169 | 238070 | 238404 | 3.05 | 0.00E+00 | transcription_start_site | + | 240890 | 240890 | -2653 | 34191 | AN9138 |
| 115  | CONTIG169 | 238070 | 238404 | 3.05 | 0.00E+00 | transcription_start_site | + | 241334 | 241334 | -3097 | 34192 | AN9138 |
| 115  | CONTIG169 | 238070 | 238404 | 3.05 | 0.00E+00 | transcription_start_site | + | 241866 | 241866 | -3629 | 34193 | AN9138 |
| 1676 | CONTIG169 | 237003 | 237579 | 1.15 | 6.04E-02 | transcription_start_site | + | 240782 | 240782 | -3491 | 34190 | AN9138 |
| 1676 | CONTIG169 | 237003 | 237579 | 1.15 | 6.04E-02 | transcription_start_site | + | 240890 | 240890 | -3599 | 34191 | AN9138 |
| 1676 | CONTIG169 | 237003 | 237579 | 1.15 | 6.04E-02 | transcription_start_site | + | 241334 | 241334 | -4043 | 34192 | AN9138 |
| 1676 | CONTIG169 | 237003 | 237579 | 1.15 | 6.04E-02 | transcription_start_site | + | 241866 | 241866 | -4575 | 34193 | AN9138 |
| 2265 | CONTIG169 | 239716 | 240876 | 0.71 | 6.32E-02 | transcription_start_site | + | 240782 | 240782 | -486  | 34190 | AN9138 |
| 2265 | CONTIG169 | 239716 | 240876 | 0.71 | 6.32E-02 | transcription_start_site | + | 240890 | 240890 | -594  | 34191 | AN9138 |
| 2265 | CONTIG169 | 239716 | 240876 | 0.71 | 6.32E-02 | transcription_start_site | + | 241334 | 241334 | -1038 | 34192 | AN9138 |
| 2265 | CONTIG169 | 239716 | 240876 | 0.71 | 6.32E-02 | transcription_start_site | + | 241866 | 241866 | -1570 | 34193 | AN9138 |
| 115  | CONTIG169 | 238070 | 238404 | 3.05 | 0.00E+00 | transcription_start_site | + | 242980 | 242980 | -4743 | 34194 | AN9139 |
| 2265 | CONTIG169 | 239716 | 240876 | 0.71 | 6.32E-02 | transcription_start_site | + | 242980 | 242980 | -2684 | 34194 | AN9139 |
| 2265 | CONTIG169 | 239716 | 240876 | 0.71 | 6.32E-02 | transcription_start_site | + | 243542 | 243542 | -3246 | 34195 | AN9139 |
| 2265 | CONTIG169 | 239716 | 240876 | 0.71 | 6.32E-02 | transcription_start_site | + | 243862 | 243862 | -3566 | 34196 | AN9139 |
| 1530 | CONTIG169 | 261166 | 262175 | 1.25 | 9.64E-03 | transcription_start_site | - | 261947 | 261947 | 276   | 34213 | AN9145 |
| 1530 | CONTIG169 | 261166 | 262175 | 1.25 | 9.64E-03 | transcription_start_site | - | 262138 | 262138 | 467   | 34212 | AN9145 |
| 1530 | CONTIG169 | 261166 | 262175 | 1.25 | 9.64E-03 | transcription_start_site | + | 264646 | 264646 | -2975 | 34214 | AN9146 |
| 1530 | CONTIG169 | 261166 | 262175 | 1.25 | 9.64E-03 | transcription_start_site | + | 265308 | 265308 | -3637 | 34215 | AN9146 |
| 1530 | CONTIG169 | 261166 | 262175 | 1.25 | 9.64E-03 | transcription_start_site | + | 266721 | 266721 | -5050 | 34216 | AN9146 |
| 2213 | CONTIG169 | 271352 | 272076 | 0.78 | 1.57E-01 | transcription_start_site | + | 271672 | 271672 | 42    | 34218 | AN9147 |
| 2213 | CONTIG169 | 271352 | 272076 | 0.78 | 1.57E-01 | transcription_start_site | + | 271532 | 271532 | 182   | 34217 | AN9147 |
| 2213 | CONTIG169 | 271352 | 272076 | 0.78 | 1.57E-01 | transcription_start_site | + | 272967 | 272967 | -1253 | 34219 | AN9147 |
| 2213 | CONTIG169 | 271352 | 272076 | 0.78 | 1.57E-01 | transcription_start_site | + | 273341 | 273341 | -1627 | 34220 | AN9147 |
| 2213 | CONTIG169 | 271352 | 272076 | 0.78 | 1.57E-01 | transcription_start_site | + | 273892 | 273892 | -2178 | 34221 | AN9147 |
| 1275 | CONTIG169 | 277357 | 278022 | 1.46 | 8.99E-03 | transcription_start_site | - | 277347 | 277347 | -342  | 34222 | AN9148 |
| 1275 | CONTIG169 | 277357 | 278022 | 1.46 | 8.99E-03 | transcription_start_site | - | 276829 | 276829 | -860  | 34223 | AN9148 |
| 956  | CONTIG169 | 284868 | 285282 | 1.76 | 7.08E-03 | transcription_start_site | - | 284030 | 284030 | -1045 | 34224 | AN9149 |

|      |           |        |        |      |          |                          |   |        |        |       |       |        |
|------|-----------|--------|--------|------|----------|--------------------------|---|--------|--------|-------|-------|--------|
| 956  | CONTIG169 | 284868 | 285282 | 1.76 | 7.08E-03 | transcription_start_site | - | 283756 | 283756 | -1319 | 34225 | AN9149 |
| 956  | CONTIG169 | 284868 | 285282 | 1.76 | 7.08E-03 | transcription_start_site | - | 283635 | 283635 | -1440 | 34226 | AN9149 |
| 956  | CONTIG169 | 284868 | 285282 | 1.76 | 7.08E-03 | transcription_start_site | - | 283333 | 283333 | -1742 | 34227 | AN9149 |
| 956  | CONTIG169 | 284868 | 285282 | 1.76 | 7.08E-03 | transcription_start_site | - | 280867 | 280867 | -4208 | 34228 | AN9149 |
| 956  | CONTIG169 | 284868 | 285282 | 1.76 | 7.08E-03 | transcription_start_site | - | 280674 | 280674 | -4401 | 34229 | AN9149 |
| 1770 | CONTIG169 | 286658 | 287017 | 1.09 | 7.66E-02 | transcription_start_site | - | 284030 | 284030 | -2807 | 34224 | AN9149 |
| 1770 | CONTIG169 | 286658 | 287017 | 1.09 | 7.66E-02 | transcription_start_site | - | 283756 | 283756 | -3081 | 34225 | AN9149 |
| 1770 | CONTIG169 | 286658 | 287017 | 1.09 | 7.66E-02 | transcription_start_site | - | 283635 | 283635 | -3202 | 34226 | AN9149 |
| 1770 | CONTIG169 | 286658 | 287017 | 1.09 | 7.66E-02 | transcription_start_site | - | 283333 | 283333 | -3504 | 34227 | AN9149 |
| 678  | CONTIG169 | 289368 | 289853 | 2.07 | 1.44E-03 | transcription_start_site | + | 294378 | 294378 | -4767 | 34230 | AN9151 |
| 678  | CONTIG169 | 289368 | 289853 | 2.07 | 1.44E-03 | transcription_start_site | + | 294599 | 294599 | -4988 | 34231 | AN9151 |
| 1386 | CONTIG169 | 326716 | 327125 | 1.36 | 3.01E-02 | transcription_start_site | - | 322682 | 322682 | -4238 | 34243 | AN9157 |
| 1386 | CONTIG169 | 326716 | 327125 | 1.36 | 3.01E-02 | transcription_start_site | - | 322265 | 322265 | -4655 | 34244 | AN9157 |
| 1386 | CONTIG169 | 326716 | 327125 | 1.36 | 3.01E-02 | transcription_start_site | - | 322138 | 322138 | -4782 | 34245 | AN9157 |
| 1386 | CONTIG169 | 326716 | 327125 | 1.36 | 3.01E-02 | transcription_start_site | - | 321800 | 321800 | -5120 | 34246 | AN9157 |
| 1386 | CONTIG169 | 326716 | 327125 | 1.36 | 3.01E-02 | transcription_start_site | - | 326514 | 326514 | -406  | 34249 | AN9159 |
| 1386 | CONTIG169 | 326716 | 327125 | 1.36 | 3.01E-02 | transcription_start_site | - | 325941 | 325941 | -979  | 34250 | AN9159 |
| 1386 | CONTIG169 | 326716 | 327125 | 1.36 | 3.01E-02 | transcription_start_site | - | 325494 | 325494 | -1426 | 34251 | AN9159 |
| 1386 | CONTIG169 | 326716 | 327125 | 1.36 | 3.01E-02 | transcription_start_site | + | 331482 | 331482 | -4561 | 34252 | AN9161 |
| 1386 | CONTIG169 | 326716 | 327125 | 1.36 | 3.01E-02 | transcription_start_site | + | 331591 | 331591 | -4670 | 34253 | AN9161 |
| 681  | CONTIG169 | 347634 | 348002 | 2.07 | 1.62E-03 | transcription_start_site | - | 347235 | 347235 | -583  | 34278 | AN9167 |
| 1771 | CONTIG169 | 349881 | 350602 | 1.09 | 7.66E-02 | transcription_start_site | - | 347235 | 347235 | -3006 | 34278 | AN9167 |
| 1771 | CONTIG169 | 349881 | 350602 | 1.09 | 7.66E-02 | transcription_start_site | - | 350512 | 350512 | 270   | 34279 | AN9168 |
| 215  | CONTIG170 | 12451  | 13115  | 2.79 | 0.00E+00 | transcription_start_site | - | 7548   | 7548   | -5235 | 34291 | AN9171 |
| 1397 | CONTIG170 | 7501   | 8017   | 1.35 | 2.05E-02 | transcription_start_site | - | 7548   | 7548   | -211  | 34291 | AN9171 |
| 1397 | CONTIG170 | 7501   | 8017   | 1.35 | 2.05E-02 | transcription_start_site | - | 7410   | 7410   | -349  | 34292 | AN9171 |
| 1397 | CONTIG170 | 7501   | 8017   | 1.35 | 2.05E-02 | transcription_start_site | - | 7288   | 7288   | -471  | 34293 | AN9171 |
| 1397 | CONTIG170 | 7501   | 8017   | 1.35 | 2.05E-02 | transcription_start_site | + | 8311   | 8311   | -552  | 34294 | AN9172 |
| 1397 | CONTIG170 | 7501   | 8017   | 1.35 | 2.05E-02 | transcription_start_site | + | 9017   | 9017   | -1258 | 34295 | AN9172 |
| 1397 | CONTIG170 | 7501   | 8017   | 1.35 | 2.05E-02 | transcription_start_site | + | 9216   | 9216   | -1457 | 34296 | AN9172 |
| 215  | CONTIG170 | 12451  | 13115  | 2.79 | 0.00E+00 | transcription_start_site | - | 12125  | 12125  | -658  | 34297 | AN9173 |
| 215  | CONTIG170 | 12451  | 13115  | 2.79 | 0.00E+00 | transcription_start_site | - | 12046  | 12046  | -737  | 34298 | AN9173 |
| 215  | CONTIG170 | 12451  | 13115  | 2.79 | 0.00E+00 | transcription_start_site | - | 11680  | 11680  | -1103 | 34299 | AN9173 |
| 215  | CONTIG170 | 12451  | 13115  | 2.79 | 0.00E+00 | transcription_start_site | - | 11525  | 11525  | -1258 | 34300 | AN9173 |
| 215  | CONTIG170 | 12451  | 13115  | 2.79 | 0.00E+00 | transcription_start_site | - | 11000  | 11000  | -1783 | 34301 | AN9173 |
| 215  | CONTIG170 | 12451  | 13115  | 2.79 | 0.00E+00 | transcription_start_site | + | 15157  | 15157  | -2374 | 34302 | AN9174 |
| 215  | CONTIG170 | 12451  | 13115  | 2.79 | 0.00E+00 | transcription_start_site | + | 15803  | 15803  | -3020 | 34303 | AN9174 |
| 215  | CONTIG170 | 12451  | 13115  | 2.79 | 0.00E+00 | transcription_start_site | + | 16333  | 16333  | -3550 | 34304 | AN9174 |
| 955  | CONTIG170 | 35494  | 35768  | 1.76 | 4.01E-03 | transcription_start_site | + | 35018  | 35018  | 613   | 34315 | AN9179 |
| 955  | CONTIG170 | 35494  | 35768  | 1.76 | 4.01E-03 | transcription_start_site | + | 34565  | 34565  | 1066  | 34314 | AN9179 |
| 955  | CONTIG170 | 35494  | 35768  | 1.76 | 4.01E-03 | transcription_start_site | + | 35774  | 35774  | -143  | 34316 | AN9180 |
| 1800 | CONTIG170 | 48904  | 49336  | 1.07 | 6.04E-02 | transcription_start_site | - | 45716  | 45716  | -3404 | 34319 | AN9183 |
| 1800 | CONTIG170 | 48904  | 49336  | 1.07 | 6.04E-02 | transcription_start_site | - | 45403  | 45403  | -3717 | 34320 | AN9183 |
| 1800 | CONTIG170 | 48904  | 49336  | 1.07 | 6.04E-02 | transcription_start_site | - | 48151  | 48151  | -969  | 34321 | AN9184 |
| 1800 | CONTIG170 | 48904  | 49336  | 1.07 | 6.04E-02 | transcription_start_site | - | 47973  | 47973  | -1147 | 34322 | AN9184 |
| 1800 | CONTIG170 | 48904  | 49336  | 1.07 | 6.04E-02 | transcription_start_site | - | 47538  | 47538  | -1582 | 34323 | AN9184 |
| 1800 | CONTIG170 | 48904  | 49336  | 1.07 | 6.04E-02 | transcription_start_site | - | 49634  | 49634  | 514   | 34325 | AN9185 |
| 1800 | CONTIG170 | 48904  | 49336  | 1.07 | 6.04E-02 | transcription_start_site | - | 49815  | 49815  | 695   | 34324 | AN9185 |
| 1215 | CONTIG170 | 55069  | 55478  | 1.51 | 1.06E-02 | transcription_start_site | - | 52417  | 52417  | -2856 | 34326 | AN9186 |
| 1215 | CONTIG170 | 55069  | 55478  | 1.51 | 1.06E-02 | transcription_start_site | - | 51979  | 51979  | -3294 | 34327 | AN9186 |
| 1215 | CONTIG170 | 55069  | 55478  | 1.51 | 1.06E-02 | transcription_start_site | - | 54896  | 54896  | -377  | 34328 | AN9187 |
| 1564 | CONTIG170 | 59487  | 59826  | 1.22 | 3.34E-02 | transcription_start_site | - | 54896  | 54896  | -4760 | 34328 | AN9187 |
| 1215 | CONTIG170 | 55069  | 55478  | 1.51 | 1.06E-02 | transcription_start_site | + | 55558  | 55558  | -284  | 34329 | AN9188 |
| 1215 | CONTIG170 | 55069  | 55478  | 1.51 | 1.06E-02 | transcription_start_site | + | 55608  | 55608  | -334  | 34330 | AN9188 |
| 1215 | CONTIG170 | 55069  | 55478  | 1.51 | 1.06E-02 | transcription_start_site | + | 55829  | 55829  | -555  | 34331 | AN9188 |
| 1215 | CONTIG170 | 55069  | 55478  | 1.51 | 1.06E-02 | transcription_start_site | + | 56032  | 56032  | -758  | 34332 | AN9188 |
| 1564 | CONTIG170 | 59487  | 59826  | 1.22 | 3.34E-02 | transcription_start_site | - | 57973  | 57973  | -1683 | 34333 | AN9189 |

|      |           |        |        |      |          |                          |   |        |        |       |       |        |
|------|-----------|--------|--------|------|----------|--------------------------|---|--------|--------|-------|-------|--------|
| 1564 | CONTIG170 | 59487  | 59826  | 1.22 | 3.34E-02 | transcription_start_site | - | 57488  | 57488  | -2168 | 34334 | AN9189 |
| 1613 | CONTIG170 | 63017  | 63426  | 1.19 | 3.70E-02 | transcription_start_site | - | 61554  | 61554  | -1667 | 34335 | AN9191 |
| 1080 | CONTIG170 | 66832  | 67107  | 1.63 | 7.08E-03 | transcription_start_site | - | 63199  | 63199  | -3770 | 34336 | AN9192 |
| 1080 | CONTIG170 | 66832  | 67107  | 1.63 | 7.08E-03 | transcription_start_site | - | 63061  | 63061  | -3908 | 34337 | AN9192 |
| 1080 | CONTIG170 | 66832  | 67107  | 1.63 | 7.08E-03 | transcription_start_site | - | 62150  | 62150  | -4819 | 34338 | AN9192 |
| 1080 | CONTIG170 | 66832  | 67107  | 1.63 | 7.08E-03 | transcription_start_site | - | 61845  | 61845  | -5124 | 34339 | AN9192 |
| 1613 | CONTIG170 | 63017  | 63426  | 1.19 | 3.70E-02 | transcription_start_site | - | 63199  | 63199  | -22   | 34336 | AN9192 |
| 1613 | CONTIG170 | 63017  | 63426  | 1.19 | 3.70E-02 | transcription_start_site | - | 63061  | 63061  | -160  | 34337 | AN9192 |
| 1613 | CONTIG170 | 63017  | 63426  | 1.19 | 3.70E-02 | transcription_start_site | - | 62150  | 62150  | -1071 | 34338 | AN9192 |
| 1613 | CONTIG170 | 63017  | 63426  | 1.19 | 3.70E-02 | transcription_start_site | - | 61845  | 61845  | -1376 | 34339 | AN9192 |
| 2286 | CONTIG170 | 67517  | 68316  | 0.69 | 1.81E-01 | transcription_start_site | - | 63199  | 63199  | -4717 | 34336 | AN9192 |
| 2286 | CONTIG170 | 67517  | 68316  | 0.69 | 1.81E-01 | transcription_start_site | - | 63061  | 63061  | -4855 | 34337 | AN9192 |
| 1564 | CONTIG170 | 59487  | 59826  | 1.22 | 3.34E-02 | transcription_start_site | + | 64207  | 64207  | -4550 | 34340 | AN9193 |
| 1564 | CONTIG170 | 59487  | 59826  | 1.22 | 3.34E-02 | transcription_start_site | + | 64317  | 64317  | -4660 | 34341 | AN9193 |
| 1564 | CONTIG170 | 59487  | 59826  | 1.22 | 3.34E-02 | transcription_start_site | + | 64485  | 64485  | -4828 | 34342 | AN9193 |
| 1564 | CONTIG170 | 59487  | 59826  | 1.22 | 3.34E-02 | transcription_start_site | + | 64796  | 64796  | -5139 | 34343 | AN9193 |
| 1613 | CONTIG170 | 63017  | 63426  | 1.19 | 3.70E-02 | transcription_start_site | + | 64207  | 64207  | -985  | 34340 | AN9193 |
| 1613 | CONTIG170 | 63017  | 63426  | 1.19 | 3.70E-02 | transcription_start_site | + | 64317  | 64317  | -1095 | 34341 | AN9193 |
| 1613 | CONTIG170 | 63017  | 63426  | 1.19 | 3.70E-02 | transcription_start_site | + | 64485  | 64485  | -1263 | 34342 | AN9193 |
| 1613 | CONTIG170 | 63017  | 63426  | 1.19 | 3.70E-02 | transcription_start_site | + | 64796  | 64796  | -1574 | 34343 | AN9193 |
| 1080 | CONTIG170 | 66832  | 67107  | 1.63 | 7.08E-03 | transcription_start_site | + | 67013  | 67013  | -43   | 34344 | AN9194 |
| 1080 | CONTIG170 | 66832  | 67107  | 1.63 | 7.08E-03 | transcription_start_site | + | 67543  | 67543  | -573  | 34345 | AN9194 |
| 1080 | CONTIG170 | 66832  | 67107  | 1.63 | 7.08E-03 | transcription_start_site | + | 67702  | 67702  | -732  | 34346 | AN9194 |
| 1080 | CONTIG170 | 66832  | 67107  | 1.63 | 7.08E-03 | transcription_start_site | + | 67936  | 67936  | -966  | 34347 | AN9194 |
| 1613 | CONTIG170 | 63017  | 63426  | 1.19 | 3.70E-02 | transcription_start_site | + | 67013  | 67013  | -3791 | 34344 | AN9194 |
| 1613 | CONTIG170 | 63017  | 63426  | 1.19 | 3.70E-02 | transcription_start_site | + | 67543  | 67543  | -4321 | 34345 | AN9194 |
| 1613 | CONTIG170 | 63017  | 63426  | 1.19 | 3.70E-02 | transcription_start_site | + | 67702  | 67702  | -4480 | 34346 | AN9194 |
| 1613 | CONTIG170 | 63017  | 63426  | 1.19 | 3.70E-02 | transcription_start_site | + | 67936  | 67936  | -4714 | 34347 | AN9194 |
| 1614 | CONTIG170 | 68407  | 68833  | 1.19 | 3.70E-02 | transcription_start_site | + | 67936  | 67936  | 684   | 34347 | AN9194 |
| 1614 | CONTIG170 | 68407  | 68833  | 1.19 | 3.70E-02 | transcription_start_site | + | 67702  | 67702  | 918   | 34346 | AN9194 |
| 1614 | CONTIG170 | 68407  | 68833  | 1.19 | 3.70E-02 | transcription_start_site | + | 67543  | 67543  | 1077  | 34345 | AN9194 |
| 2286 | CONTIG170 | 67517  | 68316  | 0.69 | 1.81E-01 | transcription_start_site | + | 67936  | 67936  | -19   | 34347 | AN9194 |
| 2286 | CONTIG170 | 67517  | 68316  | 0.69 | 1.81E-01 | transcription_start_site | + | 67702  | 67702  | 214   | 34346 | AN9194 |
| 2286 | CONTIG170 | 67517  | 68316  | 0.69 | 1.81E-01 | transcription_start_site | + | 67543  | 67543  | 373   | 34345 | AN9194 |
| 2286 | CONTIG170 | 67517  | 68316  | 0.69 | 1.81E-01 | transcription_start_site | + | 67013  | 67013  | 903   | 34344 | AN9194 |
| 901  | CONTIG170 | 69306  | 69742  | 1.82 | 0.00E+00 | transcription_start_site | + | 69587  | 69587  | -63   | 34348 | AN9195 |
| 1080 | CONTIG170 | 66832  | 67107  | 1.63 | 7.08E-03 | transcription_start_site | + | 69587  | 69587  | -2617 | 34348 | AN9195 |
| 1614 | CONTIG170 | 68407  | 68833  | 1.19 | 3.70E-02 | transcription_start_site | + | 69587  | 69587  | -967  | 34348 | AN9195 |
| 2286 | CONTIG170 | 67517  | 68316  | 0.69 | 1.81E-01 | transcription_start_site | + | 69587  | 69587  | -1670 | 34348 | AN9195 |
| 901  | CONTIG170 | 69306  | 69742  | 1.82 | 0.00E+00 | transcription_start_site | + | 72373  | 72373  | -2849 | 34349 | AN9196 |
| 901  | CONTIG170 | 69306  | 69742  | 1.82 | 0.00E+00 | transcription_start_site | + | 72945  | 72945  | -3421 | 34350 | AN9196 |
| 1614 | CONTIG170 | 68407  | 68833  | 1.19 | 3.70E-02 | transcription_start_site | + | 72373  | 72373  | -3753 | 34349 | AN9196 |
| 1614 | CONTIG170 | 68407  | 68833  | 1.19 | 3.70E-02 | transcription_start_site | + | 72945  | 72945  | -4325 | 34350 | AN9196 |
| 2286 | CONTIG170 | 67517  | 68316  | 0.69 | 1.81E-01 | transcription_start_site | + | 72373  | 72373  | -4456 | 34349 | AN9196 |
| 2286 | CONTIG170 | 67517  | 68316  | 0.69 | 1.81E-01 | transcription_start_site | + | 72945  | 72945  | -5028 | 34350 | AN9196 |
| 617  | CONTIG170 | 81379  | 81728  | 2.16 | 2.51E-04 | transcription_start_site | - | 78964  | 78964  | -2589 | 34353 | AN9198 |
| 617  | CONTIG170 | 81379  | 81728  | 2.16 | 2.51E-04 | transcription_start_site | - | 78881  | 78881  | -2672 | 34354 | AN9198 |
| 617  | CONTIG170 | 81379  | 81728  | 2.16 | 2.51E-04 | transcription_start_site | - | 78604  | 78604  | -2949 | 34355 | AN9198 |
| 617  | CONTIG170 | 81379  | 81728  | 2.16 | 2.51E-04 | transcription_start_site | - | 78282  | 78282  | -3271 | 34356 | AN9198 |
| 617  | CONTIG170 | 81379  | 81728  | 2.16 | 2.51E-04 | transcription_start_site | - | 77779  | 77779  | -3774 | 34357 | AN9198 |
| 617  | CONTIG170 | 81379  | 81728  | 2.16 | 2.51E-04 | transcription_start_site | - | 77665  | 77665  | -3888 | 34358 | AN9198 |
| 617  | CONTIG170 | 81379  | 81728  | 2.16 | 2.51E-04 | transcription_start_site | - | 81047  | 81047  | -506  | 34359 | AN9199 |
| 617  | CONTIG170 | 81379  | 81728  | 2.16 | 2.51E-04 | transcription_start_site | - | 80350  | 80350  | -1203 | 34360 | AN9199 |
| 617  | CONTIG170 | 81379  | 81728  | 2.16 | 2.51E-04 | transcription_start_site | + | 83753  | 83753  | -2199 | 34361 | AN9200 |
| 617  | CONTIG170 | 81379  | 81728  | 2.16 | 2.51E-04 | transcription_start_site | + | 84098  | 84098  | -2544 | 34362 | AN9200 |
| 653  | CONTIG170 | 109276 | 109638 | 2.1  | 0.00E+00 | transcription_start_site | - | 107004 | 107004 | -2453 | 34372 | AN9205 |
| 653  | CONTIG170 | 109276 | 109638 | 2.1  | 0.00E+00 | transcription_start_site | - | 106715 | 106715 | -2742 | 34373 | AN9205 |

|      |           |        |        |      |          |                          |   |        |        |       |       |        |
|------|-----------|--------|--------|------|----------|--------------------------|---|--------|--------|-------|-------|--------|
| 653  | CONTIG170 | 109276 | 109638 | 2.1  | 0.00E+00 | transcription_start_site | - | 106389 | 106389 | -3068 | 34374 | AN9205 |
| 653  | CONTIG170 | 109276 | 109638 | 2.1  | 0.00E+00 | transcription_start_site | - | 109095 | 109095 | -362  | 34375 | AN9206 |
| 653  | CONTIG170 | 109276 | 109638 | 2.1  | 0.00E+00 | transcription_start_site | - | 108648 | 108648 | -809  | 34376 | AN9206 |
| 653  | CONTIG170 | 109276 | 109638 | 2.1  | 0.00E+00 | transcription_start_site | + | 109775 | 109775 | -318  | 34377 | AN9207 |
| 653  | CONTIG170 | 109276 | 109638 | 2.1  | 0.00E+00 | transcription_start_site | + | 110128 | 110128 | -671  | 34378 | AN9207 |
| 653  | CONTIG170 | 109276 | 109638 | 2.1  | 0.00E+00 | transcription_start_site | + | 110694 | 110694 | -1237 | 34379 | AN9207 |
| 2063 | CONTIG172 | 6536   | 7492   | 0.9  | 2.89E-02 | transcription_start_site | - | 4631   | 4631   | -2383 | 34476 | AN9242 |
| 2063 | CONTIG172 | 6536   | 7492   | 0.9  | 2.89E-02 | transcription_start_site | - | 3976   | 3976   | -3038 | 34477 | AN9242 |
| 2063 | CONTIG172 | 6536   | 7492   | 0.9  | 2.89E-02 | transcription_start_site | - | 2816   | 2816   | -4198 | 34478 | AN9242 |
| 2316 | CONTIG172 | 81020  | 82569  | 0.65 | 1.64E-01 | transcription_start_site | - | 76239  | 76239  | -5555 | 34537 | AN9262 |
| 221  | CONTIG172 | 84095  | 84961  | 2.78 | 0.00E+00 | transcription_start_site | + | 83167  | 83167  | 1361  | 34543 | AN9263 |
| 2316 | CONTIG172 | 81020  | 82569  | 0.65 | 1.64E-01 | transcription_start_site | + | 81676  | 81676  | 118   | 34538 | AN9263 |
| 2316 | CONTIG172 | 81020  | 82569  | 0.65 | 1.64E-01 | transcription_start_site | + | 82004  | 82004  | -209  | 34539 | AN9263 |
| 2316 | CONTIG172 | 81020  | 82569  | 0.65 | 1.64E-01 | transcription_start_site | + | 82148  | 82148  | -353  | 34540 | AN9263 |
| 2316 | CONTIG172 | 81020  | 82569  | 0.65 | 1.64E-01 | transcription_start_site | + | 82726  | 82726  | -931  | 34541 | AN9263 |
| 2316 | CONTIG172 | 81020  | 82569  | 0.65 | 1.64E-01 | transcription_start_site | + | 82907  | 82907  | -1112 | 34542 | AN9263 |
| 2316 | CONTIG172 | 81020  | 82569  | 0.65 | 1.64E-01 | transcription_start_site | + | 83167  | 83167  | -1372 | 34543 | AN9263 |
| 296  | CONTIG172 | 149634 | 149918 | 2.63 | 0.00E+00 | transcription_start_site | - | 147731 | 147731 | -2045 | 34581 | AN9283 |
| 296  | CONTIG172 | 149634 | 149918 | 2.63 | 0.00E+00 | transcription_start_site | - | 147625 | 147625 | -2151 | 34582 | AN9283 |
| 296  | CONTIG172 | 149634 | 149918 | 2.63 | 0.00E+00 | transcription_start_site | - | 145734 | 145734 | -4042 | 34583 | AN9283 |
| 296  | CONTIG172 | 149634 | 149918 | 2.63 | 0.00E+00 | transcription_start_site | - | 145216 | 145216 | -4560 | 34584 | AN9283 |
| 296  | CONTIG172 | 149634 | 149918 | 2.63 | 0.00E+00 | transcription_start_site | - | 144662 | 144662 | -5114 | 34585 | AN9283 |
| 2227 | CONTIG172 | 150534 | 151103 | 0.77 | 1.76E-01 | transcription_start_site | - | 147731 | 147731 | -3087 | 34581 | AN9283 |
| 2227 | CONTIG172 | 150534 | 151103 | 0.77 | 1.76E-01 | transcription_start_site | - | 147625 | 147625 | -3193 | 34582 | AN9283 |
| 2227 | CONTIG172 | 150534 | 151103 | 0.77 | 1.76E-01 | transcription_start_site | - | 145734 | 145734 | -5084 | 34583 | AN9283 |
| 296  | CONTIG172 | 149634 | 149918 | 2.63 | 0.00E+00 | transcription_start_site | - | 149464 | 149464 | -312  | 34590 | AN9285 |
| 296  | CONTIG172 | 149634 | 149918 | 2.63 | 0.00E+00 | transcription_start_site | - | 149389 | 149389 | -387  | 34591 | AN9285 |
| 296  | CONTIG172 | 149634 | 149918 | 2.63 | 0.00E+00 | transcription_start_site | - | 149148 | 149148 | -628  | 34592 | AN9285 |
| 2227 | CONTIG172 | 150534 | 151103 | 0.77 | 1.76E-01 | transcription_start_site | - | 149464 | 149464 | -1354 | 34590 | AN9285 |
| 2227 | CONTIG172 | 150534 | 151103 | 0.77 | 1.76E-01 | transcription_start_site | - | 149389 | 149389 | -1429 | 34591 | AN9285 |
| 2227 | CONTIG172 | 150534 | 151103 | 0.77 | 1.76E-01 | transcription_start_site | - | 149148 | 149148 | -1670 | 34592 | AN9285 |
| 296  | CONTIG172 | 149634 | 149918 | 2.63 | 0.00E+00 | transcription_start_site | + | 153102 | 153102 | -3326 | 34594 | AN9287 |
| 296  | CONTIG172 | 149634 | 149918 | 2.63 | 0.00E+00 | transcription_start_site | + | 153366 | 153366 | -3590 | 34595 | AN9287 |
| 296  | CONTIG172 | 149634 | 149918 | 2.63 | 0.00E+00 | transcription_start_site | + | 153976 | 153976 | -4200 | 34596 | AN9287 |
| 2227 | CONTIG172 | 150534 | 151103 | 0.77 | 1.76E-01 | transcription_start_site | + | 153102 | 153102 | -2283 | 34594 | AN9287 |
| 2227 | CONTIG172 | 150534 | 151103 | 0.77 | 1.76E-01 | transcription_start_site | + | 153366 | 153366 | -2547 | 34595 | AN9287 |
| 2227 | CONTIG172 | 150534 | 151103 | 0.77 | 1.76E-01 | transcription_start_site | + | 153976 | 153976 | -3157 | 34596 | AN9287 |
| 2227 | CONTIG172 | 150534 | 151103 | 0.77 | 1.76E-01 | transcription_start_site | + | 155496 | 155496 | -4677 | 34597 | AN9288 |
| 2227 | CONTIG172 | 150534 | 151103 | 0.77 | 1.76E-01 | transcription_start_site | + | 155622 | 155622 | -4803 | 34598 | AN9288 |
| 1689 | CONTIG172 | 158704 | 159203 | 1.14 | 4.20E-02 | transcription_start_site | - | 158700 | 158700 | -253  | 34599 | AN9289 |
| 1689 | CONTIG172 | 158704 | 159203 | 1.14 | 4.20E-02 | transcription_start_site | - | 158456 | 158456 | -497  | 34600 | AN9289 |
| 1689 | CONTIG172 | 158704 | 159203 | 1.14 | 4.20E-02 | transcription_start_site | - | 157965 | 157965 | -988  | 34601 | AN9289 |
| 1689 | CONTIG172 | 158704 | 159203 | 1.14 | 4.20E-02 | transcription_start_site | - | 157140 | 157140 | -1813 | 34602 | AN9289 |
| 1689 | CONTIG172 | 158704 | 159203 | 1.14 | 4.20E-02 | transcription_start_site | - | 156982 | 156982 | -1971 | 34603 | AN9289 |
| 2291 | CONTIG172 | 164702 | 165155 | 0.68 | 1.81E-01 | transcription_start_site | - | 160980 | 160980 | -3948 | 34604 | AN9290 |
| 1689 | CONTIG172 | 158704 | 159203 | 1.14 | 4.20E-02 | transcription_start_site | + | 161835 | 161835 | -2881 | 34605 | AN9291 |
| 1689 | CONTIG172 | 158704 | 159203 | 1.14 | 4.20E-02 | transcription_start_site | + | 161916 | 161916 | -2962 | 34606 | AN9291 |
| 1689 | CONTIG172 | 158704 | 159203 | 1.14 | 4.20E-02 | transcription_start_site | + | 163234 | 163234 | -4280 | 34607 | AN9291 |
| 1689 | CONTIG172 | 158704 | 159203 | 1.14 | 4.20E-02 | transcription_start_site | + | 163746 | 163746 | -4792 | 34608 | AN9291 |
| 1689 | CONTIG172 | 158704 | 159203 | 1.14 | 4.20E-02 | transcription_start_site | + | 164097 | 164097 | -5143 | 34609 | AN9291 |
| 2291 | CONTIG172 | 164702 | 165155 | 0.68 | 1.81E-01 | transcription_start_site | + | 164578 | 164578 | 350   | 34610 | AN9291 |
| 2291 | CONTIG172 | 164702 | 165155 | 0.68 | 1.81E-01 | transcription_start_site | + | 165499 | 165499 | -570  | 34611 | AN9291 |
| 2291 | CONTIG172 | 164702 | 165155 | 0.68 | 1.81E-01 | transcription_start_site | + | 164097 | 164097 | 831   | 34609 | AN9291 |
| 2291 | CONTIG172 | 164702 | 165155 | 0.68 | 1.81E-01 | transcription_start_site | + | 163746 | 163746 | 1182  | 34608 | AN9291 |
| 2291 | CONTIG172 | 164702 | 165155 | 0.68 | 1.81E-01 | transcription_start_site | + | 168406 | 168406 | -3477 | 34612 | AN9292 |
| 2291 | CONTIG172 | 164702 | 165155 | 0.68 | 1.81E-01 | transcription_start_site | + | 168959 | 168959 | -4030 | 34613 | AN9292 |
| 2291 | CONTIG172 | 164702 | 165155 | 0.68 | 1.81E-01 | transcription_start_site | + | 170074 | 170074 | -5145 | 34614 | AN9293 |

|      |           |        |        |      |          |                          |   |        |        |       |       |        |
|------|-----------|--------|--------|------|----------|--------------------------|---|--------|--------|-------|-------|--------|
| 222  | CONTIG172 | 176492 | 177066 | 2.78 | 0.00E+00 | transcription_start_site | + | 177680 | 177680 | -901  | 34627 | AN9295 |
| 222  | CONTIG172 | 176492 | 177066 | 2.78 | 0.00E+00 | transcription_start_site | + | 181278 | 181278 | -4499 | 34628 | AN9296 |
| 222  | CONTIG172 | 176492 | 177066 | 2.78 | 0.00E+00 | transcription_start_site | + | 181761 | 181761 | -4982 | 34629 | AN9296 |
| 954  | CONTIG172 | 185193 | 185545 | 1.76 | 3.37E-03 | transcription_start_site | + | 185594 | 185594 | -225  | 34631 | AN9297 |
| 954  | CONTIG172 | 185193 | 185545 | 1.76 | 3.37E-03 | transcription_start_site | + | 186354 | 186354 | -985  | 34632 | AN9297 |
| 954  | CONTIG172 | 185193 | 185545 | 1.76 | 3.37E-03 | transcription_start_site | + | 189431 | 189431 | -4062 | 34633 | AN9298 |
| 954  | CONTIG172 | 185193 | 185545 | 1.76 | 3.37E-03 | transcription_start_site | + | 189556 | 189556 | -4187 | 34634 | AN9298 |
| 954  | CONTIG172 | 185193 | 185545 | 1.76 | 3.37E-03 | transcription_start_site | + | 189999 | 189999 | -4630 | 34635 | AN9298 |
| 1096 | CONTIG172 | 190964 | 191231 | 1.61 | 7.08E-03 | transcription_start_site | + | 189999 | 189999 | 1098  | 34635 | AN9298 |
| 2270 | CONTIG172 | 204605 | 205553 | 0.71 | 1.57E-01 | transcription_start_site | - | 203360 | 203360 | -1719 | 34647 | AN9302 |
| 2270 | CONTIG172 | 204605 | 205553 | 0.71 | 1.57E-01 | transcription_start_site | - | 201765 | 201765 | -3314 | 34648 | AN9302 |
| 2270 | CONTIG172 | 204605 | 205553 | 0.71 | 1.57E-01 | transcription_start_site | - | 201615 | 201615 | -3464 | 34649 | AN9302 |
| 2270 | CONTIG172 | 204605 | 205553 | 0.71 | 1.57E-01 | transcription_start_site | - | 201333 | 201333 | -3746 | 34650 | AN9302 |
| 2270 | CONTIG172 | 204605 | 205553 | 0.71 | 1.57E-01 | transcription_start_site | - | 200876 | 200876 | -4203 | 34651 | AN9302 |
| 2270 | CONTIG172 | 204605 | 205553 | 0.71 | 1.57E-01 | transcription_start_site | - | 205065 | 205065 | -14   | 34652 | AN9303 |
| 2270 | CONTIG172 | 204605 | 205553 | 0.71 | 1.57E-01 | transcription_start_site | - | 204170 | 204170 | -909  | 34653 | AN9303 |
| 2270 | CONTIG172 | 204605 | 205553 | 0.71 | 1.57E-01 | transcription_start_site | + | 207232 | 207232 | -2153 | 34654 | AN9304 |
| 2270 | CONTIG172 | 204605 | 205553 | 0.71 | 1.57E-01 | transcription_start_site | + | 207346 | 207346 | -2267 | 34655 | AN9304 |
| 2228 | CONTIG172 | 213020 | 213381 | 0.77 | 1.76E-01 | transcription_start_site | - | 209800 | 209800 | -3400 | 34656 | AN9305 |
| 2228 | CONTIG172 | 213020 | 213381 | 0.77 | 1.76E-01 | transcription_start_site | - | 209499 | 209499 | -3701 | 34657 | AN9305 |
| 2228 | CONTIG172 | 213020 | 213381 | 0.77 | 1.76E-01 | transcription_start_site | - | 208712 | 208712 | -4488 | 34658 | AN9305 |
| 2270 | CONTIG172 | 204605 | 205553 | 0.71 | 1.57E-01 | transcription_start_site | + | 210454 | 210454 | -5375 | 34659 | AN9306 |
| 2228 | CONTIG172 | 213020 | 213381 | 0.77 | 1.76E-01 | transcription_start_site | + | 212540 | 212540 | 660   | 34664 | AN9307 |
| 2228 | CONTIG172 | 213020 | 213381 | 0.77 | 1.76E-01 | transcription_start_site | + | 212238 | 212238 | 962   | 34663 | AN9307 |
| 2228 | CONTIG172 | 213020 | 213381 | 0.77 | 1.76E-01 | transcription_start_site | + | 213560 | 213560 | -359  | 34665 | AN9308 |
| 2228 | CONTIG172 | 213020 | 213381 | 0.77 | 1.76E-01 | transcription_start_site | + | 213802 | 213802 | -601  | 34666 | AN9308 |
| 2228 | CONTIG172 | 213020 | 213381 | 0.77 | 1.76E-01 | transcription_start_site | + | 215042 | 215042 | -1841 | 34667 | AN9308 |
| 1882 | CONTIG172 | 230938 | 231352 | 1.02 | 6.74E-02 | transcription_start_site | - | 226410 | 226410 | -4735 | 34678 | AN9313 |
| 1882 | CONTIG172 | 230938 | 231352 | 1.02 | 6.74E-02 | transcription_start_site | + | 231276 | 231276 | -131  | 34686 | AN9315 |
| 1882 | CONTIG172 | 230938 | 231352 | 1.02 | 6.74E-02 | transcription_start_site | + | 235988 | 235988 | -4843 | 34692 | AN9317 |
| 1882 | CONTIG172 | 230938 | 231352 | 1.02 | 6.74E-02 | transcription_start_site | + | 236259 | 236259 | -5114 | 34693 | AN9317 |
| 2152 | CONTIG172 | 256368 | 256702 | 0.83 | 1.38E-01 | transcription_start_site | - | 252214 | 252214 | -4321 | 34718 | AN9322 |
| 2152 | CONTIG172 | 256368 | 256702 | 0.83 | 1.38E-01 | transcription_start_site | - | 251888 | 251888 | -4647 | 34719 | AN9322 |
| 2152 | CONTIG172 | 256368 | 256702 | 0.83 | 1.38E-01 | transcription_start_site | - | 256418 | 256418 | -117  | 34720 | AN9323 |
| 2152 | CONTIG172 | 256368 | 256702 | 0.83 | 1.38E-01 | transcription_start_site | - | 255719 | 255719 | -816  | 34721 | AN9323 |
| 2152 | CONTIG172 | 256368 | 256702 | 0.83 | 1.38E-01 | transcription_start_site | - | 254934 | 254934 | -1601 | 34722 | AN9323 |
| 2152 | CONTIG172 | 256368 | 256702 | 0.83 | 1.38E-01 | transcription_start_site | - | 254437 | 254437 | -2098 | 34723 | AN9323 |
| 2152 | CONTIG172 | 256368 | 256702 | 0.83 | 1.38E-01 | transcription_start_site | - | 254262 | 254262 | -2273 | 34724 | AN9323 |
| 2152 | CONTIG172 | 256368 | 256702 | 0.83 | 1.38E-01 | transcription_start_site | - | 253676 | 253676 | -2859 | 34725 | AN9323 |
| 2152 | CONTIG172 | 256368 | 256702 | 0.83 | 1.38E-01 | transcription_start_site | - | 253211 | 253211 | -3324 | 34726 | AN9323 |
| 259  | CONTIG172 | 311794 | 312377 | 2.69 | 0.00E+00 | transcription_start_site | - | 306929 | 306929 | -5156 | 34769 | AN9339 |
| 1831 | CONTIG172 | 308104 | 308528 | 1.05 | 6.04E-02 | transcription_start_site | - | 306929 | 306929 | -1387 | 34769 | AN9339 |
| 1831 | CONTIG172 | 308104 | 308528 | 1.05 | 6.04E-02 | transcription_start_site | - | 306593 | 306593 | -1723 | 34770 | AN9339 |
| 1831 | CONTIG172 | 308104 | 308528 | 1.05 | 6.04E-02 | transcription_start_site | - | 305898 | 305898 | -2418 | 34771 | AN9339 |
| 1831 | CONTIG172 | 308104 | 308528 | 1.05 | 6.04E-02 | transcription_start_site | - | 305676 | 305676 | -2640 | 34772 | AN9339 |
| 1831 | CONTIG172 | 308104 | 308528 | 1.05 | 6.04E-02 | transcription_start_site | - | 305566 | 305566 | -2750 | 34773 | AN9339 |
| 259  | CONTIG172 | 311794 | 312377 | 2.69 | 0.00E+00 | transcription_start_site | - | 311389 | 311389 | -696  | 34774 | AN9340 |
| 259  | CONTIG172 | 311794 | 312377 | 2.69 | 0.00E+00 | transcription_start_site | - | 309750 | 309750 | -2335 | 34775 | AN9340 |
| 259  | CONTIG172 | 311794 | 312377 | 2.69 | 0.00E+00 | transcription_start_site | + | 316901 | 316901 | -4815 | 34776 | AN9341 |
| 259  | CONTIG172 | 311794 | 312377 | 2.69 | 0.00E+00 | transcription_start_site | + | 317112 | 317112 | -5026 | 34777 | AN9341 |
| 1733 | CONTIG172 | 337579 | 338453 | 1.11 | 4.78E-02 | transcription_start_site | - | 337911 | 337911 | -105  | 34790 | AN9344 |
| 1733 | CONTIG172 | 337579 | 338453 | 1.11 | 4.78E-02 | transcription_start_site | - | 337247 | 337247 | -769  | 34791 | AN9344 |
| 1733 | CONTIG172 | 337579 | 338453 | 1.11 | 4.78E-02 | transcription_start_site | - | 336725 | 336725 | -1291 | 34792 | AN9344 |
| 1733 | CONTIG172 | 337579 | 338453 | 1.11 | 4.78E-02 | transcription_start_site | - | 336571 | 336571 | -1445 | 34793 | AN9344 |
| 1733 | CONTIG172 | 337579 | 338453 | 1.11 | 4.78E-02 | transcription_start_site | - | 336017 | 336017 | -1999 | 34794 | AN9344 |
| 1733 | CONTIG172 | 337579 | 338453 | 1.11 | 4.78E-02 | transcription_start_site | - | 334958 | 334958 | -3058 | 34795 | AN9344 |
| 1733 | CONTIG172 | 337579 | 338453 | 1.11 | 4.78E-02 | transcription_start_site | - | 334336 | 334336 | -3680 | 34796 | AN9344 |

|      |           |        |        |      |          |                          |   |        |        |       |       |        |
|------|-----------|--------|--------|------|----------|--------------------------|---|--------|--------|-------|-------|--------|
| 1733 | CONTIG172 | 337579 | 338453 | 1.11 | 4.78E-02 | transcription_start_site | - | 333896 | 333896 | -4120 | 34797 | AN9344 |
| 1733 | CONTIG172 | 337579 | 338453 | 1.11 | 4.78E-02 | transcription_start_site | - | 333653 | 333653 | -4363 | 34798 | AN9344 |
| 1733 | CONTIG172 | 337579 | 338453 | 1.11 | 4.78E-02 | transcription_start_site | - | 333331 | 333331 | -4685 | 34799 | AN9344 |
| 1733 | CONTIG172 | 337579 | 338453 | 1.11 | 4.78E-02 | transcription_start_site | - | 339170 | 339170 | 1154  | 34802 | AN9345 |
| 1733 | CONTIG172 | 337579 | 338453 | 1.11 | 4.78E-02 | transcription_start_site | - | 339271 | 339271 | 1255  | 34801 | AN9345 |
| 1785 | CONTIG172 | 343354 | 343713 | 1.08 | 5.36E-02 | transcription_start_site | - | 340604 | 340604 | -2929 | 34800 | AN9345 |
| 1785 | CONTIG172 | 343354 | 343713 | 1.08 | 5.36E-02 | transcription_start_site | - | 339271 | 339271 | -4262 | 34801 | AN9345 |
| 1785 | CONTIG172 | 343354 | 343713 | 1.08 | 5.36E-02 | transcription_start_site | - | 339170 | 339170 | -4363 | 34802 | AN9345 |
| 1733 | CONTIG172 | 337579 | 338453 | 1.11 | 4.78E-02 | transcription_start_site | + | 341043 | 341043 | -3027 | 34803 | AN9346 |
| 1733 | CONTIG172 | 337579 | 338453 | 1.11 | 4.78E-02 | transcription_start_site | + | 341427 | 341427 | -3411 | 34804 | AN9346 |
| 1733 | CONTIG172 | 337579 | 338453 | 1.11 | 4.78E-02 | transcription_start_site | + | 341787 | 341787 | -3771 | 34805 | AN9346 |
| 1733 | CONTIG172 | 337579 | 338453 | 1.11 | 4.78E-02 | transcription_start_site | + | 341951 | 341951 | -3935 | 34806 | AN9346 |
| 1733 | CONTIG172 | 337579 | 338453 | 1.11 | 4.78E-02 | transcription_start_site | + | 342441 | 342441 | -4425 | 34807 | AN9346 |
| 1785 | CONTIG172 | 343354 | 343713 | 1.08 | 5.36E-02 | transcription_start_site | + | 342441 | 342441 | 1092  | 34807 | AN9346 |
| 1785 | CONTIG172 | 343354 | 343713 | 1.08 | 5.36E-02 | transcription_start_site | + | 343694 | 343694 | -160  | 34808 | AN9347 |
| 1785 | CONTIG172 | 343354 | 343713 | 1.08 | 5.36E-02 | transcription_start_site | + | 344029 | 344029 | -495  | 34809 | AN9347 |
| 1832 | CONTIG172 | 403276 | 403850 | 1.05 | 6.04E-02 | transcription_start_site | + | 403439 | 403439 | 124   | 34876 | AN9370 |
| 1832 | CONTIG172 | 403276 | 403850 | 1.05 | 6.04E-02 | transcription_start_site | + | 403003 | 403003 | 560   | 34875 | AN9370 |
| 317  | CONTIG172 | 427144 | 427408 | 2.59 | 0.00E+00 | transcription_start_site | + | 428573 | 428573 | -1297 | 34886 | AN9377 |
| 2190 | CONTIG172 | 428404 | 429053 | 0.8  | 9.90E-02 | transcription_start_site | + | 428573 | 428573 | 155   | 34886 | AN9377 |
| 317  | CONTIG172 | 427144 | 427408 | 2.59 | 0.00E+00 | transcription_start_site | + | 430158 | 430158 | -2882 | 34887 | AN9378 |
| 317  | CONTIG172 | 427144 | 427408 | 2.59 | 0.00E+00 | transcription_start_site | + | 430500 | 430500 | -3224 | 34888 | AN9378 |
| 317  | CONTIG172 | 427144 | 427408 | 2.59 | 0.00E+00 | transcription_start_site | + | 430741 | 430741 | -3465 | 34889 | AN9378 |
| 2190 | CONTIG172 | 428404 | 429053 | 0.8  | 9.90E-02 | transcription_start_site | + | 430158 | 430158 | -1429 | 34887 | AN9378 |
| 2190 | CONTIG172 | 428404 | 429053 | 0.8  | 9.90E-02 | transcription_start_site | + | 430500 | 430500 | -1771 | 34888 | AN9378 |
| 2190 | CONTIG172 | 428404 | 429053 | 0.8  | 9.90E-02 | transcription_start_site | + | 430741 | 430741 | -2012 | 34889 | AN9378 |
| 2190 | CONTIG172 | 428404 | 429053 | 0.8  | 9.90E-02 | transcription_start_site | + | 433471 | 433471 | -4742 | 34890 | AN9379 |
| 2190 | CONTIG172 | 428404 | 429053 | 0.8  | 9.90E-02 | transcription_start_site | + | 433883 | 433883 | -5154 | 34891 | AN9379 |
| 2190 | CONTIG172 | 428404 | 429053 | 0.8  | 9.90E-02 | transcription_start_site | + | 434020 | 434020 | -5291 | 34892 | AN9379 |
| 1019 | CONTIG172 | 447840 | 448115 | 1.7  | 4.57E-03 | transcription_start_site | - | 445538 | 445538 | -2439 | 34905 | AN9383 |
| 1019 | CONTIG172 | 447840 | 448115 | 1.7  | 4.57E-03 | transcription_start_site | - | 444872 | 444872 | -3105 | 34906 | AN9383 |
| 1019 | CONTIG172 | 447840 | 448115 | 1.7  | 4.57E-03 | transcription_start_site | - | 444396 | 444396 | -3581 | 34907 | AN9383 |
| 1019 | CONTIG172 | 447840 | 448115 | 1.7  | 4.57E-03 | transcription_start_site | - | 447519 | 447519 | -458  | 34908 | AN9384 |
| 1019 | CONTIG172 | 447840 | 448115 | 1.7  | 4.57E-03 | transcription_start_site | - | 446347 | 446347 | -1630 | 34909 | AN9384 |
| 278  | CONTIG172 | 457361 | 457630 | 2.66 | 0.00E+00 | transcription_start_site | + | 458527 | 458527 | -1031 | 34913 | AN9386 |
| 278  | CONTIG172 | 457361 | 457630 | 2.66 | 0.00E+00 | transcription_start_site | + | 458821 | 458821 | -1325 | 34914 | AN9386 |
| 278  | CONTIG172 | 457361 | 457630 | 2.66 | 0.00E+00 | transcription_start_site | + | 459381 | 459381 | -1885 | 34915 | AN9386 |
| 278  | CONTIG172 | 457361 | 457630 | 2.66 | 0.00E+00 | transcription_start_site | + | 459731 | 459731 | -2235 | 34916 | AN9386 |
| 1044 | CONTIG172 | 459531 | 459805 | 1.67 | 5.08E-03 | transcription_start_site | + | 459731 | 459731 | -63   | 34916 | AN9386 |
| 1044 | CONTIG172 | 459531 | 459805 | 1.67 | 5.08E-03 | transcription_start_site | + | 459381 | 459381 | 287   | 34915 | AN9386 |
| 1044 | CONTIG172 | 459531 | 459805 | 1.67 | 5.08E-03 | transcription_start_site | + | 458821 | 458821 | 847   | 34914 | AN9386 |
| 1734 | CONTIG172 | 456321 | 456960 | 1.11 | 4.78E-02 | transcription_start_site | + | 458527 | 458527 | -1886 | 34913 | AN9386 |
| 1734 | CONTIG172 | 456321 | 456960 | 1.11 | 4.78E-02 | transcription_start_site | + | 458821 | 458821 | -2180 | 34914 | AN9386 |
| 1734 | CONTIG172 | 456321 | 456960 | 1.11 | 4.78E-02 | transcription_start_site | + | 459381 | 459381 | -2740 | 34915 | AN9386 |
| 1734 | CONTIG172 | 456321 | 456960 | 1.11 | 4.78E-02 | transcription_start_site | + | 459731 | 459731 | -3090 | 34916 | AN9386 |
| 2153 | CONTIG172 | 458551 | 459125 | 0.83 | 1.38E-01 | transcription_start_site | + | 458821 | 458821 | 17    | 34914 | AN9386 |
| 2153 | CONTIG172 | 458551 | 459125 | 0.83 | 1.38E-01 | transcription_start_site | + | 458527 | 458527 | 311   | 34913 | AN9386 |
| 2153 | CONTIG172 | 458551 | 459125 | 0.83 | 1.38E-01 | transcription_start_site | + | 459381 | 459381 | -543  | 34915 | AN9386 |
| 2153 | CONTIG172 | 458551 | 459125 | 0.83 | 1.38E-01 | transcription_start_site | + | 459731 | 459731 | -893  | 34916 | AN9386 |
| 1044 | CONTIG172 | 459531 | 459805 | 1.67 | 5.08E-03 | transcription_start_site | - | 460734 | 460734 | 1066  | 34920 | AN9387 |
| 1044 | CONTIG172 | 459531 | 459805 | 1.67 | 5.08E-03 | transcription_start_site | + | 462637 | 462637 | -2969 | 34921 | AN9388 |
| 1044 | CONTIG172 | 459531 | 459805 | 1.67 | 5.08E-03 | transcription_start_site | + | 462794 | 462794 | -3126 | 34922 | AN9388 |
| 1044 | CONTIG172 | 459531 | 459805 | 1.67 | 5.08E-03 | transcription_start_site | + | 463013 | 463013 | -3345 | 34923 | AN9388 |
| 1044 | CONTIG172 | 459531 | 459805 | 1.67 | 5.08E-03 | transcription_start_site | + | 463161 | 463161 | -3493 | 34924 | AN9388 |
| 2153 | CONTIG172 | 458551 | 459125 | 0.83 | 1.38E-01 | transcription_start_site | + | 462637 | 462637 | -3799 | 34921 | AN9388 |
| 2153 | CONTIG172 | 458551 | 459125 | 0.83 | 1.38E-01 | transcription_start_site | + | 462794 | 462794 | -3956 | 34922 | AN9388 |
| 2153 | CONTIG172 | 458551 | 459125 | 0.83 | 1.38E-01 | transcription_start_site | + | 463013 | 463013 | -4175 | 34923 | AN9388 |



|      |           |        |        |      |          |                          |   |        |        |       |       |        |
|------|-----------|--------|--------|------|----------|--------------------------|---|--------|--------|-------|-------|--------|
| 2153 | CONTIG172 | 458551 | 459125 | 0.83 | 1.38E-01 | transcription_start_site | + | 463161 | 463161 | -4323 | 34924 | AN9388 |
| 1214 | CONTIG172 | 474765 | 475051 | 1.51 | 9.96E-03 | transcription_start_site | - | 474751 | 474751 | -157  | 34933 | AN9391 |
| 1214 | CONTIG172 | 474765 | 475051 | 1.51 | 9.96E-03 | transcription_start_site | + | 475104 | 475104 | -196  | 34934 | AN9392 |
| 1214 | CONTIG172 | 474765 | 475051 | 1.51 | 9.96E-03 | transcription_start_site | + | 475381 | 475381 | -473  | 34935 | AN9392 |
| 1214 | CONTIG172 | 474765 | 475051 | 1.51 | 9.96E-03 | transcription_start_site | + | 475849 | 475849 | -941  | 34936 | AN9392 |
| 1214 | CONTIG172 | 474765 | 475051 | 1.51 | 9.96E-03 | transcription_start_site | + | 476055 | 476055 | -1147 | 34937 | AN9392 |
| 1214 | CONTIG172 | 474765 | 475051 | 1.51 | 9.96E-03 | transcription_start_site | + | 476277 | 476277 | -1369 | 34938 | AN9392 |
| 1214 | CONTIG172 | 474765 | 475051 | 1.51 | 9.96E-03 | transcription_start_site | + | 476426 | 476426 | -1518 | 34939 | AN9392 |
| 1214 | CONTIG172 | 474765 | 475051 | 1.51 | 9.96E-03 | transcription_start_site | + | 476561 | 476561 | -1653 | 34940 | AN9392 |
| 1214 | CONTIG172 | 474765 | 475051 | 1.51 | 9.96E-03 | transcription_start_site | + | 476738 | 476738 | -1830 | 34941 | AN9392 |
| 1214 | CONTIG172 | 474765 | 475051 | 1.51 | 9.96E-03 | transcription_start_site | + | 476924 | 476924 | -2016 | 34942 | AN9392 |
| 1214 | CONTIG172 | 474765 | 475051 | 1.51 | 9.96E-03 | transcription_start_site | + | 477061 | 477061 | -2153 | 34943 | AN9392 |
| 1214 | CONTIG172 | 474765 | 475051 | 1.51 | 9.96E-03 | transcription_start_site | + | 477402 | 477402 | -2494 | 34944 | AN9392 |
| 1214 | CONTIG172 | 474765 | 475051 | 1.51 | 9.96E-03 | transcription_start_site | + | 477535 | 477535 | -2627 | 34945 | AN9392 |
| 1214 | CONTIG172 | 474765 | 475051 | 1.51 | 9.96E-03 | transcription_start_site | + | 478157 | 478157 | -3249 | 34946 | AN9393 |
| 1214 | CONTIG172 | 474765 | 475051 | 1.51 | 9.96E-03 | transcription_start_site | + | 478619 | 478619 | -3711 | 34947 | AN9393 |
| 1214 | CONTIG172 | 474765 | 475051 | 1.51 | 9.96E-03 | transcription_start_site | + | 479169 | 479169 | -4261 | 34948 | AN9393 |
| 2154 | CONTIG172 | 486077 | 487341 | 0.83 | 1.38E-01 | transcription_start_site | - | 481713 | 481713 | -4996 | 34949 | AN9394 |
| 2154 | CONTIG172 | 486077 | 487341 | 0.83 | 1.38E-01 | transcription_start_site | - | 481371 | 481371 | -5338 | 34950 | AN9394 |
| 2154 | CONTIG172 | 486077 | 487341 | 0.83 | 1.38E-01 | transcription_start_site | - | 481130 | 481130 | -5579 | 34951 | AN9394 |
| 1020 | CONTIG172 | 488852 | 489301 | 1.7  | 4.57E-03 | transcription_start_site | - | 484744 | 484744 | -4332 | 34957 | AN9395 |
| 1020 | CONTIG172 | 488852 | 489301 | 1.7  | 4.57E-03 | transcription_start_site | - | 484501 | 484501 | -4575 | 34958 | AN9395 |
| 1020 | CONTIG172 | 488852 | 489301 | 1.7  | 4.57E-03 | transcription_start_site | - | 483947 | 483947 | -5129 | 34959 | AN9395 |
| 1097 | CONTIG172 | 488182 | 488767 | 1.61 | 7.08E-03 | transcription_start_site | - | 484744 | 484744 | -3730 | 34957 | AN9395 |
| 1097 | CONTIG172 | 488182 | 488767 | 1.61 | 7.08E-03 | transcription_start_site | - | 484501 | 484501 | -3973 | 34958 | AN9395 |
| 1097 | CONTIG172 | 488182 | 488767 | 1.61 | 7.08E-03 | transcription_start_site | - | 483947 | 483947 | -4527 | 34959 | AN9395 |
| 1097 | CONTIG172 | 488182 | 488767 | 1.61 | 7.08E-03 | transcription_start_site | - | 483368 | 483368 | -5106 | 34960 | AN9395 |
| 2154 | CONTIG172 | 486077 | 487341 | 0.83 | 1.38E-01 | transcription_start_site | - | 484744 | 484744 | -1965 | 34957 | AN9395 |
| 2154 | CONTIG172 | 486077 | 487341 | 0.83 | 1.38E-01 | transcription_start_site | - | 484501 | 484501 | -2208 | 34958 | AN9395 |
| 2154 | CONTIG172 | 486077 | 487341 | 0.83 | 1.38E-01 | transcription_start_site | - | 483947 | 483947 | -2762 | 34959 | AN9395 |
| 2154 | CONTIG172 | 486077 | 487341 | 0.83 | 1.38E-01 | transcription_start_site | - | 483368 | 483368 | -3341 | 34960 | AN9395 |
| 2154 | CONTIG172 | 486077 | 487341 | 0.83 | 1.38E-01 | transcription_start_site | - | 483045 | 483045 | -3664 | 34961 | AN9395 |
| 1020 | CONTIG172 | 488852 | 489301 | 1.7  | 4.57E-03 | transcription_start_site | - | 486144 | 486144 | -2932 | 34962 | AN9396 |
| 1020 | CONTIG172 | 488852 | 489301 | 1.7  | 4.57E-03 | transcription_start_site | - | 486000 | 486000 | -3076 | 34963 | AN9396 |
| 1097 | CONTIG172 | 488182 | 488767 | 1.61 | 7.08E-03 | transcription_start_site | - | 486144 | 486144 | -2330 | 34962 | AN9396 |
| 1097 | CONTIG172 | 488182 | 488767 | 1.61 | 7.08E-03 | transcription_start_site | - | 486000 | 486000 | -2474 | 34963 | AN9396 |
| 2154 | CONTIG172 | 486077 | 487341 | 0.83 | 1.38E-01 | transcription_start_site | - | 486144 | 486144 | -565  | 34962 | AN9396 |
| 2154 | CONTIG172 | 486077 | 487341 | 0.83 | 1.38E-01 | transcription_start_site | - | 486000 | 486000 | -709  | 34963 | AN9396 |
| 1020 | CONTIG172 | 488852 | 489301 | 1.7  | 4.57E-03 | transcription_start_site | - | 487968 | 487968 | -1108 | 34964 | AN9397 |
| 1020 | CONTIG172 | 488852 | 489301 | 1.7  | 4.57E-03 | transcription_start_site | - | 487686 | 487686 | -1390 | 34965 | AN9397 |
| 1097 | CONTIG172 | 488182 | 488767 | 1.61 | 7.08E-03 | transcription_start_site | - | 487968 | 487968 | -506  | 34964 | AN9397 |
| 1097 | CONTIG172 | 488182 | 488767 | 1.61 | 7.08E-03 | transcription_start_site | - | 487686 | 487686 | -788  | 34965 | AN9397 |
| 2154 | CONTIG172 | 486077 | 487341 | 0.83 | 1.38E-01 | transcription_start_site | - | 487686 | 487686 | 977   | 34965 | AN9397 |
| 2154 | CONTIG172 | 486077 | 487341 | 0.83 | 1.38E-01 | transcription_start_site | - | 487968 | 487968 | 1259  | 34964 | AN9397 |
| 1020 | CONTIG172 | 488852 | 489301 | 1.7  | 4.57E-03 | transcription_start_site | + | 491858 | 491858 | -2781 | 34969 | AN9399 |
| 1097 | CONTIG172 | 488182 | 488767 | 1.61 | 7.08E-03 | transcription_start_site | + | 491858 | 491858 | -3383 | 34969 | AN9399 |
| 2154 | CONTIG172 | 486077 | 487341 | 0.83 | 1.38E-01 | transcription_start_site | + | 491858 | 491858 | -5149 | 34969 | AN9399 |
| 674  | CONTIG172 | 514370 | 514629 | 2.07 | 2.06E-04 | transcription_start_site | - | 513591 | 513591 | -908  | 34991 | AN9407 |
| 674  | CONTIG172 | 514370 | 514629 | 2.07 | 2.06E-04 | transcription_start_site | - | 512999 | 512999 | -1500 | 34992 | AN9407 |
| 674  | CONTIG172 | 514370 | 514629 | 2.07 | 2.06E-04 | transcription_start_site | + | 515196 | 515196 | -696  | 34994 | AN9408 |
| 2327 | CONTIG174 | 8478   | 10257  | 0.62 | 3.02E-02 | transcription_start_site | - | 4474   | 4474   | -4893 | 35009 | AN9412 |
| 2327 | CONTIG174 | 8478   | 10257  | 0.62 | 3.02E-02 | transcription_start_site | - | 4263   | 4263   | -5104 | 35010 | AN9412 |
| 2327 | CONTIG174 | 8478   | 10257  | 0.62 | 3.02E-02 | transcription_start_site | - | 3987   | 3987   | -5380 | 35011 | AN9412 |
| 2327 | CONTIG174 | 8478   | 10257  | 0.62 | 3.02E-02 | transcription_start_site | - | 3626   | 3626   | -5741 | 35012 | AN9412 |
| 2327 | CONTIG174 | 8478   | 10257  | 0.62 | 3.02E-02 | transcription_start_site | + | 8516   | 8516   | 851   | 35014 | AN9413 |
| 2327 | CONTIG174 | 8478   | 10257  | 0.62 | 3.02E-02 | transcription_start_site | + | 11799  | 11799  | -2431 | 35015 | AN9414 |
| 2361 | CONTIG174 | 16521  | 17620  | 0.49 | 8.54E-02 | transcription_start_site | + | 21536  | 21536  | -4465 | 35016 | AN9416 |

|      |           |       |       |      |          |                          |   |       |       |       |       |        |
|------|-----------|-------|-------|------|----------|--------------------------|---|-------|-------|-------|-------|--------|
| 2361 | CONTIG174 | 16521 | 17620 | 0.49 | 8.54E-02 | transcription_start_site | + | 21917 | 21917 | -4846 | 35017 | AN9416 |
| 2361 | CONTIG174 | 16521 | 17620 | 0.49 | 8.54E-02 | transcription_start_site | + | 22035 | 22035 | -4964 | 35018 | AN9416 |
| 2367 | CONTIG174 | 23554 | 24282 | 0.45 | 1.15E-01 | transcription_start_site | - | 23593 | 23593 | -325  | 35019 | AN9417 |
| 2367 | CONTIG174 | 23554 | 24282 | 0.45 | 1.15E-01 | transcription_start_site | - | 23432 | 23432 | -486  | 35020 | AN9417 |
| 1550 | CONTIG175 | 9616  | 9880  | 1.23 | 7.70E-03 | transcription_start_site | - | 5186  | 5186  | -4562 | 35021 | AN9418 |
| 1550 | CONTIG175 | 9616  | 9880  | 1.23 | 7.70E-03 | transcription_start_site | - | 4884  | 4884  | -4864 | 35022 | AN9418 |
| 1550 | CONTIG175 | 9616  | 9880  | 1.23 | 7.70E-03 | transcription_start_site | - | 9562  | 9562  | -186  | 35029 | AN9420 |
| 1550 | CONTIG175 | 9616  | 9880  | 1.23 | 7.70E-03 | transcription_start_site | - | 9316  | 9316  | -432  | 35030 | AN9420 |
| 1550 | CONTIG175 | 9616  | 9880  | 1.23 | 7.70E-03 | transcription_start_site | - | 9114  | 9114  | -634  | 35031 | AN9420 |
| 1550 | CONTIG175 | 9616  | 9880  | 1.23 | 7.70E-03 | transcription_start_site | + | 10192 | 10192 | -444  | 35032 | AN9421 |
| 1550 | CONTIG175 | 9616  | 9880  | 1.23 | 7.70E-03 | transcription_start_site | + | 10382 | 10382 | -634  | 35033 | AN9421 |
| 2274 | CONTIG175 | 18153 | 18502 | 0.7  | 6.50E-02 | transcription_start_site | - | 13442 | 13442 | -4885 | 35034 | AN9422 |
| 2339 | CONTIG175 | 15381 | 15803 | 0.6  | 1.76E-01 | transcription_start_site | - | 13442 | 13442 | -2150 | 35034 | AN9422 |
| 2339 | CONTIG175 | 15381 | 15803 | 0.6  | 1.76E-01 | transcription_start_site | - | 13059 | 13059 | -2533 | 35035 | AN9422 |
| 2339 | CONTIG175 | 15381 | 15803 | 0.6  | 1.76E-01 | transcription_start_site | - | 12830 | 12830 | -2762 | 35036 | AN9422 |
| 2339 | CONTIG175 | 15381 | 15803 | 0.6  | 1.76E-01 | transcription_start_site | - | 12632 | 12632 | -2960 | 35037 | AN9422 |
| 1550 | CONTIG175 | 9616  | 9880  | 1.23 | 7.70E-03 | transcription_start_site | + | 13939 | 13939 | -4191 | 35038 | AN9423 |
| 1550 | CONTIG175 | 9616  | 9880  | 1.23 | 7.70E-03 | transcription_start_site | + | 14117 | 14117 | -4369 | 35039 | AN9423 |
| 1550 | CONTIG175 | 9616  | 9880  | 1.23 | 7.70E-03 | transcription_start_site | + | 14805 | 14805 | -5057 | 35040 | AN9423 |
| 2339 | CONTIG175 | 15381 | 15803 | 0.6  | 1.76E-01 | transcription_start_site | + | 14805 | 14805 | 787   | 35040 | AN9423 |
| 2274 | CONTIG175 | 18153 | 18502 | 0.7  | 6.50E-02 | transcription_start_site | - | 17289 | 17289 | -1038 | 35041 | AN9424 |
| 2274 | CONTIG175 | 18153 | 18502 | 0.7  | 6.50E-02 | transcription_start_site | - | 17140 | 17140 | -1187 | 35042 | AN9424 |
| 2274 | CONTIG175 | 18153 | 18502 | 0.7  | 6.50E-02 | transcription_start_site | - | 16948 | 16948 | -1379 | 35043 | AN9424 |
| 2274 | CONTIG175 | 18153 | 18502 | 0.7  | 6.50E-02 | transcription_start_site | - | 16765 | 16765 | -1562 | 35044 | AN9424 |
| 2339 | CONTIG175 | 15381 | 15803 | 0.6  | 1.76E-01 | transcription_start_site | - | 16765 | 16765 | 1173  | 35044 | AN9424 |
| 2355 | CONTIG176 | 2791  | 3290  | 0.51 | 1.38E-01 | transcription_start_site | + | 3202  | 3202  | -161  | 35045 | AN9425 |
| 2355 | CONTIG176 | 2791  | 3290  | 0.51 | 1.38E-01 | transcription_start_site | + | 3349  | 3349  | -308  | 35046 | AN9425 |
| 2355 | CONTIG176 | 2791  | 3290  | 0.51 | 1.38E-01 | transcription_start_site | + | 3536  | 3536  | -495  | 35047 | AN9425 |
| 2355 | CONTIG176 | 2791  | 3290  | 0.51 | 1.38E-01 | transcription_start_site | + | 3719  | 3719  | -678  | 35048 | AN9425 |
| 2355 | CONTIG176 | 2791  | 3290  | 0.51 | 1.38E-01 | transcription_start_site | + | 4000  | 4000  | -959  | 35049 | AN9425 |
| 2355 | CONTIG176 | 2791  | 3290  | 0.51 | 1.38E-01 | transcription_start_site | + | 4170  | 4170  | -1129 | 35050 | AN9425 |
| 2375 | CONTIG178 | 8332  | 9294  | 0.4  | 1.96E-01 | transcription_start_site | - | 7854  | 7854  | -959  | 35082 | AN9432 |
| 2375 | CONTIG178 | 8332  | 9294  | 0.4  | 1.96E-01 | transcription_start_site | - | 7704  | 7704  | -1109 | 35083 | AN9432 |
| 2375 | CONTIG178 | 8332  | 9294  | 0.4  | 1.96E-01 | transcription_start_site | - | 7582  | 7582  | -1231 | 35084 | AN9432 |
| 2375 | CONTIG178 | 8332  | 9294  | 0.4  | 1.96E-01 | transcription_start_site | - | 7402  | 7402  | -1411 | 35085 | AN9432 |
| 2375 | CONTIG178 | 8332  | 9294  | 0.4  | 1.96E-01 | transcription_start_site | - | 7295  | 7295  | -1518 | 35086 | AN9432 |
| 2375 | CONTIG178 | 8332  | 9294  | 0.4  | 1.96E-01 | transcription_start_site | - | 7197  | 7197  | -1616 | 35087 | AN9432 |
| 2375 | CONTIG178 | 8332  | 9294  | 0.4  | 1.96E-01 | transcription_start_site | - | 7102  | 7102  | -1711 | 35088 | AN9432 |
| 2375 | CONTIG178 | 8332  | 9294  | 0.4  | 1.96E-01 | transcription_start_site | - | 6949  | 6949  | -1864 | 35089 | AN9432 |
| 2375 | CONTIG178 | 8332  | 9294  | 0.4  | 1.96E-01 | transcription_start_site | - | 6821  | 6821  | -1992 | 35090 | AN9432 |
| 2375 | CONTIG178 | 8332  | 9294  | 0.4  | 1.96E-01 | transcription_start_site | - | 6577  | 6577  | -2236 | 35091 | AN9432 |
| 2375 | CONTIG178 | 8332  | 9294  | 0.4  | 1.96E-01 | transcription_start_site | - | 6488  | 6488  | -2325 | 35092 | AN9432 |
| 2375 | CONTIG178 | 8332  | 9294  | 0.4  | 1.96E-01 | transcription_start_site | - | 6355  | 6355  | -2458 | 35093 | AN9432 |
| 2375 | CONTIG178 | 8332  | 9294  | 0.4  | 1.96E-01 | transcription_start_site | - | 6242  | 6242  | -2571 | 35094 | AN9432 |
| 2373 | CONTIG180 | 9916  | 10420 | 0.41 | 1.76E-01 | transcription_start_site | + | 9955  | 9955  | 213   | 35118 | AN9438 |
| 2373 | CONTIG180 | 9916  | 10420 | 0.41 | 1.76E-01 | transcription_start_site | + | 9626  | 9626  | 542   | 35117 | AN9438 |
| 220  | CONTIG186 | 2026  | 2315  | 2.79 | 1.25E-02 | transcription_start_site | + | 3116  | 3116  | -945  | 35150 | AN9448 |
| 220  | CONTIG186 | 2026  | 2315  | 2.79 | 1.25E-02 | transcription_start_site | + | 3348  | 3348  | -1177 | 35151 | AN9448 |
| 465  | CONTIG187 | 6992  | 7416  | 2.37 | 3.01E-02 | transcription_start_site | - | 5371  | 5371  | -1833 | 35156 | AN9451 |
| 842  | CONTIG187 | 7742  | 8381  | 1.89 | 7.66E-02 | transcription_start_site | - | 5371  | 5371  | -2690 | 35156 | AN9451 |
| 1826 | CONTIG188 | 8855  | 10044 | 1.05 | 2.05E-02 | transcription_start_site | - | 9966  | 9966  | 516   | 35157 | AN9455 |
| 1190 | CONTIG189 | 4951  | 5305  | 1.53 | 1.06E-02 | transcription_start_site | - | 2224  | 2224  | -2904 | 35158 | AN9456 |
| 1190 | CONTIG189 | 4951  | 5305  | 1.53 | 1.06E-02 | transcription_start_site | - | 2039  | 2039  | -3089 | 35159 | AN9456 |
| 1190 | CONTIG189 | 4951  | 5305  | 1.53 | 1.06E-02 | transcription_start_site | - | 1760  | 1760  | -3368 | 35160 | AN9456 |
| 1190 | CONTIG189 | 4951  | 5305  | 1.53 | 1.06E-02 | transcription_start_site | - | 1445  | 1445  | -3683 | 35161 | AN9456 |
| 1190 | CONTIG189 | 4951  | 5305  | 1.53 | 1.06E-02 | transcription_start_site | - | 1104  | 1104  | -4024 | 35162 | AN9456 |
| 1190 | CONTIG189 | 4951  | 5305  | 1.53 | 1.06E-02 | transcription_start_site | - | 710   | 710   | -4418 | 35163 | AN9456 |

|      |           |      |      |      |          |                          |   |      |      |       |       |        |
|------|-----------|------|------|------|----------|--------------------------|---|------|------|-------|-------|--------|
| 1190 | CONTIG189 | 4951 | 5305 | 1.53 | 1.06E-02 | transcription_start_site | + | 5280 | 5280 | -152  | 35165 | AN9457 |
| 1190 | CONTIG189 | 4951 | 5305 | 1.53 | 1.06E-02 | transcription_start_site | + | 4000 | 4000 | 1128  | 35164 | AN9457 |
| 1190 | CONTIG189 | 4951 | 5305 | 1.53 | 1.06E-02 | transcription_start_site | + | 6669 | 6669 | -1541 | 35166 | AN9458 |
| 1190 | CONTIG189 | 4951 | 5305 | 1.53 | 1.06E-02 | transcription_start_site | + | 6885 | 6885 | -1757 | 35167 | AN9458 |
| 1190 | CONTIG189 | 4951 | 5305 | 1.53 | 1.06E-02 | transcription_start_site | + | 7855 | 7855 | -2727 | 35168 | AN9458 |
| 1190 | CONTIG189 | 4951 | 5305 | 1.53 | 1.06E-02 | transcription_start_site | + | 8985 | 8985 | -3857 | 35169 | AN9458 |
| 623  | CONTIG190 | 7657 | 8226 | 2.16 | 7.36E-03 | transcription_start_site | - | 3299 | 3299 | -4642 | 35170 | AN9459 |
| 623  | CONTIG190 | 7657 | 8226 | 2.16 | 7.36E-03 | transcription_start_site | - | 7449 | 7449 | -492  | 35176 | AN9461 |
| 623  | CONTIG190 | 7657 | 8226 | 2.16 | 7.36E-03 | transcription_start_site | - | 7269 | 7269 | -672  | 35177 | AN9461 |
| 623  | CONTIG190 | 7657 | 8226 | 2.16 | 7.36E-03 | transcription_start_site | - | 7099 | 7099 | -842  | 35178 | AN9461 |
| 623  | CONTIG190 | 7657 | 8226 | 2.16 | 7.36E-03 | transcription_start_site | - | 6769 | 6769 | -1172 | 35179 | AN9461 |
| 2180 | CONTIG191 | 1071 | 1417 | 0.81 | 6.04E-02 | transcription_start_site | - | 2266 | 2266 | 1022  | 35181 | AN9462 |
| 2180 | CONTIG191 | 1071 | 1417 | 0.81 | 6.04E-02 | transcription_start_site | + | 3633 | 3633 | -2389 | 35182 | AN9463 |
| 2304 | CONTIG192 | 2871 | 3285 | 0.66 | 6.74E-02 | transcription_start_site | + | 2515 | 2515 | 563   | 35186 | AN9464 |
| 2304 | CONTIG192 | 2871 | 3285 | 0.66 | 6.74E-02 | transcription_start_site | + | 1904 | 1904 | 1174  | 35185 | AN9464 |
| 2304 | CONTIG192 | 2871 | 3285 | 0.66 | 6.74E-02 | transcription_start_site | + | 3196 | 3196 | -118  | 35187 | AN9465 |
| 2304 | CONTIG192 | 2871 | 3285 | 0.66 | 6.74E-02 | transcription_start_site | + | 3448 | 3448 | -370  | 35188 | AN9465 |
| 2304 | CONTIG192 | 2871 | 3285 | 0.66 | 6.74E-02 | transcription_start_site | + | 3599 | 3599 | -521  | 35189 | AN9465 |
| 2304 | CONTIG192 | 2871 | 3285 | 0.66 | 6.74E-02 | transcription_start_site | + | 3995 | 3995 | -917  | 35190 | AN9465 |
| 2304 | CONTIG192 | 2871 | 3285 | 0.66 | 6.74E-02 | transcription_start_site | + | 4222 | 4222 | -1144 | 35191 | AN9465 |
| 2364 | CONTIG192 | 4276 | 4555 | 0.48 | 1.97E-01 | transcription_start_site | + | 4222 | 4222 | 193   | 35191 | AN9465 |
| 2364 | CONTIG192 | 4276 | 4555 | 0.48 | 1.97E-01 | transcription_start_site | + | 3995 | 3995 | 420   | 35190 | AN9465 |
| 2364 | CONTIG192 | 4276 | 4555 | 0.48 | 1.97E-01 | transcription_start_site | + | 3599 | 3599 | 816   | 35189 | AN9465 |
| 2364 | CONTIG192 | 4276 | 4555 | 0.48 | 1.97E-01 | transcription_start_site | + | 3448 | 3448 | 967   | 35188 | AN9465 |
| 2294 | CONTIG193 | 5701 | 6129 | 0.67 | 7.66E-02 | transcription_start_site | + | 5135 | 5135 | 780   | 35202 | AN9467 |
| 2294 | CONTIG193 | 5701 | 6129 | 0.67 | 7.66E-02 | transcription_start_site | + | 4769 | 4769 | 1146  | 35201 | AN9467 |
| 2273 | CONTIG194 | 2106 | 2900 | 0.7  | 1.58E-02 | transcription_start_site | - | 2476 | 2476 | -27   | 35203 | AN9468 |
| 2273 | CONTIG194 | 2106 | 2900 | 0.7  | 1.58E-02 | transcription_start_site | - | 2358 | 2358 | -145  | 35204 | AN9468 |
| 2273 | CONTIG194 | 2106 | 2900 | 0.7  | 1.58E-02 | transcription_start_site | - | 1976 | 1976 | -527  | 35205 | AN9468 |
| 2273 | CONTIG194 | 2106 | 2900 | 0.7  | 1.58E-02 | transcription_start_site | - | 1837 | 1837 | -666  | 35206 | AN9468 |
| 2273 | CONTIG194 | 2106 | 2900 | 0.7  | 1.58E-02 | transcription_start_site | + | 2825 | 2825 | -322  | 35207 | AN9469 |
| 2273 | CONTIG194 | 2106 | 2900 | 0.7  | 1.58E-02 | transcription_start_site | + | 2941 | 2941 | -438  | 35208 | AN9469 |
| 2273 | CONTIG194 | 2106 | 2900 | 0.7  | 1.58E-02 | transcription_start_site | + | 3361 | 3361 | -858  | 35209 | AN9469 |
| 2273 | CONTIG194 | 2106 | 2900 | 0.7  | 1.58E-02 | transcription_start_site | + | 6049 | 6049 | -3546 | 35214 | AN9472 |
| 2273 | CONTIG194 | 2106 | 2900 | 0.7  | 1.58E-02 | transcription_start_site | + | 6193 | 6193 | -3690 | 35215 | AN9472 |
| 2273 | CONTIG194 | 2106 | 2900 | 0.7  | 1.58E-02 | transcription_start_site | + | 6262 | 6262 | -3759 | 35216 | AN9472 |
| 2273 | CONTIG194 | 2106 | 2900 | 0.7  | 1.58E-02 | transcription_start_site | + | 6373 | 6373 | -3870 | 35217 | AN9472 |
| 2273 | CONTIG194 | 2106 | 2900 | 0.7  | 1.58E-02 | transcription_start_site | + | 7157 | 7157 | -4654 | 35218 | AN9472 |
| 2273 | CONTIG194 | 2106 | 2900 | 0.7  | 1.58E-02 | transcription_start_site | + | 7354 | 7354 | -4851 | 35219 | AN9472 |
| 505  | CONTIG195 | 1666 | 2075 | 2.31 | 3.01E-02 | transcription_start_site | + | 3856 | 3856 | -1985 | 35220 | AN9473 |
| 505  | CONTIG195 | 1666 | 2075 | 2.31 | 3.01E-02 | transcription_start_site | + | 6294 | 6294 | -4423 | 35221 | AN9474 |
| 505  | CONTIG195 | 1666 | 2075 | 2.31 | 3.01E-02 | transcription_start_site | + | 6377 | 6377 | -4506 | 35222 | AN9474 |
| 505  | CONTIG195 | 1666 | 2075 | 2.31 | 3.01E-02 | transcription_start_site | + | 6592 | 6592 | -4721 | 35223 | AN9474 |
| 2352 | CONTIG196 | 4891 | 5251 | 0.54 | 1.54E-01 | transcription_start_site | + | 4907 | 4907 | 164   | 35232 | AN9476 |
| 2352 | CONTIG196 | 4891 | 5251 | 0.54 | 1.54E-01 | transcription_start_site | + | 4763 | 4763 | 308   | 35231 | AN9476 |
| 2352 | CONTIG196 | 4891 | 5251 | 0.54 | 1.54E-01 | transcription_start_site | + | 5518 | 5518 | -447  | 35233 | AN9476 |
| 2352 | CONTIG196 | 4891 | 5251 | 0.54 | 1.54E-01 | transcription_start_site | + | 5777 | 5777 | -706  | 35234 | AN9476 |
| 2352 | CONTIG196 | 4891 | 5251 | 0.54 | 1.54E-01 | transcription_start_site | + | 7193 | 7193 | -2122 | 35235 | AN9477 |
| 2352 | CONTIG196 | 4891 | 5251 | 0.54 | 1.54E-01 | transcription_start_site | + | 7329 | 7329 | -2258 | 35236 | AN9477 |
| 2378 | CONTIG198 | 1060 | 1569 | 0.39 | 1.22E-01 | transcription_start_site | + | 1393 | 1393 | -78   | 35240 | AN9480 |
| 2378 | CONTIG198 | 1060 | 1569 | 0.39 | 1.22E-01 | transcription_start_site | + | 1165 | 1165 | 149   | 35239 | AN9480 |
| 2378 | CONTIG198 | 1060 | 1569 | 0.39 | 1.22E-01 | transcription_start_site | + | 1709 | 1709 | -394  | 35241 | AN9480 |
| 2378 | CONTIG198 | 1060 | 1569 | 0.39 | 1.22E-01 | transcription_start_site | + | 527  | 527  | 787   | 35238 | AN9480 |
| 2378 | CONTIG198 | 1060 | 1569 | 0.39 | 1.22E-01 | transcription_start_site | + | 103  | 103  | 1211  | 35237 | AN9480 |
| 2383 | CONTIG201 | 4053 | 5083 | 0.3  | 1.13E-01 | transcription_start_site | + | 4353 | 4353 | 215   | 35256 | AN9486 |
| 693  | CONTIG205 | 4891 | 5226 | 2.06 | 2.29E-02 | transcription_start_site | - | 4462 | 4462 | -596  | 35289 | AN9492 |
| 693  | CONTIG205 | 4891 | 5226 | 2.06 | 2.29E-02 | transcription_start_site | - | 4319 | 4319 | -739  | 35290 | AN9492 |

|      |           |      |      |      |          |                          |   |      |      |       |       |        |
|------|-----------|------|------|------|----------|--------------------------|---|------|------|-------|-------|--------|
| 91   | CONTIG206 | 921  | 1560 | 3.12 | 1.83E-02 | transcription_start_site | + | 6182 | 6182 | -4941 | 35293 | AN9494 |
| 91   | CONTIG206 | 921  | 1560 | 3.12 | 1.83E-02 | transcription_start_site | + | 6382 | 6382 | -5141 | 35294 | AN9494 |
| 2266 | CONTIG209 | 681  | 1036 | 0.71 | 6.74E-02 | transcription_start_site | + | 1087 | 1087 | -228  | 35308 | AN9500 |
| 2266 | CONTIG209 | 681  | 1036 | 0.71 | 6.74E-02 | transcription_start_site | + | 1570 | 1570 | -711  | 35309 | AN9500 |
| 949  | CONTIG215 | 3006 | 3292 | 1.77 | 1.80E-02 | transcription_start_site | - | 2761 | 2761 | -388  | 35325 | AN9506 |
| 949  | CONTIG215 | 3006 | 3292 | 1.77 | 1.80E-02 | transcription_start_site | - | 2615 | 2615 | -534  | 35326 | AN9506 |
| 949  | CONTIG215 | 3006 | 3292 | 1.77 | 1.80E-02 | transcription_start_site | - | 2547 | 2547 | -602  | 35327 | AN9506 |
| 949  | CONTIG215 | 3006 | 3292 | 1.77 | 1.80E-02 | transcription_start_site | - | 2446 | 2446 | -703  | 35328 | AN9506 |
| 949  | CONTIG215 | 3006 | 3292 | 1.77 | 1.80E-02 | transcription_start_site | - | 2324 | 2324 | -825  | 35329 | AN9506 |
| 949  | CONTIG215 | 3006 | 3292 | 1.77 | 1.80E-02 | transcription_start_site | - | 2050 | 2050 | -1099 | 35330 | AN9506 |
| 949  | CONTIG215 | 3006 | 3292 | 1.77 | 1.80E-02 | transcription_start_site | - | 1880 | 1880 | -1269 | 35331 | AN9506 |
| 949  | CONTIG215 | 3006 | 3292 | 1.77 | 1.80E-02 | transcription_start_site | - | 1305 | 1305 | -1844 | 35332 | AN9506 |
| 1380 | CONTIG215 | 766  | 1030 | 1.37 | 6.04E-02 | transcription_start_site | - | 1305 | 1305 | 407   | 35332 | AN9506 |
| 1380 | CONTIG215 | 766  | 1030 | 1.37 | 6.04E-02 | transcription_start_site | - | 1880 | 1880 | 982   | 35331 | AN9506 |
| 431  | CONTIG220 | 2481 | 2835 | 2.42 | 1.54E-02 | transcription_start_site | + | 4698 | 4698 | -2040 | 35352 | AN9510 |
| 431  | CONTIG220 | 2481 | 2835 | 2.42 | 1.54E-02 | transcription_start_site | + | 5547 | 5547 | -2889 | 35353 | AN9510 |
| 2159 | CONTIG221 | 5176 | 5545 | 0.82 | 5.36E-02 | transcription_start_site | - | 2240 | 2240 | -3120 | 35354 | AN9511 |
| 2159 | CONTIG221 | 5176 | 5545 | 0.82 | 5.36E-02 | transcription_start_site | - | 1935 | 1935 | -3425 | 35355 | AN9511 |
| 2159 | CONTIG221 | 5176 | 5545 | 0.82 | 5.36E-02 | transcription_start_site | - | 1572 | 1572 | -3788 | 35356 | AN9511 |
| 2159 | CONTIG221 | 5176 | 5545 | 0.82 | 5.36E-02 | transcription_start_site | - | 4680 | 4680 | -680  | 35357 | AN9512 |
| 2159 | CONTIG221 | 5176 | 5545 | 0.82 | 5.36E-02 | transcription_start_site | - | 4607 | 4607 | -753  | 35358 | AN9512 |
| 2159 | CONTIG221 | 5176 | 5545 | 0.82 | 5.36E-02 | transcription_start_site | - | 4463 | 4463 | -897  | 35359 | AN9512 |
| 2342 | CONTIG223 | 4276 | 4775 | 0.59 | 8.54E-02 | transcription_start_site | + | 4311 | 4311 | 214   | 35361 | AN9514 |
| 1731 | CONTIG224 | 4671 | 5011 | 1.11 | 3.70E-02 | transcription_start_site | - | 4733 | 4733 | -108  | 35363 | AN9515 |
| 1731 | CONTIG224 | 4671 | 5011 | 1.11 | 3.70E-02 | transcription_start_site | - | 5511 | 5511 | 670   | 35362 | AN9515 |
| 1731 | CONTIG224 | 4671 | 5011 | 1.11 | 3.70E-02 | transcription_start_site | - | 4149 | 4149 | -692  | 35364 | AN9515 |
| 1731 | CONTIG224 | 4671 | 5011 | 1.11 | 3.70E-02 | transcription_start_site | - | 4011 | 4011 | -830  | 35365 | AN9515 |
| 1731 | CONTIG224 | 4671 | 5011 | 1.11 | 3.70E-02 | transcription_start_site | - | 3912 | 3912 | -929  | 35366 | AN9515 |
| 2379 | CONTIG225 | 4071 | 4860 | 0.39 | 1.57E-01 | transcription_start_site | - | 4281 | 4281 | -184  | 35367 | AN9516 |
| 2379 | CONTIG225 | 4071 | 4860 | 0.39 | 1.57E-01 | transcription_start_site | - | 4103 | 4103 | -362  | 35368 | AN9516 |
| 2379 | CONTIG225 | 4071 | 4860 | 0.39 | 1.57E-01 | transcription_start_site | - | 3937 | 3937 | -528  | 35369 | AN9516 |
| 2379 | CONTIG225 | 4071 | 4860 | 0.39 | 1.57E-01 | transcription_start_site | - | 3320 | 3320 | -1145 | 35370 | AN9516 |
| 2379 | CONTIG225 | 4071 | 4860 | 0.39 | 1.57E-01 | transcription_start_site | - | 2572 | 2572 | -1893 | 35371 | AN9516 |
| 851  | CONTIG227 | 836  | 1345 | 1.88 | 1.25E-02 | transcription_start_site | + | 3436 | 3436 | -2345 | 35372 | AN9517 |
| 851  | CONTIG227 | 836  | 1345 | 1.88 | 1.25E-02 | transcription_start_site | + | 4360 | 4360 | -3269 | 35373 | AN9517 |
| 851  | CONTIG227 | 836  | 1345 | 1.88 | 1.25E-02 | transcription_start_site | + | 4864 | 4864 | -3773 | 35374 | AN9517 |
| 1605 | CONTIG227 | 1586 | 2300 | 1.2  | 5.49E-02 | transcription_start_site | + | 3436 | 3436 | -1493 | 35372 | AN9517 |
| 1605 | CONTIG227 | 1586 | 2300 | 1.2  | 5.49E-02 | transcription_start_site | + | 4360 | 4360 | -2417 | 35373 | AN9517 |
| 1605 | CONTIG227 | 1586 | 2300 | 1.2  | 5.49E-02 | transcription_start_site | + | 4864 | 4864 | -2921 | 35374 | AN9517 |
| 1788 | CONTIG227 | 3838 | 4404 | 1.08 | 8.54E-02 | transcription_start_site | + | 4360 | 4360 | -239  | 35373 | AN9517 |
| 1788 | CONTIG227 | 3838 | 4404 | 1.08 | 8.54E-02 | transcription_start_site | + | 3436 | 3436 | 685   | 35372 | AN9517 |
| 1788 | CONTIG227 | 3838 | 4404 | 1.08 | 8.54E-02 | transcription_start_site | + | 4864 | 4864 | -743  | 35374 | AN9517 |
| 521  | CONTIG230 | 1811 | 2163 | 2.29 | 3.01E-02 | transcription_start_site | + | 2599 | 2599 | -612  | 35387 | AN9523 |
| 2241 | CONTIG233 | 2871 | 4025 | 0.75 | 7.66E-02 | transcription_start_site | - | 2863 | 2863 | -585  | 35392 | AN9526 |
| 2241 | CONTIG233 | 2871 | 4025 | 0.75 | 7.66E-02 | transcription_start_site | - | 2558 | 2558 | -890  | 35393 | AN9526 |
| 2241 | CONTIG233 | 2871 | 4025 | 0.75 | 7.66E-02 | transcription_start_site | - | 2330 | 2330 | -1118 | 35394 | AN9526 |
| 2241 | CONTIG233 | 2871 | 4025 | 0.75 | 7.66E-02 | transcription_start_site | - | 1716 | 1716 | -1732 | 35395 | AN9526 |
| 2251 | CONTIG243 | 86   | 432  | 0.74 | 1.22E-01 | transcription_start_site | + | 242  | 242  | 17    | 35418 | AN9536 |
| 2251 | CONTIG243 | 86   | 432  | 0.74 | 1.22E-01 | transcription_start_site | + | 369  | 369  | -110  | 35419 | AN9536 |
| 2251 | CONTIG243 | 86   | 432  | 0.74 | 1.22E-01 | transcription_start_site | + | 696  | 696  | -437  | 35420 | AN9536 |
| 2251 | CONTIG243 | 86   | 432  | 0.74 | 1.22E-01 | transcription_start_site | + | 865  | 865  | -606  | 35421 | AN9536 |
| 2251 | CONTIG243 | 86   | 432  | 0.74 | 1.22E-01 | transcription_start_site | + | 974  | 974  | -715  | 35422 | AN9536 |
| 2251 | CONTIG243 | 86   | 432  | 0.74 | 1.22E-01 | transcription_start_site | + | 1081 | 1081 | -822  | 35423 | AN9536 |
| 2251 | CONTIG243 | 86   | 432  | 0.74 | 1.22E-01 | transcription_start_site | + | 1263 | 1263 | -1004 | 35424 | AN9536 |
| 2251 | CONTIG243 | 86   | 432  | 0.74 | 1.22E-01 | transcription_start_site | + | 1317 | 1317 | -1058 | 35425 | AN9536 |
| 2251 | CONTIG243 | 86   | 432  | 0.74 | 1.22E-01 | transcription_start_site | + | 1439 | 1439 | -1180 | 35426 | AN9536 |
| 2251 | CONTIG243 | 86   | 432  | 0.74 | 1.22E-01 | transcription_start_site | + | 1539 | 1539 | -1280 | 35427 | AN9536 |

|                |    |     |      |          |                          |   |      |      |       |       |        |
|----------------|----|-----|------|----------|--------------------------|---|------|------|-------|-------|--------|
| 2251 CONTIG243 | 86 | 432 | 0.74 | 1.22E-01 | transcription_start_site | + | 1600 | 1600 | -1341 | 35428 | AN9536 |
| 2251 CONTIG243 | 86 | 432 | 0.74 | 1.22E-01 | transcription_start_site | + | 2171 | 2171 | -1912 | 35429 | AN9537 |
| 2251 CONTIG243 | 86 | 432 | 0.74 | 1.22E-01 | transcription_start_site | + | 2507 | 2507 | -2248 | 35430 | AN9537 |
| 2251 CONTIG243 | 86 | 432 | 0.74 | 1.22E-01 | transcription_start_site | + | 3347 | 3347 | -3088 | 35431 | AN9537 |
| 2251 CONTIG243 | 86 | 432 | 0.74 | 1.22E-01 | transcription_start_site | + | 3504 | 3504 | -3245 | 35432 | AN9537 |
