# Supplementary material for: The Velvet Family of Fungal Regulators Contains a DNA-Binding Domain Structurally Similar to NF-κB
Source: PubMed Central journal article supplement (PMC3876986; doi:10.1371/journal.pbio.1001750), 2013-12-31
Supplement: pbio.1001750.s017.pdf [file pbio.1001750.s017.pdf]

**Table S2.** Proposed VosA-binding motifs from VosA-ChIP-chip data

| Motif                                                                              | p-value | % of Targets | % of Background |
|------------------------------------------------------------------------------------|---------|--------------|-----------------|
|   | 1e-48   | 51.33%       | 14.72%          |
|   | 1e-15   | 10.67%       | 1.68%           |
|   | 1e-15   | 12.67%       | 2.48%           |
|   | 1e-14   | 12.67%       | 2.61%           |
|  | 1e-14   | 5.00%        | 0.24%           |
