# Supplementary material for: The Velvet Family of Fungal Regulators Contains a DNA-Binding Domain Structurally Similar to NF-κB
Source: PubMed Central journal article supplement (PMC3876986; doi:10.1371/journal.pbio.1001750), 2013-12-31
Supplement: pbio.1001750.s018.pdf [file pbio.1001750.s018.pdf]

**Table S3.** Selected VosA target genes used for MEME analysis

| <b>Contig</b> | <b>Locus</b> | <b>maxLevel<sup>a</sup></b> | <b>Score<sup>b</sup></b> | <b>Annotation</b>                                                    |
|---------------|--------------|-----------------------------|--------------------------|----------------------------------------------------------------------|
| CONTIG160     | AN8694       | 3.78                        | 182.65                   | Fungal Zn(2)-Cys(6) binuclear cluster domain                         |
| CONTIG51      | AN3152       | 3.71                        | 215.62                   | sexual development transcription factor , NsdD                       |
| CONTIG93      | AN5371       | 3.47                        | 72.32                    | Hypothetical protein                                                 |
| CONTIG51      | AN3079       | 3.48                        | 112.28                   | Secreted thaumatin-like protein, CteA                                |
| CONTIG5       | AN0279       | 3.48                        | 338.19                   | myb-like DNA-binding transcription factor, FlbD                      |
| CONTIG29      | AN1959       | 3.50                        | 109.89                   | The <i>velvet</i> protein, VosA                                      |
| CONTIG161     | AN8741       | 3.45                        | 297.17                   | C <sub>2</sub> H <sub>2</sub> finger domain transcription factor     |
| CONTIG109     | AN6508       | 3.31                        | 138.97                   | Putative protein kinase, Gsk3                                        |
| CONTIG80      | AN4680       | 3.33                        | 82.71                    | Putative transcription factor, RfeG                                  |
| CONTIG98      | AN5709       | 3.29                        | 85.44                    | Hypothetical protein                                                 |
| CONTIG29      | AN1936       | 2.98                        | 65.75                    | Regulatory protein involved in conidiation, WetA                     |
| CONTIG14      | AN0973       | 1.53                        | 13.28                    | C <sub>2</sub> H <sub>2</sub> zinc finger transcription factor, Br1A |
| CONTIG94      | AN5523       | 1.34                        | 14.68                    | Putative $\alpha,\alpha$ -trehalose-phosphate synthase, TpsA         |
| CONTIG57      | AN3441       | 1.60                        | 14.69                    | Trehalose 6-phosphate phosphatase, Or1A                              |
| CONTIG172     | AN9340       | 2.56                        | 32.99                    | $\alpha,\alpha$ -trehalose with a role in trehalose hydrolysis, TreA |

a, The highest smoothed probe level in the enriched region.

b, The sum of smoothed probe levels minus the threshold.
