# Supplementary material for: The Velvet Family of Fungal Regulators Contains a DNA-Binding Domain Structurally Similar to NF-κB
Source: PubMed Central journal article supplement (PMC3876986; doi:10.1371/journal.pbio.1001750), 2013-12-31
Supplement: pbio.1001750.s019.pdf [file pbio.1001750.s019.pdf]

**Table S4: DNA oligos used in this study**

| Oligoname | Sequence (5'-3')                                                        |
|-----------|-------------------------------------------------------------------------|
| JG45      | CCCCATGGCGATGTACGCTGTTGAGGATAGG                                         |
| JG46      | CCCTCGAGGTATTCGTTATCCAGACCATC                                           |
| JG337     | TTTCCCATGGCGATGCAGCCGGAACCAGAGTCGCTT                                    |
| JG338     | TTCATGTGTACCGTCCGCGTTC                                                  |
| JG339     | ACGCGGACGGTACACATGAAGCATCGATCCCGCCGTCGACGGCAGGTTG<br>CTTGAGTGCCAGTG CAT |
| JG342     | AAACCATGGTTAGTGGTGGTGGTGGTGGTGAGCGCTGGGGATCTTGATT<br>CCTTGGTTCG         |
| JG365     | CGGCGGGTCAACCGTTTTGCGCTCTTCTCCGCCCC                                     |
| JG366     | CCGGTTGACCCGCCGCGAT                                                     |
| JG367     | TTTCCATGGTTATTTTTCGAACTGCGGGTGGCT                                       |
| JG368     | CGGCGGGTCAACCGTTTTGCGCTCTGCCTC                                          |
| JG369     | CGGCGGGTCAACCGTTTTGGCCTCTTCTC                                           |
| JG370     | CGGCGGGTCAACCGGTGCGCGCTCTTCTC                                           |
| JG371     | CGGCGGGTCAACCGGTGCGGCCTCTGCCTCCGCCCC                                    |
| JG372     | AAACGGTGAACCGCTCCGAGACGAT                                               |
| JG489     | ATCGATAAGCTTGATGTTTAAACAAGGGCTCCTGTCCGATC                               |
| JG490     | GCGCGCCCGATTGGGGTTTTG                                                   |
| JG491     | CCCAATCGGGCGCGCGTGGCCGGTGGGGCGGAGGCAGGT                                 |
| JG492     | ATGGGATCCCGTAATTCACCGAGGAGTTCCGTTGCT                                    |
| JG493     | TACAAACAAAGATGCGGATTCTCGTTTGTGGAACACCT                                  |
| JG494     | CTGCAGGAATTCGATGTTTAACTTGTTAACTGTAAAGTCTCTGA                            |
| JG553     | ATGCCCGACTTTCTCTCTGGAT                                                  |
| JG554     | CTGCCTGGTGACGGTAGTTGTT                                                  |
| JG557     | CTTCCATTCCACCGTCTACTGC                                                  |
| JG558     | CGTCCGTCTTTCGCATTTCA                                                    |
| JG636     | ATTCGGCGACTAGGATCTTACCCGCGGCCGAG                                        |
| JG637     | TAAGCCGCTGATCCTAGAATGGGCGCCGGCTC                                        |
| JG638     | ATTCGGCGACTAGGATCTTACTGGCCGAG                                           |
| JG639     | TAAGCCGCTGATCCTAGAATGACCGGCTC                                           |
| JG640     | ATTCGGCGACTAGGATCTTACCCGAG                                              |
| JG641     | TAAGCCGCTGATCCTAGAATGGGCTC                                              |
| JG642     | CGGCGGGTCAACCGTTTTGCGCTCTGCCTCCGCCCC                                    |

|        |                                     |
|--------|-------------------------------------|
| OHS301 | ATTCGGCGACTAGGATCTTACTGGCCGCGGCCGAG |
| OHS302 | TAAGCCGCTGATCCTAGAATGACCGGCGCCGGCTC |
| OHS419 | GATTGAGTGCCGTCTAGCGTGC              |
| OHS420 | AGGTAGTCTGAGGACGTGGACG              |
| OHS421 | CGTTAGTCCGCATTCCTCTCCC              |
| OHS422 | ATGGAAGAGGCTGCCAGAAGACC             |
| OHS425 | CCAAACGCTCTCTTGTTCTGG               |
| OHS426 | CAGTTGGAGAAGTAGCTAGCAGG             |
| OHS427 | CTTGGCATAATCATGCAAATCCC             |
| OHS428 | CTGAGCTTGGGATTGGGAACG               |
| OHS431 | GGTGTTTTGTCCCATTCCCGAC              |
| OHS432 | CATCACATACTGACTCACTTTCCCG           |
| OHS512 | ATGCGAAATCAGTCCAGCCTGTC             |
| OHS513 | AAGCAGAACCAGGAGTTCGTTCCG            |
| OHS616 | CGTTTCTTCCACCCGAGATGG               |
| OHS617 | CAGGAGTCTCTTTGGTGGGAAG              |
| OHS620 | ACAATGTCTGAAGCACATGCGCC             |
| OHS621 | TCTACATCGCCGCCTGCTTTCC              |
| OHS723 | ATATGTCGACTCATGGCTACACTTGCAGCACCACC |
| OHS724 | ATATGCGGCCGCACGCATGGTGGCAGGCTTTG    |
| OHS739 | ATGTCGAACAATCCGAACCCGAG             |
| OHS740 | GGTTGACCATGAGCACCGTAAAG             |
| OHS741 | ATGATGTTACCAAGGCTCTCG               |
| OHS742 | TTACGCGCCGAGAGTCAGG                 |
| OHS743 | ATGGATCTCGCCAACCTCATCTC             |
| OHS744 | TTACACCATCGCGACAGCCCTC              |
| OHS745 | ATGTCACAGAATCGGTCTGGGG              |
| OHS746 | TCCCGTGTAGGAGTACCGAGAAC             |
| OHS747 | ATGACTAGCCGTCAGAATGAATACT           |
| OHS748 | AGCCTCTCTTTCTCTTGCTGGC              |
| OHS753 | ATGTCTCCCAGACCACCAAGTATC            |
| OHS754 | GGCTTGAGCTTGGATATGAACCG             |
| ONK14  | ATATGAATTCATGAGTGCGGCGAACTATCCAG    |
| ONK322 | ATGGCCAACACACCGTCGTG                |
| ONK323 | TCAGTTCAAGAGGTTGTGCGAGG             |
| OMN178 | CGA GTA CGC CAA TCA ATT CCG         |

|              |                                                                           |
|--------------|---------------------------------------------------------------------------|
| OMN179       | AGT AGA GGC ACA GGC TGG ATC                                               |
| OMN184       | CGGGATCCATGAGTGCGGCGAACTATCCAG                                            |
| OMN185       | CGGGATCCATGCAAATCCCTGGAAGTAGC                                             |
| OMN303       | ACGCGTGCACCCCGAGGAGTTCCGTTGCTGAG                                          |
| OMN340       | ATGGGATCACTAGAGGCTGGA                                                     |
| OMN341       | TTAATGACTCCTCGGTGACACC                                                    |
| OJA142       | CTGGCAGGTGAACAAGTC                                                        |
| OJA143       | AGAAGTTAACACCGTAGA                                                        |
| OZG479       | TTTCCCATGGGTGCGGCGAACTATCCAGATC                                           |
| OZG480       | TTTCCATGGTTATTTTTCGAACTGCGGGTGGCTCCAAGCGCTTGTGCGCG<br>GCTCCTTTCGAATCCTTAG |
| RT H2A 5'(+) | TGCGGTGCTGTTAAGCGTTT                                                      |
| RT H2A 3'(-) | CGGATGGCAAGCTGTAGGTG                                                      |
